# Supplementary material for: Differential 14-3-3 Affinity Capture Reveals New Downstream Targets of Phosphatidylinositol 3-Kinase Signaling
Source: PubMed Central journal article supplement — Mol Cell Proteomics. 2009 Aug 1;8(11):2487–99. doi: 10.1074/mcp.M800544-MCP200 (PMC2773716; doi:10.1074/mcp.m800544-mcp200), 2009-08-01
Supplement: M800544-MCP200_1.pdf [file M800544-MCP200_1.pdf]

### **Supplementary figure 1**

#### **MSMS spectra for phosphopeptides identified in the titanium dioxide screen**

These are the annotated MSMS spectra and corresponding tables of theoretical fragment ions, indicating the phosphorylated residues within the phosphopeptides listed in supplementary tables 2 and 3. The first spectra shown are for the phosphopeptides that are also listed in Table I in the main text because they are from proteins that were also identified by their D0/D4 (+/- insulin) ratios in supplementary table 1. Neutral loss of -98 corresponds to neutral loss of phosphoric acid (H<sub>3</sub>PO<sub>4</sub>, -98). Multiply charged ions are indicated with a +2.

### **Supplementary figure 2**

#### **MSMS spectra for single-peptide-based protein identifications in the quantitative (D0/D4 +/-insulin) screen**

These are the annotated MSMS spectra and the corresponding fragmentation tables for the 86 single-peptide-based protein identifications reported in supplementary table 1. Neutral losses of phosphoric acid (H<sub>3</sub>PO<sub>4</sub>, -98), water (H<sub>2</sub>O, -18) and ammonia (NH<sub>3</sub>, -17) are highlighted by -98, ° and \*, respectively. Multiply charged ions are indicated with a ++. The distribution of the error for the fragment ions experimental mass is reported in ppm and Da. First peptide hits from the MSMS spectrum are reported with their corresponding Mascot score.

### **Supplementary table 1**

#### **D0/D4 ratios of proteins from 14-3-3-affinity captured proteins**

Supplementary Table 1 D0/D4 (+/- insulin) ratios of dimethyl-labelled peptides from 14-3-3-affinity captured proteins from insulin-stimulated and unstimulated HeLa cells, as described in main text. Approved gene names linked to IPI numbers were found using Bioinformatic Harvester (<http://harvester.fzk.de/harvester/human/>). Band 1 is at the top (high molecular mass end) and Band 7 at the bottom of the SDS-gel (see main Materials and Methods). L under D0/D4 ratio means that only the light D0 peptides (+ insulin) were found for that protein. A \* beside the gene symbol indicates the proteins that were identified in this screen, and also in the phosphopeptide analyses (supplementary tables 2 and 3). The proteins marked \* are also listed in Table I within the main text.

### **Supplementary table 2**

#### **Mass spectrometry information for identified phosphopeptides**

The phosphorylated peptides identified by their MSMS spectra (supplementary Fig 1) are assigned to proteins and listed with their protein assignment statistics as explained in Materials and methods. The peptides identified by MS are within the square brackets and they have been manually extended to reveal the preceding sequence within the protein. Approved gene names linked to IPI numbers were found using Bioinformatic Harvester (<http://harvester.fzk.de/harvester/human/>). Within peptides sequences lower case s and t indicate the positions of the phosphorylated residues. (SS), (SSS), (TLS), (ST) within a sequence means that the position of the phosphorylated residue could not be pinpointed precisely within these regions.

### **Supplementary table 3**

#### **Motif and bibliographic information for identified phosphopeptides**

The phosphorylated peptides identified by their MS2 spectra (supplementary Fig 1) are assigned to proteins and listed with their protein assignment statistics in

supplementary table 2. The peptides identified by MS are within the square brackets and they have been manually extended to reveal the preceding sequence within the protein. Here, the same phosphopeptides are linked to the literature on previously-studied 14-3-3-binding proteins, with different types of phosphorylated motif highlighted, including the 14 unique RxRxx(pS/T) motifs within 13 proteins whose phosphorylated residues are in yellow, Rxx(pS/T) in red/orange, (pS/T)P in green, and other motifs in teal (221 unique sites in total). Within peptides sequences lower case s and t indicate the positions of the phosphorylated residues. (SS), (SSS), (TLS), (ST) within a sequence means that the position of the phosphorylated residue could not be pinpointed precisely within these regions. Approved gene names linked to IPI numbers were found using Bioinformatic Harvester (<http://harvester.fzk.de/harvester/human/>). Gene names are shaded in pink for proteins that have already been reported to bind to 14-3-3s in response to insulin and/or PKB phosphorylation, or that were confirmed to bind to 14-3-3s in response to insulin/IGF1 in this study. Turquoise shading is for proteins that have been found to be phosphorylated and bind directly to 14-3-3s, but not in response to insulin (or in some cases it is not yet known whether they are regulated by insulin). TSC2 and CRT2 are in both colours because whether or not their 14-3-3 binding is regulated by insulin appears to be controversial. Grey shading is for proteins isolated in previous 14-3-3-binding proteomics screens, but whether they bind directly to 14-3-3s is not known. A \* beside the gene symbols indicates the phosphopeptides from proteins whose D0/D4 ratios were also identified (supplementary table 1) and this overlapping set of proteins is also listed in Table I within the main text.

#### **Supplementary table 4**

##### **Extended version of supplementary table 1**

Supplementary table 4 adds peptide level information to Supplementary table 1 (D0/D4 ratios of proteins from 14-3-3-affinity captured proteins). For every identified peptide, additional informations are experimental m/z (pep\_exp\_mz), experimental mass (pep\_exp\_mr), expected charge state (pep\_exp\_z), theoretical mass, (pep\_calc\_mr), Mascot score (pep\_score), sequence (pep\_seq). For peptides used in quantification, this table also includes intensity of the D0 peptide (light intensity), intensity of the D4 peptide (heavy intensity) and D0/D4 ratio for the peptide.







MS/MS Fragmentation of AHSSPA<sub>s</sub>LQLGAVSPGTLTPTGVVSGPAATPTAQHLR  
 Found in IPI00009326, 65 kDa Yes-associated protein

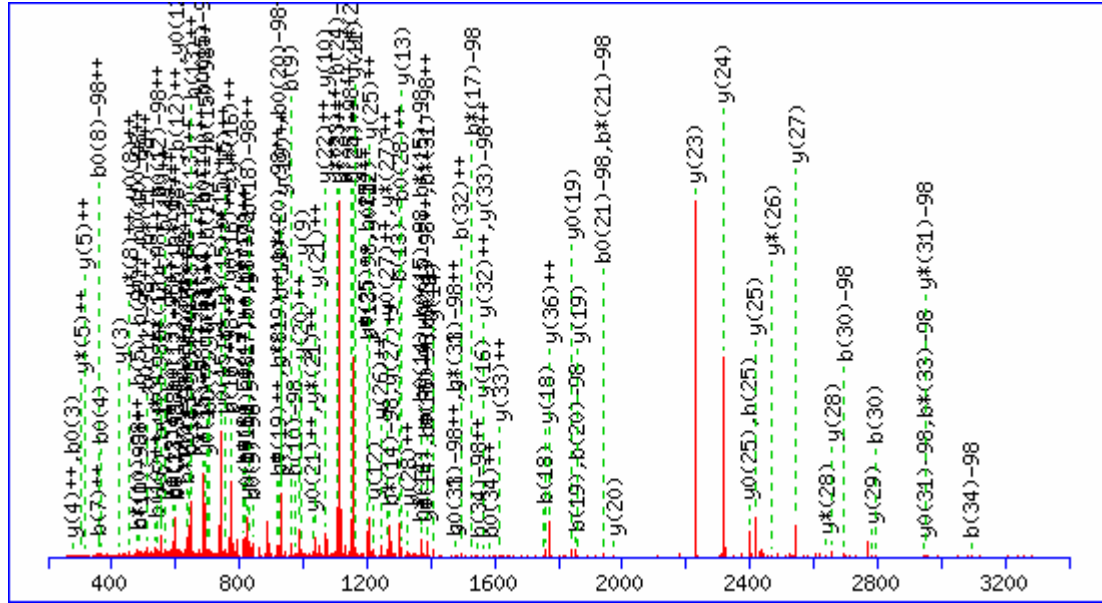

|                        |                                                               |                         |                                                               |                         |                                                               |                         |                                                               |           |                                                 |
|------------------------|---------------------------------------------------------------|-------------------------|---------------------------------------------------------------|-------------------------|---------------------------------------------------------------|-------------------------|---------------------------------------------------------------|-----------|-------------------------------------------------|
| 88.0631 <sup>-2</sup>  | y <sub>1</sub> <sup>-2</sup>                                  | 693.3622 <sup>-2</sup>  | b <sub>12</sub> -H <sub>3</sub> PO <sub>4</sub> <sup>-2</sup> | 1129.5038               | b <sub>11</sub>                                               | 1543.7863               | b <sub>17</sub> -H <sub>3</sub> PO <sub>4</sub>               | 2396.1857 | b <sub>25</sub>                                 |
| 105.0553 <sup>-2</sup> | b <sub>7</sub> <sup>-2</sup>                                  | 693.8243 <sup>-2</sup>  | b <sub>11</sub> <sup>-2</sup>                                 | 1149.6081 <sup>-2</sup> | b <sub>22</sub> -H <sub>3</sub> PO <sub>4</sub> <sup>-2</sup> | 1546.8042 <sup>-2</sup> | b <sub>14</sub> -H <sub>3</sub> PO <sub>4</sub> <sup>-2</sup> | 2415.299  | y <sub>25</sub>                                 |
| 144.6051 <sup>-2</sup> | y <sub>2</sub> <sup>-2</sup>                                  | 703.3810 <sup>-2</sup>  | y <sub>11</sub> <sup>-2</sup>                                 | 1155.0805 <sup>-2</sup> | b <sub>21</sub> <sup>-2</sup>                                 | 1561.8445               | y <sub>16</sub>                                               | 2452.2831 | b <sub>27</sub> -H <sub>3</sub> PO <sub>4</sub> |
| 148.5713 <sup>-2</sup> | b <sub>3</sub> <sup>-2</sup>                                  | 718.2556                | b <sub>7</sub>                                                | 1158.6190 <sup>-2</sup> | y <sub>21</sub> <sup>-2</sup>                                 | 1567.8515 <sup>-2</sup> | y <sub>32</sub> -H <sub>3</sub> PO <sub>4</sub> <sup>-2</sup> | 2453.2072 | b <sub>26</sub>                                 |
| 175.119                | y <sub>1</sub>                                                | 721.8730 <sup>-2</sup>  | b <sub>16</sub> -H <sub>3</sub> PO <sub>4</sub> <sup>-2</sup> | 1162.6327               | y <sub>11</sub>                                               | 1568.3135 <sup>-2</sup> | y <sub>21</sub> <sup>-2</sup>                                 | 2486.3362 | y <sub>26</sub>                                 |
| 192.0873 <sup>-2</sup> | b <sub>4</sub> <sup>-2</sup>                                  | 725.4053                | y <sub>6</sub>                                                | 1178.1188 <sup>-2</sup> | b <sub>22</sub> -H <sub>3</sub> PO <sub>4</sub> <sup>-2</sup> | 1595.7926 <sup>-2</sup> | b <sub>14</sub> <sup>-2</sup>                                 | 2523.3202 | b <sub>28</sub> -H <sub>3</sub> PO <sub>4</sub> |
| 209.1033               | b <sub>2</sub>                                                | 733.3628                | b <sub>2</sub> -H <sub>3</sub> PO <sub>4</sub>                | 1198.5965 <sup>-2</sup> | b <sub>25</sub> <sup>-2</sup>                                 | 1611.3675 <sup>-2</sup> | y <sub>34</sub> -H <sub>3</sub> PO <sub>4</sub> <sup>-2</sup> | 2543.3576 | y <sub>27</sub>                                 |
| 213.1346 <sup>-2</sup> | y <sub>5</sub> <sup>-2</sup>                                  | 742.3507 <sup>-2</sup>  | b <sub>15</sub> <sup>-2</sup>                                 | 1200.5409               | b <sub>12</sub>                                               | 1615.3336 <sup>-2</sup> | b <sub>12</sub> -H <sub>3</sub> PO <sub>4</sub> <sup>-2</sup> | 2550.26   | b <sub>27</sub>                                 |
| 240.6137 <sup>-2</sup> | b <sub>5</sub> <sup>-2</sup>                                  | 752.9152 <sup>-2</sup>  | y <sub>12</sub> <sup>-2</sup>                                 | 1201.6324               | b <sub>13</sub> -H <sub>3</sub> PO <sub>4</sub>               | 1616.8399 <sup>-2</sup> | y <sub>33</sub> <sup>-2</sup>                                 | 2594.3573 | b <sub>29</sub> -H <sub>3</sub> PO <sub>4</sub> |
| 276.1323 <sup>-2</sup> | b <sub>6</sub> <sup>-2</sup>                                  | 770.8614 <sup>-2</sup>  | b <sub>16</sub> <sup>-2</sup>                                 | 1208.1532 <sup>-2</sup> | y <sub>25</sub> <sup>-2</sup>                                 | 1641.7632               | b <sub>17</sub>                                               | 2621.2971 | b <sub>28</sub>                                 |
| 277.1639 <sup>-2</sup> | y <sub>4</sub> <sup>-2</sup>                                  | 772.3968 <sup>-2</sup>  | b <sub>17</sub> -H <sub>3</sub> PO <sub>4</sub> <sup>-2</sup> | 1219.6542               | y <sub>12</sub>                                               | 1654.8835 <sup>-2</sup> | y <sub>35</sub> -H <sub>3</sub> PO <sub>4</sub> <sup>-2</sup> | 2656.4417 | y <sub>28</sub>                                 |
| 288.203                | y <sub>2</sub>                                                | 781.4259 <sup>-2</sup>  | y <sub>10</sub> <sup>-2</sup>                                 | 1226.6452 <sup>-2</sup> | b <sub>27</sub> -H <sub>3</sub> PO <sub>4</sub> <sup>-2</sup> | 1656.8704               | b <sub>18</sub> -H <sub>3</sub> PO <sub>4</sub>               | 2692.3342 | b <sub>29</sub>                                 |
| 296.1353               | b <sub>3</sub>                                                | 821.3853 <sup>-2</sup>  | b <sub>17</sub> <sup>-2</sup>                                 | 1227.1072 <sup>-2</sup> | b <sub>26</sub> <sup>-2</sup>                                 | 1660.3559 <sup>-2</sup> | y <sub>34</sub> <sup>-2</sup>                                 | 2695.405  | b <sub>30</sub> -H <sub>3</sub> PO <sub>4</sub> |
| 310.6430 <sup>-2</sup> | b <sub>7</sub> -H <sub>3</sub> PO <sub>4</sub> <sup>-2</sup>  | 822.4581                | y <sub>7</sub>                                                | 1243.6717 <sup>-2</sup> | y <sub>26</sub> <sup>-2</sup>                                 | 1662.8922               | y <sub>17</sub>                                               | 2784.5003 | y <sub>29</sub>                                 |
| 312.6824 <sup>-2</sup> | y <sub>5</sub> <sup>-2</sup>                                  | 828.9388 <sup>-2</sup>  | b <sub>18</sub> -H <sub>3</sub> PO <sub>4</sub> <sup>-2</sup> | 1262.1637 <sup>-2</sup> | b <sub>22</sub> -H <sub>3</sub> PO <sub>4</sub> <sup>-2</sup> | 1664.3221 <sup>-2</sup> | b <sub>14</sub> <sup>-2</sup>                                 | 2792.4577 | b <sub>31</sub> -H <sub>3</sub> PO <sub>4</sub> |
| 359.6314 <sup>-2</sup> | b <sub>7</sub> <sup>-2</sup>                                  | 831.3397                | b <sub>8</sub>                                                | 1272.1825 <sup>-2</sup> | y <sub>27</sub> <sup>-2</sup>                                 | 1671.8757 <sup>-2</sup> | b <sub>32</sub> -H <sub>3</sub> PO <sub>4</sub> <sup>-2</sup> | 2793.3819 | b <sub>30</sub>                                 |
| 363.2063 <sup>-2</sup> | y <sub>6</sub> <sup>-2</sup>                                  | 831.9497 <sup>-2</sup>  | y <sub>17</sub> <sup>-2</sup>                                 | 1275.6336 <sup>-2</sup> | b <sub>27</sub> <sup>-2</sup>                                 | 1703.8720 <sup>-2</sup> | y <sub>35</sub> <sup>-2</sup>                                 | 2890.4346 | b <sub>31</sub>                                 |
| 367.1850 <sup>-2</sup> | b <sub>2</sub> -H <sub>3</sub> PO <sub>4</sub> <sup>-2</sup>  | 861.4213                | b <sub>2</sub> -H <sub>3</sub> PO <sub>4</sub>                | 1288.6644               | b <sub>14</sub> -H <sub>3</sub> PO <sub>4</sub>               | 1720.8641 <sup>-2</sup> | b <sub>12</sub> <sup>-2</sup>                                 | 2893.5054 | b <sub>12</sub> -H <sub>3</sub> PO <sub>4</sub> |
| 383.1674               | b <sub>4</sub>                                                | 877.9273 <sup>-2</sup>  | b <sub>18</sub> <sup>-2</sup>                                 | 1297.6823 <sup>-2</sup> | b <sub>29</sub> -H <sub>3</sub> PO <sub>4</sub> <sup>-2</sup> | 1723.4130 <sup>-2</sup> | y <sub>36</sub> -H <sub>3</sub> PO <sub>4</sub> <sup>-2</sup> | 2897.5843 | y <sub>30</sub>                                 |
| 411.7327 <sup>-2</sup> | y <sub>7</sub> <sup>-2</sup>                                  | 879.4627 <sup>-2</sup>  | b <sub>19</sub> -H <sub>3</sub> PO <sub>4</sub> <sup>-2</sup> | 1299.6093               | b <sub>13</sub>                                               | 1754.8473               | b <sub>18</sub>                                               | 2964.5425 | b <sub>33</sub> -H <sub>3</sub> PO <sub>4</sub> |
| 416.1735 <sup>-2</sup> | b <sub>5</sub> <sup>-2</sup>                                  | 880.4761 <sup>-2</sup>  | y <sub>10</sub> <sup>-2</sup>                                 | 1306.6862               | y <sub>13</sub>                                               | 1757.9181               | b <sub>19</sub> -H <sub>3</sub> PO <sub>4</sub>               | 2966.6058 | y <sub>31</sub> -H <sub>3</sub> PO <sub>4</sub> |
| 425.2619               | y <sub>3</sub>                                                | 923.5057                | y <sub>8</sub>                                                | 1311.1522 <sup>-2</sup> | b <sub>28</sub> <sup>-2</sup>                                 | 1758.9315 <sup>-2</sup> | MH-H <sub>3</sub> PO <sub>4</sub> <sup>-2</sup>               | 2991.4823 | b <sub>32</sub>                                 |
| 431.2143 <sup>-2</sup> | b <sub>7</sub> -H <sub>3</sub> PO <sub>4</sub> <sup>-2</sup>  | 927.9891 <sup>-2</sup>  | b <sub>20</sub> -H <sub>3</sub> PO <sub>4</sub> <sup>-2</sup> | 1328.7245 <sup>-2</sup> | y <sub>28</sub> <sup>-2</sup>                                 | 1759.945                | y <sub>18</sub>                                               | 3037.6429 | y <sub>32</sub> -H <sub>3</sub> PO <sub>4</sub> |
| 462.2565 <sup>-2</sup> | y <sub>5</sub> <sup>-2</sup>                                  | 928.4511 <sup>-2</sup>  | b <sub>19</sub> <sup>-2</sup>                                 | 1346.6707 <sup>-2</sup> | b <sub>29</sub> <sup>-2</sup>                                 | 1772.4014 <sup>-2</sup> | y <sub>36</sub> <sup>-2</sup>                                 | 3062.5194 | b <sub>33</sub>                                 |
| 480.2028 <sup>-2</sup> | b <sub>9</sub> <sup>-2</sup>                                  | 931.0000 <sup>-2</sup>  | y <sub>19</sub> <sup>-2</sup>                                 | 1348.2061 <sup>-2</sup> | b <sub>30</sub> -H <sub>3</sub> PO <sub>4</sub> <sup>-2</sup> | 1807.9200 <sup>-2</sup> | MH <sup>-2</sup>                                              | 3064.5827 | y <sub>31</sub>                                 |
| 480.2201               | b <sub>5</sub>                                                | 959.3982                | b <sub>9</sub>                                                | 1385.7172               | b <sub>15</sub> -H <sub>3</sub> PO <sub>4</sub>               | 1854.9708               | b <sub>20</sub> -H <sub>3</sub> PO <sub>4</sub>               | 3092.6011 | b <sub>34</sub> -H <sub>3</sub> PO <sub>4</sub> |
| 487.7563 <sup>-2</sup> | b <sub>10</sub> -H <sub>3</sub> PO <sub>4</sub> <sup>-2</sup> | 974.5054                | b <sub>10</sub> -H <sub>3</sub> PO <sub>4</sub>               | 1386.6413               | b <sub>14</sub>                                               | 1855.895                | b <sub>19</sub>                                               | 3134.6957 | y <sub>33</sub> -H <sub>3</sub> PO <sub>4</sub> |
| 497.7751 <sup>-2</sup> | y <sub>2</sub> <sup>-2</sup>                                  | 976.9775 <sup>-2</sup>  | b <sub>20</sub> <sup>-2</sup>                                 | 1392.7538 <sup>-2</sup> | y <sub>29</sub> <sup>-2</sup>                                 | 1860.9926               | y <sub>19</sub>                                               | 3135.6198 | y <sub>32</sub>                                 |
| 516.2671 <sup>-2</sup> | b <sub>11</sub> -H <sub>3</sub> PO <sub>4</sub> <sup>-2</sup> | 978.5129 <sup>-2</sup>  | b <sub>21</sub> -H <sub>3</sub> PO <sub>4</sub> <sup>-2</sup> | 1396.7325 <sup>-2</sup> | b <sub>31</sub> -H <sub>3</sub> PO <sub>4</sub> <sup>-2</sup> | 1952.9477               | y <sub>20</sub>                                               | 3190.578  | b <sub>34</sub>                                 |
| 533.2936 <sup>-2</sup> | y <sub>10</sub> <sup>-2</sup>                                 | 987.5420 <sup>-2</sup>  | y <sub>20</sub> <sup>-2</sup>                                 | 1397.1946 <sup>-2</sup> | b <sub>30</sub> <sup>-2</sup>                                 | 1956.0185               | b <sub>21</sub> -H <sub>3</sub> PO <sub>4</sub>               | 3221.7277 | y <sub>34</sub> -H <sub>3</sub> PO <sub>4</sub> |
| 536.7448 <sup>-2</sup> | b <sub>10</sub> <sup>-2</sup>                                 | 994.5429                | y <sub>9</sub>                                                | 1405.7546               | y <sub>14</sub>                                               | 1974.0767               | y <sub>20</sub>                                               | 3229.66   | b <sub>35</sub> -H <sub>3</sub> PO <sub>4</sub> |
| 551.2572               | b <sub>6</sub>                                                | 1007.0236 <sup>-2</sup> | b <sub>22</sub> -H <sub>3</sub> PO <sub>4</sub> <sup>-2</sup> | 1442.7387               | b <sub>16</sub> -H <sub>3</sub> PO <sub>4</sub>               | 2013.04                 | b <sub>22</sub> -H <sub>3</sub> PO <sub>4</sub>               | 3232.6726 | y <sub>33</sub>                                 |
| 551.7856 <sup>-2</sup> | b <sub>12</sub> -H <sub>3</sub> PO <sub>4</sub> <sup>-2</sup> | 1027.5013 <sup>-2</sup> | b <sub>21</sub> <sup>-2</sup>                                 | 1445.7210 <sup>-2</sup> | b <sub>31</sub> <sup>-2</sup>                                 | 2053.9954               | b <sub>21</sub>                                               | 3308.7597 | y <sub>35</sub> -H <sub>3</sub> PO <sub>4</sub> |
| 553.3205               | y <sub>4</sub>                                                | 1031.5269               | b <sub>11</sub> -H <sub>3</sub> PO <sub>4</sub>               | 1447.2563 <sup>-2</sup> | b <sub>23</sub> -H <sub>3</sub> PO <sub>4</sub> <sup>-2</sup> | 2075.1244               | y <sub>21</sub>                                               | 3319.7046 | y <sub>34</sub>                                 |
| 565.2555 <sup>-2</sup> | b <sub>11</sub> <sup>-2</sup>                                 | 1038.0658 <sup>-2</sup> | y <sub>21</sub> <sup>-2</sup>                                 | 1449.2958 <sup>-2</sup> | y <sub>30</sub> <sup>-2</sup>                                 | 2111.0169               | b <sub>22</sub>                                               | 3327.6369 | b <sub>35</sub>                                 |
| 581.8200 <sup>-2</sup> | y <sub>11</sub> <sup>-2</sup>                                 | 1056.0121 <sup>-2</sup> | b <sub>22</sub> <sup>-2</sup>                                 | 1482.7749 <sup>-2</sup> | b <sub>33</sub> -H <sub>3</sub> PO <sub>4</sub> <sup>-2</sup> | 2112.1084               | b <sub>23</sub> -H <sub>3</sub> PO <sub>4</sub>               | 3342.7441 | b <sub>36</sub> -H <sub>3</sub> PO <sub>4</sub> |
| 600.7741 <sup>-2</sup> | b <sub>12</sub> <sup>-2</sup>                                 | 1056.5578 <sup>-2</sup> | b <sub>23</sub> -H <sub>3</sub> PO <sub>4</sub> <sup>-2</sup> | 1483.6941               | b <sub>15</sub>                                               | 2132.1458               | y <sub>22</sub>                                               | 3406.6766 | y <sub>35</sub>                                 |
| 601.3198 <sup>-2</sup> | b <sub>13</sub> -H <sub>3</sub> PO <sub>4</sub> <sup>-2</sup> | 1065.58                 | y <sub>10</sub>                                               | 1483.8065 <sup>-2</sup> | y <sub>31</sub> -H <sub>3</sub> PO <sub>4</sub> <sup>-2</sup> | 2210.0853               | b <sub>23</sub>                                               | 3440.721  | b <sub>36</sub>                                 |
| 610.3307 <sup>-2</sup> | y <sub>12</sub> <sup>-2</sup>                                 | 1066.5766 <sup>-2</sup> | y <sub>22</sub> <sup>-2</sup>                                 | 1496.2448 <sup>-2</sup> | b <sub>32</sub> <sup>-2</sup>                                 | 2211.1768               | b <sub>24</sub> -H <sub>3</sub> PO <sub>4</sub>               | 3445.8186 | y <sub>36</sub> -H <sub>3</sub> PO <sub>4</sub> |
| 620.2787               | b <sub>7</sub> -H <sub>3</sub> PO <sub>4</sub>                | 1072.4823               | b <sub>10</sub>                                               | 1504.8231               | y <sub>15</sub>                                               | 2229.1986               | y <sub>23</sub>                                               | 3516.8558 | MH-H <sub>3</sub> PO <sub>4</sub>               |
| 624.3576               | y <sub>5</sub>                                                | 1102.564                | b <sub>12</sub> -H <sub>3</sub> PO <sub>4</sub>               | 1519.3251 <sup>-2</sup> | y <sub>22</sub> -H <sub>3</sub> PO <sub>4</sub> <sup>-2</sup> | 2298.2088               | b <sub>22</sub> -H <sub>3</sub> PO <sub>4</sub>               | 3543.7955 | y <sub>36</sub>                                 |
| 644.8359 <sup>-2</sup> | b <sub>14</sub> -H <sub>3</sub> PO <sub>4</sub> <sup>-2</sup> | 1105.5463 <sup>-2</sup> | b <sub>23</sub> <sup>-2</sup>                                 | 1531.7633 <sup>-2</sup> | b <sub>33</sub> <sup>-2</sup>                                 | 2309.1537               | b <sub>24</sub>                                               | 3614.8327 | MH                                              |
| 650.3083 <sup>-2</sup> | b <sub>13</sub> <sup>-2</sup>                                 | 1106.0920 <sup>-2</sup> | b <sub>24</sub> -H <sub>3</sub> PO <sub>4</sub> <sup>-2</sup> | 1532.7950 <sup>-2</sup> | y <sub>31</sub> <sup>-2</sup>                                 | 2316.2306               | y <sub>24</sub>                                               |           |                                                 |
| 653.8468 <sup>-2</sup> | y <sub>13</sub> <sup>-2</sup>                                 | 1115.1029 <sup>-2</sup> | y <sub>23</sub> <sup>-2</sup>                                 | 1540.7155               | b <sub>16</sub>                                               | 2355.2303               | b <sub>25</sub> -H <sub>3</sub> PO <sub>4</sub>               |           |                                                 |

MS/MS Fragmentation of SQLPLLEQDGGTQNPVSPGMSQELR  
 Found in IPI00009326, 65 kDa Yes-associated protein

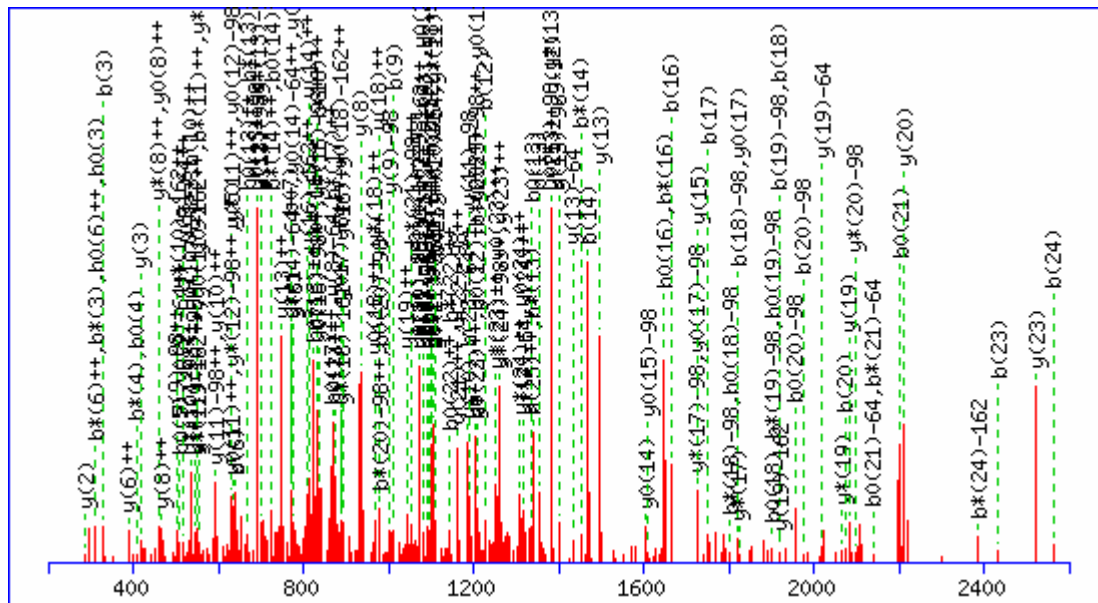

|                        |                                                               |                         |                                                               |                         |                                                                |           |                                                  |           |                                                  |
|------------------------|---------------------------------------------------------------|-------------------------|---------------------------------------------------------------|-------------------------|----------------------------------------------------------------|-----------|--------------------------------------------------|-----------|--------------------------------------------------|
| 88.0631 <sup>+2</sup>  | y <sub>1</sub> <sup>+2</sup>                                  | 751.3985                | b <sub>7</sub> -H <sub>3</sub> PO <sub>4</sub>                | 1156.0346 <sup>+2</sup> | Y <sub>22</sub> -2H <sub>3</sub> PO <sub>4</sub> <sup>+2</sup> | 1549.653  | b <sub>14</sub>                                  | 2212.9176 | y <sub>20</sub>                                  |
| 144.6051 <sup>+2</sup> | y <sub>2</sub> <sup>+2</sup>                                  | 764.3646 <sup>+2</sup>  | y <sub>14</sub> -H <sub>3</sub> PO <sub>4</sub> <sup>+2</sup> | 1163.5045 <sup>+2</sup> | y <sub>21</sub> <sup>+2</sup>                                  | 1625.6989 | y <sub>14</sub>                                  | 2228.0248 | y <sub>21</sub> -H <sub>3</sub> PO <sub>4</sub>  |
| 175.119                | y <sub>1</sub>                                                | 779.3716                | y <sub>6</sub>                                                | 1187.4762               | y <sub>10</sub>                                                | 1628.7697 | y <sub>15</sub> -H <sub>3</sub> PO <sub>4</sub>  | 2289.9693 | b <sub>22</sub> -H <sub>3</sub> PO <sub>4</sub>  |
| 209.1264 <sup>+2</sup> | y <sub>3</sub> <sup>+2</sup>                                  | 813.3531 <sup>+2</sup>  | y <sub>14</sub> <sup>+2</sup>                                 | 1188.5677               | y <sub>11</sub> -H <sub>3</sub> PO <sub>4</sub>                | 1646.7058 | b <sub>15</sub>                                  | 2300.9142 | b <sub>21</sub>                                  |
| 216.0979               | b <sub>2</sub>                                                | 814.8885 <sup>+2</sup>  | y <sub>15</sub> -H <sub>3</sub> PO <sub>4</sub> <sup>+2</sup> | 1204.5610 <sup>+2</sup> | Y <sub>23</sub> -2H <sub>3</sub> PO <sub>4</sub> <sup>+2</sup> | 1647.7973 | b <sub>16</sub> -H <sub>3</sub> PO <sub>4</sub>  | 2311.0619 | y <sub>22</sub> -2H <sub>3</sub> PO <sub>4</sub> |
| 273.1557 <sup>+2</sup> | y <sub>4</sub> <sup>+2</sup>                                  | 836.3931                | y <sub>7</sub>                                                | 1205.0230 <sup>+2</sup> | Y <sub>22</sub> -H <sub>3</sub> PO <sub>4</sub> <sup>+2</sup>  | 1685.7912 | y <sub>16</sub> -H <sub>3</sub> PO <sub>4</sub>  | 2320.051  | b <sub>23</sub> -2H <sub>3</sub> PO <sub>4</sub> |
| 288.203                | y <sub>2</sub>                                                | 843.3992 <sup>+2</sup>  | y <sub>16</sub> -H <sub>3</sub> PO <sub>4</sub> <sup>+2</sup> | 1206.5038               | b <sub>11</sub>                                                | 1726.7466 | y <sub>15</sub>                                  | 2326.0017 | y <sub>21</sub>                                  |
| 316.6717 <sup>+2</sup> | y <sub>5</sub> <sup>+2</sup>                                  | 849.3754                | b <sub>7</sub>                                                | 1209.5746               | b <sub>12</sub> -H <sub>3</sub> PO <sub>4</sub>                | 1734.8293 | b <sub>17</sub> -H <sub>3</sub> PO <sub>4</sub>  | 2387.9462 | b <sub>22</sub>                                  |
| 329.1819               | b <sub>3</sub>                                                | 863.8769 <sup>+2</sup>  | y <sub>15</sub> <sup>+2</sup>                                 | 1253.5494 <sup>+2</sup> | y <sub>23</sub> -H <sub>3</sub> PO <sub>4</sub> <sup>+2</sup>  | 1742.8126 | y <sub>17</sub> -H <sub>3</sub> PO <sub>4</sub>  | 2408.1147 | y <sub>23</sub> -2H <sub>3</sub> PO <sub>4</sub> |
| 390.1894 <sup>+2</sup> | y <sub>6</sub> <sup>+2</sup>                                  | 871.9099 <sup>+2</sup>  | y <sub>17</sub> -H <sub>3</sub> PO <sub>4</sub> <sup>+2</sup> | 1254.0115 <sup>+2</sup> | y <sub>22</sub> <sup>+2</sup>                                  | 1745.7742 | b <sub>16</sub>                                  | 2409.0388 | y <sub>22</sub> -H <sub>3</sub> PO <sub>4</sub>  |
| 417.2456               | y <sub>3</sub>                                                | 879.4571                | b <sub>8</sub> -H <sub>3</sub> PO <sub>4</sub>                | 1261.1030 <sup>+2</sup> | Y <sub>24</sub> -2H <sub>3</sub> PO <sub>4</sub> <sup>+2</sup> | 1783.7681 | y <sub>16</sub>                                  | 2418.0279 | b <sub>23</sub> -H <sub>3</sub> PO <sub>4</sub>  |
| 418.7002 <sup>+2</sup> | y <sub>7</sub> <sup>+2</sup>                                  | 892.3877 <sup>+2</sup>  | y <sub>16</sub> <sup>+2</sup>                                 | 1285.6205               | y <sub>12</sub> -H <sub>3</sub> PO <sub>4</sub>                | 1803.8508 | b <sub>18</sub> -2H <sub>3</sub> PO <sub>4</sub> | 2449.0936 | b <sub>24</sub> -2H <sub>3</sub> PO <sub>4</sub> |
| 426.2347               | b <sub>4</sub>                                                | 920.8984 <sup>+2</sup>  | y <sub>17</sub> <sup>+2</sup>                                 | 1286.5446               | y <sub>11</sub>                                                | 1832.8062 | b <sub>17</sub>                                  | 2506.0916 | y <sub>23</sub> -H <sub>3</sub> PO <sub>4</sub>  |
| 467.2266 <sup>+2</sup> | y <sub>8</sub> <sup>+2</sup>                                  | 929.4234 <sup>+2</sup>  | y <sub>18</sub> -H <sub>3</sub> PO <sub>4</sub> <sup>+2</sup> | 1302.5379 <sup>+2</sup> | y <sub>23</sub> <sup>+2</sup>                                  | 1840.7895 | y <sub>17</sub>                                  | 2507.0157 | y <sub>22</sub>                                  |
| 501.7373 <sup>+2</sup> | y <sub>9</sub> -H <sub>3</sub> PO <sub>4</sub> <sup>+2</sup>  | 933.4458                | y <sub>8</sub>                                                | 1307.5515               | b <sub>12</sub>                                                | 1857.8396 | y <sub>18</sub> -H <sub>3</sub> PO <sub>4</sub>  | 2516.0048 | b <sub>23</sub>                                  |
| 509.2718               | b <sub>5</sub> -H <sub>3</sub> PO <sub>4</sub>                | 977.434                 | b <sub>8</sub>                                                | 1310.0915 <sup>+2</sup> | Y <sub>24</sub> -H <sub>3</sub> PO <sub>4</sub> <sup>+2</sup>  | 1900.9035 | b <sub>19</sub> -2H <sub>3</sub> PO <sub>4</sub> | 2521.1987 | y <sub>24</sub> -2H <sub>3</sub> PO <sub>4</sub> |
| 545.2533 <sup>+2</sup> | y <sub>10</sub> -H <sub>3</sub> PO <sub>4</sub> <sup>+2</sup> | 978.4119 <sup>+2</sup>  | y <sub>18</sub> <sup>+2</sup>                                 | 1325.1323 <sup>+2</sup> | Y <sub>25</sub> -2H <sub>3</sub> PO <sub>4</sub> <sup>+2</sup> | 1901.8277 | b <sub>18</sub> -H <sub>3</sub> PO <sub>4</sub>  | 2547.0705 | b <sub>24</sub> -H <sub>3</sub> PO <sub>4</sub>  |
| 545.3042               | y <sub>4</sub>                                                | 993.4527 <sup>+2</sup>  | y <sub>19</sub> -H <sub>3</sub> PO <sub>4</sub> <sup>+2</sup> | 1337.6332               | b <sub>13</sub> -H <sub>3</sub> PO <sub>4</sub>                | 1955.8165 | y <sub>18</sub>                                  | 2562.1777 | b <sub>25</sub> -2H <sub>3</sub> PO <sub>4</sub> |
| 550.7257 <sup>+2</sup> | y <sub>9</sub> <sup>+2</sup>                                  | 994.484                 | b <sub>9</sub> -H <sub>3</sub> PO <sub>4</sub>                | 1359.0799 <sup>+2</sup> | y <sub>24</sub> <sup>+2</sup>                                  | 1957.925  | b <sub>20</sub> -2H <sub>3</sub> PO <sub>4</sub> | 2604.0685 | y <sub>23</sub>                                  |
| 594.2418 <sup>+2</sup> | y <sub>10</sub> <sup>+2</sup>                                 | 1002.4673               | y <sub>9</sub> -H <sub>3</sub> PO <sub>4</sub>                | 1374.1207 <sup>+2</sup> | Y <sub>25</sub> -H <sub>3</sub> PO <sub>4</sub> <sup>+2</sup>  | 1985.8981 | y <sub>19</sub> -H <sub>3</sub> PO <sub>4</sub>  | 2619.1756 | y <sub>24</sub> -H <sub>3</sub> PO <sub>4</sub>  |
| 594.7875 <sup>+2</sup> | y <sub>11</sub> -H <sub>3</sub> PO <sub>4</sub> <sup>+2</sup> | 1042.4412 <sup>+2</sup> | y <sub>19</sub> <sup>+2</sup>                                 | 1383.5974               | y <sub>12</sub>                                                | 1998.8804 | b <sub>19</sub> -H <sub>3</sub> PO <sub>4</sub>  | 2645.0474 | b <sub>24</sub>                                  |
| 607.2487               | b <sub>5</sub>                                                | 1051.5055               | b <sub>10</sub> -H <sub>3</sub> PO <sub>4</sub>               | 1399.6634               | y <sub>13</sub> -H <sub>3</sub> PO <sub>4</sub>                | 1999.8046 | b <sub>18</sub>                                  | 2649.2573 | y <sub>25</sub> -2H <sub>3</sub> PO <sub>4</sub> |
| 622.3559               | b <sub>6</sub> -H <sub>3</sub> PO <sub>4</sub>                | 1057.9740 <sup>+2</sup> | y <sub>20</sub> -H <sub>3</sub> PO <sub>4</sub> <sup>+2</sup> | 1417.6368 <sup>+2</sup> | MH-H <sub>3</sub> PO <sub>4</sub> <sup>+2</sup>                | 2055.9019 | b <sub>20</sub> -H <sub>3</sub> PO <sub>4</sub>  | 2660.1546 | b <sub>25</sub> -H <sub>3</sub> PO <sub>4</sub>  |
| 632.3362               | y <sub>5</sub>                                                | 1089.4993               | y <sub>10</sub> -H <sub>3</sub> PO <sub>4</sub>               | 1423.1092 <sup>+2</sup> | y <sub>25</sub> <sup>+2</sup>                                  | 2083.875  | y <sub>19</sub>                                  | 2717.1525 | y <sub>24</sub>                                  |
| 643.3139 <sup>+2</sup> | y <sub>12</sub> -H <sub>3</sub> PO <sub>4</sub> <sup>+2</sup> | 1092.4609               | b <sub>9</sub>                                                | 1435.6101               | b <sub>13</sub>                                                | 2096.8573 | b <sub>19</sub>                                  | 2747.2342 | y <sub>25</sub> -H <sub>3</sub> PO <sub>4</sub>  |
| 643.7760 <sup>+2</sup> | y <sub>11</sub> <sup>+2</sup>                                 | 1100.4442               | y <sub>9</sub>                                                | 1451.6761               | b <sub>14</sub> -H <sub>3</sub> PO <sub>4</sub>                | 2104.9604 | b <sub>21</sub> -2H <sub>3</sub> PO <sub>4</sub> | 2758.1315 | b <sub>25</sub>                                  |
| 692.3023 <sup>+2</sup> | y <sub>12</sub> <sup>+2</sup>                                 | 1106.9625 <sup>+2</sup> | y <sub>20</sub> <sup>+2</sup>                                 | 1466.6252 <sup>+2</sup> | MH <sup>+2</sup>                                               | 2114.9407 | y <sub>20</sub> -H <sub>3</sub> PO <sub>4</sub>  | 2834.2662 | MH-H <sub>3</sub> PO <sub>4</sub>                |
| 700.3354 <sup>+2</sup> | y <sub>13</sub> -H <sub>3</sub> PO <sub>4</sub> <sup>+2</sup> | 1108.5269               | b <sub>11</sub> -H <sub>3</sub> PO <sub>4</sub>               | 1497.6403               | y <sub>13</sub>                                                | 2153.8788 | b <sub>20</sub>                                  | 2845.2111 | y <sub>25</sub>                                  |
| 720.3328               | b <sub>6</sub>                                                | 1114.5160 <sup>+2</sup> | y <sub>21</sub> -H <sub>3</sub> PO <sub>4</sub> <sup>+2</sup> | 1527.722                | y <sub>14</sub> -H <sub>3</sub> PO <sub>4</sub>                | 2191.9924 | b <sub>22</sub> -2H <sub>3</sub> PO <sub>4</sub> | 2932.2431 | MH                                               |
| 749.3238 <sup>+2</sup> | y <sub>13</sub> <sup>+2</sup>                                 | 1149.4824               | b <sub>10</sub>                                               | 1548.7289               | b <sub>15</sub> -H <sub>3</sub> PO <sub>4</sub>                | 2202.9373 | b <sub>21</sub> -H <sub>3</sub> PO <sub>4</sub>  |           |                                                  |

MS/MS Fragmentation of GDsETDLEALFNAVmNPK  
 Found in IPI00009326, 65 kDa Yes-associated protein

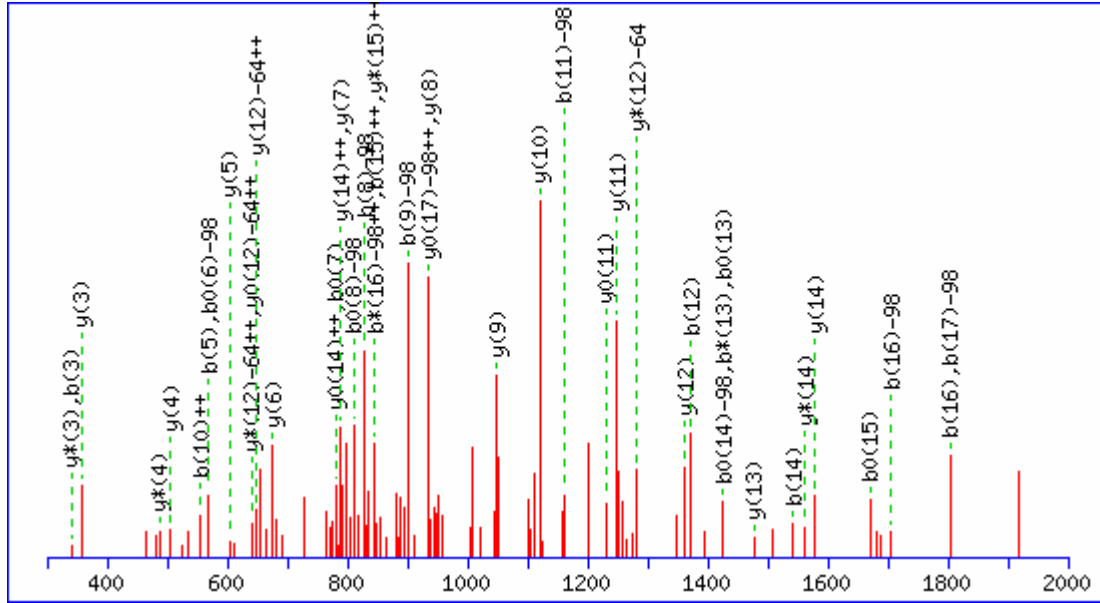

|                        |                                                |                        |                                                |                         |                                                               |           |                                                 |           |                                                 |
|------------------------|------------------------------------------------|------------------------|------------------------------------------------|-------------------------|---------------------------------------------------------------|-----------|-------------------------------------------------|-----------|-------------------------------------------------|
| 74.0600 <sup>+2</sup>  | y <sub>1</sub> <sup>+2</sup>                   | 469.0966               | b <sub>4</sub>                                 | 789.8952 <sup>+2</sup>  | y <sub>14</sub> <sup>+2</sup>                                 | 1049.5448 | y <sub>9</sub>                                  | 1591.6945 | b <sub>15</sub> -H <sub>3</sub> PO <sub>4</sub> |
| 122.5864 <sup>+2</sup> | y <sub>2</sub> <sup>+2</sup>                   | 472.1674               | b <sub>5</sub> -H <sub>3</sub> PO <sub>4</sub> | 798.2553                | b <sub>7</sub>                                                | 1111.4191 | b <sub>10</sub>                                 | 1689.6714 | b <sub>15</sub>                                 |
| 147.1128               | y <sub>1</sub>                                 | 505.2439               | y <sub>4</sub>                                 | 829.321                 | b <sub>8</sub> -H <sub>3</sub> PO <sub>4</sub>                | 1120.5819 | y <sub>10</sub>                                 | 1705.7374 | b <sub>16</sub> -H <sub>3</sub> PO <sub>4</sub> |
| 173.0557               | b <sub>2</sub>                                 | 525.2761 <sup>+2</sup> | y <sub>9</sub> <sup>+2</sup>                   | 854.4165 <sup>+2</sup>  | y <sub>15</sub> <sup>+2</sup>                                 | 1160.5106 | b <sub>11</sub> -H <sub>3</sub> PO <sub>4</sub> | 1707.8258 | y <sub>15</sub>                                 |
| 179.6079 <sup>+2</sup> | y <sub>3</sub> <sup>+2</sup>                   | 560.7946 <sup>+2</sup> | y <sub>10</sub> <sup>+2</sup>                  | 888.9273 <sup>+2</sup>  | y <sub>16</sub> -H <sub>3</sub> PO <sub>4</sub> <sup>+2</sup> | 1249.6245 | y <sub>11</sub>                                 | 1776.8473 | y <sub>16</sub> -H <sub>3</sub> PO <sub>4</sub> |
| 242.0771               | b <sub>3</sub> -H <sub>3</sub> PO <sub>4</sub> | 570.1443               | b <sub>5</sub>                                 | 900.3581                | b <sub>9</sub> -H <sub>3</sub> PO <sub>4</sub>                | 1258.4875 | b <sub>11</sub>                                 | 1802.7902 | b <sub>17</sub> -H <sub>3</sub> PO <sub>4</sub> |
| 244.1656               | y <sub>2</sub>                                 | 587.1944               | b <sub>6</sub> -H <sub>3</sub> PO <sub>4</sub> | 927.2979                | b <sub>8</sub>                                                | 1274.5535 | b <sub>12</sub> -H <sub>3</sub> PO <sub>4</sub> | 1803.7143 | b <sub>16</sub>                                 |
| 253.1256 <sup>+2</sup> | y <sub>4</sub> <sup>+2</sup>                   | 604.3123               | y <sub>5</sub>                                 | 936.4608                | y <sub>8</sub>                                                | 1345.5907 | b <sub>13</sub> -H <sub>3</sub> PO <sub>4</sub> | 1874.8242 | y <sub>16</sub>                                 |
| 302.6598 <sup>+2</sup> | y <sub>5</sub> <sup>+2</sup>                   | 625.3159 <sup>+2</sup> | y <sub>11</sub> <sup>+2</sup>                  | 937.9157 <sup>+2</sup>  | y <sub>16</sub> <sup>+2</sup>                                 | 1362.7086 | y <sub>12</sub>                                 | 1891.8742 | y <sub>17</sub> -H <sub>3</sub> PO <sub>4</sub> |
| 338.1783 <sup>+2</sup> | y <sub>6</sub> <sup>+2</sup>                   | 675.3494               | y <sub>6</sub>                                 | 946.4407 <sup>+2</sup>  | y <sub>17</sub> -H <sub>3</sub> PO <sub>4</sub> <sup>+2</sup> | 1372.5304 | b <sub>12</sub>                                 | 1900.7671 | b <sub>17</sub>                                 |
| 340.054                | b <sub>3</sub>                                 | 681.8579 <sup>+2</sup> | y <sub>12</sub> <sup>+2</sup>                  | 974.9515 <sup>+2</sup>  | MH-H <sub>3</sub> PO <sub>4</sub> <sup>+2</sup>               | 1443.5675 | b <sub>13</sub>                                 | 1948.8957 | MH-H <sub>3</sub> PO <sub>4</sub>               |
| 358.2085               | y <sub>3</sub>                                 | 685.1713               | b <sub>6</sub>                                 | 995.4292 <sup>+2</sup>  | y <sub>17</sub> <sup>+2</sup>                                 | 1444.6591 | b <sub>14</sub> -H <sub>3</sub> PO <sub>4</sub> | 1989.8511 | y <sub>17</sub>                                 |
| 371.1197               | b <sub>4</sub> -H <sub>3</sub> PO <sub>4</sub> | 700.2784               | b <sub>7</sub> -H <sub>3</sub> PO <sub>4</sub> | 998.335                 | b <sub>9</sub>                                                | 1477.7355 | y <sub>13</sub>                                 | 2046.8726 | MH                                              |
| 395.1998 <sup>+2</sup> | y <sub>7</sub> <sup>+2</sup>                   | 739.3714 <sup>+2</sup> | y <sub>13</sub> <sup>+2</sup>                  | 1013.4422               | b <sub>10</sub> -H <sub>3</sub> PO <sub>4</sub>               | 1542.636  | b <sub>14</sub>                                 |           |                                                 |
| 468.7340 <sup>+2</sup> | y <sub>8</sub> <sup>+2</sup>                   | 789.3923               | y <sub>7</sub>                                 | 1023.9399 <sup>+2</sup> | MH <sup>+2</sup>                                              | 1578.7832 | y <sub>14</sub>                                 |           |                                                 |



MS/MS Fragmentation of MFVSSGLPPsPVPSPR  
 Found in IPI00749302, Hypothetical protein DKFZp686L20116

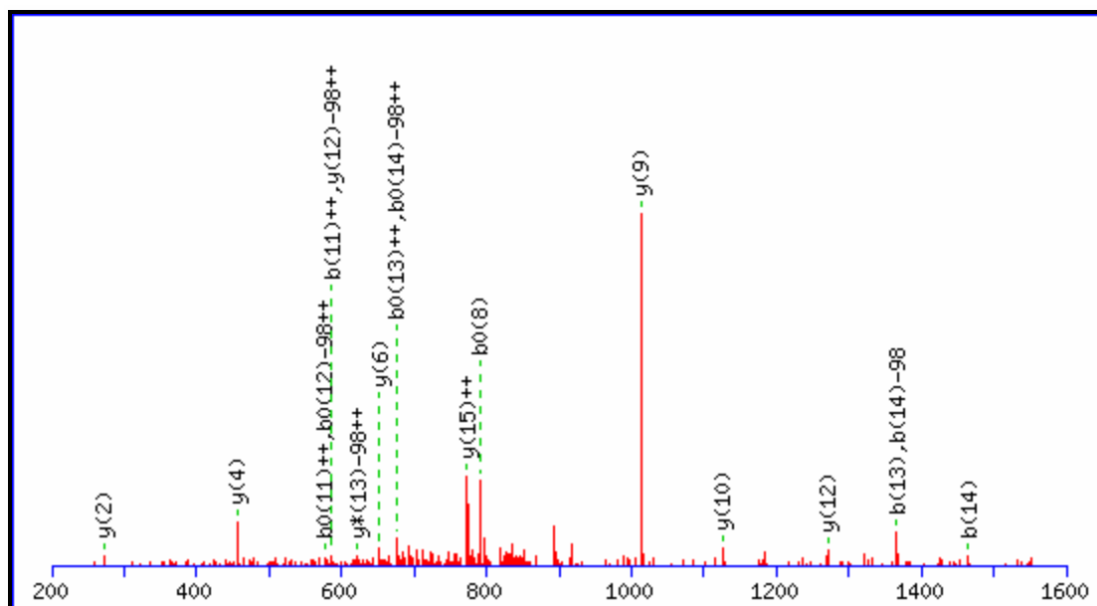

|                        |                                                              |                        |                                                               |                        |                                                               |           |                                                 |           |                                                 |
|------------------------|--------------------------------------------------------------|------------------------|---------------------------------------------------------------|------------------------|---------------------------------------------------------------|-----------|-------------------------------------------------|-----------|-------------------------------------------------|
| 88.0631 <sup>+2</sup>  | y <sub>1</sub> <sup>+2</sup>                                 | 458.7180 <sup>+2</sup> | y <sub>8</sub> <sup>+2</sup>                                  | 696.3021               | b <sub>7</sub>                                                | 1013.4816 | y <sub>9</sub>                                  | 1366.6113 | b <sub>13</sub>                                 |
| 136.5895 <sup>+2</sup> | y <sub>2</sub> <sup>+2</sup>                                 | 465.2166               | b <sub>4</sub>                                                | 721.3991               | y <sub>7</sub> -H <sub>3</sub> PO <sub>4</sub>                | 1028.5887 | y <sub>10</sub> -H <sub>3</sub> PO <sub>4</sub> | 1444.6832 | y <sub>14</sub>                                 |
| 175.119                | y <sub>1</sub>                                               | 507.2444 <sup>+2</sup> | y <sub>9</sub> <sup>+2</sup>                                  | 722.8452 <sup>+2</sup> | y <sub>14</sub> <sup>+2</sup>                                 | 1072.5132 | b <sub>11</sub> -H <sub>3</sub> PO <sub>4</sub> | 1445.7747 | y <sub>15</sub> -H <sub>3</sub> PO <sub>4</sub> |
| 180.1055 <sup>+2</sup> | y <sub>3</sub> <sup>+2</sup>                                 | 514.7980 <sup>+2</sup> | y <sub>10</sub> -H <sub>3</sub> PO <sub>4</sub> <sup>+2</sup> | 723.3910 <sup>+2</sup> | y <sub>15</sub> -H <sub>3</sub> PO <sub>4</sub> <sup>+2</sup> | 1085.6102 | y <sub>11</sub> -H <sub>3</sub> PO <sub>4</sub> | 1452.7192 | b <sub>15</sub> -H <sub>3</sub> PO <sub>4</sub> |
| 228.6319 <sup>+2</sup> | y <sub>4</sub> <sup>+2</sup>                                 | 543.3087 <sup>+2</sup> | y <sub>11</sub> -H <sub>3</sub> PO <sub>4</sub> <sup>+2</sup> | 772.3794 <sup>+2</sup> | y <sub>15</sub> <sup>+2</sup>                                 | 1126.5656 | y <sub>10</sub>                                 | 1463.664  | b <sub>14</sub>                                 |
| 272.1717               | y <sub>2</sub>                                               | 552.2486               | b <sub>5</sub>                                                | 796.9252 <sup>+2</sup> | y <sub>16</sub> -H <sub>3</sub> PO <sub>4</sub> <sup>+2</sup> | 1169.566  | b <sub>12</sub> -H <sub>3</sub> PO <sub>4</sub> | 1543.7516 | y <sub>15</sub>                                 |
| 278.1661 <sup>+2</sup> | y <sub>5</sub> <sup>+2</sup>                                 | 555.3249               | y <sub>5</sub>                                                | 809.3862               | b <sub>8</sub>                                                | 1170.4901 | b <sub>11</sub>                                 | 1549.7719 | b <sub>16</sub> -H <sub>3</sub> PO <sub>4</sub> |
| 279.1162               | b <sub>2</sub>                                               | 563.7865 <sup>+2</sup> | y <sub>10</sub> <sup>+2</sup>                                 | 818.4519               | y <sub>8</sub> -H <sub>3</sub> PO <sub>4</sub>                | 1172.6422 | y <sub>12</sub> -H <sub>3</sub> PO <sub>4</sub> | 1550.6961 | b <sub>15</sub>                                 |
| 326.6925 <sup>+2</sup> | y <sub>6</sub> <sup>+2</sup>                                 | 586.8248 <sup>+2</sup> | y <sub>12</sub> -H <sub>3</sub> PO <sub>4</sub> <sup>+2</sup> | 819.376                | y <sub>7</sub>                                                | 1183.5871 | y <sub>11</sub>                                 | 1592.8431 | y <sub>16</sub> -H <sub>3</sub> PO <sub>4</sub> |
| 359.2037               | y <sub>3</sub>                                               | 592.2972 <sup>+2</sup> | y <sub>11</sub> <sup>+2</sup>                                 | 845.9136 <sup>+2</sup> | y <sub>16</sub> <sup>+2</sup>                                 | 1259.6743 | y <sub>13</sub> -H <sub>3</sub> PO <sub>4</sub> | 1647.7488 | b <sub>16</sub>                                 |
| 361.2032 <sup>+2</sup> | y <sub>7</sub> -H <sub>3</sub> PO <sub>4</sub> <sup>+2</sup> | 630.3408 <sup>+2</sup> | y <sub>13</sub> -H <sub>3</sub> PO <sub>4</sub> <sup>+2</sup> | 862.4454 <sup>+2</sup> | MH-H <sub>3</sub> PO <sub>4</sub> <sup>+2</sup>               | 1267.5429 | b <sub>12</sub>                                 | 1690.82   | y <sub>16</sub>                                 |
| 378.1846               | b <sub>3</sub>                                               | 635.8132 <sup>+2</sup> | y <sub>12</sub> <sup>+2</sup>                                 | 906.439                | b <sub>9</sub>                                                | 1268.6344 | b <sub>13</sub> -H <sub>3</sub> PO <sub>4</sub> | 1723.8836 | MH-H <sub>3</sub> PO <sub>4</sub>               |
| 409.7296 <sup>+2</sup> | y <sub>8</sub> -H <sub>3</sub> PO <sub>4</sub> <sup>+2</sup> | 639.2807               | b <sub>6</sub>                                                | 911.4339 <sup>+2</sup> | MH <sup>+2</sup>                                              | 1270.6191 | y <sub>12</sub>                                 | 1821.8605 | MH                                              |
| 410.1917 <sup>+2</sup> | y <sub>7</sub> <sup>+2</sup>                                 | 652.3777               | y <sub>6</sub>                                                | 915.5047               | y <sub>9</sub> -H <sub>3</sub> PO <sub>4</sub>                | 1346.7063 | y <sub>14</sub> -H <sub>3</sub> PO <sub>4</sub> |           |                                                 |
| 456.2565               | y <sub>4</sub>                                               | 673.8568 <sup>+2</sup> | y <sub>14</sub> -H <sub>3</sub> PO <sub>4</sub> <sup>+2</sup> | 916.4288               | y <sub>8</sub>                                                | 1357.6512 | y <sub>13</sub>                                 |           |                                                 |
| 458.2560 <sup>+2</sup> | y <sub>9</sub> -H <sub>3</sub> PO <sub>4</sub> <sup>+2</sup> | 679.3292 <sup>+2</sup> | y <sub>13</sub> <sup>+2</sup>                                 | 1003.4917              | b <sub>10</sub>                                               | 1365.6871 | b <sub>14</sub> -H <sub>3</sub> PO <sub>4</sub> |           |                                                 |

MS/MS Fragmentation of RIDFTPVsPAPsPTR  
 Found in IPI00749302, Hypothetical protein DKFZp686L20116

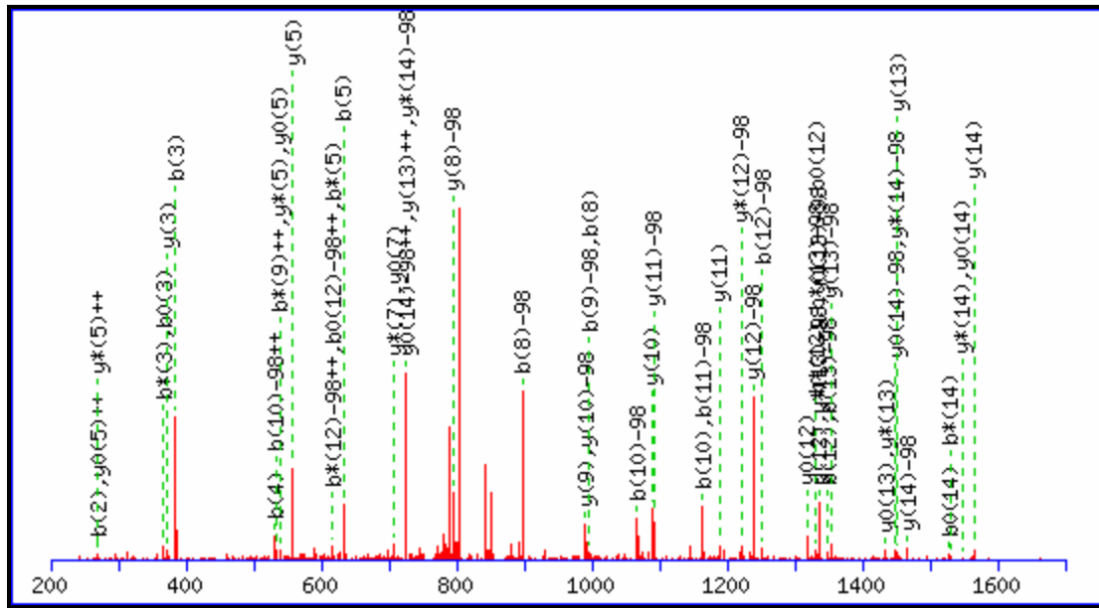

|                        |                                                               |                        |                                                                |                        |                                                                |                        |                                                  |           |                                                  |
|------------------------|---------------------------------------------------------------|------------------------|----------------------------------------------------------------|------------------------|----------------------------------------------------------------|------------------------|--------------------------------------------------|-----------|--------------------------------------------------|
| 88.0631 <sup>+2</sup>  | y <sub>1</sub> <sup>+2</sup>                                  | 437.6946 <sup>+2</sup> | y <sub>8</sub> -H <sub>3</sub> PO <sub>4</sub> <sup>+2</sup>   | 616.8248 <sup>+2</sup> | b <sub>12</sub> -2H <sub>3</sub> PO <sub>4</sub> <sup>+2</sup> | 805.3604               | y <sub>7</sub>                                   | 1220.6422 | y <sub>12</sub> -2H <sub>3</sub> PO <sub>4</sub> |
| 135.5999 <sup>+2</sup> | b <sub>2</sub> <sup>+2</sup>                                  | 438.2403 <sup>+2</sup> | y <sub>9</sub> -2H <sub>3</sub> PO <sub>4</sub> <sup>+2</sup>  | 631.3025 <sup>+2</sup> | b <sub>11</sub> <sup>+2</sup>                                  | 813.8519 <sup>+2</sup> | b <sub>14</sub> <sup>+2</sup>                    | 1232.6422 | b <sub>12</sub> -2H <sub>3</sub> PO <sub>4</sub> |
| 138.5870 <sup>+2</sup> | y <sub>2</sub> <sup>+2</sup>                                  | 442.2409               | y <sub>4</sub> -H <sub>3</sub> PO <sub>4</sub>                 | 633.3355               | b <sub>5</sub>                                                 | 822.8572 <sup>+2</sup> | y <sub>14</sub> <sup>+2</sup>                    | 1261.5977 | b <sub>11</sub>                                  |
| 175.119                | y <sub>1</sub>                                                | 449.7427 <sup>+2</sup> | b <sub>8</sub> -H <sub>3</sub> PO <sub>4</sub> <sup>+2</sup>   | 635.2674 <sup>+2</sup> | y <sub>11</sub> <sup>+2</sup>                                  | 829.4567               | b <sub>7</sub>                                   | 1269.5276 | y <sub>11</sub>                                  |
| 187.1133 <sup>+2</sup> | y <sub>3</sub> <sup>+2</sup>                                  | 486.6830 <sup>+2</sup> | y <sub>8</sub> <sup>+2</sup>                                   | 637.2705               | y <sub>5</sub>                                                 | 851.9193 <sup>+2</sup> | MH-H <sub>3</sub> PO <sub>4</sub> <sup>+2</sup>  | 1318.6191 | y <sub>12</sub> -H <sub>3</sub> PO <sub>4</sub>  |
| 193.1133 <sup>+2</sup> | b <sub>3</sub> <sup>+2</sup>                                  | 486.7667 <sup>+2</sup> | y <sub>10</sub> -2H <sub>3</sub> PO <sub>4</sub> <sup>+2</sup> | 659.8132 <sup>+2</sup> | y <sub>12</sub> -H <sub>3</sub> PO <sub>4</sub> <sup>+2</sup>  | 874.3819               | y <sub>8</sub> -H <sub>3</sub> PO <sub>4</sub>   | 1329.695  | b <sub>13</sub> -2H <sub>3</sub> PO <sub>4</sub> |
| 221.6241 <sup>+2</sup> | y <sub>4</sub> -H <sub>3</sub> PO <sub>4</sub> <sup>+2</sup>  | 487.2288 <sup>+2</sup> | y <sub>9</sub> -H <sub>3</sub> PO <sub>4</sub> <sup>+2</sup>   | 665.3511 <sup>+2</sup> | b <sub>13</sub> -2H <sub>3</sub> PO <sub>4</sub> <sup>+2</sup> | 875.4734               | y <sub>9</sub> -2H <sub>3</sub> PO <sub>4</sub>  | 1330.6191 | b <sub>12</sub> -H <sub>3</sub> PO <sub>4</sub>  |
| 266.6475 <sup>+2</sup> | b <sub>4</sub> <sup>+2</sup>                                  | 498.2691 <sup>+2</sup> | b <sub>9</sub> -H <sub>3</sub> PO <sub>4</sub> <sup>+2</sup>   | 665.8132 <sup>+2</sup> | b <sub>12</sub> -H <sub>3</sub> PO <sub>4</sub> <sup>+2</sup>  | 898.4781               | b <sub>8</sub> -H <sub>3</sub> PO <sub>4</sub>   | 1335.6692 | y <sub>13</sub> -2H <sub>3</sub> PO <sub>4</sub> |
| 270.1504 <sup>+2</sup> | y <sub>5</sub> -H <sub>3</sub> PO <sub>4</sub> <sup>+2</sup>  | 498.7311 <sup>+2</sup> | b <sub>8</sub> <sup>+2</sup>                                   | 668.3382 <sup>+2</sup> | y <sub>13</sub> -2H <sub>3</sub> PO <sub>4</sub> <sup>+2</sup> | 900.9077 <sup>+2</sup> | MH <sup>+2</sup>                                 | 1416.596  | y <sub>12</sub>                                  |
| 270.1925               | b <sub>2</sub>                                                | 532.2878               | b <sub>4</sub>                                                 | 707.3835               | y <sub>7</sub> -H <sub>3</sub> PO <sub>4</sub>                 | 972.3588               | y <sub>8</sub>                                   | 1427.6719 | b <sub>13</sub> -H <sub>3</sub> PO <sub>4</sub>  |
| 270.6125 <sup>+2</sup> | y <sub>4</sub> <sup>+2</sup>                                  | 533.7876 <sup>+2</sup> | b <sub>10</sub> -H <sub>3</sub> PO <sub>4</sub> <sup>+2</sup>  | 708.3076               | y <sub>6</sub>                                                 | 972.5261               | y <sub>10</sub> -2H <sub>3</sub> PO <sub>4</sub> | 1428.596  | b <sub>12</sub>                                  |
| 276.1666               | y <sub>2</sub>                                                | 535.7552 <sup>+2</sup> | y <sub>10</sub> -H <sub>3</sub> PO <sub>4</sub> <sup>+2</sup>  | 708.8017 <sup>+2</sup> | y <sub>12</sub> <sup>+2</sup>                                  | 973.4503               | y <sub>9</sub> -H <sub>3</sub> PO <sub>4</sub>   | 1430.7427 | b <sub>14</sub> -2H <sub>3</sub> PO <sub>4</sub> |
| 305.6690 <sup>+2</sup> | y <sub>6</sub> -H <sub>3</sub> PO <sub>4</sub> <sup>+2</sup>  | 536.2172 <sup>+2</sup> | y <sub>9</sub> <sup>+2</sup>                                   | 714.3396 <sup>+2</sup> | b <sub>13</sub> -H <sub>3</sub> PO <sub>4</sub> <sup>+2</sup>  | 995.5309               | b <sub>9</sub> -H <sub>3</sub> PO <sub>4</sub>   | 1433.6461 | y <sub>13</sub> -H <sub>3</sub> PO <sub>4</sub>  |
| 317.1714 <sup>+2</sup> | b <sub>5</sub> <sup>+2</sup>                                  | 537.2905 <sup>+2</sup> | y <sub>11</sub> -2H <sub>3</sub> PO <sub>4</sub> <sup>+2</sup> | 714.8017 <sup>+2</sup> | b <sub>12</sub> <sup>+2</sup>                                  | 996.455                | b <sub>8</sub>                                   | 1448.7532 | y <sub>14</sub> -2H <sub>3</sub> PO <sub>4</sub> |
| 319.1389 <sup>+2</sup> | y <sub>5</sub> <sup>+2</sup>                                  | 539.2936               | y <sub>5</sub> -H <sub>3</sub> PO <sub>4</sub>                 | 715.8750 <sup>+2</sup> | b <sub>14</sub> -2H <sub>3</sub> PO <sub>4</sub> <sup>+2</sup> | 1066.568               | b <sub>10</sub> -H <sub>3</sub> PO <sub>4</sub>  | 1525.6488 | b <sub>13</sub>                                  |
| 354.1954 <sup>+2</sup> | y <sub>7</sub> -H <sub>3</sub> PO <sub>4</sub> <sup>+2</sup>  | 540.2178               | y <sub>4</sub>                                                 | 717.3267 <sup>+2</sup> | y <sub>13</sub> -H <sub>3</sub> PO <sub>4</sub> <sup>+2</sup>  | 1070.503               | y <sub>10</sub> -H <sub>3</sub> PO <sub>4</sub>  | 1528.7196 | b <sub>14</sub> -H <sub>3</sub> PO <sub>4</sub>  |
| 354.6575 <sup>+2</sup> | y <sub>6</sub> <sup>+2</sup>                                  | 547.2575 <sup>+2</sup> | b <sub>9</sub> <sup>+2</sup>                                   | 724.8803 <sup>+2</sup> | y <sub>14</sub> -2H <sub>3</sub> PO <sub>4</sub> <sup>+2</sup> | 1071.4272              | y <sub>9</sub>                                   | 1531.623  | y <sub>13</sub>                                  |
| 365.6978 <sup>+2</sup> | b <sub>6</sub> <sup>+2</sup>                                  | 582.3140 <sup>+2</sup> | b <sub>11</sub> -H <sub>3</sub> PO <sub>4</sub> <sup>+2</sup>  | 730.3883               | b <sub>6</sub>                                                 | 1073.5738              | y <sub>11</sub> -2H <sub>3</sub> PO <sub>4</sub> | 1546.7301 | y <sub>14</sub> -H <sub>3</sub> PO <sub>4</sub>  |
| 373.2194               | y <sub>3</sub>                                                | 582.7761 <sup>+2</sup> | b <sub>10</sub> <sup>+2</sup>                                  | 763.3280 <sup>+2</sup> | b <sub>13</sub> <sup>+2</sup>                                  | 1093.5078              | b <sub>9</sub>                                   | 1626.6965 | b <sub>14</sub>                                  |
| 385.2194               | b <sub>3</sub>                                                | 584.7436 <sup>+2</sup> | y <sub>10</sub> <sup>+2</sup>                                  | 764.8634 <sup>+2</sup> | b <sub>14</sub> -H <sub>3</sub> PO <sub>4</sub> <sup>+2</sup>  | 1163.6208              | b <sub>11</sub> -H <sub>3</sub> PO <sub>4</sub>  | 1644.707  | y <sub>14</sub>                                  |
| 388.7061 <sup>+2</sup> | y <sub>8</sub> -2H <sub>3</sub> PO <sub>4</sub> <sup>+2</sup> | 586.2790 <sup>+2</sup> | y <sub>11</sub> -H <sub>3</sub> PO <sub>4</sub> <sup>+2</sup>  | 766.3151 <sup>+2</sup> | y <sub>13</sub> <sup>+2</sup>                                  | 1164.5449              | b <sub>10</sub>                                  | 1702.8312 | MH-H <sub>3</sub> PO <sub>4</sub>                |
| 403.1838 <sup>+2</sup> | y <sub>7</sub> <sup>+2</sup>                                  | 610.3307               | y <sub>6</sub> -H <sub>3</sub> PO <sub>4</sub>                 | 773.8687 <sup>+2</sup> | y <sub>14</sub> -H <sub>3</sub> PO <sub>4</sub> <sup>+2</sup>  | 1168.4799              | y <sub>10</sub>                                  | 1800.8081 | MH                                               |
| 415.2320 <sup>+2</sup> | b <sub>7</sub> <sup>+2</sup>                                  | 610.8248 <sup>+2</sup> | y <sub>12</sub> -2H <sub>3</sub> PO <sub>4</sub> <sup>+2</sup> | 776.405                | y <sub>8</sub> -2H <sub>3</sub> PO <sub>4</sub>                | 1171.5507              | y <sub>11</sub> -H <sub>3</sub> PO <sub>4</sub>  |           |                                                  |

MS/MS Fragmentation of RIDFTPVSPAPsPTR  
 Found in IPI00749302, Hypothetical protein DKFzP686L20116

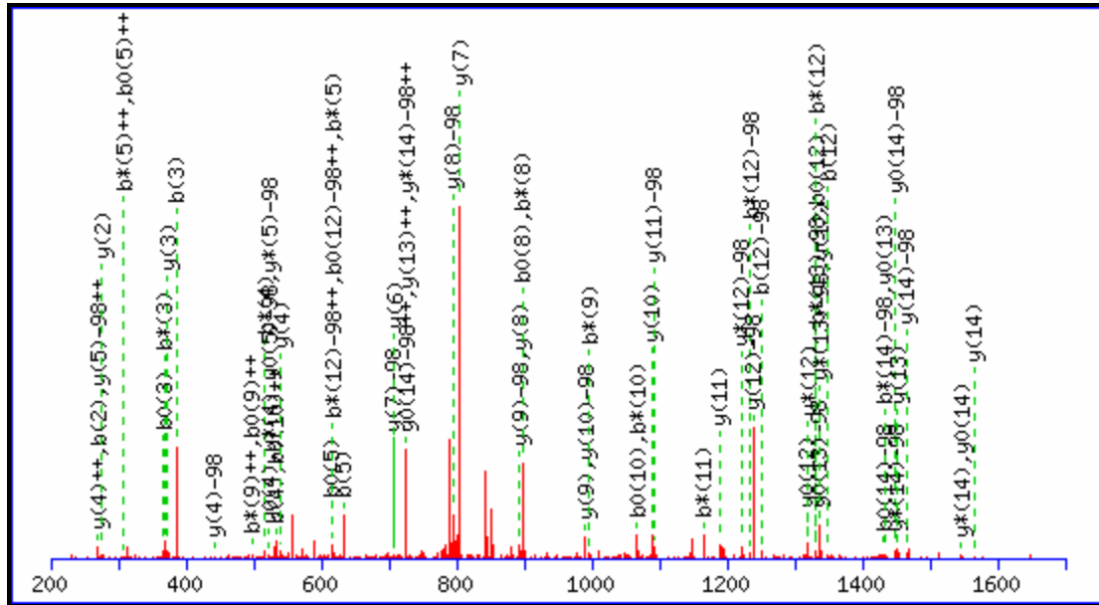

|                        |                                                              |                        |                                                               |                        |                                                               |                        |                                                 |           |                                                 |
|------------------------|--------------------------------------------------------------|------------------------|---------------------------------------------------------------|------------------------|---------------------------------------------------------------|------------------------|-------------------------------------------------|-----------|-------------------------------------------------|
| 88.0631 <sup>+2</sup>  | y <sub>1</sub> <sup>+2</sup>                                 | 373.2194               | y <sub>3</sub>                                                | 591.3193 <sup>+2</sup> | b <sub>11</sub> <sup>+2</sup>                                 | 773.8687 <sup>+2</sup> | b <sub>14</sub> <sup>+2</sup>                   | 1238.6528 | y <sub>12</sub> -H <sub>3</sub> PO <sub>4</sub> |
| 135.5999 <sup>+2</sup> | b <sub>2</sub> <sup>+2</sup>                                 | 385.2194               | b <sub>3</sub>                                                | 595.2843 <sup>+2</sup> | y <sub>11</sub> <sup>+2</sup>                                 | 782.8740 <sup>+2</sup> | y <sub>14</sub> <sup>+2</sup>                   | 1250.6528 | b <sub>12</sub> -H <sub>3</sub> PO <sub>4</sub> |
| 138.5870 <sup>+2</sup> | y <sub>2</sub> <sup>+2</sup>                                 | 397.7114 <sup>+2</sup> | y <sub>8</sub> -H <sub>3</sub> PO <sub>4</sub> <sup>+2</sup>  | 610.3307               | y <sub>6</sub> -H <sub>3</sub> PO <sub>4</sub>                | 794.4155               | y <sub>8</sub> -H <sub>3</sub> PO <sub>4</sub>  | 1336.6297 | y <sub>12</sub>                                 |
| 175.119                | y <sub>1</sub>                                               | 403.1838 <sup>+2</sup> | y <sub>7</sub> <sup>+2</sup>                                  | 619.8300 <sup>+2</sup> | y <sub>12</sub> -H <sub>3</sub> PO <sub>4</sub> <sup>+2</sup> | 805.3604               | y <sub>7</sub>                                  | 1347.7056 | b <sub>13</sub> -H <sub>3</sub> PO <sub>4</sub> |
| 187.1133 <sup>+2</sup> | y <sub>3</sub> <sup>+2</sup>                                 | 415.2320 <sup>+2</sup> | b <sub>7</sub> <sup>+2</sup>                                  | 625.8300 <sup>+2</sup> | b <sub>12</sub> -H <sub>3</sub> PO <sub>4</sub> <sup>+2</sup> | 811.9361 <sup>+2</sup> | MH-H <sub>3</sub> PO <sub>4</sub> <sup>+2</sup> | 1348.6297 | b <sub>12</sub>                                 |
| 193.1133 <sup>+2</sup> | b <sub>3</sub> <sup>+2</sup>                                 | 442.2409               | y <sub>4</sub> -H <sub>3</sub> PO <sub>4</sub>                | 633.3355               | b <sub>5</sub>                                                | 829.4567               | b <sub>7</sub>                                  | 1353.6797 | y <sub>13</sub> -H <sub>3</sub> PO <sub>4</sub> |
| 221.6241 <sup>+2</sup> | y <sub>4</sub> -H <sub>3</sub> PO <sub>4</sub> <sup>+2</sup> | 446.6998 <sup>+2</sup> | y <sub>8</sub> <sup>+2</sup>                                  | 637.2705               | y <sub>5</sub>                                                | 860.9245 <sup>+2</sup> | MH <sup>+2</sup>                                | 1445.6825 | b <sub>13</sub>                                 |
| 266.6475 <sup>+2</sup> | b <sub>4</sub> <sup>+2</sup>                                 | 447.2456 <sup>+2</sup> | y <sub>9</sub> -H <sub>3</sub> PO <sub>4</sub> <sup>+2</sup>  | 668.8185 <sup>+2</sup> | y <sub>12</sub> <sup>+2</sup>                                 | 892.3924               | y <sub>8</sub>                                  | 1448.7532 | b <sub>14</sub> -H <sub>3</sub> PO <sub>4</sub> |
| 270.1504 <sup>+2</sup> | y <sub>5</sub> -H <sub>3</sub> PO <sub>4</sub> <sup>+2</sup> | 458.7480 <sup>+2</sup> | b <sub>8</sub> <sup>+2</sup>                                  | 674.3564 <sup>+2</sup> | b <sub>13</sub> -H <sub>3</sub> PO <sub>4</sub> <sup>+2</sup> | 893.4839               | y <sub>9</sub> -H <sub>3</sub> PO <sub>4</sub>  | 1451.6566 | y <sub>13</sub>                                 |
| 270.1925               | b <sub>2</sub>                                               | 495.7720 <sup>+2</sup> | y <sub>10</sub> -H <sub>3</sub> PO <sub>4</sub> <sup>+2</sup> | 674.8185 <sup>+2</sup> | b <sub>12</sub> <sup>+2</sup>                                 | 916.4887               | b <sub>8</sub>                                  | 1466.7638 | y <sub>14</sub> -H <sub>3</sub> PO <sub>4</sub> |
| 270.6125 <sup>+2</sup> | y <sub>4</sub> <sup>+2</sup>                                 | 496.2341 <sup>+2</sup> | y <sub>9</sub> <sup>+2</sup>                                  | 677.3435 <sup>+2</sup> | y <sub>13</sub> -H <sub>3</sub> PO <sub>4</sub> <sup>+2</sup> | 990.5367               | y <sub>10</sub> -H <sub>3</sub> PO <sub>4</sub> | 1546.7301 | b <sub>14</sub>                                 |
| 276.1666               | y <sub>2</sub>                                               | 507.2744 <sup>+2</sup> | b <sub>9</sub> <sup>+2</sup>                                  | 707.3835               | y <sub>7</sub> -H <sub>3</sub> PO <sub>4</sub>                | 991.4608               | y <sub>9</sub>                                  | 1564.7407 | y <sub>14</sub>                                 |
| 305.6690 <sup>+2</sup> | y <sub>6</sub> -H <sub>3</sub> PO <sub>4</sub> <sup>+2</sup> | 532.2878               | b <sub>4</sub>                                                | 708.3076               | y <sub>6</sub>                                                | 1013.5415              | b <sub>9</sub>                                  | 1622.8649 | MH-H <sub>3</sub> PO <sub>4</sub>               |
| 317.1714 <sup>+2</sup> | b <sub>5</sub> <sup>+2</sup>                                 | 539.2936               | y <sub>5</sub> -H <sub>3</sub> PO <sub>4</sub>                | 723.3449 <sup>+2</sup> | b <sub>13</sub> <sup>+2</sup>                                 | 1084.5786              | b <sub>10</sub>                                 | 1720.8418 | MH                                              |
| 319.1389 <sup>+2</sup> | y <sub>5</sub> <sup>+2</sup>                                 | 540.2178               | y <sub>4</sub>                                                | 724.8803 <sup>+2</sup> | b <sub>14</sub> -H <sub>3</sub> PO <sub>4</sub> <sup>+2</sup> | 1088.5136              | y <sub>10</sub>                                 |           |                                                 |
| 354.1954 <sup>+2</sup> | y <sub>7</sub> -H <sub>3</sub> PO <sub>4</sub> <sup>+2</sup> | 542.7929 <sup>+2</sup> | b <sub>10</sub> <sup>+2</sup>                                 | 726.3320 <sup>+2</sup> | y <sub>13</sub> <sup>+2</sup>                                 | 1091.5844              | y <sub>11</sub> -H <sub>3</sub> PO <sub>4</sub> |           |                                                 |
| 354.6575 <sup>+2</sup> | y <sub>6</sub> <sup>+2</sup>                                 | 544.7604 <sup>+2</sup> | y <sub>10</sub> <sup>+2</sup>                                 | 730.3883               | b <sub>6</sub>                                                | 1181.6313              | b <sub>11</sub>                                 |           |                                                 |
| 365.6978 <sup>+2</sup> | b <sub>6</sub> <sup>+2</sup>                                 | 546.2958 <sup>+2</sup> | y <sub>11</sub> -H <sub>3</sub> PO <sub>4</sub> <sup>+2</sup> | 733.8855 <sup>+2</sup> | y <sub>14</sub> -H <sub>3</sub> PO <sub>4</sub> <sup>+2</sup> | 1189.5613              | y <sub>11</sub>                                 |           |                                                 |

MS/MS Fragmentation of RIDFTPVsPAPSPTR  
 Found in IPI00749302, Hypothetical protein DKFZp686L20116

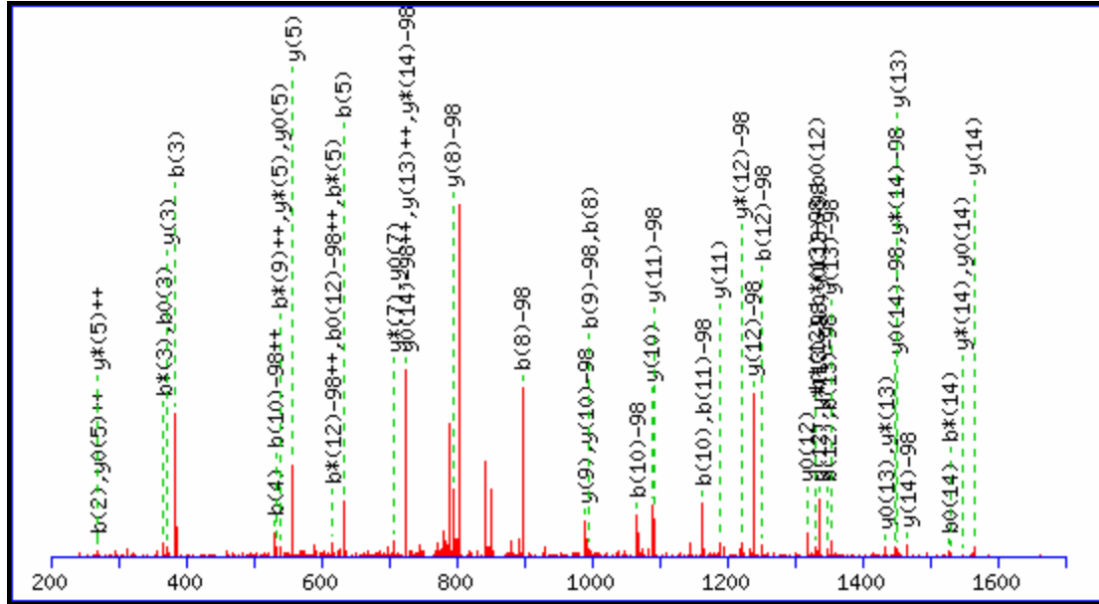

|                        |                                                              |                        |                                                               |                        |                                                               |                        |                                                 |           |                                                 |
|------------------------|--------------------------------------------------------------|------------------------|---------------------------------------------------------------|------------------------|---------------------------------------------------------------|------------------------|-------------------------------------------------|-----------|-------------------------------------------------|
| 88.0631 <sup>+2</sup>  | y <sub>1</sub> <sup>+2</sup>                                 | 415.2320 <sup>+2</sup> | b <sub>7</sub> <sup>+2</sup>                                  | 619.8300 <sup>+2</sup> | y <sub>12</sub> -H <sub>3</sub> PO <sub>4</sub> <sup>+2</sup> | 811.9361 <sup>+2</sup> | MH-H <sub>3</sub> PO <sub>4</sub> <sup>+2</sup> | 1250.6528 | b <sub>12</sub> -H <sub>3</sub> PO <sub>4</sub> |
| 135.5999 <sup>+2</sup> | b <sub>2</sub> <sup>+2</sup>                                 | 446.6998 <sup>+2</sup> | y <sub>8</sub> <sup>+2</sup>                                  | 625.8300 <sup>+2</sup> | b <sub>12</sub> -H <sub>3</sub> PO <sub>4</sub> <sup>+2</sup> | 829.4567               | b <sub>7</sub>                                  | 1261.5977 | b <sub>11</sub>                                 |
| 138.5870 <sup>+2</sup> | y <sub>2</sub> <sup>+2</sup>                                 | 447.2456 <sup>+2</sup> | y <sub>9</sub> -H <sub>3</sub> PO <sub>4</sub> <sup>+2</sup>  | 628.3413               | y <sub>6</sub>                                                | 860.9245 <sup>+2</sup> | MH <sup>+2</sup>                                | 1336.6297 | y <sub>12</sub>                                 |
| 175.119                | y <sub>1</sub>                                               | 449.7427 <sup>+2</sup> | b <sub>8</sub> -H <sub>3</sub> PO <sub>4</sub> <sup>+2</sup>  | 631.3025 <sup>+2</sup> | b <sub>11</sub> <sup>+2</sup>                                 | 892.3924               | y <sub>8</sub>                                  | 1347.7056 | b <sub>13</sub> -H <sub>3</sub> PO <sub>4</sub> |
| 187.1133 <sup>+2</sup> | y <sub>3</sub> <sup>+2</sup>                                 | 460.2514               | y <sub>4</sub>                                                | 633.3355               | b <sub>5</sub>                                                | 893.4839               | y <sub>9</sub> -H <sub>3</sub> PO <sub>4</sub>  | 1348.6297 | b <sub>12</sub>                                 |
| 193.1133 <sup>+2</sup> | b <sub>3</sub> <sup>+2</sup>                                 | 495.7720 <sup>+2</sup> | y <sub>10</sub> -H <sub>3</sub> PO <sub>4</sub> <sup>+2</sup> | 668.8185 <sup>+2</sup> | y <sub>12</sub> <sup>+2</sup>                                 | 898.4781               | b <sub>8</sub> -H <sub>3</sub> PO <sub>4</sub>  | 1353.6797 | y <sub>13</sub> -H <sub>3</sub> PO <sub>4</sub> |
| 230.6293 <sup>+2</sup> | y <sub>4</sub> <sup>+2</sup>                                 | 496.2341 <sup>+2</sup> | y <sub>9</sub> <sup>+2</sup>                                  | 674.3564 <sup>+2</sup> | b <sub>13</sub> -H <sub>3</sub> PO <sub>4</sub> <sup>+2</sup> | 990.5367               | y <sub>10</sub> -H <sub>3</sub> PO <sub>4</sub> | 1445.6825 | b <sub>13</sub>                                 |
| 266.6475 <sup>+2</sup> | b <sub>4</sub> <sup>+2</sup>                                 | 498.2691 <sup>+2</sup> | b <sub>9</sub> -H <sub>3</sub> PO <sub>4</sub> <sup>+2</sup>  | 674.8185 <sup>+2</sup> | b <sub>12</sub> <sup>+2</sup>                                 | 991.4608               | y <sub>9</sub>                                  | 1448.7532 | b <sub>14</sub> -H <sub>3</sub> PO <sub>4</sub> |
| 270.1925               | b <sub>2</sub>                                               | 498.7311 <sup>+2</sup> | b <sub>8</sub> <sup>+2</sup>                                  | 677.3435 <sup>+2</sup> | y <sub>13</sub> -H <sub>3</sub> PO <sub>4</sub> <sup>+2</sup> | 995.5309               | b <sub>9</sub> -H <sub>3</sub> PO <sub>4</sub>  | 1451.6566 | y <sub>13</sub>                                 |
| 276.1666               | y <sub>2</sub>                                               | 532.2878               | b <sub>4</sub>                                                | 723.3449 <sup>+2</sup> | b <sub>13</sub> <sup>+2</sup>                                 | 996.455                | b <sub>8</sub>                                  | 1466.7638 | y <sub>14</sub> -H <sub>3</sub> PO <sub>4</sub> |
| 279.1557 <sup>+2</sup> | y <sub>5</sub> <sup>+2</sup>                                 | 533.7876 <sup>+2</sup> | b <sub>10</sub> -H <sub>3</sub> PO <sub>4</sub> <sup>+2</sup> | 724.8803 <sup>+2</sup> | b <sub>14</sub> -H <sub>3</sub> PO <sub>4</sub> <sup>+2</sup> | 1066.568               | b <sub>10</sub> -H <sub>3</sub> PO <sub>4</sub> | 1546.7301 | b <sub>14</sub>                                 |
| 314.6743 <sup>+2</sup> | y <sub>6</sub> <sup>+2</sup>                                 | 544.7604 <sup>+2</sup> | y <sub>10</sub> <sup>+2</sup>                                 | 725.3941               | y <sub>7</sub>                                                | 1088.5136              | y <sub>10</sub>                                 | 1564.7407 | y <sub>14</sub>                                 |
| 317.1714 <sup>+2</sup> | b <sub>5</sub> <sup>+2</sup>                                 | 546.2958 <sup>+2</sup> | y <sub>11</sub> -H <sub>3</sub> PO <sub>4</sub> <sup>+2</sup> | 726.3320 <sup>+2</sup> | y <sub>13</sub> <sup>+2</sup>                                 | 1091.5844              | y <sub>11</sub> -H <sub>3</sub> PO <sub>4</sub> | 1622.8649 | MH-H <sub>3</sub> PO <sub>4</sub>               |
| 363.2007 <sup>+2</sup> | y <sub>7</sub> <sup>+2</sup>                                 | 547.2575 <sup>+2</sup> | b <sub>9</sub> <sup>+2</sup>                                  | 730.3883               | b <sub>6</sub>                                                | 1093.5078              | b <sub>9</sub>                                  | 1720.8418 | MH                                              |
| 365.6978 <sup>+2</sup> | b <sub>6</sub> <sup>+2</sup>                                 | 557.3042               | y <sub>5</sub>                                                | 733.8855 <sup>+2</sup> | y <sub>14</sub> -H <sub>3</sub> PO <sub>4</sub> <sup>+2</sup> | 1163.6208              | b <sub>11</sub> -H <sub>3</sub> PO <sub>4</sub> |           |                                                 |
| 373.2194               | y <sub>3</sub>                                               | 582.3140 <sup>+2</sup> | b <sub>11</sub> -H <sub>3</sub> PO <sub>4</sub> <sup>+2</sup> | 773.8687 <sup>+2</sup> | b <sub>14</sub> <sup>+2</sup>                                 | 1164.5449              | b <sub>10</sub>                                 |           |                                                 |
| 385.2194               | b <sub>3</sub>                                               | 582.7761 <sup>+2</sup> | b <sub>10</sub> <sup>+2</sup>                                 | 782.8740 <sup>+2</sup> | y <sub>14</sub> <sup>+2</sup>                                 | 1189.5613              | y <sub>11</sub>                                 |           |                                                 |
| 397.7114 <sup>+2</sup> | y <sub>8</sub> -H <sub>3</sub> PO <sub>4</sub> <sup>+2</sup> | 595.2843 <sup>+2</sup> | y <sub>11</sub> <sup>+2</sup>                                 | 794.4155               | y <sub>8</sub> -H <sub>3</sub> PO <sub>4</sub>                | 1238.6528              | y <sub>12</sub> -H <sub>3</sub> PO <sub>4</sub> |           |                                                 |

MS/MS Fragmentation of RIDFTPVSPAPSPtRGFGK  
 Found in IPI00749302, Hypothetical protein DKFZp686L20116

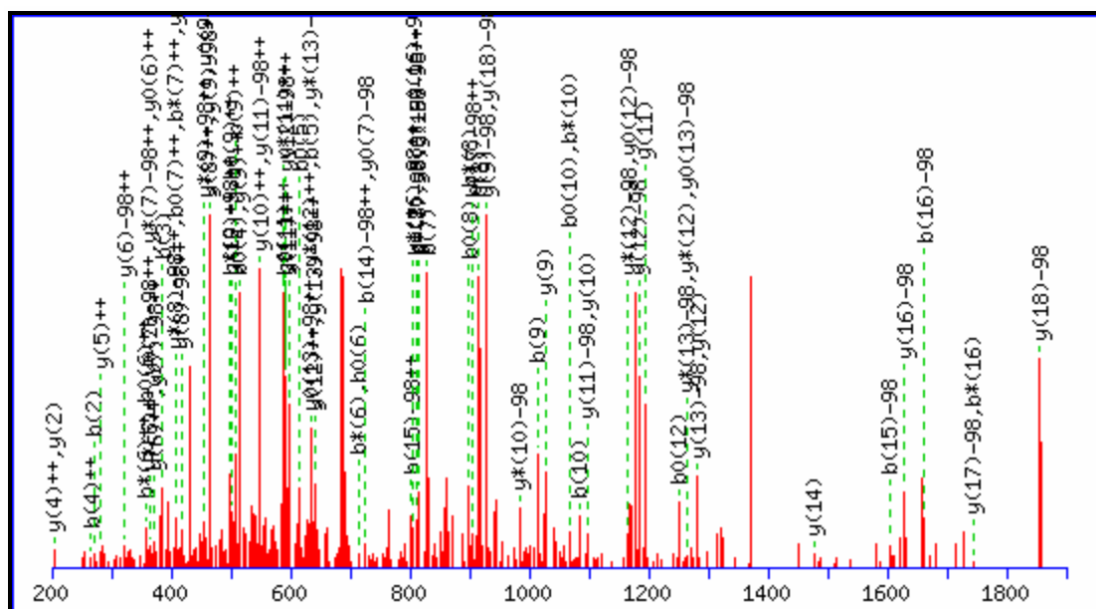

|                        |                                                              |                        |                                                               |                        |                                                               |                         |                                                               |           |                                                 |
|------------------------|--------------------------------------------------------------|------------------------|---------------------------------------------------------------|------------------------|---------------------------------------------------------------|-------------------------|---------------------------------------------------------------|-----------|-------------------------------------------------|
| 74.0600 <sup>+2</sup>  | y <sub>1</sub> <sup>+2</sup>                                 | 458.7480 <sup>+2</sup> | b <sub>8</sub> <sup>+2</sup>                                  | 724.8803 <sup>+2</sup> | b <sub>14</sub> -H <sub>3</sub> PO <sub>4</sub> <sup>+2</sup> | 928.4999                | y <sub>9</sub> -H <sub>3</sub> PO <sub>4</sub>                | 1380.6671 | y <sub>13</sub>                                 |
| 102.5708 <sup>+2</sup> | y <sub>2</sub> <sup>+2</sup>                                 | 464.7536 <sup>+2</sup> | y <sub>9</sub> -H <sub>3</sub> PO <sub>4</sub> <sup>+2</sup>  | 730.3883               | b <sub>6</sub>                                                | 929.4241                | y <sub>8</sub>                                                | 1448.7532 | b <sub>14</sub> -H <sub>3</sub> PO <sub>4</sub> |
| 135.5999 <sup>+2</sup> | b <sub>2</sub> <sup>+2</sup>                                 | 465.2157 <sup>+2</sup> | y <sub>8</sub> <sup>+2</sup>                                  | 739.3636 <sup>+2</sup> | y <sub>14</sub> <sup>+2</sup>                                 | 933.4865 <sup>+2</sup>  | b <sub>18</sub> -H <sub>3</sub> PO <sub>4</sub> <sup>+2</sup> | 1477.7199 | y <sub>14</sub>                                 |
| 147.1128               | y <sub>1</sub>                                               | 500.2722 <sup>+2</sup> | y <sub>10</sub> -H <sub>3</sub> PO <sub>4</sub> <sup>+2</sup> | 740.8990 <sup>+2</sup> | y <sub>15</sub> -H <sub>3</sub> PO <sub>4</sub> <sup>+2</sup> | 953.9642 <sup>+2</sup>  | b <sub>17</sub> <sup>+2</sup>                                 | 1480.7907 | y <sub>15</sub> -H <sub>3</sub> PO <sub>4</sub> |
| 176.1050 <sup>+2</sup> | y <sub>3</sub> <sup>+2</sup>                                 | 507.2744 <sup>+2</sup> | b <sub>9</sub> <sup>+2</sup>                                  | 744.4151               | y <sub>7</sub> -H <sub>3</sub> PO <sub>4</sub>                | 977.4771 <sup>+2</sup>  | y <sub>18</sub> <sup>+2</sup>                                 | 1546.7301 | b <sub>14</sub>                                 |
| 193.1133 <sup>+2</sup> | b <sub>3</sub> <sup>+2</sup>                                 | 513.7420 <sup>+2</sup> | y <sub>9</sub> <sup>+2</sup>                                  | 745.3393               | y <sub>6</sub>                                                | 982.4749 <sup>+2</sup>  | b <sub>18</sub> <sup>+2</sup>                                 | 1578.7676 | y <sub>15</sub>                                 |
| 204.1343               | y <sub>2</sub>                                               | 532.2878               | b <sub>4</sub>                                                | 773.8687 <sup>+2</sup> | b <sub>14</sub> <sup>+2</sup>                                 | 999.537                 | y <sub>10</sub> -H <sub>3</sub> PO <sub>4</sub>               | 1604.8544 | b <sub>15</sub> -H <sub>3</sub> PO <sub>4</sub> |
| 204.6157 <sup>+2</sup> | y <sub>4</sub> <sup>+2</sup>                                 | 542.7929 <sup>+2</sup> | b <sub>10</sub> <sup>+2</sup>                                 | 789.8874 <sup>+2</sup> | y <sub>15</sub> <sup>+2</sup>                                 | 1006.5392 <sup>+2</sup> | MH-H <sub>3</sub> PO <sub>4</sub> <sup>+2</sup>               | 1627.8591 | y <sub>16</sub> -H <sub>3</sub> PO <sub>4</sub> |
| 266.6475 <sup>+2</sup> | b <sub>4</sub> <sup>+2</sup>                                 | 548.7985 <sup>+2</sup> | y <sub>11</sub> -H <sub>3</sub> PO <sub>4</sub> <sup>+2</sup> | 802.9308 <sup>+2</sup> | b <sub>15</sub> -H <sub>3</sub> PO <sub>4</sub> <sup>+2</sup> | 1013.5415               | b <sub>9</sub>                                                | 1661.8758 | b <sub>16</sub> -H <sub>3</sub> PO <sub>4</sub> |
| 270.1925               | b <sub>2</sub>                                               | 549.2606 <sup>+2</sup> | y <sub>10</sub> <sup>+2</sup>                                 | 814.4332 <sup>+2</sup> | y <sub>16</sub> -H <sub>3</sub> PO <sub>4</sub> <sup>+2</sup> | 1026.4768               | y <sub>9</sub>                                                | 1702.8312 | b <sub>15</sub>                                 |
| 282.6663 <sup>+2</sup> | y <sub>5</sub> <sup>+2</sup>                                 | 564.3253               | y <sub>5</sub>                                                | 829.4567               | b <sub>7</sub>                                                | 1055.5277 <sup>+2</sup> | MH <sup>+2</sup>                                              | 1725.836  | y <sub>16</sub>                                 |
| 317.1714 <sup>+2</sup> | b <sub>5</sub> <sup>+2</sup>                                 | 591.3193 <sup>+2</sup> | b <sub>11</sub> <sup>+2</sup>                                 | 831.4415 <sup>+2</sup> | b <sub>16</sub> -H <sub>3</sub> PO <sub>4</sub> <sup>+2</sup> | 1084.5786               | b <sub>10</sub>                                               | 1742.886  | y <sub>17</sub> -H <sub>3</sub> PO <sub>4</sub> |
| 324.1848 <sup>+2</sup> | y <sub>6</sub> -H <sub>3</sub> PO <sub>4</sub> <sup>+2</sup> | 592.3146 <sup>+2</sup> | y <sub>12</sub> -H <sub>3</sub> PO <sub>4</sub> <sup>+2</sup> | 831.4472               | y <sub>8</sub> -H <sub>3</sub> PO <sub>4</sub>                | 1096.5898               | y <sub>11</sub> -H <sub>3</sub> PO <sub>4</sub>               | 1759.8527 | b <sub>16</sub>                                 |
| 351.2027               | y <sub>3</sub>                                               | 597.7870 <sup>+2</sup> | y <sub>11</sub> <sup>+2</sup>                                 | 842.392                | y <sub>7</sub>                                                | 1097.5139               | y <sub>10</sub>                                               | 1808.9442 | b <sub>17</sub> -H <sub>3</sub> PO <sub>4</sub> |
| 365.6978 <sup>+2</sup> | b <sub>6</sub> <sup>+2</sup>                                 | 633.3355               | b <sub>5</sub>                                                | 851.9193 <sup>+2</sup> | b <sub>15</sub> <sup>+2</sup>                                 | 1181.6313               | b <sub>11</sub>                                               | 1840.8629 | y <sub>17</sub>                                 |
| 372.7112 <sup>+2</sup> | y <sub>7</sub> -H <sub>3</sub> PO <sub>4</sub> <sup>+2</sup> | 634.8353 <sup>+2</sup> | b <sub>12</sub> <sup>+2</sup>                                 | 863.4216 <sup>+2</sup> | y <sub>16</sub> <sup>+2</sup>                                 | 1183.6218               | y <sub>12</sub> -H <sub>3</sub> PO <sub>4</sub>               | 1855.9701 | y <sub>18</sub> -H <sub>3</sub> PO <sub>4</sub> |
| 373.1733 <sup>+2</sup> | y <sub>6</sub> <sup>+2</sup>                                 | 641.3030 <sup>+2</sup> | y <sub>12</sub> <sup>+2</sup>                                 | 871.9467 <sup>+2</sup> | y <sub>17</sub> -H <sub>3</sub> PO <sub>4</sub> <sup>+2</sup> | 1194.5667               | y <sub>11</sub>                                               | 1865.9657 | b <sub>18</sub> -H <sub>3</sub> PO <sub>4</sub> |
| 385.2194               | b <sub>3</sub>                                               | 641.8488 <sup>+2</sup> | y <sub>13</sub> -H <sub>3</sub> PO <sub>4</sub> <sup>+2</sup> | 880.4300 <sup>+2</sup> | b <sub>16</sub> <sup>+2</sup>                                 | 1268.6634               | b <sub>12</sub>                                               | 1906.9211 | b <sub>17</sub>                                 |
| 408.2241               | y <sub>4</sub>                                               | 647.3624               | y <sub>6</sub> -H <sub>3</sub> PO <sub>4</sub>                | 904.9758 <sup>+2</sup> | b <sub>17</sub> -H <sub>3</sub> PO <sub>4</sub> <sup>+2</sup> | 1281.5987               | y <sub>12</sub>                                               | 1953.947  | y <sub>18</sub>                                 |
| 415.2320 <sup>+2</sup> | b <sub>7</sub> <sup>+2</sup>                                 | 683.3617 <sup>+2</sup> | b <sub>13</sub> <sup>+2</sup>                                 | 916.4887               | b <sub>8</sub>                                                | 1282.6902               | y <sub>13</sub> -H <sub>3</sub> PO <sub>4</sub>               | 1963.9426 | b <sub>18</sub>                                 |
| 416.2272 <sup>+2</sup> | y <sub>8</sub> -H <sub>3</sub> PO <sub>4</sub> <sup>+2</sup> | 690.3751 <sup>+2</sup> | y <sub>14</sub> -H <sub>3</sub> PO <sub>4</sub> <sup>+2</sup> | 920.9351 <sup>+2</sup> | y <sub>17</sub> <sup>+2</sup>                                 | 1365.7161               | b <sub>13</sub>                                               | 2012.0712 | MH-H <sub>3</sub> PO <sub>4</sub>               |
| 421.6997 <sup>+2</sup> | y <sub>7</sub> <sup>+2</sup>                                 | 690.8372 <sup>+2</sup> | y <sub>13</sub> <sup>+2</sup>                                 | 928.4887 <sup>+2</sup> | y <sub>18</sub> -H <sub>3</sub> PO <sub>4</sub> <sup>+2</sup> | 1379.743                | y <sub>14</sub> -H <sub>3</sub> PO <sub>4</sub>               | 2110.0481 | MH                                              |

MS/MS Fragmentation of RIDFTPVsPAPSPtRGFGK  
 Found in IPI00749302, Hypothetical protein DKFZp686L20116

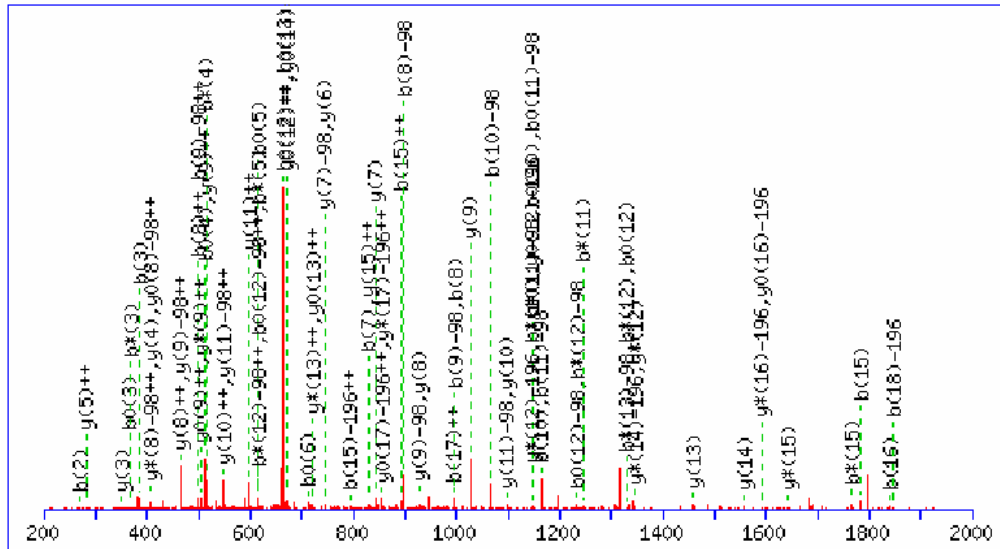

|                        |                                                               |                        |                                                                |                        |                                                                |                         |                                                  |           |                                                  |
|------------------------|---------------------------------------------------------------|------------------------|----------------------------------------------------------------|------------------------|----------------------------------------------------------------|-------------------------|--------------------------------------------------|-----------|--------------------------------------------------|
| 74.0600 <sup>+2</sup>  | y <sub>1</sub> <sup>+2</sup>                                  | 533.7876 <sup>+2</sup> | b <sub>10</sub> -H <sub>3</sub> PO <sub>4</sub> <sup>+2</sup>  | 780.8821 <sup>+2</sup> | y <sub>15</sub> -H <sub>3</sub> PO <sub>4</sub> <sup>+2</sup>  | 999.537                 | y <sub>10</sub> -H <sub>3</sub> PO <sub>4</sub>  | 1560.757  | y <sub>15</sub> -H <sub>3</sub> PO <sub>4</sub>  |
| 102.5708 <sup>+2</sup> | y <sub>2</sub> <sup>+2</sup>                                  | 547.2575 <sup>+2</sup> | b <sub>9</sub> <sup>+2</sup>                                   | 793.9255 <sup>+2</sup> | b <sub>15</sub> -2H <sub>3</sub> PO <sub>4</sub> <sup>+2</sup> | 1017.4603 <sup>+2</sup> | y <sub>18</sub> <sup>+2</sup>                    | 1586.8438 | b <sub>15</sub> -2H <sub>3</sub> PO <sub>4</sub> |
| 135.5999 <sup>+2</sup> | b <sub>2</sub> <sup>+2</sup>                                  | 548.7985 <sup>+2</sup> | y <sub>11</sub> -H <sub>3</sub> PO <sub>4</sub> <sup>+2</sup>  | 805.4279 <sup>+2</sup> | y <sub>16</sub> -2H <sub>3</sub> PO <sub>4</sub> <sup>+2</sup> | 1022.4581 <sup>+2</sup> | b <sub>18</sub> <sup>+2</sup>                    | 1609.8485 | y <sub>16</sub> -2H <sub>3</sub> PO <sub>4</sub> |
| 147.1128               | y <sub>1</sub>                                                | 549.2606 <sup>+2</sup> | y <sub>10</sub> <sup>+2</sup>                                  | 813.8519 <sup>+2</sup> | b <sub>14</sub> <sup>+2</sup>                                  | 1026.4768               | y <sub>9</sub>                                   | 1626.6965 | b <sub>14</sub>                                  |
| 176.1050 <sup>+2</sup> | y <sub>3</sub> <sup>+2</sup>                                  | 564.3253               | y <sub>5</sub>                                                 | 822.4363 <sup>+2</sup> | b <sub>16</sub> -2H <sub>3</sub> PO <sub>4</sub> <sup>+2</sup> | 1046.5224 <sup>+2</sup> | MH-H <sub>3</sub> PO <sub>4</sub> <sup>+2</sup>  | 1643.8653 | b <sub>16</sub> -2H <sub>3</sub> PO <sub>4</sub> |
| 193.1133 <sup>+2</sup> | b <sub>3</sub> <sup>+2</sup>                                  | 582.3140 <sup>+2</sup> | b <sub>11</sub> -H <sub>3</sub> PO <sub>4</sub> <sup>+2</sup>  | 829.4567               | b <sub>7</sub>                                                 | 1066.568                | b <sub>10</sub> -H <sub>3</sub> PO <sub>4</sub>  | 1658.7339 | y <sub>15</sub>                                  |
| 204.1343               | y <sub>2</sub>                                                | 582.7761 <sup>+2</sup> | b <sub>10</sub> <sup>+2</sup>                                  | 829.8706 <sup>+2</sup> | y <sub>15</sub> <sup>+2</sup>                                  | 1093.5078               | b <sub>9</sub>                                   | 1684.8207 | b <sub>15</sub> -H <sub>3</sub> PO <sub>4</sub>  |
| 204.6157 <sup>+2</sup> | y <sub>4</sub> <sup>+2</sup>                                  | 583.3093 <sup>+2</sup> | y <sub>12</sub> -2H <sub>3</sub> PO <sub>4</sub> <sup>+2</sup> | 831.4472               | y <sub>8</sub> -H <sub>3</sub> PO <sub>4</sub>                 | 1095.5109 <sup>+2</sup> | MH <sup>+2</sup>                                 | 1707.8254 | y <sub>16</sub> -H <sub>3</sub> PO <sub>4</sub>  |
| 266.6475 <sup>+2</sup> | b <sub>4</sub> <sup>+2</sup>                                  | 597.7870 <sup>+2</sup> | y <sub>11</sub> <sup>+2</sup>                                  | 842.392                | y <sub>7</sub>                                                 | 1096.5898               | y <sub>11</sub> -H <sub>3</sub> PO <sub>4</sub>  | 1724.8755 | y <sub>17</sub> -2H <sub>3</sub> PO <sub>4</sub> |
| 270.1925               | b <sub>2</sub>                                                | 625.8300 <sup>+2</sup> | b <sub>12</sub> -H <sub>3</sub> PO <sub>4</sub> <sup>+2</sup>  | 842.9140 <sup>+2</sup> | b <sub>15</sub> -H <sub>3</sub> PO <sub>4</sub> <sup>+2</sup>  | 1097.5139               | y <sub>10</sub>                                  | 1741.8421 | b <sub>16</sub> -H <sub>3</sub> PO <sub>4</sub>  |
| 282.6663 <sup>+2</sup> | y <sub>5</sub> <sup>+2</sup>                                  | 631.3025 <sup>+2</sup> | b <sub>11</sub> <sup>+2</sup>                                  | 854.4164 <sup>+2</sup> | y <sub>16</sub> -H <sub>3</sub> PO <sub>4</sub> <sup>+2</sup>  | 1163.6208               | b <sub>11</sub> -H <sub>3</sub> PO <sub>4</sub>  | 1782.7976 | b <sub>15</sub>                                  |
| 317.1714 <sup>+2</sup> | b <sub>5</sub> <sup>+2</sup>                                  | 632.2977 <sup>+2</sup> | y <sub>12</sub> -H <sub>3</sub> PO <sub>4</sub> <sup>+2</sup>  | 862.9414 <sup>+2</sup> | y <sub>17</sub> -2H <sub>3</sub> PO <sub>4</sub> <sup>+2</sup> | 1164.5449               | b <sub>10</sub>                                  | 1790.9337 | b <sub>17</sub> -2H <sub>3</sub> PO <sub>4</sub> |
| 324.1848 <sup>+2</sup> | y <sub>6</sub> -H <sub>3</sub> PO <sub>4</sub> <sup>+2</sup>  | 632.8435 <sup>+2</sup> | y <sub>13</sub> -2H <sub>3</sub> PO <sub>4</sub> <sup>+2</sup> | 871.4247 <sup>+2</sup> | b <sub>16</sub> -H <sub>3</sub> PO <sub>4</sub> <sup>+2</sup>  | 1165.6113               | y <sub>12</sub> -2H <sub>3</sub> PO <sub>4</sub> | 1805.8023 | y <sub>16</sub>                                  |
| 351.2027               | y <sub>3</sub>                                                | 633.3355               | b <sub>5</sub>                                                 | 891.9024 <sup>+2</sup> | b <sub>15</sub> <sup>+2</sup>                                  | 1194.5667               | y <sub>11</sub>                                  | 1822.8524 | y <sub>17</sub> -H <sub>3</sub> PO <sub>4</sub>  |
| 365.6978 <sup>+2</sup> | b <sub>6</sub> <sup>+2</sup>                                  | 647.3624               | y <sub>6</sub> -H <sub>3</sub> PO <sub>4</sub>                 | 895.9705 <sup>+2</sup> | b <sub>17</sub> -2H <sub>3</sub> PO <sub>4</sub> <sup>+2</sup> | 1250.6528               | b <sub>12</sub> -H <sub>3</sub> PO <sub>4</sub>  | 1837.9595 | y <sub>18</sub> -2H <sub>3</sub> PO <sub>4</sub> |
| 372.7112 <sup>+2</sup> | y <sub>7</sub> -H <sub>3</sub> PO <sub>4</sub> <sup>+2</sup>  | 674.3564 <sup>+2</sup> | b <sub>13</sub> -H <sub>3</sub> PO <sub>4</sub> <sup>+2</sup>  | 898.4781               | b <sub>8</sub> -H <sub>3</sub> PO <sub>4</sub>                 | 1261.5977               | b <sub>11</sub>                                  | 1839.819  | b <sub>16</sub>                                  |
| 373.1733 <sup>+2</sup> | y <sub>6</sub> <sup>+2</sup>                                  | 674.8185 <sup>+2</sup> | b <sub>12</sub> <sup>+2</sup>                                  | 903.4048 <sup>+2</sup> | y <sub>16</sub> <sup>+2</sup>                                  | 1263.5882               | y <sub>12</sub> -H <sub>3</sub> PO <sub>4</sub>  | 1847.9551 | b <sub>18</sub> -2H <sub>3</sub> PO <sub>4</sub> |
| 385.2194               | b <sub>3</sub>                                                | 681.2862 <sup>+2</sup> | y <sub>12</sub> <sup>+2</sup>                                  | 911.9298 <sup>+2</sup> | y <sub>17</sub> -H <sub>3</sub> PO <sub>4</sub> <sup>+2</sup>  | 1264.6797               | y <sub>13</sub> -2H <sub>3</sub> PO <sub>4</sub> | 1888.9106 | b <sub>17</sub> -H <sub>3</sub> PO <sub>4</sub>  |
| 408.2241               | y <sub>4</sub>                                                | 681.3699 <sup>+2</sup> | y <sub>14</sub> -2H <sub>3</sub> PO <sub>4</sub> <sup>+2</sup> | 919.4834 <sup>+2</sup> | y <sub>18</sub> -2H <sub>3</sub> PO <sub>4</sub> <sup>+2</sup> | 1347.7056               | b <sub>13</sub> -H <sub>3</sub> PO <sub>4</sub>  | 1920.8293 | y <sub>17</sub>                                  |
| 415.2320 <sup>+2</sup> | b <sub>7</sub> <sup>+2</sup>                                  | 681.8319 <sup>+2</sup> | y <sub>13</sub> -H <sub>3</sub> PO <sub>4</sub> <sup>+2</sup>  | 920.4132 <sup>+2</sup> | b <sub>16</sub> <sup>+2</sup>                                  | 1348.6297               | b <sub>12</sub>                                  | 1935.9364 | y <sub>18</sub> -H <sub>3</sub> PO <sub>4</sub>  |
| 416.2272 <sup>+2</sup> | y <sub>8</sub> -H <sub>3</sub> PO <sub>4</sub> <sup>+2</sup>  | 715.8750 <sup>+2</sup> | b <sub>14</sub> -2H <sub>3</sub> PO <sub>4</sub> <sup>+2</sup> | 924.4812 <sup>+2</sup> | b <sub>18</sub> -2H <sub>3</sub> PO <sub>4</sub> <sup>+2</sup> | 1361.5651               | y <sub>12</sub>                                  | 1945.932  | b <sub>18</sub> -H <sub>3</sub> PO <sub>4</sub>  |
| 421.6997 <sup>+2</sup> | y <sub>7</sub> <sup>+2</sup>                                  | 723.3449 <sup>+2</sup> | b <sub>13</sub> <sup>+2</sup>                                  | 928.4999               | y <sub>9</sub> -H <sub>3</sub> PO <sub>4</sub>                 | 1361.7324               | y <sub>14</sub> -2H <sub>3</sub> PO <sub>4</sub> | 1986.8875 | b <sub>17</sub>                                  |
| 449.7427 <sup>+2</sup> | b <sub>8</sub> -H <sub>3</sub> PO <sub>4</sub> <sup>+2</sup>  | 730.3583 <sup>+2</sup> | y <sub>14</sub> -H <sub>3</sub> PO <sub>4</sub> <sup>+2</sup>  | 929.4241               | y <sub>8</sub>                                                 | 1362.6566               | y <sub>13</sub> -H <sub>3</sub> PO <sub>4</sub>  | 2033.9133 | y <sub>18</sub>                                  |
| 464.7536 <sup>+2</sup> | y <sub>9</sub> -H <sub>3</sub> PO <sub>4</sub> <sup>+2</sup>  | 730.3883               | b <sub>6</sub>                                                 | 944.9589 <sup>+2</sup> | b <sub>17</sub> -H <sub>3</sub> PO <sub>4</sub> <sup>+2</sup>  | 1430.7427               | b <sub>14</sub> -2H <sub>3</sub> PO <sub>4</sub> | 2043.9089 | b <sub>18</sub>                                  |
| 465.2157 <sup>+2</sup> | y <sub>8</sub> <sup>+2</sup>                                  | 730.8204 <sup>+2</sup> | y <sub>13</sub> <sup>+2</sup>                                  | 960.9183 <sup>+2</sup> | y <sub>17</sub> <sup>+2</sup>                                  | 1445.6825               | b <sub>13</sub>                                  | 2092.0376 | MH-H <sub>3</sub> PO <sub>4</sub>                |
| 498.2691 <sup>+2</sup> | b <sub>9</sub> -H <sub>3</sub> PO <sub>4</sub> <sup>+2</sup>  | 731.8937 <sup>+2</sup> | y <sub>15</sub> -2H <sub>3</sub> PO <sub>4</sub> <sup>+2</sup> | 968.4719 <sup>+2</sup> | y <sub>18</sub> -H <sub>3</sub> PO <sub>4</sub> <sup>+2</sup>  | 1459.7093               | y <sub>14</sub> -H <sub>3</sub> PO <sub>4</sub>  | 2190.0144 | MH                                               |
| 498.7311 <sup>+2</sup> | b <sub>8</sub> <sup>+2</sup>                                  | 744.4151               | y <sub>7</sub> -H <sub>3</sub> PO <sub>4</sub>                 | 973.4696 <sup>+2</sup> | b <sub>18</sub> -H <sub>3</sub> PO <sub>4</sub> <sup>+2</sup>  | 1460.6335               | y <sub>13</sub>                                  |           |                                                  |
| 500.2722 <sup>+2</sup> | y <sub>10</sub> -H <sub>3</sub> PO <sub>4</sub> <sup>+2</sup> | 745.3393               | y <sub>6</sub>                                                 | 993.9474 <sup>+2</sup> | b <sub>17</sub> <sup>+2</sup>                                  | 1462.7801               | y <sub>15</sub> -2H <sub>3</sub> PO <sub>4</sub> |           |                                                  |
| 513.7420 <sup>+2</sup> | y <sub>9</sub> <sup>+2</sup>                                  | 764.8634 <sup>+2</sup> | b <sub>14</sub> -H <sub>3</sub> PO <sub>4</sub> <sup>+2</sup>  | 995.5309               | b <sub>9</sub> -H <sub>3</sub> PO <sub>4</sub>                 | 1528.7196               | b <sub>14</sub> -H <sub>3</sub> PO <sub>4</sub>  |           |                                                  |
| 532.2878               | b <sub>4</sub>                                                | 779.3468 <sup>+2</sup> | y <sub>14</sub> <sup>+2</sup>                                  | 996.455                | b <sub>8</sub>                                                 | 1557.6862               | y <sub>14</sub>                                  |           |                                                  |

MS/MS Fragmentation of AQTDSLGTSGSLQSK  
 Found in IPI00293009, Isoform 1 of Rab GTPase-binding effector protein 1

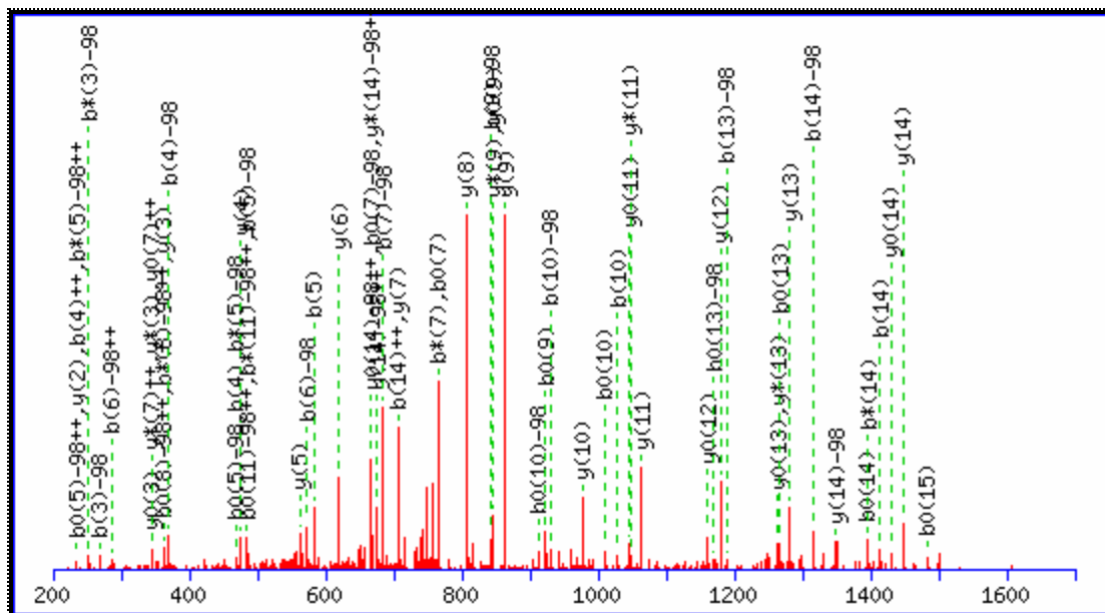

|                        |                                                |                        |                                                |                        |                                                               |           |                                                 |           |                                                 |
|------------------------|------------------------------------------------|------------------------|------------------------------------------------|------------------------|---------------------------------------------------------------|-----------|-------------------------------------------------|-----------|-------------------------------------------------|
| 74.0600 <sup>+2</sup>  | y <sub>1</sub> <sup>+2</sup>                   | 370.1721               | b <sub>4</sub> -H <sub>3</sub> PO <sub>4</sub> | 640.8201 <sup>+2</sup> | y <sub>13</sub> <sup>+2</sup>                                 | 840.3135  | b <sub>8</sub>                                  | 1187.5539 | b <sub>13</sub> -H <sub>3</sub> PO <sub>4</sub> |
| 117.5761 <sup>+2</sup> | y <sub>2</sub> <sup>+2</sup>                   | 404.2140 <sup>+2</sup> | y <sub>8</sub> <sup>+2</sup>                   | 670.208                | b <sub>6</sub>                                                | 843.3843  | b <sub>9</sub> -H <sub>3</sub> PO <sub>4</sub>  | 1280.6329 | y <sub>13</sub>                                 |
| 147.1128               | y <sub>1</sub>                                 | 432.7247 <sup>+2</sup> | y <sub>9</sub> <sup>+2</sup>                   | 675.3308 <sup>+2</sup> | y <sub>14</sub> -H <sub>3</sub> PO <sub>4</sub> <sup>+2</sup> | 864.4421  | y <sub>9</sub>                                  | 1285.5308 | b <sub>13</sub>                                 |
| 181.6053 <sup>+2</sup> | y <sub>3</sub> <sup>+2</sup>                   | 468.149                | b <sub>4</sub>                                 | 685.3151               | b <sub>7</sub> -H <sub>3</sub> PO <sub>4</sub>                | 930.4163  | b <sub>10</sub> -H <sub>3</sub> PO <sub>4</sub> | 1315.6124 | b <sub>14</sub> -H <sub>3</sub> PO <sub>4</sub> |
| 200.103                | b <sub>2</sub>                                 | 475.2875               | y <sub>4</sub>                                 | 706.373                | y <sub>7</sub>                                                | 941.3612  | b <sub>9</sub>                                  | 1349.6543 | y <sub>14</sub> -H <sub>3</sub> PO <sub>4</sub> |
| 234.1448               | y <sub>2</sub>                                 | 485.1991               | b <sub>5</sub> -H <sub>3</sub> PO <sub>4</sub> | 724.3192 <sup>+2</sup> | y <sub>14</sub> <sup>+2</sup>                                 | 977.5262  | y <sub>10</sub>                                 | 1402.6445 | b <sub>15</sub> -H <sub>3</sub> PO <sub>4</sub> |
| 238.1474 <sup>+2</sup> | y <sub>4</sub> <sup>+2</sup>                   | 489.2667 <sup>+2</sup> | y <sub>10</sub> <sup>+2</sup>                  | 739.3601 <sup>+2</sup> | y <sub>15</sub> -H <sub>3</sub> PO <sub>4</sub> <sup>+2</sup> | 987.4378  | b <sub>11</sub> -H <sub>3</sub> PO <sub>4</sub> | 1413.5893 | b <sub>14</sub>                                 |
| 269.1244               | b <sub>3</sub> -H <sub>3</sub> PO <sub>4</sub> | 532.7828 <sup>+2</sup> | y <sub>11</sub> <sup>+2</sup>                  | 742.3366               | b <sub>8</sub> -H <sub>3</sub> PO <sub>4</sub>                | 1028.3932 | b <sub>10</sub>                                 | 1447.6312 | y <sub>14</sub>                                 |
| 281.6634 <sup>+2</sup> | y <sub>5</sub> <sup>+2</sup>                   | 562.3195               | y <sub>5</sub>                                 | 774.8786 <sup>+2</sup> | MH-H <sub>3</sub> PO <sub>4</sub> <sup>+2</sup>               | 1064.5582 | y <sub>11</sub>                                 | 1477.7129 | y <sub>15</sub> -H <sub>3</sub> PO <sub>4</sub> |
| 310.1741 <sup>+2</sup> | y <sub>6</sub> <sup>+2</sup>                   | 572.2311               | b <sub>6</sub> -H <sub>3</sub> PO <sub>4</sub> | 783.292                | b <sub>7</sub>                                                | 1074.4698 | b <sub>12</sub> -H <sub>3</sub> PO <sub>4</sub> | 1500.6214 | b <sub>15</sub>                                 |
| 353.6901 <sup>+2</sup> | y <sub>7</sub> <sup>+2</sup>                   | 583.1759               | b <sub>5</sub>                                 | 788.3485 <sup>+2</sup> | y <sub>15</sub> <sup>+2</sup>                                 | 1085.4147 | b <sub>11</sub>                                 | 1548.75   | MH-H <sub>3</sub> PO <sub>4</sub>               |
| 362.2034               | y <sub>3</sub>                                 | 590.2962 <sup>+2</sup> | y <sub>12</sub> <sup>+2</sup>                  | 807.4207               | y <sub>8</sub>                                                | 1172.4467 | b <sub>12</sub>                                 | 1575.6898 | y <sub>15</sub>                                 |
| 367.1013               | b <sub>3</sub>                                 | 619.341                | y <sub>6</sub>                                 | 823.8671 <sup>+2</sup> | MH <sup>+2</sup>                                              | 1179.5852 | y <sub>12</sub>                                 | 1646.7269 | MH                                              |

MS/MS Fragmentation of RAQsTDSLGTSGSLQSK  
 Found in IPI00293009, Isoform 1 of Rab GTPase-binding effector protein 1

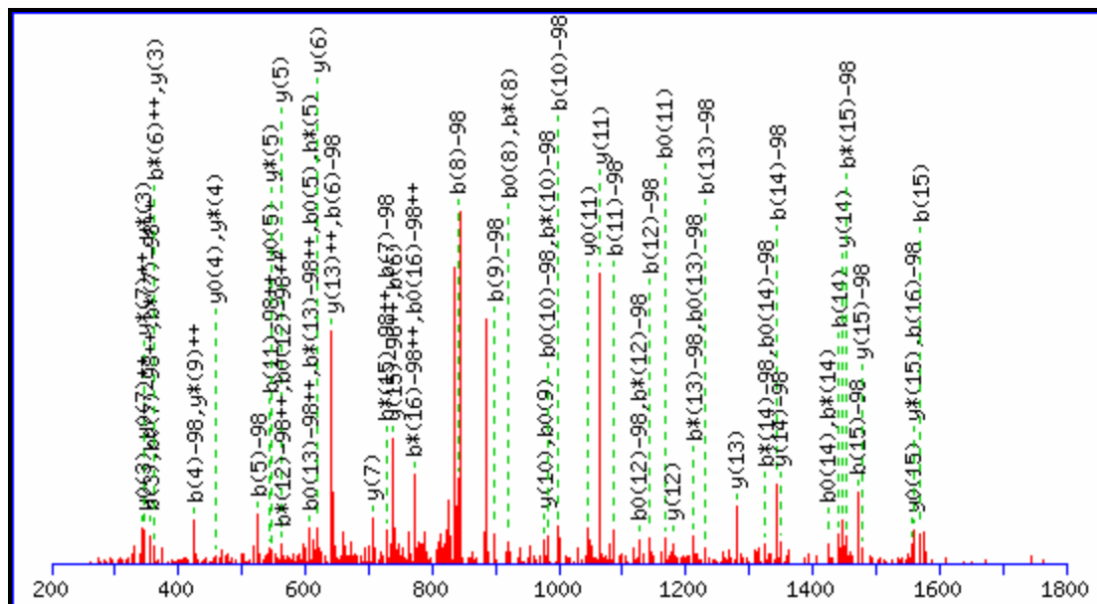

|                        |                                                              |                        |                                                               |                        |                                                               |                        |                                                 |           |                                                 |
|------------------------|--------------------------------------------------------------|------------------------|---------------------------------------------------------------|------------------------|---------------------------------------------------------------|------------------------|-------------------------------------------------|-----------|-------------------------------------------------|
| 74.0600 <sup>+2</sup>  | y <sub>1</sub> <sup>+2</sup>                                 | 370.1422 <sup>+2</sup> | b <sub>6</sub> <sup>+2</sup>                                  | 592.7508 <sup>+2</sup> | b <sub>11</sub> <sup>+2</sup>                                 | 788.3485 <sup>+2</sup> | y <sub>15</sub> <sup>+2</sup>                   | 1230.5709 | b <sub>13</sub> -H <sub>3</sub> PO <sub>4</sub> |
| 114.5764 <sup>+2</sup> | b <sub>2</sub> <sup>+2</sup>                                 | 404.2140 <sup>+2</sup> | y <sub>8</sub> <sup>+2</sup>                                  | 615.7891 <sup>+2</sup> | b <sub>13</sub> -H <sub>3</sub> PO <sub>4</sub> <sup>+2</sup> | 807.4207               | y <sub>8</sub>                                  | 1241.5158 | b <sub>12</sub>                                 |
| 117.5761 <sup>+2</sup> | y <sub>2</sub> <sup>+2</sup>                                 | 413.6582 <sup>+2</sup> | b <sub>7</sub> <sup>+2</sup>                                  | 619.341                | y <sub>6</sub>                                                | 823.8671 <sup>+2</sup> | y <sub>16</sub> <sup>+2</sup>                   | 1280.6329 | y <sub>13</sub>                                 |
| 147.1128               | y <sub>1</sub>                                               | 421.2118 <sup>+2</sup> | b <sub>8</sub> -H <sub>3</sub> PO <sub>4</sub> <sup>+2</sup>  | 621.2615 <sup>+2</sup> | b <sub>12</sub> <sup>+2</sup>                                 | 826.3091               | b <sub>7</sub>                                  | 1328.5478 | b <sub>13</sub>                                 |
| 178.6057 <sup>+2</sup> | b <sub>3</sub> <sup>+2</sup>                                 | 425.2255               | b <sub>4</sub> -H <sub>3</sub> PO <sub>4</sub>                | 624.2501               | b <sub>5</sub>                                                | 828.8649 <sup>+2</sup> | b <sub>16</sub> <sup>+2</sup>                   | 1343.655  | b <sub>14</sub> -H <sub>3</sub> PO <sub>4</sub> |
| 181.6053 <sup>+2</sup> | y <sub>3</sub> <sup>+2</sup>                                 | 432.7247 <sup>+2</sup> | y <sub>9</sub> <sup>+2</sup>                                  | 640.8201 <sup>+2</sup> | y <sub>13</sub> <sup>+2</sup>                                 | 841.4163               | b <sub>8</sub> -H <sub>3</sub> PO <sub>4</sub>  | 1349.6543 | y <sub>14</sub> -H <sub>3</sub> PO <sub>4</sub> |
| 213.1164 <sup>+2</sup> | b <sub>1</sub> -H <sub>3</sub> PO <sub>4</sub> <sup>+2</sup> | 449.7225 <sup>+2</sup> | b <sub>9</sub> -H <sub>3</sub> PO <sub>4</sub> <sup>+2</sup>  | 641.3002               | b <sub>6</sub> -H <sub>3</sub> PO <sub>4</sub>                | 852.9292 <sup>+2</sup> | MH-H <sub>3</sub> PO <sub>4</sub> <sup>+2</sup> | 1441.6319 | b <sub>14</sub>                                 |
| 228.1455               | b <sub>2</sub>                                               | 470.2002 <sup>+2</sup> | b <sub>8</sub> <sup>+2</sup>                                  | 664.7775 <sup>+2</sup> | b <sub>13</sub> <sup>+2</sup>                                 | 864.4421               | y <sub>9</sub>                                  | 1447.6312 | y <sub>14</sub>                                 |
| 234.1448               | y <sub>2</sub>                                               | 475.2875               | y <sub>4</sub>                                                | 672.3311 <sup>+2</sup> | b <sub>14</sub> -H <sub>3</sub> PO <sub>4</sub> <sup>+2</sup> | 898.4377               | b <sub>9</sub> -H <sub>3</sub> PO <sub>4</sub>  | 1471.7136 | b <sub>15</sub> -H <sub>3</sub> PO <sub>4</sub> |
| 238.1474 <sup>+2</sup> | y <sub>4</sub> <sup>+2</sup>                                 | 489.2667 <sup>+2</sup> | y <sub>10</sub> <sup>+2</sup>                                 | 675.3308 <sup>+2</sup> | y <sub>14</sub> -H <sub>3</sub> PO <sub>4</sub> <sup>+2</sup> | 901.9176 <sup>+2</sup> | MH <sup>+2</sup>                                | 1477.7129 | y <sub>15</sub> -H <sub>3</sub> PO <sub>4</sub> |
| 262.1049 <sup>+2</sup> | b <sub>4</sub> <sup>+2</sup>                                 | 498.7109 <sup>+2</sup> | b <sub>9</sub> <sup>+2</sup>                                  | 706.373                | y <sub>7</sub>                                                | 939.3932               | b <sub>8</sub>                                  | 1548.75   | y <sub>16</sub> -H <sub>3</sub> PO <sub>4</sub> |
| 263.6402 <sup>+2</sup> | b <sub>5</sub> -H <sub>3</sub> PO <sub>4</sub> <sup>+2</sup> | 500.2463 <sup>+2</sup> | b <sub>10</sub> -H <sub>3</sub> PO <sub>4</sub> <sup>+2</sup> | 721.3196 <sup>+2</sup> | b <sub>14</sub> <sup>+2</sup>                                 | 977.5262               | y <sub>10</sub>                                 | 1558.7456 | b <sub>16</sub> -H <sub>3</sub> PO <sub>4</sub> |
| 281.6634 <sup>+2</sup> | y <sub>5</sub> <sup>+2</sup>                                 | 523.2024               | b <sub>4</sub>                                                | 724.3192 <sup>+2</sup> | y <sub>14</sub> <sup>+2</sup>                                 | 996.4146               | b <sub>9</sub>                                  | 1569.6905 | b <sub>15</sub>                                 |
| 310.1741 <sup>+2</sup> | y <sub>6</sub> <sup>+2</sup>                                 | 526.2732               | b <sub>5</sub> -H <sub>3</sub> PO <sub>4</sub>                | 728.3322               | b <sub>7</sub> -H <sub>3</sub> PO <sub>4</sub>                | 999.4854               | b <sub>10</sub> -H <sub>3</sub> PO <sub>4</sub> | 1575.6898 | y <sub>15</sub>                                 |
| 312.6287 <sup>+2</sup> | b <sub>5</sub> <sup>+2</sup>                                 | 532.7828 <sup>+2</sup> | y <sub>11</sub> <sup>+2</sup>                                 | 736.3604 <sup>+2</sup> | b <sub>15</sub> -H <sub>3</sub> PO <sub>4</sub> <sup>+2</sup> | 1064.5582              | y <sub>11</sub>                                 | 1646.7269 | y <sub>16</sub>                                 |
| 321.1537 <sup>+2</sup> | b <sub>6</sub> -H <sub>3</sub> PO <sub>4</sub> <sup>+2</sup> | 543.7624 <sup>+2</sup> | b <sub>11</sub> -H <sub>3</sub> PO <sub>4</sub> <sup>+2</sup> | 739.2771               | b <sub>6</sub>                                                | 1086.5174              | b <sub>11</sub> -H <sub>3</sub> PO <sub>4</sub> | 1656.7225 | b <sub>16</sub>                                 |
| 353.6901 <sup>+2</sup> | y <sub>7</sub> <sup>+2</sup>                                 | 549.2348 <sup>+2</sup> | b <sub>10</sub> <sup>+2</sup>                                 | 739.3601 <sup>+2</sup> | y <sub>15</sub> -H <sub>3</sub> PO <sub>4</sub> <sup>+2</sup> | 1097.4623              | b <sub>10</sub>                                 | 1704.8511 | MH-H <sub>3</sub> PO <sub>4</sub>               |
| 356.2041               | b <sub>3</sub>                                               | 562.3195               | y <sub>5</sub>                                                | 774.8786 <sup>+2</sup> | y <sub>16</sub> -H <sub>3</sub> PO <sub>4</sub> <sup>+2</sup> | 1143.5389              | b <sub>12</sub> -H <sub>3</sub> PO <sub>4</sub> | 1802.828  | MH                                              |
| 362.2034               | y <sub>3</sub>                                               | 572.2731 <sup>+2</sup> | b <sub>12</sub> -H <sub>3</sub> PO <sub>4</sub> <sup>+2</sup> | 779.8764 <sup>+2</sup> | b <sub>16</sub> -H <sub>3</sub> PO <sub>4</sub> <sup>+2</sup> | 1179.5852              | y <sub>12</sub>                                 |           |                                                 |
| 364.6697 <sup>+2</sup> | b <sub>7</sub> -H <sub>3</sub> PO <sub>4</sub> <sup>+2</sup> | 590.2962 <sup>+2</sup> | y <sub>12</sub> <sup>+2</sup>                                 | 785.3489 <sup>+2</sup> | b <sub>15</sub> <sup>+2</sup>                                 | 1184.4943              | b <sub>11</sub>                                 |           |                                                 |



MS/MS Fragmentation of RAQStDsLGTSGSLQSK  
 Found in IPI00293009, Isoform 1 of Rab GTPase-binding effector protein 1

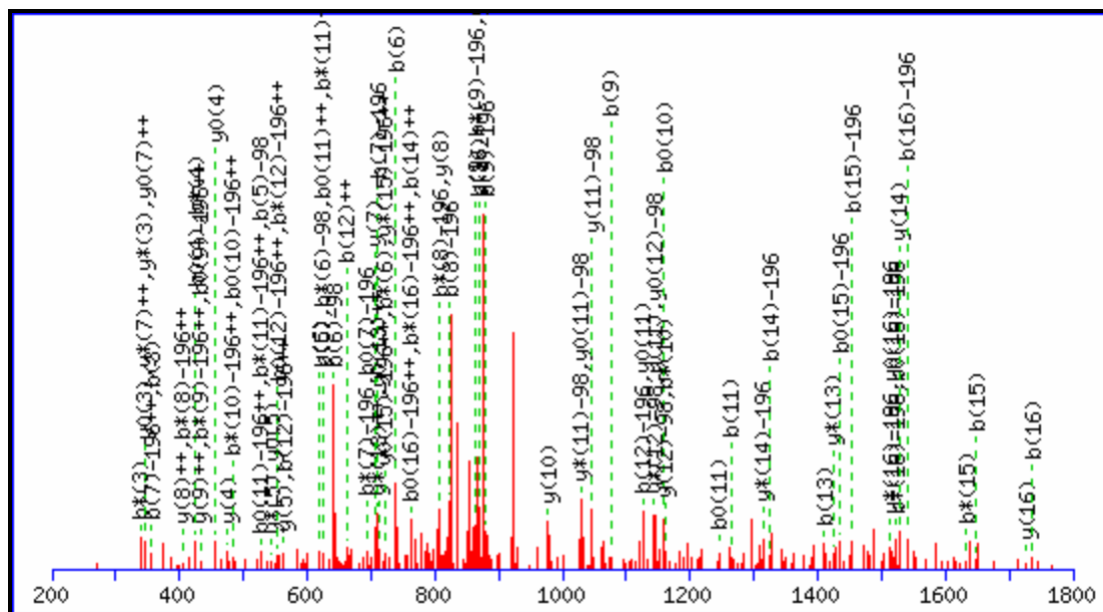

|                        |                                                               |                        |                                                                |                        |                                                                |                        |                                                  |           |                                                  |
|------------------------|---------------------------------------------------------------|------------------------|----------------------------------------------------------------|------------------------|----------------------------------------------------------------|------------------------|--------------------------------------------------|-----------|--------------------------------------------------|
| 74.0600 <sup>+2</sup>  | y <sub>1</sub> <sup>+2</sup>                                  | 453.6413 <sup>+2</sup> | b <sub>7</sub> <sup>+2</sup>                                   | 655.7723 <sup>+2</sup> | b <sub>13</sub> -H <sub>3</sub> PO <sub>4</sub> <sup>+2</sup>  | 828.3317 <sup>+2</sup> | y <sub>15</sub> <sup>+2</sup>                    | 1264.4607 | b <sub>11</sub>                                  |
| 114.5764 <sup>+2</sup> | b <sub>2</sub> <sup>+2</sup>                                  | 461.1949 <sup>+2</sup> | b <sub>8</sub> -H <sub>3</sub> PO <sub>4</sub> <sup>+2</sup>   | 661.2447 <sup>+2</sup> | b <sub>12</sub> <sup>+2</sup>                                  | 863.8503 <sup>+2</sup> | y <sub>16</sub> <sup>+2</sup>                    | 1310.5372 | b <sub>13</sub> -H <sub>3</sub> PO <sub>4</sub>  |
| 117.5761 <sup>+2</sup> | y <sub>2</sub> <sup>+2</sup>                                  | 475.2875               | y <sub>4</sub>                                                 | 663.3258 <sup>+2</sup> | b <sub>14</sub> -2H <sub>3</sub> PO <sub>4</sub> <sup>+2</sup> | 864.4421               | y <sub>9</sub>                                   | 1321.4821 | b <sub>12</sub>                                  |
| 147.1128               | y <sub>1</sub>                                                | 489.2667 <sup>+2</sup> | y <sub>10</sub> <sup>+2</sup>                                  | 666.3255 <sup>+2</sup> | y <sub>14</sub> -2H <sub>3</sub> PO <sub>4</sub> <sup>+2</sup> | 868.8480 <sup>+2</sup> | b <sub>16</sub> <sup>+2</sup>                    | 1325.6444 | b <sub>14</sub> -2H <sub>3</sub> PO <sub>4</sub> |
| 178.6057 <sup>+2</sup> | b <sub>3</sub> <sup>+2</sup>                                  | 489.7057 <sup>+2</sup> | b <sub>9</sub> -H <sub>3</sub> PO <sub>4</sub> <sup>+2</sup>   | 671.7979 <sup>+2</sup> | y <sub>13</sub> -H <sub>3</sub> PO <sub>4</sub> <sup>+2</sup>  | 880.4272               | b <sub>9</sub> -2H <sub>3</sub> PO <sub>4</sub>  | 1331.6437 | y <sub>14</sub> -2H <sub>3</sub> PO <sub>4</sub> |
| 181.6053 <sup>+2</sup> | y <sub>3</sub> <sup>+2</sup>                                  | 491.2411 <sup>+2</sup> | b <sub>10</sub> -2H <sub>3</sub> PO <sub>4</sub> <sup>+2</sup> | 704.7607 <sup>+2</sup> | b <sub>13</sub> <sup>+2</sup>                                  | 892.9124 <sup>+2</sup> | MH-H <sub>3</sub> PO <sub>4</sub> <sup>+2</sup>  | 1342.5886 | y <sub>13</sub> -H <sub>3</sub> PO <sub>4</sub>  |
| 222.1217 <sup>+2</sup> | b <sub>4</sub> <sup>+2</sup>                                  | 510.1834 <sup>+2</sup> | b <sub>8</sub> <sup>+2</sup>                                   | 706.373                | y <sub>7</sub>                                                 | 906.2754               | b <sub>7</sub>                                   | 1408.5141 | b <sub>13</sub>                                  |
| 228.1455               | b <sub>2</sub>                                                | 523.7775 <sup>+2</sup> | y <sub>11</sub> -H <sub>3</sub> PO <sub>4</sub> <sup>+2</sup>  | 710.3216               | b <sub>7</sub> -2H <sub>3</sub> PO <sub>4</sub>                | 921.3826               | b <sub>8</sub> -H <sub>3</sub> PO <sub>4</sub>   | 1423.6213 | b <sub>14</sub> -H <sub>3</sub> PO <sub>4</sub>  |
| 234.1448               | y <sub>2</sub>                                                | 526.2732               | b <sub>5</sub> -H <sub>3</sub> PO <sub>4</sub>                 | 712.3143 <sup>+2</sup> | b <sub>14</sub> -H <sub>3</sub> PO <sub>4</sub> <sup>+2</sup>  | 941.9008 <sup>+2</sup> | MH <sup>+2</sup>                                 | 1429.6206 | y <sub>14</sub> -H <sub>3</sub> PO <sub>4</sub>  |
| 238.1474 <sup>+2</sup> | y <sub>4</sub> <sup>+2</sup>                                  | 534.7571 <sup>+2</sup> | b <sub>11</sub> -2H <sub>3</sub> PO <sub>4</sub> <sup>+2</sup> | 715.3140 <sup>+2</sup> | y <sub>14</sub> -H <sub>3</sub> PO <sub>4</sub> <sup>+2</sup>  | 977.5262               | y <sub>10</sub>                                  | 1440.5655 | y <sub>13</sub>                                  |
| 263.6402 <sup>+2</sup> | b <sub>5</sub> -H <sub>3</sub> PO <sub>4</sub> <sup>+2</sup>  | 538.6941 <sup>+2</sup> | b <sub>9</sub> <sup>+2</sup>                                   | 720.7864 <sup>+2</sup> | y <sub>13</sub> <sup>+2</sup>                                  | 978.4041               | b <sub>9</sub> -H <sub>3</sub> PO <sub>4</sub>   | 1453.703  | b <sub>15</sub> -2H <sub>3</sub> PO <sub>4</sub> |
| 281.6634 <sup>+2</sup> | y <sub>5</sub> <sup>+2</sup>                                  | 540.2295 <sup>+2</sup> | b <sub>10</sub> -H <sub>3</sub> PO <sub>4</sub> <sup>+2</sup>  | 727.3551 <sup>+2</sup> | b <sub>15</sub> -2H <sub>3</sub> PO <sub>4</sub> <sup>+2</sup> | 981.4748               | b <sub>10</sub> -2H <sub>3</sub> PO <sub>4</sub> | 1459.7023 | y <sub>15</sub> -2H <sub>3</sub> PO <sub>4</sub> |
| 310.1741 <sup>+2</sup> | y <sub>6</sub> <sup>+2</sup>                                  | 562.3195               | y <sub>5</sub>                                                 | 730.3548 <sup>+2</sup> | y <sub>15</sub> -2H <sub>3</sub> PO <sub>4</sub> <sup>+2</sup> | 1019.3595              | b <sub>8</sub>                                   | 1521.5982 | b <sub>14</sub>                                  |
| 312.6287 <sup>+2</sup> | b <sub>5</sub> <sup>+2</sup>                                  | 563.2678 <sup>+2</sup> | b <sub>12</sub> -2H <sub>3</sub> PO <sub>4</sub> <sup>+2</sup> | 739.2771               | b <sub>6</sub>                                                 | 1046.5477              | y <sub>11</sub> -H <sub>3</sub> PO <sub>4</sub>  | 1527.5975 | y <sub>14</sub>                                  |
| 321.1537 <sup>+2</sup> | b <sub>6</sub> -H <sub>3</sub> PO <sub>4</sub> <sup>+2</sup>  | 572.7659 <sup>+2</sup> | y <sub>11</sub> <sup>+2</sup>                                  | 761.3027 <sup>+2</sup> | b <sub>14</sub> <sup>+2</sup>                                  | 1068.5069              | b <sub>11</sub> -2H <sub>3</sub> PO <sub>4</sub> | 1530.7394 | y <sub>16</sub> -2H <sub>3</sub> PO <sub>4</sub> |
| 353.6901 <sup>+2</sup> | y <sub>7</sub> <sup>+2</sup>                                  | 581.2909 <sup>+2</sup> | y <sub>12</sub> -H <sub>3</sub> PO <sub>4</sub> <sup>+2</sup>  | 764.3024 <sup>+2</sup> | y <sub>14</sub> <sup>+2</sup>                                  | 1076.3809              | b <sub>9</sub>                                   | 1540.735  | b <sub>16</sub> -2H <sub>3</sub> PO <sub>4</sub> |
| 355.6645 <sup>+2</sup> | b <sub>7</sub> -2H <sub>3</sub> PO <sub>4</sub> <sup>+2</sup> | 583.7455 <sup>+2</sup> | b <sub>11</sub> -H <sub>3</sub> PO <sub>4</sub> <sup>+2</sup>  | 765.8734 <sup>+2</sup> | y <sub>16</sub> -2H <sub>3</sub> PO <sub>4</sub> <sup>+2</sup> | 1079.4517              | b <sub>10</sub> -H <sub>3</sub> PO <sub>4</sub>  | 1551.6799 | b <sub>15</sub> -H <sub>3</sub> PO <sub>4</sub>  |
| 356.2041               | b <sub>3</sub>                                                | 589.2180 <sup>+2</sup> | b <sub>10</sub> <sup>+2</sup>                                  | 770.8712 <sup>+2</sup> | b <sub>16</sub> -2H <sub>3</sub> PO <sub>4</sub> <sup>+2</sup> | 1125.5283              | b <sub>12</sub> -2H <sub>3</sub> PO <sub>4</sub> | 1557.6792 | y <sub>15</sub> -H <sub>3</sub> PO <sub>4</sub>  |
| 362.2034               | y <sub>3</sub>                                                | 606.7838 <sup>+2</sup> | b <sub>13</sub> -2H <sub>3</sub> PO <sub>4</sub> <sup>+2</sup> | 776.3436 <sup>+2</sup> | b <sub>15</sub> -H <sub>3</sub> PO <sub>4</sub> <sup>+2</sup>  | 1144.5246              | y <sub>11</sub>                                  | 1628.7163 | y <sub>16</sub> -H <sub>3</sub> PO <sub>4</sub>  |
| 370.1422 <sup>+2</sup> | b <sub>6</sub> <sup>+2</sup>                                  | 612.2562 <sup>+2</sup> | b <sub>12</sub> -H <sub>3</sub> PO <sub>4</sub> <sup>+2</sup>  | 779.3432 <sup>+2</sup> | y <sub>15</sub> -H <sub>3</sub> PO <sub>4</sub> <sup>+2</sup>  | 1161.5746              | y <sub>12</sub> -H <sub>3</sub> PO <sub>4</sub>  | 1638.7119 | b <sub>16</sub> -H <sub>3</sub> PO <sub>4</sub>  |
| 404.2140 <sup>+2</sup> | y <sub>8</sub> <sup>+2</sup>                                  | 619.341                | y <sub>6</sub>                                                 | 807.4207               | y <sub>8</sub>                                                 | 1166.4838              | b <sub>11</sub> -H <sub>3</sub> PO <sub>4</sub>  | 1649.6568 | b <sub>15</sub>                                  |
| 404.6529 <sup>+2</sup> | b <sub>7</sub> -H <sub>3</sub> PO <sub>4</sub> <sup>+2</sup>  | 622.8095 <sup>+2</sup> | y <sub>13</sub> -2H <sub>3</sub> PO <sub>4</sub> <sup>+2</sup> | 808.2985               | b <sub>7</sub> -H <sub>3</sub> PO <sub>4</sub>                 | 1177.4286              | b <sub>10</sub>                                  | 1655.6561 | y <sub>15</sub>                                  |
| 412.2065 <sup>+2</sup> | b <sub>8</sub> -2H <sub>3</sub> PO <sub>4</sub> <sup>+2</sup> | 624.2501               | b <sub>5</sub>                                                 | 814.8618 <sup>+2</sup> | y <sub>16</sub> -H <sub>3</sub> PO <sub>4</sub> <sup>+2</sup>  | 1212.5604              | b <sub>13</sub> -2H <sub>3</sub> PO <sub>4</sub> | 1726.6932 | y <sub>16</sub>                                  |
| 432.7247 <sup>+2</sup> | y <sub>9</sub> <sup>+2</sup>                                  | 630.2794 <sup>+2</sup> | y <sub>12</sub> <sup>+2</sup>                                  | 819.8596 <sup>+2</sup> | b <sub>16</sub> -H <sub>3</sub> PO <sub>4</sub> <sup>+2</sup>  | 1223.5052              | b <sub>12</sub> -H <sub>3</sub> PO <sub>4</sub>  | 1736.6888 | b <sub>16</sub>                                  |
| 440.7172 <sup>+2</sup> | b <sub>9</sub> -2H <sub>3</sub> PO <sub>4</sub> <sup>+2</sup> | 632.7340 <sup>+2</sup> | b <sub>11</sub> <sup>+2</sup>                                  | 823.4057               | b <sub>8</sub> -2H <sub>3</sub> PO <sub>4</sub>                | 1244.6117              | y <sub>13</sub> -2H <sub>3</sub> PO <sub>4</sub> | 1784.8174 | MH-H <sub>3</sub> PO <sub>4</sub>                |
| 443.2361               | b <sub>4</sub>                                                | 641.3002               | b <sub>6</sub> -H <sub>3</sub> PO <sub>4</sub>                 | 825.3320 <sup>+2</sup> | b <sub>15</sub> <sup>+2</sup>                                  | 1259.5515              | y <sub>12</sub>                                  | 1882.7943 | MH                                               |

MS/MS Fragmentation of VPLPLSLLAGPADAR  
 Found in IPI00375907, Hypothetical protein

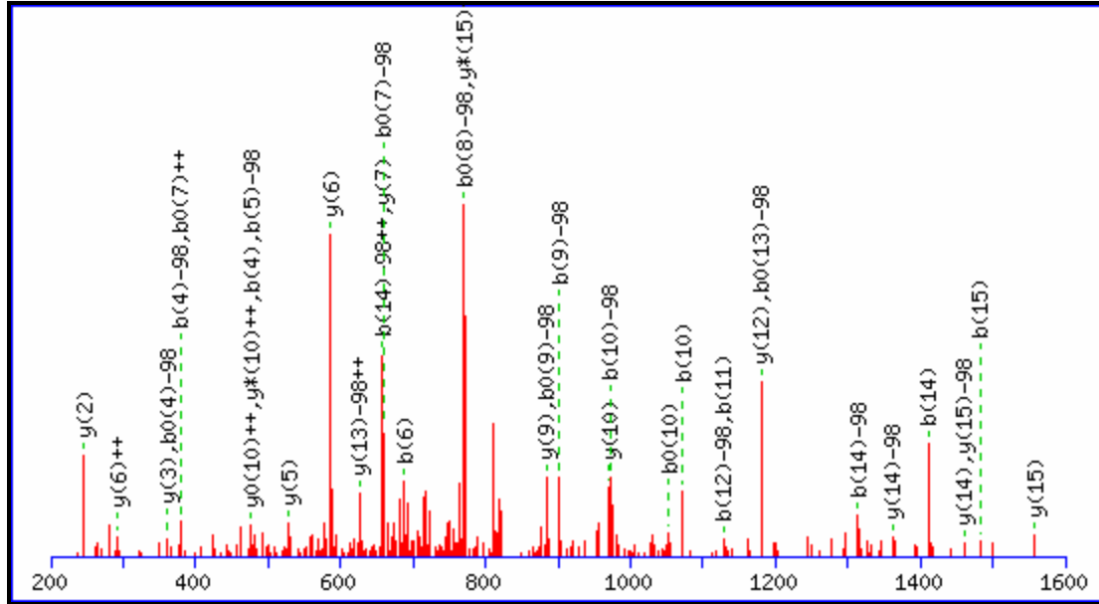

|                        |                                                |                        |                                                               |                        |                                                               |           |                                                 |           |                                                 |
|------------------------|------------------------------------------------|------------------------|---------------------------------------------------------------|------------------------|---------------------------------------------------------------|-----------|-------------------------------------------------|-----------|-------------------------------------------------|
| 88.0631 <sup>+2</sup>  | y <sub>1</sub> <sup>+2</sup>                   | 432.2201               | y <sub>4</sub>                                                | 676.4028               | b <sub>7</sub> -H <sub>3</sub> PO <sub>4</sub>                | 970.5316  | y <sub>10</sub>                                 | 1347.6668 | y <sub>13</sub>                                 |
| 123.5817 <sup>+2</sup> | y <sub>2</sub> <sup>+2</sup>                   | 442.2534 <sup>+2</sup> | y <sub>9</sub> <sup>+2</sup>                                  | 681.8906 <sup>+2</sup> | y <sub>14</sub> -H <sub>3</sub> PO <sub>4</sub> <sup>+2</sup> | 973.6081  | b <sub>10</sub> -H <sub>3</sub> PO <sub>4</sub> | 1362.774  | y <sub>14</sub> -H <sub>3</sub> PO <sub>4</sub> |
| 175.119                | y <sub>1</sub>                                 | 476.2867               | b <sub>5</sub> -H <sub>3</sub> PO <sub>4</sub>                | 687.3477               | b <sub>6</sub>                                                | 1000.5479 | b <sub>9</sub>                                  | 1384.7835 | b <sub>15</sub> -H <sub>3</sub> PO <sub>4</sub> |
| 181.0951 <sup>+2</sup> | y <sub>3</sub> <sup>+2</sup>                   | 477.2109               | b <sub>4</sub>                                                | 730.4170 <sup>+2</sup> | y <sub>15</sub> -H <sub>3</sub> PO <sub>4</sub> <sup>+2</sup> | 1030.6295 | b <sub>11</sub> -H <sub>3</sub> PO <sub>4</sub> | 1411.7233 | b <sub>14</sub>                                 |
| 197.1285               | b <sub>2</sub>                                 | 485.7694 <sup>+2</sup> | y <sub>10</sub> <sup>+2</sup>                                 | 730.8791 <sup>+2</sup> | y <sub>14</sub> <sup>+2</sup>                                 | 1071.585  | b <sub>10</sub>                                 | 1459.8267 | y <sub>15</sub> -H <sub>3</sub> PO <sub>4</sub> |
| 216.6137 <sup>+2</sup> | y <sub>4</sub> <sup>+2</sup>                   | 529.2729               | y <sub>5</sub>                                                | 770.4155               | y <sub>8</sub>                                                | 1083.6157 | y <sub>11</sub>                                 | 1460.7509 | y <sub>14</sub>                                 |
| 246.1561               | y <sub>2</sub>                                 | 542.3115 <sup>+2</sup> | y <sub>11</sub> <sup>+2</sup>                                 | 774.3797               | b <sub>7</sub>                                                | 1127.6823 | b <sub>12</sub> -H <sub>3</sub> PO <sub>4</sub> | 1482.7604 | b <sub>15</sub>                                 |
| 265.1401 <sup>+2</sup> | y <sub>5</sub> <sup>+2</sup>                   | 574.2636               | b <sub>5</sub>                                                | 779.4055 <sup>+2</sup> | y <sub>15</sub> <sup>+2</sup>                                 | 1128.6064 | b <sub>11</sub>                                 | 1557.8036 | y <sub>15</sub>                                 |
| 293.6508 <sup>+2</sup> | y <sub>6</sub> <sup>+2</sup>                   | 586.2944               | y <sub>6</sub>                                                | 779.9512 <sup>+2</sup> | MH-H <sub>3</sub> PO <sub>4</sub> <sup>+2</sup>               | 1180.6684 | y <sub>12</sub>                                 | 1558.8952 | MH-H <sub>3</sub> PO <sub>4</sub>               |
| 310.2125               | b <sub>3</sub>                                 | 589.3708               | b <sub>6</sub> -H <sub>3</sub> PO <sub>4</sub>                | 789.4869               | b <sub>8</sub> -H <sub>3</sub> PO <sub>4</sub>                | 1198.7194 | b <sub>13</sub> -H <sub>3</sub> PO <sub>4</sub> | 1656.872  | MH                                              |
| 329.1694 <sup>+2</sup> | y <sub>7</sub> <sup>+2</sup>                   | 590.8379 <sup>+2</sup> | y <sub>12</sub> <sup>+2</sup>                                 | 828.9397 <sup>+2</sup> | MH <sup>+2</sup>                                              | 1225.6592 | b <sub>12</sub>                                 |           |                                                 |
| 361.183                | y <sub>3</sub>                                 | 625.3486 <sup>+2</sup> | y <sub>13</sub> -H <sub>3</sub> PO <sub>4</sub> <sup>+2</sup> | 883.4996               | y <sub>9</sub>                                                | 1249.6899 | y <sub>13</sub> -H <sub>3</sub> PO <sub>4</sub> |           |                                                 |
| 379.234                | b <sub>4</sub> -H <sub>3</sub> PO <sub>4</sub> | 657.3315               | y <sub>7</sub>                                                | 887.4638               | b <sub>8</sub>                                                | 1296.6963 | b <sub>13</sub>                                 |           |                                                 |
| 385.7114 <sup>+2</sup> | y <sub>8</sub> <sup>+2</sup>                   | 674.3370 <sup>+2</sup> | y <sub>13</sub> <sup>+2</sup>                                 | 902.571                | b <sub>9</sub> -H <sub>3</sub> PO <sub>4</sub>                | 1313.7464 | b <sub>14</sub> -H <sub>3</sub> PO <sub>4</sub> |           |                                                 |

MS/MS Fragmentation of GsVHSLDAGLLPSGDPFSK  
 Found in IPI00293009, Isoform 1 of Rab GTPase-binding effector protein 1

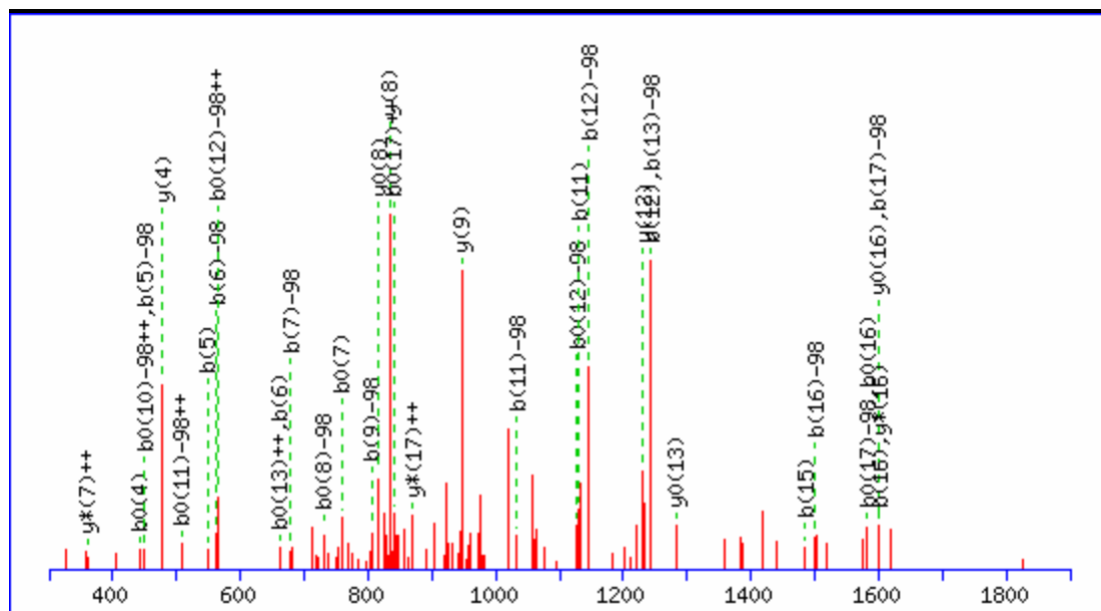

|                        |                                                              |                        |                                                               |                        |                                                               |                         |                                                               |           |                                                 |
|------------------------|--------------------------------------------------------------|------------------------|---------------------------------------------------------------|------------------------|---------------------------------------------------------------|-------------------------|---------------------------------------------------------------|-----------|-------------------------------------------------|
| 74.0600 <sup>+2</sup>  | y <sub>1</sub> <sup>+2</sup>                                 | 388.6524 <sup>+2</sup> | b <sub>7</sub> <sup>+2</sup>                                  | 651.3586 <sup>+2</sup> | y <sub>13</sub> <sup>+2</sup>                                 | 904.356                 | b <sub>9</sub>                                                | 1386.7376 | b <sub>15</sub> -H <sub>3</sub> PO <sub>4</sub> |
| 117.5761 <sup>+2</sup> | y <sub>1</sub> <sup>+2</sup>                                 | 403.6932 <sup>+2</sup> | b <sub>9</sub> -H <sub>3</sub> PO <sub>4</sub> <sup>+2</sup>  | 661.2705               | b <sub>6</sub>                                                | 916.9625 <sup>+2</sup>  | b <sub>19</sub> -H <sub>3</sub> PO <sub>4</sub> <sup>+2</sup> | 1416.7369 | y <sub>14</sub>                                 |
| 127.0502               | b <sub>2</sub> -H <sub>3</sub> PO <sub>4</sub>               | 417.7032 <sup>+2</sup> | y <sub>8</sub> <sup>+2</sup>                                  | 665.3617 <sup>+2</sup> | b <sub>14</sub> -H <sub>3</sub> PO <sub>4</sub> <sup>+2</sup> | 919.4632                | b <sub>10</sub> -H <sub>3</sub> PO <sub>4</sub>               | 1427.693  | b <sub>14</sub>                                 |
| 147.1128               | y <sub>1</sub>                                               | 424.1709 <sup>+2</sup> | b <sub>8</sub> <sup>+2</sup>                                  | 670.8341 <sup>+2</sup> | b <sub>13</sub> <sup>+2</sup>                                 | 922.4349 <sup>+2</sup>  | b <sub>18</sub> <sup>+2</sup>                                 | 1484.7145 | b <sub>15</sub>                                 |
| 182.0924 <sup>+2</sup> | b <sub>4</sub> -H <sub>3</sub> PO <sub>4</sub> <sup>+2</sup> | 450.2096               | b <sub>5</sub> -H <sub>3</sub> PO <sub>4</sub>                | 678.3206               | b <sub>7</sub> -H <sub>3</sub> PO <sub>4</sub>                | 926.9938 <sup>+2</sup>  | y <sub>18</sub> <sup>+2</sup>                                 | 1501.7645 | b <sub>16</sub> -H <sub>3</sub> PO <sub>4</sub> |
| 191.1103 <sup>+2</sup> | y <sub>3</sub> <sup>+2</sup>                                 | 452.6817 <sup>+2</sup> | b <sub>9</sub> <sup>+2</sup>                                  | 693.8724 <sup>+2</sup> | b <sub>15</sub> -H <sub>3</sub> PO <sub>4</sub> <sup>+2</sup> | 947.4833                | y <sub>9</sub>                                                | 1529.821  | y <sub>15</sub>                                 |
| 225.0271               | b <sub>2</sub>                                               | 460.2352 <sup>+2</sup> | b <sub>10</sub> -H <sub>3</sub> PO <sub>4</sub> <sup>+2</sup> | 708.8721 <sup>+2</sup> | y <sub>14</sub> <sup>+2</sup>                                 | 961.5045 <sup>+2</sup>  | y <sub>19</sub> -H <sub>3</sub> PO <sub>4</sub> <sup>+2</sup> | 1598.8173 | b <sub>17</sub> -H <sub>3</sub> PO <sub>4</sub> |
| 225.6084 <sup>+2</sup> | b <sub>5</sub> -H <sub>3</sub> PO <sub>4</sub> <sup>+2</sup> | 461.1544               | b <sub>4</sub>                                                | 714.3501 <sup>+2</sup> | b <sub>14</sub> <sup>+2</sup>                                 | 965.9510 <sup>+2</sup>  | b <sub>19</sub> <sup>+2</sup>                                 | 1599.7414 | b <sub>16</sub>                                 |
| 226.1186               | b <sub>3</sub> -H <sub>3</sub> PO <sub>4</sub>               | 474.2453 <sup>+2</sup> | y <sub>9</sub> <sup>+2</sup>                                  | 737.3464               | y <sub>7</sub>                                                | 990.0153 <sup>+2</sup>  | MH-H <sub>3</sub> PO <sub>4</sub> <sup>+2</sup>               | 1616.853  | y <sub>16</sub>                                 |
| 231.0809 <sup>+2</sup> | b <sub>4</sub> <sup>+2</sup>                                 | 478.266                | y <sub>4</sub>                                                | 742.8609 <sup>+2</sup> | b <sub>15</sub> <sup>+2</sup>                                 | 1010.4930 <sup>+2</sup> | y <sub>19</sub> <sup>+2</sup>                                 | 1696.7942 | b <sub>17</sub>                                 |
| 234.1448               | y <sub>2</sub>                                               | 509.2237 <sup>+2</sup> | b <sub>10</sub> <sup>+2</sup>                                 | 749.3577               | b <sub>8</sub> -H <sub>3</sub> PO <sub>4</sub>                | 1017.4401               | b <sub>10</sub>                                               | 1745.8857 | b <sub>18</sub> -H <sub>3</sub> PO <sub>4</sub> |
| 239.6366 <sup>+2</sup> | y <sub>4</sub> <sup>+2</sup>                                 | 516.7773 <sup>+2</sup> | b <sub>11</sub> -H <sub>3</sub> PO <sub>4</sub> <sup>+2</sup> | 751.3859 <sup>+2</sup> | b <sub>16</sub> -H <sub>3</sub> PO <sub>4</sub> <sup>+2</sup> | 1032.5473               | b <sub>11</sub> -H <sub>3</sub> PO <sub>4</sub>               | 1753.9119 | y <sub>17</sub>                                 |
| 274.5969 <sup>+2</sup> | b <sub>5</sub> <sup>+2</sup>                                 | 530.7873 <sup>+2</sup> | y <sub>10</sub> <sup>+2</sup>                                 | 765.4141 <sup>+2</sup> | y <sub>15</sub> <sup>+2</sup>                                 | 1039.0037 <sup>+2</sup> | MH <sup>+2</sup>                                              | 1832.9177 | b <sub>19</sub> -H <sub>3</sub> PO <sub>4</sub> |
| 282.1504 <sup>+2</sup> | b <sub>6</sub> -H <sub>3</sub> PO <sub>4</sub> <sup>+2</sup> | 548.1865               | b <sub>5</sub>                                                | 776.2975               | b <sub>7</sub>                                                | 1060.5673               | y <sub>10</sub>                                               | 1843.8626 | b <sub>18</sub>                                 |
| 297.1501 <sup>+2</sup> | y <sub>5</sub> <sup>+2</sup>                                 | 563.2936               | b <sub>6</sub> -H <sub>3</sub> PO <sub>4</sub>                | 799.9123 <sup>+2</sup> | b <sub>17</sub> -H <sub>3</sub> PO <sub>4</sub> <sup>+2</sup> | 1130.5242               | b <sub>11</sub>                                               | 1852.9803 | y <sub>18</sub>                                 |
| 324.0955               | b <sub>3</sub>                                               | 565.7657 <sup>+2</sup> | b <sub>11</sub> <sup>+2</sup>                                 | 800.3744 <sup>+2</sup> | b <sub>16</sub> <sup>+2</sup>                                 | 1145.6313               | b <sub>12</sub> -H <sub>3</sub> PO <sub>4</sub>               | 1922.0018 | y <sub>19</sub> -H <sub>3</sub> PO <sub>4</sub> |
| 325.6608 <sup>+2</sup> | y <sub>6</sub> <sup>+2</sup>                                 | 573.3193 <sup>+2</sup> | b <sub>12</sub> -H <sub>3</sub> PO <sub>4</sub> <sup>+2</sup> | 806.3791               | b <sub>9</sub> -H <sub>3</sub> PO <sub>4</sub>                | 1173.6514               | y <sub>11</sub>                                               | 1930.8946 | b <sub>19</sub>                                 |
| 331.1389 <sup>+2</sup> | b <sub>6</sub> <sup>+2</sup>                                 | 587.3293 <sup>+2</sup> | y <sub>11</sub> <sup>+2</sup>                                 | 808.9301 <sup>+2</sup> | y <sub>16</sub> <sup>+2</sup>                                 | 1230.6729               | y <sub>12</sub>                                               | 1979.0233 | MH-H <sub>3</sub> PO <sub>4</sub>               |
| 339.6639 <sup>+2</sup> | b <sub>7</sub> -H <sub>3</sub> PO <sub>4</sub> <sup>+2</sup> | 593.293                | y <sub>5</sub>                                                | 834.3992               | y <sub>8</sub>                                                | 1242.6841               | b <sub>13</sub> -H <sub>3</sub> PO <sub>4</sub>               | 2019.9787 | y <sub>19</sub>                                 |
| 363.1775               | b <sub>4</sub> -H <sub>3</sub> PO <sub>4</sub>               | 615.8401 <sup>+2</sup> | y <sub>12</sub> <sup>+2</sup>                                 | 847.3346               | b <sub>8</sub>                                                | 1243.6082               | b <sub>12</sub>                                               | 2077.0002 | MH                                              |
| 369.1769 <sup>+2</sup> | y <sub>7</sub> <sup>+2</sup>                                 | 621.8457 <sup>+2</sup> | b <sub>13</sub> -H <sub>3</sub> PO <sub>4</sub> <sup>+2</sup> | 848.9007 <sup>+2</sup> | b <sub>17</sub> <sup>+2</sup>                                 | 1301.71                 | y <sub>13</sub>                                               |           |                                                 |
| 375.1825 <sup>+2</sup> | b <sub>8</sub> -H <sub>3</sub> PO <sub>4</sub> <sup>+2</sup> | 622.3078 <sup>+2</sup> | b <sub>12</sub> <sup>+2</sup>                                 | 873.4465 <sup>+2</sup> | b <sub>18</sub> -H <sub>3</sub> PO <sub>4</sub> <sup>+2</sup> | 1329.7161               | b <sub>14</sub> -H <sub>3</sub> PO <sub>4</sub>               |           |                                                 |
| 381.2132               | y <sub>3</sub>                                               | 650.3144               | y <sub>6</sub>                                                | 877.4596 <sup>+2</sup> | y <sub>17</sub> <sup>+2</sup>                                 | 1340.661                | b <sub>13</sub>                                               |           |                                                 |

MS/MS Fragmentation of GSVHsLDAGLLPSGDPSK  
 Found in IPI00293009, Isoform 1 of Rab GTPase-binding effector protein 1

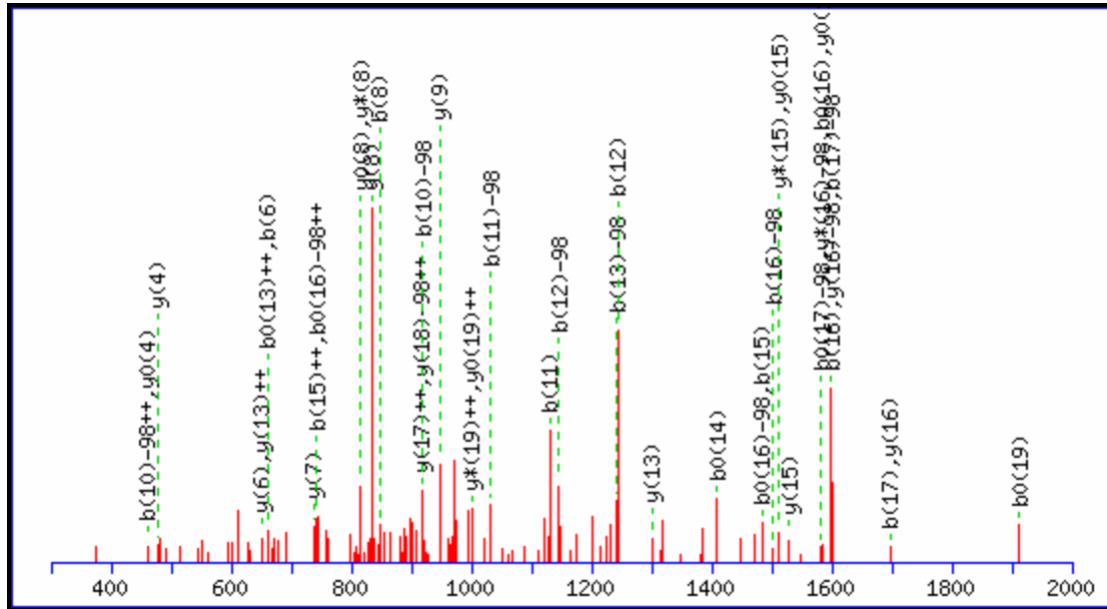

|                        |                                                              |                        |                                                               |                        |                                                               |                         |                                                               |           |                                                 |
|------------------------|--------------------------------------------------------------|------------------------|---------------------------------------------------------------|------------------------|---------------------------------------------------------------|-------------------------|---------------------------------------------------------------|-----------|-------------------------------------------------|
| 74.0600 <sup>+2</sup>  | y <sub>1</sub> <sup>+2</sup>                                 | 424.1709 <sup>+2</sup> | b <sub>8</sub> <sup>+2</sup>                                  | 678.3206               | b <sub>7</sub> -H <sub>3</sub> PO <sub>4</sub>                | 917.9885 <sup>+2</sup>  | y <sub>18</sub> -H <sub>3</sub> PO <sub>4</sub> <sup>+2</sup> | 1416.7369 | y <sub>14</sub>                                 |
| 117.5761 <sup>+2</sup> | y <sub>2</sub> <sup>+2</sup>                                 | 450.2096               | b <sub>5</sub> -H <sub>3</sub> PO <sub>4</sub>                | 693.8724 <sup>+2</sup> | b <sub>15</sub> -H <sub>3</sub> PO <sub>4</sub> <sup>+2</sup> | 919.4632                | b <sub>10</sub> -H <sub>3</sub> PO <sub>4</sub>               | 1427.693  | b <sub>14</sub>                                 |
| 145.0608               | b <sub>2</sub>                                               | 452.6817 <sup>+2</sup> | b <sub>9</sub> <sup>+2</sup>                                  | 708.8721 <sup>+2</sup> | y <sub>14</sub> <sup>+2</sup>                                 | 922.4349 <sup>+2</sup>  | b <sub>18</sub> <sup>+2</sup>                                 | 1484.7145 | b <sub>15</sub>                                 |
| 147.1128               | y <sub>1</sub>                                               | 460.2352 <sup>+2</sup> | b <sub>10</sub> -H <sub>3</sub> PO <sub>4</sub> <sup>+2</sup> | 714.3501 <sup>+2</sup> | b <sub>14</sub> <sup>+2</sup>                                 | 947.4833                | y <sub>9</sub>                                                | 1501.7645 | b <sub>16</sub> -H <sub>3</sub> PO <sub>4</sub> |
| 191.0977 <sup>+2</sup> | b <sub>4</sub> <sup>+2</sup>                                 | 474.2453 <sup>+2</sup> | y <sub>9</sub> <sup>+2</sup>                                  | 737.3464               | y <sub>7</sub>                                                | 961.5045 <sup>+2</sup>  | y <sub>19</sub> -H <sub>3</sub> PO <sub>4</sub> <sup>+2</sup> | 1529.821  | y <sub>15</sub>                                 |
| 191.1103 <sup>+2</sup> | y <sub>3</sub> <sup>+2</sup>                                 | 478.266                | y <sub>4</sub>                                                | 742.8609 <sup>+2</sup> | b <sub>15</sub> <sup>+2</sup>                                 | 965.9510 <sup>+2</sup>  | b <sub>19</sub> <sup>+2</sup>                                 | 1598.8173 | b <sub>17</sub> -H <sub>3</sub> PO <sub>4</sub> |
| 225.6084 <sup>+2</sup> | b <sub>5</sub> -H <sub>3</sub> PO <sub>4</sub> <sup>+2</sup> | 509.2237 <sup>+2</sup> | b <sub>10</sub> <sup>+2</sup>                                 | 749.3577               | b <sub>8</sub> -H <sub>3</sub> PO <sub>4</sub>                | 966.9770 <sup>+2</sup>  | y <sub>18</sub> <sup>+2</sup>                                 | 1598.8424 | y <sub>16</sub> -H <sub>3</sub> PO <sub>4</sub> |
| 234.1448               | y <sub>2</sub>                                               | 516.7773 <sup>+2</sup> | b <sub>11</sub> -H <sub>3</sub> PO <sub>4</sub> <sup>+2</sup> | 751.3859 <sup>+2</sup> | b <sub>16</sub> -H <sub>3</sub> PO <sub>4</sub> <sup>+2</sup> | 990.0153 <sup>+2</sup>  | MH-H <sub>3</sub> PO <sub>4</sub> <sup>+2</sup>               | 1599.7414 | b <sub>16</sub>                                 |
| 239.6366 <sup>+2</sup> | y <sub>4</sub> <sup>+2</sup>                                 | 530.7873 <sup>+2</sup> | y <sub>10</sub> <sup>+2</sup>                                 | 765.4141 <sup>+2</sup> | y <sub>15</sub> <sup>+2</sup>                                 | 1010.4930 <sup>+2</sup> | y <sub>19</sub> <sup>+2</sup>                                 | 1696.7942 | b <sub>17</sub>                                 |
| 244.1292               | b <sub>3</sub>                                               | 548.1865               | b <sub>5</sub>                                                | 776.2975               | b <sub>7</sub>                                                | 1017.4401               | b <sub>10</sub>                                               | 1696.8193 | y <sub>16</sub>                                 |
| 274.5969 <sup>+2</sup> | b <sub>5</sub> <sup>+2</sup>                                 | 563.2936               | b <sub>6</sub> -H <sub>3</sub> PO <sub>4</sub>                | 799.9123 <sup>+2</sup> | b <sub>17</sub> -H <sub>3</sub> PO <sub>4</sub> <sup>+2</sup> | 1032.5473               | b <sub>11</sub> -H <sub>3</sub> PO <sub>4</sub>               | 1735.9014 | y <sub>17</sub> -H <sub>3</sub> PO <sub>4</sub> |
| 282.1504 <sup>+2</sup> | b <sub>6</sub> -H <sub>3</sub> PO <sub>4</sub> <sup>+2</sup> | 565.7657 <sup>+2</sup> | b <sub>11</sub> <sup>+2</sup>                                 | 799.9249 <sup>+2</sup> | y <sub>16</sub> -H <sub>3</sub> PO <sub>4</sub> <sup>+2</sup> | 1039.0037 <sup>+2</sup> | MH <sup>+2</sup>                                              | 1745.8857 | b <sub>18</sub> -H <sub>3</sub> PO <sub>4</sub> |
| 297.1501 <sup>+2</sup> | y <sub>5</sub> <sup>+2</sup>                                 | 573.3193 <sup>+2</sup> | b <sub>12</sub> -H <sub>3</sub> PO <sub>4</sub> <sup>+2</sup> | 800.3744 <sup>+2</sup> | b <sub>16</sub> <sup>+2</sup>                                 | 1060.5673               | y <sub>10</sub>                                               | 1832.9177 | b <sub>19</sub> -H <sub>3</sub> PO <sub>4</sub> |
| 325.6608 <sup>+2</sup> | y <sub>6</sub> <sup>+2</sup>                                 | 587.3293 <sup>+2</sup> | y <sub>11</sub> <sup>+2</sup>                                 | 806.3791               | b <sub>9</sub> -H <sub>3</sub> PO <sub>4</sub>                | 1130.5242               | b <sub>11</sub>                                               | 1833.8783 | y <sub>17</sub>                                 |
| 331.1389 <sup>+2</sup> | b <sub>6</sub> <sup>+2</sup>                                 | 593.293                | y <sub>5</sub>                                                | 834.3992               | y <sub>8</sub>                                                | 1145.6313               | b <sub>12</sub> -H <sub>3</sub> PO <sub>4</sub>               | 1834.9698 | y <sub>18</sub> -H <sub>3</sub> PO <sub>4</sub> |
| 339.6639 <sup>+2</sup> | b <sub>7</sub> -H <sub>3</sub> PO <sub>4</sub> <sup>+2</sup> | 615.8401 <sup>+2</sup> | y <sub>12</sub> <sup>+2</sup>                                 | 847.3346               | b <sub>8</sub>                                                | 1173.6514               | y <sub>11</sub>                                               | 1843.8626 | b <sub>18</sub>                                 |
| 369.1769 <sup>+2</sup> | y <sub>7</sub> <sup>+2</sup>                                 | 621.8457 <sup>+2</sup> | b <sub>13</sub> -H <sub>3</sub> PO <sub>4</sub> <sup>+2</sup> | 848.9007 <sup>+2</sup> | b <sub>17</sub> <sup>+2</sup>                                 | 1230.6729               | y <sub>12</sub>                                               | 1922.0018 | y <sub>19</sub> -H <sub>3</sub> PO <sub>4</sub> |
| 375.1825 <sup>+2</sup> | b <sub>8</sub> -H <sub>3</sub> PO <sub>4</sub> <sup>+2</sup> | 622.3078 <sup>+2</sup> | b <sub>12</sub> <sup>+2</sup>                                 | 848.9133 <sup>+2</sup> | y <sub>16</sub> <sup>+2</sup>                                 | 1242.6841               | b <sub>13</sub> -H <sub>3</sub> PO <sub>4</sub>               | 1930.8946 | b <sub>19</sub>                                 |
| 381.1881               | b <sub>4</sub>                                               | 650.3144               | y <sub>6</sub>                                                | 868.4543 <sup>+2</sup> | y <sub>17</sub> -H <sub>3</sub> PO <sub>4</sub> <sup>+2</sup> | 1243.6082               | b <sub>12</sub>                                               | 1932.9467 | y <sub>18</sub>                                 |
| 381.2132               | y <sub>3</sub>                                               | 651.3586 <sup>+2</sup> | y <sub>13</sub> <sup>+2</sup>                                 | 873.4465 <sup>+2</sup> | b <sub>18</sub> -H <sub>3</sub> PO <sub>4</sub> <sup>+2</sup> | 1301.71                 | y <sub>13</sub>                                               | 1979.0233 | MH-H <sub>3</sub> PO <sub>4</sub>               |
| 388.6524 <sup>+2</sup> | b <sub>7</sub> <sup>+2</sup>                                 | 661.2705               | b <sub>6</sub>                                                | 904.356                | b <sub>9</sub>                                                | 1329.7161               | b <sub>14</sub> -H <sub>3</sub> PO <sub>4</sub>               | 2019.9787 | y <sub>19</sub>                                 |
| 403.6932 <sup>+2</sup> | b <sub>9</sub> -H <sub>3</sub> PO <sub>4</sub> <sup>+2</sup> | 665.3617 <sup>+2</sup> | b <sub>14</sub> -H <sub>3</sub> PO <sub>4</sub> <sup>+2</sup> | 916.9625 <sup>+2</sup> | b <sub>19</sub> -H <sub>3</sub> PO <sub>4</sub> <sup>+2</sup> | 1340.661                | b <sub>13</sub>                                               | 2077.0002 | MH                                              |
| 417.7032 <sup>+2</sup> | y <sub>8</sub> <sup>+2</sup>                                 | 670.8341 <sup>+2</sup> | b <sub>13</sub> <sup>+2</sup>                                 | 917.4428 <sup>+2</sup> | y <sub>17</sub> <sup>+2</sup>                                 | 1386.7376               | b <sub>15</sub> -H <sub>3</sub> PO <sub>4</sub>               |           |                                                 |

MS/MS Fragmentation of QFsPTmSPTLSSITQGVPLDTSK  
 Found in IPI00375907, Hypothetical protein

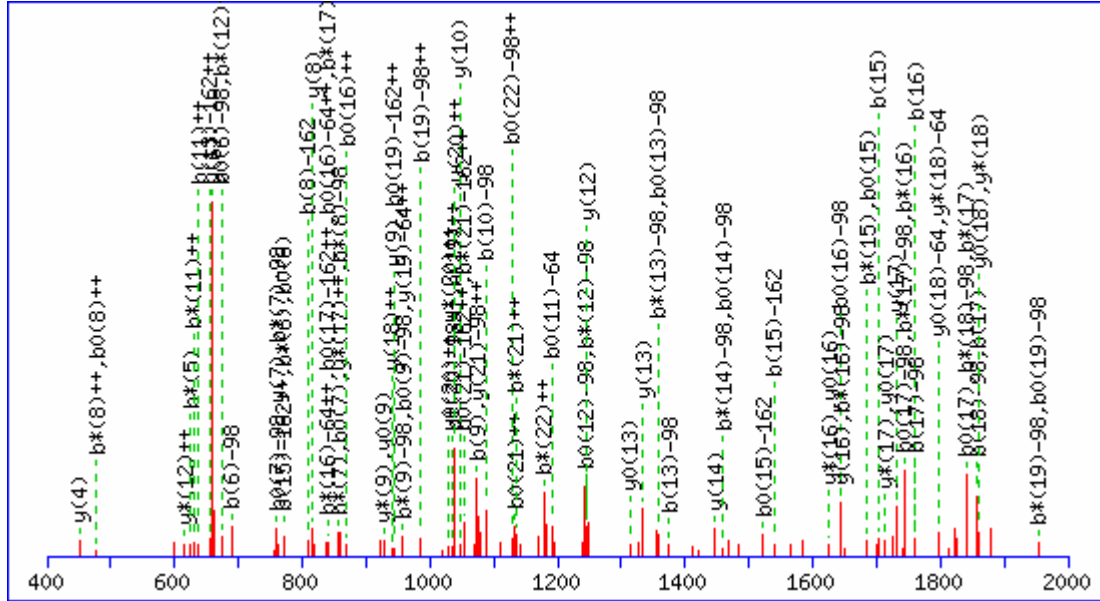

|                        |                                                |                        |                                                |                         |                                                               |           |                                                 |           |                                                 |
|------------------------|------------------------------------------------|------------------------|------------------------------------------------|-------------------------|---------------------------------------------------------------|-----------|-------------------------------------------------|-----------|-------------------------------------------------|
| 74.0600 <sup>+2</sup>  | y <sub>1</sub> <sup>+2</sup>                   | 543.2562               | b <sub>5</sub> -H <sub>3</sub> PO <sub>4</sub> | 944.5047                | y <sub>9</sub>                                                | 1273.517  | b <sub>11</sub>                                 | 1955.882  | b <sub>18</sub>                                 |
| 117.5761 <sup>+2</sup> | y <sub>2</sub> <sup>+2</sup>                   | 563.3035               | y <sub>5</sub>                                 | 972.3533                | b <sub>8</sub>                                                | 1332.7005 | y <sub>13</sub>                                 | 1970.9892 | b <sub>19</sub> -H <sub>3</sub> PO <sub>4</sub> |
| 147.1128               | y <sub>1</sub>                                 | 579.8219 <sup>+2</sup> | y <sub>11</sub> <sup>+2</sup>                  | 975.424                 | b <sub>9</sub> -H <sub>3</sub> PO <sub>4</sub>                | 1360.5491 | b <sub>12</sub>                                 | 1979.0001 | y <sub>19</sub>                                 |
| 168.0999 <sup>+2</sup> | y <sub>3</sub> <sup>+2</sup>                   | 623.3379 <sup>+2</sup> | y <sub>12</sub> <sup>+2</sup>                  | 990.0037 <sup>+2</sup>  | y <sub>19</sub> <sup>+2</sup>                                 | 1375.6562 | b <sub>13</sub> -H <sub>3</sub> PO <sub>4</sub> | 2068.9661 | b <sub>19</sub>                                 |
| 225.6134 <sup>+2</sup> | y <sub>4</sub> <sup>+2</sup>                   | 641.2331               | b <sub>5</sub>                                 | 1038.5301 <sup>+2</sup> | y <sub>20</sub> <sup>+2</sup>                                 | 1445.7846 | y <sub>14</sub>                                 | 2076.0529 | y <sub>20</sub>                                 |
| 234.1448               | y <sub>2</sub>                                 | 660.3563               | y <sub>6</sub>                                 | 1045.5524               | y <sub>10</sub>                                               | 1473.6331 | b <sub>13</sub>                                 | 2086.0161 | b <sub>20</sub> -H <sub>3</sub> PO <sub>4</sub> |
| 276.1343               | b <sub>2</sub>                                 | 666.8539 <sup>+2</sup> | y <sub>13</sub> <sup>+2</sup>                  | 1073.0408 <sup>+2</sup> | y <sub>21</sub> -H <sub>3</sub> PO <sub>4</sub> <sup>+2</sup> | 1476.7039 | b <sub>14</sub> -H <sub>3</sub> PO <sub>4</sub> | 2145.0744 | y <sub>21</sub> -H <sub>3</sub> PO <sub>4</sub> |
| 282.1554 <sup>+2</sup> | y <sub>5</sub> <sup>+2</sup>                   | 690.2916               | b <sub>6</sub> -H <sub>3</sub> PO <sub>4</sub> | 1073.4009               | b <sub>9</sub>                                                | 1546.8323 | y <sub>15</sub>                                 | 2183.993  | b <sub>20</sub>                                 |
| 330.6818 <sup>+2</sup> | y <sub>6</sub> <sup>+2</sup>                   | 723.3959 <sup>+2</sup> | y <sub>14</sub> <sup>+2</sup>                  | 1088.5081               | b <sub>10</sub> -H <sub>3</sub> PO <sub>4</sub>               | 1574.6808 | b <sub>14</sub>                                 | 2187.0638 | b <sub>21</sub> -H <sub>3</sub> PO <sub>4</sub> |
| 335.1925               | y <sub>3</sub>                                 | 759.4247               | y <sub>7</sub>                                 | 1122.0293 <sup>+2</sup> | y <sub>21</sub> <sup>+2</sup>                                 | 1604.7625 | b <sub>15</sub> -H <sub>3</sub> PO <sub>4</sub> | 2243.0513 | y <sub>21</sub>                                 |
| 345.1557               | b <sub>3</sub> -H <sub>3</sub> PO <sub>4</sub> | 773.9198 <sup>+2</sup> | y <sub>15</sub> <sup>+2</sup>                  | 1146.5750 <sup>+2</sup> | y <sub>22</sub> -H <sub>3</sub> PO <sub>4</sub> <sup>+2</sup> | 1643.885  | y <sub>16</sub>                                 | 2274.0958 | b <sub>22</sub> -H <sub>3</sub> PO <sub>4</sub> |
| 380.2160 <sup>+2</sup> | y <sub>7</sub> <sup>+2</sup>                   | 777.3236               | b <sub>7</sub> -H <sub>3</sub> PO <sub>4</sub> | 1158.6365               | y <sub>11</sub>                                               | 1661.7839 | b <sub>16</sub> -H <sub>3</sub> PO <sub>4</sub> | 2285.0407 | b <sub>21</sub>                                 |
| 408.7267 <sup>+2</sup> | y <sub>8</sub> <sup>+2</sup>                   | 788.2685               | b <sub>6</sub>                                 | 1175.5401               | b <sub>11</sub> -H <sub>3</sub> PO <sub>4</sub>               | 1702.7394 | b <sub>15</sub>                                 | 2292.1428 | y <sub>22</sub> -H <sub>3</sub> PO <sub>4</sub> |
| 442.2085               | b <sub>4</sub> -H <sub>3</sub> PO <sub>4</sub> | 816.4462               | y <sub>8</sub>                                 | 1186.485                | b <sub>10</sub>                                               | 1730.9171 | y <sub>17</sub>                                 | 2372.0727 | b <sub>22</sub>                                 |
| 443.1326               | b <sub>3</sub>                                 | 822.4462 <sup>+2</sup> | y <sub>16</sub> <sup>+2</sup>                  | 1195.5635 <sup>+2</sup> | y <sub>22</sub> <sup>+2</sup>                                 | 1759.7608 | b <sub>16</sub>                                 | 2390.1197 | y <sub>22</sub>                                 |
| 450.2195               | y <sub>4</sub>                                 | 865.9622 <sup>+2</sup> | y <sub>17</sub> <sup>+2</sup>                  | 1210.6043 <sup>+2</sup> | MH-H <sub>3</sub> PO <sub>4</sub> <sup>+2</sup>               | 1760.8524 | b <sub>17</sub> -H <sub>3</sub> PO <sub>4</sub> | 2420.2014 | MH-H <sub>3</sub> PO <sub>4</sub>               |
| 472.7560 <sup>+2</sup> | y <sub>9</sub> <sup>+2</sup>                   | 874.3764               | b <sub>8</sub> -H <sub>3</sub> PO <sub>4</sub> | 1245.6685               | y <sub>12</sub>                                               | 1857.9051 | b <sub>18</sub> -H <sub>3</sub> PO <sub>4</sub> | 2518.1783 | MH                                              |
| 523.2798 <sup>+2</sup> | y <sub>10</sub> <sup>+2</sup>                  | 875.3005               | b <sub>7</sub>                                 | 1259.5928 <sup>+2</sup> | MH <sup>+2</sup>                                              | 1858.8293 | b <sub>17</sub>                                 |           |                                                 |
| 540.1854               | b <sub>4</sub>                                 | 939.4799 <sup>+2</sup> | y <sub>18</sub> <sup>+2</sup>                  | 1262.5722               | b <sub>12</sub> -H <sub>3</sub> PO <sub>4</sub>               | 1877.9525 | y <sub>18</sub>                                 |           |                                                 |

MS/MS Fragmentation of RVPLsPLSLLAGPADAR  
 Found in IPI00375907, Hypothetical protein

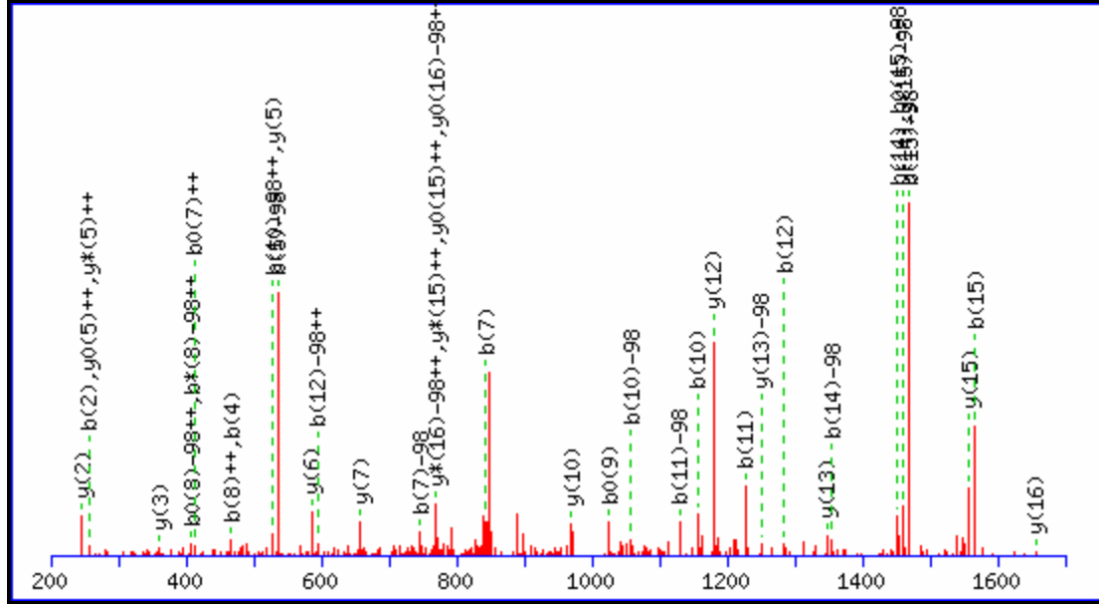

|                        |                                                              |                        |                                                               |                        |                                                               |                        |                                                 |           |                                                 |
|------------------------|--------------------------------------------------------------|------------------------|---------------------------------------------------------------|------------------------|---------------------------------------------------------------|------------------------|-------------------------------------------------|-----------|-------------------------------------------------|
| 88.0631 <sup>+2</sup>  | y <sub>1</sub> <sup>+2</sup>                                 | 385.7114 <sup>+2</sup> | y <sub>8</sub> <sup>+2</sup>                                  | 625.3486 <sup>+2</sup> | y <sub>13</sub> -H <sub>3</sub> PO <sub>4</sub> <sup>+2</sup> | 784.4158 <sup>+2</sup> | b <sub>15</sub> <sup>+2</sup>                   | 1283.7834 | b <sub>13</sub> -H <sub>3</sub> PO <sub>4</sub> |
| 123.5817 <sup>+2</sup> | y <sub>2</sub> <sup>+2</sup>                                 | 416.7556 <sup>+2</sup> | b <sub>8</sub> -H <sub>3</sub> PO <sub>4</sub> <sup>+2</sup>  | 632.3879               | b <sub>6</sub> -H <sub>3</sub> PO <sub>4</sub>                | 819.9344 <sup>+2</sup> | b <sub>16</sub> <sup>+2</sup>                   | 1284.7075 | b <sub>12</sub>                                 |
| 128.5920 <sup>+2</sup> | b <sub>2</sub> <sup>+2</sup>                                 | 422.2280 <sup>+2</sup> | b <sub>7</sub> <sup>+2</sup>                                  | 633.312                | b <sub>5</sub>                                                | 828.9397 <sup>+2</sup> | y <sub>16</sub> <sup>+2</sup>                   | 1347.6668 | y <sub>13</sub>                                 |
| 175.119                | y <sub>1</sub>                                               | 432.2201               | y <sub>4</sub>                                                | 642.3953 <sup>+2</sup> | b <sub>13</sub> -H <sub>3</sub> PO <sub>4</sub> <sup>+2</sup> | 832.5039               | b <sub>9</sub> -H <sub>3</sub> PO <sub>4</sub>  | 1354.8205 | b <sub>14</sub> -H <sub>3</sub> PO <sub>4</sub> |
| 177.1184 <sup>+2</sup> | b <sub>3</sub> <sup>+2</sup>                                 | 442.2534 <sup>+2</sup> | y <sub>9</sub> <sup>+2</sup>                                  | 642.8574 <sup>+2</sup> | b <sub>12</sub> <sup>+2</sup>                                 | 843.4488               | b <sub>7</sub>                                  | 1362.774  | y <sub>14</sub> -H <sub>3</sub> PO <sub>4</sub> |
| 181.0951 <sup>+2</sup> | y <sub>3</sub> <sup>+2</sup>                                 | 465.7441 <sup>+2</sup> | b <sub>8</sub> <sup>+2</sup>                                  | 657.3315               | y <sub>7</sub>                                                | 858.0018 <sup>+2</sup> | MH-H <sub>3</sub> PO <sub>4</sub> <sup>+2</sup> | 1381.7603 | b <sub>13</sub>                                 |
| 216.6137 <sup>+2</sup> | y <sub>4</sub> <sup>+2</sup>                                 | 466.3136               | b <sub>4</sub>                                                | 674.3370 <sup>+2</sup> | y <sub>13</sub> <sup>+2</sup>                                 | 883.4996               | y <sub>9</sub>                                  | 1452.7974 | b <sub>14</sub>                                 |
| 233.6605 <sup>+2</sup> | b <sub>4</sub> <sup>+2</sup>                                 | 473.2976 <sup>+2</sup> | b <sub>9</sub> -H <sub>3</sub> PO <sub>4</sub> <sup>+2</sup>  | 677.9139 <sup>+2</sup> | b <sub>14</sub> -H <sub>3</sub> PO <sub>4</sub> <sup>+2</sup> | 906.9902 <sup>+2</sup> | MH <sup>+2</sup>                                | 1459.8267 | y <sub>15</sub> -H <sub>3</sub> PO <sub>4</sub> |
| 246.1561               | y <sub>2</sub>                                               | 485.7694 <sup>+2</sup> | y <sub>10</sub> <sup>+2</sup>                                 | 681.8906 <sup>+2</sup> | y <sub>14</sub> -H <sub>3</sub> PO <sub>4</sub> <sup>+2</sup> | 930.4808               | b <sub>8</sub>                                  | 1460.7509 | y <sub>14</sub>                                 |
| 256.1768               | b <sub>2</sub>                                               | 522.2861 <sup>+2</sup> | b <sub>9</sub> <sup>+2</sup>                                  | 691.3838 <sup>+2</sup> | b <sub>13</sub> <sup>+2</sup>                                 | 945.588                | b <sub>9</sub> -H <sub>3</sub> PO <sub>4</sub>  | 1469.8475 | b <sub>15</sub> -H <sub>3</sub> PO <sub>4</sub> |
| 265.1401 <sup>+2</sup> | y <sub>5</sub> <sup>+2</sup>                                 | 529.2729               | y <sub>5</sub>                                                | 726.9024 <sup>+2</sup> | b <sub>14</sub> <sup>+2</sup>                                 | 970.5316               | y <sub>10</sub>                                 | 1540.8846 | b <sub>16</sub> -H <sub>3</sub> PO <sub>4</sub> |
| 268.1712 <sup>+2</sup> | b <sub>5</sub> -H <sub>3</sub> PO <sub>4</sub> <sup>+2</sup> | 529.8397 <sup>+2</sup> | b <sub>10</sub> -H <sub>3</sub> PO <sub>4</sub> <sup>+2</sup> | 730.3648               | b <sub>6</sub>                                                | 1043.5649              | b <sub>9</sub>                                  | 1557.8036 | y <sub>15</sub>                                 |
| 293.6508 <sup>+2</sup> | y <sub>6</sub> <sup>+2</sup>                                 | 535.3351               | b <sub>5</sub> -H <sub>3</sub> PO <sub>4</sub>                | 730.4170 <sup>+2</sup> | y <sub>15</sub> -H <sub>3</sub> PO <sub>4</sub> <sup>+2</sup> | 1058.6721              | b <sub>10</sub> -H <sub>3</sub> PO <sub>4</sub> | 1558.8952 | y <sub>16</sub> -H <sub>3</sub> PO <sub>4</sub> |
| 316.6976 <sup>+2</sup> | b <sub>6</sub> -H <sub>3</sub> PO <sub>4</sub> <sup>+2</sup> | 542.3115 <sup>+2</sup> | y <sub>11</sub> <sup>+2</sup>                                 | 730.8791 <sup>+2</sup> | y <sub>14</sub> <sup>+2</sup>                                 | 1083.6157              | y <sub>11</sub>                                 | 1567.8244 | b <sub>15</sub>                                 |
| 317.1596 <sup>+2</sup> | b <sub>5</sub> <sup>+2</sup>                                 | 565.3582 <sup>+2</sup> | b <sub>11</sub> -H <sub>3</sub> PO <sub>4</sub> <sup>+2</sup> | 735.4274 <sup>+2</sup> | b <sub>15</sub> -H <sub>3</sub> PO <sub>4</sub> <sup>+2</sup> | 1129.7092              | b <sub>11</sub> -H <sub>3</sub> PO <sub>4</sub> | 1638.8615 | b <sub>16</sub>                                 |
| 329.1694 <sup>+2</sup> | y <sub>7</sub> <sup>+2</sup>                                 | 578.8281 <sup>+2</sup> | b <sub>10</sub> <sup>+2</sup>                                 | 745.4719               | b <sub>7</sub> -H <sub>3</sub> PO <sub>4</sub>                | 1156.649               | b <sub>10</sub>                                 | 1656.872  | y <sub>16</sub>                                 |
| 353.2296               | b <sub>3</sub>                                               | 586.2944               | y <sub>6</sub>                                                | 770.4155               | y <sub>8</sub>                                                | 1180.6684              | y <sub>12</sub>                                 | 1714.9963 | MH-H <sub>3</sub> PO <sub>4</sub>               |
| 361.183                | y <sub>3</sub>                                               | 590.8379 <sup>+2</sup> | y <sub>12</sub> <sup>+2</sup>                                 | 770.9459 <sup>+2</sup> | b <sub>16</sub> -H <sub>3</sub> PO <sub>4</sub> <sup>+2</sup> | 1186.7307              | b <sub>12</sub> -H <sub>3</sub> PO <sub>4</sub> | 1812.9732 | MH                                              |
| 365.6860 <sup>+2</sup> | b <sub>6</sub> <sup>+2</sup>                                 | 593.8690 <sup>+2</sup> | b <sub>12</sub> -H <sub>3</sub> PO <sub>4</sub> <sup>+2</sup> | 779.4055 <sup>+2</sup> | y <sub>15</sub> <sup>+2</sup>                                 | 1227.6861              | b <sub>11</sub>                                 |           |                                                 |
| 373.2396 <sup>+2</sup> | b <sub>7</sub> -H <sub>3</sub> PO <sub>4</sub> <sup>+2</sup> | 614.3467 <sup>+2</sup> | b <sub>11</sub> <sup>+2</sup>                                 | 779.9512 <sup>+2</sup> | y <sub>16</sub> -H <sub>3</sub> PO <sub>4</sub> <sup>+2</sup> | 1249.6899              | y <sub>13</sub> -H <sub>3</sub> PO <sub>4</sub> |           |                                                 |

MS/MS Fragmentation of HGSGPNILTGDSPPGFSK  
 Found in IPI00375907, Hypothetical protein

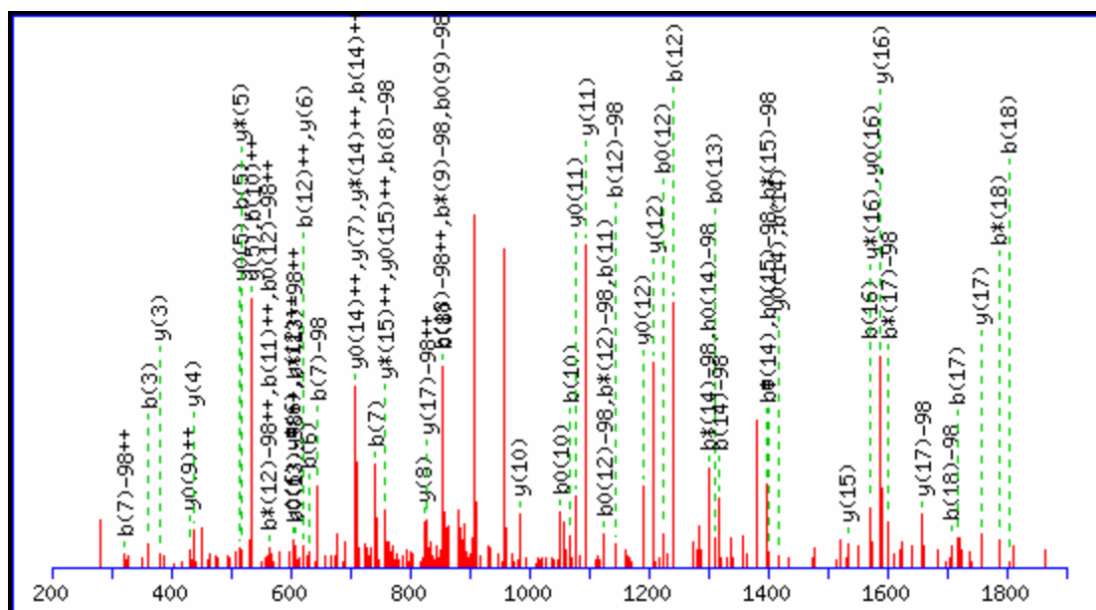

|                        |                                                              |                        |                                                               |                        |                                                               |                        |                                                               |           |                                                 |
|------------------------|--------------------------------------------------------------|------------------------|---------------------------------------------------------------|------------------------|---------------------------------------------------------------|------------------------|---------------------------------------------------------------|-----------|-------------------------------------------------|
| 74.0600 <sup>+2</sup>  | y <sub>1</sub> <sup>+2</sup>                                 | 362.086                | b <sub>3</sub>                                                | 604.8115 <sup>+2</sup> | y <sub>12</sub> <sup>+2</sup>                                 | 829.9229 <sup>+2</sup> | y <sub>17</sub> -H <sub>3</sub> PO <sub>4</sub> <sup>+2</sup> | 1242.5514 | b <sub>12</sub>                                 |
| 98.0475 <sup>+2</sup>  | b <sub>2</sub> <sup>+2</sup>                                 | 372.1473 <sup>+2</sup> | b <sub>7</sub> <sup>+2</sup>                                  | 616.3069 <sup>+2</sup> | b <sub>13</sub> -H <sub>3</sub> PO <sub>4</sub> <sup>+2</sup> | 853.9103 <sup>+2</sup> | b <sub>18</sub> -H <sub>3</sub> PO <sub>4</sub> <sup>+2</sup> | 1318.6386 | b <sub>14</sub> -H <sub>3</sub> PO <sub>4</sub> |
| 117.5761 <sup>+2</sup> | y <sub>2</sub> <sup>+2</sup>                                 | 379.7008 <sup>+2</sup> | b <sub>8</sub> -H <sub>3</sub> PO <sub>4</sub> <sup>+2</sup>  | 621.7794 <sup>+2</sup> | b <sub>12</sub> <sup>+2</sup>                                 | 856.3713               | b <sub>8</sub>                                                | 1321.6998 | y <sub>13</sub>                                 |
| 132.5582 <sup>+2</sup> | b <sub>3</sub> -H <sub>3</sub> PO <sub>4</sub> <sup>+2</sup> | 381.2132               | y <sub>3</sub>                                                | 622.3195               | y <sub>6</sub>                                                | 858.4336 <sup>+2</sup> | y <sub>18</sub> -H <sub>3</sub> PO <sub>4</sub> <sup>+2</sup> | 1329.5835 | b <sub>13</sub>                                 |
| 147.1128               | y <sub>1</sub>                                               | 412.6929 <sup>+2</sup> | y <sub>8</sub> <sup>+2</sup>                                  | 630.2032               | b <sub>6</sub>                                                | 859.3827 <sup>+2</sup> | b <sub>17</sub> <sup>+2</sup>                                 | 1415.6914 | b <sub>15</sub> -H <sub>3</sub> PO <sub>4</sub> |
| 161.0689 <sup>+2</sup> | b <sub>4</sub> -H <sub>3</sub> PO <sub>4</sub> <sup>+2</sup> | 418.1833               | b <sub>5</sub> -H <sub>3</sub> PO <sub>4</sub>                | 645.3103               | b <sub>7</sub> -H <sub>3</sub> PO <sub>4</sub>                | 871.4785               | b <sub>9</sub> -H <sub>3</sub> PO <sub>4</sub>                | 1416.6155 | b <sub>14</sub>                                 |
| 181.5466 <sup>+2</sup> | b <sub>3</sub> <sup>+2</sup>                                 | 419.1075               | b <sub>4</sub>                                                | 659.8229 <sup>+2</sup> | b <sub>14</sub> -H <sub>3</sub> PO <sub>4</sub> <sup>+2</sup> | 878.9113 <sup>+2</sup> | y <sub>17</sub> <sup>+2</sup>                                 | 1435.7427 | y <sub>14</sub>                                 |
| 191.1103 <sup>+2</sup> | y <sub>3</sub> <sup>+2</sup>                                 | 428.6893 <sup>+2</sup> | b <sub>8</sub> <sup>+2</sup>                                  | 661.3535 <sup>+2</sup> | y <sub>13</sub> <sup>+2</sup>                                 | 881.3999               | y <sub>9</sub>                                                | 1472.7128 | b <sub>16</sub> -H <sub>3</sub> PO <sub>4</sub> |
| 195.0877               | b <sub>2</sub>                                               | 436.2429 <sup>+2</sup> | b <sub>9</sub> -H <sub>3</sub> PO <sub>4</sub> <sup>+2</sup>  | 665.2954 <sup>+2</sup> | b <sub>13</sub> <sup>+2</sup>                                 | 902.8987 <sup>+2</sup> | b <sub>18</sub> <sup>+2</sup>                                 | 1513.6683 | b <sub>15</sub>                                 |
| 209.5953 <sup>+2</sup> | b <sub>5</sub> -H <sub>3</sub> PO <sub>4</sub> <sup>+2</sup> | 438.2347               | y <sub>4</sub>                                                | 708.3493 <sup>+2</sup> | b <sub>15</sub> -H <sub>3</sub> PO <sub>4</sub> <sup>+2</sup> | 907.4220 <sup>+2</sup> | y <sub>18</sub> <sup>+2</sup>                                 | 1532.7955 | y <sub>15</sub>                                 |
| 210.0574 <sup>+2</sup> | b <sub>4</sub> <sup>+2</sup>                                 | 441.2036 <sup>+2</sup> | y <sub>9</sub> <sup>+2</sup>                                  | 708.8114 <sup>+2</sup> | b <sub>14</sub> <sup>+2</sup>                                 | 926.9630 <sup>+2</sup> | MH-H <sub>3</sub> PO <sub>4</sub> <sup>+2</sup>               | 1570.6897 | b <sub>16</sub>                                 |
| 219.6210 <sup>+2</sup> | y <sub>4</sub> <sup>+2</sup>                                 | 485.2313 <sup>+2</sup> | b <sub>9</sub> <sup>+2</sup>                                  | 709.3515               | y <sub>7</sub>                                                | 969.4554               | b <sub>9</sub>                                                | 1589.817  | y <sub>16</sub>                                 |
| 234.1448               | y <sub>2</sub>                                               | 486.7667 <sup>+2</sup> | b <sub>10</sub> -H <sub>3</sub> PO <sub>4</sub> <sup>+2</sup> | 718.3750 <sup>+2</sup> | y <sub>14</sub> <sup>+2</sup>                                 | 972.5261               | b <sub>10</sub> -H <sub>3</sub> PO <sub>4</sub>               | 1619.7812 | b <sub>17</sub> -H <sub>3</sub> PO <sub>4</sub> |
| 258.5838 <sup>+2</sup> | b <sub>5</sub> <sup>+2</sup>                                 | 491.7274 <sup>+2</sup> | y <sub>10</sub> <sup>+2</sup>                                 | 736.8601 <sup>+2</sup> | b <sub>16</sub> -H <sub>3</sub> PO <sub>4</sub> <sup>+2</sup> | 975.9515 <sup>+2</sup> | MH <sup>+2</sup>                                              | 1658.8384 | y <sub>17</sub> -H <sub>3</sub> PO <sub>4</sub> |
| 264.1091               | b <sub>3</sub> -H <sub>3</sub> PO <sub>4</sub>               | 515.2774 <sup>+2</sup> | b <sub>11</sub> -H <sub>3</sub> PO <sub>4</sub> <sup>+2</sup> | 743.2872               | b <sub>7</sub>                                                | 982.4476               | y <sub>10</sub>                                               | 1706.8133 | b <sub>18</sub> -H <sub>3</sub> PO <sub>4</sub> |
| 266.6168 <sup>+2</sup> | b <sub>6</sub> -H <sub>3</sub> PO <sub>4</sub> <sup>+2</sup> | 516.1602               | b <sub>5</sub>                                                | 757.3378 <sup>+2</sup> | b <sub>15</sub> <sup>+2</sup>                                 | 1029.5476              | b <sub>11</sub> -H <sub>3</sub> PO <sub>4</sub>               | 1715.8599 | y <sub>18</sub> -H <sub>3</sub> PO <sub>4</sub> |
| 268.1474 <sup>+2</sup> | y <sub>5</sub> <sup>+2</sup>                                 | 532.2263               | b <sub>6</sub> -H <sub>3</sub> PO <sub>4</sub>                | 758.3944               | b <sub>8</sub> -H <sub>3</sub> PO <sub>4</sub>                | 1070.503               | b <sub>10</sub>                                               | 1717.7581 | b <sub>17</sub>                                 |
| 311.6634 <sup>+2</sup> | y <sub>6</sub> <sup>+2</sup>                                 | 535.2875               | y <sub>5</sub>                                                | 766.9014 <sup>+2</sup> | y <sub>15</sub> <sup>+2</sup>                                 | 1095.5317              | y <sub>11</sub>                                               | 1756.8153 | y <sub>17</sub>                                 |
| 315.6052 <sup>+2</sup> | b <sub>6</sub> <sup>+2</sup>                                 | 535.7552 <sup>+2</sup> | b <sub>10</sub> <sup>+2</sup>                                 | 785.8485 <sup>+2</sup> | b <sub>16</sub> <sup>+2</sup>                                 | 1127.5245              | b <sub>11</sub>                                               | 1804.7902 | b <sub>18</sub>                                 |
| 321.1306               | b <sub>4</sub> -H <sub>3</sub> PO <sub>4</sub>               | 548.2695 <sup>+2</sup> | y <sub>11</sub> <sup>+2</sup>                                 | 795.4121 <sup>+2</sup> | y <sub>16</sub> <sup>+2</sup>                                 | 1144.5745              | b <sub>12</sub> -H <sub>3</sub> PO <sub>4</sub>               | 1813.8368 | y <sub>18</sub>                                 |
| 323.1588 <sup>+2</sup> | b <sub>7</sub> -H <sub>3</sub> PO <sub>4</sub> <sup>+2</sup> | 564.2659 <sup>+2</sup> | b <sub>11</sub> <sup>+2</sup>                                 | 810.3943 <sup>+2</sup> | b <sub>17</sub> -H <sub>3</sub> PO <sub>4</sub> <sup>+2</sup> | 1208.6157              | y <sub>12</sub>                                               | 1852.9188 | MH-H <sub>3</sub> PO <sub>4</sub>               |
| 355.1794 <sup>+2</sup> | y <sub>7</sub> <sup>+2</sup>                                 | 572.7909 <sup>+2</sup> | b <sub>12</sub> -H <sub>3</sub> PO <sub>4</sub> <sup>+2</sup> | 824.3785               | y <sub>8</sub>                                                | 1231.6066              | b <sub>13</sub> -H <sub>3</sub> PO <sub>4</sub>               | 1950.8957 | MH                                              |

MS/MS Fragmentation of KTG<sub>s</sub>YGALAEITASK  
 Found in IPI00397730, Isoform 4 of Protein phosphatase 1 regulatory subunit 12A

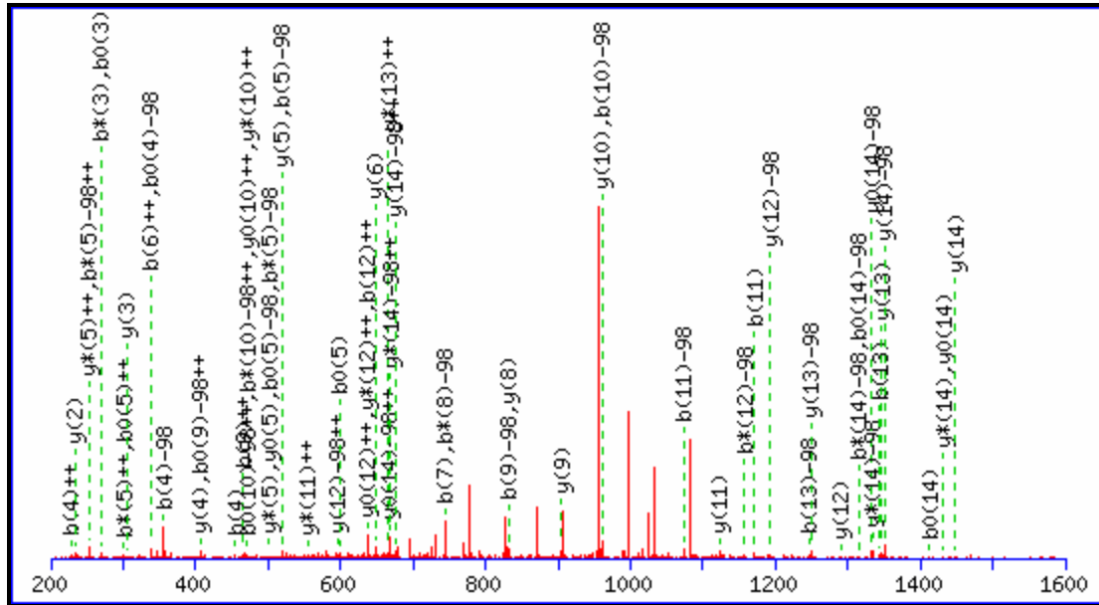

|                        |                                                              |                        |                                                               |                        |                                                               |                        |                                                 |           |                                                 |
|------------------------|--------------------------------------------------------------|------------------------|---------------------------------------------------------------|------------------------|---------------------------------------------------------------|------------------------|-------------------------------------------------|-----------|-------------------------------------------------|
| 74.0600 <sup>+2</sup>  | y <sub>1</sub> <sup>+2</sup>                                 | 324.6818 <sup>+2</sup> | y <sub>6</sub> <sup>+2</sup>                                  | 537.2849 <sup>+2</sup> | b <sub>11</sub> -H <sub>3</sub> PO <sub>4</sub> <sup>+2</sup> | 715.8318 <sup>+2</sup> | b <sub>14</sub> <sup>+2</sup>                   | 1174.6103 | b <sub>12</sub> -H <sub>3</sub> PO <sub>4</sub> |
| 115.5786 <sup>+2</sup> | b <sub>2</sub> <sup>+2</sup>                                 | 337.6309 <sup>+2</sup> | b <sub>6</sub> <sup>+2</sup>                                  | 562.3033 <sup>+2</sup> | y <sub>11</sub> <sup>+2</sup>                                 | 719.3934               | y <sub>7</sub>                                  | 1192.6208 | y <sub>12</sub> -H <sub>3</sub> PO <sub>4</sub> |
| 117.5761 <sup>+2</sup> | y <sub>2</sub> <sup>+2</sup>                                 | 356.1928               | b <sub>4</sub> -H <sub>3</sub> PO <sub>4</sub>                | 576.2776               | b <sub>6</sub> -H <sub>3</sub> PO <sub>4</sub>                | 724.8371 <sup>+2</sup> | y <sub>14</sub> <sup>+2</sup>                   | 1245.6474 | b <sub>13</sub> -H <sub>3</sub> PO <sub>4</sub> |
| 144.0893 <sup>+2</sup> | b <sub>3</sub> <sup>+2</sup>                                 | 360.2003 <sup>+2</sup> | y <sub>7</sub> <sup>+2</sup>                                  | 586.2734 <sup>+2</sup> | b <sub>11</sub> <sup>+2</sup>                                 | 739.8961 <sup>+2</sup> | MH-H <sub>3</sub> PO <sub>4</sub> <sup>+2</sup> | 1249.6423 | y <sub>13</sub> -H <sub>3</sub> PO <sub>4</sub> |
| 147.1128               | y <sub>1</sub>                                               | 373.1495 <sup>+2</sup> | b <sub>7</sub> <sup>+2</sup>                                  | 587.8088 <sup>+2</sup> | b <sub>12</sub> -H <sub>3</sub> PO <sub>4</sub> <sup>+2</sup> | 745.2916               | b <sub>7</sub>                                  | 1272.5872 | b <sub>12</sub>                                 |
| 153.0946 <sup>+2</sup> | y <sub>3</sub> <sup>+2</sup>                                 | 380.7030 <sup>+2</sup> | b <sub>8</sub> -H <sub>3</sub> PO <sub>4</sub> <sup>+2</sup>  | 596.8141 <sup>+2</sup> | y <sub>12</sub> -H <sub>3</sub> PO <sub>4</sub> <sup>+2</sup> | 760.3988               | b <sub>8</sub> -H <sub>3</sub> PO <sub>4</sub>  | 1290.5977 | y <sub>12</sub>                                 |
| 178.6001 <sup>+2</sup> | b <sub>1</sub> -H <sub>3</sub> PO <sub>4</sub> <sup>+2</sup> | 406.2296               | y <sub>4</sub>                                                | 617.2331               | b <sub>5</sub>                                                | 788.8846 <sup>+2</sup> | MH <sup>+2</sup>                                | 1332.6794 | b <sub>14</sub> -H <sub>3</sub> PO <sub>4</sub> |
| 203.6185 <sup>+2</sup> | y <sub>4</sub> <sup>+2</sup>                                 | 416.2216 <sup>+2</sup> | b <sub>9</sub> -H <sub>3</sub> PO <sub>4</sub> <sup>+2</sup>  | 623.3273 <sup>+2</sup> | b <sub>13</sub> -H <sub>3</sub> PO <sub>4</sub> <sup>+2</sup> | 831.4359               | b <sub>9</sub> -H <sub>3</sub> PO <sub>4</sub>  | 1343.6243 | b <sub>13</sub>                                 |
| 227.5885 <sup>+2</sup> | b <sub>4</sub> <sup>+2</sup>                                 | 416.7424 <sup>+2</sup> | y <sub>8</sub> <sup>+2</sup>                                  | 625.3248 <sup>+2</sup> | y <sub>13</sub> -H <sub>3</sub> PO <sub>4</sub> <sup>+2</sup> | 832.4775               | y <sub>8</sub>                                  | 1347.6192 | y <sub>13</sub>                                 |
| 230.1499               | b <sub>2</sub>                                               | 429.6915 <sup>+2</sup> | b <sub>8</sub> <sup>+2</sup>                                  | 636.7972 <sup>+2</sup> | b <sub>12</sub> <sup>+2</sup>                                 | 858.3757               | b <sub>8</sub>                                  | 1350.69   | y <sub>14</sub> -H <sub>3</sub> PO <sub>4</sub> |
| 234.1448               | y <sub>2</sub>                                               | 452.2609 <sup>+2</sup> | y <sub>9</sub> <sup>+2</sup>                                  | 645.8025 <sup>+2</sup> | y <sub>12</sub> <sup>+2</sup>                                 | 903.5146               | y <sub>9</sub>                                  | 1430.6563 | b <sub>14</sub>                                 |
| 260.1317 <sup>+2</sup> | b <sub>5</sub> -H <sub>3</sub> PO <sub>4</sub> <sup>+2</sup> | 454.1697               | b <sub>4</sub>                                                | 647.3148               | b <sub>7</sub> -H <sub>3</sub> PO <sub>4</sub>                | 929.4128               | b <sub>9</sub>                                  | 1448.6669 | y <sub>14</sub>                                 |
| 260.1605 <sup>+2</sup> | y <sub>5</sub> <sup>+2</sup>                                 | 465.2101 <sup>+2</sup> | b <sub>9</sub> <sup>+2</sup>                                  | 648.3563               | y <sub>6</sub>                                                | 960.4785               | b <sub>10</sub> -H <sub>3</sub> PO <sub>4</sub> | 1478.7849 | MH-H <sub>3</sub> PO <sub>4</sub>               |
| 287.1714               | b <sub>3</sub>                                               | 480.7429 <sup>+2</sup> | b <sub>10</sub> -H <sub>3</sub> PO <sub>4</sub> <sup>+2</sup> | 666.8433 <sup>+2</sup> | b <sub>14</sub> -H <sub>3</sub> PO <sub>4</sub> <sup>+2</sup> | 960.536                | y <sub>10</sub>                                 | 1576.7618 | MH                                              |
| 288.6425 <sup>+2</sup> | b <sub>6</sub> -H <sub>3</sub> PO <sub>4</sub> <sup>+2</sup> | 480.7717 <sup>+2</sup> | y <sub>10</sub> <sup>+2</sup>                                 | 672.3158 <sup>+2</sup> | b <sub>13</sub> <sup>+2</sup>                                 | 1058.4554              | b <sub>10</sub>                                 |           |                                                 |
| 305.1819               | y <sub>3</sub>                                               | 519.2562               | b <sub>5</sub> -H <sub>3</sub> PO <sub>4</sub>                | 674.2545               | b <sub>6</sub>                                                | 1073.5626              | b <sub>11</sub> -H <sub>3</sub> PO <sub>4</sub> |           |                                                 |
| 309.1202 <sup>+2</sup> | b <sub>5</sub> <sup>+2</sup>                                 | 519.3137               | y <sub>5</sub>                                                | 674.3132 <sup>+2</sup> | y <sub>13</sub> <sup>+2</sup>                                 | 1123.5994              | y <sub>11</sub>                                 |           |                                                 |
| 324.1610 <sup>+2</sup> | b <sub>7</sub> -H <sub>3</sub> PO <sub>4</sub> <sup>+2</sup> | 529.7313 <sup>+2</sup> | b <sub>10</sub> <sup>+2</sup>                                 | 675.8486 <sup>+2</sup> | y <sub>14</sub> -H <sub>3</sub> PO <sub>4</sub> <sup>+2</sup> | 1171.5395              | b <sub>11</sub>                                 |           |                                                 |



MS/MS Fragmentation of KtGSYGALAEITASK  
 Found in IPI00397730, Isoform 4 of Protein phosphatase 1 regulatory subunit 12A

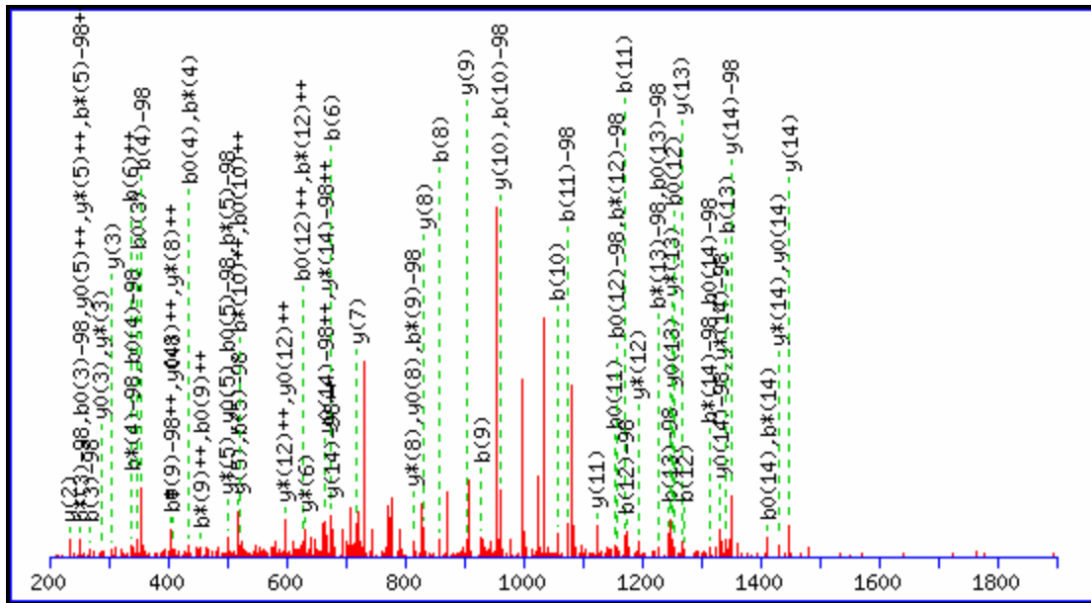

|                        |                                                              |                        |                                                               |                        |                                                               |                        |                                                               |           |                                                 |
|------------------------|--------------------------------------------------------------|------------------------|---------------------------------------------------------------|------------------------|---------------------------------------------------------------|------------------------|---------------------------------------------------------------|-----------|-------------------------------------------------|
| 74.0600 <sup>+2</sup>  | y <sub>1</sub> <sup>+2</sup>                                 | 309.1202 <sup>+2</sup> | b <sub>5</sub> <sup>+2</sup>                                  | 480.7717 <sup>+2</sup> | y <sub>10</sub> <sup>+2</sup>                                 | 674.2545               | b <sub>6</sub>                                                | 1123.5994 | y <sub>11</sub>                                 |
| 106.5733 <sup>+2</sup> | b <sub>2</sub> -H <sub>3</sub> PO <sub>4</sub> <sup>+2</sup> | 310.1162               | b <sub>2</sub>                                                | 519.2562               | b <sub>5</sub> -H <sub>3</sub> PO <sub>4</sub>                | 675.8486 <sup>+2</sup> | y <sub>14</sub> -H <sub>3</sub> PO <sub>4</sub> <sup>+2</sup> | 1171.5395 | b <sub>11</sub>                                 |
| 117.5761 <sup>+2</sup> | y <sub>2</sub> <sup>+2</sup>                                 | 324.1610 <sup>+2</sup> | b <sub>7</sub> -H <sub>3</sub> PO <sub>4</sub> <sup>+2</sup>  | 519.3137               | y <sub>5</sub>                                                | 715.8318 <sup>+2</sup> | b <sub>14</sub> <sup>+2</sup>                                 | 1174.6103 | b <sub>12</sub> -H <sub>3</sub> PO <sub>4</sub> |
| 135.0840 <sup>+2</sup> | b <sub>3</sub> -H <sub>3</sub> PO <sub>4</sub> <sup>+2</sup> | 324.6818 <sup>+2</sup> | y <sub>6</sub> <sup>+2</sup>                                  | 529.7313 <sup>+2</sup> | b <sub>10</sub> <sup>+2</sup>                                 | 719.3934               | y <sub>7</sub>                                                | 1210.6314 | y <sub>12</sub>                                 |
| 147.1128               | y <sub>1</sub>                                               | 337.6309 <sup>+2</sup> | b <sub>6</sub> <sup>+2</sup>                                  | 537.2849 <sup>+2</sup> | b <sub>11</sub> -H <sub>3</sub> PO <sub>4</sub> <sup>+2</sup> | 724.8371 <sup>+2</sup> | y <sub>14</sub> <sup>+2</sup>                                 | 1245.6474 | b <sub>13</sub> -H <sub>3</sub> PO <sub>4</sub> |
| 153.0946 <sup>+2</sup> | y <sub>3</sub> <sup>+2</sup>                                 | 356.1928               | b <sub>4</sub> -H <sub>3</sub> PO <sub>4</sub>                | 562.3033 <sup>+2</sup> | y <sub>11</sub> <sup>+2</sup>                                 | 739.8961 <sup>+2</sup> | MH-H <sub>3</sub> PO <sub>4</sub> <sup>+2</sup>               | 1267.6529 | y <sub>13</sub>                                 |
| 155.5618 <sup>+2</sup> | b <sub>2</sub> <sup>+2</sup>                                 | 360.2003 <sup>+2</sup> | y <sub>7</sub> <sup>+2</sup>                                  | 576.2776               | b <sub>6</sub> -H <sub>3</sub> PO <sub>4</sub>                | 745.2916               | b <sub>7</sub>                                                | 1272.5872 | b <sub>12</sub>                                 |
| 178.6001 <sup>+2</sup> | b <sub>4</sub> -H <sub>3</sub> PO <sub>4</sub> <sup>+2</sup> | 367.1377               | b <sub>3</sub>                                                | 586.2734 <sup>+2</sup> | b <sub>11</sub> <sup>+2</sup>                                 | 760.3988               | b <sub>8</sub> -H <sub>3</sub> PO <sub>4</sub>                | 1332.6794 | b <sub>14</sub> -H <sub>3</sub> PO <sub>4</sub> |
| 184.0725 <sup>+2</sup> | b <sub>3</sub> <sup>+2</sup>                                 | 373.1495 <sup>+2</sup> | b <sub>7</sub> <sup>+2</sup>                                  | 587.8088 <sup>+2</sup> | b <sub>12</sub> -H <sub>3</sub> PO <sub>4</sub> <sup>+2</sup> | 788.8846 <sup>+2</sup> | MH <sup>+2</sup>                                              | 1343.6243 | b <sub>13</sub>                                 |
| 203.6185 <sup>+2</sup> | y <sub>4</sub> <sup>+2</sup>                                 | 380.7030 <sup>+2</sup> | b <sub>8</sub> -H <sub>3</sub> PO <sub>4</sub> <sup>+2</sup>  | 605.8193 <sup>+2</sup> | y <sub>12</sub> <sup>+2</sup>                                 | 831.4359               | b <sub>9</sub> -H <sub>3</sub> PO <sub>4</sub>                | 1350.69   | y <sub>14</sub> -H <sub>3</sub> PO <sub>4</sub> |
| 212.1394               | b <sub>2</sub> -H <sub>3</sub> PO <sub>4</sub>               | 406.2296               | y <sub>4</sub>                                                | 617.2331               | b <sub>5</sub>                                                | 832.4775               | y <sub>8</sub>                                                | 1430.6563 | b <sub>14</sub>                                 |
| 227.5885 <sup>+2</sup> | b <sub>4</sub> <sup>+2</sup>                                 | 416.2216 <sup>+2</sup> | b <sub>9</sub> -H <sub>3</sub> PO <sub>4</sub> <sup>+2</sup>  | 623.3273 <sup>+2</sup> | b <sub>13</sub> -H <sub>3</sub> PO <sub>4</sub> <sup>+2</sup> | 858.3757               | b <sub>8</sub>                                                | 1448.6669 | y <sub>14</sub>                                 |
| 234.1448               | y <sub>2</sub>                                               | 416.7424 <sup>+2</sup> | y <sub>8</sub> <sup>+2</sup>                                  | 634.3301 <sup>+2</sup> | y <sub>13</sub> <sup>+2</sup>                                 | 903.5146               | y <sub>9</sub>                                                | 1478.7849 | MH-H <sub>3</sub> PO <sub>4</sub>               |
| 260.1317 <sup>+2</sup> | b <sub>5</sub> -H <sub>3</sub> PO <sub>4</sub> <sup>+2</sup> | 429.6915 <sup>+2</sup> | b <sub>8</sub> <sup>+2</sup>                                  | 636.7972 <sup>+2</sup> | b <sub>12</sub> <sup>+2</sup>                                 | 929.4128               | b <sub>9</sub>                                                | 1576.7618 | MH                                              |
| 260.1605 <sup>+2</sup> | y <sub>5</sub> <sup>+2</sup>                                 | 452.2609 <sup>+2</sup> | y <sub>9</sub> <sup>+2</sup>                                  | 647.3148               | b <sub>7</sub> -H <sub>3</sub> PO <sub>4</sub>                | 960.4785               | b <sub>10</sub> -H <sub>3</sub> PO <sub>4</sub>               |           |                                                 |
| 269.1608               | b <sub>3</sub> -H <sub>3</sub> PO <sub>4</sub>               | 454.1697               | b <sub>4</sub>                                                | 648.3563               | y <sub>6</sub>                                                | 960.536                | y <sub>10</sub>                                               |           |                                                 |
| 288.6425 <sup>+2</sup> | b <sub>6</sub> -H <sub>3</sub> PO <sub>4</sub> <sup>+2</sup> | 465.2101 <sup>+2</sup> | b <sub>9</sub> <sup>+2</sup>                                  | 666.8433 <sup>+2</sup> | b <sub>14</sub> -H <sub>3</sub> PO <sub>4</sub> <sup>+2</sup> | 1058.4554              | b <sub>10</sub>                                               |           |                                                 |
| 305.1819               | y <sub>3</sub>                                               | 480.7429 <sup>+2</sup> | b <sub>10</sub> -H <sub>3</sub> PO <sub>4</sub> <sup>+2</sup> | 672.3158 <sup>+2</sup> | b <sub>13</sub> <sup>+2</sup>                                 | 1073.5626              | b <sub>11</sub> -H <sub>3</sub> PO <sub>4</sub>               |           |                                                 |

MS/MS Fragmentation of StQGVTLTDLQEAEK  
 Found in IPI00397730, Isoform 4 of Protein phosphatase 1 regulatory subunit 12A

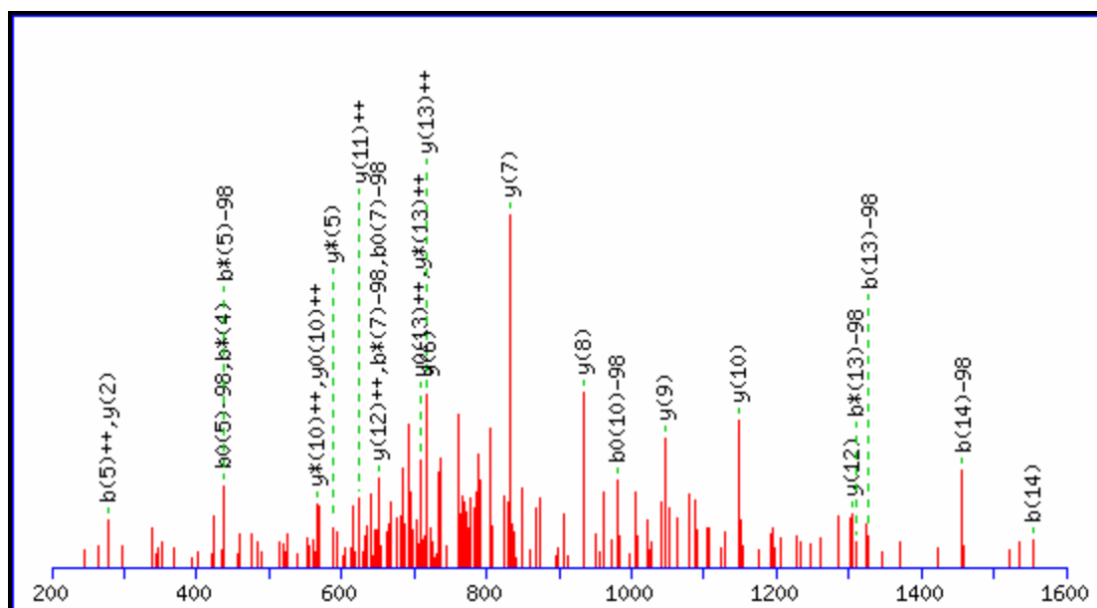

|                        |                                                |                        |                                                |                        |                                                               |                        |                                                 |           |                                                 |
|------------------------|------------------------------------------------|------------------------|------------------------------------------------|------------------------|---------------------------------------------------------------|------------------------|-------------------------------------------------|-----------|-------------------------------------------------|
| 74.0600 <sup>+2</sup>  | y <sub>1</sub> <sup>+2</sup>                   | 359.1925 <sup>+2</sup> | y <sub>6</sub> <sup>+2</sup>                   | 623.8299 <sup>+2</sup> | y <sub>11</sub> <sup>+2</sup>                                 | 850.3929 <sup>+2</sup> | MH <sup>+2</sup>                                | 1255.6165 | b <sub>12</sub> -H <sub>3</sub> PO <sub>4</sub> |
| 138.5813 <sup>+2</sup> | y <sub>2</sub> <sup>+2</sup>                   | 397.1119               | b <sub>3</sub>                                 | 652.3406 <sup>+2</sup> | y <sub>12</sub> <sup>+2</sup>                                 | 868.3812               | b <sub>8</sub>                                  | 1303.674  | y <sub>12</sub>                                 |
| 147.1128               | y <sub>1</sub>                                 | 416.7060 <sup>+2</sup> | y <sub>7</sub> <sup>+2</sup>                   | 654.2494               | b <sub>6</sub>                                                | 885.4312               | b <sub>9</sub> -H <sub>3</sub> PO <sub>4</sub>  | 1326.6536 | b <sub>13</sub> -H <sub>3</sub> PO <sub>4</sub> |
| 171.0764               | b <sub>2</sub> -H <sub>3</sub> PO <sub>4</sub> | 454.1334               | b <sub>4</sub>                                 | 669.3566               | b <sub>7</sub> -H <sub>3</sub> PO <sub>4</sub>                | 933.4524               | y <sub>8</sub>                                  | 1353.5934 | b <sub>12</sub>                                 |
| 174.0999 <sup>+2</sup> | y <sub>3</sub> <sup>+2</sup>                   | 455.2249               | b <sub>5</sub> -H <sub>3</sub> PO <sub>4</sub> | 716.3699 <sup>+2</sup> | y <sub>13</sub> <sup>+2</sup>                                 | 983.4081               | b <sub>9</sub>                                  | 1424.6305 | b <sub>13</sub>                                 |
| 238.6212 <sup>+2</sup> | y <sub>4</sub> <sup>+2</sup>                   | 467.2298 <sup>+2</sup> | y <sub>8</sub> <sup>+2</sup>                   | 717.3777               | y <sub>6</sub>                                                | 998.5153               | b <sub>10</sub> -H <sub>3</sub> PO <sub>4</sub> | 1431.7326 | y <sub>13</sub>                                 |
| 269.0533               | b <sub>2</sub>                                 | 476.2351               | y <sub>4</sub>                                 | 757.8885 <sup>+2</sup> | y <sub>14</sub> -H <sub>3</sub> PO <sub>4</sub> <sup>+2</sup> | 1046.5364              | y <sub>9</sub>                                  | 1455.6962 | b <sub>14</sub> -H <sub>3</sub> PO <sub>4</sub> |
| 276.1554               | y <sub>2</sub>                                 | 523.7719 <sup>+2</sup> | y <sub>9</sub> <sup>+2</sup>                   | 767.3335               | b <sub>7</sub>                                                | 1096.4922              | b <sub>10</sub>                                 | 1514.7697 | y <sub>14</sub> -H <sub>3</sub> PO <sub>4</sub> |
| 299.135                | b <sub>3</sub> -H <sub>3</sub> PO <sub>4</sub> | 553.2018               | b <sub>5</sub>                                 | 770.4043               | b <sub>8</sub> -H <sub>3</sub> PO <sub>4</sub>                | 1126.5739              | b <sub>11</sub> -H <sub>3</sub> PO <sub>4</sub> | 1553.6731 | b <sub>14</sub>                                 |
| 302.6505 <sup>+2</sup> | y <sub>5</sub> <sup>+2</sup>                   | 556.2726               | b <sub>6</sub> -H <sub>3</sub> PO <sub>4</sub> | 801.4045 <sup>+2</sup> | MH-H <sub>3</sub> PO <sub>4</sub> <sup>+2</sup>               | 1147.5841              | y <sub>10</sub>                                 | 1601.8017 | MH-H <sub>3</sub> PO <sub>4</sub>               |
| 347.1925               | y <sub>3</sub>                                 | 574.2957 <sup>+2</sup> | y <sub>10</sub> <sup>+2</sup>                  | 806.8769 <sup>+2</sup> | y <sub>14</sub> <sup>+2</sup>                                 | 1224.5508              | b <sub>11</sub>                                 | 1612.7466 | y <sub>14</sub>                                 |
| 356.1565               | b <sub>4</sub> -H <sub>3</sub> PO <sub>4</sub> | 604.2937               | y <sub>5</sub>                                 | 832.4047               | y <sub>7</sub>                                                | 1246.6525              | y <sub>11</sub>                                 | 1699.7786 | MH                                              |

MS/MS Fragmentation of RLAsTSDIEEKENR  
 Found in IPI00397730, Isoform 4 of Protein phosphatase 1 regulatory subunit 12A

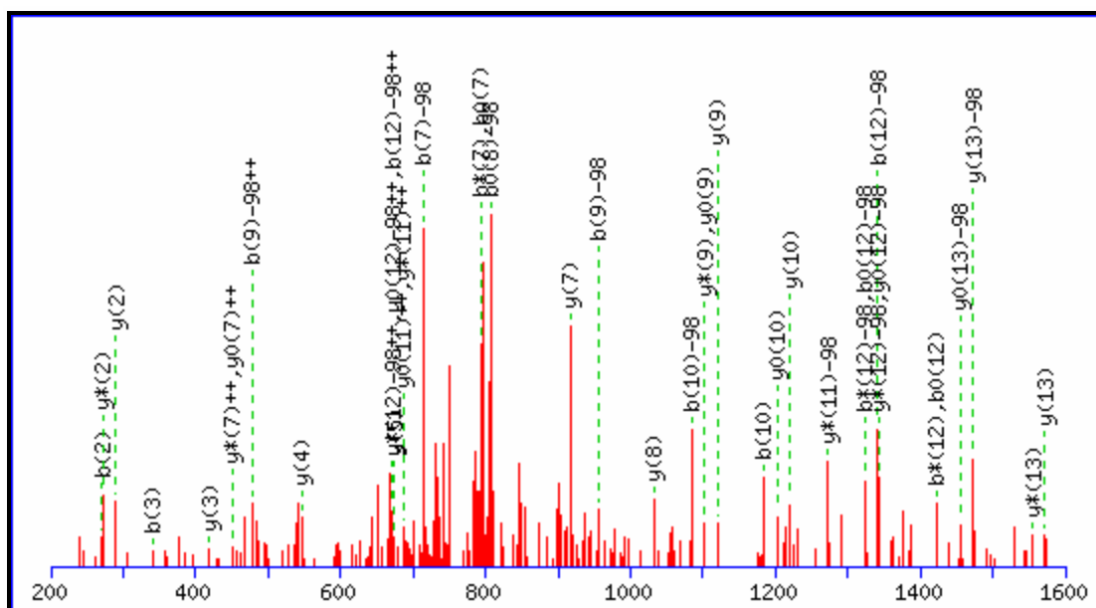

|                        |                                                              |                        |                                                               |                        |                                                               |                        |                                                               |           |                                                 |
|------------------------|--------------------------------------------------------------|------------------------|---------------------------------------------------------------|------------------------|---------------------------------------------------------------|------------------------|---------------------------------------------------------------|-----------|-------------------------------------------------|
| 88.0631 <sup>+2</sup>  | y <sub>1</sub> <sup>+2</sup>                                 | 348.6575 <sup>+2</sup> | b <sub>6</sub> <sup>+2</sup>                                  | 560.2675 <sup>+2</sup> | y <sub>9</sub> <sup>+2</sup>                                  | 729.8090 <sup>+2</sup> | y <sub>12</sub> <sup>+2</sup>                                 | 1182.5038 | b <sub>10</sub>                                 |
| 135.5999 <sup>+2</sup> | b <sub>2</sub> <sup>+2</sup>                                 | 357.1825 <sup>+2</sup> | b <sub>7</sub> -H <sub>3</sub> PO <sub>4</sub> <sup>+2</sup>  | 591.7556 <sup>+2</sup> | b <sub>10</sub> <sup>+2</sup>                                 | 737.3626 <sup>+2</sup> | y <sub>13</sub> -H <sub>3</sub> PO <sub>4</sub> <sup>+2</sup> | 1212.6219 | b <sub>11</sub> -H <sub>3</sub> PO <sub>4</sub> |
| 145.0846 <sup>+2</sup> | y <sub>2</sub> <sup>+2</sup>                                 | 402.6959 <sup>+2</sup> | y <sub>6</sub> <sup>+2</sup>                                  | 598.3307               | b <sub>6</sub> -H <sub>3</sub> PO <sub>4</sub>                | 777.3458 <sup>+2</sup> | b <sub>13</sub> <sup>+2</sup>                                 | 1220.5753 | y <sub>10</sub>                                 |
| 171.1184 <sup>+2</sup> | b <sub>3</sub> <sup>+2</sup>                                 | 406.1709 <sup>+2</sup> | b <sub>7</sub> <sup>+2</sup>                                  | 606.8146 <sup>+2</sup> | b <sub>11</sub> -H <sub>3</sub> PO <sub>4</sub> <sup>+2</sup> | 786.3511 <sup>+2</sup> | y <sub>13</sub> <sup>+2</sup>                                 | 1289.5968 | y <sub>11</sub> -H <sub>3</sub> PO <sub>4</sub> |
| 175.119                | y <sub>1</sub>                                               | 410.251                | b <sub>4</sub> -H <sub>3</sub> PO <sub>4</sub>                | 609.2756               | b <sub>5</sub>                                                | 804.3846               | y <sub>6</sub>                                                | 1310.5988 | b <sub>11</sub>                                 |
| 205.6292 <sup>+2</sup> | b <sub>4</sub> -H <sub>3</sub> PO <sub>4</sub> <sup>+2</sup> | 413.7245 <sup>+2</sup> | b <sub>8</sub> -H <sub>3</sub> PO <sub>4</sub> <sup>+2</sup>  | 610.7913 <sup>+2</sup> | y <sub>10</sub> <sup>+2</sup>                                 | 811.3346               | b <sub>7</sub>                                                | 1341.6645 | b <sub>12</sub> -H <sub>3</sub> PO <sub>4</sub> |
| 209.6059 <sup>+2</sup> | y <sub>3</sub> <sup>+2</sup>                                 | 418.2045               | y <sub>3</sub>                                                | 645.3020 <sup>+2</sup> | y <sub>11</sub> -H <sub>3</sub> PO <sub>4</sub> <sup>+2</sup> | 815.4132 <sup>+2</sup> | MH-H <sub>3</sub> PO <sub>4</sub> <sup>+2</sup>               | 1360.6339 | y <sub>12</sub> -H <sub>3</sub> PO <sub>4</sub> |
| 254.6176 <sup>+2</sup> | b <sub>4</sub> <sup>+2</sup>                                 | 459.2380 <sup>+2</sup> | y <sub>7</sub> <sup>+2</sup>                                  | 655.8030 <sup>+2</sup> | b <sub>11</sub> <sup>+2</sup>                                 | 826.4417               | b <sub>8</sub> -H <sub>3</sub> PO <sub>4</sub>                | 1387.5737 | y <sub>11</sub>                                 |
| 256.1530 <sup>+2</sup> | b <sub>5</sub> -H <sub>3</sub> PO <sub>4</sub> <sup>+2</sup> | 462.7130 <sup>+2</sup> | b <sub>8</sub> <sup>+2</sup>                                  | 671.3359 <sup>+2</sup> | b <sub>12</sub> -H <sub>3</sub> PO <sub>4</sub> <sup>+2</sup> | 864.4016 <sup>+2</sup> | MH <sup>+2</sup>                                              | 1439.6414 | b <sub>12</sub>                                 |
| 270.1925               | b <sub>2</sub>                                               | 478.2458 <sup>+2</sup> | b <sub>9</sub> -H <sub>3</sub> PO <sub>4</sub> <sup>+2</sup>  | 675.342                | y <sub>5</sub>                                                | 917.4687               | y <sub>7</sub>                                                | 1455.7074 | b <sub>13</sub> -H <sub>3</sub> PO <sub>4</sub> |
| 273.6534 <sup>+2</sup> | y <sub>4</sub> <sup>+2</sup>                                 | 508.2279               | b <sub>4</sub>                                                | 680.8206 <sup>+2</sup> | y <sub>12</sub> -H <sub>3</sub> PO <sub>4</sub> <sup>+2</sup> | 924.4186               | b <sub>8</sub>                                                | 1458.6108 | y <sub>12</sub>                                 |
| 289.1619               | y <sub>2</sub>                                               | 511.2987               | b <sub>5</sub> -H <sub>3</sub> PO <sub>4</sub>                | 694.2905 <sup>+2</sup> | y <sub>11</sub> <sup>+2</sup>                                 | 955.4843               | b <sub>9</sub> -H <sub>3</sub> PO <sub>4</sub>                | 1473.718  | y <sub>13</sub> -H <sub>3</sub> PO <sub>4</sub> |
| 299.6690 <sup>+2</sup> | b <sub>6</sub> -H <sub>3</sub> PO <sub>4</sub> <sup>+2</sup> | 516.7515 <sup>+2</sup> | y <sub>8</sub> <sup>+2</sup>                                  | 696.3076               | b <sub>6</sub>                                                | 1032.4956              | y <sub>8</sub>                                                | 1553.6843 | b <sub>13</sub>                                 |
| 305.1414 <sup>+2</sup> | b <sub>5</sub> <sup>+2</sup>                                 | 527.2343 <sup>+2</sup> | b <sub>9</sub> <sup>+2</sup>                                  | 713.3577               | b <sub>7</sub> -H <sub>3</sub> PO <sub>4</sub>                | 1053.4612              | b <sub>9</sub>                                                | 1571.6949 | y <sub>13</sub>                                 |
| 338.1747 <sup>+2</sup> | y <sub>5</sub> <sup>+2</sup>                                 | 542.7671 <sup>+2</sup> | b <sub>10</sub> -H <sub>3</sub> PO <sub>4</sub> <sup>+2</sup> | 720.3243 <sup>+2</sup> | b <sub>12</sub> <sup>+2</sup>                                 | 1084.5269              | b <sub>10</sub> -H <sub>3</sub> PO <sub>4</sub>               | 1629.8191 | MH-H <sub>3</sub> PO <sub>4</sub>               |
| 341.2296               | b <sub>3</sub>                                               | 546.2994               | y <sub>4</sub>                                                | 728.3573 <sup>+2</sup> | b <sub>13</sub> -H <sub>3</sub> PO <sub>4</sub> <sup>+2</sup> | 1119.5277              | y <sub>9</sub>                                                | 1727.796  | MH                                              |

MS/MS Fragmentation of RStQGVTLTDLQEAEK  
 Found in IPI00397730, Isoform 4 of Protein phosphatase 1 regulatory subunit 12A

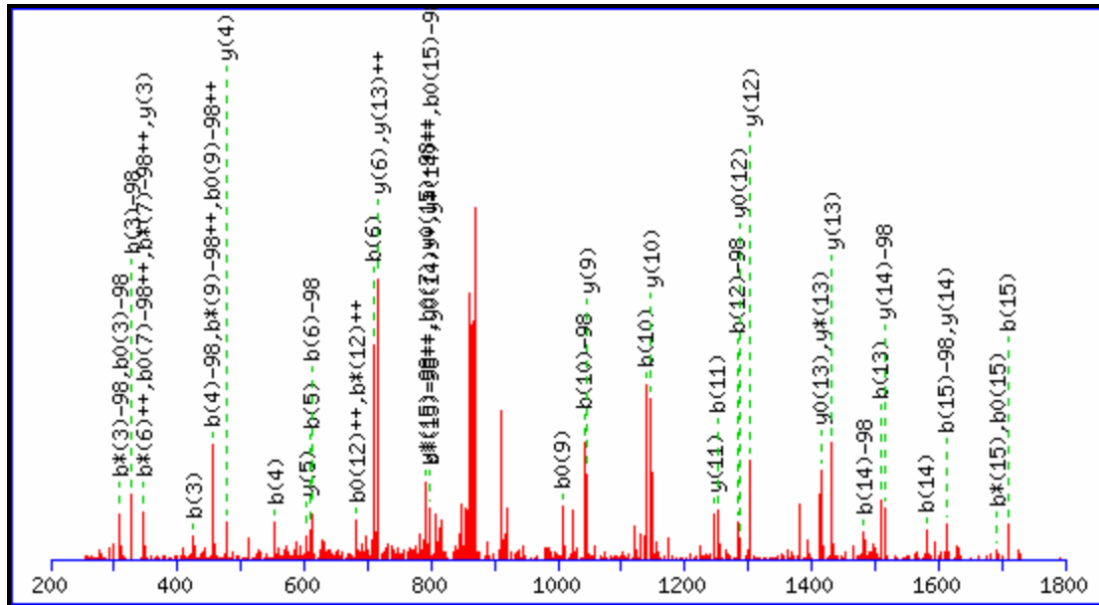

|                        |                                                              |                        |                                                               |                        |                                                               |                        |                                                 |           |                                                 |
|------------------------|--------------------------------------------------------------|------------------------|---------------------------------------------------------------|------------------------|---------------------------------------------------------------|------------------------|-------------------------------------------------|-----------|-------------------------------------------------|
| 74.0600 <sup>+2</sup>  | y <sub>1</sub> <sup>+2</sup>                                 | 356.6905 <sup>+2</sup> | b <sub>7</sub> -H <sub>3</sub> PO <sub>4</sub> <sup>+2</sup>  | 604.2937               | y <sub>5</sub>                                                | 806.8769 <sup>+2</sup> | y <sub>14</sub> <sup>+2</sup>                   | 1282.675  | b <sub>12</sub> -H <sub>3</sub> PO <sub>4</sub> |
| 122.5738 <sup>+2</sup> | b <sub>2</sub> <sup>+2</sup>                                 | 359.1925 <sup>+2</sup> | y <sub>6</sub> <sup>+2</sup>                                  | 610.2345               | b <sub>5</sub>                                                | 810.3506               | b <sub>7</sub>                                  | 1303.674  | y <sub>12</sub>                                 |
| 138.5813 <sup>+2</sup> | y <sub>2</sub> <sup>+2</sup>                                 | 405.6789 <sup>+2</sup> | b <sub>7</sub> <sup>+2</sup>                                  | 611.326                | b <sub>6</sub> -H <sub>3</sub> PO <sub>4</sub>                | 825.4577               | b <sub>8</sub> -H <sub>3</sub> PO <sub>4</sub>  | 1380.6519 | b <sub>12</sub>                                 |
| 147.1128               | y <sub>1</sub>                                               | 413.2325 <sup>+2</sup> | b <sub>8</sub> -H <sub>3</sub> PO <sub>4</sub> <sup>+2</sup>  | 623.8299 <sup>+2</sup> | y <sub>11</sub> <sup>+2</sup>                                 | 832.4047               | y <sub>7</sub>                                  | 1411.7176 | b <sub>13</sub> -H <sub>3</sub> PO <sub>4</sub> |
| 164.0924 <sup>+2</sup> | b <sub>3</sub> -H <sub>3</sub> PO <sub>4</sub> <sup>+2</sup> | 416.7060 <sup>+2</sup> | y <sub>7</sub> <sup>+2</sup>                                  | 626.8003 <sup>+2</sup> | b <sub>11</sub> <sup>+2</sup>                                 | 850.3929 <sup>+2</sup> | y <sub>15</sub> <sup>+2</sup>                   | 1431.7326 | y <sub>13</sub>                                 |
| 174.0999 <sup>+2</sup> | y <sub>3</sub> <sup>+2</sup>                                 | 425.1544               | b <sub>3</sub>                                                | 641.8411 <sup>+2</sup> | b <sub>12</sub> -H <sub>3</sub> PO <sub>4</sub> <sup>+2</sup> | 855.3907 <sup>+2</sup> | b <sub>15</sub> <sup>+2</sup>                   | 1482.7547 | b <sub>14</sub> -H <sub>3</sub> PO <sub>4</sub> |
| 213.0809 <sup>+2</sup> | b <sub>3</sub> <sup>+2</sup>                                 | 455.2361               | b <sub>4</sub> -H <sub>3</sub> PO <sub>4</sub>                | 652.3406 <sup>+2</sup> | y <sub>12</sub> <sup>+2</sup>                                 | 879.4550 <sup>+2</sup> | MH-H <sub>3</sub> PO <sub>4</sub> <sup>+2</sup> | 1509.6945 | b <sub>13</sub>                                 |
| 228.1217 <sup>+2</sup> | b <sub>4</sub> -H <sub>3</sub> PO <sub>4</sub> <sup>+2</sup> | 462.2209 <sup>+2</sup> | b <sub>8</sub> <sup>+2</sup>                                  | 690.8296 <sup>+2</sup> | b <sub>12</sub> <sup>+2</sup>                                 | 923.4346               | b <sub>8</sub>                                  | 1514.7697 | y <sub>14</sub> -H <sub>3</sub> PO <sub>4</sub> |
| 238.6212 <sup>+2</sup> | y <sub>4</sub> <sup>+2</sup>                                 | 463.7563 <sup>+2</sup> | b <sub>9</sub> -H <sub>3</sub> PO <sub>4</sub> <sup>+2</sup>  | 706.3624 <sup>+2</sup> | b <sub>13</sub> -H <sub>3</sub> PO <sub>4</sub> <sup>+2</sup> | 926.5054               | b <sub>9</sub> -H <sub>3</sub> PO <sub>4</sub>  | 1580.7316 | b <sub>14</sub>                                 |
| 244.1404               | b <sub>2</sub>                                               | 467.2298 <sup>+2</sup> | y <sub>8</sub> <sup>+2</sup>                                  | 709.3029               | b <sub>6</sub>                                                | 928.4435 <sup>+2</sup> | MH <sup>+2</sup>                                | 1601.8017 | y <sub>15</sub> -H <sub>3</sub> PO <sub>4</sub> |
| 256.6324 <sup>+2</sup> | b <sub>5</sub> -H <sub>3</sub> PO <sub>4</sub> <sup>+2</sup> | 476.2351               | y <sub>4</sub>                                                | 712.3737               | b <sub>7</sub> -H <sub>3</sub> PO <sub>4</sub>                | 933.4524               | y <sub>8</sub>                                  | 1611.7973 | b <sub>15</sub> -H <sub>3</sub> PO <sub>4</sub> |
| 276.1554               | y <sub>2</sub>                                               | 512.2576               | b <sub>5</sub> -H <sub>3</sub> PO <sub>4</sub>                | 716.3699 <sup>+2</sup> | y <sub>13</sub> <sup>+2</sup>                                 | 1024.4823              | b <sub>9</sub>                                  | 1612.7466 | y <sub>14</sub>                                 |
| 277.1101 <sup>+2</sup> | b <sub>4</sub> <sup>+2</sup>                                 | 512.7448 <sup>+2</sup> | b <sub>9</sub> <sup>+2</sup>                                  | 717.3777               | y <sub>6</sub>                                                | 1041.5323              | b <sub>10</sub> -H <sub>3</sub> PO <sub>4</sub> | 1699.7786 | y <sub>15</sub>                                 |
| 302.6505 <sup>+2</sup> | y <sub>5</sub> <sup>+2</sup>                                 | 521.2698 <sup>+2</sup> | b <sub>10</sub> -H <sub>3</sub> PO <sub>4</sub> <sup>+2</sup> | 741.8810 <sup>+2</sup> | b <sub>14</sub> -H <sub>3</sub> PO <sub>4</sub> <sup>+2</sup> | 1046.5364              | y <sub>9</sub>                                  | 1709.7742 | b <sub>15</sub>                                 |
| 305.6209 <sup>+2</sup> | b <sub>2</sub> <sup>+2</sup>                                 | 523.7719 <sup>+2</sup> | y <sub>9</sub> <sup>+2</sup>                                  | 755.3509 <sup>+2</sup> | b <sub>13</sub> <sup>+2</sup>                                 | 1139.5092              | b <sub>10</sub>                                 | 1757.9028 | MH-H <sub>3</sub> PO <sub>4</sub>               |
| 306.1666 <sup>+2</sup> | b <sub>6</sub> -H <sub>3</sub> PO <sub>4</sub> <sup>+2</sup> | 553.213                | b <sub>4</sub>                                                | 757.8885 <sup>+2</sup> | y <sub>14</sub> -H <sub>3</sub> PO <sub>4</sub> <sup>+2</sup> | 1147.5841              | y <sub>10</sub>                                 | 1855.8797 | MH                                              |
| 327.1775               | b <sub>3</sub> -H <sub>3</sub> PO <sub>4</sub>               | 570.2583 <sup>+2</sup> | b <sub>10</sub> <sup>+2</sup>                                 | 790.8694 <sup>+2</sup> | b <sub>14</sub> <sup>+2</sup>                                 | 1154.6164              | b <sub>11</sub> -H <sub>3</sub> PO <sub>4</sub> |           |                                                 |
| 347.1925               | y <sub>3</sub>                                               | 574.2957 <sup>+2</sup> | y <sub>10</sub> <sup>+2</sup>                                 | 801.4045 <sup>+2</sup> | y <sub>15</sub> -H <sub>3</sub> PO <sub>4</sub> <sup>+2</sup> | 1246.6525              | y <sub>11</sub>                                 |           |                                                 |
| 355.1551 <sup>+2</sup> | b <sub>6</sub> <sup>+2</sup>                                 | 577.8118 <sup>+2</sup> | b <sub>11</sub> -H <sub>3</sub> PO <sub>4</sub> <sup>+2</sup> | 806.4023 <sup>+2</sup> | b <sub>15</sub> -H <sub>3</sub> PO <sub>4</sub> <sup>+2</sup> | 1252.5933              | b <sub>11</sub>                                 |           |                                                 |

MS/MS Fragmentation of GLsASTMDLSSSS  
 Found in IPI00743879, kinesin-like 8 isoform b

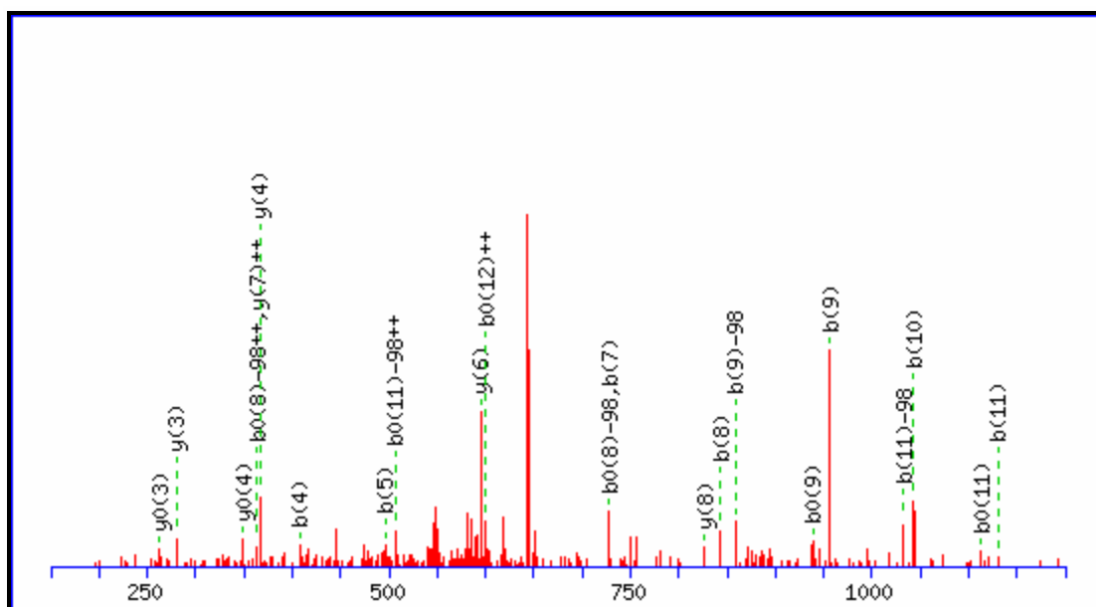

|          |                                                |          |                                                |          |                                                 |           |                                                 |           |                                                 |
|----------|------------------------------------------------|----------|------------------------------------------------|----------|-------------------------------------------------|-----------|-------------------------------------------------|-----------|-------------------------------------------------|
| 106.0499 | y <sub>1</sub>                                 | 398.2034 | b <sub>5</sub> -H <sub>3</sub> PO <sub>4</sub> | 726.2974 | y <sub>7</sub>                                  | 956.3795  | b <sub>9</sub>                                  | 1167.5198 | y <sub>12</sub> -H <sub>3</sub> PO <sub>4</sub> |
| 171.1128 | b <sub>2</sub>                                 | 409.1483 | b <sub>4</sub>                                 | 728.2685 | b <sub>7</sub>                                  | 985.4143  | y <sub>10</sub>                                 | 1217.4756 | b <sub>12</sub>                                 |
| 193.0819 | y <sub>2</sub>                                 | 480.23   | y <sub>5</sub>                                 | 745.3185 | b <sub>8</sub> -H <sub>3</sub> PO <sub>4</sub>  | 1032.4666 | b <sub>11</sub> -H <sub>3</sub> PO <sub>4</sub> | 1224.5413 | MH-H <sub>3</sub> PO <sub>4</sub>               |
| 240.1343 | b <sub>3</sub> -H <sub>3</sub> PO <sub>4</sub> | 496.1803 | b <sub>5</sub>                                 | 827.3451 | y <sub>8</sub>                                  | 1043.4115 | b <sub>10</sub>                                 | 1265.4967 | y <sub>12</sub>                                 |
| 280.1139 | y <sub>3</sub>                                 | 499.2511 | b <sub>6</sub> -H <sub>3</sub> PO <sub>4</sub> | 843.2954 | b <sub>8</sub>                                  | 1054.4357 | y <sub>11</sub> -H <sub>3</sub> PO <sub>4</sub> | 1322.5182 | MH                                              |
| 311.1714 | b <sub>4</sub> -H <sub>3</sub> PO <sub>4</sub> | 595.257  | y <sub>6</sub>                                 | 858.4026 | b <sub>9</sub> -H <sub>3</sub> PO <sub>4</sub>  | 1119.4987 | b <sub>12</sub> -H <sub>3</sub> PO <sub>4</sub> |           |                                                 |
| 338.1112 | b <sub>3</sub>                                 | 597.228  | b <sub>6</sub>                                 | 914.3772 | y <sub>9</sub>                                  | 1130.4435 | b <sub>11</sub>                                 |           |                                                 |
| 367.146  | y <sub>4</sub>                                 | 630.2916 | b <sub>7</sub> -H <sub>3</sub> PO <sub>4</sub> | 945.4346 | b <sub>10</sub> -H <sub>3</sub> PO <sub>4</sub> | 1152.4126 | y <sub>11</sub>                                 |           |                                                 |

MS/MS Fragmentation of AAsLNLYLNQPSAAPLQVSR  
 Found in IPI00743879, kinesin-like 8 isoform b

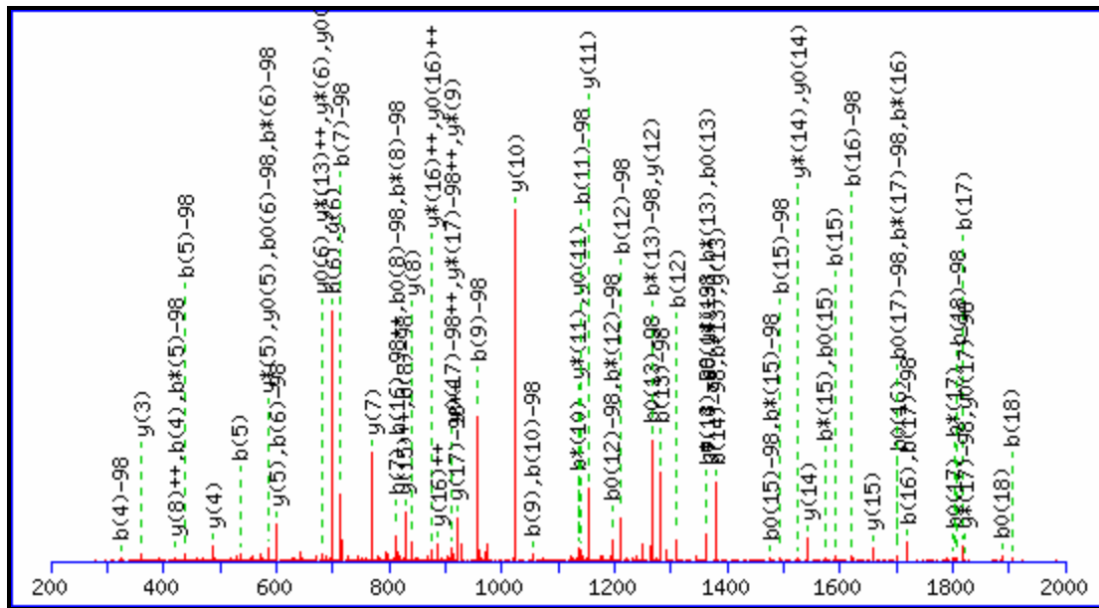

|                        |                                                |                        |                                                |                         |                                                               |           |                                                 |           |                                                 |
|------------------------|------------------------------------------------|------------------------|------------------------------------------------|-------------------------|---------------------------------------------------------------|-----------|-------------------------------------------------|-----------|-------------------------------------------------|
| 88.0631 <sup>+2</sup>  | y <sub>1</sub> <sup>+2</sup>                   | 439.23                 | b <sub>5</sub> -H <sub>3</sub> PO <sub>4</sub> | 829.4203                | b <sub>8</sub> -H <sub>3</sub> PO <sub>4</sub>                | 1141.5636 | b <sub>11</sub> -H <sub>3</sub> PO <sub>4</sub> | 1657.8656 | y <sub>15</sub>                                 |
| 131.5791 <sup>+2</sup> | y <sub>2</sub> <sup>+2</sup>                   | 464.7642 <sup>+2</sup> | y <sub>9</sub> <sup>+2</sup>                   | 829.4365 <sup>+2</sup>  | y <sub>15</sub> <sup>+2</sup>                                 | 1152.5085 | b <sub>10</sub>                                 | 1719.8102 | b <sub>16</sub>                                 |
| 143.0815               | b <sub>2</sub>                                 | 489.278                | y <sub>4</sub>                                 | 841.489                 | y <sub>8</sub>                                                | 1153.6324 | y <sub>11</sub>                                 | 1720.9017 | b <sub>17</sub> -H <sub>3</sub> PO <sub>4</sub> |
| 175.119                | y <sub>1</sub>                                 | 513.2905 <sup>+2</sup> | y <sub>10</sub> <sup>+2</sup>                  | 885.9785 <sup>+2</sup>  | y <sub>16</sub> <sup>+2</sup>                                 | 1212.6008 | b <sub>12</sub> -H <sub>3</sub> PO <sub>4</sub> | 1770.9497 | y <sub>16</sub>                                 |
| 181.1133 <sup>+2</sup> | y <sub>3</sub> <sup>+2</sup>                   | 537.2069               | b <sub>5</sub>                                 | 920.4892 <sup>+2</sup>  | y <sub>17</sub> -H <sub>3</sub> PO <sub>4</sub> <sup>+2</sup> | 1239.5405 | b <sub>11</sub>                                 | 1807.9337 | b <sub>18</sub> -H <sub>3</sub> PO <sub>4</sub> |
| 212.103                | b <sub>3</sub> -H <sub>3</sub> PO <sub>4</sub> | 577.3198 <sup>+2</sup> | y <sub>11</sub> <sup>+2</sup>                  | 927.3972                | b <sub>8</sub>                                                | 1267.6753 | y <sub>12</sub>                                 | 1818.8786 | b <sub>17</sub>                                 |
| 245.1426 <sup>+2</sup> | y <sub>4</sub> <sup>+2</sup>                   | 602.2933               | b <sub>6</sub> -H <sub>3</sub> PO <sub>4</sub> | 928.5211                | y <sub>9</sub>                                                | 1283.6379 | b <sub>13</sub> -H <sub>3</sub> PO <sub>4</sub> | 1839.9712 | y <sub>17</sub> -H <sub>3</sub> PO <sub>4</sub> |
| 262.151                | y <sub>2</sub>                                 | 602.362                | y <sub>5</sub>                                 | 956.0078 <sup>+2</sup>  | y <sub>18</sub> -H <sub>3</sub> PO <sub>4</sub> <sup>+2</sup> | 1310.5777 | b <sub>12</sub>                                 | 1905.9106 | b <sub>18</sub>                                 |
| 301.6847 <sup>+2</sup> | y <sub>5</sub> <sup>+2</sup>                   | 634.3413 <sup>+2</sup> | y <sub>12</sub> <sup>+2</sup>                  | 957.4789                | b <sub>9</sub> -H <sub>3</sub> PO <sub>4</sub>                | 1380.6906 | b <sub>14</sub> -H <sub>3</sub> PO <sub>4</sub> | 1911.0083 | y <sub>18</sub> -H <sub>3</sub> PO <sub>4</sub> |
| 310.0799               | b <sub>3</sub>                                 | 690.8833 <sup>+2</sup> | y <sub>13</sub> <sup>+2</sup>                  | 969.4777 <sup>+2</sup>  | y <sub>17</sub> <sup>+2</sup>                                 | 1380.7594 | y <sub>13</sub>                                 | 1937.9481 | y <sub>17</sub>                                 |
| 325.187                | b <sub>4</sub> -H <sub>3</sub> PO <sub>4</sub> | 699.4148               | y <sub>6</sub>                                 | 991.5263 <sup>+2</sup>  | MH-H <sub>3</sub> PO <sub>4</sub> <sup>+2</sup>               | 1381.6148 | b <sub>13</sub>                                 | 1982.0454 | MH-H <sub>3</sub> PO <sub>4</sub>               |
| 350.2110 <sup>+2</sup> | y <sub>6</sub> <sup>+2</sup>                   | 700.2702               | b <sub>6</sub>                                 | 1004.9962 <sup>+2</sup> | y <sub>18</sub> <sup>+2</sup>                                 | 1478.6675 | b <sub>14</sub>                                 | 2008.9852 | y <sub>18</sub>                                 |
| 361.2194               | y <sub>3</sub>                                 | 715.3774               | b <sub>7</sub> -H <sub>3</sub> PO <sub>4</sub> | 1025.5738               | y <sub>10</sub>                                               | 1493.7747 | b <sub>15</sub> -H <sub>3</sub> PO <sub>4</sub> | 2080.0223 | MH                                              |
| 385.7296 <sup>+2</sup> | y <sub>7</sub> <sup>+2</sup>                   | 770.4519               | y <sub>7</sub>                                 | 1040.5148 <sup>+2</sup> | MH <sup>+2</sup>                                              | 1543.8227 | y <sub>14</sub>                                 |           |                                                 |
| 421.2482 <sup>+2</sup> | y <sub>8</sub> <sup>+2</sup>                   | 772.4150 <sup>+2</sup> | y <sub>14</sub> <sup>+2</sup>                  | 1054.5316               | b <sub>10</sub> -H <sub>3</sub> PO <sub>4</sub>               | 1591.7516 | b <sub>15</sub>                                 |           |                                                 |
| 423.1639               | b <sub>4</sub>                                 | 813.3542               | b <sub>7</sub>                                 | 1055.4558               | b <sub>9</sub>                                                | 1621.8333 | b <sub>16</sub> -H <sub>3</sub> PO <sub>4</sub> |           |                                                 |

MS/MS Fragmentation of RAAsLNYLNQPSAAPLQVSR  
 Found in IPI00743879, kinesin-like 8 isoform b

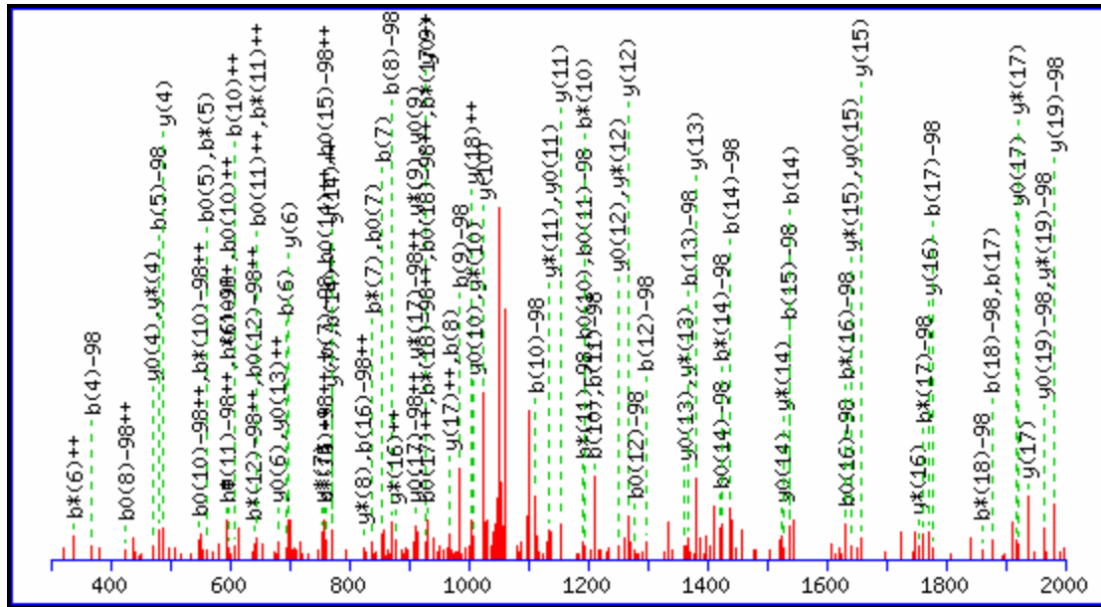

|                        |                                                              |                        |                                                               |                        |                                                               |                         |                                                               |           |                                                 |
|------------------------|--------------------------------------------------------------|------------------------|---------------------------------------------------------------|------------------------|---------------------------------------------------------------|-------------------------|---------------------------------------------------------------|-----------|-------------------------------------------------|
| 88.0631 <sup>+2</sup>  | y <sub>1</sub> <sup>+2</sup>                                 | 436.2429 <sup>+2</sup> | b <sub>8</sub> -H <sub>3</sub> PO <sub>4</sub> <sup>+2</sup>  | 720.3731 <sup>+2</sup> | b <sub>14</sub> -H <sub>3</sub> PO <sub>4</sub> <sup>+2</sup> | 985.5214                | b <sub>9</sub> -H <sub>3</sub> PO <sub>4</sub>                | 1543.8227 | y <sub>14</sub>                                 |
| 114.5764 <sup>+2</sup> | b <sub>2</sub> <sup>+2</sup>                                 | 464.7642 <sup>+2</sup> | y <sub>9</sub> <sup>+2</sup>                                  | 733.8430 <sup>+2</sup> | b <sub>13</sub> <sup>+2</sup>                                 | 987.9935 <sup>+2</sup>  | b <sub>18</sub> <sup>+2</sup>                                 | 1634.7686 | b <sub>15</sub>                                 |
| 131.5791 <sup>+2</sup> | y <sub>2</sub> <sup>+2</sup>                                 | 466.181                | b <sub>4</sub>                                                | 758.3944               | b <sub>7</sub> -H <sub>3</sub> PO <sub>4</sub>                | 991.5263 <sup>+2</sup>  | y <sub>19</sub> -H <sub>3</sub> PO <sub>4</sub> <sup>+2</sup> | 1649.8758 | b <sub>16</sub> -H <sub>3</sub> PO <sub>4</sub> |
| 150.0949 <sup>+2</sup> | b <sub>3</sub> <sup>+2</sup>                                 | 481.2881               | b <sub>5</sub> -H <sub>3</sub> PO <sub>4</sub>                | 768.8995 <sup>+2</sup> | b <sub>15</sub> -H <sub>3</sub> PO <sub>4</sub> <sup>+2</sup> | 1004.9962 <sup>+2</sup> | y <sub>18</sub> <sup>+2</sup>                                 | 1657.8656 | y <sub>15</sub>                                 |
| 175.119                | y <sub>1</sub>                                               | 485.2313 <sup>+2</sup> | b <sub>8</sub> <sup>+2</sup>                                  | 769.3616 <sup>+2</sup> | b <sub>14</sub> <sup>+2</sup>                                 | 1025.5738               | y <sub>10</sub>                                               | 1747.8527 | b <sub>16</sub>                                 |
| 181.1133 <sup>+2</sup> | y <sub>3</sub> <sup>+2</sup>                                 | 489.278                | y <sub>4</sub>                                                | 770.4519               | y <sub>7</sub>                                                | 1031.5095 <sup>+2</sup> | b <sub>19</sub> <sup>+2</sup>                                 | 1770.9497 | y <sub>16</sub>                                 |
| 184.6057 <sup>+2</sup> | b <sub>4</sub> -H <sub>3</sub> PO <sub>4</sub> <sup>+2</sup> | 493.2643 <sup>+2</sup> | b <sub>9</sub> -H <sub>3</sub> PO <sub>4</sub> <sup>+2</sup>  | 772.4150 <sup>+2</sup> | y <sub>14</sub> <sup>+2</sup>                                 | 1040.5148 <sup>+2</sup> | y <sub>19</sub> <sup>+2</sup>                                 | 1777.9344 | b <sub>17</sub> -H <sub>3</sub> PO <sub>4</sub> |
| 228.1455               | b <sub>2</sub>                                               | 513.2905 <sup>+2</sup> | y <sub>10</sub> <sup>+2</sup>                                 | 817.8880 <sup>+2</sup> | b <sub>15</sub> <sup>+2</sup>                                 | 1069.5769 <sup>+2</sup> | MH-H <sub>3</sub> PO <sub>4</sub> <sup>+2</sup>               | 1839.9712 | y <sub>17</sub> -H <sub>3</sub> PO <sub>4</sub> |
| 233.5941 <sup>+2</sup> | b <sub>4</sub> <sup>+2</sup>                                 | 542.2528 <sup>+2</sup> | b <sub>9</sub> <sup>+2</sup>                                  | 825.4415 <sup>+2</sup> | b <sub>16</sub> -H <sub>3</sub> PO <sub>4</sub> <sup>+2</sup> | 1083.4983               | b <sub>9</sub>                                                | 1875.9113 | b <sub>17</sub>                                 |
| 241.1477 <sup>+2</sup> | b <sub>5</sub> -H <sub>3</sub> PO <sub>4</sub> <sup>+2</sup> | 557.2936 <sup>+2</sup> | b <sub>10</sub> -H <sub>3</sub> PO <sub>4</sub> <sup>+2</sup> | 829.4365 <sup>+2</sup> | y <sub>15</sub> <sup>+2</sup>                                 | 1113.58                 | b <sub>10</sub> -H <sub>3</sub> PO <sub>4</sub>               | 1877.0028 | b <sub>18</sub> -H <sub>3</sub> PO <sub>4</sub> |
| 245.1426 <sup>+2</sup> | y <sub>4</sub> <sup>+2</sup>                                 | 577.3198 <sup>+2</sup> | y <sub>11</sub> <sup>+2</sup>                                 | 841.489                | y <sub>8</sub>                                                | 1118.5653 <sup>+2</sup> | MH <sup>+2</sup>                                              | 1911.0083 | y <sub>18</sub> -H <sub>3</sub> PO <sub>4</sub> |
| 262.151                | y <sub>2</sub>                                               | 579.265                | b <sub>5</sub>                                                | 856.3713               | b <sub>7</sub>                                                | 1153.6324               | y <sub>11</sub>                                               | 1937.9481 | y <sub>17</sub>                                 |
| 290.1362 <sup>+2</sup> | b <sub>5</sub> <sup>+2</sup>                                 | 595.3311               | b <sub>6</sub> -H <sub>3</sub> PO <sub>4</sub>                | 871.4785               | b <sub>8</sub> -H <sub>3</sub> PO <sub>4</sub>                | 1210.6327               | b <sub>11</sub> -H <sub>3</sub> PO <sub>4</sub>               | 1964.0348 | b <sub>19</sub> -H <sub>3</sub> PO <sub>4</sub> |
| 298.1692 <sup>+2</sup> | b <sub>6</sub> -H <sub>3</sub> PO <sub>4</sub> <sup>+2</sup> | 602.362                | y <sub>5</sub>                                                | 874.4300 <sup>+2</sup> | b <sub>16</sub> <sup>+2</sup>                                 | 1211.5569               | b <sub>10</sub>                                               | 1974.9797 | b <sub>18</sub>                                 |
| 299.1826               | b <sub>3</sub>                                               | 605.8200 <sup>+2</sup> | b <sub>11</sub> -H <sub>3</sub> PO <sub>4</sub> <sup>+2</sup> | 885.9785 <sup>+2</sup> | y <sub>16</sub> <sup>+2</sup>                                 | 1267.6753               | y <sub>12</sub>                                               | 1982.0454 | y <sub>19</sub> -H <sub>3</sub> PO <sub>4</sub> |
| 301.6847 <sup>+2</sup> | y <sub>5</sub> <sup>+2</sup>                                 | 606.2821 <sup>+2</sup> | b <sub>10</sub> <sup>+2</sup>                                 | 889.4708 <sup>+2</sup> | b <sub>17</sub> -H <sub>3</sub> PO <sub>4</sub> <sup>+2</sup> | 1297.6648               | b <sub>12</sub> -H <sub>3</sub> PO <sub>4</sub>               | 2008.9852 | y <sub>18</sub>                                 |
| 347.1576 <sup>+2</sup> | b <sub>6</sub> <sup>+2</sup>                                 | 634.3413 <sup>+2</sup> | y <sub>12</sub> <sup>+2</sup>                                 | 920.4892 <sup>+2</sup> | y <sub>17</sub> -H <sub>3</sub> PO <sub>4</sub> <sup>+2</sup> | 1308.6096               | b <sub>11</sub>                                               | 2062.0117 | b <sub>19</sub>                                 |
| 350.2110 <sup>+2</sup> | y <sub>6</sub> <sup>+2</sup>                                 | 649.3360 <sup>+2</sup> | b <sub>12</sub> -H <sub>3</sub> PO <sub>4</sub> <sup>+2</sup> | 928.5211               | y <sub>9</sub>                                                | 1368.7019               | b <sub>13</sub> -H <sub>3</sub> PO <sub>4</sub>               | 2080.0223 | y <sub>19</sub>                                 |
| 361.2194               | y <sub>3</sub>                                               | 654.8085 <sup>+2</sup> | b <sub>11</sub> <sup>+2</sup>                                 | 938.4593 <sup>+2</sup> | b <sub>17</sub> <sup>+2</sup>                                 | 1380.7594               | y <sub>13</sub>                                               | 2138.1465 | MH-H <sub>3</sub> PO <sub>4</sub>               |
| 368.2041               | b <sub>4</sub> -H <sub>3</sub> PO <sub>4</sub>               | 684.8546 <sup>+2</sup> | b <sub>13</sub> -H <sub>3</sub> PO <sub>4</sub> <sup>+2</sup> | 939.0050 <sup>+2</sup> | b <sub>18</sub> -H <sub>3</sub> PO <sub>4</sub> <sup>+2</sup> | 1395.6417               | b <sub>12</sub>                                               | 2236.1234 | MH                                              |
| 379.7008 <sup>+2</sup> | b <sub>7</sub> -H <sub>3</sub> PO <sub>4</sub> <sup>+2</sup> | 690.8833 <sup>+2</sup> | y <sub>13</sub> <sup>+2</sup>                                 | 956.0078 <sup>+2</sup> | y <sub>18</sub> -H <sub>3</sub> PO <sub>4</sub> <sup>+2</sup> | 1439.739                | b <sub>14</sub> -H <sub>3</sub> PO <sub>4</sub>               |           |                                                 |
| 385.7296 <sup>+2</sup> | y <sub>7</sub> <sup>+2</sup>                                 | 693.308                | b <sub>6</sub>                                                | 969.4554               | b <sub>8</sub>                                                | 1466.6788               | b <sub>13</sub>                                               |           |                                                 |
| 421.2482 <sup>+2</sup> | y <sub>8</sub> <sup>+2</sup>                                 | 698.3245 <sup>+2</sup> | b <sub>12</sub> <sup>+2</sup>                                 | 969.4777 <sup>+2</sup> | y <sub>17</sub> <sup>+2</sup>                                 | 1536.7918               | b <sub>15</sub> -H <sub>3</sub> PO <sub>4</sub>               |           |                                                 |
| 428.6893 <sup>+2</sup> | b <sub>7</sub> <sup>+2</sup>                                 | 699.4148               | y <sub>6</sub>                                                | 982.5211 <sup>+2</sup> | b <sub>19</sub> -H <sub>3</sub> PO <sub>4</sub> <sup>+2</sup> | 1537.7159               | b <sub>14</sub>                                               |           |                                                 |

MS/MS Fragmentation of QPAQSQNLsPLSGFSR  
 Found in IPI00515042, cingulin

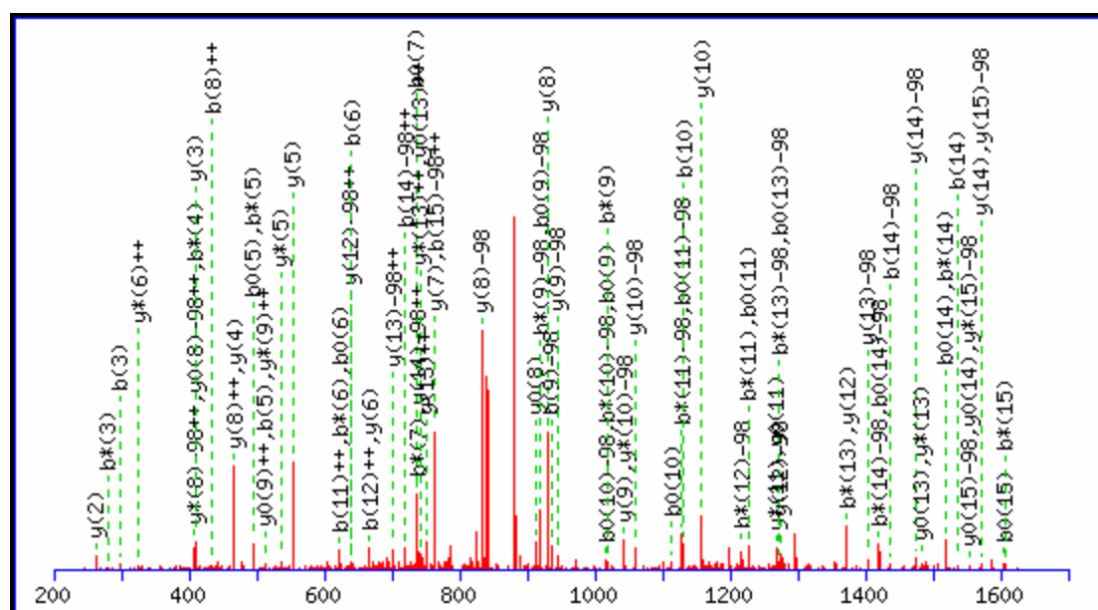

|                        |                                                              |                        |                                                               |                        |                                                               |           |                                                 |           |                                                 |
|------------------------|--------------------------------------------------------------|------------------------|---------------------------------------------------------------|------------------------|---------------------------------------------------------------|-----------|-------------------------------------------------|-----------|-------------------------------------------------|
| 88.0631 <sup>+2</sup>  | y <sub>1</sub> <sup>+2</sup>                                 | 466.2409               | y <sub>4</sub>                                                | 750.8458 <sup>+2</sup> | y <sub>13</sub> <sup>+2</sup>                                 | 1043.4921 | y <sub>9</sub>                                  | 1437.7121 | b <sub>14</sub> -H <sub>3</sub> PO <sub>4</sub> |
| 131.5791 <sup>+2</sup> | y <sub>2</sub> <sup>+2</sup>                                 | 473.2613 <sup>+2</sup> | y <sub>9</sub> -H <sub>3</sub> PO <sub>4</sub> <sup>+2</sup>  | 754.3478               | b <sub>7</sub>                                                | 1059.5582 | y <sub>10</sub> -H <sub>3</sub> PO <sub>4</sub> | 1473.7445 | y <sub>14</sub> -H <sub>3</sub> PO <sub>4</sub> |
| 175.119                | y <sub>1</sub>                                               | 512.2463               | b <sub>5</sub>                                                | 763.4097               | y <sub>7</sub>                                                | 1131.483  | b <sub>10</sub>                                 | 1500.6842 | y <sub>13</sub>                                 |
| 205.1133 <sup>+2</sup> | y <sub>3</sub> <sup>+2</sup>                                 | 522.2497 <sup>+2</sup> | y <sub>9</sub> <sup>+2</sup>                                  | 785.9023 <sup>+2</sup> | y <sub>15</sub> -H <sub>3</sub> PO <sub>4</sub> <sup>+2</sup> | 1146.5902 | b <sub>11</sub> -H <sub>3</sub> PO <sub>4</sub> | 1524.7441 | b <sub>15</sub> -H <sub>3</sub> PO <sub>4</sub> |
| 226.1186               | b <sub>2</sub>                                               | 530.2827 <sup>+2</sup> | y <sub>10</sub> -H <sub>3</sub> PO <sub>4</sub> <sup>+2</sup> | 786.3643 <sup>+2</sup> | y <sub>14</sub> <sup>+2</sup>                                 | 1157.5351 | y <sub>10</sub>                                 | 1535.689  | b <sub>14</sub>                                 |
| 233.6241 <sup>+2</sup> | y <sub>4</sub> <sup>+2</sup>                                 | 553.2729               | y <sub>5</sub>                                                | 832.4312               | y <sub>8</sub> -H <sub>3</sub> PO <sub>4</sub>                | 1187.6167 | y <sub>11</sub> -H <sub>3</sub> PO <sub>4</sub> | 1570.7972 | y <sub>15</sub> -H <sub>3</sub> PO <sub>4</sub> |
| 262.151                | y <sub>2</sub>                                               | 579.2712 <sup>+2</sup> | y <sub>10</sub> <sup>+2</sup>                                 | 834.8907 <sup>+2</sup> | y <sub>15</sub> <sup>+2</sup>                                 | 1233.6222 | b <sub>12</sub> -H <sub>3</sub> PO <sub>4</sub> | 1571.7214 | y <sub>14</sub>                                 |
| 277.1401 <sup>+2</sup> | y <sub>5</sub> <sup>+2</sup>                                 | 594.3120 <sup>+2</sup> | y <sub>11</sub> -H <sub>3</sub> PO <sub>4</sub> <sup>+2</sup> | 849.9315 <sup>+2</sup> | MH-H <sub>3</sub> PO <sub>4</sub> <sup>+2</sup>               | 1244.5671 | b <sub>11</sub>                                 | 1622.721  | b <sub>15</sub>                                 |
| 297.1557               | b <sub>3</sub>                                               | 637.8280 <sup>+2</sup> | y <sub>12</sub> -H <sub>3</sub> PO <sub>4</sub> <sup>+2</sup> | 867.4319               | b <sub>8</sub>                                                | 1274.6488 | y <sub>12</sub> -H <sub>3</sub> PO <sub>4</sub> | 1668.7741 | y <sub>15</sub>                                 |
| 333.6821 <sup>+2</sup> | y <sub>6</sub> <sup>+2</sup>                                 | 640.3049               | b <sub>6</sub>                                                | 898.9200 <sup>+2</sup> | MH <sup>+2</sup>                                              | 1285.5936 | y <sub>11</sub>                                 | 1698.8558 | MH-H <sub>3</sub> PO <sub>4</sub>               |
| 382.2085 <sup>+2</sup> | y <sub>7</sub> <sup>+2</sup>                                 | 643.3005 <sup>+2</sup> | y <sub>11</sub> <sup>+2</sup>                                 | 930.4081               | y <sub>8</sub>                                                | 1290.6437 | b <sub>13</sub> -H <sub>3</sub> PO <sub>4</sub> | 1796.8327 | MH                                              |
| 409.2194               | y <sub>3</sub>                                               | 666.357                | y <sub>6</sub>                                                | 936.4534               | b <sub>9</sub> -H <sub>3</sub> PO <sub>4</sub>                | 1331.5991 | b <sub>12</sub>                                 |           |                                                 |
| 416.7192 <sup>+2</sup> | y <sub>8</sub> -H <sub>3</sub> PO <sub>4</sub> <sup>+2</sup> | 686.8165 <sup>+2</sup> | y <sub>12</sub> <sup>+2</sup>                                 | 945.5152               | y <sub>9</sub> -H <sub>3</sub> PO <sub>4</sub>                | 1372.6257 | y <sub>12</sub>                                 |           |                                                 |
| 425.2143               | b <sub>4</sub>                                               | 701.8573 <sup>+2</sup> | y <sub>13</sub> -H <sub>3</sub> PO <sub>4</sub> <sup>+2</sup> | 1033.5061              | b <sub>10</sub> -H <sub>3</sub> PO <sub>4</sub>               | 1388.6206 | b <sub>13</sub>                                 |           |                                                 |
| 465.7077 <sup>+2</sup> | y <sub>8</sub> <sup>+2</sup>                                 | 737.3759 <sup>+2</sup> | y <sub>14</sub> -H <sub>3</sub> PO <sub>4</sub> <sup>+2</sup> | 1034.4303              | b <sub>9</sub>                                                | 1402.7074 | y <sub>13</sub> -H <sub>3</sub> PO <sub>4</sub> |           |                                                 |



MS/MS Fragmentation of sHSQASLAGPGPVDPNSR  
 Found in IPI00515042, cingulin

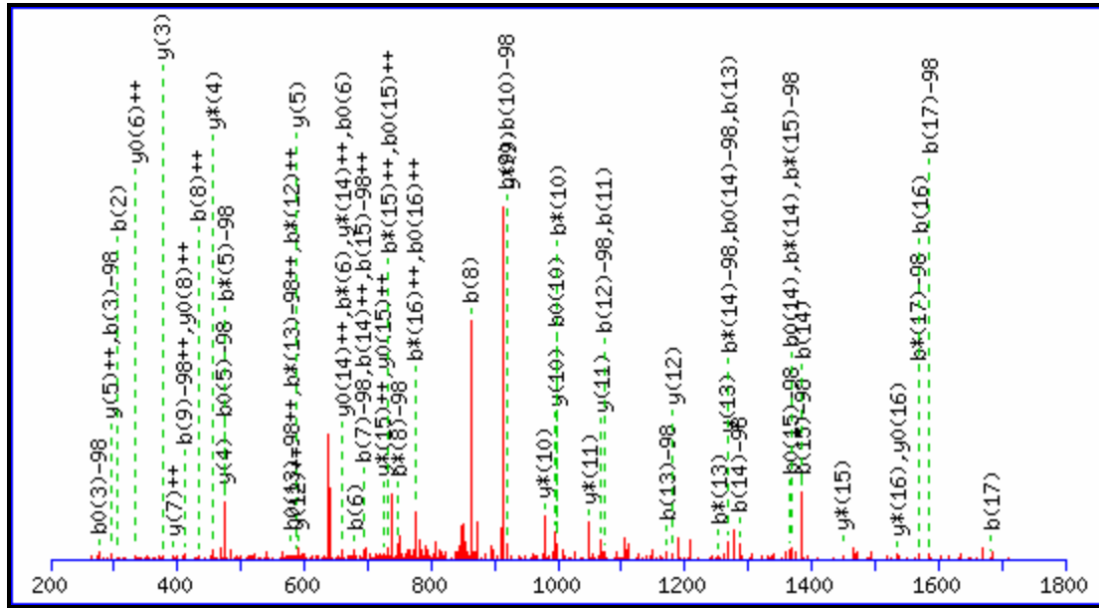

|                        |                                                              |                        |                                                               |                        |                                                               |                        |                                                               |           |                                                 |
|------------------------|--------------------------------------------------------------|------------------------|---------------------------------------------------------------|------------------------|---------------------------------------------------------------|------------------------|---------------------------------------------------------------|-----------|-------------------------------------------------|
| 88.0631 <sup>+2</sup>  | y <sub>1</sub> <sup>+2</sup>                                 | 347.1694 <sup>+2</sup> | b <sub>7</sub> -H <sub>3</sub> PO <sub>4</sub> <sup>+2</sup>  | 537.2242 <sup>+2</sup> | b <sub>11</sub> <sup>+2</sup>                                 | 784.3948               | y <sub>7</sub>                                                | 1171.5854 | b <sub>13</sub> -H <sub>3</sub> PO <sub>4</sub> |
| 104.0475 <sup>+2</sup> | b <sub>2</sub> -H <sub>3</sub> PO <sub>4</sub> <sup>+2</sup> | 376.1939               | y <sub>3</sub>                                                | 580.2474               | b <sub>6</sub> -H <sub>3</sub> PO <sub>4</sub>                | 784.8407 <sup>+2</sup> | b <sub>16</sub> <sup>+2</sup>                                 | 1179.6117 | y <sub>12</sub>                                 |
| 145.0846 <sup>+2</sup> | y <sub>2</sub> <sup>+2</sup>                                 | 382.6879 <sup>+2</sup> | b <sub>8</sub> -H <sub>3</sub> PO <sub>4</sub> <sup>+2</sup>  | 585.7506 <sup>+2</sup> | b <sub>12</sub> <sup>+2</sup>                                 | 791.3084               | b <sub>7</sub>                                                | 1266.6437 | y <sub>13</sub>                                 |
| 147.5635 <sup>+2</sup> | b <sub>3</sub> -H <sub>3</sub> PO <sub>4</sub> <sup>+2</sup> | 392.0966               | b <sub>3</sub>                                                | 586.2964 <sup>+2</sup> | b <sub>13</sub> -H <sub>3</sub> PO <sub>4</sub> <sup>+2</sup> | 792.8737 <sup>+2</sup> | b <sub>17</sub> -H <sub>3</sub> PO <sub>4</sub> <sup>+2</sup> | 1269.5623 | b <sub>13</sub>                                 |
| 153.0359 <sup>+2</sup> | b <sub>2</sub> <sup>+2</sup>                                 | 392.7010 <sup>+2</sup> | y <sub>7</sub> <sup>+2</sup>                                  | 588.2736               | y <sub>5</sub>                                                | 821.39                 | b <sub>9</sub> -H <sub>3</sub> PO <sub>4</sub>                | 1286.6124 | b <sub>14</sub> -H <sub>3</sub> PO <sub>4</sub> |
| 175.119                | y <sub>1</sub>                                               | 396.1578 <sup>+2</sup> | b <sub>7</sub> <sup>+2</sup>                                  | 590.3095 <sup>+2</sup> | y <sub>12</sub> <sup>+2</sup>                                 | 841.4163               | y <sub>8</sub>                                                | 1337.6808 | y <sub>14</sub>                                 |
| 188.6006 <sup>+2</sup> | y <sub>3</sub> <sup>+2</sup>                                 | 411.1987 <sup>+2</sup> | b <sub>9</sub> -H <sub>3</sub> PO <sub>4</sub> <sup>+2</sup>  | 591.1923               | b <sub>5</sub>                                                | 841.8621 <sup>+2</sup> | b <sub>17</sub> <sup>+2</sup>                                 | 1383.6652 | b <sub>15</sub> -H <sub>3</sub> PO <sub>4</sub> |
| 196.5519 <sup>+2</sup> | b <sub>3</sub> <sup>+2</sup>                                 | 421.2118 <sup>+2</sup> | y <sub>8</sub> <sup>+2</sup>                                  | 633.8255 <sup>+2</sup> | y <sub>13</sub> <sup>+2</sup>                                 | 845.4188 <sup>+2</sup> | y <sub>17</sub> <sup>+2</sup>                                 | 1384.5893 | b <sub>14</sub>                                 |
| 207.0877               | b <sub>2</sub> -H <sub>3</sub> PO <sub>4</sub>               | 422.1783               | b <sub>4</sub> -H <sub>3</sub> PO <sub>4</sub>                | 635.2848 <sup>+2</sup> | b <sub>13</sub> <sup>+2</sup>                                 | 862.3455               | b <sub>8</sub>                                                | 1465.7394 | y <sub>15</sub>                                 |
| 211.5928 <sup>+2</sup> | b <sub>4</sub> -H <sub>3</sub> PO <sub>4</sub> <sup>+2</sup> | 431.6764 <sup>+2</sup> | b <sub>8</sub> <sup>+2</sup>                                  | 643.8098 <sup>+2</sup> | b <sub>14</sub> -H <sub>3</sub> PO <sub>4</sub> <sup>+2</sup> | 879.9295 <sup>+2</sup> | MH-H <sub>3</sub> PO <sub>4</sub> <sup>+2</sup>               | 1470.6972 | b <sub>16</sub> -H <sub>3</sub> PO <sub>4</sub> |
| 237.1270 <sup>+2</sup> | y <sub>4</sub> <sup>+2</sup>                                 | 459.7250 <sup>+2</sup> | b <sub>10</sub> -H <sub>3</sub> PO <sub>4</sub> <sup>+2</sup> | 669.3440 <sup>+2</sup> | y <sub>14</sub> <sup>+2</sup>                                 | 918.4428               | b <sub>10</sub> -H <sub>3</sub> PO <sub>4</sub>               | 1481.642  | b <sub>15</sub>                                 |
| 247.1113 <sup>+2</sup> | b <sub>5</sub> -H <sub>3</sub> PO <sub>4</sub> <sup>+2</sup> | 460.1871 <sup>+2</sup> | b <sub>9</sub> <sup>+2</sup>                                  | 678.2243               | b <sub>6</sub>                                                | 919.3669               | b <sub>9</sub>                                                | 1552.7714 | y <sub>16</sub>                                 |
| 260.5812 <sup>+2</sup> | b <sub>4</sub> <sup>+2</sup>                                 | 469.7381 <sup>+2</sup> | y <sub>9</sub> <sup>+2</sup>                                  | 687.342                | y <sub>6</sub>                                                | 928.9180 <sup>+2</sup> | MH <sup>+2</sup>                                              | 1568.6741 | b <sub>16</sub>                                 |
| 289.1619               | y <sub>2</sub>                                               | 473.2467               | y <sub>4</sub>                                                | 692.3362 <sup>+2</sup> | b <sub>15</sub> -H <sub>3</sub> PO <sub>4</sub> <sup>+2</sup> | 938.469                | y <sub>9</sub>                                                | 1584.7401 | b <sub>17</sub> -H <sub>3</sub> PO <sub>4</sub> |
| 290.6273 <sup>+2</sup> | b <sub>6</sub> -H <sub>3</sub> PO <sub>4</sub> <sup>+2</sup> | 488.2358 <sup>+2</sup> | b <sub>11</sub> -H <sub>3</sub> PO <sub>4</sub> <sup>+2</sup> | 692.7983 <sup>+2</sup> | b <sub>14</sub> <sup>+2</sup>                                 | 975.4643               | b <sub>11</sub> -H <sub>3</sub> PO <sub>4</sub>               | 1682.717  | b <sub>17</sub>                                 |
| 294.1197               | b <sub>3</sub> -H <sub>3</sub> PO <sub>4</sub>               | 493.2154               | b <sub>5</sub> -H <sub>3</sub> PO <sub>4</sub>                | 693.3315               | b <sub>7</sub> -H <sub>3</sub> PO <sub>4</sub>                | 995.4905               | y <sub>10</sub>                                               | 1689.8303 | y <sub>17</sub>                                 |
| 294.6404 <sup>+2</sup> | y <sub>5</sub> <sup>+2</sup>                                 | 498.2489 <sup>+2</sup> | y <sub>10</sub> <sup>+2</sup>                                 | 733.3733 <sup>+2</sup> | y <sub>15</sub> <sup>+2</sup>                                 | 1016.4197              | b <sub>10</sub>                                               | 1758.8518 | MH-H <sub>3</sub> PO <sub>4</sub>               |
| 296.0998 <sup>+2</sup> | b <sub>5</sub> <sup>+2</sup>                                 | 508.7135 <sup>+2</sup> | b <sub>10</sub> <sup>+2</sup>                                 | 735.8522 <sup>+2</sup> | b <sub>16</sub> -H <sub>3</sub> PO <sub>4</sub> <sup>+2</sup> | 1066.5276              | y <sub>11</sub>                                               | 1856.8287 | MH                                              |
| 305.0645               | b <sub>2</sub>                                               | 520.1552               | b <sub>4</sub>                                                | 741.3247 <sup>+2</sup> | b <sub>15</sub> <sup>+2</sup>                                 | 1072.517               | b <sub>12</sub> -H <sub>3</sub> PO <sub>4</sub>               |           |                                                 |
| 339.6158 <sup>+2</sup> | b <sub>6</sub> <sup>+2</sup>                                 | 533.7674 <sup>+2</sup> | y <sub>11</sub> <sup>+2</sup>                                 | 764.3686               | b <sub>8</sub> -H <sub>3</sub> PO <sub>4</sub>                | 1073.4412              | b <sub>11</sub>                                               |           |                                                 |
| 344.1747 <sup>+2</sup> | y <sub>6</sub> <sup>+2</sup>                                 | 536.7622 <sup>+2</sup> | b <sub>12</sub> -H <sub>3</sub> PO <sub>4</sub> <sup>+2</sup> | 776.8893 <sup>+2</sup> | y <sub>16</sub> <sup>+2</sup>                                 | 1170.4939              | b <sub>12</sub>                                               |           |                                                 |

MS/MS Fragmentation of SNsmLELAPK  
 Found in IPI00515042, cingulin

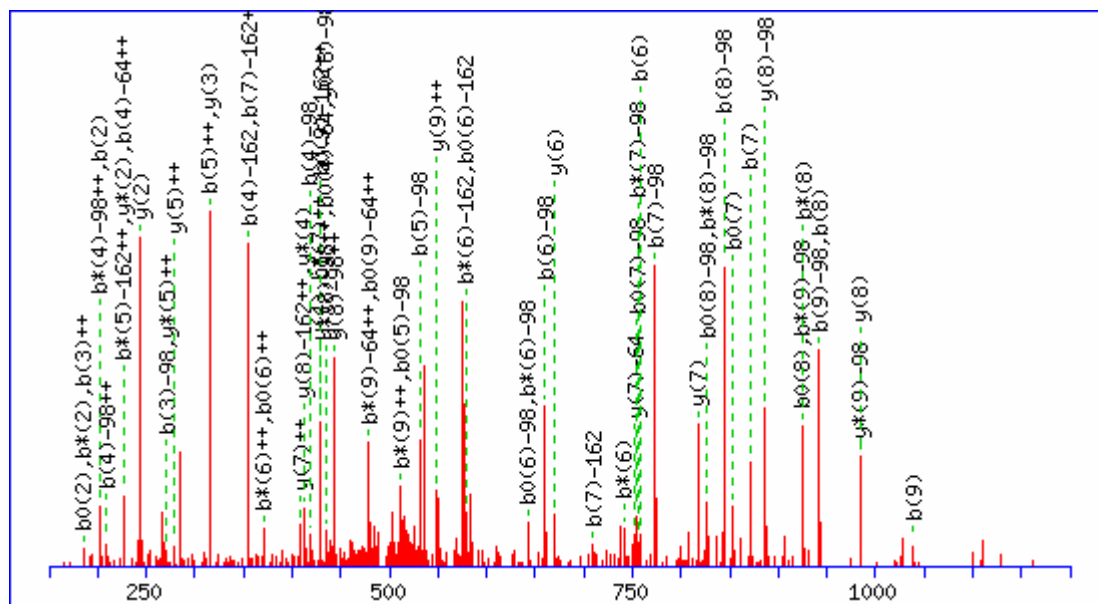

|                        |                                                |                        |                                                              |                        |                                                 |          |                                                |           |                                                |
|------------------------|------------------------------------------------|------------------------|--------------------------------------------------------------|------------------------|-------------------------------------------------|----------|------------------------------------------------|-----------|------------------------------------------------|
| 74.0600 <sup>+2</sup>  | y <sub>1</sub> <sup>+2</sup>                   | 315.2027               | y <sub>3</sub>                                               | 516.116                | b <sub>4</sub>                                  | 758.2426 | b <sub>6</sub>                                 | 1000.5132 | y <sub>9</sub> -H <sub>3</sub> PO <sub>4</sub> |
| 122.5864 <sup>+2</sup> | y <sub>2</sub> <sup>+2</sup>                   | 335.7103 <sup>+2</sup> | y <sub>6</sub> <sup>+2</sup>                                 | 531.2232               | b <sub>5</sub> -H <sub>3</sub> PO <sub>4</sub>  | 773.3498 | b <sub>7</sub> -H <sub>3</sub> PO <sub>4</sub> | 1039.4166 | b <sub>9</sub>                                 |
| 147.1128               | y <sub>1</sub>                                 | 369.0806               | b <sub>3</sub>                                               | 544.2762 <sup>+2</sup> | MH-H <sub>3</sub> PO <sub>4</sub> <sup>+2</sup> | 817.4488 | y <sub>7</sub>                                 | 1087.5452 | MH-H <sub>3</sub> PO <sub>4</sub>              |
| 158.1050 <sup>+2</sup> | y <sub>3</sub> <sup>+2</sup>                   | 409.2280 <sup>+2</sup> | y <sub>7</sub> <sup>+2</sup>                                 | 549.7487 <sup>+2</sup> | y <sub>9</sub> <sup>+2</sup>                    | 844.3869 | b <sub>8</sub> -H <sub>3</sub> PO <sub>4</sub> | 1098.4901 | y <sub>9</sub>                                 |
| 202.0822               | b <sub>2</sub>                                 | 418.1391               | b <sub>4</sub> -H <sub>3</sub> PO <sub>4</sub>               | 557.3293               | y <sub>5</sub>                                  | 871.3267 | b <sub>7</sub>                                 | 1185.5221 | MH                                             |
| 214.6470 <sup>+2</sup> | y <sub>4</sub> <sup>+2</sup>                   | 428.2867               | y <sub>4</sub>                                               | 593.2647 <sup>+2</sup> | MH <sup>+2</sup>                                | 886.4703 | y <sub>8</sub> -H <sub>3</sub> PO <sub>4</sub> |           |                                                |
| 244.1656               | y <sub>2</sub>                                 | 443.7388 <sup>+2</sup> | y <sub>8</sub> -H <sub>3</sub> PO <sub>4</sub> <sup>+2</sup> | 629.2001               | b <sub>5</sub>                                  | 941.4397 | b <sub>9</sub> -H <sub>3</sub> PO <sub>4</sub> |           |                                                |
| 271.1037               | b <sub>3</sub> -H <sub>3</sub> PO <sub>4</sub> | 492.7272 <sup>+2</sup> | y <sub>8</sub> <sup>+2</sup>                                 | 660.2658               | b <sub>6</sub> -H <sub>3</sub> PO <sub>4</sub>  | 942.3638 | b <sub>8</sub>                                 |           |                                                |
| 279.1683 <sup>+2</sup> | y <sub>5</sub> <sup>+2</sup>                   | 500.7602 <sup>+2</sup> | y <sub>9</sub> -H <sub>3</sub> PO <sub>4</sub> <sup>+2</sup> | 670.4134               | y <sub>6</sub>                                  | 984.4472 | y <sub>8</sub>                                 |           |                                                |

MS/MS Fragmentation of VAsPGSTIDTAPLSSVDSLIN  
 Found in IPI00515042, cingulin

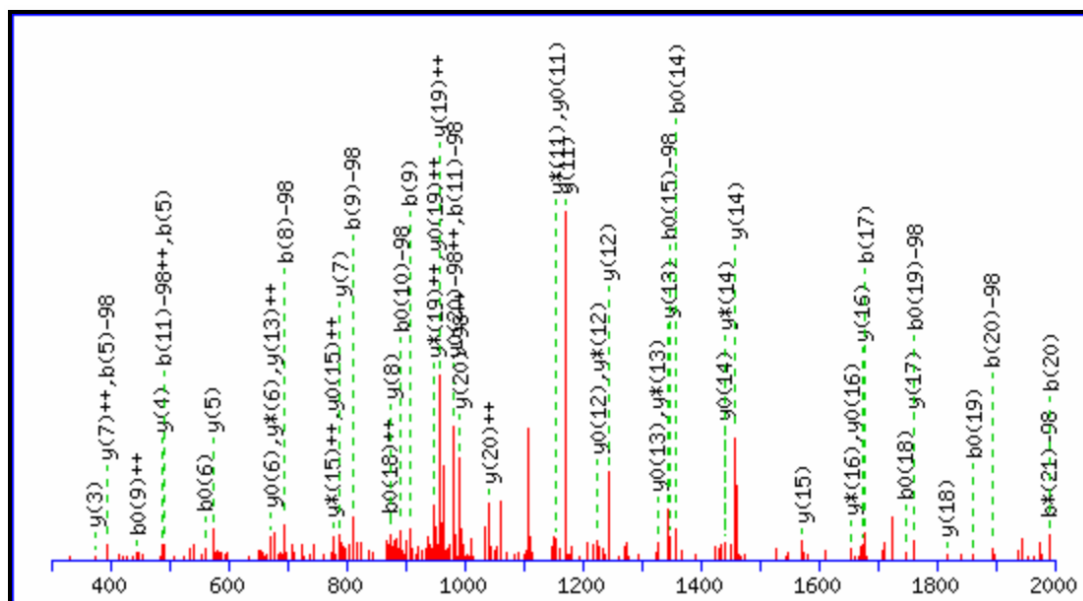

|                        |                                                |                        |                                                |                         |                                                               |                         |                                                 |           |                                                 |
|------------------------|------------------------------------------------|------------------------|------------------------------------------------|-------------------------|---------------------------------------------------------------|-------------------------|-------------------------------------------------|-----------|-------------------------------------------------|
| 74.0600 <sup>+2</sup>  | y <sub>1</sub> <sup>+2</sup>                   | 481.7613 <sup>+2</sup> | y <sub>9</sub> <sup>+2</sup>                   | 837.4514 <sup>+2</sup>  | y <sub>16</sub> <sup>+2</sup>                                 | 1126.5565 <sup>+2</sup> | MH <sup>+2</sup>                                | 1678.7571 | b <sub>17</sub>                                 |
| 131.0815 <sup>+2</sup> | y <sub>2</sub> <sup>+2</sup>                   | 487.3239               | y <sub>4</sub>                                 | 875.4833                | y <sub>8</sub>                                                | 1172.6521               | y <sub>11</sub>                                 | 1760.9276 | y <sub>17</sub>                                 |
| 147.1128               | y <sub>1</sub>                                 | 492.1854               | b <sub>5</sub>                                 | 880.9675 <sup>+2</sup>  | y <sub>17</sub> <sup>+2</sup>                                 | 1177.5137               | b <sub>12</sub>                                 | 1765.7892 | b <sub>18</sub>                                 |
| 171.1128               | b <sub>2</sub>                                 | 538.3033 <sup>+2</sup> | y <sub>10</sub> <sup>+2</sup>                  | 908.3761                | b <sub>9</sub>                                                | 1192.6208               | b <sub>13</sub> -H <sub>3</sub> PO <sub>4</sub> | 1780.8963 | b <sub>19</sub> -H <sub>3</sub> PO <sub>4</sub> |
| 187.6235 <sup>+2</sup> | y <sub>3</sub> <sup>+2</sup>                   | 574.3559               | y <sub>5</sub>                                 | 909.4782 <sup>+2</sup>  | y <sub>18</sub> <sup>+2</sup>                                 | 1243.6892               | y <sub>12</sub>                                 | 1817.9491 | y <sub>18</sub>                                 |
| 240.1343               | b <sub>3</sub> -H <sub>3</sub> PO <sub>4</sub> | 579.2174               | b <sub>6</sub>                                 | 911.4469                | b <sub>10</sub> -H <sub>3</sub> PO <sub>4</sub>               | 1279.6529               | b <sub>14</sub> -H <sub>3</sub> PO <sub>4</sub> | 1878.8732 | b <sub>19</sub>                                 |
| 244.1656 <sup>+2</sup> | y <sub>4</sub> <sup>+2</sup>                   | 582.2882               | b <sub>7</sub> -H <sub>3</sub> PO <sub>4</sub> | 958.0046 <sup>+2</sup>  | y <sub>19</sub> <sup>+2</sup>                                 | 1290.5977               | b <sub>13</sub>                                 | 1893.9804 | b <sub>20</sub> -H <sub>3</sub> PO <sub>4</sub> |
| 261.1557               | y <sub>2</sub>                                 | 586.8297 <sup>+2</sup> | y <sub>11</sub> <sup>+2</sup>                  | 962.5153                | y <sub>9</sub>                                                | 1344.7369               | y <sub>13</sub>                                 | 1915.0019 | y <sub>19</sub>                                 |
| 287.6816 <sup>+2</sup> | y <sub>5</sub> <sup>+2</sup>                   | 622.3483 <sup>+2</sup> | y <sub>12</sub> <sup>+2</sup>                  | 982.484                 | b <sub>11</sub> -H <sub>3</sub> PO <sub>4</sub>               | 1366.6849               | b <sub>15</sub> -H <sub>3</sub> PO <sub>4</sub> | 1984.0233 | y <sub>20</sub> -H <sub>3</sub> PO <sub>4</sub> |
| 337.187                | b <sub>4</sub> -H <sub>3</sub> PO <sub>4</sub> | 672.8721 <sup>+2</sup> | y <sub>13</sub> <sup>+2</sup>                  | 992.5153 <sup>+2</sup>  | y <sub>20</sub> -H <sub>3</sub> PO <sub>4</sub> <sup>+2</sup> | 1377.6298               | b <sub>14</sub>                                 | 1991.9573 | b <sub>20</sub>                                 |
| 338.1112               | b <sub>3</sub>                                 | 680.2651               | b <sub>7</sub>                                 | 1009.4238               | b <sub>10</sub>                                               | 1459.7639               | y <sub>14</sub>                                 | 2008.0233 | b <sub>21</sub> -H <sub>3</sub> PO <sub>4</sub> |
| 345.1951 <sup>+2</sup> | y <sub>6</sub> <sup>+2</sup>                   | 689.3828               | y <sub>6</sub>                                 | 1028.0339 <sup>+2</sup> | y <sub>21</sub> -H <sub>3</sub> PO <sub>4</sub> <sup>+2</sup> | 1464.6618               | b <sub>15</sub>                                 | 2055.0604 | y <sub>21</sub> -H <sub>3</sub> PO <sub>4</sub> |
| 374.2398               | y <sub>3</sub>                                 | 695.3723               | b <sub>8</sub> -H <sub>3</sub> PO <sub>4</sub> | 1041.5037 <sup>+2</sup> | y <sub>20</sub> <sup>+2</sup>                                 | 1465.7533               | b <sub>16</sub> -H <sub>3</sub> PO <sub>4</sub> | 2082.0002 | y <sub>20</sub>                                 |
| 394.2085               | b <sub>5</sub> -H <sub>3</sub> PO <sub>4</sub> | 730.3856 <sup>+2</sup> | y <sub>14</sub> <sup>+2</sup>                  | 1075.5994               | y <sub>10</sub>                                               | 1563.7302               | b <sub>16</sub>                                 | 2106.0002 | b <sub>21</sub>                                 |
| 394.7293 <sup>+2</sup> | y <sub>7</sub> <sup>+2</sup>                   | 786.9276 <sup>+2</sup> | y <sub>15</sub> <sup>+2</sup>                  | 1077.0223 <sup>+2</sup> | y <sub>21</sub> <sup>+2</sup>                                 | 1572.8479               | y <sub>15</sub>                                 | 2153.0373 | y <sub>21</sub>                                 |
| 435.1639               | b <sub>4</sub>                                 | 788.4512               | y <sub>7</sub>                                 | 1077.5681 <sup>+2</sup> | MH-H <sub>3</sub> PO <sub>4</sub> <sup>+2</sup>               | 1580.7802               | b <sub>17</sub> -H <sub>3</sub> PO <sub>4</sub> | 2154.1289 | MH-H <sub>3</sub> PO <sub>4</sub>               |
| 438.2453 <sup>+2</sup> | y <sub>8</sub> <sup>+2</sup>                   | 793.3492               | b <sub>8</sub>                                 | 1079.5368               | b <sub>12</sub> -H <sub>3</sub> PO <sub>4</sub>               | 1667.8123               | b <sub>18</sub> -H <sub>3</sub> PO <sub>4</sub> | 2252.1057 | MH                                              |
| 481.2405               | b <sub>6</sub> -H <sub>3</sub> PO <sub>4</sub> | 810.3992               | b <sub>9</sub> -H <sub>3</sub> PO <sub>4</sub> | 1080.4609               | b <sub>11</sub>                                               | 1673.8956               | y <sub>16</sub>                                 |           |                                                 |

MS/MS Fragmentation of AIsSANLLVR  
 Found in IPI00167909, echinoderm microtubule associated protein like 3

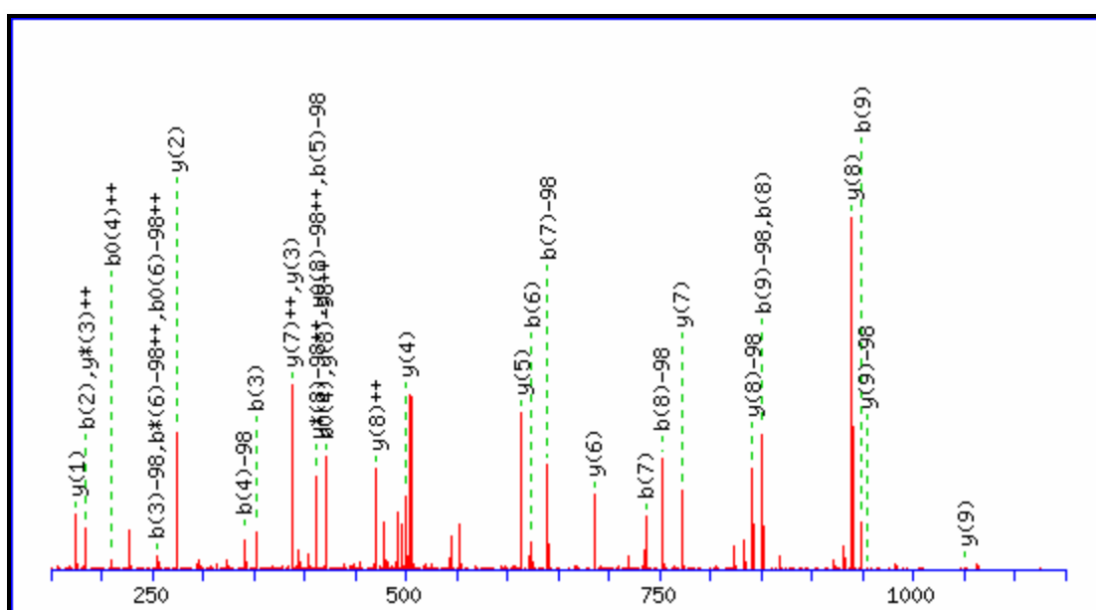

|                        |                                                |                        |                                                              |                        |                                                              |          |                                                |           |                                                |
|------------------------|------------------------------------------------|------------------------|--------------------------------------------------------------|------------------------|--------------------------------------------------------------|----------|------------------------------------------------|-----------|------------------------------------------------|
| 88.0631 <sup>+2</sup>  | y <sub>1</sub> <sup>+2</sup>                   | 341.1819               | b <sub>4</sub> -H <sub>3</sub> PO <sub>4</sub>               | 477.7902 <sup>+2</sup> | y <sub>9</sub> -H <sub>3</sub> PO <sub>4</sub> <sup>+2</sup> | 639.3461 | b <sub>7</sub> -H <sub>3</sub> PO <sub>4</sub> | 949.4754  | b <sub>9</sub>                                 |
| 137.5973 <sup>+2</sup> | y <sub>2</sub> <sup>+2</sup>                   | 343.2214 <sup>+2</sup> | y <sub>6</sub> <sup>+2</sup>                                 | 500.3555               | y <sub>4</sub>                                               | 685.4355 | y <sub>6</sub>                                 | 954.5731  | y <sub>9</sub> -H <sub>3</sub> PO <sub>4</sub> |
| 175.119                | y <sub>1</sub>                                 | 352.1268               | b <sub>3</sub>                                               | 510.196                | b <sub>5</sub>                                               | 737.3229 | b <sub>7</sub>                                 | 1025.6102 | MH-H <sub>3</sub> PO <sub>4</sub>              |
| 185.1285               | b <sub>2</sub>                                 | 386.7374 <sup>+2</sup> | y <sub>7</sub> <sup>+2</sup>                                 | 513.3087 <sup>+2</sup> | MH-H <sub>3</sub> PO <sub>4</sub> <sup>+2</sup>              | 752.4301 | b <sub>8</sub> -H <sub>3</sub> PO <sub>4</sub> | 1052.55   | y <sub>9</sub>                                 |
| 194.1394 <sup>+2</sup> | y <sub>3</sub> <sup>+2</sup>                   | 387.2714               | y <sub>3</sub>                                               | 526.262                | b <sub>6</sub> -H <sub>3</sub> PO <sub>4</sub>               | 772.4676 | y <sub>7</sub>                                 | 1123.5871 | MH                                             |
| 250.6814 <sup>+2</sup> | y <sub>4</sub> <sup>+2</sup>                   | 412.2191               | b <sub>5</sub> -H <sub>3</sub> PO <sub>4</sub>               | 526.7786 <sup>+2</sup> | y <sub>9</sub> <sup>+2</sup>                                 | 841.489  | y <sub>8</sub> -H <sub>3</sub> PO <sub>4</sub> |           |                                                |
| 254.1499               | b <sub>3</sub> -H <sub>3</sub> PO <sub>4</sub> | 421.2482 <sup>+2</sup> | y <sub>8</sub> -H <sub>3</sub> PO <sub>4</sub> <sup>+2</sup> | 562.2972 <sup>+2</sup> | MH <sup>+2</sup>                                             | 850.407  | b <sub>8</sub>                                 |           |                                                |
| 274.1874               | y <sub>2</sub>                                 | 439.1588               | b <sub>4</sub>                                               | 614.3984               | y <sub>5</sub>                                               | 851.4985 | b <sub>9</sub> -H <sub>3</sub> PO <sub>4</sub> |           |                                                |
| 307.7028 <sup>+2</sup> | y <sub>5</sub> <sup>+2</sup>                   | 470.2366 <sup>+2</sup> | y <sub>8</sub> <sup>+2</sup>                                 | 624.2389               | b <sub>6</sub>                                               | 939.4659 | y <sub>8</sub>                                 |           |                                                |

MS/MS Fragmentation of KAIsSANLLVR  
 Found in IPI00167909, echinoderm microtubule associated protein like 3

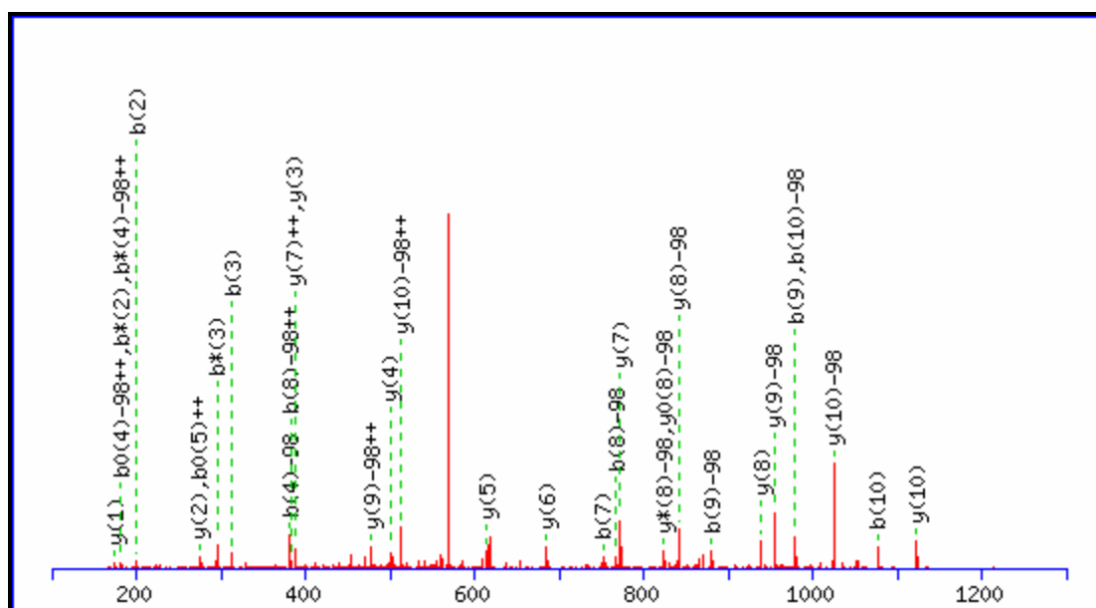

|                        |                                                              |                        |                                                              |                        |                                                               |                        |                                                 |           |                                                 |
|------------------------|--------------------------------------------------------------|------------------------|--------------------------------------------------------------|------------------------|---------------------------------------------------------------|------------------------|-------------------------------------------------|-----------|-------------------------------------------------|
| 88.0631 <sup>+2</sup>  | y <sub>1</sub> <sup>+2</sup>                                 | 284.1305 <sup>+2</sup> | b <sub>5</sub> <sup>+2</sup>                                 | 440.7662 <sup>+2</sup> | b <sub>9</sub> -H <sub>3</sub> PO <sub>4</sub> <sup>+2</sup>  | 567.2538               | b <sub>5</sub>                                  | 939.4659  | y <sub>8</sub>                                  |
| 100.5733 <sup>+2</sup> | b <sub>2</sub> <sup>+2</sup>                                 | 307.7028 <sup>+2</sup> | y <sub>5</sub> <sup>+2</sup>                                 | 469.2769               | b <sub>5</sub> -H <sub>3</sub> PO <sub>4</sub>                | 577.3562 <sup>+2</sup> | MH-H <sub>3</sub> PO <sub>4</sub> <sup>+2</sup> | 954.5731  | y <sub>9</sub> -H <sub>3</sub> PO <sub>4</sub>  |
| 137.5973 <sup>+2</sup> | y <sub>2</sub> <sup>+2</sup>                                 | 313.2234               | b <sub>3</sub>                                               | 470.2366 <sup>+2</sup> | y <sub>8</sub> <sup>+2</sup>                                  | 614.3984               | y <sub>5</sub>                                  | 978.502   | b <sub>9</sub>                                  |
| 157.1153 <sup>+2</sup> | b <sub>3</sub> <sup>+2</sup>                                 | 319.6491 <sup>+2</sup> | b <sub>6</sub> <sup>+2</sup>                                 | 477.7902 <sup>+2</sup> | y <sub>9</sub> -H <sub>3</sub> PO <sub>4</sub> <sup>+2</sup>  | 626.3447 <sup>+2</sup> | MH <sup>+2</sup>                                | 979.5935  | b <sub>10</sub> -H <sub>3</sub> PO <sub>4</sub> |
| 175.119                | y <sub>1</sub>                                               | 327.6821 <sup>+2</sup> | b <sub>7</sub> -H <sub>3</sub> PO <sub>4</sub> <sup>+2</sup> | 480.2218               | b <sub>4</sub>                                                | 638.2909               | b <sub>6</sub>                                  | 1025.6102 | y <sub>10</sub> -H <sub>3</sub> PO <sub>4</sub> |
| 191.6261 <sup>+2</sup> | b <sub>4</sub> -H <sub>3</sub> PO <sub>4</sub> <sup>+2</sup> | 343.2214 <sup>+2</sup> | y <sub>6</sub> <sup>+2</sup>                                 | 489.7546 <sup>+2</sup> | b <sub>9</sub> <sup>+2</sup>                                  | 654.357                | b <sub>7</sub> -H <sub>3</sub> PO <sub>4</sub>  | 1052.55   | y <sub>9</sub>                                  |
| 194.1394 <sup>+2</sup> | y <sub>3</sub> <sup>+2</sup>                                 | 376.6706 <sup>+2</sup> | b <sub>7</sub> <sup>+2</sup>                                 | 490.3004 <sup>+2</sup> | b <sub>10</sub> -H <sub>3</sub> PO <sub>4</sub> <sup>+2</sup> | 685.4355               | y <sub>6</sub>                                  | 1077.5704 | b <sub>10</sub>                                 |
| 200.1394               | b <sub>2</sub>                                               | 382.2449               | b <sub>4</sub> -H <sub>3</sub> PO <sub>4</sub>               | 500.3555               | y <sub>4</sub>                                                | 752.3338               | b <sub>7</sub>                                  | 1123.5871 | y <sub>10</sub>                                 |
| 235.1421 <sup>+2</sup> | b <sub>5</sub> -H <sub>3</sub> PO <sub>4</sub> <sup>+2</sup> | 384.2241 <sup>+2</sup> | b <sub>8</sub> -H <sub>3</sub> PO <sub>4</sub> <sup>+2</sup> | 513.3087 <sup>+2</sup> | y <sub>10</sub> -H <sub>3</sub> PO <sub>4</sub> <sup>+2</sup> | 767.441                | b <sub>8</sub> -H <sub>3</sub> PO <sub>4</sub>  | 1153.7052 | MH-H <sub>3</sub> PO <sub>4</sub>               |
| 240.6145 <sup>+2</sup> | b <sub>4</sub> <sup>+2</sup>                                 | 386.7374 <sup>+2</sup> | y <sub>7</sub> <sup>+2</sup>                                 | 526.7786 <sup>+2</sup> | y <sub>9</sub> <sup>+2</sup>                                  | 772.4676               | y <sub>7</sub>                                  | 1251.6821 | MH                                              |
| 250.6814 <sup>+2</sup> | y <sub>4</sub> <sup>+2</sup>                                 | 387.2714               | y <sub>3</sub>                                               | 539.2888 <sup>+2</sup> | b <sub>10</sub> <sup>+2</sup>                                 | 841.489                | y <sub>8</sub> -H <sub>3</sub> PO <sub>4</sub>  |           |                                                 |
| 270.6606 <sup>+2</sup> | b <sub>6</sub> -H <sub>3</sub> PO <sub>4</sub> <sup>+2</sup> | 421.2482 <sup>+2</sup> | y <sub>8</sub> -H <sub>3</sub> PO <sub>4</sub> <sup>+2</sup> | 540.314                | b <sub>6</sub> -H <sub>3</sub> PO <sub>4</sub>                | 865.4179               | b <sub>8</sub>                                  |           |                                                 |
| 274.1874               | y <sub>2</sub>                                               | 433.2126 <sup>+2</sup> | b <sub>8</sub> <sup>+2</sup>                                 | 562.2972 <sup>+2</sup> | y <sub>10</sub> <sup>+2</sup>                                 | 880.5251               | b <sub>9</sub> -H <sub>3</sub> PO <sub>4</sub>  |           |                                                 |

MS/MS Fragmentation of TPsLSPASSLDV  
 Found in IPI00167909, echinoderm microtubule associated protein like 3

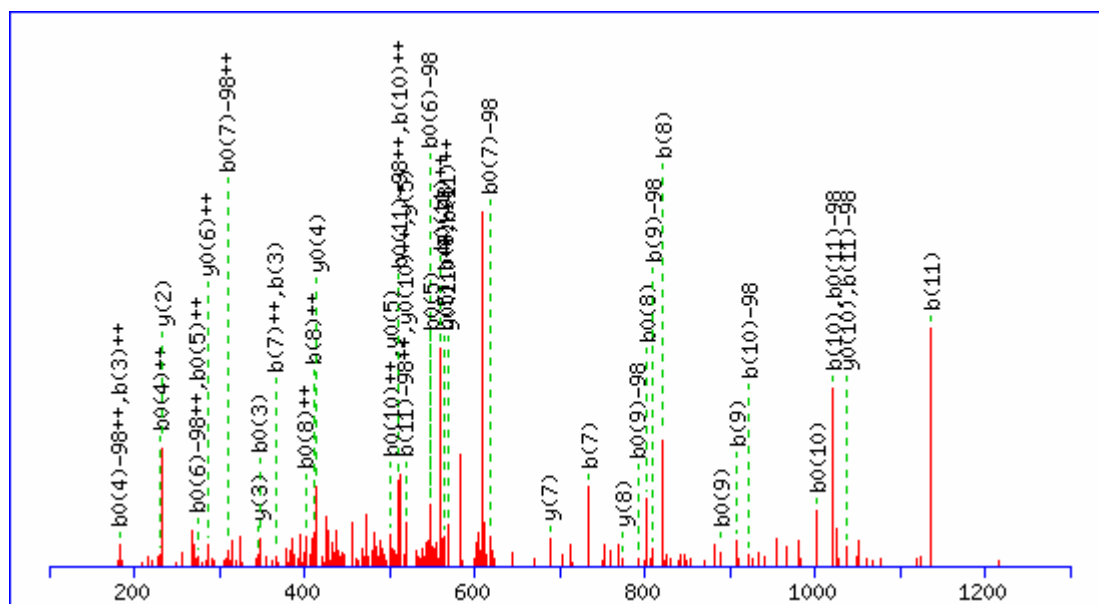

|          |                                                |          |                                                |          |                                                |           |                                                 |           |                                                 |
|----------|------------------------------------------------|----------|------------------------------------------------|----------|------------------------------------------------|-----------|-------------------------------------------------|-----------|-------------------------------------------------|
| 118.0863 | y <sub>1</sub>                                 | 433.2293 | y <sub>4</sub>                                 | 636.3352 | b <sub>7</sub> -H <sub>3</sub> PO <sub>4</sub> | 821.3441  | b <sub>8</sub>                                  | 1054.5415 | y <sub>11</sub> -H <sub>3</sub> PO <sub>4</sub> |
| 199.1077 | b <sub>2</sub>                                 | 468.2453 | b <sub>5</sub> -H <sub>3</sub> PO <sub>4</sub> | 663.2749 | b <sub>6</sub>                                 | 888.4673  | y <sub>9</sub>                                  | 1055.4656 | y <sub>10</sub>                                 |
| 233.1132 | y <sub>2</sub>                                 | 479.1901 | b <sub>4</sub>                                 | 688.3512 | y <sub>7</sub>                                 | 908.3761  | b <sub>9</sub>                                  | 1136.4871 | b <sub>11</sub>                                 |
| 268.1292 | b <sub>3</sub> -H <sub>3</sub> PO <sub>4</sub> | 520.2613 | y <sub>5</sub>                                 | 723.3672 | b <sub>8</sub> -H <sub>3</sub> PO <sub>4</sub> | 923.4833  | b <sub>10</sub> -H <sub>3</sub> PO <sub>4</sub> | 1152.5184 | y <sub>11</sub>                                 |
| 346.1973 | y <sub>3</sub>                                 | 565.298  | b <sub>6</sub> -H <sub>3</sub> PO <sub>4</sub> | 734.312  | b <sub>7</sub>                                 | 957.4888  | y <sub>10</sub> -H <sub>3</sub> PO <sub>4</sub> | 1155.5892 | MH-H <sub>3</sub> PO <sub>4</sub>               |
| 366.1061 | b <sub>3</sub>                                 | 566.2222 | b <sub>5</sub>                                 | 775.3832 | y <sub>8</sub>                                 | 1021.4602 | b <sub>10</sub>                                 | 1253.5661 | MH                                              |
| 381.2132 | b <sub>4</sub> -H <sub>3</sub> PO <sub>4</sub> | 591.2984 | y <sub>6</sub>                                 | 810.3992 | b <sub>9</sub> -H <sub>3</sub> PO <sub>4</sub> | 1038.5102 | b <sub>11</sub> -H <sub>3</sub> PO <sub>4</sub> |           |                                                 |

MS/MS Fragmentation of VLGAGGAGPAPATPsR  
 Found in IPI00167909, echinoderm microtubule associated protein like 3

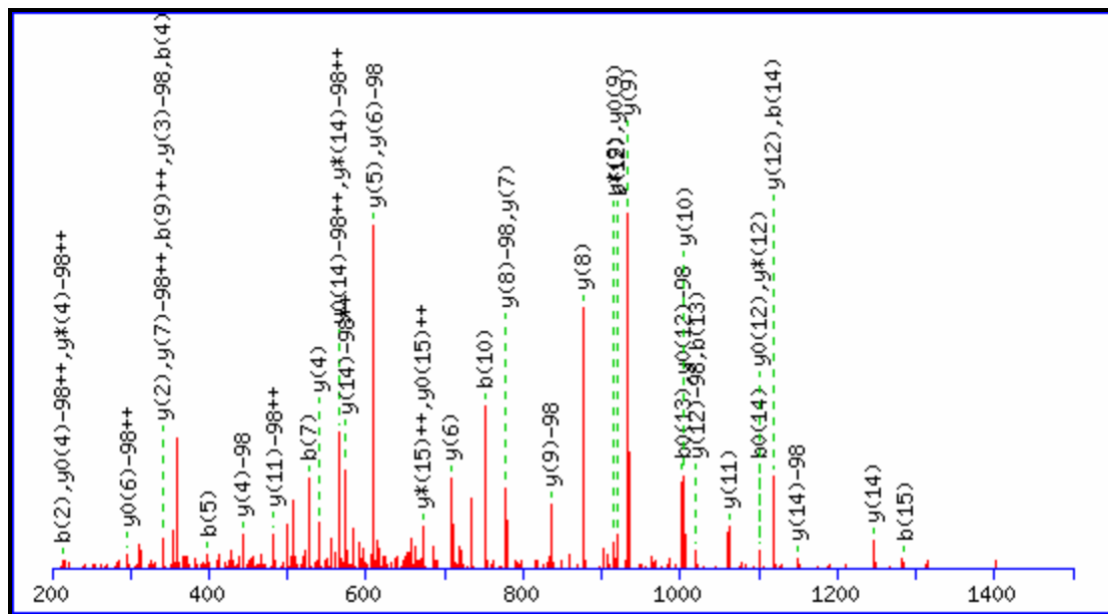

|                        |                                                              |                        |                                                               |                        |                                                               |                        |                                                 |           |                                                 |
|------------------------|--------------------------------------------------------------|------------------------|---------------------------------------------------------------|------------------------|---------------------------------------------------------------|------------------------|-------------------------------------------------|-----------|-------------------------------------------------|
| 88.0631 <sup>+2</sup>  | y <sub>1</sub> <sup>+2</sup>                                 | 341.2183               | b <sub>4</sub>                                                | 513.278                | y <sub>5</sub> -H <sub>3</sub> PO <sub>4</sub>                | 681.3678               | y <sub>7</sub> -H <sub>3</sub> PO <sub>4</sub>  | 1061.4775 | y <sub>11</sub>                                 |
| 122.5738 <sup>+2</sup> | y <sub>2</sub> -H <sub>3</sub> PO <sub>4</sub> <sup>+2</sup> | 342.1173               | y <sub>2</sub>                                                | 526.2984               | b <sub>7</sub>                                                | 708.3076               | y <sub>6</sub>                                  | 1091.5592 | y <sub>13</sub> -H <sub>3</sub> PO <sub>4</sub> |
| 171.1002 <sup>+2</sup> | y <sub>3</sub> -H <sub>3</sub> PO <sub>4</sub> <sup>+2</sup> | 354.6575 <sup>+2</sup> | y <sub>6</sub> <sup>+2</sup>                                  | 531.2424 <sup>+2</sup> | y <sub>11</sub> <sup>+2</sup>                                 | 729.8587 <sup>+2</sup> | MH <sup>+2</sup>                                | 1117.6    | b <sub>14</sub>                                 |
| 171.5623 <sup>+2</sup> | y <sub>2</sub> <sup>+2</sup>                                 | 389.7139 <sup>+2</sup> | y <sub>8</sub> -H <sub>3</sub> PO <sub>4</sub> <sup>+2</sup>  | 540.2178               | y <sub>4</sub>                                                | 751.4097               | b <sub>10</sub>                                 | 1118.499  | y <sub>12</sub>                                 |
| 175.119                | y <sub>1</sub>                                               | 390.1760 <sup>+2</sup> | y <sub>7</sub> <sup>+2</sup>                                  | 546.2833 <sup>+2</sup> | y <sub>13</sub> -H <sub>3</sub> PO <sub>4</sub> <sup>+2</sup> | 778.4206               | y <sub>8</sub> -H <sub>3</sub> PO <sub>4</sub>  | 1148.5807 | y <sub>14</sub> -H <sub>3</sub> PO <sub>4</sub> |
| 213.1598               | b <sub>2</sub>                                               | 398.2398               | b <sub>5</sub>                                                | 559.7531 <sup>+2</sup> | y <sub>12</sub> <sup>+2</sup>                                 | 779.3447               | y <sub>7</sub>                                  | 1186.6215 | b <sub>15</sub> -H <sub>3</sub> PO <sub>4</sub> |
| 220.0887 <sup>+2</sup> | y <sub>3</sub> <sup>+2</sup>                                 | 418.2247 <sup>+2</sup> | y <sub>9</sub> -H <sub>3</sub> PO <sub>4</sub> <sup>+2</sup>  | 574.7940 <sup>+2</sup> | y <sub>14</sub> -H <sub>3</sub> PO <sub>4</sub> <sup>+2</sup> | 835.4421               | y <sub>9</sub> -H <sub>3</sub> PO <sub>4</sub>  | 1189.5361 | y <sub>13</sub>                                 |
| 221.6241 <sup>+2</sup> | y <sub>4</sub> -H <sub>3</sub> PO <sub>4</sub> <sup>+2</sup> | 438.7024 <sup>+2</sup> | y <sub>8</sub> <sup>+2</sup>                                  | 583.3198               | b <sub>8</sub>                                                | 848.4625               | b <sub>11</sub>                                 | 1246.5576 | y <sub>14</sub>                                 |
| 244.1404               | y <sub>2</sub> -H <sub>3</sub> PO <sub>4</sub>               | 439.1701               | y <sub>3</sub>                                                | 595.2717 <sup>+2</sup> | y <sub>13</sub> <sup>+2</sup>                                 | 876.3975               | y <sub>8</sub>                                  | 1261.6648 | y <sub>15</sub> -H <sub>3</sub> PO <sub>4</sub> |
| 257.1426 <sup>+2</sup> | y <sub>5</sub> -H <sub>3</sub> PO <sub>4</sub> <sup>+2</sup> | 442.2409               | y <sub>4</sub> -H <sub>3</sub> PO <sub>4</sub>                | 610.3307               | y <sub>6</sub> -H <sub>3</sub> PO <sub>4</sub>                | 906.4792               | y <sub>10</sub> -H <sub>3</sub> PO <sub>4</sub> | 1284.5984 | b <sub>15</sub>                                 |
| 270.1812               | b <sub>3</sub>                                               | 453.7432 <sup>+2</sup> | y <sub>10</sub> -H <sub>3</sub> PO <sub>4</sub> <sup>+2</sup> | 611.2549               | y <sub>5</sub>                                                | 919.4996               | b <sub>12</sub>                                 | 1359.6417 | y <sub>15</sub>                                 |
| 270.6125 <sup>+2</sup> | y <sub>4</sub> <sup>+2</sup>                                 | 455.2613               | b <sub>6</sub>                                                | 623.7824 <sup>+2</sup> | y <sub>14</sub> <sup>+2</sup>                                 | 933.419                | y <sub>9</sub>                                  | 1360.7332 | MH-H <sub>3</sub> PO <sub>4</sub>               |
| 305.6690 <sup>+2</sup> | y <sub>6</sub> -H <sub>3</sub> PO <sub>4</sub> <sup>+2</sup> | 467.2131 <sup>+2</sup> | y <sub>9</sub> <sup>+2</sup>                                  | 631.3360 <sup>+2</sup> | y <sub>15</sub> -H <sub>3</sub> PO <sub>4</sub> <sup>+2</sup> | 963.5007               | y <sub>11</sub> -H <sub>3</sub> PO <sub>4</sub> | 1458.7101 | MH                                              |
| 306.1311 <sup>+2</sup> | y <sub>5</sub> <sup>+2</sup>                                 | 482.2540 <sup>+2</sup> | y <sub>11</sub> -H <sub>3</sub> PO <sub>4</sub> <sup>+2</sup> | 680.3245 <sup>+2</sup> | y <sub>15</sub> <sup>+2</sup>                                 | 1004.4561              | y <sub>10</sub>                                 |           |                                                 |
| 341.1876 <sup>+2</sup> | y <sub>7</sub> -H <sub>3</sub> PO <sub>4</sub> <sup>+2</sup> | 502.7317 <sup>+2</sup> | y <sub>10</sub> <sup>+2</sup>                                 | 680.3726               | b <sub>9</sub>                                                | 1020.5221              | y <sub>12</sub> -H <sub>3</sub> PO <sub>4</sub> |           |                                                 |
| 341.1932               | y <sub>3</sub> -H <sub>3</sub> PO <sub>4</sub>               | 510.7647 <sup>+2</sup> | y <sub>12</sub> -H <sub>3</sub> PO <sub>4</sub> <sup>+2</sup> | 680.8702 <sup>+2</sup> | MH-H <sub>3</sub> PO <sub>4</sub> <sup>+2</sup>               | 1020.5473              | b <sub>13</sub>                                 |           |                                                 |

MS/MS Fragmentation of VLGAGGAGPAPAtPSRTPSLSPASSLDV  
 Found in IPI00167909, echinoderm microtubule associated protein like 3

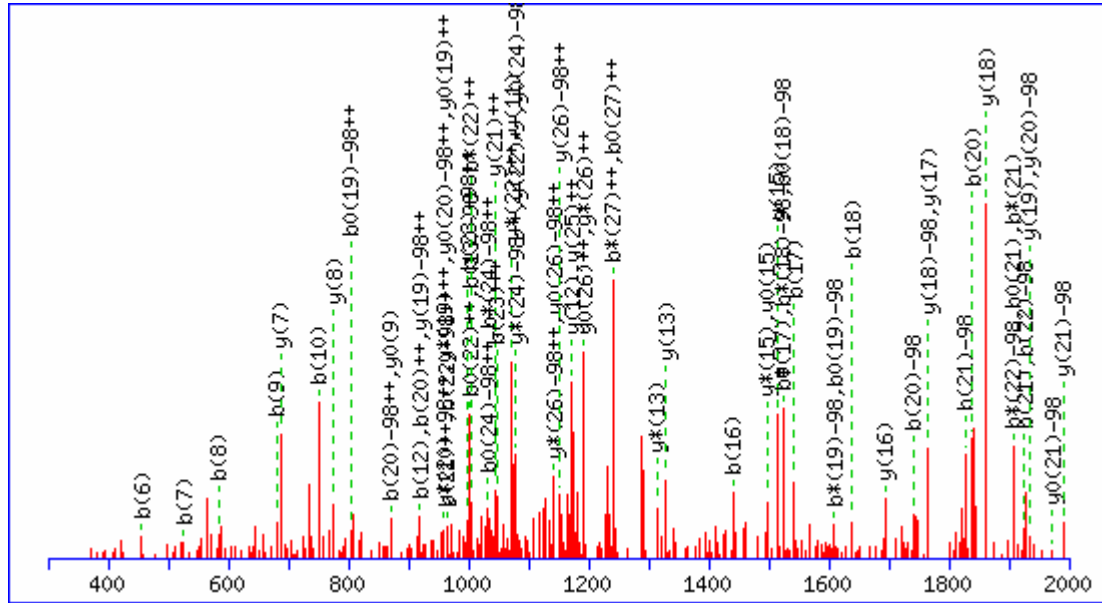

|                        |                                                               |                         |                                                               |                         |                                                               |                         |                                                 |           |                                                 |
|------------------------|---------------------------------------------------------------|-------------------------|---------------------------------------------------------------|-------------------------|---------------------------------------------------------------|-------------------------|-------------------------------------------------|-----------|-------------------------------------------------|
| 118.0863               | y <sub>1</sub>                                                | 819.9036 <sup>+2</sup>  | b <sub>18</sub> <sup>+2</sup>                                 | 1047.5226 <sup>+2</sup> | b <sub>23</sub> <sup>+2</sup>                                 | 1307.1496 <sup>+2</sup> | MH <sup>+2</sup>                                | 1996.061  | b <sub>23</sub> -H <sub>3</sub> PO <sub>4</sub> |
| 213.1598               | b <sub>2</sub>                                                | 834.4336 <sup>+2</sup>  | y <sub>17</sub> -H <sub>3</sub> PO <sub>4</sub> <sup>+2</sup> | 1059.5449 <sup>+2</sup> | y <sub>23</sub> -H <sub>3</sub> PO <sub>4</sub> <sup>+2</sup> | 1329.7009               | y <sub>13</sub>                                 | 2023.0008 | b <sub>22</sub>                                 |
| 233.1132               | y <sub>2</sub>                                                | 847.9035 <sup>+2</sup>  | y <sub>16</sub> <sup>+2</sup>                                 | 1072.5521               | y <sub>11</sub>                                               | 1342.7226               | b <sub>16</sub> -H <sub>3</sub> PO <sub>4</sub> | 2030.9794 | y <sub>20</sub>                                 |
| 270.1812               | b <sub>3</sub>                                                | 848.4625                | b <sub>11</sub>                                               | 1080.0226 <sup>+2</sup> | y <sub>22</sub> <sup>+2</sup>                                 | 1416.7329               | y <sub>14</sub>                                 | 2061.0611 | y <sub>22</sub> -H <sub>3</sub> PO <sub>4</sub> |
| 341.2183               | b <sub>4</sub>                                                | 863.4196 <sup>+2</sup>  | b <sub>19</sub> <sup>+2</sup>                                 | 1085.5662 <sup>+2</sup> | b <sub>25</sub> -H <sub>3</sub> PO <sub>4</sub> <sup>+2</sup> | 1440.6995               | b <sub>16</sub>                                 | 2083.0931 | b <sub>24</sub> -H <sub>3</sub> PO <sub>4</sub> |
| 346.1973               | y <sub>3</sub>                                                | 870.9732 <sup>+2</sup>  | b <sub>20</sub> -H <sub>3</sub> PO <sub>4</sub> <sup>+2</sup> | 1088.0557 <sup>+2</sup> | y <sub>24</sub> -H <sub>3</sub> PO <sub>4</sub> <sup>+2</sup> | 1443.7703               | b <sub>17</sub> -H <sub>3</sub> PO <sub>4</sub> | 2088.0009 | y <sub>21</sub>                                 |
| 398.2398               | b <sub>5</sub>                                                | 882.9600 <sup>+2</sup>  | y <sub>18</sub> -H <sub>3</sub> PO <sub>4</sub> <sup>+2</sup> | 1091.0386 <sup>+2</sup> | b <sub>24</sub> <sup>+2</sup>                                 | 1513.7857               | y <sub>15</sub>                                 | 2094.0379 | b <sub>23</sub>                                 |
| 433.2293               | y <sub>4</sub>                                                | 883.4220 <sup>+2</sup>  | y <sub>17</sub> <sup>+2</sup>                                 | 1099.5895               | b <sub>14</sub> -H <sub>3</sub> PO <sub>4</sub>               | 1540.8231               | b <sub>18</sub> -H <sub>3</sub> PO <sub>4</sub> | 2118.0826 | y <sub>23</sub> -H <sub>3</sub> PO <sub>4</sub> |
| 455.2613               | b <sub>6</sub>                                                | 888.4673                | y <sub>9</sub>                                                | 1100.5136               | b <sub>13</sub>                                               | 1541.7472               | b <sub>17</sub>                                 | 2159.038  | y <sub>22</sub>                                 |
| 520.2613               | y <sub>5</sub>                                                | 914.4892 <sup>+2</sup>  | b <sub>21</sub> -H <sub>3</sub> PO <sub>4</sub> <sup>+2</sup> | 1108.5334 <sup>+2</sup> | y <sub>23</sub> <sup>+2</sup>                                 | 1596.8228               | y <sub>16</sub> -H <sub>3</sub> PO <sub>4</sub> | 2170.1251 | b <sub>25</sub> -H <sub>3</sub> PO <sub>4</sub> |
| 526.2984               | b <sub>7</sub>                                                | 918.4785 <sup>+2</sup>  | y <sub>19</sub> -H <sub>3</sub> PO <sub>4</sub> <sup>+2</sup> | 1123.5742 <sup>+2</sup> | y <sub>25</sub> -H <sub>3</sub> PO <sub>4</sub> <sup>+2</sup> | 1627.8551               | b <sub>19</sub> -H <sub>3</sub> PO <sub>4</sub> | 2175.104  | y <sub>24</sub> -H <sub>3</sub> PO <sub>4</sub> |
| 583.3198               | b <sub>8</sub>                                                | 919.4996                | b <sub>12</sub>                                               | 1134.5546 <sup>+2</sup> | b <sub>25</sub> <sup>+2</sup>                                 | 1638.7999               | b <sub>18</sub>                                 | 2181.07   | b <sub>24</sub>                                 |
| 591.2984               | y <sub>6</sub>                                                | 919.9617 <sup>+2</sup>  | b <sub>20</sub> <sup>+2</sup>                                 | 1137.0441 <sup>+2</sup> | y <sub>24</sub> <sup>+2</sup>                                 | 1667.8599               | y <sub>17</sub> -H <sub>3</sub> PO <sub>4</sub> | 2216.0595 | y <sub>23</sub>                                 |
| 665.3541 <sup>+2</sup> | y <sub>13</sub> <sup>+2</sup>                                 | 931.9484 <sup>+2</sup>  | y <sub>18</sub> <sup>+2</sup>                                 | 1142.1082 <sup>+2</sup> | b <sub>26</sub> -H <sub>3</sub> PO <sub>4</sub> <sup>+2</sup> | 1694.7997               | y <sub>16</sub>                                 | 2246.1412 | y <sub>25</sub> -H <sub>3</sub> PO <sub>4</sub> |
| 671.8649 <sup>+2</sup> | b <sub>16</sub> -H <sub>3</sub> PO <sub>4</sub> <sup>+2</sup> | 963.0156 <sup>+2</sup>  | b <sub>22</sub> -H <sub>3</sub> PO <sub>4</sub> <sup>+2</sup> | 1152.0849 <sup>+2</sup> | y <sub>26</sub> -H <sub>3</sub> PO <sub>4</sub> <sup>+2</sup> | 1725.832                | b <sub>19</sub>                                 | 2268.102  | b <sub>25</sub>                                 |
| 680.3726               | b <sub>9</sub>                                                | 963.4777 <sup>+2</sup>  | b <sub>21</sub> <sup>+2</sup>                                 | 1172.5627 <sup>+2</sup> | y <sub>25</sub> <sup>+2</sup>                                 | 1740.9391               | b <sub>20</sub> -H <sub>3</sub> PO <sub>4</sub> | 2273.0809 | y <sub>24</sub>                                 |
| 688.3512               | y <sub>7</sub>                                                | 967.0049 <sup>+2</sup>  | y <sub>20</sub> -H <sub>3</sub> PO <sub>4</sub> <sup>+2</sup> | 1173.5998               | y <sub>12</sub>                                               | 1764.9127               | y <sub>18</sub> -H <sub>3</sub> PO <sub>4</sub> | 2283.2092 | b <sub>26</sub> -H <sub>3</sub> PO <sub>4</sub> |
| 708.8701 <sup>+2</sup> | y <sub>14</sub> <sup>+2</sup>                                 | 967.4670 <sup>+2</sup>  | y <sub>19</sub> <sup>+2</sup>                                 | 1186.6215               | b <sub>15</sub> -H <sub>3</sub> PO <sub>4</sub>               | 1765.8368               | y <sub>17</sub>                                 | 2303.1626 | y <sub>26</sub> -H <sub>3</sub> PO <sub>4</sub> |
| 720.8534 <sup>+2</sup> | b <sub>16</sub> <sup>+2</sup>                                 | 975.4993                | y <sub>10</sub>                                               | 1191.0967 <sup>+2</sup> | b <sub>26</sub> <sup>+2</sup>                                 | 1827.9712               | b <sub>21</sub> -H <sub>3</sub> PO <sub>4</sub> | 2344.118  | y <sub>25</sub>                                 |
| 722.3888 <sup>+2</sup> | b <sub>17</sub> -H <sub>3</sub> PO <sub>4</sub> <sup>+2</sup> | 995.5156 <sup>+2</sup>  | y <sub>21</sub> -H <sub>3</sub> PO <sub>4</sub> <sup>+2</sup> | 1197.5664               | b <sub>14</sub>                                               | 1835.9498               | y <sub>19</sub> -H <sub>3</sub> PO <sub>4</sub> | 2381.1861 | b <sub>26</sub>                                 |
| 751.4097               | b <sub>10</sub>                                               | 998.5342 <sup>+2</sup>  | b <sub>23</sub> -H <sub>3</sub> PO <sub>4</sub> <sup>+2</sup> | 1199.6217 <sup>+2</sup> | b <sub>27</sub> -H <sub>3</sub> PO <sub>4</sub> <sup>+2</sup> | 1838.916                | b <sub>20</sub>                                 | 2398.2361 | b <sub>27</sub> -H <sub>3</sub> PO <sub>4</sub> |
| 757.3965 <sup>+2</sup> | y <sub>15</sub> <sup>+2</sup>                                 | 1002.5367               | b <sub>13</sub> -H <sub>3</sub> PO <sub>4</sub>               | 1201.0734 <sup>+2</sup> | y <sub>26</sub> <sup>+2</sup>                                 | 1862.8895               | y <sub>18</sub>                                 | 2401.1395 | y <sub>26</sub>                                 |
| 770.9152 <sup>+2</sup> | b <sub>18</sub> -H <sub>3</sub> PO <sub>4</sub> <sup>+2</sup> | 1012.0041 <sup>+2</sup> | b <sub>22</sub> <sup>+2</sup>                                 | 1208.6270 <sup>+2</sup> | y <sub>27</sub> -H <sub>3</sub> PO <sub>4</sub> <sup>+2</sup> | 1925.0239               | b <sub>22</sub> -H <sub>3</sub> PO <sub>4</sub> | 2416.2467 | y <sub>27</sub> -H <sub>3</sub> PO <sub>4</sub> |
| 771.3772 <sup>+2</sup> | b <sub>17</sub> <sup>+2</sup>                                 | 1015.9934 <sup>+2</sup> | y <sub>20</sub> <sup>+2</sup>                                 | 1248.6101 <sup>+2</sup> | b <sub>27</sub> <sup>+2</sup>                                 | 1925.9481               | b <sub>21</sub>                                 | 2496.213  | b <sub>27</sub>                                 |
| 775.3832               | y <sub>8</sub>                                                | 1031.0342 <sup>+2</sup> | y <sub>22</sub> -H <sub>3</sub> PO <sub>4</sub> <sup>+2</sup> | 1257.6154 <sup>+2</sup> | y <sub>27</sub> <sup>+2</sup>                                 | 1933.0025               | y <sub>20</sub> -H <sub>3</sub> PO <sub>4</sub> | 2514.2236 | y <sub>27</sub>                                 |
| 798.9150 <sup>+2</sup> | y <sub>16</sub> -H <sub>3</sub> PO <sub>4</sub> <sup>+2</sup> | 1042.0502 <sup>+2</sup> | b <sub>24</sub> -H <sub>3</sub> PO <sub>4</sub> <sup>+2</sup> | 1258.1612 <sup>+2</sup> | MH-H <sub>3</sub> PO <sub>4</sub> <sup>+2</sup>               | 1933.9267               | y <sub>19</sub>                                 | 2515.3151 | MH-H <sub>3</sub> PO <sub>4</sub>               |
| 814.4312 <sup>+2</sup> | b <sub>19</sub> -H <sub>3</sub> PO <sub>4</sub> <sup>+2</sup> | 1044.5041 <sup>+2</sup> | y <sub>21</sub> <sup>+2</sup>                                 | 1284.5984               | b <sub>15</sub>                                               | 1990.024                | y <sub>21</sub> -H <sub>3</sub> PO <sub>4</sub> | 2613.292  | MH                                              |



MS/MS Fragmentation of tLPFTTGLIYDsVMLK  
 Found in IPI00386808, HDAC7A protein

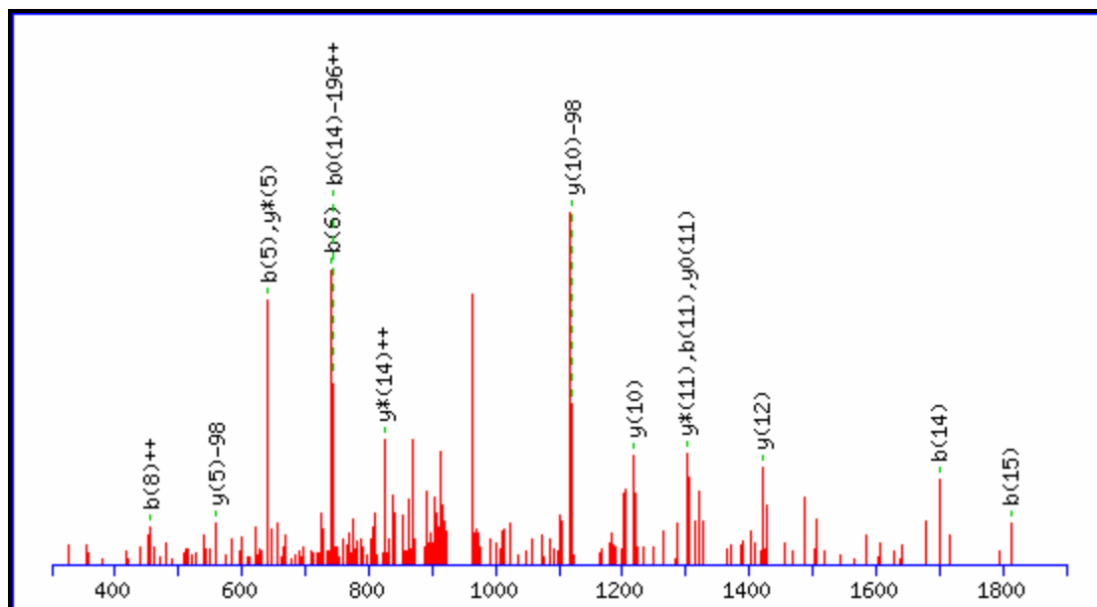

|                        |                                                              |                        |                                                               |                        |                                                               |           |                                                  |           |                                                  |
|------------------------|--------------------------------------------------------------|------------------------|---------------------------------------------------------------|------------------------|---------------------------------------------------------------|-----------|--------------------------------------------------|-----------|--------------------------------------------------|
| 74.0600 <sup>+2</sup>  | y <sub>1</sub> <sup>+2</sup>                                 | 475.7544 <sup>+2</sup> | y <sub>8</sub> -H <sub>3</sub> PO <sub>4</sub> <sup>+2</sup>  | 710.8433 <sup>+2</sup> | y <sub>12</sub> <sup>+2</sup>                                 | 1024.5115 | b <sub>9</sub>                                   | 1469.7709 | y <sub>13</sub> -H <sub>3</sub> PO <sub>4</sub>  |
| 130.6021 <sup>+2</sup> | y <sub>2</sub> <sup>+2</sup>                                 | 490.3058               | y <sub>4</sub>                                                | 735.3891 <sup>+2</sup> | y <sub>13</sub> -H <sub>3</sub> PO <sub>4</sub> <sup>+2</sup> | 1048.4785 | y <sub>8</sub>                                   | 1470.6916 | b <sub>13</sub> -H <sub>3</sub> PO <sub>4</sub>  |
| 147.1128               | y <sub>1</sub>                                               | 524.7429 <sup>+2</sup> | y <sub>8</sub> <sup>+2</sup>                                  | 741.3219               | b <sub>6</sub>                                                | 1063.5856 | y <sub>9</sub> -H <sub>3</sub> PO <sub>4</sub>   | 1503.7552 | b <sub>14</sub> -2H <sub>3</sub> PO <sub>4</sub> |
| 196.1223 <sup>+2</sup> | y <sub>3</sub> <sup>+2</sup>                                 | 532.2965 <sup>+2</sup> | y <sub>9</sub> -H <sub>3</sub> PO <sub>4</sub> <sup>+2</sup>  | 772.3311               | y <sub>6</sub>                                                | 1089.5979 | b <sub>10</sub> -H <sub>3</sub> PO <sub>4</sub>  | 1566.8236 | y <sub>14</sub> -H <sub>3</sub> PO <sub>4</sub>  |
| 197.1285               | b <sub>2</sub> -H <sub>3</sub> PO <sub>4</sub>               | 539.2265               | b <sub>4</sub>                                                | 783.9155 <sup>+2</sup> | y <sub>14</sub> -H <sub>3</sub> PO <sub>4</sub> <sup>+2</sup> | 1120.6071 | y <sub>10</sub> -H <sub>3</sub> PO <sub>4</sub>  | 1567.7478 | y <sub>13</sub>                                  |
| 245.6565 <sup>+2</sup> | y <sub>4</sub> <sup>+2</sup>                                 | 542.2973               | b <sub>5</sub> -H <sub>3</sub> PO <sub>4</sub>                | 784.3775 <sup>+2</sup> | y <sub>13</sub> <sup>+2</sup>                                 | 1161.5625 | y <sub>9</sub>                                   | 1568.6685 | b <sub>13</sub>                                  |
| 260.1969               | y <sub>2</sub>                                               | 559.3272               | y <sub>5</sub> -H <sub>3</sub> PO <sub>4</sub>                | 798.3433               | b <sub>7</sub>                                                | 1187.5748 | b <sub>10</sub>                                  | 1601.7321 | b <sub>14</sub> -H <sub>3</sub> PO <sub>4</sub>  |
| 280.1673 <sup>+2</sup> | y <sub>5</sub> -H <sub>3</sub> PO <sub>4</sub> <sup>+2</sup> | 560.8072 <sup>+2</sup> | y <sub>10</sub> -H <sub>3</sub> PO <sub>4</sub> <sup>+2</sup> | 813.4505               | b <sub>8</sub> -H <sub>3</sub> PO <sub>4</sub>                | 1204.6249 | b <sub>11</sub> -H <sub>3</sub> PO <sub>4</sub>  | 1616.8393 | b <sub>15</sub> -2H <sub>3</sub> PO <sub>4</sub> |
| 294.1812               | b <sub>3</sub> -H <sub>3</sub> PO <sub>4</sub>               | 581.2849 <sup>+2</sup> | y <sub>9</sub> <sup>+2</sup>                                  | 832.9039 <sup>+2</sup> | y <sub>14</sub> <sup>+2</sup>                                 | 1218.584  | y <sub>10</sub>                                  | 1664.8005 | y <sub>14</sub>                                  |
| 295.1053               | b <sub>2</sub>                                               | 609.7956 <sup>+2</sup> | y <sub>10</sub> <sup>+2</sup>                                 | 837.4175               | y <sub>7</sub> -H <sub>3</sub> PO <sub>4</sub>                | 1221.6548 | y <sub>11</sub> -H <sub>3</sub> PO <sub>4</sub>  | 1679.9077 | y <sub>15</sub> -H <sub>3</sub> PO <sub>4</sub>  |
| 329.1557 <sup>+2</sup> | y <sub>5</sub> <sup>+2</sup>                                 | 611.3310 <sup>+2</sup> | y <sub>11</sub> -H <sub>3</sub> PO <sub>4</sub> <sup>+2</sup> | 840.4575 <sup>+2</sup> | y <sub>15</sub> -H <sub>3</sub> PO <sub>4</sub> <sup>+2</sup> | 1273.6463 | b <sub>12</sub> -2H <sub>3</sub> PO <sub>4</sub> | 1699.709  | b <sub>14</sub>                                  |
| 337.6807 <sup>+2</sup> | y <sub>6</sub> -H <sub>3</sub> PO <sub>4</sub> <sup>+2</sup> | 640.2742               | b <sub>5</sub>                                                | 889.4459 <sup>+2</sup> | y <sub>15</sub> <sup>+2</sup>                                 | 1302.6017 | b <sub>11</sub>                                  | 1714.8162 | b <sub>15</sub> -H <sub>3</sub> PO <sub>4</sub>  |
| 386.6692 <sup>+2</sup> | y <sub>6</sub> <sup>+2</sup>                                 | 643.345                | b <sub>6</sub> -H <sub>3</sub> PO <sub>4</sub>                | 911.4274               | b <sub>8</sub>                                                | 1319.6317 | y <sub>11</sub>                                  | 1777.8846 | y <sub>15</sub>                                  |
| 391.2374               | y <sub>3</sub>                                               | 657.3041               | y <sub>5</sub>                                                | 926.5346               | b <sub>9</sub> -H <sub>3</sub> PO <sub>4</sub>                | 1322.7025 | y <sub>12</sub> -H <sub>3</sub> PO <sub>4</sub>  | 1812.7931 | b <sub>15</sub>                                  |
| 392.1581               | b <sub>3</sub>                                               | 660.3195 <sup>+2</sup> | y <sub>11</sub> <sup>+2</sup>                                 | 930.9645 <sup>+2</sup> | MH-H <sub>3</sub> PO <sub>4</sub> <sup>+2</sup>               | 1371.6232 | b <sub>12</sub> -H <sub>3</sub> PO <sub>4</sub>  | 1860.9217 | MH-H <sub>3</sub> PO <sub>4</sub>                |
| 419.2124 <sup>+2</sup> | y <sub>7</sub> -H <sub>3</sub> PO <sub>4</sub> <sup>+2</sup> | 661.8549 <sup>+2</sup> | y <sub>12</sub> -H <sub>3</sub> PO <sub>4</sub> <sup>+2</sup> | 935.3944               | y <sub>7</sub>                                                | 1372.7147 | b <sub>13</sub> -2H <sub>3</sub> PO <sub>4</sub> | 1958.8986 | MH                                               |
| 441.2496               | b <sub>4</sub> -H <sub>3</sub> PO <sub>4</sub>               | 674.3542               | y <sub>6</sub> -H <sub>3</sub> PO <sub>4</sub>                | 950.5016               | y <sub>8</sub> -H <sub>3</sub> PO <sub>4</sub>                | 1420.6793 | y <sub>12</sub>                                  |           |                                                  |
| 468.2008 <sup>+2</sup> | y <sub>7</sub> <sup>+2</sup>                                 | 700.3665               | b <sub>7</sub> -H <sub>3</sub> PO <sub>4</sub>                | 979.9529 <sup>+2</sup> | MH <sup>+2</sup>                                              | 1469.6001 | b <sub>12</sub>                                  |           |                                                  |

MS/MS Fragmentation of AQSPAAPASLSAPEPASQAR  
 Found in IPI00386808, HDAC7A protein

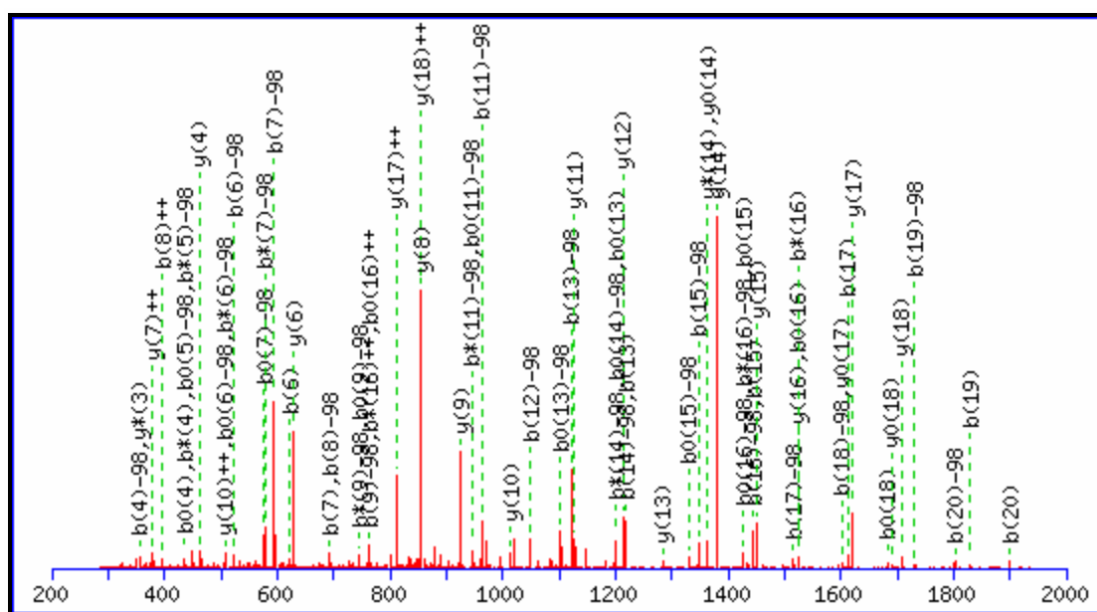

|                        |                                                |                        |                                                |                         |                                                               |                         |                                                 |           |                                                 |
|------------------------|------------------------------------------------|------------------------|------------------------------------------------|-------------------------|---------------------------------------------------------------|-------------------------|-------------------------------------------------|-----------|-------------------------------------------------|
| 88.0631 <sup>+2</sup>  | y <sub>1</sub> <sup>+2</sup>                   | 461.2467               | y <sub>4</sub>                                 | 762.3943 <sup>+2</sup>  | y <sub>16</sub> <sup>+2</sup>                                 | 1037.4837 <sup>+2</sup> | MH <sup>+2</sup>                                | 1523.7812 | y <sub>16</sub>                                 |
| 123.5817 <sup>+2</sup> | y <sub>2</sub> <sup>+2</sup>                   | 463.7381 <sup>+2</sup> | y <sub>9</sub> <sup>+2</sup>                   | 763.3733                | b <sub>9</sub> -H <sub>3</sub> PO <sub>4</sub>                | 1050.5214               | b <sub>12</sub> -H <sub>3</sub> PO <sub>4</sub> | 1542.6836 | b <sub>16</sub>                                 |
| 175.119                | y <sub>1</sub>                                 | 507.2542 <sup>+2</sup> | y <sub>10</sub> <sup>+2</sup>                  | 790.3131                | b <sub>8</sub>                                                | 1061.4663               | b <sub>11</sub>                                 | 1602.7758 | b <sub>18</sub> -H <sub>3</sub> PO <sub>4</sub> |
| 187.6110 <sup>+2</sup> | y <sub>3</sub> <sup>+2</sup>                   | 524.2463               | b <sub>6</sub> -H <sub>3</sub> PO <sub>4</sub> | 810.9206 <sup>+2</sup>  | y <sub>17</sub> <sup>+2</sup>                                 | 1121.5586               | b <sub>13</sub> -H <sub>3</sub> PO <sub>4</sub> | 1613.7207 | b <sub>17</sub>                                 |
| 200.103                | b <sub>2</sub>                                 | 532.2838               | y <sub>5</sub>                                 | 850.4054                | b <sub>10</sub> -H <sub>3</sub> PO <sub>4</sub>               | 1126.5851               | y <sub>11</sub>                                 | 1620.834  | y <sub>17</sub>                                 |
| 231.1270 <sup>+2</sup> | y <sub>4</sub> <sup>+2</sup>                   | 551.1861               | b <sub>5</sub>                                 | 854.4367 <sup>+2</sup>  | y <sub>18</sub> <sup>+2</sup>                                 | 1148.4983               | b <sub>12</sub>                                 | 1700.7527 | b <sub>18</sub>                                 |
| 246.1561               | y <sub>2</sub>                                 | 563.7962 <sup>+2</sup> | y <sub>11</sub> <sup>+2</sup>                  | 855.4319                | y <sub>8</sub>                                                | 1213.6171               | y <sub>12</sub>                                 | 1707.866  | y <sub>18</sub>                                 |
| 266.6455 <sup>+2</sup> | y <sub>5</sub> <sup>+2</sup>                   | 595.2835               | b <sub>7</sub> -H <sub>3</sub> PO <sub>4</sub> | 861.3502                | b <sub>9</sub>                                                | 1218.6113               | b <sub>14</sub> -H <sub>3</sub> PO <sub>4</sub> | 1730.8344 | b <sub>19</sub> -H <sub>3</sub> PO <sub>4</sub> |
| 269.1244               | b <sub>3</sub> -H <sub>3</sub> PO <sub>4</sub> | 607.3122 <sup>+2</sup> | y <sub>12</sub> <sup>+2</sup>                  | 888.9474 <sup>+2</sup>  | y <sub>19</sub> -H <sub>3</sub> PO <sub>4</sub> <sup>+2</sup> | 1219.5355               | b <sub>13</sub>                                 | 1776.8875 | y <sub>19</sub> -H <sub>3</sub> PO <sub>4</sub> |
| 315.1719 <sup>+2</sup> | y <sub>6</sub> <sup>+2</sup>                   | 622.2232               | b <sub>6</sub>                                 | 926.469                 | y <sub>9</sub>                                                | 1284.6543               | y <sub>13</sub>                                 | 1801.8715 | b <sub>20</sub> -H <sub>3</sub> PO <sub>4</sub> |
| 356.1565               | b <sub>4</sub> -H <sub>3</sub> PO <sub>4</sub> | 629.3365               | y <sub>6</sub>                                 | 937.9358 <sup>+2</sup>  | y <sub>19</sub> <sup>+2</sup>                                 | 1316.5882               | b <sub>14</sub>                                 | 1828.8113 | b <sub>19</sub>                                 |
| 367.1013               | b <sub>3</sub>                                 | 642.8308 <sup>+2</sup> | y <sub>13</sub> <sup>+2</sup>                  | 948.3823                | b <sub>10</sub>                                               | 1347.6539               | b <sub>15</sub> -H <sub>3</sub> PO <sub>4</sub> | 1874.8644 | y <sub>19</sub>                                 |
| 374.2146               | y <sub>3</sub>                                 | 691.3571 <sup>+2</sup> | y <sub>14</sub> <sup>+2</sup>                  | 952.9767 <sup>+2</sup>  | y <sub>20</sub> -H <sub>3</sub> PO <sub>4</sub> <sup>+2</sup> | 1381.707                | y <sub>14</sub>                                 | 1899.8484 | b <sub>20</sub>                                 |
| 379.6932 <sup>+2</sup> | y <sub>7</sub> <sup>+2</sup>                   | 692.3362               | b <sub>8</sub> -H <sub>3</sub> PO <sub>4</sub> | 963.4894                | b <sub>11</sub> -H <sub>3</sub> PO <sub>4</sub>               | 1444.7067               | b <sub>16</sub> -H <sub>3</sub> PO <sub>4</sub> | 1904.9461 | y <sub>20</sub> -H <sub>3</sub> PO <sub>4</sub> |
| 428.2196 <sup>+2</sup> | y <sub>8</sub> <sup>+2</sup>                   | 693.2603               | b <sub>7</sub>                                 | 988.4952 <sup>+2</sup>  | MH-H <sub>3</sub> PO <sub>4</sub> <sup>+2</sup>               | 1445.6308               | b <sub>15</sub>                                 | 1975.9832 | MH-H <sub>3</sub> PO <sub>4</sub>               |
| 453.2092               | b <sub>5</sub> -H <sub>3</sub> PO <sub>4</sub> | 726.8757 <sup>+2</sup> | y <sub>15</sub> <sup>+2</sup>                  | 1001.9651 <sup>+2</sup> | y <sub>20</sub> <sup>+2</sup>                                 | 1452.7441               | y <sub>15</sub>                                 | 2002.923  | y <sub>20</sub>                                 |
| 454.1334               | b <sub>4</sub>                                 | 758.3791               | y <sub>7</sub>                                 | 1013.501                | y <sub>10</sub>                                               | 1515.7438               | b <sub>17</sub> -H <sub>3</sub> PO <sub>4</sub> | 2073.9601 | MH                                              |

MS/MS Fragmentation of QIPsAEDLETDGGGPGQVVDDGLEHR  
 Found in IPI00386808, HDAC7A protein

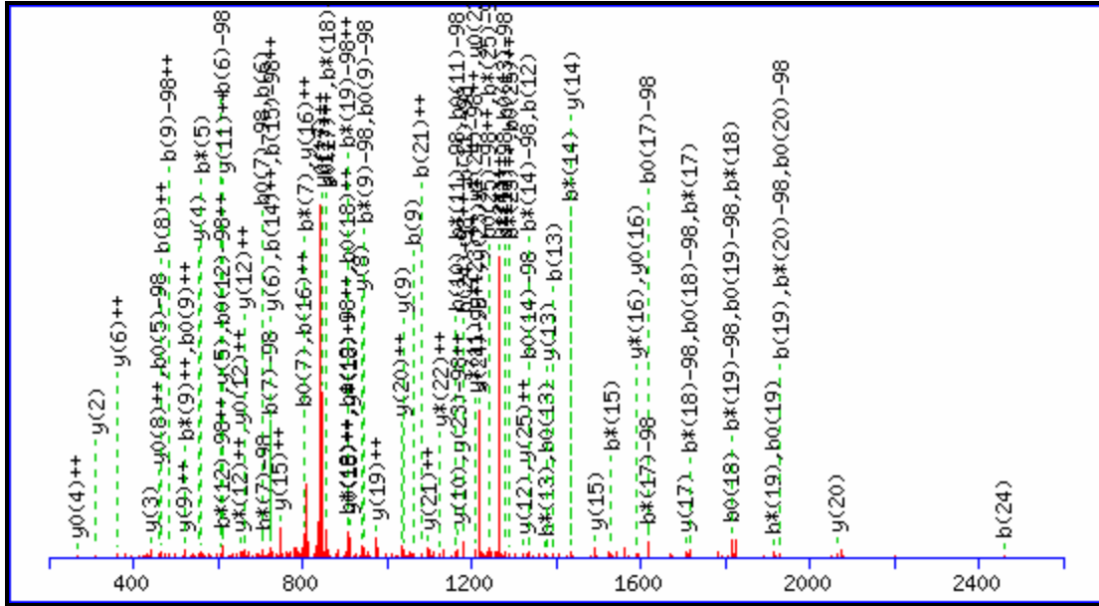

|                        |                                                |                         |                                                 |                         |                                                               |                         |                                                 |           |                                                 |
|------------------------|------------------------------------------------|-------------------------|-------------------------------------------------|-------------------------|---------------------------------------------------------------|-------------------------|-------------------------------------------------|-----------|-------------------------------------------------|
| 88.0631 <sup>+2</sup>  | y <sub>1</sub> <sup>+2</sup>                   | 612.8020 <sup>+2</sup>  | y <sub>11</sub> <sup>+2</sup>                   | 1097.9960 <sup>+2</sup> | y <sub>21</sub> <sup>+2</sup>                                 | 1386.1114 <sup>+2</sup> | MH <sup>+2</sup>                                | 2065.9421 | y <sub>20</sub>                                 |
| 156.5926 <sup>+2</sup> | y <sub>2</sub> <sup>+2</sup>                   | 661.3284 <sup>+2</sup>  | y <sub>12</sub> <sup>+2</sup>                   | 1133.5145 <sup>+2</sup> | y <sub>22</sub> <sup>+2</sup>                                 | 1393.5519               | b <sub>13</sub>                                 | 2119.9414 | b <sub>22</sub> -H <sub>3</sub> PO <sub>4</sub> |
| 175.119                | y <sub>1</sub>                                 | 689.8391 <sup>+2</sup>  | y <sub>13</sub> <sup>+2</sup>                   | 1164.482                | b <sub>10</sub>                                               | 1435.6924               | y <sub>14</sub>                                 | 2160.8969 | b <sub>21</sub>                                 |
| 221.1139 <sup>+2</sup> | y <sub>3</sub> <sup>+2</sup>                   | 706.2807                | b <sub>6</sub>                                  | 1167.5753               | y <sub>10</sub>                                               | 1449.6492               | b <sub>15</sub> -H <sub>3</sub> PO <sub>4</sub> | 2194.9847 | y <sub>21</sub>                                 |
| 242.1499               | b <sub>2</sub>                                 | 718.3499 <sup>+2</sup>  | y <sub>14</sub> <sup>+2</sup>                   | 1168.0253 <sup>+2</sup> | y <sub>23</sub> -H <sub>3</sub> PO <sub>4</sub> <sup>+2</sup> | 1450.5734               | b <sub>14</sub>                                 | 2217.9183 | b <sub>22</sub>                                 |
| 277.6559 <sup>+2</sup> | y <sub>4</sub> <sup>+2</sup>                   | 723.3308                | b <sub>7</sub> -H <sub>3</sub> PO <sub>4</sub>  | 1181.5321               | b <sub>11</sub> -H <sub>3</sub> PO <sub>4</sub>               | 1492.7139               | y <sub>15</sub>                                 | 2233.0255 | b <sub>23</sub> -H <sub>3</sub> PO <sub>4</sub> |
| 306.1666 <sup>+2</sup> | y <sub>5</sub> <sup>+2</sup>                   | 726.3529                | y <sub>6</sub>                                  | 1216.5517 <sup>+2</sup> | y <sub>24</sub> -H <sub>3</sub> PO <sub>4</sub> <sup>+2</sup> | 1506.6707               | b <sub>16</sub> -H <sub>3</sub> PO <sub>4</sub> | 2266.0218 | y <sub>22</sub>                                 |
| 312.1779               | y <sub>2</sub>                                 | 746.8606 <sup>+2</sup>  | y <sub>15</sub> <sup>+2</sup>                   | 1217.0137 <sup>+2</sup> | y <sub>23</sub> <sup>+2</sup>                                 | 1547.6261               | b <sub>15</sub>                                 | 2331.0024 | b <sub>23</sub>                                 |
| 339.2027               | b <sub>3</sub>                                 | 804.3741 <sup>+2</sup>  | y <sub>16</sub> <sup>+2</sup>                   | 1224.5967               | y <sub>11</sub>                                               | 1604.6476               | b <sub>16</sub>                                 | 2335.0433 | y <sub>23</sub> -H <sub>3</sub> PO <sub>4</sub> |
| 363.6801 <sup>+2</sup> | y <sub>6</sub> <sup>+2</sup>                   | 821.3077                | b <sub>7</sub>                                  | 1238.5535               | b <sub>12</sub> -H <sub>3</sub> PO <sub>4</sub>               | 1607.7408               | y <sub>16</sub>                                 | 2362.0681 | b <sub>24</sub> -H <sub>3</sub> PO <sub>4</sub> |
| 408.2241               | b <sub>4</sub> -H <sub>3</sub> PO <sub>4</sub> | 836.4149                | b <sub>8</sub> -H <sub>3</sub> PO <sub>4</sub>  | 1250.0671 <sup>+2</sup> | b <sub>25</sub> -H <sub>3</sub> PO <sub>4</sub> <sup>+2</sup> | 1634.7293               | b <sub>17</sub> -H <sub>3</sub> PO <sub>4</sub> | 2432.0961 | y <sub>24</sub> -H <sub>3</sub> PO <sub>4</sub> |
| 421.1936 <sup>+2</sup> | y <sub>7</sub> <sup>+2</sup>                   | 841.3799                | y <sub>7</sub>                                  | 1265.5401 <sup>+2</sup> | y <sub>24</sub> <sup>+2</sup>                                 | 1708.7885               | y <sub>17</sub>                                 | 2433.0202 | y <sub>23</sub>                                 |
| 441.2205               | y <sub>3</sub>                                 | 854.8979 <sup>+2</sup>  | y <sub>17</sub> <sup>+2</sup>                   | 1273.0937 <sup>+2</sup> | y <sub>25</sub> -H <sub>3</sub> PO <sub>4</sub> <sup>+2</sup> | 1732.7062               | b <sub>17</sub>                                 | 2460.045  | b <sub>24</sub>                                 |
| 470.7278 <sup>+2</sup> | y <sub>8</sub> <sup>+2</sup>                   | 919.4192 <sup>+2</sup>  | y <sub>18</sub> <sup>+2</sup>                   | 1279.509                | b <sub>11</sub>                                               | 1733.7977               | b <sub>18</sub> -H <sub>3</sub> PO <sub>4</sub> | 2499.127  | b <sub>25</sub> -H <sub>3</sub> PO <sub>4</sub> |
| 479.2613               | b <sub>5</sub> -H <sub>3</sub> PO <sub>4</sub> | 934.3918                | b <sub>8</sub>                                  | 1295.575                | b <sub>13</sub> -H <sub>3</sub> PO <sub>4</sub>               | 1831.7746               | b <sub>18</sub>                                 | 2530.0729 | y <sub>24</sub>                                 |
| 506.201                | b <sub>4</sub>                                 | 940.4483                | y <sub>8</sub>                                  | 1299.0556 <sup>+2</sup> | b <sub>25</sub> <sup>+2</sup>                                 | 1832.8661               | b <sub>19</sub> -H <sub>3</sub> PO <sub>4</sub> | 2545.1801 | y <sub>25</sub> -H <sub>3</sub> PO <sub>4</sub> |
| 520.2620 <sup>+2</sup> | y <sub>9</sub> <sup>+2</sup>                   | 965.4575                | b <sub>9</sub> -H <sub>3</sub> PO <sub>4</sub>  | 1321.6495               | y <sub>12</sub>                                               | 1837.8311               | y <sub>18</sub>                                 | 2597.1039 | b <sub>25</sub>                                 |
| 554.3045               | y <sub>4</sub>                                 | 975.9612 <sup>+2</sup>  | y <sub>19</sub> <sup>+2</sup>                   | 1322.0821 <sup>+2</sup> | y <sub>25</sub> <sup>+2</sup>                                 | 1930.843                | b <sub>19</sub>                                 | 2643.157  | y <sub>25</sub>                                 |
| 577.2382               | b <sub>5</sub>                                 | 1033.4747 <sup>+2</sup> | y <sub>20</sub> <sup>+2</sup>                   | 1336.5304               | b <sub>12</sub>                                               | 1947.893                | b <sub>20</sub> -H <sub>3</sub> PO <sub>4</sub> | 2673.2387 | MH-H <sub>3</sub> PO <sub>4</sub>               |
| 584.2913 <sup>+2</sup> | y <sub>10</sub> <sup>+2</sup>                  | 1039.5167               | y <sub>9</sub>                                  | 1337.1230 <sup>+2</sup> | MH-H <sub>3</sub> PO <sub>4</sub> <sup>+2</sup>               | 1950.9152               | y <sub>19</sub>                                 | 2771.2156 | MH                                              |
| 608.3039               | b <sub>6</sub> -H <sub>3</sub> PO <sub>4</sub> | 1063.4343               | b <sub>9</sub>                                  | 1352.5965               | b <sub>14</sub> -H <sub>3</sub> PO <sub>4</sub>               | 2045.8699               | b <sub>20</sub>                                 |           |                                                 |
| 611.326                | y <sub>5</sub>                                 | 1066.5051               | b <sub>10</sub> -H <sub>3</sub> PO <sub>4</sub> | 1378.671                | y <sub>13</sub>                                               | 2062.92                 | b <sub>21</sub> -H <sub>3</sub> PO <sub>4</sub> |           |                                                 |

MS/MS Fragmentation of TRsEPLPPSATAPPPGPmQPR  
 Found in IPI00386808, HDAC7A protein

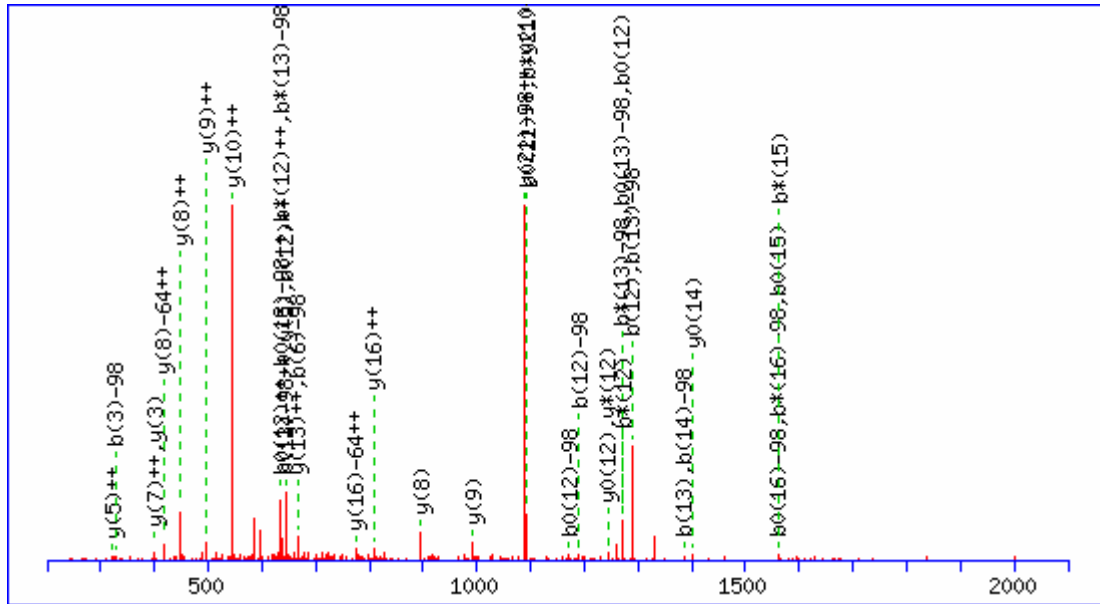

|                        |                                                              |                        |                                                               |                         |                                                               |                         |                                                               |           |                                                 |
|------------------------|--------------------------------------------------------------|------------------------|---------------------------------------------------------------|-------------------------|---------------------------------------------------------------|-------------------------|---------------------------------------------------------------|-----------|-------------------------------------------------|
| 88.0631 <sup>+2</sup>  | y <sub>1</sub> <sup>+2</sup>                                 | 456.2201               | b <sub>4</sub> -H <sub>3</sub> PO <sub>4</sub>                | 741.3910 <sup>+2</sup>  | b <sub>15</sub> -H <sub>3</sub> PO <sub>4</sub> <sup>+2</sup> | 1011.5093 <sup>+2</sup> | y <sub>20</sub> -H <sub>3</sub> PO <sub>4</sub> <sup>+2</sup> | 1516.7577 | y <sub>15</sub>                                 |
| 129.5817 <sup>+2</sup> | b <sub>2</sub> <sup>+2</sup>                                 | 474.2509 <sup>+2</sup> | b <sub>9</sub> -H <sub>3</sub> PO <sub>4</sub> <sup>+2</sup>  | 741.8531 <sup>+2</sup>  | b <sub>14</sub> <sup>+2</sup>                                 | 1018.5316               | b <sub>10</sub> -H <sub>3</sub> PO <sub>4</sub>               | 1578.8275 | b <sub>16</sub> -H <sub>3</sub> PO <sub>4</sub> |
| 136.5895 <sup>+2</sup> | y <sub>2</sub> <sup>+2</sup>                                 | 479.7233 <sup>+2</sup> | b <sub>8</sub> <sup>+2</sup>                                  | 758.8825 <sup>+2</sup>  | y <sub>15</sub> <sup>+2</sup>                                 | 1045.4714               | b <sub>9</sub>                                                | 1579.7516 | b <sub>15</sub>                                 |
| 164.0924 <sup>+2</sup> | b <sub>3</sub> -H <sub>3</sub> PO <sub>4</sub> <sup>+2</sup> | 496.7527 <sup>+2</sup> | y <sub>9</sub> <sup>+2</sup>                                  | 763.4097                | b <sub>7</sub> -H <sub>3</sub> PO <sub>4</sub>                | 1053.0279 <sup>+2</sup> | b <sub>21</sub> -H <sub>3</sub> PO <sub>4</sub> <sup>+2</sup> | 1613.8104 | y <sub>16</sub>                                 |
| 175.119                | y <sub>1</sub>                                               | 509.7694 <sup>+2</sup> | b <sub>10</sub> -H <sub>3</sub> PO <sub>4</sub> <sup>+2</sup> | 764.3338                | b <sub>6</sub>                                                | 1053.4899 <sup>+2</sup> | b <sub>20</sub> <sup>+2</sup>                                 | 1635.8489 | b <sub>17</sub> -H <sub>3</sub> PO <sub>4</sub> |
| 200.6188 <sup>+2</sup> | y <sub>3</sub> <sup>+2</sup>                                 | 523.2393 <sup>+2</sup> | b <sub>9</sub> <sup>+2</sup>                                  | 789.9174 <sup>+2</sup>  | b <sub>16</sub> -H <sub>3</sub> PO <sub>4</sub> <sup>+2</sup> | 1060.4977 <sup>+2</sup> | y <sub>20</sub> <sup>+2</sup>                                 | 1676.8044 | b <sub>16</sub>                                 |
| 213.0809 <sup>+2</sup> | b <sub>3</sub> <sup>+2</sup>                                 | 545.2791 <sup>+2</sup> | y <sub>10</sub> <sup>+2</sup>                                 | 790.3794 <sup>+2</sup>  | b <sub>15</sub> <sup>+2</sup>                                 | 1089.551                | y <sub>10</sub>                                               | 1726.8945 | y <sub>17</sub>                                 |
| 228.6137 <sup>+2</sup> | b <sub>4</sub> -H <sub>3</sub> PO <sub>4</sub> <sup>+2</sup> | 547.2657               | y <sub>4</sub>                                                | 798.3927                | y <sub>7</sub>                                                | 1089.5599 <sup>+2</sup> | y <sub>21</sub> -H <sub>3</sub> PO <sub>4</sub> <sup>+2</sup> | 1732.9017 | b <sub>18</sub> -H <sub>3</sub> PO <sub>4</sub> |
| 258.1561               | b <sub>2</sub>                                               | 553.2729               | b <sub>5</sub> -H <sub>3</sub> PO <sub>4</sub>                | 807.4089 <sup>+2</sup>  | y <sub>16</sub> <sup>+2</sup>                                 | 1102.0163 <sup>+2</sup> | b <sub>21</sub> <sup>+2</sup>                                 | 1733.8258 | b <sub>17</sub>                                 |
| 272.1717               | y <sub>2</sub>                                               | 554.197                | b <sub>4</sub>                                                | 818.4281 <sup>+2</sup>  | b <sub>17</sub> -H <sub>3</sub> PO <sub>4</sub> <sup>+2</sup> | 1116.5085               | b <sub>10</sub>                                               | 1823.9473 | y <sub>18</sub>                                 |
| 274.1365 <sup>+2</sup> | y <sub>4</sub> <sup>+2</sup>                                 | 558.7579 <sup>+2</sup> | b <sub>10</sub> <sup>+2</sup>                                 | 838.9058 <sup>+2</sup>  | b <sub>16</sub> <sup>+2</sup>                                 | 1119.5793               | b <sub>11</sub> -H <sub>3</sub> PO <sub>4</sub>               | 1830.8786 | b <sub>18</sub>                                 |
| 277.1401 <sup>+2</sup> | b <sub>5</sub> -H <sub>3</sub> PO <sub>4</sub> <sup>+2</sup> | 560.2933 <sup>+2</sup> | b <sub>11</sub> -H <sub>3</sub> PO <sub>4</sub> <sup>+2</sup> | 860.4625                | b <sub>8</sub> -H <sub>3</sub> PO <sub>4</sub>                | 1138.5483 <sup>+2</sup> | y <sub>21</sub> <sup>+2</sup>                                 | 1879.9371 | b <sub>19</sub> -H <sub>3</sub> PO <sub>4</sub> |
| 277.6021 <sup>+2</sup> | b <sub>4</sub> <sup>+2</sup>                                 | 580.7977 <sup>+2</sup> | y <sub>11</sub> <sup>+2</sup>                                 | 861.3866                | b <sub>7</sub>                                                | 1140.0837 <sup>+2</sup> | MH-H <sub>3</sub> PO <sub>4</sub> <sup>+2</sup>               | 1952.9899 | y <sub>19</sub>                                 |
| 322.6629 <sup>+2</sup> | y <sub>5</sub> <sup>+2</sup>                                 | 595.8118 <sup>+2</sup> | b <sub>12</sub> -H <sub>3</sub> PO <sub>4</sub> <sup>+2</sup> | 863.9509 <sup>+2</sup>  | y <sub>17</sub> <sup>+2</sup>                                 | 1160.5881               | y <sub>11</sub>                                               | 1977.914  | b <sub>19</sub>                                 |
| 326.1285 <sup>+2</sup> | b <sub>5</sub> <sup>+2</sup>                                 | 609.2817 <sup>+2</sup> | b <sub>11</sub> <sup>+2</sup>                                 | 866.9545 <sup>+2</sup>  | b <sub>18</sub> -H <sub>3</sub> PO <sub>4</sub> <sup>+2</sup> | 1189.0721 <sup>+2</sup> | MH <sup>+2</sup>                                              | 2007.9957 | b <sub>20</sub> -H <sub>3</sub> PO <sub>4</sub> |
| 327.1775               | b <sub>3</sub> -H <sub>3</sub> PO <sub>4</sub>               | 631.3215 <sup>+2</sup> | y <sub>12</sub> <sup>+2</sup>                                 | 867.4166 <sup>+2</sup>  | b <sub>17</sub> <sup>+2</sup>                                 | 1190.6164               | b <sub>12</sub> -H <sub>3</sub> PO <sub>4</sub>               | 2022.0113 | y <sub>20</sub> -H <sub>3</sub> PO <sub>4</sub> |
| 333.6821 <sup>+2</sup> | b <sub>6</sub> -H <sub>3</sub> PO <sub>4</sub> <sup>+2</sup> | 644.3185               | y <sub>5</sub>                                                | 895.4454                | y <sub>8</sub>                                                | 1217.5562               | b <sub>11</sub>                                               | 2105.0484 | b <sub>21</sub> -H <sub>3</sub> PO <sub>4</sub> |
| 351.1736 <sup>+2</sup> | y <sub>6</sub> <sup>+2</sup>                                 | 644.3382 <sup>+2</sup> | b <sub>13</sub> -H <sub>3</sub> PO <sub>4</sub> <sup>+2</sup> | 912.4773 <sup>+2</sup>  | y <sub>18</sub> <sup>+2</sup>                                 | 1261.6358               | y <sub>12</sub>                                               | 2105.9726 | b <sub>20</sub>                                 |
| 382.2085 <sup>+2</sup> | b <sub>7</sub> -H <sub>3</sub> PO <sub>4</sub> <sup>+2</sup> | 644.8003 <sup>+2</sup> | b <sub>12</sub> <sup>+2</sup>                                 | 915.9429 <sup>+2</sup>  | b <sub>18</sub> <sup>+2</sup>                                 | 1287.6692               | b <sub>13</sub> -H <sub>3</sub> PO <sub>4</sub>               | 2119.9882 | y <sub>20</sub>                                 |
| 382.6706 <sup>+2</sup> | b <sub>6</sub> <sup>+2</sup>                                 | 651.2498               | b <sub>5</sub>                                                | 940.4722 <sup>+2</sup>  | b <sub>19</sub> -H <sub>3</sub> PO <sub>4</sub> <sup>+2</sup> | 1288.5933               | b <sub>12</sub>                                               | 2178.1124 | y <sub>21</sub> -H <sub>3</sub> PO <sub>4</sub> |
| 399.7000 <sup>+2</sup> | y <sub>7</sub> <sup>+2</sup>                                 | 666.357                | b <sub>6</sub> -H <sub>3</sub> PO <sub>4</sub>                | 947.4945                | b <sub>9</sub> -H <sub>3</sub> PO <sub>4</sub>                | 1332.6729               | y <sub>13</sub>                                               | 2203.0253 | b <sub>21</sub>                                 |
| 400.2303               | y <sub>3</sub>                                               | 666.8401 <sup>+2</sup> | y <sub>13</sub> <sup>+2</sup>                                 | 958.4394                | b <sub>8</sub>                                                | 1384.7219               | b <sub>14</sub> -H <sub>3</sub> PO <sub>4</sub>               | 2276.0893 | y <sub>21</sub>                                 |
| 425.1544               | b <sub>3</sub>                                               | 692.8646 <sup>+2</sup> | b <sub>14</sub> -H <sub>3</sub> PO <sub>4</sub> <sup>+2</sup> | 976.9986 <sup>+2</sup>  | y <sub>19</sub> <sup>+2</sup>                                 | 1385.6461               | b <sub>13</sub>                                               | 2279.1601 | MH-H <sub>3</sub> PO <sub>4</sub>               |
| 430.7349 <sup>+2</sup> | b <sub>8</sub> -H <sub>3</sub> PO <sub>4</sub> <sup>+2</sup> | 693.3267 <sup>+2</sup> | b <sub>13</sub> <sup>+2</sup>                                 | 989.4606 <sup>+2</sup>  | b <sub>19</sub> <sup>+2</sup>                                 | 1419.7049               | y <sub>14</sub>                                               | 2377.137  | MH                                              |
| 431.1969 <sup>+2</sup> | b <sub>7</sub> <sup>+2</sup>                                 | 701.3399               | y <sub>6</sub>                                                | 992.4982                | y <sub>9</sub>                                                | 1481.7747               | b <sub>15</sub> -H <sub>3</sub> PO <sub>4</sub>               |           |                                                 |
| 448.2264 <sup>+2</sup> | y <sub>8</sub> <sup>+2</sup>                                 | 710.3561 <sup>+2</sup> | y <sub>14</sub> <sup>+2</sup>                                 | 1004.5015 <sup>+2</sup> | b <sub>20</sub> -H <sub>3</sub> PO <sub>4</sub> <sup>+2</sup> | 1482.6988               | b <sub>14</sub>                                               |           |                                                 |

MS/MS Fragmentation of HGLLLPAsPVR  
 Found in IPI00061087, Protein FAM122A

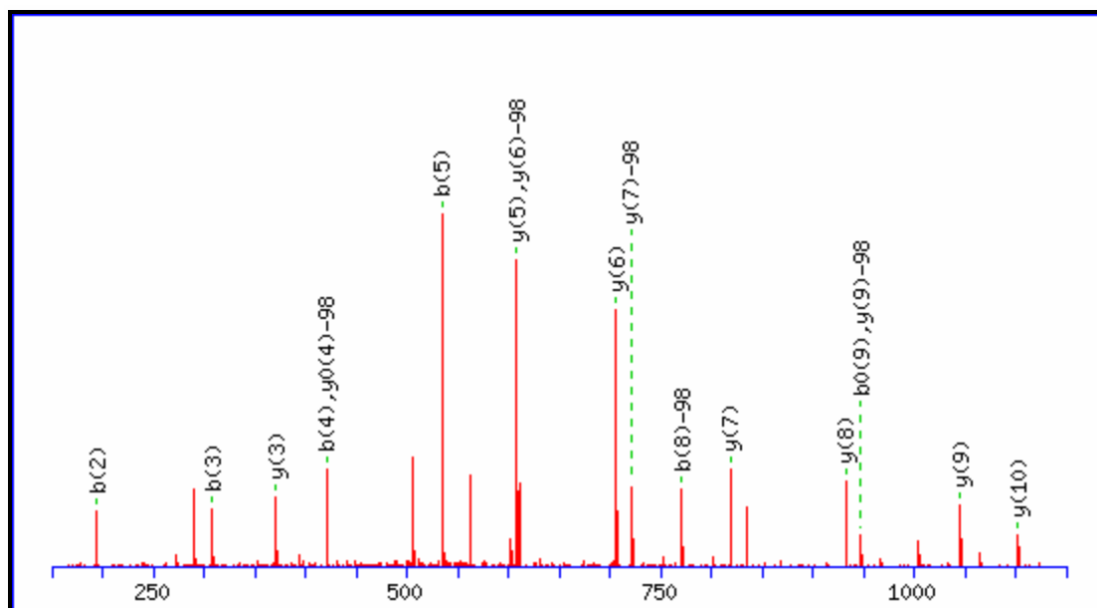

|                        |                                                              |                        |                                                              |                        |                                                               |                        |                                                 |           |                                                 |
|------------------------|--------------------------------------------------------------|------------------------|--------------------------------------------------------------|------------------------|---------------------------------------------------------------|------------------------|-------------------------------------------------|-----------|-------------------------------------------------|
| 88.0631 <sup>+2</sup>  | y <sub>1</sub> <sup>+2</sup>                                 | 304.6794 <sup>+2</sup> | y <sub>6</sub> -H <sub>3</sub> PO <sub>4</sub> <sup>+2</sup> | 435.2177 <sup>+2</sup> | b <sub>8</sub> <sup>+2</sup>                                  | 571.3457 <sup>+2</sup> | MH-H <sub>3</sub> PO <sub>4</sub> <sup>+2</sup> | 932.4965  | y <sub>8</sub>                                  |
| 98.0475 <sup>+2</sup>  | b <sub>2</sub> <sup>+2</sup>                                 | 305.1414 <sup>+2</sup> | y <sub>5</sub> <sup>+2</sup>                                 | 440.2616               | y <sub>4</sub> -H <sub>3</sub> PO <sub>4</sub>                | 608.3515               | y <sub>6</sub> -H <sub>3</sub> PO <sub>4</sub>  | 947.6037  | y <sub>9</sub> -H <sub>3</sub> PO <sub>4</sub>  |
| 137.5973 <sup>+2</sup> | y <sub>2</sub> <sup>+2</sup>                                 | 308.1717               | b <sub>3</sub>                                               | 466.7519 <sup>+2</sup> | y <sub>8</sub> <sup>+2</sup>                                  | 609.2756               | y <sub>5</sub>                                  | 966.4808  | b <sub>9</sub>                                  |
| 154.5895 <sup>+2</sup> | b <sub>3</sub> <sup>+2</sup>                                 | 316.1999 <sup>+2</sup> | b <sub>6</sub> <sup>+2</sup>                                 | 474.3055 <sup>+2</sup> | y <sub>9</sub> -H <sub>3</sub> PO <sub>4</sub> <sup>+2</sup>  | 620.3341 <sup>+2</sup> | MH <sup>+2</sup>                                | 967.5724  | b <sub>10</sub> -H <sub>3</sub> PO <sub>4</sub> |
| 175.119                | y <sub>1</sub>                                               | 351.7185 <sup>+2</sup> | b <sub>7</sub> <sup>+2</sup>                                 | 483.7441 <sup>+2</sup> | b <sub>9</sub> <sup>+2</sup>                                  | 631.3926               | b <sub>6</sub>                                  | 1004.6251 | y <sub>10</sub> -H <sub>3</sub> PO <sub>4</sub> |
| 186.1237 <sup>+2</sup> | y <sub>3</sub> <sup>+2</sup>                                 | 353.6678 <sup>+2</sup> | y <sub>6</sub> <sup>+2</sup>                                 | 484.2898 <sup>+2</sup> | b <sub>10</sub> -H <sub>3</sub> PO <sub>4</sub> <sup>+2</sup> | 702.4297               | b <sub>7</sub>                                  | 1045.5806 | y <sub>9</sub>                                  |
| 195.0877               | b <sub>2</sub>                                               | 361.2214 <sup>+2</sup> | y <sub>7</sub> -H <sub>3</sub> PO <sub>4</sub> <sup>+2</sup> | 502.8162 <sup>+2</sup> | y <sub>10</sub> -H <sub>3</sub> PO <sub>4</sub> <sup>+2</sup> | 706.3284               | y <sub>6</sub>                                  | 1065.5493 | b <sub>10</sub>                                 |
| 211.1315 <sup>+2</sup> | b <sub>4</sub> <sup>+2</sup>                                 | 371.2401               | y <sub>3</sub>                                               | 511.2987               | y <sub>5</sub> -H <sub>3</sub> PO <sub>4</sub>                | 721.4355               | y <sub>7</sub> -H <sub>3</sub> PO <sub>4</sub>  | 1102.602  | y <sub>10</sub>                                 |
| 220.6344 <sup>+2</sup> | y <sub>4</sub> -H <sub>3</sub> PO <sub>4</sub> <sup>+2</sup> | 386.2292 <sup>+2</sup> | b <sub>8</sub> -H <sub>3</sub> PO <sub>4</sub> <sup>+2</sup> | 523.2939 <sup>+2</sup> | y <sub>9</sub> <sup>+2</sup>                                  | 771.4512               | b <sub>8</sub> -H <sub>3</sub> PO <sub>4</sub>  | 1141.684  | MH-H <sub>3</sub> PO <sub>4</sub>               |
| 256.1530 <sup>+2</sup> | y <sub>5</sub> -H <sub>3</sub> PO <sub>4</sub> <sup>+2</sup> | 410.2099 <sup>+2</sup> | y <sub>7</sub> <sup>+2</sup>                                 | 533.2783 <sup>+2</sup> | b <sub>10</sub> <sup>+2</sup>                                 | 819.4124               | y <sub>7</sub>                                  | 1239.6609 | MH                                              |
| 267.6736 <sup>+2</sup> | b <sub>5</sub> <sup>+2</sup>                                 | 417.7634 <sup>+2</sup> | y <sub>8</sub> -H <sub>3</sub> PO <sub>4</sub> <sup>+2</sup> | 534.3398               | b <sub>5</sub>                                                | 834.5196               | y <sub>8</sub> -H <sub>3</sub> PO <sub>4</sub>  |           |                                                 |
| 269.6229 <sup>+2</sup> | y <sub>4</sub> <sup>+2</sup>                                 | 421.2558               | b <sub>4</sub>                                               | 538.2385               | y <sub>4</sub>                                                | 868.5039               | b <sub>9</sub> -H <sub>3</sub> PO <sub>4</sub>  |           |                                                 |
| 274.1874               | y <sub>2</sub>                                               | 434.7556 <sup>+2</sup> | b <sub>9</sub> -H <sub>3</sub> PO <sub>4</sub> <sup>+2</sup> | 551.8046 <sup>+2</sup> | y <sub>10</sub> <sup>+2</sup>                                 | 869.4281               | b <sub>8</sub>                                  |           |                                                 |

MS/MS Fragmentation of RIDFIPVSPAPsPTR  
 Found in IPI00061087, Protein FAM122A

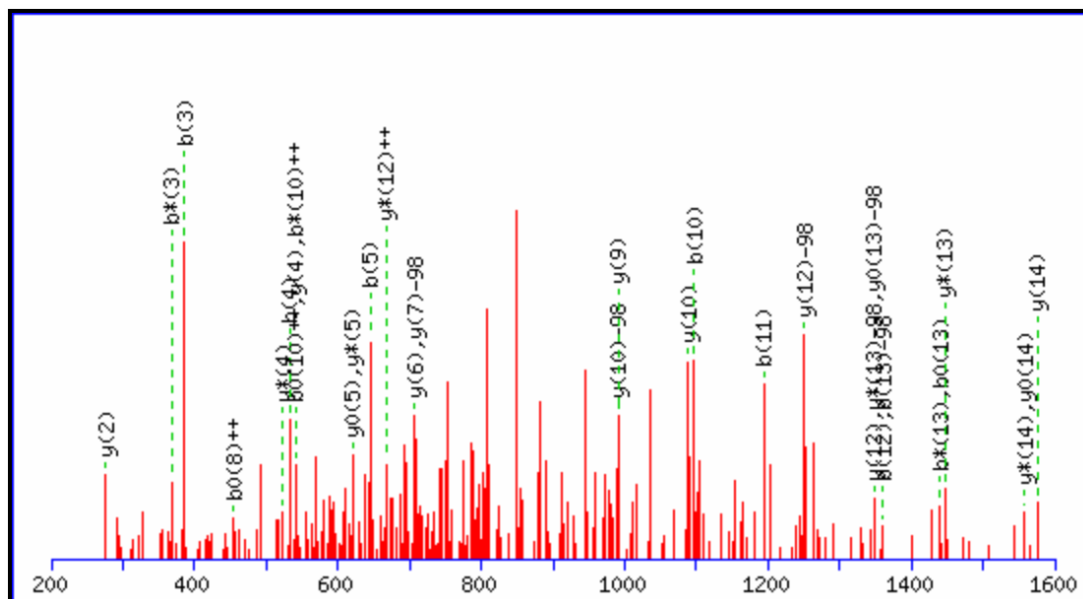

|                        |                                                              |                        |                                                               |                        |                                                               |                        |                                                 |           |                                                 |
|------------------------|--------------------------------------------------------------|------------------------|---------------------------------------------------------------|------------------------|---------------------------------------------------------------|------------------------|-------------------------------------------------|-----------|-------------------------------------------------|
| 88.0631 <sup>+2</sup>  | y <sub>1</sub> <sup>+2</sup>                                 | 373.2194               | y <sub>3</sub>                                                | 597.3375 <sup>+2</sup> | b <sub>11</sub> <sup>+2</sup>                                 | 779.8869 <sup>+2</sup> | b <sub>14</sub> <sup>+2</sup>                   | 1250.6892 | y <sub>12</sub> -H <sub>3</sub> PO <sub>4</sub> |
| 135.5999 <sup>+2</sup> | b <sub>2</sub> <sup>+2</sup>                                 | 385.2194               | b <sub>3</sub>                                                | 601.3025 <sup>+2</sup> | y <sub>11</sub> <sup>+2</sup>                                 | 788.8922 <sup>+2</sup> | y <sub>14</sub> <sup>+2</sup>                   | 1262.6892 | b <sub>12</sub> -H <sub>3</sub> PO <sub>4</sub> |
| 138.5870 <sup>+2</sup> | y <sub>2</sub> <sup>+2</sup>                                 | 397.7114 <sup>+2</sup> | y <sub>8</sub> -H <sub>3</sub> PO <sub>4</sub> <sup>+2</sup>  | 610.3307               | y <sub>6</sub> -H <sub>3</sub> PO <sub>4</sub>                | 794.4155               | y <sub>8</sub> -H <sub>3</sub> PO <sub>4</sub>  | 1348.6661 | y <sub>12</sub>                                 |
| 175.119                | y <sub>1</sub>                                               | 403.1838 <sup>+2</sup> | y <sub>7</sub> <sup>+2</sup>                                  | 625.8482 <sup>+2</sup> | y <sub>12</sub> -H <sub>3</sub> PO <sub>4</sub> <sup>+2</sup> | 805.3604               | y <sub>7</sub>                                  | 1359.7419 | b <sub>13</sub> -H <sub>3</sub> PO <sub>4</sub> |
| 187.1133 <sup>+2</sup> | y <sub>3</sub> <sup>+2</sup>                                 | 421.2502 <sup>+2</sup> | b <sub>7</sub> <sup>+2</sup>                                  | 631.8482 <sup>+2</sup> | b <sub>12</sub> -H <sub>3</sub> PO <sub>4</sub> <sup>+2</sup> | 817.9543 <sup>+2</sup> | MH-H <sub>3</sub> PO <sub>4</sub> <sup>+2</sup> | 1360.6661 | b <sub>12</sub>                                 |
| 193.1133 <sup>+2</sup> | b <sub>3</sub> <sup>+2</sup>                                 | 442.2409               | y <sub>4</sub> -H <sub>3</sub> PO <sub>4</sub>                | 637.2705               | y <sub>5</sub>                                                | 841.4931               | b <sub>7</sub>                                  | 1365.7161 | y <sub>13</sub> -H <sub>3</sub> PO <sub>4</sub> |
| 221.6241 <sup>+2</sup> | y <sub>4</sub> -H <sub>3</sub> PO <sub>4</sub> <sup>+2</sup> | 446.6998 <sup>+2</sup> | y <sub>8</sub> <sup>+2</sup>                                  | 645.3719               | b <sub>5</sub>                                                | 866.9427 <sup>+2</sup> | MH <sup>+2</sup>                                | 1457.7188 | b <sub>13</sub>                                 |
| 266.6475 <sup>+2</sup> | b <sub>4</sub> <sup>+2</sup>                                 | 447.2456 <sup>+2</sup> | y <sub>9</sub> -H <sub>3</sub> PO <sub>4</sub> <sup>+2</sup>  | 674.8367 <sup>+2</sup> | y <sub>12</sub> <sup>+2</sup>                                 | 892.3924               | y <sub>8</sub>                                  | 1460.7896 | b <sub>14</sub> -H <sub>3</sub> PO <sub>4</sub> |
| 270.1504 <sup>+2</sup> | y <sub>5</sub> -H <sub>3</sub> PO <sub>4</sub> <sup>+2</sup> | 464.7662 <sup>+2</sup> | b <sub>8</sub> <sup>+2</sup>                                  | 680.3746 <sup>+2</sup> | b <sub>13</sub> -H <sub>3</sub> PO <sub>4</sub> <sup>+2</sup> | 893.4839               | y <sub>9</sub> -H <sub>3</sub> PO <sub>4</sub>  | 1463.693  | y <sub>13</sub>                                 |
| 270.1925               | b <sub>2</sub>                                               | 495.7720 <sup>+2</sup> | y <sub>10</sub> -H <sub>3</sub> PO <sub>4</sub> <sup>+2</sup> | 680.8367 <sup>+2</sup> | b <sub>12</sub> <sup>+2</sup>                                 | 928.5251               | b <sub>8</sub>                                  | 1478.8002 | y <sub>14</sub> -H <sub>3</sub> PO <sub>4</sub> |
| 270.6125 <sup>+2</sup> | y <sub>4</sub> <sup>+2</sup>                                 | 496.2341 <sup>+2</sup> | y <sub>9</sub> <sup>+2</sup>                                  | 683.3617 <sup>+2</sup> | y <sub>13</sub> -H <sub>3</sub> PO <sub>4</sub> <sup>+2</sup> | 990.5367               | y <sub>10</sub> -H <sub>3</sub> PO <sub>4</sub> | 1558.7665 | b <sub>14</sub>                                 |
| 276.1666               | y <sub>2</sub>                                               | 513.2926 <sup>+2</sup> | b <sub>9</sub> <sup>+2</sup>                                  | 707.3835               | y <sub>7</sub> -H <sub>3</sub> PO <sub>4</sub>                | 991.4608               | y <sub>9</sub>                                  | 1576.7771 | y <sub>14</sub>                                 |
| 305.6690 <sup>+2</sup> | y <sub>6</sub> -H <sub>3</sub> PO <sub>4</sub> <sup>+2</sup> | 532.2878               | b <sub>4</sub>                                                | 708.3076               | y <sub>6</sub>                                                | 1025.5778              | b <sub>9</sub>                                  | 1634.9013 | MH-H <sub>3</sub> PO <sub>4</sub>               |
| 319.1389 <sup>+2</sup> | y <sub>5</sub> <sup>+2</sup>                                 | 539.2936               | y <sub>5</sub> -H <sub>3</sub> PO <sub>4</sub>                | 729.3631 <sup>+2</sup> | b <sub>13</sub> <sup>+2</sup>                                 | 1088.5136              | y <sub>10</sub>                                 | 1732.8782 | MH                                              |
| 323.1896 <sup>+2</sup> | b <sub>5</sub> <sup>+2</sup>                                 | 540.2178               | y <sub>4</sub>                                                | 730.8985 <sup>+2</sup> | b <sub>14</sub> -H <sub>3</sub> PO <sub>4</sub> <sup>+2</sup> | 1096.615               | b <sub>10</sub>                                 |           |                                                 |
| 354.1954 <sup>+2</sup> | y <sub>7</sub> -H <sub>3</sub> PO <sub>4</sub> <sup>+2</sup> | 544.7604 <sup>+2</sup> | y <sub>10</sub> <sup>+2</sup>                                 | 732.3501 <sup>+2</sup> | y <sub>13</sub> <sup>+2</sup>                                 | 1103.6208              | y <sub>11</sub> -H <sub>3</sub> PO <sub>4</sub> |           |                                                 |
| 354.6575 <sup>+2</sup> | y <sub>6</sub> <sup>+2</sup>                                 | 548.8111 <sup>+2</sup> | b <sub>10</sub> <sup>+2</sup>                                 | 739.9037 <sup>+2</sup> | y <sub>14</sub> -H <sub>3</sub> PO <sub>4</sub> <sup>+2</sup> | 1193.6677              | b <sub>11</sub>                                 |           |                                                 |
| 371.7160 <sup>+2</sup> | b <sub>6</sub> <sup>+2</sup>                                 | 552.3140 <sup>+2</sup> | y <sub>11</sub> -H <sub>3</sub> PO <sub>4</sub> <sup>+2</sup> | 742.4246               | b <sub>6</sub>                                                | 1201.5977              | y <sub>11</sub>                                 |           |                                                 |

MS/MS Fragmentation of RIDFIPVsPAPSPT  
 Found in IPI00061087, Protein FAM122A

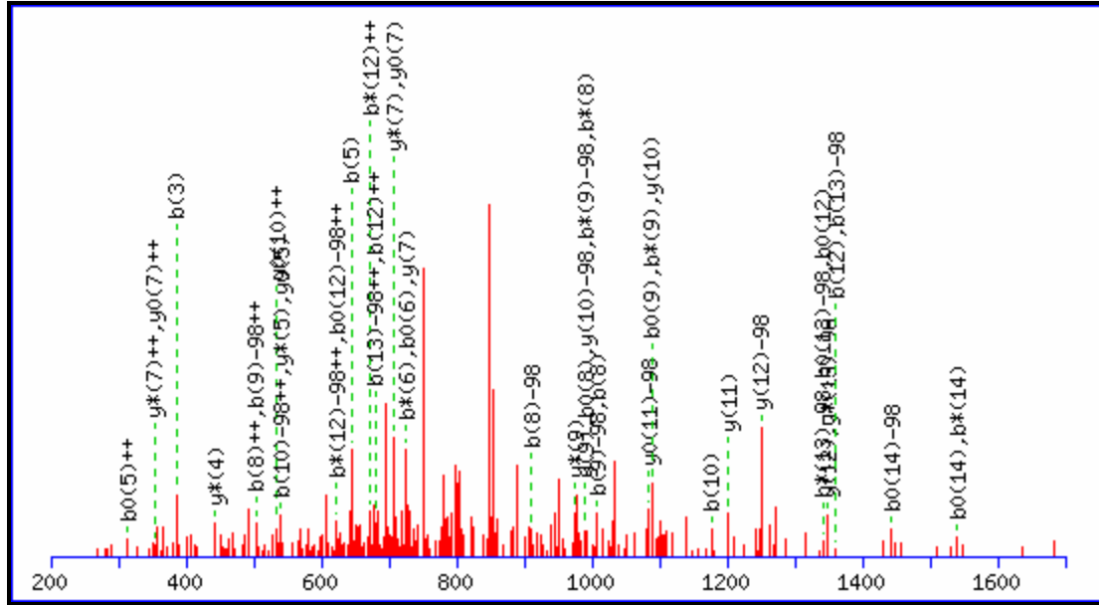

|                        |                                                              |                        |                                                               |                        |                                                               |                        |                                                 |           |                                                 |
|------------------------|--------------------------------------------------------------|------------------------|---------------------------------------------------------------|------------------------|---------------------------------------------------------------|------------------------|-------------------------------------------------|-----------|-------------------------------------------------|
| 88.0631 <sup>+2</sup>  | y <sub>1</sub> <sup>+2</sup>                                 | 421.2502 <sup>+2</sup> | b <sub>7</sub> <sup>+2</sup>                                  | 625.8482 <sup>+2</sup> | y <sub>12</sub> -H <sub>3</sub> PO <sub>4</sub> <sup>+2</sup> | 817.9543 <sup>+2</sup> | MH-H <sub>3</sub> PO <sub>4</sub> <sup>+2</sup> | 1262.6892 | b <sub>12</sub> -H <sub>3</sub> PO <sub>4</sub> |
| 135.5999 <sup>+2</sup> | b <sub>2</sub> <sup>+2</sup>                                 | 446.6998 <sup>+2</sup> | y <sub>8</sub> <sup>+2</sup>                                  | 628.3413               | y <sub>6</sub>                                                | 841.4931               | b <sub>7</sub>                                  | 1273.6341 | b <sub>11</sub>                                 |
| 138.5870 <sup>+2</sup> | y <sub>2</sub> <sup>+2</sup>                                 | 447.2456 <sup>+2</sup> | y <sub>9</sub> -H <sub>3</sub> PO <sub>4</sub> <sup>+2</sup>  | 631.8482 <sup>+2</sup> | b <sub>12</sub> -H <sub>3</sub> PO <sub>4</sub> <sup>+2</sup> | 866.9427 <sup>+2</sup> | MH <sup>+2</sup>                                | 1348.6661 | y <sub>12</sub>                                 |
| 175.119                | y <sub>1</sub>                                               | 455.7609 <sup>+2</sup> | b <sub>8</sub> -H <sub>3</sub> PO <sub>4</sub> <sup>+2</sup>  | 637.3207 <sup>+2</sup> | b <sub>11</sub> <sup>+2</sup>                                 | 892.3924               | y <sub>8</sub>                                  | 1359.7419 | b <sub>13</sub> -H <sub>3</sub> PO <sub>4</sub> |
| 187.1133 <sup>+2</sup> | y <sub>3</sub> <sup>+2</sup>                                 | 460.2514               | y <sub>4</sub>                                                | 645.3719               | b <sub>5</sub>                                                | 893.4839               | y <sub>9</sub> -H <sub>3</sub> PO <sub>4</sub>  | 1360.6661 | b <sub>12</sub>                                 |
| 193.1133 <sup>+2</sup> | b <sub>3</sub> <sup>+2</sup>                                 | 495.7720 <sup>+2</sup> | y <sub>10</sub> -H <sub>3</sub> PO <sub>4</sub> <sup>+2</sup> | 674.8367 <sup>+2</sup> | y <sub>12</sub> <sup>+2</sup>                                 | 910.5145               | b <sub>8</sub> -H <sub>3</sub> PO <sub>4</sub>  | 1365.7161 | y <sub>13</sub> -H <sub>3</sub> PO <sub>4</sub> |
| 230.6293 <sup>+2</sup> | y <sub>4</sub> <sup>+2</sup>                                 | 496.2341 <sup>+2</sup> | y <sub>9</sub> <sup>+2</sup>                                  | 680.3746 <sup>+2</sup> | b <sub>13</sub> -H <sub>3</sub> PO <sub>4</sub> <sup>+2</sup> | 990.5367               | y <sub>10</sub> -H <sub>3</sub> PO <sub>4</sub> | 1457.7188 | b <sub>13</sub>                                 |
| 266.6475 <sup>+2</sup> | b <sub>4</sub> <sup>+2</sup>                                 | 504.2873 <sup>+2</sup> | b <sub>9</sub> -H <sub>3</sub> PO <sub>4</sub> <sup>+2</sup>  | 680.8367 <sup>+2</sup> | b <sub>12</sub> <sup>+2</sup>                                 | 991.4608               | y <sub>9</sub>                                  | 1460.7896 | b <sub>14</sub> -H <sub>3</sub> PO <sub>4</sub> |
| 270.1925               | b <sub>2</sub>                                               | 504.7493 <sup>+2</sup> | b <sub>8</sub> <sup>+2</sup>                                  | 683.3617 <sup>+2</sup> | y <sub>13</sub> -H <sub>3</sub> PO <sub>4</sub> <sup>+2</sup> | 1007.5673              | b <sub>9</sub> -H <sub>3</sub> PO <sub>4</sub>  | 1463.693  | y <sub>13</sub>                                 |
| 276.1666               | y <sub>2</sub>                                               | 532.2878               | b <sub>4</sub>                                                | 725.3941               | y <sub>7</sub>                                                | 1008.4914              | b <sub>8</sub>                                  | 1478.8002 | y <sub>14</sub> -H <sub>3</sub> PO <sub>4</sub> |
| 279.1557 <sup>+2</sup> | y <sub>5</sub> <sup>+2</sup>                                 | 539.8058 <sup>+2</sup> | b <sub>10</sub> -H <sub>3</sub> PO <sub>4</sub> <sup>+2</sup> | 729.3631 <sup>+2</sup> | b <sub>13</sub> <sup>+2</sup>                                 | 1078.6044              | b <sub>10</sub> -H <sub>3</sub> PO <sub>4</sub> | 1558.7665 | b <sub>14</sub>                                 |
| 314.6743 <sup>+2</sup> | y <sub>6</sub> <sup>+2</sup>                                 | 544.7604 <sup>+2</sup> | y <sub>10</sub> <sup>+2</sup>                                 | 730.8985 <sup>+2</sup> | b <sub>14</sub> -H <sub>3</sub> PO <sub>4</sub> <sup>+2</sup> | 1088.5136              | y <sub>10</sub>                                 | 1576.7771 | y <sub>14</sub>                                 |
| 323.1896 <sup>+2</sup> | b <sub>5</sub> <sup>+2</sup>                                 | 552.3140 <sup>+2</sup> | y <sub>11</sub> -H <sub>3</sub> PO <sub>4</sub> <sup>+2</sup> | 732.3501 <sup>+2</sup> | y <sub>13</sub> <sup>+2</sup>                                 | 1103.6208              | y <sub>11</sub> -H <sub>3</sub> PO <sub>4</sub> | 1634.9013 | MH-H <sub>3</sub> PO <sub>4</sub>               |
| 363.2007 <sup>+2</sup> | y <sub>7</sub> <sup>+2</sup>                                 | 553.2757 <sup>+2</sup> | b <sub>9</sub> <sup>+2</sup>                                  | 739.9037 <sup>+2</sup> | y <sub>14</sub> -H <sub>3</sub> PO <sub>4</sub> <sup>+2</sup> | 1105.5442              | b <sub>9</sub>                                  | 1732.8782 | MH                                              |
| 371.7160 <sup>+2</sup> | b <sub>6</sub> <sup>+2</sup>                                 | 557.3042               | y <sub>5</sub>                                                | 742.4246               | b <sub>6</sub>                                                | 1175.6572              | b <sub>11</sub> -H <sub>3</sub> PO <sub>4</sub> |           |                                                 |
| 373.2194               | y <sub>3</sub>                                               | 588.3322 <sup>+2</sup> | b <sub>11</sub> -H <sub>3</sub> PO <sub>4</sub> <sup>+2</sup> | 779.8869 <sup>+2</sup> | b <sub>14</sub> <sup>+2</sup>                                 | 1176.5813              | b <sub>10</sub>                                 |           |                                                 |
| 385.2194               | b <sub>3</sub>                                               | 588.7943 <sup>+2</sup> | b <sub>10</sub> <sup>+2</sup>                                 | 788.8922 <sup>+2</sup> | y <sub>14</sub> <sup>+2</sup>                                 | 1201.5977              | y <sub>11</sub>                                 |           |                                                 |
| 397.7114 <sup>+2</sup> | y <sub>8</sub> -H <sub>3</sub> PO <sub>4</sub> <sup>+2</sup> | 601.3025 <sup>+2</sup> | y <sub>11</sub> <sup>+2</sup>                                 | 794.4155               | y <sub>8</sub> -H <sub>3</sub> PO <sub>4</sub>                | 1250.6892              | y <sub>12</sub> -H <sub>3</sub> PO <sub>4</sub> |           |                                                 |

MS/MS Fragmentation of RIDFIPVsPAPsPTR  
 Found in IPI00061087, Protein FAM122A

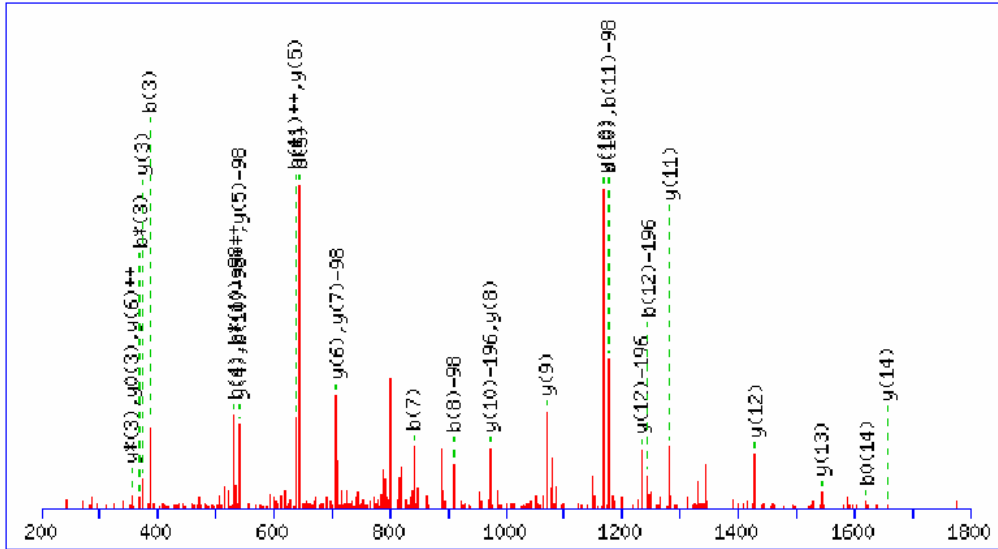

|                        |                                                               |                        |                                                                |                        |                                                                |                        |                                                  |           |                                                  |
|------------------------|---------------------------------------------------------------|------------------------|----------------------------------------------------------------|------------------------|----------------------------------------------------------------|------------------------|--------------------------------------------------|-----------|--------------------------------------------------|
| 88.0631 <sup>+2</sup>  | y <sub>1</sub> <sup>+2</sup>                                  | 437.6946 <sup>+2</sup> | y <sub>8</sub> -H <sub>3</sub> PO <sub>4</sub> <sup>+2</sup>   | 622.8429 <sup>+2</sup> | b <sub>12</sub> -2H <sub>3</sub> PO <sub>4</sub> <sup>+2</sup> | 805.3604               | y <sub>7</sub>                                   | 1232.6786 | y <sub>12</sub> -2H <sub>3</sub> PO <sub>4</sub> |
| 135.5999 <sup>+2</sup> | b <sub>2</sub> <sup>+2</sup>                                  | 438.2403 <sup>+2</sup> | y <sub>9</sub> -2H <sub>3</sub> PO <sub>4</sub> <sup>+2</sup>  | 637.2705               | y <sub>5</sub>                                                 | 819.8701 <sup>+2</sup> | b <sub>14</sub> <sup>+2</sup>                    | 1244.6786 | b <sub>12</sub> -2H <sub>3</sub> PO <sub>4</sub> |
| 138.5870 <sup>+2</sup> | y <sub>2</sub> <sup>+2</sup>                                  | 442.2409               | y <sub>4</sub> -H <sub>3</sub> PO <sub>4</sub>                 | 637.3207 <sup>+2</sup> | b <sub>11</sub> <sup>+2</sup>                                  | 828.8753 <sup>+2</sup> | y <sub>14</sub> <sup>+2</sup>                    | 1273.6341 | b <sub>11</sub>                                  |
| 175.119                | y <sub>1</sub>                                                | 455.7609 <sup>+2</sup> | b <sub>8</sub> -H <sub>3</sub> PO <sub>4</sub> <sup>+2</sup>   | 641.2856 <sup>+2</sup> | y <sub>11</sub> <sup>+2</sup>                                  | 841.4931               | b <sub>7</sub>                                   | 1281.564  | y <sub>11</sub>                                  |
| 187.1133 <sup>+2</sup> | y <sub>3</sub> <sup>+2</sup>                                  | 486.6830 <sup>+2</sup> | y <sub>8</sub> <sup>+2</sup>                                   | 645.3719               | b <sub>5</sub>                                                 | 857.9375 <sup>+2</sup> | MH-H <sub>3</sub> PO <sub>4</sub> <sup>+2</sup>  | 1330.6555 | y <sub>12</sub> -H <sub>3</sub> PO <sub>4</sub>  |
| 193.1133 <sup>+2</sup> | b <sub>3</sub> <sup>+2</sup>                                  | 486.7667 <sup>+2</sup> | y <sub>10</sub> -2H <sub>3</sub> PO <sub>4</sub> <sup>+2</sup> | 665.8314 <sup>+2</sup> | y <sub>12</sub> -H <sub>3</sub> PO <sub>4</sub> <sup>+2</sup>  | 874.3819               | y <sub>8</sub> -H <sub>3</sub> PO <sub>4</sub>   | 1341.7314 | b <sub>13</sub> -2H <sub>3</sub> PO <sub>4</sub> |
| 221.6241 <sup>+2</sup> | y <sub>4</sub> -H <sub>3</sub> PO <sub>4</sub> <sup>+2</sup>  | 487.2288 <sup>+2</sup> | y <sub>9</sub> -H <sub>3</sub> PO <sub>4</sub> <sup>+2</sup>   | 671.3693 <sup>+2</sup> | b <sub>13</sub> -2H <sub>3</sub> PO <sub>4</sub> <sup>+2</sup> | 875.4734               | y <sub>9</sub> -2H <sub>3</sub> PO <sub>4</sub>  | 1342.6555 | b <sub>12</sub> -H <sub>3</sub> PO <sub>4</sub>  |
| 266.6475 <sup>+2</sup> | b <sub>4</sub> <sup>+2</sup>                                  | 504.2873 <sup>+2</sup> | b <sub>9</sub> -H <sub>3</sub> PO <sub>4</sub> <sup>+2</sup>   | 671.8314 <sup>+2</sup> | b <sub>12</sub> -H <sub>3</sub> PO <sub>4</sub> <sup>+2</sup>  | 906.9259 <sup>+2</sup> | MH <sup>+2</sup>                                 | 1347.7056 | y <sub>13</sub> -2H <sub>3</sub> PO <sub>4</sub> |
| 270.1504 <sup>+2</sup> | y <sub>5</sub> -H <sub>3</sub> PO <sub>4</sub> <sup>+2</sup>  | 504.7493 <sup>+2</sup> | b <sub>8</sub> <sup>+2</sup>                                   | 674.3564 <sup>+2</sup> | y <sub>13</sub> -2H <sub>3</sub> PO <sub>4</sub> <sup>+2</sup> | 910.5145               | b <sub>8</sub> -H <sub>3</sub> PO <sub>4</sub>   | 1428.6324 | y <sub>12</sub>                                  |
| 270.1925               | b <sub>2</sub>                                                | 532.2878               | b <sub>4</sub>                                                 | 707.3835               | y <sub>7</sub> -H <sub>3</sub> PO <sub>4</sub>                 | 972.3588               | y <sub>8</sub>                                   | 1439.7083 | b <sub>13</sub> -H <sub>3</sub> PO <sub>4</sub>  |
| 270.6125 <sup>+2</sup> | y <sub>4</sub> <sup>+2</sup>                                  | 535.7552 <sup>+2</sup> | y <sub>10</sub> -H <sub>3</sub> PO <sub>4</sub> <sup>+2</sup>  | 708.3076               | y <sub>6</sub>                                                 | 972.5261               | y <sub>10</sub> -2H <sub>3</sub> PO <sub>4</sub> | 1440.6324 | b <sub>12</sub>                                  |
| 276.1666               | y <sub>2</sub>                                                | 536.2172 <sup>+2</sup> | y <sub>9</sub> <sup>+2</sup>                                   | 714.8198 <sup>+2</sup> | y <sub>12</sub> <sup>+2</sup>                                  | 973.4503               | y <sub>9</sub> -H <sub>3</sub> PO <sub>4</sub>   | 1442.7791 | b <sub>14</sub> -2H <sub>3</sub> PO <sub>4</sub> |
| 305.6690 <sup>+2</sup> | y <sub>6</sub> -H <sub>3</sub> PO <sub>4</sub> <sup>+2</sup>  | 539.2936               | y <sub>5</sub> -H <sub>3</sub> PO <sub>4</sub>                 | 720.3578 <sup>+2</sup> | b <sub>13</sub> -H <sub>3</sub> PO <sub>4</sub> <sup>+2</sup>  | 1007.5673              | b <sub>9</sub> -H <sub>3</sub> PO <sub>4</sub>   | 1445.6825 | y <sub>13</sub> -H <sub>3</sub> PO <sub>4</sub>  |
| 319.1389 <sup>+2</sup> | y <sub>5</sub> <sup>+2</sup>                                  | 539.8058 <sup>+2</sup> | b <sub>10</sub> -H <sub>3</sub> PO <sub>4</sub> <sup>+2</sup>  | 720.8198 <sup>+2</sup> | b <sub>12</sub> <sup>+2</sup>                                  | 1008.4914              | b <sub>8</sub>                                   | 1460.7896 | y <sub>14</sub> -2H <sub>3</sub> PO <sub>4</sub> |
| 323.1896 <sup>+2</sup> | b <sub>5</sub> <sup>+2</sup>                                  | 540.2178               | y <sub>4</sub>                                                 | 721.8932 <sup>+2</sup> | b <sub>14</sub> -2H <sub>3</sub> PO <sub>4</sub> <sup>+2</sup> | 1070.503               | y <sub>10</sub> -H <sub>3</sub> PO <sub>4</sub>  | 1537.6852 | b <sub>13</sub>                                  |
| 354.1954 <sup>+2</sup> | y <sub>7</sub> -H <sub>3</sub> PO <sub>4</sub> <sup>+2</sup>  | 543.3087 <sup>+2</sup> | y <sub>11</sub> -2H <sub>3</sub> PO <sub>4</sub> <sup>+2</sup> | 723.3449 <sup>+2</sup> | y <sub>13</sub> -H <sub>3</sub> PO <sub>4</sub> <sup>+2</sup>  | 1071.4272              | y <sub>9</sub>                                   | 1540.756  | b <sub>14</sub> -H <sub>3</sub> PO <sub>4</sub>  |
| 354.6575 <sup>+2</sup> | y <sub>6</sub> <sup>+2</sup>                                  | 553.2757 <sup>+2</sup> | b <sub>9</sub> <sup>+2</sup>                                   | 730.8985 <sup>+2</sup> | y <sub>14</sub> -2H <sub>3</sub> PO <sub>4</sub> <sup>+2</sup> | 1078.6044              | b <sub>10</sub> -H <sub>3</sub> PO <sub>4</sub>  | 1543.6594 | y <sub>13</sub>                                  |
| 371.7160 <sup>+2</sup> | b <sub>6</sub> <sup>+2</sup>                                  | 584.7436 <sup>+2</sup> | y <sub>10</sub> <sup>+2</sup>                                  | 742.4246               | b <sub>6</sub>                                                 | 1085.6102              | y <sub>11</sub> -2H <sub>3</sub> PO <sub>4</sub> | 1558.7665 | y <sub>14</sub> -H <sub>3</sub> PO <sub>4</sub>  |
| 373.2194               | y <sub>3</sub>                                                | 588.3322 <sup>+2</sup> | b <sub>11</sub> -H <sub>3</sub> PO <sub>4</sub> <sup>+2</sup>  | 769.3462 <sup>+2</sup> | b <sub>13</sub> <sup>+2</sup>                                  | 1105.5442              | b <sub>9</sub>                                   | 1638.7329 | b <sub>14</sub>                                  |
| 385.2194               | b <sub>3</sub>                                                | 588.7943 <sup>+2</sup> | b <sub>10</sub> <sup>+2</sup>                                  | 770.8816 <sup>+2</sup> | b <sub>14</sub> -H <sub>3</sub> PO <sub>4</sub> <sup>+2</sup>  | 1168.4799              | y <sub>10</sub>                                  | 1656.7434 | y <sub>14</sub>                                  |
| 388.7061 <sup>+2</sup> | y <sub>8</sub> -2H <sub>3</sub> PO <sub>4</sub> <sup>+2</sup> | 592.2972 <sup>+2</sup> | y <sub>11</sub> -H <sub>3</sub> PO <sub>4</sub> <sup>+2</sup>  | 772.3333 <sup>+2</sup> | y <sub>13</sub> <sup>+2</sup>                                  | 1175.6572              | b <sub>11</sub> -H <sub>3</sub> PO <sub>4</sub>  | 1714.8676 | MH-H <sub>3</sub> PO <sub>4</sub>                |
| 403.1838 <sup>+2</sup> | y <sub>7</sub> <sup>+2</sup>                                  | 610.3307               | y <sub>6</sub> -H <sub>3</sub> PO <sub>4</sub>                 | 776.405                | y <sub>8</sub> -2H <sub>3</sub> PO <sub>4</sub>                | 1176.5813              | b <sub>10</sub>                                  | 1812.8445 | MH                                               |
| 421.2502 <sup>+2</sup> | b <sub>7</sub> <sup>+2</sup>                                  | 616.8429 <sup>+2</sup> | y <sub>12</sub> -2H <sub>3</sub> PO <sub>4</sub> <sup>+2</sup> | 779.8869 <sup>+2</sup> | y <sub>14</sub> -H <sub>3</sub> PO <sub>4</sub> <sup>+2</sup>  | 1183.5871              | y <sub>11</sub> -H <sub>3</sub> PO <sub>4</sub>  |           |                                                  |



MS/MS Fragmentation of SNsAPLIHGLSDTSPVFQAEAPSAR  
 Found in IPI00061087, Protein FAM122A

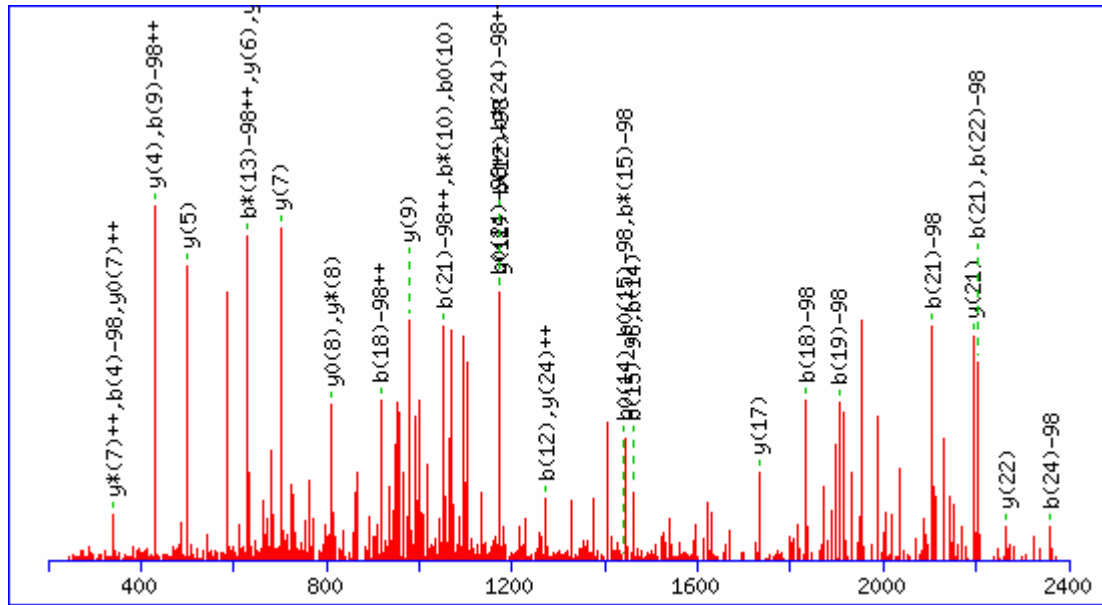

|                        |                                                               |                        |                                                               |                         |                                                               |                         |                                                               |           |                                                 |
|------------------------|---------------------------------------------------------------|------------------------|---------------------------------------------------------------|-------------------------|---------------------------------------------------------------|-------------------------|---------------------------------------------------------------|-----------|-------------------------------------------------|
| 88.0631 <sup>+2</sup>  | y <sub>1</sub> <sup>+2</sup>                                  | 537.1705               | b <sub>5</sub>                                                | 853.4308 <sup>+2</sup>  | b <sub>17</sub> -H <sub>3</sub> PO <sub>4</sub> <sup>+2</sup> | 1157.5351               | b <sub>11</sub>                                               | 1732.8501 | y <sub>17</sub>                                 |
| 123.5817 <sup>+2</sup> | y <sub>2</sub> <sup>+2</sup>                                  | 538.2802 <sup>+2</sup> | y <sub>10</sub> <sup>+2</sup>                                 | 859.4421                | b <sub>9</sub> -H <sub>3</sub> PO <sub>4</sub>                | 1167.0979 <sup>+2</sup> | y <sub>23</sub> -H <sub>3</sub> PO <sub>4</sub> <sup>+2</sup> | 1803.8313 | b <sub>17</sub>                                 |
| 167.0977 <sup>+2</sup> | y <sub>3</sub> <sup>+2</sup>                                  | 552.2776               | b <sub>6</sub> -H <sub>3</sub> PO <sub>4</sub>                | 866.9287 <sup>+2</sup>  | y <sub>17</sub> <sup>+2</sup>                                 | 1172.6058               | y <sub>11</sub>                                               | 1833.913  | b <sub>18</sub> -H <sub>3</sub> PO <sub>4</sub> |
| 175.119                | y <sub>1</sub>                                                | 579.2712 <sup>+2</sup> | b <sub>11</sub> <sup>+2</sup>                                 | 900.3975                | b <sub>8</sub>                                                | 1174.5851               | b <sub>12</sub> -H <sub>3</sub> PO <sub>4</sub>               | 1869.909  | y <sub>18</sub>                                 |
| 202.0822               | b <sub>2</sub>                                                | 586.8066 <sup>+2</sup> | y <sub>11</sub> <sup>+2</sup>                                 | 902.4193 <sup>+2</sup>  | b <sub>17</sub> <sup>+2</sup>                                 | 1180.5795 <sup>+2</sup> | b <sub>24</sub> -H <sub>3</sub> PO <sub>4</sub> <sup>+2</sup> | 1904.9501 | b <sub>19</sub> -H <sub>3</sub> PO <sub>4</sub> |
| 215.6241 <sup>+2</sup> | y <sub>4</sub> <sup>+2</sup>                                  | 587.7962 <sup>+2</sup> | b <sub>12</sub> -H <sub>3</sub> PO <sub>4</sub> <sup>+2</sup> | 917.4601 <sup>+2</sup>  | b <sub>18</sub> -H <sub>3</sub> PO <sub>4</sub> <sup>+2</sup> | 1194.0494 <sup>+2</sup> | b <sub>23</sub> <sup>+2</sup>                                 | 1931.8899 | b <sub>18</sub>                                 |
| 246.1561               | y <sub>2</sub>                                                | 630.3206               | y <sub>6</sub>                                                | 935.4581 <sup>+2</sup>  | y <sub>18</sub> <sup>+2</sup>                                 | 1216.0863 <sup>+2</sup> | y <sub>23</sub> <sup>+2</sup>                                 | 1982.993  | y <sub>19</sub>                                 |
| 251.1426 <sup>+2</sup> | y <sub>5</sub> <sup>+2</sup>                                  | 630.3226 <sup>+2</sup> | y <sub>12</sub> <sup>+2</sup>                                 | 952.9787 <sup>+2</sup>  | b <sub>19</sub> -H <sub>3</sub> PO <sub>4</sub> <sup>+2</sup> | 1224.1193 <sup>+2</sup> | y <sub>24</sub> -H <sub>3</sub> PO <sub>4</sub> <sup>+2</sup> | 2002.927  | b <sub>19</sub>                                 |
| 271.1037               | b <sub>3</sub> -H <sub>3</sub> PO <sub>4</sub>                | 636.7846 <sup>+2</sup> | b <sub>12</sub> <sup>+2</sup>                                 | 957.419                 | b <sub>9</sub>                                                | 1229.5679 <sup>+2</sup> | b <sub>24</sub> <sup>+2</sup>                                 | 2033.9927 | b <sub>20</sub> -H <sub>3</sub> PO <sub>4</sub> |
| 315.6639 <sup>+2</sup> | y <sub>6</sub> <sup>+2</sup>                                  | 638.3200 <sup>+2</sup> | b <sub>13</sub> -H <sub>3</sub> PO <sub>4</sub> <sup>+2</sup> | 966.4486 <sup>+2</sup>  | b <sub>18</sub> <sup>+2</sup>                                 | 1259.6379               | y <sub>12</sub>                                               | 2096.0771 | y <sub>20</sub>                                 |
| 333.1881               | y <sub>3</sub>                                                | 650.2545               | b <sub>6</sub>                                                | 972.5261                | b <sub>10</sub> -H <sub>3</sub> PO <sub>4</sub>               | 1267.6353 <sup>+2</sup> | MH-H <sub>3</sub> PO <sub>4</sub> <sup>+2</sup>               | 2105.0298 | b <sub>21</sub> -H <sub>3</sub> PO <sub>4</sub> |
| 342.1408               | b <sub>4</sub> -H <sub>3</sub> PO <sub>4</sub>                | 665.3617               | b <sub>7</sub> -H <sub>3</sub> PO <sub>4</sub>                | 976.4847                | y <sub>9</sub>                                                | 1272.562                | b <sub>12</sub>                                               | 2131.9696 | b <sub>20</sub>                                 |
| 351.1825 <sup>+2</sup> | y <sub>7</sub> <sup>+2</sup>                                  | 680.8464 <sup>+2</sup> | y <sub>13</sub> <sup>+2</sup>                                 | 992.0002 <sup>+2</sup>  | y <sub>19</sub> <sup>+2</sup>                                 | 1273.1078 <sup>+2</sup> | y <sub>24</sub> <sup>+2</sup>                                 | 2193.1299 | y <sub>21</sub>                                 |
| 369.0806               | b <sub>3</sub>                                                | 681.8360 <sup>+2</sup> | b <sub>14</sub> -H <sub>3</sub> PO <sub>4</sub> <sup>+2</sup> | 1001.9671 <sup>+2</sup> | b <sub>19</sub> <sup>+2</sup>                                 | 1275.6328               | b <sub>13</sub> -H <sub>3</sub> PO <sub>4</sub>               | 2202.0826 | b <sub>22</sub> -H <sub>3</sub> PO <sub>4</sub> |
| 401.7139 <sup>+2</sup> | b <sub>8</sub> -H <sub>3</sub> PO <sub>4</sub> <sup>+2</sup>  | 687.3085 <sup>+2</sup> | b <sub>13</sub> <sup>+2</sup>                                 | 1017.5000 <sup>+2</sup> | b <sub>20</sub> -H <sub>3</sub> PO <sub>4</sub> <sup>+2</sup> | 1316.6238 <sup>+2</sup> | MH <sup>+2</sup>                                              | 2203.0067 | b <sub>21</sub>                                 |
| 415.2118 <sup>+2</sup> | y <sub>8</sub> <sup>+2</sup>                                  | 701.3577               | y <sub>7</sub>                                                | 1048.5422 <sup>+2</sup> | y <sub>20</sub> <sup>+2</sup>                                 | 1360.6856               | y <sub>13</sub>                                               | 2264.167  | y <sub>22</sub>                                 |
| 430.2247 <sup>+2</sup> | b <sub>9</sub> -H <sub>3</sub> PO <sub>4</sub> <sup>+2</sup>  | 730.3624 <sup>+2</sup> | b <sub>15</sub> -H <sub>3</sub> PO <sub>4</sub> <sup>+2</sup> | 1053.0185 <sup>+2</sup> | b <sub>21</sub> -H <sub>3</sub> PO <sub>4</sub> <sup>+2</sup> | 1362.6648               | b <sub>14</sub> -H <sub>3</sub> PO <sub>4</sub>               | 2289.1146 | b <sub>23</sub> -H <sub>3</sub> PO <sub>4</sub> |
| 430.2409               | y <sub>4</sub>                                                | 730.8245 <sup>+2</sup> | b <sub>14</sub> <sup>+2</sup>                                 | 1059.5582               | b <sub>11</sub> -H <sub>3</sub> PO <sub>4</sub>               | 1373.6097               | b <sub>13</sub>                                               | 2300.0595 | b <sub>22</sub>                                 |
| 439.1936               | b <sub>5</sub> -H <sub>3</sub> PO <sub>4</sub>                | 738.3599 <sup>+2</sup> | y <sub>14</sub> <sup>+2</sup>                                 | 1066.4884 <sup>+2</sup> | b <sub>20</sub> <sup>+2</sup>                                 | 1459.7176               | b <sub>15</sub> -H <sub>3</sub> PO <sub>4</sub>               | 2333.1884 | y <sub>23</sub> -H <sub>3</sub> PO <sub>4</sub> |
| 440.1177               | b <sub>4</sub>                                                | 763.3386               | b <sub>7</sub>                                                | 1070.503                | b <sub>10</sub>                                               | 1460.6417               | b <sub>14</sub>                                               | 2360.1517 | b <sub>24</sub> -H <sub>3</sub> PO <sub>4</sub> |
| 450.7024 <sup>+2</sup> | b <sub>8</sub> <sup>+2</sup>                                  | 779.3509 <sup>+2</sup> | b <sub>15</sub> <sup>+2</sup>                                 | 1075.5531               | y <sub>10</sub>                                               | 1475.7125               | y <sub>14</sub>                                               | 2387.0915 | b <sub>23</sub>                                 |
| 479.2131 <sup>+2</sup> | b <sub>9</sub> <sup>+2</sup>                                  | 779.8966 <sup>+2</sup> | b <sub>16</sub> -H <sub>3</sub> PO <sub>4</sub> <sup>+2</sup> | 1097.0686 <sup>+2</sup> | y <sub>21</sub> <sup>+2</sup>                                 | 1557.6945               | b <sub>15</sub>                                               | 2431.1653 | y <sub>23</sub>                                 |
| 486.7667 <sup>+2</sup> | b <sub>10</sub> -H <sub>3</sub> PO <sub>4</sub> <sup>+2</sup> | 781.8759 <sup>+2</sup> | y <sub>15</sub> <sup>+2</sup>                                 | 1101.5449 <sup>+2</sup> | b <sub>22</sub> -H <sub>3</sub> PO <sub>4</sub> <sup>+2</sup> | 1558.786                | b <sub>16</sub> -H <sub>3</sub> PO <sub>4</sub>               | 2447.2314 | y <sub>24</sub> -H <sub>3</sub> PO <sub>4</sub> |
| 488.7460 <sup>+2</sup> | y <sub>9</sub> <sup>+2</sup>                                  | 802.4206               | b <sub>8</sub> -H <sub>3</sub> PO <sub>4</sub>                | 1102.0070 <sup>+2</sup> | b <sub>21</sub> <sup>+2</sup>                                 | 1562.7445               | y <sub>15</sub>                                               | 2458.1286 | b <sub>24</sub>                                 |
| 501.278                | y <sub>5</sub>                                                | 828.8851 <sup>+2</sup> | b <sub>16</sub> <sup>+2</sup>                                 | 1132.5871 <sup>+2</sup> | y <sub>22</sub> <sup>+2</sup>                                 | 1656.7629               | b <sub>16</sub>                                               | 2534.2634 | MH-H <sub>3</sub> PO <sub>4</sub>               |
| 530.2827 <sup>+2</sup> | b <sub>11</sub> -H <sub>3</sub> PO <sub>4</sub> <sup>+2</sup> | 829.4163               | y <sub>8</sub>                                                | 1145.0609 <sup>+2</sup> | b <sub>23</sub> -H <sub>3</sub> PO <sub>4</sub> <sup>+2</sup> | 1675.8286               | y <sub>16</sub>                                               | 2545.2083 | y <sub>24</sub>                                 |
| 535.7552 <sup>+2</sup> | b <sub>10</sub> <sup>+2</sup>                                 | 838.4179 <sup>+2</sup> | y <sub>16</sub> <sup>+2</sup>                                 | 1150.5334 <sup>+2</sup> | b <sub>22</sub> <sup>+2</sup>                                 | 1705.8544               | b <sub>17</sub> -H <sub>3</sub> PO <sub>4</sub>               | 2632.2403 | MH                                              |

MS/MS Fragmentation of RSNsAPLIHGLSDTSPVFQAEAPSAR  
 Found in IPI00061087, Protein FAM122A

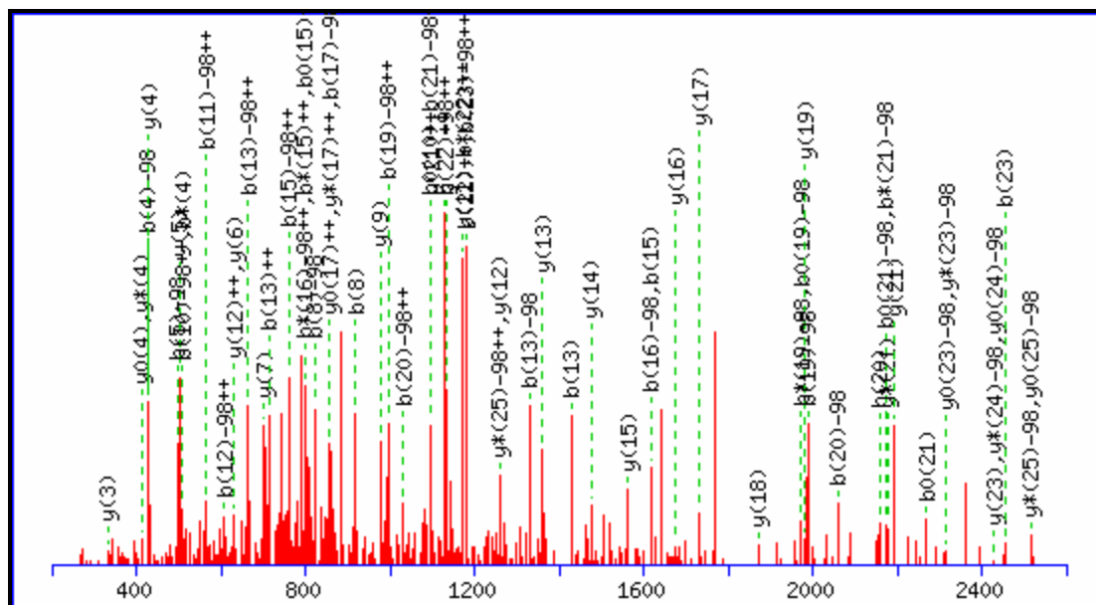

|                        |                                                              |                        |                                                               |                         |                                                               |                         |                                                               |           |                                                 |
|------------------------|--------------------------------------------------------------|------------------------|---------------------------------------------------------------|-------------------------|---------------------------------------------------------------|-------------------------|---------------------------------------------------------------|-----------|-------------------------------------------------|
| 88.0631 <sup>+2</sup>  | y <sub>1</sub> <sup>+2</sup>                                 | 508.2752 <sup>+2</sup> | b <sub>10</sub> -H <sub>3</sub> PO <sub>4</sub> <sup>+2</sup> | 857.4014 <sup>+2</sup>  | b <sub>16</sub> <sup>+2</sup>                                 | 1216.0863 <sup>+2</sup> | y <sub>23</sub> <sup>+2</sup>                                 | 1869.909  | y <sub>18</sub>                                 |
| 122.5738 <sup>+2</sup> | b <sub>2</sub> <sup>+2</sup>                                 | 525.1817               | b <sub>4</sub>                                                | 857.9472 <sup>+2</sup>  | b <sub>17</sub> -H <sub>3</sub> PO <sub>4</sub> <sup>+2</sup> | 1223.1115 <sup>+2</sup> | b <sub>24</sub> -H <sub>3</sub> PO <sub>4</sub> <sup>+2</sup> | 1959.9324 | b <sub>18</sub>                                 |
| 123.5817 <sup>+2</sup> | y <sub>2</sub> <sup>+2</sup>                                 | 528.7529 <sup>+2</sup> | b <sub>9</sub> <sup>+2</sup>                                  | 866.9287 <sup>+2</sup>  | y <sub>17</sub> <sup>+2</sup>                                 | 1224.1193 <sup>+2</sup> | y <sub>24</sub> -H <sub>3</sub> PO <sub>4</sub> <sup>+2</sup> | 1982.993  | y <sub>19</sub>                                 |
| 167.0977 <sup>+2</sup> | y <sub>3</sub> <sup>+2</sup>                                 | 538.2802 <sup>+2</sup> | y <sub>10</sub> <sup>+2</sup>                                 | 906.9356 <sup>+2</sup>  | b <sub>17</sub> <sup>+2</sup>                                 | 1226.6041               | b <sub>11</sub>                                               | 1990.0141 | b <sub>19</sub> -H <sub>3</sub> PO <sub>4</sub> |
| 175.119                | y <sub>1</sub>                                               | 557.2637 <sup>+2</sup> | b <sub>10</sub> <sup>+2</sup>                                 | 919.4397                | b <sub>8</sub>                                                | 1228.5839 <sup>+2</sup> | b <sub>23</sub> <sup>+2</sup>                                 | 2061.0512 | b <sub>20</sub> -H <sub>3</sub> PO <sub>4</sub> |
| 179.5953 <sup>+2</sup> | b <sub>3</sub> <sup>+2</sup>                                 | 564.8173 <sup>+2</sup> | b <sub>11</sub> -H <sub>3</sub> PO <sub>4</sub> <sup>+2</sup> | 931.4814 <sup>+2</sup>  | b <sub>18</sub> -H <sub>3</sub> PO <sub>4</sub> <sup>+2</sup> | 1258.6301 <sup>+2</sup> | b <sub>25</sub> -H <sub>3</sub> PO <sub>4</sub> <sup>+2</sup> | 2087.991  | b <sub>19</sub>                                 |
| 214.1060 <sup>+2</sup> | b <sub>4</sub> -H <sub>3</sub> PO <sub>4</sub> <sup>+2</sup> | 586.8066 <sup>+2</sup> | y <sub>11</sub> <sup>+2</sup>                                 | 935.4581 <sup>+2</sup>  | y <sub>18</sub> <sup>+2</sup>                                 | 1259.6379               | y <sub>12</sub>                                               | 2096.0771 | y <sub>20</sub>                                 |
| 215.6241 <sup>+2</sup> | y <sub>4</sub> <sup>+2</sup>                                 | 595.2947               | b <sub>6</sub> -H <sub>3</sub> PO <sub>4</sub>                | 958.5217                | b <sub>9</sub> -H <sub>3</sub> PO <sub>4</sub>                | 1267.6353 <sup>+2</sup> | y <sub>25</sub> -H <sub>3</sub> PO <sub>4</sub> <sup>+2</sup> | 2159.0281 | b <sub>20</sub>                                 |
| 244.1404               | b <sub>2</sub>                                               | 596.2188               | b <sub>5</sub>                                                | 976.4847                | y <sub>9</sub>                                                | 1272.0999 <sup>+2</sup> | b <sub>24</sub> <sup>+2</sup>                                 | 2190.0938 | b <sub>21</sub> -H <sub>3</sub> PO <sub>4</sub> |
| 246.1561               | y <sub>2</sub>                                               | 608.3333 <sup>+2</sup> | b <sub>12</sub> -H <sub>3</sub> PO <sub>4</sub> <sup>+2</sup> | 980.4698 <sup>+2</sup>  | b <sub>18</sub> <sup>+2</sup>                                 | 1273.1078 <sup>+2</sup> | y <sub>24</sub> <sup>+2</sup>                                 | 2193.1299 | y <sub>21</sub>                                 |
| 249.6246 <sup>+2</sup> | b <sub>5</sub> -H <sub>3</sub> PO <sub>4</sub> <sup>+2</sup> | 613.8057 <sup>+2</sup> | b <sub>11</sub> <sup>+2</sup>                                 | 992.0002 <sup>+2</sup>  | y <sub>19</sub> <sup>+2</sup>                                 | 1307.6185 <sup>+2</sup> | b <sub>25</sub> <sup>+2</sup>                                 | 2261.1309 | b <sub>22</sub> -H <sub>3</sub> PO <sub>4</sub> |
| 251.1426 <sup>+2</sup> | y <sub>5</sub> <sup>+2</sup>                                 | 630.3206               | y <sub>6</sub>                                                | 995.5107 <sup>+2</sup>  | b <sub>19</sub> -H <sub>3</sub> PO <sub>4</sub> <sup>+2</sup> | 1313.6362               | b <sub>12</sub>                                               | 2264.167  | y <sub>22</sub>                                 |
| 263.0945 <sup>+2</sup> | b <sub>4</sub> <sup>+2</sup>                                 | 630.3226 <sup>+2</sup> | y <sub>12</sub> <sup>+2</sup>                                 | 1015.5432               | b <sub>10</sub> -H <sub>3</sub> PO <sub>4</sub>               | 1316.6238 <sup>+2</sup> | y <sub>25</sub> <sup>+2</sup>                                 | 2288.0707 | b <sub>21</sub>                                 |
| 298.1510 <sup>+2</sup> | b <sub>6</sub> -H <sub>3</sub> PO <sub>4</sub> <sup>+2</sup> | 657.3217 <sup>+2</sup> | b <sub>12</sub> <sup>+2</sup>                                 | 1031.0292 <sup>+2</sup> | b <sub>20</sub> -H <sub>3</sub> PO <sub>4</sub> <sup>+2</sup> | 1330.6862               | b <sub>13</sub> -H <sub>3</sub> PO <sub>4</sub>               | 2333.1884 | y <sub>23</sub> -H <sub>3</sub> PO <sub>4</sub> |
| 298.6130 <sup>+2</sup> | b <sub>5</sub> <sup>+2</sup>                                 | 665.8468 <sup>+2</sup> | b <sub>13</sub> -H <sub>3</sub> PO <sub>4</sub> <sup>+2</sup> | 1044.4991 <sup>+2</sup> | b <sub>19</sub> <sup>+2</sup>                                 | 1345.6859 <sup>+2</sup> | MH-H <sub>3</sub> PO <sub>4</sub> <sup>+2</sup>               | 2358.1837 | b <sub>23</sub> -H <sub>3</sub> PO <sub>4</sub> |
| 315.6639 <sup>+2</sup> | y <sub>6</sub> <sup>+2</sup>                                 | 680.8464 <sup>+2</sup> | y <sub>13</sub> <sup>+2</sup>                                 | 1048.5422 <sup>+2</sup> | y <sub>20</sub> <sup>+2</sup>                                 | 1360.6856               | y <sub>13</sub>                                               | 2359.1078 | b <sub>22</sub>                                 |
| 333.1881               | y <sub>3</sub>                                               | 693.2716               | b <sub>6</sub>                                                | 1056.4986               | b <sub>9</sub>                                                | 1394.6743 <sup>+2</sup> | MH <sup>+2</sup>                                              | 2431.1653 | y <sub>23</sub>                                 |
| 347.1394 <sup>+2</sup> | b <sub>6</sub> <sup>+2</sup>                                 | 701.3577               | y <sub>7</sub>                                                | 1075.5531               | y <sub>10</sub>                                               | 1428.6631               | b <sub>13</sub>                                               | 2445.2157 | b <sub>24</sub> -H <sub>3</sub> PO <sub>4</sub> |
| 351.1825 <sup>+2</sup> | y <sub>7</sub> <sup>+2</sup>                                 | 708.3787               | b <sub>7</sub> -H <sub>3</sub> PO <sub>4</sub>                | 1080.0177 <sup>+2</sup> | b <sub>20</sub> <sup>+2</sup>                                 | 1431.7339               | b <sub>14</sub> -H <sub>3</sub> PO <sub>4</sub>               | 2447.2314 | y <sub>24</sub> -H <sub>3</sub> PO <sub>4</sub> |
| 354.6930 <sup>+2</sup> | b <sub>7</sub> -H <sub>3</sub> PO <sub>4</sub> <sup>+2</sup> | 714.8352 <sup>+2</sup> | b <sub>13</sub> <sup>+2</sup>                                 | 1095.5505 <sup>+2</sup> | b <sub>21</sub> -H <sub>3</sub> PO <sub>4</sub> <sup>+2</sup> | 1475.7125               | y <sub>14</sub>                                               | 2456.1606 | b <sub>23</sub>                                 |
| 358.1833               | b <sub>3</sub>                                               | 716.3706 <sup>+2</sup> | b <sub>14</sub> -H <sub>3</sub> PO <sub>4</sub> <sup>+2</sup> | 1097.0686 <sup>+2</sup> | y <sub>21</sub> <sup>+2</sup>                                 | 1518.7659               | b <sub>15</sub> -H <sub>3</sub> PO <sub>4</sub>               | 2516.2528 | b <sub>25</sub> -H <sub>3</sub> PO <sub>4</sub> |
| 403.6815 <sup>+2</sup> | b <sub>7</sub> <sup>+2</sup>                                 | 738.3599 <sup>+2</sup> | y <sub>14</sub> <sup>+2</sup>                                 | 1113.5201               | b <sub>10</sub>                                               | 1529.7108               | b <sub>14</sub>                                               | 2534.2634 | y <sub>25</sub> -H <sub>3</sub> PO <sub>4</sub> |
| 411.2350 <sup>+2</sup> | b <sub>8</sub> -H <sub>3</sub> PO <sub>4</sub> <sup>+2</sup> | 759.8866 <sup>+2</sup> | b <sub>15</sub> -H <sub>3</sub> PO <sub>4</sub> <sup>+2</sup> | 1128.6273               | b <sub>11</sub> -H <sub>3</sub> PO <sub>4</sub>               | 1562.7445               | y <sub>15</sub>                                               | 2543.1926 | b <sub>24</sub>                                 |
| 415.2118 <sup>+2</sup> | y <sub>8</sub> <sup>+2</sup>                                 | 765.3590 <sup>+2</sup> | b <sub>14</sub> <sup>+2</sup>                                 | 1131.0691 <sup>+2</sup> | b <sub>22</sub> -H <sub>3</sub> PO <sub>4</sub> <sup>+2</sup> | 1615.8187               | b <sub>16</sub> -H <sub>3</sub> PO <sub>4</sub>               | 2545.2083 | y <sub>24</sub>                                 |
| 427.2048               | b <sub>4</sub> -H <sub>3</sub> PO <sub>4</sub>               | 781.8759 <sup>+2</sup> | y <sub>15</sub> <sup>+2</sup>                                 | 1132.5871 <sup>+2</sup> | y <sub>22</sub> <sup>+2</sup>                                 | 1616.7428               | b <sub>15</sub>                                               | 2614.2297 | b <sub>25</sub>                                 |
| 430.2409               | y <sub>4</sub>                                               | 806.3556               | b <sub>7</sub>                                                | 1144.5390 <sup>+2</sup> | b <sub>21</sub> <sup>+2</sup>                                 | 1675.8286               | y <sub>16</sub>                                               | 2632.2403 | y <sub>25</sub>                                 |
| 460.2235 <sup>+2</sup> | b <sub>8</sub> <sup>+2</sup>                                 | 808.4130 <sup>+2</sup> | b <sub>16</sub> -H <sub>3</sub> PO <sub>4</sub> <sup>+2</sup> | 1167.0979 <sup>+2</sup> | y <sub>23</sub> -H <sub>3</sub> PO <sub>4</sub> <sup>+2</sup> | 1713.7956               | b <sub>16</sub>                                               | 2690.3645 | MH-H <sub>3</sub> PO <sub>4</sub>               |
| 479.7645 <sup>+2</sup> | b <sub>9</sub> -H <sub>3</sub> PO <sub>4</sub> <sup>+2</sup> | 808.8751 <sup>+2</sup> | b <sub>15</sub> <sup>+2</sup>                                 | 1172.6058               | y <sub>11</sub>                                               | 1714.8871               | b <sub>17</sub> -H <sub>3</sub> PO <sub>4</sub>               | 2788.3414 | MH                                              |
| 488.7460 <sup>+2</sup> | y <sub>9</sub> <sup>+2</sup>                                 | 821.4628               | b <sub>8</sub> -H <sub>3</sub> PO <sub>4</sub>                | 1179.5955 <sup>+2</sup> | b <sub>23</sub> -H <sub>3</sub> PO <sub>4</sub> <sup>+2</sup> | 1732.8501               | y <sub>17</sub>                                               |           |                                                 |
| 498.2419               | b <sub>5</sub> -H <sub>3</sub> PO <sub>4</sub>               | 829.4163               | y <sub>8</sub>                                                | 1180.0575 <sup>+2</sup> | b <sub>22</sub> <sup>+2</sup>                                 | 1812.864                | b <sub>17</sub>                                               |           |                                                 |
| 501.278                | y <sub>5</sub>                                               | 838.4179 <sup>+2</sup> | y <sub>16</sub> <sup>+2</sup>                                 | 1215.6593               | b <sub>12</sub> -H <sub>3</sub> PO <sub>4</sub>               | 1861.9555               | b <sub>18</sub> -H <sub>3</sub> PO <sub>4</sub>               |           |                                                 |

MS/MS Fragmentation of AMsLNTLNVDAPR  
 Found in IPI00478456, Isoform 1 of Kinesin light chain 3

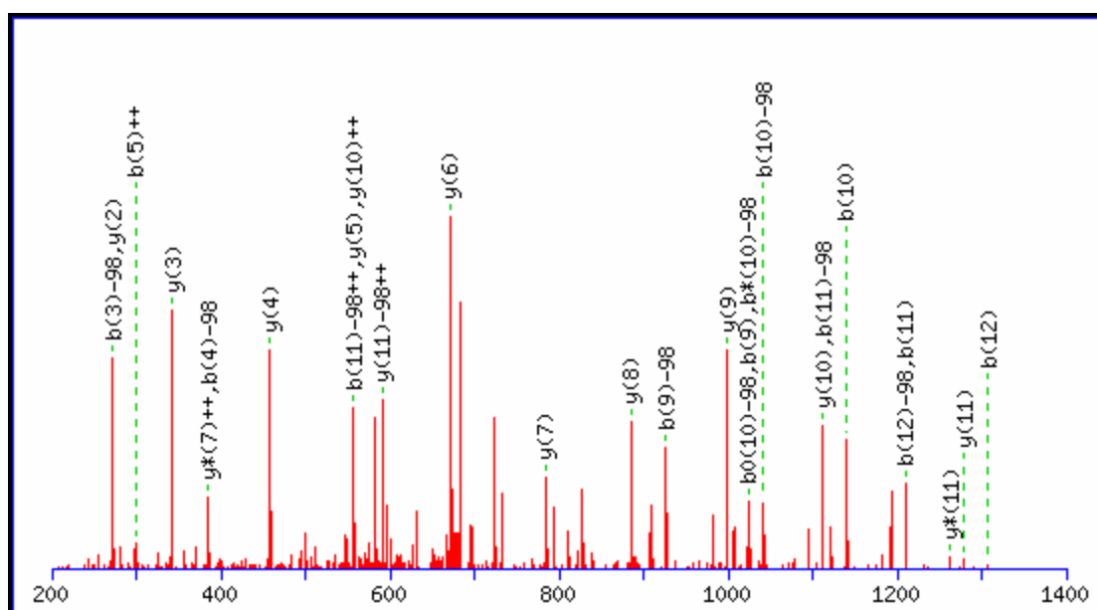

|                        |                                                |                        |                                                               |                        |                                                               |           |                                                 |           |                                                 |
|------------------------|------------------------------------------------|------------------------|---------------------------------------------------------------|------------------------|---------------------------------------------------------------|-----------|-------------------------------------------------|-----------|-------------------------------------------------|
| 88.0631 <sup>+2</sup>  | y <sub>1</sub> <sup>+2</sup>                   | 370.0832               | b <sub>3</sub>                                                | 597.2102               | b <sub>5</sub>                                                | 811.342   | b <sub>7</sub>                                  | 1181.6273 | y <sub>11</sub> -H <sub>3</sub> PO <sub>4</sub> |
| 136.5895 <sup>+2</sup> | y <sub>2</sub> <sup>+2</sup>                   | 385.1904               | b <sub>4</sub> -H <sub>3</sub> PO <sub>4</sub>                | 600.281                | b <sub>6</sub> -H <sub>3</sub> PO <sub>4</sub>                | 827.408   | b <sub>8</sub> -H <sub>3</sub> PO <sub>4</sub>  | 1209.5932 | b <sub>12</sub> -H <sub>3</sub> PO <sub>4</sub> |
| 172.1081 <sup>+2</sup> | y <sub>3</sub> <sup>+2</sup>                   | 392.7192 <sup>+2</sup> | y <sub>7</sub> <sup>+2</sup>                                  | 640.3057 <sup>+2</sup> | y <sub>11</sub> <sup>+2</sup>                                 | 885.4789  | y <sub>8</sub>                                  | 1210.5174 | b <sub>11</sub>                                 |
| 175.119                | y <sub>1</sub>                                 | 443.2431 <sup>+2</sup> | y <sub>8</sub> <sup>+2</sup>                                  | 656.8375 <sup>+2</sup> | y <sub>12</sub> -H <sub>3</sub> PO <sub>4</sub> <sup>+2</sup> | 925.3849  | b <sub>8</sub>                                  | 1279.6042 | y <sub>11</sub>                                 |
| 203.0849               | b <sub>2</sub>                                 | 458.2358               | y <sub>4</sub>                                                | 671.3471               | y <sub>6</sub>                                                | 926.4764  | b <sub>9</sub> -H <sub>3</sub> PO <sub>4</sub>  | 1307.5701 | b <sub>12</sub>                                 |
| 229.6215 <sup>+2</sup> | y <sub>4</sub> <sup>+2</sup>                   | 483.1673               | b <sub>4</sub>                                                | 692.3561 <sup>+2</sup> | MH-H <sub>3</sub> PO <sub>4</sub> <sup>+2</sup>               | 999.5218  | y <sub>9</sub>                                  | 1312.6678 | y <sub>12</sub> -H <sub>3</sub> PO <sub>4</sub> |
| 272.1063               | b <sub>3</sub> -H <sub>3</sub> PO <sub>4</sub> | 499.2333               | b <sub>5</sub> -H <sub>3</sub> PO <sub>4</sub>                | 698.2579               | b <sub>6</sub>                                                | 1024.4533 | b <sub>9</sub>                                  | 1383.7049 | MH-H <sub>3</sub> PO <sub>4</sub>               |
| 272.1717               | y <sub>2</sub>                                 | 500.2645 <sup>+2</sup> | y <sub>9</sub> <sup>+2</sup>                                  | 705.8260 <sup>+2</sup> | y <sub>12</sub> <sup>+2</sup>                                 | 1041.5034 | b <sub>10</sub> -H <sub>3</sub> PO <sub>4</sub> | 1410.6447 | y <sub>12</sub>                                 |
| 279.1557 <sup>+2</sup> | y <sub>5</sub> <sup>+2</sup>                   | 556.8066 <sup>+2</sup> | y <sub>10</sub> <sup>+2</sup>                                 | 713.3651               | b <sub>7</sub> -H <sub>3</sub> PO <sub>4</sub>                | 1112.5405 | b <sub>11</sub> -H <sub>3</sub> PO <sub>4</sub> | 1481.6818 | MH                                              |
| 336.1772 <sup>+2</sup> | y <sub>6</sub> <sup>+2</sup>                   | 557.3042               | y <sub>5</sub>                                                | 741.3445 <sup>+2</sup> | MH <sup>+2</sup>                                              | 1112.6058 | y <sub>10</sub>                                 |           |                                                 |
| 343.2088               | y <sub>3</sub>                                 | 591.3173 <sup>+2</sup> | y <sub>11</sub> -H <sub>3</sub> PO <sub>4</sub> <sup>+2</sup> | 784.4312               | y <sub>7</sub>                                                | 1139.4803 | b <sub>10</sub>                                 |           |                                                 |

MS/MS Fragmentation of RAMsLNTLNVDAPR  
 Found in IPI00478456, Isoform 1 of Kinesin light chain 3

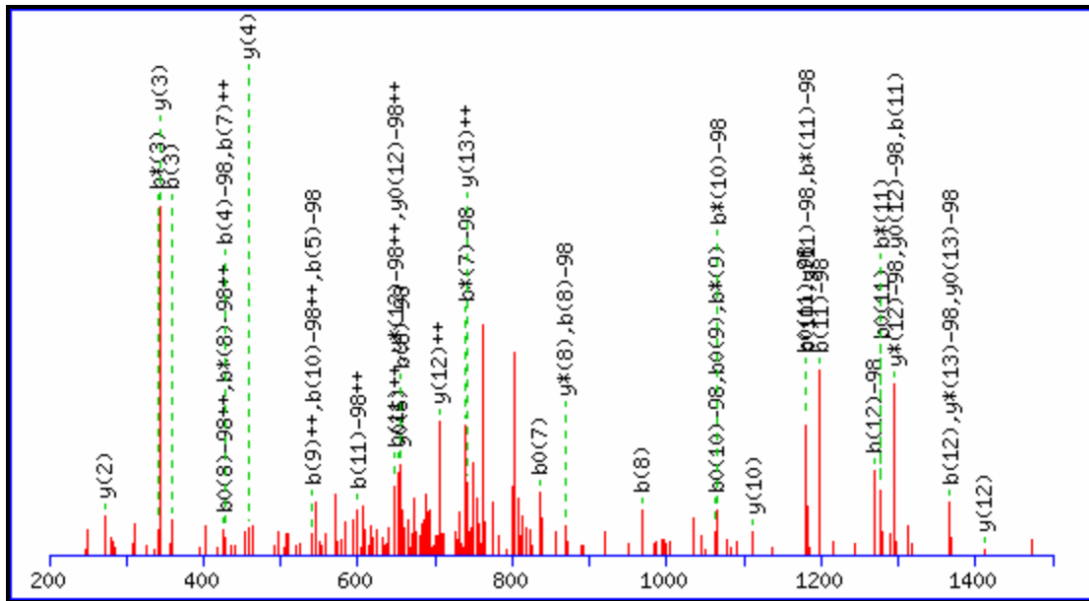

|                        |                                                              |                        |                                                              |                        |                                                               |                        |                                                 |           |                                                 |
|------------------------|--------------------------------------------------------------|------------------------|--------------------------------------------------------------|------------------------|---------------------------------------------------------------|------------------------|-------------------------------------------------|-----------|-------------------------------------------------|
| 88.0631 <sup>+2</sup>  | y <sub>1</sub> <sup>+2</sup>                                 | 343.2088               | y <sub>3</sub>                                               | 541.7924 <sup>+2</sup> | b <sub>10</sub> -H <sub>3</sub> PO <sub>4</sub> <sup>+2</sup> | 705.8260 <sup>+2</sup> | y <sub>12</sub> <sup>+2</sup>                   | 1112.6058 | y <sub>10</sub>                                 |
| 114.5764 <sup>+2</sup> | b <sub>2</sub> <sup>+2</sup>                                 | 359.186                | b <sub>3</sub>                                               | 556.8066 <sup>+2</sup> | y <sub>10</sub> <sup>+2</sup>                                 | 732.3393 <sup>+2</sup> | b <sub>13</sub> <sup>+2</sup>                   | 1180.5544 | b <sub>10</sub>                                 |
| 136.5895 <sup>+2</sup> | y <sub>2</sub> <sup>+2</sup>                                 | 377.1593 <sup>+2</sup> | b <sub>6</sub> <sup>+2</sup>                                 | 557.3042               | y <sub>5</sub>                                                | 741.3445 <sup>+2</sup> | y <sub>13</sub> <sup>+2</sup>                   | 1181.6273 | y <sub>11</sub> -H <sub>3</sub> PO <sub>4</sub> |
| 172.1081 <sup>+2</sup> | y <sub>3</sub> <sup>+2</sup>                                 | 378.6947 <sup>+2</sup> | b <sub>7</sub> -H <sub>3</sub> PO <sub>4</sub> <sup>+2</sup> | 590.7808 <sup>+2</sup> | b <sub>10</sub> <sup>+2</sup>                                 | 753.3113               | b <sub>6</sub>                                  | 1197.6045 | b <sub>11</sub> -H <sub>3</sub> PO <sub>4</sub> |
| 175.119                | y <sub>1</sub>                                               | 392.7192 <sup>+2</sup> | y <sub>7</sub> <sup>+2</sup>                                 | 591.3173 <sup>+2</sup> | y <sub>11</sub> -H <sub>3</sub> PO <sub>4</sub> <sup>+2</sup> | 756.3821               | b <sub>7</sub> -H <sub>3</sub> PO <sub>4</sub>  | 1268.6416 | b <sub>12</sub> -H <sub>3</sub> PO <sub>4</sub> |
| 180.0966 <sup>+2</sup> | b <sub>3</sub> <sup>+2</sup>                                 | 427.6831 <sup>+2</sup> | b <sub>7</sub> <sup>+2</sup>                                 | 599.3059 <sup>+2</sup> | b <sub>11</sub> -H <sub>3</sub> PO <sub>4</sub> <sup>+2</sup> | 770.4066 <sup>+2</sup> | MH-H <sub>3</sub> PO <sub>4</sub> <sup>+2</sup> | 1279.6042 | y <sub>11</sub>                                 |
| 214.6074 <sup>+2</sup> | b <sub>4</sub> -H <sub>3</sub> PO <sub>4</sub> <sup>+2</sup> | 428.2074               | b <sub>4</sub> -H <sub>3</sub> PO <sub>4</sub>               | 634.8244 <sup>+2</sup> | b <sub>12</sub> -H <sub>3</sub> PO <sub>4</sub> <sup>+2</sup> | 784.4312               | y <sub>7</sub>                                  | 1295.5814 | b <sub>11</sub>                                 |
| 228.1455               | b <sub>2</sub>                                               | 435.2367 <sup>+2</sup> | b <sub>8</sub> -H <sub>3</sub> PO <sub>4</sub> <sup>+2</sup> | 639.2684               | b <sub>5</sub>                                                | 819.3951 <sup>+2</sup> | MH <sup>+2</sup>                                | 1312.6678 | y <sub>12</sub> -H <sub>3</sub> PO <sub>4</sub> |
| 229.6215 <sup>+2</sup> | y <sub>4</sub> <sup>+2</sup>                                 | 443.2431 <sup>+2</sup> | y <sub>8</sub> <sup>+2</sup>                                 | 640.3057 <sup>+2</sup> | y <sub>11</sub> <sup>+2</sup>                                 | 854.359                | b <sub>7</sub>                                  | 1365.6943 | b <sub>13</sub> -H <sub>3</sub> PO <sub>4</sub> |
| 263.5958 <sup>+2</sup> | b <sub>4</sub> <sup>+2</sup>                                 | 458.2358               | y <sub>4</sub>                                               | 648.2943 <sup>+2</sup> | b <sub>11</sub> <sup>+2</sup>                                 | 869.4662               | b <sub>8</sub> -H <sub>3</sub> PO <sub>4</sub>  | 1366.6185 | b <sub>12</sub>                                 |
| 271.1494 <sup>+2</sup> | b <sub>5</sub> -H <sub>3</sub> PO <sub>4</sub> <sup>+2</sup> | 484.2252 <sup>+2</sup> | b <sub>8</sub> <sup>+2</sup>                                 | 655.3344               | b <sub>6</sub> -H <sub>3</sub> PO <sub>4</sub>                | 885.4789               | y <sub>8</sub>                                  | 1383.7049 | y <sub>13</sub> -H <sub>3</sub> PO <sub>4</sub> |
| 272.1717               | y <sub>2</sub>                                               | 492.2582 <sup>+2</sup> | b <sub>9</sub> -H <sub>3</sub> PO <sub>4</sub> <sup>+2</sup> | 656.8375 <sup>+2</sup> | y <sub>12</sub> -H <sub>3</sub> PO <sub>4</sub> <sup>+2</sup> | 967.4431               | b <sub>8</sub>                                  | 1410.6447 | y <sub>12</sub>                                 |
| 279.1557 <sup>+2</sup> | y <sub>5</sub> <sup>+2</sup>                                 | 500.2645 <sup>+2</sup> | y <sub>9</sub> <sup>+2</sup>                                 | 671.3471               | y <sub>6</sub>                                                | 983.5091               | b <sub>9</sub> -H <sub>3</sub> PO <sub>4</sub>  | 1463.6712 | b <sub>13</sub>                                 |
| 320.1378 <sup>+2</sup> | b <sub>5</sub> <sup>+2</sup>                                 | 526.1843               | b <sub>4</sub>                                               | 683.3508 <sup>+2</sup> | b <sub>13</sub> -H <sub>3</sub> PO <sub>4</sub> <sup>+2</sup> | 999.5218               | y <sub>9</sub>                                  | 1481.6818 | y <sub>13</sub>                                 |
| 328.1709 <sup>+2</sup> | b <sub>6</sub> -H <sub>3</sub> PO <sub>4</sub> <sup>+2</sup> | 541.2466 <sup>+2</sup> | b <sub>9</sub> <sup>+2</sup>                                 | 683.8129 <sup>+2</sup> | b <sub>12</sub> <sup>+2</sup>                                 | 1081.486               | b <sub>9</sub>                                  | 1539.806  | MH-H <sub>3</sub> PO <sub>4</sub>               |
| 336.1772 <sup>+2</sup> | y <sub>6</sub> <sup>+2</sup>                                 | 541.2915               | b <sub>5</sub> -H <sub>3</sub> PO <sub>4</sub>               | 692.3561 <sup>+2</sup> | y <sub>13</sub> -H <sub>3</sub> PO <sub>4</sub> <sup>+2</sup> | 1082.5775              | b <sub>10</sub> -H <sub>3</sub> PO <sub>4</sub> | 1637.7829 | MH                                              |

MS/MS Fragmentation of RDsLASLFPSEEEER  
 Found in IPI00478456, Isoform 1 of Kinesin light chain 3

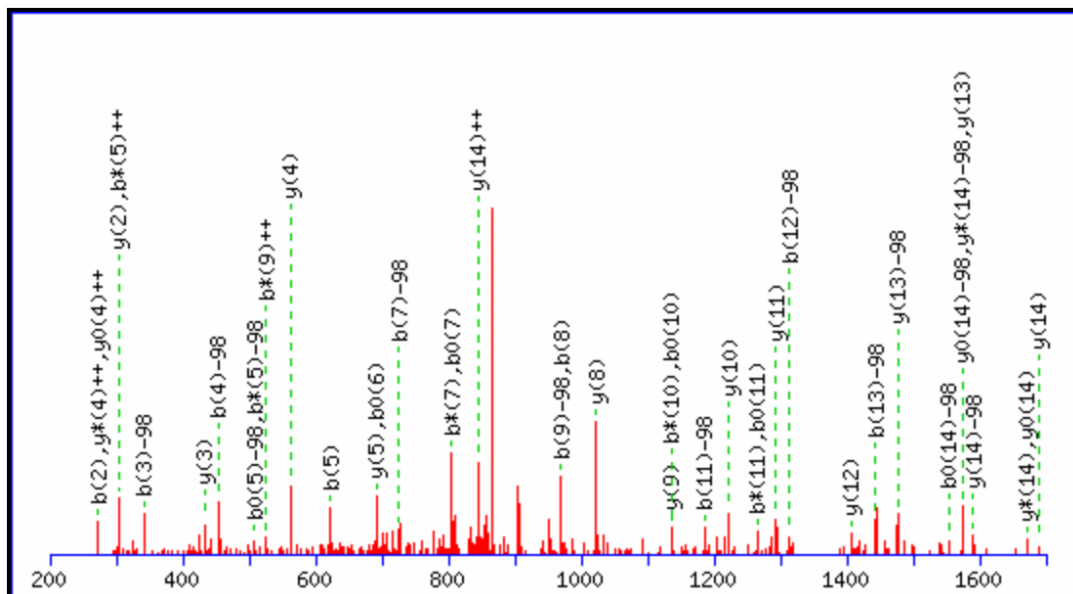

|                        |                                                              |                        |                                                               |                        |                                                               |                        |                                                               |           |                                                 |
|------------------------|--------------------------------------------------------------|------------------------|---------------------------------------------------------------|------------------------|---------------------------------------------------------------|------------------------|---------------------------------------------------------------|-----------|-------------------------------------------------|
| 88.0631 <sup>+2</sup>  | y <sub>1</sub> <sup>+2</sup>                                 | 363.2007 <sup>+2</sup> | b <sub>7</sub> -H <sub>3</sub> PO <sub>4</sub> <sup>+2</sup>  | 593.2986 <sup>+2</sup> | b <sub>11</sub> -H <sub>3</sub> PO <sub>4</sub> <sup>+2</sup> | 795.8677 <sup>+2</sup> | y <sub>14</sub> -H <sub>3</sub> PO <sub>4</sub> <sup>+2</sup> | 1293.5957 | y <sub>11</sub>                                 |
| 136.5713 <sup>+2</sup> | b <sub>2</sub> <sup>+2</sup>                                 | 389.6643 <sup>+2</sup> | y <sub>6</sub> <sup>+2</sup>                                  | 611.7829 <sup>+2</sup> | y <sub>10</sub> <sup>+2</sup>                                 | 823.371                | b <sub>7</sub>                                                | 1314.6325 | b <sub>12</sub> -H <sub>3</sub> PO <sub>4</sub> |
| 152.5844 <sup>+2</sup> | y <sub>2</sub> <sup>+2</sup>                                 | 412.1891 <sup>+2</sup> | b <sub>7</sub> <sup>+2</sup>                                  | 612.31                 | b <sub>6</sub> -H <sub>3</sub> PO <sub>4</sub>                | 835.8509 <sup>+2</sup> | b <sub>14</sub> <sup>+2</sup>                                 | 1406.6798 | y <sub>12</sub>                                 |
| 171.0820 <sup>+2</sup> | b <sub>3</sub> -H <sub>3</sub> PO <sub>4</sub> <sup>+2</sup> | 433.2041               | y <sub>3</sub>                                                | 623.2549               | b <sub>5</sub>                                                | 844.8562 <sup>+2</sup> | y <sub>14</sub> <sup>+2</sup>                                 | 1412.6094 | b <sub>12</sub>                                 |
| 175.119                | y <sub>1</sub>                                               | 436.7349 <sup>+2</sup> | b <sub>8</sub> -H <sub>3</sub> PO <sub>4</sub> <sup>+2</sup>  | 642.2870 <sup>+2</sup> | b <sub>11</sub> <sup>+2</sup>                                 | 872.4625               | b <sub>8</sub> -H <sub>3</sub> PO <sub>4</sub>                | 1443.675  | b <sub>13</sub> -H <sub>3</sub> PO <sub>4</sub> |
| 217.1057 <sup>+2</sup> | y <sub>3</sub> <sup>+2</sup>                                 | 438.1907 <sup>+2</sup> | y <sub>7</sub> <sup>+2</sup>                                  | 647.3015 <sup>+2</sup> | y <sub>11</sub> <sup>+2</sup>                                 | 873.9183 <sup>+2</sup> | MH-H <sub>3</sub> PO <sub>4</sub> <sup>+2</sup>               | 1475.7013 | y <sub>13</sub> -H <sub>3</sub> PO <sub>4</sub> |
| 220.0705 <sup>+2</sup> | b <sub>3</sub> <sup>+2</sup>                                 | 439.1337               | b <sub>3</sub>                                                | 657.8199 <sup>+2</sup> | b <sub>12</sub> -H <sub>3</sub> PO <sub>4</sub> <sup>+2</sup> | 875.3741               | y <sub>7</sub>                                                | 1541.6519 | b <sub>13</sub>                                 |
| 227.6241 <sup>+2</sup> | b <sub>4</sub> -H <sub>3</sub> PO <sub>4</sub> <sup>+2</sup> | 454.2409               | b <sub>4</sub> -H <sub>3</sub> PO <sub>4</sub>                | 691.2893               | y <sub>5</sub>                                                | 922.9067 <sup>+2</sup> | MH <sup>+2</sup>                                              | 1572.7176 | b <sub>14</sub> -H <sub>3</sub> PO <sub>4</sub> |
| 263.1426 <sup>+2</sup> | b <sub>5</sub> -H <sub>3</sub> PO <sub>4</sub> <sup>+2</sup> | 485.2613 <sup>+2</sup> | b <sub>9</sub> -H <sub>3</sub> PO <sub>4</sub> <sup>+2</sup>  | 703.8435 <sup>+2</sup> | y <sub>12</sub> <sup>+2</sup>                                 | 969.5152               | b <sub>9</sub> -H <sub>3</sub> PO <sub>4</sub>                | 1573.6782 | y <sub>13</sub>                                 |
| 272.1353               | b <sub>2</sub>                                               | 485.7233 <sup>+2</sup> | b <sub>8</sub> <sup>+2</sup>                                  | 706.8083 <sup>+2</sup> | b <sub>12</sub> <sup>+2</sup>                                 | 970.4394               | b <sub>8</sub>                                                | 1590.7282 | y <sub>14</sub> -H <sub>3</sub> PO <sub>4</sub> |
| 276.6125 <sup>+2</sup> | b <sub>4</sub> <sup>+2</sup>                                 | 511.7249 <sup>+2</sup> | y <sub>8</sub> <sup>+2</sup>                                  | 710.2869               | b <sub>6</sub>                                                | 1022.4425              | y <sub>8</sub>                                                | 1670.6945 | b <sub>14</sub>                                 |
| 281.6270 <sup>+2</sup> | y <sub>4</sub> <sup>+2</sup>                                 | 525.278                | b <sub>5</sub> -H <sub>3</sub> PO <sub>4</sub>                | 722.3412 <sup>+2</sup> | b <sub>13</sub> -H <sub>3</sub> PO <sub>4</sub> <sup>+2</sup> | 1056.5473              | b <sub>10</sub> -H <sub>3</sub> PO <sub>4</sub>               | 1688.7051 | y <sub>14</sub>                                 |
| 304.1615               | y <sub>2</sub>                                               | 528.7773 <sup>+2</sup> | b <sub>10</sub> -H <sub>3</sub> PO <sub>4</sub> <sup>+2</sup> | 725.3941               | b <sub>7</sub> -H <sub>3</sub> PO <sub>4</sub>                | 1067.4921              | b <sub>9</sub>                                                | 1746.8293 | MH-H <sub>3</sub> PO <sub>4</sub>               |
| 306.6586 <sup>+2</sup> | b <sub>6</sub> -H <sub>3</sub> PO <sub>4</sub> <sup>+2</sup> | 534.2497 <sup>+2</sup> | b <sub>9</sub> <sup>+2</sup>                                  | 738.3543 <sup>+2</sup> | y <sub>13</sub> -H <sub>3</sub> PO <sub>4</sub> <sup>+2</sup> | 1135.5266              | y <sub>9</sub>                                                | 1844.8062 | MH                                              |
| 312.1311 <sup>+2</sup> | b <sub>5</sub> <sup>+2</sup>                                 | 552.2178               | b <sub>4</sub>                                                | 771.3296 <sup>+2</sup> | b <sub>13</sub> <sup>+2</sup>                                 | 1154.5242              | b <sub>10</sub>                                               |           |                                                 |
| 341.1568               | b <sub>3</sub> -H <sub>3</sub> PO <sub>4</sub>               | 562.2467               | y <sub>4</sub>                                                | 778.3214               | y <sub>6</sub>                                                | 1185.5899              | b <sub>11</sub> -H <sub>3</sub> PO <sub>4</sub>               |           |                                                 |
| 346.1483 <sup>+2</sup> | y <sub>5</sub> <sup>+2</sup>                                 | 568.2669 <sup>+2</sup> | y <sub>9</sub> <sup>+2</sup>                                  | 786.8625 <sup>+2</sup> | b <sub>14</sub> -H <sub>3</sub> PO <sub>4</sub> <sup>+2</sup> | 1222.5586              | y <sub>10</sub>                                               |           |                                                 |
| 355.6471 <sup>+2</sup> | b <sub>6</sub> <sup>+2</sup>                                 | 577.7657 <sup>+2</sup> | b <sub>10</sub> <sup>+2</sup>                                 | 787.3427 <sup>+2</sup> | y <sub>13</sub> <sup>+2</sup>                                 | 1283.5668              | b <sub>11</sub>                                               |           |                                                 |

MS/MS Fragmentation of NLALsRESLVV  
 Found in IPI00328218, Isoform 2 of Lipolysis-stimulated lipoprotein receptor

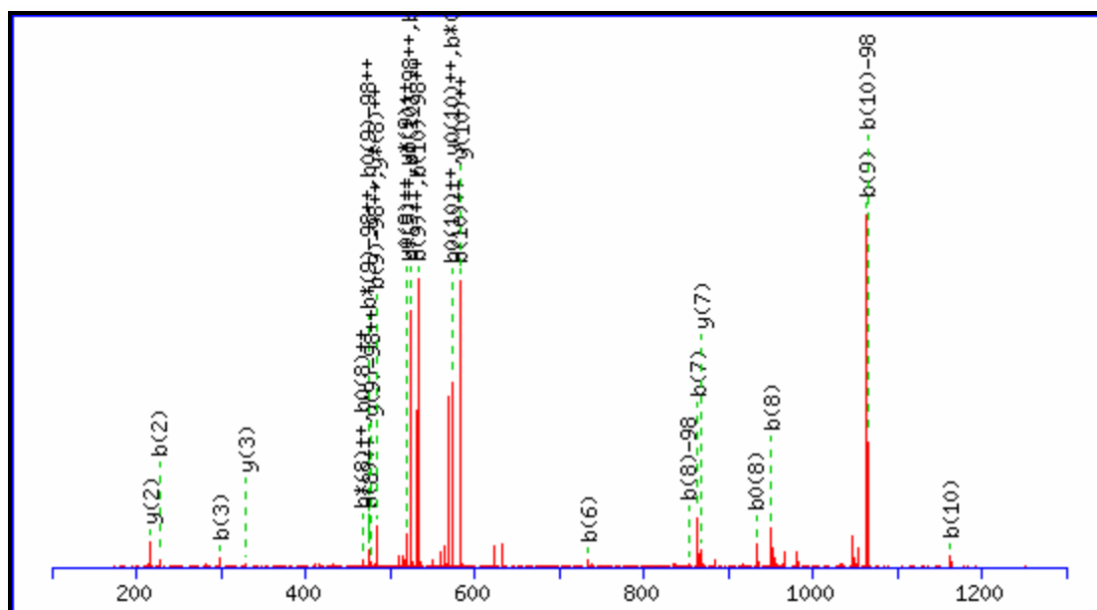

|                 |                    |                 |                    |                 |                       |          |               |           |                  |
|-----------------|--------------------|-----------------|--------------------|-----------------|-----------------------|----------|---------------|-----------|------------------|
| 118.0863        | $y_1$              | 417.2708        | $y_4$              | $532.7604^{+2}$ | $b_9^{+2}$            | 735.3549 | $b_6$         | 1053.534  | $y_9$            |
| 217.1547        | $y_2$              | $427.2300^{+2}$ | $b_8-H_3PO_4^{+2}$ | $533.3062^{+2}$ | $b_{10}-H_3PO_4^{+2}$ | 766.4206 | $b_7-H_3PO_4$ | 1064.5136 | $b_9$            |
| 228.1343        | $b_2$              | $432.7024^{+2}$ | $b_7^{+2}$         | $534.8242^{+2}$ | $y_{10}-H_3PO_4^{+2}$ | 771.4359 | $y_7-H_3PO_4$ | 1065.6051 | $b_{10}-H_3PO_4$ |
| 299.1714        | $b_3$              | $435.2101^{+2}$ | $y_7^{+2}$         | 546.3134        | $y_5$                 | 853.4526 | $b_8-H_3PO_4$ | 1068.6412 | $y_{10}-H_3PO_4$ |
| $319.1926^{+2}$ | $b_6-H_3PO_4^{+2}$ | $442.7636^{+2}$ | $y_8-H_3PO_4^{+2}$ | 579.2538        | $b_5$                 | 864.3975 | $b_7$         | 1163.582  | $b_{10}$         |
| 330.2387        | $y_3$              | $476.2184^{+2}$ | $b_8^{+2}$         | $582.2946^{+2}$ | $b_{10}^{+2}$         | 869.4128 | $y_7$         | 1166.6181 | $y_{10}$         |
| $351.7109^{+2}$ | $y_6^{+2}$         | $478.2822^{+2}$ | $y_9-H_3PO_4^{+2}$ | $583.8127^{+2}$ | $y_{10}^{+2}$         | 884.52   | $y_8-H_3PO_4$ | 1182.6841 | $MH-H_3PO_4$     |
| $368.1811^{+2}$ | $b_6^{+2}$         | 481.2769        | $b_5-H_3PO_4$      | $591.8457^{+2}$ | $MH-H_3PO_4^{+2}$     | 951.4295 | $b_8$         | 1280.661  | $MH$             |
| $383.7139^{+2}$ | $b_7-H_3PO_4^{+2}$ | $483.7720^{+2}$ | $b_9-H_3PO_4^{+2}$ | 637.378         | $b_6-H_3PO_4$         | 955.5571 | $y_9-H_3PO_4$ |           |                  |
| $386.2216^{+2}$ | $y_7-H_3PO_4^{+2}$ | $491.7521^{+2}$ | $y_8^{+2}$         | $640.8341^{+2}$ | $MH^{+2}$             | 966.5367 | $b_9-H_3PO_4$ |           |                  |
| 412.2554        | $b_4$              | $527.2706^{+2}$ | $y_9^{+2}$         | 702.4145        | $y_6$                 | 982.4969 | $y_8$         |           |                  |

MS/MS Fragmentation of GPALTPIRDEEWGGHsPR  
 Found in IPI00328218, Isoform 2 of Lipolysis-stimulated lipoprotein receptor

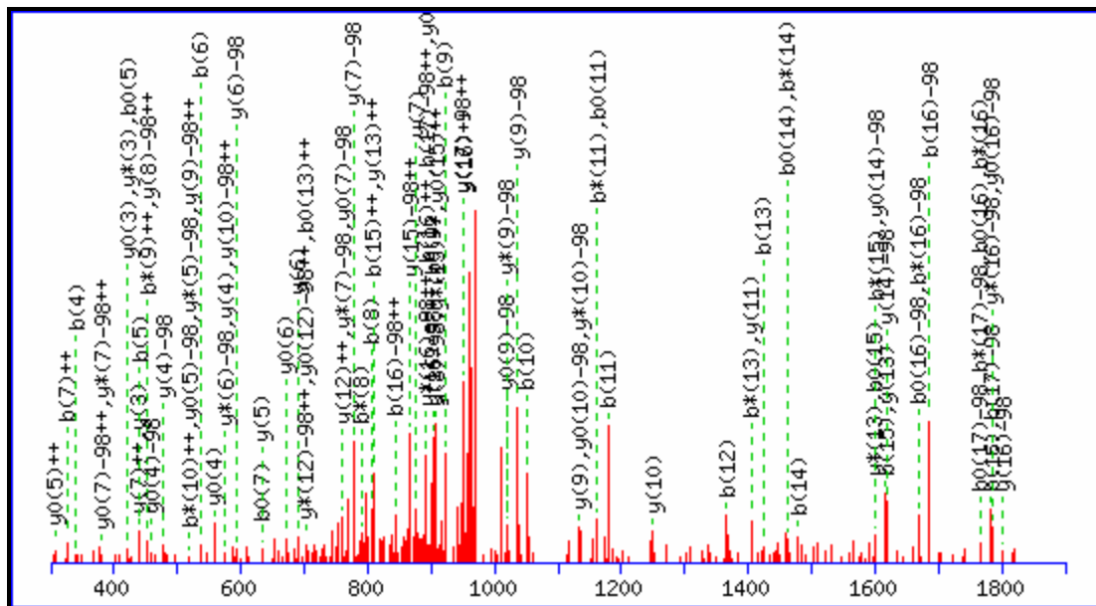

|                        |                                                              |                        |                                                               |                        |                                                               |                         |                                                               |           |                                                 |
|------------------------|--------------------------------------------------------------|------------------------|---------------------------------------------------------------|------------------------|---------------------------------------------------------------|-------------------------|---------------------------------------------------------------|-----------|-------------------------------------------------|
| 88.0631 <sup>+2</sup>  | y <sub>1</sub> <sup>+2</sup>                                 | 440.2504               | b <sub>5</sub>                                                | 703.2859 <sup>+2</sup> | y <sub>11</sub> <sup>+2</sup>                                 | 921.5152                | b <sub>9</sub>                                                | 1517.7244 | y <sub>13</sub> -H <sub>3</sub> PO <sub>4</sub> |
| 136.5895 <sup>+2</sup> | y <sub>2</sub> <sup>+2</sup>                                 | 454.2121 <sup>+2</sup> | y <sub>8</sub> -H <sub>3</sub> PO <sub>4</sub> <sup>+2</sup>  | 710.8395 <sup>+2</sup> | y <sub>12</sub> -H <sub>3</sub> PO <sub>4</sub> <sup>+2</sup> | 940.9200 <sup>+2</sup>  | b <sub>17</sub> <sup>+2</sup>                                 | 1518.6485 | y <sub>12</sub>                                 |
| 155.0815               | b <sub>2</sub>                                               | 461.2613 <sup>+2</sup> | b <sub>9</sub> <sup>+2</sup>                                  | 711.8542 <sup>+2</sup> | b <sub>13</sub> <sup>+2</sup>                                 | 950.4766 <sup>+2</sup>  | y <sub>17</sub> -H <sub>3</sub> PO <sub>4</sub> <sup>+2</sup> | 1615.7013 | y <sub>13</sub>                                 |
| 171.1002 <sup>+2</sup> | y <sub>3</sub> -H <sub>3</sub> PO <sub>4</sub> <sup>+2</sup> | 478.2521               | y <sub>4</sub> -H <sub>3</sub> PO <sub>4</sub>                | 740.3650 <sup>+2</sup> | b <sub>14</sub> <sup>+2</sup>                                 | 950.9387 <sup>+2</sup>  | y <sub>16</sub> <sup>+2</sup>                                 | 1616.7816 | b <sub>15</sub>                                 |
| 175.119                | y <sub>1</sub>                                               | 503.2005 <sup>+2</sup> | y <sub>8</sub> <sup>+2</sup>                                  | 759.3658 <sup>+2</sup> | y <sub>13</sub> -H <sub>3</sub> PO <sub>4</sub> <sup>+2</sup> | 978.9874 <sup>+2</sup>  | MH-H <sub>3</sub> PO <sub>4</sub> <sup>+2</sup>               | 1618.7721 | y <sub>14</sub> -H <sub>3</sub> PO <sub>4</sub> |
| 220.0887 <sup>+2</sup> | y <sub>3</sub> <sup>+2</sup>                                 | 518.7334 <sup>+2</sup> | y <sub>9</sub> -H <sub>3</sub> PO <sub>4</sub> <sup>+2</sup>  | 759.8279 <sup>+2</sup> | y <sub>12</sub> <sup>+2</sup>                                 | 999.4651 <sup>+2</sup>  | y <sub>17</sub> <sup>+2</sup>                                 | 1685.803  | b <sub>16</sub> -H <sub>3</sub> PO <sub>4</sub> |
| 226.1186               | b <sub>3</sub>                                               | 525.7826 <sup>+2</sup> | b <sub>10</sub> <sup>+2</sup>                                 | 778.3743               | y <sub>7</sub> -H <sub>3</sub> PO <sub>4</sub>                | 1005.3938               | y <sub>8</sub>                                                | 1716.749  | y <sub>14</sub>                                 |
| 239.6297 <sup>+2</sup> | y <sub>4</sub> -H <sub>3</sub> PO <sub>4</sub> <sup>+2</sup> | 535.2736               | y <sub>5</sub> -H <sub>3</sub> PO <sub>4</sub>                | 806.4883               | b <sub>8</sub>                                                | 1027.9758 <sup>+2</sup> | MH <sup>+2</sup>                                              | 1731.8561 | y <sub>15</sub> -H <sub>3</sub> PO <sub>4</sub> |
| 268.1404 <sup>+2</sup> | y <sub>5</sub> -H <sub>3</sub> PO <sub>4</sub> <sup>+2</sup> | 537.3031               | b <sub>6</sub>                                                | 808.3543 <sup>+2</sup> | y <sub>13</sub> <sup>+2</sup>                                 | 1036.4595               | y <sub>9</sub> -H <sub>3</sub> PO <sub>4</sub>                | 1782.8558 | b <sub>17</sub> -H <sub>3</sub> PO <sub>4</sub> |
| 272.1717               | y <sub>2</sub>                                               | 567.7218 <sup>+2</sup> | y <sub>9</sub> <sup>+2</sup>                                  | 808.8944 <sup>+2</sup> | b <sub>15</sub> <sup>+2</sup>                                 | 1050.5578               | b <sub>10</sub>                                               | 1783.7799 | b <sub>16</sub>                                 |
| 288.6181 <sup>+2</sup> | y <sub>4</sub> <sup>+2</sup>                                 | 576.229                | y <sub>4</sub>                                                | 809.8897 <sup>+2</sup> | y <sub>14</sub> -H <sub>3</sub> PO <sub>4</sub> <sup>+2</sup> | 1134.4364               | y <sub>9</sub>                                                | 1802.8933 | y <sub>16</sub> -H <sub>3</sub> PO <sub>4</sub> |
| 296.6511 <sup>+2</sup> | y <sub>6</sub> -H <sub>3</sub> PO <sub>4</sub> <sup>+2</sup> | 576.2469 <sup>+2</sup> | y <sub>10</sub> -H <sub>3</sub> PO <sub>4</sub> <sup>+2</sup> | 843.4052 <sup>+2</sup> | b <sub>16</sub> -H <sub>3</sub> PO <sub>4</sub> <sup>+2</sup> | 1151.4865               | y <sub>10</sub> -H <sub>3</sub> PO <sub>4</sub>               | 1829.833  | y <sub>15</sub>                                 |
| 317.1289 <sup>+2</sup> | y <sub>5</sub> <sup>+2</sup>                                 | 590.3039 <sup>+2</sup> | b <sub>11</sub> <sup>+2</sup>                                 | 858.8781 <sup>+2</sup> | y <sub>14</sub> <sup>+2</sup>                                 | 1179.6004               | b <sub>11</sub>                                               | 1880.8327 | b <sub>17</sub>                                 |
| 339.2027               | b <sub>4</sub>                                               | 592.295                | y <sub>6</sub> -H <sub>3</sub> PO <sub>4</sub>                | 866.4317 <sup>+2</sup> | y <sub>15</sub> -H <sub>3</sub> PO <sub>4</sub> <sup>+2</sup> | 1249.4634               | y <sub>10</sub>                                               | 1899.946  | y <sub>17</sub> -H <sub>3</sub> PO <sub>4</sub> |
| 341.1932               | y <sub>3</sub> -H <sub>3</sub> PO <sub>4</sub>               | 625.2353 <sup>+2</sup> | y <sub>10</sub> <sup>+2</sup>                                 | 876.3512               | y <sub>7</sub>                                                | 1307.5876               | y <sub>11</sub> -H <sub>3</sub> PO <sub>4</sub>               | 1900.8702 | y <sub>16</sub>                                 |
| 345.6396 <sup>+2</sup> | y <sub>6</sub> <sup>+2</sup>                                 | 633.2505               | y <sub>5</sub>                                                | 891.9315 <sup>+2</sup> | b <sub>17</sub> -H <sub>3</sub> PO <sub>4</sub> <sup>+2</sup> | 1365.6797               | b <sub>12</sub>                                               | 1956.9675 | MH-H <sub>3</sub> PO <sub>4</sub>               |
| 389.6908 <sup>+2</sup> | y <sub>7</sub> -H <sub>3</sub> PO <sub>4</sub> <sup>+2</sup> | 650.3872               | b <sub>7</sub>                                                | 892.3936 <sup>+2</sup> | b <sub>16</sub> <sup>+2</sup>                                 | 1405.5645               | y <sub>11</sub>                                               | 1997.9229 | y <sub>17</sub>                                 |
| 403.7478 <sup>+2</sup> | b <sub>8</sub> <sup>+2</sup>                                 | 654.2974 <sup>+2</sup> | y <sub>11</sub> -H <sub>3</sub> PO <sub>4</sub> <sup>+2</sup> | 901.9503 <sup>+2</sup> | y <sub>16</sub> -H <sub>3</sub> PO <sub>4</sub> <sup>+2</sup> | 1420.6716               | y <sub>12</sub> -H <sub>3</sub> PO <sub>4</sub>               | 2054.9444 | MH                                              |
| 438.6793 <sup>+2</sup> | y <sub>7</sub> <sup>+2</sup>                                 | 683.3435 <sup>+2</sup> | b <sub>12</sub> <sup>+2</sup>                                 | 907.4169               | y <sub>8</sub> -H <sub>3</sub> PO <sub>4</sub>                | 1422.7012               | b <sub>13</sub>                                               |           |                                                 |
| 439.1701               | y <sub>3</sub>                                               | 690.2719               | y <sub>6</sub>                                                | 915.4202 <sup>+2</sup> | y <sub>15</sub> <sup>+2</sup>                                 | 1479.7227               | b <sub>14</sub>                                               |           |                                                 |

MS/MS Fragmentation of ARsVDALDDLTPPSTAESGSR  
 Found in IPI00328218, Isoform 2 of Lipolysis-stimulated lipoprotein receptor

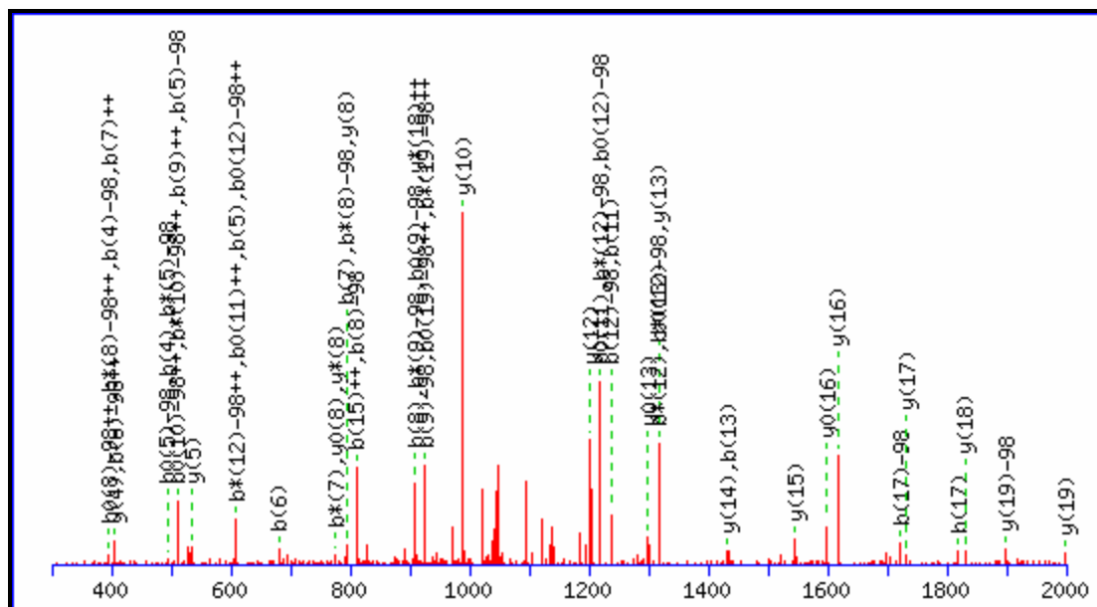

|                        |                                                              |                        |                                                               |                        |                                                               |                         |                                                               |           |                                                 |
|------------------------|--------------------------------------------------------------|------------------------|---------------------------------------------------------------|------------------------|---------------------------------------------------------------|-------------------------|---------------------------------------------------------------|-----------|-------------------------------------------------|
| 88.0631 <sup>+2</sup>  | y <sub>1</sub> <sup>+2</sup>                                 | 397.6856 <sup>+2</sup> | y <sub>8</sub> <sup>+2</sup>                                  | 695.3835               | b <sub>7</sub> -H <sub>3</sub> PO <sub>4</sub>                | 953.9251 <sup>+2</sup>  | b <sub>18</sub> <sup>+2</sup>                                 | 1521.7544 | b <sub>15</sub> -H <sub>3</sub> PO <sub>4</sub> |
| 114.5764 <sup>+2</sup> | b <sub>2</sub> <sup>+2</sup>                                 | 405.7089 <sup>+2</sup> | b <sub>8</sub> -H <sub>3</sub> PO <sub>4</sub> <sup>+2</sup>  | 707.3319               | y <sub>7</sub>                                                | 976.9634 <sup>+2</sup>  | b <sub>20</sub> -H <sub>3</sub> PO <sub>4</sub> <sup>+2</sup> | 1545.7391 | y <sub>15</sub>                                 |
| 131.5791 <sup>+2</sup> | y <sub>2</sub> <sup>+2</sup>                                 | 406.2045               | y <sub>4</sub>                                                | 710.8570 <sup>+2</sup> | b <sub>14</sub> -H <sub>3</sub> PO <sub>4</sub> <sup>+2</sup> | 982.4359 <sup>+2</sup>  | b <sub>19</sub> <sup>+2</sup>                                 | 1592.7915 | b <sub>16</sub> -H <sub>3</sub> PO <sub>4</sub> |
| 149.0871 <sup>+2</sup> | b <sub>3</sub> -H <sub>3</sub> PO <sub>4</sub> <sup>+2</sup> | 446.2120 <sup>+2</sup> | y <sub>9</sub> <sup>+2</sup>                                  | 716.3294 <sup>+2</sup> | b <sub>13</sub> <sup>+2</sup>                                 | 988.4694                | y <sub>10</sub>                                               | 1616.7762 | y <sub>16</sub>                                 |
| 160.0899 <sup>+2</sup> | y <sub>3</sub> <sup>+2</sup>                                 | 454.6973 <sup>+2</sup> | b <sub>8</sub> <sup>+2</sup>                                  | 716.8312 <sup>+2</sup> | y <sub>14</sub> <sup>+2</sup>                                 | 999.4386 <sup>+2</sup>  | y <sub>19</sub> <sup>+2</sup>                                 | 1619.7313 | b <sub>15</sub>                                 |
| 175.119                | y <sub>1</sub>                                               | 463.2223 <sup>+2</sup> | b <sub>9</sub> -H <sub>3</sub> PO <sub>4</sub> <sup>+2</sup>  | 759.8454 <sup>+2</sup> | b <sub>14</sub> <sup>+2</sup>                                 | 1023.4143               | b <sub>9</sub>                                                | 1690.7684 | b <sub>16</sub>                                 |
| 198.0756 <sup>+2</sup> | b <sub>3</sub> <sup>+2</sup>                                 | 494.2123               | b <sub>4</sub>                                                | 761.3808 <sup>+2</sup> | b <sub>15</sub> -H <sub>3</sub> PO <sub>4</sub> <sup>+2</sup> | 1025.9519 <sup>+2</sup> | b <sub>20</sub> <sup>+2</sup>                                 | 1721.8341 | b <sub>17</sub> -H <sub>3</sub> PO <sub>4</sub> |
| 198.6213 <sup>+2</sup> | b <sub>4</sub> -H <sub>3</sub> PO <sub>4</sub> <sup>+2</sup> | 494.7383 <sup>+2</sup> | y <sub>10</sub> <sup>+2</sup>                                 | 773.3732 <sup>+2</sup> | y <sub>15</sub> <sup>+2</sup>                                 | 1028.5007 <sup>+2</sup> | y <sub>20</sub> -H <sub>3</sub> PO <sub>4</sub> <sup>+2</sup> | 1731.8032 | y <sub>17</sub>                                 |
| 203.6059 <sup>+2</sup> | y <sub>4</sub> <sup>+2</sup>                                 | 511.2623               | b <sub>5</sub> -H <sub>3</sub> PO <sub>4</sub>                | 793.3604               | b <sub>7</sub>                                                | 1038.5214               | b <sub>10</sub> -H <sub>3</sub> PO <sub>4</sub>               | 1808.8661 | b <sub>18</sub> -H <sub>3</sub> PO <sub>4</sub> |
| 228.1455               | b <sub>2</sub>                                               | 512.2108 <sup>+2</sup> | b <sub>9</sub> <sup>+2</sup>                                  | 794.3639               | y <sub>8</sub>                                                | 1064.0193 <sup>+2</sup> | MH-H <sub>3</sub> PO <sub>4</sub> <sup>+2</sup>               | 1819.811  | b <sub>17</sub>                                 |
| 247.6098 <sup>+2</sup> | b <sub>4</sub> <sup>+2</sup>                                 | 519.7644 <sup>+2</sup> | b <sub>10</sub> -H <sub>3</sub> PO <sub>4</sub> <sup>+2</sup> | 796.8994 <sup>+2</sup> | b <sub>16</sub> -H <sub>3</sub> PO <sub>4</sub> <sup>+2</sup> | 1077.4892 <sup>+2</sup> | y <sub>20</sub> <sup>+2</sup>                                 | 1830.8716 | y <sub>18</sub>                                 |
| 256.1348 <sup>+2</sup> | b <sub>5</sub> -H <sub>3</sub> PO <sub>4</sub> <sup>+2</sup> | 535.2471               | y <sub>5</sub>                                                | 808.8917 <sup>+2</sup> | y <sub>16</sub> <sup>+2</sup>                                 | 1089.5171               | y <sub>11</sub>                                               | 1865.8876 | b <sub>19</sub> -H <sub>3</sub> PO <sub>4</sub> |
| 262.151                | y <sub>2</sub>                                               | 545.2622 <sup>+2</sup> | y <sub>11</sub> <sup>+2</sup>                                 | 810.3693 <sup>+2</sup> | b <sub>15</sub> <sup>+2</sup>                                 | 1113.0077 <sup>+2</sup> | MH <sup>+2</sup>                                              | 1899.893  | y <sub>19</sub> -H <sub>3</sub> PO <sub>4</sub> |
| 268.1272 <sup>+2</sup> | y <sub>5</sub> <sup>+2</sup>                                 | 568.7528 <sup>+2</sup> | b <sub>10</sub> <sup>+2</sup>                                 | 810.4104               | b <sub>8</sub> -H <sub>3</sub> PO <sub>4</sub>                | 1136.4983               | b <sub>10</sub>                                               | 1906.843  | b <sub>18</sub>                                 |
| 291.6534 <sup>+2</sup> | b <sub>6</sub> -H <sub>3</sub> PO <sub>4</sub> <sup>+2</sup> | 570.2882 <sup>+2</sup> | b <sub>11</sub> -H <sub>3</sub> PO <sub>4</sub> <sup>+2</sup> | 845.8878 <sup>+2</sup> | b <sub>16</sub> <sup>+2</sup>                                 | 1139.5691               | b <sub>11</sub> -H <sub>3</sub> PO <sub>4</sub>               | 1952.9196 | b <sub>20</sub> -H <sub>3</sub> PO <sub>4</sub> |
| 297.167                | b <sub>3</sub> -H <sub>3</sub> PO <sub>4</sub>               | 582.2994               | b <sub>6</sub> -H <sub>3</sub> PO <sub>4</sub>                | 861.4207 <sup>+2</sup> | b <sub>17</sub> -H <sub>3</sub> PO <sub>4</sub> <sup>+2</sup> | 1202.6012               | y <sub>12</sub>                                               | 1963.8645 | b <sub>19</sub>                                 |
| 303.6457 <sup>+2</sup> | y <sub>6</sub> <sup>+2</sup>                                 | 601.8042 <sup>+2</sup> | y <sub>12</sub> <sup>+2</sup>                                 | 866.4052 <sup>+2</sup> | y <sub>17</sub> <sup>+2</sup>                                 | 1236.6219               | b <sub>12</sub> -H <sub>3</sub> PO <sub>4</sub>               | 1997.8699 | y <sub>19</sub>                                 |
| 305.1232 <sup>+2</sup> | b <sub>5</sub> <sup>+2</sup>                                 | 606.2842               | y <sub>6</sub>                                                | 891.4167               | y <sub>9</sub>                                                | 1237.546                | b <sub>11</sub>                                               | 2050.8965 | b <sub>20</sub>                                 |
| 319.1724               | y <sub>3</sub>                                               | 609.2392               | b <sub>5</sub>                                                | 904.9367 <sup>+2</sup> | b <sub>18</sub> -H <sub>3</sub> PO <sub>4</sub> <sup>+2</sup> | 1317.6281               | y <sub>13</sub>                                               | 2055.9942 | y <sub>20</sub> -H <sub>3</sub> PO <sub>4</sub> |
| 340.6418 <sup>+2</sup> | b <sub>6</sub> <sup>+2</sup>                                 | 618.8146 <sup>+2</sup> | b <sub>12</sub> -H <sub>3</sub> PO <sub>4</sub> <sup>+2</sup> | 908.3873               | b <sub>8</sub>                                                | 1333.6747               | b <sub>13</sub> -H <sub>3</sub> PO <sub>4</sub>               | 2127.0313 | MH-H <sub>3</sub> PO <sub>4</sub>               |
| 348.1954 <sup>+2</sup> | b <sub>7</sub> -H <sub>3</sub> PO <sub>4</sub> <sup>+2</sup> | 619.2766 <sup>+2</sup> | b <sub>11</sub> <sup>+2</sup>                                 | 910.4091 <sup>+2</sup> | b <sub>17</sub> <sup>+2</sup>                                 | 1334.5988               | b <sub>12</sub>                                               | 2153.971  | y <sub>20</sub>                                 |
| 354.1696 <sup>+2</sup> | y <sub>7</sub> <sup>+2</sup>                                 | 659.3177 <sup>+2</sup> | y <sub>13</sub> <sup>+2</sup>                                 | 915.9394 <sup>+2</sup> | y <sub>18</sub> <sup>+2</sup>                                 | 1420.7067               | b <sub>14</sub> -H <sub>3</sub> PO <sub>4</sub>               | 2225.0082 | MH                                              |
| 395.1439               | b <sub>3</sub>                                               | 667.3410 <sup>+2</sup> | b <sub>13</sub> -H <sub>3</sub> PO <sub>4</sub> <sup>+2</sup> | 925.4374               | b <sub>9</sub> -H <sub>3</sub> PO <sub>4</sub>                | 1431.6516               | b <sub>13</sub>                                               |           |                                                 |
| 396.2354               | b <sub>4</sub> -H <sub>3</sub> PO <sub>4</sub>               | 667.8030 <sup>+2</sup> | b <sub>12</sub> <sup>+2</sup>                                 | 933.4474 <sup>+2</sup> | b <sub>19</sub> -H <sub>3</sub> PO <sub>4</sub> <sup>+2</sup> | 1432.655                | y <sub>14</sub>                                               |           |                                                 |
| 397.1838 <sup>+2</sup> | b <sub>7</sub> <sup>+2</sup>                                 | 680.2763               | b <sub>6</sub>                                                | 950.4502 <sup>+2</sup> | y <sub>19</sub> -H <sub>3</sub> PO <sub>4</sub> <sup>+2</sup> | 1518.6836               | b <sub>14</sub>                                               |           |                                                 |



MS/MS Fragmentation of ELANFDPsRPGPPsGRVER  
Found in IPI00328218, Isoform 2 of Lipolysis-stimulated lipoprotein receptor

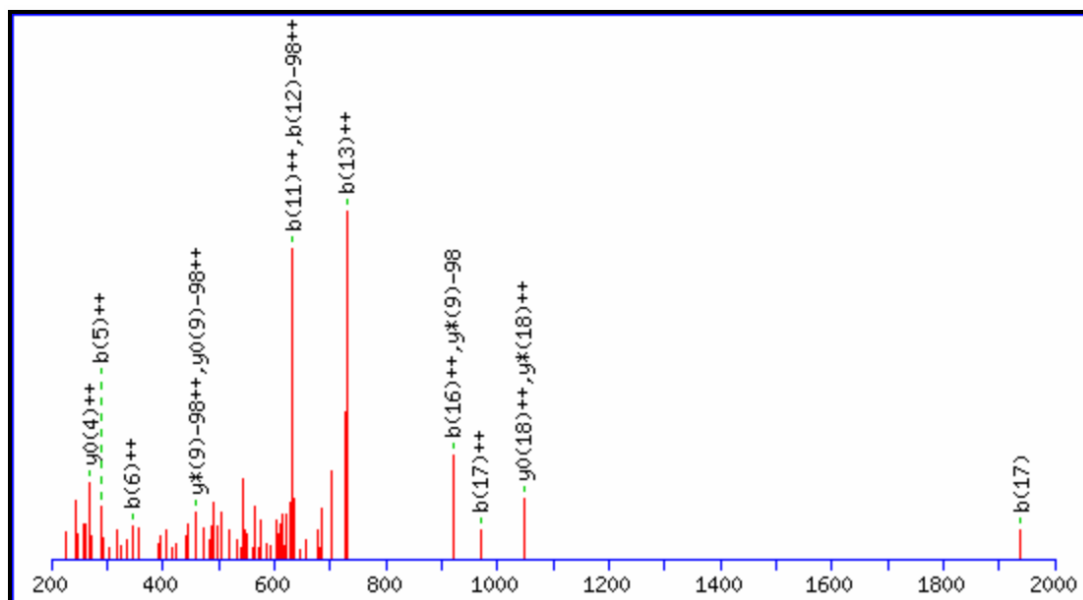

|                        |                                                               |                        |                                                                |                         |                                                                |                         |                                                  |           |                                                  |
|------------------------|---------------------------------------------------------------|------------------------|----------------------------------------------------------------|-------------------------|----------------------------------------------------------------|-------------------------|--------------------------------------------------|-----------|--------------------------------------------------|
| 88.0631 <sup>+2</sup>  | y <sub>1</sub> <sup>+2</sup>                                  | 604.2608 <sup>+2</sup> | b <sub>10</sub> <sup>+2</sup>                                  | 833.8586 <sup>+2</sup>  | y <sub>14</sub> <sup>+2</sup>                                  | 1034.4779               | y <sub>9</sub>                                   | 1617.8244 | y <sub>15</sub> -2H <sub>3</sub> PO <sub>4</sub> |
| 152.5844 <sup>+2</sup> | y <sub>2</sub> <sup>+2</sup>                                  | 616.3525               | y <sub>5</sub>                                                 | 841.8342 <sup>+2</sup>  | b <sub>15</sub> <sup>+2</sup>                                  | 1056.4748 <sup>+2</sup> | y <sub>18</sub> <sup>+2</sup>                    | 1625.6397 | b <sub>14</sub>                                  |
| 175.119                | y <sub>1</sub>                                                | 629.8418 <sup>+2</sup> | y <sub>12</sub> -2H <sub>3</sub> PO <sub>4</sub> <sup>+2</sup> | 856.3836                | b <sub>8</sub> -H <sub>3</sub> PO <sub>4</sub>                 | 1072.0077 <sup>+2</sup> | MH-H <sub>3</sub> PO <sub>4</sub> <sup>+2</sup>  | 1642.8085 | b <sub>16</sub> -2H <sub>3</sub> PO <sub>4</sub> |
| 202.1186 <sup>+2</sup> | y <sub>3</sub> <sup>+2</sup>                                  | 632.3095 <sup>+2</sup> | b <sub>12</sub> -H <sub>3</sub> PO <sub>4</sub> <sup>+2</sup>  | 858.4043 <sup>+2</sup>  | y <sub>15</sub> -H <sub>3</sub> PO <sub>4</sub> <sup>+2</sup>  | 1109.5374               | b <sub>10</sub> -H <sub>3</sub> PO <sub>4</sub>  | 1666.7098 | y <sub>14</sub>                                  |
| 243.1339               | b <sub>2</sub>                                                | 632.7715 <sup>+2</sup> | b <sub>11</sub> <sup>+2</sup>                                  | 866.4373 <sup>+2</sup>  | y <sub>16</sub> -2H <sub>3</sub> PO <sub>4</sub> <sup>+2</sup> | 1110.4616               | b <sub>9</sub>                                   | 1682.6611 | b <sub>15</sub>                                  |
| 280.1692 <sup>+2</sup> | y <sub>4</sub> <sup>+2</sup>                                  | 644.3195 <sup>+2</sup> | y <sub>11</sub> <sup>+2</sup>                                  | 870.8963 <sup>+2</sup>  | b <sub>16</sub> -H <sub>3</sub> PO <sub>4</sub> <sup>+2</sup>  | 1120.9961 <sup>+2</sup> | MH <sup>+2</sup>                                 | 1715.8013 | y <sub>15</sub> -2H <sub>3</sub> PO <sub>4</sub> |
| 304.1615               | y <sub>2</sub>                                                | 678.3682 <sup>+2</sup> | y <sub>13</sub> -2H <sub>3</sub> PO <sub>4</sub> <sup>+2</sup> | 871.4421 <sup>+2</sup>  | b <sub>17</sub> -2H <sub>3</sub> PO <sub>4</sub> <sup>+2</sup> | 1131.5306               | y <sub>10</sub>                                  | 1731.8674 | y <sub>16</sub> -2H <sub>3</sub> PO <sub>4</sub> |
| 308.6799 <sup>+2</sup> | y <sub>5</sub> <sup>+2</sup>                                  | 678.8302 <sup>+2</sup> | y <sub>12</sub> -H <sub>3</sub> PO <sub>4</sub> <sup>+2</sup>  | 879.4795                | y <sub>8</sub> -H <sub>3</sub> PO <sub>4</sub>                 | 1166.5589               | b <sub>11</sub> -H <sub>3</sub> PO <sub>4</sub>  | 1740.7854 | b <sub>16</sub> -H <sub>3</sub> PO <sub>4</sub>  |
| 314.171                | b <sub>3</sub>                                                | 680.8359 <sup>+2</sup> | b <sub>13</sub> -H <sub>3</sub> PO <sub>4</sub> <sup>+2</sup>  | 880.4037                | y <sub>7</sub>                                                 | 1189.6549               | y <sub>11</sub> -H <sub>3</sub> PO <sub>4</sub>  | 1741.8769 | b <sub>17</sub> -2H <sub>3</sub> PO <sub>4</sub> |
| 343.1906 <sup>+2</sup> | y <sub>6</sub> -H <sub>3</sub> PO <sub>4</sub> <sup>+2</sup>  | 681.2979 <sup>+2</sup> | b <sub>12</sub> <sup>+2</sup>                                  | 901.9559 <sup>+2</sup>  | y <sub>17</sub> -2H <sub>3</sub> PO <sub>4</sub> <sup>+2</sup> | 1207.5143               | b <sub>10</sub>                                  | 1802.9045 | y <sub>17</sub> -2H <sub>3</sub> PO <sub>4</sub> |
| 391.7170 <sup>+2</sup> | y <sub>7</sub> -H <sub>3</sub> PO <sub>4</sub> <sup>+2</sup>  | 685.374                | y <sub>6</sub> -H <sub>3</sub> PO <sub>4</sub>                 | 907.3928 <sup>+2</sup>  | y <sub>15</sub> <sup>+2</sup>                                  | 1258.6763               | y <sub>12</sub> -2H <sub>3</sub> PO <sub>4</sub> | 1813.7782 | y <sub>15</sub>                                  |
| 392.1791 <sup>+2</sup> | y <sub>6</sub> <sup>+2</sup>                                  | 690.3093               | b <sub>6</sub>                                                 | 915.4258 <sup>+2</sup>  | y <sub>16</sub> -H <sub>3</sub> PO <sub>4</sub> <sup>+2</sup>  | 1263.6117               | b <sub>12</sub> -H <sub>3</sub> PO <sub>4</sub>  | 1829.8443 | y <sub>16</sub> -H <sub>3</sub> PO <sub>4</sub>  |
| 403.23                 | y <sub>3</sub>                                                | 715.3466 <sup>+2</sup> | b <sub>14</sub> -2H <sub>3</sub> PO <sub>4</sub> <sup>+2</sup> | 919.8848 <sup>+2</sup>  | b <sub>16</sub> <sup>+2</sup>                                  | 1264.5358               | b <sub>11</sub>                                  | 1838.7623 | b <sub>16</sub>                                  |
| 428.214                | b <sub>4</sub>                                                | 727.3566 <sup>+2</sup> | y <sub>13</sub> -H <sub>3</sub> PO <sub>4</sub> <sup>+2</sup>  | 920.4305 <sup>+2</sup>  | b <sub>17</sub> -H <sub>3</sub> PO <sub>4</sub> <sup>+2</sup>  | 1287.6318               | y <sub>11</sub>                                  | 1839.8538 | b <sub>17</sub> -H <sub>3</sub> PO <sub>4</sub>  |
| 440.2434 <sup>+2</sup> | y <sub>8</sub> -H <sub>3</sub> PO <sub>4</sub> <sup>+2</sup>  | 727.8187 <sup>+2</sup> | y <sub>12</sub> <sup>+2</sup>                                  | 935.9634 <sup>+2</sup>  | b <sub>18</sub> -2H <sub>3</sub> PO <sub>4</sub> <sup>+2</sup> | 1355.7291               | y <sub>13</sub> -2H <sub>3</sub> PO <sub>4</sub> | 1870.9195 | b <sub>18</sub> -2H <sub>3</sub> PO <sub>4</sub> |
| 440.7055 <sup>+2</sup> | y <sub>7</sub> <sup>+2</sup>                                  | 729.8243 <sup>+2</sup> | b <sub>13</sub> <sup>+2</sup>                                  | 936.501                 | y <sub>9</sub> -H <sub>3</sub> PO <sub>4</sub>                 | 1356.6532               | y <sub>12</sub> -H <sub>3</sub> PO <sub>4</sub>  | 1900.8814 | y <sub>17</sub> -H <sub>3</sub> PO <sub>4</sub>  |
| 468.7541 <sup>+2</sup> | y <sub>9</sub> -H <sub>3</sub> PO <sub>4</sub> <sup>+2</sup>  | 735.8817 <sup>+2</sup> | y <sub>14</sub> -2H <sub>3</sub> PO <sub>4</sub> <sup>+2</sup> | 950.9443 <sup>+2</sup>  | y <sub>17</sub> -H <sub>3</sub> PO <sub>4</sub> <sup>+2</sup>  | 1360.6644               | b <sub>13</sub> -H <sub>3</sub> PO <sub>4</sub>  | 1915.9886 | y <sub>18</sub> -2H <sub>3</sub> PO <sub>4</sub> |
| 489.2318 <sup>+2</sup> | y <sub>8</sub> <sup>+2</sup>                                  | 743.8573 <sup>+2</sup> | b <sub>15</sub> -2H <sub>3</sub> PO <sub>4</sub> <sup>+2</sup> | 954.3605                | b <sub>8</sub>                                                 | 1361.5886               | b <sub>12</sub>                                  | 1927.8212 | y <sub>16</sub>                                  |
| 506.7460 <sup>+2</sup> | b <sub>9</sub> -H <sub>3</sub> PO <sub>4</sub> <sup>+2</sup>  | 764.3350 <sup>+2</sup> | b <sub>14</sub> -H <sub>3</sub> PO <sub>4</sub> <sup>+2</sup>  | 958.4979 <sup>+2</sup>  | y <sub>18</sub> -2H <sub>3</sub> PO <sub>4</sub> <sup>+2</sup> | 1429.6859               | b <sub>14</sub> -2H <sub>3</sub> PO <sub>4</sub> | 1937.8307 | b <sub>17</sub>                                  |
| 517.2805 <sup>+2</sup> | y <sub>10</sub> -H <sub>3</sub> PO <sub>4</sub> <sup>+2</sup> | 776.3451 <sup>+2</sup> | y <sub>13</sub> <sup>+2</sup>                                  | 964.4142 <sup>+2</sup>  | y <sub>16</sub> <sup>+2</sup>                                  | 1453.706                | y <sub>13</sub> -H <sub>3</sub> PO <sub>4</sub>  | 1968.8964 | b <sub>18</sub> -H <sub>3</sub> PO <sub>4</sub>  |
| 517.7426 <sup>+2</sup> | y <sub>9</sub> <sup>+2</sup>                                  | 782.4268               | y <sub>7</sub> -H <sub>3</sub> PO <sub>4</sub>                 | 969.4190 <sup>+2</sup>  | b <sub>17</sub> <sup>+2</sup>                                  | 1454.6301               | y <sub>12</sub>                                  | 1998.8583 | y <sub>17</sub>                                  |
| 555.2724 <sup>+2</sup> | b <sub>10</sub> -H <sub>3</sub> PO <sub>4</sub> <sup>+2</sup> | 783.3509               | y <sub>6</sub>                                                 | 977.4564                | y <sub>8</sub>                                                 | 1458.6413               | b <sub>13</sub>                                  | 2013.9654 | y <sub>18</sub> -H <sub>3</sub> PO <sub>4</sub>  |
| 555.7344 <sup>+2</sup> | b <sub>9</sub> <sup>+2</sup>                                  | 784.8701 <sup>+2</sup> | y <sub>14</sub> -H <sub>3</sub> PO <sub>4</sub> <sup>+2</sup>  | 984.9518 <sup>+2</sup>  | b <sub>18</sub> -H <sub>3</sub> PO <sub>4</sub> <sup>+2</sup>  | 1470.756                | y <sub>14</sub> -2H <sub>3</sub> PO <sub>4</sub> | 2066.8733 | b <sub>18</sub>                                  |
| 559.3311               | y <sub>4</sub>                                                | 787.3621               | b <sub>7</sub>                                                 | 999.9328 <sup>+2</sup>  | y <sub>17</sub> <sup>+2</sup>                                  | 1486.7074               | b <sub>15</sub> -2H <sub>3</sub> PO <sub>4</sub> | 2111.9423 | y <sub>18</sub>                                  |
| 566.2690 <sup>+2</sup> | y <sub>10</sub> <sup>+2</sup>                                 | 792.8458 <sup>+2</sup> | b <sub>15</sub> -H <sub>3</sub> PO <sub>4</sub> <sup>+2</sup>  | 1007.4864 <sup>+2</sup> | y <sub>18</sub> -H <sub>3</sub> PO <sub>4</sub> <sup>+2</sup>  | 1527.6628               | b <sub>14</sub> -H <sub>3</sub> PO <sub>4</sub>  | 2143.008  | MH-H <sub>3</sub> PO <sub>4</sub>                |
| 575.2824               | b <sub>5</sub>                                                | 809.4159 <sup>+2</sup> | y <sub>15</sub> -2H <sub>3</sub> PO <sub>4</sub> <sup>+2</sup> | 1012.4847               | b <sub>9</sub> -H <sub>3</sub> PO <sub>4</sub>                 | 1551.6829               | y <sub>13</sub>                                  | 2240.9849 | MH                                               |
| 583.7831 <sup>+2</sup> | b <sub>11</sub> -H <sub>3</sub> PO <sub>4</sub> <sup>+2</sup> | 813.3235 <sup>+2</sup> | b <sub>14</sub> <sup>+2</sup>                                  | 1033.5538               | y <sub>10</sub> -H <sub>3</sub> PO <sub>4</sub>                | 1568.7329               | y <sub>14</sub> -H <sub>3</sub> PO <sub>4</sub>  |           |                                                  |
| 595.3311 <sup>+2</sup> | y <sub>11</sub> -H <sub>3</sub> PO <sub>4</sub> <sup>+2</sup> | 821.9079 <sup>+2</sup> | b <sub>16</sub> -2H <sub>3</sub> PO <sub>4</sub> <sup>+2</sup> | 1033.9403 <sup>+2</sup> | b <sub>18</sub> <sup>+2</sup>                                  | 1584.6842               | b <sub>15</sub> -H <sub>3</sub> PO <sub>4</sub>  |           |                                                  |

MS/MS Fragmentation of GPALTPIRDEEWGGHsPRsPR  
 Found in IPI00328218, Isoform 2 of Lipolysis-stimulated lipoprotein receptor

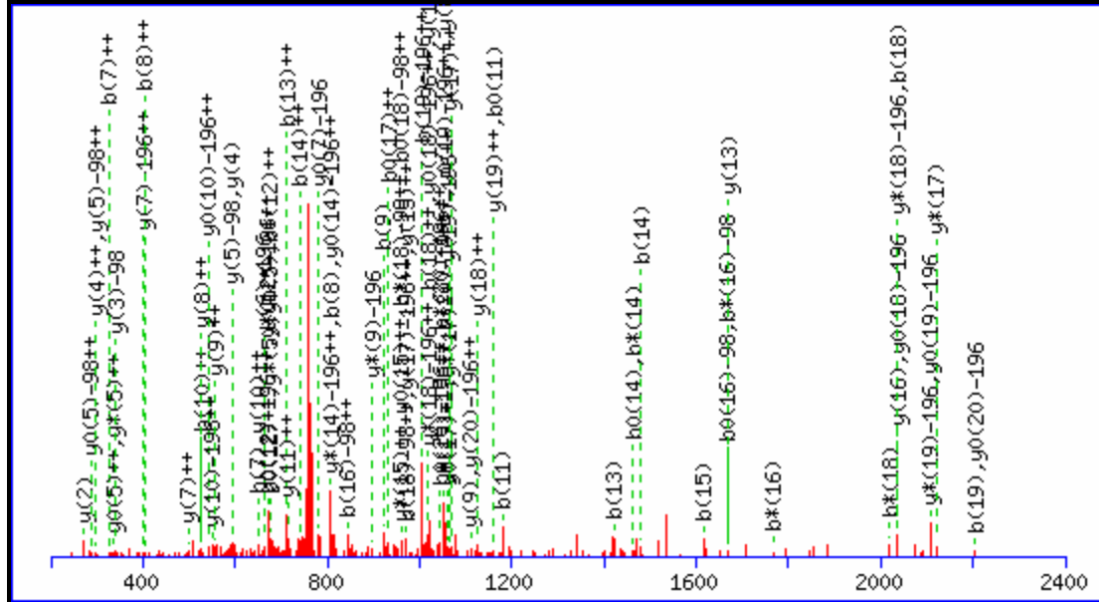

|                        |                                                               |                        |                                                                |                         |                                                                |                         |                                                                |           |                                                  |
|------------------------|---------------------------------------------------------------|------------------------|----------------------------------------------------------------|-------------------------|----------------------------------------------------------------|-------------------------|----------------------------------------------------------------|-----------|--------------------------------------------------|
| 88.0631 <sup>+2</sup>  | y <sub>1</sub> <sup>+2</sup>                                  | 550.7785 <sup>+2</sup> | y <sub>10</sub> -2H <sub>3</sub> PO <sub>4</sub> <sup>+2</sup> | 891.9315 <sup>+2</sup>  | b <sub>17</sub> -H <sub>3</sub> PO <sub>4</sub> <sup>+2</sup>  | 1111.5643 <sup>+2</sup> | y <sub>20</sub> -2H <sub>3</sub> PO <sub>4</sub> <sup>+2</sup> | 1839.8997 | y <sub>16</sub> -2H <sub>3</sub> PO <sub>4</sub> |
| 136.5895 <sup>+2</sup> | y <sub>2</sub> <sup>+2</sup>                                  | 555.7157 <sup>+2</sup> | y <sub>9</sub> <sup>+2</sup>                                   | 892.3936 <sup>+2</sup>  | b <sub>16</sub> <sup>+2</sup>                                  | 1112.0264 <sup>+2</sup> | y <sub>19</sub> -H <sub>3</sub> PO <sub>4</sub> <sup>+2</sup>  | 1840.8239 | y <sub>15</sub> -H <sub>3</sub> PO <sub>4</sub>  |
| 155.0815               | b <sub>2</sub>                                                | 590.3039 <sup>+2</sup> | b <sub>11</sub> <sup>+2</sup>                                  | 898.4043                | y <sub>7</sub> -H <sub>3</sub> PO <sub>4</sub>                 | 1125.4963 <sup>+2</sup> | y <sub>18</sub> <sup>+2</sup>                                  | 1880.8327 | b <sub>17</sub>                                  |
| 171.1002 <sup>+2</sup> | y <sub>3</sub> -H <sub>3</sub> PO <sub>4</sub> <sup>+2</sup>  | 594.3471               | y <sub>5</sub> -H <sub>3</sub> PO <sub>4</sub>                 | 913.3620 <sup>+2</sup>  | y <sub>14</sub> <sup>+2</sup>                                  | 1150.9961 <sup>+2</sup> | b <sub>20</sub> <sup>+2</sup>                                  | 1937.8766 | y <sub>16</sub> -H <sub>3</sub> PO <sub>4</sub>  |
| 175.119                | y <sub>1</sub>                                                | 595.2712               | y <sub>4</sub>                                                 | 914.4704                | y <sub>9</sub> -2H <sub>3</sub> PO <sub>4</sub>                | 1160.5528 <sup>+2</sup> | y <sub>20</sub> -H <sub>3</sub> PO <sub>4</sub> <sup>+2</sup>  | 1938.8008 | y <sub>15</sub>                                  |
| 220.0887 <sup>+2</sup> | y <sub>3</sub> <sup>+2</sup>                                  | 599.7669 <sup>+2</sup> | y <sub>10</sub> -H <sub>3</sub> PO <sub>4</sub> <sup>+2</sup>  | 920.4535 <sup>+2</sup>  | y <sub>16</sub> -2H <sub>3</sub> PO <sub>4</sub> <sup>+2</sup> | 1161.0148 <sup>+2</sup> | y <sub>19</sub> <sup>+2</sup>                                  | 1938.9569 | b <sub>18</sub> -H <sub>3</sub> PO <sub>4</sub>  |
| 226.1186               | b <sub>3</sub>                                                | 615.2998 <sup>+2</sup> | y <sub>11</sub> -2H <sub>3</sub> PO <sub>4</sub> <sup>+2</sup> | 920.9156 <sup>+2</sup>  | y <sub>15</sub> -H <sub>3</sub> PO <sub>4</sub> <sup>+2</sup>  | 1179.6004               | b <sub>11</sub>                                                | 1940.9474 | y <sub>17</sub> -2H <sub>3</sub> PO <sub>4</sub> |
| 249.1508 <sup>+2</sup> | y <sub>4</sub> -H <sub>3</sub> PO <sub>4</sub> <sup>+2</sup>  | 648.7554 <sup>+2</sup> | y <sub>10</sub> <sup>+2</sup>                                  | 921.5152                | b <sub>9</sub>                                                 | 1189.0635 <sup>+2</sup> | MH-H <sub>3</sub> PO <sub>4</sub> <sup>+2</sup>                | 2007.9784 | b <sub>19</sub> -2H <sub>3</sub> PO <sub>4</sub> |
| 272.1717               | y <sub>2</sub>                                                | 650.3872               | b <sub>7</sub>                                                 | 940.9200 <sup>+2</sup>  | b <sub>17</sub> <sup>+2</sup>                                  | 1198.5266               | y <sub>10</sub> -H <sub>3</sub> PO <sub>4</sub>                | 2035.8535 | y <sub>16</sub>                                  |
| 297.6772 <sup>+2</sup> | y <sub>5</sub> -H <sub>3</sub> PO <sub>4</sub> <sup>+2</sup>  | 663.3685               | y <sub>6</sub> -2H <sub>3</sub> PO <sub>4</sub>                | 955.4258                | y <sub>8</sub> -H <sub>3</sub> PO <sub>4</sub>                 | 1209.5412 <sup>+2</sup> | y <sub>20</sub> <sup>+2</sup>                                  | 2036.9338 | b <sub>18</sub>                                  |
| 298.1392 <sup>+2</sup> | y <sub>4</sub> <sup>+2</sup>                                  | 664.2882 <sup>+2</sup> | y <sub>11</sub> -H <sub>3</sub> PO <sub>4</sub> <sup>+2</sup>  | 969.4420 <sup>+2</sup>  | y <sub>16</sub> -H <sub>3</sub> PO <sub>4</sub> <sup>+2</sup>  | 1229.5923               | y <sub>11</sub> -2H <sub>3</sub> PO <sub>4</sub>               | 2038.9243 | y <sub>17</sub> -H <sub>3</sub> PO <sub>4</sub>  |
| 332.1879 <sup>+2</sup> | y <sub>6</sub> -2H <sub>3</sub> PO <sub>4</sub> <sup>+2</sup> | 679.8211 <sup>+2</sup> | y <sub>12</sub> -2H <sub>3</sub> PO <sub>4</sub> <sup>+2</sup> | 969.9040 <sup>+2</sup>  | y <sub>15</sub> <sup>+2</sup>                                  | 1238.0519 <sup>+2</sup> | MH <sup>+2</sup>                                               | 2054.0315 | y <sub>18</sub> -2H <sub>3</sub> PO <sub>4</sub> |
| 339.2027               | b <sub>4</sub>                                                | 683.3435 <sup>+2</sup> | b <sub>12</sub> <sup>+2</sup>                                  | 969.9821 <sup>+2</sup>  | b <sub>18</sub> -H <sub>3</sub> PO <sub>4</sub> <sup>+2</sup>  | 1296.5035               | y <sub>10</sub>                                                | 2105.0311 | b <sub>20</sub> -2H <sub>3</sub> PO <sub>4</sub> |
| 341.1932               | y <sub>3</sub> -H <sub>3</sub> PO <sub>4</sub>                | 692.3239               | y <sub>5</sub>                                                 | 970.9773 <sup>+2</sup>  | y <sub>17</sub> -2H <sub>3</sub> PO <sub>4</sub> <sup>+2</sup> | 1327.5692               | y <sub>11</sub> -H <sub>3</sub> PO <sub>4</sub>                | 2105.9553 | b <sub>19</sub> -H <sub>3</sub> PO <sub>4</sub>  |
| 346.6656 <sup>+2</sup> | y <sub>5</sub> <sup>+2</sup>                                  | 711.8542 <sup>+2</sup> | b <sub>13</sub> <sup>+2</sup>                                  | 996.3812                | y <sub>7</sub>                                                 | 1358.6349               | y <sub>12</sub> -2H <sub>3</sub> PO <sub>4</sub>               | 2125.0686 | y <sub>19</sub> -2H <sub>3</sub> PO <sub>4</sub> |
| 381.1763 <sup>+2</sup> | y <sub>6</sub> -H <sub>3</sub> PO <sub>4</sub> <sup>+2</sup>  | 713.2767 <sup>+2</sup> | y <sub>11</sub> <sup>+2</sup>                                  | 1004.4928 <sup>+2</sup> | b <sub>19</sub> -2H <sub>3</sub> PO <sub>4</sub> <sup>+2</sup> | 1365.6797               | b <sub>12</sub>                                                | 2136.9012 | y <sub>17</sub>                                  |
| 400.7174 <sup>+2</sup> | y <sub>7</sub> -2H <sub>3</sub> PO <sub>4</sub> <sup>+2</sup> | 728.8095 <sup>+2</sup> | y <sub>12</sub> -H <sub>3</sub> PO <sub>4</sub> <sup>+2</sup>  | 1012.4473               | y <sub>9</sub> -H <sub>3</sub> PO <sub>4</sub>                 | 1422.7012               | b <sub>13</sub>                                                | 2152.0084 | y <sub>18</sub> -H <sub>3</sub> PO <sub>4</sub>  |
| 403.7478 <sup>+2</sup> | b <sub>8</sub> <sup>+2</sup>                                  | 737.3345 <sup>+2</sup> | y <sub>13</sub> -2H <sub>3</sub> PO <sub>4</sub> <sup>+2</sup> | 1018.4304 <sup>+2</sup> | y <sub>16</sub> <sup>+2</sup>                                  | 1425.5461               | y <sub>11</sub>                                                | 2203.008  | b <sub>20</sub> -H <sub>3</sub> PO <sub>4</sub>  |
| 429.2281 <sup>+2</sup> | y <sub>8</sub> -2H <sub>3</sub> PO <sub>4</sub> <sup>+2</sup> | 740.3650 <sup>+2</sup> | b <sub>14</sub> <sup>+2</sup>                                  | 1018.9705 <sup>+2</sup> | b <sub>18</sub> <sup>+2</sup>                                  | 1456.6118               | y <sub>12</sub> -H <sub>3</sub> PO <sub>4</sub>                | 2203.9322 | b <sub>19</sub>                                  |
| 430.1648 <sup>+2</sup> | y <sub>6</sub> <sup>+2</sup>                                  | 761.3454               | y <sub>6</sub> -H <sub>3</sub> PO <sub>4</sub>                 | 1019.9658 <sup>+2</sup> | y <sub>17</sub> -H <sub>3</sub> PO <sub>4</sub> <sup>+2</sup>  | 1473.6618               | y <sub>13</sub> -2H <sub>3</sub> PO <sub>4</sub>               | 2222.1214 | y <sub>20</sub> -2H <sub>3</sub> PO <sub>4</sub> |
| 439.1701               | y <sub>3</sub>                                                | 777.7980 <sup>+2</sup> | y <sub>12</sub> <sup>+2</sup>                                  | 1027.5194 <sup>+2</sup> | y <sub>18</sub> -2H <sub>3</sub> PO <sub>4</sub> <sup>+2</sup> | 1479.7227               | b <sub>14</sub>                                                | 2223.0455 | y <sub>19</sub> -H <sub>3</sub> PO <sub>4</sub>  |
| 440.2504               | b <sub>5</sub>                                                | 786.3230 <sup>+2</sup> | y <sub>13</sub> -H <sub>3</sub> PO <sub>4</sub> <sup>+2</sup>  | 1050.5578               | b <sub>10</sub>                                                | 1554.5886               | y <sub>12</sub>                                                | 2249.9853 | y <sub>18</sub>                                  |
| 449.7058 <sup>+2</sup> | y <sub>7</sub> -H <sub>3</sub> PO <sub>4</sub> <sup>+2</sup>  | 800.4274               | y <sub>7</sub> -2H <sub>3</sub> PO <sub>4</sub>                | 1053.0192 <sup>+2</sup> | b <sub>20</sub> -2H <sub>3</sub> PO <sub>4</sub> <sup>+2</sup> | 1571.6387               | y <sub>13</sub> -H <sub>3</sub> PO <sub>4</sub>                | 2300.9849 | b <sub>20</sub>                                  |
| 457.7388 <sup>+2</sup> | y <sub>9</sub> -2H <sub>3</sub> PO <sub>4</sub> <sup>+2</sup> | 806.4883               | b <sub>8</sub>                                                 | 1053.4027               | y <sub>8</sub>                                                 | 1616.7816               | b <sub>15</sub>                                                | 2320.0983 | y <sub>20</sub> -H <sub>3</sub> PO <sub>4</sub>  |
| 461.2613 <sup>+2</sup> | b <sub>9</sub> <sup>+2</sup>                                  | 808.8944 <sup>+2</sup> | b <sub>15</sub> <sup>+2</sup>                                  | 1053.4813 <sup>+2</sup> | b <sub>19</sub> -H <sub>3</sub> PO <sub>4</sub> <sup>+2</sup>  | 1629.7629               | y <sub>14</sub> -2H <sub>3</sub> PO <sub>4</sub>               | 2321.0224 | y <sub>19</sub>                                  |
| 478.2165 <sup>+2</sup> | y <sub>8</sub> -H <sub>3</sub> PO <sub>4</sub> <sup>+2</sup>  | 815.3851 <sup>+2</sup> | y <sub>14</sub> -2H <sub>3</sub> PO <sub>4</sub> <sup>+2</sup> | 1063.0379 <sup>+2</sup> | y <sub>19</sub> -2H <sub>3</sub> PO <sub>4</sub> <sup>+2</sup> | 1669.6156               | y <sub>13</sub>                                                | 2377.1197 | MH-H <sub>3</sub> PO <sub>4</sub>                |
| 497.2943               | y <sub>4</sub> -H <sub>3</sub> PO <sub>4</sub>                | 835.3114 <sup>+2</sup> | y <sub>13</sub> <sup>+2</sup>                                  | 1068.9542 <sup>+2</sup> | y <sub>17</sub> <sup>+2</sup>                                  | 1685.803                | b <sub>16</sub> -H <sub>3</sub> PO <sub>4</sub>                | 2418.0751 | y <sub>20</sub>                                  |
| 498.6942 <sup>+2</sup> | y <sub>7</sub> <sup>+2</sup>                                  | 843.4052 <sup>+2</sup> | b <sub>16</sub> -H <sub>3</sub> PO <sub>4</sub> <sup>+2</sup>  | 1076.5078 <sup>+2</sup> | y <sub>18</sub> -H <sub>3</sub> PO <sub>4</sub> <sup>+2</sup>  | 1727.7398               | y <sub>14</sub> -H <sub>3</sub> PO <sub>4</sub>                | 2475.0966 | MH                                               |
| 506.7273 <sup>+2</sup> | y <sub>9</sub> -H <sub>3</sub> PO <sub>4</sub> <sup>+2</sup>  | 857.4489               | y <sub>8</sub> -2H <sub>3</sub> PO <sub>4</sub>                | 1100.5497               | y <sub>10</sub> -2H <sub>3</sub> PO <sub>4</sub>               | 1742.847                | y <sub>15</sub> -2H <sub>3</sub> PO <sub>4</sub>               |           |                                                  |
| 525.7826 <sup>+2</sup> | b <sub>10</sub> <sup>+2</sup>                                 | 859.3223               | y <sub>6</sub>                                                 | 1102.0077 <sup>+2</sup> | b <sub>20</sub> -H <sub>3</sub> PO <sub>4</sub> <sup>+2</sup>  | 1782.8558               | b <sub>17</sub> -H <sub>3</sub> PO <sub>4</sub>                |           |                                                  |
| 527.2050 <sup>+2</sup> | y <sub>8</sub> <sup>+2</sup>                                  | 864.3735 <sup>+2</sup> | y <sub>14</sub> -H <sub>3</sub> PO <sub>4</sub> <sup>+2</sup>  | 1102.4697 <sup>+2</sup> | b <sub>19</sub> <sup>+2</sup>                                  | 1783.7799               | b <sub>16</sub>                                                |           |                                                  |
| 537.3031               | b <sub>6</sub>                                                | 871.9271 <sup>+2</sup> | y <sub>15</sub> -2H <sub>3</sub> PO <sub>4</sub> <sup>+2</sup> | 1110.4241               | y <sub>9</sub>                                                 | 1825.7167               | y <sub>14</sub>                                                |           |                                                  |

MS/MS Fragmentation of ARsVDALDDLTTPSTAESGRSPTsNGGR  
 Found in IPI00328218, Isoform 2 of Lipolysis-stimulated lipoprotein receptor

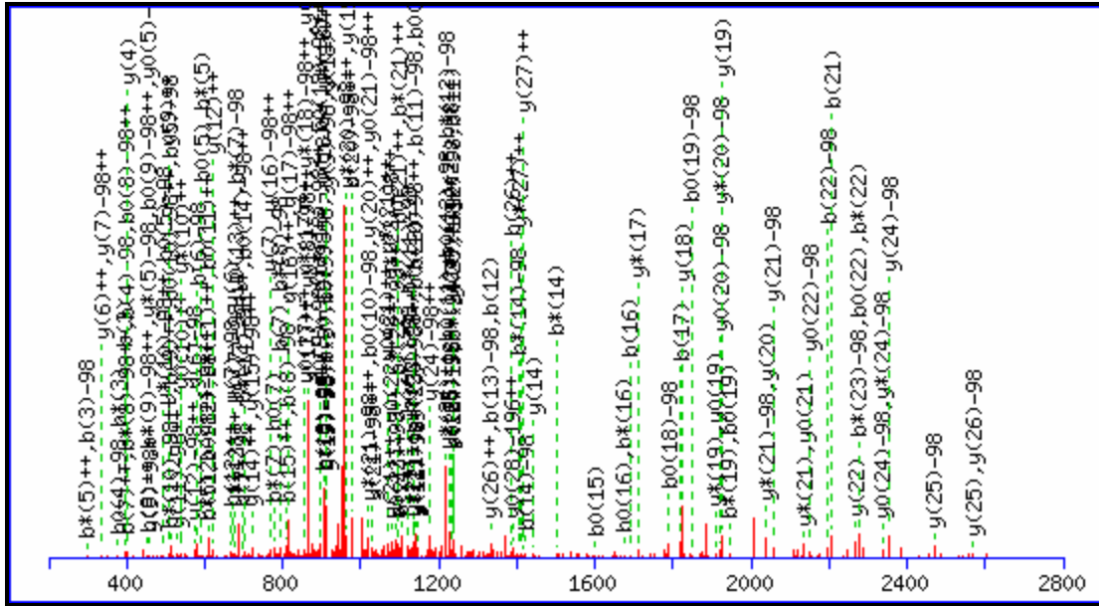

|                        |                                                               |                        |                                                               |                         |                                                                |                         |                                                                |           |                                                  |
|------------------------|---------------------------------------------------------------|------------------------|---------------------------------------------------------------|-------------------------|----------------------------------------------------------------|-------------------------|----------------------------------------------------------------|-----------|--------------------------------------------------|
| 88.0631 <sup>-2</sup>  | y <sub>1</sub> <sup>+2</sup>                                  | 570.2882 <sup>-2</sup> | b <sub>11</sub> -H <sub>3</sub> PO <sub>4</sub> <sup>+2</sup> | 933.4474 <sup>-2</sup>  | b <sub>19</sub> -H <sub>3</sub> PO <sub>4</sub> <sup>+2</sup>  | 1330.0679 <sup>-2</sup> | b <sub>25</sub> <sup>+2</sup>                                  | 2038.919  | y <sub>20</sub>                                  |
| 114.5764 <sup>-2</sup> | b <sub>7</sub> <sup>+2</sup>                                  | 572.7763 <sup>-2</sup> | y <sub>12</sub> -H <sub>3</sub> PO <sub>4</sub> <sup>+2</sup> | 953.9251 <sup>-2</sup>  | b <sub>18</sub> <sup>+2</sup>                                  | 1333.6747               | b <sub>13</sub> -H <sub>3</sub> PO <sub>4</sub>                | 2050.8965 | b <sub>20</sub>                                  |
| 116.5738 <sup>-2</sup> | y <sub>2</sub> <sup>+2</sup>                                  | 573.2739               | y <sub>6</sub> -H <sub>3</sub> PO <sub>4</sub>                | 963.4211 <sup>-2</sup>  | y <sub>19</sub> <sup>+2</sup>                                  | 1334.0983 <sup>-2</sup> | y <sub>26</sub> <sup>+2</sup>                                  | 2055.969  | y <sub>21</sub> -H <sub>3</sub> PO <sub>4</sub>  |
| 145.0846 <sup>-2</sup> | y <sub>3</sub> <sup>+2</sup>                                  | 578.2488 <sup>-2</sup> | y <sub>11</sub> <sup>+2</sup>                                 | 970.9747 <sup>-2</sup>  | y <sub>20</sub> -H <sub>3</sub> PO <sub>4</sub> <sup>+2</sup>  | 1334.5988               | b <sub>12</sub>                                                | 2109.0207 | b <sub>21</sub> -H <sub>3</sub> PO <sub>4</sub>  |
| 149.0871 <sup>-2</sup> | b <sub>3</sub> -H <sub>3</sub> PO <sub>4</sub> <sup>+2</sup>  | 582.2994               | b <sub>6</sub> -H <sub>3</sub> PO <sub>4</sub>                | 976.9634 <sup>-2</sup>  | b <sub>20</sub> -H <sub>3</sub> PO <sub>4</sub> <sup>+2</sup>  | 1338.1009 <sup>-2</sup> | b <sub>26</sub> -H <sub>3</sub> PO <sub>4</sub> <sup>+2</sup>  | 2153.9459 | y <sub>21</sub>                                  |
| 175.119                | y <sub>1</sub>                                                | 609.2392               | b <sub>5</sub>                                                | 982.4359 <sup>-2</sup>  | b <sub>19</sub> <sup>+2</sup>                                  | 1344.6251               | y <sub>14</sub> -H <sub>3</sub> PO <sub>4</sub>                | 2170.9959 | y <sub>22</sub> -H <sub>3</sub> PO <sub>4</sub>  |
| 198.0756 <sup>-2</sup> | b <sub>1</sub> <sup>+2</sup>                                  | 618.8146 <sup>-2</sup> | b <sub>12</sub> -H <sub>3</sub> PO <sub>4</sub> <sup>+2</sup> | 1000.4919               | y <sub>10</sub> -H <sub>3</sub> PO <sub>4</sub>                | 1346.1339 <sup>-2</sup> | b <sub>28</sub> -2H <sub>3</sub> PO <sub>4</sub> <sup>+2</sup> | 2196.0527 | b <sub>22</sub> -H <sub>3</sub> PO <sub>4</sub>  |
| 198.6213 <sup>-2</sup> | b <sub>4</sub> -H <sub>3</sub> PO <sub>4</sub> <sup>+2</sup>  | 619.2766 <sup>-2</sup> | b <sub>11</sub> <sup>+2</sup>                                 | 1011.4367               | y <sub>9</sub>                                                 | 1366.6116 <sup>-2</sup> | b <sub>27</sub> -H <sub>3</sub> PO <sub>4</sub> <sup>+2</sup>  | 2206.9976 | b <sub>21</sub>                                  |
| 202.1060 <sup>-2</sup> | y <sub>4</sub> <sup>+2</sup>                                  | 621.7648 <sup>-2</sup> | y <sub>12</sub> <sup>+2</sup>                                 | 1019.9631 <sup>-2</sup> | y <sub>20</sub> <sup>+2</sup>                                  | 1368.6091 <sup>-2</sup> | y <sub>27</sub> -H <sub>3</sub> PO <sub>4</sub> <sup>+2</sup>  | 2268.9728 | y <sub>22</sub>                                  |
| 228.1455               | b <sub>2</sub>                                                | 637.2976 <sup>-2</sup> | y <sub>13</sub> -H <sub>3</sub> PO <sub>4</sub> <sup>+2</sup> | 1023.4143               | b <sub>9</sub>                                                 | 1371.5649               | y <sub>13</sub>                                                | 2284.08   | y <sub>23</sub> -H <sub>3</sub> PO <sub>4</sub>  |
| 232.1404               | y <sub>2</sub>                                                | 667.3410 <sup>-2</sup> | b <sub>13</sub> -H <sub>3</sub> PO <sub>4</sub> <sup>+2</sup> | 1025.9519 <sup>-2</sup> | b <sub>20</sub> <sup>+2</sup>                                  | 1387.0893 <sup>-2</sup> | b <sub>26</sub> <sup>+2</sup>                                  | 2293.1055 | b <sub>23</sub> -H <sub>3</sub> PO <sub>4</sub>  |
| 236.6168 <sup>-2</sup> | y <sub>5</sub> -H <sub>3</sub> PO <sub>4</sub> <sup>+2</sup>  | 667.8030 <sup>-2</sup> | b <sub>12</sub> <sup>+2</sup>                                 | 1028.4881 <sup>-2</sup> | y <sub>21</sub> -H <sub>3</sub> PO <sub>4</sub> <sup>+2</sup>  | 1395.1223 <sup>-2</sup> | b <sub>28</sub> -H <sub>3</sub> PO <sub>4</sub> <sup>+2</sup>  | 2294.0296 | b <sub>22</sub>                                  |
| 247.6098 <sup>-2</sup> | b <sub>4</sub> <sup>+2</sup>                                  | 670.3267               | y <sub>7</sub> -H <sub>3</sub> PO <sub>4</sub>                | 1038.5214               | b <sub>10</sub> -H <sub>3</sub> PO <sub>4</sub>                | 1397.6712 <sup>-2</sup> | y <sub>28</sub> -2H <sub>3</sub> PO <sub>4</sub> <sup>+2</sup> | 2355.1171 | y <sub>24</sub> -H <sub>3</sub> PO <sub>4</sub>  |
| 256.1348 <sup>-2</sup> | b <sub>5</sub> -H <sub>3</sub> PO <sub>4</sub> <sup>+2</sup>  | 671.2508               | y <sub>6</sub>                                                | 1055.0140 <sup>-2</sup> | b <sub>21</sub> -H <sub>3</sub> PO <sub>4</sub> <sup>+2</sup>  | 1415.6000 <sup>-2</sup> | b <sub>27</sub> <sup>+2</sup>                                  | 2382.0569 | y <sub>23</sub>                                  |
| 285.6052 <sup>-2</sup> | y <sub>5</sub> <sup>+2</sup>                                  | 672.8162 <sup>-2</sup> | y <sub>14</sub> -H <sub>3</sub> PO <sub>4</sub> <sup>+2</sup> | 1057.5133               | y <sub>11</sub> -H <sub>3</sub> PO <sub>4</sub>                | 1417.5975 <sup>-2</sup> | y <sub>27</sub> <sup>+2</sup>                                  | 2391.0824 | b <sub>23</sub>                                  |
| 287.1406 <sup>-2</sup> | y <sub>6</sub> -H <sub>3</sub> PO <sub>4</sub> <sup>+2</sup>  | 680.2763               | b <sub>6</sub>                                                | 1077.4766 <sup>-2</sup> | y <sub>21</sub> <sup>+2</sup>                                  | 1420.7067               | b <sub>14</sub> -H <sub>3</sub> PO <sub>4</sub>                | 2394.1532 | b <sub>24</sub> -H <sub>3</sub> PO <sub>4</sub>  |
| 289.1619               | y <sub>3</sub>                                                | 686.2861 <sup>-2</sup> | y <sub>13</sub> <sup>+2</sup>                                 | 1086.0016 <sup>-2</sup> | y <sub>22</sub> -H <sub>3</sub> PO <sub>4</sub> <sup>+2</sup>  | 1431.6516               | b <sub>13</sub>                                                | 2453.094  | y <sub>24</sub>                                  |
| 291.6534 <sup>-2</sup> | b <sub>6</sub> -H <sub>3</sub> PO <sub>4</sub> <sup>+2</sup>  | 695.3835               | b <sub>7</sub> -H <sub>3</sub> PO <sub>4</sub>                | 1098.4688               | y <sub>10</sub>                                                | 1442.602                | y <sub>14</sub>                                                | 2463.1746 | b <sub>25</sub> -2H <sub>3</sub> PO <sub>4</sub> |
| 297.167                | b <sub>3</sub> -H <sub>3</sub> PO <sub>4</sub>                | 710.8570 <sup>-2</sup> | b <sub>14</sub> -H <sub>3</sub> PO <sub>4</sub> <sup>+2</sup> | 1098.5300 <sup>-2</sup> | b <sub>22</sub> -H <sub>3</sub> PO <sub>4</sub> <sup>+2</sup>  | 1444.1108 <sup>-2</sup> | b <sub>28</sub> <sup>+2</sup>                                  | 2470.1441 | y <sub>25</sub> -H <sub>3</sub> PO <sub>4</sub>  |
| 305.1232 <sup>-2</sup> | b <sub>5</sub> <sup>+2</sup>                                  | 716.3294 <sup>-2</sup> | b <sub>13</sub> <sup>+2</sup>                                 | 1104.0024 <sup>-2</sup> | b <sub>21</sub> <sup>+2</sup>                                  | 1445.6728               | y <sub>15</sub> -H <sub>3</sub> PO <sub>4</sub>                | 2492.1301 | b <sub>24</sub>                                  |
| 335.6670 <sup>-2</sup> | y <sub>7</sub> -H <sub>3</sub> PO <sub>4</sub> <sup>+2</sup>  | 721.8046 <sup>-2</sup> | y <sub>14</sub> <sup>+2</sup>                                 | 1134.9901 <sup>-2</sup> | y <sub>22</sub> <sup>+2</sup>                                  | 1446.6596 <sup>-2</sup> | y <sub>28</sub> -H <sub>3</sub> PO <sub>4</sub> <sup>+2</sup>  | 2561.1515 | b <sub>25</sub> -H <sub>3</sub> PO <sub>4</sub>  |
| 336.1291 <sup>-2</sup> | y <sub>6</sub> <sup>+2</sup>                                  | 723.3400 <sup>-2</sup> | y <sub>15</sub> -H <sub>3</sub> PO <sub>4</sub> <sup>+2</sup> | 1136.4983               | b <sub>10</sub>                                                | 1482.1782 <sup>-2</sup> | MH-H <sub>3</sub> PO <sub>4</sub> <sup>+2</sup>                | 2568.121  | y <sub>25</sub>                                  |
| 340.6418 <sup>-2</sup> | b <sub>6</sub> <sup>+2</sup>                                  | 757.3587               | y <sub>8</sub> -H <sub>3</sub> PO <sub>4</sub>                | 1139.5691               | b <sub>11</sub> -H <sub>3</sub> PO <sub>4</sub>                | 1495.6481 <sup>-2</sup> | y <sub>28</sub> <sup>+2</sup>                                  | 2569.2125 | y <sub>26</sub> -H <sub>3</sub> PO <sub>4</sub>  |
| 348.1954 <sup>-2</sup> | b <sub>5</sub> -H <sub>3</sub> PO <sub>4</sub> <sup>+2</sup>  | 759.8454 <sup>-2</sup> | b <sub>14</sub> <sup>+2</sup>                                 | 1142.5436 <sup>-2</sup> | y <sub>23</sub> -H <sub>3</sub> PO <sub>4</sub> <sup>+2</sup>  | 1518.6836               | b <sub>14</sub>                                                | 2577.2176 | b <sub>26</sub> -2H <sub>3</sub> PO <sub>4</sub> |
| 379.1830 <sup>-2</sup> | y <sub>8</sub> -H <sub>3</sub> PO <sub>4</sub> <sup>+2</sup>  | 761.3808 <sup>-2</sup> | b <sub>15</sub> -H <sub>3</sub> PO <sub>4</sub> <sup>+2</sup> | 1144.5454               | y <sub>12</sub> -H <sub>3</sub> PO <sub>4</sub>                | 1521.7544               | b <sub>15</sub> -H <sub>3</sub> PO <sub>4</sub>                | 2634.239  | b <sub>27</sub> -2H <sub>3</sub> PO <sub>4</sub> |
| 384.6554 <sup>-2</sup> | y <sub>7</sub> <sup>+2</sup>                                  | 766.8560 <sup>-2</sup> | y <sub>16</sub> -H <sub>3</sub> PO <sub>4</sub> <sup>+2</sup> | 1147.0564 <sup>-2</sup> | b <sub>23</sub> -H <sub>3</sub> PO <sub>4</sub> <sup>+2</sup>  | 1531.1666 <sup>-2</sup> | MH <sup>+2</sup>                                               | 2638.2339 | y <sub>27</sub> -2H <sub>3</sub> PO <sub>4</sub> |
| 395.1439               | b <sub>3</sub>                                                | 768.3036               | y <sub>7</sub>                                                | 1147.5185 <sup>-2</sup> | b <sub>22</sub> <sup>+2</sup>                                  | 1532.7048               | y <sub>16</sub> -H <sub>3</sub> PO <sub>4</sub>                | 2659.1284 | b <sub>25</sub>                                  |
| 396.2354               | b <sub>4</sub> -H <sub>3</sub> PO <sub>4</sub>                | 772.3285 <sup>-2</sup> | y <sub>15</sub> <sup>+2</sup>                                 | 1155.4902               | y <sub>11</sub>                                                | 1543.6497               | y <sub>15</sub>                                                | 2667.1894 | y <sub>26</sub>                                  |
| 397.1838 <sup>-2</sup> | b <sub>7</sub> <sup>+2</sup>                                  | 793.3604               | b <sub>7</sub>                                                | 1178.0622 <sup>-2</sup> | y <sub>24</sub> -H <sub>3</sub> PO <sub>4</sub> <sup>+2</sup>  | 1592.7915               | b <sub>16</sub> -H <sub>3</sub> PO <sub>4</sub>                | 2675.1945 | b <sub>26</sub> -H <sub>3</sub> PO <sub>4</sub>  |
| 403.2048               | y <sub>4</sub>                                                | 796.8994 <sup>-2</sup> | b <sub>16</sub> -H <sub>3</sub> PO <sub>4</sub> <sup>+2</sup> | 1191.5321 <sup>-2</sup> | y <sub>23</sub> <sup>+2</sup>                                  | 1619.7313               | b <sub>15</sub>                                                | 2691.2605 | b <sub>28</sub> -2H <sub>3</sub> PO <sub>4</sub> |
| 405.7089 <sup>-2</sup> | b <sub>8</sub> -H <sub>3</sub> PO <sub>4</sub> <sup>+2</sup>  | 810.3693 <sup>-2</sup> | b <sub>15</sub> <sup>+2</sup>                                 | 1196.0448 <sup>-2</sup> | b <sub>23</sub> <sup>+2</sup>                                  | 1629.7576               | y <sub>17</sub> -H <sub>3</sub> PO <sub>4</sub>                | 2732.2159 | b <sub>27</sub> -H <sub>3</sub> PO <sub>4</sub>  |
| 428.1715 <sup>-2</sup> | y <sub>8</sub> <sup>+2</sup>                                  | 810.4104               | b <sub>8</sub> -H <sub>3</sub> PO <sub>4</sub>                | 1197.5802 <sup>-2</sup> | b <sub>24</sub> -H <sub>3</sub> PO <sub>4</sub> <sup>+2</sup>  | 1630.6817               | y <sub>16</sub>                                                | 2736.2108 | y <sub>27</sub> -H <sub>3</sub> PO <sub>4</sub>  |
| 454.6973 <sup>-2</sup> | b <sub>8</sub> <sup>+2</sup>                                  | 815.3824 <sup>-2</sup> | y <sub>17</sub> -H <sub>3</sub> PO <sub>4</sub> <sup>+2</sup> | 1227.0506 <sup>-2</sup> | y <sub>24</sub> <sup>+2</sup>                                  | 1690.7684               | b <sub>16</sub>                                                | 2773.1714 | b <sub>26</sub>                                  |
| 457.2336 <sup>-2</sup> | y <sub>9</sub> -H <sub>3</sub> PO <sub>4</sub> <sup>+2</sup>  | 815.8445 <sup>-2</sup> | y <sub>16</sub> <sup>+2</sup>                                 | 1232.0910 <sup>-2</sup> | b <sub>25</sub> -2H <sub>3</sub> PO <sub>4</sub> <sup>+2</sup> | 1721.8341               | b <sub>17</sub> -H <sub>3</sub> PO <sub>4</sub>                | 2789.2374 | b <sub>28</sub> -H <sub>3</sub> PO <sub>4</sub>  |
| 463.2223 <sup>-2</sup> | b <sub>9</sub> -H <sub>3</sub> PO <sub>4</sub> <sup>+2</sup>  | 845.8878 <sup>-2</sup> | b <sub>16</sub> <sup>+2</sup>                                 | 1235.5757 <sup>-2</sup> | y <sub>25</sub> -H <sub>3</sub> PO <sub>4</sub> <sup>+2</sup>  | 1726.8103               | y <sub>18</sub> -H <sub>3</sub> PO <sub>4</sub>                | 2794.3351 | y <sub>28</sub> -2H <sub>3</sub> PO <sub>4</sub> |
| 472.2263               | y <sub>5</sub> -H <sub>3</sub> PO <sub>4</sub>                | 855.3356               | y <sub>8</sub>                                                | 1236.6219               | b <sub>12</sub> -H <sub>3</sub> PO <sub>4</sub>                | 1727.7344               | y <sub>17</sub>                                                | 2830.1928 | b <sub>27</sub>                                  |
| 494.2123               | b <sub>4</sub>                                                | 861.4207 <sup>-2</sup> | b <sub>17</sub> -H <sub>3</sub> PO <sub>4</sub> <sup>+2</sup> | 1237.546                | b <sub>11</sub>                                                | 1808.8661               | b <sub>18</sub> -H <sub>3</sub> PO <sub>4</sub>                | 2834.1877 | y <sub>27</sub>                                  |
| 500.7496 <sup>-2</sup> | y <sub>10</sub> -H <sub>3</sub> PO <sub>4</sub> <sup>+2</sup> | 863.9088 <sup>-2</sup> | y <sub>18</sub> -H <sub>3</sub> PO <sub>4</sub> <sup>+2</sup> | 1242.5223               | y <sub>12</sub>                                                | 1819.811                | b <sub>17</sub>                                                | 2887.2143 | b <sub>28</sub>                                  |
| 506.2220 <sup>-2</sup> | y <sub>9</sub> <sup>+2</sup>                                  | 864.3709 <sup>-2</sup> | y <sub>17</sub> <sup>+2</sup>                                 | 1246.5687 <sup>-2</sup> | b <sub>24</sub> <sup>+2</sup>                                  | 1824.7872               | y <sub>18</sub>                                                | 2892.3119 | y <sub>28</sub> -H <sub>3</sub> PO <sub>4</sub>  |
| 511.2623               | b <sub>5</sub> -H <sub>3</sub> PO <sub>4</sub>                | 904.9367 <sup>-2</sup> | b <sub>18</sub> -H <sub>3</sub> PO <sub>4</sub> <sup>+2</sup> | 1273.588                | y <sub>13</sub> -H <sub>3</sub> PO <sub>4</sub>                | 1827.858                | y <sub>19</sub> -H <sub>3</sub> PO <sub>4</sub>                | 2963.3491 | MH-H <sub>3</sub> PO <sub>4</sub>                |
| 512.2108 <sup>-2</sup> | b <sub>9</sub> <sup>+2</sup>                                  | 908.3873               | b <sub>8</sub>                                                | 1281.0794 <sup>-2</sup> | b <sub>25</sub> -H <sub>3</sub> PO <sub>4</sub> <sup>+2</sup>  | 1865.8876               | b <sub>19</sub> -H <sub>3</sub> PO <sub>4</sub>                | 2990.2888 | y <sub>28</sub>                                  |
| 519.7644 <sup>-2</sup> | b <sub>10</sub> -H <sub>3</sub> PO <sub>4</sub> <sup>+2</sup> | 910.4091 <sup>-2</sup> | b <sub>17</sub> <sup>+2</sup>                                 | 1284.5641 <sup>-2</sup> | y <sub>25</sub> <sup>+2</sup>                                  | 1906.843                | b <sub>18</sub>                                                | 3061.326  | MH                                               |
| 529.2603 <sup>-2</sup> | y <sub>11</sub> -H <sub>3</sub> PO <sub>4</sub> <sup>+2</sup> | 912.8972 <sup>-2</sup> | y <sub>18</sub> <sup>+2</sup>                                 | 1285.1099 <sup>-2</sup> | y <sub>26</sub> -H <sub>3</sub> PO <sub>4</sub> <sup>+2</sup>  | 1925.8349               | y <sub>19</sub>                                                |           |                                                  |
| 549.7380 <sup>-2</sup> | y <sub>10</sub> <sup>+2</sup>                                 | 913.4599               | y <sub>9</sub> -H <sub>3</sub> PO <sub>4</sub>                | 1289.1124 <sup>-2</sup> | b <sub>26</sub> -2H <sub>3</sub> PO <sub>4</sub> <sup>+2</sup> | 1940.9421               | y <sub>20</sub> -H <sub>3</sub> PO <sub>4</sub>                |           |                                                  |
| 568.7528 <sup>-2</sup> | b <sub>10</sub> <sup>+2</sup>                                 | 914.4326 <sup>-2</sup> | y <sub>19</sub> -H <sub>3</sub> PO <sub>4</sub> <sup>+2</sup> | 1317.6232 <sup>-2</sup> | b <sub>27</sub> -2H <sub>3</sub> PO <sub>4</sub> <sup>+2</sup> | 1952.9196               | b <sub>20</sub> -H <sub>3</sub> PO <sub>4</sub>                |           |                                                  |
| 570.2032               | y <sub>5</sub>                                                | 925.4374               | b <sub>9</sub> -H <sub>3</sub> PO <sub>4</sub>                | 1319.6206 <sup>-2</sup> | y <sub>27</sub> -2H <sub>3</sub> PO <sub>4</sub> <sup>+2</sup> | 1963.8645               | b <sub>19</sub>                                                |           |                                                  |

MS/MS Fragmentation of SLsLDPGQSLEPHPEGPQR  
 Found in IPI00024312, FYVE, RhoGEF and PH domain-containing protein 1

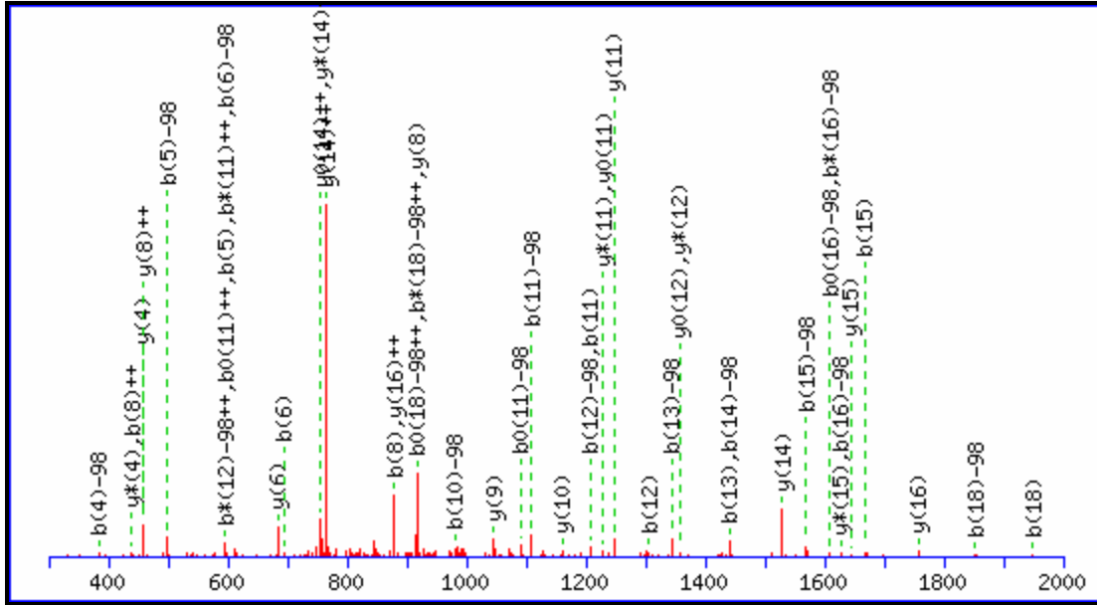

|                        |                                                |                        |                                                               |                        |                                                               |                         |                                                 |           |                                                 |
|------------------------|------------------------------------------------|------------------------|---------------------------------------------------------------|------------------------|---------------------------------------------------------------|-------------------------|-------------------------------------------------|-----------|-------------------------------------------------|
| 88.0631 <sup>+2</sup>  | y <sub>1</sub> <sup>+2</sup>                   | 523.7543 <sup>+2</sup> | y <sub>9</sub> <sup>+2</sup>                                  | 785.3808 <sup>+2</sup> | b <sub>15</sub> -H <sub>3</sub> PO <sub>4</sub> <sup>+2</sup> | 980.5047                | b <sub>10</sub> -H <sub>3</sub> PO <sub>4</sub> | 1538.6887 | b <sub>14</sub>                                 |
| 152.0924 <sup>+2</sup> | y <sub>2</sub> <sup>+2</sup>                   | 580.2964 <sup>+2</sup> | y <sub>10</sub> <sup>+2</sup>                                 | 813.8916 <sup>+2</sup> | b <sub>16</sub> -H <sub>3</sub> PO <sub>4</sub> <sup>+2</sup> | 1013.5031 <sup>+2</sup> | MH-H <sub>3</sub> PO <sub>4</sub> <sup>+2</sup> | 1569.7544 | b <sub>15</sub> -H <sub>3</sub> PO <sub>4</sub> |
| 175.119                | y <sub>1</sub>                                 | 586.2944               | y <sub>5</sub>                                                | 820.406                | y <sub>7</sub>                                                | 1018.9755 <sup>+2</sup> | y <sub>18</sub> <sup>+2</sup>                   | 1626.7758 | b <sub>16</sub> -H <sub>3</sub> PO <sub>4</sub> |
| 200.6188 <sup>+2</sup> | y <sub>3</sub> <sup>+2</sup>                   | 595.3086               | b <sub>6</sub> -H <sub>3</sub> PO <sub>4</sub>                | 822.3922 <sup>+2</sup> | y <sub>15</sub> <sup>+2</sup>                                 | 1046.5014               | y <sub>9</sub>                                  | 1643.7772 | y <sub>15</sub>                                 |
| 201.1234               | b <sub>2</sub>                                 | 596.2327               | b <sub>5</sub>                                                | 834.3693 <sup>+2</sup> | b <sub>15</sub> <sup>+2</sup>                                 | 1062.4915 <sup>+2</sup> | MH <sup>+2</sup>                                | 1667.7313 | b <sub>15</sub>                                 |
| 229.1295 <sup>+2</sup> | y <sub>4</sub> <sup>+2</sup>                   | 623.8124 <sup>+2</sup> | y <sub>11</sub> <sup>+2</sup>                                 | 862.4179 <sup>+2</sup> | b <sub>17</sub> -H <sub>3</sub> PO <sub>4</sub> <sup>+2</sup> | 1078.4816               | b <sub>10</sub>                                 | 1723.8286 | b <sub>17</sub> -H <sub>3</sub> PO <sub>4</sub> |
| 270.1448               | b <sub>3</sub> -H <sub>3</sub> PO <sub>4</sub> | 652.3301               | b <sub>7</sub> -H <sub>3</sub> PO <sub>4</sub>                | 862.8800 <sup>+2</sup> | b <sub>16</sub> <sup>+2</sup>                                 | 1109.5473               | b <sub>11</sub> -H <sub>3</sub> PO <sub>4</sub> | 1724.7527 | b <sub>16</sub>                                 |
| 293.6508 <sup>+2</sup> | y <sub>5</sub> <sup>+2</sup>                   | 672.3331 <sup>+2</sup> | b <sub>13</sub> -H <sub>3</sub> PO <sub>4</sub> <sup>+2</sup> | 867.4207               | b <sub>9</sub> -H <sub>3</sub> PO <sub>4</sub>                | 1159.5854               | y <sub>10</sub>                                 | 1756.8613 | y <sub>16</sub>                                 |
| 303.1775               | y <sub>2</sub>                                 | 683.3471               | y <sub>6</sub>                                                | 878.3655               | b <sub>8</sub>                                                | 1206.6001               | b <sub>12</sub> -H <sub>3</sub> PO <sub>4</sub> | 1821.8055 | b <sub>17</sub>                                 |
| 342.1772 <sup>+2</sup> | y <sub>6</sub> <sup>+2</sup>                   | 687.8417 <sup>+2</sup> | y <sub>12</sub> <sup>+2</sup>                                 | 878.9343 <sup>+2</sup> | y <sub>16</sub> <sup>+2</sup>                                 | 1207.5242               | b <sub>11</sub>                                 | 1825.8828 | y <sub>17</sub> -H <sub>3</sub> PO <sub>4</sub> |
| 368.1217               | b <sub>3</sub>                                 | 693.2855               | b <sub>6</sub>                                                | 911.4064 <sup>+2</sup> | b <sub>17</sub> <sup>+2</sup>                                 | 1246.6175               | y <sub>11</sub>                                 | 1851.8872 | b <sub>18</sub> -H <sub>3</sub> PO <sub>4</sub> |
| 383.2289               | b <sub>4</sub> -H <sub>3</sub> PO <sub>4</sub> | 716.3524 <sup>+2</sup> | y <sub>13</sub> <sup>+2</sup>                                 | 913.4450 <sup>+2</sup> | y <sub>17</sub> -H <sub>3</sub> PO <sub>4</sub> <sup>+2</sup> | 1304.577                | b <sub>12</sub>                                 | 1923.8596 | y <sub>17</sub>                                 |
| 400.2303               | y <sub>3</sub>                                 | 720.8595 <sup>+2</sup> | b <sub>14</sub> -H <sub>3</sub> PO <sub>4</sub> <sup>+2</sup> | 917.4588               | y <sub>8</sub>                                                | 1343.659                | b <sub>13</sub> -H <sub>3</sub> PO <sub>4</sub> | 1938.9668 | y <sub>18</sub> -H <sub>3</sub> PO <sub>4</sub> |
| 410.7067 <sup>+2</sup> | y <sub>7</sub> <sup>+2</sup>                   | 721.3216 <sup>+2</sup> | b <sub>13</sub> <sup>+2</sup>                                 | 926.4472 <sup>+2</sup> | b <sub>18</sub> -H <sub>3</sub> PO <sub>4</sub> <sup>+2</sup> | 1374.6761               | y <sub>12</sub>                                 | 1949.8641 | b <sub>18</sub>                                 |
| 457.2518               | y <sub>4</sub>                                 | 750.307                | b <sub>7</sub>                                                | 962.4335 <sup>+2</sup> | y <sub>17</sub> <sup>+2</sup>                                 | 1431.6975               | y <sub>13</sub>                                 | 2025.9988 | MH-H <sub>3</sub> PO <sub>4</sub>               |
| 459.2330 <sup>+2</sup> | y <sub>8</sub> <sup>+2</sup>                   | 764.8788 <sup>+2</sup> | y <sub>14</sub> <sup>+2</sup>                                 | 965.3976               | b <sub>9</sub>                                                | 1440.7118               | b <sub>14</sub> -H <sub>3</sub> PO <sub>4</sub> | 2036.9437 | y <sub>18</sub>                                 |
| 481.2058               | b <sub>4</sub>                                 | 769.8480 <sup>+2</sup> | b <sub>14</sub> <sup>+2</sup>                                 | 969.9870 <sup>+2</sup> | y <sub>18</sub> -H <sub>3</sub> PO <sub>4</sub> <sup>+2</sup> | 1441.6359               | b <sub>13</sub>                                 | 2123.9757 | MH                                              |
| 498.2558               | b <sub>5</sub> -H <sub>3</sub> PO <sub>4</sub> | 780.3886               | b <sub>8</sub> -H <sub>3</sub> PO <sub>4</sub>                | 975.4357 <sup>+2</sup> | b <sub>18</sub> <sup>+2</sup>                                 | 1528.7503               | y <sub>14</sub>                                 |           |                                                 |

MS/MS Fragmentation of LRSDPGPPTETPSQRPSPLK  
 Found in IPI00024312, FYVE, RhoGEF and PH domain-containing protein 1

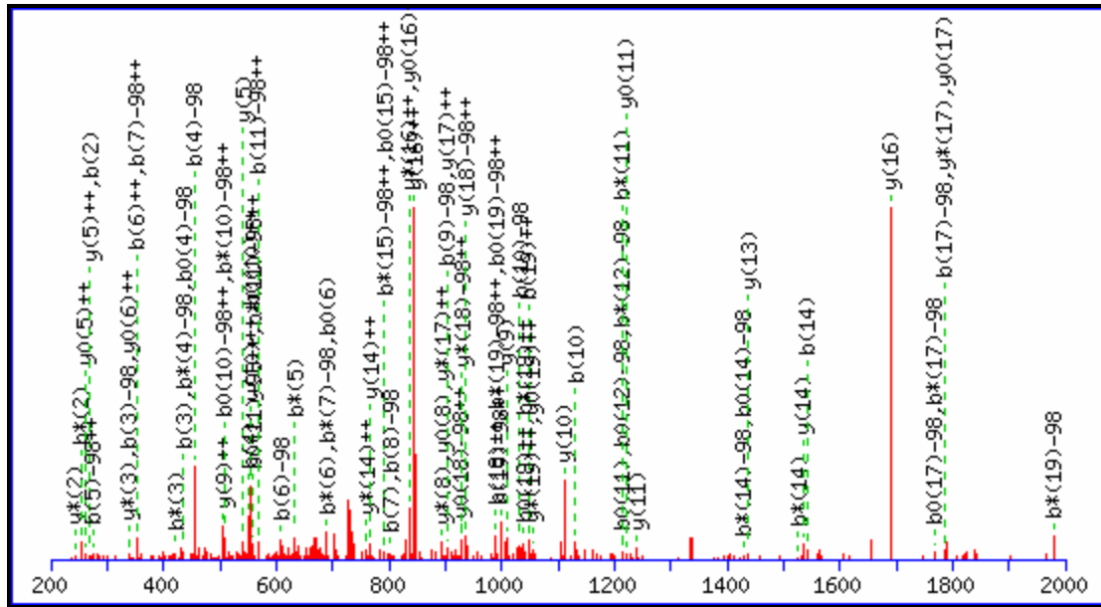

|                        |                                                              |                        |                                                               |                        |                                                               |                         |                                                               |           |                                                 |
|------------------------|--------------------------------------------------------------|------------------------|---------------------------------------------------------------|------------------------|---------------------------------------------------------------|-------------------------|---------------------------------------------------------------|-----------|-------------------------------------------------|
| 74.0600 <sup>+2</sup>  | y <sub>1</sub> <sup>+2</sup>                                 | 437.1908               | b <sub>3</sub>                                                | 705.3678               | b <sub>7</sub> -H <sub>3</sub> PO <sub>4</sub>                | 985.9646 <sup>+2</sup>  | y <sub>18</sub> <sup>+2</sup>                                 | 1543.6788 | b <sub>14</sub>                                 |
| 130.6021 <sup>+2</sup> | y <sub>2</sub> <sup>+2</sup>                                 | 444.2817               | y <sub>4</sub>                                                | 706.292                | b <sub>6</sub>                                                | 990.9624 <sup>+2</sup>  | b <sub>18</sub> <sup>+2</sup>                                 | 1591.8438 | y <sub>15</sub>                                 |
| 135.5999 <sup>+2</sup> | b <sub>2</sub> <sup>+2</sup>                                 | 450.7024 <sup>+2</sup> | b <sub>8</sub> <sup>+2</sup>                                  | 708.3138 <sup>+2</sup> | b <sub>13</sub> <sup>+2</sup>                                 | 998.5160 <sup>+2</sup>  | b <sub>19</sub> -H <sub>3</sub> PO <sub>4</sub> <sup>+2</sup> | 1601.803  | b <sub>15</sub> -H <sub>3</sub> PO <sub>4</sub> |
| 147.1128               | y <sub>1</sub>                                               | 452.2378 <sup>+2</sup> | b <sub>9</sub> -H <sub>3</sub> PO <sub>4</sub> <sup>+2</sup>  | 719.3884 <sup>+2</sup> | y <sub>13</sub> <sup>+2</sup>                                 | 1001.4452               | b <sub>9</sub>                                                | 1688.8966 | y <sub>16</sub>                                 |
| 170.1106 <sup>+2</sup> | b <sub>2</sub> -H <sub>3</sub> PO <sub>4</sub> <sup>+2</sup> | 454.2409               | b <sub>4</sub> -H <sub>3</sub> PO <sub>4</sub>                | 723.3546 <sup>+2</sup> | b <sub>14</sub> -H <sub>3</sub> PO <sub>4</sub> <sup>+2</sup> | 1009.5789               | y <sub>9</sub>                                                | 1698.8558 | b <sub>16</sub> -H <sub>3</sub> PO <sub>4</sub> |
| 179.1285 <sup>+2</sup> | y <sub>3</sub> <sup>+2</sup>                                 | 456.7667 <sup>+2</sup> | y <sub>8</sub> <sup>+2</sup>                                  | 767.9148 <sup>+2</sup> | y <sub>14</sub> <sup>+2</sup>                                 | 1015.0267 <sup>+2</sup> | y <sub>19</sub> -H <sub>3</sub> PO <sub>4</sub> <sup>+2</sup> | 1699.7799 | b <sub>15</sub>                                 |
| 219.0990 <sup>+2</sup> | b <sub>3</sub> <sup>+2</sup>                                 | 501.2262 <sup>+2</sup> | b <sub>9</sub> <sup>+2</sup>                                  | 772.3431 <sup>+2</sup> | b <sub>14</sub> <sup>+2</sup>                                 | 1032.5109               | b <sub>10</sub> -H <sub>3</sub> PO <sub>4</sub>               | 1785.8878 | b <sub>17</sub> -H <sub>3</sub> PO <sub>4</sub> |
| 222.6445 <sup>+2</sup> | y <sub>4</sub> <sup>+2</sup>                                 | 505.2931 <sup>+2</sup> | y <sub>9</sub> <sup>+2</sup>                                  | 796.4256 <sup>+2</sup> | y <sub>15</sub> <sup>+2</sup>                                 | 1047.5044 <sup>+2</sup> | b <sub>19</sub> <sup>+2</sup>                                 | 1796.8327 | b <sub>16</sub>                                 |
| 227.6241 <sup>+2</sup> | b <sub>4</sub> -H <sub>3</sub> PO <sub>4</sub> <sup>+2</sup> | 516.7591 <sup>+2</sup> | b <sub>10</sub> -H <sub>3</sub> PO <sub>4</sub> <sup>+2</sup> | 801.4052 <sup>+2</sup> | b <sub>15</sub> -H <sub>3</sub> PO <sub>4</sub> <sup>+2</sup> | 1064.0151 <sup>+2</sup> | y <sub>19</sub> <sup>+2</sup>                                 | 1803.9236 | y <sub>17</sub>                                 |
| 260.1969               | y <sub>2</sub>                                               | 541.3344               | y <sub>5</sub>                                                | 802.4206               | b <sub>8</sub> -H <sub>3</sub> PO <sub>4</sub>                | 1071.5687 <sup>+2</sup> | MH-H <sub>3</sub> PO <sub>4</sub> <sup>+2</sup>               | 1872.945  | y <sub>18</sub> -H <sub>3</sub> PO <sub>4</sub> |
| 270.1925               | b <sub>2</sub>                                               | 551.2936               | b <sub>5</sub> -H <sub>3</sub> PO <sub>4</sub>                | 803.3447               | b <sub>7</sub>                                                | 1110.6266               | y <sub>10</sub>                                               | 1882.9406 | b <sub>18</sub> -H <sub>3</sub> PO <sub>4</sub> |
| 271.1709 <sup>+2</sup> | y <sub>5</sub> <sup>+2</sup>                                 | 552.2178               | b <sub>4</sub>                                                | 825.4941               | y <sub>7</sub>                                                | 1120.5572 <sup>+2</sup> | MH <sup>+2</sup>                                              | 1883.8647 | b <sub>17</sub>                                 |
| 276.1504 <sup>+2</sup> | b <sub>5</sub> -H <sub>3</sub> PO <sub>4</sub> <sup>+2</sup> | 555.8169 <sup>+2</sup> | y <sub>10</sub> <sup>+2</sup>                                 | 844.9519 <sup>+2</sup> | y <sub>16</sub> <sup>+2</sup>                                 | 1130.4878               | b <sub>10</sub>                                               | 1970.9219 | y <sub>18</sub>                                 |
| 276.6125 <sup>+2</sup> | b <sub>4</sub> <sup>+2</sup>                                 | 565.7475 <sup>+2</sup> | b <sub>10</sub> <sup>+2</sup>                                 | 849.9315 <sup>+2</sup> | b <sub>16</sub> -H <sub>3</sub> PO <sub>4</sub> <sup>+2</sup> | 1133.5586               | b <sub>11</sub> -H <sub>3</sub> PO <sub>4</sub>               | 1980.9175 | b <sub>18</sub>                                 |
| 304.6612 <sup>+2</sup> | b <sub>6</sub> -H <sub>3</sub> PO <sub>4</sub> <sup>+2</sup> | 567.2829 <sup>+2</sup> | b <sub>11</sub> -H <sub>3</sub> PO <sub>4</sub> <sup>+2</sup> | 850.3936 <sup>+2</sup> | b <sub>15</sub> <sup>+2</sup>                                 | 1230.6113               | b <sub>12</sub> -H <sub>3</sub> PO <sub>4</sub>               | 1996.0247 | b <sub>19</sub> -H <sub>3</sub> PO <sub>4</sub> |
| 325.1389 <sup>+2</sup> | b <sub>5</sub> <sup>+2</sup>                                 | 608.3151               | b <sub>6</sub> -H <sub>3</sub> PO <sub>4</sub>                | 893.4476 <sup>+2</sup> | b <sub>17</sub> -H <sub>3</sub> PO <sub>4</sub> <sup>+2</sup> | 1231.5355               | b <sub>11</sub>                                               | 2029.0461 | y <sub>19</sub> -H <sub>3</sub> PO <sub>4</sub> |
| 339.2139               | b <sub>3</sub> -H <sub>3</sub> PO <sub>4</sub>               | 615.8093 <sup>+2</sup> | b <sub>12</sub> -H <sub>3</sub> PO <sub>4</sub> <sup>+2</sup> | 898.9200 <sup>+2</sup> | b <sub>16</sub> <sup>+2</sup>                                 | 1239.6692               | y <sub>11</sub>                                               | 2094.0016 | b <sub>19</sub>                                 |
| 349.2214 <sup>+2</sup> | y <sub>6</sub> <sup>+2</sup>                                 | 616.2714 <sup>+2</sup> | b <sub>11</sub> <sup>+2</sup>                                 | 900.3975               | b <sub>8</sub>                                                | 1317.6434               | b <sub>13</sub> -H <sub>3</sub> PO <sub>4</sub>               | 2127.023  | y <sub>19</sub>                                 |
| 353.1876 <sup>+2</sup> | b <sub>7</sub> -H <sub>3</sub> PO <sub>4</sub> <sup>+2</sup> | 620.3382 <sup>+2</sup> | y <sub>11</sub> <sup>+2</sup>                                 | 902.4654 <sup>+2</sup> | y <sub>17</sub> <sup>+2</sup>                                 | 1328.5882               | b <sub>12</sub>                                               | 2142.1302 | MH-H <sub>3</sub> PO <sub>4</sub>               |
| 353.6496 <sup>+2</sup> | b <sub>6</sub> <sup>+2</sup>                                 | 649.2705               | b <sub>5</sub>                                                | 903.4683               | b <sub>9</sub> -H <sub>3</sub> PO <sub>4</sub>                | 1340.7169               | y <sub>12</sub>                                               | 2240.1071 | MH                                              |
| 357.2496               | y <sub>3</sub>                                               | 659.3253 <sup>+2</sup> | b <sub>13</sub> -H <sub>3</sub> PO <sub>4</sub> <sup>+2</sup> | 912.5261               | y <sub>8</sub>                                                | 1415.6203               | b <sub>13</sub>                                               |           |                                                 |
| 401.7139 <sup>+2</sup> | b <sub>8</sub> -H <sub>3</sub> PO <sub>4</sub> <sup>+2</sup> | 664.7977 <sup>+2</sup> | b <sub>12</sub> <sup>+2</sup>                                 | 936.9761 <sup>+2</sup> | y <sub>18</sub> -H <sub>3</sub> PO <sub>4</sub> <sup>+2</sup> | 1437.7696               | y <sub>13</sub>                                               |           |                                                 |
| 402.1760 <sup>+2</sup> | b <sub>7</sub> <sup>+2</sup>                                 | 670.8621 <sup>+2</sup> | y <sub>12</sub> <sup>+2</sup>                                 | 941.9739 <sup>+2</sup> | b <sub>18</sub> -H <sub>3</sub> PO <sub>4</sub> <sup>+2</sup> | 1445.7019               | b <sub>14</sub> -H <sub>3</sub> PO <sub>4</sub>               |           |                                                 |
| 413.2507 <sup>+2</sup> | y <sub>7</sub> <sup>+2</sup>                                 | 697.4355               | y <sub>6</sub>                                                | 942.4360 <sup>+2</sup> | b <sub>17</sub> <sup>+2</sup>                                 | 1534.8224               | y <sub>14</sub>                                               |           |                                                 |

MS/MS Fragmentation of RGsGSALGGPLDPQFVGPSDTSLGAAPGHR  
 Found in IPI00024312, FYVE, RhoGEF and PH domain-containing protein 1

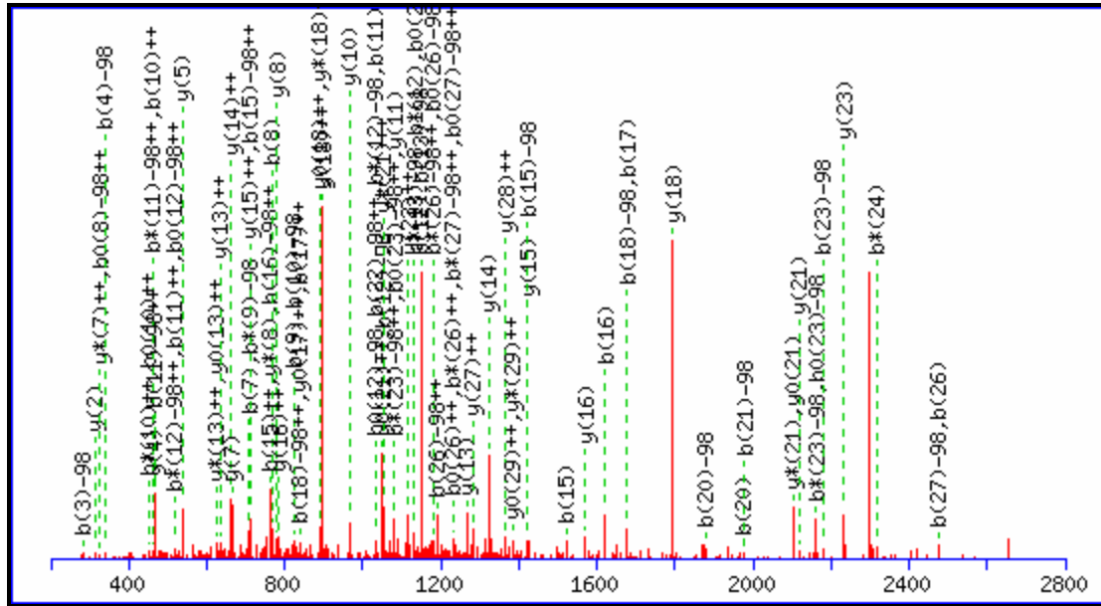

|                        |                                                               |                        |                                                               |                         |                                                               |                         |                                                               |           |                                                 |
|------------------------|---------------------------------------------------------------|------------------------|---------------------------------------------------------------|-------------------------|---------------------------------------------------------------|-------------------------|---------------------------------------------------------------|-----------|-------------------------------------------------|
| 88.0631 <sup>+2</sup>  | y <sub>1</sub> <sup>+2</sup>                                  | 468.2565 <sup>+2</sup> | b <sub>11</sub> -H <sub>3</sub> PO <sub>4</sub> <sup>+2</sup> | 848.9237 <sup>+2</sup>  | y <sub>17</sub> <sup>+2</sup>                                 | 1238.5788 <sup>+2</sup> | b <sub>26</sub> <sup>+2</sup>                                 | 1978.9617 | b <sub>21</sub> -H <sub>3</sub> PO <sub>4</sub> |
| 107.5686 <sup>+2</sup> | b <sub>2</sub> <sup>+2</sup>                                  | 483.7594 <sup>+2</sup> | y <sub>10</sub> <sup>+2</sup>                                 | 865.4639                | y <sub>9</sub>                                                | 1245.5623               | b <sub>13</sub>                                               | 2022.0039 | y <sub>20</sub>                                 |
| 142.0793 <sup>+2</sup> | b <sub>3</sub> -H <sub>3</sub> PO <sub>4</sub> <sup>+2</sup>  | 498.2419               | b <sub>6</sub> -H <sub>3</sub> PO <sub>4</sub>                | 881.9472 <sup>+2</sup>  | b <sub>19</sub> -H <sub>3</sub> PO <sub>4</sub> <sup>+2</sup> | 1252.6301 <sup>+2</sup> | y <sub>26</sub> <sup>+2</sup>                                 | 2065.9938 | b <sub>22</sub> -H <sub>3</sub> PO <sub>4</sub> |
| 156.5926 <sup>+2</sup> | y <sub>2</sub> <sup>+2</sup>                                  | 517.2450 <sup>+2</sup> | b <sub>11</sub> <sup>+2</sup>                                 | 887.4196 <sup>+2</sup>  | b <sub>18</sub> <sup>+2</sup>                                 | 1265.6233               | y <sub>13</sub>                                               | 2076.9386 | b <sub>21</sub>                                 |
| 170.5900 <sup>+2</sup> | b <sub>4</sub> -H <sub>3</sub> PO <sub>4</sub> <sup>+2</sup>  | 525.1817               | b <sub>5</sub>                                                | 897.4501 <sup>+2</sup>  | y <sub>18</sub> <sup>+2</sup>                                 | 1266.6275 <sup>+2</sup> | b <sub>28</sub> -H <sub>3</sub> PO <sub>4</sub> <sup>+2</sup> | 2119.0567 | y <sub>21</sub>                                 |
| 175.119                | y <sub>1</sub>                                                | 525.7700 <sup>+2</sup> | b <sub>12</sub> -H <sub>3</sub> PO <sub>4</sub> <sup>+2</sup> | 920.3986                | b <sub>10</sub>                                               | 1275.644                | b <sub>14</sub> -H <sub>3</sub> PO <sub>4</sub>               | 2163.9707 | b <sub>22</sub>                                 |
| 185.1033 <sup>+2</sup> | y <sub>3</sub> <sup>+2</sup>                                  | 537.2892               | y <sub>5</sub>                                                | 930.9356 <sup>+2</sup>  | b <sub>19</sub> <sup>+2</sup>                                 | 1281.1408 <sup>+2</sup> | y <sub>27</sub> <sup>+2</sup>                                 | 2176.0782 | y <sub>22</sub>                                 |
| 191.0677 <sup>+2</sup> | b <sub>3</sub> <sup>+2</sup>                                  | 541.2729 <sup>+2</sup> | y <sub>11</sub> <sup>+2</sup>                                 | 935.5057                | b <sub>11</sub> -H <sub>3</sub> PO <sub>4</sub>               | 1287.1052 <sup>+2</sup> | b <sub>27</sub> <sup>+2</sup>                                 | 2179.0778 | b <sub>23</sub> -H <sub>3</sub> PO <sub>4</sub> |
| 214.1060 <sup>+2</sup> | b <sub>5</sub> -H <sub>3</sub> PO <sub>4</sub> <sup>+2</sup>  | 574.2964 <sup>+2</sup> | b <sub>13</sub> -H <sub>3</sub> PO <sub>4</sub> <sup>+2</sup> | 939.4607 <sup>+2</sup>  | b <sub>20</sub> -H <sub>3</sub> PO <sub>4</sub> <sup>+2</sup> | 1315.6160 <sup>+2</sup> | b <sub>28</sub> <sup>+2</sup>                                 | 2233.0996 | y <sub>23</sub>                                 |
| 214.1299               | b <sub>2</sub>                                                | 574.7584 <sup>+2</sup> | b <sub>12</sub> <sup>+2</sup>                                 | 954.9636 <sup>+2</sup>  | y <sub>19</sub> <sup>+2</sup>                                 | 1315.6515 <sup>+2</sup> | y <sub>28</sub> -H <sub>3</sub> PO <sub>4</sub> <sup>+2</sup> | 2236.0993 | b <sub>24</sub> -H <sub>3</sub> PO <sub>4</sub> |
| 219.5785 <sup>+2</sup> | b <sub>4</sub> <sup>+2</sup>                                  | 584.7889 <sup>+2</sup> | y <sub>12</sub> <sup>+2</sup>                                 | 966.5116                | y <sub>10</sub>                                               | 1322.6448               | y <sub>14</sub>                                               | 2277.0547 | b <sub>23</sub>                                 |
| 233.6297 <sup>+2</sup> | y <sub>4</sub> <sup>+2</sup>                                  | 596.2188               | b <sub>6</sub>                                                | 988.4491 <sup>+2</sup>  | b <sub>20</sub> <sup>+2</sup>                                 | 1335.1570 <sup>+2</sup> | b <sub>29</sub> -H <sub>3</sub> PO <sub>4</sub> <sup>+2</sup> | 2307.1364 | b <sub>25</sub> -H <sub>3</sub> PO <sub>4</sub> |
| 249.6246 <sup>+2</sup> | b <sub>6</sub> -H <sub>3</sub> PO <sub>4</sub> <sup>+2</sup>  | 608.3263               | y <sub>6</sub>                                                | 989.9845 <sup>+2</sup>  | b <sub>21</sub> -H <sub>3</sub> PO <sub>4</sub> <sup>+2</sup> | 1344.1622 <sup>+2</sup> | y <sub>29</sub> -H <sub>3</sub> PO <sub>4</sub> <sup>+2</sup> | 2334.0762 | b <sub>24</sub>                                 |
| 263.0945 <sup>+2</sup> | b <sub>5</sub> <sup>+2</sup>                                  | 611.326                | b <sub>7</sub> -H <sub>3</sub> PO <sub>4</sub>                | 1011.5056 <sup>+2</sup> | y <sub>20</sub> <sup>+2</sup>                                 | 1364.6400 <sup>+2</sup> | y <sub>28</sub> <sup>+2</sup>                                 | 2346.1837 | y <sub>24</sub>                                 |
| 269.1482 <sup>+2</sup> | y <sub>5</sub> <sup>+2</sup>                                  | 623.2848 <sup>+2</sup> | b <sub>13</sub> <sup>+2</sup>                                 | 1033.4826               | b <sub>11</sub>                                               | 1373.6209               | b <sub>14</sub>                                               | 2378.1735 | b <sub>26</sub> -H <sub>3</sub> PO <sub>4</sub> |
| 283.1513               | b <sub>3</sub> -H <sub>3</sub> PO <sub>4</sub>                | 633.3153 <sup>+2</sup> | y <sub>13</sub> <sup>+2</sup>                                 | 1033.5005 <sup>+2</sup> | b <sub>22</sub> -H <sub>3</sub> PO <sub>4</sub> <sup>+2</sup> | 1384.1454 <sup>+2</sup> | b <sub>29</sub> <sup>+2</sup>                                 | 2405.1133 | b <sub>25</sub>                                 |
| 298.6130 <sup>+2</sup> | b <sub>6</sub> <sup>+2</sup>                                  | 638.3257 <sup>+2</sup> | b <sub>14</sub> -H <sub>3</sub> PO <sub>4</sub> <sup>+2</sup> | 1038.9730 <sup>+2</sup> | b <sub>21</sub> <sup>+2</sup>                                 | 1393.1507 <sup>+2</sup> | y <sub>29</sub> <sup>+2</sup>                                 | 2417.2208 | y <sub>25</sub>                                 |
| 304.6668 <sup>+2</sup> | y <sub>6</sub> <sup>+2</sup>                                  | 661.8260 <sup>+2</sup> | y <sub>14</sub> <sup>+2</sup>                                 | 1050.5327               | b <sub>12</sub> -H <sub>3</sub> PO <sub>4</sub>               | 1421.7132               | y <sub>15</sub>                                               | 2475.2263 | b <sub>27</sub> -H <sub>3</sub> PO <sub>4</sub> |
| 306.1666 <sup>+2</sup> | b <sub>7</sub> -H <sub>3</sub> PO <sub>4</sub> <sup>+2</sup>  | 665.3478               | y <sub>7</sub>                                                | 1060.0320 <sup>+2</sup> | y <sub>21</sub> <sup>+2</sup>                                 | 1422.2128 <sup>+2</sup> | MH-H <sub>3</sub> PO <sub>4</sub> <sup>+2</sup>               | 2476.1504 | b <sub>26</sub>                                 |
| 312.1779               | y <sub>2</sub>                                                | 668.3474               | b <sub>8</sub> -H <sub>3</sub> PO <sub>4</sub>                | 1081.5385               | y <sub>11</sub>                                               | 1422.7124               | b <sub>15</sub> -H <sub>3</sub> PO <sub>4</sub>               | 2504.2528 | y <sub>26</sub>                                 |
| 333.1775 <sup>+2</sup> | y <sub>7</sub> <sup>+2</sup>                                  | 687.3141 <sup>+2</sup> | b <sub>14</sub> <sup>+2</sup>                                 | 1082.4890 <sup>+2</sup> | b <sub>22</sub> <sup>+2</sup>                                 | 1471.2013 <sup>+2</sup> | MH <sup>+2</sup>                                              | 2532.2477 | b <sub>28</sub> -H <sub>3</sub> PO <sub>4</sub> |
| 334.6774 <sup>+2</sup> | b <sub>8</sub> -H <sub>3</sub> PO <sub>4</sub> <sup>+2</sup>  | 709.3029               | b <sub>7</sub>                                                | 1088.5427 <sup>+2</sup> | y <sub>22</sub> <sup>+2</sup>                                 | 1520.6893               | b <sub>15</sub>                                               | 2561.2743 | y <sub>27</sub>                                 |
| 340.1728               | b <sub>4</sub> -H <sub>3</sub> PO <sub>4</sub>                | 711.3602 <sup>+2</sup> | y <sub>15</sub> <sup>+2</sup>                                 | 1090.0425 <sup>+2</sup> | b <sub>23</sub> -H <sub>3</sub> PO <sub>4</sub> <sup>+2</sup> | 1521.7809               | b <sub>16</sub> -H <sub>3</sub> PO <sub>4</sub>               | 2573.2032 | b <sub>27</sub>                                 |
| 355.1551 <sup>+2</sup> | b <sub>7</sub> <sup>+2</sup>                                  | 711.8599 <sup>+2</sup> | b <sub>15</sub> -H <sub>3</sub> PO <sub>4</sub> <sup>+2</sup> | 1117.0534 <sup>+2</sup> | y <sub>23</sub> <sup>+2</sup>                                 | 1568.7816               | y <sub>16</sub>                                               | 2630.2246 | b <sub>28</sub>                                 |
| 363.1881 <sup>+2</sup> | b <sub>9</sub> -H <sub>3</sub> PO <sub>4</sub> <sup>+2</sup>  | 725.3689               | b <sub>9</sub> -H <sub>3</sub> PO <sub>4</sub>                | 1118.5533 <sup>+2</sup> | b <sub>24</sub> -H <sub>3</sub> PO <sub>4</sub> <sup>+2</sup> | 1578.8023               | b <sub>17</sub> -H <sub>3</sub> PO <sub>4</sub>               | 2630.2958 | y <sub>28</sub> -H <sub>3</sub> PO <sub>4</sub> |
| 369.1993               | y <sub>3</sub>                                                | 760.8483 <sup>+2</sup> | b <sub>15</sub> <sup>+2</sup>                                 | 1139.0310 <sup>+2</sup> | b <sub>23</sub> <sup>+2</sup>                                 | 1619.7577               | b <sub>16</sub>                                               | 2669.3067 | b <sub>29</sub> -H <sub>3</sub> PO <sub>4</sub> |
| 381.1282               | b <sub>3</sub>                                                | 761.3941 <sup>+2</sup> | b <sub>16</sub> -H <sub>3</sub> PO <sub>4</sub> <sup>+2</sup> | 1147.5854               | b <sub>13</sub> -H <sub>3</sub> PO <sub>4</sub>               | 1675.8551               | b <sub>18</sub> -H <sub>3</sub> PO <sub>4</sub>               | 2687.3172 | y <sub>29</sub> -H <sub>3</sub> PO <sub>4</sub> |
| 383.6658 <sup>+2</sup> | b <sub>8</sub> <sup>+2</sup>                                  | 766.3243               | b <sub>8</sub>                                                | 1148.5096               | b <sub>12</sub>                                               | 1676.7792               | b <sub>17</sub>                                               | 2728.2726 | y <sub>28</sub>                                 |
| 389.7196 <sup>+2</sup> | y <sub>8</sub> <sup>+2</sup>                                  | 778.4318               | y <sub>8</sub>                                                | 1154.0718 <sup>+2</sup> | b <sub>25</sub> -H <sub>3</sub> PO <sub>4</sub> <sup>+2</sup> | 1696.8402               | y <sub>17</sub>                                               | 2767.2835 | b <sub>29</sub>                                 |
| 411.7145 <sup>+2</sup> | b <sub>10</sub> -H <sub>3</sub> PO <sub>4</sub> <sup>+2</sup> | 784.8944 <sup>+2</sup> | y <sub>16</sub> <sup>+2</sup>                                 | 1167.5417 <sup>+2</sup> | b <sub>24</sub> <sup>+2</sup>                                 | 1762.8871               | b <sub>19</sub> -H <sub>3</sub> PO <sub>4</sub>               | 2785.2941 | y <sub>29</sub>                                 |
| 412.1765 <sup>+2</sup> | b <sub>9</sub> <sup>+2</sup>                                  | 789.9048 <sup>+2</sup> | b <sub>17</sub> -H <sub>3</sub> PO <sub>4</sub> <sup>+2</sup> | 1168.5705               | y <sub>12</sub>                                               | 1773.832                | b <sub>18</sub>                                               | 2843.4183 | MH-H <sub>3</sub> PO <sub>4</sub>               |
| 427.2048               | b <sub>5</sub> -H <sub>3</sub> PO <sub>4</sub>                | 810.3825 <sup>+2</sup> | b <sub>16</sub> <sup>+2</sup>                                 | 1173.5955 <sup>+2</sup> | y <sub>24</sub> <sup>+2</sup>                                 | 1793.8929               | y <sub>18</sub>                                               | 2941.3952 | MH                                              |
| 433.2356 <sup>+2</sup> | y <sub>9</sub> <sup>+2</sup>                                  | 822.4217               | b <sub>10</sub> -H <sub>3</sub> PO <sub>4</sub>               | 1189.5904 <sup>+2</sup> | b <sub>26</sub> -H <sub>3</sub> PO <sub>4</sub> <sup>+2</sup> | 1860.864                | b <sub>19</sub>                                               |           |                                                 |
| 438.1497               | b <sub>4</sub>                                                | 823.3458               | b <sub>9</sub>                                                | 1203.0603 <sup>+2</sup> | b <sub>25</sub> <sup>+2</sup>                                 | 1877.9141               | b <sub>20</sub> -H <sub>3</sub> PO <sub>4</sub>               |           |                                                 |
| 460.7029 <sup>+2</sup> | b <sub>10</sub> <sup>+2</sup>                                 | 838.4312 <sup>+2</sup> | b <sub>18</sub> -H <sub>3</sub> PO <sub>4</sub> <sup>+2</sup> | 1209.1140 <sup>+2</sup> | y <sub>25</sub> <sup>+2</sup>                                 | 1908.9199               | y <sub>19</sub>                                               |           |                                                 |
| 466.2521               | y <sub>4</sub>                                                | 838.8932 <sup>+2</sup> | b <sub>17</sub> <sup>+2</sup>                                 | 1238.1168 <sup>+2</sup> | b <sub>27</sub> -H <sub>3</sub> PO <sub>4</sub> <sup>+2</sup> | 1975.8909               | b <sub>20</sub>                                               |           |                                                 |

MS/MS Fragmentation of sISTSGPLDKEDTGR  
 Found in IPI00396063, Similar to IRLB

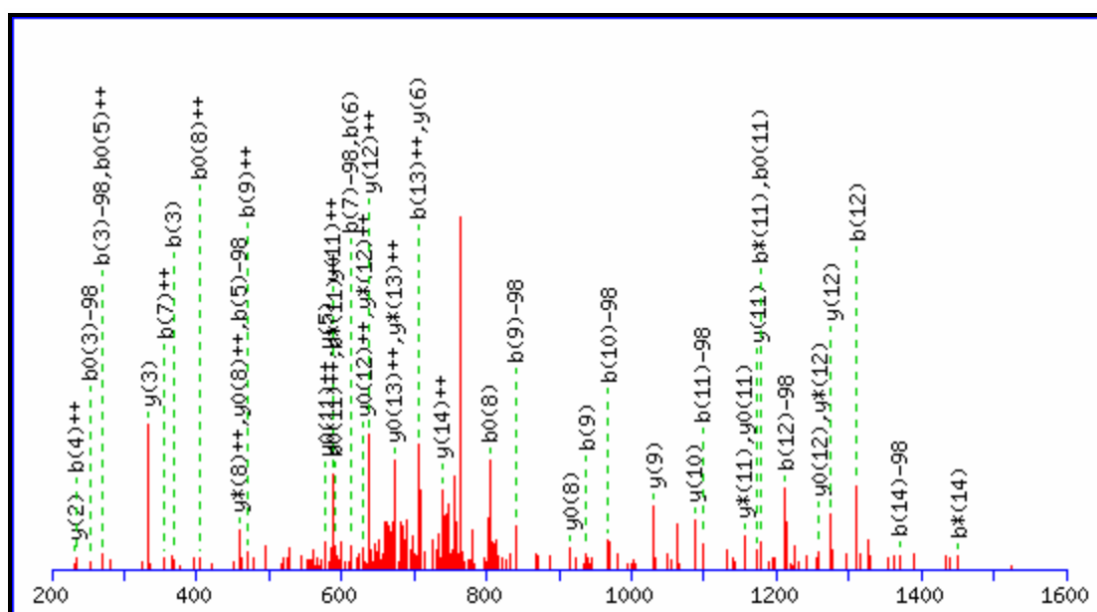

|                        |                                                |                        |                                                               |                        |                                                               |                        |                                                 |           |                                                 |
|------------------------|------------------------------------------------|------------------------|---------------------------------------------------------------|------------------------|---------------------------------------------------------------|------------------------|-------------------------------------------------|-----------|-------------------------------------------------|
| 88.0631 <sup>+2</sup>  | y <sub>1</sub> <sup>+2</sup>                   | 410.6934 <sup>+2</sup> | y <sub>7</sub> <sup>+2</sup>                                  | 598.2658 <sup>+2</sup> | b <sub>11</sub> <sup>+2</sup>                                 | 738.3705 <sup>+2</sup> | y <sub>14</sub> <sup>+2</sup>                   | 1195.5242 | b <sub>11</sub>                                 |
| 116.5738 <sup>+2</sup> | y <sub>2</sub> <sup>+2</sup>                   | 448.215                | y <sub>4</sub>                                                | 606.7908 <sup>+2</sup> | b <sub>12</sub> -H <sub>3</sub> PO <sub>4</sub> <sup>+2</sup> | 772.8812 <sup>+2</sup> | MH-H <sub>3</sub> PO <sub>4</sub> <sup>+2</sup> | 1212.5743 | b <sub>12</sub> -H <sub>3</sub> PO <sub>4</sub> |
| 167.0977 <sup>+2</sup> | y <sub>3</sub> <sup>+2</sup>                   | 458.2245               | b <sub>5</sub> -H <sub>3</sub> PO <sub>4</sub>                | 612.2988               | b <sub>7</sub> -H <sub>3</sub> PO <sub>4</sub>                | 820.3795               | y <sub>7</sub>                                  | 1275.6175 | y <sub>12</sub>                                 |
| 175.119                | y <sub>1</sub>                                 | 467.2354 <sup>+2</sup> | y <sub>8</sub> <sup>+2</sup>                                  | 613.2229               | b <sub>6</sub>                                                | 821.8696 <sup>+2</sup> | MH <sup>+2</sup>                                | 1310.5512 | b <sub>12</sub>                                 |
| 183.1128               | b <sub>2</sub> -H <sub>3</sub> PO <sub>4</sub> | 469.1694               | b <sub>4</sub>                                                | 638.3124 <sup>+2</sup> | y <sub>12</sub> <sup>+2</sup>                                 | 823.3597               | b <sub>8</sub>                                  | 1313.622  | b <sub>13</sub> -H <sub>3</sub> PO <sub>4</sub> |
| 224.6112 <sup>+2</sup> | y <sub>4</sub> <sup>+2</sup>                   | 484.7560 <sup>+2</sup> | b <sub>10</sub> -H <sub>3</sub> PO <sub>4</sub> <sup>+2</sup> | 655.7792 <sup>+2</sup> | b <sub>12</sub> <sup>+2</sup>                                 | 840.4098               | b <sub>9</sub> -H <sub>3</sub> PO <sub>4</sub>  | 1362.6496 | y <sub>13</sub>                                 |
| 232.1404               | y <sub>2</sub>                                 | 515.246                | b <sub>6</sub> -H <sub>3</sub> PO <sub>4</sub>                | 657.3146 <sup>+2</sup> | b <sub>13</sub> -H <sub>3</sub> PO <sub>4</sub> <sup>+2</sup> | 933.4636               | y <sub>8</sub>                                  | 1370.6434 | b <sub>14</sub> -H <sub>3</sub> PO <sub>4</sub> |
| 270.1448               | b <sub>3</sub> -H <sub>3</sub> PO <sub>4</sub> | 515.7618 <sup>+2</sup> | y <sub>9</sub> <sup>+2</sup>                                  | 681.8284 <sup>+2</sup> | y <sub>13</sub> <sup>+2</sup>                                 | 938.3867               | b <sub>9</sub>                                  | 1411.5988 | b <sub>13</sub>                                 |
| 281.0897               | b <sub>2</sub>                                 | 533.7445 <sup>+2</sup> | b <sub>10</sub> <sup>+2</sup>                                 | 685.8253 <sup>+2</sup> | b <sub>14</sub> -H <sub>3</sub> PO <sub>4</sub> <sup>+2</sup> | 968.5047               | b <sub>10</sub> -H <sub>3</sub> PO <sub>4</sub> | 1468.6203 | b <sub>14</sub>                                 |
| 289.1325 <sup>+2</sup> | y <sub>5</sub> <sup>+2</sup>                   | 544.2726 <sup>+2</sup> | y <sub>10</sub> <sup>+2</sup>                                 | 705.3526               | y <sub>6</sub>                                                | 1030.5164              | y <sub>9</sub>                                  | 1475.7336 | y <sub>14</sub>                                 |
| 333.1881               | y <sub>3</sub>                                 | 549.2773 <sup>+2</sup> | b <sub>11</sub> -H <sub>3</sub> PO <sub>4</sub> <sup>+2</sup> | 706.3031 <sup>+2</sup> | b <sub>13</sub> <sup>+2</sup>                                 | 1066.4816              | b <sub>10</sub>                                 | 1544.7551 | MH-H <sub>3</sub> PO <sub>4</sub>               |
| 353.1799 <sup>+2</sup> | y <sub>6</sub> <sup>+2</sup>                   | 556.2014               | b <sub>5</sub>                                                | 710.2757               | b <sub>7</sub>                                                | 1087.5378              | y <sub>10</sub>                                 | 1642.732  | MH                                              |
| 368.1217               | b <sub>3</sub>                                 | 577.2576               | y <sub>5</sub>                                                | 725.3828               | b <sub>8</sub> -H <sub>3</sub> PO <sub>4</sub>                | 1097.5473              | b <sub>11</sub> -H <sub>3</sub> PO <sub>4</sub> |           |                                                 |
| 371.1925               | b <sub>4</sub> -H <sub>3</sub> PO <sub>4</sub> | 587.7886 <sup>+2</sup> | y <sub>11</sub> <sup>+2</sup>                                 | 734.8138 <sup>+2</sup> | b <sub>14</sub> <sup>+2</sup>                                 | 1174.5699              | y <sub>11</sub>                                 |           |                                                 |

MS/MS Fragmentation of NLsGGVLMGFmLNR  
 Found in IPI00396063, Similar to IRLB

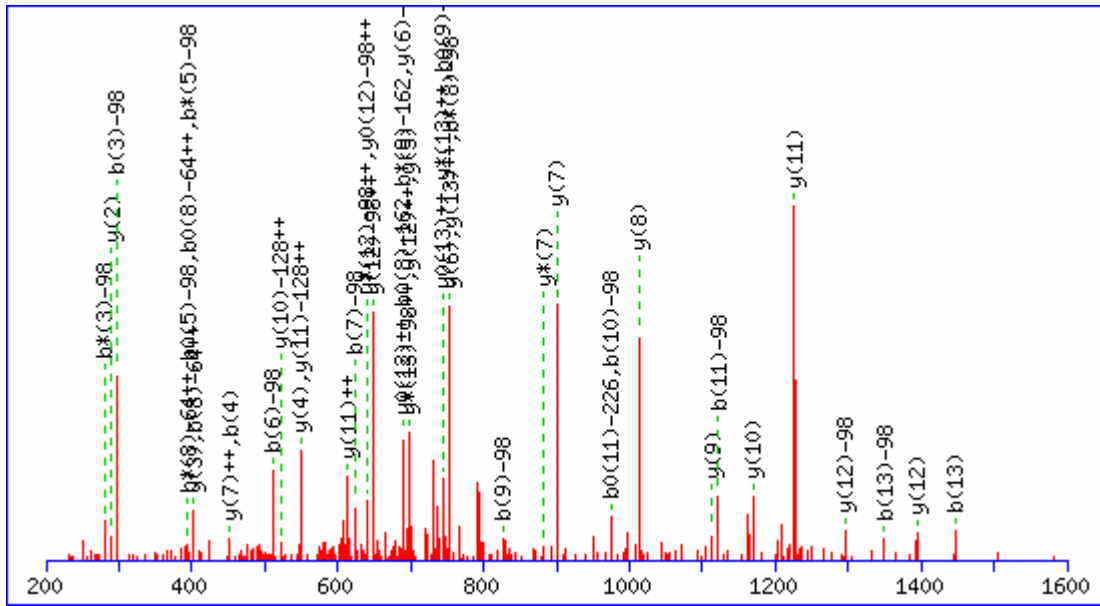

|                        |                                                |                        |                                                |                        |                                                               |           |                                                 |           |                                                 |
|------------------------|------------------------------------------------|------------------------|------------------------------------------------|------------------------|---------------------------------------------------------------|-----------|-------------------------------------------------|-----------|-------------------------------------------------|
| 88.0631 <sup>+2</sup>  | y <sub>1</sub> <sup>+2</sup>                   | 402.2459               | y <sub>3</sub>                                 | 623.3511               | b <sub>7</sub> -H <sub>3</sub> PO <sub>4</sub>                | 868.3634  | b <sub>8</sub>                                  | 1295.6235 | y <sub>12</sub> -H <sub>3</sub> PO <sub>4</sub> |
| 145.0846 <sup>+2</sup> | y <sub>2</sub> <sup>+2</sup>                   | 411.1987               | b <sub>5</sub> -H <sub>3</sub> PO <sub>4</sub> | 648.3154 <sup>+2</sup> | y <sub>12</sub> -H <sub>3</sub> PO <sub>4</sub> <sup>+2</sup> | 900.4066  | y <sub>7</sub>                                  | 1332.5728 | b <sub>12</sub>                                 |
| 175.119                | y <sub>1</sub>                                 | 450.7069 <sup>+2</sup> | y <sub>7</sub> <sup>+2</sup>                   | 696.3498               | y <sub>5</sub>                                                | 925.3849  | b <sub>9</sub>                                  | 1348.6388 | b <sub>13</sub> -H <sub>3</sub> PO <sub>4</sub> |
| 201.6266 <sup>+2</sup> | y <sub>3</sub> <sup>+2</sup>                   | 452.1541               | b <sub>4</sub>                                 | 697.3038 <sup>+2</sup> | y <sub>12</sub> <sup>+2</sup>                                 | 974.4764  | b <sub>10</sub> -H <sub>3</sub> PO <sub>4</sub> | 1393.6004 | y <sub>12</sub>                                 |
| 228.1343               | b <sub>2</sub>                                 | 507.2490 <sup>+2</sup> | y <sub>8</sub> <sup>+2</sup>                   | 704.8574 <sup>+2</sup> | y <sub>13</sub> -H <sub>3</sub> PO <sub>4</sub> <sup>+2</sup> | 1013.4907 | y <sub>8</sub>                                  | 1408.7076 | y <sub>13</sub> -H <sub>3</sub> PO <sub>4</sub> |
| 275.1443 <sup>+2</sup> | y <sub>4</sub> <sup>+2</sup>                   | 509.1756               | b <sub>5</sub>                                 | 721.328                | b <sub>7</sub>                                                | 1072.4533 | b <sub>10</sub>                                 | 1446.6157 | b <sub>13</sub>                                 |
| 289.1619               | y <sub>2</sub>                                 | 510.2671               | b <sub>6</sub> -H <sub>3</sub> PO <sub>4</sub> | 753.3712               | y <sub>6</sub>                                                | 1112.5591 | y <sub>9</sub>                                  | 1506.6844 | y <sub>13</sub>                                 |
| 297.1557               | b <sub>3</sub> -H <sub>3</sub> PO <sub>4</sub> | 549.2813               | y <sub>4</sub>                                 | 753.8459 <sup>+2</sup> | y <sub>13</sub> <sup>+2</sup>                                 | 1121.5118 | b <sub>11</sub> -H <sub>3</sub> PO <sub>4</sub> | 1522.7505 | MH-H <sub>3</sub> PO <sub>4</sub>               |
| 348.6785 <sup>+2</sup> | y <sub>5</sub> <sup>+2</sup>                   | 556.7832 <sup>+2</sup> | y <sub>9</sub> <sup>+2</sup>                   | 761.8789 <sup>+2</sup> | MH-H <sub>3</sub> PO <sub>4</sub> <sup>+2</sup>               | 1169.5806 | y <sub>10</sub>                                 | 1620.7274 | MH                                              |
| 354.1772               | b <sub>4</sub> -H <sub>3</sub> PO <sub>4</sub> | 585.2939 <sup>+2</sup> | y <sub>10</sub> <sup>+2</sup>                  | 770.3865               | b <sub>8</sub> -H <sub>3</sub> PO <sub>4</sub>                | 1219.4887 | b <sub>11</sub>                                 |           |                                                 |
| 377.1892 <sup>+2</sup> | y <sub>6</sub> <sup>+2</sup>                   | 608.244                | b <sub>6</sub>                                 | 810.8673 <sup>+2</sup> | MH <sup>+2</sup>                                              | 1226.602  | y <sub>11</sub>                                 |           |                                                 |
| 395.1326               | b <sub>3</sub>                                 | 613.8047 <sup>+2</sup> | y <sub>11</sub> <sup>+2</sup>                  | 827.408                | b <sub>9</sub> -H <sub>3</sub> PO <sub>4</sub>                | 1234.5959 | b <sub>12</sub> -H <sub>3</sub> PO <sub>4</sub> |           |                                                 |



MS/MS Fragmentation of HKsDNETNLQQVWVWGNR  
 Found in IPI00396063, Similar to IRLB

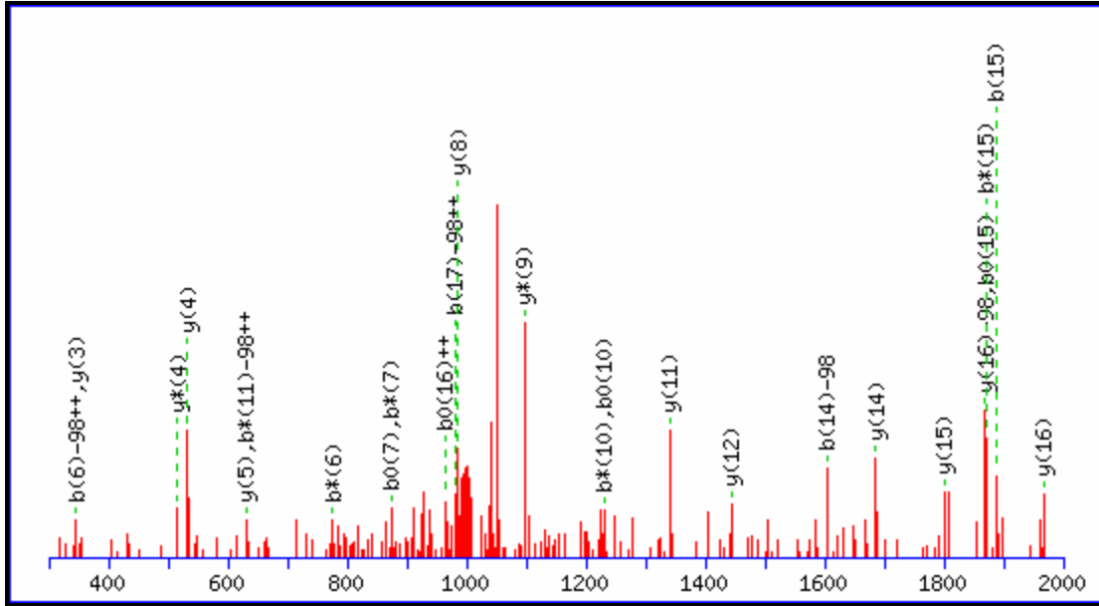

|                        |                                                              |                        |                                                               |                        |                                                               |                         |                                                               |           |                                                 |
|------------------------|--------------------------------------------------------------|------------------------|---------------------------------------------------------------|------------------------|---------------------------------------------------------------|-------------------------|---------------------------------------------------------------|-----------|-------------------------------------------------|
| 88.0631 <sup>+2</sup>  | y <sub>1</sub> <sup>+2</sup>                                 | 429.7327 <sup>+2</sup> | y <sub>7</sub> <sup>+2</sup>                                  | 693.2951               | b <sub>6</sub> -H <sub>3</sub> PO <sub>4</sub>                | 972.9336 <sup>+2</sup>  | b <sub>16</sub> <sup>+2</sup>                                 | 1503.6224 | b <sub>12</sub>                                 |
| 133.5842 <sup>+2</sup> | b <sub>2</sub> <sup>+2</sup>                                 | 433.1595               | b <sub>3</sub>                                                | 703.3264 <sup>+2</sup> | b <sub>12</sub> -H <sub>3</sub> PO <sub>4</sub> <sup>+2</sup> | 980.9666 <sup>+2</sup>  | b <sub>17</sub> -H <sub>3</sub> PO <sub>4</sub> <sup>+2</sup> | 1504.7139 | b <sub>13</sub> -H <sub>3</sub> PO <sub>4</sub> |
| 145.0846 <sup>+2</sup> | y <sub>2</sub> <sup>+2</sup>                                 | 446.6635 <sup>+2</sup> | b <sub>7</sub> <sup>+2</sup>                                  | 721.8786 <sup>+2</sup> | y <sub>12</sub> <sup>+2</sup>                                 | 984.4340 <sup>+2</sup>  | y <sub>16</sub> <sup>+2</sup>                                 | 1571.7925 | y <sub>13</sub>                                 |
| 168.0949 <sup>+2</sup> | b <sub>3</sub> -H <sub>3</sub> PO <sub>4</sub> <sup>+2</sup> | 450.2096               | b <sub>4</sub> -H <sub>3</sub> PO <sub>4</sub>                | 730.3995               | y <sub>6</sub>                                                | 986.5166                | y <sub>8</sub>                                                | 1602.6908 | b <sub>13</sub>                                 |
| 173.5953 <sup>+2</sup> | y <sub>3</sub> <sup>+2</sup>                                 | 454.6965 <sup>+2</sup> | b <sub>8</sub> -H <sub>3</sub> PO <sub>4</sub> <sup>+2</sup>  | 752.3148 <sup>+2</sup> | b <sub>12</sub> <sup>+2</sup>                                 | 999.4930 <sup>+2</sup>  | y <sub>17</sub> -H <sub>3</sub> PO <sub>4</sub> <sup>+2</sup> | 1603.7823 | b <sub>14</sub> -H <sub>3</sub> PO <sub>4</sub> |
| 175.119                | y <sub>1</sub>                                               | 493.7620 <sup>+2</sup> | y <sub>8</sub> <sup>+2</sup>                                  | 752.8606 <sup>+2</sup> | b <sub>13</sub> -H <sub>3</sub> PO <sub>4</sub> <sup>+2</sup> | 1006.3626               | b <sub>8</sub>                                                | 1685.8354 | y <sub>14</sub>                                 |
| 217.0834 <sup>+2</sup> | b <sub>3</sub> <sup>+2</sup>                                 | 503.6849 <sup>+2</sup> | b <sub>8</sub> <sup>+2</sup>                                  | 786.3999 <sup>+2</sup> | y <sub>13</sub> <sup>+2</sup>                                 | 1021.4697               | b <sub>9</sub> -H <sub>3</sub> PO <sub>4</sub>                | 1701.7592 | b <sub>14</sub>                                 |
| 225.6084 <sup>+2</sup> | b <sub>4</sub> -H <sub>3</sub> PO <sub>4</sub> <sup>+2</sup> | 511.2385 <sup>+2</sup> | b <sub>9</sub> -H <sub>3</sub> PO <sub>4</sub> <sup>+2</sup>  | 791.272                | b <sub>6</sub>                                                | 1029.9551 <sup>+2</sup> | b <sub>17</sub> <sup>+2</sup>                                 | 1789.8616 | b <sub>15</sub> -H <sub>3</sub> PO <sub>4</sub> |
| 266.1612               | b <sub>2</sub>                                               | 532.2627               | y <sub>4</sub>                                                | 794.3428               | b <sub>7</sub> -H <sub>3</sub> PO <sub>4</sub>                | 1048.4815 <sup>+2</sup> | y <sub>17</sub> <sup>+2</sup>                                 | 1800.8624 | y <sub>15</sub>                                 |
| 266.6350 <sup>+2</sup> | y <sub>4</sub> <sup>+2</sup>                                 | 548.1865               | b <sub>4</sub>                                                | 801.8490 <sup>+2</sup> | b <sub>13</sub> <sup>+2</sup>                                 | 1068.0225 <sup>+2</sup> | MH-H <sub>3</sub> PO <sub>4</sub> <sup>+2</sup>               | 1846.8831 | b <sub>16</sub> -H <sub>3</sub> PO <sub>4</sub> |
| 274.5969 <sup>+2</sup> | b <sub>4</sub> <sup>+2</sup>                                 | 557.7912 <sup>+2</sup> | y <sub>9</sub> <sup>+2</sup>                                  | 802.3948 <sup>+2</sup> | b <sub>14</sub> -H <sub>3</sub> PO <sub>4</sub> <sup>+2</sup> | 1114.5752               | y <sub>9</sub>                                                | 1869.8838 | y <sub>16</sub> -H <sub>3</sub> PO <sub>4</sub> |
| 282.6299 <sup>+2</sup> | b <sub>5</sub> -H <sub>3</sub> PO <sub>4</sub> <sup>+2</sup> | 560.2270 <sup>+2</sup> | b <sub>9</sub> <sup>+2</sup>                                  | 843.4213 <sup>+2</sup> | y <sub>14</sub> <sup>+2</sup>                                 | 1117.0109 <sup>+2</sup> | MH <sup>+2</sup>                                              | 1887.8385 | b <sub>15</sub>                                 |
| 289.1619               | y <sub>2</sub>                                               | 564.2525               | b <sub>5</sub> -H <sub>3</sub> PO <sub>4</sub>                | 851.3832 <sup>+2</sup> | b <sub>14</sub> <sup>+2</sup>                                 | 1119.4466               | b <sub>9</sub>                                                | 1944.86   | b <sub>16</sub>                                 |
| 316.1692 <sup>+2</sup> | y <sub>5</sub> <sup>+2</sup>                                 | 575.2678 <sup>+2</sup> | b <sub>10</sub> -H <sub>3</sub> PO <sub>4</sub> <sup>+2</sup> | 858.4581               | y <sub>7</sub>                                                | 1149.5283               | b <sub>10</sub> -H <sub>3</sub> PO <sub>4</sub>               | 1960.926  | b <sub>17</sub> -H <sub>3</sub> PO <sub>4</sub> |
| 331.6183 <sup>+2</sup> | b <sub>5</sub> <sup>+2</sup>                                 | 614.3333 <sup>+2</sup> | y <sub>10</sub> <sup>+2</sup>                                 | 892.3197               | b <sub>7</sub>                                                | 1227.6593               | y <sub>10</sub>                                               | 1967.8607 | y <sub>16</sub>                                 |
| 335.1826               | b <sub>3</sub> -H <sub>3</sub> PO <sub>4</sub>               | 624.2562 <sup>+2</sup> | b <sub>10</sub> <sup>+2</sup>                                 | 895.4344 <sup>+2</sup> | b <sub>15</sub> -H <sub>3</sub> PO <sub>4</sub> <sup>+2</sup> | 1247.5052               | b <sub>10</sub>                                               | 1997.9788 | y <sub>17</sub> -H <sub>3</sub> PO <sub>4</sub> |
| 346.1833               | y <sub>3</sub>                                               | 631.3311               | y <sub>5</sub>                                                | 900.9348 <sup>+2</sup> | y <sub>15</sub> <sup>+2</sup>                                 | 1277.5869               | b <sub>11</sub> -H <sub>3</sub> PO <sub>4</sub>               | 2058.9029 | b <sub>17</sub>                                 |
| 347.1512 <sup>+2</sup> | b <sub>6</sub> -H <sub>3</sub> PO <sub>4</sub> <sup>+2</sup> | 639.2971 <sup>+2</sup> | b <sub>11</sub> -H <sub>3</sub> PO <sub>4</sub> <sup>+2</sup> | 908.3857               | b <sub>8</sub> -H <sub>3</sub> PO <sub>4</sub>                | 1341.7022               | y <sub>11</sub>                                               | 2095.9557 | y <sub>17</sub>                                 |
| 365.7034 <sup>+2</sup> | y <sub>6</sub> <sup>+2</sup>                                 | 662.2294               | b <sub>5</sub>                                                | 923.9452 <sup>+2</sup> | b <sub>16</sub> -H <sub>3</sub> PO <sub>4</sub> <sup>+2</sup> | 1375.5638               | b <sub>11</sub>                                               | 2135.0377 | MH-H <sub>3</sub> PO <sub>4</sub>               |
| 396.1396 <sup>+2</sup> | b <sub>6</sub> <sup>+2</sup>                                 | 671.3547 <sup>+2</sup> | y <sub>11</sub> <sup>+2</sup>                                 | 935.4455 <sup>+2</sup> | y <sub>16</sub> -H <sub>3</sub> PO <sub>4</sub> <sup>+2</sup> | 1405.6455               | b <sub>12</sub> -H <sub>3</sub> PO <sub>4</sub>               | 2233.0146 | MH                                              |
| 397.6750 <sup>+2</sup> | b <sub>7</sub> -H <sub>3</sub> PO <sub>4</sub> <sup>+2</sup> | 688.2855 <sup>+2</sup> | b <sub>11</sub> <sup>+2</sup>                                 | 944.4229 <sup>+2</sup> | b <sub>15</sub> <sup>+2</sup>                                 | 1442.7499               | y <sub>12</sub>                                               |           |                                                 |

MS/MS Fragmentation of RGEsLDNLDSPR  
 Found in IPI00409590, Isoform 1 of LIM domain only protein 7

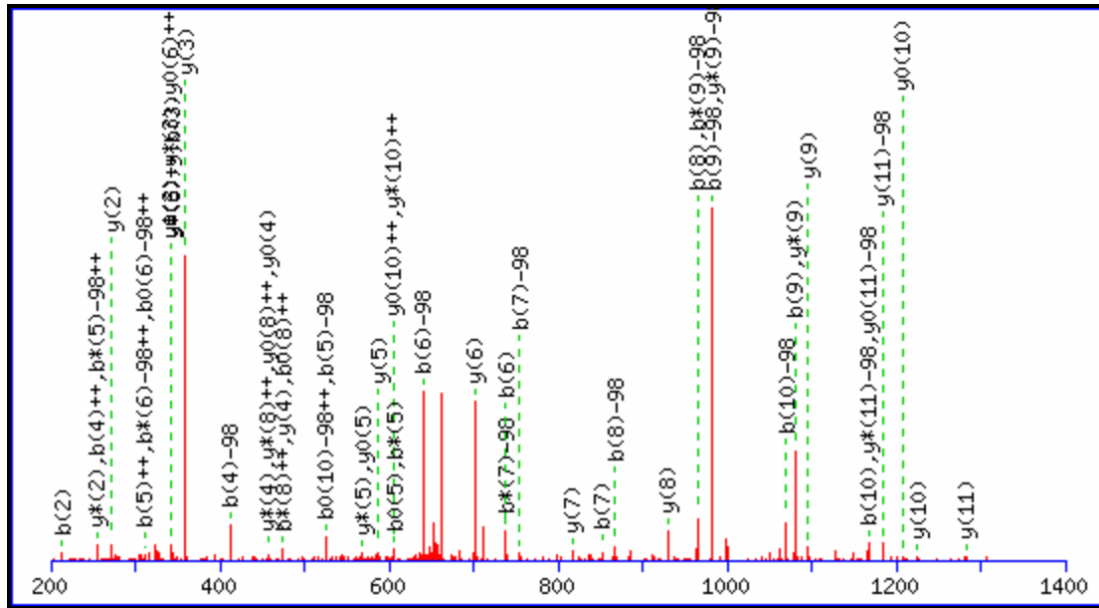

|                        |                                                              |                        |                                                              |                        |                                                               |                        |                                                 |           |                                                 |
|------------------------|--------------------------------------------------------------|------------------------|--------------------------------------------------------------|------------------------|---------------------------------------------------------------|------------------------|-------------------------------------------------|-----------|-------------------------------------------------|
| 88.0631 <sup>+2</sup>  | y <sub>1</sub> <sup>+2</sup>                                 | 320.6561 <sup>+2</sup> | b <sub>6</sub> -H <sub>3</sub> PO <sub>4</sub> <sup>+2</sup> | 499.7487 <sup>+2</sup> | y <sub>9</sub> -H <sub>3</sub> PO <sub>4</sub> <sup>+2</sup>  | 640.3049               | b <sub>6</sub> -H <sub>3</sub> PO <sub>4</sub>  | 1069.4909 | b <sub>10</sub> -H <sub>3</sub> PO <sub>4</sub> |
| 107.5686 <sup>+2</sup> | b <sub>2</sub> <sup>+2</sup>                                 | 343.1724               | b <sub>3</sub>                                               | 510.1708               | b <sub>4</sub>                                                | 641.7692 <sup>+2</sup> | y <sub>11</sub> <sup>+2</sup>                   | 1080.4357 | b <sub>9</sub>                                  |
| 136.5895 <sup>+2</sup> | y <sub>2</sub> <sup>+2</sup>                                 | 351.1825 <sup>+2</sup> | y <sub>6</sub> <sup>+2</sup>                                 | 525.278                | b <sub>5</sub> -H <sub>3</sub> PO <sub>4</sub>                | 670.8313 <sup>+2</sup> | MH-H <sub>3</sub> PO <sub>4</sub> <sup>+2</sup> | 1096.467  | y <sub>9</sub>                                  |
| 172.0899 <sup>+2</sup> | b <sub>3</sub> <sup>+2</sup>                                 | 359.2037               | y <sub>3</sub>                                               | 535.2491 <sup>+2</sup> | b <sub>10</sub> -H <sub>3</sub> PO <sub>4</sub> <sup>+2</sup> | 701.3577               | y <sub>6</sub>                                  | 1127.5327 | y <sub>10</sub> -H <sub>3</sub> PO <sub>4</sub> |
| 175.119                | y <sub>1</sub>                                               | 369.6445 <sup>+2</sup> | b <sub>6</sub> <sup>+2</sup>                                 | 540.7215 <sup>+2</sup> | b <sub>9</sub> <sup>+2</sup>                                  | 719.8197 <sup>+2</sup> | MH <sup>+2</sup>                                | 1166.5436 | b <sub>11</sub> -H <sub>3</sub> PO <sub>4</sub> |
| 180.1055 <sup>+2</sup> | y <sub>3</sub> <sup>+2</sup>                                 | 377.6776 <sup>+2</sup> | b <sub>7</sub> -H <sub>3</sub> PO <sub>4</sub> <sup>+2</sup> | 548.7372 <sup>+2</sup> | y <sub>9</sub> <sup>+2</sup>                                  | 738.2818               | b <sub>6</sub>                                  | 1167.4678 | b <sub>10</sub>                                 |
| 206.6006 <sup>+2</sup> | b <sub>4</sub> -H <sub>3</sub> PO <sub>4</sub> <sup>+2</sup> | 408.6959 <sup>+2</sup> | y <sub>7</sub> <sup>+2</sup>                                 | 564.2700 <sup>+2</sup> | y <sub>10</sub> -H <sub>3</sub> PO <sub>4</sub> <sup>+2</sup> | 754.3478               | b <sub>7</sub> -H <sub>3</sub> PO <sub>4</sub>  | 1184.5542 | y <sub>11</sub> -H <sub>3</sub> PO <sub>4</sub> |
| 214.1299               | b <sub>2</sub>                                               | 412.1939               | b <sub>4</sub> -H <sub>3</sub> PO <sub>4</sub>               | 583.7755 <sup>+2</sup> | b <sub>11</sub> -H <sub>3</sub> PO <sub>4</sub> <sup>+2</sup> | 816.3846               | y <sub>7</sub>                                  | 1225.5096 | y <sub>10</sub>                                 |
| 237.6190 <sup>+2</sup> | y <sub>4</sub> <sup>+2</sup>                                 | 426.6660 <sup>+2</sup> | b <sub>7</sub> <sup>+2</sup>                                 | 584.2375 <sup>+2</sup> | b <sub>10</sub> <sup>+2</sup>                                 | 852.3247               | b <sub>7</sub>                                  | 1264.5205 | b <sub>11</sub>                                 |
| 255.5890 <sup>+2</sup> | b <sub>4</sub> <sup>+2</sup>                                 | 434.2196 <sup>+2</sup> | b <sub>8</sub> -H <sub>3</sub> PO <sub>4</sub> <sup>+2</sup> | 587.3148               | y <sub>5</sub>                                                | 867.4319               | b <sub>8</sub> -H <sub>3</sub> PO <sub>4</sub>  | 1282.5311 | y <sub>11</sub>                                 |
| 263.1426 <sup>+2</sup> | b <sub>5</sub> -H <sub>3</sub> PO <sub>4</sub> <sup>+2</sup> | 465.2380 <sup>+2</sup> | y <sub>8</sub> <sup>+2</sup>                                 | 592.7807 <sup>+2</sup> | y <sub>11</sub> -H <sub>3</sub> PO <sub>4</sub> <sup>+2</sup> | 929.4687               | y <sub>8</sub>                                  | 1340.6553 | MH-H <sub>3</sub> PO <sub>4</sub>               |
| 272.1717               | y <sub>2</sub>                                               | 474.2307               | y <sub>4</sub>                                               | 613.2585 <sup>+2</sup> | y <sub>10</sub> <sup>+2</sup>                                 | 965.4088               | b <sub>8</sub>                                  | 1438.6322 | MH                                              |
| 294.1610 <sup>+2</sup> | y <sub>5</sub> <sup>+2</sup>                                 | 483.2080 <sup>+2</sup> | b <sub>8</sub> <sup>+2</sup>                                 | 623.2549               | b <sub>5</sub>                                                | 982.4588               | b <sub>9</sub> -H <sub>3</sub> PO <sub>4</sub>  |           |                                                 |
| 312.1311 <sup>+2</sup> | b <sub>5</sub> <sup>+2</sup>                                 | 491.7331 <sup>+2</sup> | b <sub>9</sub> -H <sub>3</sub> PO <sub>4</sub> <sup>+2</sup> | 632.7639 <sup>+2</sup> | b <sub>11</sub> <sup>+2</sup>                                 | 998.4901               | y <sub>9</sub> -H <sub>3</sub> PO <sub>4</sub>  |           |                                                 |

MS/MS Fragmentation of TDTVRLTsVVTPRPFGSQTR  
 Found in IPI00409590, Isoform 1 of LIM domain only protein 7

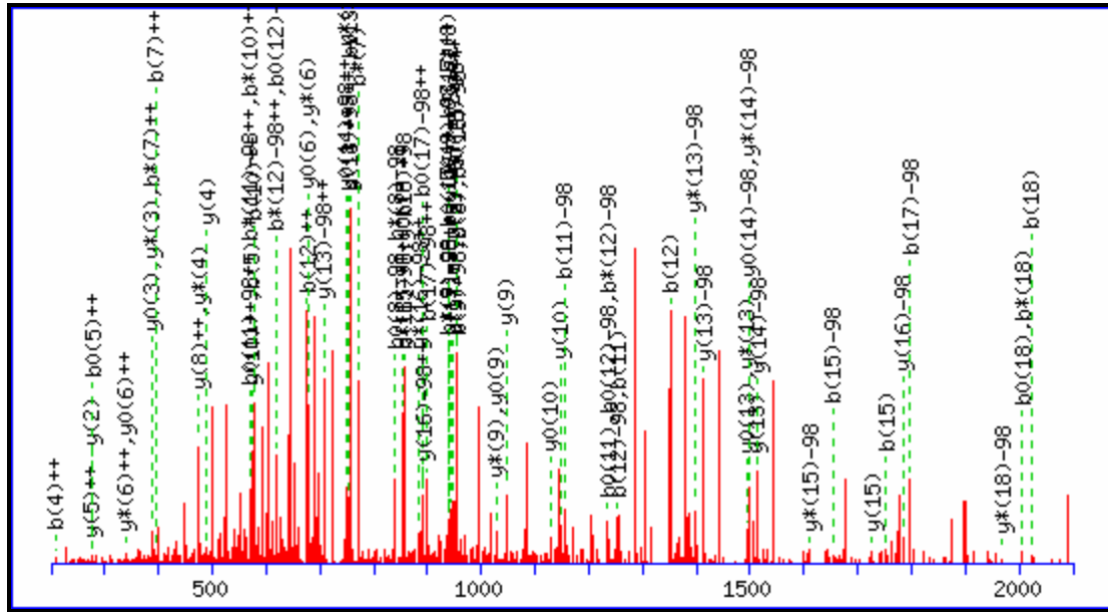

|                        |                                                              |                        |                                                               |                         |                                                               |                         |                                                 |           |                                                 |
|------------------------|--------------------------------------------------------------|------------------------|---------------------------------------------------------------|-------------------------|---------------------------------------------------------------|-------------------------|-------------------------------------------------|-----------|-------------------------------------------------|
| 88.0631 <sup>+2</sup>  | y <sub>1</sub> <sup>+2</sup>                                 | 527.7982 <sup>+2</sup> | b <sub>10</sub> -H <sub>3</sub> PO <sub>4</sub> <sup>+2</sup> | 814.4494 <sup>+2</sup>  | y <sub>15</sub> -H <sub>3</sub> PO <sub>4</sub> <sup>+2</sup> | 1053.4976               | b <sub>9</sub>                                  | 1652.9119 | b <sub>15</sub> -H <sub>3</sub> PO <sub>4</sub> |
| 138.5870 <sup>+2</sup> | y <sub>2</sub> <sup>+2</sup>                                 | 548.2787               | y <sub>5</sub>                                                | 826.9596 <sup>+2</sup>  | b <sub>15</sub> -H <sub>3</sub> PO <sub>4</sub> <sup>+2</sup> | 1054.5891               | b <sub>10</sub> -H <sub>3</sub> PO <sub>4</sub> | 1709.9333 | b <sub>16</sub> -H <sub>3</sub> PO <sub>4</sub> |
| 175.119                | y <sub>1</sub>                                               | 573.2991               | b <sub>5</sub>                                                | 855.4703 <sup>+2</sup>  | b <sub>16</sub> -H <sub>3</sub> PO <sub>4</sub> <sup>+2</sup> | 1062.5279 <sup>+2</sup> | b <sub>19</sub> <sup>+2</sup>                   | 1725.8684 | y <sub>15</sub>                                 |
| 202.6162 <sup>+2</sup> | y <sub>3</sub> <sup>+2</sup>                                 | 573.8044 <sup>+2</sup> | y <sub>10</sub> <sup>+2</sup>                                 | 856.4523                | b <sub>8</sub> -H <sub>3</sub> PO <sub>4</sub>                | 1099.0599 <sup>+2</sup> | y <sub>19</sub> <sup>+2</sup>                   | 1750.8888 | b <sub>15</sub>                                 |
| 217.0819               | b <sub>2</sub>                                               | 576.7867 <sup>+2</sup> | b <sub>10</sub> <sup>+2</sup>                                 | 863.4378 <sup>+2</sup>  | y <sub>15</sub> <sup>+2</sup>                                 | 1100.5953 <sup>+2</sup> | MH-H <sub>3</sub> PO <sub>4</sub> <sup>+2</sup> | 1783.9926 | y <sub>16</sub> -H <sub>3</sub> PO <sub>4</sub> |
| 246.1323 <sup>+2</sup> | y <sub>4</sub> <sup>+2</sup>                                 | 578.3220 <sup>+2</sup> | b <sub>11</sub> -H <sub>3</sub> PO <sub>4</sub> <sup>+2</sup> | 875.9480 <sup>+2</sup>  | b <sub>15</sub> <sup>+2</sup>                                 | 1146.6014               | y <sub>10</sub>                                 | 1796.9654 | b <sub>17</sub> -H <sub>3</sub> PO <sub>4</sub> |
| 274.6430 <sup>+2</sup> | y <sub>5</sub> <sup>+2</sup>                                 | 623.3386 <sup>+2</sup> | y <sub>11</sub> <sup>+2</sup>                                 | 892.4999 <sup>+2</sup>  | y <sub>16</sub> -H <sub>3</sub> PO <sub>4</sub> <sup>+2</sup> | 1149.5837 <sup>+2</sup> | MH <sup>+2</sup>                                | 1807.9102 | b <sub>16</sub>                                 |
| 276.1666               | y <sub>2</sub>                                               | 626.8484 <sup>+2</sup> | b <sub>12</sub> -H <sub>3</sub> PO <sub>4</sub> <sup>+2</sup> | 898.9863 <sup>+2</sup>  | b <sub>17</sub> -H <sub>3</sub> PO <sub>4</sub> <sup>+2</sup> | 1152.566                | b <sub>10</sub>                                 | 1881.9695 | y <sub>16</sub>                                 |
| 287.1532 <sup>+2</sup> | b <sub>5</sub> <sup>+2</sup>                                 | 627.3105 <sup>+2</sup> | b <sub>11</sub> <sup>+2</sup>                                 | 904.4588 <sup>+2</sup>  | b <sub>16</sub> <sup>+2</sup>                                 | 1155.6368               | b <sub>11</sub> -H <sub>3</sub> PO <sub>4</sub> | 1883.061  | y <sub>17</sub> -H <sub>3</sub> PO <sub>4</sub> |
| 318.1296               | b <sub>3</sub>                                               | 672.8728 <sup>+2</sup> | y <sub>12</sub> <sup>+2</sup>                                 | 941.4884 <sup>+2</sup>  | y <sub>16</sub> <sup>+2</sup>                                 | 1245.6698               | y <sub>11</sub>                                 | 1894.9423 | b <sub>17</sub>                                 |
| 343.6952 <sup>+2</sup> | b <sub>6</sub> <sup>+2</sup>                                 | 675.8369 <sup>+2</sup> | b <sub>12</sub> <sup>+2</sup>                                 | 942.0341 <sup>+2</sup>  | y <sub>17</sub> -H <sub>3</sub> PO <sub>4</sub> <sup>+2</sup> | 1252.6896               | b <sub>12</sub> -H <sub>3</sub> PO <sub>4</sub> | 1925.0239 | b <sub>18</sub> -H <sub>3</sub> PO <sub>4</sub> |
| 348.1772 <sup>+2</sup> | y <sub>6</sub> <sup>+2</sup>                                 | 686.3832               | b <sub>6</sub>                                                | 947.9748 <sup>+2</sup>  | b <sub>17</sub> <sup>+2</sup>                                 | 1253.6137               | b <sub>11</sub>                                 | 1981.0379 | y <sub>17</sub>                                 |
| 394.2191 <sup>+2</sup> | b <sub>7</sub> <sup>+2</sup>                                 | 695.3471               | y <sub>6</sub>                                                | 948.501                 | y <sub>8</sub>                                                | 1344.7383               | y <sub>12</sub>                                 | 1984.1087 | y <sub>18</sub> -H <sub>3</sub> PO <sub>4</sub> |
| 396.7036 <sup>+2</sup> | y <sub>7</sub> <sup>+2</sup>                                 | 704.8990 <sup>+2</sup> | b <sub>13</sub> -H <sub>3</sub> PO <sub>4</sub> <sup>+2</sup> | 954.4292                | b <sub>8</sub>                                                | 1350.6665               | b <sub>12</sub>                                 | 2023.0008 | b <sub>18</sub>                                 |
| 404.2252               | y <sub>3</sub>                                               | 707.3835 <sup>+2</sup> | y <sub>13</sub> -H <sub>3</sub> PO <sub>4</sub> <sup>+2</sup> | 955.5207                | b <sub>9</sub> -H <sub>3</sub> PO <sub>4</sub>                | 1408.7907               | b <sub>13</sub> -H <sub>3</sub> PO <sub>4</sub> | 2026.0716 | b <sub>19</sub> -H <sub>3</sub> PO <sub>4</sub> |
| 417.198                | b <sub>4</sub>                                               | 753.4254 <sup>+2</sup> | b <sub>14</sub> -H <sub>3</sub> PO <sub>4</sub> <sup>+2</sup> | 963.0156 <sup>+2</sup>  | b <sub>18</sub> -H <sub>3</sub> PO <sub>4</sub> <sup>+2</sup> | 1413.7597               | y <sub>13</sub> -H <sub>3</sub> PO <sub>4</sub> | 2082.0856 | y <sub>18</sub>                                 |
| 428.7298 <sup>+2</sup> | b <sub>8</sub> -H <sub>3</sub> PO <sub>4</sub> <sup>+2</sup> | 753.8874 <sup>+2</sup> | b <sub>13</sub> <sup>+2</sup>                                 | 991.0226 <sup>+2</sup>  | y <sub>17</sub> <sup>+2</sup>                                 | 1505.8435               | b <sub>14</sub> -H <sub>3</sub> PO <sub>4</sub> | 2099.1356 | y <sub>19</sub> -H <sub>3</sub> PO <sub>4</sub> |
| 474.7541 <sup>+2</sup> | y <sub>8</sub> <sup>+2</sup>                                 | 756.3719 <sup>+2</sup> | y <sub>13</sub> <sup>+2</sup>                                 | 992.5580 <sup>+2</sup>  | y <sub>18</sub> -H <sub>3</sub> PO <sub>4</sub> <sup>+2</sup> | 1506.7676               | b <sub>13</sub>                                 | 2124.0485 | b <sub>19</sub>                                 |
| 477.7182 <sup>+2</sup> | b <sub>8</sub> <sup>+2</sup>                                 | 757.9073 <sup>+2</sup> | y <sub>14</sub> -H <sub>3</sub> PO <sub>4</sub> <sup>+2</sup> | 1012.0041 <sup>+2</sup> | b <sub>18</sub> <sup>+2</sup>                                 | 1511.7366               | y <sub>13</sub>                                 | 2197.1125 | y <sub>19</sub>                                 |
| 478.2640 <sup>+2</sup> | b <sub>9</sub> -H <sub>3</sub> PO <sub>4</sub> <sup>+2</sup> | 787.4308               | b <sub>7</sub>                                                | 1013.5394 <sup>+2</sup> | b <sub>19</sub> -H <sub>3</sub> PO <sub>4</sub> <sup>+2</sup> | 1514.8074               | y <sub>14</sub> -H <sub>3</sub> PO <sub>4</sub> | 2200.1833 | MH-H <sub>3</sub> PO <sub>4</sub>               |
| 491.2572               | y <sub>4</sub>                                               | 792.3999               | y <sub>7</sub>                                                | 1041.5464 <sup>+2</sup> | y <sub>18</sub> <sup>+2</sup>                                 | 1603.8203               | b <sub>14</sub>                                 | 2298.1602 | MH                                              |
| 523.2805 <sup>+2</sup> | y <sub>9</sub> <sup>+2</sup>                                 | 802.4138 <sup>+2</sup> | b <sub>14</sub> <sup>+2</sup>                                 | 1045.5538               | y <sub>9</sub>                                                | 1612.7843               | y <sub>14</sub>                                 |           |                                                 |
| 527.2524 <sup>+2</sup> | b <sub>9</sub> <sup>+2</sup>                                 | 806.8958 <sup>+2</sup> | y <sub>14</sub> <sup>+2</sup>                                 | 1050.0714 <sup>+2</sup> | y <sub>19</sub> -H <sub>3</sub> PO <sub>4</sub> <sup>+2</sup> | 1627.8915               | y <sub>15</sub> -H <sub>3</sub> PO <sub>4</sub> |           |                                                 |

MS/MS Fragmentation of SAsVNKEPVSLPGImR  
 Found in IPI00409590, Isoform 1 of LIM domain only protein 7

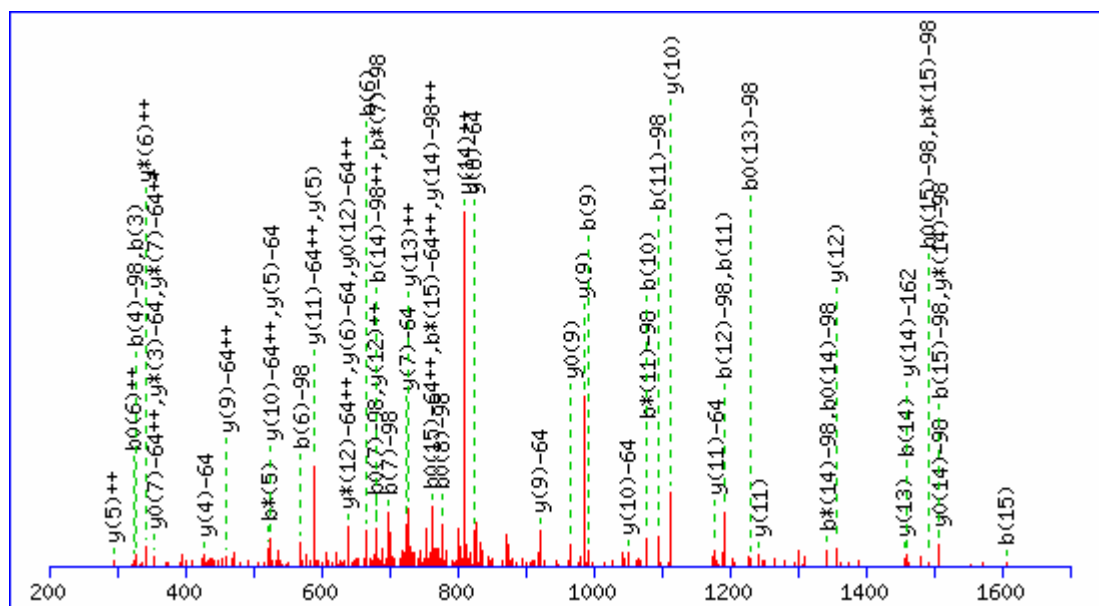

|                        |                                                              |                        |                                                               |                        |                                                               |                        |                                                               |           |                                                 |
|------------------------|--------------------------------------------------------------|------------------------|---------------------------------------------------------------|------------------------|---------------------------------------------------------------|------------------------|---------------------------------------------------------------|-----------|-------------------------------------------------|
| 88.0631 <sup>+2</sup>  | y <sub>1</sub> <sup>+2</sup>                                 | 398.6655 <sup>+2</sup> | b <sub>7</sub> <sup>+2</sup>                                  | 596.3220 <sup>+2</sup> | b <sub>12</sub> -H <sub>3</sub> PO <sub>4</sub> <sup>+2</sup> | 796.3237               | b <sub>7</sub>                                                | 1192.5609 | b <sub>11</sub>                                 |
| 159.0764               | b <sub>2</sub>                                               | 425.1432               | b <sub>4</sub>                                                | 596.7841 <sup>+2</sup> | b <sub>11</sub> <sup>+2</sup>                                 | 798.4323 <sup>+2</sup> | y <sub>15</sub> -H <sub>3</sub> PO <sub>4</sub> <sup>+2</sup> | 1242.6875 | y <sub>11</sub>                                 |
| 161.5808 <sup>+2</sup> | y <sub>2</sub> <sup>+2</sup>                                 | 435.2384               | y <sub>3</sub>                                                | 621.8474 <sup>+2</sup> | y <sub>11</sub> <sup>+2</sup>                                 | 803.8810 <sup>+2</sup> | b <sub>15</sub> <sup>+2</sup>                                 | 1248.6583 | b <sub>13</sub> -H <sub>3</sub> PO <sub>4</sub> |
| 175.119                | y <sub>1</sub>                                               | 441.2092               | b <sub>5</sub> -H <sub>3</sub> PO <sub>4</sub>                | 624.8328 <sup>+2</sup> | b <sub>13</sub> -H <sub>3</sub> PO <sub>4</sub> <sup>+2</sup> | 811.9022 <sup>+2</sup> | y <sub>14</sub> <sup>+2</sup>                                 | 1289.6137 | b <sub>12</sub>                                 |
| 218.1228 <sup>+2</sup> | y <sub>3</sub> <sup>+2</sup>                                 | 444.7522 <sup>+2</sup> | y <sub>8</sub> <sup>+2</sup>                                  | 645.3105 <sup>+2</sup> | b <sub>12</sub> <sup>+2</sup>                                 | 841.9483 <sup>+2</sup> | MH-H <sub>3</sub> PO <sub>4</sub> <sup>+2</sup>               | 1346.6352 | b <sub>13</sub>                                 |
| 228.0979               | b <sub>3</sub> -H <sub>3</sub> PO <sub>4</sub>               | 447.1919 <sup>+2</sup> | b <sub>8</sub> <sup>+2</sup>                                  | 667.2811               | b <sub>6</sub>                                                | 847.4208 <sup>+2</sup> | y <sub>15</sub> <sup>+2</sup>                                 | 1356.7304 | y <sub>12</sub>                                 |
| 246.6336 <sup>+2</sup> | y <sub>4</sub> <sup>+2</sup>                                 | 447.7376 <sup>+2</sup> | b <sub>9</sub> -H <sub>3</sub> PO <sub>4</sub> <sup>+2</sup>  | 673.8212 <sup>+2</sup> | b <sub>13</sub> <sup>+2</sup>                                 | 888.4971               | y <sub>8</sub>                                                | 1361.7423 | b <sub>14</sub> -H <sub>3</sub> PO <sub>4</sub> |
| 285.1557 <sup>+2</sup> | b <sub>6</sub> -H <sub>3</sub> PO <sub>4</sub> <sup>+2</sup> | 491.2536 <sup>+2</sup> | b <sub>10</sub> -H <sub>3</sub> PO <sub>4</sub> <sup>+2</sup> | 678.8688 <sup>+2</sup> | y <sub>12</sub> <sup>+2</sup>                                 | 890.9368 <sup>+2</sup> | MH <sup>+2</sup>                                              | 1455.7988 | y <sub>13</sub>                                 |
| 295.1600 <sup>+2</sup> | y <sub>5</sub> <sup>+2</sup>                                 | 492.2599               | y <sub>4</sub>                                                | 681.3748 <sup>+2</sup> | b <sub>14</sub> -H <sub>3</sub> PO <sub>4</sub> <sup>+2</sup> | 893.3764               | b <sub>8</sub>                                                | 1459.7192 | b <sub>14</sub>                                 |
| 322.1544               | y <sub>2</sub>                                               | 493.2786 <sup>+2</sup> | y <sub>9</sub> <sup>+2</sup>                                  | 698.3468               | b <sub>7</sub> -H <sub>3</sub> PO <sub>4</sub>                | 894.468                | b <sub>9</sub> -H <sub>3</sub> PO <sub>4</sub>                | 1508.7777 | b <sub>15</sub> -H <sub>3</sub> PO <sub>4</sub> |
| 326.0748               | b <sub>3</sub>                                               | 496.7261 <sup>+2</sup> | b <sub>9</sub> <sup>+2</sup>                                  | 702.3967               | y <sub>6</sub>                                                | 981.5                  | b <sub>10</sub> -H <sub>3</sub> PO <sub>4</sub>               | 1524.8203 | y <sub>14</sub> -H <sub>3</sub> PO <sub>4</sub> |
| 327.1663               | b <sub>4</sub> -H <sub>3</sub> PO <sub>4</sub>               | 539.1861               | b <sub>5</sub>                                                | 728.4030 <sup>+2</sup> | y <sub>13</sub> <sup>+2</sup>                                 | 985.5499               | y <sub>9</sub>                                                | 1595.8574 | y <sub>15</sub> -H <sub>3</sub> PO <sub>4</sub> |
| 334.1442 <sup>+2</sup> | b <sub>6</sub> <sup>+2</sup>                                 | 540.2421 <sup>+2</sup> | b <sub>10</sub> <sup>+2</sup>                                 | 730.3633 <sup>+2</sup> | b <sub>14</sub> <sup>+2</sup>                                 | 992.4449               | b <sub>9</sub>                                                | 1606.7546 | b <sub>15</sub>                                 |
| 349.6770 <sup>+2</sup> | b <sub>7</sub> -H <sub>3</sub> PO <sub>4</sub> <sup>+2</sup> | 547.7957 <sup>+2</sup> | b <sub>11</sub> -H <sub>3</sub> PO <sub>4</sub> <sup>+2</sup> | 754.8925 <sup>+2</sup> | b <sub>15</sub> -H <sub>3</sub> PO <sub>4</sub> <sup>+2</sup> | 1079.4769              | b <sub>10</sub>                                               | 1622.7972 | y <sub>14</sub>                                 |
| 351.7020 <sup>+2</sup> | y <sub>6</sub> <sup>+2</sup>                                 | 557.7999 <sup>+2</sup> | y <sub>10</sub> <sup>+2</sup>                                 | 762.9138 <sup>+2</sup> | y <sub>14</sub> -H <sub>3</sub> PO <sub>4</sub> <sup>+2</sup> | 1094.584               | b <sub>11</sub> -H <sub>3</sub> PO <sub>4</sub>               | 1682.8894 | MH-H <sub>3</sub> PO <sub>4</sub>               |
| 395.2180 <sup>+2</sup> | y <sub>7</sub> <sup>+2</sup>                                 | 569.3042               | b <sub>6</sub> -H <sub>3</sub> PO <sub>4</sub>                | 789.4287               | y <sub>7</sub>                                                | 1114.5925              | y <sub>10</sub>                                               | 1693.8343 | y <sub>15</sub>                                 |
| 398.2034 <sup>+2</sup> | b <sub>8</sub> -H <sub>3</sub> PO <sub>4</sub> <sup>+2</sup> | 589.3126               | y <sub>5</sub>                                                | 795.3995               | b <sub>8</sub> -H <sub>3</sub> PO <sub>4</sub>                | 1191.6368              | b <sub>12</sub> -H <sub>3</sub> PO <sub>4</sub>               | 1780.8663 | MH                                              |

MS/MS Fragmentation of LFSLsNPSLSTTNLSGPSR  
Found in IPI00431698, 68 kDa protein

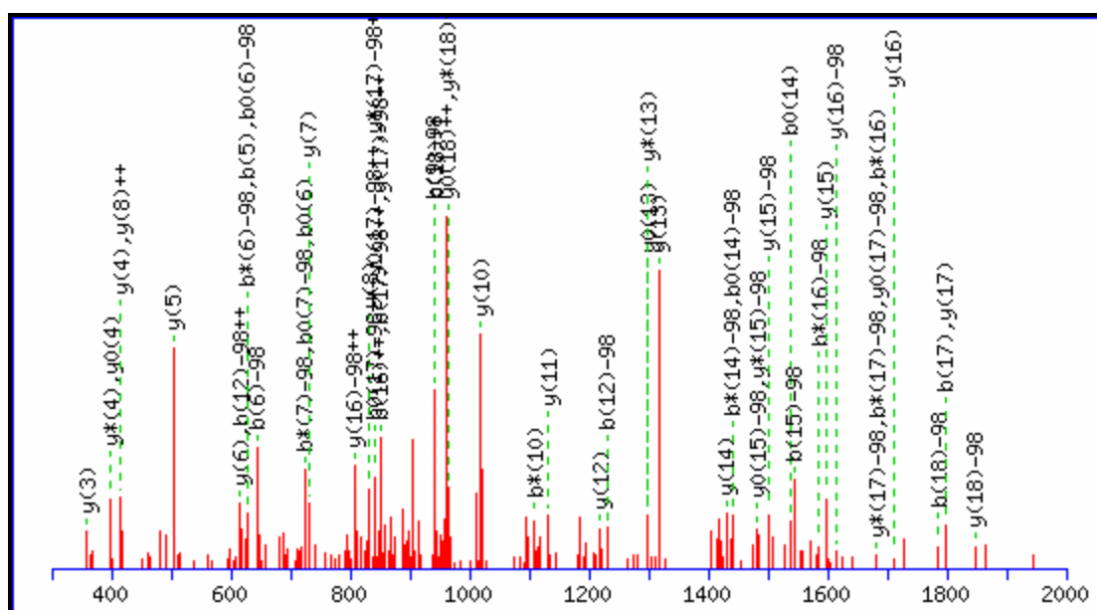

|                        |                              |                        |                                                               |                         |                                                               |           |                                                 |           |                                                 |
|------------------------|------------------------------|------------------------|---------------------------------------------------------------|-------------------------|---------------------------------------------------------------|-----------|-------------------------------------------------|-----------|-------------------------------------------------|
| 88.0631 <sup>+2</sup>  | y <sub>1</sub> <sup>+2</sup> | 503.2572               | y <sub>5</sub>                                                | 828.425                 | b <sub>8</sub> -H <sub>3</sub> PO <sub>4</sub>                | 1126.518  | b <sub>10</sub>                                 | 1601.817  | b <sub>16</sub> -H <sub>3</sub> PO <sub>4</sub> |
| 131.5791 <sup>+2</sup> | y <sub>2</sub> <sup>+2</sup> | 510.2594 <sup>+2</sup> | y <sub>10</sub> <sup>+2</sup>                                 | 831.4319                | y <sub>8</sub>                                                | 1129.5888 | b <sub>11</sub> -H <sub>3</sub> PO <sub>4</sub> | 1612.8289 | y <sub>16</sub> -H <sub>3</sub> PO <sub>4</sub> |
| 175.119                | y <sub>1</sub>               | 530.2973               | b <sub>5</sub> -H <sub>3</sub> PO <sub>4</sub>                | 839.3699                | b <sub>7</sub>                                                | 1132.5957 | y <sub>11</sub>                                 | 1642.7724 | b <sub>15</sub>                                 |
| 180.1055 <sup>+2</sup> | y <sub>3</sub> <sup>+2</sup> | 566.8015 <sup>+2</sup> | y <sub>11</sub> <sup>+2</sup>                                 | 850.4341 <sup>+2</sup>  | y <sub>17</sub> -H <sub>3</sub> PO <sub>4</sub> <sup>+2</sup> | 1219.6277 | y <sub>12</sub>                                 | 1698.8697 | b <sub>17</sub> -H <sub>3</sub> PO <sub>4</sub> |
| 208.6162 <sup>+2</sup> | y <sub>4</sub> <sup>+2</sup> | 610.3175 <sup>+2</sup> | y <sub>12</sub> <sup>+2</sup>                                 | 855.9065 <sup>+2</sup>  | y <sub>16</sub> <sup>+2</sup>                                 | 1227.5657 | b <sub>11</sub>                                 | 1699.7939 | b <sub>16</sub>                                 |
| 252.1323 <sup>+2</sup> | y <sub>5</sub> <sup>+2</sup> | 616.3413               | y <sub>6</sub>                                                | 899.4226 <sup>+2</sup>  | y <sub>17</sub> <sup>+2</sup>                                 | 1230.6365 | b <sub>12</sub> -H <sub>3</sub> PO <sub>4</sub> | 1699.861  | y <sub>17</sub> -H <sub>3</sub> PO <sub>4</sub> |
| 261.1598               | b <sub>2</sub>               | 628.2742               | b <sub>5</sub>                                                | 923.9683 <sup>+2</sup>  | y <sub>18</sub> -H <sub>3</sub> PO <sub>4</sub> <sup>+2</sup> | 1316.6805 | y <sub>13</sub>                                 | 1710.8058 | y <sub>16</sub>                                 |
| 262.151                | y <sub>2</sub>               | 644.3402               | b <sub>6</sub> -H <sub>3</sub> PO <sub>4</sub>                | 926.4019                | b <sub>8</sub>                                                | 1328.6134 | b <sub>12</sub>                                 | 1785.9018 | b <sub>18</sub> -H <sub>3</sub> PO <sub>4</sub> |
| 308.6743 <sup>+2</sup> | y <sub>6</sub> <sup>+2</sup> | 658.8439 <sup>+2</sup> | y <sub>13</sub> <sup>+2</sup>                                 | 932.4796                | y <sub>9</sub>                                                | 1344.6794 | b <sub>13</sub> -H <sub>3</sub> PO <sub>4</sub> | 1796.8466 | b <sub>17</sub>                                 |
| 348.1918               | b <sub>3</sub>               | 715.8653 <sup>+2</sup> | y <sub>14</sub> <sup>+2</sup>                                 | 941.5091                | b <sub>9</sub> -H <sub>3</sub> PO <sub>4</sub>                | 1430.7234 | y <sub>14</sub>                                 | 1797.8378 | y <sub>17</sub>                                 |
| 359.2037               | y <sub>3</sub>               | 730.3842               | y <sub>7</sub>                                                | 972.9568 <sup>+2</sup>  | y <sub>18</sub> <sup>+2</sup>                                 | 1442.6563 | b <sub>13</sub>                                 | 1846.9294 | y <sub>18</sub> -H <sub>3</sub> PO <sub>4</sub> |
| 365.6958 <sup>+2</sup> | y <sub>7</sub> <sup>+2</sup> | 741.393                | b <sub>7</sub> -H <sub>3</sub> PO <sub>4</sub>                | 980.5104 <sup>+2</sup>  | MH-H <sub>3</sub> PO <sub>4</sub> <sup>+2</sup>               | 1457.7635 | b <sub>14</sub> -H <sub>3</sub> PO <sub>4</sub> | 1883.8787 | b <sub>18</sub>                                 |
| 416.2196 <sup>+2</sup> | y <sub>8</sub> <sup>+2</sup> | 742.3171               | b <sub>6</sub>                                                | 1019.5116               | y <sub>10</sub>                                               | 1499.7449 | y <sub>15</sub> -H <sub>3</sub> PO <sub>4</sub> | 1944.9063 | y <sub>18</sub>                                 |
| 416.2252               | y <sub>4</sub>               | 750.3761 <sup>+2</sup> | y <sub>15</sub> -H <sub>3</sub> PO <sub>4</sub> <sup>+2</sup> | 1028.5411               | b <sub>10</sub> -H <sub>3</sub> PO <sub>4</sub>               | 1544.7955 | b <sub>15</sub> -H <sub>3</sub> PO <sub>4</sub> | 1960.0134 | MH-H <sub>3</sub> PO <sub>4</sub>               |
| 461.2758               | b <sub>4</sub>               | 799.3645 <sup>+2</sup> | y <sub>15</sub> <sup>+2</sup>                                 | 1029.4988 <sup>+2</sup> | MH <sup>+2</sup>                                              | 1555.7404 | b <sub>14</sub>                                 | 2057.9903 | MH                                              |
| 466.7434 <sup>+2</sup> | y <sub>9</sub> <sup>+2</sup> | 806.9181 <sup>+2</sup> | y <sub>16</sub> -H <sub>3</sub> PO <sub>4</sub> <sup>+2</sup> | 1039.486                | b <sub>9</sub>                                                | 1597.7218 | y <sub>15</sub>                                 |           |                                                 |

MS/MS Fragmentation of RQPPVsPLTLSPGPEAHQGFSR  
 Found in IPI00431698, 68 kDa protein

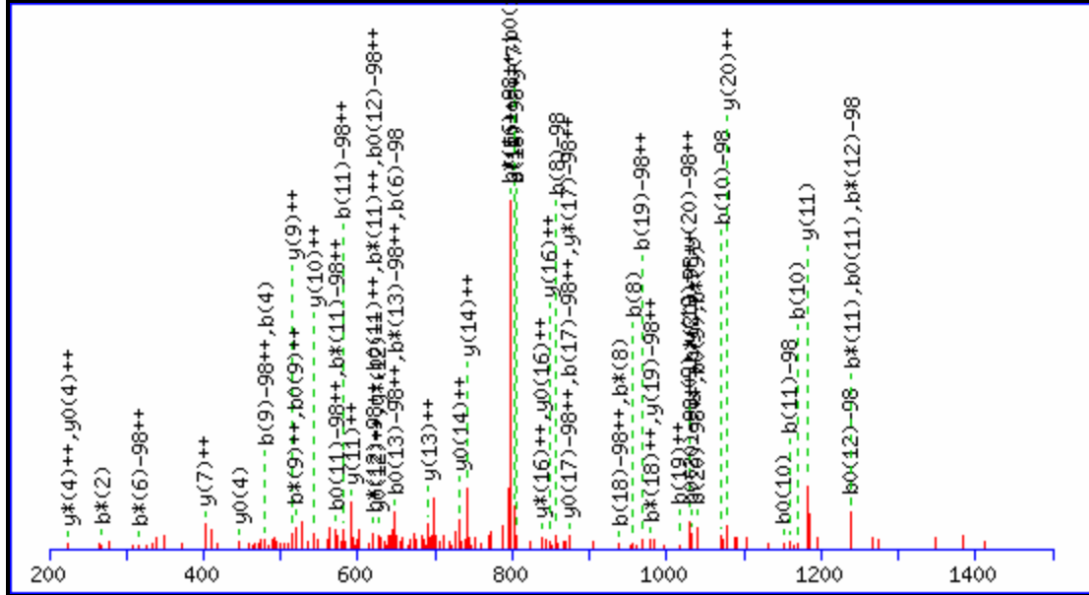

|                        |                                                              |                        |                                                               |                         |                                                               |                         |                                                               |           |                                                 |
|------------------------|--------------------------------------------------------------|------------------------|---------------------------------------------------------------|-------------------------|---------------------------------------------------------------|-------------------------|---------------------------------------------------------------|-----------|-------------------------------------------------|
| 88.0631 <sup>+2</sup>  | y <sub>1</sub> <sup>+2</sup>                                 | 514.7490 <sup>+2</sup> | y <sub>9</sub> <sup>+2</sup>                                  | 805.4385 <sup>+2</sup>  | b <sub>16</sub> -H <sub>3</sub> PO <sub>4</sub> <sup>+2</sup> | 1077.5226 <sup>+2</sup> | y <sub>20</sub> <sup>+2</sup>                                 | 1693.8656 | y <sub>16</sub>                                 |
| 131.5791 <sup>+2</sup> | y <sub>2</sub> <sup>+2</sup>                                 | 528.7655 <sup>+2</sup> | b <sub>9</sub> <sup>+2</sup>                                  | 818.9084 <sup>+2</sup>  | b <sub>15</sub> <sup>+2</sup>                                 | 1083.5582 <sup>+2</sup> | b <sub>21</sub> -H <sub>3</sub> PO <sub>4</sub> <sup>+2</sup> | 1707.8466 | b <sub>16</sub>                                 |
| 143.0871 <sup>+2</sup> | b <sub>2</sub> <sup>+2</sup>                                 | 536.3191 <sup>+2</sup> | b <sub>10</sub> -H <sub>3</sub> PO <sub>4</sub> <sup>+2</sup> | 842.392                 | b <sub>7</sub>                                                | 1085.5123               | y <sub>10</sub>                                               | 1746.9286 | b <sub>17</sub> -H <sub>3</sub> PO <sub>4</sub> |
| 175.119                | y <sub>1</sub>                                               | 543.2598 <sup>+2</sup> | y <sub>10</sub> <sup>+2</sup>                                 | 847.4365 <sup>+2</sup>  | y <sub>16</sub> <sup>+2</sup>                                 | 1089.0306 <sup>+2</sup> | b <sub>20</sub> <sup>+2</sup>                                 | 1762.8871 | y <sub>17</sub> -H <sub>3</sub> PO <sub>4</sub> |
| 191.6135 <sup>+2</sup> | b <sub>3</sub> <sup>+2</sup>                                 | 578.3409               | b <sub>5</sub>                                                | 854.4269 <sup>+2</sup>  | b <sub>16</sub> <sup>+2</sup>                                 | 1092.5635 <sup>+2</sup> | y <sub>21</sub> -H <sub>3</sub> PO <sub>4</sub> <sup>+2</sup> | 1844.9055 | b <sub>17</sub>                                 |
| 205.1133 <sup>+2</sup> | y <sub>3</sub> <sup>+2</sup>                                 | 579.8351 <sup>+2</sup> | b <sub>11</sub> -H <sub>3</sub> PO <sub>4</sub> <sup>+2</sup> | 857.4992                | b <sub>8</sub> -H <sub>3</sub> PO <sub>4</sub>                | 1132.5466 <sup>+2</sup> | b <sub>21</sub> <sup>+2</sup>                                 | 1860.864  | y <sub>17</sub>                                 |
| 233.6241 <sup>+2</sup> | y <sub>4</sub> <sup>+2</sup>                                 | 585.3076 <sup>+2</sup> | b <sub>10</sub> <sup>+2</sup>                                 | 873.9679 <sup>+2</sup>  | b <sub>17</sub> -H <sub>3</sub> PO <sub>4</sub> <sup>+2</sup> | 1141.5519 <sup>+2</sup> | y <sub>21</sub> <sup>+2</sup>                                 | 1861.9555 | y <sub>18</sub> -H <sub>3</sub> PO <sub>4</sub> |
| 240.1399 <sup>+2</sup> | b <sub>4</sub> <sup>+2</sup>                                 | 591.7862 <sup>+2</sup> | y <sub>11</sub> <sup>+2</sup>                                 | 881.9472 <sup>+2</sup>  | y <sub>17</sub> -H <sub>3</sub> PO <sub>4</sub> <sup>+2</sup> | 1158.663                | b <sub>11</sub> -H <sub>3</sub> PO <sub>4</sub>               | 1874.9872 | b <sub>18</sub> -H <sub>3</sub> PO <sub>4</sub> |
| 262.151                | y <sub>2</sub>                                               | 594.2994               | y <sub>5</sub>                                                | 922.9564 <sup>+2</sup>  | b <sub>17</sub> <sup>+2</sup>                                 | 1169.6078               | b <sub>10</sub>                                               | 1932.0086 | b <sub>19</sub> -H <sub>3</sub> PO <sub>4</sub> |
| 285.167                | b <sub>2</sub>                                               | 628.3615 <sup>+2</sup> | b <sub>12</sub> -H <sub>3</sub> PO <sub>4</sub> <sup>+2</sup> | 930.9356 <sup>+2</sup>  | y <sub>17</sub> <sup>+2</sup>                                 | 1170.6140 <sup>+2</sup> | MH-H <sub>3</sub> PO <sub>4</sub> <sup>+2</sup>               | 1959.0083 | y <sub>19</sub> -H <sub>3</sub> PO <sub>4</sub> |
| 289.6741 <sup>+2</sup> | b <sub>5</sub> <sup>+2</sup>                                 | 628.8236 <sup>+2</sup> | b <sub>11</sub> <sup>+2</sup>                                 | 931.4381                | y <sub>8</sub>                                                | 1182.565                | y <sub>11</sub>                                               | 1959.9324 | y <sub>18</sub>                                 |
| 297.6534 <sup>+2</sup> | y <sub>5</sub> <sup>+2</sup>                                 | 635.3022 <sup>+2</sup> | y <sub>12</sub> <sup>+2</sup>                                 | 931.4814 <sup>+2</sup>  | y <sub>18</sub> -H <sub>3</sub> PO <sub>4</sub> <sup>+2</sup> | 1219.6025 <sup>+2</sup> | MH <sup>+2</sup>                                              | 1972.9641 | b <sub>18</sub>                                 |
| 324.1848 <sup>+2</sup> | b <sub>6</sub> -H <sub>3</sub> PO <sub>4</sub> <sup>+2</sup> | 647.3624               | b <sub>6</sub> -H <sub>3</sub> PO <sub>4</sub>                | 937.9972 <sup>+2</sup>  | b <sub>18</sub> -H <sub>3</sub> PO <sub>4</sub> <sup>+2</sup> | 1255.7157               | b <sub>12</sub> -H <sub>3</sub> PO <sub>4</sub>               | 2029.9855 | b <sub>19</sub>                                 |
| 366.1828 <sup>+2</sup> | y <sub>6</sub> <sup>+2</sup>                                 | 656.8722 <sup>+2</sup> | b <sub>13</sub> -H <sub>3</sub> PO <sub>4</sub> <sup>+2</sup> | 955.4761                | b <sub>8</sub>                                                | 1256.6399               | b <sub>11</sub>                                               | 2056.061  | y <sub>20</sub> -H <sub>3</sub> PO <sub>4</sub> |
| 372.7112 <sup>+2</sup> | b <sub>7</sub> -H <sub>3</sub> PO <sub>4</sub> <sup>+2</sup> | 677.3500 <sup>+2</sup> | b <sub>12</sub> <sup>+2</sup>                                 | 958.5469                | b <sub>9</sub> -H <sub>3</sub> PO <sub>4</sub>                | 1269.5971               | y <sub>12</sub>                                               | 2056.9852 | y <sub>19</sub>                                 |
| 373.1733 <sup>+2</sup> | b <sub>6</sub> <sup>+2</sup>                                 | 691.8442 <sup>+2</sup> | y <sub>13</sub> <sup>+2</sup>                                 | 966.5079 <sup>+2</sup>  | b <sub>19</sub> -H <sub>3</sub> PO <sub>4</sub> <sup>+2</sup> | 1312.7372               | b <sub>13</sub> -H <sub>3</sub> PO <sub>4</sub>               | 2079.077  | b <sub>20</sub> -H <sub>3</sub> PO <sub>4</sub> |
| 382.2197               | b <sub>3</sub>                                               | 705.3986 <sup>+2</sup> | b <sub>14</sub> -H <sub>3</sub> PO <sub>4</sub> <sup>+2</sup> | 980.0078 <sup>+2</sup>  | y <sub>19</sub> -H <sub>3</sub> PO <sub>4</sub> <sup>+2</sup> | 1353.6926               | b <sub>12</sub>                                               | 2154.0379 | y <sub>20</sub>                                 |
| 401.7014 <sup>+2</sup> | y <sub>7</sub> <sup>+2</sup>                                 | 705.8607 <sup>+2</sup> | b <sub>13</sub> <sup>+2</sup>                                 | 980.4698 <sup>+2</sup>  | y <sub>18</sub> <sup>+2</sup>                                 | 1382.6811               | y <sub>13</sub>                                               | 2166.1091 | b <sub>21</sub> -H <sub>3</sub> PO <sub>4</sub> |
| 409.2194               | y <sub>3</sub>                                               | 731.3583               | y <sub>6</sub>                                                | 986.9857 <sup>+2</sup>  | b <sub>18</sub> <sup>+2</sup>                                 | 1409.79                 | b <sub>14</sub> -H <sub>3</sub> PO <sub>4</sub>               | 2177.0539 | b <sub>20</sub>                                 |
| 421.6997 <sup>+2</sup> | b <sub>7</sub> <sup>+2</sup>                                 | 742.3680 <sup>+2</sup> | y <sub>14</sub> <sup>+2</sup>                                 | 1015.4964 <sup>+2</sup> | b <sub>19</sub> <sup>+2</sup>                                 | 1410.7141               | b <sub>13</sub>                                               | 2184.1196 | y <sub>21</sub> -H <sub>3</sub> PO <sub>4</sub> |
| 429.2532 <sup>+2</sup> | b <sub>8</sub> -H <sub>3</sub> PO <sub>4</sub> <sup>+2</sup> | 744.4151               | b <sub>7</sub> -H <sub>3</sub> PO <sub>4</sub>                | 1028.4908               | y <sub>9</sub>                                                | 1483.7288               | y <sub>14</sub>                                               | 2264.086  | b <sub>21</sub>                                 |
| 466.2227 <sup>+2</sup> | y <sub>8</sub> <sup>+2</sup>                                 | 745.3393               | b <sub>6</sub>                                                | 1028.5342 <sup>+2</sup> | y <sub>20</sub> -H <sub>3</sub> PO <sub>4</sub> <sup>+2</sup> | 1507.7669               | b <sub>14</sub>                                               | 2282.0965 | y <sub>21</sub>                                 |
| 466.2409               | y <sub>4</sub>                                               | 754.3871 <sup>+2</sup> | b <sub>14</sub> <sup>+2</sup>                                 | 1028.9962 <sup>+2</sup> | y <sub>19</sub> <sup>+2</sup>                                 | 1538.8326               | b <sub>15</sub> -H <sub>3</sub> PO <sub>4</sub>               | 2340.2207 | MH-H <sub>3</sub> PO <sub>4</sub>               |
| 478.2417 <sup>+2</sup> | b <sub>8</sub> <sup>+2</sup>                                 | 769.9199 <sup>+2</sup> | b <sub>15</sub> -H <sub>3</sub> PO <sub>4</sub> <sup>+2</sup> | 1040.0422 <sup>+2</sup> | b <sub>20</sub> -H <sub>3</sub> PO <sub>4</sub> <sup>+2</sup> | 1596.8129               | y <sub>15</sub>                                               | 2438.1976 | MH                                              |
| 479.2725               | b <sub>4</sub>                                               | 798.9101 <sup>+2</sup> | y <sub>15</sub> <sup>+2</sup>                                 | 1056.5238               | b <sub>9</sub>                                                | 1609.8697               | b <sub>16</sub> -H <sub>3</sub> PO <sub>4</sub>               |           |                                                 |
| 479.7771 <sup>+2</sup> | b <sub>9</sub> -H <sub>3</sub> PO <sub>4</sub> <sup>+2</sup> | 802.3955               | y <sub>7</sub>                                                | 1071.6309               | b <sub>10</sub> -H <sub>3</sub> PO <sub>4</sub>               | 1636.8094               | b <sub>15</sub>                                               |           |                                                 |

MS/MS Fragmentation of GLSDHVSLDGQELGTR  
 Found in IPI00028359, Hypothetical protein DKFZp761F0123

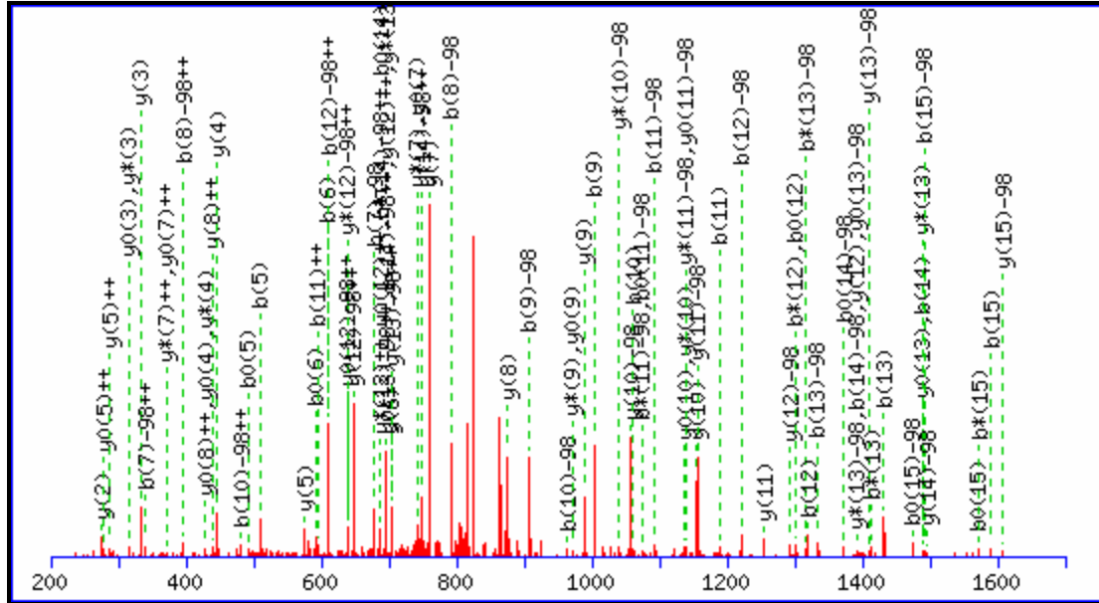

|                        |                                                              |                        |                                                               |                        |                                                               |                        |                                                               |           |                                                 |
|------------------------|--------------------------------------------------------------|------------------------|---------------------------------------------------------------|------------------------|---------------------------------------------------------------|------------------------|---------------------------------------------------------------|-----------|-------------------------------------------------|
| 88.0631 <sup>+2</sup>  | y <sub>1</sub> <sup>+2</sup>                                 | 438.2145 <sup>+2</sup> | y <sub>8</sub> <sup>+2</sup>                                  | 647.3309 <sup>+2</sup> | y <sub>12</sub> -H <sub>3</sub> PO <sub>4</sub> <sup>+2</sup> | 804.9025 <sup>+2</sup> | y <sub>15</sub> -H <sub>3</sub> PO <sub>4</sub> <sup>+2</sup> | 1293.6546 | y <sub>12</sub> -H <sub>3</sub> PO <sub>4</sub> |
| 138.5870 <sup>+2</sup> | y <sub>2</sub> <sup>+2</sup>                                 | 445.1944 <sup>+2</sup> | b <sub>8</sub> <sup>+2</sup>                                  | 659.7692 <sup>+2</sup> | b <sub>12</sub> <sup>+2</sup>                                 | 833.4132 <sup>+2</sup> | MH-H <sub>3</sub> PO <sub>4</sub> <sup>+2</sup>               | 1318.5311 | b <sub>12</sub>                                 |
| 167.0977 <sup>+2</sup> | y <sub>3</sub> <sup>+2</sup>                                 | 446.2722               | y <sub>4</sub>                                                | 667.3228 <sup>+2</sup> | b <sub>13</sub> -H <sub>3</sub> PO <sub>4</sub> <sup>+2</sup> | 853.8909 <sup>+2</sup> | y <sub>15</sub> <sup>+2</sup>                                 | 1333.6383 | b <sub>13</sub> -H <sub>3</sub> PO <sub>4</sub> |
| 171.1128               | b <sub>2</sub>                                               | 453.7194 <sup>+2</sup> | b <sub>9</sub> -H <sub>3</sub> PO <sub>4</sub> <sup>+2</sup>  | 678.3206               | b <sub>7</sub> -H <sub>3</sub> PO <sub>4</sub>                | 875.4217               | y <sub>8</sub>                                                | 1390.6597 | b <sub>14</sub> -H <sub>3</sub> PO <sub>4</sub> |
| 175.119                | y <sub>1</sub>                                               | 482.2302 <sup>+2</sup> | b <sub>10</sub> -H <sub>3</sub> PO <sub>4</sub> <sup>+2</sup> | 695.8335 <sup>+2</sup> | b <sub>14</sub> -H <sub>3</sub> PO <sub>4</sub> <sup>+2</sup> | 882.4016 <sup>+2</sup> | MH <sup>+2</sup>                                              | 1391.6315 | y <sub>12</sub>                                 |
| 223.6397 <sup>+2</sup> | y <sub>4</sub> <sup>+2</sup>                                 | 494.7565 <sup>+2</sup> | y <sub>9</sub> <sup>+2</sup>                                  | 696.3194 <sup>+2</sup> | y <sub>12</sub> <sup>+2</sup>                                 | 889.3815               | b <sub>8</sub>                                                | 1408.6815 | y <sub>13</sub> -H <sub>3</sub> PO <sub>4</sub> |
| 255.6190 <sup>+2</sup> | b <sub>5</sub> <sup>+2</sup>                                 | 502.7079 <sup>+2</sup> | b <sub>9</sub> <sup>+2</sup>                                  | 703.3733               | y <sub>6</sub>                                                | 906.4316               | b <sub>9</sub> -H <sub>3</sub> PO <sub>4</sub>                | 1431.6152 | b <sub>13</sub>                                 |
| 258.1448               | b <sub>3</sub>                                               | 510.2307               | b <sub>5</sub>                                                | 704.8444 <sup>+2</sup> | y <sub>13</sub> -H <sub>3</sub> PO <sub>4</sub> <sup>+2</sup> | 963.453                | b <sub>10</sub> -H <sub>3</sub> PO <sub>4</sub>               | 1488.6366 | b <sub>14</sub>                                 |
| 276.1666               | y <sub>2</sub>                                               | 529.2673 <sup>+2</sup> | y <sub>10</sub> -H <sub>3</sub> PO <sub>4</sub> <sup>+2</sup> | 716.3112 <sup>+2</sup> | b <sub>13</sub> <sup>+2</sup>                                 | 988.5058               | y <sub>9</sub>                                                | 1491.7074 | b <sub>15</sub> -H <sub>3</sub> PO <sub>4</sub> |
| 288.1610 <sup>+2</sup> | y <sub>5</sub> <sup>+2</sup>                                 | 531.2186 <sup>+2</sup> | b <sub>10</sub> <sup>+2</sup>                                 | 744.8220 <sup>+2</sup> | b <sub>14</sub> <sup>+2</sup>                                 | 1004.4085              | b <sub>9</sub>                                                | 1495.7136 | y <sub>14</sub> -H <sub>3</sub> PO <sub>4</sub> |
| 305.1532 <sup>+2</sup> | b <sub>6</sub> <sup>+2</sup>                                 | 546.2594 <sup>+2</sup> | b <sub>11</sub> -H <sub>3</sub> PO <sub>4</sub> <sup>+2</sup> | 746.3573 <sup>+2</sup> | b <sub>15</sub> -H <sub>3</sub> PO <sub>4</sub> <sup>+2</sup> | 1057.5273              | y <sub>10</sub> -H <sub>3</sub> PO <sub>4</sub>               | 1506.6584 | y <sub>13</sub>                                 |
| 333.1881               | y <sub>3</sub>                                               | 575.3148               | y <sub>5</sub>                                                | 748.3604 <sup>+2</sup> | y <sub>14</sub> -H <sub>3</sub> PO <sub>4</sub> <sup>+2</sup> | 1061.4299              | b <sub>10</sub>                                               | 1589.6843 | b <sub>15</sub>                                 |
| 339.6639 <sup>+2</sup> | b <sub>7</sub> -H <sub>3</sub> PO <sub>4</sub> <sup>+2</sup> | 578.2557 <sup>+2</sup> | y <sub>10</sub> <sup>+2</sup>                                 | 753.8329 <sup>+2</sup> | y <sub>13</sub> <sup>+2</sup>                                 | 1091.5116              | b <sub>11</sub> -H <sub>3</sub> PO <sub>4</sub>               | 1593.6905 | y <sub>14</sub>                                 |
| 352.1903 <sup>+2</sup> | y <sub>6</sub> <sup>+2</sup>                                 | 578.8015 <sup>+2</sup> | y <sub>11</sub> -H <sub>3</sub> PO <sub>4</sub> <sup>+2</sup> | 760.3948               | y <sub>7</sub>                                                | 1155.5042              | y <sub>10</sub>                                               | 1608.7976 | y <sub>15</sub> -H <sub>3</sub> PO <sub>4</sub> |
| 373.1718               | b <sub>4</sub>                                               | 595.2479 <sup>+2</sup> | b <sub>11</sub> <sup>+2</sup>                                 | 776.2975               | b <sub>7</sub>                                                | 1156.5957              | y <sub>11</sub> -H <sub>3</sub> PO <sub>4</sub>               | 1665.8191 | MH-H <sub>3</sub> PO <sub>4</sub>               |
| 380.7010 <sup>+2</sup> | y <sub>7</sub> <sup>+2</sup>                                 | 609.2991               | b <sub>6</sub>                                                | 791.4046               | b <sub>8</sub> -H <sub>3</sub> PO <sub>4</sub>                | 1189.4885              | b <sub>11</sub>                                               | 1706.7745 | y <sub>15</sub>                                 |
| 388.6524 <sup>+2</sup> | b <sub>7</sub> <sup>+2</sup>                                 | 610.7807 <sup>+2</sup> | b <sub>12</sub> -H <sub>3</sub> PO <sub>4</sub> <sup>+2</sup> | 795.3458 <sup>+2</sup> | b <sub>15</sub> <sup>+2</sup>                                 | 1220.5542              | b <sub>12</sub> -H <sub>3</sub> PO <sub>4</sub>               | 1763.796  | MH                                              |
| 396.2060 <sup>+2</sup> | b <sub>8</sub> -H <sub>3</sub> PO <sub>4</sub> <sup>+2</sup> | 627.7899 <sup>+2</sup> | y <sub>11</sub> <sup>+2</sup>                                 | 797.3489 <sup>+2</sup> | y <sub>14</sub> <sup>+2</sup>                                 | 1254.5726              | y <sub>11</sub>                                               |           |                                                 |

MS/MS Fragmentation of EtPQGELRPEVVEDEVPRSPVAEEPGGGGSSSSEAK  
 Found in IPI00028359, Hypothetical protein DKFZp761F0123

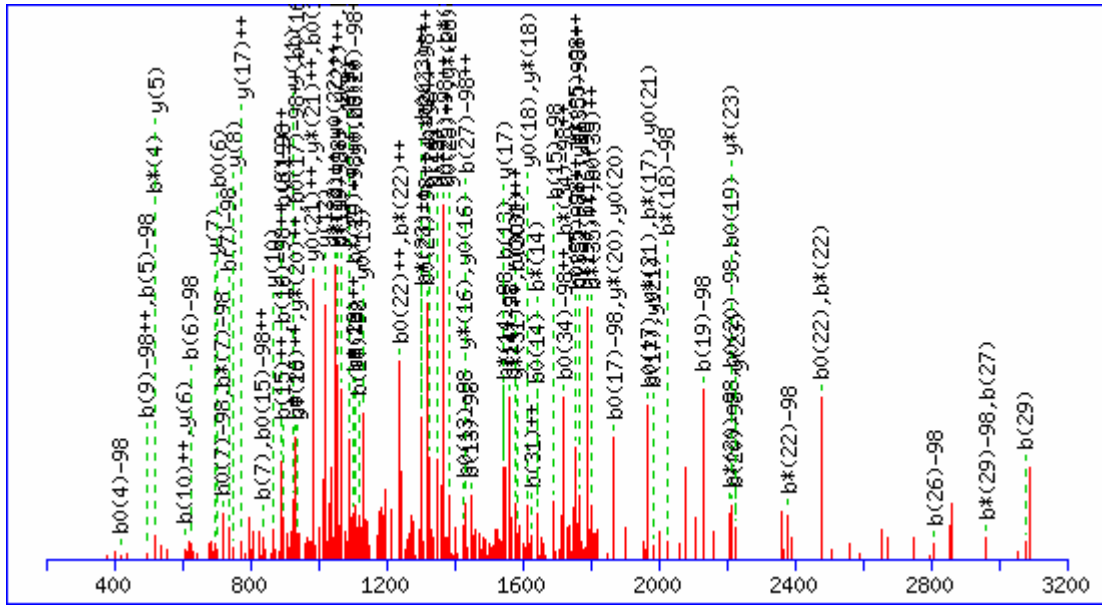

|                        |                                                               |                         |                                                               |                         |                                                               |                         |                                                               |           |                                                 |
|------------------------|---------------------------------------------------------------|-------------------------|---------------------------------------------------------------|-------------------------|---------------------------------------------------------------|-------------------------|---------------------------------------------------------------|-----------|-------------------------------------------------|
| 74.0600 <sup>+2</sup>  | y <sub>1</sub> <sup>+2</sup>                                  | 708.3320 <sup>+2</sup>  | b <sub>12</sub> <sup>+2</sup>                                 | 1179.5382 <sup>+2</sup> | y <sub>24</sub> <sup>+2</sup>                                 | 1619.2789 <sup>+2</sup> | y <sub>32</sub> <sup>+2</sup>                                 | 2495.1814 | b <sub>22</sub>                                 |
| 109.5786 <sup>+2</sup> | y <sub>2</sub> <sup>+2</sup>                                  | 722.2393                | b <sub>6</sub>                                                | 1199.1059 <sup>+2</sup> | b <sub>22</sub> -H <sub>3</sub> PO <sub>4</sub> <sup>+2</sup> | 1621.2658 <sup>+2</sup> | b <sub>32</sub> -H <sub>3</sub> PO <sub>4</sub> <sup>+2</sup> | 2526.2471 | b <sub>23</sub> -H <sub>3</sub> PO <sub>4</sub> |
| 147.1128               | y <sub>1</sub>                                                | 723.8648 <sup>+2</sup>  | b <sub>13</sub> -H <sub>3</sub> PO <sub>4</sub> <sup>+2</sup> | 1212.5758 <sup>+2</sup> | b <sub>21</sub> <sup>+2</sup>                                 | 1626.7383 <sup>+2</sup> | b <sub>31</sub> <sup>+2</sup>                                 | 2556.206  | y <sub>26</sub>                                 |
| 174.0999 <sup>+2</sup> | y <sub>3</sub> <sup>+2</sup>                                  | 724.8286 <sup>+2</sup>  | y <sub>16</sub> <sup>+2</sup>                                 | 1217.5198               | b <sub>10</sub>                                               | 1632.7347               | y <sub>18</sub>                                               | 2624.224  | b <sub>23</sub>                                 |
| 213.087                | b <sub>2</sub> -H <sub>3</sub> PO <sub>4</sub>                | 737.3464                | b <sub>7</sub> -H <sub>3</sub> PO <sub>4</sub>                | 1218.6113               | b <sub>11</sub> -H <sub>3</sub> PO <sub>4</sub>               | 1659.7262               | b <sub>14</sub>                                               | 2655.2897 | b <sub>24</sub> -H <sub>3</sub> PO <sub>4</sub> |
| 217.6159 <sup>+2</sup> | y <sub>4</sub> <sup>+2</sup>                                  | 752.3421                | y <sub>8</sub>                                                | 1229.0724 <sup>+2</sup> | y <sub>25</sub> <sup>+2</sup>                                 | 1664.7818 <sup>+2</sup> | b <sub>33</sub> -H <sub>3</sub> PO <sub>4</sub> <sup>+2</sup> | 2685.2486 | y <sub>27</sub>                                 |
| 218.1499               | y <sub>2</sub>                                                | 772.8533 <sup>+2</sup>  | b <sub>13</sub> <sup>+2</sup>                                 | 1248.0943 <sup>+2</sup> | b <sub>22</sub> <sup>+2</sup>                                 | 1670.2543 <sup>+2</sup> | b <sub>32</sub> <sup>+2</sup>                                 | 2752.3424 | b <sub>25</sub> -H <sub>3</sub> PO <sub>4</sub> |
| 261.1319 <sup>+2</sup> | y <sub>5</sub> <sup>+2</sup>                                  | 773.3550 <sup>+2</sup>  | y <sub>17</sub> <sup>+2</sup>                                 | 1263.6272 <sup>+2</sup> | b <sub>23</sub> -H <sub>3</sub> PO <sub>4</sub> <sup>+2</sup> | 1683.3082 <sup>+2</sup> | y <sub>33</sub> <sup>+2</sup>                                 | 2753.2666 | b <sub>24</sub>                                 |
| 304.6479 <sup>+2</sup> | y <sub>6</sub> <sup>+2</sup>                                  | 781.3783 <sup>+2</sup>  | b <sub>14</sub> -H <sub>3</sub> PO <sub>4</sub> <sup>+2</sup> | 1278.5444               | y <sub>14</sub>                                               | 1690.7919               | b <sub>15</sub> -H <sub>3</sub> PO <sub>4</sub>               | 2782.3014 | y <sub>28</sub>                                 |
| 310.1397               | b <sub>3</sub> -H <sub>3</sub> PO <sub>4</sub>                | 809.3636                | y <sub>9</sub>                                                | 1278.6066 <sup>+2</sup> | y <sub>26</sub> <sup>+2</sup>                                 | 1713.7703 <sup>+2</sup> | b <sub>33</sub> <sup>+2</sup>                                 | 2809.3639 | b <sub>26</sub> -H <sub>3</sub> PO <sub>4</sub> |
| 311.0639               | b <sub>2</sub>                                                | 816.8710 <sup>+2</sup>  | y <sub>18</sub> <sup>+2</sup>                                 | 1312.6156 <sup>+2</sup> | b <sub>23</sub> <sup>+2</sup>                                 | 1729.3031 <sup>+2</sup> | b <sub>34</sub> -H <sub>3</sub> PO <sub>4</sub> <sup>+2</sup> | 2850.3193 | b <sub>25</sub>                                 |
| 347.1925               | y <sub>3</sub>                                                | 830.3667 <sup>+2</sup>  | b <sub>14</sub> <sup>+2</sup>                                 | 1316.5882               | b <sub>11</sub>                                               | 1731.8346 <sup>+2</sup> | y <sub>34</sub> <sup>+2</sup>                                 | 2866.3854 | b <sub>27</sub> -H <sub>3</sub> PO <sub>4</sub> |
| 348.1640 <sup>+2</sup> | y <sub>7</sub> <sup>+2</sup>                                  | 835.3233                | b <sub>7</sub>                                                | 1317.6797               | b <sub>12</sub> -H <sub>3</sub> PO <sub>4</sub>               | 1764.8217 <sup>+2</sup> | b <sub>35</sub> -H <sub>3</sub> PO <sub>4</sub> <sup>+2</sup> | 2907.3408 | b <sub>26</sub>                                 |
| 376.6747 <sup>+2</sup> | y <sub>8</sub> <sup>+2</sup>                                  | 845.8996 <sup>+2</sup>  | b <sub>15</sub> -H <sub>3</sub> PO <sub>4</sub> <sup>+2</sup> | 1328.1485 <sup>+2</sup> | b <sub>24</sub> -H <sub>3</sub> PO <sub>4</sub> <sup>+2</sup> | 1773.3532 <sup>+2</sup> | y <sub>35</sub> -H <sub>3</sub> PO <sub>4</sub> <sup>+2</sup> | 2923.4068 | b <sub>28</sub> -H <sub>3</sub> PO <sub>4</sub> |
| 405.1854 <sup>+2</sup> | y <sub>9</sub> <sup>+2</sup>                                  | 866.385                 | y <sub>10</sub>                                               | 1343.1279 <sup>+2</sup> | y <sub>27</sub> <sup>+2</sup>                                 | 1778.2916 <sup>+2</sup> | b <sub>34</sub> <sup>+2</sup>                                 | 2938.4025 | y <sub>29</sub>                                 |
| 408.1166               | b <sub>3</sub>                                                | 893.4476                | b <sub>8</sub> -H <sub>3</sub> PO <sub>4</sub>                | 1349.5815               | y <sub>15</sub>                                               | 1788.7688               | b <sub>15</sub>                                               | 2964.3623 | b <sub>27</sub>                                 |
| 433.6961 <sup>+2</sup> | y <sub>10</sub> <sup>+2</sup>                                 | 894.8880 <sup>+2</sup>  | b <sub>15</sub> <sup>+2</sup>                                 | 1376.6749 <sup>+2</sup> | b <sub>25</sub> -H <sub>3</sub> PO <sub>4</sub> <sup>+2</sup> | 1788.8359               | y <sub>19</sub>                                               | 2980.4283 | b <sub>29</sub> -H <sub>3</sub> PO <sub>4</sub> |
| 434.2245               | y <sub>4</sub>                                                | 894.9216 <sup>+2</sup>  | y <sub>19</sub> <sup>+2</sup>                                 | 1377.1369 <sup>+2</sup> | b <sub>24</sub> <sup>+2</sup>                                 | 1789.8603               | b <sub>16</sub> -H <sub>3</sub> PO <sub>4</sub>               | 3021.3837 | b <sub>28</sub>                                 |
| 438.1983               | b <sub>4</sub> -H <sub>3</sub> PO <sub>4</sub>                | 895.4338 <sup>+2</sup>  | b <sub>16</sub> -H <sub>3</sub> PO <sub>4</sub> <sup>+2</sup> | 1391.6543 <sup>+2</sup> | y <sub>28</sub> <sup>+2</sup>                                 | 1813.8101 <sup>+2</sup> | b <sub>35</sub> <sup>+2</sup>                                 | 3051.4865 | y <sub>30</sub>                                 |
| 447.2274 <sup>+2</sup> | b <sub>8</sub> -H <sub>3</sub> PO <sub>4</sub> <sup>+2</sup>  | 923.4065                | y <sub>11</sub>                                               | 1405.1856 <sup>+2</sup> | b <sub>26</sub> -H <sub>3</sub> PO <sub>4</sub> <sup>+2</sup> | 1822.3416 <sup>+2</sup> | y <sub>35</sub> <sup>+2</sup>                                 | 3067.4603 | b <sub>30</sub> -H <sub>3</sub> PO <sub>4</sub> |
| 462.2069 <sup>+2</sup> | y <sub>11</sub> <sup>+2</sup>                                 | 943.4480 <sup>+2</sup>  | y <sub>20</sub> <sup>+2</sup>                                 | 1415.6566               | b <sub>12</sub>                                               | 1837.8745 <sup>+2</sup> | MH-H <sub>3</sub> PO <sub>4</sub> <sup>+2</sup>               | 3078.4052 | b <sub>29</sub>                                 |
| 495.2198               | b <sub>5</sub> -H <sub>3</sub> PO <sub>4</sub>                | 943.9602 <sup>+2</sup>  | b <sub>17</sub> -H <sub>3</sub> PO <sub>4</sub> <sup>+2</sup> | 1425.6633 <sup>+2</sup> | b <sub>25</sub> <sup>+2</sup>                                 | 1885.8886               | y <sub>20</sub>                                               | 3154.4923 | b <sub>31</sub> -H <sub>3</sub> PO <sub>4</sub> |
| 495.7538 <sup>+2</sup> | b <sub>9</sub> -H <sub>3</sub> PO <sub>4</sub> <sup>+2</sup>  | 944.4222 <sup>+2</sup>  | b <sub>16</sub> <sup>+2</sup>                                 | 1433.6963 <sup>+2</sup> | b <sub>27</sub> -H <sub>3</sub> PO <sub>4</sub> <sup>+2</sup> | 1886.8629 <sup>+2</sup> | MH <sup>+2</sup>                                              | 3165.4372 | b <sub>30</sub>                                 |
| 496.2159 <sup>+2</sup> | b <sub>8</sub> <sup>+2</sup>                                  | 990.5003                | b <sub>9</sub> -H <sub>3</sub> PO <sub>4</sub>                | 1446.7223               | b <sub>13</sub> -H <sub>3</sub> PO <sub>4</sub>               | 1886.913                | b <sub>17</sub> -H <sub>3</sub> PO <sub>4</sub>               | 3180.5291 | y <sub>31</sub>                                 |
| 510.7333 <sup>+2</sup> | y <sub>12</sub> <sup>+2</sup>                                 | 991.4245                | b <sub>8</sub>                                                | 1448.65                 | y <sub>16</sub>                                               | 1887.8372               | b <sub>16</sub>                                               | 3237.5506 | y <sub>32</sub>                                 |
| 521.2566               | y <sub>5</sub>                                                | 992.9486 <sup>+2</sup>  | b <sub>17</sub> <sup>+2</sup>                                 | 1454.1740 <sup>+2</sup> | b <sub>26</sub> <sup>+2</sup>                                 | 1984.8899               | b <sub>17</sub>                                               | 3241.5244 | b <sub>32</sub> -H <sub>3</sub> PO <sub>4</sub> |
| 536.1752               | b <sub>4</sub>                                                | 992.9822 <sup>+2</sup>  | y <sub>21</sub> <sup>+2</sup>                                 | 1462.2070 <sup>+2</sup> | b <sub>28</sub> -H <sub>3</sub> PO <sub>4</sub> <sup>+2</sup> | 1984.957                | y <sub>21</sub>                                               | 3252.4692 | b <sub>31</sub>                                 |
| 544.7422 <sup>+2</sup> | b <sub>9</sub> <sup>+2</sup>                                  | 1020.4592               | y <sub>12</sub>                                               | 1469.7049 <sup>+2</sup> | y <sub>29</sub> <sup>+2</sup>                                 | 2043.0142               | b <sub>18</sub> -H <sub>3</sub> PO <sub>4</sub>               | 3328.5564 | b <sub>33</sub> -H <sub>3</sub> PO <sub>4</sub> |
| 560.2751 <sup>+2</sup> | b <sub>10</sub> -H <sub>3</sub> PO <sub>4</sub> <sup>+2</sup> | 1022.0107 <sup>+2</sup> | b <sub>18</sub> -H <sub>3</sub> PO <sub>4</sub> <sup>+2</sup> | 1482.6848 <sup>+2</sup> | b <sub>27</sub> <sup>+2</sup>                                 | 2113.9996               | y <sub>22</sub>                                               | 3339.5013 | b <sub>32</sub>                                 |
| 575.2546 <sup>+2</sup> | y <sub>13</sub> <sup>+2</sup>                                 | 1057.5035 <sup>+2</sup> | y <sub>22</sub> <sup>+2</sup>                                 | 1490.7178 <sup>+2</sup> | b <sub>29</sub> -H <sub>3</sub> PO <sub>4</sub> <sup>+2</sup> | 2130.0462               | b <sub>19</sub> -H <sub>3</sub> PO <sub>4</sub>               | 3365.6092 | y <sub>33</sub>                                 |
| 593.1967               | b <sub>5</sub>                                                | 1065.5267 <sup>+2</sup> | b <sub>19</sub> -H <sub>3</sub> PO <sub>4</sub> <sup>+2</sup> | 1511.1955 <sup>+2</sup> | b <sub>28</sub> <sup>+2</sup>                                 | 2140.9911               | b <sub>18</sub>                                               | 3426.5333 | b <sub>33</sub>                                 |
| 608.2886               | y <sub>6</sub>                                                | 1070.9992 <sup>+2</sup> | b <sub>18</sub> <sup>+2</sup>                                 | 1526.2469 <sup>+2</sup> | y <sub>30</sub> <sup>+2</sup>                                 | 2227.099                | b <sub>20</sub> -H <sub>3</sub> PO <sub>4</sub>               | 3457.599  | b <sub>34</sub> -H <sub>3</sub> PO <sub>4</sub> |
| 609.2635 <sup>+2</sup> | b <sub>10</sub> <sup>+2</sup>                                 | 1088.4772               | b <sub>9</sub>                                                | 1534.2338 <sup>+2</sup> | b <sub>30</sub> -H <sub>3</sub> PO <sub>4</sub> <sup>+2</sup> | 2228.0231               | b <sub>19</sub>                                               | 3462.6619 | y <sub>34</sub>                                 |
| 609.8093 <sup>+2</sup> | b <sub>11</sub> -H <sub>3</sub> PO <sub>4</sub> <sup>+2</sup> | 1114.0531 <sup>+2</sup> | b <sub>20</sub> -H <sub>3</sub> PO <sub>4</sub> <sup>+2</sup> | 1539.7062 <sup>+2</sup> | b <sub>29</sub> <sup>+2</sup>                                 | 2229.0266               | y <sub>23</sub>                                               | 3528.6361 | b <sub>35</sub> -H <sub>3</sub> PO <sub>4</sub> |
| 624.2624               | b <sub>6</sub> -H <sub>3</sub> PO <sub>4</sub>                | 1114.5152 <sup>+2</sup> | b <sub>19</sub> <sup>+2</sup>                                 | 1544.6992               | b <sub>13</sub>                                               | 2325.0758               | b <sub>20</sub>                                               | 3545.699  | y <sub>35</sub> -H <sub>3</sub> PO <sub>4</sub> |
| 639.7759 <sup>+2</sup> | y <sub>14</sub> <sup>+2</sup>                                 | 1115.0169 <sup>+2</sup> | y <sub>23</sub> <sup>+2</sup>                                 | 1545.7027               | y <sub>17</sub>                                               | 2326.1674               | b <sub>21</sub> -H <sub>3</sub> PO <sub>4</sub>               | 3555.5759 | b <sub>34</sub>                                 |
| 658.7977 <sup>+2</sup> | b <sub>11</sub> <sup>+2</sup>                                 | 1119.5429               | b <sub>10</sub> -H <sub>3</sub> PO <sub>4</sub>               | 1561.7493               | b <sub>14</sub> -H <sub>3</sub> PO <sub>4</sub>               | 2358.0692               | y <sub>24</sub>                                               | 3626.613  | b <sub>35</sub>                                 |
| 659.3435 <sup>+2</sup> | b <sub>12</sub> -H <sub>3</sub> PO <sub>4</sub> <sup>+2</sup> | 1149.5018               | y <sub>13</sub>                                               | 1577.7498 <sup>+2</sup> | b <sub>31</sub> -H <sub>3</sub> PO <sub>4</sub> <sup>+2</sup> | 2397.2045               | b <sub>22</sub> -H <sub>3</sub> PO <sub>4</sub>               | 3643.6759 | y <sub>35</sub>                                 |
| 675.2944 <sup>+2</sup> | y <sub>15</sub> <sup>+2</sup>                                 | 1163.0416 <sup>+2</sup> | b <sub>20</sub> <sup>+2</sup>                                 | 1583.2222 <sup>+2</sup> | b <sub>30</sub> <sup>+2</sup>                                 | 2424.1443               | b <sub>21</sub>                                               | 3674.7416 | MH-H <sub>3</sub> PO <sub>4</sub>               |
| 695.3206               | y <sub>7</sub>                                                | 1163.5873 <sup>+2</sup> | b <sub>21</sub> -H <sub>3</sub> PO <sub>4</sub> <sup>+2</sup> | 1590.7682 <sup>+2</sup> | y <sub>31</sub> <sup>+2</sup>                                 | 2457.1376               | y <sub>25</sub>                                               | 3772.7185 | MH                                              |



MS/MS Fragmentation of ALVHQLsNESR  
 Found in IPI00169296, Isoform 2b of Oxysterol-binding protein-related protein 3

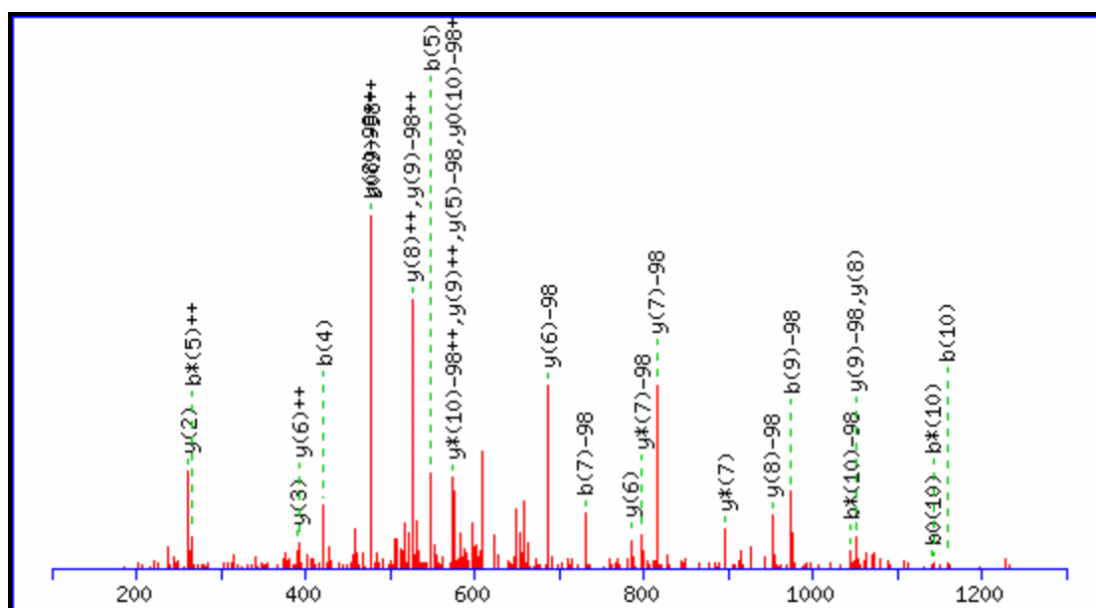

|                        |                                                              |                        |                                                              |                        |                                                               |                        |                                                |           |                                                 |
|------------------------|--------------------------------------------------------------|------------------------|--------------------------------------------------------------|------------------------|---------------------------------------------------------------|------------------------|------------------------------------------------|-----------|-------------------------------------------------|
| 88.0631 <sup>+2</sup>  | y <sub>1</sub> <sup>+2</sup>                                 | 336.6211 <sup>+2</sup> | y <sub>5</sub> <sup>+2</sup>                                 | 487.7563 <sup>+2</sup> | b <sub>9</sub> -H <sub>3</sub> PO <sub>4</sub> <sup>+2</sup>  | 631.7981 <sup>+2</sup> | y <sub>10</sub> <sup>+2</sup>                  | 952.4595  | y <sub>8</sub> -H <sub>3</sub> PO <sub>4</sub>  |
| 131.5791 <sup>+2</sup> | y <sub>2</sub> <sup>+2</sup>                                 | 344.1747 <sup>+2</sup> | y <sub>6</sub> -H <sub>3</sub> PO <sub>4</sub> <sup>+2</sup> | 505.2365               | y <sub>4</sub>                                                | 662.3984               | b <sub>6</sub>                                 | 974.5054  | b <sub>9</sub> -H <sub>3</sub> PO <sub>4</sub>  |
| 175.119                | y <sub>1</sub>                                               | 366.2136 <sup>+2</sup> | b <sub>7</sub> -H <sub>3</sub> PO <sub>4</sub> <sup>+2</sup> | 525.7218 <sup>+2</sup> | y <sub>8</sub> <sup>+2</sup>                                  | 667.3166 <sup>+2</sup> | MH <sup>+2</sup>                               | 1050.4364 | y <sub>8</sub>                                  |
| 185.1285               | b <sub>2</sub>                                               | 391.1936               | y <sub>3</sub>                                               | 526.2676 <sup>+2</sup> | y <sub>9</sub> -H <sub>3</sub> PO <sub>4</sub> <sup>+2</sup>  | 672.2349               | y <sub>5</sub>                                 | 1051.5279 | y <sub>9</sub> -H <sub>3</sub> PO <sub>4</sub>  |
| 196.1004 <sup>+2</sup> | y <sub>3</sub> <sup>+2</sup>                                 | 393.1631 <sup>+2</sup> | y <sub>6</sub> <sup>+2</sup>                                 | 531.2724 <sup>+2</sup> | b <sub>10</sub> -H <sub>3</sub> PO <sub>4</sub> <sup>+2</sup> | 687.342                | y <sub>6</sub> -H <sub>3</sub> PO <sub>4</sub> | 1061.5374 | b <sub>10</sub> -H <sub>3</sub> PO <sub>4</sub> |
| 211.1315 <sup>+2</sup> | b <sub>4</sub> <sup>+2</sup>                                 | 408.2039 <sup>+2</sup> | y <sub>7</sub> -H <sub>3</sub> PO <sub>4</sub> <sup>+2</sup> | 536.7448 <sup>+2</sup> | b <sub>9</sub> <sup>+2</sup>                                  | 731.4199               | b <sub>7</sub> -H <sub>3</sub> PO <sub>4</sub> | 1072.4823 | b <sub>9</sub>                                  |
| 253.1219 <sup>+2</sup> | y <sub>4</sub> <sup>+2</sup>                                 | 415.2020 <sup>+2</sup> | b <sub>7</sub> <sup>+2</sup>                                 | 549.3144               | b <sub>5</sub>                                                | 785.3189               | y <sub>6</sub>                                 | 1149.5048 | y <sub>9</sub>                                  |
| 262.151                | y <sub>2</sub>                                               | 421.2558               | b <sub>4</sub>                                               | 574.258                | y <sub>5</sub> -H <sub>3</sub> PO <sub>4</sub>                | 815.4006               | y <sub>7</sub> -H <sub>3</sub> PO <sub>4</sub> | 1159.5143 | b <sub>10</sub>                                 |
| 275.1608 <sup>+2</sup> | b <sub>5</sub> <sup>+2</sup>                                 | 423.2350 <sup>+2</sup> | b <sub>8</sub> -H <sub>3</sub> PO <sub>4</sub> <sup>+2</sup> | 575.2561 <sup>+2</sup> | y <sub>9</sub> <sup>+2</sup>                                  | 829.3968               | b <sub>7</sub>                                 | 1164.612  | y <sub>10</sub> -H <sub>3</sub> PO <sub>4</sub> |
| 284.1969               | b <sub>3</sub>                                               | 457.1924 <sup>+2</sup> | y <sub>7</sub> <sup>+2</sup>                                 | 580.2608 <sup>+2</sup> | b <sub>10</sub> <sup>+2</sup>                                 | 845.4628               | b <sub>8</sub> -H <sub>3</sub> PO <sub>4</sub> | 1235.6491 | MH-H <sub>3</sub> PO <sub>4</sub>               |
| 287.6326 <sup>+2</sup> | y <sub>5</sub> -H <sub>3</sub> PO <sub>4</sub> <sup>+2</sup> | 472.2235 <sup>+2</sup> | b <sub>8</sub> <sup>+2</sup>                                 | 582.8096 <sup>+2</sup> | y <sub>10</sub> -H <sub>3</sub> PO <sub>4</sub> <sup>+2</sup> | 913.3775               | y <sub>7</sub>                                 | 1262.5889 | y <sub>10</sub>                                 |
| 331.7028 <sup>+2</sup> | b <sub>6</sub> <sup>+2</sup>                                 | 476.7334 <sup>+2</sup> | y <sub>8</sub> -H <sub>3</sub> PO <sub>4</sub> <sup>+2</sup> | 618.3282 <sup>+2</sup> | MH-H <sub>3</sub> PO <sub>4</sub> <sup>+2</sup>               | 943.4397               | b <sub>8</sub>                                 | 1333.626  | MH                                              |

MS/MS Fragmentation of IHAESLLLDsPAVAK  
 Found in IPI00169296, Isoform 2b of Oxysterol-binding protein-related protein 3

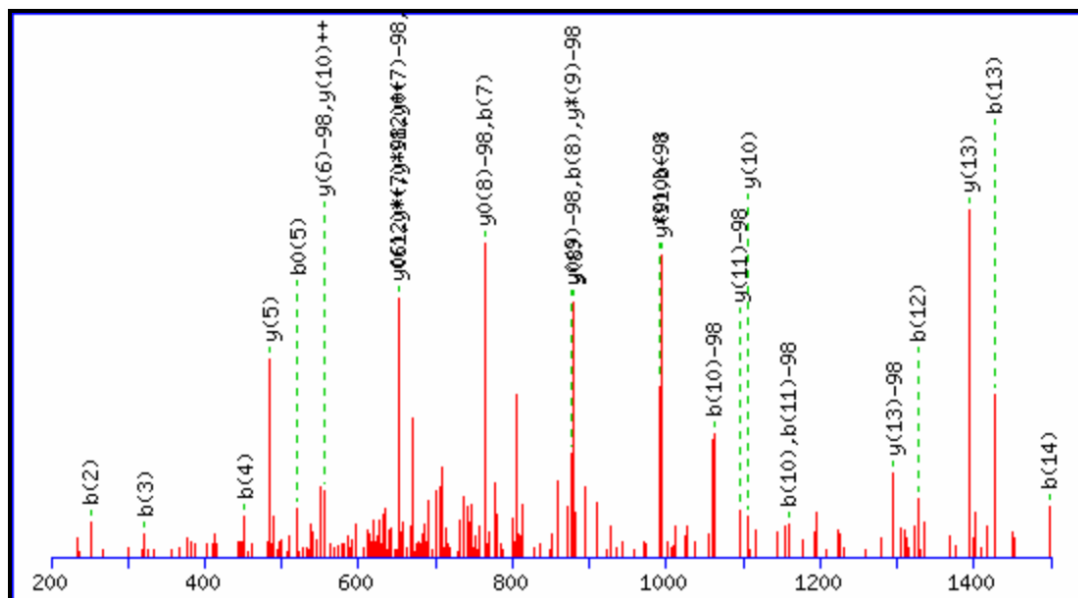

|                        |                                                              |                        |                                                               |                        |                                                               |                        |                                                 |           |                                                 |
|------------------------|--------------------------------------------------------------|------------------------|---------------------------------------------------------------|------------------------|---------------------------------------------------------------|------------------------|-------------------------------------------------|-----------|-------------------------------------------------|
| 74.0600 <sup>+2</sup>  | y <sub>1</sub> <sup>+2</sup>                                 | 382.7187 <sup>+2</sup> | b <sub>7</sub> <sup>+2</sup>                                  | 580.2734 <sup>+2</sup> | b <sub>10</sub> <sup>+2</sup>                                 | 765.8818 <sup>+2</sup> | y <sub>14</sub> <sup>+2</sup>                   | 1229.6525 | b <sub>12</sub> -H <sub>3</sub> PO <sub>4</sub> |
| 109.5786 <sup>+2</sup> | y <sub>2</sub> <sup>+2</sup>                                 | 384.1704 <sup>+2</sup> | y <sub>7</sub> <sup>+2</sup>                                  | 597.3125 <sup>+2</sup> | y <sub>11</sub> <sup>+2</sup>                                 | 767.3335               | y <sub>7</sub>                                  | 1256.5922 | b <sub>11</sub>                                 |
| 126.0788 <sup>+2</sup> | b <sub>2</sub> <sup>+2</sup>                                 | 388.2554               | y <sub>4</sub>                                                | 612.8454 <sup>+2</sup> | y <sub>12</sub> -H <sub>3</sub> PO <sub>4</sub> <sup>+2</sup> | 773.4354 <sup>+2</sup> | MH-H <sub>3</sub> PO <sub>4</sub> <sup>+2</sup> | 1295.7205 | y <sub>13</sub> -H <sub>3</sub> PO <sub>4</sub> |
| 147.1128               | y <sub>1</sub>                                               | 391.7240 <sup>+2</sup> | y <sub>8</sub> -H <sub>3</sub> PO <sub>4</sub> <sup>+2</sup>  | 615.3299 <sup>+2</sup> | b <sub>12</sub> -H <sub>3</sub> PO <sub>4</sub> <sup>+2</sup> | 782.4407               | y <sub>8</sub> -H <sub>3</sub> PO <sub>4</sub>  | 1322.6603 | y <sub>12</sub>                                 |
| 159.1128 <sup>+2</sup> | y <sub>3</sub> <sup>+2</sup>                                 | 439.2607 <sup>+2</sup> | b <sub>8</sub> <sup>+2</sup>                                  | 628.7998 <sup>+2</sup> | b <sub>11</sub> <sup>+2</sup>                                 | 822.4238 <sup>+2</sup> | MH <sup>+2</sup>                                | 1327.6294 | b <sub>12</sub>                                 |
| 161.5973 <sup>+2</sup> | b <sub>3</sub> <sup>+2</sup>                                 | 440.7124 <sup>+2</sup> | y <sub>8</sub> <sup>+2</sup>                                  | 648.3639 <sup>+2</sup> | y <sub>13</sub> -H <sub>3</sub> PO <sub>4</sub> <sup>+2</sup> | 877.5142               | b <sub>8</sub>                                  | 1328.7209 | b <sub>13</sub> -H <sub>3</sub> PO <sub>4</sub> |
| 194.6314 <sup>+2</sup> | y <sub>4</sub> <sup>+2</sup>                                 | 448.2660 <sup>+2</sup> | y <sub>9</sub> -H <sub>3</sub> PO <sub>4</sub> <sup>+2</sup>  | 651.3461               | b <sub>6</sub>                                                | 880.4176               | y <sub>8</sub>                                  | 1393.6974 | y <sub>13</sub>                                 |
| 218.1499               | y <sub>2</sub>                                               | 451.23                 | b <sub>4</sub>                                                | 652.3066               | y <sub>6</sub>                                                | 895.5247               | y <sub>9</sub> -H <sub>3</sub> PO <sub>4</sub>  | 1399.758  | b <sub>14</sub> -H <sub>3</sub> PO <sub>4</sub> |
| 226.1186 <sup>+2</sup> | b <sub>4</sub> <sup>+2</sup>                                 | 485.3082               | y <sub>5</sub>                                                | 661.8338 <sup>+2</sup> | y <sub>12</sub> <sup>+2</sup>                                 | 992.5411               | b <sub>9</sub>                                  | 1426.6978 | b <sub>13</sub>                                 |
| 243.1577 <sup>+2</sup> | y <sub>5</sub> <sup>+2</sup>                                 | 496.7742 <sup>+2</sup> | b <sub>9</sub> <sup>+2</sup>                                  | 664.3183 <sup>+2</sup> | b <sub>12</sub> <sup>+2</sup>                                 | 993.5016               | y <sub>9</sub>                                  | 1432.7795 | y <sub>14</sub> -H <sub>3</sub> PO <sub>4</sub> |
| 251.1503               | b <sub>2</sub>                                               | 497.2545 <sup>+2</sup> | y <sub>9</sub> <sup>+2</sup>                                  | 664.8641 <sup>+2</sup> | b <sub>13</sub> -H <sub>3</sub> PO <sub>4</sub> <sup>+2</sup> | 1008.6088              | y <sub>10</sub> -H <sub>3</sub> PO <sub>4</sub> | 1497.7349 | b <sub>14</sub>                                 |
| 269.6346 <sup>+2</sup> | b <sub>5</sub> <sup>+2</sup>                                 | 504.8080 <sup>+2</sup> | y <sub>10</sub> -H <sub>3</sub> PO <sub>4</sub> <sup>+2</sup> | 669.3566               | y <sub>7</sub> -H <sub>3</sub> PO <sub>4</sub>                | 1061.5626              | b <sub>10</sub> -H <sub>3</sub> PO <sub>4</sub> | 1530.7564 | y <sub>14</sub>                                 |
| 277.6685 <sup>+2</sup> | y <sub>6</sub> -H <sub>3</sub> PO <sub>4</sub> <sup>+2</sup> | 531.2849 <sup>+2</sup> | b <sub>10</sub> -H <sub>3</sub> PO <sub>4</sub> <sup>+2</sup> | 697.3524 <sup>+2</sup> | y <sub>13</sub> <sup>+2</sup>                                 | 1095.6408              | y <sub>11</sub> -H <sub>3</sub> PO <sub>4</sub> | 1545.8635 | MH-H <sub>3</sub> PO <sub>4</sub>               |
| 317.2183               | y <sub>3</sub>                                               | 538.262                | b <sub>5</sub>                                                | 700.3826 <sup>+2</sup> | b <sub>14</sub> -H <sub>3</sub> PO <sub>4</sub> <sup>+2</sup> | 1106.5857              | y <sub>10</sub>                                 | 1643.8404 | MH                                              |
| 322.1874               | b <sub>3</sub>                                               | 548.3241 <sup>+2</sup> | y <sub>11</sub> -H <sub>3</sub> PO <sub>4</sub> <sup>+2</sup> | 713.8525 <sup>+2</sup> | b <sub>13</sub> <sup>+2</sup>                                 | 1158.6154              | b <sub>11</sub> -H <sub>3</sub> PO <sub>4</sub> |           |                                                 |
| 326.1767 <sup>+2</sup> | b <sub>6</sub> <sup>+2</sup>                                 | 553.7965 <sup>+2</sup> | y <sub>10</sub> <sup>+2</sup>                                 | 716.8934 <sup>+2</sup> | y <sub>14</sub> -H <sub>3</sub> PO <sub>4</sub> <sup>+2</sup> | 1159.5395              | b <sub>10</sub>                                 |           |                                                 |
| 326.6569 <sup>+2</sup> | y <sub>6</sub> <sup>+2</sup>                                 | 554.3297               | y <sub>6</sub> -H <sub>3</sub> PO <sub>4</sub>                | 749.3711 <sup>+2</sup> | b <sub>14</sub> <sup>+2</sup>                                 | 1193.6177              | y <sub>11</sub>                                 |           |                                                 |
| 335.1819 <sup>+2</sup> | y <sub>7</sub> -H <sub>3</sub> PO <sub>4</sub> <sup>+2</sup> | 579.8113 <sup>+2</sup> | b <sub>11</sub> -H <sub>3</sub> PO <sub>4</sub> <sup>+2</sup> | 764.4301               | b <sub>7</sub>                                                | 1224.6834              | y <sub>12</sub> -H <sub>3</sub> PO <sub>4</sub> |           |                                                 |

MS/MS Fragmentation of LH(SS)NPNLSTLDFGEEK  
 Found in IPI00169296, Isoform 2b of Oxysterol-binding protein-related protein 3

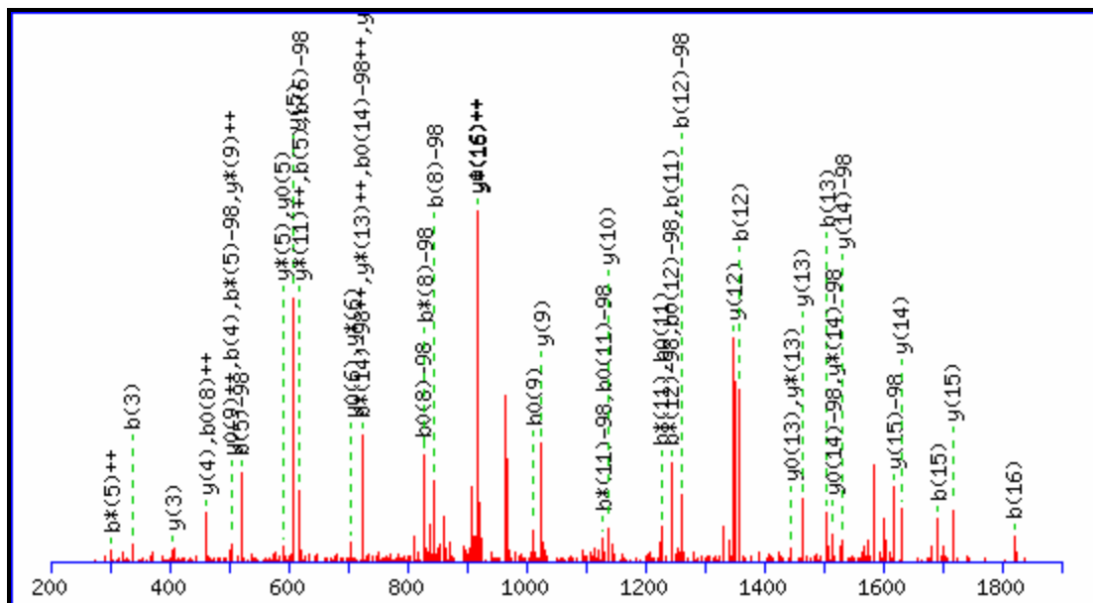

|                        |                                                              |                        |                                                               |                        |                                                               |                        |                                                               |           |                                                 |
|------------------------|--------------------------------------------------------------|------------------------|---------------------------------------------------------------|------------------------|---------------------------------------------------------------|------------------------|---------------------------------------------------------------|-----------|-------------------------------------------------|
| 74.0600 <sup>+2</sup>  | y <sub>1</sub> <sup>+2</sup>                                 | 407.2037               | b <sub>4</sub> -H <sub>3</sub> PO <sub>4</sub>                | 626.8064 <sup>+2</sup> | y <sub>11</sub> <sup>+2</sup>                                 | 859.3695 <sup>+2</sup> | y <sub>15</sub> <sup>+2</sup>                                 | 1359.594  | b <sub>12</sub>                                 |
| 126.0788 <sup>+2</sup> | b <sub>2</sub> <sup>+2</sup>                                 | 415.6633 <sup>+2</sup> | b <sub>7</sub> <sup>+2</sup>                                  | 631.3122 <sup>+2</sup> | b <sub>12</sub> -H <sub>3</sub> PO <sub>4</sub> <sup>+2</sup> | 862.3997 <sup>+2</sup> | b <sub>16</sub> -H <sub>3</sub> PO <sub>4</sub> <sup>+2</sup> | 1408.6856 | b <sub>13</sub> -H <sub>3</sub> PO <sub>4</sub> |
| 138.5813 <sup>+2</sup> | y <sub>2</sub> <sup>+2</sup>                                 | 419.2031 <sup>+2</sup> | y <sub>7</sub> <sup>+2</sup>                                  | 675.3328 <sup>+2</sup> | y <sub>12</sub> <sup>+2</sup>                                 | 878.9105 <sup>+2</sup> | y <sub>16</sub> -H <sub>3</sub> PO <sub>4</sub> <sup>+2</sup> | 1463.7013 | y <sub>13</sub>                                 |
| 147.1128               | y <sub>1</sub>                                               | 423.2169 <sup>+2</sup> | b <sub>8</sub> -H <sub>3</sub> PO <sub>4</sub> <sup>+2</sup>  | 680.3007 <sup>+2</sup> | b <sub>12</sub> <sup>+2</sup>                                 | 911.3882 <sup>+2</sup> | b <sub>16</sub> <sup>+2</sup>                                 | 1465.707  | b <sub>14</sub> -H <sub>3</sub> PO <sub>4</sub> |
| 169.5948 <sup>+2</sup> | b <sub>3</sub> <sup>+2</sup>                                 | 462.2195               | y <sub>4</sub>                                                | 704.8464 <sup>+2</sup> | b <sub>13</sub> -H <sub>3</sub> PO <sub>4</sub> <sup>+2</sup> | 927.8989 <sup>+2</sup> | y <sub>16</sub> <sup>+2</sup>                                 | 1506.6625 | b <sub>13</sub>                                 |
| 203.1026 <sup>+2</sup> | y <sub>3</sub> <sup>+2</sup>                                 | 466.7329 <sup>+2</sup> | b <sub>9</sub> -H <sub>3</sub> PO <sub>4</sub> <sup>+2</sup>  | 716.2763               | b <sub>6</sub>                                                | 932.4585               | b <sub>9</sub> -H <sub>3</sub> PO <sub>4</sub>                | 1532.7227 | y <sub>14</sub> -H <sub>3</sub> PO <sub>4</sub> |
| 204.1055 <sup>+2</sup> | b <sub>1</sub> -H <sub>3</sub> PO <sub>4</sub> <sup>+2</sup> | 469.7269 <sup>+2</sup> | y <sub>8</sub> <sup>+2</sup>                                  | 724.3148               | y <sub>6</sub>                                                | 935.4525 <sup>+2</sup> | MH-H <sub>3</sub> PO <sub>4</sub> <sup>+2</sup>               | 1563.6839 | b <sub>14</sub>                                 |
| 231.6134 <sup>+2</sup> | y <sub>4</sub> <sup>+2</sup>                                 | 472.2053 <sup>+2</sup> | b <sub>8</sub> <sup>+2</sup>                                  | 732.3424               | b <sub>7</sub> -H <sub>3</sub> PO <sub>4</sub>                | 938.4466               | y <sub>8</sub>                                                | 1594.7496 | b <sub>15</sub> -H <sub>3</sub> PO <sub>4</sub> |
| 251.1503               | b <sub>2</sub>                                               | 505.1806               | b <sub>4</sub>                                                | 732.3543 <sup>+2</sup> | y <sub>13</sub> <sup>+2</sup>                                 | 943.4033               | b <sub>8</sub>                                                | 1619.7548 | y <sub>15</sub> -H <sub>3</sub> PO <sub>4</sub> |
| 253.0940 <sup>+2</sup> | b <sub>4</sub> <sup>+2</sup>                                 | 513.2429 <sup>+2</sup> | y <sub>9</sub> <sup>+2</sup>                                  | 733.3571 <sup>+2</sup> | b <sub>14</sub> -H <sub>3</sub> PO <sub>4</sub> <sup>+2</sup> | 984.4410 <sup>+2</sup> | MH <sup>+2</sup>                                              | 1630.6996 | y <sub>14</sub>                                 |
| 261.1270 <sup>+2</sup> | b <sub>5</sub> -H <sub>3</sub> PO <sub>4</sub> <sup>+2</sup> | 515.7213 <sup>+2</sup> | b <sub>9</sub> <sup>+2</sup>                                  | 753.8349 <sup>+2</sup> | b <sub>13</sub> <sup>+2</sup>                                 | 1025.4786              | y <sub>9</sub>                                                | 1692.7265 | b <sub>15</sub>                                 |
| 276.1554               | y <sub>2</sub>                                               | 517.2567 <sup>+2</sup> | b <sub>10</sub> -H <sub>3</sub> PO <sub>4</sub> <sup>+2</sup> | 766.8650 <sup>+2</sup> | y <sub>14</sub> -H <sub>3</sub> PO <sub>4</sub> <sup>+2</sup> | 1030.4354              | b <sub>9</sub>                                                | 1717.7317 | y <sub>15</sub>                                 |
| 305.1476 <sup>+2</sup> | y <sub>5</sub> <sup>+2</sup>                                 | 521.2467               | b <sub>5</sub> -H <sub>3</sub> PO <sub>4</sub>                | 782.3456 <sup>+2</sup> | b <sub>14</sub> <sup>+2</sup>                                 | 1033.5061              | b <sub>10</sub> -H <sub>3</sub> PO <sub>4</sub>               | 1723.7922 | b <sub>16</sub> -H <sub>3</sub> PO <sub>4</sub> |
| 309.6534 <sup>+2</sup> | b <sub>6</sub> -H <sub>3</sub> PO <sub>4</sub> <sup>+2</sup> | 566.2452 <sup>+2</sup> | b <sub>10</sub> <sup>+2</sup>                                 | 797.8784 <sup>+2</sup> | b <sub>15</sub> -H <sub>3</sub> PO <sub>4</sub> <sup>+2</sup> | 1131.483               | b <sub>10</sub>                                               | 1756.8137 | y <sub>16</sub> -H <sub>3</sub> PO <sub>4</sub> |
| 310.1154 <sup>+2</sup> | b <sub>5</sub> <sup>+2</sup>                                 | 569.7850 <sup>+2</sup> | y <sub>10</sub> <sup>+2</sup>                                 | 810.3810 <sup>+2</sup> | y <sub>15</sub> -H <sub>3</sub> PO <sub>4</sub> <sup>+2</sup> | 1138.5626              | y <sub>10</sub>                                               | 1821.7691 | b <sub>16</sub>                                 |
| 338.1823               | b <sub>3</sub>                                               | 573.7987 <sup>+2</sup> | b <sub>11</sub> -H <sub>3</sub> PO <sub>4</sub> <sup>+2</sup> | 815.8534 <sup>+2</sup> | y <sub>14</sub> <sup>+2</sup>                                 | 1146.5902              | b <sub>11</sub> -H <sub>3</sub> PO <sub>4</sub>               | 1854.7906 | y <sub>16</sub>                                 |
| 358.6418 <sup>+2</sup> | b <sub>6</sub> <sup>+2</sup>                                 | 609.2879               | y <sub>5</sub>                                                | 830.3193               | b <sub>7</sub>                                                | 1244.5671              | b <sub>11</sub>                                               | 1869.8977 | MH-H <sub>3</sub> PO <sub>4</sub>               |
| 362.6610 <sup>+2</sup> | y <sub>6</sub> <sup>+2</sup>                                 | 618.2994               | b <sub>6</sub> -H <sub>3</sub> PO <sub>4</sub>                | 837.3989               | y <sub>7</sub>                                                | 1252.6056              | y <sub>11</sub>                                               | 1967.8746 | MH                                              |
| 366.6748 <sup>+2</sup> | b <sub>7</sub> -H <sub>3</sub> PO <sub>4</sub> <sup>+2</sup> | 619.2236               | b <sub>5</sub>                                                | 845.4264               | b <sub>8</sub> -H <sub>3</sub> PO <sub>4</sub>                | 1261.6171              | b <sub>12</sub> -H <sub>3</sub> PO <sub>4</sub>               |           |                                                 |
| 405.198                | y <sub>3</sub>                                               | 622.7872 <sup>+2</sup> | b <sub>11</sub> <sup>+2</sup>                                 | 846.8669 <sup>+2</sup> | b <sub>15</sub> <sup>+2</sup>                                 | 1349.6583              | y <sub>12</sub>                                               |           |                                                 |

MS/MS Fragmentation of QLmEQDASSPSAQVIGLK  
 Found in IPI00169296, Isoform 2b of Oxysterol-binding protein-related protein 3

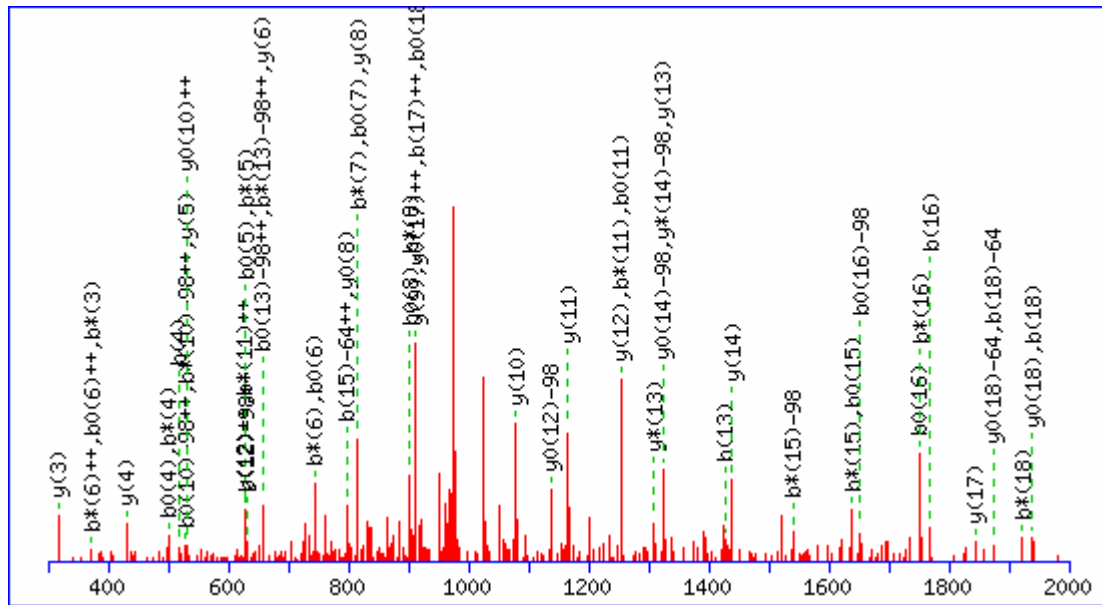

|                        |                                                               |                        |                                                               |                         |                                                               |           |                                                 |           |                                                 |
|------------------------|---------------------------------------------------------------|------------------------|---------------------------------------------------------------|-------------------------|---------------------------------------------------------------|-----------|-------------------------------------------------|-----------|-------------------------------------------------|
| 74.0600 <sup>+2</sup>  | y <sub>1</sub> <sup>+2</sup>                                  | 529.3708               | y <sub>5</sub>                                                | 815.4985                | y <sub>8</sub>                                                | 1166.5817 | y <sub>11</sub>                                 | 1567.7363 | y <sub>15</sub>                                 |
| 130.6021 <sup>+2</sup> | y <sub>2</sub> <sup>+2</sup>                                  | 534.8060 <sup>+2</sup> | y <sub>11</sub> -H <sub>3</sub> PO <sub>4</sub> <sup>+2</sup> | 832.3505                | b <sub>7</sub>                                                | 1172.4888 | b <sub>11</sub> -H <sub>3</sub> PO <sub>4</sub> | 1598.802  | y <sub>16</sub> -H <sub>3</sub> PO <sub>4</sub> |
| 147.1128               | y <sub>1</sub>                                                | 540.2785 <sup>+2</sup> | y <sub>10</sub> <sup>+2</sup>                                 | 848.8931 <sup>+2</sup>  | y <sub>16</sub> <sup>+2</sup>                                 | 1173.413  | b <sub>10</sub>                                 | 1655.6619 | b <sub>15</sub>                                 |
| 159.1128 <sup>+2</sup> | y <sub>3</sub> <sup>+2</sup>                                  | 578.3220 <sup>+2</sup> | y <sub>12</sub> -H <sub>3</sub> PO <sub>4</sub> <sup>+2</sup> | 873.4224 <sup>+2</sup>  | y <sub>17</sub> -H <sub>3</sub> PO <sub>4</sub> <sup>+2</sup> | 1226.6739 | y <sub>13</sub> -H <sub>3</sub> PO <sub>4</sub> | 1670.769  | b <sub>16</sub> -H <sub>3</sub> PO <sub>4</sub> |
| 215.6548 <sup>+2</sup> | y <sub>4</sub> <sup>+2</sup>                                  | 583.7945 <sup>+2</sup> | y <sub>11</sub> <sup>+2</sup>                                 | 912.5513                | y <sub>9</sub>                                                | 1253.6137 | y <sub>12</sub>                                 | 1696.7789 | y <sub>16</sub>                                 |
| 242.1499               | b <sub>2</sub>                                                | 613.8406 <sup>+2</sup> | y <sub>13</sub> -H <sub>3</sub> PO <sub>4</sub> <sup>+2</sup> | 919.3826                | b <sub>8</sub>                                                | 1259.5209 | b <sub>12</sub> -H <sub>3</sub> PO <sub>4</sub> | 1727.7905 | b <sub>17</sub> -H <sub>3</sub> PO <sub>4</sub> |
| 260.1969               | y <sub>2</sub>                                                | 627.3105 <sup>+2</sup> | y <sub>12</sub> <sup>+2</sup>                                 | 922.4108 <sup>+2</sup>  | y <sub>17</sub> <sup>+2</sup>                                 | 1270.4657 | b <sub>11</sub>                                 | 1745.8374 | y <sub>17</sub> -H <sub>3</sub> PO <sub>4</sub> |
| 265.1890 <sup>+2</sup> | y <sub>5</sub> <sup>+2</sup>                                  | 646.2865               | b <sub>5</sub>                                                | 929.9644 <sup>+2</sup>  | y <sub>18</sub> -H <sub>3</sub> PO <sub>4</sub> <sup>+2</sup> | 1324.6508 | y <sub>13</sub>                                 | 1768.7459 | b <sub>16</sub>                                 |
| 317.2183               | y <sub>3</sub>                                                | 657.4294               | y <sub>6</sub>                                                | 978.9528 <sup>+2</sup>  | y <sub>18</sub> <sup>+2</sup>                                 | 1330.558  | b <sub>13</sub> -H <sub>3</sub> PO <sub>4</sub> | 1825.7674 | b <sub>17</sub>                                 |
| 329.2183 <sup>+2</sup> | y <sub>6</sub> <sup>+2</sup>                                  | 662.8290 <sup>+2</sup> | y <sub>13</sub> <sup>+2</sup>                                 | 981.5728                | y <sub>10</sub> -H <sub>3</sub> PO <sub>4</sub>               | 1341.7009 | y <sub>14</sub> -H <sub>3</sub> PO <sub>4</sub> | 1840.8746 | b <sub>18</sub> -H <sub>3</sub> PO <sub>4</sub> |
| 364.7369 <sup>+2</sup> | y <sub>7</sub> <sup>+2</sup>                                  | 671.3541 <sup>+2</sup> | y <sub>14</sub> -H <sub>3</sub> PO <sub>4</sub> <sup>+2</sup> | 993.9937 <sup>+2</sup>  | MH-H <sub>3</sub> PO <sub>4</sub> <sup>+2</sup>               | 1357.4978 | b <sub>12</sub>                                 | 1843.8143 | y <sub>17</sub>                                 |
| 389.1853               | b <sub>3</sub>                                                | 720.3425 <sup>+2</sup> | y <sub>14</sub> <sup>+2</sup>                                 | 1006.4146               | b <sub>9</sub>                                                | 1428.5349 | b <sub>13</sub>                                 | 1858.9215 | y <sub>18</sub> -H <sub>3</sub> PO <sub>4</sub> |
| 408.2529 <sup>+2</sup> | y <sub>8</sub> <sup>+2</sup>                                  | 728.4665               | y <sub>7</sub>                                                | 1042.9821 <sup>+2</sup> | MH <sup>+2</sup>                                              | 1439.6778 | y <sub>14</sub>                                 | 1938.8514 | b <sub>18</sub>                                 |
| 430.3024               | y <sub>4</sub>                                                | 735.3834 <sup>+2</sup> | y <sub>15</sub> -H <sub>3</sub> PO <sub>4</sub> <sup>+2</sup> | 1068.6048               | y <sub>11</sub> -H <sub>3</sub> PO <sub>4</sub>               | 1458.6165 | b <sub>14</sub> -H <sub>3</sub> PO <sub>4</sub> | 1956.8984 | y <sub>18</sub>                                 |
| 456.7793 <sup>+2</sup> | y <sub>9</sub> <sup>+2</sup>                                  | 761.3134               | b <sub>6</sub>                                                | 1075.4361               | b <sub>10</sub> -H <sub>3</sub> PO <sub>4</sub>               | 1469.7594 | y <sub>15</sub> -H <sub>3</sub> PO <sub>4</sub> | 1986.9801 | MH-H <sub>3</sub> PO <sub>4</sub>               |
| 491.2900 <sup>+2</sup> | y <sub>10</sub> -H <sub>3</sub> PO <sub>4</sub> <sup>+2</sup> | 784.3718 <sup>+2</sup> | y <sub>15</sub> <sup>+2</sup>                                 | 1079.5497               | y <sub>10</sub>                                               | 1556.5934 | b <sub>14</sub>                                 | 2084.957  | MH                                              |
| 518.2279               | b <sub>4</sub>                                                | 799.9047 <sup>+2</sup> | y <sub>16</sub> -H <sub>3</sub> PO <sub>4</sub> <sup>+2</sup> | 1155.6368               | y <sub>12</sub> -H <sub>3</sub> PO <sub>4</sub>               | 1557.685  | b <sub>15</sub> -H <sub>3</sub> PO <sub>4</sub> |           |                                                 |

MS/MS Fragmentation of STsQGSINSPVYSR  
 Found in IPI00515115, Actin binding LIM protein 1

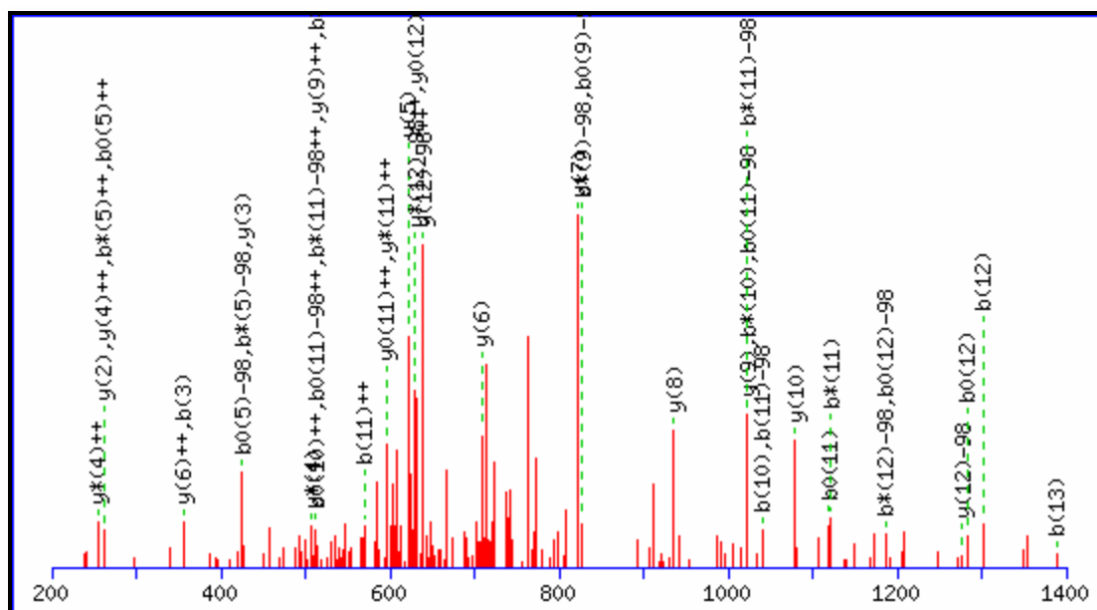

|                        |                                                |                        |                                                |                        |                                                               |           |                                                 |           |                                                 |
|------------------------|------------------------------------------------|------------------------|------------------------------------------------|------------------------|---------------------------------------------------------------|-----------|-------------------------------------------------|-----------|-------------------------------------------------|
| 88.0631 <sup>+2</sup>  | y <sub>1</sub> <sup>+2</sup>                   | 411.7089 <sup>+2</sup> | y <sub>7</sub> <sup>+2</sup>                   | 628.1974               | b <sub>6</sub>                                                | 844.3795  | b <sub>9</sub> -H <sub>3</sub> PO <sub>4</sub>  | 1276.628  | y <sub>12</sub> -H <sub>3</sub> PO <sub>4</sub> |
| 131.5791 <sup>+2</sup> | y <sub>2</sub> <sup>+2</sup>                   | 425.2143               | y <sub>3</sub>                                 | 638.8177 <sup>+2</sup> | y <sub>12</sub> -H <sub>3</sub> PO <sub>4</sub> <sup>+2</sup> | 855.3244  | b <sub>8</sub>                                  | 1290.5961 | b <sub>13</sub> -H <sub>3</sub> PO <sub>4</sub> |
| 175.119                | y <sub>1</sub>                                 | 443.1885               | b <sub>2</sub> -H <sub>3</sub> PO <sub>4</sub> | 643.3046               | b <sub>7</sub> -H <sub>3</sub> PO <sub>4</sub>                | 935.4945  | y <sub>8</sub>                                  | 1301.5409 | b <sub>12</sub>                                 |
| 189.087                | b <sub>2</sub>                                 | 468.2509 <sup>+2</sup> | y <sub>8</sub> <sup>+2</sup>                   | 687.8061 <sup>+2</sup> | y <sub>12</sub> <sup>+2</sup>                                 | 941.4323  | b <sub>10</sub> -H <sub>3</sub> PO <sub>4</sub> | 1374.6049 | y <sub>12</sub>                                 |
| 213.1108 <sup>+2</sup> | y <sub>3</sub> <sup>+2</sup>                   | 484.1439               | b <sub>4</sub>                                 | 689.3415 <sup>+2</sup> | y <sub>13</sub> -H <sub>3</sub> PO <sub>4</sub> <sup>+2</sup> | 942.3564  | b <sub>9</sub>                                  | 1377.6757 | y <sub>13</sub> -H <sub>3</sub> PO <sub>4</sub> |
| 258.1084               | b <sub>3</sub> -H <sub>3</sub> PO <sub>4</sub> | 511.7669 <sup>+2</sup> | y <sub>9</sub> <sup>+2</sup>                   | 708.3675               | y <sub>6</sub>                                                | 1022.5265 | y <sub>9</sub>                                  | 1388.573  | b <sub>13</sub>                                 |
| 262.151                | y <sub>2</sub>                                 | 524.2827               | y <sub>4</sub>                                 | 732.8575 <sup>+2</sup> | MH-H <sub>3</sub> PO <sub>4</sub> <sup>+2</sup>               | 1039.4092 | b <sub>10</sub>                                 | 1464.7077 | MH-H <sub>3</sub> PO <sub>4</sub>               |
| 262.6450 <sup>+2</sup> | y <sub>4</sub> <sup>+2</sup>                   | 530.2205               | b <sub>6</sub> -H <sub>3</sub> PO <sub>4</sub> | 738.3299 <sup>+2</sup> | y <sub>13</sub> <sup>+2</sup>                                 | 1040.5007 | b <sub>11</sub> -H <sub>3</sub> PO <sub>4</sub> | 1475.6526 | y <sub>13</sub>                                 |
| 311.1714 <sup>+2</sup> | y <sub>5</sub> <sup>+2</sup>                   | 540.2776 <sup>+2</sup> | y <sub>10</sub> <sup>+2</sup>                  | 741.2815               | b <sub>7</sub>                                                | 1079.548  | y <sub>10</sub>                                 | 1562.6846 | MH                                              |
| 354.6874 <sup>+2</sup> | y <sub>6</sub> <sup>+2</sup>                   | 541.1654               | b <sub>5</sub>                                 | 757.3475               | b <sub>8</sub> -H <sub>3</sub> PO <sub>4</sub>                | 1138.4776 | b <sub>11</sub>                                 |           |                                                 |
| 356.0853               | b <sub>3</sub>                                 | 604.3069 <sup>+2</sup> | y <sub>11</sub> <sup>+2</sup>                  | 781.8460 <sup>+2</sup> | MH <sup>+2</sup>                                              | 1203.564  | b <sub>12</sub> -H <sub>3</sub> PO <sub>4</sub> |           |                                                 |
| 386.167                | b <sub>4</sub> -H <sub>3</sub> PO <sub>4</sub> | 621.3355               | y <sub>5</sub>                                 | 822.4104               | y <sub>7</sub>                                                | 1207.6066 | y <sub>11</sub>                                 |           |                                                 |

MS/MS Fragmentation of (T)L(S)PTPSAEGYQDVR  
 Found in IPI00515115, Actin binding LIM protein 1

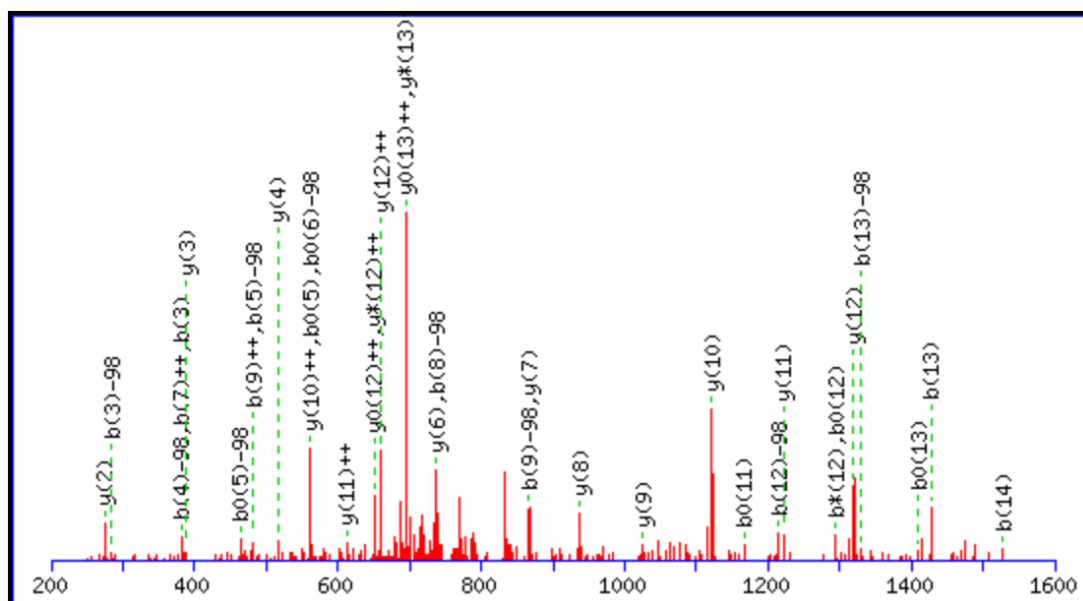

|                        |                                                |                        |                                                |                        |                                                 |           |                                                 |           |                                                 |
|------------------------|------------------------------------------------|------------------------|------------------------------------------------|------------------------|-------------------------------------------------|-----------|-------------------------------------------------|-----------|-------------------------------------------------|
| 88.0631 <sup>+2</sup>  | y <sub>1</sub> <sup>+2</sup>                   | 382.1374               | b <sub>3</sub>                                 | 660.3149 <sup>+2</sup> | y <sub>12</sub> <sup>+2</sup>                   | 866.4003  | y <sub>7</sub>                                  | 1312.5457 | b <sub>12</sub>                                 |
| 137.5973 <sup>+2</sup> | y <sub>2</sub> <sup>+2</sup>                   | 389.2143               | y <sub>3</sub>                                 | 666.3457               | b <sub>7</sub> -H <sub>3</sub> PO <sub>4</sub>  | 866.4254  | b <sub>9</sub> -H <sub>3</sub> PO <sub>4</sub>  | 1319.6226 | y <sub>12</sub>                                 |
| 175.119                | y <sub>1</sub>                                 | 433.7038 <sup>+2</sup> | y <sub>7</sub> <sup>+2</sup>                   | 677.2906               | b <sub>6</sub>                                  | 923.4469  | b <sub>10</sub> -H <sub>3</sub> PO <sub>4</sub> | 1329.5957 | b <sub>13</sub> -H <sub>3</sub> PO <sub>4</sub> |
| 195.1108 <sup>+2</sup> | y <sub>3</sub> <sup>+2</sup>                   | 469.2223 <sup>+2</sup> | y <sub>8</sub> <sup>+2</sup>                   | 680.3362               | y <sub>5</sub>                                  | 937.4374  | y <sub>8</sub>                                  | 1406.6546 | y <sub>13</sub>                                 |
| 197.1285               | b <sub>2</sub> -H <sub>3</sub> PO <sub>4</sub> | 479.1901               | b <sub>4</sub>                                 | 703.8310 <sup>+2</sup> | y <sub>13</sub> <sup>+2</sup>                   | 964.4023  | b <sub>9</sub>                                  | 1427.5726 | b <sub>13</sub>                                 |
| 259.1401 <sup>+2</sup> | y <sub>4</sub> <sup>+2</sup>                   | 482.2609               | b <sub>5</sub> -H <sub>3</sub> PO <sub>4</sub> | 737.3577               | y <sub>6</sub>                                  | 1021.4238 | b <sub>10</sub>                                 | 1428.6642 | b <sub>14</sub> -H <sub>3</sub> PO <sub>4</sub> |
| 274.1874               | y <sub>2</sub>                                 | 512.7383 <sup>+2</sup> | y <sub>9</sub> <sup>+2</sup>                   | 737.3828               | b <sub>8</sub> -H <sub>3</sub> PO <sub>4</sub>  | 1024.4694 | y <sub>9</sub>                                  | 1519.7387 | y <sub>14</sub>                                 |
| 284.1605               | b <sub>3</sub> -H <sub>3</sub> PO <sub>4</sub> | 517.2729               | y <sub>4</sub>                                 | 760.3730 <sup>+2</sup> | y <sub>14</sub> <sup>+2</sup>                   | 1086.5102 | b <sub>11</sub> -H <sub>3</sub> PO <sub>4</sub> | 1526.641  | b <sub>14</sub>                                 |
| 295.1053               | b <sub>2</sub>                                 | 561.2647 <sup>+2</sup> | y <sub>10</sub> <sup>+2</sup>                  | 801.8916 <sup>+2</sup> | b <sub>7</sub>                                  | 1121.5222 | y <sub>10</sub>                                 | 1602.7758 | MH-H <sub>3</sub> PO <sub>4</sub>               |
| 340.6717 <sup>+2</sup> | y <sub>5</sub> <sup>+2</sup>                   | 579.3137               | b <sub>6</sub> -H <sub>3</sub> PO <sub>4</sub> | 801.8916 <sup>+2</sup> | MH-H <sub>3</sub> PO <sub>4</sub> <sup>+2</sup> | 1184.4871 | b <sub>11</sub>                                 | 1700.7527 | MH                                              |
| 369.1825 <sup>+2</sup> | y <sub>6</sub> <sup>+2</sup>                   | 580.2378               | b <sub>5</sub>                                 | 835.3597               | b <sub>8</sub>                                  | 1214.5688 | b <sub>12</sub> -H <sub>3</sub> PO <sub>4</sub> |           |                                                 |
| 381.2132               | b <sub>4</sub> -H <sub>3</sub> PO <sub>4</sub> | 611.7886 <sup>+2</sup> | y <sub>11</sub> <sup>+2</sup>                  | 850.8800 <sup>+2</sup> | MH <sup>+2</sup>                                | 1222.5699 | y <sub>11</sub>                                 |           |                                                 |

MS/MS Fragmentation of R(SS)GREEDDEELLR  
 Found in IPI00515115, Actin binding LIM protein 1

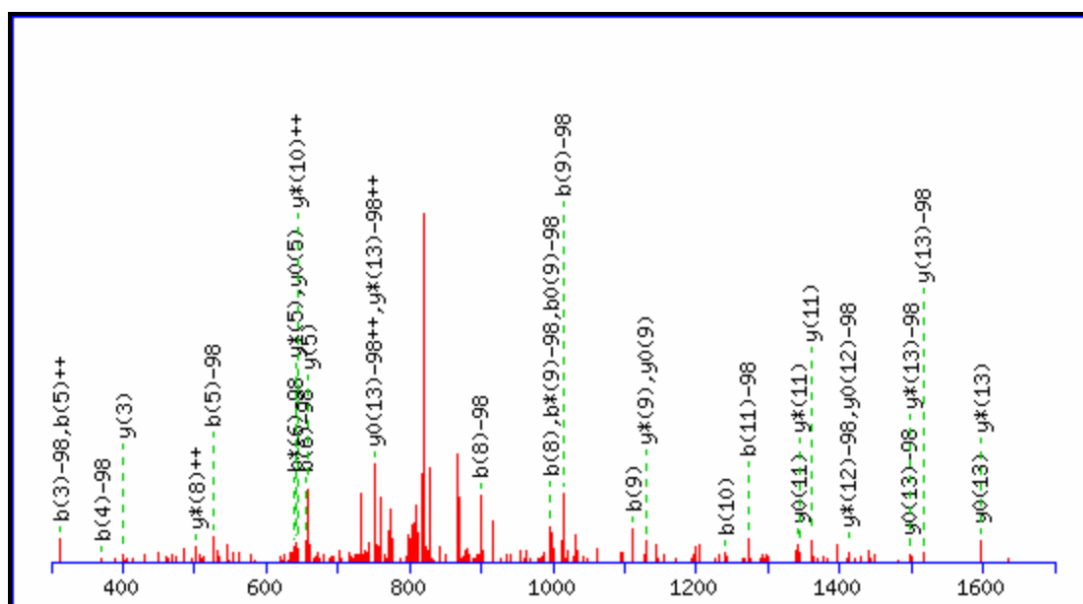

|                        |                                                              |                        |                                                              |                        |                                                               |                        |                                                               |           |                                                 |
|------------------------|--------------------------------------------------------------|------------------------|--------------------------------------------------------------|------------------------|---------------------------------------------------------------|------------------------|---------------------------------------------------------------|-----------|-------------------------------------------------|
| 88.0631 <sup>+2</sup>  | y <sub>1</sub> <sup>+2</sup>                                 | 330.1898 <sup>+2</sup> | y <sub>5</sub> <sup>+2</sup>                                 | 556.7038 <sup>+2</sup> | b <sub>9</sub> <sup>+2</sup>                                  | 758.8473 <sup>+2</sup> | y <sub>13</sub> -H <sub>3</sub> PO <sub>4</sub> <sup>+2</sup> | 1147.5113 | y <sub>9</sub>                                  |
| 122.5738 <sup>+2</sup> | b <sub>2</sub> <sup>+2</sup>                                 | 370.1833               | b <sub>4</sub> -H <sub>3</sub> PO <sub>4</sub>               | 572.2367 <sup>+2</sup> | b <sub>10</sub> -H <sub>3</sub> PO <sub>4</sub> <sup>+2</sup> | 764.3198 <sup>+2</sup> | y <sub>12</sub> <sup>+2</sup>                                 | 1241.443  | b <sub>10</sub>                                 |
| 144.6051 <sup>+2</sup> | y <sub>2</sub> <sup>+2</sup>                                 | 377.1556 <sup>+2</sup> | b <sub>6</sub> <sup>+2</sup>                                 | 574.2593 <sup>+2</sup> | y <sub>9</sub> <sup>+2</sup>                                  | 774.3992               | y <sub>6</sub>                                                | 1272.5087 | b <sub>11</sub> -H <sub>3</sub> PO <sub>4</sub> |
| 157.0846 <sup>+2</sup> | b <sub>3</sub> -H <sub>3</sub> PO <sub>4</sub> <sup>+2</sup> | 387.7032 <sup>+2</sup> | y <sub>6</sub> <sup>+2</sup>                                 | 621.2251 <sup>+2</sup> | b <sub>10</sub> <sup>+2</sup>                                 | 784.3696               | b <sub>7</sub> -H <sub>3</sub> PO <sub>4</sub>                | 1303.6124 | y <sub>10</sub>                                 |
| 175.119                | y <sub>1</sub>                                               | 392.6885 <sup>+2</sup> | b <sub>7</sub> -H <sub>3</sub> PO <sub>4</sub> <sup>+2</sup> | 624.2613               | b <sub>5</sub>                                                | 798.8305 <sup>+2</sup> | b <sub>13</sub> <sup>+2</sup>                                 | 1360.6339 | y <sub>11</sub>                                 |
| 185.5953 <sup>+2</sup> | b <sub>4</sub> -H <sub>3</sub> PO <sub>4</sub> <sup>+2</sup> | 401.2871               | y <sub>3</sub>                                               | 636.7580 <sup>+2</sup> | b <sub>11</sub> -H <sub>3</sub> PO <sub>4</sub> <sup>+2</sup> | 807.8358 <sup>+2</sup> | y <sub>13</sub> <sup>+2</sup>                                 | 1370.4856 | b <sub>11</sub>                                 |
| 201.1472 <sup>+2</sup> | y <sub>3</sub> <sup>+2</sup>                                 | 411.1388               | b <sub>3</sub>                                               | 652.3099 <sup>+2</sup> | y <sub>10</sub> <sup>+2</sup>                                 | 836.8979 <sup>+2</sup> | MH-H <sub>3</sub> PO <sub>4</sub> <sup>+2</sup>               | 1385.5928 | b <sub>12</sub> -H <sub>3</sub> PO <sub>4</sub> |
| 206.0730 <sup>+2</sup> | b <sub>3</sub> <sup>+2</sup>                                 | 441.6769 <sup>+2</sup> | b <sub>7</sub> <sup>+2</sup>                                 | 655.327                | b <sub>6</sub> -H <sub>3</sub> PO <sub>4</sub>                | 882.3465               | b <sub>7</sub>                                                | 1429.6554 | y <sub>12</sub> -H <sub>3</sub> PO <sub>4</sub> |
| 234.5838 <sup>+2</sup> | b <sub>4</sub> <sup>+2</sup>                                 | 445.2167 <sup>+2</sup> | y <sub>7</sub> <sup>+2</sup>                                 | 659.3723               | y <sub>5</sub>                                                | 885.8863 <sup>+2</sup> | MH <sup>+2</sup>                                              | 1483.5697 | b <sub>12</sub>                                 |
| 244.1404               | b <sub>2</sub>                                               | 450.2019 <sup>+2</sup> | b <sub>8</sub> -H <sub>3</sub> PO <sub>4</sub> <sup>+2</sup> | 680.8206 <sup>+2</sup> | y <sub>11</sub> <sup>+2</sup>                                 | 889.4262               | y <sub>7</sub>                                                | 1498.6768 | b <sub>13</sub> -H <sub>3</sub> PO <sub>4</sub> |
| 263.6459 <sup>+2</sup> | b <sub>5</sub> -H <sub>3</sub> PO <sub>4</sub> <sup>+2</sup> | 468.1602               | b <sub>4</sub>                                               | 685.7464 <sup>+2</sup> | b <sub>11</sub> <sup>+2</sup>                                 | 899.3966               | b <sub>8</sub> -H <sub>3</sub> PO <sub>4</sub>                | 1516.6874 | y <sub>13</sub> -H <sub>3</sub> PO <sub>4</sub> |
| 265.6685 <sup>+2</sup> | y <sub>4</sub> <sup>+2</sup>                                 | 499.1904 <sup>+2</sup> | b <sub>8</sub> <sup>+2</sup>                                 | 693.3000 <sup>+2</sup> | b <sub>12</sub> -H <sub>3</sub> PO <sub>4</sub> <sup>+2</sup> | 997.3735               | b <sub>8</sub>                                                | 1527.6323 | y <sub>12</sub>                                 |
| 288.203                | y <sub>2</sub>                                               | 507.7154 <sup>+2</sup> | b <sub>9</sub> -H <sub>3</sub> PO <sub>4</sub> <sup>+2</sup> | 715.3313 <sup>+2</sup> | y <sub>12</sub> -H <sub>3</sub> PO <sub>4</sub> <sup>+2</sup> | 1014.4235              | b <sub>9</sub> -H <sub>3</sub> PO <sub>4</sub>                | 1596.6537 | b <sub>13</sub>                                 |
| 312.6343 <sup>+2</sup> | b <sub>5</sub> <sup>+2</sup>                                 | 509.7380 <sup>+2</sup> | y <sub>8</sub> <sup>+2</sup>                                 | 742.2885 <sup>+2</sup> | b <sub>12</sub> <sup>+2</sup>                                 | 1018.4687              | y <sub>8</sub>                                                | 1614.6643 | y <sub>13</sub>                                 |
| 313.1619               | b <sub>3</sub> -H <sub>3</sub> PO <sub>4</sub>               | 526.2845               | b <sub>5</sub> -H <sub>3</sub> PO <sub>4</sub>               | 749.8421 <sup>+2</sup> | b <sub>13</sub> -H <sub>3</sub> PO <sub>4</sub> <sup>+2</sup> | 1112.4004              | b <sub>9</sub>                                                | 1672.7885 | MH-H <sub>3</sub> PO <sub>4</sub>               |
| 328.1672 <sup>+2</sup> | b <sub>6</sub> -H <sub>3</sub> PO <sub>4</sub> <sup>+2</sup> | 530.3297               | y <sub>4</sub>                                               | 753.3039               | b <sub>6</sub>                                                | 1143.4661              | b <sub>10</sub> -H <sub>3</sub> PO <sub>4</sub>               | 1770.7654 | MH                                              |

MS/MS Fragmentation of QHAALAAQSKsSEDIK  
Found in IPI00515115, Actin binding LIM protein 1

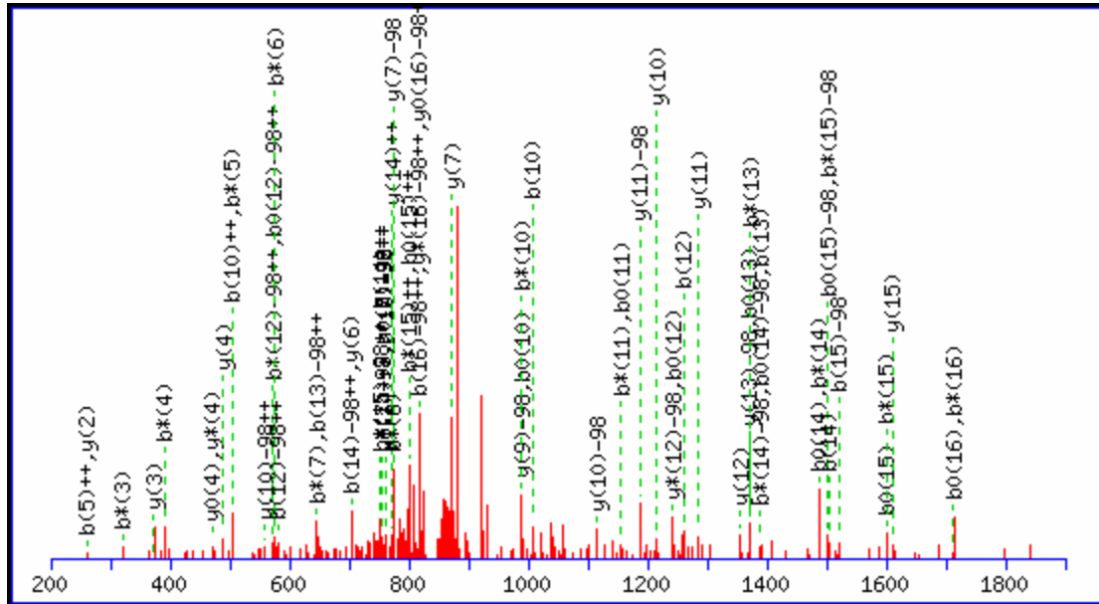

|                        |                                                              |                        |                                                               |                        |                                                               |                        |                                                 |           |                                                 |
|------------------------|--------------------------------------------------------------|------------------------|---------------------------------------------------------------|------------------------|---------------------------------------------------------------|------------------------|-------------------------------------------------|-----------|-------------------------------------------------|
| 74.0600 <sup>+2</sup>  | y <sub>1</sub> <sup>+2</sup>                                 | 436.1941 <sup>+2</sup> | y <sub>7</sub> <sup>+2</sup>                                  | 646.3231 <sup>+2</sup> | b <sub>13</sub> -H <sub>3</sub> PO <sub>4</sub> <sup>+2</sup> | 871.3809               | y <sub>7</sub>                                  | 1356.6407 | y <sub>12</sub>                                 |
| 130.6021 <sup>+2</sup> | y <sub>2</sub> <sup>+2</sup>                                 | 439.7276 <sup>+2</sup> | b <sub>9</sub> <sup>+2</sup>                                  | 663.3573               | b <sub>7</sub>                                                | 874.9326 <sup>+2</sup> | y <sub>16</sub> <sup>+2</sup>                   | 1371.7478 | y <sub>13</sub> -H <sub>3</sub> PO <sub>4</sub> |
| 133.5660 <sup>+2</sup> | b <sub>2</sub> <sup>+2</sup>                                 | 451.2531 <sup>+2</sup> | y <sub>8</sub> -H <sub>3</sub> PO <sub>4</sub> <sup>+2</sup>  | 678.8240 <sup>+2</sup> | y <sub>12</sub> <sup>+2</sup>                                 | 878.4479               | b <sub>9</sub>                                  | 1389.6158 | b <sub>13</sub>                                 |
| 147.1128               | y <sub>1</sub>                                               | 488.3079               | y <sub>4</sub>                                                | 686.3775 <sup>+2</sup> | y <sub>13</sub> -H <sub>3</sub> PO <sub>4</sub> <sup>+2</sup> | 889.9734 <sup>+2</sup> | MH-H <sub>3</sub> PO <sub>4</sub> <sup>+2</sup> | 1406.6659 | b <sub>14</sub> -H <sub>3</sub> PO <sub>4</sub> |
| 169.0846 <sup>+2</sup> | b <sub>3</sub> <sup>+2</sup>                                 | 494.7691 <sup>+2</sup> | y <sub>9</sub> -H <sub>3</sub> PO <sub>4</sub> <sup>+2</sup>  | 695.3116 <sup>+2</sup> | b <sub>13</sub> <sup>+2</sup>                                 | 901.4989               | y <sub>8</sub> -H <sub>3</sub> PO <sub>4</sub>  | 1442.7849 | y <sub>14</sub> -H <sub>3</sub> PO <sub>4</sub> |
| 187.1441 <sup>+2</sup> | y <sub>3</sub> <sup>+2</sup>                                 | 500.2415 <sup>+2</sup> | y <sub>8</sub> <sup>+2</sup>                                  | 703.8366 <sup>+2</sup> | b <sub>14</sub> -H <sub>3</sub> PO <sub>4</sub> <sup>+2</sup> | 938.9619 <sup>+2</sup> | MH <sup>+2</sup>                                | 1469.7247 | y <sub>13</sub>                                 |
| 204.6031 <sup>+2</sup> | b <sub>4</sub> <sup>+2</sup>                                 | 503.7751 <sup>+2</sup> | b <sub>10</sub> <sup>+2</sup>                                 | 704.3825               | y <sub>6</sub>                                                | 988.531                | y <sub>9</sub> -H <sub>3</sub> PO <sub>4</sub>  | 1504.6428 | b <sub>14</sub>                                 |
| 244.6576 <sup>+2</sup> | y <sub>4</sub> <sup>+2</sup>                                 | 521.2831               | b <sub>5</sub>                                                | 721.8961 <sup>+2</sup> | y <sub>14</sub> -H <sub>3</sub> PO <sub>4</sub> <sup>+2</sup> | 999.4758               | y <sub>8</sub>                                  | 1513.822  | y <sub>15</sub> -H <sub>3</sub> PO <sub>4</sub> |
| 260.1969               | y <sub>2</sub>                                               | 538.2858 <sup>+2</sup> | b <sub>11</sub> -H <sub>3</sub> PO <sub>4</sub> <sup>+2</sup> | 735.3660 <sup>+2</sup> | y <sub>13</sub> <sup>+2</sup>                                 | 1006.5429              | b <sub>10</sub>                                 | 1519.7499 | b <sub>15</sub> -H <sub>3</sub> PO <sub>4</sub> |
| 261.1452 <sup>+2</sup> | b <sub>5</sub> <sup>+2</sup>                                 | 543.7576 <sup>+2</sup> | y <sub>9</sub> <sup>+2</sup>                                  | 752.8250 <sup>+2</sup> | b <sub>14</sub> <sup>+2</sup>                                 | 1075.5643              | b <sub>11</sub> -H <sub>3</sub> PO <sub>4</sub> | 1540.7618 | y <sub>14</sub>                                 |
| 266.1248               | b <sub>2</sub>                                               | 558.7984 <sup>+2</sup> | y <sub>10</sub> -H <sub>3</sub> PO <sub>4</sub> <sup>+2</sup> | 757.4147 <sup>+2</sup> | y <sub>15</sub> -H <sub>3</sub> PO <sub>4</sub> <sup>+2</sup> | 1086.5078              | y <sub>9</sub>                                  | 1611.7989 | y <sub>15</sub>                                 |
| 296.6637 <sup>+2</sup> | b <sub>6</sub> <sup>+2</sup>                                 | 581.8018 <sup>+2</sup> | b <sub>12</sub> -H <sub>3</sub> PO <sub>4</sub> <sup>+2</sup> | 760.3786 <sup>+2</sup> | b <sub>15</sub> -H <sub>3</sub> PO <sub>4</sub> <sup>+2</sup> | 1116.5895              | y <sub>10</sub> -H <sub>3</sub> PO <sub>4</sub> | 1617.7268 | b <sub>15</sub>                                 |
| 309.1789 <sup>+2</sup> | y <sub>5</sub> <sup>+2</sup>                                 | 587.2742 <sup>+2</sup> | b <sub>11</sub> <sup>+2</sup>                                 | 770.8846 <sup>+2</sup> | y <sub>14</sub> <sup>+2</sup>                                 | 1162.5963              | b <sub>12</sub> -H <sub>3</sub> PO <sub>4</sub> | 1632.834  | b <sub>16</sub> -H <sub>3</sub> PO <sub>4</sub> |
| 332.1823 <sup>+2</sup> | b <sub>7</sub> <sup>+2</sup>                                 | 592.3202               | b <sub>6</sub>                                                | 773.404                | y <sub>7</sub> -H <sub>3</sub> PO <sub>4</sub>                | 1173.5412              | b <sub>11</sub>                                 | 1650.881  | y <sub>16</sub> -H <sub>3</sub> PO <sub>4</sub> |
| 337.1619               | b <sub>3</sub>                                               | 594.3170 <sup>+2</sup> | y <sub>11</sub> -H <sub>3</sub> PO <sub>4</sub> <sup>+2</sup> | 791.4159               | b <sub>8</sub>                                                | 1187.6266              | y <sub>11</sub> -H <sub>3</sub> PO <sub>4</sub> | 1730.8109 | b <sub>16</sub>                                 |
| 352.6949 <sup>+2</sup> | y <sub>6</sub> <sup>+2</sup>                                 | 607.7869 <sup>+2</sup> | y <sub>10</sub> <sup>+2</sup>                                 | 806.4031 <sup>+2</sup> | y <sub>15</sub> <sup>+2</sup>                                 | 1214.5664              | y <sub>10</sub>                                 | 1748.8579 | y <sub>16</sub>                                 |
| 373.2809               | y <sub>3</sub>                                               | 617.3505               | y <sub>5</sub>                                                | 809.3671 <sup>+2</sup> | b <sub>15</sub> <sup>+2</sup>                                 | 1258.6638              | y <sub>12</sub> -H <sub>3</sub> PO <sub>4</sub> | 1778.9395 | MH-H <sub>3</sub> PO <sub>4</sub>               |
| 387.2056 <sup>+2</sup> | y <sub>7</sub> -H <sub>3</sub> PO <sub>4</sub> <sup>+2</sup> | 629.8355 <sup>+2</sup> | y <sub>12</sub> -H <sub>3</sub> PO <sub>4</sub> <sup>+2</sup> | 816.9206 <sup>+2</sup> | b <sub>16</sub> -H <sub>3</sub> PO <sub>4</sub> <sup>+2</sup> | 1260.5732              | b <sub>12</sub>                                 | 1876.9164 | MH                                              |
| 396.2116 <sup>+2</sup> | b <sub>8</sub> <sup>+2</sup>                                 | 630.7903 <sup>+2</sup> | b <sub>12</sub> <sup>+2</sup>                                 | 825.9441 <sup>+2</sup> | y <sub>16</sub> -H <sub>3</sub> PO <sub>4</sub> <sup>+2</sup> | 1285.6035              | y <sub>11</sub>                                 |           |                                                 |
| 408.199                | b <sub>4</sub>                                               | 643.3054 <sup>+2</sup> | y <sub>11</sub> <sup>+2</sup>                                 | 865.9091 <sup>+2</sup> | b <sub>16</sub> <sup>+2</sup>                                 | 1291.6389              | b <sub>13</sub> -H <sub>3</sub> PO <sub>4</sub> |           |                                                 |



MS/MS Fragmentation of GVsmPNmLEPK  
 Found in IPI00515115, Actin binding LIM protein 1

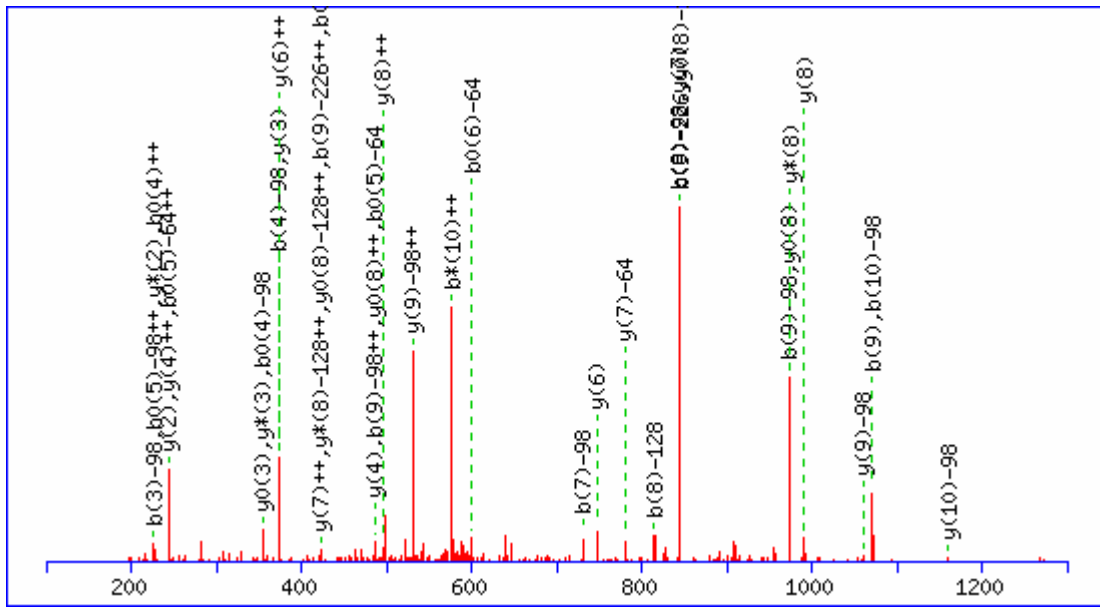

|                        |                                                |                        |                                                |                        |                                                               |          |                                                |           |                                                 |
|------------------------|------------------------------------------------|------------------------|------------------------------------------------|------------------------|---------------------------------------------------------------|----------|------------------------------------------------|-----------|-------------------------------------------------|
| 74.0600 <sup>+2</sup>  | y <sub>1</sub> <sup>+2</sup>                   | 324.0955               | b <sub>3</sub>                                 | 530.7437 <sup>+2</sup> | y <sub>9</sub> -H <sub>3</sub> PO <sub>4</sub> <sup>+2</sup>  | 682.2266 | b <sub>6</sub>                                 | 1060.4802 | y <sub>9</sub> -H <sub>3</sub> PO <sub>4</sub>  |
| 122.5864 <sup>+2</sup> | y <sub>2</sub> <sup>+2</sup>                   | 373.154                | b <sub>4</sub> -H <sub>3</sub> PO <sub>4</sub> | 568.1837               | b <sub>5</sub>                                                | 731.2851 | b <sub>7</sub> -H <sub>3</sub> PO <sub>4</sub> | 1070.4645 | b <sub>10</sub> -H <sub>3</sub> PO <sub>4</sub> |
| 147.1128               | y <sub>1</sub>                                 | 373.2082               | y <sub>3</sub>                                 | 579.7322 <sup>+2</sup> | y <sub>9</sub> <sup>+2</sup>                                  | 747.3706 | y <sub>6</sub>                                 | 1071.3887 | b <sub>9</sub>                                  |
| 157.0972               | b <sub>2</sub>                                 | 374.1889 <sup>+2</sup> | y <sub>6</sub> <sup>+2</sup>                   | 580.2779 <sup>+2</sup> | y <sub>10</sub> -H <sub>3</sub> PO <sub>4</sub> <sup>+2</sup> | 829.262  | b <sub>7</sub>                                 | 1158.4571 | y <sub>9</sub>                                  |
| 187.1077 <sup>+2</sup> | y <sub>3</sub> <sup>+2</sup>                   | 422.7153 <sup>+2</sup> | y <sub>7</sub> <sup>+2</sup>                   | 584.2497               | b <sub>6</sub> -H <sub>3</sub> PO <sub>4</sub>                | 844.3692 | b <sub>8</sub> -H <sub>3</sub> PO <sub>4</sub> | 1159.5486 | y <sub>10</sub> -H <sub>3</sub> PO <sub>4</sub> |
| 226.1186               | b <sub>3</sub> -H <sub>3</sub> PO <sub>4</sub> | 470.2068               | b <sub>5</sub> -H <sub>3</sub> PO <sub>4</sub> | 608.7887 <sup>+2</sup> | MH-H <sub>3</sub> PO <sub>4</sub> <sup>+2</sup>               | 844.4233 | y <sub>7</sub>                                 | 1168.4414 | b <sub>10</sub>                                 |
| 243.6498 <sup>+2</sup> | y <sub>4</sub> <sup>+2</sup>                   | 471.1309               | b <sub>4</sub>                                 | 629.2664 <sup>+2</sup> | y <sub>10</sub> <sup>+2</sup>                                 | 942.3461 | b <sub>8</sub>                                 | 1216.5701 | MH-H <sub>3</sub> PO <sub>4</sub>               |
| 244.1656               | y <sub>2</sub>                                 | 486.2922               | y <sub>4</sub>                                 | 633.3276               | y <sub>5</sub>                                                | 973.4118 | b <sub>9</sub> -H <sub>3</sub> PO <sub>4</sub> | 1257.5255 | y <sub>10</sub>                                 |
| 317.1675 <sup>+2</sup> | y <sub>5</sub> <sup>+2</sup>                   | 496.2330 <sup>+2</sup> | y <sub>8</sub> <sup>+2</sup>                   | 657.7771 <sup>+2</sup> | MH <sup>+2</sup>                                              | 991.4587 | y <sub>8</sub>                                 | 1314.547  | MH                                              |

MS/MS Fragmentation of ALSSGGSITsPPLSPALPK  
 Found in IPI00169434, Hypothetical protein DKFZp686O20169

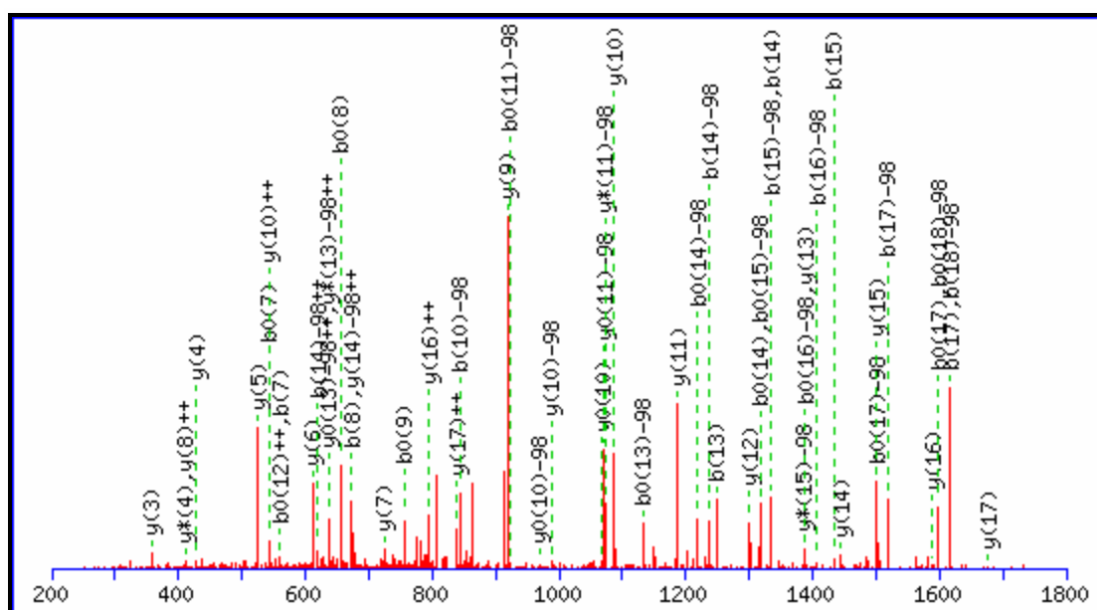

|                        |                              |                        |                                                               |                        |                                                               |           |                                                 |           |                                                 |
|------------------------|------------------------------|------------------------|---------------------------------------------------------------|------------------------|---------------------------------------------------------------|-----------|-------------------------------------------------|-----------|-------------------------------------------------|
| 74.0600 <sup>+2</sup>  | y <sub>1</sub> <sup>+2</sup> | 473.2354               | b <sub>6</sub>                                                | 745.9143 <sup>+2</sup> | y <sub>16</sub> -H <sub>3</sub> PO <sub>4</sub> <sup>+2</sup> | 1038.4503 | b <sub>11</sub>                                 | 1432.672  | b <sub>15</sub>                                 |
| 122.5864 <sup>+2</sup> | y <sub>2</sub> <sup>+2</sup> | 494.7949 <sup>+2</sup> | y <sub>10</sub> -H <sub>3</sub> PO <sub>4</sub> <sup>+2</sup> | 751.3867 <sup>+2</sup> | y <sub>15</sub> <sup>+2</sup>                                 | 1086.5595 | y <sub>10</sub>                                 | 1444.7447 | y <sub>14</sub>                                 |
| 147.1128               | y <sub>1</sub>               | 525.3395               | y <sub>5</sub>                                                | 774.3992               | b <sub>9</sub>                                                | 1089.6303 | y <sub>11</sub> -H <sub>3</sub> PO <sub>4</sub> | 1490.8213 | y <sub>16</sub> -H <sub>3</sub> PO <sub>4</sub> |
| 179.1285 <sup>+2</sup> | y <sub>3</sub> <sup>+2</sup> | 543.7834 <sup>+2</sup> | y <sub>10</sub> <sup>+2</sup>                                 | 789.4303 <sup>+2</sup> | y <sub>17</sub> -H <sub>3</sub> PO <sub>4</sub> <sup>+2</sup> | 1135.5031 | b <sub>12</sub>                                 | 1501.7662 | y <sub>15</sub>                                 |
| 185.1285               | b <sub>2</sub>               | 545.3188 <sup>+2</sup> | y <sub>11</sub> -H <sub>3</sub> PO <sub>4</sub> <sup>+2</sup> | 794.9027 <sup>+2</sup> | y <sub>16</sub> <sup>+2</sup>                                 | 1150.6103 | b <sub>13</sub> -H <sub>3</sub> PO <sub>4</sub> | 1503.7091 | b <sub>16</sub>                                 |
| 214.6470 <sup>+2</sup> | y <sub>4</sub> <sup>+2</sup> | 560.2675               | b <sub>7</sub>                                                | 822.5084               | y <sub>8</sub>                                                | 1187.6072 | y <sub>11</sub>                                 | 1518.8162 | b <sub>17</sub> -H <sub>3</sub> PO <sub>4</sub> |
| 244.1656               | y <sub>2</sub>               | 594.3072 <sup>+2</sup> | y <sub>11</sub> <sup>+2</sup>                                 | 838.4188 <sup>+2</sup> | y <sub>17</sub> <sup>+2</sup>                                 | 1202.7143 | y <sub>12</sub> -H <sub>3</sub> PO <sub>4</sub> | 1577.8533 | y <sub>17</sub> -H <sub>3</sub> PO <sub>4</sub> |
| 263.1734 <sup>+2</sup> | y <sub>5</sub> <sup>+2</sup> | 601.8608 <sup>+2</sup> | y <sub>12</sub> -H <sub>3</sub> PO <sub>4</sub> <sup>+2</sup> | 843.4207               | b <sub>10</sub> -H <sub>3</sub> PO <sub>4</sub>               | 1237.6423 | b <sub>14</sub> -H <sub>3</sub> PO <sub>4</sub> | 1588.7982 | y <sub>16</sub>                                 |
| 272.1605               | b <sub>3</sub>               | 612.3715               | y <sub>6</sub>                                                | 845.9723 <sup>+2</sup> | y <sub>18</sub> -H <sub>3</sub> PO <sub>4</sub> <sup>+2</sup> | 1248.5872 | b <sub>13</sub>                                 | 1615.869  | b <sub>18</sub> -H <sub>3</sub> PO <sub>4</sub> |
| 306.6894 <sup>+2</sup> | y <sub>6</sub> <sup>+2</sup> | 645.3768 <sup>+2</sup> | y <sub>13</sub> -H <sub>3</sub> PO <sub>4</sub> <sup>+2</sup> | 881.4909 <sup>+2</sup> | MH-H <sub>3</sub> PO <sub>4</sub> <sup>+2</sup>               | 1289.7464 | y <sub>13</sub> -H <sub>3</sub> PO <sub>4</sub> | 1616.7931 | b <sub>17</sub>                                 |
| 357.2496               | y <sub>3</sub>               | 650.8493 <sup>+2</sup> | y <sub>12</sub> <sup>+2</sup>                                 | 894.9608 <sup>+2</sup> | y <sub>18</sub> <sup>+2</sup>                                 | 1300.6912 | y <sub>12</sub>                                 | 1675.8302 | y <sub>17</sub>                                 |
| 359.1925               | b <sub>4</sub>               | 673.3515               | b <sub>8</sub>                                                | 919.5611               | y <sub>9</sub>                                                | 1334.6951 | b <sub>15</sub> -H <sub>3</sub> PO <sub>4</sub> | 1690.9374 | y <sub>18</sub> -H <sub>3</sub> PO <sub>4</sub> |
| 363.2314 <sup>+2</sup> | y <sub>7</sub> <sup>+2</sup> | 673.8876 <sup>+2</sup> | y <sub>14</sub> -H <sub>3</sub> PO <sub>4</sub> <sup>+2</sup> | 930.4793 <sup>+2</sup> | MH <sup>+2</sup>                                              | 1335.6192 | b <sub>14</sub>                                 | 1713.8459 | b <sub>18</sub>                                 |
| 411.7578 <sup>+2</sup> | y <sub>8</sub> <sup>+2</sup> | 694.3653 <sup>+2</sup> | y <sub>13</sub> <sup>+2</sup>                                 | 940.4734               | b <sub>11</sub> -H <sub>3</sub> PO <sub>4</sub>               | 1346.7678 | y <sub>14</sub> -H <sub>3</sub> PO <sub>4</sub> | 1761.9745 | MH-H <sub>3</sub> PO <sub>4</sub>               |
| 416.214                | b <sub>5</sub>               | 702.3983 <sup>+2</sup> | y <sub>15</sub> -H <sub>3</sub> PO <sub>4</sub> <sup>+2</sup> | 941.3976               | b <sub>10</sub>                                               | 1387.7233 | y <sub>13</sub>                                 | 1788.9143 | y <sub>18</sub>                                 |
| 428.2867               | y <sub>4</sub>               | 722.8760 <sup>+2</sup> | y <sub>14</sub> <sup>+2</sup>                                 | 988.5826               | y <sub>10</sub> -H <sub>3</sub> PO <sub>4</sub>               | 1403.7893 | y <sub>15</sub> -H <sub>3</sub> PO <sub>4</sub> | 1859.9514 | MH                                              |
| 460.2842 <sup>+2</sup> | y <sub>9</sub> <sup>+2</sup> | 725.4556               | y <sub>7</sub>                                                | 1037.5262              | b <sub>12</sub> -H <sub>3</sub> PO <sub>4</sub>               | 1405.7322 | b <sub>16</sub> -H <sub>3</sub> PO <sub>4</sub> |           |                                                 |

MS/MS Fragmentation of AALsQQQQQLALLLQQFQTLK  
 Found in IPI00169434, Hypothetical protein DKFZp686O20169

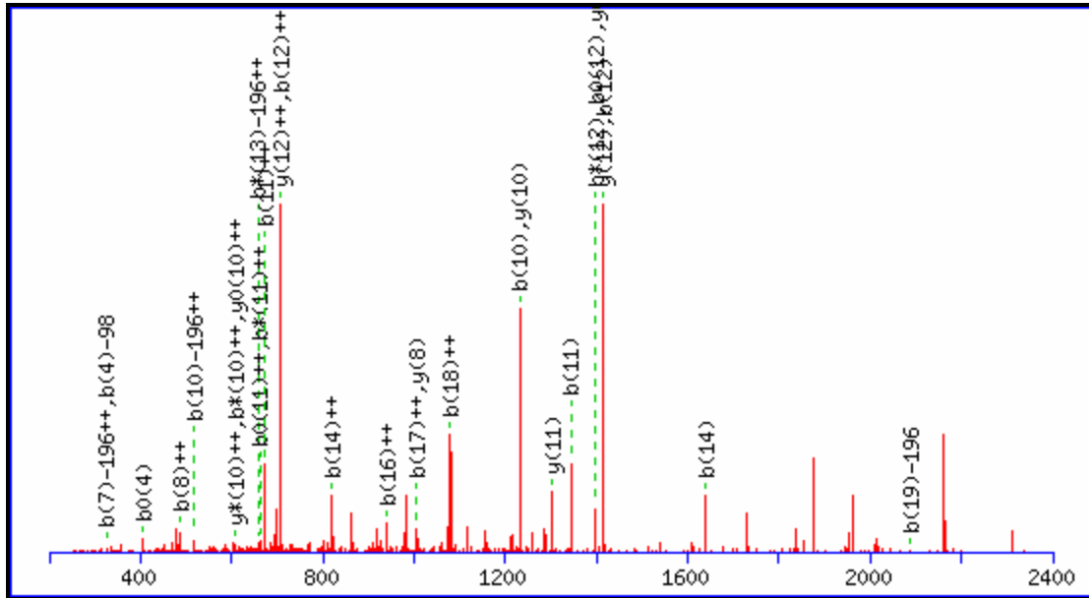

|                        |                                                 |                         |                                                                |                         |                                                                |           |                                                  |           |                                                  |
|------------------------|-------------------------------------------------|-------------------------|----------------------------------------------------------------|-------------------------|----------------------------------------------------------------|-----------|--------------------------------------------------|-----------|--------------------------------------------------|
| 74.0600 <sup>+2</sup>  | y <sub>1</sub> <sup>+2</sup>                    | 636.3715                | y <sub>5</sub>                                                 | 1102.3966               | b <sub>9</sub>                                                 | 1414.5764 | b <sub>12</sub>                                  | 2089.1189 | b <sub>19</sub> -2H <sub>3</sub> PO <sub>4</sub> |
| 130.6021 <sup>+2</sup> | y <sub>2</sub> <sup>+2</sup>                    | 650.3257                | b <sub>7</sub> -2H <sub>3</sub> PO <sub>4</sub>                | 1112.0803 <sup>+2</sup> | y <sub>18</sub> <sup>+2</sup>                                  | 1415.8621 | y <sub>12</sub>                                  | 2125.1764 | y <sub>18</sub> -H <sub>3</sub> PO <sub>4</sub>  |
| 143.0815               | b <sub>2</sub>                                  | 651.8926 <sup>+2</sup>  | y <sub>11</sub> <sup>+2</sup>                                  | 1118.6568               | y <sub>9</sub>                                                 | 1429.6835 | b <sub>13</sub> -H <sub>3</sub> PO <sub>4</sub>  | 2157.0141 | b <sub>18</sub>                                  |
| 147.1128               | y <sub>1</sub>                                  | 708.4347 <sup>+2</sup>  | y <sub>12</sub> <sup>+2</sup>                                  | 1132.4783               | b <sub>10</sub> -H <sub>3</sub> PO <sub>4</sub>                | 1444.7907 | b <sub>14</sub> -2H <sub>3</sub> PO <sub>4</sub> | 2187.0958 | b <sub>19</sub> -H <sub>3</sub> PO <sub>4</sub>  |
| 181.1259 <sup>+2</sup> | y <sub>3</sub> <sup>+2</sup>                    | 718.2209                | b <sub>6</sub>                                                 | 1146.5910 <sup>+2</sup> | y <sub>19</sub> -H <sub>3</sub> PO <sub>4</sub> <sup>+2</sup>  | 1527.6604 | b <sub>13</sub>                                  | 2190.1666 | b <sub>20</sub> -2H <sub>3</sub> PO <sub>4</sub> |
| 245.1552 <sup>+2</sup> | y <sub>4</sub> <sup>+2</sup>                    | 748.3025                | b <sub>7</sub> -H <sub>3</sub> PO <sub>4</sub>                 | 1147.5854               | y <sub>20</sub> -2H <sub>3</sub> PO <sub>4</sub> <sup>+2</sup> | 1542.7676 | b <sub>14</sub> -H <sub>3</sub> PO <sub>4</sub>  | 2194.1979 | y <sub>19</sub> -2H <sub>3</sub> PO <sub>4</sub> |
| 256.1656               | b <sub>3</sub>                                  | 764.4301                | y <sub>6</sub>                                                 | 1154.1446 <sup>+2</sup> | y <sub>21</sub> -2H <sub>3</sub> PO <sub>4</sub> <sup>+2</sup> | 1543.9206 | y <sub>13</sub>                                  | 2223.1533 | y <sub>18</sub>                                  |
| 260.1969               | y <sub>2</sub>                                  | 772.4640 <sup>+2</sup>  | y <sub>13</sub> <sup>+2</sup>                                  | 1189.6632 <sup>+2</sup> | y <sub>21</sub> -2H <sub>3</sub> PO <sub>4</sub> <sup>+2</sup> | 1557.8748 | b <sub>15</sub> -2H <sub>3</sub> PO <sub>4</sub> | 2285.0727 | b <sub>19</sub>                                  |
| 318.6894 <sup>+2</sup> | y <sub>5</sub> <sup>+2</sup>                    | 778.3842                | b <sub>8</sub> -2H <sub>3</sub> PO <sub>4</sub>                | 1195.5795 <sup>+2</sup> | y <sub>19</sub> <sup>+2</sup>                                  | 1640.7445 | b <sub>14</sub>                                  | 2288.1435 | b <sub>20</sub> -H <sub>3</sub> PO <sub>4</sub>  |
| 325.187                | b <sub>4</sub> -H <sub>3</sub> PO <sub>4</sub>  | 836.4932 <sup>+2</sup>  | y <sub>14</sub> <sup>+2</sup>                                  | 1203.1331 <sup>+2</sup> | y <sub>20</sub> -H <sub>3</sub> PO <sub>4</sub> <sup>+2</sup>  | 1655.8516 | b <sub>15</sub> -H <sub>3</sub> PO <sub>4</sub>  | 2292.1748 | y <sub>19</sub> -H <sub>3</sub> PO <sub>4</sub>  |
| 361.2445               | y <sub>3</sub>                                  | 846.2794                | b <sub>7</sub>                                                 | 1218.6226               | b <sub>12</sub> -2H <sub>3</sub> PO <sub>4</sub>               | 1671.9792 | y <sub>14</sub>                                  | 2303.2506 | b <sub>21</sub> -2H <sub>3</sub> PO <sub>4</sub> |
| 382.7187 <sup>+2</sup> | y <sub>6</sub> <sup>+2</sup>                    | 876.3611                | b <sub>8</sub> -H <sub>3</sub> PO <sub>4</sub>                 | 1230.4552               | b <sub>10</sub>                                                | 1685.9333 | b <sub>16</sub> -2H <sub>3</sub> PO <sub>4</sub> | 2307.2819 | y <sub>20</sub> -2H <sub>3</sub> PO <sub>4</sub> |
| 394.2085               | b <sub>5</sub> -2H <sub>3</sub> PO <sub>4</sub> | 892.4887                | y <sub>7</sub>                                                 | 1231.7409               | y <sub>10</sub>                                                | 1753.8285 | b <sub>15</sub>                                  | 2378.3191 | y <sub>21</sub> -2H <sub>3</sub> PO <sub>4</sub> |
| 423.1639               | b <sub>4</sub>                                  | 900.5225 <sup>+2</sup>  | y <sub>15</sub> <sup>+2</sup>                                  | 1238.6516 <sup>+2</sup> | y <sub>21</sub> -H <sub>3</sub> PO <sub>4</sub> <sup>+2</sup>  | 1783.9102 | b <sub>16</sub> -H <sub>3</sub> PO <sub>4</sub>  | 2386.1204 | b <sub>20</sub>                                  |
| 446.7480 <sup>+2</sup> | y <sub>7</sub> <sup>+2</sup>                    | 906.4428                | b <sub>9</sub> -2H <sub>3</sub> PO <sub>4</sub>                | 1245.5623               | b <sub>11</sub> -H <sub>3</sub> PO <sub>4</sub>                | 1800.0378 | y <sub>15</sub>                                  | 2390.1517 | y <sub>19</sub>                                  |
| 489.3031               | y <sub>4</sub>                                  | 964.5518 <sup>+2</sup>  | y <sub>16</sub> <sup>+2</sup>                                  | 1252.1215 <sup>+2</sup> | y <sub>20</sub> <sup>+2</sup>                                  | 1813.9919 | b <sub>17</sub> -2H <sub>3</sub> PO <sub>4</sub> | 2401.2275 | b <sub>21</sub> -H <sub>3</sub> PO <sub>4</sub>  |
| 492.1854               | b <sub>5</sub> -H <sub>3</sub> PO <sub>4</sub>  | 974.338                 | b <sub>8</sub>                                                 | 1274.1702 <sup>+2</sup> | MH-H <sub>3</sub> PO <sub>4</sub> <sup>+2</sup>                | 1881.8871 | b <sub>16</sub>                                  | 2405.2588 | y <sub>20</sub> -H <sub>3</sub> PO <sub>4</sub>  |
| 503.2900 <sup>+2</sup> | y <sub>8</sub> <sup>+2</sup>                    | 1004.4197               | b <sub>9</sub> -H <sub>3</sub> PO <sub>4</sub>                 | 1287.6401 <sup>+2</sup> | y <sub>21</sub> <sup>+2</sup>                                  | 1911.9688 | b <sub>17</sub> -H <sub>3</sub> PO <sub>4</sub>  | 2476.296  | y <sub>21</sub> -H <sub>3</sub> PO <sub>4</sub>  |
| 522.2671               | b <sub>6</sub> -2H <sub>3</sub> PO <sub>4</sub> | 1005.5728               | y <sub>8</sub>                                                 | 1302.778                | y <sub>11</sub>                                                | 1928.0964 | y <sub>16</sub>                                  | 2499.2044 | b <sub>21</sub>                                  |
| 559.8320 <sup>+2</sup> | y <sub>9</sub> <sup>+2</sup>                    | 1028.5811 <sup>+2</sup> | y <sub>17</sub> <sup>+2</sup>                                  | 1316.5995               | b <sub>12</sub> -H <sub>3</sub> PO <sub>4</sub>                | 1961.0603 | b <sub>18</sub> -2H <sub>3</sub> PO <sub>4</sub> | 2503.2357 | y <sub>20</sub>                                  |
| 590.1623               | b <sub>5</sub>                                  | 1034.5014               | b <sub>10</sub> -2H <sub>3</sub> PO <sub>4</sub>               | 1323.1586 <sup>+2</sup> | MH <sup>+2</sup>                                               | 2009.9457 | b <sub>17</sub>                                  | 2547.3331 | MH-H <sub>3</sub> PO <sub>4</sub>                |
| 616.3741 <sup>+2</sup> | y <sub>10</sub> <sup>+2</sup>                   | 1063.0918 <sup>+2</sup> | y <sub>18</sub> -H <sub>3</sub> PO <sub>4</sub> <sup>+2</sup>  | 1331.7066               | b <sub>13</sub> -2H <sub>3</sub> PO <sub>4</sub>               | 2056.155  | y <sub>17</sub>                                  | 2574.2728 | y <sub>21</sub>                                  |
| 620.244                | b <sub>6</sub> -H <sub>3</sub> PO <sub>4</sub>  | 1097.6026 <sup>+2</sup> | y <sub>19</sub> -2H <sub>3</sub> PO <sub>4</sub> <sup>+2</sup> | 1343.5392               | b <sub>11</sub>                                                | 2059.0372 | b <sub>18</sub> -H <sub>3</sub> PO <sub>4</sub>  | 2645.31   | MH                                               |

MS/MS Fragmentation of RAsLQASTAAPEAR  
 Found in IPI0007722, Adenosine monophosphate deaminase 2

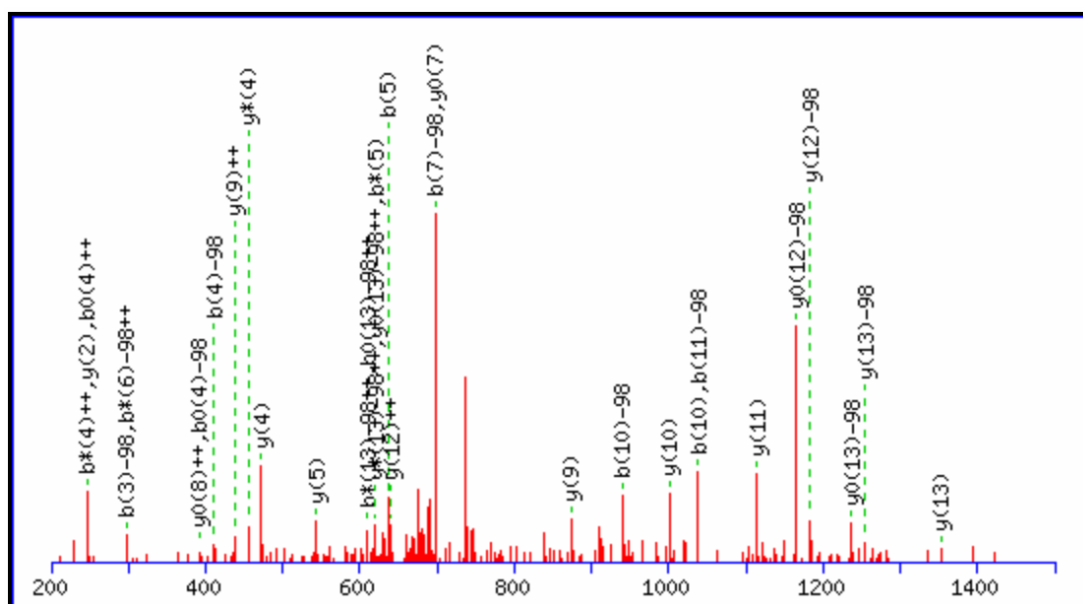

|                        |                                                              |                        |                                                               |                        |                                                               |                        |                                                 |           |                                                 |
|------------------------|--------------------------------------------------------------|------------------------|---------------------------------------------------------------|------------------------|---------------------------------------------------------------|------------------------|-------------------------------------------------|-----------|-------------------------------------------------|
| 88.0631 <sup>+2</sup>  | y <sub>1</sub> <sup>+2</sup>                                 | 307.6665 <sup>+2</sup> | y <sub>6</sub> <sup>+2</sup>                                  | 483.7239 <sup>+2</sup> | b <sub>9</sub> <sup>+2</sup>                                  | 636.2865               | b <sub>5</sub>                                  | 966.4404  | b <sub>9</sub>                                  |
| 114.5764 <sup>+2</sup> | b <sub>2</sub> <sup>+2</sup>                                 | 318.6469 <sup>+2</sup> | b <sub>5</sub> <sup>+2</sup>                                  | 501.2542 <sup>+2</sup> | y <sub>10</sub> <sup>+2</sup>                                 | 641.2954 <sup>+2</sup> | y <sub>12</sub> <sup>+2</sup>                   | 1001.501  | y <sub>10</sub>                                 |
| 123.5817 <sup>+2</sup> | y <sub>2</sub> <sup>+2</sup>                                 | 348.6930 <sup>+2</sup> | b <sub>7</sub> -H <sub>3</sub> PO <sub>4</sub> <sup>+2</sup>  | 508.2279               | b <sub>4</sub>                                                | 667.8086 <sup>+2</sup> | b <sub>13</sub> <sup>+2</sup>                   | 1036.5534 | b <sub>11</sub> -H <sub>3</sub> PO <sub>4</sub> |
| 149.0871 <sup>+2</sup> | b <sub>3</sub> -H <sub>3</sub> PO <sub>4</sub> <sup>+2</sup> | 354.1654 <sup>+2</sup> | b <sub>6</sub> <sup>+2</sup>                                  | 518.7803 <sup>+2</sup> | b <sub>11</sub> -H <sub>3</sub> PO <sub>4</sub> <sup>+2</sup> | 676.8139 <sup>+2</sup> | y <sub>13</sub> <sup>+2</sup>                   | 1037.4775 | b <sub>10</sub>                                 |
| 175.119                | y <sub>1</sub>                                               | 358.1903 <sup>+2</sup> | y <sub>7</sub> <sup>+2</sup>                                  | 519.2424 <sup>+2</sup> | b <sub>10</sub> <sup>+2</sup>                                 | 696.3787               | b <sub>7</sub> -H <sub>3</sub> PO <sub>4</sub>  | 1114.5851 | y <sub>11</sub>                                 |
| 188.1030 <sup>+2</sup> | y <sub>3</sub> <sup>+2</sup>                                 | 375.1987               | y <sub>3</sub>                                                | 538.3096               | b <sub>5</sub> -H <sub>3</sub> PO <sub>4</sub>                | 705.8760 <sup>+2</sup> | MH-H <sub>3</sub> PO <sub>4</sub> <sup>+2</sup> | 1134.5303 | b <sub>11</sub>                                 |
| 198.0756 <sup>+2</sup> | b <sub>3</sub> <sup>+2</sup>                                 | 395.1439               | b <sub>3</sub>                                                | 543.2885               | y <sub>5</sub>                                                | 707.3236               | b <sub>6</sub>                                  | 1165.596  | b <sub>12</sub> -H <sub>3</sub> PO <sub>4</sub> |
| 205.6292 <sup>+2</sup> | b <sub>4</sub> -H <sub>3</sub> PO <sub>4</sub> <sup>+2</sup> | 397.6815 <sup>+2</sup> | b <sub>7</sub> <sup>+2</sup>                                  | 557.7962 <sup>+2</sup> | y <sub>11</sub> <sup>+2</sup>                                 | 715.3733               | y <sub>7</sub>                                  | 1183.6066 | y <sub>12</sub> -H <sub>3</sub> PO <sub>4</sub> |
| 228.1455               | b <sub>2</sub>                                               | 399.2169 <sup>+2</sup> | b <sub>8</sub> -H <sub>3</sub> PO <sub>4</sub> <sup>+2</sup>  | 567.7688 <sup>+2</sup> | b <sub>11</sub> <sup>+2</sup>                                 | 754.8645 <sup>+2</sup> | MH <sup>+2</sup>                                | 1236.6331 | b <sub>13</sub> -H <sub>3</sub> PO <sub>4</sub> |
| 236.6293 <sup>+2</sup> | y <sub>4</sub> <sup>+2</sup>                                 | 401.7063 <sup>+2</sup> | y <sub>8</sub> <sup>+2</sup>                                  | 583.3016 <sup>+2</sup> | b <sub>12</sub> -H <sub>3</sub> PO <sub>4</sub> <sup>+2</sup> | 794.3556               | b <sub>7</sub>                                  | 1254.6437 | y <sub>13</sub> -H <sub>3</sub> PO <sub>4</sub> |
| 246.1561               | y <sub>2</sub>                                               | 410.251                | b <sub>4</sub> -H <sub>3</sub> PO <sub>4</sub>                | 592.3069 <sup>+2</sup> | y <sub>12</sub> -H <sub>3</sub> PO <sub>4</sub> <sup>+2</sup> | 797.4264               | b <sub>8</sub> -H <sub>3</sub> PO <sub>4</sub>  | 1263.5729 | b <sub>12</sub>                                 |
| 254.6176 <sup>+2</sup> | b <sub>4</sub> <sup>+2</sup>                                 | 434.7354 <sup>+2</sup> | b <sub>9</sub> -H <sub>3</sub> PO <sub>4</sub> <sup>+2</sup>  | 609.3467               | b <sub>6</sub> -H <sub>3</sub> PO <sub>4</sub>                | 802.4054               | y <sub>8</sub>                                  | 1281.5835 | y <sub>12</sub>                                 |
| 269.6584 <sup>+2</sup> | b <sub>5</sub> -H <sub>3</sub> PO <sub>4</sub> <sup>+2</sup> | 437.2249 <sup>+2</sup> | y <sub>9</sub> <sup>+2</sup>                                  | 614.3257               | y <sub>6</sub>                                                | 868.4635               | b <sub>9</sub> -H <sub>3</sub> PO <sub>4</sub>  | 1334.61   | b <sub>13</sub>                                 |
| 272.1479 <sup>+2</sup> | y <sub>5</sub> <sup>+2</sup>                                 | 448.2053 <sup>+2</sup> | b <sub>8</sub> <sup>+2</sup>                                  | 618.8202 <sup>+2</sup> | b <sub>13</sub> -H <sub>3</sub> PO <sub>4</sub> <sup>+2</sup> | 873.4425               | y <sub>9</sub>                                  | 1352.6206 | y <sub>13</sub>                                 |
| 297.167                | b <sub>3</sub> -H <sub>3</sub> PO <sub>4</sub>               | 470.2540 <sup>+2</sup> | b <sub>10</sub> -H <sub>3</sub> PO <sub>4</sub> <sup>+2</sup> | 627.8255 <sup>+2</sup> | y <sub>13</sub> -H <sub>3</sub> PO <sub>4</sub> <sup>+2</sup> | 895.4033               | b <sub>8</sub>                                  | 1410.7448 | MH-H <sub>3</sub> PO <sub>4</sub>               |
| 305.1770 <sup>+2</sup> | b <sub>6</sub> -H <sub>3</sub> PO <sub>4</sub> <sup>+2</sup> | 472.2514               | y <sub>4</sub>                                                | 632.2901 <sup>+2</sup> | b <sub>12</sub> <sup>+2</sup>                                 | 939.5007               | b <sub>10</sub> -H <sub>3</sub> PO <sub>4</sub> | 1508.7217 | MH                                              |

MS/MS Fragmentation of HFPLDLRTsmDGK  
 Found in IPI00007722, Adenosine monophosphate deaminase 2

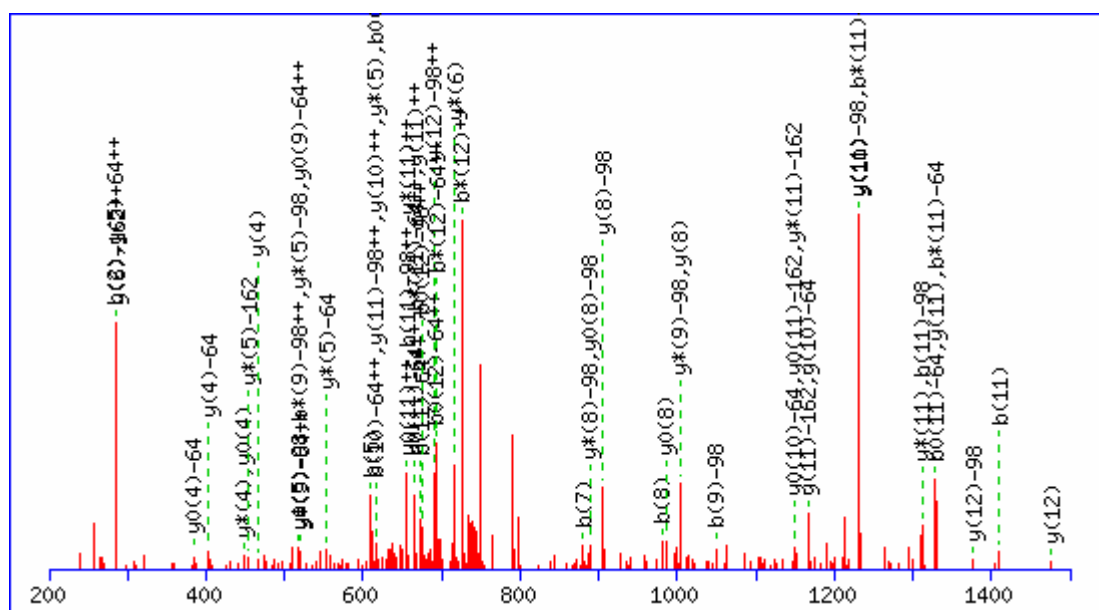

|                        |                                                              |                        |                                                              |                        |                                                               |                        |                                                 |           |                                                 |
|------------------------|--------------------------------------------------------------|------------------------|--------------------------------------------------------------|------------------------|---------------------------------------------------------------|------------------------|-------------------------------------------------|-----------|-------------------------------------------------|
| 74.0600 <sup>+2</sup>  | y <sub>1</sub> <sup>+2</sup>                                 | 362.1949 <sup>+2</sup> | b <sub>6</sub> <sup>+2</sup>                                 | 567.2846 <sup>+2</sup> | y <sub>10</sub> -H <sub>3</sub> PO <sub>4</sub> <sup>+2</sup> | 733.8103 <sup>+2</sup> | b <sub>12</sub> <sup>+2</sup>                   | 1147.5296 | b <sub>9</sub>                                  |
| 102.5708 <sup>+2</sup> | y <sub>2</sub> <sup>+2</sup>                                 | 367.6250 <sup>+2</sup> | y <sub>6</sub> <sup>+2</sup>                                 | 574.2684 <sup>+2</sup> | b <sub>9</sub> <sup>+2</sup>                                  | 734.2426               | y <sub>6</sub>                                  | 1196.5881 | b <sub>10</sub> -H <sub>3</sub> PO <sub>4</sub> |
| 143.0709 <sup>+2</sup> | b <sub>2</sub> <sup>+2</sup>                                 | 382.1874               | b <sub>3</sub>                                               | 598.7977 <sup>+2</sup> | b <sub>10</sub> -H <sub>3</sub> PO <sub>4</sub> <sup>+2</sup> | 738.3336 <sup>+2</sup> | y <sub>12</sub> <sup>+2</sup>                   | 1230.6147 | y <sub>11</sub> -H <sub>3</sub> PO <sub>4</sub> |
| 147.1128               | y <sub>1</sub>                                               | 396.6871 <sup>+2</sup> | y <sub>7</sub> -H <sub>3</sub> PO <sub>4</sub> <sup>+2</sup> | 610.2984               | b <sub>5</sub>                                                | 757.8747 <sup>+2</sup> | MH-H <sub>3</sub> PO <sub>4</sub> <sup>+2</sup> | 1231.5388 | y <sub>10</sub>                                 |
| 160.0842 <sup>+2</sup> | y <sub>3</sub> <sup>+2</sup>                                 | 440.2454 <sup>+2</sup> | b <sub>7</sub> <sup>+2</sup>                                 | 615.8110 <sup>+2</sup> | y <sub>11</sub> -H <sub>3</sub> PO <sub>4</sub> <sup>+2</sup> | 792.3669               | y <sub>7</sub> -H <sub>3</sub> PO <sub>4</sub>  | 1294.565  | b <sub>10</sub>                                 |
| 191.5973 <sup>+2</sup> | b <sub>3</sub> <sup>+2</sup>                                 | 445.6755 <sup>+2</sup> | y <sub>7</sub> <sup>+2</sup>                                 | 616.2731 <sup>+2</sup> | y <sub>10</sub> <sup>+2</sup>                                 | 806.8631 <sup>+2</sup> | MH <sup>+2</sup>                                | 1311.615  | b <sub>11</sub> -H <sub>3</sub> PO <sub>4</sub> |
| 204.1343               | y <sub>2</sub>                                               | 453.2291 <sup>+2</sup> | y <sub>8</sub> -H <sub>3</sub> PO <sub>4</sub> <sup>+2</sup> | 633.195                | y <sub>5</sub>                                                | 879.4835               | b <sub>7</sub>                                  | 1328.5916 | y <sub>11</sub>                                 |
| 233.6019 <sup>+2</sup> | y <sub>4</sub> <sup>+2</sup>                                 | 466.1966               | y <sub>4</sub>                                               | 636.2658               | y <sub>6</sub> -H <sub>3</sub> PO <sub>4</sub>                | 890.3438               | y <sub>7</sub>                                  | 1368.6365 | b <sub>12</sub> -H <sub>3</sub> PO <sub>4</sub> |
| 248.1394 <sup>+2</sup> | b <sub>4</sub> <sup>+2</sup>                                 | 490.7693 <sup>+2</sup> | b <sub>8</sub> <sup>+2</sup>                                 | 647.7861 <sup>+2</sup> | b <sub>10</sub> <sup>+2</sup>                                 | 905.4509               | y <sub>8</sub> -H <sub>3</sub> PO <sub>4</sub>  | 1377.6831 | y <sub>12</sub> -H <sub>3</sub> PO <sub>4</sub> |
| 268.1127 <sup>+2</sup> | y <sub>5</sub> -H <sub>3</sub> PO <sub>4</sub> <sup>+2</sup> | 495.2714               | b <sub>4</sub>                                               | 656.3112 <sup>+2</sup> | b <sub>11</sub> -H <sub>3</sub> PO <sub>4</sub> <sup>+2</sup> | 980.5312               | b <sub>8</sub>                                  | 1409.5919 | b <sub>11</sub>                                 |
| 285.1346               | b <sub>2</sub>                                               | 502.2175 <sup>+2</sup> | y <sub>8</sub> <sup>+2</sup>                                 | 664.7994 <sup>+2</sup> | y <sub>11</sub> <sup>+2</sup>                                 | 1003.4278              | y <sub>8</sub>                                  | 1466.6134 | b <sub>12</sub>                                 |
| 305.6528 <sup>+2</sup> | b <sub>5</sub> <sup>+2</sup>                                 | 510.7426 <sup>+2</sup> | y <sub>9</sub> -H <sub>3</sub> PO <sub>4</sub> <sup>+2</sup> | 684.8219 <sup>+2</sup> | b <sub>12</sub> -H <sub>3</sub> PO <sub>4</sub> <sup>+2</sup> | 1020.4779              | y <sub>9</sub> -H <sub>3</sub> PO <sub>4</sub>  | 1475.66   | y <sub>12</sub>                                 |
| 317.1011 <sup>+2</sup> | y <sub>5</sub> <sup>+2</sup>                                 | 525.2800 <sup>+2</sup> | b <sub>9</sub> -H <sub>3</sub> PO <sub>4</sub> <sup>+2</sup> | 689.3452 <sup>+2</sup> | y <sub>12</sub> -H <sub>3</sub> PO <sub>4</sub> <sup>+2</sup> | 1049.5527              | b <sub>9</sub> -H <sub>3</sub> PO <sub>4</sub>  | 1514.742  | MH-H <sub>3</sub> PO <sub>4</sub>               |
| 318.6365 <sup>+2</sup> | y <sub>6</sub> -H <sub>3</sub> PO <sub>4</sub> <sup>+2</sup> | 535.2181               | y <sub>5</sub> -H <sub>3</sub> PO <sub>4</sub>               | 705.2996 <sup>+2</sup> | b <sub>11</sub> <sup>+2</sup>                                 | 1118.4548              | y <sub>9</sub>                                  | 1612.7189 | MH                                              |
| 319.1612               | y <sub>3</sub>                                               | 559.7310 <sup>+2</sup> | y <sub>9</sub> <sup>+2</sup>                                 | 723.3824               | b <sub>6</sub>                                                | 1133.5619              | y <sub>10</sub> -H <sub>3</sub> PO <sub>4</sub> |           |                                                 |

MS/MS Fragmentation of QIsQDVKLEPDILLR  
 Found in IPI00007722, Adenosine monophosphate deaminase 2

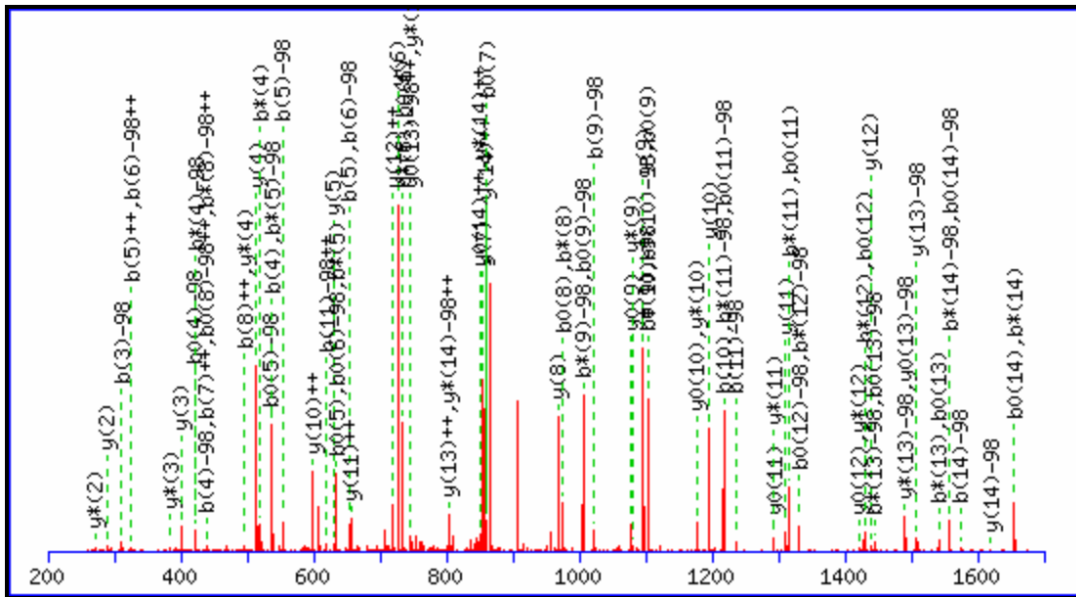

|                        |                                                              |                        |                                                               |                        |                                                               |                        |                                                 |           |                                                 |
|------------------------|--------------------------------------------------------------|------------------------|---------------------------------------------------------------|------------------------|---------------------------------------------------------------|------------------------|-------------------------------------------------|-----------|-------------------------------------------------|
| 88.0631 <sup>+2</sup>  | y <sub>1</sub> <sup>+2</sup>                                 | 447.7558 <sup>+2</sup> | b <sub>8</sub> -H <sub>3</sub> PO <sub>4</sub> <sup>+2</sup>  | 655.8876 <sup>+2</sup> | y <sub>11</sub> <sup>+2</sup>                                 | 859.9581 <sup>+2</sup> | y <sub>14</sub> <sup>+2</sup>                   | 1348.7107 | b <sub>12</sub> -H <sub>3</sub> PO <sub>4</sub> |
| 144.6051 <sup>+2</sup> | y <sub>2</sub> <sup>+2</sup>                                 | 484.7924 <sup>+2</sup> | y <sub>8</sub> <sup>+2</sup>                                  | 667.3054 <sup>+2</sup> | b <sub>11</sub> <sup>+2</sup>                                 | 874.9989 <sup>+2</sup> | MH-H <sub>3</sub> PO <sub>4</sub> <sup>+2</sup> | 1438.8264 | y <sub>12</sub>                                 |
| 175.119                | y <sub>1</sub>                                               | 496.7443 <sup>+2</sup> | b <sub>8</sub> <sup>+2</sup>                                  | 674.8590 <sup>+2</sup> | b <sub>12</sub> -H <sub>3</sub> PO <sub>4</sub> <sup>+2</sup> | 879.3972               | b <sub>7</sub>                                  | 1446.6876 | b <sub>12</sub>                                 |
| 201.1472 <sup>+2</sup> | y <sub>3</sub> <sup>+2</sup>                                 | 512.2771 <sup>+2</sup> | b <sub>9</sub> -H <sub>3</sub> PO <sub>4</sub> <sup>+2</sup>  | 719.9168 <sup>+2</sup> | y <sub>12</sub> <sup>+2</sup>                                 | 894.5043               | b <sub>8</sub> -H <sub>3</sub> PO <sub>4</sub>  | 1461.7948 | b <sub>13</sub> -H <sub>3</sub> PO <sub>4</sub> |
| 242.1499               | b <sub>2</sub>                                               | 514.3711               | y <sub>4</sub>                                                | 723.8474 <sup>+2</sup> | b <sub>12</sub> <sup>+2</sup>                                 | 923.9873 <sup>+2</sup> | MH <sup>+2</sup>                                | 1507.8479 | y <sub>13</sub> -H <sub>3</sub> PO <sub>4</sub> |
| 257.6892 <sup>+2</sup> | y <sub>4</sub> <sup>+2</sup>                                 | 537.2069               | b <sub>4</sub>                                                | 726.4509               | y <sub>6</sub>                                                | 968.5775               | y <sub>8</sub>                                  | 1559.7717 | b <sub>13</sub>                                 |
| 288.203                | y <sub>2</sub>                                               | 548.8399 <sup>+2</sup> | y <sub>9</sub> <sup>+2</sup>                                  | 731.4010 <sup>+2</sup> | b <sub>13</sub> -H <sub>3</sub> PO <sub>4</sub> <sup>+2</sup> | 992.4812               | b <sub>8</sub>                                  | 1574.8788 | b <sub>14</sub> -H <sub>3</sub> PO <sub>4</sub> |
| 311.1714               | b <sub>3</sub> -H <sub>3</sub> PO <sub>4</sub>               | 554.2569               | b <sub>5</sub> -H <sub>3</sub> PO <sub>4</sub>                | 751.3022               | b <sub>6</sub>                                                | 1023.5469              | b <sub>9</sub> -H <sub>3</sub> PO <sub>4</sub>  | 1605.8248 | y <sub>13</sub>                                 |
| 315.2027 <sup>+2</sup> | y <sub>5</sub> <sup>+2</sup>                                 | 560.8035 <sup>+2</sup> | b <sub>10</sub> -H <sub>3</sub> PO <sub>4</sub> <sup>+2</sup> | 754.4276 <sup>+2</sup> | y <sub>13</sub> -H <sub>3</sub> PO <sub>4</sub> <sup>+2</sup> | 1096.6725              | y <sub>9</sub>                                  | 1620.9319 | y <sub>14</sub> -H <sub>3</sub> PO <sub>4</sub> |
| 363.7291 <sup>+2</sup> | y <sub>6</sub> <sup>+2</sup>                                 | 561.2656 <sup>+2</sup> | b <sub>9</sub> <sup>+2</sup>                                  | 780.3895 <sup>+2</sup> | b <sub>13</sub> <sup>+2</sup>                                 | 1120.5997              | b <sub>10</sub> -H <sub>3</sub> PO <sub>4</sub> | 1672.8557 | b <sub>14</sub>                                 |
| 391.2138 <sup>+2</sup> | b <sub>7</sub> -H <sub>3</sub> PO <sub>4</sub> <sup>+2</sup> | 598.3741 <sup>+2</sup> | y <sub>10</sub> <sup>+2</sup>                                 | 781.4203               | b <sub>7</sub> -H <sub>3</sub> PO <sub>4</sub>                | 1121.5238              | b <sub>9</sub>                                  | 1718.9088 | y <sub>14</sub>                                 |
| 401.2871               | y <sub>3</sub>                                               | 609.7919 <sup>+2</sup> | b <sub>10</sub> <sup>+2</sup>                                 | 787.9431 <sup>+2</sup> | b <sub>14</sub> -H <sub>3</sub> PO <sub>4</sub> <sup>+2</sup> | 1195.7409              | y <sub>10</sub>                                 | 1748.9905 | MH-H <sub>3</sub> PO <sub>4</sub>               |
| 409.1483               | b <sub>3</sub>                                               | 618.3170 <sup>+2</sup> | b <sub>11</sub> -H <sub>3</sub> PO <sub>4</sub> <sup>+2</sup> | 803.4160 <sup>+2</sup> | y <sub>13</sub> <sup>+2</sup>                                 | 1218.5766              | b <sub>10</sub>                                 | 1846.9674 | MH                                              |
| 428.2504 <sup>+2</sup> | y <sub>7</sub> <sup>+2</sup>                                 | 629.3981               | y <sub>5</sub>                                                | 810.9696 <sup>+2</sup> | y <sub>14</sub> -H <sub>3</sub> PO <sub>4</sub> <sup>+2</sup> | 1235.6266              | b <sub>11</sub> -H <sub>3</sub> PO <sub>4</sub> |           |                                                 |
| 439.23                 | b <sub>4</sub> -H <sub>3</sub> PO <sub>4</sub>               | 652.2338               | b <sub>5</sub>                                                | 836.9315 <sup>+2</sup> | b <sub>14</sub> <sup>+2</sup>                                 | 1310.7678              | y <sub>11</sub>                                 |           |                                                 |
| 440.2022 <sup>+2</sup> | b <sub>7</sub> <sup>+2</sup>                                 | 653.3253               | b <sub>6</sub> -H <sub>3</sub> PO <sub>4</sub>                | 855.4934               | y <sub>7</sub>                                                | 1333.6035              | b <sub>11</sub>                                 |           |                                                 |

MS/MS Fragmentation of SLsSPTVTLsAPLEGAK  
 Found in IPI00023287, Isoform 4 of E3 ubiquitin-protein ligase NEDD4-like protein

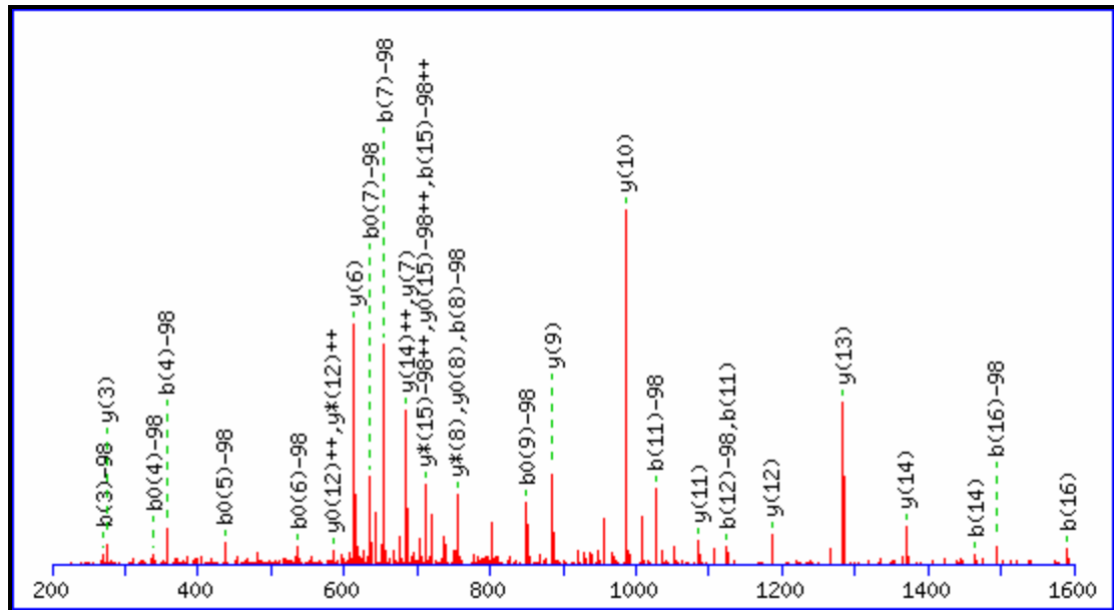

|                        |                                                |                        |                                                |                        |                                                               |           |                                                 |           |                                                 |
|------------------------|------------------------------------------------|------------------------|------------------------------------------------|------------------------|---------------------------------------------------------------|-----------|-------------------------------------------------|-----------|-------------------------------------------------|
| 74.0600 <sup>+2</sup>  | y <sub>1</sub> <sup>+2</sup>                   | 386.7136 <sup>+2</sup> | y <sub>8</sub> <sup>+2</sup>                   | 654.3457               | b <sub>7</sub> -H <sub>3</sub> PO <sub>4</sub>                | 885.504   | y <sub>9</sub>                                  | 1365.726  | b <sub>14</sub> -H <sub>3</sub> PO <sub>4</sub> |
| 109.5786 <sup>+2</sup> | y <sub>2</sub> <sup>+2</sup>                   | 404.214                | y <sub>4</sub>                                 | 685.3879               | y <sub>7</sub>                                                | 955.5095  | b <sub>10</sub> -H <sub>3</sub> PO <sub>4</sub> | 1370.7526 | y <sub>14</sub>                                 |
| 138.0893 <sup>+2</sup> | y <sub>3</sub> <sup>+2</sup>                   | 443.2556 <sup>+2</sup> | y <sub>9</sub> <sup>+2</sup>                   | 685.8799 <sup>+2</sup> | y <sub>14</sub> <sup>+2</sup>                                 | 966.4544  | b <sub>9</sub>                                  | 1422.7475 | b <sub>15</sub> -H <sub>3</sub> PO <sub>4</sub> |
| 147.1128               | y <sub>1</sub>                                 | 454.2296               | b <sub>5</sub> -H <sub>3</sub> PO <sub>4</sub> | 720.3907 <sup>+2</sup> | y <sub>15</sub> -H <sub>3</sub> PO <sub>4</sub> <sup>+2</sup> | 986.5517  | y <sub>10</sub>                                 | 1439.774  | y <sub>15</sub> -H <sub>3</sub> PO <sub>4</sub> |
| 201.1234               | b <sub>2</sub>                                 | 455.1538               | b <sub>4</sub>                                 | 752.3226               | b <sub>7</sub>                                                | 1026.5466 | b <sub>11</sub> -H <sub>3</sub> PO <sub>4</sub> | 1463.7029 | b <sub>14</sub>                                 |
| 202.6106 <sup>+2</sup> | y <sub>4</sub> <sup>+2</sup>                   | 493.7795 <sup>+2</sup> | y <sub>10</sub> <sup>+2</sup>                  | 755.3934               | b <sub>8</sub> -H <sub>3</sub> PO <sub>4</sub>                | 1053.4864 | b <sub>10</sub>                                 | 1493.7846 | b <sub>16</sub> -H <sub>3</sub> PO <sub>4</sub> |
| 218.1499               | y <sub>2</sub>                                 | 517.298                | y <sub>5</sub>                                 | 769.3791 <sup>+2</sup> | y <sub>15</sub> <sup>+2</sup>                                 | 1085.6201 | y <sub>11</sub>                                 | 1520.7244 | b <sub>15</sub>                                 |
| 259.1527 <sup>+2</sup> | y <sub>5</sub> <sup>+2</sup>                   | 543.3137 <sup>+2</sup> | y <sub>11</sub> <sup>+2</sup>                  | 772.4199               | y <sub>8</sub>                                                | 1123.5994 | b <sub>12</sub> -H <sub>3</sub> PO <sub>4</sub> | 1537.7509 | y <sub>15</sub>                                 |
| 270.1448               | b <sub>3</sub> -H <sub>3</sub> PO <sub>4</sub> | 552.2065               | b <sub>5</sub>                                 | 776.9327 <sup>+2</sup> | y <sub>16</sub> -H <sub>3</sub> PO <sub>4</sub> <sup>+2</sup> | 1124.5235 | b <sub>11</sub>                                 | 1552.8581 | y <sub>16</sub> -H <sub>3</sub> PO <sub>4</sub> |
| 275.1714               | y <sub>3</sub>                                 | 555.2773               | b <sub>6</sub> -H <sub>3</sub> PO <sub>4</sub> | 820.4487 <sup>+2</sup> | MH-H <sub>3</sub> PO <sub>4</sub> <sup>+2</sup>               | 1186.6678 | y <sub>12</sub>                                 | 1591.7615 | b <sub>16</sub>                                 |
| 307.6790 <sup>+2</sup> | y <sub>6</sub> <sup>+2</sup>                   | 593.8375 <sup>+2</sup> | y <sub>12</sub> <sup>+2</sup>                  | 825.9211 <sup>+2</sup> | y <sub>16</sub> <sup>+2</sup>                                 | 1221.5763 | b <sub>12</sub>                                 | 1639.8901 | MH-H <sub>3</sub> PO <sub>4</sub>               |
| 343.1976 <sup>+2</sup> | y <sub>7</sub> <sup>+2</sup>                   | 614.3508               | y <sub>6</sub>                                 | 853.3703               | b <sub>8</sub>                                                | 1236.6834 | b <sub>13</sub> -H <sub>3</sub> PO <sub>4</sub> | 1650.835  | y <sub>16</sub>                                 |
| 357.1769               | b <sub>4</sub> -H <sub>3</sub> PO <sub>4</sub> | 642.3639 <sup>+2</sup> | y <sub>13</sub> <sup>+2</sup>                  | 868.4775               | b <sub>9</sub> -H <sub>3</sub> PO <sub>4</sub>                | 1283.7205 | y <sub>13</sub>                                 | 1737.867  | MH                                              |
| 368.1217               | b <sub>3</sub>                                 | 653.2542               | b <sub>6</sub>                                 | 869.4371 <sup>+2</sup> | MH <sup>+2</sup>                                              | 1334.6603 | b <sub>13</sub>                                 |           |                                                 |

MS/MS Fragmentation of ALSAsHTDLAH  
 Found in IPI00472303, Isoform N of Kinesin light chain 1

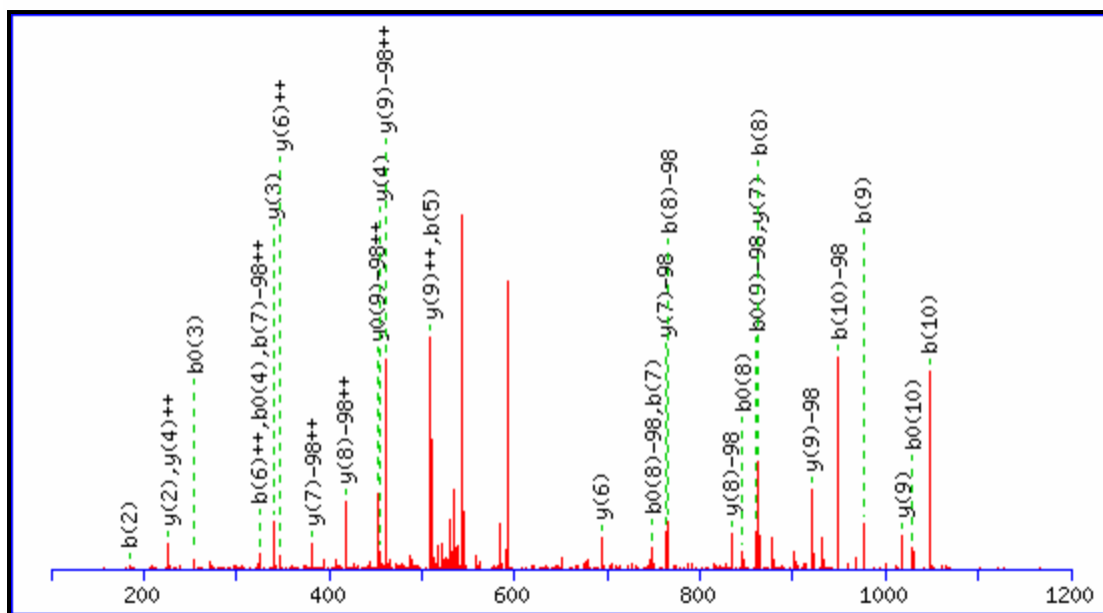

|                        |                                                              |                        |                                                              |                        |                                                               |                        |                                                |           |                                                 |
|------------------------|--------------------------------------------------------------|------------------------|--------------------------------------------------------------|------------------------|---------------------------------------------------------------|------------------------|------------------------------------------------|-----------|-------------------------------------------------|
| 78.5420 <sup>+2</sup>  | y <sub>1</sub> <sup>+2</sup>                                 | 340.1979               | y <sub>3</sub>                                               | 460.7147 <sup>+2</sup> | y <sub>9</sub> -H <sub>3</sub> PO <sub>4</sub> <sup>+2</sup>  | 601.7637 <sup>+2</sup> | MH <sup>+2</sup>                               | 931.3669  | y <sub>8</sub>                                  |
| 114.0606 <sup>+2</sup> | y <sub>2</sub> <sup>+2</sup>                                 | 343.1976               | b <sub>4</sub>                                               | 466.1871 <sup>+2</sup> | y <sub>8</sub> <sup>+2</sup>                                  | 647.2549               | b <sub>6</sub>                                 | 949.4738  | b <sub>10</sub> -H <sub>3</sub> PO <sub>4</sub> |
| 156.0768               | y <sub>1</sub>                                               | 347.1694 <sup>+2</sup> | y <sub>6</sub> <sup>+2</sup>                                 | 475.2405 <sup>+2</sup> | b <sub>10</sub> -H <sub>3</sub> PO <sub>4</sub> <sup>+2</sup> | 650.3257               | b <sub>7</sub> -H <sub>3</sub> PO <sub>4</sub> | 976.4136  | b <sub>9</sub>                                  |
| 170.6026 <sup>+2</sup> | y <sub>3</sub> <sup>+2</sup>                                 | 374.6549 <sup>+2</sup> | b <sub>7</sub> <sup>+2</sup>                                 | 488.7104 <sup>+2</sup> | b <sub>9</sub> <sup>+2</sup>                                  | 693.3315               | y <sub>6</sub>                                 | 1018.399  | y <sub>9</sub>                                  |
| 185.1285               | b <sub>2</sub>                                               | 381.6801 <sup>+2</sup> | y <sub>7</sub> -H <sub>3</sub> PO <sub>4</sub> <sup>+2</sup> | 509.7031 <sup>+2</sup> | y <sub>9</sub> <sup>+2</sup>                                  | 748.3025               | b <sub>7</sub>                                 | 1033.5061 | y <sub>10</sub> -H <sub>3</sub> PO <sub>4</sub> |
| 227.1139               | y <sub>2</sub>                                               | 383.1799 <sup>+2</sup> | b <sub>8</sub> -H <sub>3</sub> PO <sub>4</sub> <sup>+2</sup> | 510.196                | b <sub>5</sub>                                                | 762.3529               | y <sub>7</sub> -H <sub>3</sub> PO <sub>4</sub> | 1047.4507 | b <sub>10</sub>                                 |
| 228.1161 <sup>+2</sup> | y <sub>4</sub> <sup>+2</sup>                                 | 412.2191               | b <sub>5</sub> -H <sub>3</sub> PO <sub>4</sub>               | 517.2567 <sup>+2</sup> | y <sub>10</sub> -H <sub>3</sub> PO <sub>4</sub> <sup>+2</sup> | 765.3526               | b <sub>8</sub> -H <sub>3</sub> PO <sub>4</sub> | 1104.5432 | MH-H <sub>3</sub> PO <sub>4</sub>               |
| 272.1605               | b <sub>3</sub>                                               | 417.1987 <sup>+2</sup> | y <sub>8</sub> -H <sub>3</sub> PO <sub>4</sub> <sup>+2</sup> | 524.2290 <sup>+2</sup> | b <sub>10</sub> <sup>+2</sup>                                 | 833.39                 | y <sub>8</sub> -H <sub>3</sub> PO <sub>4</sub> | 1131.483  | y <sub>10</sub>                                 |
| 275.1426 <sup>+2</sup> | b <sub>6</sub> -H <sub>3</sub> PO <sub>4</sub> <sup>+2</sup> | 430.6685 <sup>+2</sup> | y <sub>7</sub> <sup>+2</sup>                                 | 549.278                | b <sub>6</sub> -H <sub>3</sub> PO <sub>4</sub>                | 860.3298               | y <sub>7</sub>                                 | 1202.5201 | MH                                              |
| 278.6399 <sup>+2</sup> | y <sub>5</sub> <sup>+2</sup>                                 | 432.1684 <sup>+2</sup> | b <sub>8</sub> <sup>+2</sup>                                 | 552.7753 <sup>+2</sup> | MH-H <sub>3</sub> PO <sub>4</sub> <sup>+2</sup>               | 863.3295               | b <sub>8</sub>                                 |           |                                                 |
| 324.1311 <sup>+2</sup> | b <sub>6</sub> <sup>+2</sup>                                 | 439.7220 <sup>+2</sup> | b <sub>9</sub> -H <sub>3</sub> PO <sub>4</sub> <sup>+2</sup> | 556.2726               | y <sub>5</sub>                                                | 878.4367               | b <sub>9</sub> -H <sub>3</sub> PO <sub>4</sub> |           |                                                 |
| 325.6665 <sup>+2</sup> | b <sub>7</sub> -H <sub>3</sub> PO <sub>4</sub> <sup>+2</sup> | 455.2249               | y <sub>4</sub>                                               | 566.2452 <sup>+2</sup> | y <sub>10</sub> <sup>+2</sup>                                 | 920.4221               | y <sub>9</sub> -H <sub>3</sub> PO <sub>4</sub> |           |                                                 |



MS/MS Fragmentation of A(SS)LNVLNVGGK  
 Found in IPI00472303, Isoform N of Kinesin light chain 1

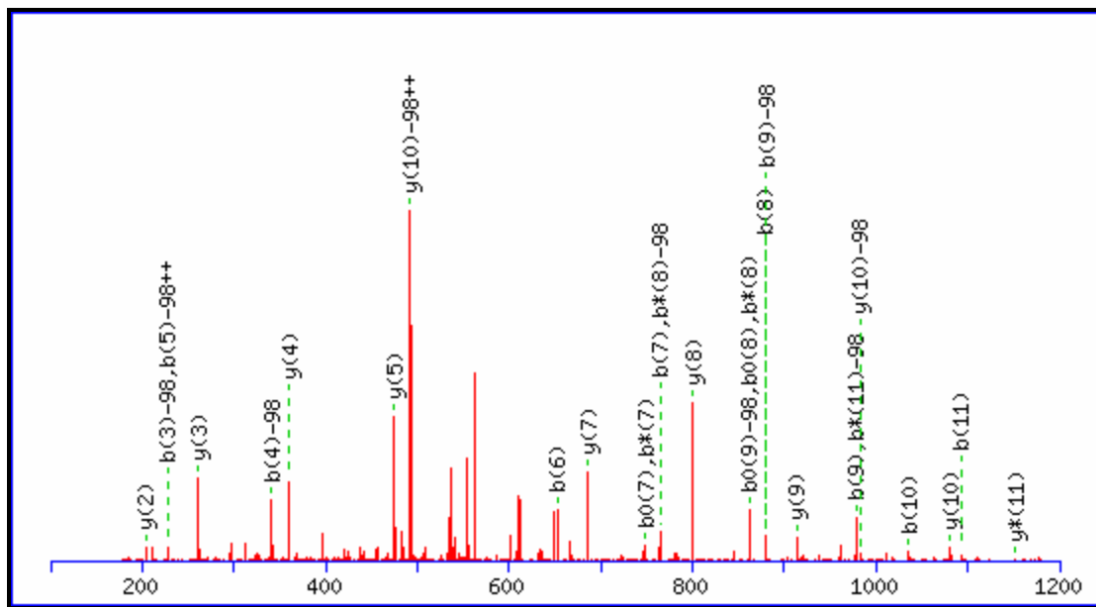

|                        |                                                |                        |                                                |                        |                                                               |          |                                                 |           |                                                 |
|------------------------|------------------------------------------------|------------------------|------------------------------------------------|------------------------|---------------------------------------------------------------|----------|-------------------------------------------------|-----------|-------------------------------------------------|
| 74.0600 <sup>+2</sup>  | y <sub>1</sub> <sup>+2</sup>                   | 294.1792 <sup>+2</sup> | y <sub>6</sub> <sup>+2</sup>                   | 491.7876 <sup>+2</sup> | y <sub>10</sub> -H <sub>3</sub> PO <sub>4</sub> <sup>+2</sup> | 667.3774 | b <sub>7</sub> -H <sub>3</sub> PO <sub>4</sub>  | 982.568   | y <sub>10</sub> -H <sub>3</sub> PO <sub>4</sub> |
| 102.5708 <sup>+2</sup> | y <sub>2</sub> <sup>+2</sup>                   | 326.0748               | b <sub>3</sub>                                 | 535.3037 <sup>+2</sup> | y <sub>11</sub> -H <sub>3</sub> PO <sub>4</sub> <sup>+2</sup> | 686.4196 | y <sub>7</sub>                                  | 994.5316  | b <sub>11</sub> -H <sub>3</sub> PO <sub>4</sub> |
| 131.0815 <sup>+2</sup> | y <sub>3</sub> <sup>+2</sup>                   | 341.1819               | b <sub>4</sub> -H <sub>3</sub> PO <sub>4</sub> | 540.7761 <sup>+2</sup> | y <sub>10</sub> <sup>+2</sup>                                 | 765.3542 | b <sub>7</sub>                                  | 1035.4871 | b <sub>10</sub>                                 |
| 147.1128               | y <sub>1</sub>                                 | 343.7134 <sup>+2</sup> | y <sub>7</sub> <sup>+2</sup>                   | 553.2018               | b <sub>5</sub>                                                | 781.4203 | b <sub>8</sub> -H <sub>3</sub> PO <sub>4</sub>  | 1069.6    | y <sub>11</sub> -H <sub>3</sub> PO <sub>4</sub> |
| 159.0764               | b <sub>2</sub>                                 | 360.2241               | y <sub>4</sub>                                 | 554.2933               | b <sub>6</sub> -H <sub>3</sub> PO <sub>4</sub>                | 800.4625 | y <sub>8</sub>                                  | 1080.5449 | y <sub>10</sub>                                 |
| 180.6157 <sup>+2</sup> | y <sub>4</sub> <sup>+2</sup>                   | 400.7349 <sup>+2</sup> | y <sub>8</sub> <sup>+2</sup>                   | 570.8222 <sup>+2</sup> | MH-H <sub>3</sub> PO <sub>4</sub> <sup>+2</sup>               | 879.3972 | b <sub>8</sub>                                  | 1092.5085 | b <sub>11</sub>                                 |
| 204.1343               | y <sub>2</sub>                                 | 439.1588               | b <sub>4</sub>                                 | 584.2921 <sup>+2</sup> | y <sub>11</sub> <sup>+2</sup>                                 | 880.4887 | b <sub>9</sub> -H <sub>3</sub> PO <sub>4</sub>  | 1140.6371 | MH-H <sub>3</sub> PO <sub>4</sub>               |
| 228.0979               | b <sub>3</sub> -H <sub>3</sub> PO <sub>4</sub> | 455.2249               | b <sub>5</sub> -H <sub>3</sub> PO <sub>4</sub> | 587.3511               | y <sub>6</sub>                                                | 913.5465 | y <sub>9</sub>                                  | 1167.5769 | y <sub>11</sub>                                 |
| 237.6372 <sup>+2</sup> | y <sub>5</sub> <sup>+2</sup>                   | 457.2769 <sup>+2</sup> | y <sub>9</sub> <sup>+2</sup>                   | 619.8107 <sup>+2</sup> | MH <sup>+2</sup>                                              | 937.5102 | b <sub>10</sub> -H <sub>3</sub> PO <sub>4</sub> | 1238.614  | MH                                              |
| 261.1557               | y <sub>3</sub>                                 | 474.2671               | y <sub>5</sub>                                 | 652.2702               | b <sub>6</sub>                                                | 978.4656 | b <sub>9</sub>                                  |           |                                                 |

MS/MS Fragmentation of RA(SS)LNVLNVGGK  
 Found in IPI00472303, Isoform N of Kinesin light chain 1

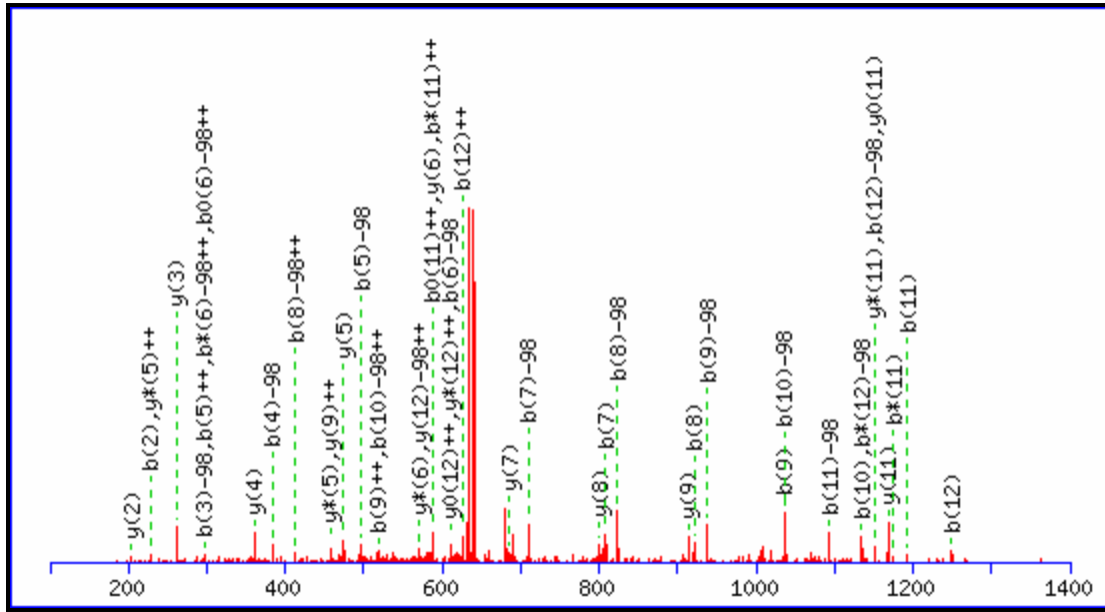

|                        |                                                              |                        |                                                              |                        |                                                               |                        |                                                 |           |                                                 |
|------------------------|--------------------------------------------------------------|------------------------|--------------------------------------------------------------|------------------------|---------------------------------------------------------------|------------------------|-------------------------------------------------|-----------|-------------------------------------------------|
| 74.0600 <sup>+2</sup>  | y <sub>1</sub> <sup>+2</sup>                                 | 294.1792 <sup>+2</sup> | y <sub>6</sub> <sup>+2</sup>                                 | 469.2643 <sup>+2</sup> | b <sub>9</sub> -H <sub>3</sub> PO <sub>4</sub> <sup>+2</sup>  | 596.2977 <sup>+2</sup> | b <sub>11</sub> <sup>+2</sup>                   | 1000.5786 | y <sub>10</sub>                                 |
| 102.5708 <sup>+2</sup> | y <sub>2</sub> <sup>+2</sup>                                 | 297.167                | b <sub>3</sub> -H <sub>3</sub> PO <sub>4</sub>               | 474.2671               | y <sub>5</sub>                                                | 611.326                | b <sub>6</sub> -H <sub>3</sub> PO <sub>4</sub>  | 1035.4983 | b <sub>9</sub>                                  |
| 114.5764 <sup>+2</sup> | b <sub>2</sub> <sup>+2</sup>                                 | 298.1336 <sup>+2</sup> | b <sub>5</sub> <sup>+2</sup>                                 | 482.1759               | b <sub>4</sub>                                                | 619.8107 <sup>+2</sup> | y <sub>12</sub> <sup>+2</sup>                   | 1036.5898 | b <sub>10</sub> -H <sub>3</sub> PO <sub>4</sub> |
| 131.0815 <sup>+2</sup> | y <sub>3</sub> <sup>+2</sup>                                 | 306.1666 <sup>+2</sup> | b <sub>6</sub> -H <sub>3</sub> PO <sub>4</sub> <sup>+2</sup> | 497.2831               | b <sub>5</sub> -H <sub>3</sub> PO <sub>4</sub>                | 624.8085 <sup>+2</sup> | b <sub>12</sub> <sup>+2</sup>                   | 1069.6    | y <sub>11</sub> -H <sub>3</sub> PO <sub>4</sub> |
| 147.1128               | y <sub>1</sub>                                               | 343.7134 <sup>+2</sup> | y <sub>7</sub> <sup>+2</sup>                                 | 500.7929 <sup>+2</sup> | y <sub>10</sub> <sup>+2</sup>                                 | 648.8728 <sup>+2</sup> | MH-H <sub>3</sub> PO <sub>4</sub> <sup>+2</sup> | 1093.6113 | b <sub>11</sub> -H <sub>3</sub> PO <sub>4</sub> |
| 149.0871 <sup>+2</sup> | b <sub>3</sub> -H <sub>3</sub> PO <sub>4</sub> <sup>+2</sup> | 355.1551 <sup>+2</sup> | b <sub>6</sub> <sup>+2</sup>                                 | 518.2528 <sup>+2</sup> | b <sub>9</sub> <sup>+2</sup>                                  | 686.4196               | y <sub>7</sub>                                  | 1134.5667 | b <sub>10</sub>                                 |
| 180.6157 <sup>+2</sup> | y <sub>4</sub> <sup>+2</sup>                                 | 355.7008 <sup>+2</sup> | b <sub>7</sub> -H <sub>3</sub> PO <sub>4</sub> <sup>+2</sup> | 518.7985 <sup>+2</sup> | b <sub>10</sub> -H <sub>3</sub> PO <sub>4</sub> <sup>+2</sup> | 697.8612 <sup>+2</sup> | MH <sup>+2</sup>                                | 1140.6371 | y <sub>12</sub> -H <sub>3</sub> PO <sub>4</sub> |
| 192.6031 <sup>+2</sup> | b <sub>4</sub> -H <sub>3</sub> PO <sub>4</sub> <sup>+2</sup> | 360.2241               | y <sub>4</sub>                                               | 535.3037 <sup>+2</sup> | y <sub>11</sub> -H <sub>3</sub> PO <sub>4</sub> <sup>+2</sup> | 709.3029               | b <sub>6</sub>                                  | 1150.6327 | b <sub>12</sub> -H <sub>3</sub> PO <sub>4</sub> |
| 198.0756 <sup>+2</sup> | b <sub>3</sub> <sup>+2</sup>                                 | 384.199                | b <sub>4</sub> -H <sub>3</sub> PO <sub>4</sub>               | 547.3093 <sup>+2</sup> | b <sub>11</sub> -H <sub>3</sub> PO <sub>4</sub> <sup>+2</sup> | 710.3944               | b <sub>7</sub> -H <sub>3</sub> PO <sub>4</sub>  | 1167.5769 | y <sub>11</sub>                                 |
| 204.1343               | y <sub>2</sub>                                               | 395.1439               | b <sub>3</sub>                                               | 567.7870 <sup>+2</sup> | b <sub>10</sub> <sup>+2</sup>                                 | 800.4625               | y <sub>8</sub>                                  | 1191.5882 | b <sub>11</sub>                                 |
| 228.1455               | b <sub>2</sub>                                               | 400.7349 <sup>+2</sup> | y <sub>8</sub> <sup>+2</sup>                                 | 570.8222 <sup>+2</sup> | y <sub>12</sub> -H <sub>3</sub> PO <sub>4</sub> <sup>+2</sup> | 808.3713               | b <sub>7</sub>                                  | 1238.614  | y <sub>12</sub>                                 |
| 237.6372 <sup>+2</sup> | y <sub>5</sub> <sup>+2</sup>                                 | 404.6893 <sup>+2</sup> | b <sub>7</sub> <sup>+2</sup>                                 | 575.8200 <sup>+2</sup> | b <sub>12</sub> -H <sub>3</sub> PO <sub>4</sub> <sup>+2</sup> | 823.4785               | b <sub>8</sub> -H <sub>3</sub> PO <sub>4</sub>  | 1248.6096 | b <sub>12</sub>                                 |
| 241.5916 <sup>+2</sup> | b <sub>4</sub> <sup>+2</sup>                                 | 412.2429 <sup>+2</sup> | b <sub>8</sub> -H <sub>3</sub> PO <sub>4</sub> <sup>+2</sup> | 584.2921 <sup>+2</sup> | y <sub>11</sub> <sup>+2</sup>                                 | 913.5465               | y <sub>9</sub>                                  | 1296.7383 | MH-H <sub>3</sub> PO <sub>4</sub>               |
| 249.1452 <sup>+2</sup> | b <sub>5</sub> -H <sub>3</sub> PO <sub>4</sub> <sup>+2</sup> | 457.2769 <sup>+2</sup> | y <sub>9</sub> <sup>+2</sup>                                 | 587.3511               | y <sub>6</sub>                                                | 921.4554               | b <sub>8</sub>                                  | 1394.7152 | MH                                              |
| 261.1557               | y <sub>3</sub>                                               | 461.2313 <sup>+2</sup> | b <sub>8</sub> <sup>+2</sup>                                 | 595.26                 | b <sub>5</sub>                                                | 937.5214               | b <sub>9</sub> -H <sub>3</sub> PO <sub>4</sub>  |           |                                                 |

MS/MS Fragmentation of RNEsLTATDGLR  
 Found in IPI00400923, SH3 multiple domains 1

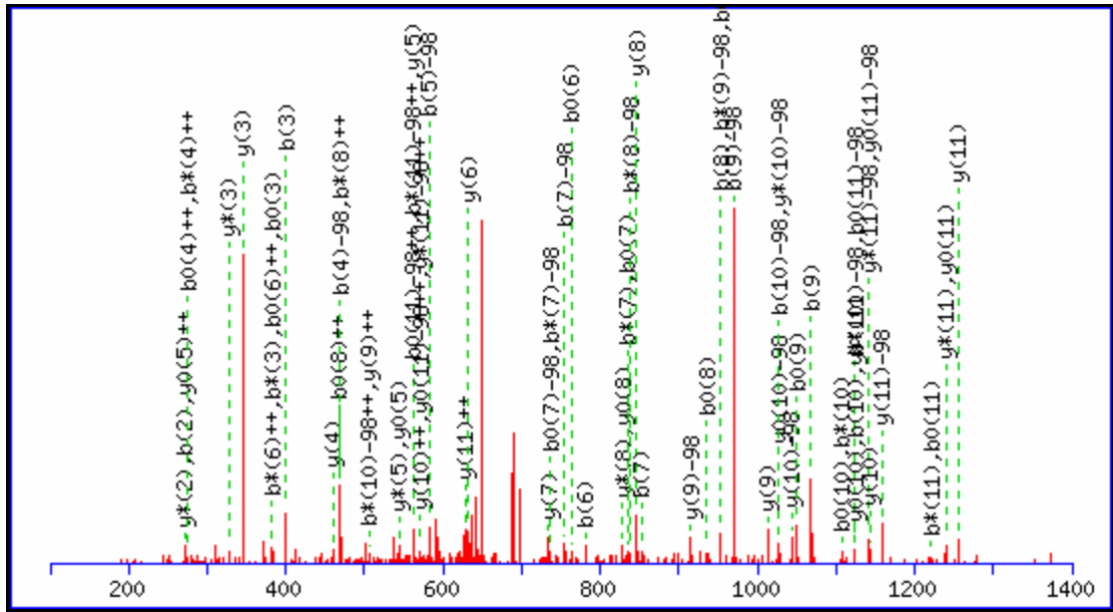

|                        |                                  |                        |                                  |                        |                                     |                        |                                 |           |                                |
|------------------------|----------------------------------|------------------------|----------------------------------|------------------------|-------------------------------------|------------------------|---------------------------------|-----------|--------------------------------|
| 88.0631 <sup>+2</sup>  | $y_1^{+2}$                       | 340.6418 <sup>+2</sup> | $b_5^{+2}$                       | 485.7331 <sup>+2</sup> | $b_9\text{-H}_3\text{PO}_4^{+2}$    | 632.3362               | $y_6$                           | 1013.4663 | $y_9$                          |
| 136.0793 <sup>+2</sup> | $b_2^{+2}$                       | 342.1772 <sup>+2</sup> | $b_6\text{-H}_3\text{PO}_4^{+2}$ | 507.2368 <sup>+2</sup> | $y_9^{+2}$                          | 657.8417 <sup>+2</sup> | $\text{MH-H}_3\text{PO}_4^{+2}$ | 1027.4803 | $b_{10}\text{-H}_3\text{PO}_4$ |
| 144.6051 <sup>+2</sup> | $y_2^{+2}$                       | 345.2245               | $y_3$                            | 514.2438 <sup>+2</sup> | $b_{10}\text{-H}_3\text{PO}_4^{+2}$ | 680.2763               | $b_5$                           | 1044.532  | $y_{10}\text{-H}_3\text{PO}_4$ |
| 173.1159 <sup>+2</sup> | $y_3^{+2}$                       | 367.1956 <sup>+2</sup> | $y_7^{+2}$                       | 522.7696 <sup>+2</sup> | $y_{10}\text{-H}_3\text{PO}_4^{+2}$ | 683.3471               | $b_6\text{-H}_3\text{PO}_4$     | 1068.4357 | $b_9$                          |
| 175.119                | $y_1$                            | 377.6958 <sup>+2</sup> | $b_7\text{-H}_3\text{PO}_4^{+2}$ | 534.7215 <sup>+2</sup> | $b_9^{+2}$                          | 706.8301 <sup>+2</sup> | $\text{MH}^{+2}$                | 1125.4572 | $b_{10}$                       |
| 200.6006 <sup>+2</sup> | $b_3^{+2}$                       | 391.1656 <sup>+2</sup> | $b_6^{+2}$                       | 561.2991               | $y_5$                               | 733.3839               | $y_7$                           | 1140.5644 | $b_{11}\text{-H}_3\text{PO}_4$ |
| 230.6293 <sup>+2</sup> | $y_4^{+2}$                       | 400.1939               | $b_3$                            | 563.2322 <sup>+2</sup> | $b_{10}^{+2}$                       | 754.3842               | $b_7\text{-H}_3\text{PO}_4$     | 1142.5089 | $y_{10}$                       |
| 235.1113 <sup>+2</sup> | $b_4\text{-H}_3\text{PO}_4^{+2}$ | 423.7376 <sup>+2</sup> | $y_8^{+2}$                       | 567.1923               | $b_4$                               | 781.324                | $b_6$                           | 1158.5749 | $y_{11}\text{-H}_3\text{PO}_4$ |
| 271.1513               | $b_2$                            | 426.6842 <sup>+2</sup> | $b_7^{+2}$                       | 570.7858 <sup>+2</sup> | $b_{11}\text{-H}_3\text{PO}_4^{+2}$ | 846.468                | $y_8$                           | 1238.5413 | $b_{11}$                       |
| 281.1532 <sup>+2</sup> | $y_5^{+2}$                       | 428.2196 <sup>+2</sup> | $b_8\text{-H}_3\text{PO}_4^{+2}$ | 571.7581 <sup>+2</sup> | $y_{10}^{+2}$                       | 852.3611               | $b_7$                           | 1256.5518 | $y_{11}$                       |
| 284.0998 <sup>+2</sup> | $b_4^{+2}$                       | 458.2483 <sup>+2</sup> | $y_9\text{-H}_3\text{PO}_4^{+2}$ | 579.7911 <sup>+2</sup> | $y_{11}\text{-H}_3\text{PO}_4^{+2}$ | 855.4319               | $b_8\text{-H}_3\text{PO}_4$     | 1314.6761 | $\text{MH-H}_3\text{PO}_4$     |
| 288.203                | $y_2$                            | 460.2514               | $y_4$                            | 582.2994               | $b_5\text{-H}_3\text{PO}_4$         | 915.4894               | $y_9\text{-H}_3\text{PO}_4$     | 1412.6529 | $\text{MH}$                    |
| 291.6534 <sup>+2</sup> | $b_5\text{-H}_3\text{PO}_4^{+2}$ | 469.2154               | $b_4\text{-H}_3\text{PO}_4$      | 619.7743 <sup>+2</sup> | $b_{11}^{+2}$                       | 953.4088               | $b_8$                           |           |                                |
| 316.6717 <sup>+2</sup> | $y_6^{+2}$                       | 477.2080 <sup>+2</sup> | $b_8^{+2}$                       | 628.7796 <sup>+2</sup> | $y_{11}^{+2}$                       | 970.4588               | $b_9\text{-H}_3\text{PO}_4$     |           |                                |

MS/MS Fragmentation of AAsQGSDSPLPAQR  
 Found in IPI00400923, SH3 multiple domains 1

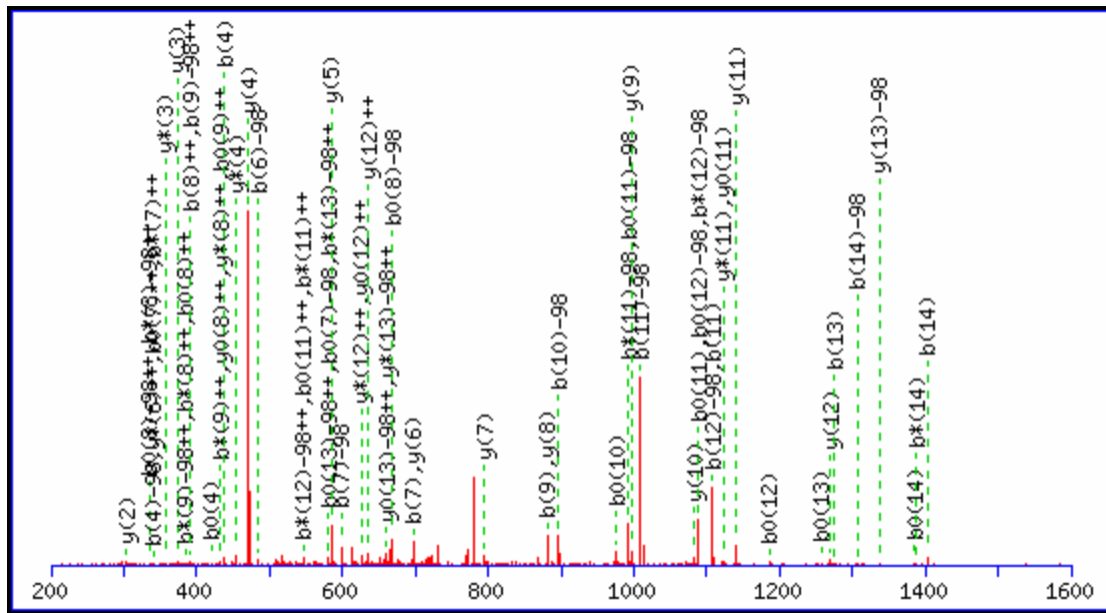

|                        |                                                |                        |                                                |                        |                                                               |           |                                                 |           |                                                 |
|------------------------|------------------------------------------------|------------------------|------------------------------------------------|------------------------|---------------------------------------------------------------|-----------|-------------------------------------------------|-----------|-------------------------------------------------|
| 88.0631 <sup>+2</sup>  | y <sub>1</sub> <sup>+2</sup>                   | 397.183                | b <sub>5</sub> -H <sub>3</sub> PO <sub>4</sub> | 634.8333 <sup>+2</sup> | y <sub>12</sub> <sup>+2</sup>                                 | 881.3037  | b <sub>9</sub>                                  | 1275.5617 | b <sub>13</sub>                                 |
| 143.0815               | b <sub>2</sub>                                 | 397.7478 <sup>+2</sup> | y <sub>7</sub> <sup>+2</sup>                   | 669.3440 <sup>+2</sup> | y <sub>13</sub> -H <sub>3</sub> PO <sub>4</sub> <sup>+2</sup> | 881.5203  | y <sub>8</sub>                                  | 1305.6434 | b <sub>14</sub> -H <sub>3</sub> PO <sub>4</sub> |
| 152.0924 <sup>+2</sup> | y <sub>2</sub> <sup>+2</sup>                   | 438.1384               | b <sub>4</sub>                                 | 686.274                | b <sub>8</sub> -H <sub>3</sub> PO <sub>4</sub>                | 896.4108  | b <sub>10</sub> -H <sub>3</sub> PO <sub>4</sub> | 1337.6808 | y <sub>13</sub> -H <sub>3</sub> PO <sub>4</sub> |
| 175.119                | y <sub>1</sub>                                 | 441.2638 <sup>+2</sup> | y <sub>8</sub> <sup>+2</sup>                   | 697.2189               | b <sub>7</sub>                                                | 994.3877  | b <sub>10</sub>                                 | 1403.6203 | b <sub>14</sub>                                 |
| 187.6110 <sup>+2</sup> | y <sub>3</sub> <sup>+2</sup>                   | 471.2674               | y <sub>4</sub>                                 | 697.4355               | y <sub>6</sub>                                                | 996.5473  | y <sub>9</sub>                                  | 1408.7179 | y <sub>14</sub> -H <sub>3</sub> PO <sub>4</sub> |
| 212.103                | b <sub>3</sub> -H <sub>3</sub> PO <sub>4</sub> | 484.215                | b <sub>6</sub> -H <sub>3</sub> PO <sub>4</sub> | 704.8626 <sup>+2</sup> | y <sub>14</sub> -H <sub>3</sub> PO <sub>4</sub> <sup>+2</sup> | 1009.4949 | b <sub>11</sub> -H <sub>3</sub> PO <sub>4</sub> | 1435.6577 | y <sub>13</sub>                                 |
| 236.1373 <sup>+2</sup> | y <sub>4</sub> <sup>+2</sup>                   | 495.1599               | b <sub>5</sub>                                 | 718.3325 <sup>+2</sup> | y <sub>13</sub> <sup>+2</sup>                                 | 1083.5793 | y <sub>10</sub>                                 | 1479.755  | MH-H <sub>3</sub> PO <sub>4</sub>               |
| 292.6794 <sup>+2</sup> | y <sub>5</sub> <sup>+2</sup>                   | 498.7773 <sup>+2</sup> | y <sub>9</sub> <sup>+2</sup>                   | 740.3812 <sup>+2</sup> | MH-H <sub>3</sub> PO <sub>4</sub> <sup>+2</sup>               | 1106.5477 | b <sub>12</sub> -H <sub>3</sub> PO <sub>4</sub> | 1506.6948 | y <sub>14</sub>                                 |
| 303.1775               | y <sub>2</sub>                                 | 542.2933 <sup>+2</sup> | y <sub>10</sub> <sup>+2</sup>                  | 753.8510 <sup>+2</sup> | y <sub>14</sub> <sup>+2</sup>                                 | 1107.4718 | b <sub>11</sub>                                 | 1577.7319 | MH                                              |
| 310.0799               | b <sub>3</sub>                                 | 570.8040 <sup>+2</sup> | y <sub>11</sub> <sup>+2</sup>                  | 783.3268               | b <sub>9</sub> -H <sub>3</sub> PO <sub>4</sub>                | 1140.6008 | y <sub>11</sub>                                 |           |                                                 |
| 340.1615               | b <sub>4</sub> -H <sub>3</sub> PO <sub>4</sub> | 582.1919               | b <sub>6</sub>                                 | 784.2509               | b <sub>8</sub>                                                | 1177.5848 | b <sub>13</sub> -H <sub>3</sub> PO <sub>4</sub> |           |                                                 |
| 349.2214 <sup>+2</sup> | y <sub>6</sub> <sup>+2</sup>                   | 584.3515               | y <sub>5</sub>                                 | 789.3696 <sup>+2</sup> | MH <sup>+2</sup>                                              | 1204.5246 | b <sub>12</sub>                                 |           |                                                 |
| 374.2146               | y <sub>3</sub>                                 | 599.242                | b <sub>7</sub> -H <sub>3</sub> PO <sub>4</sub> | 794.4883               | y <sub>7</sub>                                                | 1268.6593 | y <sub>12</sub>                                 |           |                                                 |

MS/MS Fragmentation of EAEEGPTGASESQDsMS/MS Fragmentation of EAEEGPTGASESQDsPR  
 Found in IPI00400923, SH3 multiple domains 1 PR  
 Found in IPI00400923, SH3 multiple domains 1

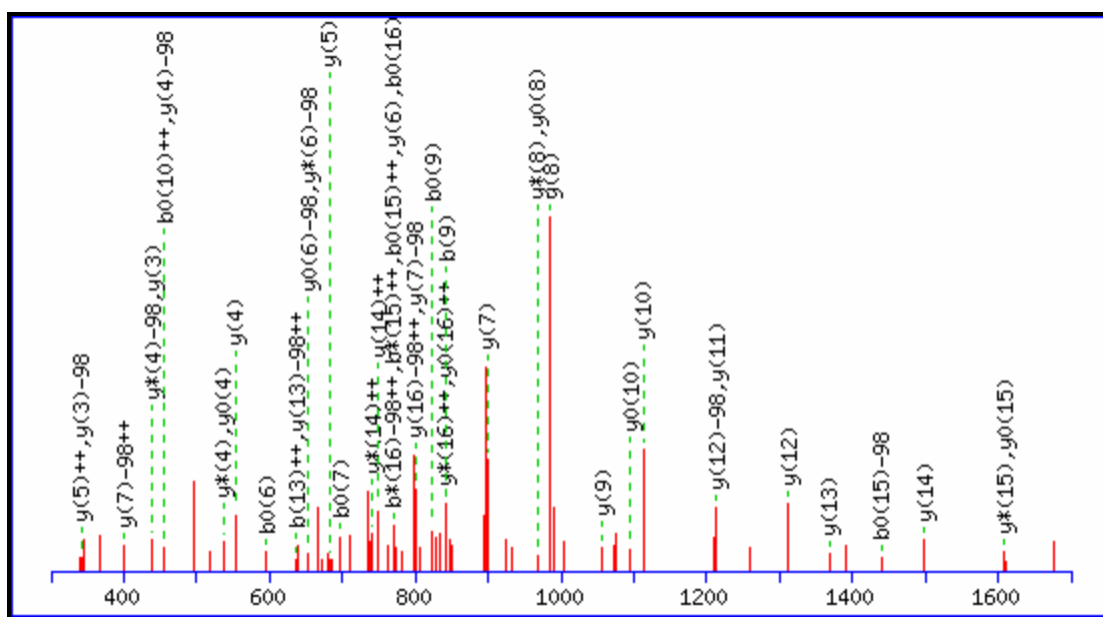

|                        |                                                              |                        |                                                               |                        |                                                               |                        |                                                 |           |                                                 |
|------------------------|--------------------------------------------------------------|------------------------|---------------------------------------------------------------|------------------------|---------------------------------------------------------------|------------------------|-------------------------------------------------|-----------|-------------------------------------------------|
| 88.0631 <sup>+2</sup>  | y <sub>1</sub> <sup>+2</sup>                                 | 444.1963 <sup>+2</sup> | y <sub>8</sub> -H <sub>3</sub> PO <sub>4</sub> <sup>+2</sup>  | 656.2643 <sup>+2</sup> | y <sub>12</sub> <sup>+2</sup>                                 | 898.3302               | y <sub>7</sub>                                  | 1388.5448 | b <sub>14</sub>                                 |
| 136.5895 <sup>+2</sup> | y <sub>2</sub> <sup>+2</sup>                                 | 449.6687 <sup>+2</sup> | y <sub>7</sub> <sup>+2</sup>                                  | 671.3107               | y <sub>6</sub> -H <sub>3</sub> PO <sub>4</sub>                | 913.8574 <sup>+2</sup> | MH <sup>+2</sup>                                | 1399.6084 | y <sub>14</sub> -H <sub>3</sub> PO <sub>4</sub> |
| 171.1002 <sup>+2</sup> | y <sub>3</sub> -H <sub>3</sub> PO <sub>4</sub> <sup>+2</sup> | 456.2201               | y <sub>4</sub> -H <sub>3</sub> PO <sub>4</sub>                | 682.2556               | y <sub>5</sub>                                                | 929.3847               | b <sub>10</sub>                                 | 1457.5663 | b <sub>15</sub> -H <sub>3</sub> PO <sub>4</sub> |
| 175.119                | y <sub>1</sub>                                               | 459.1722               | b <sub>4</sub>                                                | 684.7750 <sup>+2</sup> | y <sub>13</sub> <sup>+2</sup>                                 | 958.4225               | y <sub>9</sub> -H <sub>3</sub> PO <sub>4</sub>  | 1497.5853 | y <sub>14</sub>                                 |
| 201.087                | b <sub>2</sub>                                               | 479.7149 <sup>+2</sup> | y <sub>9</sub> -H <sub>3</sub> PO <sub>4</sub> <sup>+2</sup>  | 700.3079 <sup>+2</sup> | y <sub>14</sub> -H <sub>3</sub> PO <sub>4</sub> <sup>+2</sup> | 985.3622               | y <sub>8</sub>                                  | 1528.651  | y <sub>15</sub> -H <sub>3</sub> PO <sub>4</sub> |
| 220.0887 <sup>+2</sup> | y <sub>3</sub> <sup>+2</sup>                                 | 493.1848 <sup>+2</sup> | y <sub>8</sub> <sup>+2</sup>                                  | 714.2941               | b <sub>7</sub>                                                | 1015.4439              | y <sub>10</sub> -H <sub>3</sub> PO <sub>4</sub> | 1554.6191 | b <sub>16</sub> -H <sub>3</sub> PO <sub>4</sub> |
| 228.6137 <sup>+2</sup> | y <sub>4</sub> -H <sub>3</sub> PO <sub>4</sub> <sup>+2</sup> | 508.2256 <sup>+2</sup> | y <sub>10</sub> -H <sub>3</sub> PO <sub>4</sub> <sup>+2</sup> | 749.2963 <sup>+2</sup> | y <sub>14</sub> <sup>+2</sup>                                 | 1056.3994              | y <sub>9</sub>                                  | 1555.5432 | b <sub>15</sub>                                 |
| 272.1717               | y <sub>2</sub>                                               | 516.1936               | b <sub>5</sub>                                                | 764.8291 <sup>+2</sup> | y <sub>15</sub> -H <sub>3</sub> PO <sub>4</sub> <sup>+2</sup> | 1058.4273              | b <sub>11</sub>                                 | 1599.6881 | y <sub>16</sub> -H <sub>3</sub> PO <sub>4</sub> |
| 277.6021 <sup>+2</sup> | y <sub>4</sub> <sup>+2</sup>                                 | 528.7033 <sup>+2</sup> | y <sub>9</sub> <sup>+2</sup>                                  | 769.2876               | y <sub>6</sub>                                                | 1113.4208              | y <sub>10</sub>                                 | 1626.6279 | y <sub>15</sub>                                 |
| 292.6430 <sup>+2</sup> | y <sub>5</sub> -H <sub>3</sub> PO <sub>4</sub> <sup>+2</sup> | 554.197                | y <sub>4</sub>                                                | 771.3155               | b <sub>8</sub>                                                | 1116.4916              | y <sub>11</sub> -H <sub>3</sub> PO <sub>4</sub> | 1652.5959 | b <sub>16</sub>                                 |
| 330.1296               | b <sub>3</sub>                                               | 557.2140 <sup>+2</sup> | y <sub>10</sub> <sup>+2</sup>                                 | 800.3477 <sup>+2</sup> | y <sub>16</sub> -H <sub>3</sub> PO <sub>4</sub> <sup>+2</sup> | 1145.4593              | b <sub>12</sub>                                 | 1697.665  | y <sub>16</sub>                                 |
| 336.1590 <sup>+2</sup> | y <sub>6</sub> -H <sub>3</sub> PO <sub>4</sub> <sup>+2</sup> | 558.7494 <sup>+2</sup> | y <sub>11</sub> -H <sub>3</sub> PO <sub>4</sub> <sup>+2</sup> | 800.3533               | y <sub>7</sub> -H <sub>3</sub> PO <sub>4</sub>                | 1213.5444              | y <sub>12</sub> -H <sub>3</sub> PO <sub>4</sub> | 1728.7307 | MH-H <sub>3</sub> PO <sub>4</sub>               |
| 341.1932               | y <sub>3</sub> -H <sub>3</sub> PO <sub>4</sub>               | 584.2787               | y <sub>5</sub> -H <sub>3</sub> PO <sub>4</sub>                | 813.8176 <sup>+2</sup> | y <sub>15</sub> <sup>+2</sup>                                 | 1214.4685              | y <sub>11</sub>                                 | 1826.7076 | MH                                              |
| 341.6314 <sup>+2</sup> | y <sub>5</sub> <sup>+2</sup>                                 | 607.2758 <sup>+2</sup> | y <sub>12</sub> -H <sub>3</sub> PO <sub>4</sub> <sup>+2</sup> | 842.3527               | b <sub>9</sub>                                                | 1270.5658              | y <sub>13</sub> -H <sub>3</sub> PO <sub>4</sub> |           |                                                 |
| 385.1475 <sup>+2</sup> | y <sub>6</sub> <sup>+2</sup>                                 | 607.7379 <sup>+2</sup> | y <sub>11</sub> <sup>+2</sup>                                 | 849.3362 <sup>+2</sup> | y <sub>16</sub> <sup>+2</sup>                                 | 1273.5179              | b <sub>13</sub>                                 |           |                                                 |
| 400.6803 <sup>+2</sup> | y <sub>7</sub> -H <sub>3</sub> PO <sub>4</sub> <sup>+2</sup> | 613.2464               | b <sub>6</sub>                                                | 864.8690 <sup>+2</sup> | MH-H <sub>3</sub> PO <sub>4</sub> <sup>+2</sup>               | 1311.5213              | y <sub>12</sub>                                 |           |                                                 |
| 439.1701               | y <sub>3</sub>                                               | 635.7866 <sup>+2</sup> | y <sub>13</sub> -H <sub>3</sub> PO <sub>4</sub> <sup>+2</sup> | 887.3854               | y <sub>8</sub> -H <sub>3</sub> PO <sub>4</sub>                | 1368.5427              | y <sub>13</sub>                                 |           |                                                 |

MS/MS Fragmentation of SSs MS/MS Fragmentation of (SSS)DLITLPATTPPCPTKK  
 Found in IPI00400923, SH3 multiple domains 1 DLITLPATTPPCPTKK  
 Found in IPI00400923, SH3 multiple domains 1

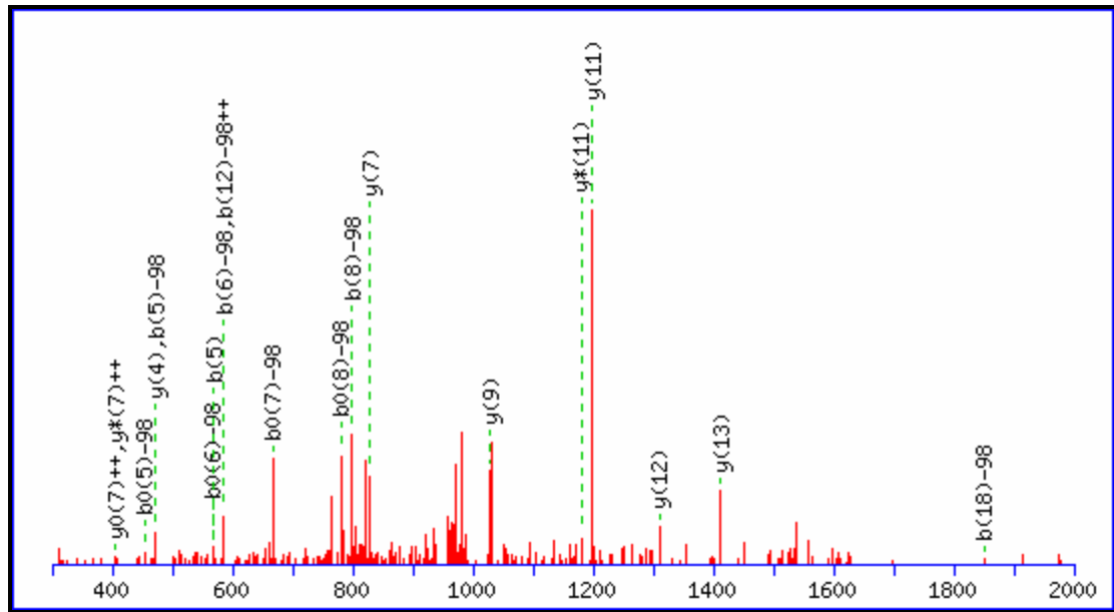

|                        |                                                |                        |                                                |                        |                                                               |                         |                                                 |           |                                                 |
|------------------------|------------------------------------------------|------------------------|------------------------------------------------|------------------------|---------------------------------------------------------------|-------------------------|-------------------------------------------------|-----------|-------------------------------------------------|
| 74.0600 <sup>+2</sup>  | y <sub>1</sub> <sup>+2</sup>                   | 472.2038               | b <sub>5</sub> -H <sub>3</sub> PO <sub>4</sub> | 790.9577 <sup>+2</sup> | y <sub>15</sub> <sup>+2</sup>                                 | 1019.0023 <sup>+2</sup> | MH <sup>+2</sup>                                | 1563.7723 | b <sub>16</sub> -H <sub>3</sub> PO <sub>4</sub> |
| 138.1075 <sup>+2</sup> | y <sub>2</sub> <sup>+2</sup>                   | 473.3082               | y <sub>4</sub>                                 | 799.4196               | b <sub>8</sub> -H <sub>3</sub> PO <sub>4</sub>                | 1043.5554               | y <sub>10</sub>                                 | 1564.6965 | b <sub>15</sub>                                 |
| 147.1128               | y <sub>1</sub>                                 | 486.7628 <sup>+2</sup> | y <sub>9</sub> <sup>+2</sup>                   | 848.4711 <sup>+2</sup> | y <sub>16</sub> <sup>+2</sup>                                 | 1065.4864               | b <sub>10</sub>                                 | 1580.908  | y <sub>15</sub>                                 |
| 175.0713               | b <sub>2</sub>                                 | 522.2813 <sup>+2</sup> | y <sub>10</sub> <sup>+2</sup>                  | 871.4706               | y <sub>8</sub>                                                | 1068.5572               | b <sub>11</sub> -H <sub>3</sub> PO <sub>4</sub> | 1661.7492 | b <sub>16</sub>                                 |
| 188.6314 <sup>+2</sup> | y <sub>3</sub> <sup>+2</sup>                   | 570.1807               | b <sub>5</sub>                                 | 882.9819 <sup>+2</sup> | y <sub>17</sub> -H <sub>3</sub> PO <sub>4</sub> <sup>+2</sup> | 1140.6082               | y <sub>11</sub>                                 | 1664.82   | b <sub>17</sub> -H <sub>3</sub> PO <sub>4</sub> |
| 237.1577 <sup>+2</sup> | y <sub>4</sub> <sup>+2</sup>                   | 570.8077 <sup>+2</sup> | y <sub>11</sub> <sup>+2</sup>                  | 896.4724               | b <sub>9</sub> -H <sub>3</sub> PO <sub>4</sub>                | 1166.5341               | b <sub>11</sub>                                 | 1695.935  | y <sub>16</sub>                                 |
| 244.0928               | b <sub>3</sub> -H <sub>3</sub> PO <sub>4</sub> | 576.3174               | y <sub>5</sub>                                 | 896.9611 <sup>+2</sup> | b <sub>18</sub> -H <sub>3</sub> PO <sub>4</sub> <sup>+2</sup> | 1169.6048               | b <sub>12</sub> -H <sub>3</sub> PO <sub>4</sub> | 1762.7969 | b <sub>17</sub>                                 |
| 275.2078               | y <sub>2</sub>                                 | 585.2879               | b <sub>6</sub> -H <sub>3</sub> PO <sub>4</sub> | 897.3965               | b <sub>8</sub>                                                | 1253.6922               | y <sub>12</sub>                                 | 1764.9564 | y <sub>17</sub> -H <sub>3</sub> PO <sub>4</sub> |
| 288.6623 <sup>+2</sup> | y <sub>5</sub> <sup>+2</sup>                   | 627.3497 <sup>+2</sup> | y <sub>12</sub> <sup>+2</sup>                  | 926.4979 <sup>+2</sup> | y <sub>18</sub> -H <sub>3</sub> PO <sub>4</sub> <sup>+2</sup> | 1266.6576               | b <sub>13</sub> -H <sub>3</sub> PO <sub>4</sub> | 1792.915  | b <sub>18</sub> -H <sub>3</sub> PO <sub>4</sub> |
| 337.1887 <sup>+2</sup> | y <sub>6</sub> <sup>+2</sup>                   | 673.3702               | y <sub>6</sub>                                 | 931.9703 <sup>+2</sup> | y <sub>17</sub> <sup>+2</sup>                                 | 1267.5817               | b <sub>12</sub>                                 | 1851.9885 | y <sub>18</sub> -H <sub>3</sub> PO <sub>4</sub> |
| 342.0697               | b <sub>3</sub>                                 | 677.8736 <sup>+2</sup> | y <sub>13</sub> <sup>+2</sup>                  | 945.9496 <sup>+2</sup> | b <sub>18</sub> <sup>+2</sup>                                 | 1354.7399               | y <sub>13</sub>                                 | 1862.9333 | y <sub>17</sub>                                 |
| 359.1197               | b <sub>4</sub> -H <sub>3</sub> PO <sub>4</sub> | 683.2648               | b <sub>6</sub>                                 | 967.5095               | b <sub>10</sub> -H <sub>3</sub> PO <sub>4</sub>               | 1363.7104               | b <sub>14</sub> -H <sub>3</sub> PO <sub>4</sub> | 1890.8919 | b <sub>18</sub>                                 |
| 376.2554               | y <sub>3</sub>                                 | 686.3355               | b <sub>7</sub> -H <sub>3</sub> PO <sub>4</sub> | 970.0139 <sup>+2</sup> | MH-H <sub>3</sub> PO <sub>4</sub> <sup>+2</sup>               | 1364.6345               | b <sub>13</sub>                                 | 1939.0205 | MH-H <sub>3</sub> PO <sub>4</sub>               |
| 385.7151 <sup>+2</sup> | y <sub>7</sub> <sup>+2</sup>                   | 734.4156 <sup>+2</sup> | y <sub>14</sub> <sup>+2</sup>                  | 972.5183               | y <sub>9</sub>                                                | 1461.6873               | b <sub>14</sub>                                 | 1949.9654 | y <sub>18</sub>                                 |
| 436.2389 <sup>+2</sup> | y <sub>8</sub> <sup>+2</sup>                   | 770.4229               | y <sub>7</sub>                                 | 975.4863 <sup>+2</sup> | y <sub>18</sub> <sup>+2</sup>                                 | 1466.7196               | b <sub>15</sub> -H <sub>3</sub> PO <sub>4</sub> | 2036.9974 | MH                                              |
| 457.0966               | b <sub>4</sub>                                 | 784.3124               | b <sub>7</sub>                                 | 994.4493               | b <sub>9</sub>                                                | 1467.824                | y <sub>14</sub>                                 |           |                                                 |

MS/MS Fragmentation of EIsLPILCNASNGSAVGVPDR  
 Found in IPI00400923, SH3 multiple domains 1

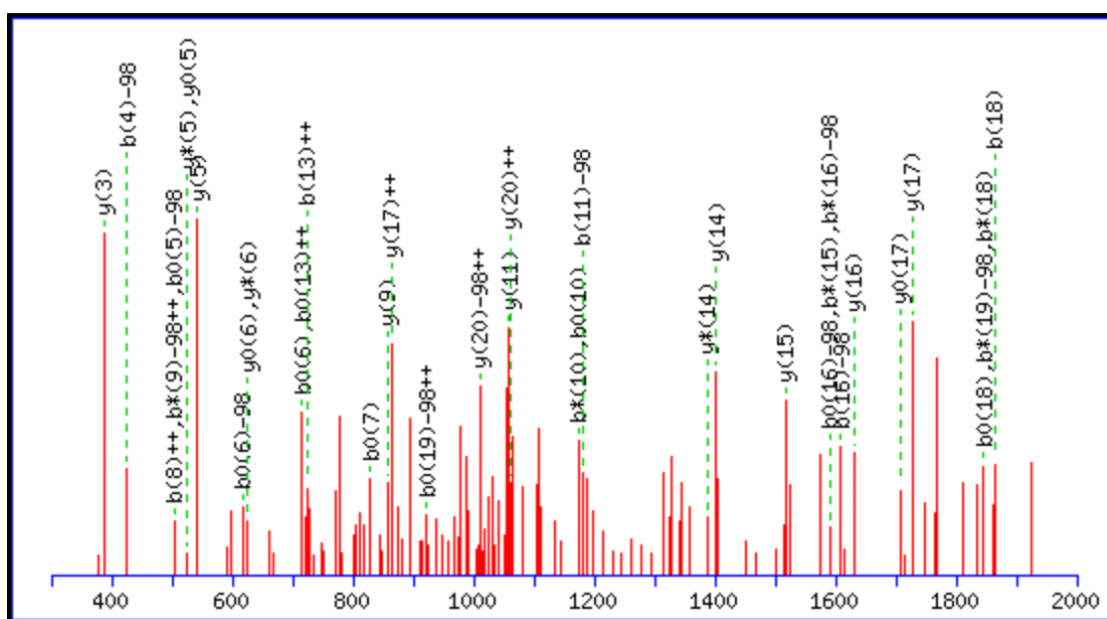

|                        |                                                |                        |                                                |                         |                                                               |           |                                                 |           |                                                 |
|------------------------|------------------------------------------------|------------------------|------------------------------------------------|-------------------------|---------------------------------------------------------------|-----------|-------------------------------------------------|-----------|-------------------------------------------------|
| 88.0631 <sup>+2</sup>  | y <sub>1</sub> <sup>+2</sup>                   | 486.2671               | y <sub>4</sub>                                 | 835.4200 <sup>+2</sup>  | y <sub>17</sub> <sup>+2</sup>                                 | 1123.5816 | b <sub>11</sub> -H <sub>3</sub> PO <sub>4</sub> | 1608.805  | b <sub>17</sub> -H <sub>3</sub> PO <sub>4</sub> |
| 145.5766 <sup>+2</sup> | y <sub>2</sub> <sup>+2</sup>                   | 522.2922               | b <sub>5</sub> -H <sub>3</sub> PO <sub>4</sub> | 846.4372                | b <sub>7</sub>                                                | 1129.5596 | y <sub>12</sub>                                 | 1649.7604 | b <sub>16</sub>                                 |
| 175.119                | y <sub>1</sub>                                 | 523.2164               | b <sub>4</sub>                                 | 851.4695                | b <sub>8</sub> -H <sub>3</sub> PO <sub>4</sub>                | 1134.5265 | b <sub>10</sub>                                 | 1669.8326 | y <sub>17</sub>                                 |
| 194.1030 <sup>+2</sup> | y <sub>3</sub> <sup>+2</sup>                   | 529.7649 <sup>+2</sup> | y <sub>11</sub> <sup>+2</sup>                  | 857.4476                | y <sub>9</sub>                                                | 1221.5585 | b <sub>11</sub>                                 | 1706.7819 | b <sub>17</sub>                                 |
| 243.1339               | b <sub>2</sub>                                 | 543.2885               | y <sub>5</sub>                                 | 891.9620 <sup>+2</sup>  | y <sub>18</sub> <sup>+2</sup>                                 | 1237.6245 | b <sub>12</sub> -H <sub>3</sub> PO <sub>4</sub> | 1707.8734 | b <sub>18</sub> -H <sub>3</sub> PO <sub>4</sub> |
| 243.6372 <sup>+2</sup> | y <sub>4</sub> <sup>+2</sup>                   | 565.2835 <sup>+2</sup> | y <sub>12</sub> <sup>+2</sup>                  | 926.4727 <sup>+2</sup>  | y <sub>19</sub> -H <sub>3</sub> PO <sub>4</sub> <sup>+2</sup> | 1243.6026 | y <sub>13</sub>                                 | 1782.9167 | y <sub>18</sub>                                 |
| 272.1479 <sup>+2</sup> | y <sub>5</sub> <sup>+2</sup>                   | 620.2691               | b <sub>5</sub>                                 | 949.4464                | b <sub>8</sub>                                                | 1294.646  | b <sub>13</sub> -H <sub>3</sub> PO <sub>4</sub> | 1804.9262 | b <sub>19</sub> -H <sub>3</sub> PO <sub>4</sub> |
| 290.1459               | y <sub>2</sub>                                 | 622.3049 <sup>+2</sup> | y <sub>13</sub> <sup>+2</sup>                  | 965.5125                | b <sub>9</sub> -H <sub>3</sub> PO <sub>4</sub>                | 1335.6014 | b <sub>12</sub>                                 | 1805.8503 | b <sub>18</sub>                                 |
| 312.1554               | b <sub>3</sub> -H <sub>3</sub> PO <sub>4</sub> | 635.3763               | b <sub>6</sub> -H <sub>3</sub> PO <sub>4</sub> | 971.4905                | y <sub>10</sub>                                               | 1346.6117 | y <sub>14</sub>                                 | 1851.9382 | y <sub>19</sub> -H <sub>3</sub> PO <sub>4</sub> |
| 321.6821 <sup>+2</sup> | y <sub>6</sub> <sup>+2</sup>                   | 642.357                | y <sub>6</sub>                                 | 975.4612 <sup>+2</sup>  | y <sub>19</sub> <sup>+2</sup>                                 | 1381.678  | b <sub>14</sub> -H <sub>3</sub> PO <sub>4</sub> | 1902.9031 | b <sub>19</sub>                                 |
| 357.2007 <sup>+2</sup> | y <sub>7</sub> <sup>+2</sup>                   | 673.8095 <sup>+2</sup> | y <sub>14</sub> <sup>+2</sup>                  | 983.0147 <sup>+2</sup>  | y <sub>20</sub> -H <sub>3</sub> PO <sub>4</sub> <sup>+2</sup> | 1392.6229 | b <sub>13</sub>                                 | 1919.9531 | b <sub>20</sub> -H <sub>3</sub> PO <sub>4</sub> |
| 387.1987               | y <sub>3</sub>                                 | 713.3941               | y <sub>7</sub>                                 | 1032.0032 <sup>+2</sup> | y <sub>20</sub> <sup>+2</sup>                                 | 1452.7151 | b <sub>15</sub> -H <sub>3</sub> PO <sub>4</sub> | 1949.9151 | y <sub>19</sub>                                 |
| 400.7167 <sup>+2</sup> | y <sub>8</sub> <sup>+2</sup>                   | 730.3515 <sup>+2</sup> | y <sub>15</sub> <sup>+2</sup>                  | 1036.5496               | b <sub>10</sub> -H <sub>3</sub> PO <sub>4</sub>               | 1459.6958 | y <sub>15</sub>                                 | 1965.0222 | y <sub>20</sub> -H <sub>3</sub> PO <sub>4</sub> |
| 410.1323               | b <sub>3</sub>                                 | 733.3532               | b <sub>6</sub>                                 | 1047.5360 <sup>+2</sup> | MH-H <sub>3</sub> PO <sub>4</sub> <sup>+2</sup>               | 1479.6549 | b <sub>14</sub>                                 | 2017.793  | b <sub>20</sub>                                 |
| 425.2395               | b <sub>4</sub> -H <sub>3</sub> PO <sub>4</sub> | 748.4604               | b <sub>7</sub> -H <sub>3</sub> PO <sub>4</sub> | 1058.5225               | y <sub>11</sub>                                               | 1550.692  | b <sub>15</sub>                                 | 2062.9991 | y <sub>20</sub>                                 |
| 429.2274 <sup>+2</sup> | y <sub>9</sub> <sup>+2</sup>                   | 786.8936 <sup>+2</sup> | y <sub>16</sub> <sup>+2</sup>                  | 1063.4894               | b <sub>9</sub>                                                | 1551.7836 | b <sub>16</sub> -H <sub>3</sub> PO <sub>4</sub> | 2094.0648 | MH-H <sub>3</sub> PO <sub>4</sub>               |
| 486.2489 <sup>+2</sup> | y <sub>10</sub> <sup>+2</sup>                  | 800.4261               | y <sub>8</sub>                                 | 1096.5245 <sup>+2</sup> | MH <sup>+2</sup>                                              | 1572.7799 | y <sub>16</sub>                                 | 2192.0417 | MH                                              |

MS/MS Fragmentation of AQ(SS)PASATFPVSVQEPPTKPR  
 Found in IPI00010088, Histone deacetylase 4

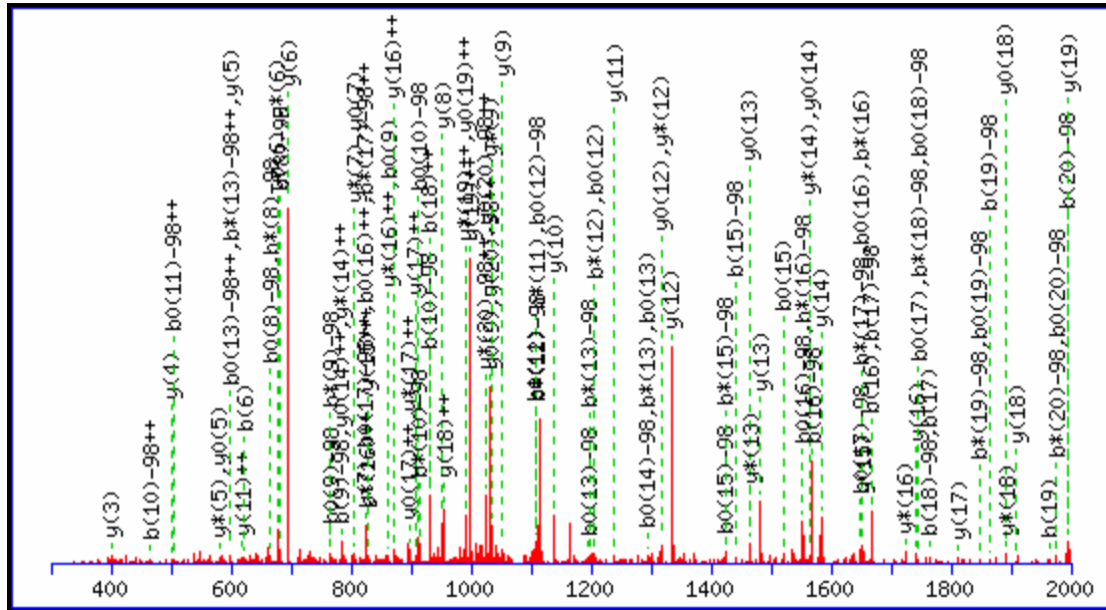

|                        |                                                |                        |                                                |                         |                                                               |                         |                                                 |           |                                                 |
|------------------------|------------------------------------------------|------------------------|------------------------------------------------|-------------------------|---------------------------------------------------------------|-------------------------|-------------------------------------------------|-----------|-------------------------------------------------|
| 88.0631 <sup>+2</sup>  | y <sub>1</sub> <sup>+2</sup>                   | 526.2984 <sup>+2</sup> | y <sub>9</sub> <sup>+2</sup>                   | 906.4862 <sup>+2</sup>  | y <sub>17</sub> <sup>+2</sup>                                 | 1146.0570 <sup>+2</sup> | y <sub>21</sub> <sup>+2</sup>                   | 1764.784  | b <sub>17</sub>                                 |
| 136.5895 <sup>+2</sup> | y <sub>2</sub> <sup>+2</sup>                   | 551.1861               | b <sub>5</sub>                                 | 930.4316                | b <sub>10</sub> -H <sub>3</sub> PO <sub>4</sub>               | 1181.5756 <sup>+2</sup> | MH <sup>+2</sup>                                | 1811.965  | y <sub>17</sub>                                 |
| 175.119                | y <sub>1</sub>                                 | 569.8144 <sup>+2</sup> | y <sub>10</sub> <sup>+2</sup>                  | 952.5211                | y <sub>8</sub>                                                | 1213.5848               | b <sub>13</sub> -H <sub>3</sub> PO <sub>4</sub> | 1861.8368 | b <sub>18</sub>                                 |
| 200.103                | b <sub>2</sub>                                 | 598.3671               | y <sub>5</sub>                                 | 955.0125 <sup>+2</sup>  | y <sub>18</sub> <sup>+2</sup>                                 | 1224.5296               | b <sub>12</sub>                                 | 1864.9076 | b <sub>19</sub> -H <sub>3</sub> PO <sub>4</sub> |
| 200.6370 <sup>+2</sup> | y <sub>3</sub> <sup>+2</sup>                   | 611.2784               | b <sub>7</sub> -H <sub>3</sub> PO <sub>4</sub> | 997.0049 <sup>+2</sup>  | b <sub>20</sub> -H <sub>3</sub> PO <sub>4</sub> <sup>+2</sup> | 1237.6899               | y <sub>11</sub>                                 | 1909.0178 | y <sub>18</sub>                                 |
| 251.1608 <sup>+2</sup> | y <sub>4</sub> <sup>+2</sup>                   | 619.3486 <sup>+2</sup> | y <sub>11</sub> <sup>+2</sup>                  | 998.5285 <sup>+2</sup>  | y <sub>19</sub> <sup>+2</sup>                                 | 1311.5617               | b <sub>13</sub>                                 | 1962.8845 | b <sub>19</sub>                                 |
| 269.1244               | b <sub>3</sub> -H <sub>3</sub> PO <sub>4</sub> | 622.2232               | b <sub>6</sub>                                 | 1027.4843               | b <sub>11</sub> -H <sub>3</sub> PO <sub>4</sub>               | 1312.6532               | b <sub>14</sub> -H <sub>3</sub> PO <sub>4</sub> | 1993.0025 | b <sub>20</sub> -H <sub>3</sub> PO <sub>4</sub> |
| 272.1717               | y <sub>2</sub>                                 | 667.8750 <sup>+2</sup> | y <sub>12</sub> <sup>+2</sup>                  | 1028.4085               | b <sub>10</sub>                                               | 1334.7427               | y <sub>12</sub>                                 | 1996.0498 | y <sub>19</sub>                                 |
| 299.6872 <sup>+2</sup> | y <sub>5</sub> <sup>+2</sup>                   | 682.3155               | b <sub>8</sub> -H <sub>3</sub> PO <sub>4</sub> | 1033.0393 <sup>+2</sup> | y <sub>20</sub> -H <sub>3</sub> PO <sub>4</sub> <sup>+2</sup> | 1410.6301               | b <sub>14</sub>                                 | 2065.0713 | y <sub>20</sub> -H <sub>3</sub> PO <sub>4</sub> |
| 348.2136 <sup>+2</sup> | y <sub>6</sub> <sup>+2</sup>                   | 695.4199               | y <sub>6</sub>                                 | 1045.5313 <sup>+2</sup> | b <sub>21</sub> -H <sub>3</sub> PO <sub>4</sub> <sup>+2</sup> | 1440.7118               | b <sub>15</sub> -H <sub>3</sub> PO <sub>4</sub> | 2090.0553 | b <sub>21</sub> -H <sub>3</sub> PO <sub>4</sub> |
| 356.1565               | b <sub>4</sub> -H <sub>3</sub> PO <sub>4</sub> | 709.2553               | b <sub>7</sub>                                 | 1045.9934 <sup>+2</sup> | b <sub>20</sub> <sup>+2</sup>                                 | 1481.8111               | y <sub>13</sub>                                 | 2090.9794 | b <sub>20</sub>                                 |
| 367.1013               | b <sub>3</sub>                                 | 741.4092 <sup>+2</sup> | y <sub>13</sub> <sup>+2</sup>                  | 1051.5895               | y <sub>9</sub>                                                | 1538.6887               | b <sub>15</sub>                                 | 2163.0482 | y <sub>20</sub>                                 |
| 400.2667               | y <sub>3</sub>                                 | 780.2924               | b <sub>8</sub>                                 | 1082.0277 <sup>+2</sup> | y <sub>20</sub> <sup>+2</sup>                                 | 1569.7544               | b <sub>16</sub> -H <sub>3</sub> PO <sub>4</sub> | 2188.0322 | b <sub>21</sub>                                 |
| 412.7349 <sup>+2</sup> | y <sub>7</sub> <sup>+2</sup>                   | 783.3632               | b <sub>9</sub> -H <sub>3</sub> PO <sub>4</sub> | 1094.5197 <sup>+2</sup> | b <sub>21</sub> <sup>+2</sup>                                 | 1582.8588               | y <sub>14</sub>                                 | 2193.1299 | y <sub>21</sub> -H <sub>3</sub> PO <sub>4</sub> |
| 453.2092               | b <sub>5</sub> -H <sub>3</sub> PO <sub>4</sub> | 791.9330 <sup>+2</sup> | y <sub>14</sub> <sup>+2</sup>                  | 1097.0686 <sup>+2</sup> | y <sub>21</sub> -H <sub>3</sub> PO <sub>4</sub> <sup>+2</sup> | 1653.8959               | y <sub>15</sub>                                 | 2264.167  | MH-H <sub>3</sub> PO <sub>4</sub>               |
| 454.1334               | b <sub>4</sub>                                 | 824.4625               | y <sub>7</sub>                                 | 1125.4612               | b <sub>11</sub>                                               | 1666.8071               | b <sub>17</sub> -H <sub>3</sub> PO <sub>4</sub> | 2291.1068 | y <sub>21</sub>                                 |
| 476.7642 <sup>+2</sup> | y <sub>8</sub> <sup>+2</sup>                   | 827.4516 <sup>+2</sup> | y <sub>15</sub> <sup>+2</sup>                  | 1126.5527               | b <sub>12</sub> -H <sub>3</sub> PO <sub>4</sub>               | 1667.7313               | b <sub>16</sub>                                 | 2362.1439 | MH                                              |
| 501.3144               | y <sub>4</sub>                                 | 870.9676 <sup>+2</sup> | y <sub>16</sub> <sup>+2</sup>                  | 1132.5871 <sup>+2</sup> | MH-H <sub>3</sub> PO <sub>4</sub> <sup>+2</sup>               | 1740.9279               | y <sub>16</sub>                                 |           |                                                 |
| 524.2463               | b <sub>6</sub> -H <sub>3</sub> PO <sub>4</sub> | 881.3401               | b <sub>9</sub>                                 | 1138.6215               | y <sub>10</sub>                                               | 1763.8599               | b <sub>18</sub> -H <sub>3</sub> PO <sub>4</sub> |           |                                                 |



MS/MS Fragmentation of RNsRTEEPTVAESVENGHR  
 Found in IPI00179071, Nuclear receptor coactivator 6

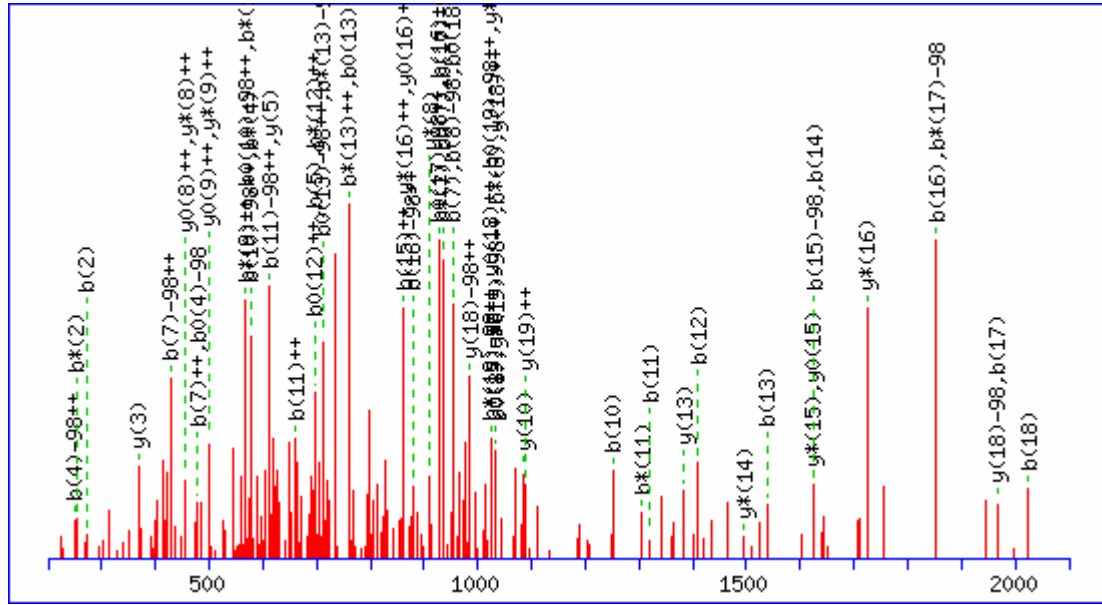

|                        |                                                              |                        |                                                               |                         |                                                               |                         |                                                               |           |                                                 |
|------------------------|--------------------------------------------------------------|------------------------|---------------------------------------------------------------|-------------------------|---------------------------------------------------------------|-------------------------|---------------------------------------------------------------|-----------|-------------------------------------------------|
| 88.0631 <sup>+2</sup>  | y <sub>1</sub> <sup>+2</sup>                                 | 476.7334 <sup>+2</sup> | b <sub>8</sub> -H <sub>3</sub> PO <sub>4</sub> <sup>+2</sup>  | 726.3642                | b <sub>6</sub> -H <sub>3</sub> PO <sub>4</sub>                | 1031.9805 <sup>+2</sup> | b <sub>19</sub> -H <sub>3</sub> PO <sub>4</sub> <sup>+2</sup> | 1624.6963 | b <sub>14</sub>                                 |
| 136.0793 <sup>+2</sup> | b <sub>2</sub> <sup>+2</sup>                                 | 477.1955 <sup>+2</sup> | b <sub>7</sub> <sup>+2</sup>                                  | 756.3579 <sup>+2</sup>  | y <sub>14</sub> <sup>+2</sup>                                 | 1032.9527 <sup>+2</sup> | y <sub>18</sub> <sup>+2</sup>                                 | 1625.7878 | b <sub>15</sub> -H <sub>3</sub> PO <sub>4</sub> |
| 156.5926 <sup>+2</sup> | y <sub>2</sub> <sup>+2</sup>                                 | 483.2423               | y <sub>4</sub>                                                | 763.8633 <sup>+2</sup>  | b <sub>14</sub> -H <sub>3</sub> PO <sub>4</sub> <sup>+2</sup> | 1040.9858 <sup>+2</sup> | y <sub>19</sub> -H <sub>3</sub> PO <sub>4</sub> <sup>+2</sup> | 1640.7511 | y <sub>15</sub>                                 |
| 170.5900 <sup>+2</sup> | b <sub>3</sub> -H <sub>3</sub> PO <sub>4</sub> <sup>+2</sup> | 496.2739               | b <sub>4</sub> -H <sub>3</sub> PO <sub>4</sub>                | 769.3358 <sup>+2</sup>  | b <sub>13</sub> <sup>+2</sup>                                 | 1050.4364               | b <sub>8</sub>                                                | 1723.7647 | b <sub>15</sub>                                 |
| 175.119                | y <sub>1</sub>                                               | 507.7336 <sup>+2</sup> | y <sub>9</sub> <sup>+2</sup>                                  | 798.3853                | y <sub>7</sub>                                                | 1053.5072               | b <sub>9</sub> -H <sub>3</sub> PO <sub>4</sub>                | 1741.7987 | y <sub>16</sub>                                 |
| 185.1033 <sup>+2</sup> | y <sub>3</sub> <sup>+2</sup>                                 | 525.7218 <sup>+2</sup> | b <sub>8</sub> <sup>+2</sup>                                  | 812.8518 <sup>+2</sup>  | b <sub>14</sub> <sup>+2</sup>                                 | 1080.9689 <sup>+2</sup> | b <sub>19</sub> <sup>+2</sup>                                 | 1754.8304 | b <sub>16</sub> -H <sub>3</sub> PO <sub>4</sub> |
| 219.5785 <sup>+2</sup> | b <sub>3</sub> <sup>+2</sup>                                 | 527.2572 <sup>+2</sup> | b <sub>9</sub> -H <sub>3</sub> PO <sub>4</sub> <sup>+2</sup>  | 813.3975 <sup>+2</sup>  | b <sub>15</sub> -H <sub>3</sub> PO <sub>4</sub> <sup>+2</sup> | 1085.497                | y <sub>10</sub>                                               | 1852.8073 | b <sub>16</sub>                                 |
| 242.1248 <sup>+2</sup> | y <sub>4</sub> <sup>+2</sup>                                 | 543.2522 <sup>+2</sup> | y <sub>10</sub> <sup>+2</sup>                                 | 820.8792 <sup>+2</sup>  | y <sub>15</sub> <sup>+2</sup>                                 | 1089.9742 <sup>+2</sup> | y <sub>19</sub> <sup>+2</sup>                                 | 1868.8733 | b <sub>17</sub> -H <sub>3</sub> PO <sub>4</sub> |
| 248.6406 <sup>+2</sup> | b <sub>4</sub> -H <sub>3</sub> PO <sub>4</sub> <sup>+2</sup> | 576.2457 <sup>+2</sup> | b <sub>9</sub> <sup>+2</sup>                                  | 824.3411                | b <sub>6</sub>                                                | 1119.0363 <sup>+2</sup> | MH-H <sub>3</sub> PO <sub>4</sub> <sup>+2</sup>               | 1897.8999 | y <sub>17</sub>                                 |
| 271.1513               | b <sub>2</sub>                                               | 576.7914 <sup>+2</sup> | b <sub>10</sub> -H <sub>3</sub> PO <sub>4</sub> <sup>+2</sup> | 855.4068                | b <sub>7</sub> -H <sub>3</sub> PO <sub>4</sub>                | 1151.4841               | b <sub>9</sub>                                                | 1925.8948 | b <sub>18</sub> -H <sub>3</sub> PO <sub>4</sub> |
| 297.6290 <sup>+2</sup> | b <sub>4</sub> <sup>+2</sup>                                 | 592.7864 <sup>+2</sup> | y <sub>11</sub> <sup>+2</sup>                                 | 862.3860 <sup>+2</sup>  | b <sub>15</sub> <sup>+2</sup>                                 | 1152.5756               | b <sub>10</sub> -H <sub>3</sub> PO <sub>4</sub>               | 1966.8502 | b <sub>17</sub>                                 |
| 299.1644 <sup>+2</sup> | b <sub>5</sub> -H <sub>3</sub> PO <sub>4</sub> <sup>+2</sup> | 594.2508               | b <sub>4</sub>                                                | 871.4030 <sup>+2</sup>  | y <sub>16</sub> <sup>+2</sup>                                 | 1168.0248 <sup>+2</sup> | MH <sup>+2</sup>                                              | 1966.9213 | y <sub>18</sub> -H <sub>3</sub> PO <sub>4</sub> |
| 306.6461 <sup>+2</sup> | y <sub>5</sub> <sup>+2</sup>                                 | 597.3216               | b <sub>5</sub> -H <sub>3</sub> PO <sub>4</sub>                | 877.9188 <sup>+2</sup>  | b <sub>16</sub> -H <sub>3</sub> PO <sub>4</sub> <sup>+2</sup> | 1184.5654               | y <sub>11</sub>                                               | 2023.8717 | b <sub>18</sub>                                 |
| 312.1779               | y <sub>2</sub>                                               | 612.2848               | y <sub>5</sub>                                                | 926.9073 <sup>+2</sup>  | b <sub>16</sub> <sup>+2</sup>                                 | 1223.6127               | b <sub>11</sub> -H <sub>3</sub> PO <sub>4</sub>               | 2062.9537 | b <sub>19</sub> -H <sub>3</sub> PO <sub>4</sub> |
| 340.1728               | b <sub>3</sub> -H <sub>3</sub> PO <sub>4</sub>               | 612.3100 <sup>+2</sup> | b <sub>11</sub> -H <sub>3</sub> PO <sub>4</sub> <sup>+2</sup> | 927.4279                | y <sub>8</sub>                                                | 1250.5525               | b <sub>10</sub>                                               | 2064.8982 | y <sub>18</sub>                                 |
| 348.1529 <sup>+2</sup> | b <sub>5</sub> <sup>+2</sup>                                 | 625.7799 <sup>+2</sup> | b <sub>10</sub> <sup>+2</sup>                                 | 934.9403 <sup>+2</sup>  | b <sub>17</sub> -H <sub>3</sub> PO <sub>4</sub> <sup>+2</sup> | 1285.6131               | y <sub>12</sub>                                               | 2080.9642 | y <sub>19</sub> -H <sub>3</sub> PO <sub>4</sub> |
| 356.1803 <sup>+2</sup> | y <sub>6</sub> <sup>+2</sup>                                 | 643.3102 <sup>+2</sup> | y <sub>12</sub> <sup>+2</sup>                                 | 949.4536 <sup>+2</sup>  | y <sub>17</sub> <sup>+2</sup>                                 | 1310.6448               | b <sub>12</sub> -H <sub>3</sub> PO <sub>4</sub>               | 2160.9306 | b <sub>19</sub>                                 |
| 363.6857 <sup>+2</sup> | b <sub>6</sub> -H <sub>3</sub> PO <sub>4</sub> <sup>+2</sup> | 655.8260 <sup>+2</sup> | b <sub>12</sub> -H <sub>3</sub> PO <sub>4</sub> <sup>+2</sup> | 952.4595                | b <sub>8</sub> -H <sub>3</sub> PO <sub>4</sub>                | 1321.5896               | b <sub>11</sub>                                               | 2178.9411 | y <sub>19</sub>                                 |
| 369.1993               | y <sub>3</sub>                                               | 661.2984 <sup>+2</sup> | b <sub>11</sub> <sup>+2</sup>                                 | 953.3836                | b <sub>7</sub>                                                | 1382.6659               | y <sub>13</sub>                                               | 2237.0654 | MH-H <sub>3</sub> PO <sub>4</sub>               |
| 399.6963 <sup>+2</sup> | y <sub>7</sub> <sup>+2</sup>                                 | 691.8366 <sup>+2</sup> | y <sub>13</sub> <sup>+2</sup>                                 | 963.4510 <sup>+2</sup>  | b <sub>18</sub> -H <sub>3</sub> PO <sub>4</sub> <sup>+2</sup> | 1408.6216               | b <sub>12</sub>                                               | 2335.0423 | MH                                              |
| 412.6742 <sup>+2</sup> | b <sub>6</sub> <sup>+2</sup>                                 | 695.2985               | b <sub>5</sub>                                                | 983.9287 <sup>+2</sup>  | b <sub>17</sub> <sup>+2</sup>                                 | 1439.6873               | b <sub>13</sub> -H <sub>3</sub> PO <sub>4</sub>               |           |                                                 |
| 428.2070 <sup>+2</sup> | b <sub>7</sub> -H <sub>3</sub> PO <sub>4</sub> <sup>+2</sup> | 704.8145 <sup>+2</sup> | b <sub>12</sub> <sup>+2</sup>                                 | 983.9643 <sup>+2</sup>  | y <sub>18</sub> -H <sub>3</sub> PO <sub>4</sub> <sup>+2</sup> | 1511.7085               | y <sub>14</sub>                                               |           |                                                 |
| 438.1497               | b <sub>3</sub>                                               | 711.3533               | y <sub>6</sub>                                                | 1012.4395 <sup>+2</sup> | b <sub>18</sub> <sup>+2</sup>                                 | 1526.7194               | b <sub>14</sub> -H <sub>3</sub> PO <sub>4</sub>               |           |                                                 |
| 464.2176 <sup>+2</sup> | y <sub>8</sub> <sup>+2</sup>                                 | 720.3473 <sup>+2</sup> | b <sub>13</sub> -H <sub>3</sub> PO <sub>4</sub> <sup>+2</sup> | 1014.4599               | y <sub>9</sub>                                                | 1537.6642               | b <sub>13</sub>                                               |           |                                                 |

MS/MS Fragmentation of mTsSPVGPGTASAGPSLPGGALPTSVR  
 Found in IPI00179071, Nuclear receptor coactivator 6

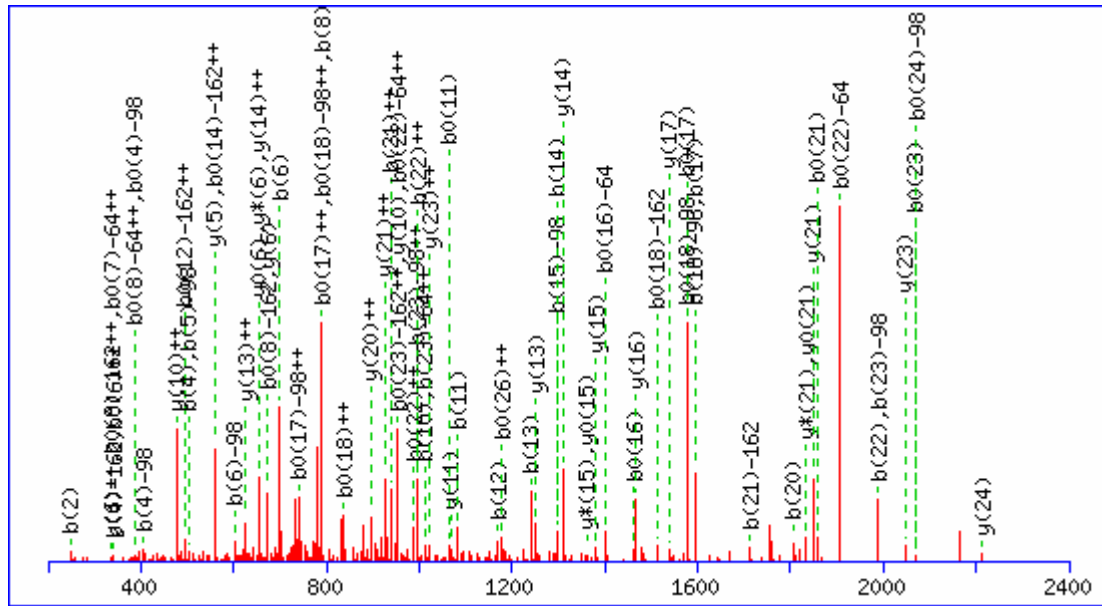

|                        |                                                |                        |                                                 |                         |                                                               |                         |                                                 |           |                                                 |
|------------------------|------------------------------------------------|------------------------|-------------------------------------------------|-------------------------|---------------------------------------------------------------|-------------------------|-------------------------------------------------|-----------|-------------------------------------------------|
| 88.0631 <sup>+2</sup>  | y <sub>1</sub> <sup>+2</sup>                   | 600.1735               | b <sub>5</sub>                                  | 925.4920 <sup>+2</sup>  | y <sub>21</sub> <sup>+2</sup>                                 | 1274.6093 <sup>+2</sup> | MH <sup>+2</sup>                                | 1849.9767 | y <sub>21</sub>                                 |
| 137.5973 <sup>+2</sup> | y <sub>2</sub> <sup>+2</sup>                   | 601.265                | b <sub>6</sub> -H <sub>3</sub> PO <sub>4</sub>  | 954.5367                | y <sub>10</sub>                                               | 1296.5889               | b <sub>15</sub> -H <sub>3</sub> PO <sub>4</sub> | 1876.8147 | b <sub>21</sub>                                 |
| 175.119                | y <sub>1</sub>                                 | 626.3564 <sup>+2</sup> | y <sub>13</sub> <sup>+2</sup>                   | 975.0262 <sup>+2</sup>  | y <sub>22</sub> <sup>+2</sup>                                 | 1297.513                | b <sub>14</sub>                                 | 1891.9218 | b <sub>22</sub> -H <sub>3</sub> PO <sub>4</sub> |
| 181.1133 <sup>+2</sup> | y <sub>3</sub> <sup>+2</sup>                   | 654.8672 <sup>+2</sup> | y <sub>14</sub> <sup>+2</sup>                   | 984.4455                | b <sub>11</sub> -H <sub>3</sub> PO <sub>4</sub>               | 1308.727                | y <sub>14</sub>                                 | 1949.0451 | y <sub>22</sub>                                 |
| 231.6372 <sup>+2</sup> | y <sub>4</sub> <sup>+2</sup>                   | 658.2865               | b <sub>7</sub> -H <sub>3</sub> PO <sub>4</sub>  | 1011.3853               | b <sub>10</sub>                                               | 1379.7641               | y <sub>15</sub>                                 | 1988.9746 | b <sub>23</sub> -H <sub>3</sub> PO <sub>4</sub> |
| 249.0904               | b <sub>2</sub>                                 | 672.4039               | y <sub>6</sub>                                  | 1023.5526 <sup>+2</sup> | y <sub>23</sub> <sup>+2</sup>                                 | 1383.6209               | b <sub>16</sub> -H <sub>3</sub> PO <sub>4</sub> | 1989.8987 | b <sub>22</sub>                                 |
| 274.1874               | y <sub>2</sub>                                 | 690.3857 <sup>+2</sup> | y <sub>15</sub> <sup>+2</sup>                   | 1058.0633 <sup>+2</sup> | y <sub>24</sub> -H <sub>3</sub> PO <sub>4</sub> <sup>+2</sup> | 1394.5658               | b <sub>15</sub>                                 | 2046.0978 | y <sub>23</sub>                                 |
| 280.1636 <sup>+2</sup> | y <sub>5</sub> <sup>+2</sup>                   | 699.2419               | b <sub>6</sub>                                  | 1067.6208               | y <sub>11</sub>                                               | 1466.7962               | y <sub>16</sub>                                 | 2086.9515 | b <sub>23</sub>                                 |
| 336.1224               | b <sub>3</sub>                                 | 733.9017 <sup>+2</sup> | y <sub>16</sub> <sup>+2</sup>                   | 1071.4775               | b <sub>12</sub> -H <sub>3</sub> PO <sub>4</sub>               | 1481.5978               | b <sub>16</sub>                                 | 2090.0223 | b <sub>24</sub> -H <sub>3</sub> PO <sub>4</sub> |
| 336.7056 <sup>+2</sup> | y <sub>6</sub> <sup>+2</sup>                   | 743.441                | y <sub>7</sub>                                  | 1082.4224               | b <sub>11</sub>                                               | 1496.705                | b <sub>17</sub> -H <sub>3</sub> PO <sub>4</sub> | 2115.1193 | y <sub>24</sub> -H <sub>3</sub> PO <sub>4</sub> |
| 361.2194               | y <sub>3</sub>                                 | 755.3393               | b <sub>8</sub> -H <sub>3</sub> PO <sub>4</sub>  | 1101.5793 <sup>+2</sup> | y <sub>25</sub> -H <sub>3</sub> PO <sub>4</sub> <sup>+2</sup> | 1537.8333               | y <sub>17</sub>                                 | 2177.0543 | b <sub>25</sub> -H <sub>3</sub> PO <sub>4</sub> |
| 372.2241 <sup>+2</sup> | y <sub>7</sub> <sup>+2</sup>                   | 756.2634               | b <sub>7</sub>                                  | 1107.0517 <sup>+2</sup> | y <sub>24</sub> <sup>+2</sup>                                 | 1593.7577               | b <sub>18</sub> -H <sub>3</sub> PO <sub>4</sub> | 2187.9992 | b <sub>24</sub>                                 |
| 400.7349 <sup>+2</sup> | y <sub>8</sub> <sup>+2</sup>                   | 769.4203 <sup>+2</sup> | y <sub>17</sub> <sup>+2</sup>                   | 1142.5146               | b <sub>13</sub> -H <sub>3</sub> PO <sub>4</sub>               | 1594.6819               | b <sub>17</sub>                                 | 2202.1513 | y <sub>25</sub> -H <sub>3</sub> PO <sub>4</sub> |
| 405.1438               | b <sub>4</sub> -H <sub>3</sub> PO <sub>4</sub> | 800.4625               | y <sub>8</sub>                                  | 1150.5677 <sup>+2</sup> | y <sub>25</sub> <sup>+2</sup>                                 | 1638.881                | y <sub>18</sub>                                 | 2213.0962 | y <sub>24</sub>                                 |
| 429.2456 <sup>+2</sup> | y <sub>9</sub> <sup>+2</sup>                   | 812.3607               | b <sub>9</sub> -H <sub>3</sub> PO <sub>4</sub>  | 1152.1031 <sup>+2</sup> | y <sub>26</sub> -H <sub>3</sub> PO <sub>4</sub> <sup>+2</sup> | 1650.7792               | b <sub>19</sub> -H <sub>3</sub> PO <sub>4</sub> | 2275.0312 | b <sub>25</sub>                                 |
| 462.2671               | y <sub>4</sub>                                 | 819.9441 <sup>+2</sup> | y <sub>18</sub> <sup>+2</sup>                   | 1154.6528               | y <sub>12</sub>                                               | 1691.7346               | b <sub>18</sub>                                 | 2276.1227 | b <sub>26</sub> -H <sub>3</sub> PO <sub>4</sub> |
| 477.7720 <sup>+2</sup> | y <sub>10</sub> <sup>+2</sup>                  | 848.4549 <sup>+2</sup> | y <sub>19</sub> <sup>+2</sup>                   | 1169.4544               | b <sub>12</sub>                                               | 1695.9024               | y <sub>19</sub>                                 | 2300.1282 | y <sub>25</sub>                                 |
| 502.1966               | b <sub>5</sub> -H <sub>3</sub> PO <sub>4</sub> | 853.3161               | b <sub>8</sub>                                  | 1199.5361               | b <sub>14</sub> -H <sub>3</sub> PO <sub>4</sub>               | 1707.8007               | b <sub>20</sub> -H <sub>3</sub> PO <sub>4</sub> | 2303.199  | y <sub>26</sub> -H <sub>3</sub> PO <sub>4</sub> |
| 503.1207               | b <sub>4</sub>                                 | 857.4839               | y <sub>9</sub>                                  | 1201.0916 <sup>+2</sup> | y <sub>26</sub> <sup>+2</sup>                                 | 1748.7561               | b <sub>19</sub>                                 | 2374.0996 | b <sub>26</sub>                                 |
| 534.3140 <sup>+2</sup> | y <sub>11</sub> <sup>+2</sup>                  | 896.9812 <sup>+2</sup> | y <sub>20</sub> <sup>+2</sup>                   | 1225.6208 <sup>+2</sup> | MH-H <sub>3</sub> PO <sub>4</sub> <sup>+2</sup>               | 1778.8378               | b <sub>21</sub> -H <sub>3</sub> PO <sub>4</sub> | 2401.1759 | y <sub>26</sub>                                 |
| 559.3198               | y <sub>5</sub>                                 | 910.3376               | b <sub>9</sub>                                  | 1240.4915               | b <sub>13</sub>                                               | 1792.9552               | y <sub>20</sub>                                 | 2450.2344 | MH-H <sub>3</sub> PO <sub>4</sub>               |
| 577.8300 <sup>+2</sup> | y <sub>12</sub> <sup>+2</sup>                  | 913.4084               | b <sub>10</sub> -H <sub>3</sub> PO <sub>4</sub> | 1251.7056               | y <sub>13</sub>                                               | 1805.7776               | b <sub>20</sub>                                 | 2548.2113 | MH                                              |

MS/MS Fragmentation of ATPVQLSPPCtSSPVVPSHPPVQQVK  
 Found in IPI00179071, Nuclear receptor coactivator 6

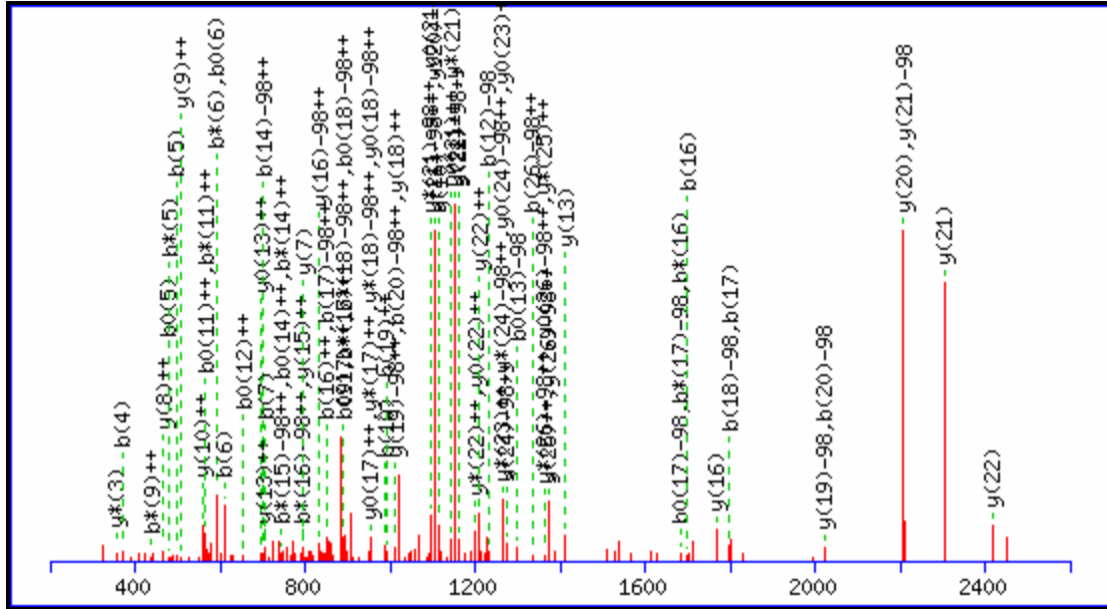

|                        |                               |                         |                                                               |                         |                                                               |           |                                                 |           |                                                 |
|------------------------|-------------------------------|-------------------------|---------------------------------------------------------------|-------------------------|---------------------------------------------------------------|-----------|-------------------------------------------------|-----------|-------------------------------------------------|
| 74.0600 <sup>+2</sup>  | y <sub>1</sub> <sup>+2</sup>  | 794.4407                | b <sub>8</sub>                                                | 1132.0988 <sup>+2</sup> | y <sub>22</sub> -H <sub>3</sub> PO <sub>4</sub> <sup>+2</sup> | 1445.7093 | b <sub>15</sub> -H <sub>3</sub> PO <sub>4</sub> | 2159.0954 | b <sub>22</sub> -H <sub>3</sub> PO <sub>4</sub> |
| 123.5942 <sup>+2</sup> | y <sub>2</sub> <sup>+2</sup>  | 795.4723                | y <sub>7</sub>                                                | 1174.5925               | b <sub>12</sub> -H <sub>3</sub> PO <sub>4</sub>               | 1446.6335 | b <sub>14</sub>                                 | 2160.0195 | b <sub>21</sub>                                 |
| 147.1128               | y <sub>1</sub>                | 834.9570 <sup>+2</sup>  | y <sub>16</sub> -H <sub>3</sub> PO <sub>4</sub> <sup>+2</sup> | 1178.5740 <sup>+2</sup> | b <sub>23</sub> <sup>+2</sup>                                 | 1498.8376 | y <sub>14</sub>                                 | 2248.0832 | y <sub>21</sub>                                 |
| 173.0921               | b <sub>2</sub>                | 883.9455 <sup>+2</sup>  | y <sub>16</sub> <sup>+2</sup>                                 | 1181.0873 <sup>+2</sup> | y <sub>22</sub> <sup>+2</sup>                                 | 1543.6862 | b <sub>15</sub>                                 | 2257.0723 | b <sub>22</sub>                                 |
| 187.6235 <sup>+2</sup> | y <sub>3</sub> <sup>+2</sup>  | 886.4616 <sup>+2</sup>  | y <sub>17</sub> -H <sub>3</sub> PO <sub>4</sub> <sup>+2</sup> | 1193.6148 <sup>+2</sup> | b <sub>24</sub> -H <sub>3</sub> PO <sub>4</sub> <sup>+2</sup> | 1544.7777 | b <sub>16</sub> -H <sub>3</sub> PO <sub>4</sub> | 2258.1638 | b <sub>23</sub> -H <sub>3</sub> PO <sub>4</sub> |
| 246.1812               | y <sub>2</sub>                | 891.4934                | b <sub>9</sub>                                                | 1196.1281 <sup>+2</sup> | y <sub>23</sub> -H <sub>3</sub> PO <sub>4</sub> <sup>+2</sup> | 1585.8697 | y <sub>15</sub>                                 | 2263.1903 | y <sub>22</sub> -H <sub>3</sub> PO <sub>4</sub> |
| 251.6528 <sup>+2</sup> | y <sub>4</sub> <sup>+2</sup>  | 932.5312                | y <sub>8</sub>                                                | 1215.6844               | y <sub>11</sub>                                               | 1642.7546 | b <sub>16</sub>                                 | 2356.1407 | b <sub>23</sub>                                 |
| 270.1448               | b <sub>3</sub>                | 934.9880 <sup>+2</sup>  | y <sub>18</sub> -H <sub>3</sub> PO <sub>4</sub> <sup>+2</sup> | 1242.6033 <sup>+2</sup> | b <sub>24</sub> <sup>+2</sup>                                 | 1643.8462 | b <sub>17</sub> -H <sub>3</sub> PO <sub>4</sub> | 2361.1672 | y <sub>22</sub>                                 |
| 301.1870 <sup>+2</sup> | y <sub>5</sub> <sup>+2</sup>  | 935.4501 <sup>+2</sup>  | y <sub>17</sub> <sup>+2</sup>                                 | 1245.1165 <sup>+2</sup> | y <sub>23</sub> <sup>+2</sup>                                 | 1668.9068 | y <sub>16</sub> -H <sub>3</sub> PO <sub>4</sub> | 2386.2224 | b <sub>24</sub> -H <sub>3</sub> PO <sub>4</sub> |
| 349.7134 <sup>+2</sup> | y <sub>6</sub> <sup>+2</sup>  | 982.9986 <sup>+2</sup>  | b <sub>20</sub> -H <sub>3</sub> PO <sub>4</sub> <sup>+2</sup> | 1245.6623 <sup>+2</sup> | y <sub>24</sub> -H <sub>3</sub> PO <sub>4</sub> <sup>+2</sup> | 1740.8989 | b <sub>18</sub> -H <sub>3</sub> PO <sub>4</sub> | 2391.2489 | y <sub>23</sub> -H <sub>3</sub> PO <sub>4</sub> |
| 369.2132               | b <sub>4</sub>                | 983.5144 <sup>+2</sup>  | y <sub>19</sub> -H <sub>3</sub> PO <sub>4</sub> <sup>+2</sup> | 1257.6441 <sup>+2</sup> | b <sub>25</sub> -H <sub>3</sub> PO <sub>4</sub> <sup>+2</sup> | 1741.823  | b <sub>17</sub>                                 | 2484.1993 | b <sub>24</sub>                                 |
| 374.2398               | y <sub>3</sub>                | 983.9765 <sup>+2</sup>  | y <sub>18</sub> <sup>+2</sup>                                 | 1261.6245               | b <sub>13</sub> -H <sub>3</sub> PO <sub>4</sub>               | 1766.8837 | y <sub>16</sub>                                 | 2489.2258 | y <sub>23</sub>                                 |
| 398.2398 <sup>+2</sup> | y <sub>7</sub> <sup>+2</sup>  | 988.5462                | b <sub>10</sub>                                               | 1272.5694               | b <sub>12</sub>                                               | 1771.916  | y <sub>17</sub> -H <sub>3</sub> PO <sub>4</sub> | 2490.3173 | y <sub>24</sub> -H <sub>3</sub> PO <sub>4</sub> |
| 466.7693 <sup>+2</sup> | y <sub>8</sub> <sup>+2</sup>  | 1019.5633               | y <sub>9</sub>                                                | 1294.1887 <sup>+2</sup> | y <sub>25</sub> -H <sub>3</sub> PO <sub>4</sub> <sup>+2</sup> | 1827.9309 | b <sub>19</sub> -H <sub>3</sub> PO <sub>4</sub> | 2514.281  | b <sub>25</sub> -H <sub>3</sub> PO <sub>4</sub> |
| 497.2718               | b <sub>5</sub>                | 1027.0304 <sup>+2</sup> | y <sub>20</sub> -H <sub>3</sub> PO <sub>4</sub> <sup>+2</sup> | 1294.6508 <sup>+2</sup> | y <sub>24</sub> <sup>+2</sup>                                 | 1838.8758 | b <sub>18</sub>                                 | 2587.3701 | y <sub>25</sub> -H <sub>3</sub> PO <sub>4</sub> |
| 502.2984               | y <sub>4</sub>                | 1031.5249 <sup>+2</sup> | b <sub>21</sub> -H <sub>3</sub> PO <sub>4</sub> <sup>+2</sup> | 1306.6326 <sup>+2</sup> | b <sub>25</sub> <sup>+2</sup>                                 | 1868.9687 | y <sub>18</sub> -H <sub>3</sub> PO <sub>4</sub> | 2588.2942 | y <sub>24</sub>                                 |
| 510.2853 <sup>+2</sup> | y <sub>9</sub> <sup>+2</sup>  | 1031.9870 <sup>+2</sup> | b <sub>20</sub> <sup>+2</sup>                                 | 1307.1783 <sup>+2</sup> | b <sub>26</sub> -H <sub>3</sub> PO <sub>4</sub> <sup>+2</sup> | 1869.8929 | y <sub>17</sub>                                 | 2612.2579 | b <sub>25</sub>                                 |
| 558.8116 <sup>+2</sup> | y <sub>10</sub> <sup>+2</sup> | 1032.5028 <sup>+2</sup> | y <sub>19</sub> <sup>+2</sup>                                 | 1314.7528               | y <sub>12</sub>                                               | 1925.9078 | b <sub>19</sub>                                 | 2613.3494 | b <sub>26</sub> -H <sub>3</sub> PO <sub>4</sub> |
| 601.3668               | y <sub>5</sub>                | 1075.5568 <sup>+2</sup> | y <sub>21</sub> -H <sub>3</sub> PO <sub>4</sub> <sup>+2</sup> | 1343.1771 <sup>+2</sup> | y <sub>25</sub> <sup>+2</sup>                                 | 1964.9899 | b <sub>20</sub> -H <sub>3</sub> PO <sub>4</sub> | 2685.347  | y <sub>25</sub>                                 |
| 608.3459 <sup>+2</sup> | y <sub>11</sub> <sup>+2</sup> | 1076.0188 <sup>+2</sup> | y <sub>20</sub> <sup>+2</sup>                                 | 1344.7125 <sup>+2</sup> | y <sub>26</sub> -H <sub>3</sub> PO <sub>4</sub> <sup>+2</sup> | 1966.0215 | y <sub>19</sub> -H <sub>3</sub> PO <sub>4</sub> | 2688.4178 | y <sub>26</sub> -H <sub>3</sub> PO <sub>4</sub> |
| 610.3559               | b <sub>6</sub>                | 1080.0513 <sup>+2</sup> | b <sub>22</sub> -H <sub>3</sub> PO <sub>4</sub> <sup>+2</sup> | 1348.6566               | b <sub>14</sub> -H <sub>3</sub> PO <sub>4</sub>               | 1966.9456 | y <sub>18</sub>                                 | 2711.3263 | b <sub>26</sub>                                 |
| 657.8801 <sup>+2</sup> | y <sub>12</sub> <sup>+2</sup> | 1080.5134 <sup>+2</sup> | b <sub>21</sub> <sup>+2</sup>                                 | 1356.1668 <sup>+2</sup> | b <sub>26</sub> <sup>+2</sup>                                 | 2053.0535 | y <sub>20</sub> -H <sub>3</sub> PO <sub>4</sub> | 2759.4549 | MH-H <sub>3</sub> PO <sub>4</sub>               |
| 698.4196               | y <sub>6</sub>                | 1091.5554               | b <sub>11</sub>                                               | 1359.6014               | b <sub>13</sub>                                               | 2062.0426 | b <sub>21</sub> -H <sub>3</sub> PO <sub>4</sub> | 2786.3947 | y <sub>26</sub>                                 |
| 706.4064 <sup>+2</sup> | y <sub>13</sub> <sup>+2</sup> | 1116.616                | y <sub>10</sub>                                               | 1380.2311 <sup>+2</sup> | MH-H <sub>3</sub> PO <sub>4</sub> <sup>+2</sup>               | 2062.9668 | b <sub>20</sub>                                 | 2857.4318 | MH                                              |
| 707.4087               | b <sub>7</sub>                | 1124.5452 <sup>+2</sup> | y <sub>21</sub> <sup>+2</sup>                                 | 1393.7010 <sup>+2</sup> | y <sub>26</sub> <sup>+2</sup>                                 | 2063.9984 | y <sub>19</sub>                                 |           |                                                 |
| 749.9225 <sup>+2</sup> | y <sub>14</sub> <sup>+2</sup> | 1129.0398 <sup>+2</sup> | b <sub>22</sub> <sup>+2</sup>                                 | 1411.8056               | y <sub>13</sub>                                               | 2150.1063 | y <sub>21</sub> -H <sub>3</sub> PO <sub>4</sub> |           |                                                 |
| 793.4385 <sup>+2</sup> | y <sub>15</sub> <sup>+2</sup> | 1129.5855 <sup>+2</sup> | b <sub>23</sub> -H <sub>3</sub> PO <sub>4</sub> <sup>+2</sup> | 1429.2195 <sup>+2</sup> | MH <sup>+2</sup>                                              | 2151.0304 | y <sub>20</sub>                                 |           |                                                 |

MS/MS Fragmentation of NLsGSTLYPVSNIPIR  
 Found in IPI00640136, regulatory factor X domain containing 2

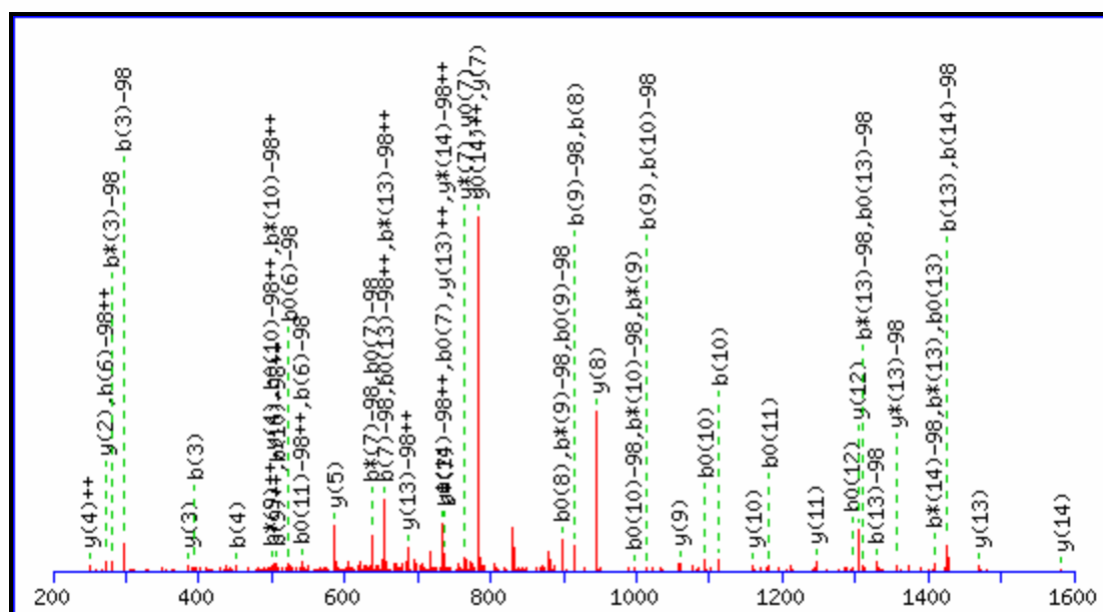

|                        |                                                |                        |                                                |                        |                                                               |           |                                                 |           |                                                 |
|------------------------|------------------------------------------------|------------------------|------------------------------------------------|------------------------|---------------------------------------------------------------|-----------|-------------------------------------------------|-----------|-------------------------------------------------|
| 88.0631 <sup>+2</sup>  | y <sub>1</sub> <sup>+2</sup>                   | 395.1326               | b <sub>3</sub>                                 | 655.341                | b <sub>7</sub> -H <sub>3</sub> PO <sub>4</sub>                | 945.5152  | y <sub>8</sub>                                  | 1372.7219 | y <sub>13</sub> -H <sub>3</sub> PO <sub>4</sub> |
| 136.5895 <sup>+2</sup> | y <sub>2</sub> <sup>+2</sup>                   | 441.2092               | b <sub>5</sub> -H <sub>3</sub> PO <sub>4</sub> | 685.3991               | y <sub>6</sub>                                                | 1013.434  | b <sub>9</sub>                                  | 1425.7373 | b <sub>14</sub> -H <sub>3</sub> PO <sub>4</sub> |
| 175.119                | y <sub>1</sub>                                 | 452.1541               | b <sub>4</sub>                                 | 686.8646 <sup>+2</sup> | y <sub>13</sub> -H <sub>3</sub> PO <sub>4</sub> <sup>+2</sup> | 1014.5255 | b <sub>10</sub> -H <sub>3</sub> PO <sub>4</sub> | 1426.6614 | b <sub>13</sub>                                 |
| 193.1315 <sup>+2</sup> | y <sub>3</sub> <sup>+2</sup>                   | 473.2613 <sup>+2</sup> | y <sub>8</sub> <sup>+2</sup>                   | 735.8531 <sup>+2</sup> | y <sub>13</sub> <sup>+2</sup>                                 | 1058.5993 | y <sub>9</sub>                                  | 1470.6988 | y <sub>13</sub>                                 |
| 228.1343               | b <sub>2</sub>                                 | 499.2987               | y <sub>4</sub>                                 | 743.4066 <sup>+2</sup> | y <sub>14</sub> -H <sub>3</sub> PO <sub>4</sub> <sup>+2</sup> | 1101.5575 | b <sub>11</sub> -H <sub>3</sub> PO <sub>4</sub> | 1485.806  | y <sub>14</sub> -H <sub>3</sub> PO <sub>4</sub> |
| 250.1530 <sup>+2</sup> | y <sub>4</sub> <sup>+2</sup>                   | 529.8033 <sup>+2</sup> | y <sub>9</sub> <sup>+2</sup>                   | 753.3179               | b <sub>7</sub>                                                | 1112.5024 | b <sub>10</sub>                                 | 1523.7142 | b <sub>14</sub>                                 |
| 272.1717               | y <sub>2</sub>                                 | 539.1861               | b <sub>5</sub>                                 | 782.4519               | y <sub>7</sub>                                                | 1159.647  | y <sub>10</sub>                                 | 1583.7829 | y <sub>14</sub>                                 |
| 293.6690 <sup>+2</sup> | y <sub>5</sub> <sup>+2</sup>                   | 542.2569               | b <sub>6</sub> -H <sub>3</sub> PO <sub>4</sub> | 792.3951 <sup>+2</sup> | y <sub>14</sub> <sup>+2</sup>                                 | 1199.5344 | b <sub>11</sub>                                 | 1599.8489 | MH-H <sub>3</sub> PO <sub>4</sub>               |
| 297.1557               | b <sub>3</sub> -H <sub>3</sub> PO <sub>4</sub> | 580.3271 <sup>+2</sup> | y <sub>10</sub> <sup>+2</sup>                  | 800.4281 <sup>+2</sup> | MH-H <sub>3</sub> PO <sub>4</sub> <sup>+2</sup>               | 1215.6004 | b <sub>12</sub> -H <sub>3</sub> PO <sub>4</sub> | 1697.8258 | MH                                              |
| 343.2032 <sup>+2</sup> | y <sub>6</sub> <sup>+2</sup>                   | 586.3307               | y <sub>5</sub>                                 | 818.4043               | b <sub>8</sub> -H <sub>3</sub> PO <sub>4</sub>                | 1246.679  | y <sub>11</sub>                                 |           |                                                 |
| 354.1772               | b <sub>4</sub> -H <sub>3</sub> PO <sub>4</sub> | 623.8431 <sup>+2</sup> | y <sub>11</sub> <sup>+2</sup>                  | 849.4166 <sup>+2</sup> | MH <sup>+2</sup>                                              | 1303.7005 | y <sub>12</sub>                                 |           |                                                 |
| 385.2558               | y <sub>3</sub>                                 | 640.2338               | b <sub>6</sub>                                 | 915.4571               | b <sub>0</sub> -H <sub>3</sub> PO <sub>4</sub>                | 1313.5773 | b <sub>12</sub>                                 |           |                                                 |
| 391.7296 <sup>+2</sup> | y <sub>7</sub> <sup>+2</sup>                   | 652.3539 <sup>+2</sup> | y <sub>12</sub> <sup>+2</sup>                  | 916.3812               | b <sub>8</sub>                                                | 1328.6845 | b <sub>13</sub> -H <sub>3</sub> PO <sub>4</sub> |           |                                                 |

MS/MS Fragmentation of AYsGSDLPSSSSGGANGTAGGGGAR  
 Found in IPI00293427, zinc finger/RING finger 2

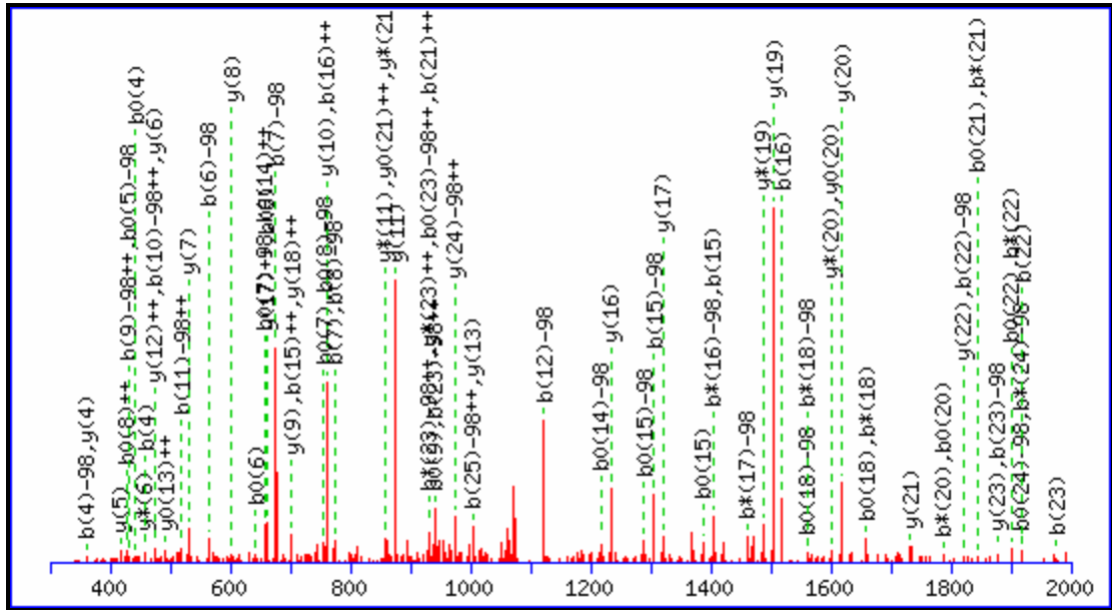

|                        |                                                |                        |                                                |                         |                                                               |           |                                                 |           |                                                 |
|------------------------|------------------------------------------------|------------------------|------------------------------------------------|-------------------------|---------------------------------------------------------------|-----------|-------------------------------------------------|-----------|-------------------------------------------------|
| 88.0631 <sup>+2</sup>  | y <sub>1</sub> <sup>+2</sup>                   | 459.1275               | b <sub>4</sub>                                 | 860.3785                | b <sub>9</sub> -H <sub>3</sub> PO <sub>4</sub>                | 1146.5246 | y <sub>15</sub>                                 | 1732.7845 | y <sub>21</sub>                                 |
| 123.5817 <sup>+2</sup> | y <sub>2</sub> <sup>+2</sup>                   | 473.2285 <sup>+2</sup> | y <sub>12</sub> <sup>+2</sup>                  | 866.8959 <sup>+2</sup>  | y <sub>21</sub> <sup>+2</sup>                                 | 1178.496  | b <sub>13</sub> -H <sub>3</sub> PO <sub>4</sub> | 1747.6807 | b <sub>19</sub>                                 |
| 152.0924 <sup>+2</sup> | y <sub>3</sub> <sup>+2</sup>                   | 474.2419               | y <sub>6</sub>                                 | 871.3233                | b <sub>8</sub>                                                | 1219.4515 | b <sub>12</sub>                                 | 1763.7467 | b <sub>21</sub> -H <sub>3</sub> PO <sub>4</sub> |
| 175.119                | y <sub>1</sub>                                 | 501.7392 <sup>+2</sup> | y <sub>13</sub> <sup>+2</sup>                  | 874.4126                | y <sub>11</sub>                                               | 1233.5567 | y <sub>16</sub>                                 | 1804.7021 | b <sub>20</sub>                                 |
| 180.6031 <sup>+2</sup> | y <sub>4</sub> <sup>+2</sup>                   | 530.2499 <sup>+2</sup> | y <sub>14</sub> <sup>+2</sup>                  | 910.4119 <sup>+2</sup>  | y <sub>22</sub> <sup>+2</sup>                                 | 1235.5175 | b <sub>14</sub> -H <sub>3</sub> PO <sub>4</sub> | 1819.8165 | y <sub>22</sub>                                 |
| 209.1139 <sup>+2</sup> | y <sub>5</sub> <sup>+2</sup>                   | 531.2634               | y <sub>7</sub>                                 | 938.9226 <sup>+2</sup>  | y <sub>23</sub> <sup>+2</sup>                                 | 1276.4729 | b <sub>13</sub>                                 | 1820.7682 | b <sub>22</sub> -H <sub>3</sub> PO <sub>4</sub> |
| 235.1077               | b <sub>2</sub>                                 | 546.1596               | b <sub>5</sub>                                 | 945.4497                | y <sub>12</sub>                                               | 1306.5546 | b <sub>15</sub> -H <sub>3</sub> PO <sub>4</sub> | 1861.7236 | b <sub>21</sub>                                 |
| 237.6246 <sup>+2</sup> | y <sub>6</sub> <sup>+2</sup>                   | 563.2096               | b <sub>6</sub> -H <sub>3</sub> PO <sub>4</sub> | 947.4105                | b <sub>10</sub> -H <sub>3</sub> PO <sub>4</sub>               | 1320.5887 | y <sub>17</sub>                                 | 1876.838  | y <sub>23</sub>                                 |
| 246.1561               | y <sub>2</sub>                                 | 573.7660 <sup>+2</sup> | y <sub>15</sub> <sup>+2</sup>                  | 958.3554                | b <sub>9</sub>                                                | 1333.4944 | b <sub>14</sub>                                 | 1877.7896 | b <sub>23</sub> -H <sub>3</sub> PO <sub>4</sub> |
| 266.1353 <sup>+2</sup> | y <sub>7</sub> <sup>+2</sup>                   | 602.3005               | y <sub>8</sub>                                 | 973.4334 <sup>+2</sup>  | y <sub>24</sub> -H <sub>3</sub> PO <sub>4</sub> <sup>+2</sup> | 1404.5315 | b <sub>15</sub>                                 | 1918.7451 | b <sub>22</sub>                                 |
| 301.6539 <sup>+2</sup> | y <sub>8</sub> <sup>+2</sup>                   | 617.2820 <sup>+2</sup> | y <sub>16</sub> <sup>+2</sup>                  | 1002.4711               | y <sub>13</sub>                                               | 1407.6207 | b <sub>18</sub>                                 | 1934.8111 | b <sub>24</sub> -H <sub>3</sub> PO <sub>4</sub> |
| 303.1775               | y <sub>3</sub>                                 | 660.7980 <sup>+2</sup> | y <sub>17</sub> <sup>+2</sup>                  | 1022.4218 <sup>+2</sup> | y <sub>24</sub> <sup>+2</sup>                                 | 1420.5975 | b <sub>16</sub> -H <sub>3</sub> PO <sub>4</sub> | 1945.8594 | y <sub>24</sub> -H <sub>3</sub> PO <sub>4</sub> |
| 304.1292               | b <sub>3</sub> -H <sub>3</sub> PO <sub>4</sub> | 661.1865               | b <sub>6</sub>                                 | 1034.4425               | b <sub>11</sub> -H <sub>3</sub> PO <sub>4</sub>               | 1477.619  | b <sub>17</sub> -H <sub>3</sub> PO <sub>4</sub> | 1975.7665 | b <sub>23</sub>                                 |
| 352.1777 <sup>+2</sup> | y <sub>9</sub> <sup>+2</sup>                   | 676.2937               | b <sub>7</sub> -H <sub>3</sub> PO <sub>4</sub> | 1045.3874               | b <sub>10</sub>                                               | 1504.6735 | y <sub>19</sub>                                 | 2005.8482 | b <sub>25</sub> -H <sub>3</sub> PO <sub>4</sub> |
| 360.199                | y <sub>4</sub>                                 | 703.3482               | y <sub>9</sub>                                 | 1054.9650 <sup>+2</sup> | y <sub>25</sub> -H <sub>3</sub> PO <sub>4</sub> <sup>+2</sup> | 1518.5744 | b <sub>16</sub>                                 | 2032.788  | b <sub>24</sub>                                 |
| 361.1506               | b <sub>4</sub> -H <sub>3</sub> PO <sub>4</sub> | 704.3140 <sup>+2</sup> | y <sub>18</sub> <sup>+2</sup>                  | 1059.4926               | y <sub>14</sub>                                               | 1575.5959 | b <sub>17</sub>                                 | 2043.8363 | y <sub>24</sub>                                 |
| 380.6885 <sup>+2</sup> | y <sub>10</sub> <sup>+2</sup>                  | 752.8404 <sup>+2</sup> | y <sub>19</sub> <sup>+2</sup>                  | 1090.4836 <sup>+2</sup> | MH-H <sub>3</sub> PO <sub>4</sub> <sup>+2</sup>               | 1578.6667 | b <sub>18</sub> -H <sub>3</sub> PO <sub>4</sub> | 2103.8251 | b <sub>25</sub>                                 |
| 402.1061               | b <sub>3</sub>                                 | 760.3696               | y <sub>10</sub>                                | 1103.9535 <sup>+2</sup> | y <sub>25</sub> <sup>+2</sup>                                 | 1617.7576 | y <sub>20</sub>                                 | 2108.9228 | y <sub>25</sub> -H <sub>3</sub> PO <sub>4</sub> |
| 417.2205               | y <sub>5</sub>                                 | 773.3464               | b <sub>8</sub> -H <sub>3</sub> PO <sub>4</sub> | 1121.4746               | b <sub>12</sub> -H <sub>3</sub> PO <sub>4</sub>               | 1649.7038 | b <sub>19</sub> -H <sub>3</sub> PO <sub>4</sub> | 2179.9599 | MH-H <sub>3</sub> PO <sub>4</sub>               |
| 437.7099 <sup>+2</sup> | y <sub>11</sub> <sup>+2</sup>                  | 774.2706               | b <sub>7</sub>                                 | 1132.4194               | b <sub>11</sub>                                               | 1676.6436 | b <sub>18</sub>                                 | 2206.8997 | y <sub>25</sub>                                 |
| 448.1827               | b <sub>5</sub> -H <sub>3</sub> PO <sub>4</sub> | 809.3824 <sup>+2</sup> | y <sub>20</sub> <sup>+2</sup>                  | 1139.4720 <sup>+2</sup> | MH <sup>+2</sup>                                              | 1706.7252 | b <sub>20</sub> -H <sub>3</sub> PO <sub>4</sub> | 2277.9368 | MH                                              |

MS/MS Fragmentation of FPAQVPSAHQPASGGAAAAAAPAAPAPR  
 Found in IPI00293427, zinc finger/RING finger 2

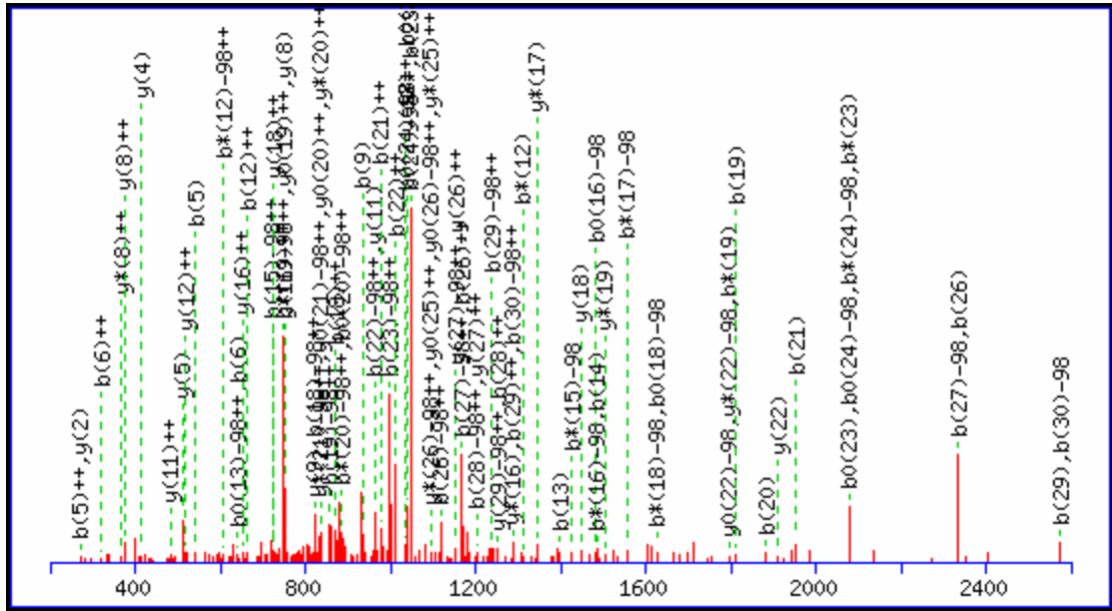

|                        |                                                               |                        |                                                               |                         |                                                               |                         |                                                               |           |                                                 |
|------------------------|---------------------------------------------------------------|------------------------|---------------------------------------------------------------|-------------------------|---------------------------------------------------------------|-------------------------|---------------------------------------------------------------|-----------|-------------------------------------------------|
| 88.0631 <sup>+2</sup>  | y <sub>1</sub> <sup>+2</sup>                                  | 694.3413 <sup>+2</sup> | b <sub>14</sub> -H <sub>3</sub> PO <sub>4</sub> <sup>+2</sup> | 1011.5168 <sup>+2</sup> | y <sub>24</sub> -H <sub>3</sub> PO <sub>4</sub> <sup>+2</sup> | 1301.1677 <sup>+2</sup> | y <sub>30</sub> -H <sub>3</sub> PO <sub>4</sub> <sup>+2</sup> | 1954.8807 | b <sub>21</sub>                                 |
| 136.5895 <sup>+2</sup> | y <sub>2</sub> <sup>+2</sup>                                  | 699.8137 <sup>+2</sup> | b <sub>13</sub> <sup>+2</sup>                                 | 1013.4626 <sup>+2</sup> | b <sub>22</sub> <sup>+2</sup>                                 | 1301.6297 <sup>+2</sup> | y <sub>29</sub> <sup>+2</sup>                                 | 1998.978  | b <sub>23</sub> -H <sub>3</sub> PO <sub>4</sub> |
| 172.1081 <sup>+2</sup> | y <sub>3</sub> <sup>+2</sup>                                  | 722.8520 <sup>+2</sup> | b <sub>15</sub> -H <sub>3</sub> PO <sub>4</sub> <sup>+2</sup> | 1024.9867 <sup>+2</sup> | y <sub>23</sub> <sup>+2</sup>                                 | 1304.707                | y <sub>16</sub>                                               | 2022.0264 | y <sub>24</sub> -H <sub>3</sub> PO <sub>4</sub> |
| 175.119                | y <sub>1</sub>                                                | 724.8839 <sup>+2</sup> | y <sub>18</sub> <sup>+2</sup>                                 | 1034.5742               | y <sub>12</sub>                                               | 1327.5831               | b <sub>12</sub>                                               | 2025.9178 | b <sub>22</sub>                                 |
| 207.6266 <sup>+2</sup> | y <sub>4</sub> <sup>+2</sup>                                  | 727.3774               | b <sub>7</sub>                                                | 1048.5190 <sup>+2</sup> | b <sub>24</sub> -H <sub>3</sub> PO <sub>4</sub> <sup>+2</sup> | 1336.6345 <sup>+2</sup> | b <sub>30</sub> <sup>+2</sup>                                 | 2048.9662 | y <sub>23</sub>                                 |
| 245.1285               | b <sub>2</sub>                                                | 743.3297 <sup>+2</sup> | b <sub>14</sub> <sup>+2</sup>                                 | 1048.9811 <sup>+2</sup> | b <sub>23</sub> <sup>+2</sup>                                 | 1350.1561 <sup>+2</sup> | y <sub>30</sub> <sup>+2</sup>                                 | 2096.0308 | b <sub>24</sub> -H <sub>3</sub> PO <sub>4</sub> |
| 256.1530 <sup>+2</sup> | y <sub>5</sub> <sup>+2</sup>                                  | 750.4257               | y <sub>8</sub>                                                | 1055.0329 <sup>+2</sup> | y <sub>25</sub> -H <sub>3</sub> PO <sub>4</sub> <sup>+2</sup> | 1361.7284               | y <sub>17</sub>                                               | 2096.9549 | b <sub>23</sub>                                 |
| 272.1717               | y <sub>2</sub>                                                | 751.3628 <sup>+2</sup> | b <sub>16</sub> -H <sub>3</sub> PO <sub>4</sub> <sup>+2</sup> | 1060.5053 <sup>+2</sup> | y <sub>24</sub> <sup>+2</sup>                                 | 1374.7019 <sup>+2</sup> | MH-H <sub>3</sub> PO <sub>4</sub> <sup>+2</sup>               | 2109.0584 | y <sub>25</sub> -H <sub>3</sub> PO <sub>4</sub> |
| 291.6715 <sup>+2</sup> | y <sub>6</sub> <sup>+2</sup>                                  | 760.4024 <sup>+2</sup> | y <sub>19</sub> <sup>+2</sup>                                 | 1063.532                | b <sub>10</sub>                                               | 1387.6753               | b <sub>14</sub> -H <sub>3</sub> PO <sub>4</sub>               | 2120.0033 | y <sub>24</sub>                                 |
| 316.1656               | b <sub>3</sub>                                                | 771.8405 <sup>+2</sup> | b <sub>15</sub> <sup>+2</sup>                                 | 1084.0376 <sup>+2</sup> | b <sub>25</sub> -H <sub>3</sub> PO <sub>4</sub> <sup>+2</sup> | 1398.6202               | b <sub>13</sub>                                               | 2167.0679 | b <sub>25</sub> -H <sub>3</sub> PO <sub>4</sub> |
| 327.1901 <sup>+2</sup> | y <sub>7</sub> <sup>+2</sup>                                  | 786.8813 <sup>+2</sup> | b <sub>17</sub> -H <sub>3</sub> PO <sub>4</sub> <sup>+2</sup> | 1097.5075 <sup>+2</sup> | b <sub>24</sub> <sup>+2</sup>                                 | 1423.6903 <sup>+2</sup> | MH <sup>+2</sup>                                              | 2194.0077 | b <sub>24</sub>                                 |
| 343.2088               | y <sub>3</sub>                                                | 794.9132 <sup>+2</sup> | y <sub>20</sub> -H <sub>3</sub> PO <sub>4</sub> <sup>+2</sup> | 1103.5592 <sup>+2</sup> | y <sub>26</sub> -H <sub>3</sub> PO <sub>4</sub> <sup>+2</sup> | 1444.6968               | b <sub>15</sub> -H <sub>3</sub> PO <sub>4</sub>               | 2206.1112 | y <sub>26</sub> -H <sub>3</sub> PO <sub>4</sub> |
| 375.7165 <sup>+2</sup> | y <sub>8</sub> <sup>+2</sup>                                  | 798.4145               | b <sub>8</sub>                                                | 1104.0213 <sup>+2</sup> | y <sub>25</sub> <sup>+2</sup>                                 | 1448.7605               | y <sub>18</sub>                                               | 2207.0353 | y <sub>25</sub>                                 |
| 411.2350 <sup>+2</sup> | y <sub>9</sub> <sup>+2</sup>                                  | 800.3512 <sup>+2</sup> | b <sub>16</sub> <sup>+2</sup>                                 | 1105.6113               | y <sub>13</sub>                                               | 1485.6522               | b <sub>14</sub>                                               | 2238.105  | b <sub>26</sub> -H <sub>3</sub> PO <sub>4</sub> |
| 414.2459               | y <sub>4</sub>                                                | 821.4628               | y <sub>9</sub>                                                | 1119.5562 <sup>+2</sup> | b <sub>26</sub> -H <sub>3</sub> PO <sub>4</sub> <sup>+2</sup> | 1501.7183               | b <sub>16</sub> -H <sub>3</sub> PO <sub>4</sub>               | 2265.0448 | b <sub>25</sub>                                 |
| 444.2241               | b <sub>4</sub>                                                | 822.3999 <sup>+2</sup> | b <sub>18</sub> -H <sub>3</sub> PO <sub>4</sub> <sup>+2</sup> | 1133.0260 <sup>+2</sup> | b <sub>25</sub> <sup>+2</sup>                                 | 1519.7976               | y <sub>19</sub>                                               | 2304.0881 | y <sub>26</sub>                                 |
| 446.7536 <sup>+2</sup> | y <sub>10</sub> <sup>+2</sup>                                 | 835.8698 <sup>+2</sup> | b <sub>17</sub> <sup>+2</sup>                                 | 1152.5477 <sup>+2</sup> | y <sub>26</sub> <sup>+2</sup>                                 | 1542.6737               | b <sub>15</sub>                                               | 2305.1796 | y <sub>27</sub> -H <sub>3</sub> PO <sub>4</sub> |
| 468.2403 <sup>+2</sup> | b <sub>9</sub> <sup>+2</sup>                                  | 843.4395 <sup>+2</sup> | y <sub>21</sub> -H <sub>3</sub> PO <sub>4</sub> <sup>+2</sup> | 1153.0934 <sup>+2</sup> | y <sub>27</sub> -H <sub>3</sub> PO <sub>4</sub> <sup>+2</sup> | 1572.7554               | b <sub>17</sub> -H <sub>3</sub> PO <sub>4</sub>               | 2335.1578 | b <sub>27</sub> -H <sub>3</sub> PO <sub>4</sub> |
| 482.2722 <sup>+2</sup> | y <sub>11</sub> <sup>+2</sup>                                 | 843.9016 <sup>+2</sup> | y <sub>20</sub> <sup>+2</sup>                                 | 1160.5847               | b <sub>11</sub>                                               | 1588.819                | y <sub>20</sub> -H <sub>3</sub> PO <sub>4</sub>               | 2336.0819 | b <sub>26</sub>                                 |
| 511.2987               | y <sub>5</sub>                                                | 857.9184 <sup>+2</sup> | b <sub>19</sub> -H <sub>3</sub> PO <sub>4</sub> <sup>+2</sup> | 1168.0825 <sup>+2</sup> | b <sub>27</sub> -H <sub>3</sub> PO <sub>4</sub> <sup>+2</sup> | 1599.6951               | b <sub>16</sub>                                               | 2403.1565 | y <sub>27</sub>                                 |
| 517.7907 <sup>+2</sup> | y <sub>12</sub> <sup>+2</sup>                                 | 871.3883 <sup>+2</sup> | b <sub>18</sub> <sup>+2</sup>                                 | 1168.5446 <sup>+2</sup> | b <sub>26</sub> <sup>+2</sup>                                 | 1643.7925               | b <sub>18</sub> -H <sub>3</sub> PO <sub>4</sub>               | 2406.1949 | b <sub>28</sub> -H <sub>3</sub> PO <sub>4</sub> |
| 532.2696 <sup>+2</sup> | b <sub>10</sub> <sup>+2</sup>                                 | 892.4280 <sup>+2</sup> | y <sub>21</sub> <sup>+2</sup>                                 | 1176.6484               | y <sub>14</sub>                                               | 1670.7323               | b <sub>17</sub>                                               | 2433.1347 | b <sub>27</sub>                                 |
| 543.2926               | b <sub>5</sub>                                                | 892.4999               | y <sub>10</sub>                                               | 1202.0819 <sup>+2</sup> | y <sub>27</sub> <sup>+2</sup>                                 | 1685.8718               | y <sub>21</sub> -H <sub>3</sub> PO <sub>4</sub>               | 2433.2382 | y <sub>28</sub> -H <sub>3</sub> PO <sub>4</sub> |
| 553.3093 <sup>+2</sup> | y <sub>13</sub> <sup>+2</sup>                                 | 893.4370 <sup>+2</sup> | b <sub>20</sub> -H <sub>3</sub> PO <sub>4</sub> <sup>+2</sup> | 1203.6011 <sup>+2</sup> | b <sub>28</sub> -H <sub>3</sub> PO <sub>4</sub> <sup>+2</sup> | 1686.7959               | y <sub>20</sub>                                               | 2477.232  | b <sub>29</sub> -H <sub>3</sub> PO <sub>4</sub> |
| 580.7960 <sup>+2</sup> | b <sub>11</sub> <sup>+2</sup>                                 | 906.9069 <sup>+2</sup> | b <sub>19</sub> <sup>+2</sup>                                 | 1217.0710 <sup>+2</sup> | b <sub>27</sub> <sup>+2</sup>                                 | 1714.8296               | b <sub>19</sub> -H <sub>3</sub> PO <sub>4</sub>               | 2504.1718 | b <sub>28</sub>                                 |
| 582.3358               | y <sub>6</sub>                                                | 907.4688 <sup>+2</sup> | y <sub>22</sub> -H <sub>3</sub> PO <sub>4</sub> <sup>+2</sup> | 1217.1227 <sup>+2</sup> | y <sub>28</sub> -H <sub>3</sub> PO <sub>4</sub> <sup>+2</sup> | 1741.7694               | b <sub>18</sub>                                               | 2504.2753 | y <sub>29</sub> -H <sub>3</sub> PO <sub>4</sub> |
| 588.8278 <sup>+2</sup> | y <sub>14</sub> <sup>+2</sup>                                 | 928.9555 <sup>+2</sup> | b <sub>21</sub> -H <sub>3</sub> PO <sub>4</sub> <sup>+2</sup> | 1229.6062               | b <sub>12</sub> -H <sub>3</sub> PO <sub>4</sub>               | 1783.8487               | y <sub>21</sub>                                               | 2531.2151 | y <sub>28</sub>                                 |
| 615.3067 <sup>+2</sup> | b <sub>12</sub> -H <sub>3</sub> PO <sub>4</sub> <sup>+2</sup> | 935.4734               | b <sub>9</sub>                                                | 1239.1197 <sup>+2</sup> | b <sub>29</sub> -H <sub>3</sub> PO <sub>4</sub> <sup>+2</sup> | 1785.8667               | b <sub>20</sub> -H <sub>3</sub> PO <sub>4</sub>               | 2574.2848 | b <sub>30</sub> -H <sub>3</sub> PO <sub>4</sub> |
| 624.3464 <sup>+2</sup> | y <sub>15</sub> <sup>+2</sup>                                 | 942.4254 <sup>+2</sup> | b <sub>20</sub> <sup>+2</sup>                                 | 1247.6855               | y <sub>15</sub>                                               | 1812.8065               | b <sub>19</sub>                                               | 2575.2089 | b <sub>29</sub>                                 |
| 640.3453               | b <sub>6</sub>                                                | 956.4573 <sup>+2</sup> | y <sub>22</sub> <sup>+2</sup>                                 | 1252.5895 <sup>+2</sup> | b <sub>28</sub> <sup>+2</sup>                                 | 1813.9304               | y <sub>22</sub> -H <sub>3</sub> PO <sub>4</sub>               | 2601.3281 | y <sub>30</sub> -H <sub>3</sub> PO <sub>4</sub> |
| 650.8253 <sup>+2</sup> | b <sub>13</sub> -H <sub>3</sub> PO <sub>4</sub> <sup>+2</sup> | 963.537                | y <sub>11</sub>                                               | 1252.6413 <sup>+2</sup> | y <sub>29</sub> -H <sub>3</sub> PO <sub>4</sub> <sup>+2</sup> | 1856.9038               | b <sub>21</sub> -H <sub>3</sub> PO <sub>4</sub>               | 2602.2522 | y <sub>29</sub>                                 |
| 652.8571 <sup>+2</sup> | y <sub>16</sub> <sup>+2</sup>                                 | 964.4741 <sup>+2</sup> | b <sub>22</sub> -H <sub>3</sub> PO <sub>4</sub> <sup>+2</sup> | 1266.1112 <sup>+2</sup> | y <sub>28</sub> <sup>+2</sup>                                 | 1883.8436               | b <sub>20</sub>                                               | 2672.2617 | b <sub>30</sub>                                 |
| 653.3729               | y <sub>7</sub>                                                | 975.9983 <sup>+2</sup> | y <sub>23</sub> -H <sub>3</sub> PO <sub>4</sub> <sup>+2</sup> | 1287.6460 <sup>+2</sup> | b <sub>30</sub> -H <sub>3</sub> PO <sub>4</sub> <sup>+2</sup> | 1911.9073               | y <sub>22</sub>                                               | 2699.305  | y <sub>30</sub>                                 |
| 664.2952 <sup>+2</sup> | b <sub>12</sub> <sup>+2</sup>                                 | 977.9440 <sup>+2</sup> | b <sub>21</sub> <sup>+2</sup>                                 | 1288.1081 <sup>+2</sup> | b <sub>29</sub> <sup>+2</sup>                                 | 1927.9409               | b <sub>22</sub> -H <sub>3</sub> PO <sub>4</sub>               | 2748.3965 | MH-H <sub>3</sub> PO <sub>4</sub>               |
| 681.3678 <sup>+2</sup> | y <sub>17</sub> <sup>+2</sup>                                 | 999.9927 <sup>+2</sup> | b <sub>23</sub> -H <sub>3</sub> PO <sub>4</sub> <sup>+2</sup> | 1300.6433               | b <sub>13</sub> -H <sub>3</sub> PO <sub>4</sub>               | 1950.9893               | y <sub>23</sub> -H <sub>3</sub> PO <sub>4</sub>               | 2846.3734 | MH                                              |

MS/MS Fragmentation of RNsFTPLSSNTIR  
 Found in IPI00305589, Isoform 1 of 6-phosphofructo-2-kinase/fructose-2,6-biphosphatase 2

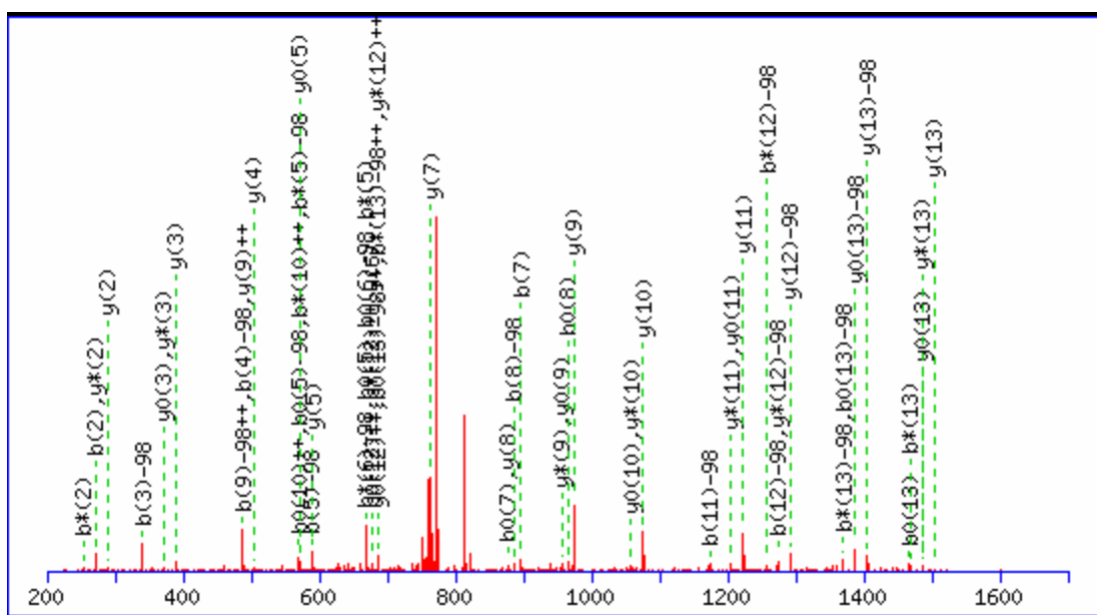

|                        |                                                              |                        |                                                               |                        |                                                               |                        |                                                               |           |                                                 |
|------------------------|--------------------------------------------------------------|------------------------|---------------------------------------------------------------|------------------------|---------------------------------------------------------------|------------------------|---------------------------------------------------------------|-----------|-------------------------------------------------|
| 88.0631 <sup>+2</sup>  | y <sub>1</sub> <sup>+2</sup>                                 | 343.1745 <sup>+2</sup> | b <sub>6</sub> -H <sub>3</sub> PO <sub>4</sub> <sup>+2</sup>  | 535.7370 <sup>+2</sup> | b <sub>9</sub> <sup>+2</sup>                                  | 695.3241 <sup>+2</sup> | y <sub>12</sub> <sup>+2</sup>                                 | 1070.4667 | b <sub>9</sub>                                  |
| 136.0793 <sup>+2</sup> | b <sub>2</sub> <sup>+2</sup>                                 | 343.6365 <sup>+2</sup> | b <sub>5</sub> <sup>+2</sup>                                  | 538.2907 <sup>+2</sup> | y <sub>10</sub> <sup>+2</sup>                                 | 703.3571 <sup>+2</sup> | y <sub>13</sub> -H <sub>3</sub> PO <sub>4</sub> <sup>+2</sup> | 1075.5742 | y <sub>10</sub>                                 |
| 144.6051 <sup>+2</sup> | y <sub>2</sub> <sup>+2</sup>                                 | 382.6985 <sup>+2</sup> | y <sub>7</sub> <sup>+2</sup>                                  | 579.2530 <sup>+2</sup> | b <sub>10</sub> <sup>+2</sup>                                 | 743.3403 <sup>+2</sup> | b <sub>13</sub> <sup>+2</sup>                                 | 1157.4987 | b <sub>10</sub>                                 |
| 170.5900 <sup>+2</sup> | b <sub>3</sub> -H <sub>3</sub> PO <sub>4</sub> <sup>+2</sup> | 389.2507               | y <sub>3</sub>                                                | 585.2181               | b <sub>4</sub>                                                | 752.3456 <sup>+2</sup> | y <sub>13</sub> <sup>+2</sup>                                 | 1173.5647 | b <sub>11</sub> -H <sub>3</sub> PO <sub>4</sub> |
| 175.119                | y <sub>1</sub>                                               | 392.1629 <sup>+2</sup> | b <sub>6</sub> <sup>+2</sup>                                  | 587.2860 <sup>+2</sup> | b <sub>11</sub> -H <sub>3</sub> PO <sub>4</sub> <sup>+2</sup> | 764.3897               | y <sub>7</sub>                                                | 1222.6426 | y <sub>11</sub>                                 |
| 195.1290 <sup>+2</sup> | y <sub>3</sub> <sup>+2</sup>                                 | 399.7165 <sup>+2</sup> | b <sub>7</sub> -H <sub>3</sub> PO <sub>4</sub> <sup>+2</sup>  | 588.2889               | b <sub>5</sub> -H <sub>3</sub> PO <sub>4</sub>                | 781.4077 <sup>+2</sup> | MH-H <sub>3</sub> PO <sub>4</sub> <sup>+2</sup>               | 1271.5416 | b <sub>11</sub>                                 |
| 219.5785 <sup>+2</sup> | b <sub>3</sub> <sup>+2</sup>                                 | 438.1497               | b <sub>3</sub>                                                | 590.3257               | y <sub>5</sub>                                                | 783.3185               | b <sub>6</sub>                                                | 1274.6124 | b <sub>12</sub> -H <sub>3</sub> PO <sub>4</sub> |
| 244.1242 <sup>+2</sup> | b <sub>4</sub> -H <sub>3</sub> PO <sub>4</sub> <sup>+2</sup> | 439.2405 <sup>+2</sup> | y <sub>8</sub> <sup>+2</sup>                                  | 611.8250 <sup>+2</sup> | y <sub>11</sub> <sup>+2</sup>                                 | 798.4257               | b <sub>7</sub> -H <sub>3</sub> PO <sub>4</sub>                | 1291.6641 | y <sub>12</sub> -H <sub>3</sub> PO <sub>4</sub> |
| 252.1504 <sup>+2</sup> | y <sub>4</sub> <sup>+2</sup>                                 | 443.2325 <sup>+2</sup> | b <sub>8</sub> -H <sub>3</sub> PO <sub>4</sub> <sup>+2</sup>  | 636.2744 <sup>+2</sup> | b <sub>11</sub> <sup>+2</sup>                                 | 830.3962 <sup>+2</sup> | MH <sup>+2</sup>                                              | 1372.5893 | b <sub>12</sub>                                 |
| 271.1513               | b <sub>2</sub>                                               | 448.7049 <sup>+2</sup> | b <sub>7</sub> <sup>+2</sup>                                  | 637.8098 <sup>+2</sup> | b <sub>12</sub> -H <sub>3</sub> PO <sub>4</sub> <sup>+2</sup> | 877.4738               | y <sub>8</sub>                                                | 1387.6965 | b <sub>13</sub> -H <sub>3</sub> PO <sub>4</sub> |
| 288.203                | y <sub>2</sub>                                               | 486.7485 <sup>+2</sup> | b <sub>9</sub> -H <sub>3</sub> PO <sub>4</sub> <sup>+2</sup>  | 646.3357 <sup>+2</sup> | y <sub>12</sub> -H <sub>3</sub> PO <sub>4</sub> <sup>+2</sup> | 885.4577               | b <sub>8</sub> -H <sub>3</sub> PO <sub>4</sub>                | 1389.641  | y <sub>12</sub>                                 |
| 293.1127 <sup>+2</sup> | b <sub>4</sub> <sup>+2</sup>                                 | 487.2412               | b <sub>4</sub> -H <sub>3</sub> PO <sub>4</sub>                | 677.3577               | y <sub>6</sub>                                                | 896.4026               | b <sub>7</sub>                                                | 1405.707  | y <sub>13</sub> -H <sub>3</sub> PO <sub>4</sub> |
| 294.6481 <sup>+2</sup> | b <sub>5</sub> -H <sub>3</sub> PO <sub>4</sub> <sup>+2</sup> | 487.7669 <sup>+2</sup> | y <sub>9</sub> <sup>+2</sup>                                  | 685.3416               | b <sub>6</sub> -H <sub>3</sub> PO <sub>4</sub>                | 972.4898               | b <sub>9</sub> -H <sub>3</sub> PO <sub>4</sub>                | 1485.6733 | b <sub>13</sub>                                 |
| 295.6665 <sup>+2</sup> | y <sub>5</sub> <sup>+2</sup>                                 | 492.2209 <sup>+2</sup> | b <sub>8</sub> <sup>+2</sup>                                  | 686.2658               | b <sub>5</sub>                                                | 974.5265               | y <sub>9</sub>                                                | 1503.6839 | y <sub>13</sub>                                 |
| 339.1825 <sup>+2</sup> | y <sub>6</sub> <sup>+2</sup>                                 | 503.2936               | y <sub>4</sub>                                                | 686.7983 <sup>+2</sup> | b <sub>12</sub> <sup>+2</sup>                                 | 983.4346               | b <sub>8</sub>                                                | 1561.8081 | MH-H <sub>3</sub> PO <sub>4</sub>               |
| 340.1728               | b <sub>3</sub> -H <sub>3</sub> PO <sub>4</sub>               | 530.2645 <sup>+2</sup> | b <sub>10</sub> -H <sub>3</sub> PO <sub>4</sub> <sup>+2</sup> | 694.3519 <sup>+2</sup> | b <sub>13</sub> -H <sub>3</sub> PO <sub>4</sub> <sup>+2</sup> | 1059.5218              | b <sub>10</sub> -H <sub>3</sub> PO <sub>4</sub>               | 1659.785  | MH                                              |

MS/MS Fragmentation of NYSVGSRPLKPLsPLR  
 Found in IPI00305589, Isoform 1 of 6-phosphofructo-2-kinase/fructose-2,6-biphosphatase 2

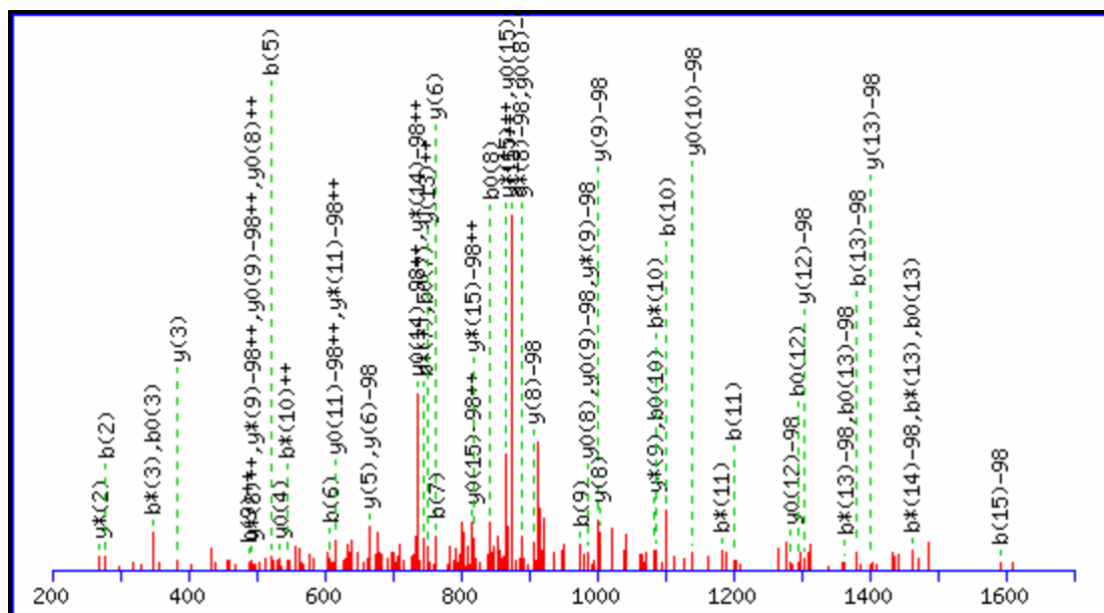

|                        |                                                              |                        |                                                               |                        |                                                               |                        |                                                 |           |                                                 |
|------------------------|--------------------------------------------------------------|------------------------|---------------------------------------------------------------|------------------------|---------------------------------------------------------------|------------------------|-------------------------------------------------|-----------|-------------------------------------------------|
| 88.0631 <sup>+2</sup>  | y <sub>1</sub> <sup>+2</sup>                                 | 453.3002 <sup>+2</sup> | y <sub>8</sub> -H <sub>3</sub> PO <sub>4</sub> <sup>+2</sup>  | 664.4141               | y <sub>6</sub> -H <sub>3</sub> PO <sub>4</sub>                | 861.4213               | b <sub>8</sub>                                  | 1381.7587 | b <sub>13</sub> -H <sub>3</sub> PO <sub>4</sub> |
| 144.6051 <sup>+2</sup> | y <sub>2</sub> <sup>+2</sup>                                 | 454.2772               | y <sub>4</sub> -H <sub>3</sub> PO <sub>4</sub>                | 665.3382               | y <sub>5</sub>                                                | 875.4742 <sup>+2</sup> | y <sub>15</sub> <sup>+2</sup>                   | 1400.7774 | y <sub>12</sub>                                 |
| 175.119                | y <sub>1</sub>                                               | 464.214                | b <sub>4</sub>                                                | 672.3816 <sup>+2</sup> | y <sub>11</sub> <sup>+2</sup>                                 | 883.5072 <sup>+2</sup> | MH-H <sub>3</sub> PO <sub>4</sub> <sup>+2</sup> | 1401.8689 | y <sub>13</sub> -H <sub>3</sub> PO <sub>4</sub> |
| 193.1315 <sup>+2</sup> | y <sub>3</sub> <sup>+2</sup>                                 | 487.7563 <sup>+2</sup> | b <sub>9</sub> <sup>+2</sup>                                  | 691.3830 <sup>+2</sup> | b <sub>13</sub> -H <sub>3</sub> PO <sub>4</sub> <sup>+2</sup> | 890.4859               | y <sub>7</sub>                                  | 1478.8114 | b <sub>14</sub> -H <sub>3</sub> PO <sub>4</sub> |
| 227.6423 <sup>+2</sup> | y <sub>4</sub> -H <sub>3</sub> PO <sub>4</sub> <sup>+2</sup> | 501.8266 <sup>+2</sup> | y <sub>9</sub> -H <sub>3</sub> PO <sub>4</sub> <sup>+2</sup>  | 700.8923 <sup>+2</sup> | y <sub>12</sub> <sup>+2</sup>                                 | 905.5931               | y <sub>8</sub> -H <sub>3</sub> PO <sub>4</sub>  | 1479.7356 | b <sub>13</sub>                                 |
| 276.6307 <sup>+2</sup> | y <sub>4</sub> <sup>+2</sup>                                 | 502.2886 <sup>+2</sup> | y <sub>8</sub> <sup>+2</sup>                                  | 701.4381 <sup>+2</sup> | y <sub>13</sub> -H <sub>3</sub> PO <sub>4</sub> <sup>+2</sup> | 932.4957 <sup>+2</sup> | MH <sup>+2</sup>                                | 1488.9009 | y <sub>14</sub> -H <sub>3</sub> PO <sub>4</sub> |
| 278.1135               | b <sub>2</sub>                                               | 521.2354               | b <sub>5</sub>                                                | 739.9094 <sup>+2</sup> | b <sub>14</sub> -H <sub>3</sub> PO <sub>4</sub> <sup>+2</sup> | 974.5054               | b <sub>9</sub>                                  | 1499.8458 | y <sub>13</sub>                                 |
| 284.1843 <sup>+2</sup> | y <sub>5</sub> -H <sub>3</sub> PO <sub>4</sub> <sup>+2</sup> | 550.8150 <sup>+2</sup> | y <sub>9</sub> <sup>+2</sup>                                  | 740.3714 <sup>+2</sup> | b <sub>13</sub> <sup>+2</sup>                                 | 1002.6459              | y <sub>9</sub> -H <sub>3</sub> PO <sub>4</sub>  | 1576.7883 | b <sub>14</sub>                                 |
| 288.203                | y <sub>2</sub>                                               | 551.8038 <sup>+2</sup> | b <sub>10</sub> <sup>+2</sup>                                 | 744.9541 <sup>+2</sup> | y <sub>14</sub> -H <sub>3</sub> PO <sub>4</sub> <sup>+2</sup> | 1003.57                | y <sub>8</sub>                                  | 1586.8778 | y <sub>14</sub>                                 |
| 332.7107 <sup>+2</sup> | y <sub>6</sub> -H <sub>3</sub> PO <sub>4</sub> <sup>+2</sup> | 552.2541               | y <sub>4</sub>                                                | 750.4265 <sup>+2</sup> | y <sub>13</sub> <sup>+2</sup>                                 | 1100.6228              | y <sub>9</sub>                                  | 1591.8955 | b <sub>15</sub> -H <sub>3</sub> PO <sub>4</sub> |
| 333.1727 <sup>+2</sup> | y <sub>5</sub> <sup>+2</sup>                                 | 567.3613               | y <sub>5</sub> -H <sub>3</sub> PO <sub>4</sub>                | 762.391                | y <sub>6</sub>                                                | 1102.6004              | b <sub>10</sub>                                 | 1651.9642 | y <sub>15</sub> -H <sub>3</sub> PO <sub>4</sub> |
| 365.1456               | b <sub>3</sub>                                               | 579.8771 <sup>+2</sup> | y <sub>10</sub> -H <sub>3</sub> PO <sub>4</sub> <sup>+2</sup> | 764.3686               | b <sub>7</sub>                                                | 1158.747               | y <sub>10</sub> -H <sub>3</sub> PO <sub>4</sub> | 1689.8724 | b <sub>15</sub>                                 |
| 381.6991 <sup>+2</sup> | y <sub>6</sub> <sup>+2</sup>                                 | 600.3302 <sup>+2</sup> | b <sub>11</sub> <sup>+2</sup>                                 | 788.8978 <sup>+2</sup> | b <sub>14</sub> <sup>+2</sup>                                 | 1199.6531              | b <sub>11</sub>                                 | 1749.9411 | y <sub>15</sub>                                 |
| 382.6879 <sup>+2</sup> | b <sub>7</sub> <sup>+2</sup>                                 | 608.2675               | b <sub>6</sub>                                                | 792.509                | y <sub>7</sub> -H <sub>3</sub> PO <sub>4</sub>                | 1245.779               | y <sub>11</sub> -H <sub>3</sub> PO <sub>4</sub> | 1766.0072 | MH-H <sub>3</sub> PO <sub>4</sub>               |
| 385.2558               | y <sub>3</sub>                                               | 623.3931 <sup>+2</sup> | y <sub>11</sub> -H <sub>3</sub> PO <sub>4</sub> <sup>+2</sup> | 793.9425 <sup>+2</sup> | y <sub>14</sub> <sup>+2</sup>                                 | 1256.7239              | y <sub>10</sub>                                 | 1863.9841 | MH                                              |
| 396.7582 <sup>+2</sup> | y <sub>7</sub> -H <sub>3</sub> PO <sub>4</sub> <sup>+2</sup> | 628.8656 <sup>+2</sup> | y <sub>10</sub> <sup>+2</sup>                                 | 796.4514 <sup>+2</sup> | b <sub>15</sub> -H <sub>3</sub> PO <sub>4</sub> <sup>+2</sup> | 1302.8005              | y <sub>12</sub> -H <sub>3</sub> PO <sub>4</sub> |           |                                                 |
| 431.2143 <sup>+2</sup> | b <sub>8</sub> <sup>+2</sup>                                 | 651.9039 <sup>+2</sup> | y <sub>12</sub> -H <sub>3</sub> PO <sub>4</sub> <sup>+2</sup> | 826.4858 <sup>+2</sup> | y <sub>15</sub> -H <sub>3</sub> PO <sub>4</sub> <sup>+2</sup> | 1312.7372              | b <sub>12</sub>                                 |           |                                                 |
| 445.7466 <sup>+2</sup> | y <sub>7</sub> <sup>+2</sup>                                 | 656.8722 <sup>+2</sup> | b <sub>12</sub> <sup>+2</sup>                                 | 845.4398 <sup>+2</sup> | b <sub>15</sub> <sup>+2</sup>                                 | 1343.7559              | y <sub>11</sub>                                 |           |                                                 |



MS/MS Fragmentation of ASsLNFLNK  
 Found in IPI00021634, Kinesin light chain 2

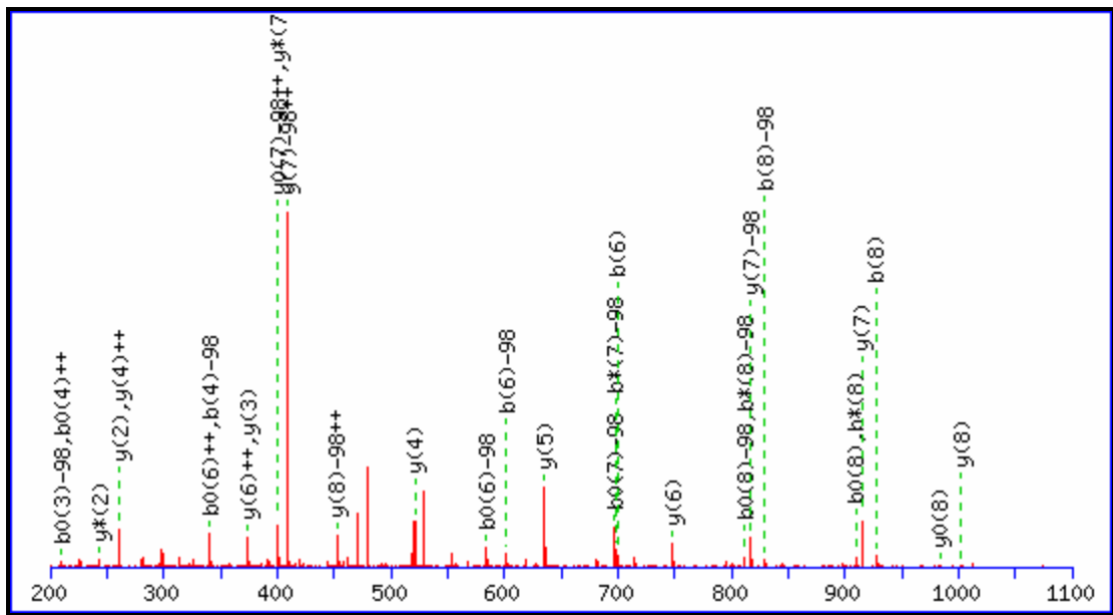

|                        |                                                |                        |                                                              |                        |                                                 |          |                                                |           |                                   |
|------------------------|------------------------------------------------|------------------------|--------------------------------------------------------------|------------------------|-------------------------------------------------|----------|------------------------------------------------|-----------|-----------------------------------|
| 74.0600 <sup>+2</sup>  | y <sub>1</sub> <sup>+2</sup>                   | 318.1792 <sup>+2</sup> | y <sub>5</sub> <sup>+2</sup>                                 | 455.2249               | b <sub>5</sub> -H <sub>3</sub> PO <sub>4</sub>  | 635.3511 | y <sub>5</sub>                                 | 915.4336  | y <sub>7</sub>                    |
| 131.0815 <sup>+2</sup> | y <sub>2</sub> <sup>+2</sup>                   | 326.0748               | b <sub>3</sub>                                               | 458.2204 <sup>+2</sup> | y <sub>7</sub> <sup>+2</sup>                    | 700.2702 | b <sub>6</sub>                                 | 927.3972  | b <sub>8</sub>                    |
| 147.1128               | y <sub>1</sub>                                 | 341.1819               | b <sub>4</sub> -H <sub>3</sub> PO <sub>4</sub>               | 488.2665 <sup>+2</sup> | MH-H <sub>3</sub> PO <sub>4</sub> <sup>+2</sup> | 715.3774 | b <sub>7</sub> -H <sub>3</sub> PO <sub>4</sub> | 975.5258  | MH-H <sub>3</sub> PO <sub>4</sub> |
| 159.0764               | b <sub>2</sub>                                 | 374.2398               | y <sub>3</sub>                                               | 501.7364 <sup>+2</sup> | y <sub>8</sub> <sup>+2</sup>                    | 748.4352 | y <sub>6</sub>                                 | 1002.4656 | y <sub>8</sub>                    |
| 187.6235 <sup>+2</sup> | y <sub>3</sub> <sup>+2</sup>                   | 374.7212 <sup>+2</sup> | y <sub>6</sub> <sup>+2</sup>                                 | 521.3082               | y <sub>4</sub>                                  | 813.3542 | b <sub>7</sub>                                 | 1073.5027 | MH                                |
| 228.0979               | b <sub>3</sub> -H <sub>3</sub> PO <sub>4</sub> | 409.2320 <sup>+2</sup> | y <sub>7</sub> -H <sub>3</sub> PO <sub>4</sub> <sup>+2</sup> | 537.2550 <sup>+2</sup> | MH <sup>+2</sup>                                | 817.4567 | y <sub>7</sub> -H <sub>3</sub> PO <sub>4</sub> |           |                                   |
| 261.1557               | y <sub>2</sub>                                 | 439.1588               | b <sub>4</sub>                                               | 553.2018               | b <sub>5</sub>                                  | 829.4203 | b <sub>8</sub> -H <sub>3</sub> PO <sub>4</sub> |           |                                   |
| 261.1577 <sup>+2</sup> | y <sub>4</sub> <sup>+2</sup>                   | 452.7480 <sup>+2</sup> | y <sub>8</sub> -H <sub>3</sub> PO <sub>4</sub> <sup>+2</sup> | 602.2933               | b <sub>6</sub> -H <sub>3</sub> PO <sub>4</sub>  | 904.4887 | y <sub>8</sub> -H <sub>3</sub> PO <sub>4</sub> |           |                                   |

MS/MS Fragmentation of RASsLNFLNK  
 Found in IPI00021634, Kinesin light chain 2

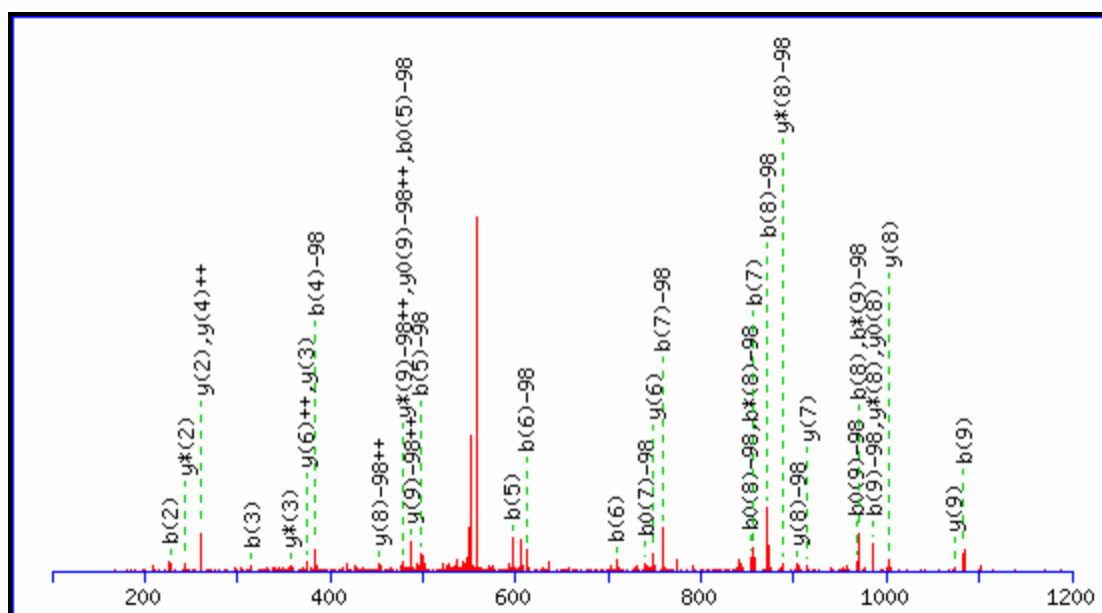

|                        |                                                              |                        |                                                              |                        |                                                              |                        |                                                |           |                                                |
|------------------------|--------------------------------------------------------------|------------------------|--------------------------------------------------------------|------------------------|--------------------------------------------------------------|------------------------|------------------------------------------------|-----------|------------------------------------------------|
| 74.0600 <sup>+2</sup>  | y <sub>1</sub> <sup>+2</sup>                                 | 298.1336 <sup>+2</sup> | b <sub>2</sub> <sup>+2</sup>                                 | 452.7480 <sup>+2</sup> | y <sub>8</sub> -H <sub>3</sub> PO <sub>4</sub> <sup>+2</sup> | 595.26                 | b <sub>5</sub>                                 | 969.4554  | b <sub>8</sub>                                 |
| 114.5764 <sup>+2</sup> | b <sub>2</sub> <sup>+2</sup>                                 | 306.1666 <sup>+2</sup> | b <sub>6</sub> -H <sub>3</sub> PO <sub>4</sub> <sup>+2</sup> | 458.2204 <sup>+2</sup> | y <sub>7</sub> <sup>+2</sup>                                 | 611.326                | b <sub>6</sub> -H <sub>3</sub> PO <sub>4</sub> | 975.5258  | y <sub>9</sub> -H <sub>3</sub> PO <sub>4</sub> |
| 131.0815 <sup>+2</sup> | y <sub>2</sub> <sup>+2</sup>                                 | 315.1775               | b <sub>3</sub>                                               | 482.1759               | b <sub>4</sub>                                               | 615.3055 <sup>+2</sup> | MH <sup>+2</sup>                               | 985.5214  | b <sub>9</sub> -H <sub>3</sub> PO <sub>4</sub> |
| 147.1128               | y <sub>1</sub>                                               | 318.1792 <sup>+2</sup> | y <sub>5</sub> <sup>+2</sup>                                 | 485.2313 <sup>+2</sup> | b <sub>8</sub> <sup>+2</sup>                                 | 635.3511               | y <sub>5</sub>                                 | 1002.4656 | y <sub>8</sub>                                 |
| 158.0924 <sup>+2</sup> | b <sub>3</sub> <sup>+2</sup>                                 | 355.1551 <sup>+2</sup> | b <sub>6</sub> <sup>+2</sup>                                 | 488.2665 <sup>+2</sup> | y <sub>9</sub> -H <sub>3</sub> PO <sub>4</sub> <sup>+2</sup> | 709.3029               | b <sub>6</sub>                                 | 1073.5027 | y <sub>9</sub>                                 |
| 187.6235 <sup>+2</sup> | y <sub>3</sub> <sup>+2</sup>                                 | 374.2398               | y <sub>3</sub>                                               | 493.2643 <sup>+2</sup> | b <sub>9</sub> -H <sub>3</sub> PO <sub>4</sub> <sup>+2</sup> | 748.4352               | y <sub>6</sub>                                 | 1083.4983 | b <sub>9</sub>                                 |
| 192.6031 <sup>+2</sup> | b <sub>4</sub> -H <sub>3</sub> PO <sub>4</sub> <sup>+2</sup> | 374.7212 <sup>+2</sup> | y <sub>6</sub> <sup>+2</sup>                                 | 497.2831               | b <sub>5</sub> -H <sub>3</sub> PO <sub>4</sub>               | 758.3944               | b <sub>7</sub> -H <sub>3</sub> PO <sub>4</sub> | 1131.6269 | MH-H <sub>3</sub> PO <sub>4</sub>              |
| 228.1455               | b <sub>2</sub>                                               | 379.7008 <sup>+2</sup> | b <sub>7</sub> -H <sub>3</sub> PO <sub>4</sub> <sup>+2</sup> | 501.7364 <sup>+2</sup> | y <sub>8</sub> <sup>+2</sup>                                 | 817.4567               | y <sub>7</sub> -H <sub>3</sub> PO <sub>4</sub> | 1229.6038 | MH                                             |
| 241.5916 <sup>+2</sup> | b <sub>4</sub> <sup>+2</sup>                                 | 384.199                | b <sub>4</sub> -H <sub>3</sub> PO <sub>4</sub>               | 521.3082               | y <sub>4</sub>                                               | 856.3713               | b <sub>7</sub>                                 |           |                                                |
| 249.1452 <sup>+2</sup> | b <sub>5</sub> -H <sub>3</sub> PO <sub>4</sub> <sup>+2</sup> | 409.2320 <sup>+2</sup> | y <sub>7</sub> -H <sub>3</sub> PO <sub>4</sub> <sup>+2</sup> | 537.2550 <sup>+2</sup> | y <sub>9</sub> <sup>+2</sup>                                 | 871.4785               | b <sub>8</sub> -H <sub>3</sub> PO <sub>4</sub> |           |                                                |
| 261.1557               | y <sub>2</sub>                                               | 428.6893 <sup>+2</sup> | b <sub>7</sub> <sup>+2</sup>                                 | 542.2528 <sup>+2</sup> | b <sub>9</sub> <sup>+2</sup>                                 | 904.4887               | y <sub>8</sub> -H <sub>3</sub> PO <sub>4</sub> |           |                                                |
| 261.1577 <sup>+2</sup> | y <sub>4</sub> <sup>+2</sup>                                 | 436.2429 <sup>+2</sup> | b <sub>8</sub> -H <sub>3</sub> PO <sub>4</sub> <sup>+2</sup> | 566.3171 <sup>+2</sup> | MH-H <sub>3</sub> PO <sub>4</sub> <sup>+2</sup>              | 915.4336               | y <sub>7</sub>                                 |           |                                                |

MS/MS Fragmentation of TLS(SS)SMDLSR  
 Found in IPI00021634, Kinesin light chain 2

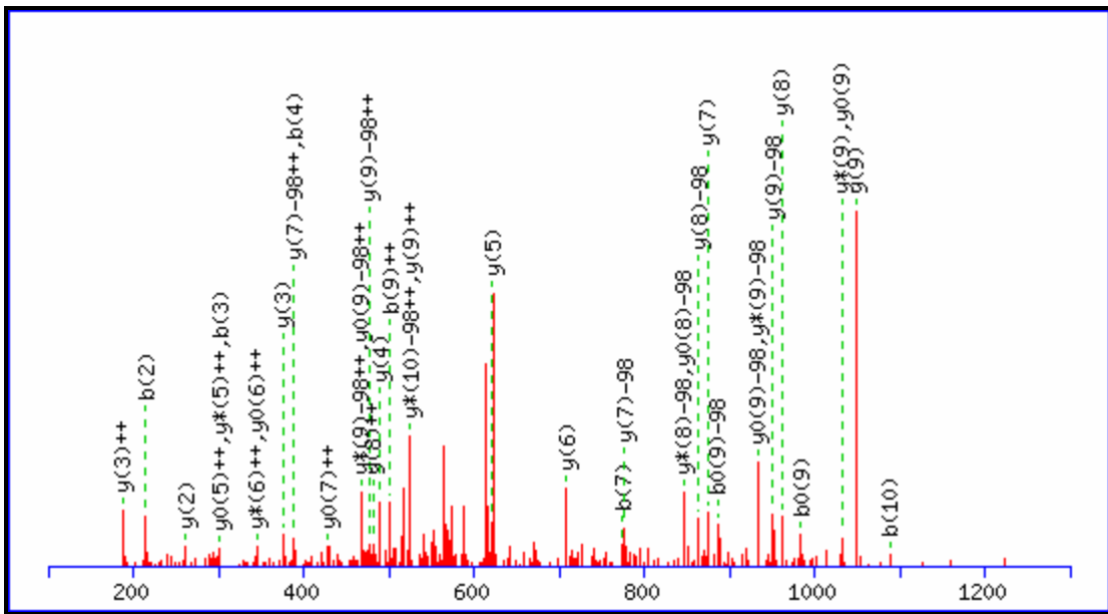

|                        |                              |                        |                                                              |                        |                                                               |          |                                                 |           |                                                 |
|------------------------|------------------------------|------------------------|--------------------------------------------------------------|------------------------|---------------------------------------------------------------|----------|-------------------------------------------------|-----------|-------------------------------------------------|
| 88.0631 <sup>+2</sup>  | y <sub>1</sub> <sup>+2</sup> | 375.235                | y <sub>3</sub>                                               | 532.7557 <sup>+2</sup> | y <sub>10</sub> -H <sub>3</sub> PO <sub>4</sub> <sup>+2</sup> | 774.2739 | b <sub>7</sub>                                  | 1002.385  | b <sub>9</sub>                                  |
| 131.5791 <sup>+2</sup> | y <sub>2</sub> <sup>+2</sup> | 389.1816 <sup>+2</sup> | y <sub>7</sub> -H <sub>3</sub> PO <sub>4</sub> <sup>+2</sup> | 545.2566               | b <sub>6</sub> -H <sub>3</sub> PO <sub>4</sub>                | 777.356  | y <sub>7</sub> -H <sub>3</sub> PO <sub>4</sub>  | 1049.3969 | y <sub>9</sub>                                  |
| 175.119                | y <sub>1</sub>               | 389.2031               | b <sub>4</sub>                                               | 556.2014               | b <sub>5</sub>                                                | 791.324  | b <sub>8</sub> -H <sub>3</sub> PO <sub>4</sub>  | 1064.5041 | y <sub>10</sub> -H <sub>3</sub> PO <sub>4</sub> |
| 188.1212 <sup>+2</sup> | y <sub>3</sub> <sup>+2</sup> | 432.6976 <sup>+2</sup> | y <sub>8</sub> -H <sub>3</sub> PO <sub>4</sub> <sup>+2</sup> | 581.7441 <sup>+2</sup> | y <sub>10</sub> <sup>+2</sup>                                 | 864.388  | y <sub>8</sub> -H <sub>3</sub> PO <sub>4</sub>  | 1089.417  | b <sub>10</sub>                                 |
| 215.139                | b <sub>2</sub>               | 438.1701 <sup>+2</sup> | y <sub>7</sub> <sup>+2</sup>                                 | 583.2795 <sup>+2</sup> | MH-H <sub>3</sub> PO <sub>4</sub> <sup>+2</sup>               | 875.3329 | y <sub>7</sub>                                  | 1162.481  | y <sub>10</sub>                                 |
| 245.6346 <sup>+2</sup> | y <sub>4</sub> <sup>+2</sup> | 458.2245               | b <sub>5</sub> -H <sub>3</sub> PO <sub>4</sub>               | 621.3025               | y <sub>5</sub>                                                | 889.3009 | b <sub>8</sub>                                  | 1165.5518 | MH-H <sub>3</sub> PO <sub>4</sub>               |
| 262.151                | y <sub>2</sub>               | 476.2136 <sup>+2</sup> | y <sub>9</sub> -H <sub>3</sub> PO <sub>4</sub> <sup>+2</sup> | 632.2680 <sup>+2</sup> | MH <sup>+2</sup>                                              | 904.4081 | b <sub>9</sub> -H <sub>3</sub> PO <sub>4</sub>  | 1263.5287 | MH                                              |
| 302.171                | b <sub>3</sub>               | 481.6861 <sup>+2</sup> | y <sub>8</sub> <sup>+2</sup>                                 | 643.2335               | b <sub>6</sub>                                                | 951.42   | y <sub>9</sub> -H <sub>3</sub> PO <sub>4</sub>  |           |                                                 |
| 311.1549 <sup>+2</sup> | y <sub>5</sub> <sup>+2</sup> | 490.262                | y <sub>4</sub>                                               | 676.2971               | b <sub>7</sub> -H <sub>3</sub> PO <sub>4</sub>                | 962.3649 | y <sub>8</sub>                                  |           |                                                 |
| 354.6709 <sup>+2</sup> | y <sub>6</sub> <sup>+2</sup> | 525.2021 <sup>+2</sup> | y <sub>9</sub> <sup>+2</sup>                                 | 708.3345               | y <sub>6</sub>                                                | 991.4401 | b <sub>10</sub> -H <sub>3</sub> PO <sub>4</sub> |           |                                                 |

MS/MS Fragmentation of SRGPSsAVLPSALGsR  
 Found in IPI00006682, Protein phosphatase 1 regulatory subunit 3D

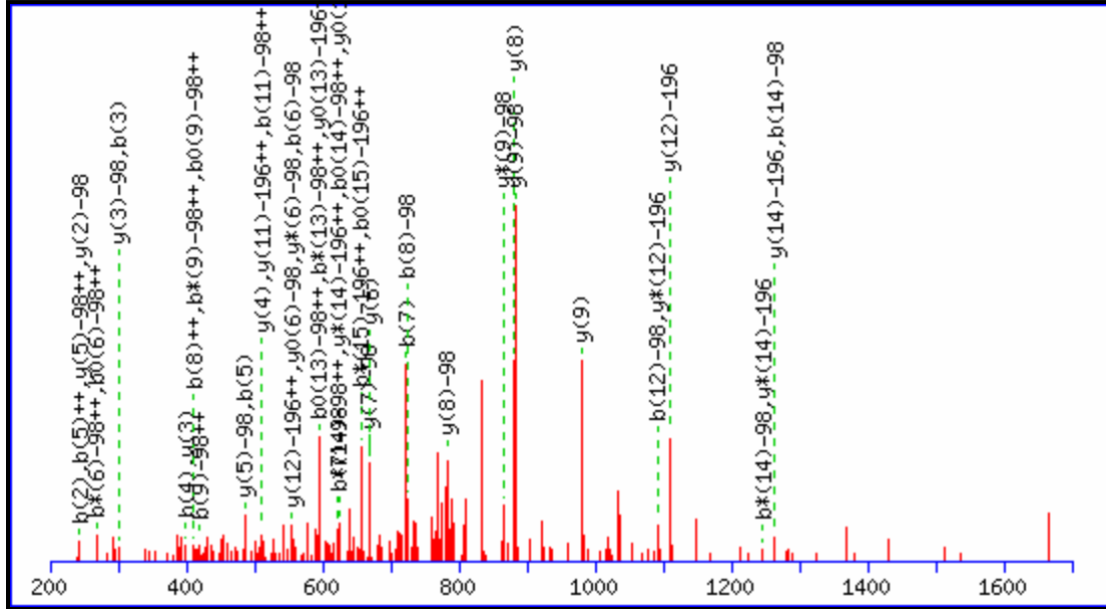

|                        |                                                              |                        |                                                                |                        |                                                                |                        |                                                               |           |                                                  |
|------------------------|--------------------------------------------------------------|------------------------|----------------------------------------------------------------|------------------------|----------------------------------------------------------------|------------------------|---------------------------------------------------------------|-----------|--------------------------------------------------|
| 88.0631 <sup>+2</sup>  | y <sub>1</sub> <sup>+2</sup>                                 | 362.1447 <sup>+2</sup> | b <sub>7</sub> <sup>+2</sup>                                   | 560.2633 <sup>+2</sup> | b <sub>11</sub> <sup>+2</sup>                                  | 724.3737               | b <sub>8</sub> -H <sub>3</sub> PO <sub>4</sub>                | 1190.5565 | b <sub>12</sub>                                  |
| 122.5738 <sup>+2</sup> | b <sub>2</sub> <sup>+2</sup>                                 | 362.6905 <sup>+2</sup> | b <sub>8</sub> -H <sub>3</sub> PO <sub>4</sub> <sup>+2</sup>   | 560.2815 <sup>+2</sup> | y <sub>11</sub> -H <sub>3</sub> PO <sub>4</sub> <sup>+2</sup>  | 729.8231 <sup>+2</sup> | y <sub>14</sub> <sup>+2</sup>                                 | 1205.6637 | b <sub>13</sub> -H <sub>3</sub> PO <sub>4</sub>  |
| 122.5738 <sup>+2</sup> | y <sub>2</sub> -H <sub>3</sub> PO <sub>4</sub> <sup>+2</sup> | 384.1760 <sup>+2</sup> | y <sub>7</sub> <sup>+2</sup>                                   | 572.3151               | y <sub>6</sub> -H <sub>3</sub> PO <sub>4</sub>                 | 758.8852 <sup>+2</sup> | y <sub>15</sub> -H <sub>3</sub> PO <sub>4</sub> <sup>+2</sup> | 1205.6637 | y <sub>13</sub> -2H <sub>3</sub> PO <sub>4</sub> |
| 151.0846 <sup>+2</sup> | b <sub>3</sub> <sup>+2</sup>                                 | 391.7296 <sup>+2</sup> | y <sub>8</sub> -H <sub>3</sub> PO <sub>4</sub> <sup>+2</sup>   | 583.26                 | y <sub>5</sub>                                                 | 764.3338 <sup>+2</sup> | b <sub>15</sub> <sup>+2</sup>                                 | 1206.5878 | y <sub>12</sub> -H <sub>3</sub> PO <sub>4</sub>  |
| 151.0846 <sup>+2</sup> | y <sub>3</sub> -H <sub>3</sub> PO <sub>4</sub> <sup>+2</sup> | 398.2146               | b <sub>4</sub>                                                 | 595.7819 <sup>+2</sup> | b <sub>12</sub> <sup>+2</sup>                                  | 767.3447               | y <sub>7</sub>                                                | 1217.5327 | y <sub>11</sub>                                  |
| 171.5623 <sup>+2</sup> | y <sub>2</sub> <sup>+2</sup>                                 | 399.1388               | y <sub>3</sub>                                                 | 603.3355 <sup>+2</sup> | b <sub>13</sub> -H <sub>3</sub> PO <sub>4</sub> <sup>+2</sup>  | 782.4519               | y <sub>8</sub> -H <sub>3</sub> PO <sub>4</sub>                | 1262.6852 | b <sub>14</sub> -H <sub>3</sub> PO <sub>4</sub>  |
| 175.119                | y <sub>1</sub>                                               | 411.6789 <sup>+2</sup> | b <sub>8</sub> <sup>+2</sup>                                   | 603.3355 <sup>+2</sup> | y <sub>13</sub> -2H <sub>3</sub> PO <sub>4</sub> <sup>+2</sup> | 802.4012 <sup>+2</sup> | MH-H <sub>3</sub> PO <sub>4</sub> <sup>+2</sup>               | 1262.6852 | y <sub>14</sub> -2H <sub>3</sub> PO <sub>4</sub> |
| 199.6110 <sup>+2</sup> | b <sub>4</sub> <sup>+2</sup>                                 | 414.2459               | y <sub>4</sub> -H <sub>3</sub> PO <sub>4</sub>                 | 603.7976 <sup>+2</sup> | y <sub>12</sub> -H <sub>3</sub> PO <sub>4</sub> <sup>+2</sup>  | 807.8737 <sup>+2</sup> | y <sub>15</sub> <sup>+2</sup>                                 | 1303.6406 | b <sub>13</sub>                                  |
| 200.0730 <sup>+2</sup> | y <sub>3</sub> <sup>+2</sup>                                 | 419.2325 <sup>+2</sup> | b <sub>9</sub> -H <sub>3</sub> PO <sub>4</sub> <sup>+2</sup>   | 609.2700 <sup>+2</sup> | y <sub>11</sub> <sup>+2</sup>                                  | 822.3506               | b <sub>8</sub>                                                | 1303.6406 | y <sub>13</sub> -H <sub>3</sub> PO <sub>4</sub>  |
| 207.6266 <sup>+2</sup> | y <sub>4</sub> -H <sub>3</sub> PO <sub>4</sub> <sup>+2</sup> | 440.7180 <sup>+2</sup> | y <sub>8</sub> <sup>+2</sup>                                   | 625.3052               | b <sub>7</sub> -H <sub>3</sub> PO <sub>4</sub>                 | 837.4577               | b <sub>9</sub> -H <sub>3</sub> PO <sub>4</sub>                | 1304.5647 | y <sub>12</sub>                                  |
| 243.1270 <sup>+2</sup> | b <sub>5</sub> <sup>+2</sup>                                 | 441.2638 <sup>+2</sup> | y <sub>9</sub> -H <sub>3</sub> PO <sub>4</sub> <sup>+2</sup>   | 631.8462 <sup>+2</sup> | b <sub>14</sub> -H <sub>3</sub> PO <sub>4</sub> <sup>+2</sup>  | 851.3897 <sup>+2</sup> | MH <sup>+2</sup>                                              | 1331.7066 | b <sub>15</sub> -2H <sub>3</sub> PO <sub>4</sub> |
| 243.1452 <sup>+2</sup> | y <sub>5</sub> -H <sub>3</sub> PO <sub>4</sub> <sup>+2</sup> | 467.7589 <sup>+2</sup> | b <sub>10</sub> -H <sub>3</sub> PO <sub>4</sub> <sup>+2</sup>  | 631.8462 <sup>+2</sup> | y <sub>14</sub> -2H <sub>3</sub> PO <sub>4</sub> <sup>+2</sup> | 880.4288               | y <sub>8</sub>                                                | 1360.6621 | b <sub>14</sub>                                  |
| 244.1404               | b <sub>2</sub>                                               | 468.2209 <sup>+2</sup> | b <sub>9</sub> <sup>+2</sup>                                   | 652.245                | b <sub>6</sub>                                                 | 881.5203               | y <sub>9</sub> -H <sub>3</sub> PO <sub>4</sub>                | 1360.6621 | y <sub>14</sub> -H <sub>3</sub> PO <sub>4</sub>  |
| 244.1404               | y <sub>2</sub> -H <sub>3</sub> PO <sub>4</sub>               | 476.7824 <sup>+2</sup> | y <sub>10</sub> -H <sub>3</sub> PO <sub>4</sub> <sup>+2</sup>  | 652.3239 <sup>+2</sup> | b <sub>13</sub> <sup>+2</sup>                                  | 934.5105               | b <sub>10</sub> -H <sub>3</sub> PO <sub>4</sub>               | 1401.6175 | y <sub>13</sub>                                  |
| 256.6151 <sup>+2</sup> | y <sub>4</sub> <sup>+2</sup>                                 | 485.2467               | b <sub>5</sub>                                                 | 652.3239 <sup>+2</sup> | y <sub>13</sub> -H <sub>3</sub> PO <sub>4</sub> <sup>+2</sup>  | 935.4346               | b <sub>9</sub>                                                | 1418.7863 | y <sub>15</sub> -2H <sub>3</sub> PO <sub>4</sub> |
| 277.6377 <sup>+2</sup> | b <sub>6</sub> -H <sub>3</sub> PO <sub>4</sub> <sup>+2</sup> | 485.2831               | y <sub>5</sub> -H <sub>3</sub> PO <sub>4</sub>                 | 652.7860 <sup>+2</sup> | y <sub>12</sub> <sup>+2</sup>                                  | 952.5574               | y <sub>10</sub> -H <sub>3</sub> PO <sub>4</sub>               | 1429.6835 | b <sub>15</sub> -H <sub>3</sub> PO <sub>4</sub>  |
| 286.6612 <sup>+2</sup> | y <sub>6</sub> -H <sub>3</sub> PO <sub>4</sub> <sup>+2</sup> | 490.2522 <sup>+2</sup> | y <sub>9</sub> <sup>+2</sup>                                   | 666.3570 <sup>+2</sup> | b <sub>15</sub> -2H <sub>3</sub> PO <sub>4</sub> <sup>+2</sup> | 979.4972               | y <sub>9</sub>                                                | 1458.639  | y <sub>14</sub>                                  |
| 292.1336 <sup>+2</sup> | y <sub>5</sub> <sup>+2</sup>                                 | 511.2749 <sup>+2</sup> | b <sub>11</sub> -H <sub>3</sub> PO <sub>4</sub> <sup>+2</sup>  | 669.3678               | y <sub>7</sub> -H <sub>3</sub> PO <sub>4</sub>                 | 1021.5425              | b <sub>11</sub> -H <sub>3</sub> PO <sub>4</sub>               | 1516.7632 | y <sub>15</sub> -H <sub>3</sub> PO <sub>4</sub>  |
| 301.1619               | y <sub>3</sub> -H <sub>3</sub> PO <sub>4</sub>               | 511.2931 <sup>+2</sup> | y <sub>11</sub> -2H <sub>3</sub> PO <sub>4</sub> <sup>+2</sup> | 670.292                | y <sub>6</sub>                                                 | 1021.5789              | y <sub>11</sub> -2H <sub>3</sub> PO <sub>4</sub>              | 1527.6604 | b <sub>15</sub>                                  |
| 301.1619               | b <sub>3</sub>                                               | 512.2228               | y <sub>4</sub>                                                 | 680.8347 <sup>+2</sup> | b <sub>14</sub> <sup>+2</sup>                                  | 1032.4874              | b <sub>10</sub>                                               | 1603.7952 | MH-H <sub>3</sub> PO <sub>4</sub>                |
| 313.1563 <sup>+2</sup> | b <sub>7</sub> -H <sub>3</sub> PO <sub>4</sub> <sup>+2</sup> | 516.7473 <sup>+2</sup> | b <sub>10</sub> <sup>+2</sup>                                  | 680.8347 <sup>+2</sup> | y <sub>14</sub> -H <sub>3</sub> PO <sub>4</sub> <sup>+2</sup>  | 1050.5343              | y <sub>10</sub>                                               | 1614.7401 | y <sub>15</sub>                                  |
| 326.6262 <sup>+2</sup> | b <sub>6</sub> <sup>+2</sup>                                 | 525.7708 <sup>+2</sup> | y <sub>10</sub> <sup>+2</sup>                                  | 701.3124 <sup>+2</sup> | y <sub>13</sub> <sup>+2</sup>                                  | 1092.5796              | b <sub>12</sub> -H <sub>3</sub> PO <sub>4</sub>               | 1701.7721 | MH                                               |
| 335.1876 <sup>+2</sup> | y <sub>7</sub> -H <sub>3</sub> PO <sub>4</sub> <sup>+2</sup> | 546.7935 <sup>+2</sup> | b <sub>12</sub> -H <sub>3</sub> PO <sub>4</sub> <sup>+2</sup>  | 709.8968 <sup>+2</sup> | y <sub>15</sub> -2H <sub>3</sub> PO <sub>4</sub> <sup>+2</sup> | 1108.6109              | y <sub>12</sub> -2H <sub>3</sub> PO <sub>4</sub>              |           |                                                  |
| 335.6496 <sup>+2</sup> | y <sub>6</sub> <sup>+2</sup>                                 | 554.2681               | b <sub>6</sub> -H <sub>3</sub> PO <sub>4</sub>                 | 715.3454 <sup>+2</sup> | b <sub>15</sub> -H <sub>3</sub> PO <sub>4</sub> <sup>+2</sup>  | 1119.5194              | b <sub>11</sub>                                               |           |                                                  |
| 342.1173               | y <sub>2</sub>                                               | 554.8091 <sup>+2</sup> | y <sub>12</sub> -2H <sub>3</sub> PO <sub>4</sub> <sup>+2</sup> | 723.2821               | b <sub>7</sub>                                                 | 1119.5558              | y <sub>11</sub> -H <sub>3</sub> PO <sub>4</sub>               |           |                                                  |

MS/MS Fragmentation of SLsCLSDLDGGVALEPR  
 Found in IPI00006682, Protein phosphatase 1 regulatory subunit 3D

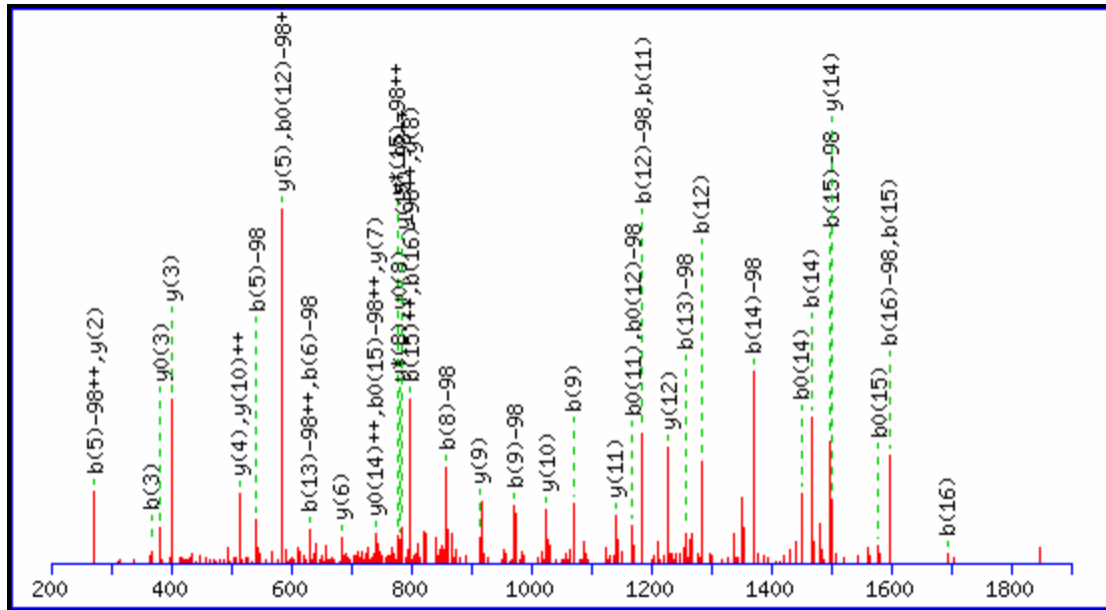

|                        |                                                |                        |                                                |                        |                                                               |           |                                                 |           |                                                 |
|------------------------|------------------------------------------------|------------------------|------------------------------------------------|------------------------|---------------------------------------------------------------|-----------|-------------------------------------------------|-----------|-------------------------------------------------|
| 88.0631 <sup>+2</sup>  | y <sub>1</sub> <sup>+2</sup>                   | 401.2143               | y <sub>3</sub>                                 | 688.2971               | b <sub>7</sub> -H <sub>3</sub> PO <sub>4</sub>                | 916.4081  | b <sub>9</sub> -H <sub>3</sub> PO <sub>4</sub>  | 1341.7009 | y <sub>13</sub>                                 |
| 136.5895 <sup>+2</sup> | y <sub>2</sub> <sup>+2</sup>                   | 457.2405 <sup>+2</sup> | y <sub>9</sub> <sup>+2</sup>                   | 722.8587 <sup>+2</sup> | y <sub>14</sub> <sup>+2</sup>                                 | 973.4295  | b <sub>10</sub> -H <sub>3</sub> PO <sub>4</sub> | 1411.6175 | b <sub>14</sub>                                 |
| 175.119                | y <sub>1</sub>                                 | 471.1309               | b <sub>4</sub>                                 | 741.4254               | y <sub>7</sub>                                                | 1014.385  | b <sub>9</sub>                                  | 1442.6832 | b <sub>15</sub> -H <sub>3</sub> PO <sub>4</sub> |
| 201.1108 <sup>+2</sup> | y <sub>3</sub> <sup>+2</sup>                   | 486.2381               | b <sub>5</sub> -H <sub>3</sub> PO <sub>4</sub> | 757.3694 <sup>+2</sup> | y <sub>15</sub> -H <sub>3</sub> PO <sub>4</sub> <sup>+2</sup> | 1026.5578 | y <sub>10</sub>                                 | 1444.7101 | y <sub>14</sub>                                 |
| 201.1234               | b <sub>2</sub>                                 | 513.7826 <sup>+2</sup> | y <sub>10</sub> <sup>+2</sup>                  | 786.2739               | b <sub>7</sub>                                                | 1030.451  | b <sub>11</sub> -H <sub>3</sub> PO <sub>4</sub> | 1513.7315 | y <sub>15</sub> -H <sub>3</sub> PO <sub>4</sub> |
| 257.6528 <sup>+2</sup> | y <sub>4</sub> <sup>+2</sup>                   | 514.2984               | y <sub>4</sub>                                 | 798.4468               | y <sub>8</sub>                                                | 1071.4064 | b <sub>10</sub>                                 | 1539.7359 | b <sub>16</sub> -H <sub>3</sub> PO <sub>4</sub> |
| 270.1448               | b <sub>3</sub> -H <sub>3</sub> PO <sub>4</sub> | 571.2960 <sup>+2</sup> | y <sub>11</sub> <sup>+2</sup>                  | 801.3811               | b <sub>8</sub> -H <sub>3</sub> PO <sub>4</sub>                | 1128.4279 | b <sub>11</sub>                                 | 1540.6601 | b <sub>15</sub>                                 |
| 272.1717               | y <sub>2</sub>                                 | 573.2701               | b <sub>6</sub> -H <sub>3</sub> PO <sub>4</sub> | 806.3578 <sup>+2</sup> | y <sub>15</sub> <sup>+2</sup>                                 | 1129.5194 | b <sub>12</sub> -H <sub>3</sub> PO <sub>4</sub> | 1611.7084 | y <sub>15</sub>                                 |
| 293.1714 <sup>+2</sup> | y <sub>5</sub> <sup>+2</sup>                   | 584.215                | b <sub>5</sub>                                 | 813.9114 <sup>+2</sup> | y <sub>16</sub> -H <sub>3</sub> PO <sub>4</sub> <sup>+2</sup> | 1141.5848 | y <sub>11</sub>                                 | 1626.8156 | y <sub>16</sub> -H <sub>3</sub> PO <sub>4</sub> |
| 342.7056 <sup>+2</sup> | y <sub>6</sub> <sup>+2</sup>                   | 585.3355               | y <sub>5</sub>                                 | 857.4274 <sup>+2</sup> | MH-H <sub>3</sub> PO <sub>4</sub> <sup>+2</sup>               | 1200.5565 | b <sub>13</sub> -H <sub>3</sub> PO <sub>4</sub> | 1637.7128 | b <sub>16</sub>                                 |
| 368.1217               | b <sub>3</sub>                                 | 614.8120 <sup>+2</sup> | y <sub>12</sub> <sup>+2</sup>                  | 862.8999 <sup>+2</sup> | y <sub>16</sub> <sup>+2</sup>                                 | 1227.4963 | b <sub>12</sub>                                 | 1713.8476 | MH-H <sub>3</sub> PO <sub>4</sub>               |
| 371.2163 <sup>+2</sup> | y <sub>7</sub> <sup>+2</sup>                   | 671.247                | b <sub>6</sub>                                 | 899.358                | b <sub>8</sub>                                                | 1228.6168 | y <sub>12</sub>                                 | 1724.7925 | y <sub>16</sub>                                 |
| 373.154                | b <sub>4</sub> -H <sub>3</sub> PO <sub>4</sub> | 671.3541 <sup>+2</sup> | y <sub>13</sub> <sup>+2</sup>                  | 906.4159 <sup>+2</sup> | MH <sup>+2</sup>                                              | 1298.5334 | b <sub>13</sub>                                 | 1811.8245 | MH                                              |
| 399.7271 <sup>+2</sup> | y <sub>8</sub> <sup>+2</sup>                   | 684.4039               | y <sub>6</sub>                                 | 913.4738               | y <sub>9</sub>                                                | 1313.6406 | b <sub>14</sub> -H <sub>3</sub> PO <sub>4</sub> |           |                                                 |

MS/MS Fragmentation of GPVPQHVVEAPDGAAAASGsSLDSFSR  
 Found in IPI00552905, Isoform 1 of Proline-rich transmembrane protein 3

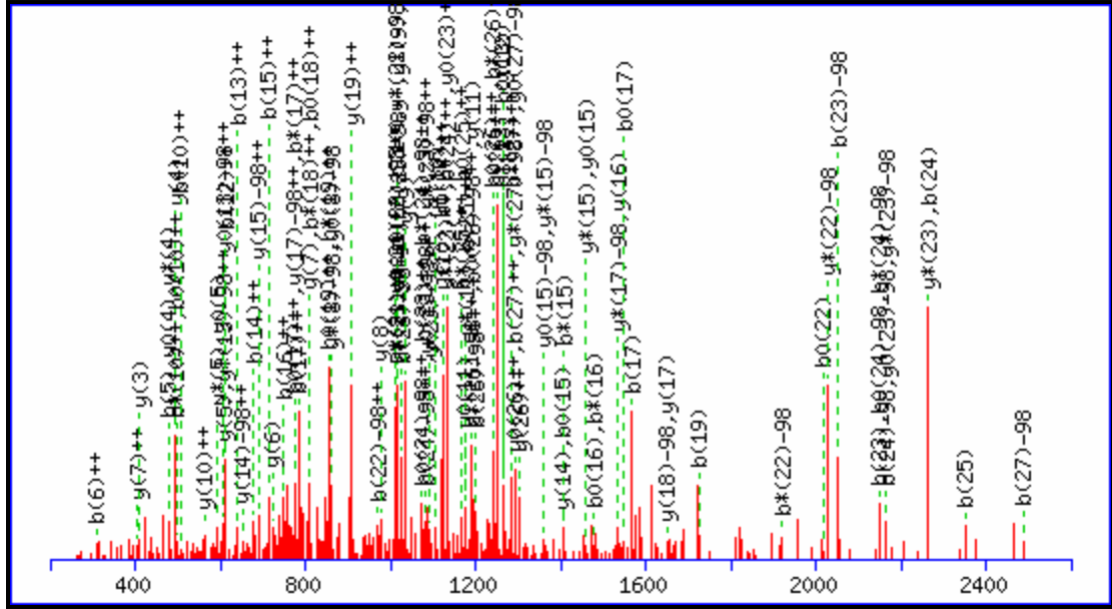

|                        |                                                               |                        |                                                               |                         |                                                               |                         |                                                               |           |                                                 |
|------------------------|---------------------------------------------------------------|------------------------|---------------------------------------------------------------|-------------------------|---------------------------------------------------------------|-------------------------|---------------------------------------------------------------|-----------|-------------------------------------------------|
| 88.0631 <sup>+2</sup>  | y <sub>1</sub> <sup>+2</sup>                                  | 616.3202               | b <sub>6</sub>                                                | 943.4996                | b <sub>9</sub>                                                | 1244.5906 <sup>+2</sup> | b <sub>27</sub> -H <sub>3</sub> PO <sub>4</sub> <sup>+2</sup> | 1848.8359 | y <sub>20</sub> -H <sub>3</sub> PO <sub>4</sub> |
| 131.5791 <sup>+2</sup> | y <sub>2</sub> <sup>+2</sup>                                  | 619.2940 <sup>+2</sup> | y <sub>13</sub> -H <sub>3</sub> PO <sub>4</sub> <sup>+2</sup> | 969.9689 <sup>+2</sup>  | b <sub>22</sub> -H <sub>3</sub> PO <sub>4</sub> <sup>+2</sup> | 1250.0630 <sup>+2</sup> | b <sub>26</sub> <sup>+2</sup>                                 | 1851.8984 | b <sub>21</sub> -H <sub>3</sub> PO <sub>4</sub> |
| 155.0815               | b <sub>2</sub>                                                | 632.7639 <sup>+2</sup> | y <sub>12</sub> <sup>+2</sup>                                 | 973.9100 <sup>+2</sup>  | y <sub>20</sub> <sup>+2</sup>                                 | 1254.0636 <sup>+2</sup> | y <sub>25</sub> <sup>+2</sup>                                 | 1938.9304 | b <sub>22</sub> -H <sub>3</sub> PO <sub>4</sub> |
| 175.119                | y <sub>1</sub>                                                | 642.3226 <sup>+2</sup> | b <sub>13</sub> <sup>+2</sup>                                 | 974.4558 <sup>+2</sup>  | y <sub>21</sub> -H <sub>3</sub> PO <sub>4</sub> <sup>+2</sup> | 1254.6093 <sup>+2</sup> | y <sub>26</sub> -H <sub>3</sub> PO <sub>4</sub> <sup>+2</sup> | 1946.8128 | y <sub>20</sub>                                 |
| 205.1133 <sup>+2</sup> | y <sub>3</sub> <sup>+2</sup>                                  | 654.8126 <sup>+2</sup> | y <sub>14</sub> -H <sub>3</sub> PO <sub>4</sub> <sup>+2</sup> | 975.4413 <sup>+2</sup>  | b <sub>21</sub> <sup>+2</sup>                                 | 1264.5205               | y <sub>12</sub>                                               | 1947.9043 | y <sub>21</sub> -H <sub>3</sub> PO <sub>4</sub> |
| 248.6293 <sup>+2</sup> | y <sub>4</sub> <sup>+2</sup>                                  | 668.2825 <sup>+2</sup> | y <sub>13</sub> <sup>+2</sup>                                 | 978.3928                | y <sub>8</sub>                                                | 1283.6379               | b <sub>13</sub>                                               | 1949.8753 | b <sub>21</sub>                                 |
| 254.1499               | b <sub>3</sub>                                                | 677.8411 <sup>+2</sup> | b <sub>14</sub> <sup>+2</sup>                                 | 1014.5367               | b <sub>10</sub>                                               | 1293.5790 <sup>+2</sup> | b <sub>27</sub> <sup>+2</sup>                                 | 2036.9073 | b <sub>22</sub>                                 |
| 262.151                | y <sub>2</sub>                                                | 690.3311 <sup>+2</sup> | y <sub>15</sub> -H <sub>3</sub> PO <sub>4</sub> <sup>+2</sup> | 1018.9573 <sup>+2</sup> | b <sub>22</sub> <sup>+2</sup>                                 | 1303.1357 <sup>+2</sup> | y <sub>27</sub> -H <sub>3</sub> PO <sub>4</sub> <sup>+2</sup> | 2045.8812 | y <sub>21</sub>                                 |
| 306.1428 <sup>+2</sup> | y <sub>5</sub> <sup>+2</sup>                                  | 703.8010 <sup>+2</sup> | y <sub>14</sub> <sup>+2</sup>                                 | 1023.4442 <sup>+2</sup> | y <sub>21</sub> <sup>+2</sup>                                 | 1303.5978 <sup>+2</sup> | y <sub>26</sub> <sup>+2</sup>                                 | 2046.9727 | y <sub>22</sub> -H <sub>3</sub> PO <sub>4</sub> |
| 308.6637 <sup>+2</sup> | b <sub>6</sub> <sup>+2</sup>                                  | 713.3597 <sup>+2</sup> | b <sub>15</sub> <sup>+2</sup>                                 | 1023.9900 <sup>+2</sup> | y <sub>22</sub> -H <sub>3</sub> PO <sub>4</sub> <sup>+2</sup> | 1308.6179               | y <sub>14</sub> -H <sub>3</sub> PO <sub>4</sub>               | 2052.0145 | b <sub>23</sub> -H <sub>3</sub> PO <sub>4</sub> |
| 351.2027               | b <sub>4</sub>                                                | 715.3886               | b <sub>7</sub>                                                | 1024.4694               | y <sub>10</sub> -H <sub>3</sub> PO <sub>4</sub>               | 1331.6464 <sup>+2</sup> | MH-H <sub>3</sub> PO <sub>4</sub> <sup>+2</sup>               | 2144.9496 | y <sub>22</sub>                                 |
| 358.1979 <sup>+2</sup> | b <sub>7</sub> <sup>+2</sup>                                  | 718.8419 <sup>+2</sup> | y <sub>16</sub> -H <sub>3</sub> PO <sub>4</sub> <sup>+2</sup> | 1026.5109 <sup>+2</sup> | b <sub>23</sub> -H <sub>3</sub> PO <sub>4</sub> <sup>+2</sup> | 1335.5577               | y <sub>13</sub>                                               | 2149.9914 | b <sub>23</sub>                                 |
| 362.6849 <sup>+2</sup> | y <sub>6</sub> <sup>+2</sup>                                  | 724.3624               | y <sub>6</sub>                                                | 1035.4143               | y <sub>9</sub>                                                | 1352.1241 <sup>+2</sup> | y <sub>27</sub> <sup>+2</sup>                                 | 2167.0414 | b <sub>24</sub> -H <sub>3</sub> PO <sub>4</sub> |
| 406.2009 <sup>+2</sup> | y <sub>7</sub> <sup>+2</sup>                                  | 739.3196 <sup>+2</sup> | y <sub>15</sub> <sup>+2</sup>                                 | 1072.9784 <sup>+2</sup> | y <sub>22</sub> <sup>+2</sup>                                 | 1354.675                | b <sub>14</sub>                                               | 2184.0316 | y <sub>23</sub> -H <sub>3</sub> PO <sub>4</sub> |
| 407.7321 <sup>+2</sup> | b <sub>8</sub> <sup>+2</sup>                                  | 748.8782 <sup>+2</sup> | b <sub>16</sub> <sup>+2</sup>                                 | 1075.4993 <sup>+2</sup> | b <sub>23</sub> <sup>+2</sup>                                 | 1379.655                | y <sub>15</sub> -H <sub>3</sub> PO <sub>4</sub>               | 2254.0735 | b <sub>25</sub> -H <sub>3</sub> PO <sub>4</sub> |
| 409.2194               | y <sub>3</sub>                                                | 767.8303 <sup>+2</sup> | y <sub>16</sub> <sup>+2</sup>                                 | 1084.0244 <sup>+2</sup> | b <sub>24</sub> -H <sub>3</sub> PO <sub>4</sub> <sup>+2</sup> | 1380.6349 <sup>+2</sup> | MH <sup>+2</sup>                                              | 2265.0183 | b <sub>24</sub>                                 |
| 440.7116 <sup>+2</sup> | y <sub>8</sub> -H <sub>3</sub> PO <sub>4</sub> <sup>+2</sup>  | 776.3553 <sup>+2</sup> | y <sub>17</sub> -H <sub>3</sub> PO <sub>4</sub> <sup>+2</sup> | 1092.5194 <sup>+2</sup> | y <sub>23</sub> -H <sub>3</sub> PO <sub>4</sub> <sup>+2</sup> | 1406.5948               | y <sub>14</sub>                                               | 2282.0085 | y <sub>23</sub>                                 |
| 469.2223 <sup>+2</sup> | y <sub>9</sub> -H <sub>3</sub> PO <sub>4</sub> <sup>+2</sup>  | 784.3968 <sup>+2</sup> | b <sub>17</sub> <sup>+2</sup>                                 | 1095.5065               | y <sub>11</sub> -H <sub>3</sub> PO <sub>4</sub>               | 1425.7121               | b <sub>15</sub>                                               | 2312.0902 | y <sub>24</sub> -H <sub>3</sub> PO <sub>4</sub> |
| 472.2534 <sup>+2</sup> | b <sub>9</sub> <sup>+2</sup>                                  | 811.3945               | y <sub>7</sub>                                                | 1111.5895               | b <sub>11</sub>                                               | 1436.6764               | y <sub>16</sub> -H <sub>3</sub> PO <sub>4</sub>               | 2352.0504 | b <sub>25</sub>                                 |
| 479.2613               | b <sub>5</sub>                                                | 814.457                | b <sub>8</sub>                                                | 1122.4463               | y <sub>10</sub>                                               | 1477.6319               | y <sub>15</sub>                                               | 2401.1419 | b <sub>26</sub> -H <sub>3</sub> PO <sub>4</sub> |
| 489.7000 <sup>+2</sup> | y <sub>8</sub> <sup>+2</sup>                                  | 819.9154 <sup>+2</sup> | b <sub>18</sub> <sup>+2</sup>                                 | 1127.5404 <sup>+2</sup> | b <sub>25</sub> -H <sub>3</sub> PO <sub>4</sub> <sup>+2</sup> | 1496.7492               | b <sub>16</sub>                                               | 2409.1429 | y <sub>25</sub> -H <sub>3</sub> PO <sub>4</sub> |
| 496.2514               | y <sub>4</sub>                                                | 824.8817 <sup>+2</sup> | y <sub>18</sub> -H <sub>3</sub> PO <sub>4</sub> <sup>+2</sup> | 1133.0128 <sup>+2</sup> | b <sub>24</sub> <sup>+2</sup>                                 | 1534.6533               | y <sub>16</sub>                                               | 2410.0671 | y <sub>24</sub>                                 |
| 507.7720 <sup>+2</sup> | b <sub>10</sub> <sup>+2</sup>                                 | 825.3438 <sup>+2</sup> | y <sub>17</sub> <sup>+2</sup>                                 | 1141.5079 <sup>+2</sup> | y <sub>23</sub> <sup>+2</sup>                                 | 1551.7034               | y <sub>17</sub> -H <sub>3</sub> PO <sub>4</sub>               | 2488.1739 | b <sub>27</sub> -H <sub>3</sub> PO <sub>4</sub> |
| 512.7383 <sup>+2</sup> | y <sub>10</sub> -H <sub>3</sub> PO <sub>4</sub> <sup>+2</sup> | 860.4003 <sup>+2</sup> | y <sub>19</sub> -H <sub>3</sub> PO <sub>4</sub> <sup>+2</sup> | 1156.5487 <sup>+2</sup> | y <sub>24</sub> -H <sub>3</sub> PO <sub>4</sub> <sup>+2</sup> | 1567.7863               | b <sub>17</sub>                                               | 2499.1188 | b <sub>26</sub>                                 |
| 518.2108 <sup>+2</sup> | y <sub>9</sub> <sup>+2</sup>                                  | 863.4314 <sup>+2</sup> | b <sub>19</sub> <sup>+2</sup>                                 | 1166.5436               | y <sub>12</sub> -H <sub>3</sub> PO <sub>4</sub>               | 1638.8234               | b <sub>18</sub>                                               | 2507.1198 | y <sub>25</sub>                                 |
| 548.2569 <sup>+2</sup> | y <sub>11</sub> -H <sub>3</sub> PO <sub>4</sub> <sup>+2</sup> | 873.8702 <sup>+2</sup> | y <sub>18</sub> <sup>+2</sup>                                 | 1176.5288 <sup>+2</sup> | b <sub>25</sub> <sup>+2</sup>                                 | 1648.7562               | y <sub>18</sub> -H <sub>3</sub> PO <sub>4</sub>               | 2508.2114 | y <sub>26</sub> -H <sub>3</sub> PO <sub>4</sub> |
| 556.2984 <sup>+2</sup> | b <sub>11</sub> <sup>+2</sup>                                 | 880.4159               | y <sub>8</sub> -H <sub>3</sub> PO <sub>4</sub>                | 1193.4834               | y <sub>11</sub>                                               | 1649.6803               | y <sub>17</sub>                                               | 2586.1508 | b <sub>27</sub>                                 |
| 561.7268 <sup>+2</sup> | y <sub>10</sub> <sup>+2</sup>                                 | 891.9421 <sup>+2</sup> | b <sub>20</sub> <sup>+2</sup>                                 | 1201.0746 <sup>+2</sup> | b <sub>26</sub> -H <sub>3</sub> PO <sub>4</sub> <sup>+2</sup> | 1719.7933               | y <sub>19</sub> -H <sub>3</sub> PO <sub>4</sub>               | 2605.2641 | y <sub>27</sub> -H <sub>3</sub> PO <sub>4</sub> |
| 583.7755 <sup>+2</sup> | y <sub>12</sub> -H <sub>3</sub> PO <sub>4</sub> <sup>+2</sup> | 909.3887 <sup>+2</sup> | y <sub>19</sub> <sup>+2</sup>                                 | 1205.0751 <sup>+2</sup> | y <sub>25</sub> -H <sub>3</sub> PO <sub>4</sub> <sup>+2</sup> | 1725.8555               | b <sub>19</sub>                                               | 2606.1883 | y <sub>26</sub>                                 |
| 597.2453 <sup>+2</sup> | y <sub>11</sub> <sup>+2</sup>                                 | 924.9216 <sup>+2</sup> | y <sub>20</sub> -H <sub>3</sub> PO <sub>4</sub> <sup>+2</sup> | 1205.5372 <sup>+2</sup> | y <sub>24</sub> <sup>+2</sup>                                 | 1746.733                | y <sub>18</sub>                                               | 2662.2856 | MH-H <sub>3</sub> PO <sub>4</sub>               |
| 611.2784               | y <sub>5</sub>                                                | 926.4528 <sup>+2</sup> | b <sub>21</sub> -H <sub>3</sub> PO <sub>4</sub> <sup>+2</sup> | 1226.6164               | b <sub>12</sub>                                               | 1782.8769               | b <sub>20</sub>                                               | 2703.241  | y <sub>27</sub>                                 |
| 613.8118 <sup>+2</sup> | b <sub>12</sub> <sup>+2</sup>                                 | 937.4374               | y <sub>9</sub> -H <sub>3</sub> PO <sub>4</sub>                | 1237.5808               | y <sub>13</sub> -H <sub>3</sub> PO <sub>4</sub>               | 1817.7702               | y <sub>19</sub>                                               | 2760.2625 | MH                                              |

MS/MS Fragmentation of VRGPVPQHVVVEAPDGAAAAASGSsLDSFSR  
 Found in IPI00552905, Isoform 1 of Proline-rich transmembrane protein 3

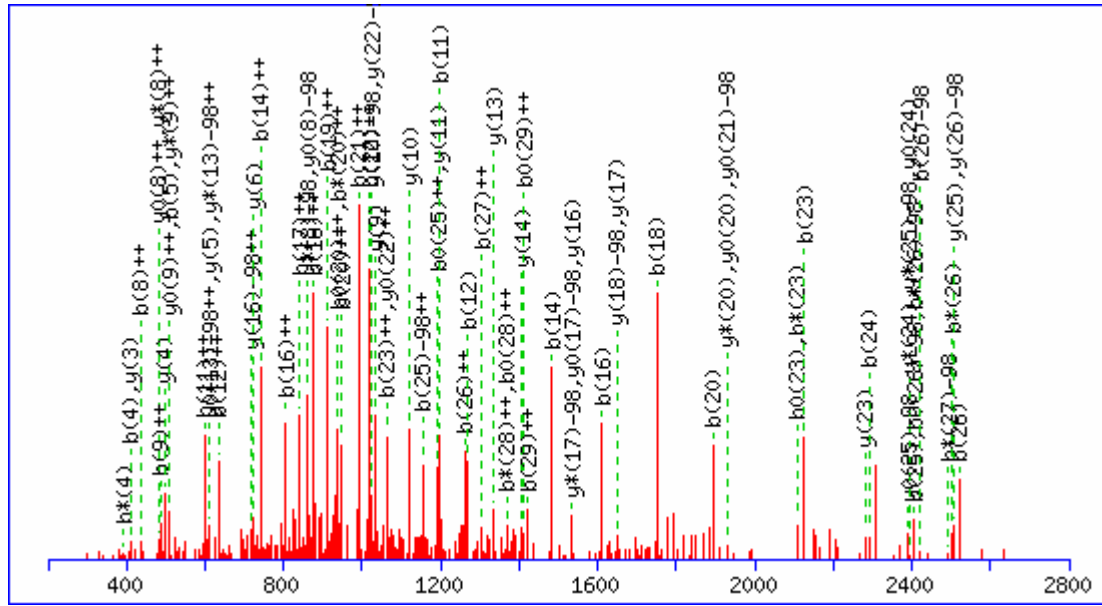

|                        |                                                               |                        |                                                               |                         |                                                               |                         |                                                               |           |                                                 |
|------------------------|---------------------------------------------------------------|------------------------|---------------------------------------------------------------|-------------------------|---------------------------------------------------------------|-------------------------|---------------------------------------------------------------|-----------|-------------------------------------------------|
| 88.0631 <sup>+2</sup>  | y <sub>1</sub> <sup>+2</sup>                                  | 619.2940 <sup>+2</sup> | y <sub>13</sub> -H <sub>3</sub> PO <sub>4</sub> <sup>+2</sup> | 1019.5269 <sup>+2</sup> | b <sub>22</sub> <sup>+2</sup>                                 | 1331.6464 <sup>+2</sup> | y <sub>28</sub> -H <sub>3</sub> PO <sub>4</sub> <sup>+2</sup> | 2046.9727 | y <sub>22</sub> -H <sub>3</sub> PO <sub>4</sub> |
| 128.5920 <sup>+2</sup> | b <sub>2</sub> <sup>+2</sup>                                  | 632.7639 <sup>+2</sup> | y <sub>12</sub> <sup>+2</sup>                                 | 1023.4442 <sup>+2</sup> | y <sub>21</sub> <sup>+2</sup>                                 | 1335.5577               | y <sub>13</sub>                                               | 2107.0679 | b <sub>23</sub> -H <sub>3</sub> PO <sub>4</sub> |
| 131.5791 <sup>+2</sup> | y <sub>2</sub> <sup>+2</sup>                                  | 635.3568 <sup>+2</sup> | b <sub>12</sub> <sup>+2</sup>                                 | 1023.9900 <sup>+2</sup> | y <sub>22</sub> -H <sub>3</sub> PO <sub>4</sub> <sup>+2</sup> | 1352.1241 <sup>+2</sup> | y <sub>27</sub> <sup>+2</sup>                                 | 2144.9496 | y <sub>22</sub>                                 |
| 157.1028 <sup>+2</sup> | b <sub>3</sub> <sup>+2</sup>                                  | 654.8126 <sup>+2</sup> | y <sub>14</sub> -H <sub>3</sub> PO <sub>4</sub> <sup>+2</sup> | 1024.4694               | y <sub>10</sub> -H <sub>3</sub> PO <sub>4</sub>               | 1366.759                | b <sub>13</sub>                                               | 2184.0316 | y <sub>23</sub> -H <sub>3</sub> PO <sub>4</sub> |
| 175.119                | y <sub>1</sub>                                                | 668.2825 <sup>+2</sup> | y <sub>13</sub> <sup>+2</sup>                                 | 1035.4143               | y <sub>9</sub>                                                | 1372.1754 <sup>+2</sup> | b <sub>29</sub> -H <sub>3</sub> PO <sub>4</sub> <sup>+2</sup> | 2194.1    | b <sub>24</sub> -H <sub>3</sub> PO <sub>4</sub> |
| 205.1133 <sup>+2</sup> | y <sub>3</sub> <sup>+2</sup>                                  | 683.8831 <sup>+2</sup> | b <sub>13</sub> <sup>+2</sup>                                 | 1054.0376 <sup>+2</sup> | b <sub>23</sub> -H <sub>3</sub> PO <sub>4</sub> <sup>+2</sup> | 1377.6478 <sup>+2</sup> | b <sub>28</sub> <sup>+2</sup>                                 | 2205.0448 | b <sub>23</sub>                                 |
| 205.6292 <sup>+2</sup> | b <sub>4</sub> <sup>+2</sup>                                  | 690.3311 <sup>+2</sup> | y <sub>15</sub> -H <sub>3</sub> PO <sub>4</sub> <sup>+2</sup> | 1069.6265               | b <sub>10</sub>                                               | 1379.655                | y <sub>15</sub> -H <sub>3</sub> PO <sub>4</sub>               | 2282.0085 | y <sub>23</sub>                                 |
| 248.6293 <sup>+2</sup> | y <sub>4</sub> <sup>+2</sup>                                  | 703.8010 <sup>+2</sup> | y <sub>14</sub> <sup>+2</sup>                                 | 1072.9784 <sup>+2</sup> | y <sub>22</sub> <sup>+2</sup>                                 | 1380.6349 <sup>+2</sup> | y <sub>28</sub> <sup>+2</sup>                                 | 2292.0768 | b <sub>24</sub>                                 |
| 255.1634 <sup>+2</sup> | b <sub>5</sub> <sup>+2</sup>                                  | 718.8419 <sup>+2</sup> | y <sub>16</sub> -H <sub>3</sub> PO <sub>4</sub> <sup>+2</sup> | 1092.5194 <sup>+2</sup> | y <sub>23</sub> -H <sub>3</sub> PO <sub>4</sub> <sup>+2</sup> | 1406.5948               | y <sub>14</sub>                                               | 2307.184  | b <sub>25</sub> -H <sub>3</sub> PO <sub>4</sub> |
| 256.1768               | b <sub>2</sub>                                                | 724.3624               | y <sub>6</sub>                                                | 1095.5065               | y <sub>11</sub> -H <sub>3</sub> PO <sub>4</sub>               | 1409.6970 <sup>+2</sup> | y <sub>29</sub> -H <sub>3</sub> PO <sub>4</sub> <sup>+2</sup> | 2312.0902 | y <sub>24</sub> -H <sub>3</sub> PO <sub>4</sub> |
| 262.151                | y <sub>2</sub>                                                | 734.4308               | b <sub>7</sub>                                                | 1097.5536 <sup>+2</sup> | b <sub>24</sub> -H <sub>3</sub> PO <sub>4</sub> <sup>+2</sup> | 1421.1638 <sup>+2</sup> | b <sub>29</sub> <sup>+2</sup>                                 | 2405.1609 | b <sub>25</sub>                                 |
| 303.6897 <sup>+2</sup> | b <sub>6</sub> <sup>+2</sup>                                  | 739.3196 <sup>+2</sup> | y <sub>15</sub> <sup>+2</sup>                                 | 1103.0260 <sup>+2</sup> | b <sub>23</sub> <sup>+2</sup>                                 | 1436.6764               | y <sub>16</sub> -H <sub>3</sub> PO <sub>4</sub>               | 2409.1429 | y <sub>25</sub> -H <sub>3</sub> PO <sub>4</sub> |
| 306.1428 <sup>+2</sup> | y <sub>5</sub> <sup>+2</sup>                                  | 741.3966 <sup>+2</sup> | b <sub>14</sub> <sup>+2</sup>                                 | 1122.4463               | y <sub>10</sub>                                               | 1458.6854 <sup>+2</sup> | y <sub>29</sub> <sup>+2</sup>                                 | 2410.0671 | y <sub>24</sub>                                 |
| 313.1983               | b <sub>3</sub>                                                | 767.8303 <sup>+2</sup> | y <sub>16</sub> <sup>+2</sup>                                 | 1141.5079 <sup>+2</sup> | b <sub>23</sub> <sup>+2</sup>                                 | 1459.2312 <sup>+2</sup> | MH-H <sub>3</sub> PO <sub>4</sub> <sup>+2</sup>               | 2422.211  | b <sub>26</sub> -H <sub>3</sub> PO <sub>4</sub> |
| 362.6849 <sup>+2</sup> | y <sub>6</sub> <sup>+2</sup>                                  | 769.9073 <sup>+2</sup> | b <sub>15</sub> <sup>+2</sup>                                 | 1146.5421 <sup>+2</sup> | b <sub>24</sub> <sup>+2</sup>                                 | 1477.6319               | y <sub>15</sub>                                               | 2507.1198 | y <sub>25</sub>                                 |
| 367.7190 <sup>+2</sup> | b <sub>7</sub> <sup>+2</sup>                                  | 776.3553 <sup>+2</sup> | y <sub>17</sub> -H <sub>3</sub> PO <sub>4</sub> <sup>+2</sup> | 1154.0956 <sup>+2</sup> | b <sub>25</sub> -H <sub>3</sub> PO <sub>4</sub> <sup>+2</sup> | 1481.7859               | b <sub>14</sub>                                               | 2508.2114 | y <sub>26</sub> -H <sub>3</sub> PO <sub>4</sub> |
| 406.2009 <sup>+2</sup> | y <sub>7</sub> <sup>+2</sup>                                  | 805.4259 <sup>+2</sup> | b <sub>16</sub> <sup>+2</sup>                                 | 1156.5487 <sup>+2</sup> | y <sub>24</sub> -H <sub>3</sub> PO <sub>4</sub> <sup>+2</sup> | 1508.2196 <sup>+2</sup> | MH <sup>+2</sup>                                              | 2509.243  | b <sub>27</sub> -H <sub>3</sub> PO <sub>4</sub> |
| 409.2194               | y <sub>3</sub>                                                | 811.3945               | y <sub>7</sub>                                                | 1166.5436               | y <sub>12</sub> -H <sub>3</sub> PO <sub>4</sub>               | 1534.6533               | y <sub>16</sub>                                               | 2520.1879 | b <sub>26</sub>                                 |
| 410.251                | b <sub>4</sub>                                                | 824.8817 <sup>+2</sup> | y <sub>18</sub> -H <sub>3</sub> PO <sub>4</sub> <sup>+2</sup> | 1193.4834               | y <sub>11</sub>                                               | 1538.8074               | b <sub>15</sub>                                               | 2605.2641 | y <sub>27</sub> -H <sub>3</sub> PO <sub>4</sub> |
| 436.2485 <sup>+2</sup> | b <sub>8</sub> <sup>+2</sup>                                  | 825.3438 <sup>+2</sup> | y <sub>17</sub> <sup>+2</sup>                                 | 1198.6691               | b <sub>11</sub>                                               | 1551.7034               | y <sub>17</sub> -H <sub>3</sub> PO <sub>4</sub>               | 2606.1883 | y <sub>26</sub>                                 |
| 440.7116 <sup>+2</sup> | y <sub>8</sub> -H <sub>3</sub> PO <sub>4</sub> <sup>+2</sup>  | 840.9445 <sup>+2</sup> | b <sub>17</sub> <sup>+2</sup>                                 | 1203.0841 <sup>+2</sup> | b <sub>25</sub> <sup>+2</sup>                                 | 1609.8445               | b <sub>16</sub>                                               | 2607.2199 | b <sub>27</sub>                                 |
| 469.2223 <sup>+2</sup> | y <sub>9</sub> -H <sub>3</sub> PO <sub>4</sub> <sup>+2</sup>  | 860.4003 <sup>+2</sup> | y <sub>19</sub> -H <sub>3</sub> PO <sub>4</sub> <sup>+2</sup> | 1205.0751 <sup>+2</sup> | y <sub>25</sub> -H <sub>3</sub> PO <sub>4</sub> <sup>+2</sup> | 1648.7562               | y <sub>18</sub> -H <sub>3</sub> PO <sub>4</sub>               | 2656.3114 | b <sub>28</sub> -H <sub>3</sub> PO <sub>4</sub> |
| 485.7827 <sup>+2</sup> | b <sub>9</sub> <sup>+2</sup>                                  | 871.4897               | b <sub>8</sub>                                                | 1205.5372 <sup>+2</sup> | y <sub>24</sub> <sup>+2</sup>                                 | 1649.6803               | y <sub>17</sub>                                               | 2662.2856 | y <sub>28</sub> -H <sub>3</sub> PO <sub>4</sub> |
| 489.7000 <sup>+2</sup> | y <sub>8</sub> <sup>+2</sup>                                  | 873.8702 <sup>+2</sup> | y <sub>18</sub> <sup>+2</sup>                                 | 1211.6091 <sup>+2</sup> | b <sub>26</sub> -H <sub>3</sub> PO <sub>4</sub> <sup>+2</sup> | 1680.8816               | b <sub>17</sub>                                               | 2703.241  | y <sub>27</sub>                                 |
| 496.2514               | y <sub>4</sub>                                                | 876.4630 <sup>+2</sup> | b <sub>18</sub> <sup>+2</sup>                                 | 1237.5808               | y <sub>13</sub> -H <sub>3</sub> PO <sub>4</sub>               | 1719.7933               | y <sub>19</sub> -H <sub>3</sub> PO <sub>4</sub>               | 2743.3434 | b <sub>29</sub> -H <sub>3</sub> PO <sub>4</sub> |
| 509.3194               | b <sub>5</sub>                                                | 880.4159               | y <sub>8</sub> -H <sub>3</sub> PO <sub>4</sub>                | 1254.0636 <sup>+2</sup> | y <sub>25</sub> <sup>+2</sup>                                 | 1746.733                | y <sub>18</sub>                                               | 2754.2883 | b <sub>28</sub>                                 |
| 512.7383 <sup>+2</sup> | y <sub>10</sub> -H <sub>3</sub> PO <sub>4</sub> <sup>+2</sup> | 909.3887 <sup>+2</sup> | y <sub>19</sub> <sup>+2</sup>                                 | 1254.6093 <sup>+2</sup> | y <sub>26</sub> -H <sub>3</sub> PO <sub>4</sub> <sup>+2</sup> | 1751.9187               | b <sub>18</sub>                                               | 2760.2625 | y <sub>28</sub>                                 |
| 518.2108 <sup>+2</sup> | y <sub>9</sub> <sup>+2</sup>                                  | 911.9816 <sup>+2</sup> | b <sub>19</sub> <sup>+2</sup>                                 | 1255.1251 <sup>+2</sup> | b <sub>27</sub> -H <sub>3</sub> PO <sub>4</sub> <sup>+2</sup> | 1817.7702               | y <sub>19</sub>                                               | 2818.3867 | y <sub>29</sub> -H <sub>3</sub> PO <sub>4</sub> |
| 535.3169 <sup>+2</sup> | b <sub>10</sub> <sup>+2</sup>                                 | 924.9216 <sup>+2</sup> | y <sub>20</sub> -H <sub>3</sub> PO <sub>4</sub> <sup>+2</sup> | 1260.5976 <sup>+2</sup> | b <sub>26</sub> <sup>+2</sup>                                 | 1822.9559               | b <sub>19</sub>                                               | 2841.3203 | b <sub>29</sub>                                 |
| 548.2569 <sup>+2</sup> | y <sub>11</sub> -H <sub>3</sub> PO <sub>4</sub> <sup>+2</sup> | 937.4374               | y <sub>9</sub> -H <sub>3</sub> PO <sub>4</sub>                | 1264.5205               | y <sub>12</sub>                                               | 1848.8359               | y <sub>20</sub> -H <sub>3</sub> PO <sub>4</sub>               | 2916.3636 | y <sub>29</sub>                                 |
| 561.7268 <sup>+2</sup> | y <sub>10</sub> <sup>+2</sup>                                 | 947.5001 <sup>+2</sup> | b <sub>20</sub> <sup>+2</sup>                                 | 1269.7062               | b <sub>12</sub>                                               | 1893.993                | b <sub>20</sub>                                               | 2917.4551 | MH-H <sub>3</sub> PO <sub>4</sub>               |
| 583.7755 <sup>+2</sup> | y <sub>12</sub> -H <sub>3</sub> PO <sub>4</sub> <sup>+2</sup> | 970.5581               | b <sub>9</sub>                                                | 1303.1357 <sup>+2</sup> | y <sub>27</sub> -H <sub>3</sub> PO <sub>4</sub> <sup>+2</sup> | 1946.8128               | y <sub>20</sub>                                               | 3015.432  | MH                                              |
| 597.2453 <sup>+2</sup> | y <sub>11</sub> <sup>+2</sup>                                 | 973.9100 <sup>+2</sup> | y <sub>20</sub> <sup>+2</sup>                                 | 1303.5978 <sup>+2</sup> | y <sub>26</sub> <sup>+2</sup>                                 | 1947.9043               | y <sub>21</sub> -H <sub>3</sub> PO <sub>4</sub>               |           |                                                 |
| 599.8382 <sup>+2</sup> | b <sub>11</sub> <sup>+2</sup>                                 | 974.4558 <sup>+2</sup> | y <sub>21</sub> -H <sub>3</sub> PO <sub>4</sub> <sup>+2</sup> | 1304.1136 <sup>+2</sup> | b <sub>27</sub> <sup>+2</sup>                                 | 1981.025                | b <sub>21</sub>                                               |           |                                                 |
| 606.3722               | b <sub>6</sub>                                                | 978.3928               | y <sub>8</sub>                                                | 1308.6179               | y <sub>14</sub> -H <sub>3</sub> PO <sub>4</sub>               | 2038.0465               | b <sub>22</sub>                                               |           |                                                 |
| 611.2784               | y <sub>5</sub>                                                | 991.0161 <sup>+2</sup> | b <sub>21</sub> <sup>+2</sup>                                 | 1328.6593 <sup>+2</sup> | b <sub>28</sub> -H <sub>3</sub> PO <sub>4</sub> <sup>+2</sup> | 2045.8812               | y <sub>21</sub>                                               |           |                                                 |

MS/MS Fragmentation of AQTPPISSLPtSPSDEVGR  
 Found in IPI00022479, guanine nucleotide exchange factor p532

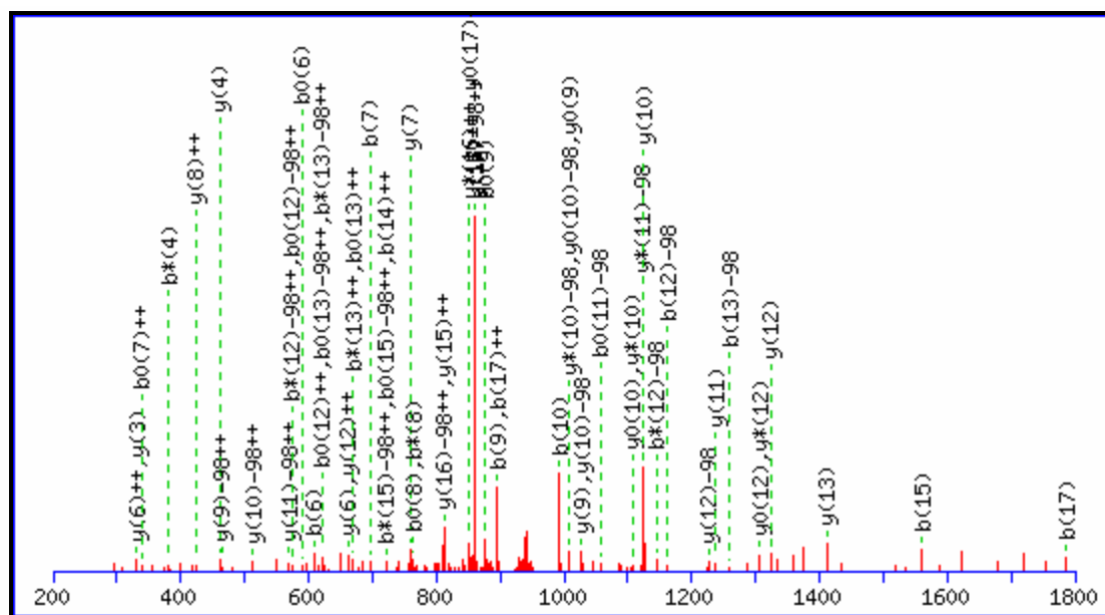

|                        |                                                              |                        |                                                               |                         |                                                               |           |                                                 |           |                                                 |
|------------------------|--------------------------------------------------------------|------------------------|---------------------------------------------------------------|-------------------------|---------------------------------------------------------------|-----------|-------------------------------------------------|-----------|-------------------------------------------------|
| 88.0631 <sup>+2</sup>  | y <sub>1</sub> <sup>+2</sup>                                 | 513.7462 <sup>+2</sup> | y <sub>10</sub> -H <sub>3</sub> PO <sub>4</sub> <sup>+2</sup> | 782.4043                | b <sub>8</sub>                                                | 1124.462  | y <sub>10</sub>                                 | 1524.6941 | y <sub>14</sub>                                 |
| 116.5738 <sup>+2</sup> | y <sub>2</sub> <sup>+2</sup>                                 | 514.2082 <sup>+2</sup> | y <sub>9</sub> <sup>+2</sup>                                  | 810.9150 <sup>+2</sup>  | y <sub>16</sub> -H <sub>3</sub> PO <sub>4</sub> <sup>+2</sup> | 1139.5691 | y <sub>11</sub> -H <sub>3</sub> PO <sub>4</sub> | 1559.6989 | b <sub>15</sub>                                 |
| 166.1081 <sup>+2</sup> | y <sub>3</sub> <sup>+2</sup>                                 | 562.7346 <sup>+2</sup> | y <sub>10</sub> <sup>+2</sup>                                 | 811.3771 <sup>+2</sup>  | y <sub>15</sub> <sup>+2</sup>                                 | 1162.6103 | b <sub>12</sub> -H <sub>3</sub> PO <sub>4</sub> | 1590.7646 | b <sub>16</sub> -H <sub>3</sub> PO <sub>4</sub> |
| 175.119                | y <sub>1</sub>                                               | 570.2882 <sup>+2</sup> | y <sub>11</sub> -H <sub>3</sub> PO <sub>4</sub> <sup>+2</sup> | 846.3952                | y <sub>8</sub>                                                | 1173.5551 | b <sub>11</sub>                                 | 1620.8228 | y <sub>16</sub> -H <sub>3</sub> PO <sub>4</sub> |
| 200.103                | b <sub>2</sub>                                               | 575.2784               | y <sub>5</sub>                                                | 859.9035 <sup>+2</sup>  | y <sub>16</sub> <sup>+2</sup>                                 | 1226.6012 | y <sub>12</sub> -H <sub>3</sub> PO <sub>4</sub> | 1621.7469 | y <sub>15</sub>                                 |
| 230.6293 <sup>+2</sup> | y <sub>4</sub> <sup>+2</sup>                                 | 608.3402               | b <sub>6</sub>                                                | 861.4389 <sup>+2</sup>  | y <sub>17</sub> -H <sub>3</sub> PO <sub>4</sub> <sup>+2</sup> | 1237.546  | y <sub>11</sub>                                 | 1688.7415 | b <sub>16</sub>                                 |
| 232.1404               | y <sub>2</sub>                                               | 613.8042 <sup>+2</sup> | y <sub>12</sub> -H <sub>3</sub> PO <sub>4</sub> <sup>+2</sup> | 895.4884                | b <sub>9</sub>                                                | 1259.663  | b <sub>13</sub> -H <sub>3</sub> PO <sub>4</sub> | 1689.833  | b <sub>17</sub> -H <sub>3</sub> PO <sub>4</sub> |
| 288.1428 <sup>+2</sup> | y <sub>5</sub> <sup>+2</sup>                                 | 619.2766 <sup>+2</sup> | y <sub>11</sub> <sup>+2</sup>                                 | 910.4273 <sup>+2</sup>  | y <sub>17</sub> <sup>+2</sup>                                 | 1260.5872 | b <sub>12</sub>                                 | 1718.7997 | y <sub>16</sub>                                 |
| 301.1506               | b <sub>3</sub>                                               | 657.3202 <sup>+2</sup> | y <sub>13</sub> -H <sub>3</sub> PO <sub>4</sub> <sup>+2</sup> | 925.4682 <sup>+2</sup>  | y <sub>18</sub> -H <sub>3</sub> PO <sub>4</sub> <sup>+2</sup> | 1313.6332 | y <sub>13</sub> -H <sub>3</sub> PO <sub>4</sub> | 1721.8705 | y <sub>17</sub> -H <sub>3</sub> PO <sub>4</sub> |
| 331.2088               | y <sub>3</sub>                                               | 662.3104               | y <sub>6</sub>                                                | 929.4323                | y <sub>9</sub> -H <sub>3</sub> PO <sub>4</sub>                | 1324.5781 | y <sub>12</sub>                                 | 1746.8545 | b <sub>18</sub> -H <sub>3</sub> PO <sub>4</sub> |
| 331.6588 <sup>+2</sup> | y <sub>6</sub> <sup>+2</sup>                                 | 662.7927 <sup>+2</sup> | y <sub>12</sub> <sup>+2</sup>                                 | 960.9867 <sup>+2</sup>  | MH-H <sub>3</sub> PO <sub>4</sub> <sup>+2</sup>               | 1346.6951 | b <sub>14</sub> -H <sub>3</sub> PO <sub>4</sub> | 1787.8099 | b <sub>17</sub>                                 |
| 380.1852 <sup>+2</sup> | y <sub>7</sub> <sup>+2</sup>                                 | 695.3723               | b <sub>7</sub>                                                | 974.4566 <sup>+2</sup>  | y <sub>18</sub> <sup>+2</sup>                                 | 1357.6399 | b <sub>13</sub>                                 | 1819.8474 | y <sub>17</sub>                                 |
| 398.2034               | b <sub>4</sub>                                               | 706.3087 <sup>+2</sup> | y <sub>13</sub> <sup>+2</sup>                                 | 992.5411                | b <sub>10</sub>                                               | 1411.6101 | y <sub>13</sub>                                 | 1844.8314 | b <sub>18</sub>                                 |
| 423.7012 <sup>+2</sup> | y <sub>8</sub> <sup>+2</sup>                                 | 713.8623 <sup>+2</sup> | y <sub>14</sub> -H <sub>3</sub> PO <sub>4</sub> <sup>+2</sup> | 1009.9752 <sup>+2</sup> | MH <sup>+2</sup>                                              | 1426.7172 | y <sub>14</sub> -H <sub>3</sub> PO <sub>4</sub> | 1849.929  | y <sub>18</sub> -H <sub>3</sub> PO <sub>4</sub> |
| 460.2514               | y <sub>4</sub>                                               | 759.3632               | y <sub>7</sub>                                                | 1026.4851               | y <sub>10</sub> -H <sub>3</sub> PO <sub>4</sub>               | 1444.672  | b <sub>14</sub>                                 | 1920.9661 | MH-H <sub>3</sub> PO <sub>4</sub>               |
| 465.2198 <sup>+2</sup> | y <sub>9</sub> -H <sub>3</sub> PO <sub>4</sub> <sup>+2</sup> | 762.3886 <sup>+2</sup> | y <sub>15</sub> -H <sub>3</sub> PO <sub>4</sub> <sup>+2</sup> | 1027.4092               | y <sub>9</sub>                                                | 1461.722  | b <sub>15</sub> -H <sub>3</sub> PO <sub>4</sub> | 1947.9059 | y <sub>18</sub>                                 |
| 495.2562               | b <sub>5</sub>                                               | 762.8507 <sup>+2</sup> | y <sub>14</sub> <sup>+2</sup>                                 | 1075.5782               | b <sub>11</sub> -H <sub>3</sub> PO <sub>4</sub>               | 1523.77   | y <sub>15</sub> -H <sub>3</sub> PO <sub>4</sub> | 2018.943  | MH                                              |



MS/MS Fragmentation of LStSPPPAIAVPLLEmGFSLR  
 Found in IPI00022479, guanine nucleotide exchange factor p532

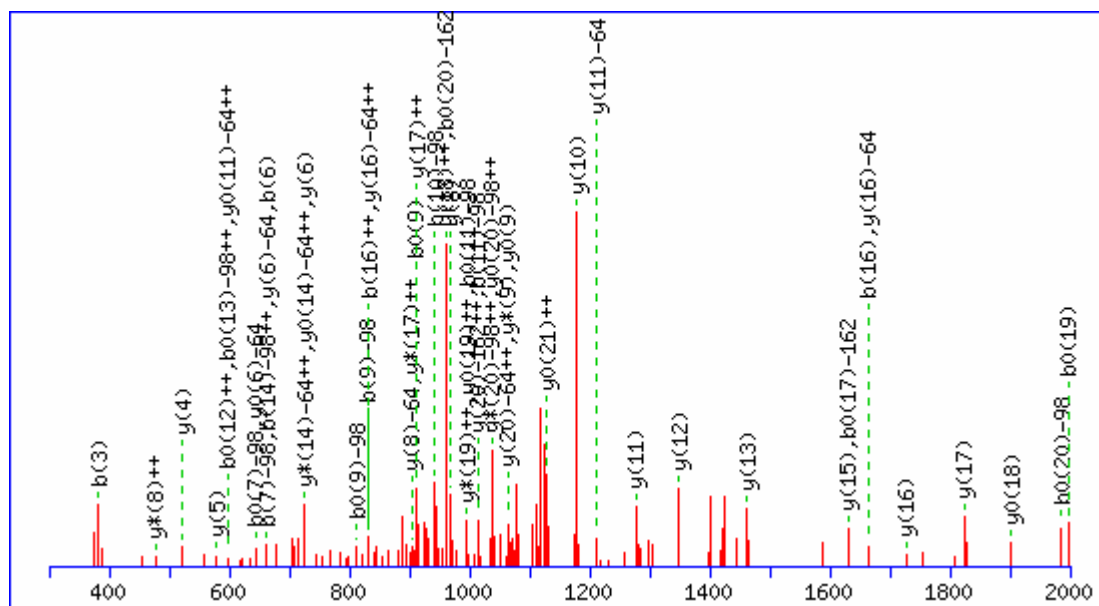

|                        |                                                |                        |                                                |                         |                                                               |                         |                                                 |           |                                                 |
|------------------------|------------------------------------------------|------------------------|------------------------------------------------|-------------------------|---------------------------------------------------------------|-------------------------|-------------------------------------------------|-----------|-------------------------------------------------|
| 88.0631 <sup>+2</sup>  | y <sub>1</sub> <sup>+2</sup>                   | 541.2892 <sup>+2</sup> | y <sub>9</sub> <sup>+2</sup>                   | 863.9817 <sup>+2</sup>  | y <sub>16</sub> <sup>+2</sup>                                 | 1195.1155 <sup>+2</sup> | MH <sup>+2</sup>                                | 1810.9061 | b <sub>17</sub>                                 |
| 144.6051 <sup>+2</sup> | y <sub>2</sub> <sup>+2</sup>                   | 565.298                | b <sub>6</sub> -H <sub>3</sub> PO <sub>4</sub> | 912.5080 <sup>+2</sup>  | y <sub>17</sub> <sup>+2</sup>                                 | 1210.683                | b <sub>13</sub> -H <sub>3</sub> PO <sub>4</sub> | 1824.0088 | y <sub>17</sub>                                 |
| 175.119                | y <sub>1</sub>                                 | 566.2222               | b <sub>5</sub>                                 | 928.4176                | b <sub>9</sub>                                                | 1211.6072               | b <sub>12</sub>                                 | 1867.9275 | b <sub>18</sub>                                 |
| 188.1212 <sup>+2</sup> | y <sub>3</sub> <sup>+2</sup>                   | 579.3249               | y <sub>5</sub>                                 | 943.5247                | b <sub>10</sub> -H <sub>3</sub> PO <sub>4</sub>               | 1277.6922               | y <sub>11</sub>                                 | 1917.019  | b <sub>19</sub> -H <sub>3</sub> PO <sub>4</sub> |
| 201.1234               | b <sub>2</sub>                                 | 589.8155 <sup>+2</sup> | y <sub>10</sub> <sup>+2</sup>                  | 961.0344 <sup>+2</sup>  | y <sub>18</sub> <sup>+2</sup>                                 | 1308.6599               | b <sub>13</sub>                                 | 1921.0616 | y <sub>18</sub>                                 |
| 261.6554 <sup>+2</sup> | y <sub>4</sub> <sup>+2</sup>                   | 639.3497 <sup>+2</sup> | y <sub>11</sub> <sup>+2</sup>                  | 968.487                 | y <sub>8</sub>                                                | 1323.7671               | b <sub>14</sub> -H <sub>3</sub> PO <sub>4</sub> | 2004.0511 | b <sub>20</sub> -H <sub>3</sub> PO <sub>4</sub> |
| 284.1605               | b <sub>3</sub> -H <sub>3</sub> PO <sub>4</sub> | 662.3508               | b <sub>7</sub> -H <sub>3</sub> PO <sub>4</sub> | 1004.5504 <sup>+2</sup> | y <sub>19</sub> <sup>+2</sup>                                 | 1348.7293               | y <sub>12</sub>                                 | 2008.0936 | y <sub>19</sub>                                 |
| 288.203                | y <sub>2</sub>                                 | 663.2749               | b <sub>6</sub>                                 | 1014.5619               | b <sub>11</sub> -H <sub>3</sub> PO <sub>4</sub>               | 1421.744                | b <sub>14</sub>                                 | 2014.9959 | b <sub>19</sub>                                 |
| 290.1661 <sup>+2</sup> | y <sub>5</sub> <sup>+2</sup>                   | 674.8683 <sup>+2</sup> | y <sub>12</sub> <sup>+2</sup>                  | 1041.5016               | b <sub>10</sub>                                               | 1436.8512               | b <sub>15</sub> -H <sub>3</sub> PO <sub>4</sub> | 2091.1307 | y <sub>20</sub> -H <sub>3</sub> PO <sub>4</sub> |
| 363.6838 <sup>+2</sup> | y <sub>6</sub> <sup>+2</sup>                   | 726.3603               | y <sub>6</sub>                                 | 1046.0690 <sup>+2</sup> | y <sub>20</sub> -H <sub>3</sub> PO <sub>4</sub> <sup>+2</sup> | 1461.8134               | y <sub>13</sub>                                 | 2102.028  | b <sub>20</sub>                                 |
| 371.1925               | b <sub>4</sub> -H <sub>3</sub> PO <sub>4</sub> | 731.4103 <sup>+2</sup> | y <sub>13</sub> <sup>+2</sup>                  | 1081.571                | y <sub>9</sub>                                                | 1532.8505               | y <sub>14</sub>                                 | 2117.1351 | b <sub>21</sub> -H <sub>3</sub> PO <sub>4</sub> |
| 375.235                | y <sub>3</sub>                                 | 759.4036               | b <sub>8</sub> -H <sub>3</sub> PO <sub>4</sub> | 1089.5850 <sup>+2</sup> | y <sub>21</sub> -H <sub>3</sub> PO <sub>4</sub> <sup>+2</sup> | 1534.8281               | b <sub>15</sub>                                 | 2178.1627 | y <sub>21</sub> -H <sub>3</sub> PO <sub>4</sub> |
| 382.1374               | b <sub>3</sub>                                 | 760.3277               | b <sub>7</sub>                                 | 1095.0574 <sup>+2</sup> | y <sub>20</sub> <sup>+2</sup>                                 | 1565.8938               | b <sub>16</sub> -H <sub>3</sub> PO <sub>4</sub> | 2189.1076 | y <sub>20</sub>                                 |
| 428.2051 <sup>+2</sup> | y <sub>7</sub> <sup>+2</sup>                   | 766.9289 <sup>+2</sup> | y <sub>14</sub> <sup>+2</sup>                  | 1112.5388               | b <sub>11</sub>                                               | 1629.9033               | y <sub>15</sub>                                 | 2215.112  | b <sub>21</sub>                                 |
| 468.2453               | b <sub>5</sub> -H <sub>3</sub> PO <sub>4</sub> | 815.4553 <sup>+2</sup> | y <sub>15</sub> <sup>+2</sup>                  | 1113.6303               | b <sub>12</sub> -H <sub>3</sub> PO <sub>4</sub>               | 1663.8707               | b <sub>16</sub>                                 | 2276.1396 | y <sub>21</sub>                                 |
| 469.1694               | b <sub>4</sub>                                 | 830.4407               | b <sub>9</sub> -H <sub>3</sub> PO <sub>4</sub> | 1138.5735 <sup>+2</sup> | y <sub>21</sub> <sup>+2</sup>                                 | 1712.9292               | b <sub>17</sub> -H <sub>3</sub> PO <sub>4</sub> | 2291.2468 | MH-H <sub>3</sub> PO <sub>4</sub>               |
| 484.7471 <sup>+2</sup> | y <sub>8</sub> <sup>+2</sup>                   | 855.4029               | y <sub>7</sub>                                 | 1146.1270 <sup>+2</sup> | MH-H <sub>3</sub> PO <sub>4</sub> <sup>+2</sup>               | 1726.956                | y <sub>16</sub>                                 | 2389.2237 | MH                                              |
| 522.3035               | y <sub>4</sub>                                 | 857.3805               | b <sub>8</sub>                                 | 1178.6238               | y <sub>10</sub>                                               | 1769.9506               | b <sub>18</sub> -H <sub>3</sub> PO <sub>4</sub> |           |                                                 |

MS/MS Fragmentation of RVsTDLPEGQDVYTAACNSVIHR  
 Found in IPI00022479, guanine nucleotide exchange factor p532

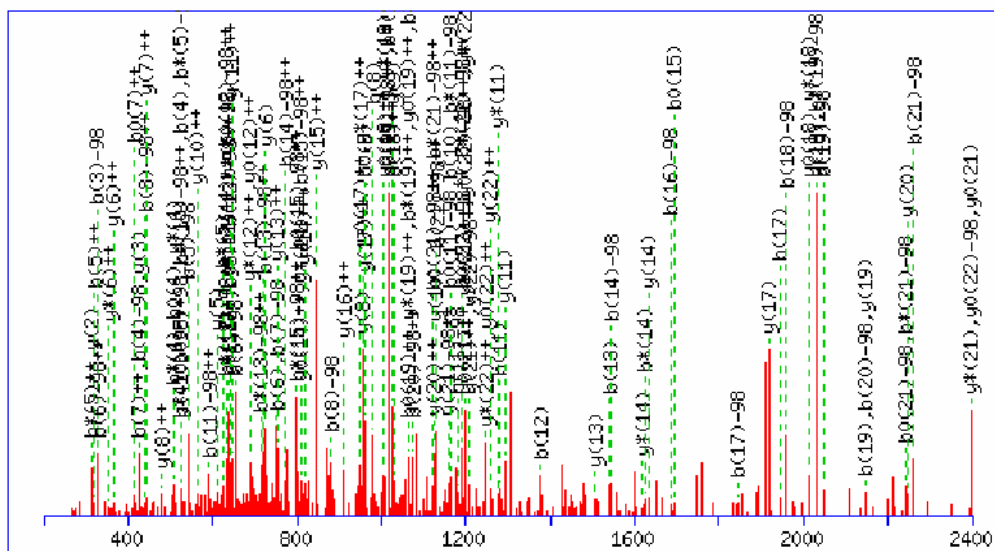

|                        |                                                              |                        |                                                               |                         |                                                               |                         |                                                               |           |                                                 |
|------------------------|--------------------------------------------------------------|------------------------|---------------------------------------------------------------|-------------------------|---------------------------------------------------------------|-------------------------|---------------------------------------------------------------|-----------|-------------------------------------------------|
| 88.0631 <sup>+2</sup>  | y <sub>1</sub> <sup>+2</sup>                                 | 469.2405 <sup>+2</sup> | b <sub>9</sub> -H <sub>3</sub> PO <sub>4</sub> <sup>+2</sup>  | 807.8916 <sup>+2</sup>  | b <sub>15</sub> -H <sub>3</sub> PO <sub>4</sub> <sup>+2</sup> | 1093.9748 <sup>+2</sup> | b <sub>20</sub> <sup>+2</sup>                                 | 1685.8129 | b <sub>16</sub> -H <sub>3</sub> PO <sub>4</sub> |
| 128.5920 <sup>+2</sup> | b <sub>2</sub> <sup>+2</sup>                                 | 485.7480 <sup>+2</sup> | y <sub>9</sub> <sup>+2</sup>                                  | 817.3912 <sup>+2</sup>  | y <sub>15</sub> <sup>+2</sup>                                 | 1095.0182 <sup>+2</sup> | y <sub>20</sub> <sup>+2</sup>                                 | 1712.7527 | b <sub>15</sub>                                 |
| 156.5926 <sup>+2</sup> | y <sub>2</sub> <sup>+2</sup>                                 | 489.7182 <sup>+2</sup> | b <sub>8</sub> <sup>+2</sup>                                  | 821.3614 <sup>+2</sup>  | b <sub>14</sub> <sup>+2</sup>                                 | 1101.5284 <sup>+2</sup> | b <sub>21</sub> -H <sub>3</sub> PO <sub>4</sub> <sup>+2</sup> | 1762.8177 | y <sub>16</sub>                                 |
| 163.1028 <sup>+2</sup> | b <sub>3</sub> -H <sub>3</sub> PO <sub>4</sub> <sup>+2</sup> | 518.2290 <sup>+2</sup> | b <sub>9</sub> <sup>+2</sup>                                  | 828.4145                | y <sub>7</sub>                                                | 1129.5289 <sup>+2</sup> | y <sub>21</sub> -H <sub>3</sub> PO <sub>4</sub> <sup>+2</sup> | 1783.7898 | b <sub>16</sub>                                 |
| 175.119                | y <sub>1</sub>                                               | 524.2228               | b <sub>4</sub>                                                | 843.4101 <sup>+2</sup>  | b <sub>16</sub> -H <sub>3</sub> PO <sub>4</sub> <sup>+2</sup> | 1150.5169 <sup>+2</sup> | b <sub>21</sub> <sup>+2</sup>                                 | 1788.8221 | b <sub>17</sub> -H <sub>3</sub> PO <sub>4</sub> |
| 212.0912 <sup>+2</sup> | b <sub>3</sub> <sup>+2</sup>                                 | 524.3303               | y <sub>4</sub>                                                | 849.3866                | b <sub>7</sub>                                                | 1163.5092               | b <sub>10</sub>                                               | 1859.8705 | y <sub>17</sub>                                 |
| 213.1346 <sup>+2</sup> | y <sub>3</sub> <sup>+2</sup>                                 | 533.2698 <sup>+2</sup> | b <sub>10</sub> -H <sub>3</sub> PO <sub>4</sub> <sup>+2</sup> | 856.8800 <sup>+2</sup>  | b <sub>15</sub> <sup>+2</sup>                                 | 1170.0579 <sup>+2</sup> | b <sub>22</sub> -H <sub>3</sub> PO <sub>4</sub> <sup>+2</sup> | 1886.799  | b <sub>17</sub>                                 |
| 213.6266 <sup>+2</sup> | b <sub>4</sub> -H <sub>3</sub> PO <sub>4</sub> <sup>+2</sup> | 536.2718 <sup>+2</sup> | y <sub>10</sub> <sup>+2</sup>                                 | 880.4523                | b <sub>8</sub> -H <sub>3</sub> PO <sub>4</sub>                | 1178.5174 <sup>+2</sup> | y <sub>21</sub> <sup>+2</sup>                                 | 1902.8651 | b <sub>18</sub> -H <sub>3</sub> PO <sub>4</sub> |
| 256.1768               | b <sub>2</sub>                                               | 541.2729               | b <sub>5</sub> -H <sub>3</sub> PO <sub>4</sub>                | 881.9125 <sup>+2</sup>  | y <sub>16</sub> <sup>+2</sup>                                 | 1179.0632 <sup>+2</sup> | y <sub>22</sub> -H <sub>3</sub> PO <sub>4</sub> <sup>+2</sup> | 1972.9545 | y <sub>18</sub>                                 |
| 262.6151 <sup>+2</sup> | b <sub>3</sub> <sup>+2</sup>                                 | 582.2583 <sup>+2</sup> | b <sub>10</sub> <sup>+2</sup>                                 | 892.3986 <sup>+2</sup>  | b <sub>16</sub> <sup>+2</sup>                                 | 1180.5593               | b <sub>11</sub> -H <sub>3</sub> PO <sub>4</sub>               | 1989.8971 | b <sub>19</sub> -H <sub>3</sub> PO <sub>4</sub> |
| 262.6688 <sup>+2</sup> | y <sub>4</sub> <sup>+2</sup>                                 | 590.7833 <sup>+2</sup> | b <sub>11</sub> -H <sub>3</sub> PO <sub>4</sub> <sup>+2</sup> | 894.9147 <sup>+2</sup>  | b <sub>17</sub> -H <sub>3</sub> PO <sub>4</sub> <sup>+2</sup> | 1219.0463 <sup>+2</sup> | b <sub>22</sub> <sup>+2</sup>                                 | 2000.8419 | b <sub>18</sub>                                 |
| 271.1401 <sup>+2</sup> | b <sub>5</sub> -H <sub>3</sub> PO <sub>4</sub> <sup>+2</sup> | 611.3624               | y <sub>5</sub>                                                | 899.4516                | y <sub>8</sub>                                                | 1228.0516 <sup>+2</sup> | y <sub>22</sub> <sup>+2</sup>                                 | 2087.874  | b <sub>19</sub>                                 |
| 306.1848 <sup>+2</sup> | y <sub>5</sub> <sup>+2</sup>                                 | 617.8035 <sup>+2</sup> | y <sub>11</sub> <sup>+2</sup>                                 | 930.4389 <sup>+2</sup>  | y <sub>17</sub> <sup>+2</sup>                                 | 1234.5997               | y <sub>11</sub>                                               | 2087.9815 | y <sub>19</sub>                                 |
| 312.1779               | y <sub>2</sub>                                               | 639.2498               | b <sub>5</sub>                                                | 937.4738                | b <sub>9</sub> -H <sub>3</sub> PO <sub>4</sub>                | 1257.1137 <sup>+2</sup> | MH-H <sub>3</sub> PO <sub>4</sub> <sup>+2</sup>               | 2088.9655 | b <sub>20</sub> -H <sub>3</sub> PO <sub>4</sub> |
| 320.1285 <sup>+2</sup> | b <sub>5</sub> <sup>+2</sup>                                 | 639.7717 <sup>+2</sup> | b <sub>11</sub> <sup>+2</sup>                                 | 943.9031 <sup>+2</sup>  | b <sub>17</sub> <sup>+2</sup>                                 | 1278.5362               | b <sub>11</sub>                                               | 2186.9424 | b <sub>20</sub>                                 |
| 325.1983               | b <sub>3</sub> -H <sub>3</sub> PO <sub>4</sub>               | 640.3175 <sup>+2</sup> | b <sub>12</sub> -H <sub>3</sub> PO <sub>4</sub> <sup>+2</sup> | 951.9362 <sup>+2</sup>  | b <sub>18</sub> -H <sub>3</sub> PO <sub>4</sub> <sup>+2</sup> | 1279.6277               | b <sub>12</sub> -H <sub>3</sub> PO <sub>4</sub>               | 2189.0292 | y <sub>20</sub>                                 |
| 327.6821 <sup>+2</sup> | b <sub>6</sub> -H <sub>3</sub> PO <sub>4</sub> <sup>+2</sup> | 654.357                | b <sub>6</sub> -H <sub>3</sub> PO <sub>4</sub>                | 970.4887                | y <sub>9</sub>                                                | 1306.1022 <sup>+2</sup> | MH <sup>+2</sup>                                              | 2202.0496 | b <sub>21</sub> -H <sub>3</sub> PO <sub>4</sub> |
| 363.2063 <sup>+2</sup> | y <sub>6</sub> <sup>+2</sup>                                 | 667.3377 <sup>+2</sup> | y <sub>12</sub> <sup>+2</sup>                                 | 978.4292                | b <sub>8</sub>                                                | 1333.6681               | y <sub>12</sub>                                               | 2258.0506 | y <sub>21</sub> -H <sub>3</sub> PO <sub>4</sub> |
| 376.2085 <sup>+2</sup> | b <sub>7</sub> -H <sub>3</sub> PO <sub>4</sub> <sup>+2</sup> | 689.3059 <sup>+2</sup> | b <sub>12</sub> <sup>+2</sup>                                 | 986.9809 <sup>+2</sup>  | y <sub>18</sub> <sup>+2</sup>                                 | 1377.6046               | b <sub>12</sub>                                               | 2300.0265 | b <sub>21</sub>                                 |
| 376.6706 <sup>+2</sup> | b <sub>6</sub> <sup>+2</sup>                                 | 721.8492 <sup>+2</sup> | b <sub>13</sub> -H <sub>3</sub> PO <sub>4</sub> <sup>+2</sup> | 995.4522 <sup>+2</sup>  | b <sub>19</sub> -H <sub>3</sub> PO <sub>4</sub> <sup>+2</sup> | 1442.691                | b <sub>13</sub> -H <sub>3</sub> PO <sub>4</sub>               | 2339.1085 | b <sub>22</sub> -H <sub>3</sub> PO <sub>4</sub> |
| 414.7109 <sup>+2</sup> | y <sub>7</sub> <sup>+2</sup>                                 | 724.8512 <sup>+2</sup> | y <sub>13</sub> <sup>+2</sup>                                 | 1000.9246 <sup>+2</sup> | b <sub>18</sub> <sup>+2</sup>                                 | 1448.6951               | y <sub>13</sub>                                               | 2356.0275 | y <sub>21</sub>                                 |
| 423.1752               | b <sub>3</sub>                                               | 725.4053               | y <sub>6</sub>                                                | 1035.4507               | b <sub>9</sub>                                                | 1540.6679               | b <sub>13</sub>                                               | 2357.119  | y <sub>22</sub> -H <sub>3</sub> PO <sub>4</sub> |
| 425.1969 <sup>+2</sup> | b <sub>7</sub> <sup>+2</sup>                                 | 751.4097               | b <sub>7</sub> -H <sub>3</sub> PO <sub>4</sub>                | 1044.4406 <sup>+2</sup> | b <sub>19</sub> <sup>+2</sup>                                 | 1543.7387               | b <sub>14</sub> -H <sub>3</sub> PO <sub>4</sub>               | 2437.0854 | b <sub>22</sub>                                 |
| 425.2619               | y <sub>3</sub>                                               | 752.3338               | b <sub>6</sub>                                                | 1044.4944 <sup>+2</sup> | y <sub>19</sub> <sup>+2</sup>                                 | 1576.7537               | y <sub>14</sub>                                               | 2455.0959 | y <sub>22</sub>                                 |
| 426.2459               | b <sub>4</sub> -H <sub>3</sub> PO <sub>4</sub>               | 770.8376 <sup>+2</sup> | b <sub>13</sub> <sup>+2</sup>                                 | 1044.9864 <sup>+2</sup> | b <sub>20</sub> -H <sub>3</sub> PO <sub>4</sub> <sup>+2</sup> | 1614.7758               | b <sub>15</sub> -H <sub>3</sub> PO <sub>4</sub>               | 2513.2201 | MH-H <sub>3</sub> PO <sub>4</sub>               |
| 440.7298 <sup>+2</sup> | b <sub>8</sub> -H <sub>3</sub> PO <sub>4</sub> <sup>+2</sup> | 772.3730 <sup>+2</sup> | b <sub>14</sub> -H <sub>3</sub> PO <sub>4</sub> <sup>+2</sup> | 1065.5323               | b <sub>10</sub> -H <sub>3</sub> PO <sub>4</sub>               | 1633.7751               | y <sub>15</sub>                                               | 2611.197  | MH                                              |
| 450.2294 <sup>+2</sup> | y <sub>8</sub> <sup>+2</sup>                                 | 788.8805 <sup>+2</sup> | y <sub>14</sub> <sup>+2</sup>                                 | 1071.5364               | y <sub>10</sub>                                               | 1641.7156               | b <sub>14</sub>                                               |           |                                                 |

MS/MS Fragmentation of ASsFSGISILTR  
 Found in IPI00007227, R3H domain containing 2

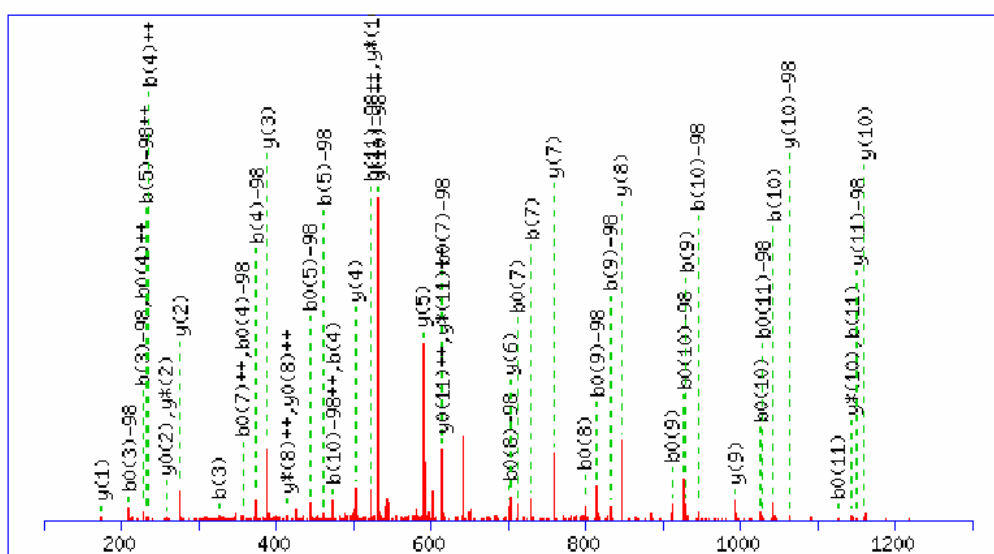

|                        |                                                |                        |                                                |                        |                                                               |          |                                                 |           |                                                 |
|------------------------|------------------------------------------------|------------------------|------------------------------------------------|------------------------|---------------------------------------------------------------|----------|-------------------------------------------------|-----------|-------------------------------------------------|
| 88.0631 <sup>+2</sup>  | y <sub>1</sub> <sup>+2</sup>                   | 351.7291 <sup>+2</sup> | y <sub>6</sub> <sup>+2</sup>                   | 531.8007 <sup>+2</sup> | y <sub>10</sub> -H <sub>3</sub> PO <sub>4</sub> <sup>+2</sup> | 702.4509 | y <sub>6</sub>                                  | 1043.4809 | b <sub>10</sub>                                 |
| 138.5870 <sup>+2</sup> | y <sub>2</sub> <sup>+2</sup>                   | 375.1663               | b <sub>4</sub> -H <sub>3</sub> PO <sub>4</sub> | 560.1752               | b <sub>5</sub>                                                | 719.3359 | b <sub>8</sub> -H <sub>3</sub> PO <sub>4</sub>  | 1046.5517 | b <sub>11</sub> -H <sub>3</sub> PO <sub>4</sub> |
| 159.0764               | b <sub>2</sub>                                 | 380.2398 <sup>+2</sup> | y <sub>7</sub> <sup>+2</sup>                   | 575.3168 <sup>+2</sup> | y <sub>11</sub> -H <sub>3</sub> PO <sub>4</sub> <sup>+2</sup> | 730.2807 | b <sub>7</sub>                                  | 1062.5942 | y <sub>10</sub> -H <sub>3</sub> PO <sub>4</sub> |
| 175.119                | y <sub>1</sub>                                 | 389.2507               | y <sub>3</sub>                                 | 580.7892 <sup>+2</sup> | y <sub>10</sub> <sup>+2</sup>                                 | 759.4723 | y <sub>7</sub>                                  | 1144.5286 | b <sub>11</sub>                                 |
| 195.1290 <sup>+2</sup> | y <sub>3</sub> <sup>+2</sup>                   | 423.7558 <sup>+2</sup> | y <sub>8</sub> <sup>+2</sup>                   | 589.3668               | y <sub>5</sub>                                                | 817.3128 | b <sub>8</sub>                                  | 1149.6262 | y <sub>11</sub> -H <sub>3</sub> PO <sub>4</sub> |
| 228.0979               | b <sub>3</sub> -H <sub>3</sub> PO <sub>4</sub> | 462.1983               | b <sub>5</sub> -H <sub>3</sub> PO <sub>4</sub> | 610.8353 <sup>+2</sup> | MH-H <sub>3</sub> PO <sub>4</sub> <sup>+2</sup>               | 832.4199 | b <sub>9</sub> -H <sub>3</sub> PO <sub>4</sub>  | 1160.5711 | y <sub>10</sub>                                 |
| 251.6710 <sup>+2</sup> | y <sub>4</sub> <sup>+2</sup>                   | 473.1432               | b <sub>4</sub>                                 | 617.1967               | b <sub>6</sub>                                                | 846.5043 | y <sub>8</sub>                                  | 1220.6634 | MH-H <sub>3</sub> PO <sub>4</sub>               |
| 276.1666               | y <sub>2</sub>                                 | 497.2900 <sup>+2</sup> | y <sub>9</sub> <sup>+2</sup>                   | 624.3052 <sup>+2</sup> | y <sub>11</sub> <sup>+2</sup>                                 | 930.3968 | b <sub>9</sub>                                  | 1247.6031 | y <sub>11</sub>                                 |
| 295.1870 <sup>+2</sup> | y <sub>5</sub> <sup>+2</sup>                   | 502.3348               | y <sub>4</sub>                                 | 632.3039               | b <sub>7</sub> -H <sub>3</sub> PO <sub>4</sub>                | 945.504  | b <sub>10</sub> -H <sub>3</sub> PO <sub>4</sub> | 1318.6403 | MH                                              |
| 326.0748               | b <sub>3</sub>                                 | 519.2198               | b <sub>6</sub> -H <sub>3</sub> PO <sub>4</sub> | 659.8238 <sup>+2</sup> | MH <sup>+2</sup>                                              | 993.5728 | y <sub>9</sub>                                  |           |                                                 |

MS/MS Fragmentation of LNtSDFQK  
 Found in IPI00306195, CDNA FLJ30949 fis, clone HCASM1000021,  
 weakly similar to Plasmodium berghei strain NYU2 merozoite surface protein-1 mRNA

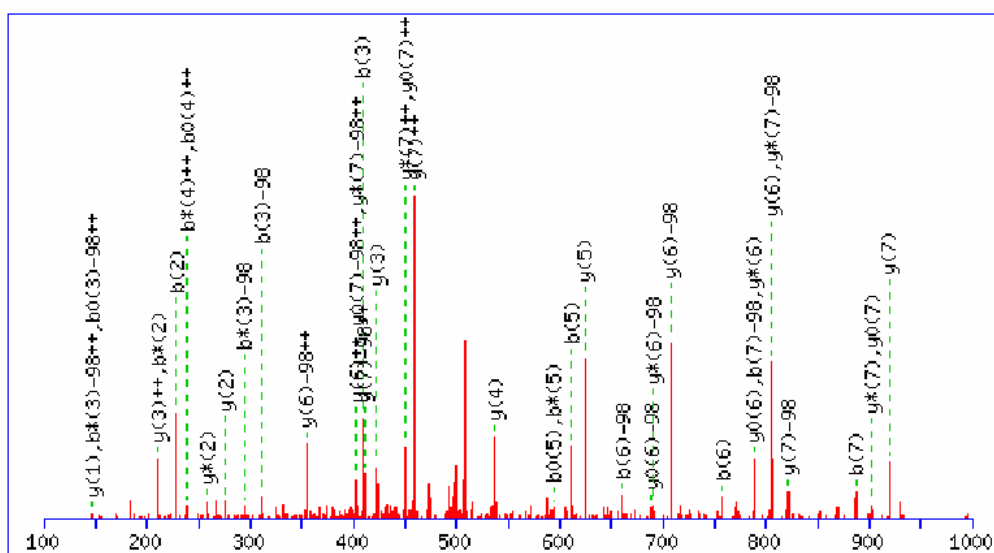

|                        |                              |                        |                                                              |                        |                                                 |          |                                                |           |                                                |
|------------------------|------------------------------|------------------------|--------------------------------------------------------------|------------------------|-------------------------------------------------|----------|------------------------------------------------|-----------|------------------------------------------------|
| 74.0600 <sup>+2</sup>  | y <sub>1</sub> <sup>+2</sup> | 311.1714               | b <sub>3</sub> -H <sub>3</sub> PO <sub>4</sub>               | 422.2398               | y <sub>3</sub>                                  | 611.2072 | b <sub>5</sub>                                 | 821.3788  | y <sub>7</sub> -H <sub>3</sub> PO <sub>4</sub> |
| 138.0893 <sup>+2</sup> | y <sub>2</sub> <sup>+2</sup> | 312.6530 <sup>+2</sup> | y <sub>5</sub> <sup>+2</sup>                                 | 460.1815 <sup>+2</sup> | y <sub>7</sub> <sup>+2</sup>                    | 624.2988 | y <sub>5</sub>                                 | 886.3342  | b <sub>7</sub>                                 |
| 147.1128               | y <sub>1</sub>               | 354.1716 <sup>+2</sup> | y <sub>6</sub> -H <sub>3</sub> PO <sub>4</sub> <sup>+2</sup> | 467.7351 <sup>+2</sup> | MH-H <sub>3</sub> PO <sub>4</sub> <sup>+2</sup> | 660.2988 | b <sub>6</sub> -H <sub>3</sub> PO <sub>4</sub> | 919.3557  | y <sub>7</sub>                                 |
| 211.6235 <sup>+2</sup> | y <sub>3</sub> <sup>+2</sup> | 398.2034               | b <sub>4</sub> -H <sub>3</sub> PO <sub>4</sub>               | 496.1803               | b <sub>4</sub>                                  | 707.3359 | y <sub>6</sub> -H <sub>3</sub> PO <sub>4</sub> | 934.4629  | MH-H <sub>3</sub> PO <sub>4</sub>              |
| 228.1343               | b <sub>2</sub>               | 403.1600 <sup>+2</sup> | y <sub>6</sub> <sup>+2</sup>                                 | 513.2304               | b <sub>5</sub> -H <sub>3</sub> PO <sub>4</sub>  | 758.2757 | b <sub>6</sub>                                 | 1032.4398 | MH                                             |
| 269.1370 <sup>+2</sup> | y <sub>4</sub> <sup>+2</sup> | 409.1483               | b <sub>3</sub>                                               | 516.7235 <sup>+2</sup> | MH <sup>+2</sup>                                | 788.3573 | b <sub>7</sub> -H <sub>3</sub> PO <sub>4</sub> |           |                                                |
| 275.1714               | y <sub>2</sub>               | 411.1930 <sup>+2</sup> | y <sub>7</sub> -H <sub>3</sub> PO <sub>4</sub> <sup>+2</sup> | 537.2667               | y <sub>4</sub>                                  | 805.3128 | y <sub>6</sub>                                 |           |                                                |

MS/MS Fragmentation of sLPVSVPVWGFK  
 Found in IPI00306195, CDNA FLJ30949 fis, clone HCASM1000021,  
 weakly similar to Plasmodium berghei strain NYU2 merozoite surface protein-1 mRNA

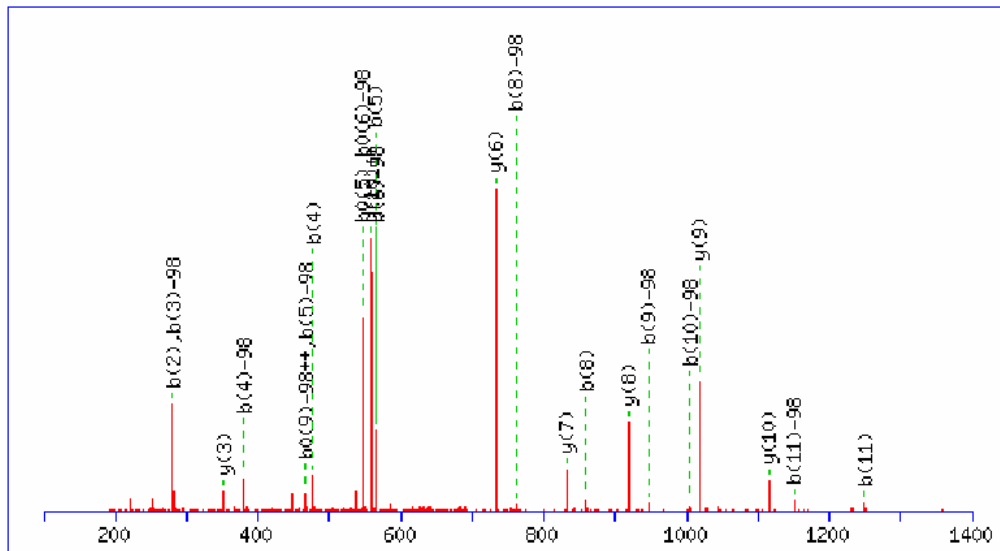

|                        |                                                |                        |                                                |                        |                                                 |           |                                                 |           |                                                 |
|------------------------|------------------------------------------------|------------------------|------------------------------------------------|------------------------|-------------------------------------------------|-----------|-------------------------------------------------|-----------|-------------------------------------------------|
| 74.0600 <sup>+2</sup>  | y <sub>1</sub> <sup>+2</sup>                   | 351.2027               | y <sub>3</sub>                                 | 558.3160 <sup>+2</sup> | y <sub>10</sub> <sup>+2</sup>                   | 760.3641  | b <sub>7</sub>                                  | 1115.6248 | y <sub>10</sub>                                 |
| 147.1128               | y <sub>1</sub>                                 | 367.2052 <sup>+2</sup> | y <sub>6</sub> <sup>+2</sup>                   | 564.2429               | b <sub>5</sub>                                  | 761.4556  | b <sub>8</sub> -H <sub>3</sub> PO <sub>4</sub>  | 1151.6248 | b <sub>11</sub> -H <sub>3</sub> PO <sub>4</sub> |
| 147.5942 <sup>+2</sup> | y <sub>2</sub> <sup>+2</sup>                   | 378.1425               | b <sub>3</sub>                                 | 565.3344               | b <sub>6</sub> -H <sub>3</sub> PO <sub>4</sub>  | 832.4716  | y <sub>7</sub>                                  | 1228.7089 | y <sub>11</sub>                                 |
| 176.1050 <sup>+2</sup> | y <sub>3</sub> <sup>+2</sup>                   | 379.234                | b <sub>4</sub> -H <sub>3</sub> PO <sub>4</sub> | 614.8581 <sup>+2</sup> | y <sub>11</sub> <sup>+2</sup>                   | 859.4325  | b <sub>8</sub>                                  | 1249.6017 | b <sub>11</sub>                                 |
| 183.1128               | b <sub>2</sub> -H <sub>3</sub> PO <sub>4</sub> | 416.7394 <sup>+2</sup> | y <sub>7</sub> <sup>+2</sup>                   | 636.3504               | y <sub>5</sub>                                  | 919.5036  | y <sub>8</sub>                                  | 1297.7303 | MH-H <sub>3</sub> PO <sub>4</sub>               |
| 269.1446 <sup>+2</sup> | y <sub>4</sub> <sup>+2</sup>                   | 460.2554 <sup>+2</sup> | y <sub>8</sub> <sup>+2</sup>                   | 649.3688 <sup>+2</sup> | MH-H <sub>3</sub> PO <sub>4</sub> <sup>+2</sup> | 947.5349  | b <sub>9</sub> -H <sub>3</sub> PO <sub>4</sub>  | 1395.7072 | MH                                              |
| 280.1656               | b <sub>3</sub> -H <sub>3</sub> PO <sub>4</sub> | 466.266                | b <sub>5</sub> -H <sub>3</sub> PO <sub>4</sub> | 662.3872               | b <sub>7</sub> -H <sub>3</sub> PO <sub>4</sub>  | 1004.5564 | b <sub>10</sub> -H <sub>3</sub> PO <sub>4</sub> |           |                                                 |
| 281.0897               | b <sub>2</sub>                                 | 477.2109               | b <sub>4</sub>                                 | 663.3113               | b <sub>6</sub>                                  | 1018.572  | y <sub>9</sub>                                  |           |                                                 |
| 294.1812               | y <sub>2</sub>                                 | 509.7897 <sup>+2</sup> | y <sub>9</sub> <sup>+2</sup>                   | 698.3572 <sup>+2</sup> | MH <sup>+2</sup>                                | 1045.5118 | b <sub>9</sub>                                  |           |                                                 |
| 318.6788 <sup>+2</sup> | y <sub>5</sub> <sup>+2</sup>                   | 537.282                | y <sub>4</sub>                                 | 733.4032               | y <sub>6</sub>                                  | 1102.5333 | b <sub>10</sub>                                 |           |                                                 |

MS/MS Fragmentation of sIQDLTVTGTEPGQVSSR  
 Found in IPI00218566, Isoform 1A of Mitogen-activated protein kinase kinase 7

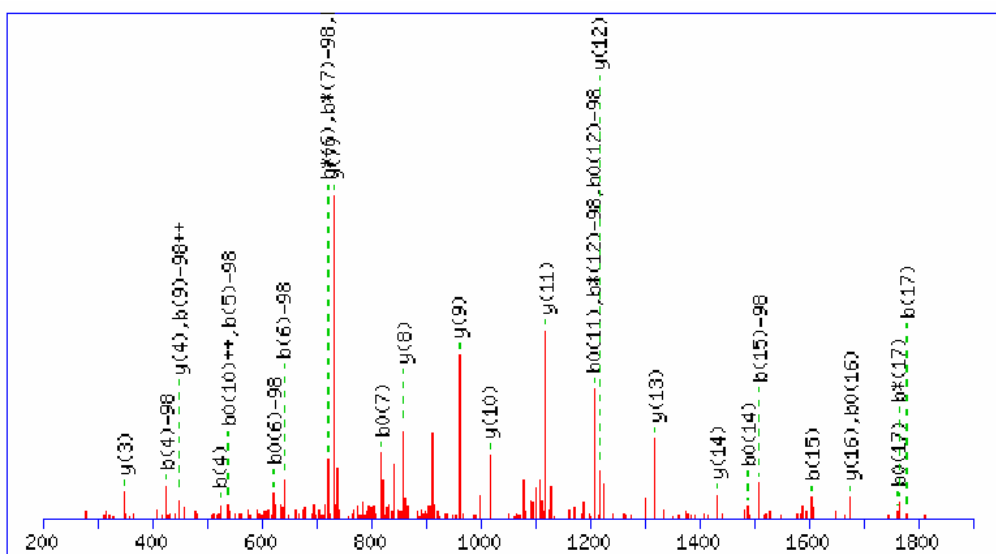

|                        |                                                |                        |                                                |                        |                                                 |                        |                                                 |           |                                                 |
|------------------------|------------------------------------------------|------------------------|------------------------------------------------|------------------------|-------------------------------------------------|------------------------|-------------------------------------------------|-----------|-------------------------------------------------|
| 88.0631 <sup>+2</sup>  | y <sub>1</sub> <sup>+2</sup>                   | 426.1983               | b <sub>4</sub> -H <sub>3</sub> PO <sub>4</sub> | 716.3755 <sup>+2</sup> | y <sub>14</sub> <sup>+2</sup>                   | 977.9595 <sup>+2</sup> | MH <sup>+2</sup>                                | 1409.6907 | b <sub>14</sub> -H <sub>3</sub> PO <sub>4</sub> |
| 131.5791 <sup>+2</sup> | y <sub>2</sub> <sup>+2</sup>                   | 430.2170 <sup>+2</sup> | y <sub>8</sub> <sup>+2</sup>                   | 730.3842               | y <sub>7</sub>                                  | 995.4445               | b <sub>9</sub>                                  | 1431.7438 | y <sub>14</sub>                                 |
| 175.0951 <sup>+2</sup> | y <sub>3</sub> <sup>+2</sup>                   | 448.2514               | y <sub>4</sub>                                 | 738.307                | b <sub>6</sub>                                  | 998.5153               | b <sub>10</sub> -H <sub>3</sub> PO <sub>4</sub> | 1507.6676 | b <sub>14</sub>                                 |
| 175.119                | y <sub>1</sub>                                 | 480.7409 <sup>+2</sup> | y <sub>9</sub> <sup>+2</sup>                   | 739.3985               | b <sub>7</sub> -H <sub>3</sub> PO <sub>4</sub>  | 1017.496               | y <sub>10</sub>                                 | 1508.7591 | b <sub>15</sub> -H <sub>3</sub> PO <sub>4</sub> |
| 183.1128               | b <sub>2</sub> -H <sub>3</sub> PO <sub>4</sub> | 509.2516 <sup>+2</sup> | y <sub>10</sub> <sup>+2</sup>                  | 773.8890 <sup>+2</sup> | y <sub>15</sub> <sup>+2</sup>                   | 1096.4922              | b <sub>10</sub>                                 | 1546.7707 | y <sub>15</sub>                                 |
| 224.6293 <sup>+2</sup> | y <sub>4</sub> <sup>+2</sup>                   | 524.1752               | b <sub>4</sub>                                 | 837.3754               | b <sub>7</sub>                                  | 1118.5436              | y <sub>11</sub>                                 | 1595.7911 | b <sub>16</sub> -H <sub>3</sub> PO <sub>4</sub> |
| 262.151                | y <sub>2</sub>                                 | 539.2824               | b <sub>5</sub> -H <sub>3</sub> PO <sub>4</sub> | 837.9183 <sup>+2</sup> | y <sub>16</sub> <sup>+2</sup>                   | 1127.5579              | b <sub>11</sub> -H <sub>3</sub> PO <sub>4</sub> | 1606.736  | b <sub>15</sub>                                 |
| 281.0897               | b <sub>2</sub>                                 | 559.7755 <sup>+2</sup> | y <sub>11</sub> <sup>+2</sup>                  | 840.4462               | b <sub>8</sub> -H <sub>3</sub> PO <sub>4</sub>  | 1217.6121              | y <sub>12</sub>                                 | 1674.8293 | y <sub>16</sub>                                 |
| 288.6586 <sup>+2</sup> | y <sub>5</sub> <sup>+2</sup>                   | 576.31                 | y <sub>5</sub>                                 | 859.4268               | y <sub>8</sub>                                  | 1224.6107              | b <sub>12</sub> -H <sub>3</sub> PO <sub>4</sub> | 1682.8232 | b <sub>17</sub> -H <sub>3</sub> PO <sub>4</sub> |
| 311.1714               | b <sub>3</sub> -H <sub>3</sub> PO <sub>4</sub> | 609.3097 <sup>+2</sup> | y <sub>12</sub> <sup>+2</sup>                  | 894.4603 <sup>+2</sup> | y <sub>17</sub> <sup>+2</sup>                   | 1225.5348              | b <sub>11</sub>                                 | 1693.768  | b <sub>16</sub>                                 |
| 317.1694 <sup>+2</sup> | y <sub>6</sub> <sup>+2</sup>                   | 633.3315               | y <sub>6</sub>                                 | 897.4676               | b <sub>9</sub> -H <sub>3</sub> PO <sub>4</sub>  | 1281.6321              | b <sub>13</sub> -H <sub>3</sub> PO <sub>4</sub> | 1780.8001 | b <sub>17</sub>                                 |
| 349.183                | y <sub>3</sub>                                 | 637.2593               | b <sub>5</sub>                                 | 928.9711 <sup>+2</sup> | MH-H <sub>3</sub> PO <sub>4</sub> <sup>+2</sup> | 1318.6597              | y <sub>13</sub>                                 | 1787.9134 | y <sub>17</sub>                                 |
| 365.6958 <sup>+2</sup> | y <sub>7</sub> <sup>+2</sup>                   | 640.3301               | b <sub>6</sub> -H <sub>3</sub> PO <sub>4</sub> | 938.4231               | b <sub>8</sub>                                  | 1322.5876              | b <sub>12</sub>                                 | 1856.9348 | MH-H <sub>3</sub> PO <sub>4</sub>               |
| 409.1483               | b <sub>3</sub>                                 | 659.8335 <sup>+2</sup> | y <sub>13</sub> <sup>+2</sup>                  | 960.4745               | y <sub>9</sub>                                  | 1379.609               | b <sub>13</sub>                                 | 1954.9117 | MH                                              |

MS/MS Fragmentation of RR*s*IQDLTVTGTEPGQVSSR  
 Found in IPI00218566, Isoform 1A of Mitogen-activated protein kinase kinase kinase 7

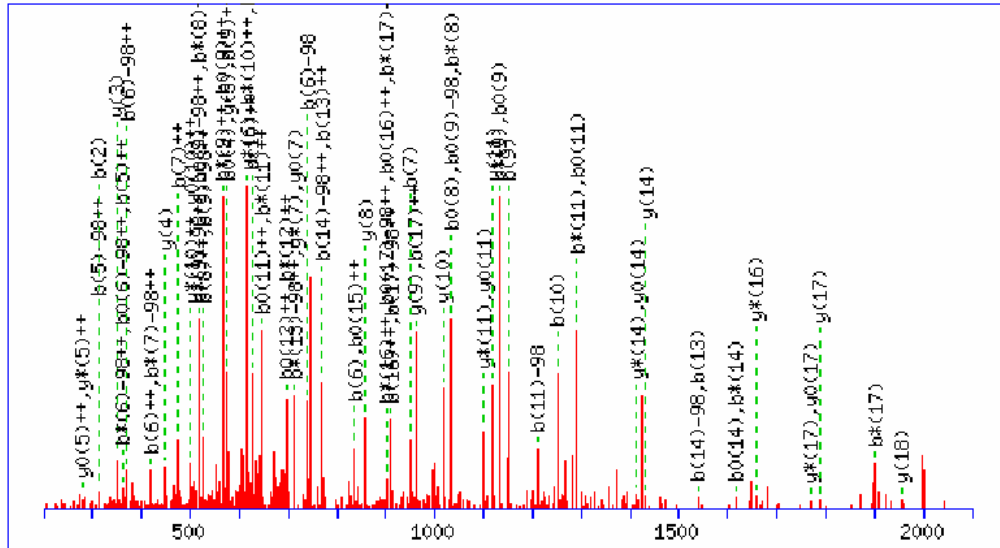

|                        |                                                              |                        |                                                               |                        |                                                               |                         |                                                               |           |                                                 |
|------------------------|--------------------------------------------------------------|------------------------|---------------------------------------------------------------|------------------------|---------------------------------------------------------------|-------------------------|---------------------------------------------------------------|-----------|-------------------------------------------------|
| 88.0631 <sup>+2</sup>  | y <sub>1</sub> <sup>+2</sup>                                 | 475.2344 <sup>+2</sup> | b <sub>7</sub> <sup>+2</sup>                                  | 721.3505               | b <sub>5</sub>                                                | 998.0163 <sup>+2</sup>  | b <sub>19</sub> -H <sub>3</sub> PO <sub>4</sub> <sup>+2</sup> | 1546.7707 | y <sub>15</sub>                                 |
| 131.5791 <sup>+2</sup> | y <sub>2</sub> <sup>+2</sup>                                 | 476.7698 <sup>+2</sup> | b <sub>8</sub> -H <sub>3</sub> PO <sub>4</sub> <sup>+2</sup>  | 730.3842               | y <sub>7</sub>                                                | 1003.4888 <sup>+2</sup> | b <sub>18</sub> <sup>+2</sup>                                 | 1593.8343 | b <sub>15</sub> -H <sub>3</sub> PO <sub>4</sub> |
| 157.1084 <sup>+2</sup> | b <sub>2</sub> <sup>+2</sup>                                 | 480.2079               | b <sub>3</sub>                                                | 738.4005               | b <sub>6</sub> -H <sub>3</sub> PO <sub>4</sub>                | 1007.0216 <sup>+2</sup> | y <sub>19</sub> -H <sub>3</sub> PO <sub>4</sub> <sup>+2</sup> | 1634.7898 | b <sub>14</sub>                                 |
| 175.0951 <sup>+2</sup> | y <sub>3</sub> <sup>+2</sup>                                 | 480.7409 <sup>+2</sup> | y <sub>9</sub> <sup>+2</sup>                                  | 768.9101 <sup>+2</sup> | b <sub>14</sub> -H <sub>3</sub> PO <sub>4</sub> <sup>+2</sup> | 1017.496                | y <sub>10</sub>                                               | 1674.8293 | y <sub>16</sub>                                 |
| 175.119                | y <sub>1</sub>                                               | 495.315                | b <sub>4</sub> -H <sub>3</sub> PO <sub>4</sub>                | 769.3721 <sup>+2</sup> | b <sub>13</sub> <sup>+2</sup>                                 | 1047.0048 <sup>+2</sup> | b <sub>19</sub> <sup>+2</sup>                                 | 1691.8112 | b <sub>15</sub>                                 |
| 191.6191 <sup>+2</sup> | b <sub>3</sub> -H <sub>3</sub> PO <sub>4</sub> <sup>+2</sup> | 509.2516 <sup>+2</sup> | y <sub>10</sub> <sup>+2</sup>                                 | 773.8890 <sup>+2</sup> | y <sub>15</sub> <sup>+2</sup>                                 | 1050.5092               | b <sub>8</sub>                                                | 1721.8929 | b <sub>16</sub> -H <sub>3</sub> PO <sub>4</sub> |
| 224.6293 <sup>+2</sup> | y <sub>4</sub> <sup>+2</sup>                                 | 525.7582 <sup>+2</sup> | b <sub>8</sub> <sup>+2</sup>                                  | 797.4208 <sup>+2</sup> | b <sub>15</sub> -H <sub>3</sub> PO <sub>4</sub> <sup>+2</sup> | 1051.6007               | b <sub>9</sub> -H <sub>3</sub> PO <sub>4</sub>                | 1787.9134 | y <sub>17</sub>                                 |
| 240.6076 <sup>+2</sup> | b <sub>3</sub> <sup>+2</sup>                                 | 526.3040 <sup>+2</sup> | b <sub>9</sub> -H <sub>3</sub> PO <sub>4</sub> <sup>+2</sup>  | 817.8985 <sup>+2</sup> | b <sub>14</sub> <sup>+2</sup>                                 | 1056.0101 <sup>+2</sup> | y <sub>19</sub> <sup>+2</sup>                                 | 1819.8698 | b <sub>16</sub>                                 |
| 248.1612 <sup>+2</sup> | b <sub>4</sub> -H <sub>3</sub> PO <sub>4</sub> <sup>+2</sup> | 559.7755 <sup>+2</sup> | y <sub>11</sub> <sup>+2</sup>                                 | 836.3774               | b <sub>6</sub>                                                | 1085.0722 <sup>+2</sup> | MH-H <sub>3</sub> PO <sub>4</sub> <sup>+2</sup>               | 1820.9613 | b <sub>17</sub> -H <sub>3</sub> PO <sub>4</sub> |
| 262.151                | y <sub>2</sub>                                               | 575.2924 <sup>+2</sup> | b <sub>9</sub> <sup>+2</sup>                                  | 837.9183 <sup>+2</sup> | y <sub>16</sub> <sup>+2</sup>                                 | 1118.5436               | y <sub>11</sub>                                               | 1856.9348 | y <sub>18</sub> -H <sub>3</sub> PO <sub>4</sub> |
| 288.6586 <sup>+2</sup> | y <sub>5</sub> <sup>+2</sup>                                 | 576.31                 | y <sub>5</sub>                                                | 846.4093 <sup>+2</sup> | b <sub>15</sub> <sup>+2</sup>                                 | 1134.0606 <sup>+2</sup> | MH <sup>+2</sup>                                              | 1907.9934 | b <sub>18</sub> -H <sub>3</sub> PO <sub>4</sub> |
| 297.1496 <sup>+2</sup> | b <sub>4</sub> <sup>+2</sup>                                 | 576.8278 <sup>+2</sup> | b <sub>10</sub> -H <sub>3</sub> PO <sub>4</sub> <sup>+2</sup> | 851.4846               | b <sub>7</sub> -H <sub>3</sub> PO <sub>4</sub>                | 1149.5776               | b <sub>9</sub>                                                | 1918.9382 | b <sub>17</sub>                                 |
| 312.1904 <sup>+2</sup> | b <sub>5</sub> -H <sub>3</sub> PO <sub>4</sub> <sup>+2</sup> | 593.2919               | b <sub>4</sub>                                                | 859.4268               | y <sub>8</sub>                                                | 1152.6484               | b <sub>10</sub> -H <sub>3</sub> PO <sub>4</sub>               | 1954.9117 | y <sub>18</sub>                                 |
| 313.2095               | b <sub>2</sub>                                               | 605.3386 <sup>+2</sup> | b <sub>11</sub> -H <sub>3</sub> PO <sub>4</sub> <sup>+2</sup> | 861.4501 <sup>+2</sup> | b <sub>16</sub> -H <sub>3</sub> PO <sub>4</sub> <sup>+2</sup> | 1209.6698               | b <sub>11</sub> -H <sub>3</sub> PO <sub>4</sub>               | 1995.0254 | b <sub>19</sub> -H <sub>3</sub> PO <sub>4</sub> |
| 317.1694 <sup>+2</sup> | y <sub>6</sub> <sup>+2</sup>                                 | 609.3097 <sup>+2</sup> | y <sub>12</sub> <sup>+2</sup>                                 | 894.4603 <sup>+2</sup> | y <sub>17</sub> <sup>+2</sup>                                 | 1217.6121               | y <sub>12</sub>                                               | 2005.9703 | b <sub>18</sub>                                 |
| 349.183                | y <sub>3</sub>                                               | 623.3736               | b <sub>5</sub> -H <sub>3</sub> PO <sub>4</sub>                | 910.4385 <sup>+2</sup> | b <sub>16</sub> <sup>+2</sup>                                 | 1250.6253               | b <sub>10</sub>                                               | 2013.036  | y <sub>19</sub> -H <sub>3</sub> PO <sub>4</sub> |
| 361.1789 <sup>+2</sup> | b <sub>5</sub> <sup>+2</sup>                                 | 625.8163 <sup>+2</sup> | b <sub>10</sub> <sup>+2</sup>                                 | 910.9843 <sup>+2</sup> | b <sub>17</sub> -H <sub>3</sub> PO <sub>4</sub> <sup>+2</sup> | 1307.6467               | b <sub>11</sub>                                               | 2093.0023 | b <sub>19</sub>                                 |
| 365.6958 <sup>+2</sup> | y <sub>7</sub> <sup>+2</sup>                                 | 633.3315               | y <sub>6</sub>                                                | 928.9711 <sup>+2</sup> | y <sub>18</sub> -H <sub>3</sub> PO <sub>4</sub> <sup>+2</sup> | 1310.7175               | b <sub>12</sub> -H <sub>3</sub> PO <sub>4</sub>               | 2111.0129 | y <sub>19</sub>                                 |
| 369.7039 <sup>+2</sup> | b <sub>6</sub> -H <sub>3</sub> PO <sub>4</sub> <sup>+2</sup> | 654.3270 <sup>+2</sup> | b <sub>11</sub> <sup>+2</sup>                                 | 949.4615               | b <sub>7</sub>                                                | 1318.6597               | y <sub>13</sub>                                               | 2169.1371 | MH-H <sub>3</sub> PO <sub>4</sub>               |
| 382.231                | b <sub>3</sub> -H <sub>3</sub> PO <sub>4</sub>               | 655.8624 <sup>+2</sup> | b <sub>12</sub> -H <sub>3</sub> PO <sub>4</sub> <sup>+2</sup> | 952.5323               | b <sub>8</sub> -H <sub>3</sub> PO <sub>4</sub>                | 1408.6944               | b <sub>12</sub>                                               | 2267.114  | MH                                              |
| 418.6924 <sup>+2</sup> | b <sub>6</sub> <sup>+2</sup>                                 | 659.8335 <sup>+2</sup> | y <sub>13</sub> <sup>+2</sup>                                 | 954.5003 <sup>+2</sup> | b <sub>18</sub> -H <sub>3</sub> PO <sub>4</sub> <sup>+2</sup> | 1431.7438               | y <sub>14</sub>                                               |           |                                                 |
| 426.2459 <sup>+2</sup> | b <sub>7</sub> -H <sub>3</sub> PO <sub>4</sub> <sup>+2</sup> | 704.8508 <sup>+2</sup> | b <sub>12</sub> <sup>+2</sup>                                 | 959.9728 <sup>+2</sup> | b <sub>17</sub> <sup>+2</sup>                                 | 1439.7601               | b <sub>13</sub> -H <sub>3</sub> PO <sub>4</sub>               |           |                                                 |
| 430.2170 <sup>+2</sup> | y <sub>8</sub> <sup>+2</sup>                                 | 716.3755 <sup>+2</sup> | y <sub>14</sub> <sup>+2</sup>                                 | 960.4745               | y <sub>9</sub>                                                | 1536.8129               | b <sub>14</sub> -H <sub>3</sub> PO <sub>4</sub>               |           |                                                 |
| 448.2514               | y <sub>4</sub>                                               | 720.3837 <sup>+2</sup> | b <sub>13</sub> -H <sub>3</sub> PO <sub>4</sub> <sup>+2</sup> | 977.9595 <sup>+2</sup> | y <sub>18</sub> <sup>+2</sup>                                 | 1537.737                | b <sub>13</sub>                                               |           |                                                 |

MS/MS Fragmentation of HR(ST)PHLDGAGGGAAGEDGDLGLGSAR  
 Found in IPI00022107, PREDICTED: similar to leucine rich repeat  
 and fibronectin type III domain containing 1

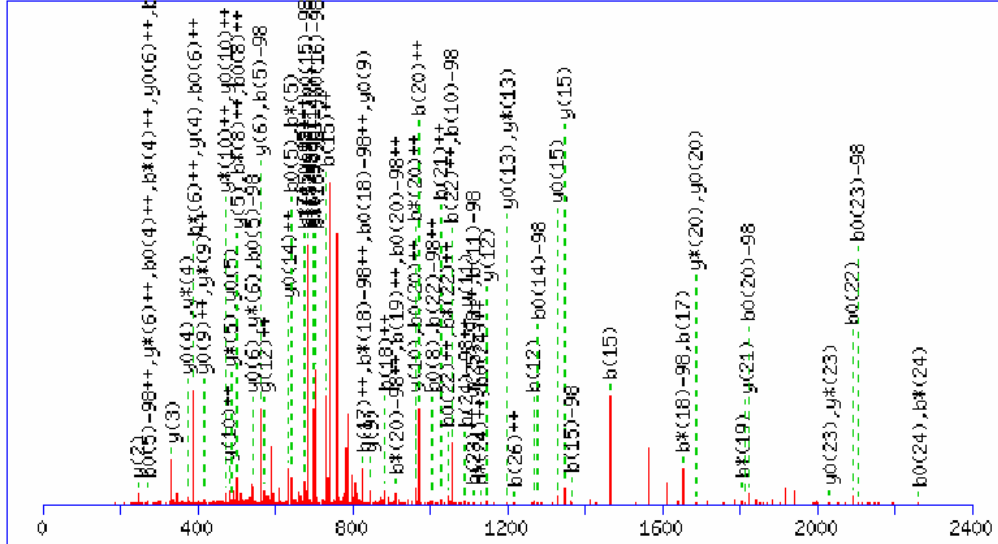

|                        |                                                               |                        |                                                               |                         |                                                               |                         |                                                               |           |                                                 |
|------------------------|---------------------------------------------------------------|------------------------|---------------------------------------------------------------|-------------------------|---------------------------------------------------------------|-------------------------|---------------------------------------------------------------|-----------|-------------------------------------------------|
| 88.0631 <sup>+2</sup>  | y <sub>1</sub> <sup>+2</sup>                                  | 541.2324 <sup>+2</sup> | b <sub>9</sub> <sup>+2</sup>                                  | 811.4322                | b <sub>7</sub> -H <sub>3</sub> PO <sub>4</sub>                | 1134.5230 <sup>+2</sup> | b <sub>25</sub> -H <sub>3</sub> PO <sub>4</sub> <sup>+2</sup> | 1668.7473 | b <sub>18</sub> -H <sub>3</sub> PO <sub>4</sub> |
| 123.5817 <sup>+2</sup> | y <sub>2</sub> <sup>+2</sup>                                  | 545.2622 <sup>+2</sup> | y <sub>11</sub> <sup>+2</sup>                                 | 826.3523 <sup>+2</sup>  | b <sub>17</sub> <sup>+2</sup>                                 | 1139.9955 <sup>+2</sup> | b <sub>24</sub> <sup>+2</sup>                                 | 1702.7627 | y <sub>20</sub>                                 |
| 147.5873 <sup>+2</sup> | b <sub>2</sub> <sup>+2</sup>                                  | 556.2732 <sup>+2</sup> | b <sub>11</sub> -H <sub>3</sub> PO <sub>4</sub> <sup>+2</sup> | 834.8773 <sup>+2</sup>  | b <sub>18</sub> -H <sub>3</sub> PO <sub>4</sub> <sup>+2</sup> | 1146.5386               | y <sub>12</sub>                                               | 1725.7688 | b <sub>19</sub> -H <sub>3</sub> PO <sub>4</sub> |
| 167.0977 <sup>+2</sup> | y <sub>3</sub> <sup>+2</sup>                                  | 560.3151               | y <sub>6</sub>                                                | 845.4476                | y <sub>9</sub>                                                | 1152.4946               | b <sub>10</sub>                                               | 1766.7242 | b <sub>18</sub>                                 |
| 175.119                | y <sub>1</sub>                                                | 561.2892               | b <sub>5</sub> -H <sub>3</sub> PO <sub>4</sub>                | 851.8850 <sup>+2</sup>  | y <sub>20</sub> <sup>+2</sup>                                 | 1159.5059 <sup>+2</sup> | y <sub>25</sub> <sup>+2</sup>                                 | 1815.8468 | y <sub>21</sub>                                 |
| 191.1033 <sup>+2</sup> | b <sub>3</sub> <sup>+2</sup>                                  | 562.2133               | b <sub>4</sub>                                                | 863.3880 <sup>+2</sup>  | b <sub>19</sub> -H <sub>3</sub> PO <sub>4</sub> <sup>+2</sup> | 1168.5606               | b <sub>12</sub> -H <sub>3</sub> PO <sub>4</sub>               | 1823.7457 | b <sub>19</sub>                                 |
| 195.6084 <sup>+2</sup> | y <sub>4</sub> <sup>+2</sup>                                  | 573.7729 <sup>+2</sup> | y <sub>12</sub> <sup>+2</sup>                                 | 883.8657 <sup>+2</sup>  | b <sub>18</sub> <sup>+2</sup>                                 | 1170.0416 <sup>+2</sup> | b <sub>26</sub> -H <sub>3</sub> PO <sub>4</sub> <sup>+2</sup> | 1840.7957 | b <sub>20</sub> -H <sub>3</sub> PO <sub>4</sub> |
| 232.6219 <sup>+2</sup> | b <sub>4</sub> -H <sub>3</sub> PO <sub>4</sub> <sup>+2</sup>  | 576.7509 <sup>+2</sup> | b <sub>10</sub> <sup>+2</sup>                                 | 908.4270 <sup>+2</sup>  | y <sub>21</sub> <sup>+2</sup>                                 | 1183.5115 <sup>+2</sup> | b <sub>25</sub> <sup>+2</sup>                                 | 1938.7726 | b <sub>20</sub>                                 |
| 246.1561               | y <sub>2</sub>                                                | 584.7840 <sup>+2</sup> | b <sub>12</sub> -H <sub>3</sub> PO <sub>4</sub> <sup>+2</sup> | 909.4091                | b <sub>7</sub>                                                | 1188.5680 <sup>+2</sup> | y <sub>26</sub> -H <sub>3</sub> PO <sub>4</sub> <sup>+2</sup> | 1952.9057 | y <sub>22</sub>                                 |
| 252.1504 <sup>+2</sup> | y <sub>5</sub> <sup>+2</sup>                                  | 605.2617 <sup>+2</sup> | b <sub>11</sub> <sup>+2</sup>                                 | 912.3765 <sup>+2</sup>  | b <sub>19</sub> <sup>+2</sup>                                 | 1209.5161               | b <sub>11</sub>                                               | 1953.8798 | b <sub>21</sub> -H <sub>3</sub> PO <sub>4</sub> |
| 280.6612 <sup>+2</sup> | y <sub>6</sub> <sup>+2</sup>                                  | 609.2915 <sup>+2</sup> | y <sub>13</sub> <sup>+2</sup>                                 | 920.9015 <sup>+2</sup>  | b <sub>20</sub> -H <sub>3</sub> PO <sub>4</sub> <sup>+2</sup> | 1217.5757               | y <sub>13</sub>                                               | 2010.9013 | b <sub>22</sub> -H <sub>3</sub> PO <sub>4</sub> |
| 281.1482 <sup>+2</sup> | b <sub>5</sub> -H <sub>3</sub> PO <sub>4</sub> <sup>+2</sup>  | 613.2947 <sup>+2</sup> | b <sub>13</sub> -H <sub>3</sub> PO <sub>4</sub> <sup>+2</sup> | 926.4591                | b <sub>8</sub> -H <sub>3</sub> PO <sub>4</sub>                | 1219.0300 <sup>+2</sup> | b <sub>26</sub> <sup>+2</sup>                                 | 2049.9584 | y <sub>23</sub>                                 |
| 281.6103 <sup>+2</sup> | b <sub>4</sub> <sup>+2</sup>                                  | 633.7724 <sup>+2</sup> | b <sub>12</sub> <sup>+2</sup>                                 | 960.4745                | y <sub>10</sub>                                               | 1225.5821               | b <sub>13</sub> -H <sub>3</sub> PO <sub>4</sub>               | 2051.8567 | b <sub>21</sub>                                 |
| 294.1673               | b <sub>2</sub>                                                | 644.8100 <sup>+2</sup> | y <sub>14</sub> <sup>+2</sup>                                 | 969.8899 <sup>+2</sup>  | b <sub>20</sub> <sup>+2</sup>                                 | 1237.5564 <sup>+2</sup> | y <sub>26</sub> <sup>+2</sup>                                 | 2108.8781 | b <sub>22</sub>                                 |
| 330.1367 <sup>+2</sup> | b <sub>5</sub> <sup>+2</sup>                                  | 648.8132 <sup>+2</sup> | b <sub>14</sub> -H <sub>3</sub> PO <sub>4</sub> <sup>+2</sup> | 976.9565 <sup>+2</sup>  | y <sub>22</sub> <sup>+2</sup>                                 | 1257.0974 <sup>+2</sup> | MH-H <sub>3</sub> PO <sub>4</sub> <sup>+2</sup>               | 2123.9853 | b <sub>23</sub> -H <sub>3</sub> PO <sub>4</sub> |
| 333.1881               | y <sub>3</sub>                                                | 659.2661               | b <sub>5</sub>                                                | 977.4435 <sup>+2</sup>  | b <sub>21</sub> -H <sub>3</sub> PO <sub>4</sub> <sup>+2</sup> | 1266.5375               | b <sub>12</sub>                                               | 2132.9955 | y <sub>24</sub> -H <sub>3</sub> PO <sub>4</sub> |
| 337.2032 <sup>+2</sup> | y <sub>7</sub> <sup>+2</sup>                                  | 662.2831 <sup>+2</sup> | b <sub>13</sub> <sup>+2</sup>                                 | 983.4806                | b <sub>9</sub> -H <sub>3</sub> PO <sub>4</sub>                | 1288.6128               | y <sub>14</sub>                                               | 2181.0068 | b <sub>24</sub> -H <sub>3</sub> PO <sub>4</sub> |
| 349.6777 <sup>+2</sup> | b <sub>6</sub> -H <sub>3</sub> PO <sub>4</sub> <sup>+2</sup>  | 673.3208 <sup>+2</sup> | y <sub>15</sub> <sup>+2</sup>                                 | 1005.9543 <sup>+2</sup> | b <sub>22</sub> -H <sub>3</sub> PO <sub>4</sub> <sup>+2</sup> | 1296.6192               | b <sub>14</sub> -H <sub>3</sub> PO <sub>4</sub>               | 2220.0276 | y <sub>25</sub> -H <sub>3</sub> PO <sub>4</sub> |
| 381.1993               | b <sub>3</sub>                                                | 673.3991               | y <sub>7</sub>                                                | 1024.436                | b <sub>8</sub>                                                | 1306.0859 <sup>+2</sup> | MH <sup>+2</sup>                                              | 2221.9622 | b <sub>23</sub>                                 |
| 390.2096               | y <sub>4</sub>                                                | 684.3318 <sup>+2</sup> | b <sub>15</sub> -H <sub>3</sub> PO <sub>4</sub> <sup>+2</sup> | 1025.4829 <sup>+2</sup> | y <sub>23</sub> <sup>+2</sup>                                 | 1323.559                | b <sub>13</sub>                                               | 2230.9724 | y <sub>24</sub>                                 |
| 394.7167 <sup>+2</sup> | y <sub>8</sub> <sup>+2</sup>                                  | 697.8017 <sup>+2</sup> | b <sub>14</sub> <sup>+2</sup>                                 | 1026.4320 <sup>+2</sup> | b <sub>21</sub> <sup>+2</sup>                                 | 1345.6342               | y <sub>15</sub>                                               | 2268.0388 | b <sub>25</sub> -H <sub>3</sub> PO <sub>4</sub> |
| 398.6661 <sup>+2</sup> | b <sub>6</sub> <sup>+2</sup>                                  | 698.3481               | b <sub>6</sub> -H <sub>3</sub> PO <sub>4</sub>                | 1054.5177               | b <sub>10</sub> -H <sub>3</sub> PO <sub>4</sub>               | 1367.6563               | b <sub>15</sub> -H <sub>3</sub> PO <sub>4</sub>               | 2278.9837 | b <sub>24</sub>                                 |
| 406.2197 <sup>+2</sup> | b <sub>7</sub> -H <sub>3</sub> PO <sub>4</sub> <sup>+2</sup>  | 701.8315 <sup>+2</sup> | y <sub>16</sub> <sup>+2</sup>                                 | 1054.9427 <sup>+2</sup> | b <sub>22</sub> <sup>+2</sup>                                 | 1394.5961               | b <sub>14</sub>                                               | 2318.0045 | y <sub>25</sub>                                 |
| 423.2274 <sup>+2</sup> | y <sub>9</sub> <sup>+2</sup>                                  | 712.8425 <sup>+2</sup> | b <sub>16</sub> -H <sub>3</sub> PO <sub>4</sub> <sup>+2</sup> | 1062.4963 <sup>+2</sup> | b <sub>23</sub> -H <sub>3</sub> PO <sub>4</sub> <sup>+2</sup> | 1402.6557               | y <sub>16</sub>                                               | 2339.0759 | b <sub>26</sub> -H <sub>3</sub> PO <sub>4</sub> |
| 455.2082 <sup>+2</sup> | b <sub>7</sub> <sup>+2</sup>                                  | 730.3422 <sup>+2</sup> | y <sub>17</sub> <sup>+2</sup>                                 | 1067.0014 <sup>+2</sup> | y <sub>24</sub> -H <sub>3</sub> PO <sub>4</sub> <sup>+2</sup> | 1424.6778               | b <sub>16</sub> -H <sub>3</sub> PO <sub>4</sub>               | 2366.0157 | b <sub>25</sub>                                 |
| 463.7332 <sup>+2</sup> | b <sub>8</sub> -H <sub>3</sub> PO <sub>4</sub> <sup>+2</sup>  | 733.3202 <sup>+2</sup> | b <sub>15</sub> <sup>+2</sup>                                 | 1081.4575               | b <sub>9</sub>                                                | 1459.6772               | y <sub>17</sub>                                               | 2376.1287 | y <sub>26</sub> -H <sub>3</sub> PO <sub>4</sub> |
| 464.2364               | b <sub>4</sub> -H <sub>3</sub> PO <sub>4</sub>                | 761.8310 <sup>+2</sup> | b <sub>16</sub> <sup>+2</sup>                                 | 1089.5171               | y <sub>11</sub>                                               | 1465.6332               | b <sub>15</sub>                                               | 2437.0528 | b <sub>26</sub>                                 |
| 480.7409 <sup>+2</sup> | y <sub>10</sub> <sup>+2</sup>                                 | 765.8608 <sup>+2</sup> | y <sub>18</sub> <sup>+2</sup>                                 | 1091.0070 <sup>+2</sup> | b <sub>24</sub> -H <sub>3</sub> PO <sub>4</sub> <sup>+2</sup> | 1522.6547               | b <sub>16</sub>                                               | 2474.1056 | y <sub>26</sub>                                 |
| 492.2439 <sup>+2</sup> | b <sub>9</sub> -H <sub>3</sub> PO <sub>4</sub> <sup>+2</sup>  | 777.3638 <sup>+2</sup> | b <sub>17</sub> -H <sub>3</sub> PO <sub>4</sub> <sup>+2</sup> | 1110.5174 <sup>+2</sup> | y <sub>25</sub> -H <sub>3</sub> PO <sub>4</sub> <sup>+2</sup> | 1530.7143               | y <sub>18</sub>                                               | 2513.1876 | MH-H <sub>3</sub> PO <sub>4</sub>               |
| 503.2936               | y <sub>5</sub>                                                | 788.4261               | y <sub>8</sub>                                                | 1111.4847 <sup>+2</sup> | b <sub>23</sub> <sup>+2</sup>                                 | 1553.7204               | b <sub>17</sub> -H <sub>3</sub> PO <sub>4</sub>               | 2611.1645 | MH                                              |
| 512.7216 <sup>+2</sup> | b <sub>8</sub> <sup>+2</sup>                                  | 794.3715 <sup>+2</sup> | y <sub>19</sub> <sup>+2</sup>                                 | 1111.5392               | b <sub>11</sub> -H <sub>3</sub> PO <sub>4</sub>               | 1587.7358               | y <sub>19</sub>                                               |           |                                                 |
| 527.7625 <sup>+2</sup> | b <sub>10</sub> -H <sub>3</sub> PO <sub>4</sub> <sup>+2</sup> | 796.325                | b <sub>6</sub>                                                | 1115.9899 <sup>+2</sup> | y <sub>24</sub> <sup>+2</sup>                                 | 1651.6973               | b <sub>17</sub>                                               |           |                                                 |



MS/MS Fragmentation of (SSS)ETILSSLAGSDIVK  
 Found in IPI00009862, Cerebellar degeneration-related protein 2

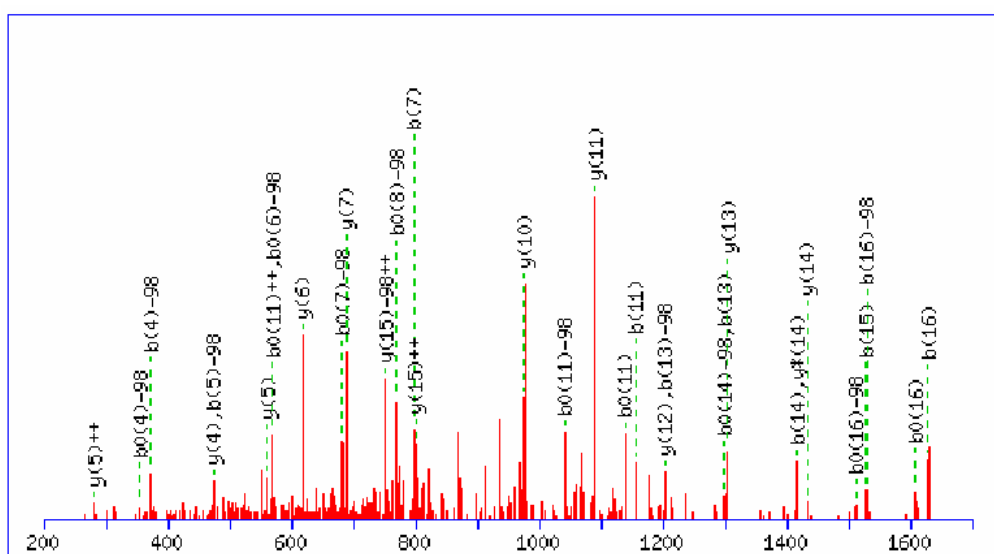

|                        |                                                |                        |                                                |                        |                                                               |           |                                                 |           |                                                 |
|------------------------|------------------------------------------------|------------------------|------------------------------------------------|------------------------|---------------------------------------------------------------|-----------|-------------------------------------------------|-----------|-------------------------------------------------|
| 74.0600 <sup>+2</sup>  | y <sub>1</sub> <sup>+2</sup>                   | 401.7371 <sup>+2</sup> | y <sub>8</sub> <sup>+2</sup>                   | 689.3828               | y <sub>7</sub>                                                | 889.4989  | y <sub>9</sub>                                  | 1317.6169 | b <sub>14</sub> -H <sub>3</sub> PO <sub>4</sub> |
| 123.5942 <sup>+2</sup> | y <sub>2</sub> <sup>+2</sup>                   | 445.2531 <sup>+2</sup> | y <sub>9</sub> <sup>+2</sup>                   | 700.3512               | b <sub>7</sub> -H <sub>3</sub> PO <sub>4</sub>                | 972.3921  | b <sub>9</sub>                                  | 1415.5938 | b <sub>14</sub>                                 |
| 147.1128               | y <sub>1</sub>                                 | 471.1123               | b <sub>4</sub>                                 | 716.8983 <sup>+2</sup> | y <sub>14</sub> <sup>+2</sup>                                 | 976.531   | y <sub>10</sub>                                 | 1430.7009 | b <sub>15</sub> -H <sub>3</sub> PO <sub>4</sub> |
| 175.0713               | b <sub>2</sub>                                 | 474.1831               | b <sub>5</sub> -H <sub>3</sub> PO <sub>4</sub> | 751.4090 <sup>+2</sup> | y <sub>15</sub> -H <sub>3</sub> PO <sub>4</sub> <sup>+2</sup> | 987.4993  | b <sub>10</sub> -H <sub>3</sub> PO <sub>4</sub> | 1432.7894 | y <sub>14</sub>                                 |
| 180.1363 <sup>+2</sup> | y <sub>3</sub> <sup>+2</sup>                   | 474.2922               | y <sub>4</sub>                                 | 787.3832               | b <sub>8</sub> -H <sub>3</sub> PO <sub>4</sub>                | 1058.5364 | b <sub>11</sub> -H <sub>3</sub> PO <sub>4</sub> | 1501.8108 | y <sub>15</sub> -H <sub>3</sub> PO <sub>4</sub> |
| 237.6498 <sup>+2</sup> | y <sub>4</sub> <sup>+2</sup>                   | 488.7691 <sup>+2</sup> | y <sub>10</sub> <sup>+2</sup>                  | 794.9251 <sup>+2</sup> | y <sub>16</sub> -H <sub>3</sub> PO <sub>4</sub> <sup>+2</sup> | 1085.4762 | b <sub>10</sub>                                 | 1528.6778 | b <sub>15</sub>                                 |
| 244.0928               | b <sub>3</sub> -H <sub>3</sub> PO <sub>4</sub> | 545.3111 <sup>+2</sup> | y <sub>11</sub> <sup>+2</sup>                  | 798.3281               | b <sub>7</sub>                                                | 1089.615  | y <sub>11</sub>                                 | 1529.7693 | b <sub>16</sub> -H <sub>3</sub> PO <sub>4</sub> |
| 246.1812               | y <sub>2</sub>                                 | 561.3243               | y <sub>5</sub>                                 | 800.3975 <sup>+2</sup> | y <sub>15</sub> <sup>+2</sup>                                 | 1115.5579 | b <sub>12</sub> -H <sub>3</sub> PO <sub>4</sub> | 1588.8428 | y <sub>16</sub> -H <sub>3</sub> PO <sub>4</sub> |
| 281.1658 <sup>+2</sup> | y <sub>5</sub> <sup>+2</sup>                   | 572.16                 | b <sub>5</sub>                                 | 802.4669               | y <sub>8</sub>                                                | 1156.5133 | b <sub>11</sub>                                 | 1599.7877 | y <sub>15</sub>                                 |
| 309.6765 <sup>+2</sup> | y <sub>6</sub> <sup>+2</sup>                   | 587.2671               | b <sub>6</sub> -H <sub>3</sub> PO <sub>4</sub> | 838.4411 <sup>+2</sup> | MH-H <sub>3</sub> PO <sub>4</sub> <sup>+2</sup>               | 1202.5899 | b <sub>13</sub> -H <sub>3</sub> PO <sub>4</sub> | 1627.7462 | b <sub>16</sub>                                 |
| 342.0697               | b <sub>3</sub>                                 | 601.8532 <sup>+2</sup> | y <sub>12</sub> <sup>+2</sup>                  | 843.9135 <sup>+2</sup> | y <sub>16</sub> <sup>+2</sup>                                 | 1202.6991 | y <sub>12</sub>                                 | 1675.8749 | MH-H <sub>3</sub> PO <sub>4</sub>               |
| 345.1951 <sup>+2</sup> | y <sub>7</sub> <sup>+2</sup>                   | 618.3457               | y <sub>6</sub>                                 | 874.4153               | b <sub>9</sub> -H <sub>3</sub> PO <sub>4</sub>                | 1213.5348 | b <sub>12</sub>                                 | 1686.8197 | y <sub>16</sub>                                 |
| 359.2653               | y <sub>3</sub>                                 | 652.3770 <sup>+2</sup> | y <sub>13</sub> <sup>+2</sup>                  | 885.3601               | b <sub>8</sub>                                                | 1300.5668 | b <sub>13</sub>                                 | 1773.8518 | MH                                              |
| 373.1354               | b <sub>4</sub> -H <sub>3</sub> PO <sub>4</sub> | 685.244                | b <sub>6</sub>                                 | 887.4295 <sup>+2</sup> | MH <sup>+2</sup>                                              | 1303.7468 | y <sub>13</sub>                                 |           |                                                 |

MS/MS Fragmentation of RSPSV(SS)PEPAEK  
 Found in IPI00782992, Isoform 1 of Serine/arginine repetitive matrix protein 2

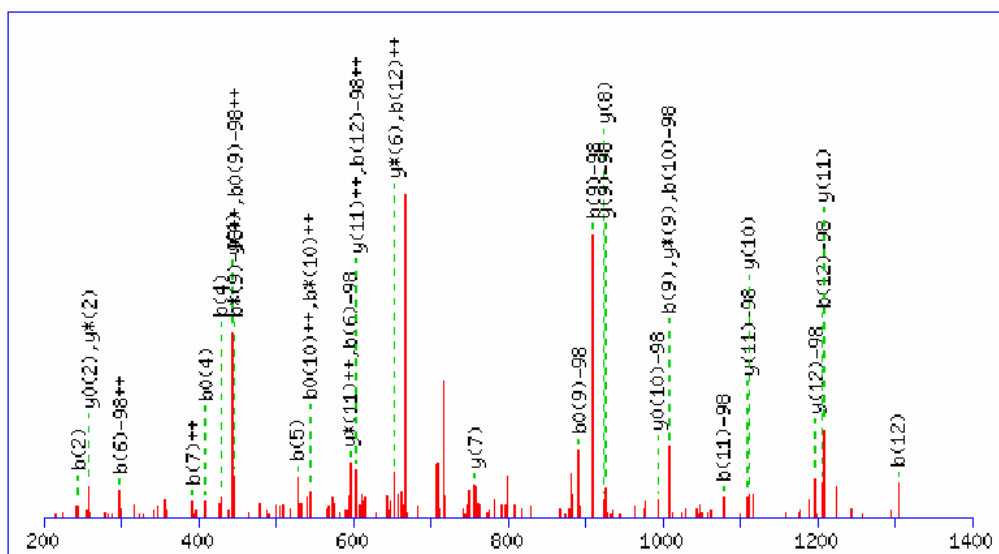

|                        |                                                              |                        |                                                               |                        |                                                               |                        |                                                 |           |                                                 |
|------------------------|--------------------------------------------------------------|------------------------|---------------------------------------------------------------|------------------------|---------------------------------------------------------------|------------------------|-------------------------------------------------|-----------|-------------------------------------------------|
| 74.0600 <sup>+2</sup>  | y <sub>1</sub> <sup>+2</sup>                                 | 342.1772 <sup>+2</sup> | b <sub>7</sub> -H <sub>3</sub> PO <sub>4</sub> <sup>+2</sup>  | 506.7509 <sup>+2</sup> | y <sub>10</sub> -H <sub>3</sub> PO <sub>4</sub> <sup>+2</sup> | 670.3406               | y <sub>6</sub>                                  | 1012.4946 | y <sub>10</sub> -H <sub>3</sub> PO <sub>4</sub> |
| 122.5738 <sup>+2</sup> | b <sub>2</sub> <sup>+2</sup>                                 | 347.1925               | y <sub>3</sub>                                                | 512.2234 <sup>+2</sup> | y <sub>9</sub> <sup>+2</sup>                                  | 676.8439 <sup>+2</sup> | MH-H <sub>3</sub> PO <sub>4</sub> <sup>+2</sup> | 1023.4394 | y <sub>9</sub>                                  |
| 138.5813 <sup>+2</sup> | y <sub>2</sub> <sup>+2</sup>                                 | 347.6496 <sup>+2</sup> | b <sub>6</sub> <sup>+2</sup>                                  | 527.2936               | b <sub>5</sub>                                                | 683.3471               | b <sub>7</sub> -H <sub>3</sub> PO <sub>4</sub>  | 1077.5323 | b <sub>11</sub> -H <sub>3</sub> PO <sub>4</sub> |
| 147.1128               | y <sub>1</sub>                                               | 379.1900 <sup>+2</sup> | y <sub>7</sub> <sup>+2</sup>                                  | 539.2698 <sup>+2</sup> | b <sub>11</sub> -H <sub>3</sub> PO <sub>4</sub> <sup>+2</sup> | 694.292                | b <sub>6</sub>                                  | 1104.4721 | b <sub>10</sub>                                 |
| 171.1002 <sup>+2</sup> | b <sub>3</sub> <sup>+2</sup>                                 | 390.7036 <sup>+2</sup> | b <sub>8</sub> -H <sub>3</sub> PO <sub>4</sub> <sup>+2</sup>  | 552.7397 <sup>+2</sup> | b <sub>10</sub> <sup>+2</sup>                                 | 725.8323 <sup>+2</sup> | MH <sup>+2</sup>                                | 1109.5473 | y <sub>11</sub> -H <sub>3</sub> PO <sub>4</sub> |
| 174.0999 <sup>+2</sup> | y <sub>3</sub> <sup>+2</sup>                                 | 391.1656 <sup>+2</sup> | b <sub>7</sub> <sup>+2</sup>                                  | 555.2773 <sup>+2</sup> | y <sub>11</sub> -H <sub>3</sub> PO <sub>4</sub> <sup>+2</sup> | 757.3727               | y <sub>7</sub>                                  | 1110.4715 | y <sub>10</sub>                                 |
| 214.6162 <sup>+2</sup> | b <sub>4</sub> <sup>+2</sup>                                 | 413.7007 <sup>+2</sup> | y <sub>8</sub> -H <sub>3</sub> PO <sub>4</sub> <sup>+2</sup>  | 555.7394 <sup>+2</sup> | y <sub>10</sub> <sup>+2</sup>                                 | 780.3999               | b <sub>8</sub> -H <sub>3</sub> PO <sub>4</sub>  | 1175.5092 | b <sub>11</sub>                                 |
| 222.6263 <sup>+2</sup> | y <sub>4</sub> <sup>+2</sup>                                 | 428.2252               | b <sub>4</sub>                                                | 573.2879               | y <sub>5</sub>                                                | 781.324                | b <sub>7</sub>                                  | 1196.5794 | y <sub>12</sub> -H <sub>3</sub> PO <sub>4</sub> |
| 244.1404               | b <sub>2</sub>                                               | 439.6920 <sup>+2</sup> | b <sub>8</sub> <sup>+2</sup>                                  | 588.2583 <sup>+2</sup> | b <sub>11</sub> <sup>+2</sup>                                 | 826.3941               | y <sub>8</sub> -H <sub>3</sub> PO <sub>4</sub>  | 1206.5749 | b <sub>12</sub> -H <sub>3</sub> PO <sub>4</sub> |
| 264.1504 <sup>+2</sup> | b <sub>5</sub> <sup>+2</sup>                                 | 444.2453               | y <sub>4</sub>                                                | 596.3151               | b <sub>6</sub> -H <sub>3</sub> PO <sub>4</sub>                | 878.3768               | b <sub>8</sub>                                  | 1207.5242 | y <sub>11</sub>                                 |
| 276.1554               | y <sub>2</sub>                                               | 455.2249 <sup>+2</sup> | b <sub>9</sub> -H <sub>3</sub> PO <sub>4</sub> <sup>+2</sup>  | 598.7933 <sup>+2</sup> | y <sub>12</sub> -H <sub>3</sub> PO <sub>4</sub> <sup>+2</sup> | 909.4425               | b <sub>9</sub> -H <sub>3</sub> PO <sub>4</sub>  | 1294.5563 | y <sub>12</sub>                                 |
| 287.1476 <sup>+2</sup> | y <sub>5</sub> <sup>+2</sup>                                 | 462.6891 <sup>+2</sup> | y <sub>8</sub> <sup>+2</sup>                                  | 603.7911 <sup>+2</sup> | b <sub>12</sub> -H <sub>3</sub> PO <sub>4</sub> <sup>+2</sup> | 924.371                | y <sub>8</sub>                                  | 1304.5518 | b <sub>12</sub>                                 |
| 298.6612 <sup>+2</sup> | b <sub>6</sub> -H <sub>3</sub> PO <sub>4</sub> <sup>+2</sup> | 463.2349 <sup>+2</sup> | y <sub>9</sub> -H <sub>3</sub> PO <sub>4</sub> <sup>+2</sup>  | 604.2658 <sup>+2</sup> | y <sub>11</sub> <sup>+2</sup>                                 | 925.4625               | y <sub>9</sub> -H <sub>3</sub> PO <sub>4</sub>  | 1352.6805 | MH-H <sub>3</sub> PO <sub>4</sub>               |
| 335.6740 <sup>+2</sup> | y <sub>6</sub> <sup>+2</sup>                                 | 503.7513 <sup>+2</sup> | b <sub>10</sub> -H <sub>3</sub> PO <sub>4</sub> <sup>+2</sup> | 647.7818 <sup>+2</sup> | y <sub>12</sub> <sup>+2</sup>                                 | 1006.4952              | b <sub>10</sub> -H <sub>3</sub> PO <sub>4</sub> | 1450.6574 | MH                                              |
| 341.1932               | b <sub>3</sub>                                               | 504.2133 <sup>+2</sup> | b <sub>9</sub> <sup>+2</sup>                                  | 652.7796 <sup>+2</sup> | b <sub>12</sub> <sup>+2</sup>                                 | 1007.4194              | b <sub>9</sub>                                  |           |                                                 |

MS/MS Fragmentation of mALPPQEDATAsPPR  
 Found in IPI00782992, Isoform 1 of Serine/arginine repetitive matrix protein 2

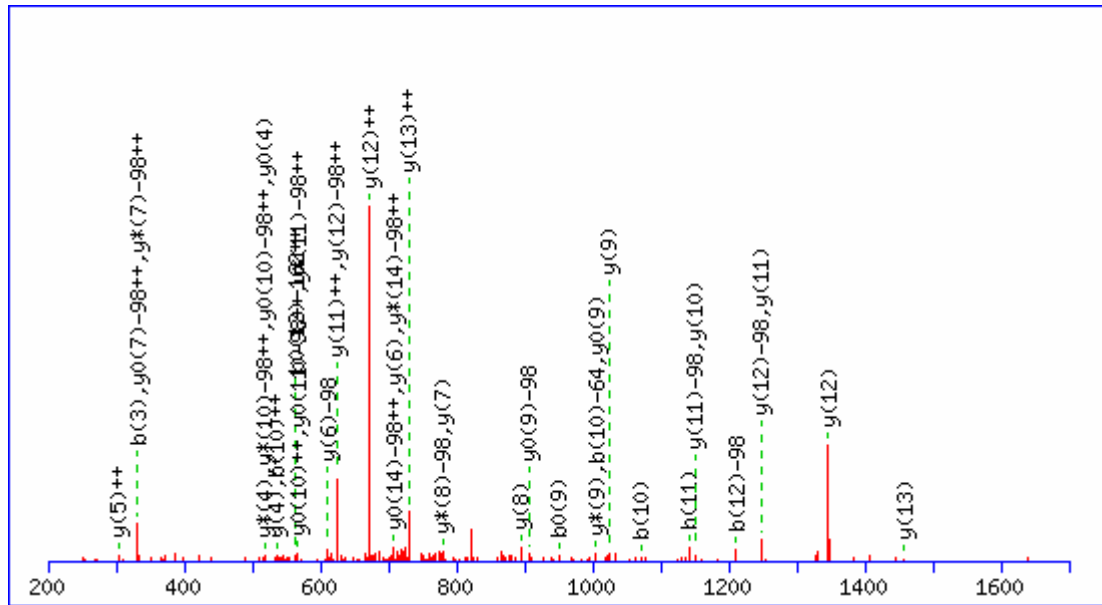

|                        |                                                              |                        |                                                               |                        |                                                               |                        |                                                 |           |                                                 |
|------------------------|--------------------------------------------------------------|------------------------|---------------------------------------------------------------|------------------------|---------------------------------------------------------------|------------------------|-------------------------------------------------|-----------|-------------------------------------------------|
| 88.0631 <sup>+2</sup>  | y <sub>1</sub> <sup>+2</sup>                                 | 369.2245               | y <sub>3</sub>                                                | 607.26                 | y <sub>5</sub>                                                | 789.8827 <sup>+2</sup> | MH-H <sub>3</sub> PO <sub>4</sub> <sup>+2</sup> | 1247.6015 | y <sub>12</sub> -H <sub>3</sub> PO <sub>4</sub> |
| 136.5895 <sup>+2</sup> | y <sub>2</sub> <sup>+2</sup>                                 | 390.1760 <sup>+2</sup> | y <sub>7</sub> <sup>+2</sup>                                  | 610.3307               | y <sub>6</sub> -H <sub>3</sub> PO <sub>4</sub>                | 796.3948               | y <sub>8</sub> -H <sub>3</sub> PO <sub>4</sub>  | 1248.5256 | y <sub>11</sub>                                 |
| 175.119                | y <sub>1</sub>                                               | 398.7010 <sup>+2</sup> | y <sub>8</sub> -H <sub>3</sub> PO <sub>4</sub> <sup>+2</sup>  | 624.3044 <sup>+2</sup> | y <sub>12</sub> -H <sub>3</sub> PO <sub>4</sub> <sup>+2</sup> | 838.8711 <sup>+2</sup> | MH <sup>+2</sup>                                | 1307.5936 | b <sub>13</sub> -H <sub>3</sub> PO <sub>4</sub> |
| 185.1159 <sup>+2</sup> | y <sub>3</sub> <sup>+2</sup>                                 | 429.2166               | b <sub>4</sub>                                                | 624.7664 <sup>+2</sup> | y <sub>11</sub> <sup>+2</sup>                                 | 894.3717               | y <sub>8</sub>                                  | 1308.5178 | b <sub>12</sub>                                 |
| 219.0798               | b <sub>2</sub>                                               | 438.2459               | y <sub>4</sub> -H <sub>3</sub> PO <sub>4</sub>                | 654.328                | b <sub>6</sub>                                                | 898.3975               | b <sub>8</sub>                                  | 1345.5784 | y <sub>12</sub>                                 |
| 219.6266 <sup>+2</sup> | y <sub>4</sub> -H <sub>3</sub> PO <sub>4</sub> <sup>+2</sup> | 447.6895 <sup>+2</sup> | y <sub>8</sub> <sup>+2</sup>                                  | 673.2928 <sup>+2</sup> | y <sub>12</sub> <sup>+2</sup>                                 | 925.4374               | y <sub>9</sub> -H <sub>3</sub> PO <sub>4</sub>  | 1360.6856 | y <sub>13</sub> -H <sub>3</sub> PO <sub>4</sub> |
| 255.1452 <sup>+2</sup> | y <sub>5</sub> -H <sub>3</sub> PO <sub>4</sub> <sup>+2</sup> | 463.2223 <sup>+2</sup> | y <sub>9</sub> -H <sub>3</sub> PO <sub>4</sub> <sup>+2</sup>  | 680.8464 <sup>+2</sup> | y <sub>13</sub> -H <sub>3</sub> PO <sub>4</sub> <sup>+2</sup> | 969.4346               | b <sub>9</sub>                                  | 1404.6464 | b <sub>14</sub> -H <sub>3</sub> PO <sub>4</sub> |
| 268.6151 <sup>+2</sup> | y <sub>4</sub> <sup>+2</sup>                                 | 509.2831               | y <sub>5</sub> -H <sub>3</sub> PO <sub>4</sub>                | 681.3678               | y <sub>7</sub> -H <sub>3</sub> PO <sub>4</sub>                | 1023.4143              | y <sub>9</sub>                                  | 1405.5705 | b <sub>13</sub>                                 |
| 272.1717               | y <sub>2</sub>                                               | 512.2108 <sup>+2</sup> | y <sub>9</sub> <sup>+2</sup>                                  | 708.3076               | y <sub>6</sub>                                                | 1053.496               | y <sub>10</sub> -H <sub>3</sub> PO <sub>4</sub> | 1431.7227 | y <sub>14</sub> -H <sub>3</sub> PO <sub>4</sub> |
| 304.1336 <sup>+2</sup> | y <sub>5</sub> <sup>+2</sup>                                 | 526.2694               | b <sub>5</sub>                                                | 716.3650 <sup>+2</sup> | y <sub>14</sub> -H <sub>3</sub> PO <sub>4</sub> <sup>+2</sup> | 1070.4823              | b <sub>10</sub>                                 | 1458.6625 | y <sub>13</sub>                                 |
| 305.6690 <sup>+2</sup> | y <sub>6</sub> -H <sub>3</sub> PO <sub>4</sub> <sup>+2</sup> | 527.2516 <sup>+2</sup> | y <sub>10</sub> -H <sub>3</sub> PO <sub>4</sub> <sup>+2</sup> | 729.8349 <sup>+2</sup> | y <sub>13</sub> <sup>+2</sup>                                 | 1141.5194              | b <sub>11</sub>                                 | 1502.6233 | b <sub>14</sub>                                 |
| 332.1639               | b <sub>3</sub>                                               | 536.2228               | y <sub>4</sub>                                                | 765.3534 <sup>+2</sup> | y <sub>14</sub> <sup>+2</sup>                                 | 1150.5487              | y <sub>11</sub> -H <sub>3</sub> PO <sub>4</sub> | 1529.6996 | y <sub>14</sub>                                 |
| 341.1876 <sup>+2</sup> | y <sub>7</sub> -H <sub>3</sub> PO <sub>4</sub> <sup>+2</sup> | 575.7780 <sup>+2</sup> | y <sub>11</sub> -H <sub>3</sub> PO <sub>4</sub> <sup>+2</sup> | 779.3447               | y <sub>7</sub>                                                | 1151.4729              | y <sub>10</sub>                                 | 1578.7581 | MH-H <sub>3</sub> PO <sub>4</sub>               |
| 354.6575 <sup>+2</sup> | y <sub>6</sub> <sup>+2</sup>                                 | 576.2401 <sup>+2</sup> | y <sub>10</sub> <sup>+2</sup>                                 | 783.3706               | b <sub>7</sub>                                                | 1210.5409              | b <sub>12</sub> -H <sub>3</sub> PO <sub>4</sub> | 1676.735  | MH                                              |

MS/MS Fragmentation of AGmSSNQSiSsPVLDAVPR  
 Found in IPI00782992, Isoform 1 of Serine/arginine repetitive matrix protein 2

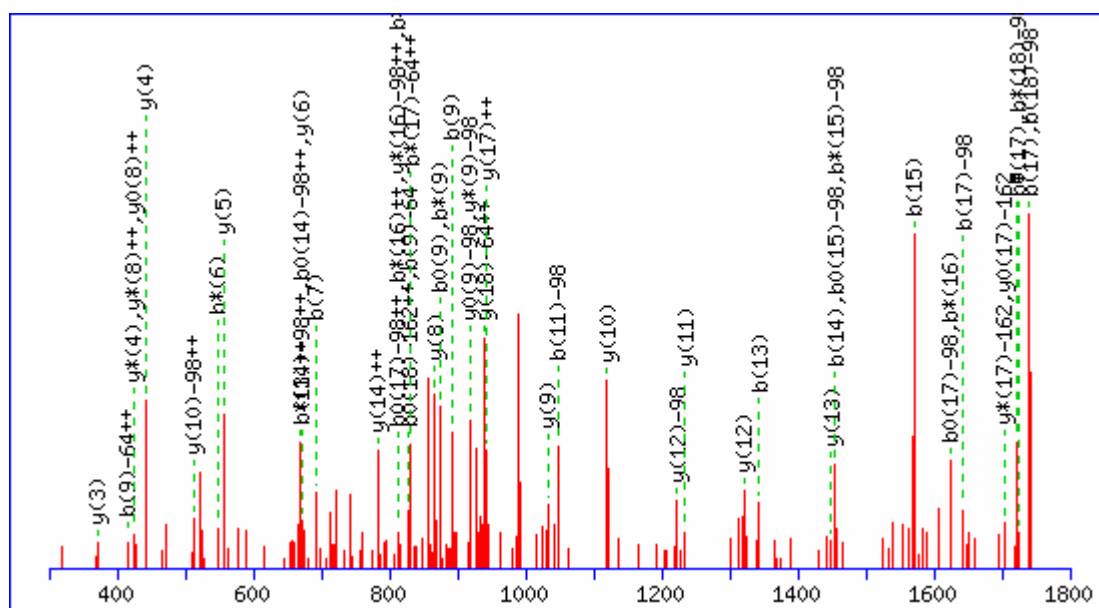

|                        |                                                              |                        |                                                               |                         |                                                               |           |                                                 |           |                                                 |
|------------------------|--------------------------------------------------------------|------------------------|---------------------------------------------------------------|-------------------------|---------------------------------------------------------------|-----------|-------------------------------------------------|-----------|-------------------------------------------------|
| 88.0631 <sup>+2</sup>  | y <sub>1</sub> <sup>+2</sup>                                 | 511.7851 <sup>+2</sup> | y <sub>10</sub> -H <sub>3</sub> PO <sub>4</sub> <sup>+2</sup> | 781.8823 <sup>+2</sup>  | y <sub>14</sub> <sup>+2</sup>                                 | 1120.5398 | y <sub>10</sub>                                 | 1551.8125 | y <sub>15</sub> -H <sub>3</sub> PO <sub>4</sub> |
| 129.0659               | b <sub>2</sub>                                               | 517.2575 <sup>+2</sup> | y <sub>9</sub> <sup>+2</sup>                                  | 819.9259 <sup>+2</sup>  | y <sub>16</sub> -H <sub>3</sub> PO <sub>4</sub> <sup>+2</sup> | 1135.647  | y <sub>11</sub> -H <sub>3</sub> PO <sub>4</sub> | 1562.7574 | y <sub>14</sub>                                 |
| 136.5895 <sup>+2</sup> | y <sub>2</sub> <sup>+2</sup>                                 | 557.3042               | y <sub>5</sub>                                                | 825.3984 <sup>+2</sup>  | y <sub>15</sub> <sup>+2</sup>                                 | 1145.4892 | b <sub>12</sub> -H <sub>3</sub> PO <sub>4</sub> | 1570.6455 | b <sub>15</sub>                                 |
| 175.119                | y <sub>1</sub>                                               | 560.7735 <sup>+2</sup> | y <sub>10</sub> <sup>+2</sup>                                 | 866.5094                | y <sub>8</sub>                                                | 1146.4133 | b <sub>11</sub>                                 | 1638.8446 | y <sub>16</sub> -H <sub>3</sub> PO <sub>4</sub> |
| 186.1237 <sup>+2</sup> | y <sub>3</sub> <sup>+2</sup>                                 | 564.2082               | b <sub>6</sub>                                                | 868.9144 <sup>+2</sup>  | y <sub>16</sub> <sup>+2</sup>                                 | 1222.679  | y <sub>12</sub> -H <sub>3</sub> PO <sub>4</sub> | 1641.6826 | b <sub>16</sub>                                 |
| 221.6423 <sup>+2</sup> | y <sub>4</sub> <sup>+2</sup>                                 | 568.3271 <sup>+2</sup> | y <sub>11</sub> -H <sub>3</sub> PO <sub>4</sub> <sup>+2</sup> | 892.3829                | b <sub>9</sub>                                                | 1233.6239 | y <sub>11</sub>                                 | 1642.7741 | b <sub>17</sub> -H <sub>3</sub> PO <sub>4</sub> |
| 272.1717               | y <sub>2</sub>                                               | 611.8431 <sup>+2</sup> | y <sub>12</sub> -H <sub>3</sub> PO <sub>4</sub> <sup>+2</sup> | 893.4436 <sup>+2</sup>  | y <sub>17</sub> -H <sub>3</sub> PO <sub>4</sub> <sup>+2</sup> | 1243.4661 | b <sub>12</sub>                                 | 1649.7894 | y <sub>15</sub>                                 |
| 276.1013               | b <sub>3</sub>                                               | 617.3156 <sup>+2</sup> | y <sub>11</sub> <sup>+2</sup>                                 | 921.9544 <sup>+2</sup>  | y <sub>18</sub> -H <sub>3</sub> PO <sub>4</sub> <sup>+2</sup> | 1244.5576 | b <sub>13</sub> -H <sub>3</sub> PO <sub>4</sub> | 1736.8215 | y <sub>16</sub>                                 |
| 279.1557 <sup>+2</sup> | y <sub>5</sub> <sup>+2</sup>                                 | 660.8316 <sup>+2</sup> | y <sub>12</sub> <sup>+2</sup>                                 | 935.5309                | y <sub>9</sub> -H <sub>3</sub> PO <sub>4</sub>                | 1320.6559 | y <sub>12</sub>                                 | 1739.8269 | b <sub>18</sub> -H <sub>3</sub> PO <sub>4</sub> |
| 335.6978 <sup>+2</sup> | y <sub>6</sub> <sup>+2</sup>                                 | 670.3883               | y <sub>6</sub>                                                | 942.4321 <sup>+2</sup>  | y <sub>17</sub> <sup>+2</sup>                                 | 1342.5345 | b <sub>13</sub>                                 | 1740.751  | b <sub>17</sub>                                 |
| 363.1333               | b <sub>4</sub>                                               | 675.8724 <sup>+2</sup> | y <sub>13</sub> -H <sub>3</sub> PO <sub>4</sub> <sup>+2</sup> | 957.4729 <sup>+2</sup>  | MH-H <sub>3</sub> PO <sub>4</sub> <sup>+2</sup>               | 1350.7376 | y <sub>13</sub> -H <sub>3</sub> PO <sub>4</sub> | 1785.88   | y <sub>17</sub> -H <sub>3</sub> PO <sub>4</sub> |
| 371.2401               | y <sub>3</sub>                                               | 692.2668               | b <sub>7</sub>                                                | 970.9428 <sup>+2</sup>  | y <sub>18</sub> <sup>+2</sup>                                 | 1357.6416 | b <sub>14</sub> -H <sub>3</sub> PO <sub>4</sub> | 1837.8038 | b <sub>18</sub>                                 |
| 385.2320 <sup>+2</sup> | y <sub>7</sub> <sup>+2</sup>                                 | 724.8609 <sup>+2</sup> | y <sub>13</sub> <sup>+2</sup>                                 | 979.4149                | b <sub>10</sub>                                               | 1448.7145 | y <sub>13</sub>                                 | 1842.9014 | y <sub>18</sub> -H <sub>3</sub> PO <sub>4</sub> |
| 433.7584 <sup>+2</sup> | y <sub>8</sub> <sup>+2</sup>                                 | 732.8939 <sup>+2</sup> | y <sub>14</sub> -H <sub>3</sub> PO <sub>4</sub> <sup>+2</sup> | 1006.4614 <sup>+2</sup> | MH <sup>+2</sup>                                              | 1455.6185 | b <sub>14</sub>                                 | 1883.8569 | y <sub>17</sub>                                 |
| 442.2772               | y <sub>4</sub>                                               | 769.4567               | y <sub>7</sub>                                                | 1022.5629               | y <sub>10</sub> -H <sub>3</sub> PO <sub>4</sub>               | 1464.7805 | y <sub>14</sub> -H <sub>3</sub> PO <sub>4</sub> | 1913.9386 | MH-H <sub>3</sub> PO <sub>4</sub>               |
| 450.1653               | b <sub>5</sub>                                               | 776.4099 <sup>+2</sup> | y <sub>15</sub> -H <sub>3</sub> PO <sub>4</sub> <sup>+2</sup> | 1033.5078               | y <sub>9</sub>                                                | 1472.6686 | b <sub>15</sub> -H <sub>3</sub> PO <sub>4</sub> | 1940.8783 | y <sub>18</sub>                                 |
| 468.2691 <sup>+2</sup> | y <sub>9</sub> -H <sub>3</sub> PO <sub>4</sub> <sup>+2</sup> | 779.2988               | b <sub>8</sub>                                                | 1048.4364               | b <sub>11</sub> -H <sub>3</sub> PO <sub>4</sub>               | 1543.7057 | b <sub>16</sub> -H <sub>3</sub> PO <sub>4</sub> | 2011.9154 | MH                                              |

MS/MS Fragmentation of ELNSPLRENSFGSPLEFR  
 Found in IPI00782992, Isoform 1 of Serine/arginine repetitive matrix protein 2

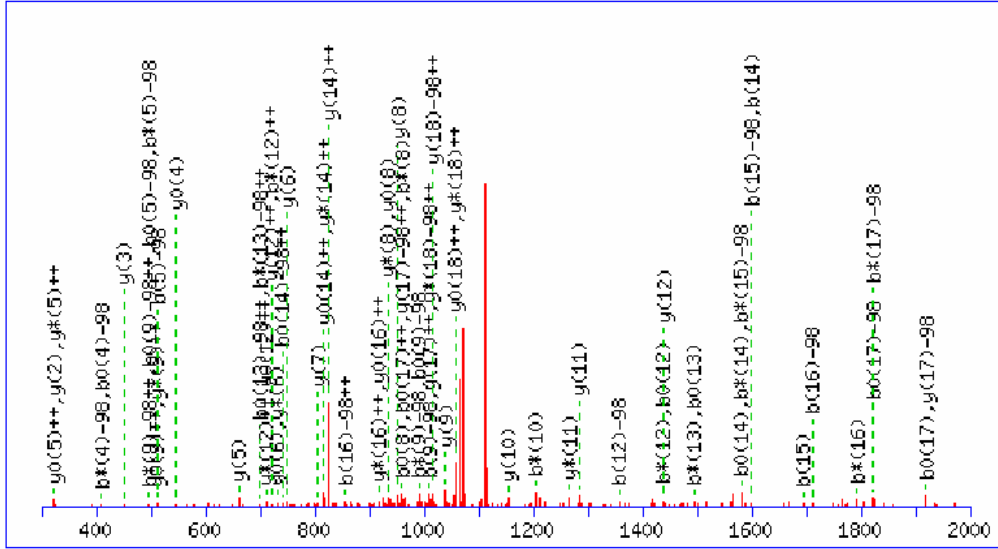

|                        |                                                              |                        |                                                               |                        |                                                               |                         |                                                               |           |                                                 |
|------------------------|--------------------------------------------------------------|------------------------|---------------------------------------------------------------|------------------------|---------------------------------------------------------------|-------------------------|---------------------------------------------------------------|-----------|-------------------------------------------------|
| 88.0631 <sup>+2</sup>  | y <sub>1</sub> <sup>+2</sup>                                 | 524.1752               | b <sub>4</sub>                                                | 756.3299 <sup>+2</sup> | b <sub>13</sub> <sup>+2</sup>                                 | 1008.9624 <sup>+2</sup> | y <sub>17</sub> <sup>+2</sup>                                 | 1551.7914 | y <sub>13</sub>                                 |
| 161.5973 <sup>+2</sup> | y <sub>2</sub> <sup>+2</sup>                                 | 553.7475 <sup>+2</sup> | b <sub>9</sub> <sup>+2</sup>                                  | 776.3993 <sup>+2</sup> | y <sub>13</sub> <sup>+2</sup>                                 | 1016.5160 <sup>+2</sup> | y <sub>18</sub> -H <sub>3</sub> PO <sub>4</sub> <sup>+2</sup> | 1597.7605 | b <sub>15</sub> -H <sub>3</sub> PO <sub>4</sub> |
| 175.119                | y <sub>1</sub>                                               | 561.7805 <sup>+2</sup> | b <sub>10</sub> -H <sub>3</sub> PO <sub>4</sub> <sup>+2</sup> | 799.3839 <sup>+2</sup> | b <sub>15</sub> -H <sub>3</sub> PO <sub>4</sub> <sup>+2</sup> | 1039.5207               | y <sub>9</sub>                                                | 1598.6846 | b <sub>14</sub>                                 |
| 226.1186 <sup>+2</sup> | y <sub>3</sub> <sup>+2</sup>                                 | 564.314                | y <sub>4</sub>                                                | 799.8460 <sup>+2</sup> | b <sub>14</sub> <sup>+2</sup>                                 | 1042.9699 <sup>+2</sup> | b <sub>18</sub> <sup>+2</sup>                                 | 1648.8442 | y <sub>14</sub>                                 |
| 243.1339               | b <sub>2</sub>                                               | 577.2855 <sup>+2</sup> | y <sub>10</sub> <sup>+2</sup>                                 | 805.4203               | y <sub>7</sub>                                                | 1065.5044 <sup>+2</sup> | y <sub>18</sub> <sup>+2</sup>                                 | 1695.7374 | b <sub>15</sub>                                 |
| 282.6606 <sup>+2</sup> | y <sub>4</sub> <sup>+2</sup>                                 | 605.2966 <sup>+2</sup> | b <sub>11</sub> -H <sub>3</sub> PO <sub>4</sub> <sup>+2</sup> | 821.3441               | b <sub>7</sub>                                                | 1081.0373 <sup>+2</sup> | MH-H <sub>3</sub> PO <sub>4</sub> <sup>+2</sup>               | 1710.8446 | b <sub>16</sub> -H <sub>3</sub> PO <sub>4</sub> |
| 312.1554               | b <sub>3</sub> -H <sub>3</sub> PO <sub>4</sub>               | 610.2831               | b <sub>6</sub> -H <sub>3</sub> PO <sub>4</sub>                | 824.9257 <sup>+2</sup> | y <sub>14</sub> <sup>+2</sup>                                 | 1106.4878               | b <sub>9</sub>                                                | 1735.8762 | y <sub>15</sub>                                 |
| 322.1874               | y <sub>2</sub>                                               | 610.7690 <sup>+2</sup> | b <sub>10</sub> <sup>+2</sup>                                 | 848.3723 <sup>+2</sup> | b <sub>15</sub> <sup>+2</sup>                                 | 1122.5538               | b <sub>10</sub> -H <sub>3</sub> PO <sub>4</sub>               | 1808.8215 | b <sub>16</sub>                                 |
| 331.1870 <sup>+2</sup> | y <sub>5</sub> <sup>+2</sup>                                 | 611.2072               | b <sub>5</sub>                                                | 855.9259 <sup>+2</sup> | b <sub>16</sub> -H <sub>3</sub> PO <sub>4</sub> <sup>+2</sup> | 1130.0257 <sup>+2</sup> | MH <sup>+2</sup>                                              | 1839.8872 | b <sub>17</sub> -H <sub>3</sub> PO <sub>4</sub> |
| 374.7030 <sup>+2</sup> | y <sub>6</sub> <sup>+2</sup>                                 | 641.8068 <sup>+2</sup> | y <sub>11</sub> <sup>+2</sup>                                 | 868.4417 <sup>+2</sup> | y <sub>15</sub> <sup>+2</sup>                                 | 1153.5636               | y <sub>10</sub>                                               | 1849.9191 | y <sub>16</sub>                                 |
| 403.2138 <sup>+2</sup> | y <sub>7</sub> <sup>+2</sup>                                 | 654.2850 <sup>+2</sup> | b <sub>11</sub> <sup>+2</sup>                                 | 879.4683               | b <sub>8</sub> -H <sub>3</sub> PO <sub>4</sub>                | 1209.5858               | b <sub>11</sub> -H <sub>3</sub> PO <sub>4</sub>               | 1918.9406 | y <sub>17</sub> -H <sub>3</sub> PO <sub>4</sub> |
| 410.1323               | b <sub>3</sub>                                               | 661.3668               | y <sub>5</sub>                                                | 904.9144 <sup>+2</sup> | b <sub>16</sub> <sup>+2</sup>                                 | 1220.5307               | b <sub>10</sub>                                               | 1937.8641 | b <sub>17</sub>                                 |
| 426.1983               | b <sub>4</sub> -H <sub>3</sub> PO <sub>4</sub>               | 678.8308 <sup>+2</sup> | b <sub>12</sub> -H <sub>3</sub> PO <sub>4</sub> <sup>+2</sup> | 920.4472 <sup>+2</sup> | b <sub>17</sub> -H <sub>3</sub> PO <sub>4</sub> <sup>+2</sup> | 1282.6062               | y <sub>11</sub>                                               | 1986.9556 | b <sub>18</sub> -H <sub>3</sub> PO <sub>4</sub> |
| 440.2378 <sup>+2</sup> | b <sub>8</sub> -H <sub>3</sub> PO <sub>4</sub> <sup>+2</sup> | 707.3415 <sup>+2</sup> | b <sub>13</sub> -H <sub>3</sub> PO <sub>4</sub> <sup>+2</sup> | 925.4632 <sup>+2</sup> | y <sub>16</sub> <sup>+2</sup>                                 | 1307.5627               | b <sub>11</sub>                                               | 2016.9175 | y <sub>17</sub>                                 |
| 451.23                 | y <sub>3</sub>                                               | 708.26                 | b <sub>6</sub>                                                | 952.4887               | y <sub>8</sub>                                                | 1356.6543               | b <sub>12</sub> -H <sub>3</sub> PO <sub>4</sub>               | 2032.0247 | y <sub>18</sub> -H <sub>3</sub> PO <sub>4</sub> |
| 476.7480 <sup>+2</sup> | y <sub>8</sub> <sup>+2</sup>                                 | 719.8573 <sup>+2</sup> | y <sub>12</sub> <sup>+2</sup>                                 | 959.9739 <sup>+2</sup> | y <sub>17</sub> -H <sub>3</sub> PO <sub>4</sub> <sup>+2</sup> | 1413.6757               | b <sub>13</sub> -H <sub>3</sub> PO <sub>4</sub>               | 2084.9325 | b <sub>18</sub>                                 |
| 489.2262 <sup>+2</sup> | b <sub>8</sub> <sup>+2</sup>                                 | 723.3672               | b <sub>7</sub> -H <sub>3</sub> PO <sub>4</sub>                | 969.4357 <sup>+2</sup> | b <sub>17</sub> <sup>+2</sup>                                 | 1438.7074               | y <sub>12</sub>                                               | 2130.0016 | y <sub>18</sub>                                 |
| 504.7591 <sup>+2</sup> | b <sub>9</sub> -H <sub>3</sub> PO <sub>4</sub> <sup>+2</sup> | 727.8192 <sup>+2</sup> | b <sub>12</sub> <sup>+2</sup>                                 | 977.4452               | b <sub>8</sub>                                                | 1454.6311               | b <sub>12</sub>                                               | 2161.0673 | MH-H <sub>3</sub> PO <sub>4</sub>               |
| 513.2304               | b <sub>5</sub> -H <sub>3</sub> PO <sub>4</sub>               | 748.3988               | y <sub>6</sub>                                                | 993.9814 <sup>+2</sup> | b <sub>18</sub> -H <sub>3</sub> PO <sub>4</sub> <sup>+2</sup> | 1500.7077               | b <sub>14</sub> -H <sub>3</sub> PO <sub>4</sub>               | 2259.0442 | MH                                              |
| 520.2640 <sup>+2</sup> | y <sub>9</sub> <sup>+2</sup>                                 | 750.8575 <sup>+2</sup> | b <sub>14</sub> -H <sub>3</sub> PO <sub>4</sub> <sup>+2</sup> | 1008.5109              | b <sub>9</sub> -H <sub>3</sub> PO <sub>4</sub>                | 1511.6526               | b <sub>13</sub>                                               |           |                                                 |

MS/MS Fragmentation of LGPELSPSTSPtATSTTPSR  
 Found in IPI00000893, Similar to butyrate response factor 2

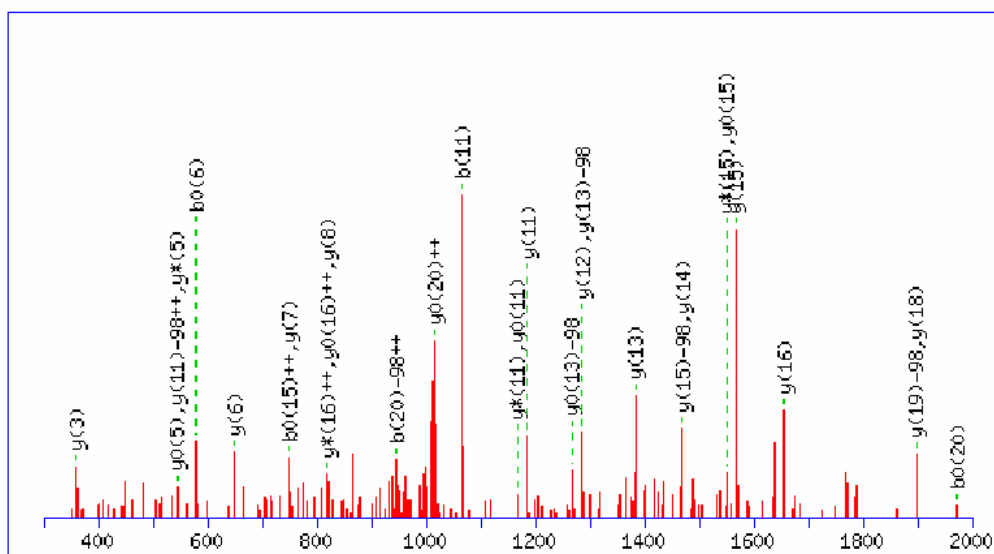

|                        |                                                               |                        |                                                               |                         |                                                               |           |                                                 |           |                                                 |
|------------------------|---------------------------------------------------------------|------------------------|---------------------------------------------------------------|-------------------------|---------------------------------------------------------------|-----------|-------------------------------------------------|-----------|-------------------------------------------------|
| 88.0631 <sup>+2</sup>  | y <sub>1</sub> <sup>+2</sup>                                  | 544.2726 <sup>+2</sup> | y <sub>11</sub> -H <sub>3</sub> PO <sub>4</sub> <sup>+2</sup> | 827.8696 <sup>+2</sup>  | y <sub>16</sub> <sup>+2</sup>                                 | 1163.5943 | b <sub>12</sub>                                 | 1606.7959 | b <sub>17</sub> -H <sub>3</sub> PO <sub>4</sub> |
| 131.5791 <sup>+2</sup> | y <sub>2</sub> <sup>+2</sup>                                  | 549.7450 <sup>+2</sup> | y <sub>10</sub> <sup>+2</sup>                                 | 835.4232 <sup>+2</sup>  | y <sub>17</sub> -H <sub>3</sub> PO <sub>4</sub> <sup>+2</sup> | 1185.5147 | y <sub>11</sub>                                 | 1654.732  | y <sub>16</sub>                                 |
| 171.1128               | b <sub>2</sub>                                                | 561.2991               | y <sub>5</sub>                                                | 878.4618                | b <sub>9</sub>                                                | 1188.5855 | y <sub>12</sub> -H <sub>3</sub> PO <sub>4</sub> | 1669.8392 | y <sub>17</sub> -H <sub>3</sub> PO <sub>4</sub> |
| 175.119                | y <sub>1</sub>                                                | 593.2610 <sup>+2</sup> | y <sub>11</sub> <sup>+2</sup>                                 | 884.4117 <sup>+2</sup>  | y <sub>17</sub> <sup>+2</sup>                                 | 1246.6314 | b <sub>13</sub> -H <sub>3</sub> PO <sub>4</sub> | 1704.7728 | b <sub>17</sub>                                 |
| 180.1055 <sup>+2</sup> | y <sub>3</sub> <sup>+2</sup>                                  | 594.7964 <sup>+2</sup> | y <sub>12</sub> -H <sub>3</sub> PO <sub>4</sub> <sup>+2</sup> | 899.9445 <sup>+2</sup>  | y <sub>18</sub> -H <sub>3</sub> PO <sub>4</sub> <sup>+2</sup> | 1285.6383 | y <sub>13</sub> -H <sub>3</sub> PO <sub>4</sub> | 1707.8436 | b <sub>18</sub> -H <sub>3</sub> PO <sub>4</sub> |
| 230.6293 <sup>+2</sup> | y <sub>4</sub> <sup>+2</sup>                                  | 597.3243               | b <sub>6</sub>                                                | 903.453                 | y <sub>9</sub> -H <sub>3</sub> PO <sub>4</sub>                | 1286.5624 | y <sub>12</sub>                                 | 1767.8161 | y <sub>17</sub>                                 |
| 262.151                | y <sub>2</sub>                                                | 643.3228 <sup>+2</sup> | y <sub>13</sub> -H <sub>3</sub> PO <sub>4</sub> <sup>+2</sup> | 948.4709 <sup>+2</sup>  | y <sub>19</sub> -H <sub>3</sub> PO <sub>4</sub> <sup>+2</sup> | 1317.6685 | b <sub>14</sub> -H <sub>3</sub> PO <sub>4</sub> | 1798.8817 | y <sub>18</sub> -H <sub>3</sub> PO <sub>4</sub> |
| 268.1656               | b <sub>3</sub>                                                | 643.7848 <sup>+2</sup> | y <sub>12</sub> <sup>+2</sup>                                 | 948.9330 <sup>+2</sup>  | y <sub>18</sub> <sup>+2</sup>                                 | 1344.6083 | b <sub>13</sub>                                 | 1804.8963 | b <sub>19</sub> -H <sub>3</sub> PO <sub>4</sub> |
| 281.1532 <sup>+2</sup> | y <sub>5</sub> <sup>+2</sup>                                  | 648.3311               | y <sub>6</sub>                                                | 976.9816 <sup>+2</sup>  | y <sub>20</sub> -H <sub>3</sub> PO <sub>4</sub> <sup>+2</sup> | 1372.6703 | y <sub>14</sub> -H <sub>3</sub> PO <sub>4</sub> | 1805.8205 | b <sub>18</sub>                                 |
| 324.6692 <sup>+2</sup> | y <sub>6</sub> <sup>+2</sup>                                  | 686.8388 <sup>+2</sup> | y <sub>14</sub> -H <sub>3</sub> PO <sub>4</sub> <sup>+2</sup> | 979.5095                | b <sub>10</sub>                                               | 1383.6152 | y <sub>13</sub>                                 | 1891.9284 | b <sub>20</sub> -H <sub>3</sub> PO <sub>4</sub> |
| 359.2037               | y <sub>3</sub>                                                | 692.3112 <sup>+2</sup> | y <sub>13</sub> <sup>+2</sup>                                 | 997.4593 <sup>+2</sup>  | y <sub>19</sub> <sup>+2</sup>                                 | 1415.6454 | b <sub>14</sub>                                 | 1895.9345 | y <sub>19</sub> -H <sub>3</sub> PO <sub>4</sub> |
| 375.1930 <sup>+2</sup> | y <sub>7</sub> <sup>+2</sup>                                  | 694.377                | b <sub>7</sub>                                                | 1000.5058               | y <sub>10</sub> -H <sub>3</sub> PO <sub>4</sub>               | 1418.7162 | b <sub>15</sub> -H <sub>3</sub> PO <sub>4</sub> | 1896.8586 | y <sub>18</sub>                                 |
| 397.2082               | b <sub>4</sub>                                                | 735.3652 <sup>+2</sup> | y <sub>15</sub> -H <sub>3</sub> PO <sub>4</sub> <sup>+2</sup> | 1001.4299               | y <sub>9</sub>                                                | 1469.7231 | y <sub>15</sub> -H <sub>3</sub> PO <sub>4</sub> | 1902.8732 | b <sub>19</sub>                                 |
| 410.7116 <sup>+2</sup> | y <sub>8</sub> <sup>+2</sup>                                  | 735.8272 <sup>+2</sup> | y <sub>14</sub> <sup>+2</sup>                                 | 1025.9701 <sup>+2</sup> | y <sub>20</sub> <sup>+2</sup>                                 | 1470.6472 | y <sub>14</sub>                                 | 1952.956  | y <sub>20</sub> -H <sub>3</sub> PO <sub>4</sub> |
| 452.2302 <sup>+2</sup> | y <sub>9</sub> -H <sub>3</sub> PO <sub>4</sub> <sup>+2</sup>  | 749.3788               | y <sub>7</sub>                                                | 1033.5237 <sup>+2</sup> | MH-H <sub>3</sub> PO <sub>4</sub> <sup>+2</sup>               | 1505.7482 | b <sub>16</sub> -H <sub>3</sub> PO <sub>4</sub> | 1989.9053 | b <sub>20</sub>                                 |
| 460.2514               | y <sub>4</sub>                                                | 778.8812 <sup>+2</sup> | y <sub>16</sub> -H <sub>3</sub> PO <sub>4</sub> <sup>+2</sup> | 1066.5415               | b <sub>11</sub>                                               | 1516.6931 | b <sub>15</sub>                                 | 1993.9114 | y <sub>19</sub>                                 |
| 500.7565 <sup>+2</sup> | y <sub>10</sub> -H <sub>3</sub> PO <sub>4</sub> <sup>+2</sup> | 781.409                | b <sub>8</sub>                                                | 1082.5121 <sup>+2</sup> | MH <sup>+2</sup>                                              | 1556.7551 | y <sub>16</sub> -H <sub>3</sub> PO <sub>4</sub> | 2050.9329 | y <sub>20</sub>                                 |
| 501.2186 <sup>+2</sup> | y <sub>9</sub> <sup>+2</sup>                                  | 784.3536 <sup>+2</sup> | y <sub>15</sub> <sup>+2</sup>                                 | 1087.5378               | y <sub>11</sub> -H <sub>3</sub> PO <sub>4</sub>               | 1567.7    | y <sub>15</sub>                                 | 2066.04   | MH-H <sub>3</sub> PO <sub>4</sub>               |
| 510.2922               | b <sub>5</sub>                                                | 820.4159               | y <sub>8</sub>                                                | 1098.4827               | y <sub>10</sub>                                               | 1603.7251 | b <sub>16</sub>                                 | 2164.0169 | MH                                              |

MS/MS Fragmentation of ANsTSDSVFTETPSPVLK  
 Found in IPI00294391, Cdc42 effector protein 3

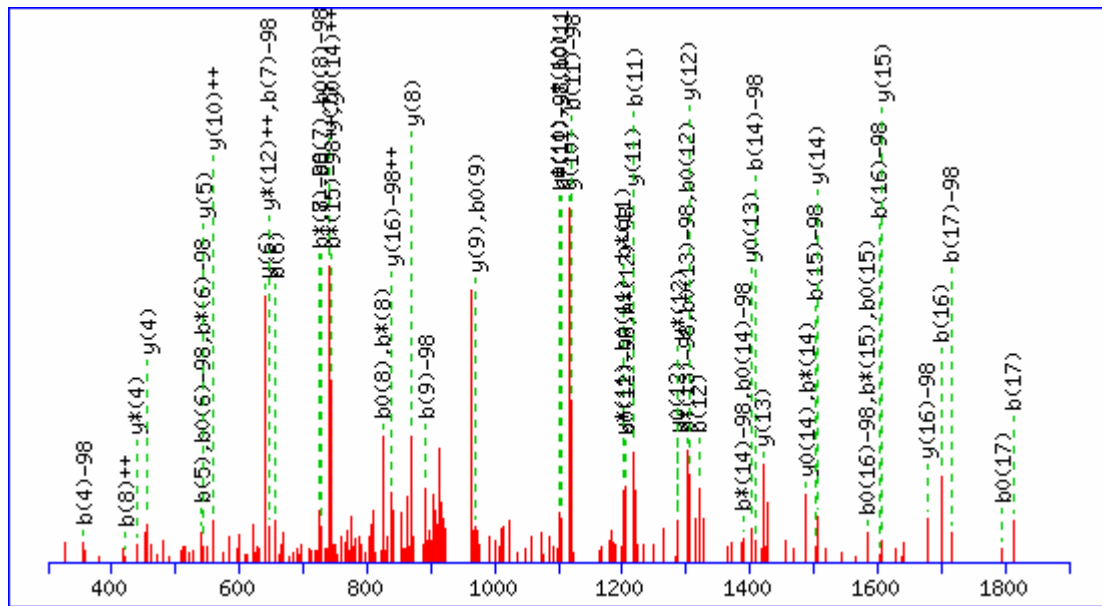

|                        |                                                |                        |                                                |                        |                                                               |           |                                                 |           |                                                 |
|------------------------|------------------------------------------------|------------------------|------------------------------------------------|------------------------|---------------------------------------------------------------|-----------|-------------------------------------------------|-----------|-------------------------------------------------|
| 74.0600 <sup>+2</sup>  | y <sub>1</sub> <sup>+2</sup>                   | 443.1885               | b <sub>5</sub> -H <sub>3</sub> PO <sub>4</sub> | 743.2244               | b <sub>7</sub>                                                | 992.432   | b <sub>10</sub> -H <sub>3</sub> PO <sub>4</sub> | 1506.7686 | y <sub>14</sub>                                 |
| 130.6021 <sup>+2</sup> | y <sub>2</sub> <sup>+2</sup>                   | 454.1334               | b <sub>4</sub>                                 | 744.3159               | b <sub>8</sub> -H <sub>3</sub> PO <sub>4</sub>                | 1090.4089 | b <sub>10</sub>                                 | 1601.6367 | b <sub>15</sub>                                 |
| 147.1128               | y <sub>1</sub>                                 | 456.318                | y <sub>4</sub>                                 | 753.8879 <sup>+2</sup> | y <sub>14</sub> <sup>+2</sup>                                 | 1118.6092 | y <sub>10</sub>                                 | 1602.7282 | b <sub>16</sub> -H <sub>3</sub> PO <sub>4</sub> |
| 180.1363 <sup>+2</sup> | y <sub>3</sub> <sup>+2</sup>                   | 486.2740 <sup>+2</sup> | y <sub>9</sub> <sup>+2</sup>                   | 804.4118 <sup>+2</sup> | y <sub>15</sub> <sup>+2</sup>                                 | 1121.4746 | b <sub>11</sub> -H <sub>3</sub> PO <sub>4</sub> | 1607.8163 | y <sub>15</sub>                                 |
| 186.0873               | b <sub>2</sub>                                 | 541.1654               | b <sub>5</sub>                                 | 838.9225 <sup>+2</sup> | y <sub>16</sub> -H <sub>3</sub> PO <sub>4</sub> <sup>+2</sup> | 1217.6776 | y <sub>11</sub>                                 | 1676.8378 | y <sub>16</sub> -H <sub>3</sub> PO <sub>4</sub> |
| 228.6627 <sup>+2</sup> | y <sub>4</sub> <sup>+2</sup>                   | 543.3501               | y <sub>5</sub>                                 | 842.2928               | b <sub>8</sub>                                                | 1219.4515 | b <sub>11</sub>                                 | 1700.7051 | b <sub>16</sub>                                 |
| 255.1088               | b <sub>3</sub> -H <sub>3</sub> PO <sub>4</sub> | 558.2154               | b <sub>6</sub> -H <sub>3</sub> PO <sub>4</sub> | 870.4931               | y <sub>8</sub>                                                | 1222.5222 | b <sub>12</sub> -H <sub>3</sub> PO <sub>4</sub> | 1715.8123 | b <sub>17</sub> -H <sub>3</sub> PO <sub>4</sub> |
| 260.1969               | y <sub>2</sub>                                 | 559.8082 <sup>+2</sup> | y <sub>10</sub> <sup>+2</sup>                  | 887.9110 <sup>+2</sup> | y <sub>16</sub> <sup>+2</sup>                                 | 1304.7096 | y <sub>12</sub>                                 | 1774.8147 | y <sub>16</sub>                                 |
| 272.1787 <sup>+2</sup> | y <sub>5</sub> <sup>+2</sup>                   | 609.3424 <sup>+2</sup> | y <sub>11</sub> <sup>+2</sup>                  | 891.3843               | b <sub>9</sub> -H <sub>3</sub> PO <sub>4</sub>                | 1319.575  | b <sub>13</sub> -H <sub>3</sub> PO <sub>4</sub> | 1790.8807 | y <sub>17</sub> -H <sub>3</sub> PO <sub>4</sub> |
| 320.7051 <sup>+2</sup> | y <sub>6</sub> <sup>+2</sup>                   | 640.4028               | y <sub>6</sub>                                 | 895.9440 <sup>+2</sup> | y <sub>17</sub> -H <sub>3</sub> PO <sub>4</sub> <sup>+2</sup> | 1320.4991 | b <sub>12</sub>                                 | 1813.7892 | b <sub>17</sub>                                 |
| 353.0857               | b <sub>3</sub>                                 | 645.2475               | b <sub>7</sub> -H <sub>3</sub> PO <sub>4</sub> | 931.4625 <sup>+2</sup> | MH-H <sub>3</sub> PO <sub>4</sub> <sup>+2</sup>               | 1406.607  | b <sub>14</sub> -H <sub>3</sub> PO <sub>4</sub> | 1861.9178 | MH-H <sub>3</sub> PO <sub>4</sub>               |
| 356.1565               | b <sub>4</sub> -H <sub>3</sub> PO <sub>4</sub> | 652.8585 <sup>+2</sup> | y <sub>12</sub> <sup>+2</sup>                  | 944.9324 <sup>+2</sup> | y <sub>17</sub> <sup>+2</sup>                                 | 1417.5519 | b <sub>13</sub>                                 | 1888.8576 | y <sub>17</sub>                                 |
| 359.2653               | y <sub>3</sub>                                 | 656.1923               | b <sub>6</sub>                                 | 971.5408               | y <sub>9</sub>                                                | 1419.7366 | y <sub>13</sub>                                 | 1959.8947 | MH                                              |
| 371.2289 <sup>+2</sup> | y <sub>7</sub> <sup>+2</sup>                   | 710.3719 <sup>+2</sup> | y <sub>13</sub> <sup>+2</sup>                  | 980.4510 <sup>+2</sup> | MH <sup>+2</sup>                                              | 1503.6598 | b <sub>15</sub> -H <sub>3</sub> PO <sub>4</sub> |           |                                                 |
| 435.7502 <sup>+2</sup> | y <sub>8</sub> <sup>+2</sup>                   | 741.4505               | y <sub>7</sub>                                 | 989.3612               | b <sub>9</sub>                                                | 1504.5839 | b <sub>14</sub>                                 |           |                                                 |

MS/MS Fragmentation of RLsEQLAHTPTAFK  
 Found in IPI00165547, Isoform 2 of Phosphatidylinositol 4-kinase beta

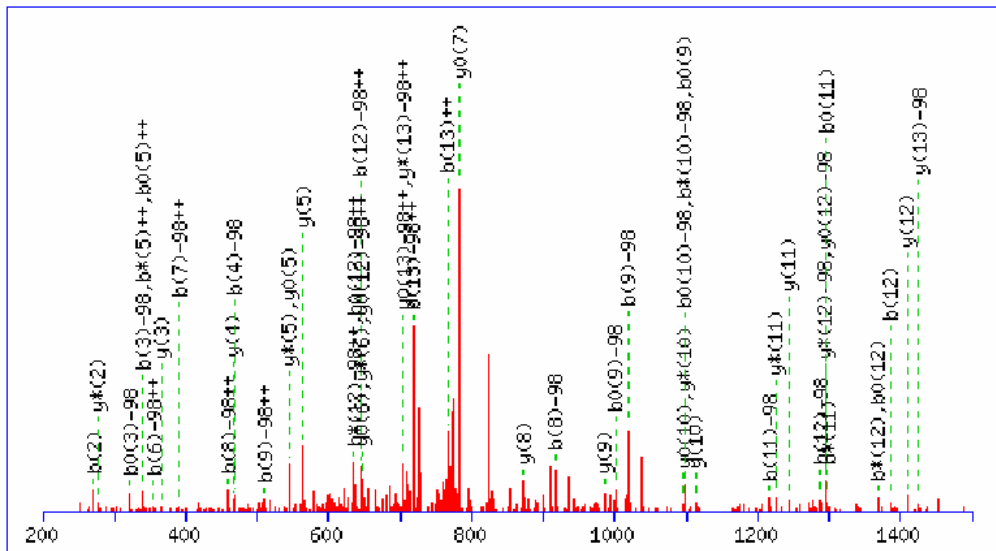

|                        |                                                              |                        |                                                              |                        |                                                               |                        |                                                               |           |                                                 |
|------------------------|--------------------------------------------------------------|------------------------|--------------------------------------------------------------|------------------------|---------------------------------------------------------------|------------------------|---------------------------------------------------------------|-----------|-------------------------------------------------|
| 74.0600 <sup>+2</sup>  | y <sub>1</sub> <sup>+2</sup>                                 | 347.6496 <sup>+2</sup> | b <sub>5</sub> <sup>+2</sup>                                 | 558.3014 <sup>+2</sup> | b <sub>10</sub> -H <sub>3</sub> PO <sub>4</sub> <sup>+2</sup> | 712.8803 <sup>+2</sup> | y <sub>13</sub> -H <sub>3</sub> PO <sub>4</sub> <sup>+2</sup> | 1115.5956 | b <sub>10</sub> -H <sub>3</sub> PO <sub>4</sub> |
| 135.5999 <sup>+2</sup> | b <sub>2</sub> <sup>+2</sup>                                 | 355.2032 <sup>+2</sup> | b <sub>6</sub> -H <sub>3</sub> PO <sub>4</sub> <sup>+2</sup> | 558.7635 <sup>+2</sup> | b <sub>9</sub> <sup>+2</sup>                                  | 717.8781 <sup>+2</sup> | b <sub>13</sub> -H <sub>3</sub> PO <sub>4</sub> <sup>+2</sup> | 1116.5197 | b <sub>9</sub>                                  |
| 147.1128               | y <sub>1</sub>                                               | 365.2183               | y <sub>3</sub>                                               | 563.3188               | y <sub>5</sub>                                                | 761.8687 <sup>+2</sup> | y <sub>13</sub> <sup>+2</sup>                                 | 1213.5725 | b <sub>10</sub>                                 |
| 147.5942 <sup>+2</sup> | y <sub>2</sub> <sup>+2</sup>                                 | 390.7218 <sup>+2</sup> | b <sub>7</sub> -H <sub>3</sub> PO <sub>4</sub> <sup>+2</sup> | 566.2334               | b <sub>4</sub>                                                | 766.8665 <sup>+2</sup> | b <sub>13</sub> <sup>+2</sup>                                 | 1216.6433 | b <sub>11</sub> -H <sub>3</sub> PO <sub>4</sub> |
| 170.1106 <sup>+2</sup> | b <sub>3</sub> -H <sub>3</sub> PO <sub>4</sub> <sup>+2</sup> | 401.2163 <sup>+2</sup> | y <sub>7</sub> <sup>+2</sup>                                 | 596.3151               | b <sub>5</sub> -H <sub>3</sub> PO <sub>4</sub>                | 780.4363               | b <sub>7</sub> -H <sub>3</sub> PO <sub>4</sub>                | 1242.6477 | y <sub>11</sub>                                 |
| 183.1128 <sup>+2</sup> | y <sub>3</sub> <sup>+2</sup>                                 | 404.1917 <sup>+2</sup> | b <sub>6</sub> <sup>+2</sup>                                 | 607.2899 <sup>+2</sup> | b <sub>10</sub> <sup>+2</sup>                                 | 790.9308 <sup>+2</sup> | MH-H <sub>3</sub> PO <sub>4</sub> <sup>+2</sup>               | 1287.6804 | b <sub>12</sub> -H <sub>3</sub> PO <sub>4</sub> |
| 219.0990 <sup>+2</sup> | b <sub>3</sub> <sup>+2</sup>                                 | 436.7349 <sup>+2</sup> | y <sub>8</sub> <sup>+2</sup>                                 | 608.8253 <sup>+2</sup> | b <sub>11</sub> -H <sub>3</sub> PO <sub>4</sub> <sup>+2</sup> | 801.4254               | y <sub>7</sub>                                                | 1311.6692 | y <sub>12</sub> -H <sub>3</sub> PO <sub>4</sub> |
| 233.6366 <sup>+2</sup> | y <sub>4</sub> <sup>+2</sup>                                 | 437.1908               | b <sub>3</sub>                                               | 621.8275 <sup>+2</sup> | y <sub>11</sub> <sup>+2</sup>                                 | 807.376                | b <sub>6</sub>                                                | 1314.6202 | b <sub>11</sub>                                 |
| 234.6319 <sup>+2</sup> | b <sub>4</sub> -H <sub>3</sub> PO <sub>4</sub> <sup>+2</sup> | 439.7102 <sup>+2</sup> | b <sub>7</sub> <sup>+2</sup>                                 | 644.3438 <sup>+2</sup> | b <sub>12</sub> -H <sub>3</sub> PO <sub>4</sub> <sup>+2</sup> | 839.9193 <sup>+2</sup> | MH <sup>+2</sup>                                              | 1385.6573 | b <sub>12</sub>                                 |
| 270.1925               | b <sub>2</sub>                                               | 459.2512 <sup>+2</sup> | b <sub>8</sub> -H <sub>3</sub> PO <sub>4</sub> <sup>+2</sup> | 656.3382 <sup>+2</sup> | y <sub>12</sub> -H <sub>3</sub> PO <sub>4</sub> <sup>+2</sup> | 872.4625               | y <sub>8</sub>                                                | 1409.6461 | y <sub>12</sub>                                 |
| 282.1630 <sup>+2</sup> | y <sub>5</sub> <sup>+2</sup>                                 | 466.266                | y <sub>4</sub>                                               | 657.8137 <sup>+2</sup> | b <sub>11</sub> <sup>+2</sup>                                 | 878.4132               | b <sub>7</sub>                                                | 1424.7532 | y <sub>13</sub> -H <sub>3</sub> PO <sub>4</sub> |
| 283.6203 <sup>+2</sup> | b <sub>4</sub> <sup>+2</sup>                                 | 468.2565               | b <sub>4</sub> -H <sub>3</sub> PO <sub>4</sub>               | 664.3665               | y <sub>6</sub>                                                | 917.4952               | b <sub>8</sub> -H <sub>3</sub> PO <sub>4</sub>                | 1434.7488 | b <sub>13</sub> -H <sub>3</sub> PO <sub>4</sub> |
| 294.1812               | y <sub>2</sub>                                               | 493.2769 <sup>+2</sup> | y <sub>9</sub> <sup>+2</sup>                                 | 693.3323 <sup>+2</sup> | b <sub>12</sub> <sup>+2</sup>                                 | 985.5465               | y <sub>9</sub>                                                | 1522.7301 | y <sub>13</sub>                                 |
| 298.6612 <sup>+2</sup> | b <sub>5</sub> -H <sub>3</sub> PO <sub>4</sub> <sup>+2</sup> | 508.2397 <sup>+2</sup> | b <sub>8</sub> <sup>+2</sup>                                 | 694.292                | b <sub>5</sub>                                                | 1015.4721              | b <sub>8</sub>                                                | 1532.7257 | b <sub>13</sub>                                 |
| 332.6869 <sup>+2</sup> | y <sub>6</sub> <sup>+2</sup>                                 | 509.7751 <sup>+2</sup> | b <sub>9</sub> -H <sub>3</sub> PO <sub>4</sub> <sup>+2</sup> | 705.3267 <sup>+2</sup> | y <sub>12</sub> <sup>+2</sup>                                 | 1018.5429              | b <sub>9</sub> -H <sub>3</sub> PO <sub>4</sub>                | 1580.8544 | MH-H <sub>3</sub> PO <sub>4</sub>               |
| 339.2139               | b <sub>3</sub> -H <sub>3</sub> PO <sub>4</sub>               | 557.3062 <sup>+2</sup> | y <sub>10</sub> <sup>+2</sup>                                | 709.3991               | b <sub>6</sub> -H <sub>3</sub> PO <sub>4</sub>                | 1113.6051              | y <sub>10</sub>                                               | 1678.8312 | MH                                              |



MS/MS Fragmentation of TAsNPKVENEDEPVR  
 Found in IPI00165547, Isoform 2 of Phosphatidylinositol 4-kinase beta

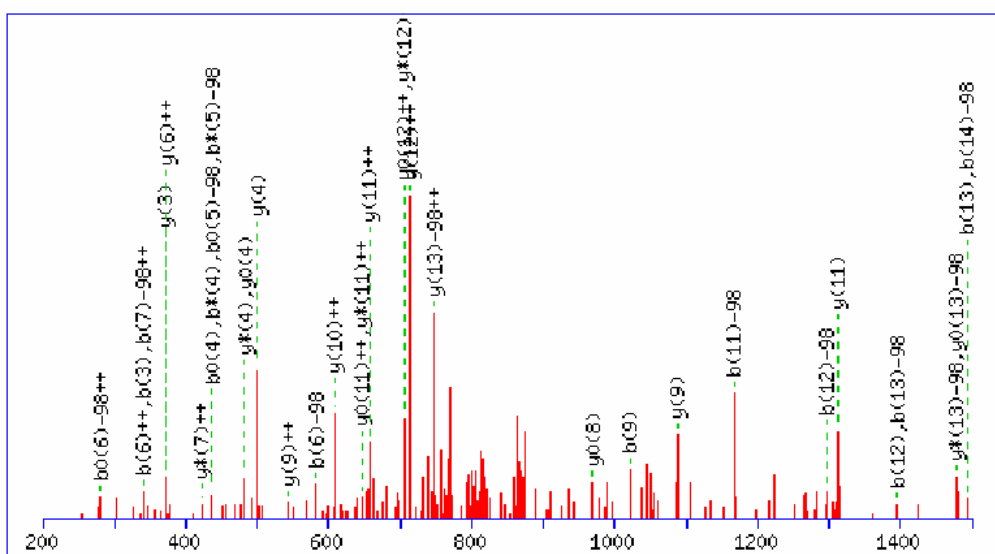

|                        |                                                              |                        |                                                               |                        |                                                               |                        |                                                 |           |                                                 |
|------------------------|--------------------------------------------------------------|------------------------|---------------------------------------------------------------|------------------------|---------------------------------------------------------------|------------------------|-------------------------------------------------|-----------|-------------------------------------------------|
| 88.0631 <sup>+2</sup>  | y <sub>1</sub> <sup>+2</sup>                                 | 389.6784 <sup>+2</sup> | b <sub>7</sub> <sup>+2</sup>                                  | 607.8042 <sup>+2</sup> | y <sub>10</sub> <sup>+2</sup>                                 | 795.8378 <sup>+2</sup> | b <sub>14</sub> <sup>+2</sup>                   | 1265.5046 | b <sub>11</sub>                                 |
| 137.5973 <sup>+2</sup> | y <sub>2</sub> <sup>+2</sup>                                 | 405.2112 <sup>+2</sup> | b <sub>8</sub> -H <sub>3</sub> PO <sub>4</sub> <sup>+2</sup>  | 615.3097               | y <sub>5</sub>                                                | 796.8512 <sup>+2</sup> | y <sub>13</sub> <sup>+2</sup>                   | 1296.5703 | b <sub>12</sub> -H <sub>3</sub> PO <sub>4</sub> |
| 173.0921               | b <sub>2</sub>                                               | 429.7012 <sup>+2</sup> | y <sub>7</sub> <sup>+2</sup>                                  | 633.2559 <sup>+2</sup> | b <sub>11</sub> <sup>+2</sup>                                 | 809.4152               | b <sub>8</sub> -H <sub>3</sub> PO <sub>4</sub>  | 1311.6539 | y <sub>11</sub>                                 |
| 175.119                | y <sub>1</sub>                                               | 453.2092               | b <sub>5</sub> -H <sub>3</sub> PO <sub>4</sub>                | 648.7888 <sup>+2</sup> | b <sub>12</sub> -H <sub>3</sub> PO <sub>4</sub> <sup>+2</sup> | 832.3698 <sup>+2</sup> | y <sub>14</sub> <sup>+2</sup>                   | 1393.623  | b <sub>13</sub> -H <sub>3</sub> PO <sub>4</sub> |
| 186.1237 <sup>+2</sup> | y <sub>3</sub> <sup>+2</sup>                                 | 454.1334               | b <sub>4</sub>                                                | 656.3306 <sup>+2</sup> | y <sub>11</sub> <sup>+2</sup>                                 | 833.9052 <sup>+2</sup> | MH-H <sub>3</sub> PO <sub>4</sub> <sup>+2</sup> | 1394.5471 | b <sub>12</sub>                                 |
| 242.1135               | b <sub>3</sub> -H <sub>3</sub> PO <sub>4</sub>               | 454.1997 <sup>+2</sup> | b <sub>8</sub> <sup>+2</sup>                                  | 679.2811               | b <sub>6</sub>                                                | 858.3952               | y <sub>7</sub>                                  | 1425.6968 | y <sub>12</sub>                                 |
| 250.6450 <sup>+2</sup> | y <sub>4</sub> <sup>+2</sup>                                 | 462.2327 <sup>+2</sup> | b <sub>9</sub> -H <sub>3</sub> PO <sub>4</sub> <sup>+2</sup>  | 680.3726               | b <sub>7</sub> -H <sub>3</sub> PO <sub>4</sub>                | 882.8936 <sup>+2</sup> | MH <sup>+2</sup>                                | 1491.5999 | b <sub>13</sub>                                 |
| 274.1874               | y <sub>2</sub>                                               | 494.2225 <sup>+2</sup> | y <sub>8</sub> <sup>+2</sup>                                  | 697.3151 <sup>+2</sup> | b <sub>13</sub> -H <sub>3</sub> PO <sub>4</sub> <sup>+2</sup> | 907.3921               | b <sub>8</sub>                                  | 1492.6914 | b <sub>14</sub> -H <sub>3</sub> PO <sub>4</sub> |
| 291.1557 <sup>+2</sup> | b <sub>6</sub> -H <sub>3</sub> PO <sub>4</sub> <sup>+2</sup> | 500.2827               | y <sub>4</sub>                                                | 697.7772 <sup>+2</sup> | b <sub>12</sub> <sup>+2</sup>                                 | 923.4581               | b <sub>9</sub> -H <sub>3</sub> PO <sub>4</sub>  | 1494.7183 | y <sub>13</sub> -H <sub>3</sub> PO <sub>4</sub> |
| 308.1585 <sup>+2</sup> | y <sub>5</sub> <sup>+2</sup>                                 | 511.2211 <sup>+2</sup> | b <sub>9</sub> <sup>+2</sup>                                  | 713.3521 <sup>+2</sup> | y <sub>12</sub> <sup>+2</sup>                                 | 987.4378               | y <sub>8</sub>                                  | 1565.7554 | y <sub>14</sub> -H <sub>3</sub> PO <sub>4</sub> |
| 340.0904               | b <sub>3</sub>                                               | 526.7540 <sup>+2</sup> | b <sub>10</sub> -H <sub>3</sub> PO <sub>4</sub> <sup>+2</sup> | 744.3523               | y <sub>6</sub>                                                | 1021.435               | b <sub>9</sub>                                  | 1590.6683 | b <sub>14</sub>                                 |
| 340.1442 <sup>+2</sup> | b <sub>6</sub> <sup>+2</sup>                                 | 543.7567 <sup>+2</sup> | y <sub>9</sub> <sup>+2</sup>                                  | 746.3036 <sup>+2</sup> | b <sub>13</sub> <sup>+2</sup>                                 | 1052.5007              | b <sub>10</sub> -H <sub>3</sub> PO <sub>4</sub> | 1592.6952 | y <sub>13</sub>                                 |
| 340.6899 <sup>+2</sup> | b <sub>7</sub> -H <sub>3</sub> PO <sub>4</sub> <sup>+2</sup> | 551.1861               | b <sub>5</sub>                                                | 746.8494 <sup>+2</sup> | b <sub>14</sub> -H <sub>3</sub> PO <sub>4</sub> <sup>+2</sup> | 1086.5062              | y <sub>9</sub>                                  | 1663.7323 | y <sub>14</sub>                                 |
| 356.1565               | b <sub>4</sub> -H <sub>3</sub> PO <sub>4</sub>               | 575.7424 <sup>+2</sup> | b <sub>10</sub> <sup>+2</sup>                                 | 747.8628 <sup>+2</sup> | y <sub>13</sub> -H <sub>3</sub> PO <sub>4</sub> <sup>+2</sup> | 1150.4776              | b <sub>10</sub>                                 | 1666.8031 | MH-H <sub>3</sub> PO <sub>4</sub>               |
| 371.2401               | y <sub>3</sub>                                               | 581.3042               | b <sub>6</sub> -H <sub>3</sub> PO <sub>4</sub>                | 778.3495               | b <sub>7</sub>                                                | 1167.5277              | b <sub>11</sub> -H <sub>3</sub> PO <sub>4</sub> | 1764.78   | MH                                              |
| 372.6798 <sup>+2</sup> | y <sub>6</sub> <sup>+2</sup>                                 | 584.2675 <sup>+2</sup> | b <sub>11</sub> -H <sub>3</sub> PO <sub>4</sub> <sup>+2</sup> | 783.3814 <sup>+2</sup> | y <sub>14</sub> -H <sub>3</sub> PO <sub>4</sub> <sup>+2</sup> | 1214.6012              | y <sub>10</sub>                                 |           |                                                 |

MS/MS Fragmentation of sVENLPECGITHEQR  
 Found in IPI00165547, Isoform 2 of Phosphatidylinositol 4-kinase beta

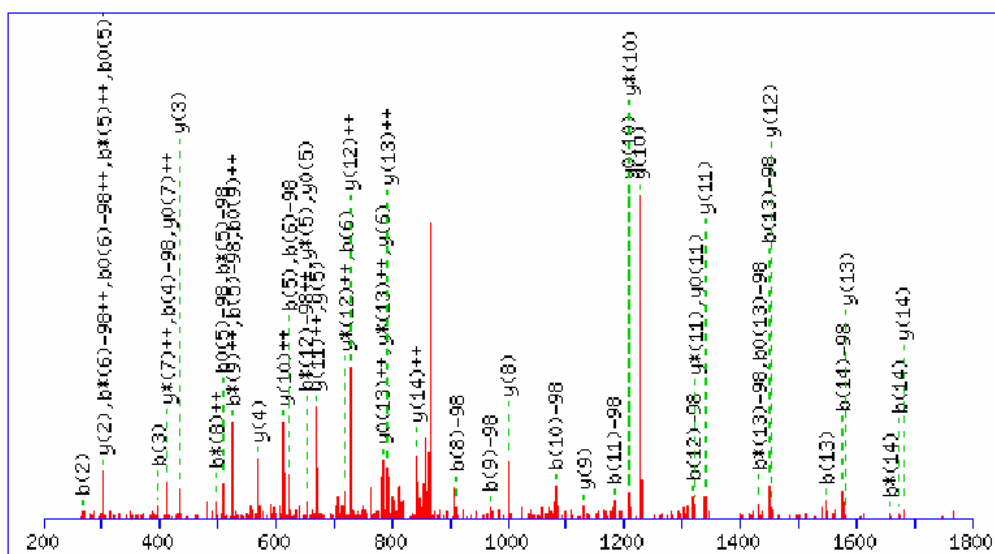

|                        |                                                |                        |                                                               |                        |                                                               |                        |                                                 |           |                                                 |
|------------------------|------------------------------------------------|------------------------|---------------------------------------------------------------|------------------------|---------------------------------------------------------------|------------------------|-------------------------------------------------|-----------|-------------------------------------------------|
| 88.0631 <sup>+2</sup>  | y <sub>1</sub> <sup>+2</sup>                   | 420.7198 <sup>+2</sup> | y <sub>7</sub> <sup>+2</sup>                                  | 680.7838 <sup>+2</sup> | b <sub>12</sub> <sup>+2</sup>                                 | 849.339                | b <sub>7</sub>                                  | 1262.5834 | b <sub>12</sub> -H <sub>3</sub> PO <sub>4</sub> |
| 152.0924 <sup>+2</sup> | y <sub>2</sub> <sup>+2</sup>                   | 432.2201               | y <sub>3</sub>                                                | 696.3166 <sup>+2</sup> | b <sub>13</sub> -H <sub>3</sub> PO <sub>4</sub> <sup>+2</sup> | 854.3713               | b <sub>8</sub> -H <sub>3</sub> PO <sub>4</sub>  | 1282.6208 | y <sub>11</sub>                                 |
| 169.0972               | b <sub>2</sub> -H <sub>3</sub> PO <sub>4</sub> | 472.2244 <sup>+2</sup> | y <sub>8</sub> <sup>+2</sup>                                  | 698.8355 <sup>+2</sup> | y <sub>12</sub> <sup>+2</sup>                                 | 896.3902 <sup>+2</sup> | MH <sup>+2</sup>                                | 1360.5603 | b <sub>12</sub>                                 |
| 175.119                | y <sub>1</sub>                                 | 510.1596               | b <sub>4</sub>                                                | 720.2964               | b <sub>6</sub>                                                | 911.3927               | b <sub>9</sub> -H <sub>3</sub> PO <sub>4</sub>  | 1391.626  | b <sub>13</sub> -H <sub>3</sub> PO <sub>4</sub> |
| 216.6137 <sup>+2</sup> | y <sub>3</sub> <sup>+2</sup>                   | 525.2667               | b <sub>5</sub> -H <sub>3</sub> PO <sub>4</sub>                | 745.3051 <sup>+2</sup> | b <sub>13</sub> <sup>+2</sup>                                 | 943.4414               | y <sub>8</sub>                                  | 1396.6638 | y <sub>12</sub>                                 |
| 267.074                | b <sub>2</sub>                                 | 536.7456 <sup>+2</sup> | y <sub>9</sub> <sup>+2</sup>                                  | 751.3621               | b <sub>7</sub> -H <sub>3</sub> PO <sub>4</sub>                | 952.3482               | b <sub>8</sub>                                  | 1489.6029 | b <sub>13</sub>                                 |
| 285.1432 <sup>+2</sup> | y <sub>4</sub> <sup>+2</sup>                   | 569.279                | y <sub>4</sub>                                                | 760.3459 <sup>+2</sup> | b <sub>14</sub> -H <sub>3</sub> PO <sub>4</sub> <sup>+2</sup> | 1009.3696              | b <sub>9</sub>                                  | 1519.6846 | b <sub>14</sub> -H <sub>3</sub> PO <sub>4</sub> |
| 298.1397               | b <sub>3</sub> -H <sub>3</sub> PO <sub>4</sub> | 585.2720 <sup>+2</sup> | y <sub>10</sub> <sup>+2</sup>                                 | 763.3568 <sup>+2</sup> | y <sub>13</sub> <sup>+2</sup>                                 | 1024.4768              | b <sub>10</sub> -H <sub>3</sub> PO <sub>4</sub> | 1525.7064 | y <sub>13</sub>                                 |
| 303.1775               | y <sub>2</sub>                                 | 622.3195               | b <sub>6</sub> -H <sub>3</sub> PO <sub>4</sub>                | 783.4108               | y <sub>6</sub>                                                | 1072.484               | y <sub>9</sub>                                  | 1617.6615 | b <sub>14</sub>                                 |
| 335.6670 <sup>+2</sup> | y <sub>5</sub> <sup>+2</sup>                   | 623.2436               | b <sub>5</sub>                                                | 809.3344 <sup>+2</sup> | b <sub>14</sub> <sup>+2</sup>                                 | 1122.4537              | b <sub>10</sub>                                 | 1624.7748 | y <sub>14</sub>                                 |
| 392.2090 <sup>+2</sup> | y <sub>6</sub> <sup>+2</sup>                   | 631.7953 <sup>+2</sup> | b <sub>12</sub> -H <sub>3</sub> PO <sub>4</sub> <sup>+2</sup> | 812.8910 <sup>+2</sup> | y <sub>14</sub> <sup>+2</sup>                                 | 1125.5245              | b <sub>11</sub> -H <sub>3</sub> PO <sub>4</sub> | 1693.7962 | MH-H <sub>3</sub> PO <sub>4</sub>               |
| 396.1166               | b <sub>3</sub>                                 | 641.8141 <sup>+2</sup> | y <sub>11</sub> <sup>+2</sup>                                 | 840.4322               | y <sub>7</sub>                                                | 1169.5368              | y <sub>10</sub>                                 | 1791.7731 | MH                                              |
| 412.1827               | b <sub>4</sub> -H <sub>3</sub> PO <sub>4</sub> | 670.3267               | y <sub>5</sub>                                                | 847.4018 <sup>+2</sup> | MH-H <sub>3</sub> PO <sub>4</sub> <sup>+2</sup>               | 1223.5014              | b <sub>11</sub>                                 |           |                                                 |

MS/MS Fragmentation of STRsVENLPECGITHEQR  
 Found in IPI00165547, Isoform 2 of Phosphatidylinositol 4-kinase beta

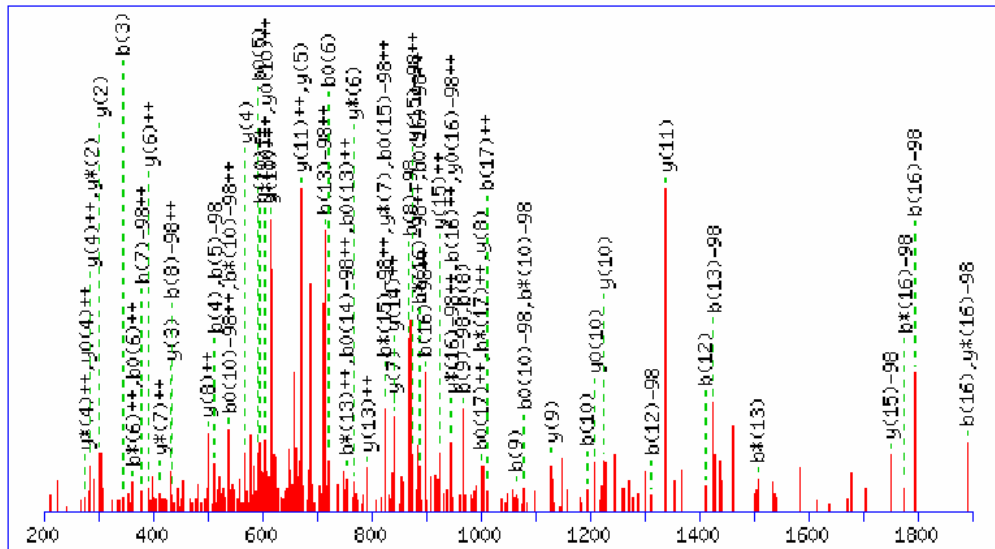

|                        |                                                              |                        |                                                               |                        |                                                               |                         |                                                               |           |                                                 |
|------------------------|--------------------------------------------------------------|------------------------|---------------------------------------------------------------|------------------------|---------------------------------------------------------------|-------------------------|---------------------------------------------------------------|-----------|-------------------------------------------------|
| 88.0631 <sup>+2</sup>  | y <sub>1</sub> <sup>+2</sup>                                 | 432.2201               | y <sub>3</sub>                                                | 684.8325 <sup>+2</sup> | b <sub>13</sub> -H <sub>3</sub> PO <sub>4</sub> <sup>+2</sup> | 943.4414                | y <sub>8</sub>                                                | 1466.6345 | b <sub>13</sub>                                 |
| 152.0924 <sup>+2</sup> | y <sub>2</sub> <sup>+2</sup>                                 | 435.2274 <sup>+2</sup> | b <sub>8</sub> -H <sub>3</sub> PO <sub>4</sub> <sup>+2</sup>  | 698.8355 <sup>+2</sup> | y <sub>12</sub> <sup>+2</sup>                                 | 966.5003                | b <sub>9</sub> -H <sub>3</sub> PO <sub>4</sub>                | 1469.7053 | b <sub>14</sub> -H <sub>3</sub> PO <sub>4</sub> |
| 173.0977 <sup>+2</sup> | b <sub>3</sub> <sup>+2</sup>                                 | 472.2244 <sup>+2</sup> | y <sub>8</sub> <sup>+2</sup>                                  | 733.8209 <sup>+2</sup> | b <sub>13</sub> <sup>+2</sup>                                 | 967.4245                | b <sub>8</sub>                                                | 1525.7064 | y <sub>13</sub>                                 |
| 175.119                | y <sub>1</sub>                                               | 483.7538 <sup>+2</sup> | b <sub>9</sub> -H <sub>3</sub> PO <sub>4</sub> <sup>+2</sup>  | 735.3563 <sup>+2</sup> | b <sub>14</sub> -H <sub>3</sub> PO <sub>4</sub> <sup>+2</sup> | 974.4408 <sup>+2</sup>  | y <sub>16</sub> <sup>+2</sup>                                 | 1567.6822 | b <sub>14</sub>                                 |
| 189.087                | b <sub>2</sub>                                               | 484.2159 <sup>+2</sup> | b <sub>8</sub> <sup>+2</sup>                                  | 740.2975               | b <sub>6</sub>                                                | 975.9762 <sup>+2</sup>  | y <sub>17</sub> -H <sub>3</sub> PO <sub>4</sub> <sup>+2</sup> | 1606.7642 | b <sub>15</sub> -H <sub>3</sub> PO <sub>4</sub> |
| 207.6084 <sup>+2</sup> | b <sub>4</sub> -H <sub>3</sub> PO <sub>4</sub> <sup>+2</sup> | 512.1865               | b <sub>4</sub>                                                | 756.3635               | b <sub>7</sub> -H <sub>3</sub> PO <sub>4</sub>                | 981.4248 <sup>+2</sup>  | b <sub>17</sub> <sup>+2</sup>                                 | 1624.7748 | y <sub>14</sub>                                 |
| 216.6137 <sup>+2</sup> | y <sub>3</sub> <sup>+2</sup>                                 | 513.278                | b <sub>5</sub> -H <sub>3</sub> PO <sub>4</sub>                | 763.3568 <sup>+2</sup> | y <sub>13</sub> <sup>+2</sup>                                 | 1019.4922 <sup>+2</sup> | MH-H <sub>3</sub> PO <sub>4</sub> <sup>+2</sup>               | 1693.7962 | y <sub>15</sub> -H <sub>3</sub> PO <sub>4</sub> |
| 256.5969 <sup>+2</sup> | b <sub>4</sub> <sup>+2</sup>                                 | 532.7422 <sup>+2</sup> | b <sub>9</sub> <sup>+2</sup>                                  | 783.4108               | y <sub>6</sub>                                                | 1024.9646 <sup>+2</sup> | y <sub>17</sub> <sup>+2</sup>                                 | 1704.7411 | b <sub>15</sub>                                 |
| 257.1426 <sup>+2</sup> | b <sub>5</sub> -H <sub>3</sub> PO <sub>4</sub> <sup>+2</sup> | 536.7456 <sup>+2</sup> | y <sub>9</sub> <sup>+2</sup>                                  | 784.3447 <sup>+2</sup> | b <sub>14</sub> <sup>+2</sup>                                 | 1064.4772               | b <sub>9</sub>                                                | 1735.8068 | b <sub>16</sub> -H <sub>3</sub> PO <sub>4</sub> |
| 285.1432 <sup>+2</sup> | y <sub>4</sub> <sup>+2</sup>                                 | 548.2751 <sup>+2</sup> | b <sub>10</sub> -H <sub>3</sub> PO <sub>4</sub> <sup>+2</sup> | 803.8857 <sup>+2</sup> | b <sub>15</sub> -H <sub>3</sub> PO <sub>4</sub> <sup>+2</sup> | 1068.4806 <sup>+2</sup> | MH <sup>+2</sup>                                              | 1791.7731 | y <sub>15</sub>                                 |
| 303.1775               | y <sub>2</sub>                                               | 569.279                | y <sub>4</sub>                                                | 812.8910 <sup>+2</sup> | y <sub>14</sub> <sup>+2</sup>                                 | 1072.484                | y <sub>9</sub>                                                | 1833.7837 | b <sub>16</sub>                                 |
| 306.1311 <sup>+2</sup> | b <sub>5</sub> <sup>+2</sup>                                 | 585.2720 <sup>+2</sup> | y <sub>10</sub> <sup>+2</sup>                                 | 840.4322               | y <sub>7</sub>                                                | 1095.5429               | b <sub>10</sub> -H <sub>3</sub> PO <sub>4</sub>               | 1849.8974 | y <sub>16</sub> -H <sub>3</sub> PO <sub>4</sub> |
| 321.6639 <sup>+2</sup> | b <sub>6</sub> -H <sub>3</sub> PO <sub>4</sub> <sup>+2</sup> | 597.2635 <sup>+2</sup> | b <sub>10</sub> <sup>+2</sup>                                 | 847.4018 <sup>+2</sup> | y <sub>15</sub> -H <sub>3</sub> PO <sub>4</sub> <sup>+2</sup> | 1169.5368               | y <sub>10</sub>                                               | 1863.8654 | b <sub>17</sub> -H <sub>3</sub> PO <sub>4</sub> |
| 335.6670 <sup>+2</sup> | y <sub>5</sub> <sup>+2</sup>                                 | 599.7797 <sup>+2</sup> | b <sub>11</sub> -H <sub>3</sub> PO <sub>4</sub> <sup>+2</sup> | 852.8742 <sup>+2</sup> | b <sub>15</sub> <sup>+2</sup>                                 | 1193.5198               | b <sub>10</sub>                                               | 1947.8743 | y <sub>16</sub>                                 |
| 345.1881               | b <sub>3</sub>                                               | 611.2549               | b <sub>5</sub>                                                | 854.3404               | b <sub>7</sub>                                                | 1198.5521               | b <sub>11</sub> -H <sub>3</sub> PO <sub>4</sub>               | 1950.945  | y <sub>17</sub> -H <sub>3</sub> PO <sub>4</sub> |
| 370.6524 <sup>+2</sup> | b <sub>6</sub> <sup>+2</sup>                                 | 628.2904 <sup>+2</sup> | b <sub>12</sub> -H <sub>3</sub> PO <sub>4</sub> <sup>+2</sup> | 868.4070 <sup>+2</sup> | b <sub>16</sub> -H <sub>3</sub> PO <sub>4</sub> <sup>+2</sup> | 1255.5736               | b <sub>12</sub> -H <sub>3</sub> PO <sub>4</sub>               | 1961.8423 | b <sub>17</sub>                                 |
| 378.6854 <sup>+2</sup> | b <sub>7</sub> -H <sub>3</sub> PO <sub>4</sub> <sup>+2</sup> | 641.8141 <sup>+2</sup> | y <sub>11</sub> <sup>+2</sup>                                 | 869.4476               | b <sub>8</sub> -H <sub>3</sub> PO <sub>4</sub>                | 1282.6208               | y <sub>11</sub>                                               | 2037.9771 | MH-H <sub>3</sub> PO <sub>4</sub>               |
| 392.2090 <sup>+2</sup> | y <sub>6</sub> <sup>+2</sup>                                 | 642.3206               | b <sub>6</sub> -H <sub>3</sub> PO <sub>4</sub>                | 896.3902 <sup>+2</sup> | y <sub>15</sub> <sup>+2</sup>                                 | 1296.529                | b <sub>11</sub>                                               | 2048.9219 | y <sub>17</sub>                                 |
| 414.2096               | b <sub>4</sub> -H <sub>3</sub> PO <sub>4</sub>               | 648.7681 <sup>+2</sup> | b <sub>11</sub> <sup>+2</sup>                                 | 917.3955 <sup>+2</sup> | b <sub>16</sub> <sup>+2</sup>                                 | 1353.5505               | b <sub>12</sub>                                               | 2135.954  | MH                                              |
| 420.7198 <sup>+2</sup> | y <sub>7</sub> <sup>+2</sup>                                 | 670.3267               | y <sub>5</sub>                                                | 925.4523 <sup>+2</sup> | y <sub>16</sub> -H <sub>3</sub> PO <sub>4</sub> <sup>+2</sup> | 1368.6576               | b <sub>13</sub> -H <sub>3</sub> PO <sub>4</sub>               |           |                                                 |
| 427.6738 <sup>+2</sup> | b <sub>7</sub> <sup>+2</sup>                                 | 677.2789 <sup>+2</sup> | b <sub>12</sub> <sup>+2</sup>                                 | 932.4363 <sup>+2</sup> | b <sub>17</sub> -H <sub>3</sub> PO <sub>4</sub> <sup>+2</sup> | 1396.6638               | y <sub>12</sub>                                               |           |                                                 |

MS/MS Fragmentation of MIGFPSSAGSVsPR  
 Found in IPI00009866, Isoform 1 of Keratin, type I cytoskeletal 13

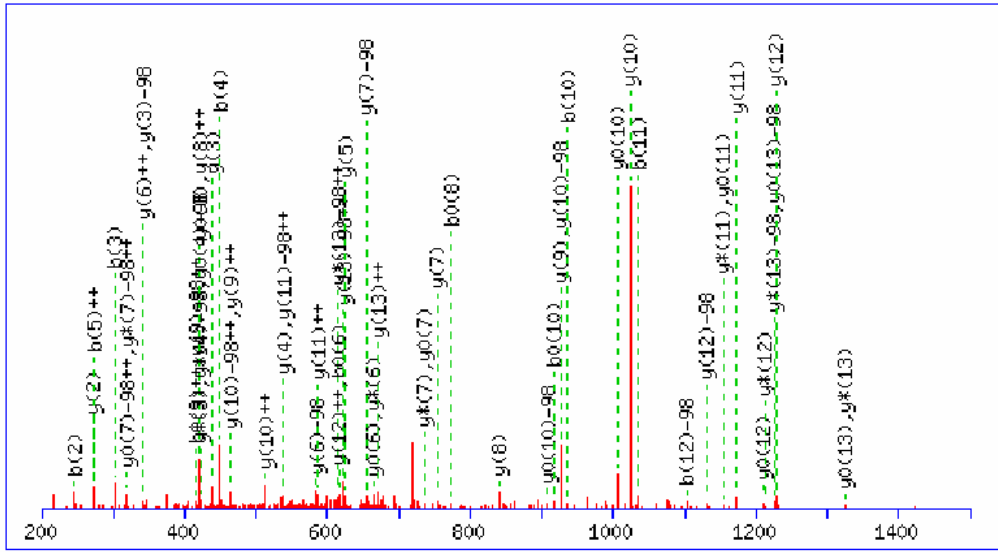

|                        |                                                              |                        |                                                               |                        |                                                               |                        |                                                 |           |                                                 |
|------------------------|--------------------------------------------------------------|------------------------|---------------------------------------------------------------|------------------------|---------------------------------------------------------------|------------------------|-------------------------------------------------|-----------|-------------------------------------------------|
| 88.0631 <sup>+2</sup>  | y <sub>1</sub> <sup>+2</sup>                                 | 341.1932               | y <sub>3</sub> -H <sub>3</sub> PO <sub>4</sub>                | 538.2385               | y <sub>4</sub>                                                | 736.8338 <sup>+2</sup> | MH <sup>+2</sup>                                | 1130.5589 | y <sub>12</sub> -H <sub>3</sub> PO <sub>4</sub> |
| 136.5895 <sup>+2</sup> | y <sub>2</sub> <sup>+2</sup>                                 | 341.6496 <sup>+2</sup> | y <sub>6</sub> <sup>+2</sup>                                  | 546.2745               | b <sub>5</sub>                                                | 742.3842               | y <sub>8</sub> -H <sub>3</sub> PO <sub>4</sub>  | 1171.5143 | y <sub>11</sub>                                 |
| 171.1002 <sup>+2</sup> | y <sub>3</sub> -H <sub>3</sub> PO <sub>4</sub> <sup>+2</sup> | 371.6958 <sup>+2</sup> | y <sub>8</sub> -H <sub>3</sub> PO <sub>4</sub> <sup>+2</sup>  | 565.7831 <sup>+2</sup> | y <sub>12</sub> -H <sub>3</sub> PO <sub>4</sub> <sup>+2</sup> | 753.3291               | y <sub>7</sub>                                  | 1200.5718 | b <sub>13</sub> -H <sub>3</sub> PO <sub>4</sub> |
| 175.119                | y <sub>1</sub>                                               | 377.1682 <sup>+2</sup> | y <sub>7</sub> <sup>+2</sup>                                  | 584.3151               | y <sub>6</sub> -H <sub>3</sub> PO <sub>4</sub>                | 791.3756               | b <sub>8</sub>                                  | 1201.4959 | b <sub>12</sub>                                 |
| 220.0887 <sup>+2</sup> | y <sub>3</sub> <sup>+2</sup>                                 | 415.2118 <sup>+2</sup> | y <sub>9</sub> -H <sub>3</sub> PO <sub>4</sub> <sup>+2</sup>  | 586.2608 <sup>+2</sup> | y <sub>11</sub> <sup>+2</sup>                                 | 829.4163               | y <sub>9</sub> -H <sub>3</sub> PO <sub>4</sub>  | 1228.5358 | y <sub>12</sub>                                 |
| 220.6344 <sup>+2</sup> | y <sub>4</sub> -H <sub>3</sub> PO <sub>4</sub> <sup>+2</sup> | 420.6842 <sup>+2</sup> | y <sub>8</sub> <sup>+2</sup>                                  | 614.7715 <sup>+2</sup> | y <sub>12</sub> <sup>+2</sup>                                 | 840.3611               | y <sub>8</sub>                                  | 1243.643  | y <sub>13</sub> -H <sub>3</sub> PO <sub>4</sub> |
| 245.1318               | b <sub>2</sub>                                               | 439.1701               | y <sub>3</sub>                                                | 622.3251 <sup>+2</sup> | y <sub>13</sub> -H <sub>3</sub> PO <sub>4</sub> <sup>+2</sup> | 848.3971               | b <sub>9</sub>                                  | 1298.5487 | b <sub>13</sub>                                 |
| 264.1504 <sup>+2</sup> | y <sub>5</sub> -H <sub>3</sub> PO <sub>4</sub> <sup>+2</sup> | 440.2616               | y <sub>4</sub> -H <sub>3</sub> PO <sub>4</sub>                | 625.2705               | y <sub>5</sub>                                                | 926.469                | y <sub>10</sub> -H <sub>3</sub> PO <sub>4</sub> | 1341.6199 | y <sub>13</sub>                                 |
| 269.6229 <sup>+2</sup> | y <sub>4</sub> <sup>+2</sup>                                 | 449.2217               | b <sub>4</sub>                                                | 633.3065               | b <sub>6</sub>                                                | 927.3932               | y <sub>9</sub>                                  | 1374.6834 | MH-H <sub>3</sub> PO <sub>4</sub>               |
| 272.1717               | y <sub>2</sub>                                               | 463.7381 <sup>+2</sup> | y <sub>10</sub> -H <sub>3</sub> PO <sub>4</sub> <sup>+2</sup> | 655.3522               | y <sub>7</sub> -H <sub>3</sub> PO <sub>4</sub>                | 935.4291               | b <sub>10</sub>                                 | 1472.6603 | MH                                              |
| 292.6612 <sup>+2</sup> | y <sub>6</sub> -H <sub>3</sub> PO <sub>4</sub> <sup>+2</sup> | 464.2002 <sup>+2</sup> | y <sub>9</sub> <sup>+2</sup>                                  | 671.3136 <sup>+2</sup> | y <sub>13</sub> <sup>+2</sup>                                 | 1024.4459              | y <sub>10</sub>                                 |           |                                                 |
| 302.1533               | b <sub>3</sub>                                               | 512.7266 <sup>+2</sup> | y <sub>10</sub> <sup>+2</sup>                                 | 682.292                | y <sub>6</sub>                                                | 1034.4975              | b <sub>11</sub>                                 |           |                                                 |
| 313.1389 <sup>+2</sup> | y <sub>5</sub> <sup>+2</sup>                                 | 527.2936               | y <sub>5</sub> -H <sub>3</sub> PO <sub>4</sub>                | 687.8454 <sup>+2</sup> | MH-H <sub>3</sub> PO <sub>4</sub> <sup>+2</sup>               | 1073.5374              | y <sub>11</sub> -H <sub>3</sub> PO <sub>4</sub> |           |                                                 |
| 328.1797 <sup>+2</sup> | y <sub>7</sub> -H <sub>3</sub> PO <sub>4</sub> <sup>+2</sup> | 537.2724 <sup>+2</sup> | y <sub>11</sub> -H <sub>3</sub> PO <sub>4</sub> <sup>+2</sup> | 720.3385               | b <sub>7</sub>                                                | 1103.519               | b <sub>12</sub> -H <sub>3</sub> PO <sub>4</sub> |           |                                                 |

MS/MS Fragmentation of SLSsPTDNLELSLR  
 Found in IPI00384861, Isoform 1 of ARF GTPase-activating protein GIT1

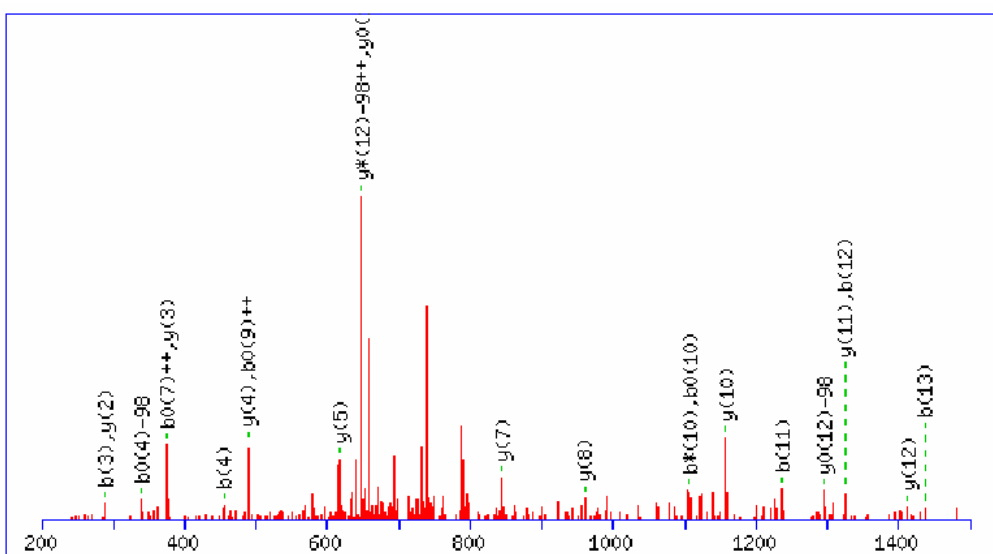

|                        |                                                |                        |                                                               |                        |                                                               |           |                                                 |           |                                                 |
|------------------------|------------------------------------------------|------------------------|---------------------------------------------------------------|------------------------|---------------------------------------------------------------|-----------|-------------------------------------------------|-----------|-------------------------------------------------|
| 88.0631 <sup>+2</sup>  | y <sub>1</sub> <sup>+2</sup>                   | 422.7480 <sup>+2</sup> | y <sub>7</sub> <sup>+2</sup>                                  | 657.3384 <sup>+2</sup> | y <sub>12</sub> -H <sub>3</sub> PO <sub>4</sub> <sup>+2</sup> | 882.3241  | b <sub>8</sub>                                  | 1313.6696 | y <sub>12</sub> -H <sub>3</sub> PO <sub>4</sub> |
| 144.6051 <sup>+2</sup> | y <sub>2</sub> <sup>+2</sup>                   | 454.2296               | b <sub>5</sub> -H <sub>3</sub> PO <sub>4</sub>                | 662.8109 <sup>+2</sup> | y <sub>11</sub> <sup>+2</sup>                                 | 897.4312  | b <sub>9</sub> -H <sub>3</sub> PO <sub>4</sub>  | 1324.5668 | b <sub>12</sub>                                 |
| 175.119                | y <sub>1</sub>                                 | 455.1538               | b <sub>4</sub>                                                | 670.3042               | b <sub>7</sub> -H <sub>3</sub> PO <sub>4</sub>                | 959.5156  | y <sub>8</sub>                                  | 1324.6144 | y <sub>11</sub>                                 |
| 188.1212 <sup>+2</sup> | y <sub>3</sub> <sup>+2</sup>                   | 480.2615 <sup>+2</sup> | y <sub>8</sub> <sup>+2</sup>                                  | 706.3269 <sup>+2</sup> | y <sub>12</sub> <sup>+2</sup>                                 | 995.4081  | b <sub>9</sub>                                  | 1339.674  | b <sub>13</sub> -H <sub>3</sub> PO <sub>4</sub> |
| 201.1234               | b <sub>2</sub>                                 | 488.3191               | y <sub>4</sub>                                                | 713.8805 <sup>+2</sup> | y <sub>13</sub> -H <sub>3</sub> PO <sub>4</sub> <sup>+2</sup> | 1026.4738 | b <sub>10</sub> -H <sub>3</sub> PO <sub>4</sub> | 1411.6465 | y <sub>12</sub>                                 |
| 244.6632 <sup>+2</sup> | y <sub>4</sub> <sup>+2</sup>                   | 530.7853 <sup>+2</sup> | y <sub>9</sub> <sup>+2</sup>                                  | 730.4458               | y <sub>6</sub>                                                | 1060.5633 | y <sub>9</sub>                                  | 1426.7536 | y <sub>13</sub> -H <sub>3</sub> PO <sub>4</sub> |
| 288.1554               | b <sub>3</sub>                                 | 552.2065               | b <sub>5</sub>                                                | 757.3965 <sup>+2</sup> | MH-H <sub>3</sub> PO <sub>4</sub> <sup>+2</sup>               | 1124.4507 | b <sub>10</sub>                                 | 1437.6509 | b <sub>13</sub>                                 |
| 288.203                | y <sub>2</sub>                                 | 555.2773               | b <sub>6</sub> -H <sub>3</sub> PO <sub>4</sub>                | 762.8689 <sup>+2</sup> | y <sub>13</sub> <sup>+2</sup>                                 | 1139.5579 | b <sub>11</sub> -H <sub>3</sub> PO <sub>4</sub> | 1513.7857 | MH-H <sub>3</sub> PO <sub>4</sub>               |
| 309.1845 <sup>+2</sup> | y <sub>5</sub> <sup>+2</sup>                   | 579.3117 <sup>+2</sup> | y <sub>10</sub> <sup>+2</sup>                                 | 768.2811               | b <sub>7</sub>                                                | 1157.6161 | y <sub>10</sub>                                 | 1524.7305 | y <sub>13</sub>                                 |
| 357.1769               | b <sub>4</sub> -H <sub>3</sub> PO <sub>4</sub> | 613.8224 <sup>+2</sup> | y <sub>11</sub> -H <sub>3</sub> PO <sub>4</sub> <sup>+2</sup> | 784.3472               | b <sub>8</sub> -H <sub>3</sub> PO <sub>4</sub>                | 1226.5899 | b <sub>12</sub> -H <sub>3</sub> PO <sub>4</sub> | 1611.7626 | MH                                              |
| 365.7265 <sup>+2</sup> | y <sub>6</sub> <sup>+2</sup>                   | 617.3617               | y <sub>5</sub>                                                | 806.3849 <sup>+2</sup> | MH <sup>+2</sup>                                              | 1226.6375 | y <sub>11</sub> -H <sub>3</sub> PO <sub>4</sub> |           |                                                 |
| 375.235                | y <sub>3</sub>                                 | 653.2542               | b <sub>6</sub>                                                | 844.4887               | y <sub>7</sub>                                                | 1237.5348 | b <sub>11</sub>                                 |           |                                                 |

MS/MS Fragmentation of SATLSGsATNLASLTAALAK  
 Found in IPI00021753, Kinesin-like protein KIF13B

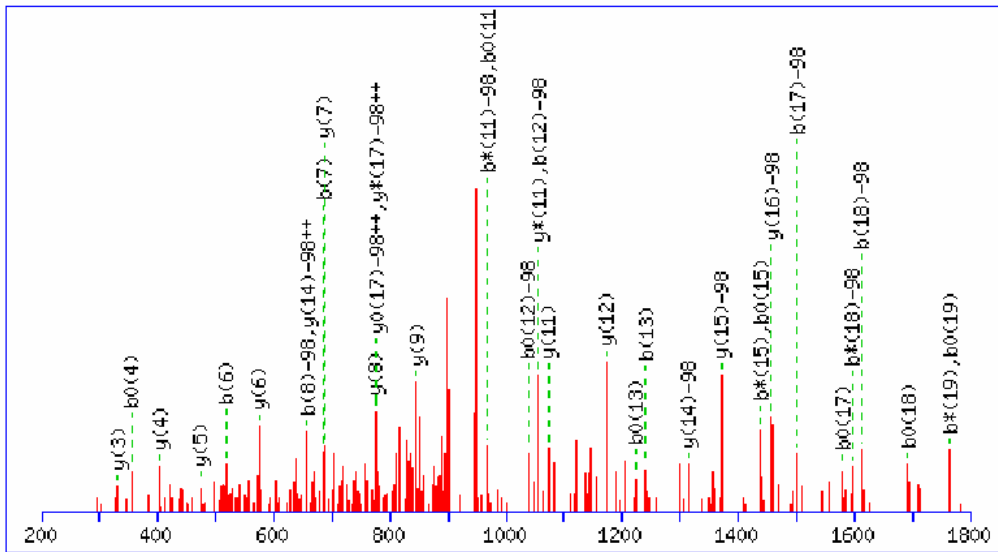

|                        |                              |                        |                                                               |                        |                                                               |           |                                                 |           |                                                 |
|------------------------|------------------------------|------------------------|---------------------------------------------------------------|------------------------|---------------------------------------------------------------|-----------|-------------------------------------------------|-----------|-------------------------------------------------|
| 74.0600 <sup>+2</sup>  | y <sub>1</sub> <sup>+2</sup> | 473.3082               | y <sub>5</sub>                                                | 758.3679               | b <sub>9</sub> -H <sub>3</sub> PO <sub>4</sub>                | 1056.532  | b <sub>12</sub> -H <sub>3</sub> PO <sub>4</sub> | 1468.7407 | y <sub>15</sub>                                 |
| 109.5786 <sup>+2</sup> | y <sub>2</sub> <sup>+2</sup> | 479.8002 <sup>+2</sup> | y <sub>10</sub> <sup>+2</sup>                                 | 774.472                | y <sub>8</sub>                                                | 1072.6361 | y <sub>11</sub>                                 | 1499.77   | b <sub>17</sub> -H <sub>3</sub> PO <sub>4</sub> |
| 147.1128               | y <sub>1</sub>               | 517.2617               | b <sub>6</sub>                                                | 778.3900 <sup>+2</sup> | y <sub>16</sub> <sup>+2</sup>                                 | 1083.4718 | b <sub>11</sub>                                 | 1526.7098 | b <sub>16</sub>                                 |
| 159.0764               | b <sub>2</sub>               | 536.8217 <sup>+2</sup> | y <sub>11</sub> <sup>+2</sup>                                 | 785.9436 <sup>+2</sup> | y <sub>17</sub> -H <sub>3</sub> PO <sub>4</sub> <sup>+2</sup> | 1143.564  | b <sub>13</sub> -H <sub>3</sub> PO <sub>4</sub> | 1555.7727 | y <sub>16</sub>                                 |
| 166.1206 <sup>+2</sup> | y <sub>3</sub> <sup>+2</sup> | 574.3559               | y <sub>6</sub>                                                | 834.9320 <sup>+2</sup> | y <sub>17</sub> <sup>+2</sup>                                 | 1154.5089 | b <sub>12</sub>                                 | 1570.8799 | y <sub>17</sub> -H <sub>3</sub> PO <sub>4</sub> |
| 201.6392 <sup>+2</sup> | y <sub>4</sub> <sup>+2</sup> | 586.2831               | b <sub>7</sub> -H <sub>3</sub> PO <sub>4</sub>                | 836.4674 <sup>+2</sup> | y <sub>18</sub> -H <sub>3</sub> PO <sub>4</sub> <sup>+2</sup> | 1173.6838 | y <sub>12</sub>                                 | 1597.7469 | b <sub>17</sub>                                 |
| 218.1499               | y <sub>2</sub>               | 587.3455 <sup>+2</sup> | y <sub>12</sub> <sup>+2</sup>                                 | 845.5091               | y <sub>9</sub>                                                | 1241.5409 | b <sub>13</sub>                                 | 1612.8541 | b <sub>18</sub> -H <sub>3</sub> PO <sub>4</sub> |
| 237.1577 <sup>+2</sup> | y <sub>5</sub> <sup>+2</sup> | 622.8641 <sup>+2</sup> | y <sub>13</sub> <sup>+2</sup>                                 | 856.3448               | b <sub>9</sub>                                                | 1244.7209 | y <sub>13</sub>                                 | 1668.8568 | y <sub>17</sub>                                 |
| 260.1241               | b <sub>3</sub>               | 657.3202               | b <sub>8</sub> -H <sub>3</sub> PO <sub>4</sub>                | 871.9860 <sup>+2</sup> | y <sub>19</sub> -H <sub>3</sub> PO <sub>4</sub> <sup>+2</sup> | 1256.6481 | b <sub>14</sub> -H <sub>3</sub> PO <sub>4</sub> | 1671.9276 | y <sub>18</sub> -H <sub>3</sub> PO <sub>4</sub> |
| 287.6816 <sup>+2</sup> | y <sub>6</sub> <sup>+2</sup> | 657.3748 <sup>+2</sup> | y <sub>14</sub> -H <sub>3</sub> PO <sub>4</sub> <sup>+2</sup> | 872.4108               | b <sub>10</sub> -H <sub>3</sub> PO <sub>4</sub>               | 1313.7423 | y <sub>14</sub> -H <sub>3</sub> PO <sub>4</sub> | 1683.8912 | b <sub>19</sub> -H <sub>3</sub> PO <sub>4</sub> |
| 331.234                | y <sub>3</sub>               | 684.26                 | b <sub>7</sub>                                                | 885.4559 <sup>+2</sup> | y <sub>18</sub> <sup>+2</sup>                                 | 1354.625  | b <sub>14</sub>                                 | 1710.831  | b <sub>18</sub>                                 |
| 344.2236 <sup>+2</sup> | y <sub>7</sub> <sup>+2</sup> | 685.8855 <sup>+2</sup> | y <sub>15</sub> -H <sub>3</sub> PO <sub>4</sub> <sup>+2</sup> | 915.5020 <sup>+2</sup> | MH-H <sub>3</sub> PO <sub>4</sub> <sup>+2</sup>               | 1357.6958 | b <sub>15</sub> -H <sub>3</sub> PO <sub>4</sub> | 1742.9647 | y <sub>19</sub> -H <sub>3</sub> PO <sub>4</sub> |
| 373.2082               | b <sub>4</sub>               | 687.44                 | y <sub>7</sub>                                                | 920.9744 <sup>+2</sup> | y <sub>19</sub> <sup>+2</sup>                                 | 1370.7638 | y <sub>15</sub> -H <sub>3</sub> PO <sub>4</sub> | 1769.9045 | y <sub>18</sub>                                 |
| 387.7396 <sup>+2</sup> | y <sub>8</sub> <sup>+2</sup> | 706.3633 <sup>+2</sup> | y <sub>14</sub> <sup>+2</sup>                                 | 958.5932               | MH                                                            | 1411.7192 | y <sub>14</sub>                                 | 1781.8681 | b <sub>19</sub>                                 |
| 402.2711               | y <sub>4</sub>               | 729.4016 <sup>+2</sup> | y <sub>16</sub> -H <sub>3</sub> PO <sub>4</sub> <sup>+2</sup> | 964.4904 <sup>+2</sup> | MH <sup>+2</sup>                                              | 1428.7329 | b <sub>16</sub> -H <sub>3</sub> PO <sub>4</sub> | 1829.9967 | MH-H <sub>3</sub> PO <sub>4</sub>               |
| 423.2582 <sup>+2</sup> | y <sub>9</sub> <sup>+2</sup> | 734.8740 <sup>+2</sup> | y <sub>15</sub> <sup>+2</sup>                                 | 970.3877               | b <sub>10</sub>                                               | 1455.6727 | b <sub>15</sub>                                 | 1840.9416 | y <sub>19</sub>                                 |
| 460.2402               | b <sub>5</sub>               | 755.2971               | b <sub>8</sub>                                                | 985.4949               | b <sub>11</sub> -H <sub>3</sub> PO <sub>4</sub>               | 1457.7958 | y <sub>16</sub> -H <sub>3</sub> PO <sub>4</sub> | 1927.9736 | MH                                              |

MS/MS Fragmentation of RSATLSGsATNLASLTAALAK  
 Found in IPI00021753, Kinesin-like protein KIF13B

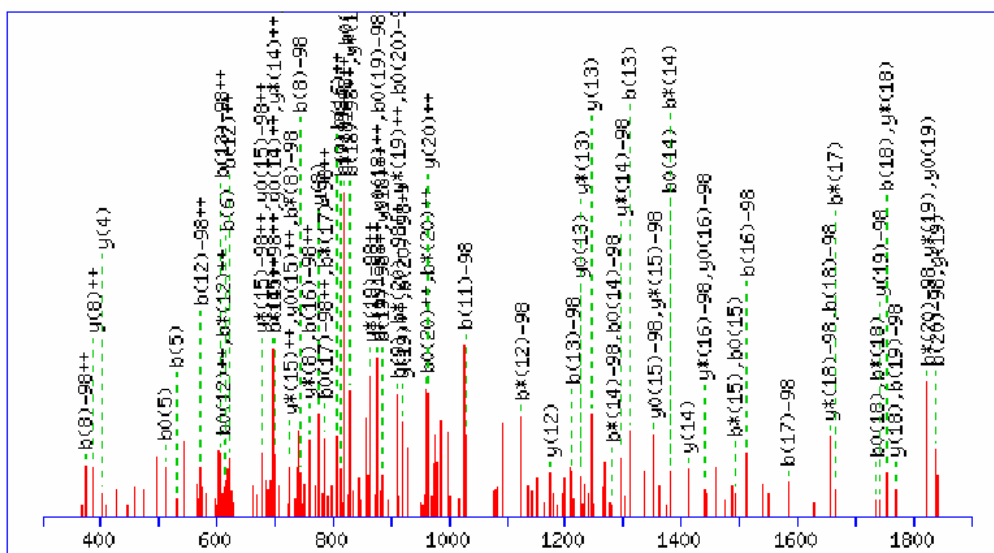

|                        |                                                              |                        |                                                               |                        |                                                               |                         |                                                 |           |                                                 |
|------------------------|--------------------------------------------------------------|------------------------|---------------------------------------------------------------|------------------------|---------------------------------------------------------------|-------------------------|-------------------------------------------------|-----------|-------------------------------------------------|
| 74.0600 <sup>+2</sup>  | y <sub>1</sub> <sup>+2</sup>                                 | 456.2028 <sup>+2</sup> | b <sub>9</sub> <sup>+2</sup>                                  | 729.4016 <sup>+2</sup> | y <sub>16</sub> -H <sub>3</sub> PO <sub>4</sub> <sup>+2</sup> | 920.9744 <sup>+2</sup>  | y <sub>19</sub> <sup>+2</sup>                   | 1510.7261 | b <sub>15</sub>                                 |
| 109.5786 <sup>+2</sup> | y <sub>2</sub> <sup>+2</sup>                                 | 457.7381 <sup>+2</sup> | b <sub>10</sub> -H <sub>3</sub> PO <sub>4</sub> <sup>+2</sup> | 734.8740 <sup>+2</sup> | y <sub>15</sub> <sup>+2</sup>                                 | 933.9697 <sup>+2</sup>  | b <sub>19</sub> <sup>+2</sup>                   | 1513.7969 | b <sub>16</sub> -H <sub>3</sub> PO <sub>4</sub> |
| 122.5738 <sup>+2</sup> | b <sub>2</sub> <sup>+2</sup>                                 | 473.3082               | y <sub>5</sub>                                                | 742.3842               | b <sub>8</sub> -H <sub>3</sub> PO <sub>4</sub>                | 958.5932                | y <sub>10</sub>                                 | 1555.7727 | y <sub>16</sub>                                 |
| 147.1128               | y <sub>1</sub>                                               | 479.8002 <sup>+2</sup> | y <sub>10</sub> <sup>+2</sup>                                 | 755.8667 <sup>+2</sup> | b <sub>15</sub> <sup>+2</sup>                                 | 964.4904 <sup>+2</sup>  | y <sub>20</sub> <sup>+2</sup>                   | 1570.8799 | y <sub>17</sub> -H <sub>3</sub> PO <sub>4</sub> |
| 158.0924 <sup>+2</sup> | b <sub>3</sub> <sup>+2</sup>                                 | 506.7266 <sup>+2</sup> | b <sub>10</sub> <sup>+2</sup>                                 | 757.4021 <sup>+2</sup> | b <sub>16</sub> -H <sub>3</sub> PO <sub>4</sub> <sup>+2</sup> | 969.4882 <sup>+2</sup>  | b <sub>20</sub> <sup>+2</sup>                   | 1584.834  | b <sub>17</sub> -H <sub>3</sub> PO <sub>4</sub> |
| 166.1206 <sup>+2</sup> | y <sub>3</sub> <sup>+2</sup>                                 | 514.7596 <sup>+2</sup> | b <sub>11</sub> -H <sub>3</sub> PO <sub>4</sub> <sup>+2</sup> | 774.472                | y <sub>8</sub>                                                | 993.5526 <sup>+2</sup>  | MH-H <sub>3</sub> PO <sub>4</sub> <sup>+2</sup> | 1611.7738 | b <sub>16</sub>                                 |
| 201.6392 <sup>+2</sup> | y <sub>4</sub> <sup>+2</sup>                                 | 529.3093               | b <sub>5</sub>                                                | 778.3900 <sup>+2</sup> | y <sub>16</sub> <sup>+2</sup>                                 | 1012.4459               | b <sub>10</sub>                                 | 1655.8711 | b <sub>18</sub> -H <sub>3</sub> PO <sub>4</sub> |
| 208.6162 <sup>+2</sup> | b <sub>4</sub> <sup>+2</sup>                                 | 536.8217 <sup>+2</sup> | y <sub>11</sub> <sup>+2</sup>                                 | 785.9436 <sup>+2</sup> | y <sub>17</sub> -H <sub>3</sub> PO <sub>4</sub> <sup>+2</sup> | 1028.5119               | b <sub>11</sub> -H <sub>3</sub> PO <sub>4</sub> | 1668.8568 | y <sub>17</sub>                                 |
| 218.1499               | y <sub>2</sub>                                               | 563.7481 <sup>+2</sup> | b <sub>11</sub> <sup>+2</sup>                                 | 792.9206 <sup>+2</sup> | b <sub>17</sub> -H <sub>3</sub> PO <sub>4</sub> <sup>+2</sup> | 1042.5410 <sup>+2</sup> | MH <sup>+2</sup>                                | 1671.9276 | y <sub>18</sub> -H <sub>3</sub> PO <sub>4</sub> |
| 237.1577 <sup>+2</sup> | y <sub>5</sub> <sup>+2</sup>                                 | 571.3016 <sup>+2</sup> | b <sub>12</sub> -H <sub>3</sub> PO <sub>4</sub> <sup>+2</sup> | 806.3905 <sup>+2</sup> | b <sub>16</sub> <sup>+2</sup>                                 | 1072.6361               | y <sub>11</sub>                                 | 1682.8109 | b <sub>17</sub>                                 |
| 244.1404               | b <sub>2</sub>                                               | 574.3559               | y <sub>6</sub>                                                | 813.4213               | b <sub>9</sub> -H <sub>3</sub> PO <sub>4</sub>                | 1126.4888               | b <sub>11</sub>                                 | 1742.9647 | y <sub>19</sub> -H <sub>3</sub> PO <sub>4</sub> |
| 265.1583 <sup>+2</sup> | b <sub>5</sub> <sup>+2</sup>                                 | 587.3455 <sup>+2</sup> | y <sub>12</sub> <sup>+2</sup>                                 | 828.4392 <sup>+2</sup> | b <sub>18</sub> -H <sub>3</sub> PO <sub>4</sub> <sup>+2</sup> | 1141.596                | b <sub>12</sub> -H <sub>3</sub> PO <sub>4</sub> | 1753.848  | b <sub>18</sub>                                 |
| 287.6816 <sup>+2</sup> | y <sub>6</sub> <sup>+2</sup>                                 | 606.8202 <sup>+2</sup> | b <sub>13</sub> -H <sub>3</sub> PO <sub>4</sub> <sup>+2</sup> | 834.9320 <sup>+2</sup> | y <sub>17</sub> <sup>+2</sup>                                 | 1173.6838               | y <sub>12</sub>                                 | 1768.9552 | b <sub>19</sub> -H <sub>3</sub> PO <sub>4</sub> |
| 308.6743 <sup>+2</sup> | b <sub>6</sub> <sup>+2</sup>                                 | 616.3413               | b <sub>6</sub>                                                | 836.4674 <sup>+2</sup> | y <sub>18</sub> -H <sub>3</sub> PO <sub>4</sub> <sup>+2</sup> | 1212.6331               | b <sub>13</sub> -H <sub>3</sub> PO <sub>4</sub> | 1769.9045 | y <sub>18</sub>                                 |
| 315.1775               | b <sub>3</sub>                                               | 620.2901 <sup>+2</sup> | b <sub>12</sub> <sup>+2</sup>                                 | 840.3611               | b <sub>8</sub>                                                | 1239.5729               | b <sub>12</sub>                                 | 1829.9967 | y <sub>20</sub> -H <sub>3</sub> PO <sub>4</sub> |
| 331.234                | y <sub>3</sub>                                               | 622.8641 <sup>+2</sup> | y <sub>13</sub> <sup>+2</sup>                                 | 841.9091 <sup>+2</sup> | b <sub>17</sub> <sup>+2</sup>                                 | 1244.7209               | y <sub>13</sub>                                 | 1839.9923 | b <sub>20</sub> -H <sub>3</sub> PO <sub>4</sub> |
| 337.1850 <sup>+2</sup> | b <sub>7</sub> <sup>+2</sup>                                 | 650.3362 <sup>+2</sup> | b <sub>14</sub> -H <sub>3</sub> PO <sub>4</sub> <sup>+2</sup> | 845.5091               | y <sub>9</sub>                                                | 1299.6652               | b <sub>14</sub> -H <sub>3</sub> PO <sub>4</sub> | 1840.9416 | y <sub>19</sub>                                 |
| 344.2236 <sup>+2</sup> | y <sub>7</sub> <sup>+2</sup>                                 | 655.8086 <sup>+2</sup> | b <sub>13</sub> <sup>+2</sup>                                 | 871.9860 <sup>+2</sup> | y <sub>19</sub> -H <sub>3</sub> PO <sub>4</sub> <sup>+2</sup> | 1310.61                 | b <sub>13</sub>                                 | 1866.9321 | b <sub>19</sub>                                 |
| 371.6958 <sup>+2</sup> | b <sub>8</sub> -H <sub>3</sub> PO <sub>4</sub> <sup>+2</sup> | 657.3748 <sup>+2</sup> | y <sub>14</sub> -H <sub>3</sub> PO <sub>4</sub> <sup>+2</sup> | 877.4276 <sup>+2</sup> | b <sub>18</sub> <sup>+2</sup>                                 | 1313.7423               | y <sub>14</sub> -H <sub>3</sub> PO <sub>4</sub> | 1927.9736 | y <sub>20</sub>                                 |
| 387.7396 <sup>+2</sup> | y <sub>8</sub> <sup>+2</sup>                                 | 673.3628               | b <sub>7</sub>                                                | 884.9812 <sup>+2</sup> | b <sub>19</sub> -H <sub>3</sub> PO <sub>4</sub> <sup>+2</sup> | 1370.7638               | y <sub>15</sub> -H <sub>3</sub> PO <sub>4</sub> | 1937.9692 | b <sub>20</sub>                                 |
| 402.2711               | y <sub>4</sub>                                               | 685.8855 <sup>+2</sup> | y <sub>15</sub> -H <sub>3</sub> PO <sub>4</sub> <sup>+2</sup> | 885.4559 <sup>+2</sup> | y <sub>18</sub> <sup>+2</sup>                                 | 1397.642                | b <sub>14</sub>                                 | 1986.0978 | MH-H <sub>3</sub> PO <sub>4</sub>               |
| 407.2143 <sup>+2</sup> | b <sub>9</sub> -H <sub>3</sub> PO <sub>4</sub> <sup>+2</sup> | 687.44                 | y <sub>7</sub>                                                | 911.3982               | b <sub>9</sub>                                                | 1411.7192               | y <sub>14</sub>                                 | 2084.0747 | MH                                              |
| 416.2252               | b <sub>4</sub>                                               | 699.3247 <sup>+2</sup> | b <sub>14</sub> <sup>+2</sup>                                 | 914.469                | b <sub>10</sub> -H <sub>3</sub> PO <sub>4</sub>               | 1412.7492               | b <sub>15</sub> -H <sub>3</sub> PO <sub>4</sub> |           |                                                 |
| 420.6842 <sup>+2</sup> | b <sub>8</sub> <sup>+2</sup>                                 | 706.3633 <sup>+2</sup> | y <sub>14</sub> <sup>+2</sup>                                 | 915.5020 <sup>+2</sup> | y <sub>20</sub> -H <sub>3</sub> PO <sub>4</sub> <sup>+2</sup> | 1457.7958               | y <sub>16</sub> -H <sub>3</sub> PO <sub>4</sub> |           |                                                 |
| 423.2582 <sup>+2</sup> | y <sub>9</sub> <sup>+2</sup>                                 | 706.8782 <sup>+2</sup> | b <sub>15</sub> -H <sub>3</sub> PO <sub>4</sub> <sup>+2</sup> | 920.4998 <sup>+2</sup> | b <sub>20</sub> -H <sub>3</sub> PO <sub>4</sub> <sup>+2</sup> | 1468.7407               | y <sub>15</sub>                                 |           |                                                 |

MS/MS Fragmentation of APSLPAPPYAGAPGsPR  
 Found in IPI00465409, ankyrin repeat domain 34

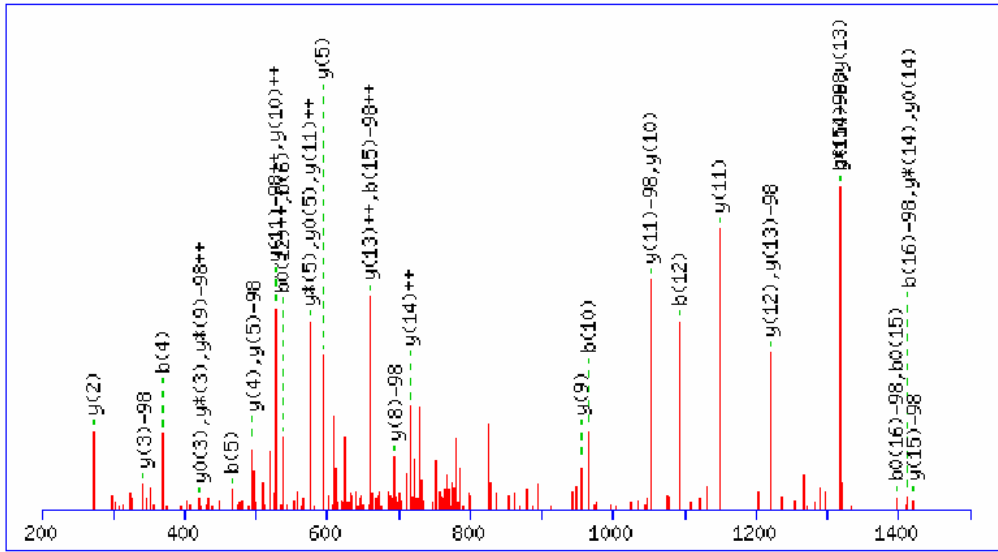

|                        |                                                              |                        |                                                               |                        |                                                               |                        |                                                 |           |                                                 |
|------------------------|--------------------------------------------------------------|------------------------|---------------------------------------------------------------|------------------------|---------------------------------------------------------------|------------------------|-------------------------------------------------|-----------|-------------------------------------------------|
| 88.0631 <sup>+2</sup>  | y <sub>1</sub> <sup>+2</sup>                                 | 361.1551 <sup>+2</sup> | y <sub>7</sub> <sup>+2</sup>                                  | 593.2443               | y <sub>5</sub>                                                | 807.8874 <sup>+2</sup> | y <sub>16</sub> <sup>+2</sup>                   | 1316.6634 | b <sub>15</sub> -H <sub>3</sub> PO <sub>4</sub> |
| 136.5895 <sup>+2</sup> | y <sub>2</sub> <sup>+2</sup>                                 | 369.2132               | b <sub>4</sub>                                                | 610.3146 <sup>+2</sup> | y <sub>13</sub> -H <sub>3</sub> PO <sub>4</sub> <sup>+2</sup> | 843.4060 <sup>+2</sup> | MH <sup>+2</sup>                                | 1317.5987 | y <sub>13</sub>                                 |
| 169.0972               | b <sub>2</sub>                                               | 396.6736 <sup>+2</sup> | y <sub>8</sub> <sup>+2</sup>                                  | 610.7766 <sup>+2</sup> | y <sub>12</sub> <sup>+2</sup>                                 | 857.4264               | y <sub>9</sub> -H <sub>3</sub> PO <sub>4</sub>  | 1332.7059 | y <sub>14</sub> -H <sub>3</sub> PO <sub>4</sub> |
| 171.1002 <sup>+2</sup> | y <sub>3</sub> -H <sub>3</sub> PO <sub>4</sub> <sup>+2</sup> | 398.2146               | y <sub>4</sub> -H <sub>3</sub> PO <sub>4</sub>                | 623.326                | y <sub>7</sub> -H <sub>3</sub> PO <sub>4</sub>                | 894.472                | b <sub>9</sub>                                  | 1413.7161 | b <sub>16</sub> -H <sub>3</sub> PO <sub>4</sub> |
| 175.119                | y <sub>1</sub>                                               | 429.2169 <sup>+2</sup> | y <sub>9</sub> -H <sub>3</sub> PO <sub>4</sub> <sup>+2</sup>  | 634.3559               | b <sub>7</sub>                                                | 954.4792               | y <sub>10</sub> -H <sub>3</sub> PO <sub>4</sub> | 1414.6403 | b <sub>15</sub>                                 |
| 199.6110 <sup>+2</sup> | y <sub>4</sub> -H <sub>3</sub> PO <sub>4</sub> <sup>+2</sup> | 439.1701               | y <sub>3</sub>                                                | 659.3030 <sup>+2</sup> | y <sub>13</sub> <sup>+2</sup>                                 | 955.4033               | y <sub>9</sub>                                  | 1419.7379 | y <sub>15</sub> -H <sub>3</sub> PO <sub>4</sub> |
| 220.0887 <sup>+2</sup> | y <sub>3</sub> <sup>+2</sup>                                 | 466.266                | b <sub>5</sub>                                                | 664.2814               | y <sub>6</sub>                                                | 965.5091               | b <sub>10</sub>                                 | 1430.6828 | y <sub>14</sub>                                 |
| 248.1373 <sup>+2</sup> | y <sub>5</sub> -H <sub>3</sub> PO <sub>4</sub> <sup>+2</sup> | 477.7432 <sup>+2</sup> | y <sub>10</sub> -H <sub>3</sub> PO <sub>4</sub> <sup>+2</sup> | 666.8566 <sup>+2</sup> | y <sub>14</sub> -H <sub>3</sub> PO <sub>4</sub> <sup>+2</sup> | 1022.5306              | b <sub>11</sub>                                 | 1511.693  | b <sub>16</sub>                                 |
| 248.5994 <sup>+2</sup> | y <sub>4</sub> <sup>+2</sup>                                 | 478.2053 <sup>+2</sup> | y <sub>9</sub> <sup>+2</sup>                                  | 694.3631               | y <sub>8</sub> -H <sub>3</sub> PO <sub>4</sub>                | 1051.532               | y <sub>11</sub> -H <sub>3</sub> PO <sub>4</sub> | 1516.7907 | y <sub>16</sub> -H <sub>3</sub> PO <sub>4</sub> |
| 256.1292               | b <sub>3</sub>                                               | 495.2674               | y <sub>5</sub> -H <sub>3</sub> PO <sub>4</sub>                | 710.3726 <sup>+2</sup> | y <sub>15</sub> -H <sub>3</sub> PO <sub>4</sub> <sup>+2</sup> | 1052.4561              | y <sub>10</sub>                                 | 1517.7148 | y <sub>15</sub>                                 |
| 272.1717               | y <sub>2</sub>                                               | 496.1915               | y <sub>4</sub>                                                | 715.8450 <sup>+2</sup> | y <sub>14</sub> <sup>+2</sup>                                 | 1093.5677              | b <sub>12</sub>                                 | 1587.8278 | MH-H <sub>3</sub> PO <sub>4</sub>               |
| 283.6559 <sup>+2</sup> | y <sub>6</sub> -H <sub>3</sub> PO <sub>4</sub> <sup>+2</sup> | 526.2696 <sup>+2</sup> | y <sub>11</sub> -H <sub>3</sub> PO <sub>4</sub> <sup>+2</sup> | 721.3029               | y <sub>7</sub>                                                | 1122.5691              | y <sub>12</sub> -H <sub>3</sub> PO <sub>4</sub> | 1614.7676 | y <sub>16</sub>                                 |
| 297.1258 <sup>+2</sup> | y <sub>5</sub> <sup>+2</sup>                                 | 526.7317 <sup>+2</sup> | y <sub>10</sub> <sup>+2</sup>                                 | 731.4087               | b <sub>8</sub>                                                | 1149.5088              | y <sub>11</sub>                                 | 1685.8047 | MH                                              |
| 312.1666 <sup>+2</sup> | y <sub>7</sub> -H <sub>3</sub> PO <sub>4</sub> <sup>+2</sup> | 537.3031               | b <sub>6</sub>                                                | 758.8990 <sup>+2</sup> | y <sub>16</sub> -H <sub>3</sub> PO <sub>4</sub> <sup>+2</sup> | 1190.6204              | b <sub>13</sub>                                 |           |                                                 |
| 332.6443 <sup>+2</sup> | y <sub>6</sub> <sup>+2</sup>                                 | 561.7882 <sup>+2</sup> | y <sub>12</sub> -H <sub>3</sub> PO <sub>4</sub> <sup>+2</sup> | 759.3610 <sup>+2</sup> | y <sub>15</sub> <sup>+2</sup>                                 | 1219.6218              | y <sub>13</sub> -H <sub>3</sub> PO <sub>4</sub> |           |                                                 |
| 341.1932               | y <sub>3</sub> -H <sub>3</sub> PO <sub>4</sub>               | 566.3045               | y <sub>6</sub> -H <sub>3</sub> PO <sub>4</sub>                | 792.34                 | y <sub>8</sub>                                                | 1220.546               | y <sub>12</sub>                                 |           |                                                 |
| 347.6852 <sup>+2</sup> | y <sub>8</sub> -H <sub>3</sub> PO <sub>4</sub> <sup>+2</sup> | 575.2581 <sup>+2</sup> | y <sub>11</sub> <sup>+2</sup>                                 | 794.4175 <sup>+2</sup> | MH-H <sub>3</sub> PO <sub>4</sub> <sup>+2</sup>               | 1247.6419              | b <sub>14</sub>                                 |           |                                                 |



MS/MS Fragmentation of QSQESLPGAVsPLSGR  
 Found in IPI00465409, ankyrin repeat domain 34

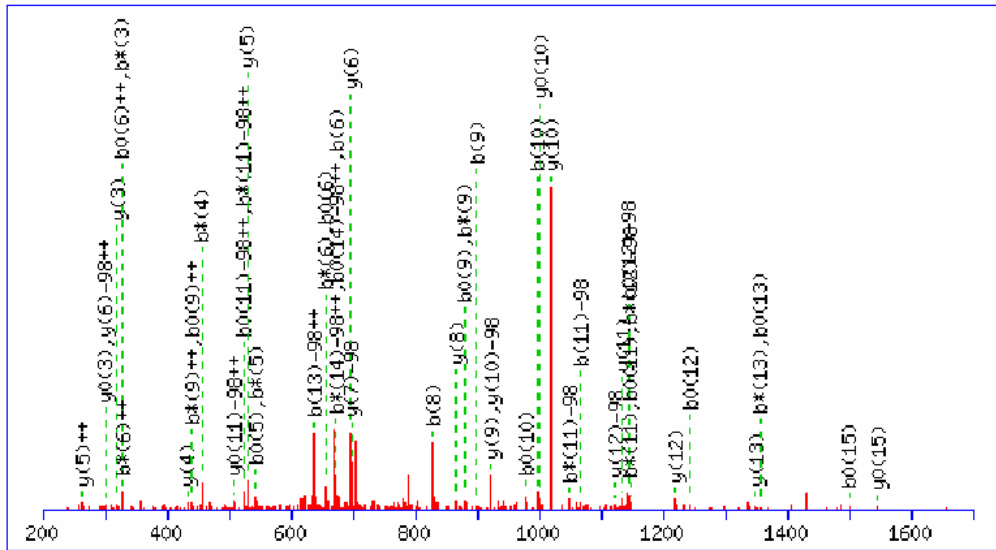

|                        |                                                              |                        |                                                               |                        |                                                               |           |                                                 |           |                                                 |
|------------------------|--------------------------------------------------------------|------------------------|---------------------------------------------------------------|------------------------|---------------------------------------------------------------|-----------|-------------------------------------------------|-----------|-------------------------------------------------|
| 88.0631 <sup>+2</sup>  | y <sub>1</sub> <sup>+2</sup>                                 | 413.2325 <sup>+2</sup> | y <sub>9</sub> -H <sub>3</sub> PO <sub>4</sub> <sup>+2</sup>  | 673.3151               | b <sub>6</sub>                                                | 866.4132  | y <sub>8</sub>                                  | 1276.6532 | b <sub>13</sub> -H <sub>3</sub> PO <sub>4</sub> |
| 116.5738 <sup>+2</sup> | y <sub>2</sub> <sup>+2</sup>                                 | 432.2565               | y <sub>4</sub>                                                | 675.3267 <sup>+2</sup> | y <sub>13</sub> <sup>+2</sup>                                 | 898.4265  | b <sub>9</sub>                                  | 1349.6461 | y <sub>13</sub>                                 |
| 160.0899 <sup>+2</sup> | y <sub>3</sub> <sup>+2</sup>                                 | 433.7102 <sup>+2</sup> | y <sub>8</sub> <sup>+2</sup>                                  | 690.3675 <sup>+2</sup> | y <sub>14</sub> -H <sub>3</sub> PO <sub>4</sub> <sup>+2</sup> | 922.5105  | y <sub>10</sub> -H <sub>3</sub> PO <sub>4</sub> | 1363.6852 | b <sub>14</sub> -H <sub>3</sub> PO <sub>4</sub> |
| 175.119                | y <sub>1</sub>                                               | 461.7589 <sup>+2</sup> | y <sub>10</sub> -H <sub>3</sub> PO <sub>4</sub> <sup>+2</sup> | 696.3076               | y <sub>6</sub>                                                | 923.4346  | y <sub>9</sub>                                  | 1374.6301 | b <sub>13</sub>                                 |
| 216.0979               | b <sub>2</sub>                                               | 462.2209 <sup>+2</sup> | y <sub>9</sub> <sup>+2</sup>                                  | 697.3991               | y <sub>7</sub> -H <sub>3</sub> PO <sub>4</sub>                | 997.4949  | b <sub>10</sub>                                 | 1379.7278 | y <sub>14</sub> -H <sub>3</sub> PO <sub>4</sub> |
| 216.6319 <sup>+2</sup> | y <sub>4</sub> <sup>+2</sup>                                 | 473.1991               | b <sub>4</sub>                                                | 733.8835 <sup>+2</sup> | y <sub>15</sub> -H <sub>3</sub> PO <sub>4</sub> <sup>+2</sup> | 1020.4874 | y <sub>10</sub>                                 | 1420.7067 | b <sub>15</sub> -H <sub>3</sub> PO <sub>4</sub> |
| 232.1404               | y <sub>2</sub>                                               | 510.7473 <sup>+2</sup> | y <sub>10</sub> <sup>+2</sup>                                 | 739.3560 <sup>+2</sup> | y <sub>14</sub> <sup>+2</sup>                                 | 1035.5946 | y <sub>11</sub> -H <sub>3</sub> PO <sub>4</sub> | 1461.6621 | b <sub>14</sub>                                 |
| 265.1583 <sup>+2</sup> | y <sub>5</sub> <sup>+2</sup>                                 | 518.3009 <sup>+2</sup> | y <sub>11</sub> -H <sub>3</sub> PO <sub>4</sub> <sup>+2</sup> | 768.4363               | y <sub>8</sub> -H <sub>3</sub> PO <sub>4</sub>                | 1066.5164 | b <sub>11</sub> -H <sub>3</sub> PO <sub>4</sub> | 1466.7598 | y <sub>15</sub> -H <sub>3</sub> PO <sub>4</sub> |
| 299.6690 <sup>+2</sup> | y <sub>6</sub> -H <sub>3</sub> PO <sub>4</sub> <sup>+2</sup> | 529.3093               | y <sub>5</sub>                                                | 770.3679               | b <sub>7</sub>                                                | 1122.6266 | y <sub>12</sub> -H <sub>3</sub> PO <sub>4</sub> | 1477.7046 | y <sub>14</sub>                                 |
| 319.1724               | y <sub>3</sub>                                               | 560.2311               | b <sub>5</sub>                                                | 782.8720 <sup>+2</sup> | y <sub>15</sub> <sup>+2</sup>                                 | 1133.5715 | y <sub>11</sub>                                 | 1518.6836 | b <sub>15</sub>                                 |
| 344.1565               | b <sub>3</sub>                                               | 561.8169 <sup>+2</sup> | y <sub>12</sub> -H <sub>3</sub> PO <sub>4</sub> <sup>+2</sup> | 795.376                | y <sub>7</sub>                                                | 1163.5691 | b <sub>12</sub> -H <sub>3</sub> PO <sub>4</sub> | 1564.7367 | y <sub>15</sub>                                 |
| 348.6575 <sup>+2</sup> | y <sub>6</sub> <sup>+2</sup>                                 | 567.2894 <sup>+2</sup> | y <sub>11</sub> <sup>+2</sup>                                 | 797.9128 <sup>+2</sup> | MH-H <sub>3</sub> PO <sub>4</sub> <sup>+2</sup>               | 1164.4933 | b <sub>11</sub>                                 | 1594.8184 | MH-H <sub>3</sub> PO <sub>4</sub>               |
| 349.2032 <sup>+2</sup> | y <sub>7</sub> -H <sub>3</sub> PO <sub>4</sub> <sup>+2</sup> | 598.3307               | y <sub>6</sub> -H <sub>3</sub> PO <sub>4</sub>                | 825.4577               | y <sub>9</sub> -H <sub>3</sub> PO <sub>4</sub>                | 1220.6035 | y <sub>12</sub>                                 | 1692.7953 | MH                                              |
| 384.7218 <sup>+2</sup> | y <sub>8</sub> -H <sub>3</sub> PO <sub>4</sub> <sup>+2</sup> | 610.8054 <sup>+2</sup> | y <sub>12</sub> <sup>+2</sup>                                 | 827.3894               | b <sub>8</sub>                                                | 1251.6692 | y <sub>13</sub> -H <sub>3</sub> PO <sub>4</sub> |           |                                                 |
| 398.1917 <sup>+2</sup> | y <sub>7</sub> <sup>+2</sup>                                 | 626.3382 <sup>+2</sup> | y <sub>13</sub> -H <sub>3</sub> PO <sub>4</sub> <sup>+2</sup> | 846.9013 <sup>+2</sup> | MH <sup>+2</sup>                                              | 1261.546  | b <sub>12</sub>                                 |           |                                                 |

MS/MS Fragmentation of RNtAPEAQESGPPSGLR  
 Found in IPI00465409, ankyrin repeat domain 34

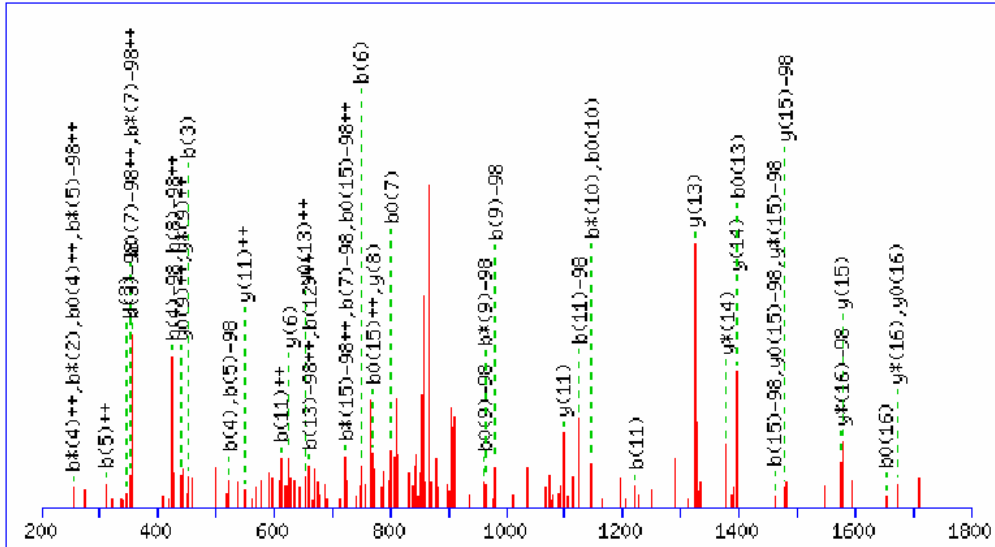

|                        |                                                              |                        |                                                               |                        |                                                               |                        |                                                               |           |                                                 |
|------------------------|--------------------------------------------------------------|------------------------|---------------------------------------------------------------|------------------------|---------------------------------------------------------------|------------------------|---------------------------------------------------------------|-----------|-------------------------------------------------|
| 88.0631 <sup>+2</sup>  | y <sub>1</sub> <sup>+2</sup>                                 | 361.6826 <sup>+2</sup> | b <sub>7</sub> -H <sub>3</sub> PO <sub>4</sub> <sup>+2</sup>  | 610.7864 <sup>+2</sup> | b <sub>12</sub> -H <sub>3</sub> PO <sub>4</sub> <sup>+2</sup> | 787.8815 <sup>+2</sup> | b <sub>16</sub> -H <sub>3</sub> PO <sub>4</sub> <sup>+2</sup> | 1227.5964 | y <sub>12</sub>                                 |
| 136.0793 <sup>+2</sup> | b <sub>2</sub> <sup>+2</sup>                                 | 375.1525 <sup>+2</sup> | b <sub>6</sub> <sup>+2</sup>                                  | 611.2484 <sup>+2</sup> | b <sub>11</sub> <sup>+2</sup>                                 | 788.8538 <sup>+2</sup> | y <sub>15</sub> <sup>+2</sup>                                 | 1317.6182 | b <sub>13</sub> -H <sub>3</sub> PO <sub>4</sub> |
| 144.6051 <sup>+2</sup> | y <sub>2</sub> <sup>+2</sup>                                 | 385.7114 <sup>+2</sup> | y <sub>8</sub> <sup>+2</sup>                                  | 614.3018 <sup>+2</sup> | y <sub>12</sub> <sup>+2</sup>                                 | 796.8868 <sup>+2</sup> | y <sub>16</sub> -H <sub>3</sub> PO <sub>4</sub> <sup>+2</sup> | 1318.5423 | b <sub>12</sub>                                 |
| 173.1159 <sup>+2</sup> | y <sub>3</sub> <sup>+2</sup>                                 | 410.6711 <sup>+2</sup> | b <sub>7</sub> <sup>+2</sup>                                  | 620.2552               | b <sub>5</sub>                                                | 820.3349               | b <sub>7</sub>                                                | 1324.6492 | y <sub>13</sub>                                 |
| 175.119                | y <sub>1</sub>                                               | 425.2255               | b <sub>4</sub> -H <sub>3</sub> PO <sub>4</sub>                | 626.362                | y <sub>6</sub>                                                | 836.8700 <sup>+2</sup> | b <sub>16</sub> <sup>+2</sup>                                 | 1395.6863 | y <sub>14</sub>                                 |
| 177.5979 <sup>+2</sup> | b <sub>3</sub> -H <sub>3</sub> PO <sub>4</sub> <sup>+2</sup> | 425.7119 <sup>+2</sup> | b <sub>8</sub> -H <sub>3</sub> PO <sub>4</sub> <sup>+2</sup>  | 651.3209               | b <sub>6</sub> -H <sub>3</sub> PO <sub>4</sub>                | 845.8752 <sup>+2</sup> | y <sub>16</sub> <sup>+2</sup>                                 | 1404.6502 | b <sub>14</sub> -H <sub>3</sub> PO <sub>4</sub> |
| 213.1164 <sup>+2</sup> | b <sub>4</sub> -H <sub>3</sub> PO <sub>4</sub> <sup>+2</sup> | 432.2565               | y <sub>4</sub>                                                | 659.3127 <sup>+2</sup> | b <sub>13</sub> -H <sub>3</sub> PO <sub>4</sub> <sup>+2</sup> | 850.4166               | b <sub>8</sub> -H <sub>3</sub> PO <sub>4</sub>                | 1415.5951 | b <sub>13</sub>                                 |
| 216.6319 <sup>+2</sup> | y <sub>4</sub> <sup>+2</sup>                                 | 450.2327 <sup>+2</sup> | y <sub>9</sub> <sup>+2</sup>                                  | 659.7748 <sup>+2</sup> | b <sub>12</sub> <sup>+2</sup>                                 | 874.9374 <sup>+2</sup> | MH-H <sub>3</sub> PO <sub>4</sub> <sup>+2</sup>               | 1461.6717 | b <sub>15</sub> -H <sub>3</sub> PO <sub>4</sub> |
| 226.5863 <sup>+2</sup> | b <sub>3</sub> <sup>+2</sup>                                 | 452.1653               | b <sub>3</sub>                                                | 662.8282 <sup>+2</sup> | y <sub>13</sub> <sup>+2</sup>                                 | 899.4581               | y <sub>9</sub>                                                | 1478.7234 | y <sub>15</sub> -H <sub>3</sub> PO <sub>4</sub> |
| 261.6428 <sup>+2</sup> | b <sub>5</sub> -H <sub>3</sub> PO <sub>4</sub> <sup>+2</sup> | 474.7004 <sup>+2</sup> | b <sub>8</sub> <sup>+2</sup>                                  | 683.3835               | y <sub>7</sub>                                                | 923.9258 <sup>+2</sup> | MH <sup>+2</sup>                                              | 1502.6271 | b <sub>14</sub>                                 |
| 262.1049 <sup>+2</sup> | b <sub>4</sub> <sup>+2</sup>                                 | 490.2332 <sup>+2</sup> | b <sub>9</sub> -H <sub>3</sub> PO <sub>4</sub> <sup>+2</sup>  | 698.3468 <sup>+2</sup> | y <sub>14</sub> <sup>+2</sup>                                 | 948.3935               | b <sub>8</sub>                                                | 1559.6486 | b <sub>15</sub>                                 |
| 265.1583 <sup>+2</sup> | y <sub>5</sub> <sup>+2</sup>                                 | 514.2620 <sup>+2</sup> | y <sub>10</sub> <sup>+2</sup>                                 | 702.8288 <sup>+2</sup> | b <sub>14</sub> -H <sub>3</sub> PO <sub>4</sub> <sup>+2</sup> | 979.4592               | b <sub>9</sub> -H <sub>3</sub> PO <sub>4</sub>                | 1574.7558 | b <sub>16</sub> -H <sub>3</sub> PO <sub>4</sub> |
| 271.1513               | b <sub>2</sub>                                               | 522.2783               | b <sub>5</sub> -H <sub>3</sub> PO <sub>4</sub>                | 708.3012 <sup>+2</sup> | b <sub>13</sub> <sup>+2</sup>                                 | 1027.5167              | y <sub>10</sub>                                               | 1576.7003 | y <sub>15</sub>                                 |
| 288.203                | y <sub>2</sub>                                               | 523.2024               | b <sub>4</sub>                                                | 722.358                | b <sub>7</sub> -H <sub>3</sub> PO <sub>4</sub>                | 1066.4912              | b <sub>10</sub> -H <sub>3</sub> PO <sub>4</sub>               | 1592.7663 | y <sub>16</sub> -H <sub>3</sub> PO <sub>4</sub> |
| 310.6312 <sup>+2</sup> | b <sub>5</sub> <sup>+2</sup>                                 | 529.3093               | y <sub>5</sub>                                                | 731.3395 <sup>+2</sup> | b <sub>15</sub> -H <sub>3</sub> PO <sub>4</sub> <sup>+2</sup> | 1077.4361              | b <sub>9</sub>                                                | 1672.7327 | b <sub>16</sub>                                 |
| 313.6847 <sup>+2</sup> | y <sub>6</sub> <sup>+2</sup>                                 | 533.7492 <sup>+2</sup> | b <sub>10</sub> -H <sub>3</sub> PO <sub>4</sub> <sup>+2</sup> | 739.8653 <sup>+2</sup> | y <sub>15</sub> -H <sub>3</sub> PO <sub>4</sub> <sup>+2</sup> | 1098.5538              | y <sub>11</sub>                                               | 1690.7432 | y <sub>16</sub>                                 |
| 326.1641 <sup>+2</sup> | b <sub>6</sub> -H <sub>3</sub> PO <sub>4</sub> <sup>+2</sup> | 539.2217 <sup>+2</sup> | b <sub>9</sub> <sup>+2</sup>                                  | 749.2978               | b <sub>6</sub>                                                | 1123.5127              | b <sub>11</sub> -H <sub>3</sub> PO <sub>4</sub>               | 1748.8674 | MH-H <sub>3</sub> PO <sub>4</sub>               |
| 342.1954 <sup>+2</sup> | y <sub>7</sub> <sup>+2</sup>                                 | 549.7805 <sup>+2</sup> | y <sub>11</sub> <sup>+2</sup>                                 | 751.8172 <sup>+2</sup> | b <sub>14</sub> <sup>+2</sup>                                 | 1164.4681              | b <sub>10</sub>                                               | 1846.8443 | MH                                              |
| 345.2245               | y <sub>3</sub>                                               | 562.2600 <sup>+2</sup> | b <sub>11</sub> -H <sub>3</sub> PO <sub>4</sub> <sup>+2</sup> | 770.4155               | y <sub>8</sub>                                                | 1220.5654              | b <sub>12</sub> -H <sub>3</sub> PO <sub>4</sub>               |           |                                                 |
| 354.1884               | b <sub>3</sub> -H <sub>3</sub> PO <sub>4</sub>               | 582.7377 <sup>+2</sup> | b <sub>10</sub> <sup>+2</sup>                                 | 780.3279 <sup>+2</sup> | b <sub>15</sub> <sup>+2</sup>                                 | 1221.4896              | b <sub>11</sub>                                               |           |                                                 |

MS/MS Fragmentation of QAGAPGGSSSGSGsPELSALR  
 Found in IPI00032236, Isoform 2 of Angiotensin-like protein 2

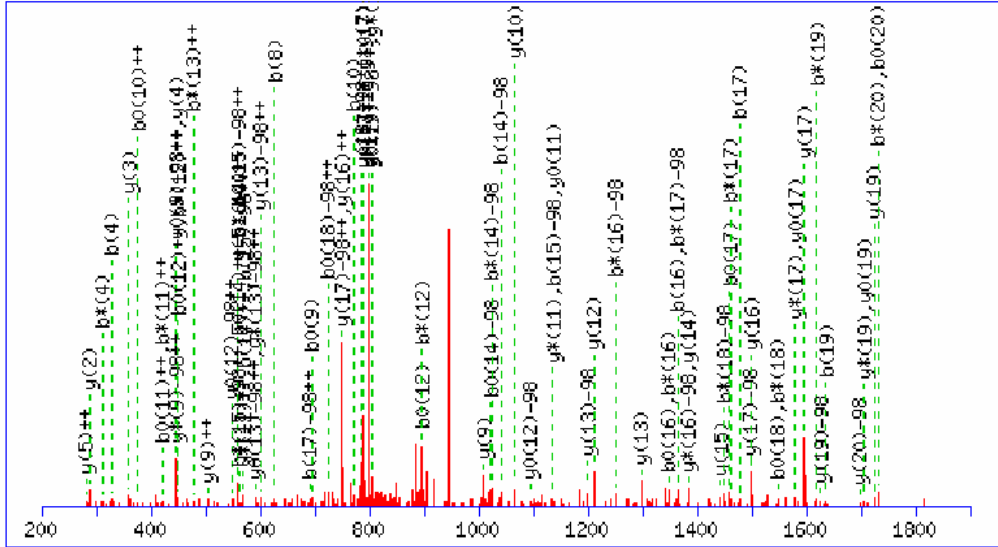

|                        |                                                               |                        |                                                               |                        |                                                               |           |                                                 |           |                                                 |
|------------------------|---------------------------------------------------------------|------------------------|---------------------------------------------------------------|------------------------|---------------------------------------------------------------|-----------|-------------------------------------------------|-----------|-------------------------------------------------|
| 88.0631 <sup>+2</sup>  | y <sub>1</sub> <sup>+2</sup>                                  | 505.2393 <sup>+2</sup> | y <sub>9</sub> <sup>+2</sup>                                  | 770.3428               | b <sub>10</sub>                                               | 1055.548  | y <sub>11</sub> -H <sub>3</sub> PO <sub>4</sub> | 1497.7292 | y <sub>17</sub> -H <sub>3</sub> PO <sub>4</sub> |
| 144.6051 <sup>+2</sup> | y <sub>2</sub> <sup>+2</sup>                                  | 528.2776 <sup>+2</sup> | y <sub>11</sub> -H <sub>3</sub> PO <sub>4</sub> <sup>+2</sup> | 784.8868 <sup>+2</sup> | y <sub>18</sub> -H <sub>3</sub> PO <sub>4</sub> <sup>+2</sup> | 1066.4929 | y <sub>10</sub>                                 | 1498.6533 | y <sub>16</sub>                                 |
| 175.119                | y <sub>1</sub>                                                | 533.7501 <sup>+2</sup> | y <sub>10</sub> <sup>+2</sup>                                 | 785.4516               | y <sub>7</sub>                                                | 1112.5695 | y <sub>12</sub> -H <sub>3</sub> PO <sub>4</sub> | 1537.6877 | b <sub>19</sub> -H <sub>3</sub> PO <sub>4</sub> |
| 180.1237 <sup>+2</sup> | y <sub>3</sub> <sup>+2</sup>                                  | 539.2572               | b <sub>7</sub>                                                | 798.3567 <sup>+2</sup> | y <sub>17</sub> <sup>+2</sup>                                 | 1137.4919 | b <sub>15</sub> -H <sub>3</sub> PO <sub>4</sub> | 1564.6275 | b <sub>18</sub>                                 |
| 200.103                | b <sub>2</sub>                                                | 556.7884 <sup>+2</sup> | y <sub>12</sub> -H <sub>3</sub> PO <sub>4</sub> <sup>+2</sup> | 813.3975 <sup>+2</sup> | y <sub>19</sub> -H <sub>3</sub> PO <sub>4</sub> <sup>+2</sup> | 1138.4161 | b <sub>14</sub>                                 | 1568.7663 | y <sub>18</sub> -H <sub>3</sub> PO <sub>4</sub> |
| 223.6397 <sup>+2</sup> | y <sub>4</sub> <sup>+2</sup>                                  | 559.3562               | y <sub>5</sub>                                                | 833.8752 <sup>+2</sup> | y <sub>18</sub> <sup>+2</sup>                                 | 1153.5249 | y <sub>11</sub>                                 | 1595.7061 | y <sub>17</sub>                                 |
| 257.1244               | b <sub>3</sub>                                                | 577.2661 <sup>+2</sup> | y <sub>11</sub> <sup>+2</sup>                                 | 848.9161 <sup>+2</sup> | y <sub>20</sub> -H <sub>3</sub> PO <sub>4</sub> <sup>+2</sup> | 1199.6015 | y <sub>13</sub> -H <sub>3</sub> PO <sub>4</sub> | 1625.7878 | y <sub>19</sub> -H <sub>3</sub> PO <sub>4</sub> |
| 280.1817 <sup>+2</sup> | y <sub>5</sub> <sup>+2</sup>                                  | 600.3044 <sup>+2</sup> | y <sub>13</sub> -H <sub>3</sub> PO <sub>4</sub> <sup>+2</sup> | 854.473                | y <sub>8</sub> -H <sub>3</sub> PO <sub>4</sub>                | 1210.5464 | y <sub>12</sub>                                 | 1635.6646 | b <sub>19</sub>                                 |
| 288.203                | y <sub>2</sub>                                                | 605.7768 <sup>+2</sup> | y <sub>12</sub> <sup>+2</sup>                                 | 857.3748               | b <sub>11</sub>                                               | 1235.4688 | b <sub>15</sub>                                 | 1650.7718 | b <sub>20</sub> -H <sub>3</sub> PO <sub>4</sub> |
| 328.1615               | b <sub>4</sub>                                                | 626.2893               | b <sub>8</sub>                                                | 862.3860 <sup>+2</sup> | y <sub>19</sub> <sup>+2</sup>                                 | 1266.5345 | b <sub>16</sub> -H <sub>3</sub> PO <sub>4</sub> | 1666.7432 | y <sub>18</sub>                                 |
| 344.7030 <sup>+2</sup> | y <sub>6</sub> <sup>+2</sup>                                  | 643.8204 <sup>+2</sup> | y <sub>14</sub> -H <sub>3</sub> PO <sub>4</sub> <sup>+2</sup> | 897.9045 <sup>+2</sup> | y <sub>20</sub> <sup>+2</sup>                                 | 1286.6335 | y <sub>14</sub> -H <sub>3</sub> PO <sub>4</sub> | 1696.8249 | y <sub>20</sub> -H <sub>3</sub> PO <sub>4</sub> |
| 359.2401               | y <sub>3</sub>                                                | 649.2928 <sup>+2</sup> | y <sub>13</sub> <sup>+2</sup>                                 | 911.4945               | y <sub>9</sub> -H <sub>3</sub> PO <sub>4</sub>                | 1297.5784 | y <sub>13</sub>                                 | 1723.7647 | y <sub>19</sub>                                 |
| 393.2294 <sup>+2</sup> | y <sub>7</sub> <sup>+2</sup>                                  | 672.3311 <sup>+2</sup> | y <sub>15</sub> -H <sub>3</sub> PO <sub>4</sub> <sup>+2</sup> | 912.9454 <sup>+2</sup> | MH-H <sub>3</sub> PO <sub>4</sub> <sup>+2</sup>               | 1343.655  | y <sub>15</sub> -H <sub>3</sub> PO <sub>4</sub> | 1748.7487 | b <sub>20</sub>                                 |
| 425.2143               | b <sub>5</sub>                                                | 688.3988               | y <sub>6</sub>                                                | 914.3962               | b <sub>12</sub>                                               | 1364.5114 | b <sub>16</sub>                                 | 1794.8018 | y <sub>20</sub>                                 |
| 427.7402 <sup>+2</sup> | y <sub>8</sub> -H <sub>3</sub> PO <sub>4</sub> <sup>+2</sup>  | 692.8088 <sup>+2</sup> | y <sub>14</sub> <sup>+2</sup>                                 | 952.4499               | y <sub>8</sub>                                                | 1379.6186 | b <sub>17</sub> -H <sub>3</sub> PO <sub>4</sub> | 1824.8835 | MH-H <sub>3</sub> PO <sub>4</sub>               |
| 446.2722               | y <sub>4</sub>                                                | 700.8419 <sup>+2</sup> | y <sub>16</sub> -H <sub>3</sub> PO <sub>4</sub> <sup>+2</sup> | 961.9338 <sup>+2</sup> | MH <sup>+2</sup>                                              | 1384.6104 | y <sub>14</sub>                                 | 1922.8604 | MH                                              |
| 456.2509 <sup>+2</sup> | y <sub>9</sub> -H <sub>3</sub> PO <sub>4</sub> <sup>+2</sup>  | 713.3213               | b <sub>9</sub>                                                | 968.516                | y <sub>10</sub> -H <sub>3</sub> PO <sub>4</sub>               | 1400.6764 | y <sub>16</sub> -H <sub>3</sub> PO <sub>4</sub> |           |                                                 |
| 476.7286 <sup>+2</sup> | y <sub>8</sub> <sup>+2</sup>                                  | 721.3196 <sup>+2</sup> | y <sub>15</sub> <sup>+2</sup>                                 | 971.4177               | b <sub>13</sub>                                               | 1441.6319 | y <sub>15</sub>                                 |           |                                                 |
| 482.2358               | b <sub>6</sub>                                                | 749.3682 <sup>+2</sup> | y <sub>17</sub> -H <sub>3</sub> PO <sub>4</sub> <sup>+2</sup> | 1009.4714              | y <sub>9</sub>                                                | 1466.6506 | b <sub>18</sub> -H <sub>3</sub> PO <sub>4</sub> |           |                                                 |
| 484.7616 <sup>+2</sup> | y <sub>10</sub> -H <sub>3</sub> PO <sub>4</sub> <sup>+2</sup> | 749.8303 <sup>+2</sup> | y <sub>16</sub> <sup>+2</sup>                                 | 1040.4392              | b <sub>14</sub> -H <sub>3</sub> PO <sub>4</sub>               | 1477.5955 | b <sub>17</sub>                                 |           |                                                 |

MS/MS Fragmentation of SAsADNLTLP  
 Found in IPI00336159, cyclin fold protein 1 isoform 2

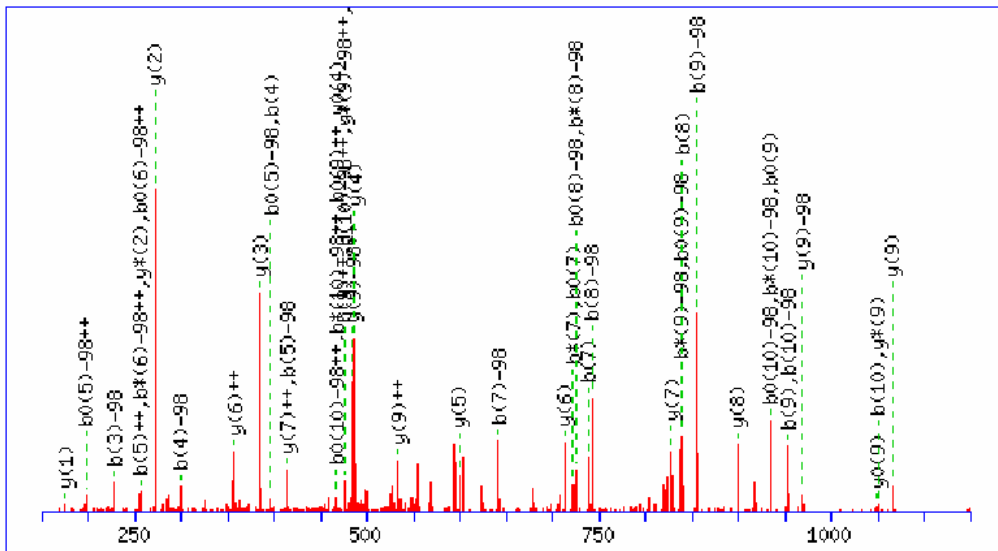

|                        |                                                |                        |                                                              |                        |                                                               |          |                                                |           |                                                 |
|------------------------|------------------------------------------------|------------------------|--------------------------------------------------------------|------------------------|---------------------------------------------------------------|----------|------------------------------------------------|-----------|-------------------------------------------------|
| 88.0631 <sup>+2</sup>  | y <sub>1</sub> <sup>+2</sup>                   | 300.1974 <sup>+2</sup> | y <sub>5</sub> <sup>+2</sup>                                 | 486.3035               | y <sub>4</sub>                                                | 626.1818 | b <sub>6</sub>                                 | 952.4734  | b <sub>10</sub> -H <sub>3</sub> PO <sub>4</sub> |
| 136.5895 <sup>+2</sup> | y <sub>2</sub> <sup>+2</sup>                   | 326.0748               | b <sub>3</sub>                                               | 512.1388               | b <sub>5</sub>                                                | 641.2889 | b <sub>7</sub> -H <sub>3</sub> PO <sub>4</sub> | 953.3976  | b <sub>9</sub>                                  |
| 159.0764               | b <sub>2</sub>                                 | 357.2189 <sup>+2</sup> | y <sub>6</sub> <sup>+2</sup>                                 | 520.2802 <sup>+2</sup> | y <sub>10</sub> -H <sub>3</sub> PO <sub>4</sub> <sup>+2</sup> | 713.4304 | y <sub>6</sub>                                 | 968.516   | y <sub>9</sub> -H <sub>3</sub> PO <sub>4</sub>  |
| 175.119                | y <sub>1</sub>                                 | 385.2558               | y <sub>3</sub>                                               | 528.2049               | b <sub>6</sub> -H <sub>3</sub> PO <sub>4</sub>                | 739.2658 | b <sub>7</sub>                                 | 1039.5531 | y <sub>10</sub> -H <sub>3</sub> PO <sub>4</sub> |
| 193.1315 <sup>+2</sup> | y <sub>3</sub> <sup>+2</sup>                   | 397.1119               | b <sub>4</sub>                                               | 533.7501 <sup>+2</sup> | y <sub>9</sub> <sup>+2</sup>                                  | 742.3366 | b <sub>8</sub> -H <sub>3</sub> PO <sub>4</sub> | 1050.4503 | b <sub>10</sub>                                 |
| 228.0979               | b <sub>3</sub> -H <sub>3</sub> PO <sub>4</sub> | 414.1619               | b <sub>5</sub> -H <sub>3</sub> PO <sub>4</sub>               | 563.7962 <sup>+2</sup> | MH-H <sub>3</sub> PO <sub>4</sub> <sup>+2</sup>               | 828.4574 | y <sub>7</sub>                                 | 1066.4929 | y <sub>9</sub>                                  |
| 243.6554 <sup>+2</sup> | y <sub>4</sub> <sup>+2</sup>                   | 414.7323 <sup>+2</sup> | y <sub>7</sub> <sup>+2</sup>                                 | 569.2686 <sup>+2</sup> | y <sub>10</sub> <sup>+2</sup>                                 | 840.3135 | b <sub>8</sub>                                 | 1126.5851 | MH-H <sub>3</sub> PO <sub>4</sub>               |
| 272.1717               | y <sub>2</sub>                                 | 450.2509 <sup>+2</sup> | y <sub>8</sub> <sup>+2</sup>                                 | 599.3875               | y <sub>5</sub>                                                | 855.4207 | b <sub>9</sub> -H <sub>3</sub> PO <sub>4</sub> | 1137.53   | y <sub>10</sub>                                 |
| 299.135                | b <sub>4</sub> -H <sub>3</sub> PO <sub>4</sub> | 484.7616 <sup>+2</sup> | y <sub>9</sub> -H <sub>3</sub> PO <sub>4</sub> <sup>+2</sup> | 612.7846 <sup>+2</sup> | MH <sup>+2</sup>                                              | 899.4945 | y <sub>8</sub>                                 | 1224.562  | MH                                              |

MS/MS Fragmentation of ASTIFLSKsQTDVR  
 Found in IPI00336159, cyclin fold protein 1 isoform 2

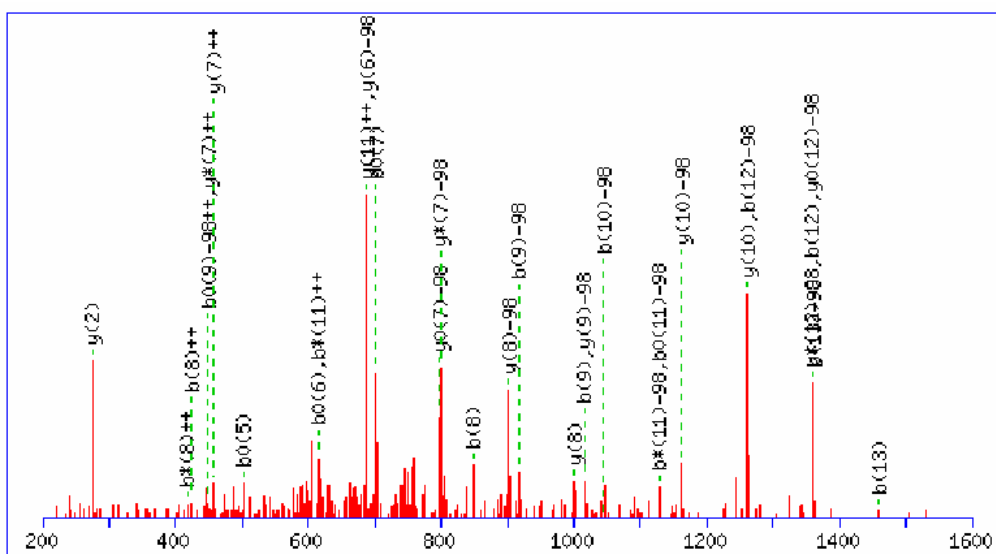

|                        |                                                              |                        |                                                               |                        |                                                               |                        |                                                 |           |                                                 |
|------------------------|--------------------------------------------------------------|------------------------|---------------------------------------------------------------|------------------------|---------------------------------------------------------------|------------------------|-------------------------------------------------|-----------|-------------------------------------------------|
| 88.0631 <sup>+2</sup>  | y <sub>1</sub> <sup>+2</sup>                                 | 451.7381 <sup>+2</sup> | y <sub>8</sub> -H <sub>3</sub> PO <sub>4</sub> <sup>+2</sup>  | 630.8028 <sup>+2</sup> | y <sub>10</sub> <sup>+2</sup>                                 | 785.3189               | y <sub>6</sub>                                  | 1244.5922 | b <sub>11</sub>                                 |
| 137.5973 <sup>+2</sup> | y <sub>2</sub> <sup>+2</sup>                                 | 457.2106 <sup>+2</sup> | y <sub>7</sub> <sup>+2</sup>                                  | 631.3248 <sup>+2</sup> | b <sub>12</sub> -H <sub>3</sub> PO <sub>4</sub> <sup>+2</sup> | 815.437                | y <sub>7</sub> -H <sub>3</sub> PO <sub>4</sub>  | 1260.5984 | y <sub>10</sub>                                 |
| 159.0764               | b <sub>2</sub>                                               | 459.2582 <sup>+2</sup> | b <sub>9</sub> -H <sub>3</sub> PO <sub>4</sub> <sup>+2</sup>  | 633.3606               | b <sub>6</sub>                                                | 816.9033 <sup>+2</sup> | MH <sup>+2</sup>                                | 1261.6423 | b <sub>12</sub> -H <sub>3</sub> PO <sub>4</sub> |
| 175.119                | y <sub>1</sub>                                               | 490.262                | y <sub>4</sub>                                                | 638.3564 <sup>+2</sup> | y <sub>11</sub> -H <sub>3</sub> PO <sub>4</sub> <sup>+2</sup> | 848.4876               | b <sub>8</sub>                                  | 1275.7056 | y <sub>11</sub> -H <sub>3</sub> PO <sub>4</sub> |
| 195.1108 <sup>+2</sup> | y <sub>3</sub> <sup>+2</sup>                                 | 500.7266 <sup>+2</sup> | y <sub>8</sub> <sup>+2</sup>                                  | 680.3132 <sup>+2</sup> | b <sub>12</sub> <sup>+2</sup>                                 | 902.469                | y <sub>8</sub> -H <sub>3</sub> PO <sub>4</sub>  | 1359.6192 | b <sub>12</sub>                                 |
| 245.6346 <sup>+2</sup> | y <sub>4</sub> <sup>+2</sup>                                 | 508.2466 <sup>+2</sup> | b <sub>9</sub> <sup>+2</sup>                                  | 680.8590 <sup>+2</sup> | b <sub>13</sub> -H <sub>3</sub> PO <sub>4</sub> <sup>+2</sup> | 913.4139               | y <sub>7</sub>                                  | 1360.7107 | b <sub>13</sub> -H <sub>3</sub> PO <sub>4</sub> |
| 260.1241               | b <sub>3</sub>                                               | 508.2802 <sup>+2</sup> | y <sub>9</sub> -H <sub>3</sub> PO <sub>4</sub> <sup>+2</sup>  | 687.342                | y <sub>6</sub> -H <sub>3</sub> PO <sub>4</sub>                | 917.5091               | b <sub>9</sub> -H <sub>3</sub> PO <sub>4</sub>  | 1373.6825 | y <sub>11</sub>                                 |
| 274.1874               | y <sub>2</sub>                                               | 520.2766               | b <sub>5</sub>                                                | 687.3449 <sup>+2</sup> | y <sub>11</sub> <sup>+2</sup>                                 | 1000.4459              | y <sub>8</sub>                                  | 1376.7532 | y <sub>12</sub> -H <sub>3</sub> PO <sub>4</sub> |
| 309.6639 <sup>+2</sup> | y <sub>5</sub> <sup>+2</sup>                                 | 523.2875 <sup>+2</sup> | b <sub>10</sub> -H <sub>3</sub> PO <sub>4</sub> <sup>+2</sup> | 688.8803 <sup>+2</sup> | y <sub>12</sub> -H <sub>3</sub> PO <sub>4</sub> <sup>+2</sup> | 1015.486               | b <sub>9</sub>                                  | 1458.6876 | b <sub>13</sub>                                 |
| 344.1747 <sup>+2</sup> | y <sub>6</sub> -H <sub>3</sub> PO <sub>4</sub> <sup>+2</sup> | 557.2686 <sup>+2</sup> | y <sub>9</sub> <sup>+2</sup>                                  | 720.3927               | b <sub>7</sub>                                                | 1015.5531              | y <sub>9</sub> -H <sub>3</sub> PO <sub>4</sub>  | 1463.7853 | y <sub>13</sub> -H <sub>3</sub> PO <sub>4</sub> |
| 373.2082               | b <sub>4</sub>                                               | 572.2759 <sup>+2</sup> | b <sub>10</sub> <sup>+2</sup>                                 | 729.8474 <sup>+2</sup> | b <sub>13</sub> <sup>+2</sup>                                 | 1045.5677              | b <sub>10</sub> -H <sub>3</sub> PO <sub>4</sub> | 1474.7301 | y <sub>12</sub>                                 |
| 389.2143               | y <sub>3</sub>                                               | 573.8113 <sup>+2</sup> | b <sub>11</sub> -H <sub>3</sub> PO <sub>4</sub> <sup>+2</sup> | 732.3963 <sup>+2</sup> | y <sub>13</sub> -H <sub>3</sub> PO <sub>4</sub> <sup>+2</sup> | 1113.53                | y <sub>9</sub>                                  | 1534.8224 | MH-H <sub>3</sub> PO <sub>4</sub>               |
| 393.1631 <sup>+2</sup> | y <sub>6</sub> <sup>+2</sup>                                 | 581.8144 <sup>+2</sup> | y <sub>10</sub> -H <sub>3</sub> PO <sub>4</sub> <sup>+2</sup> | 737.8687 <sup>+2</sup> | y <sub>12</sub> <sup>+2</sup>                                 | 1143.5446              | b <sub>10</sub>                                 | 1561.7622 | y <sub>13</sub>                                 |
| 408.2221 <sup>+2</sup> | y <sub>7</sub> -H <sub>3</sub> PO <sub>4</sub> <sup>+2</sup> | 618.3206               | y <sub>5</sub>                                                | 767.9148 <sup>+2</sup> | MH-H <sub>3</sub> PO <sub>4</sub> <sup>+2</sup>               | 1146.6154              | b <sub>11</sub> -H <sub>3</sub> PO <sub>4</sub> | 1632.7993 | MH                                              |
| 424.7475 <sup>+2</sup> | b <sub>8</sub> <sup>+2</sup>                                 | 622.7998 <sup>+2</sup> | b <sub>11</sub> <sup>+2</sup>                                 | 781.3847 <sup>+2</sup> | y <sub>13</sub> <sup>+2</sup>                                 | 1162.6215              | y <sub>10</sub> -H <sub>3</sub> PO <sub>4</sub> |           |                                                 |

MS/MS Fragmentation of LDQPVSAPPsPR  
 Found in IPI00000634, Coiled-coil domain-containing protein 6

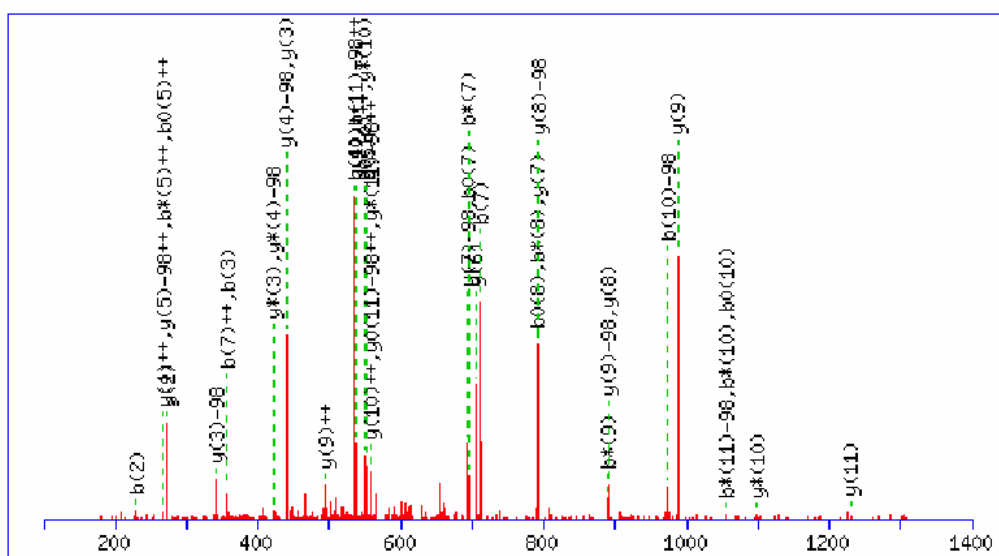

|                        |                                                              |                        |                                                              |                        |                                                               |           |                                                 |           |                                                 |
|------------------------|--------------------------------------------------------------|------------------------|--------------------------------------------------------------|------------------------|---------------------------------------------------------------|-----------|-------------------------------------------------|-----------|-------------------------------------------------|
| 88.0631 <sup>+2</sup>  | y <sub>1</sub> <sup>+2</sup>                                 | 341.1932               | y <sub>3</sub> -H <sub>3</sub> PO <sub>4</sub>               | 509.2774 <sup>+2</sup> | y <sub>10</sub> -H <sub>3</sub> PO <sub>4</sub> <sup>+2</sup> | 693.3678  | y <sub>7</sub> -H <sub>3</sub> PO <sub>4</sub>  | 1071.5469 | b <sub>11</sub> -H <sub>3</sub> PO <sub>4</sub> |
| 136.5895 <sup>+2</sup> | y <sub>2</sub> <sup>+2</sup>                                 | 347.1876 <sup>+2</sup> | y <sub>7</sub> -H <sub>3</sub> PO <sub>4</sub> <sup>+2</sup> | 535.2987               | y <sub>5</sub> -H <sub>3</sub> PO <sub>4</sub>                | 704.3127  | y <sub>6</sub>                                  | 1072.4711 | b <sub>10</sub>                                 |
| 171.1002 <sup>+2</sup> | y <sub>3</sub> -H <sub>3</sub> PO <sub>4</sub> <sup>+2</sup> | 352.6600 <sup>+2</sup> | y <sub>6</sub> <sup>+2</sup>                                 | 536.2228               | y <sub>4</sub>                                                | 711.3672  | b <sub>7</sub>                                  | 1115.5245 | y <sub>10</sub>                                 |
| 175.119                | y <sub>1</sub>                                               | 357.1769               | b <sub>3</sub>                                               | 553.298                | b <sub>5</sub>                                                | 791.3447  | y <sub>7</sub>                                  | 1132.5745 | y <sub>11</sub> -H <sub>3</sub> PO <sub>4</sub> |
| 219.6266 <sup>+2</sup> | y <sub>4</sub> -H <sub>3</sub> PO <sub>4</sub> <sup>+2</sup> | 396.1760 <sup>+2</sup> | y <sub>7</sub> <sup>+2</sup>                                 | 558.2659 <sup>+2</sup> | y <sub>10</sub> <sup>+2</sup>                                 | 792.4363  | y <sub>8</sub> -H <sub>3</sub> PO <sub>4</sub>  | 1169.5238 | b <sub>11</sub>                                 |
| 220.0887 <sup>+2</sup> | y <sub>3</sub> <sup>+2</sup>                                 | 396.7218 <sup>+2</sup> | y <sub>8</sub> -H <sub>3</sub> PO <sub>4</sub> <sup>+2</sup> | 566.7909 <sup>+2</sup> | y <sub>11</sub> -H <sub>3</sub> PO <sub>4</sub> <sup>+2</sup> | 808.4199  | b <sub>8</sub>                                  | 1230.5514 | y <sub>11</sub>                                 |
| 229.1183               | b <sub>2</sub>                                               | 438.2459               | y <sub>4</sub> -H <sub>3</sub> PO <sub>4</sub>               | 606.3358               | y <sub>6</sub> -H <sub>3</sub> PO <sub>4</sub>                | 889.489   | y <sub>9</sub> -H <sub>3</sub> PO <sub>4</sub>  | 1245.6586 | MH-H <sub>3</sub> PO <sub>4</sub>               |
| 268.1530 <sup>+2</sup> | y <sub>5</sub> -H <sub>3</sub> PO <sub>4</sub> <sup>+2</sup> | 439.1701               | y <sub>3</sub>                                               | 615.7794 <sup>+2</sup> | y <sub>11</sub> <sup>+2</sup>                                 | 890.4132  | y <sub>8</sub>                                  | 1343.6355 | MH                                              |
| 268.6151 <sup>+2</sup> | y <sub>4</sub> <sup>+2</sup>                                 | 445.2482 <sup>+2</sup> | y <sub>9</sub> -H <sub>3</sub> PO <sub>4</sub> <sup>+2</sup> | 623.3329 <sup>+2</sup> | MH-H <sub>3</sub> PO <sub>4</sub> <sup>+2</sup>               | 905.4727  | b <sub>9</sub>                                  |           |                                                 |
| 272.1717               | y <sub>2</sub>                                               | 445.7102 <sup>+2</sup> | y <sub>8</sub> <sup>+2</sup>                                 | 633.2756               | y <sub>5</sub>                                                | 974.4942  | b <sub>10</sub> -H <sub>3</sub> PO <sub>4</sub> |           |                                                 |
| 303.6715 <sup>+2</sup> | y <sub>6</sub> -H <sub>3</sub> PO <sub>4</sub> <sup>+2</sup> | 454.2296               | b <sub>4</sub>                                               | 640.3301               | b <sub>6</sub>                                                | 987.4659  | y <sub>9</sub>                                  |           |                                                 |
| 317.1414 <sup>+2</sup> | y <sub>5</sub> <sup>+2</sup>                                 | 494.2366 <sup>+2</sup> | y <sub>9</sub> <sup>+2</sup>                                 | 672.3214 <sup>+2</sup> | MH <sup>+2</sup>                                              | 1017.5476 | y <sub>10</sub> -H <sub>3</sub> PO <sub>4</sub> |           |                                                 |

MS/MS Fragmentation of ILQEKLDQPVsAPPsPR  
 Found in IPI00000634, Coiled-coil domain-containing protein 6

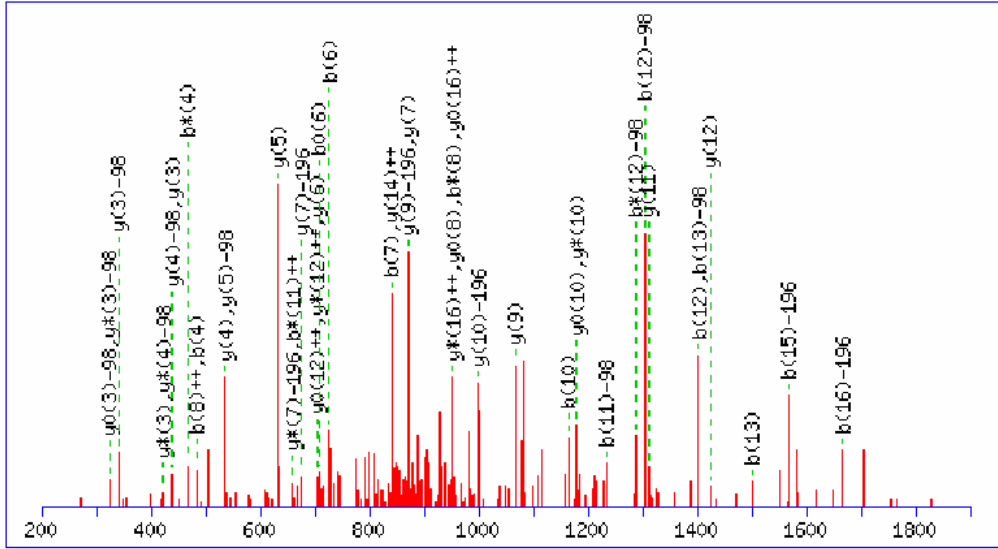

|                        |                                                               |                        |                                                                |                        |                                                                |                         |                                                               |           |                                                  |
|------------------------|---------------------------------------------------------------|------------------------|----------------------------------------------------------------|------------------------|----------------------------------------------------------------|-------------------------|---------------------------------------------------------------|-----------|--------------------------------------------------|
| 88.0631 <sup>+2</sup>  | y <sub>1</sub> <sup>+2</sup>                                  | 484.2766               | b <sub>4</sub>                                                 | 701.8525 <sup>+2</sup> | b <sub>12</sub> <sup>+2</sup>                                  | 904.9026 <sup>+2</sup>  | y <sub>15</sub> <sup>+2</sup>                                 | 1423.6018 | y <sub>12</sub>                                  |
| 136.5895 <sup>+2</sup> | y <sub>2</sub> <sup>+2</sup>                                  | 484.7742 <sup>+2</sup> | b <sub>8</sub> <sup>+2</sup>                                   | 704.3127               | y <sub>6</sub>                                                 | 912.4562 <sup>+2</sup>  | y <sub>16</sub> -H <sub>3</sub> PO <sub>4</sub> <sup>+2</sup> | 1453.7199 | y <sub>13</sub> -H <sub>3</sub> PO <sub>4</sub>  |
| 171.1002 <sup>+2</sup> | y <sub>3</sub> -H <sub>3</sub> PO <sub>4</sub> <sup>+2</sup>  | 485.2313 <sup>+2</sup> | y <sub>9</sub> -H <sub>3</sub> PO <sub>4</sub> <sup>+2</sup>   | 712.3046 <sup>+2</sup> | y <sub>12</sub> <sup>+2</sup>                                  | 930.9308 <sup>+2</sup>  | b <sub>16</sub> <sup>+2</sup>                                 | 1484.7856 | y <sub>14</sub> -2H <sub>3</sub> PO <sub>4</sub> |
| 175.119                | y <sub>1</sub>                                                | 485.6934 <sup>+2</sup> | y <sub>8</sub> <sup>+2</sup>                                   | 725.4556               | b <sub>6</sub>                                                 | 961.4447 <sup>+2</sup>  | y <sub>16</sub> <sup>+2</sup>                                 | 1498.8264 | b <sub>14</sub> -H <sub>3</sub> PO <sub>4</sub>  |
| 219.6266 <sup>+2</sup> | y <sub>4</sub> -H <sub>3</sub> PO <sub>4</sub> <sup>+2</sup>  | 500.2722 <sup>+2</sup> | y <sub>10</sub> -2H <sub>3</sub> PO <sub>4</sub> <sup>+2</sup> | 727.3636 <sup>+2</sup> | y <sub>13</sub> -H <sub>3</sub> PO <sub>4</sub> <sup>+2</sup>  | 968.5411                | b <sub>8</sub>                                                | 1499.7505 | b <sub>13</sub>                                  |
| 220.0887 <sup>+2</sup> | y <sub>3</sub> <sup>+2</sup>                                  | 533.3006 <sup>+2</sup> | b <sub>9</sub> <sup>+2</sup>                                   | 742.8964 <sup>+2</sup> | y <sub>14</sub> -2H <sub>3</sub> PO <sub>4</sub> <sup>+2</sup> | 968.9982 <sup>+2</sup>  | MH-H <sub>3</sub> PO <sub>4</sub> <sup>+2</sup>               | 1551.6968 | y <sub>13</sub>                                  |
| 227.1754               | b <sub>2</sub>                                                | 534.2198 <sup>+2</sup> | y <sub>9</sub> <sup>+2</sup>                                   | 749.9168 <sup>+2</sup> | b <sub>14</sub> -H <sub>3</sub> PO <sub>4</sub> <sup>+2</sup>  | 969.4554                | y <sub>9</sub> -H <sub>3</sub> PO <sub>4</sub>                | 1567.8479 | b <sub>15</sub> -2H <sub>3</sub> PO <sub>4</sub> |
| 268.1530 <sup>+2</sup> | y <sub>5</sub> -H <sub>3</sub> PO <sub>4</sub> <sup>+2</sup>  | 535.2987               | y <sub>5</sub> -H <sub>3</sub> PO <sub>4</sub>                 | 750.3789 <sup>+2</sup> | b <sub>13</sub> <sup>+2</sup>                                  | 970.3795                | y <sub>8</sub>                                                | 1582.7625 | y <sub>14</sub> -H <sub>3</sub> PO <sub>4</sub>  |
| 268.6151 <sup>+2</sup> | y <sub>4</sub> <sup>+2</sup>                                  | 536.2228               | y <sub>4</sub>                                                 | 773.3342               | y <sub>7</sub> -H <sub>3</sub> PO <sub>4</sub>                 | 999.537                 | y <sub>10</sub> -2H <sub>3</sub> PO <sub>4</sub>              | 1596.8033 | b <sub>14</sub>                                  |
| 272.1717               | y <sub>2</sub>                                                | 549.2606 <sup>+2</sup> | y <sub>10</sub> -H <sub>3</sub> PO <sub>4</sub> <sup>+2</sup>  | 774.4257               | y <sub>8</sub> -2H <sub>3</sub> PO <sub>4</sub>                | 1017.9867 <sup>+2</sup> | MH <sup>+2</sup>                                              | 1612.8442 | y <sub>15</sub> -2H <sub>3</sub> PO <sub>4</sub> |
| 303.6715 <sup>+2</sup> | y <sub>6</sub> -H <sub>3</sub> PO <sub>4</sub> <sup>+2</sup>  | 557.7856 <sup>+2</sup> | y <sub>11</sub> -2H <sub>3</sub> PO <sub>4</sub> <sup>+2</sup> | 776.3520 <sup>+2</sup> | y <sub>13</sub> <sup>+2</sup>                                  | 1065.5939               | b <sub>9</sub>                                                | 1664.9006 | b <sub>16</sub> -2H <sub>3</sub> PO <sub>4</sub> |
| 306.6894 <sup>+2</sup> | b <sub>2</sub> <sup>+2</sup>                                  | 582.8348 <sup>+2</sup> | b <sub>10</sub> <sup>+2</sup>                                  | 784.4276 <sup>+2</sup> | b <sub>15</sub> -2H <sub>3</sub> PO <sub>4</sub> <sup>+2</sup> | 1067.4323               | y <sub>9</sub>                                                | 1665.8248 | b <sub>15</sub> -H <sub>3</sub> PO <sub>4</sub>  |
| 317.1414 <sup>+2</sup> | y <sub>5</sub> <sup>+2</sup>                                  | 598.2491 <sup>+2</sup> | y <sub>10</sub> <sup>+2</sup>                                  | 791.8849 <sup>+2</sup> | y <sub>14</sub> -H <sub>3</sub> PO <sub>4</sub> <sup>+2</sup>  | 1097.5139               | y <sub>10</sub> -H <sub>3</sub> PO <sub>4</sub>               | 1680.7394 | y <sub>14</sub>                                  |
| 338.1823 <sup>+2</sup> | y <sub>7</sub> -2H <sub>3</sub> PO <sub>4</sub> <sup>+2</sup> | 606.3358               | y <sub>6</sub> -H <sub>3</sub> PO <sub>4</sub>                 | 798.9053 <sup>+2</sup> | b <sub>14</sub> <sup>+2</sup>                                  | 1114.564                | y <sub>11</sub> -2H <sub>3</sub> PO <sub>4</sub>              | 1710.8211 | y <sub>15</sub> -H <sub>3</sub> PO <sub>4</sub>  |
| 341.1932               | y <sub>3</sub> -H <sub>3</sub> PO <sub>4</sub>                | 606.7741 <sup>+2</sup> | y <sub>11</sub> -H <sub>3</sub> PO <sub>4</sub> <sup>+2</sup>  | 806.9257 <sup>+2</sup> | y <sub>15</sub> -2H <sub>3</sub> PO <sub>4</sub> <sup>+2</sup> | 1164.6623               | b <sub>10</sub>                                               | 1725.9282 | y <sub>16</sub> -2H <sub>3</sub> PO <sub>4</sub> |
| 352.6600 <sup>+2</sup> | y <sub>6</sub> <sup>+2</sup>                                  | 612.3715               | b <sub>5</sub>                                                 | 832.9540 <sup>+2</sup> | b <sub>16</sub> -2H <sub>3</sub> PO <sub>4</sub> <sup>+2</sup> | 1195.4908               | y <sub>10</sub>                                               | 1762.8775 | b <sub>16</sub> -H <sub>3</sub> PO <sub>4</sub>  |
| 355.234                | b <sub>3</sub>                                                | 614.3277 <sup>+2</sup> | y <sub>12</sub> -2H <sub>3</sub> PO <sub>4</sub> <sup>+2</sup> | 833.4160 <sup>+2</sup> | b <sub>15</sub> -H <sub>3</sub> PO <sub>4</sub> <sup>+2</sup>  | 1212.5409               | y <sub>11</sub> -H <sub>3</sub> PO <sub>4</sub>               | 1763.8017 | b <sub>15</sub>                                  |
| 363.2314 <sup>+2</sup> | b <sub>6</sub> <sup>+2</sup>                                  | 617.3455 <sup>+2</sup> | b <sub>11</sub> -H <sub>3</sub> PO <sub>4</sub> <sup>+2</sup>  | 840.4825               | b <sub>7</sub>                                                 | 1227.648                | y <sub>12</sub> -2H <sub>3</sub> PO <sub>4</sub>              | 1808.798  | y <sub>15</sub>                                  |
| 387.1707 <sup>+2</sup> | y <sub>7</sub> -H <sub>3</sub> PO <sub>4</sub> <sup>+2</sup>  | 633.2756               | y <sub>5</sub>                                                 | 840.8733 <sup>+2</sup> | y <sub>14</sub> <sup>+2</sup>                                  | 1233.6838               | b <sub>11</sub> -H <sub>3</sub> PO <sub>4</sub>               | 1823.9051 | y <sub>16</sub> -H <sub>3</sub> PO <sub>4</sub>  |
| 387.7165 <sup>+2</sup> | y <sub>8</sub> -2H <sub>3</sub> PO <sub>4</sub> <sup>+2</sup> | 652.8641 <sup>+2</sup> | b <sub>12</sub> -H <sub>3</sub> PO <sub>4</sub> <sup>+2</sup>  | 855.9142 <sup>+2</sup> | y <sub>15</sub> -H <sub>3</sub> PO <sub>4</sub> <sup>+2</sup>  | 1304.7209               | b <sub>12</sub> -H <sub>3</sub> PO <sub>4</sub>               | 1860.8544 | b <sub>16</sub>                                  |
| 420.7449 <sup>+2</sup> | b <sub>7</sub> <sup>+2</sup>                                  | 655.7625 <sup>+2</sup> | y <sub>11</sub> <sup>+2</sup>                                  | 863.4678 <sup>+2</sup> | y <sub>16</sub> -2H <sub>3</sub> PO <sub>4</sub> <sup>+2</sup> | 1310.5178               | y <sub>11</sub>                                               | 1921.882  | y <sub>16</sub>                                  |
| 436.1592 <sup>+2</sup> | y <sub>7</sub> <sup>+2</sup>                                  | 663.3161 <sup>+2</sup> | y <sub>12</sub> -H <sub>3</sub> PO <sub>4</sub> <sup>+2</sup>  | 871.3111               | y <sub>7</sub>                                                 | 1325.6249               | y <sub>12</sub> -H <sub>3</sub> PO <sub>4</sub>               | 1936.9892 | MH-H <sub>3</sub> PO <sub>4</sub>                |
| 436.2429 <sup>+2</sup> | y <sub>9</sub> -2H <sub>3</sub> PO <sub>4</sub> <sup>+2</sup> | 666.3340 <sup>+2</sup> | b <sub>11</sub> <sup>+2</sup>                                  | 871.4785               | y <sub>9</sub> -2H <sub>3</sub> PO <sub>4</sub>                | 1331.6607               | b <sub>11</sub>                                               | 2034.9661 | MH                                               |
| 436.7049 <sup>+2</sup> | y <sub>8</sub> -H <sub>3</sub> PO <sub>4</sub> <sup>+2</sup>  | 675.3573               | y <sub>7</sub> -2H <sub>3</sub> PO <sub>4</sub>                | 872.4026               | y <sub>8</sub> -H <sub>3</sub> PO <sub>4</sub>                 | 1355.743                | y <sub>13</sub> -2H <sub>3</sub> PO <sub>4</sub>              |           |                                                  |
| 438.2459               | y <sub>4</sub> -H <sub>3</sub> PO <sub>4</sub>                | 678.3751 <sup>+2</sup> | y <sub>13</sub> -2H <sub>3</sub> PO <sub>4</sub> <sup>+2</sup> | 881.9424 <sup>+2</sup> | b <sub>16</sub> -H <sub>3</sub> PO <sub>4</sub> <sup>+2</sup>  | 1401.7736               | b <sub>13</sub> -H <sub>3</sub> PO <sub>4</sub>               |           |                                                  |
| 439.1701               | y <sub>3</sub>                                                | 701.3905 <sup>+2</sup> | b <sub>13</sub> -H <sub>3</sub> PO <sub>4</sub> <sup>+2</sup>  | 882.4045 <sup>+2</sup> | b <sub>15</sub> <sup>+2</sup>                                  | 1402.6978               | b <sub>12</sub>                                               |           |                                                  |

MS/MS Fragmentation of IKTEPsPLSDPSDIIR  
 Found in IPI00008137, Zinc finger protein 295

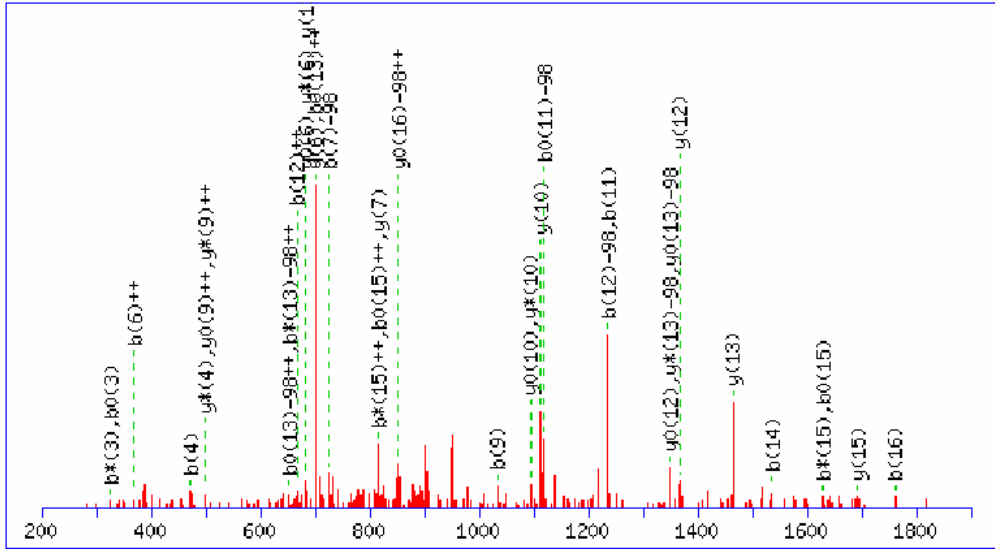

|                        |                                                              |                        |                                                               |                        |                                                               |                        |                                                               |           |                                                 |
|------------------------|--------------------------------------------------------------|------------------------|---------------------------------------------------------------|------------------------|---------------------------------------------------------------|------------------------|---------------------------------------------------------------|-----------|-------------------------------------------------|
| 88.0631 <sup>+2</sup>  | y <sub>1</sub> <sup>+2</sup>                                 | 412.1835 <sup>+2</sup> | b <sub>7</sub> <sup>+2</sup>                                  | 666.8078 <sup>+2</sup> | b <sub>12</sub> <sup>+2</sup>                                 | 862.4467 <sup>+2</sup> | y <sub>16</sub> -H <sub>3</sub> PO <sub>4</sub> <sup>+2</sup> | 1365.7009 | y <sub>13</sub> -H <sub>3</sub> PO <sub>4</sub> |
| 121.5968 <sup>+2</sup> | b <sub>2</sub> <sup>+2</sup>                                 | 451.7325 <sup>+2</sup> | y <sub>8</sub> <sup>+2</sup>                                  | 683.3541 <sup>+2</sup> | y <sub>13</sub> -H <sub>3</sub> PO <sub>4</sub> <sup>+2</sup> | 880.9213 <sup>+2</sup> | b <sub>16</sub> <sup>+2</sup>                                 | 1366.625  | y <sub>12</sub>                                 |
| 144.6051 <sup>+2</sup> | y <sub>2</sub> <sup>+2</sup>                                 | 460.7099 <sup>+2</sup> | b <sub>8</sub> <sup>+2</sup>                                  | 683.8161 <sup>+2</sup> | y <sub>12</sub> <sup>+2</sup>                                 | 902.4578               | y <sub>8</sub>                                                | 1419.6403 | b <sub>13</sub>                                 |
| 172.1206 <sup>+2</sup> | b <sub>3</sub> <sup>+2</sup>                                 | 468.2635 <sup>+2</sup> | b <sub>9</sub> -H <sub>3</sub> PO <sub>4</sub> <sup>+2</sup>  | 700.3988               | y <sub>6</sub>                                                | 911.4351 <sup>+2</sup> | y <sub>16</sub> <sup>+2</sup>                                 | 1436.6904 | b <sub>14</sub> -H <sub>3</sub> PO <sub>4</sub> |
| 175.119                | y <sub>1</sub>                                               | 472.2766               | b <sub>4</sub>                                                | 710.3238 <sup>+2</sup> | b <sub>13</sub> <sup>+2</sup>                                 | 918.9887 <sup>+2</sup> | MH-H <sub>3</sub> PO <sub>4</sub> <sup>+2</sup>               | 1463.6778 | y <sub>13</sub>                                 |
| 201.1472 <sup>+2</sup> | y <sub>3</sub> <sup>+2</sup>                                 | 508.2746 <sup>+2</sup> | y <sub>9</sub> <sup>+2</sup>                                  | 718.8488 <sup>+2</sup> | b <sub>14</sub> -H <sub>3</sub> PO <sub>4</sub> <sup>+2</sup> | 920.4125               | b <sub>8</sub>                                                | 1494.7435 | y <sub>14</sub> -H <sub>3</sub> PO <sub>4</sub> |
| 236.6419 <sup>+2</sup> | b <sub>4</sub> <sup>+2</sup>                                 | 511.7795 <sup>+2</sup> | b <sub>10</sub> -H <sub>3</sub> PO <sub>4</sub> <sup>+2</sup> | 725.3828               | b <sub>7</sub> -H <sub>3</sub> PO <sub>4</sub>                | 935.5197               | b <sub>9</sub> -H <sub>3</sub> PO <sub>4</sub>                | 1534.6673 | b <sub>14</sub>                                 |
| 242.1863               | b <sub>2</sub>                                               | 516.314                | y <sub>4</sub>                                                | 732.3425 <sup>+2</sup> | y <sub>13</sub> <sup>+2</sup>                                 | 967.9772 <sup>+2</sup> | MH <sup>+2</sup>                                              | 1549.7744 | b <sub>15</sub> -H <sub>3</sub> PO <sub>4</sub> |
| 258.6606 <sup>+2</sup> | y <sub>4</sub> <sup>+2</sup>                                 | 517.2519 <sup>+2</sup> | b <sub>9</sub> <sup>+2</sup>                                  | 736.3277               | b <sub>6</sub>                                                | 1015.5419              | y <sub>9</sub>                                                | 1592.7204 | y <sub>14</sub>                                 |
| 285.1683 <sup>+2</sup> | b <sub>5</sub> <sup>+2</sup>                                 | 556.8009 <sup>+2</sup> | y <sub>10</sub> <sup>+2</sup>                                 | 747.8754 <sup>+2</sup> | y <sub>14</sub> -H <sub>3</sub> PO <sub>4</sub> <sup>+2</sup> | 1022.5517              | b <sub>10</sub> -H <sub>3</sub> PO <sub>4</sub>               | 1595.7911 | y <sub>15</sub> -H <sub>3</sub> PO <sub>4</sub> |
| 288.203                | y <sub>2</sub>                                               | 560.7679 <sup>+2</sup> | b <sub>10</sub> <sup>+2</sup>                                 | 767.8373 <sup>+2</sup> | b <sub>14</sub> <sup>+2</sup>                                 | 1033.4966              | b <sub>9</sub>                                                | 1647.7513 | b <sub>15</sub>                                 |
| 302.1767 <sup>+2</sup> | y <sub>5</sub> <sup>+2</sup>                                 | 569.2930 <sup>+2</sup> | b <sub>11</sub> -H <sub>3</sub> PO <sub>4</sub> <sup>+2</sup> | 775.3909 <sup>+2</sup> | b <sub>15</sub> -H <sub>3</sub> PO <sub>4</sub> <sup>+2</sup> | 1112.5946              | y <sub>10</sub>                                               | 1662.8585 | b <sub>16</sub> -H <sub>3</sub> PO <sub>4</sub> |
| 319.6790 <sup>+2</sup> | b <sub>6</sub> -H <sub>3</sub> PO <sub>4</sub> <sup>+2</sup> | 569.3293               | b <sub>5</sub>                                                | 796.8638 <sup>+2</sup> | y <sub>14</sub> <sup>+2</sup>                                 | 1120.5286              | b <sub>10</sub>                                               | 1693.768  | y <sub>15</sub>                                 |
| 343.234                | b <sub>3</sub>                                               | 600.3170 <sup>+2</sup> | y <sub>11</sub> <sup>+2</sup>                                 | 798.3992 <sup>+2</sup> | y <sub>15</sub> -H <sub>3</sub> PO <sub>4</sub> <sup>+2</sup> | 1137.5786              | b <sub>11</sub> -H <sub>3</sub> PO <sub>4</sub>               | 1723.8861 | y <sub>16</sub> -H <sub>3</sub> PO <sub>4</sub> |
| 350.7030 <sup>+2</sup> | y <sub>6</sub> <sup>+2</sup>                                 | 603.3461               | y <sub>5</sub>                                                | 815.4258               | y <sub>7</sub>                                                | 1199.6266              | y <sub>11</sub>                                               | 1760.8354 | b <sub>16</sub>                                 |
| 363.1951 <sup>+2</sup> | b <sub>7</sub> -H <sub>3</sub> PO <sub>4</sub> <sup>+2</sup> | 617.8193 <sup>+2</sup> | b <sub>12</sub> -H <sub>3</sub> PO <sub>4</sub> <sup>+2</sup> | 822.4356               | b <sub>8</sub> -H <sub>3</sub> PO <sub>4</sub>                | 1234.6314              | b <sub>12</sub> -H <sub>3</sub> PO <sub>4</sub>               | 1821.863  | y <sub>16</sub>                                 |
| 368.6675 <sup>+2</sup> | b <sub>6</sub> <sup>+2</sup>                                 | 618.2814 <sup>+2</sup> | b <sub>11</sub> <sup>+2</sup>                                 | 823.3597               | b <sub>7</sub>                                                | 1235.5555              | b <sub>11</sub>                                               | 1836.9702 | MH-H <sub>3</sub> PO <sub>4</sub>               |
| 401.2871               | y <sub>3</sub>                                               | 634.8277 <sup>+2</sup> | y <sub>12</sub> -H <sub>3</sub> PO <sub>4</sub> <sup>+2</sup> | 824.3793 <sup>+2</sup> | b <sub>15</sub> <sup>+2</sup>                                 | 1268.6481              | y <sub>12</sub> -H <sub>3</sub> PO <sub>4</sub>               | 1934.9471 | MH                                              |
| 408.2165 <sup>+2</sup> | y <sub>7</sub> <sup>+2</sup>                                 | 638.3508               | b <sub>6</sub> -H <sub>3</sub> PO <sub>4</sub>                | 831.9329 <sup>+2</sup> | b <sub>16</sub> -H <sub>3</sub> PO <sub>4</sub> <sup>+2</sup> | 1321.6634              | b <sub>13</sub> -H <sub>3</sub> PO <sub>4</sub>               |           |                                                 |
| 411.7214 <sup>+2</sup> | b <sub>8</sub> -H <sub>3</sub> PO <sub>4</sub> <sup>+2</sup> | 661.3353 <sup>+2</sup> | b <sub>13</sub> -H <sub>3</sub> PO <sub>4</sub> <sup>+2</sup> | 847.3877 <sup>+2</sup> | y <sub>15</sub> <sup>+2</sup>                                 | 1332.6083              | b <sub>12</sub>                                               |           |                                                 |



MS/MS Fragmentation of IQPLEPDsPTGLSENPTPATEK  
 Found in IPI00008137, Zinc finger protein 295

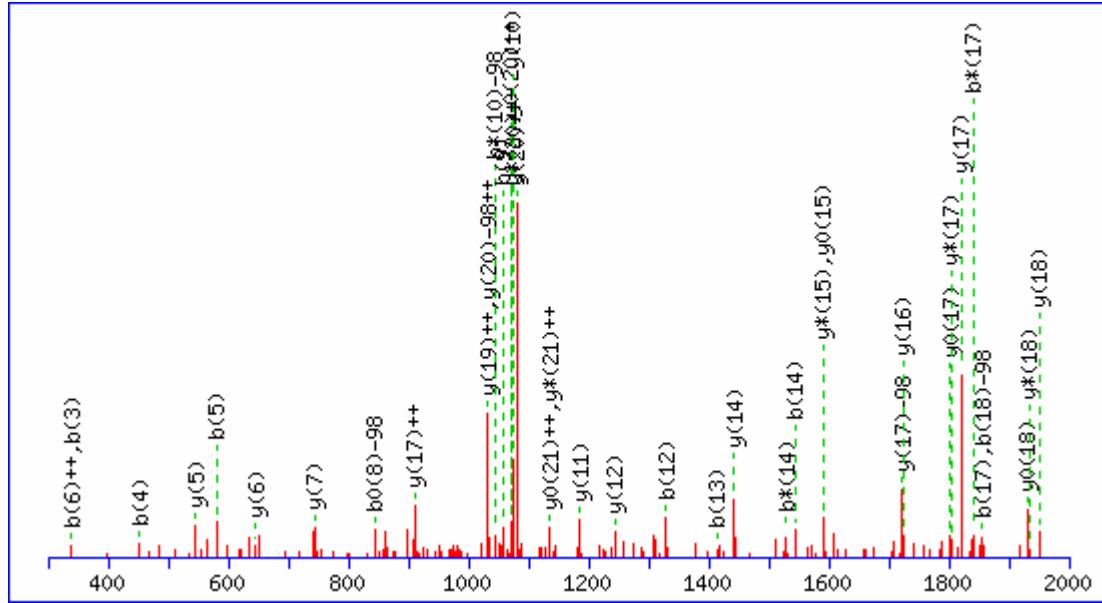

|                        |                               |                        |                                                               |                         |                                                               |           |                                                 |           |                                                 |
|------------------------|-------------------------------|------------------------|---------------------------------------------------------------|-------------------------|---------------------------------------------------------------|-----------|-------------------------------------------------|-----------|-------------------------------------------------|
| 74.0600 <sup>+2</sup>  | y <sub>1</sub> <sup>+2</sup>  | 593.8011 <sup>+2</sup> | y <sub>11</sub> <sup>+2</sup>                                 | 975.4224 <sup>+2</sup>  | y <sub>18</sub> <sup>+2</sup>                                 | 1317.6685 | b <sub>13</sub> -H <sub>3</sub> PO <sub>4</sub> | 1855.9072 | b <sub>18</sub> -H <sub>3</sub> PO <sub>4</sub> |
| 138.5813 <sup>+2</sup> | y <sub>2</sub> <sup>+2</sup>  | 622.3119 <sup>+2</sup> | y <sub>12</sub> <sup>+2</sup>                                 | 982.9760 <sup>+2</sup>  | y <sub>19</sub> -H <sub>3</sub> PO <sub>4</sub> <sup>+2</sup> | 1328.6134 | b <sub>12</sub>                                 | 1856.8314 | b <sub>17</sub>                                 |
| 147.1128               | y <sub>1</sub>                | 646.3406               | y <sub>6</sub>                                                | 986.4789                | y <sub>9</sub>                                                | 1344.6642 | y <sub>13</sub>                                 | 1926.9443 | b <sub>19</sub> -H <sub>3</sub> PO <sub>4</sub> |
| 189.1052 <sup>+2</sup> | y <sub>3</sub> <sup>+2</sup>  | 672.8357 <sup>+2</sup> | y <sub>13</sub> <sup>+2</sup>                                 | 1031.5024 <sup>+2</sup> | y <sub>20</sub> -H <sub>3</sub> PO <sub>4</sub> <sup>+2</sup> | 1415.6454 | b <sub>13</sub>                                 | 1949.8376 | y <sub>18</sub>                                 |
| 224.6237 <sup>+2</sup> | y <sub>4</sub> <sup>+2</sup>  | 678.3821               | b <sub>6</sub>                                                | 1031.9645 <sup>+2</sup> | y <sub>19</sub> <sup>+2</sup>                                 | 1441.7169 | y <sub>14</sub>                                 | 1953.8841 | b <sub>18</sub>                                 |
| 242.1499               | b <sub>2</sub>                | 721.3621 <sup>+2</sup> | y <sub>14</sub> <sup>+2</sup>                                 | 1057.4602               | b <sub>9</sub>                                                | 1446.7111 | b <sub>14</sub> -H <sub>3</sub> PO <sub>4</sub> | 1964.9447 | y <sub>19</sub> -H <sub>3</sub> PO <sub>4</sub> |
| 273.1501 <sup>+2</sup> | y <sub>5</sub> <sup>+2</sup>  | 743.3934               | y <sub>7</sub>                                                | 1060.531                | b <sub>10</sub> -H <sub>3</sub> PO <sub>4</sub>               | 1510.7384 | y <sub>15</sub> -H <sub>3</sub> PO <sub>4</sub> | 2024.9212 | b <sub>19</sub>                                 |
| 276.1554               | y <sub>2</sub>                | 755.8728 <sup>+2</sup> | y <sub>15</sub> -H <sub>3</sub> PO <sub>4</sub> <sup>+2</sup> | 1073.5109               | y <sub>10</sub>                                               | 1544.688  | b <sub>14</sub>                                 | 2027.992  | b <sub>20</sub> -H <sub>3</sub> PO <sub>4</sub> |
| 323.6740 <sup>+2</sup> | y <sub>6</sub> <sup>+2</sup>  | 793.409                | b <sub>7</sub>                                                | 1080.4908 <sup>+2</sup> | y <sub>20</sub> <sup>+2</sup>                                 | 1560.754  | b <sub>15</sub> -H <sub>3</sub> PO <sub>4</sub> | 2061.9975 | y <sub>20</sub> -H <sub>3</sub> PO <sub>4</sub> |
| 339.2027               | b <sub>3</sub>                | 804.8613 <sup>+2</sup> | y <sub>15</sub> <sup>+2</sup>                                 | 1095.5317 <sup>+2</sup> | y <sub>21</sub> -H <sub>3</sub> PO <sub>4</sub> <sup>+2</sup> | 1608.7153 | y <sub>15</sub>                                 | 2062.9216 | y <sub>19</sub>                                 |
| 372.2003 <sup>+2</sup> | y <sub>7</sub> <sup>+2</sup>  | 813.3863 <sup>+2</sup> | y <sub>16</sub> -H <sub>3</sub> PO <sub>4</sub> <sup>+2</sup> | 1117.5524               | b <sub>11</sub> -H <sub>3</sub> PO <sub>4</sub>               | 1625.7653 | y <sub>16</sub> -H <sub>3</sub> PO <sub>4</sub> | 2125.9689 | b <sub>20</sub>                                 |
| 377.2031               | y <sub>3</sub>                | 857.4363               | y <sub>8</sub>                                                | 1144.5201 <sup>+2</sup> | y <sub>21</sub> <sup>+2</sup>                                 | 1657.8068 | b <sub>16</sub> -H <sub>3</sub> PO <sub>4</sub> | 2157.0346 | b <sub>21</sub> -H <sub>3</sub> PO <sub>4</sub> |
| 429.2218 <sup>+2</sup> | y <sub>8</sub> <sup>+2</sup>  | 861.9127 <sup>+2</sup> | y <sub>17</sub> -H <sub>3</sub> PO <sub>4</sub> <sup>+2</sup> | 1152.0737 <sup>+2</sup> | MH-H <sub>3</sub> PO <sub>4</sub> <sup>+2</sup>               | 1658.7309 | b <sub>15</sub>                                 | 2159.9744 | y <sub>20</sub>                                 |
| 448.2402               | y <sub>4</sub>                | 862.3747 <sup>+2</sup> | y <sub>16</sub> <sup>+2</sup>                                 | 1158.5078               | b <sub>10</sub>                                               | 1722.8181 | y <sub>17</sub> -H <sub>3</sub> PO <sub>4</sub> | 2190.0561 | y <sub>21</sub> -H <sub>3</sub> PO <sub>4</sub> |
| 452.2867               | b <sub>4</sub>                | 862.4305               | b <sub>8</sub> -H <sub>3</sub> PO <sub>4</sub>                | 1186.595                | y <sub>11</sub>                                               | 1723.7422 | y <sub>16</sub>                                 | 2255.0115 | b <sub>21</sub>                                 |
| 493.7431 <sup>+2</sup> | y <sub>9</sub> <sup>+2</sup>  | 910.9011 <sup>+2</sup> | y <sub>17</sub> <sup>+2</sup>                                 | 1201.0622 <sup>+2</sup> | MH <sup>+2</sup>                                              | 1755.7837 | b <sub>16</sub>                                 | 2288.033  | y <sub>21</sub>                                 |
| 537.2591 <sup>+2</sup> | y <sub>10</sub> <sup>+2</sup> | 926.4340 <sup>+2</sup> | y <sub>18</sub> -H <sub>3</sub> PO <sub>4</sub> <sup>+2</sup> | 1215.5293               | b <sub>11</sub>                                               | 1758.8545 | b <sub>17</sub> -H <sub>3</sub> PO <sub>4</sub> | 2303.1401 | MH-H <sub>3</sub> PO <sub>4</sub>               |
| 545.293                | y <sub>5</sub>                | 959.4833               | b <sub>9</sub> -H <sub>3</sub> PO <sub>4</sub>                | 1230.6365               | b <sub>12</sub> -H <sub>3</sub> PO <sub>4</sub>               | 1820.795  | y <sub>17</sub>                                 | 2401.117  | MH                                              |
| 581.3293               | b <sub>5</sub>                | 960.4074               | b <sub>8</sub>                                                | 1243.6165               | y <sub>12</sub>                                               | 1851.8607 | y <sub>18</sub> -H <sub>3</sub> PO <sub>4</sub> |           |                                                 |

MS/MS Fragmentation of NQsLGQSAPSLTAGLK  
 Found in IPI00480046, Isoform 2 of Microtubule-associated serine/threonine-protein kinase 2

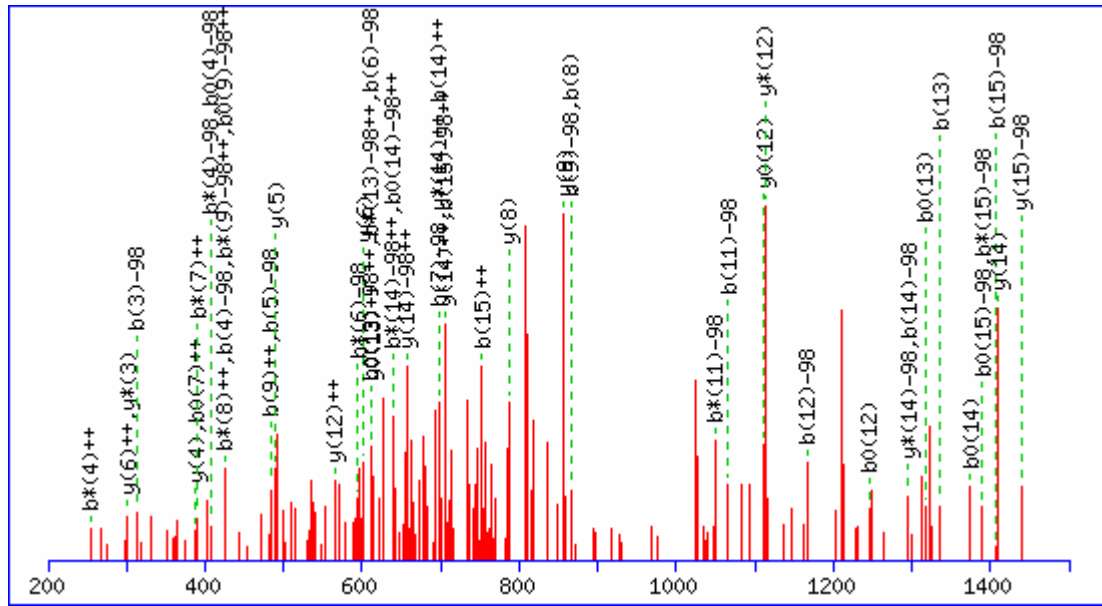

|                        |                                                |                        |                                                |                        |                                                               |           |                                                 |           |                                                 |
|------------------------|------------------------------------------------|------------------------|------------------------------------------------|------------------------|---------------------------------------------------------------|-----------|-------------------------------------------------|-----------|-------------------------------------------------|
| 74.0600 <sup>+2</sup>  | y <sub>1</sub> <sup>+2</sup>                   | 393.7396 <sup>+2</sup> | y <sub>8</sub> <sup>+2</sup>                   | 621.8563 <sup>+2</sup> | y <sub>13</sub> <sup>+2</sup>                                 | 857.5091  | y <sub>9</sub>                                  | 1242.7052 | y <sub>13</sub>                                 |
| 130.6021 <sup>+2</sup> | y <sub>2</sub> <sup>+2</sup>                   | 410.1071               | b <sub>3</sub>                                 | 656.3670 <sup>+2</sup> | y <sub>14</sub> -H <sub>3</sub> PO <sub>4</sub> <sup>+2</sup> | 865.4163  | b <sub>9</sub> -H <sub>3</sub> PO <sub>4</sub>  | 1264.5569 | b <sub>12</sub>                                 |
| 147.1128               | y <sub>1</sub>                                 | 425.2143               | b <sub>4</sub> -H <sub>3</sub> PO <sub>4</sub> | 689.4192               | y <sub>7</sub>                                                | 866.3404  | b <sub>8</sub>                                  | 1294.6386 | b <sub>14</sub> -H <sub>3</sub> PO <sub>4</sub> |
| 159.1128 <sup>+2</sup> | y <sub>3</sub> <sup>+2</sup>                   | 429.2582 <sup>+2</sup> | y <sub>9</sub> <sup>+2</sup>                   | 697.3264               | b <sub>7</sub> -H <sub>3</sub> PO <sub>4</sub>                | 944.5411  | y <sub>10</sub>                                 | 1311.7267 | y <sub>14</sub> -H <sub>3</sub> PO <sub>4</sub> |
| 194.6314 <sup>+2</sup> | y <sub>4</sub> <sup>+2</sup>                   | 472.7742 <sup>+2</sup> | y <sub>10</sub> <sup>+2</sup>                  | 705.3554 <sup>+2</sup> | y <sub>14</sub> <sup>+2</sup>                                 | 952.4483  | b <sub>10</sub> -H <sub>3</sub> PO <sub>4</sub> | 1335.594  | b <sub>13</sub>                                 |
| 243.1088               | b <sub>2</sub>                                 | 482.2358               | b <sub>5</sub> -H <sub>3</sub> PO <sub>4</sub> | 708.2712               | b <sub>6</sub>                                                | 963.3932  | b <sub>9</sub>                                  | 1392.6155 | b <sub>14</sub>                                 |
| 245.1552 <sup>+2</sup> | y <sub>5</sub> <sup>+2</sup>                   | 489.3031               | y <sub>5</sub>                                 | 720.3963 <sup>+2</sup> | y <sub>15</sub> -H <sub>3</sub> PO <sub>4</sub> <sup>+2</sup> | 1050.4252 | b <sub>10</sub>                                 | 1407.7227 | b <sub>15</sub> -H <sub>3</sub> PO <sub>4</sub> |
| 260.1969               | y <sub>2</sub>                                 | 523.1912               | b <sub>4</sub>                                 | 768.3635               | b <sub>8</sub> -H <sub>3</sub> PO <sub>4</sub>                | 1065.5323 | b <sub>11</sub> -H <sub>3</sub> PO <sub>4</sub> | 1409.7036 | y <sub>14</sub>                                 |
| 301.6972 <sup>+2</sup> | y <sub>6</sub> <sup>+2</sup>                   | 536.8035 <sup>+2</sup> | y <sub>11</sub> <sup>+2</sup>                  | 769.3847 <sup>+2</sup> | y <sub>15</sub> <sup>+2</sup>                                 | 1072.5997 | y <sub>11</sub>                                 | 1439.7853 | y <sub>15</sub> -H <sub>3</sub> PO <sub>4</sub> |
| 312.1302               | b <sub>3</sub> -H <sub>3</sub> PO <sub>4</sub> | 565.3142 <sup>+2</sup> | y <sub>12</sub> <sup>+2</sup>                  | 777.4177 <sup>+2</sup> | MH-H <sub>3</sub> PO <sub>4</sub> <sup>+2</sup>               | 1129.6212 | y <sub>12</sub>                                 | 1505.6996 | b <sub>15</sub>                                 |
| 317.2183               | y <sub>3</sub>                                 | 580.2127               | b <sub>5</sub>                                 | 786.472                | y <sub>8</sub>                                                | 1163.5092 | b <sub>11</sub>                                 | 1537.7622 | y <sub>15</sub>                                 |
| 345.2132 <sup>+2</sup> | y <sub>7</sub> <sup>+2</sup>                   | 602.3872               | y <sub>6</sub>                                 | 795.3033               | b <sub>7</sub>                                                | 1166.58   | b <sub>12</sub> -H <sub>3</sub> PO <sub>4</sub> | 1553.8282 | MH-H <sub>3</sub> PO <sub>4</sub>               |
| 388.2554               | y <sub>4</sub>                                 | 610.2944               | b <sub>6</sub> -H <sub>3</sub> PO <sub>4</sub> | 826.4062 <sup>+2</sup> | MH <sup>+2</sup>                                              | 1237.6171 | b <sub>13</sub> -H <sub>3</sub> PO <sub>4</sub> | 1651.8051 | MH                                              |

MS/MS Fragmentation of LPIFSRLsISDD  
 Found in IPI00026947, Butyrate response factor 2

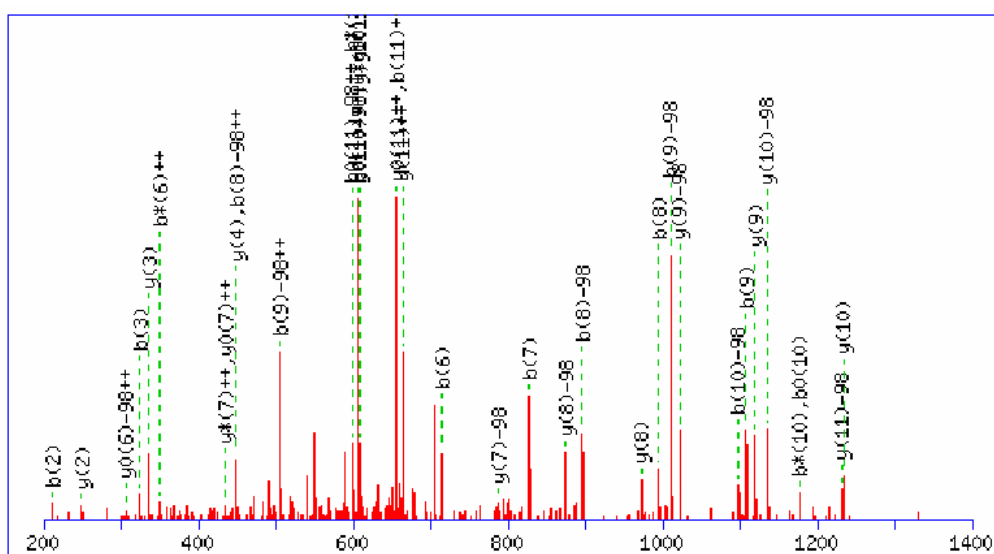

|                        |                                  |                        |                                     |                        |                                        |           |                                |           |                                   |
|------------------------|----------------------------------|------------------------|-------------------------------------|------------------------|----------------------------------------|-----------|--------------------------------|-----------|-----------------------------------|
| 134.0448               | $y_1$                            | 471.2966               | $b_4$                               | 606.3428 <sup>+2</sup> | $b_{11}\text{-H}_3\text{PO}_4^{+2}$    | 827.5138  | $b_7$                          | 1194.6282 | $b_{10}$                          |
| 211.1441               | $b_2$                            | 486.7053 <sup>+2</sup> | $y_8^{+2}$                          | 616.1862               | $y_5$                                  | 874.4265  | $y_8\text{-H}_3\text{PO}_4$    | 1211.6783 | $b_{11}\text{-H}_3\text{PO}_4$    |
| 249.0717               | $y_2$                            | 497.7597 <sup>+2</sup> | $b_8^{+2}$                          | 616.3195 <sup>+2</sup> | $y_{11}\text{-H}_3\text{PO}_4^{+2}$    | 885.3714  | $y_7$                          | 1231.6317 | $y_{11}\text{-H}_3\text{PO}_4$    |
| 324.2282               | $b_3$                            | 505.3133 <sup>+2</sup> | $b_9\text{-H}_3\text{PO}_4^{+2}$    | 616.7816 <sup>+2</sup> | $y_{10}^{+2}$                          | 896.5352  | $b_8\text{-H}_3\text{PO}_4$    | 1232.5559 | $y_{10}$                          |
| 336.1038               | $y_3$                            | 511.2511 <sup>+2</sup> | $y_9\text{-H}_3\text{PO}_4^{+2}$    | 631.2933               | $y_6\text{-H}_3\text{PO}_4$            | 972.4034  | $y_8$                          | 1309.6552 | $b_{11}$                          |
| 357.7185 <sup>+2</sup> | $b_6^{+2}$                       | 518.2093               | $y_5\text{-H}_3\text{PO}_4$         | 655.3312 <sup>+2</sup> | $b_{11}^{+2}$                          | 994.5121  | $b_8$                          | 1329.6086 | $y_{11}$                          |
| 394.2009 <sup>+2</sup> | $y_7\text{-H}_3\text{PO}_4^{+2}$ | 548.8293 <sup>+2</sup> | $b_{10}\text{-H}_3\text{PO}_4^{+2}$ | 665.3080 <sup>+2</sup> | $y_{11}^{+2}$                          | 1009.6193 | $b_9\text{-H}_3\text{PO}_4$    | 1344.7158 | $\text{MH}\text{-H}_3\text{PO}_4$ |
| 414.2605 <sup>+2</sup> | $b_7^{+2}$                       | 554.3017 <sup>+2</sup> | $b_9^{+2}$                          | 672.8615 <sup>+2</sup> | $\text{MH}\text{-H}_3\text{PO}_4^{+2}$ | 1021.4949 | $y_9\text{-H}_3\text{PO}_4$    | 1442.6927 | $\text{MH}$                       |
| 437.7169 <sup>+2</sup> | $y_8\text{-H}_3\text{PO}_4^{+2}$ | 558.3286               | $b_5$                               | 714.4297               | $b_6$                                  | 1096.6513 | $b_{10}\text{-H}_3\text{PO}_4$ |           |                                   |
| 443.1893 <sup>+2</sup> | $y_7^{+2}$                       | 560.2395 <sup>+2</sup> | $y_9^{+2}$                          | 721.8500 <sup>+2</sup> | $\text{MH}^{+2}$                       | 1107.5962 | $b_9$                          |           |                                   |
| 448.7713 <sup>+2</sup> | $b_8\text{-H}_3\text{PO}_4^{+2}$ | 567.7931 <sup>+2</sup> | $y_{10}\text{-H}_3\text{PO}_4^{+2}$ | 729.2702               | $y_6$                                  | 1119.4718 | $y_9$                          |           |                                   |
| 449.1878               | $y_4$                            | 597.8178 <sup>+2</sup> | $b_{10}^{+2}$                       | 787.3945               | $y_7\text{-H}_3\text{PO}_4$            | 1134.579  | $y_{10}\text{-H}_3\text{PO}_4$ |           |                                   |

MS/MS Fragmentation of RLPIFSRLsISDD  
 Found in IPI00026947, Butyrate response factor 2

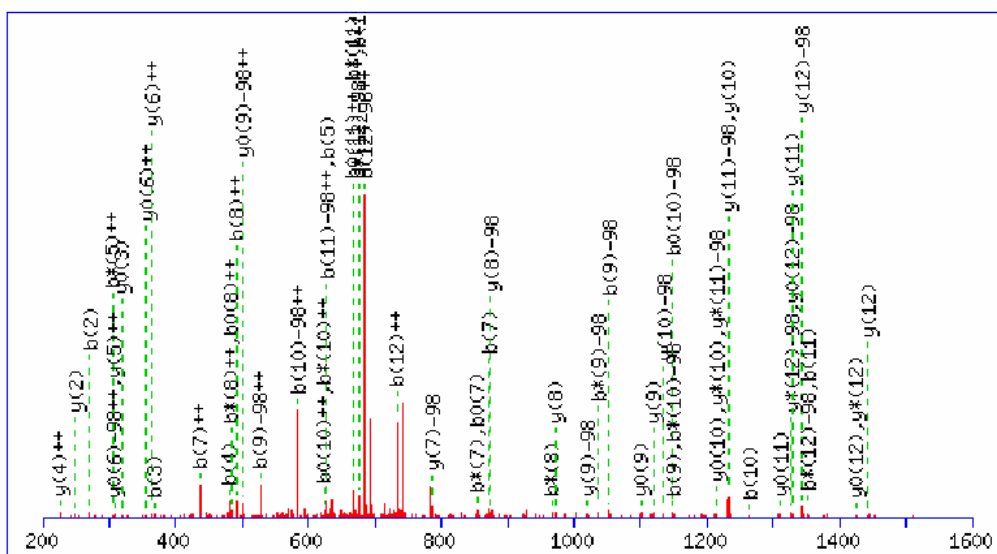

|                        |                                                              |                        |                                                               |                        |                                                               |                        |                                                 |           |                                                 |
|------------------------|--------------------------------------------------------------|------------------------|---------------------------------------------------------------|------------------------|---------------------------------------------------------------|------------------------|-------------------------------------------------|-----------|-------------------------------------------------|
| 134.0448               | y <sub>1</sub>                                               | 449.1878               | y <sub>4</sub>                                                | 626.8799 <sup>+2</sup> | b <sub>11</sub> -H <sub>3</sub> PO <sub>4</sub> <sup>+2</sup> | 799.9005 <sup>+2</sup> | MH <sup>+2</sup>                                | 1252.7525 | b <sub>11</sub> -H <sub>3</sub> PO <sub>4</sub> |
| 135.5999 <sup>+2</sup> | b <sub>2</sub> <sup>+2</sup>                                 | 480.3293               | b <sub>4</sub>                                                | 627.3977               | b <sub>5</sub>                                                | 870.5308               | b <sub>7</sub>                                  | 1263.6973 | b <sub>10</sub>                                 |
| 184.1262 <sup>+2</sup> | b <sub>3</sub> <sup>+2</sup>                                 | 486.7053 <sup>+2</sup> | y <sub>8</sub> <sup>+2</sup>                                  | 631.2933               | y <sub>6</sub> -H <sub>3</sub> PO <sub>4</sub>                | 874.4265               | y <sub>8</sub> -H <sub>3</sub> PO <sub>4</sub>  | 1329.6086 | y <sub>11</sub>                                 |
| 240.6683 <sup>+2</sup> | b <sub>4</sub> <sup>+2</sup>                                 | 492.3111 <sup>+2</sup> | b <sub>8</sub> <sup>+2</sup>                                  | 632.3523 <sup>+2</sup> | b <sub>10</sub> <sup>+2</sup>                                 | 885.3714               | y <sub>7</sub>                                  | 1344.7158 | y <sub>12</sub> -H <sub>3</sub> PO <sub>4</sub> |
| 249.0717               | y <sub>2</sub>                                               | 511.2511 <sup>+2</sup> | y <sub>9</sub> -H <sub>3</sub> PO <sub>4</sub> <sup>+2</sup>  | 665.3080 <sup>+2</sup> | y <sub>11</sub> <sup>+2</sup>                                 | 972.4034               | y <sub>8</sub>                                  | 1350.7293 | b <sub>11</sub>                                 |
| 270.1925               | b <sub>2</sub>                                               | 518.2093               | y <sub>5</sub> -H <sub>3</sub> PO <sub>4</sub>                | 672.8615 <sup>+2</sup> | y <sub>12</sub> -H <sub>3</sub> PO <sub>4</sub> <sup>+2</sup> | 983.6149               | b <sub>8</sub>                                  | 1367.7794 | b <sub>12</sub> -H <sub>3</sub> PO <sub>4</sub> |
| 314.2025 <sup>+2</sup> | b <sub>5</sub> <sup>+2</sup>                                 | 526.8218 <sup>+2</sup> | b <sub>9</sub> -H <sub>3</sub> PO <sub>4</sub> <sup>+2</sup>  | 675.8683 <sup>+2</sup> | b <sub>11</sub> <sup>+2</sup>                                 | 1021.4949              | y <sub>9</sub> -H <sub>3</sub> PO <sub>4</sub>  | 1442.6927 | y <sub>12</sub>                                 |
| 336.1038               | y <sub>3</sub>                                               | 560.2395 <sup>+2</sup> | y <sub>9</sub> <sup>+2</sup>                                  | 684.3933 <sup>+2</sup> | b <sub>12</sub> -H <sub>3</sub> PO <sub>4</sub> <sup>+2</sup> | 1052.6364              | b <sub>9</sub> -H <sub>3</sub> PO <sub>4</sub>  | 1465.7563 | b <sub>12</sub>                                 |
| 357.7185 <sup>+2</sup> | b <sub>6</sub> <sup>+2</sup>                                 | 567.7931 <sup>+2</sup> | y <sub>10</sub> -H <sub>3</sub> PO <sub>4</sub> <sup>+2</sup> | 714.4297               | b <sub>6</sub>                                                | 1119.4718              | y <sub>9</sub>                                  | 1500.8169 | MH-H <sub>3</sub> PO <sub>4</sub>               |
| 367.2452               | b <sub>3</sub>                                               | 575.8103 <sup>+2</sup> | b <sub>9</sub> <sup>+2</sup>                                  | 721.8500 <sup>+2</sup> | y <sub>12</sub> <sup>+2</sup>                                 | 1134.579               | y <sub>10</sub> -H <sub>3</sub> PO <sub>4</sub> | 1598.7938 | MH                                              |
| 394.2009 <sup>+2</sup> | y <sub>7</sub> -H <sub>3</sub> PO <sub>4</sub> <sup>+2</sup> | 583.3639 <sup>+2</sup> | b <sub>10</sub> -H <sub>3</sub> PO <sub>4</sub> <sup>+2</sup> | 729.2702               | y <sub>6</sub>                                                | 1150.6133              | b <sub>9</sub>                                  |           |                                                 |
| 435.7691 <sup>+2</sup> | b <sub>7</sub> <sup>+2</sup>                                 | 616.1862               | y <sub>5</sub>                                                | 733.3818 <sup>+2</sup> | b <sub>12</sub> <sup>+2</sup>                                 | 1165.7204              | b <sub>10</sub> -H <sub>3</sub> PO <sub>4</sub> |           |                                                 |
| 437.7169 <sup>+2</sup> | y <sub>8</sub> -H <sub>3</sub> PO <sub>4</sub> <sup>+2</sup> | 616.3195 <sup>+2</sup> | y <sub>11</sub> -H <sub>3</sub> PO <sub>4</sub> <sup>+2</sup> | 750.9121 <sup>+2</sup> | MH-H <sub>3</sub> PO <sub>4</sub> <sup>+2</sup>               | 1231.6317              | y <sub>11</sub> -H <sub>3</sub> PO <sub>4</sub> |           |                                                 |
| 443.1893 <sup>+2</sup> | y <sub>7</sub> <sup>+2</sup>                                 | 616.7816 <sup>+2</sup> | y <sub>10</sub> <sup>+2</sup>                                 | 787.3945               | y <sub>7</sub> -H <sub>3</sub> PO <sub>4</sub>                | 1232.5559              | y <sub>10</sub>                                 |           |                                                 |

MS/MS Fragmentation of HTPPTIGGsLPYR  
 Found in IPI00299588, ArgBPIB protein

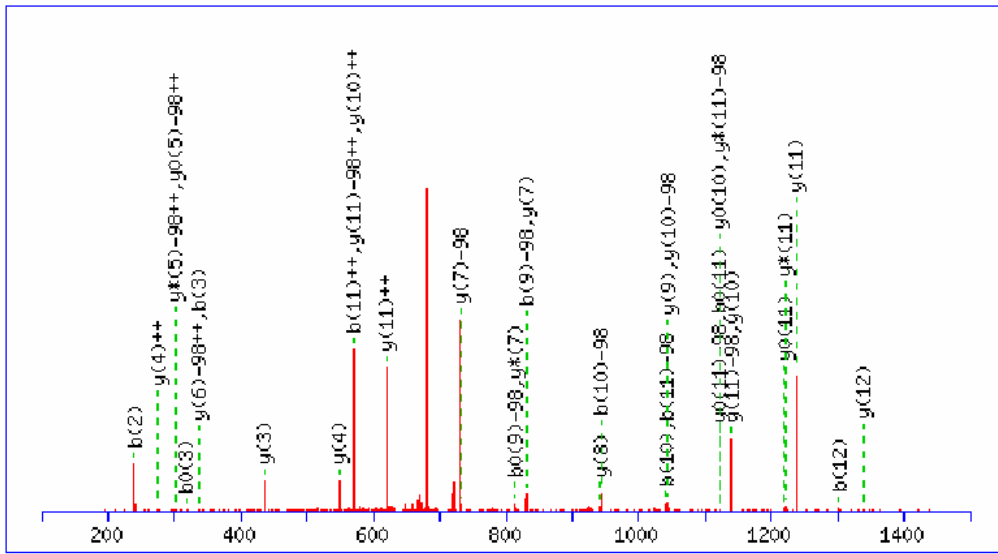

|                        |                                                              |                        |                                                               |                        |                                                               |                        |                                                 |           |                                                 |
|------------------------|--------------------------------------------------------------|------------------------|---------------------------------------------------------------|------------------------|---------------------------------------------------------------|------------------------|-------------------------------------------------|-----------|-------------------------------------------------|
| 88.0631 <sup>+2</sup>  | y <sub>1</sub> <sup>+2</sup>                                 | 352.6899 <sup>+2</sup> | b <sub>7</sub> <sup>+2</sup>                                  | 521.2419 <sup>+2</sup> | b <sub>10</sub> <sup>+2</sup>                                 | 674.362                | y <sub>6</sub> -H <sub>3</sub> PO <sub>4</sub>  | 1040.5524 | b <sub>11</sub> -H <sub>3</sub> PO <sub>4</sub> |
| 120.0606 <sup>+2</sup> | b <sub>2</sub> <sup>+2</sup>                                 | 358.1624 <sup>+2</sup> | y <sub>5</sub> <sup>+2</sup>                                  | 521.7876 <sup>+2</sup> | y <sub>10</sub> -H <sub>3</sub> PO <sub>4</sub> <sup>+2</sup> | 689.3673 <sup>+2</sup> | MH-H <sub>3</sub> PO <sub>4</sub> <sup>+2</sup> | 1041.4765 | b <sub>10</sub>                                 |
| 168.5870 <sup>+2</sup> | b <sub>3</sub> <sup>+2</sup>                                 | 366.1954 <sup>+2</sup> | y <sub>7</sub> -H <sub>3</sub> PO <sub>4</sub> <sup>+2</sup>  | 522.2497 <sup>+2</sup> | y <sub>9</sub> <sup>+2</sup>                                  | 704.3726               | b <sub>7</sub>                                  | 1042.568  | y <sub>10</sub> -H <sub>3</sub> PO <sub>4</sub> |
| 169.5948 <sup>+2</sup> | y <sub>2</sub> <sup>+2</sup>                                 | 381.2007 <sup>+2</sup> | b <sub>8</sub> <sup>+2</sup>                                  | 534.2671               | b <sub>5</sub>                                                | 715.3175               | y <sub>5</sub>                                  | 1043.4921 | y <sub>9</sub>                                  |
| 175.119                | y <sub>1</sub>                                               | 386.6731 <sup>+2</sup> | y <sub>6</sub> <sup>+2</sup>                                  | 548.3191               | y <sub>4</sub>                                                | 731.3835               | y <sub>7</sub> -H <sub>3</sub> PO <sub>4</sub>  | 1138.5293 | b <sub>11</sub>                                 |
| 217.1133 <sup>+2</sup> | b <sub>4</sub> <sup>+2</sup>                                 | 415.1838 <sup>+2</sup> | y <sub>7</sub> <sup>+2</sup>                                  | 569.7683 <sup>+2</sup> | b <sub>11</sub> <sup>+2</sup>                                 | 738.3558 <sup>+2</sup> | MH <sup>+2</sup>                                | 1139.6208 | y <sub>11</sub> -H <sub>3</sub> PO <sub>4</sub> |
| 218.1212 <sup>+2</sup> | y <sub>3</sub> <sup>+2</sup>                                 | 415.7114 <sup>+2</sup> | b <sub>9</sub> -H <sub>3</sub> PO <sub>4</sub> <sup>+2</sup>  | 570.3140 <sup>+2</sup> | y <sub>11</sub> -H <sub>3</sub> PO <sub>4</sub> <sup>+2</sup> | 761.3941               | b <sub>8</sub>                                  | 1140.5449 | y <sub>10</sub>                                 |
| 239.1139               | b <sub>2</sub>                                               | 422.7374 <sup>+2</sup> | y <sub>8</sub> -H <sub>3</sub> PO <sub>4</sub> <sup>+2</sup>  | 570.7761 <sup>+2</sup> | y <sub>10</sub> <sup>+2</sup>                                 | 772.3389               | y <sub>6</sub>                                  | 1203.6157 | b <sub>12</sub> -H <sub>3</sub> PO <sub>4</sub> |
| 267.6372 <sup>+2</sup> | b <sub>5</sub> <sup>+2</sup>                                 | 433.2194               | b <sub>4</sub>                                                | 602.3115 <sup>+2</sup> | b <sub>12</sub> -H <sub>3</sub> PO <sub>4</sub> <sup>+2</sup> | 829.3604               | y <sub>7</sub>                                  | 1237.5977 | y <sub>11</sub>                                 |
| 274.6632 <sup>+2</sup> | y <sub>4</sub> <sup>+2</sup>                                 | 435.235                | y <sub>3</sub>                                                | 617.3406               | y <sub>5</sub> -H <sub>3</sub> PO <sub>4</sub>                | 830.4155               | b <sub>9</sub> -H <sub>3</sub> PO <sub>4</sub>  | 1240.6684 | y <sub>12</sub> -H <sub>3</sub> PO <sub>4</sub> |
| 309.1739 <sup>+2</sup> | y <sub>5</sub> -H <sub>3</sub> PO <sub>4</sub> <sup>+2</sup> | 464.6998 <sup>+2</sup> | b <sub>9</sub> <sup>+2</sup>                                  | 619.3025 <sup>+2</sup> | y <sub>11</sub> <sup>+2</sup>                                 | 844.4676               | y <sub>8</sub> -H <sub>3</sub> PO <sub>4</sub>  | 1301.5926 | b <sub>12</sub>                                 |
| 324.1792 <sup>+2</sup> | b <sub>6</sub> <sup>+2</sup>                                 | 471.7259 <sup>+2</sup> | y <sub>8</sub> <sup>+2</sup>                                  | 620.8379 <sup>+2</sup> | y <sub>12</sub> -H <sub>3</sub> PO <sub>4</sub> <sup>+2</sup> | 928.3924               | b <sub>9</sub>                                  | 1338.6453 | y <sub>12</sub>                                 |
| 336.1666               | b <sub>3</sub>                                               | 472.2534 <sup>+2</sup> | b <sub>10</sub> -H <sub>3</sub> PO <sub>4</sub> <sup>+2</sup> | 647.3511               | b <sub>6</sub>                                                | 942.4445               | y <sub>8</sub>                                  | 1377.7274 | MH-H <sub>3</sub> PO <sub>4</sub>               |
| 337.6847 <sup>+2</sup> | y <sub>6</sub> -H <sub>3</sub> PO <sub>4</sub> <sup>+2</sup> | 473.2613 <sup>+2</sup> | y <sub>9</sub> -H <sub>3</sub> PO <sub>4</sub> <sup>+2</sup>  | 651.2999 <sup>+2</sup> | b <sub>12</sub> <sup>+2</sup>                                 | 943.4996               | b <sub>10</sub> -H <sub>3</sub> PO <sub>4</sub> | 1475.7043 | MH                                              |
| 338.1823               | y <sub>2</sub>                                               | 520.7798 <sup>+2</sup> | b <sub>11</sub> -H <sub>3</sub> PO <sub>4</sub> <sup>+2</sup> | 669.8263 <sup>+2</sup> | y <sub>12</sub> <sup>+2</sup>                                 | 945.5152               | y <sub>9</sub> -H <sub>3</sub> PO <sub>4</sub>  |           |                                                 |

MS/MS Fragmentation of LEAAEAAGGASPDsPPER  
 Found in IPI00420019, Isoform 1 of Protein Dos

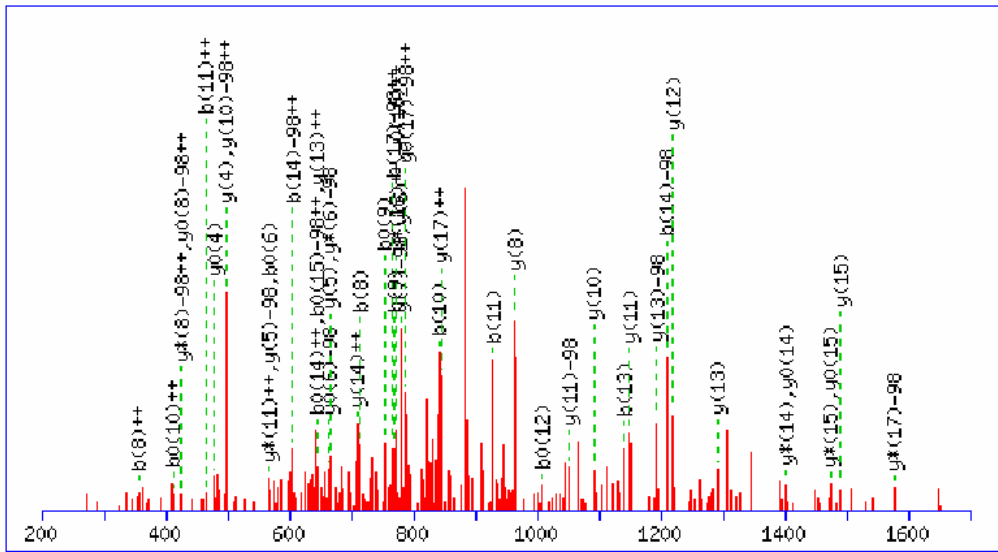

|                        |                                                              |                        |                                                               |                        |                                                               |                        |                                                 |           |                                                 |
|------------------------|--------------------------------------------------------------|------------------------|---------------------------------------------------------------|------------------------|---------------------------------------------------------------|------------------------|-------------------------------------------------|-----------|-------------------------------------------------|
| 88.0631 <sup>+2</sup>  | y <sub>1</sub> <sup>+2</sup>                                 | 469.2223 <sup>+2</sup> | y <sub>9</sub> -H <sub>3</sub> PO <sub>4</sub> <sup>+2</sup>  | 665.2654               | y <sub>5</sub>                                                | 902.8911 <sup>+2</sup> | MH <sup>+2</sup>                                | 1307.5151 | b <sub>14</sub>                                 |
| 152.5844 <sup>+2</sup> | y <sub>2</sub> <sup>+2</sup>                                 | 482.6922 <sup>+2</sup> | y <sub>8</sub> <sup>+2</sup>                                  | 682.3155               | y <sub>6</sub> -H <sub>3</sub> PO <sub>4</sub>                | 928.4371               | b <sub>11</sub>                                 | 1322.5971 | y <sub>14</sub> -H <sub>3</sub> PO <sub>4</sub> |
| 175.119                | y <sub>1</sub>                                               | 497.7331 <sup>+2</sup> | y <sub>10</sub> -H <sub>3</sub> PO <sub>4</sub> <sup>+2</sup> | 697.3208 <sup>+2</sup> | y <sub>15</sub> -H <sub>3</sub> PO <sub>4</sub> <sup>+2</sup> | 937.4374               | y <sub>9</sub> -H <sub>3</sub> PO <sub>4</sub>  | 1393.6342 | y <sub>15</sub> -H <sub>3</sub> PO <sub>4</sub> |
| 201.1108 <sup>+2</sup> | y <sub>3</sub> <sup>+2</sup>                                 | 498.2671               | y <sub>4</sub>                                                | 710.7907 <sup>+2</sup> | y <sub>14</sub> <sup>+2</sup>                                 | 964.3772               | y <sub>8</sub>                                  | 1403.6437 | b <sub>16</sub> -H <sub>3</sub> PO <sub>4</sub> |
| 243.1339               | b <sub>2</sub>                                               | 514.2508               | b <sub>5</sub>                                                | 713.3464               | b <sub>8</sub>                                                | 994.4588               | y <sub>10</sub> -H <sub>3</sub> PO <sub>4</sub> | 1404.5679 | b <sub>15</sub>                                 |
| 249.6372 <sup>+2</sup> | y <sub>4</sub> <sup>+2</sup>                                 | 518.2108 <sup>+2</sup> | y <sub>9</sub> <sup>+2</sup>                                  | 732.8393 <sup>+2</sup> | y <sub>16</sub> -H <sub>3</sub> PO <sub>4</sub> <sup>+2</sup> | 1025.4898              | b <sub>12</sub>                                 | 1420.574  | y <sub>14</sub>                                 |
| 284.1479 <sup>+2</sup> | y <sub>5</sub> -H <sub>3</sub> PO <sub>4</sub> <sup>+2</sup> | 526.2438 <sup>+2</sup> | y <sub>11</sub> -H <sub>3</sub> PO <sub>4</sub> <sup>+2</sup> | 746.3092 <sup>+2</sup> | y <sub>15</sub> <sup>+2</sup>                                 | 1035.4143              | y <sub>9</sub>                                  | 1464.6714 | y <sub>16</sub> -H <sub>3</sub> PO <sub>4</sub> |
| 304.1615               | y <sub>2</sub>                                               | 546.7215 <sup>+2</sup> | y <sub>10</sub> <sup>+2</sup>                                 | 770.3679               | b <sub>9</sub>                                                | 1051.4803              | y <sub>11</sub> -H <sub>3</sub> PO <sub>4</sub> | 1491.6111 | y <sub>15</sub>                                 |
| 314.171                | b <sub>3</sub>                                               | 561.7624 <sup>+2</sup> | y <sub>12</sub> -H <sub>3</sub> PO <sub>4</sub> <sup>+2</sup> | 779.3682               | y <sub>7</sub> -H <sub>3</sub> PO <sub>4</sub>                | 1092.4357              | y <sub>10</sub>                                 | 1501.6206 | b <sub>16</sub>                                 |
| 333.1364 <sup>+2</sup> | y <sub>5</sub> <sup>+2</sup>                                 | 567.2885               | y <sub>5</sub> -H <sub>3</sub> PO <sub>4</sub>                | 780.2924               | y <sub>6</sub>                                                | 1122.5174              | y <sub>12</sub> -H <sub>3</sub> PO <sub>4</sub> | 1532.6863 | b <sub>17</sub> -H <sub>3</sub> PO <sub>4</sub> |
| 341.6614 <sup>+2</sup> | y <sub>6</sub> -H <sub>3</sub> PO <sub>4</sub> <sup>+2</sup> | 575.2322 <sup>+2</sup> | y <sub>11</sub> <sup>+2</sup>                                 | 781.8278 <sup>+2</sup> | y <sub>16</sub> <sup>+2</sup>                                 | 1140.5168              | b <sub>13</sub>                                 | 1562.6483 | y <sub>16</sub>                                 |
| 385.2082               | b <sub>4</sub>                                               | 585.2879               | b <sub>6</sub>                                                | 797.3606 <sup>+2</sup> | y <sub>17</sub> -H <sub>3</sub> PO <sub>4</sub> <sup>+2</sup> | 1149.4572              | y <sub>11</sub>                                 | 1593.714  | y <sub>17</sub> -H <sub>3</sub> PO <sub>4</sub> |
| 390.1878 <sup>+2</sup> | y <sub>7</sub> -H <sub>3</sub> PO <sub>4</sub> <sup>+2</sup> | 597.2809 <sup>+2</sup> | y <sub>13</sub> -H <sub>3</sub> PO <sub>4</sub> <sup>+2</sup> | 841.405                | b <sub>10</sub>                                               | 1193.5545              | y <sub>13</sub> -H <sub>3</sub> PO <sub>4</sub> | 1630.6632 | b <sub>17</sub>                                 |
| 390.6498 <sup>+2</sup> | y <sub>6</sub> <sup>+2</sup>                                 | 610.7508 <sup>+2</sup> | y <sub>12</sub> <sup>+2</sup>                                 | 846.3491 <sup>+2</sup> | y <sub>17</sub> <sup>+2</sup>                                 | 1209.5382              | b <sub>14</sub> -H <sub>3</sub> PO <sub>4</sub> | 1691.6908 | y <sub>17</sub>                                 |
| 401.2143               | y <sub>3</sub>                                               | 646.2694 <sup>+2</sup> | y <sub>13</sub> <sup>+2</sup>                                 | 853.9026 <sup>+2</sup> | MH-H <sub>3</sub> PO <sub>4</sub> <sup>+2</sup>               | 1220.4943              | y <sub>12</sub>                                 | 1706.798  | MH-H <sub>3</sub> PO <sub>4</sub>               |
| 433.7038 <sup>+2</sup> | y <sub>8</sub> -H <sub>3</sub> PO <sub>4</sub> <sup>+2</sup> | 656.325                | b <sub>7</sub>                                                | 866.4003               | y <sub>8</sub> -H <sub>3</sub> PO <sub>4</sub>                | 1291.5314              | y <sub>13</sub>                                 | 1804.7749 | MH                                              |
| 439.1762 <sup>+2</sup> | y <sub>7</sub> <sup>+2</sup>                                 | 661.8022 <sup>+2</sup> | y <sub>14</sub> -H <sub>3</sub> PO <sub>4</sub> <sup>+2</sup> | 877.3451               | y <sub>7</sub>                                                | 1306.591               | b <sub>15</sub> -H <sub>3</sub> PO <sub>4</sub> |           |                                                 |

MS/MS Fragmentation of GAGDDTEPPAAPRPRsPR  
 Found in IPI00420019, Isoform 1 of Protein Dos

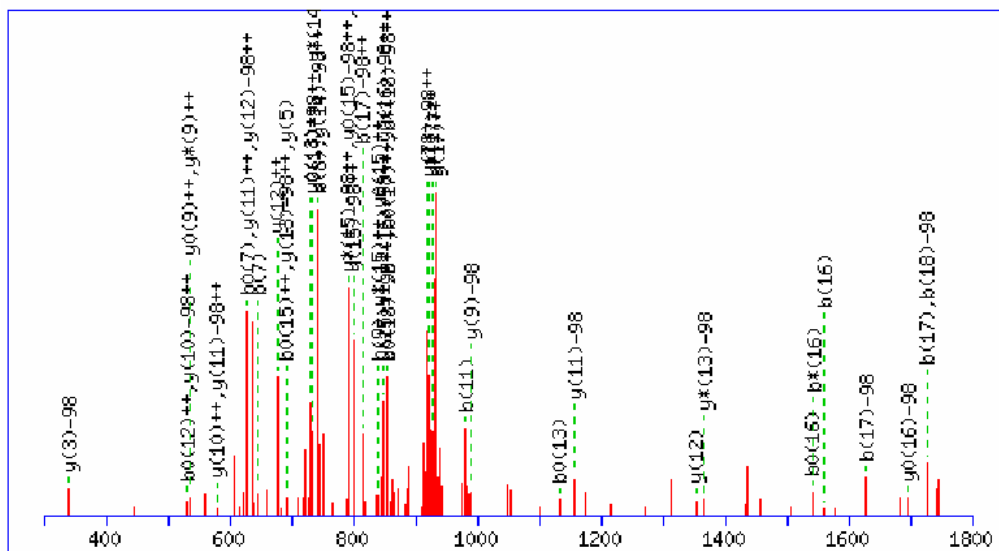

|                        |                                                              |                        |                                                               |                        |                                                               |                        |                                                               |           |                                                 |
|------------------------|--------------------------------------------------------------|------------------------|---------------------------------------------------------------|------------------------|---------------------------------------------------------------|------------------------|---------------------------------------------------------------|-----------|-------------------------------------------------|
| 88.0631 <sup>+2</sup>  | y <sub>1</sub> <sup>+2</sup>                                 | 460.2347 <sup>+2</sup> | y <sub>7</sub> <sup>+2</sup>                                  | 742.9077 <sup>+2</sup> | y <sub>14</sub> -H <sub>3</sub> PO <sub>4</sub> <sup>+2</sup> | 921.9639 <sup>+2</sup> | y <sub>18</sub> -H <sub>3</sub> PO <sub>4</sub> <sup>+2</sup> | 1481.7373 | y <sub>13</sub>                                 |
| 129.0659               | b <sub>2</sub>                                               | 495.2912 <sup>+2</sup> | y <sub>9</sub> -H <sub>3</sub> PO <sub>4</sub> <sup>+2</sup>  | 743.2842               | b <sub>8</sub>                                                | 935.4338 <sup>+2</sup> | y <sub>17</sub> <sup>+2</sup>                                 | 1484.8081 | y <sub>14</sub> -H <sub>3</sub> PO <sub>4</sub> |
| 136.5895 <sup>+2</sup> | y <sub>2</sub> <sup>+2</sup>                                 | 497.2943               | y <sub>4</sub> -H <sub>3</sub> PO <sub>4</sub>                | 750.4482               | y <sub>6</sub> -H <sub>3</sub> PO <sub>4</sub>                | 950.4746 <sup>+2</sup> | MH-H <sub>3</sub> PO <sub>4</sub> <sup>+2</sup>               | 1559.7561 | b <sub>16</sub>                                 |
| 171.1002 <sup>+2</sup> | y <sub>3</sub> -H <sub>3</sub> PO <sub>4</sub> <sup>+2</sup> | 508.7611 <sup>+2</sup> | y <sub>8</sub> <sup>+2</sup>                                  | 780.3817 <sup>+2</sup> | b <sub>16</sub> <sup>+2</sup>                                 | 970.9524 <sup>+2</sup> | y <sub>18</sub> <sup>+2</sup>                                 | 1582.785  | y <sub>14</sub>                                 |
| 175.119                | y <sub>1</sub>                                               | 517.1889               | b <sub>6</sub>                                                | 791.8961 <sup>+2</sup> | y <sub>14</sub> <sup>+2</sup>                                 | 982.4112               | b <sub>11</sub>                                               | 1599.835  | y <sub>15</sub> -H <sub>3</sub> PO <sub>4</sub> |
| 186.0873               | b <sub>3</sub>                                               | 530.8098 <sup>+2</sup> | y <sub>10</sub> -H <sub>3</sub> PO <sub>4</sub> <sup>+2</sup> | 800.4211 <sup>+2</sup> | y <sub>15</sub> -H <sub>3</sub> PO <sub>4</sub> <sup>+2</sup> | 989.5752               | y <sub>9</sub> -H <sub>3</sub> PO <sub>4</sub>                | 1628.7776 | b <sub>17</sub> -H <sub>3</sub> PO <sub>4</sub> |
| 220.0887 <sup>+2</sup> | y <sub>3</sub> <sup>+2</sup>                                 | 544.2797 <sup>+2</sup> | y <sub>9</sub> <sup>+2</sup>                                  | 814.8924 <sup>+2</sup> | b <sub>17</sub> -H <sub>3</sub> PO <sub>4</sub> <sup>+2</sup> | 999.4631 <sup>+2</sup> | MH <sup>+2</sup>                                              | 1697.8119 | y <sub>15</sub>                                 |
| 249.1508 <sup>+2</sup> | y <sub>4</sub> -H <sub>3</sub> PO <sub>4</sub> <sup>+2</sup> | 579.3362 <sup>+2</sup> | y <sub>11</sub> -H <sub>3</sub> PO <sub>4</sub> <sup>+2</sup> | 821.4853               | y <sub>7</sub> -H <sub>3</sub> PO <sub>4</sub>                | 1016.5149              | y <sub>8</sub>                                                | 1714.862  | y <sub>16</sub> -H <sub>3</sub> PO <sub>4</sub> |
| 272.1717               | y <sub>2</sub>                                               | 579.7982 <sup>+2</sup> | y <sub>10</sub> <sup>+2</sup>                                 | 840.337                | b <sub>9</sub>                                                | 1060.6123              | y <sub>10</sub> -H <sub>3</sub> PO <sub>4</sub>               | 1725.8303 | b <sub>18</sub> -H <sub>3</sub> PO <sub>4</sub> |
| 297.6772 <sup>+2</sup> | y <sub>5</sub> -H <sub>3</sub> PO <sub>4</sub> <sup>+2</sup> | 594.3471               | y <sub>5</sub> -H <sub>3</sub> PO <sub>4</sub>                | 848.4251               | y <sub>6</sub>                                                | 1079.464               | b <sub>12</sub>                                               | 1726.7545 | b <sub>17</sub>                                 |
| 298.1392 <sup>+2</sup> | y <sub>4</sub> <sup>+2</sup>                                 | 595.2712               | y <sub>4</sub>                                                | 849.4096 <sup>+2</sup> | y <sub>15</sub> <sup>+2</sup>                                 | 1087.5521              | y <sub>9</sub>                                                | 1771.8834 | y <sub>17</sub> -H <sub>3</sub> PO <sub>4</sub> |
| 301.1143               | b <sub>4</sub>                                               | 627.8625 <sup>+2</sup> | y <sub>12</sub> -H <sub>3</sub> PO <sub>4</sub> <sup>+2</sup> | 857.9346 <sup>+2</sup> | y <sub>16</sub> -H <sub>3</sub> PO <sub>4</sub> <sup>+2</sup> | 1150.5011              | b <sub>13</sub>                                               | 1812.8389 | y <sub>16</sub>                                 |
| 341.1932               | y <sub>3</sub> -H <sub>3</sub> PO <sub>4</sub>               | 628.3246 <sup>+2</sup> | y <sub>11</sub> <sup>+2</sup>                                 | 863.4188 <sup>+2</sup> | b <sub>18</sub> -H <sub>3</sub> PO <sub>4</sub> <sup>+2</sup> | 1157.665               | y <sub>11</sub> -H <sub>3</sub> PO <sub>4</sub>               | 1823.8072 | b <sub>18</sub>                                 |
| 346.6656 <sup>+2</sup> | y <sub>5</sub> <sup>+2</sup>                                 | 646.2315               | b <sub>7</sub>                                                | 863.8809 <sup>+2</sup> | b <sub>17</sub> <sup>+2</sup>                                 | 1158.5892              | y <sub>10</sub>                                               | 1842.9205 | y <sub>18</sub> -H <sub>3</sub> PO <sub>4</sub> |
| 375.7277 <sup>+2</sup> | y <sub>6</sub> -H <sub>3</sub> PO <sub>4</sub> <sup>+2</sup> | 653.8047 <sup>+2</sup> | b <sub>14</sub> <sup>+2</sup>                                 | 886.4453 <sup>+2</sup> | y <sub>17</sub> -H <sub>3</sub> PO <sub>4</sub> <sup>+2</sup> | 1254.7178              | y <sub>12</sub> -H <sub>3</sub> PO <sub>4</sub>               | 1869.8603 | y <sub>17</sub>                                 |
| 411.2463 <sup>+2</sup> | y <sub>7</sub> -H <sub>3</sub> PO <sub>4</sub> <sup>+2</sup> | 676.8510 <sup>+2</sup> | y <sub>12</sub> <sup>+2</sup>                                 | 906.9231 <sup>+2</sup> | y <sub>16</sub> <sup>+2</sup>                                 | 1255.6419              | y <sub>11</sub>                                               | 1899.942  | MH-H <sub>3</sub> PO <sub>4</sub>               |
| 416.1412               | b <sub>5</sub>                                               | 692.3239               | y <sub>5</sub>                                                | 911.3741               | b <sub>10</sub>                                               | 1306.6022              | b <sub>14</sub>                                               | 1940.8974 | y <sub>18</sub>                                 |
| 424.7162 <sup>+2</sup> | y <sub>6</sub> <sup>+2</sup>                                 | 692.3838 <sup>+2</sup> | y <sub>13</sub> -H <sub>3</sub> PO <sub>4</sub> <sup>+2</sup> | 912.4072 <sup>+2</sup> | b <sub>18</sub> <sup>+2</sup>                                 | 1352.6947              | y <sub>12</sub>                                               | 1997.9189 | MH                                              |
| 439.1701               | y <sub>3</sub>                                               | 702.3311 <sup>+2</sup> | b <sub>15</sub> <sup>+2</sup>                                 | 918.538                | y <sub>8</sub> -H <sub>3</sub> PO <sub>4</sub>                | 1383.7604              | y <sub>13</sub> -H <sub>3</sub> PO <sub>4</sub>               |           |                                                 |
| 459.7727 <sup>+2</sup> | y <sub>8</sub> -H <sub>3</sub> PO <sub>4</sub> <sup>+2</sup> | 741.3723 <sup>+2</sup> | y <sub>13</sub> <sup>+2</sup>                                 | 919.4622               | y <sub>7</sub>                                                | 1403.655               | b <sub>15</sub>                                               |           |                                                 |

MS/MS Fragmentation of LAEPVVATPALVAAAPT<sub>s</sub>PDHSPA  
 Found in IPI00420019, Isoform 1 of Protein Dos

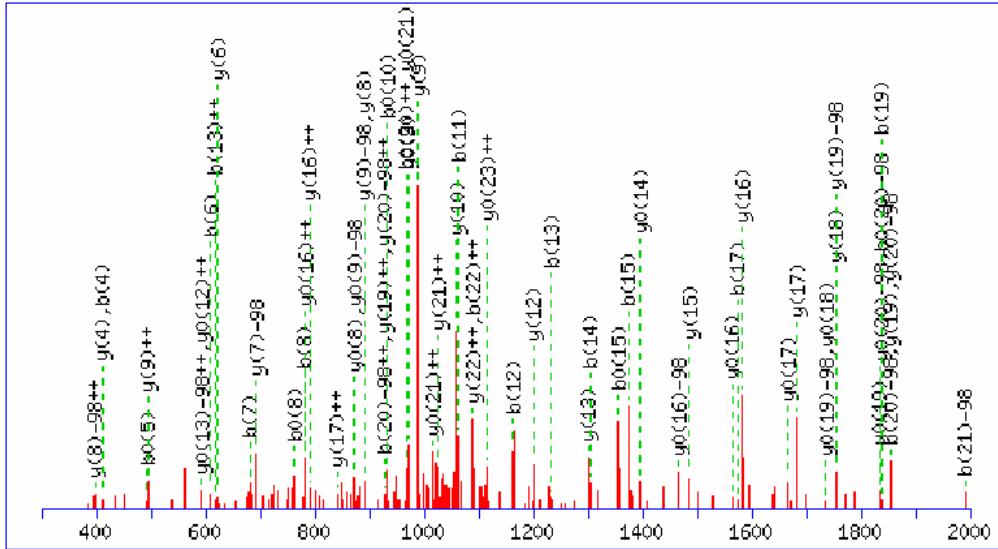

|                        |                                                               |                        |                                                               |                         |                                                               |                         |                                                 |           |                                                 |
|------------------------|---------------------------------------------------------------|------------------------|---------------------------------------------------------------|-------------------------|---------------------------------------------------------------|-------------------------|-------------------------------------------------|-----------|-------------------------------------------------|
| 90.055                 | y <sub>1</sub>                                                | 601.2479 <sup>+2</sup> | y <sub>12</sub> <sup>+2</sup>                                 | 891.3244                | y <sub>8</sub>                                                | 1132.5997 <sup>+2</sup> | MH-H <sub>3</sub> PO <sub>4</sub> <sup>+2</sup> | 1739.8979 | b <sub>18</sub>                                 |
| 185.1285               | b <sub>2</sub>                                                | 601.7937 <sup>+2</sup> | y <sub>13</sub> -H <sub>3</sub> PO <sub>4</sub> <sup>+2</sup> | 926.9457 <sup>+2</sup>  | y <sub>19</sub> <sup>+2</sup>                                 | 1137.0643 <sup>+2</sup> | b <sub>23</sub> <sup>+2</sup>                   | 1753.8157 | y <sub>18</sub>                                 |
| 187.1077               | y <sub>2</sub>                                                | 609.3606               | b <sub>6</sub>                                                | 927.4914 <sup>+2</sup>  | y <sub>20</sub> -H <sub>3</sub> PO <sub>4</sub> <sup>+2</sup> | 1161.6878               | b <sub>12</sub>                                 | 1754.9072 | y <sub>19</sub> -H <sub>3</sub> PO <sub>4</sub> |
| 206.1030 <sup>+2</sup> | y <sub>4</sub> <sup>+2</sup>                                  | 623.2784               | y <sub>6</sub>                                                | 949.5353                | b <sub>10</sub>                                               | 1181.5881 <sup>+2</sup> | MH <sup>+2</sup>                                | 1836.9507 | b <sub>19</sub>                                 |
| 263.6164 <sup>+2</sup> | y <sub>5</sub> <sup>+2</sup>                                  | 650.7821 <sup>+2</sup> | y <sub>13</sub> <sup>+2</sup>                                 | 961.4374                | y <sub>10</sub> -H <sub>3</sub> PO <sub>4</sub>               | 1201.4885               | y <sub>12</sub>                                 | 1852.8841 | y <sub>19</sub>                                 |
| 274.1397               | y <sub>3</sub>                                                | 658.3357 <sup>+2</sup> | y <sub>14</sub> -H <sub>3</sub> PO <sub>4</sub> <sup>+2</sup> | 976.0178 <sup>+2</sup>  | y <sub>21</sub> -H <sub>3</sub> PO <sub>4</sub> <sup>+2</sup> | 1202.58                 | y <sub>13</sub> -H <sub>3</sub> PO <sub>4</sub> | 1853.9756 | y <sub>20</sub> -H <sub>3</sub> PO <sub>4</sub> |
| 312.1428 <sup>+2</sup> | y <sub>6</sub> <sup>+2</sup>                                  | 680.3978               | b <sub>7</sub>                                                | 976.4799 <sup>+2</sup>  | y <sub>20</sub> <sup>+2</sup>                                 | 1232.7249               | b <sub>13</sub>                                 | 1854.0007 | b <sub>20</sub> -H <sub>3</sub> PO <sub>4</sub> |
| 314.171                | b <sub>3</sub>                                                | 692.2998               | y <sub>7</sub> -H <sub>3</sub> PO <sub>4</sub>                | 988.3772                | y <sub>9</sub>                                                | 1300.5569               | y <sub>13</sub>                                 | 1951.0284 | y <sub>21</sub> -H <sub>3</sub> PO <sub>4</sub> |
| 346.6536 <sup>+2</sup> | y <sub>7</sub> -H <sub>3</sub> PO <sub>4</sub> <sup>+2</sup>  | 693.8542 <sup>+2</sup> | y <sub>15</sub> -H <sub>3</sub> PO <sub>4</sub> <sup>+2</sup> | 996.0335 <sup>+2</sup>  | b <sub>21</sub> -H <sub>3</sub> PO <sub>4</sub> <sup>+2</sup> | 1303.762                | b <sub>14</sub>                                 | 1951.9525 | y <sub>20</sub>                                 |
| 395.6420 <sup>+2</sup> | y <sub>7</sub> <sup>+2</sup>                                  | 707.3241 <sup>+2</sup> | y <sub>14</sub> <sup>+2</sup>                                 | 1025.0063 <sup>+2</sup> | y <sub>21</sub> <sup>+2</sup>                                 | 1315.6641               | y <sub>14</sub> -H <sub>3</sub> PO <sub>4</sub> | 1951.9776 | b <sub>20</sub>                                 |
| 397.1774 <sup>+2</sup> | y <sub>8</sub> -H <sub>3</sub> PO <sub>4</sub> <sup>+2</sup>  | 742.3806 <sup>+2</sup> | y <sub>16</sub> -H <sub>3</sub> PO <sub>4</sub> <sup>+2</sup> | 1032.4745               | y <sub>11</sub> -H <sub>3</sub> PO <sub>4</sub>               | 1374.7991               | b <sub>15</sub>                                 | 1991.0597 | b <sub>21</sub> -H <sub>3</sub> PO <sub>4</sub> |
| 411.1987               | y <sub>4</sub>                                                | 742.8427 <sup>+2</sup> | y <sub>15</sub> <sup>+2</sup>                                 | 1039.5495 <sup>+2</sup> | b <sub>22</sub> -H <sub>3</sub> PO <sub>4</sub> <sup>+2</sup> | 1386.7012               | y <sub>15</sub> -H <sub>3</sub> PO <sub>4</sub> | 2049.0052 | y <sub>21</sub>                                 |
| 411.2238               | b <sub>4</sub>                                                | 781.4454               | b <sub>8</sub>                                                | 1040.5391 <sup>+2</sup> | y <sub>22</sub> -H <sub>3</sub> PO <sub>4</sub> <sup>+2</sup> | 1413.641                | y <sub>14</sub>                                 | 2078.0917 | b <sub>22</sub> -H <sub>3</sub> PO <sub>4</sub> |
| 445.7038 <sup>+2</sup> | y <sub>9</sub> -H <sub>3</sub> PO <sub>4</sub> <sup>+2</sup>  | 790.2767               | y <sub>7</sub>                                                | 1045.0219 <sup>+2</sup> | b <sub>21</sub> <sup>+2</sup>                                 | 1471.8519               | b <sub>16</sub>                                 | 2080.0709 | y <sub>22</sub> -H <sub>3</sub> PO <sub>4</sub> |
| 446.1658 <sup>+2</sup> | y <sub>8</sub> <sup>+2</sup>                                  | 791.3691 <sup>+2</sup> | y <sub>16</sub> <sup>+2</sup>                                 | 1059.4143               | y <sub>10</sub>                                               | 1483.754                | y <sub>16</sub> -H <sub>3</sub> PO <sub>4</sub> | 2089.0365 | b <sub>21</sub>                                 |
| 481.2223 <sup>+2</sup> | y <sub>10</sub> -H <sub>3</sub> PO <sub>4</sub> <sup>+2</sup> | 792.9045 <sup>+2</sup> | y <sub>17</sub> -H <sub>3</sub> PO <sub>4</sub> <sup>+2</sup> | 1062.6194               | b <sub>11</sub>                                               | 1484.6781               | y <sub>15</sub>                                 | 2151.1081 | y <sub>23</sub> -H <sub>3</sub> PO <sub>4</sub> |
| 494.6922 <sup>+2</sup> | y <sub>9</sub> <sup>+2</sup>                                  | 793.3475               | y <sub>8</sub> -H <sub>3</sub> PO <sub>4</sub>                | 1076.0577 <sup>+2</sup> | y <sub>23</sub> -H <sub>3</sub> PO <sub>4</sub> <sup>+2</sup> | 1572.8996               | b <sub>17</sub>                                 | 2175.1444 | b <sub>23</sub> -H <sub>3</sub> PO <sub>4</sub> |
| 510.2922               | b <sub>5</sub>                                                | 828.4230 <sup>+2</sup> | y <sub>18</sub> -H <sub>3</sub> PO <sub>4</sub> <sup>+2</sup> | 1088.0759 <sup>+2</sup> | b <sub>23</sub> -H <sub>3</sub> PO <sub>4</sub> <sup>+2</sup> | 1581.7309               | y <sub>16</sub>                                 | 2176.0686 | b <sub>22</sub>                                 |
| 516.7409 <sup>+2</sup> | y <sub>11</sub> -H <sub>3</sub> PO <sub>4</sub> <sup>+2</sup> | 841.8929 <sup>+2</sup> | y <sub>17</sub> <sup>+2</sup>                                 | 1088.5379 <sup>+2</sup> | b <sub>22</sub> <sup>+2</sup>                                 | 1584.8016               | y <sub>17</sub> -H <sub>3</sub> PO <sub>4</sub> | 2178.0478 | y <sub>22</sub>                                 |
| 526.2256               | y <sub>5</sub>                                                | 877.4115 <sup>+2</sup> | y <sub>18</sub> <sup>+2</sup>                                 | 1089.5276 <sup>+2</sup> | y <sub>22</sub> <sup>+2</sup>                                 | 1641.921                | b <sub>18</sub> -H <sub>3</sub> PO <sub>4</sub> | 2249.085  | y <sub>23</sub>                                 |
| 530.2108 <sup>+2</sup> | y <sub>10</sub> <sup>+2</sup>                                 | 877.9572 <sup>+2</sup> | y <sub>19</sub> -H <sub>3</sub> PO <sub>4</sub> <sup>+2</sup> | 1103.5116               | y <sub>12</sub> -H <sub>3</sub> PO <sub>4</sub>               | 1655.8388               | y <sub>18</sub> -H <sub>3</sub> PO <sub>4</sub> | 2264.1921 | MH-H <sub>3</sub> PO <sub>4</sub>               |
| 552.2594 <sup>+2</sup> | y <sub>12</sub> -H <sub>3</sub> PO <sub>4</sub> <sup>+2</sup> | 878.4982               | b <sub>9</sub>                                                | 1125.0461 <sup>+2</sup> | y <sub>23</sub> <sup>+2</sup>                                 | 1682.7785               | y <sub>17</sub>                                 | 2273.1213 | b <sub>23</sub>                                 |
| 565.7293 <sup>+2</sup> | y <sub>11</sub> <sup>+2</sup>                                 | 890.4003               | y <sub>9</sub> -H <sub>3</sub> PO <sub>4</sub>                | 1130.4514               | y <sub>11</sub>                                               | 1738.9738               | b <sub>19</sub> -H <sub>3</sub> PO <sub>4</sub> | 2362.169  | MH                                              |



MS/MS Fragmentation of SQsGTLDGESAAWSASGEDSR  
 Found in IPI00028493, Isoform 1 of Tuberin

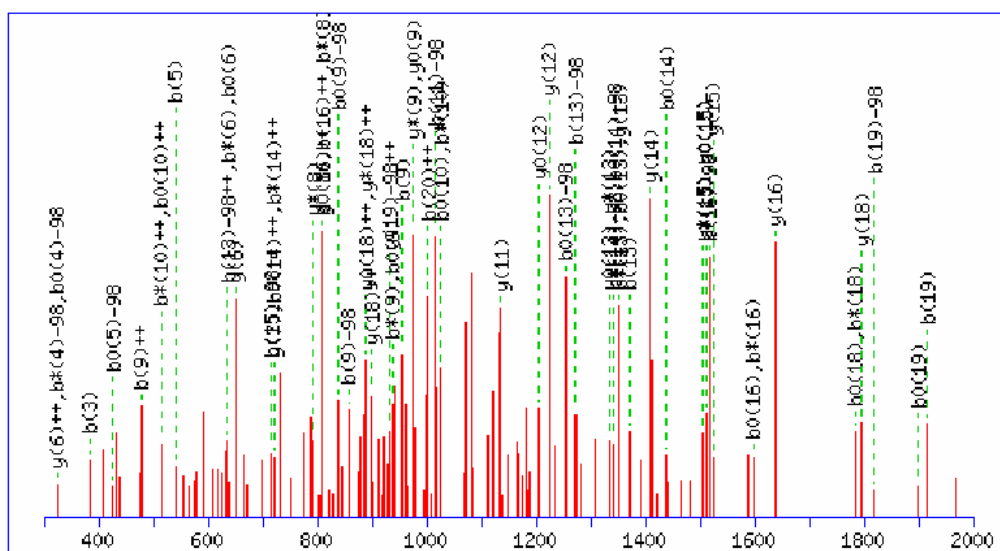

|                        |                                                |                        |                                                |                         |                                                               |                         |                                                 |           |                                                 |
|------------------------|------------------------------------------------|------------------------|------------------------------------------------|-------------------------|---------------------------------------------------------------|-------------------------|-------------------------------------------------|-----------|-------------------------------------------------|
| 88.0631 <sup>+2</sup>  | y <sub>1</sub> <sup>+2</sup>                   | 497.7149 <sup>+2</sup> | y <sub>9</sub> <sup>+2</sup>                   | 808.3432                | y <sub>8</sub>                                                | 1086.4698               | b <sub>12</sub> -H <sub>3</sub> PO <sub>4</sub> | 1615.6272 | b <sub>16</sub>                                 |
| 131.5791 <sup>+2</sup> | y <sub>2</sub> <sup>+2</sup>                   | 506.2205               | y <sub>4</sub>                                 | 819.3555 <sup>+2</sup>  | y <sub>16</sub> <sup>+2</sup>                                 | 1089.4346 <sup>+2</sup> | MH <sup>+2</sup>                                | 1637.7038 | y <sub>16</sub>                                 |
| 175.119                | y <sub>1</sub>                                 | 533.2334 <sup>+2</sup> | y <sub>10</sub> <sup>+2</sup>                  | 826.2979                | b <sub>8</sub>                                                | 1113.4096               | b <sub>11</sub>                                 | 1672.6487 | b <sub>17</sub>                                 |
| 189.0926 <sup>+2</sup> | y <sub>3</sub> <sup>+2</sup>                   | 541.1654               | b <sub>5</sub>                                 | 857.3636                | b <sub>9</sub> -H <sub>3</sub> PO <sub>4</sub>                | 1136.4967               | y <sub>11</sub>                                 | 1703.7143 | b <sub>18</sub> -H <sub>3</sub> PO <sub>4</sub> |
| 216.0979               | b <sub>2</sub>                                 | 556.2726               | b <sub>6</sub> -H <sub>3</sub> PO <sub>4</sub> | 869.8794 <sup>+2</sup>  | y <sub>17</sub> <sup>+2</sup>                                 | 1184.4467               | b <sub>12</sub>                                 | 1738.7515 | y <sub>17</sub>                                 |
| 253.6139 <sup>+2</sup> | y <sub>4</sub> <sup>+2</sup>                   | 563.242                | y <sub>5</sub>                                 | 898.3901 <sup>+2</sup>  | y <sub>18</sub> <sup>+2</sup>                                 | 1223.5287               | y <sub>12</sub>                                 | 1795.7729 | y <sub>18</sub>                                 |
| 262.151                | y <sub>2</sub>                                 | 568.7520 <sup>+2</sup> | y <sub>11</sub> <sup>+2</sup>                  | 932.9008 <sup>+2</sup>  | y <sub>19</sub> -H <sub>3</sub> PO <sub>4</sub> <sup>+2</sup> | 1272.5491               | b <sub>13</sub> -H <sub>3</sub> PO <sub>4</sub> | 1801.6912 | b <sub>18</sub>                                 |
| 282.1246 <sup>+2</sup> | y <sub>5</sub> <sup>+2</sup>                   | 612.2680 <sup>+2</sup> | y <sub>12</sub> <sup>+2</sup>                  | 944.3956                | b <sub>10</sub> -H <sub>3</sub> PO <sub>4</sub>               | 1352.5713               | y <sub>13</sub>                                 | 1818.7413 | b <sub>19</sub> -H <sub>3</sub> PO <sub>4</sub> |
| 285.1193               | b <sub>3</sub> -H <sub>3</sub> PO <sub>4</sub> | 650.274                | y <sub>6</sub>                                 | 955.3404                | b <sub>9</sub>                                                | 1359.5811               | b <sub>14</sub> -H <sub>3</sub> PO <sub>4</sub> | 1864.7944 | y <sub>19</sub> -H <sub>3</sub> PO <sub>4</sub> |
| 325.6406 <sup>+2</sup> | y <sub>6</sub> <sup>+2</sup>                   | 654.2494               | b <sub>6</sub>                                 | 981.8893 <sup>+2</sup>  | y <sub>19</sub> <sup>+2</sup>                                 | 1370.526                | b <sub>13</sub>                                 | 1905.7733 | b <sub>20</sub> -H <sub>3</sub> PO <sub>4</sub> |
| 342.1408               | b <sub>4</sub> -H <sub>3</sub> PO <sub>4</sub> | 671.2995               | b <sub>7</sub> -H <sub>3</sub> PO <sub>4</sub> | 994.4225                | y <sub>9</sub>                                                | 1409.5928               | y <sub>14</sub>                                 | 1916.7182 | b <sub>19</sub>                                 |
| 361.1592 <sup>+2</sup> | y <sub>7</sub> <sup>+2</sup>                   | 676.7893 <sup>+2</sup> | y <sub>13</sub> <sup>+2</sup>                  | 996.9301 <sup>+2</sup>  | y <sub>20</sub> -H <sub>3</sub> PO <sub>4</sub> <sup>+2</sup> | 1430.6183               | b <sub>15</sub> -H <sub>3</sub> PO <sub>4</sub> | 1962.7713 | y <sub>19</sub>                                 |
| 377.1779               | y <sub>3</sub>                                 | 705.3000 <sup>+2</sup> | y <sub>14</sub> <sup>+2</sup>                  | 1015.4327               | b <sub>11</sub> -H <sub>3</sub> PO <sub>4</sub>               | 1457.558                | b <sub>14</sub>                                 | 1992.853  | y <sub>20</sub> -H <sub>3</sub> PO <sub>4</sub> |
| 383.0962               | b <sub>3</sub>                                 | 721.3111               | y <sub>7</sub>                                 | 1040.4461 <sup>+2</sup> | MH-H <sub>3</sub> PO <sub>4</sub> <sup>+2</sup>               | 1517.6503               | b <sub>16</sub> -H <sub>3</sub> PO <sub>4</sub> | 2003.7502 | b <sub>20</sub>                                 |
| 404.6752 <sup>+2</sup> | y <sub>8</sub> <sup>+2</sup>                   | 728.321                | b <sub>8</sub> -H <sub>3</sub> PO <sub>4</sub> | 1042.3725               | b <sub>10</sub>                                               | 1524.6197               | y <sub>15</sub>                                 | 2079.885  | MH-H <sub>3</sub> PO <sub>4</sub>               |
| 440.1177               | b <sub>4</sub>                                 | 762.8135 <sup>+2</sup> | y <sub>15</sub> <sup>+2</sup>                  | 1045.9186 <sup>+2</sup> | y <sub>20</sub> <sup>+2</sup>                                 | 1528.5952               | b <sub>15</sub>                                 | 2090.8299 | y <sub>20</sub>                                 |
| 443.1885               | b <sub>5</sub> -H <sub>3</sub> PO <sub>4</sub> | 769.2764               | b <sub>7</sub>                                 | 1065.4596               | y <sub>10</sub>                                               | 1574.6718               | b <sub>17</sub> -H <sub>3</sub> PO <sub>4</sub> | 2177.8619 | MH                                              |



MS/MS Fragmentation of FATLsLHDR  
 Found in IPI00290950, Hypothetical protein DKFZp686P0251

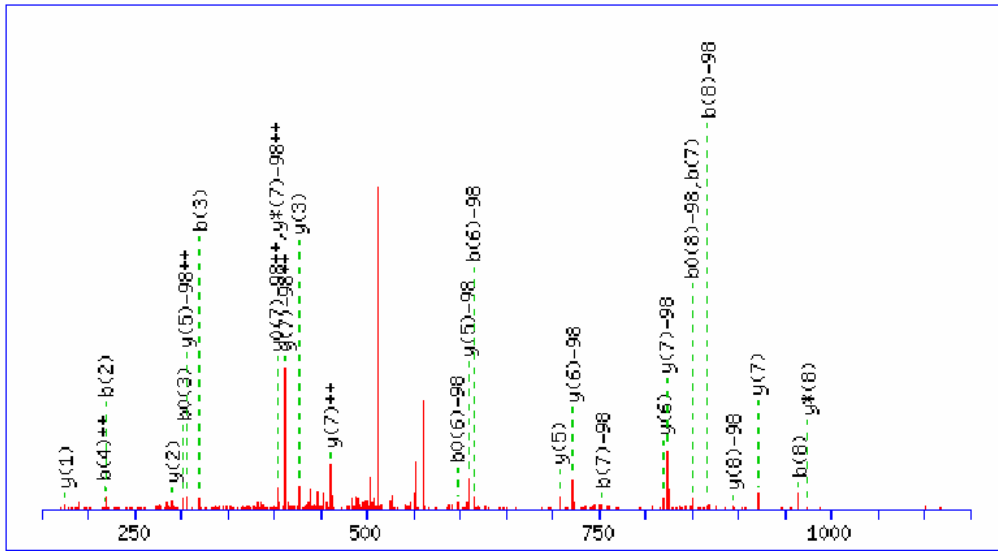

|                        |                                                              |                        |                                                              |                        |                                                              |          |                                                |           |                                                |
|------------------------|--------------------------------------------------------------|------------------------|--------------------------------------------------------------|------------------------|--------------------------------------------------------------|----------|------------------------------------------------|-----------|------------------------------------------------|
| 88.0631 <sup>+2</sup>  | y <sub>1</sub> <sup>+2</sup>                                 | 354.1473 <sup>+2</sup> | y <sub>5</sub> <sup>+2</sup>                                 | 447.7432 <sup>+2</sup> | y <sub>8</sub> -H <sub>3</sub> PO <sub>4</sub> <sup>+2</sup> | 609.3103 | y <sub>5</sub> -H <sub>3</sub> PO <sub>4</sub> | 867.4359  | b <sub>8</sub> -H <sub>3</sub> PO <sub>4</sub> |
| 145.5766 <sup>+2</sup> | y <sub>2</sub> <sup>+2</sup>                                 | 361.7008 <sup>+2</sup> | y <sub>6</sub> -H <sub>3</sub> PO <sub>4</sub> <sup>+2</sup> | 461.2131 <sup>+2</sup> | y <sub>7</sub> <sup>+2</sup>                                 | 615.3501 | b <sub>6</sub> -H <sub>3</sub> PO <sub>4</sub> | 894.4792  | y <sub>8</sub> -H <sub>3</sub> PO <sub>4</sub> |
| 175.119                | y <sub>1</sub>                                               | 376.7081 <sup>+2</sup> | b <sub>7</sub> -H <sub>3</sub> PO <sub>4</sub> <sup>+2</sup> | 483.2101 <sup>+2</sup> | b <sub>8</sub> <sup>+2</sup>                                 | 707.2872 | y <sub>5</sub>                                 | 921.419   | y <sub>7</sub>                                 |
| 214.1060 <sup>+2</sup> | y <sub>3</sub> <sup>+2</sup>                                 | 410.6893 <sup>+2</sup> | y <sub>6</sub> <sup>+2</sup>                                 | 496.7317 <sup>+2</sup> | y <sub>8</sub> <sup>+2</sup>                                 | 713.327  | b <sub>6</sub>                                 | 965.4128  | b <sub>8</sub>                                 |
| 219.1128               | b <sub>2</sub>                                               | 412.2247 <sup>+2</sup> | y <sub>7</sub> -H <sub>3</sub> PO <sub>4</sub> <sup>+2</sup> | 502.266                | b <sub>5</sub> -H <sub>3</sub> PO <sub>4</sub>               | 722.3944 | y <sub>6</sub> -H <sub>3</sub> PO <sub>4</sub> | 992.4561  | y <sub>8</sub>                                 |
| 270.6481 <sup>+2</sup> | y <sub>4</sub> <sup>+2</sup>                                 | 425.6966 <sup>+2</sup> | b <sub>7</sub> <sup>+2</sup>                                 | 521.2774 <sup>+2</sup> | MH-H <sub>3</sub> PO <sub>4</sub> <sup>+2</sup>              | 752.409  | b <sub>7</sub> -H <sub>3</sub> PO <sub>4</sub> | 1041.5476 | MH-H <sub>3</sub> PO <sub>4</sub>              |
| 290.1459               | y <sub>2</sub>                                               | 427.2048               | y <sub>3</sub>                                               | 540.2889               | y <sub>4</sub>                                               | 820.3713 | y <sub>6</sub>                                 | 1139.5245 | MH                                             |
| 305.1588 <sup>+2</sup> | y <sub>5</sub> -H <sub>3</sub> PO <sub>4</sub> <sup>+2</sup> | 433.2445               | b <sub>4</sub>                                               | 570.2659 <sup>+2</sup> | MH <sup>+2</sup>                                             | 823.4421 | y <sub>7</sub> -H <sub>3</sub> PO <sub>4</sub> |           |                                                |
| 320.1605               | b <sub>3</sub>                                               | 434.2216 <sup>+2</sup> | b <sub>8</sub> -H <sub>3</sub> PO <sub>4</sub> <sup>+2</sup> | 600.2429               | b <sub>5</sub>                                               | 850.3859 | b <sub>7</sub>                                 |           |                                                |

MS/MS Fragmentation of LQELASPPAGRptPAPR  
 Found in IPI00174962, Molecule interacting with Rab13

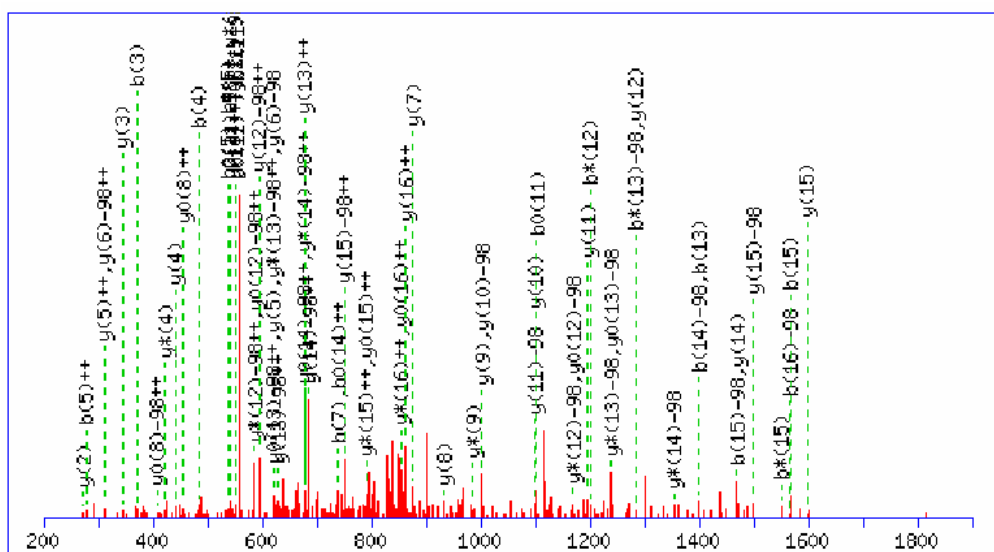

|                        |                                                              |                        |                                                               |                        |                                                               |                        |                                                 |           |                                                 |
|------------------------|--------------------------------------------------------------|------------------------|---------------------------------------------------------------|------------------------|---------------------------------------------------------------|------------------------|-------------------------------------------------|-----------|-------------------------------------------------|
| 88.0631 <sup>+2</sup>  | y <sub>1</sub> <sup>+2</sup>                                 | 466.2291 <sup>+2</sup> | y <sub>8</sub> <sup>+2</sup>                                  | 677.8350 <sup>+2</sup> | y <sub>13</sub> <sup>+2</sup>                                 | 862.9276 <sup>+2</sup> | y <sub>16</sub> <sup>+2</sup>                   | 1300.7008 | b <sub>13</sub> -H <sub>3</sub> PO <sub>4</sub> |
| 136.5895 <sup>+2</sup> | y <sub>2</sub> <sup>+2</sup>                                 | 484.2766               | b <sub>4</sub>                                                | 685.3886 <sup>+2</sup> | y <sub>14</sub> -H <sub>3</sub> PO <sub>4</sub> <sup>+2</sup> | 870.4812 <sup>+2</sup> | MH-H <sub>3</sub> PO <sub>4</sub> <sup>+2</sup> | 1354.6627 | y <sub>13</sub>                                 |
| 172.1081 <sup>+2</sup> | y <sub>3</sub> <sup>+2</sup>                                 | 501.2856 <sup>+2</sup> | y <sub>10</sub> -H <sub>3</sub> PO <sub>4</sub> <sup>+2</sup> | 699.3804 <sup>+2</sup> | b <sub>14</sub> -H <sub>3</sub> PO <sub>4</sub> <sup>+2</sup> | 874.4295               | y <sub>7</sub>                                  | 1369.7699 | y <sub>14</sub> -H <sub>3</sub> PO <sub>4</sub> |
| 175.119                | y <sub>1</sub>                                               | 501.7477 <sup>+2</sup> | y <sub>9</sub> <sup>+2</sup>                                  | 699.8425 <sup>+2</sup> | b <sub>13</sub> <sup>+2</sup>                                 | 904.5112               | y <sub>9</sub> -H <sub>3</sub> PO <sub>4</sub>  | 1397.7536 | b <sub>14</sub> -H <sub>3</sub> PO <sub>4</sub> |
| 220.6344 <sup>+2</sup> | y <sub>4</sub> <sup>+2</sup>                                 | 523.2987               | y <sub>5</sub> -H <sub>3</sub> PO <sub>4</sub>                | 718.3284               | y <sub>6</sub>                                                | 907.4884               | b <sub>9</sub>                                  | 1398.6777 | b <sub>13</sub>                                 |
| 242.1499               | b <sub>2</sub>                                               | 549.8120 <sup>+2</sup> | y <sub>11</sub> -H <sub>3</sub> PO <sub>4</sub> <sup>+2</sup> | 734.3770 <sup>+2</sup> | y <sub>14</sub> <sup>+2</sup>                                 | 919.4696 <sup>+2</sup> | MH <sup>+2</sup>                                | 1467.7468 | y <sub>14</sub>                                 |
| 262.1530 <sup>+2</sup> | y <sub>5</sub> -H <sub>3</sub> PO <sub>4</sub> <sup>+2</sup> | 550.2740 <sup>+2</sup> | y <sub>10</sub> <sup>+2</sup>                                 | 734.8990 <sup>+2</sup> | b <sub>15</sub> -H <sub>3</sub> PO <sub>4</sub> <sup>+2</sup> | 931.4509               | y <sub>8</sub>                                  | 1468.7907 | b <sub>15</sub> -H <sub>3</sub> PO <sub>4</sub> |
| 272.1717               | y <sub>2</sub>                                               | 555.3137               | b <sub>5</sub>                                                | 739.3985               | b <sub>7</sub>                                                | 964.5098               | b <sub>10</sub>                                 | 1495.7305 | b <sub>14</sub>                                 |
| 310.6794 <sup>+2</sup> | y <sub>6</sub> -H <sub>3</sub> PO <sub>4</sub> <sup>+2</sup> | 560.8091 <sup>+2</sup> | b <sub>11</sub> <sup>+2</sup>                                 | 748.3689 <sup>+2</sup> | b <sub>14</sub> <sup>+2</sup>                                 | 1001.5639              | y <sub>10</sub> -H <sub>3</sub> PO <sub>4</sub> | 1498.8125 | y <sub>15</sub> -H <sub>3</sub> PO <sub>4</sub> |
| 311.1414 <sup>+2</sup> | y <sub>5</sub> <sup>+2</sup>                                 | 593.3280 <sup>+2</sup> | y <sub>12</sub> -H <sub>3</sub> PO <sub>4</sub> <sup>+2</sup> | 749.9099 <sup>+2</sup> | y <sub>15</sub> -H <sub>3</sub> PO <sub>4</sub> <sup>+2</sup> | 1002.4881              | y <sub>9</sub>                                  | 1565.8435 | b <sub>16</sub> -H <sub>3</sub> PO <sub>4</sub> |
| 343.2088               | y <sub>3</sub>                                               | 598.8004 <sup>+2</sup> | y <sub>11</sub> <sup>+2</sup>                                 | 776.4526               | y <sub>7</sub> -H <sub>3</sub> PO <sub>4</sub>                | 1098.6167              | y <sub>11</sub> -H <sub>3</sub> PO <sub>4</sub> | 1566.7676 | b <sub>15</sub>                                 |
| 359.6678 <sup>+2</sup> | y <sub>6</sub> <sup>+2</sup>                                 | 609.3355 <sup>+2</sup> | b <sub>12</sub> <sup>+2</sup>                                 | 783.4254 <sup>+2</sup> | b <sub>16</sub> -H <sub>3</sub> PO <sub>4</sub> <sup>+2</sup> | 1099.5408              | y <sub>10</sub>                                 | 1596.7894 | y <sub>15</sub>                                 |
| 371.1925               | b <sub>3</sub>                                               | 620.3515               | y <sub>6</sub> -H <sub>3</sub> PO <sub>4</sub>                | 783.8874 <sup>+2</sup> | b <sub>15</sub> <sup>+2</sup>                                 | 1120.6109              | b <sub>11</sub>                                 | 1626.8711 | y <sub>16</sub> -H <sub>3</sub> PO <sub>4</sub> |
| 388.7299 <sup>+2</sup> | y <sub>7</sub> -H <sub>3</sub> PO <sub>4</sub> <sup>+2</sup> | 621.2756               | y <sub>5</sub>                                                | 798.8983 <sup>+2</sup> | y <sub>15</sub> <sup>+2</sup>                                 | 1185.6487              | y <sub>12</sub> -H <sub>3</sub> PO <sub>4</sub> | 1663.8203 | b <sub>16</sub>                                 |
| 417.2407 <sup>+2</sup> | y <sub>8</sub> -H <sub>3</sub> PO <sub>4</sub> <sup>+2</sup> | 628.8466 <sup>+2</sup> | y <sub>13</sub> -H <sub>3</sub> PO <sub>4</sub> <sup>+2</sup> | 813.9392 <sup>+2</sup> | y <sub>16</sub> -H <sub>3</sub> PO <sub>4</sub> <sup>+2</sup> | 1196.5936              | y <sub>11</sub>                                 | 1724.848  | y <sub>16</sub>                                 |
| 437.7184 <sup>+2</sup> | y <sub>7</sub> <sup>+2</sup>                                 | 642.3164 <sup>+2</sup> | y <sub>12</sub> <sup>+2</sup>                                 | 832.4138 <sup>+2</sup> | b <sub>16</sub> <sup>+2</sup>                                 | 1217.6637              | b <sub>12</sub>                                 | 1739.9551 | MH-H <sub>3</sub> PO <sub>4</sub>               |
| 440.2616               | y <sub>4</sub>                                               | 642.3457               | b <sub>6</sub>                                                | 833.474                | y <sub>8</sub> -H <sub>3</sub> PO <sub>4</sub>                | 1256.6858              | y <sub>13</sub> -H <sub>3</sub> PO <sub>4</sub> | 1837.932  | MH                                              |
| 452.7592 <sup>+2</sup> | y <sub>9</sub> -H <sub>3</sub> PO <sub>4</sub> <sup>+2</sup> | 650.8540 <sup>+2</sup> | b <sub>13</sub> -H <sub>3</sub> PO <sub>4</sub> <sup>+2</sup> | 836.4512               | b <sub>8</sub>                                                | 1283.6256              | y <sub>12</sub>                                 |           |                                                 |

MS/MS Fragmentation of VEQmPQAsPGLAPR  
 Found in IPI00174962, Molecule interacting with Rab13

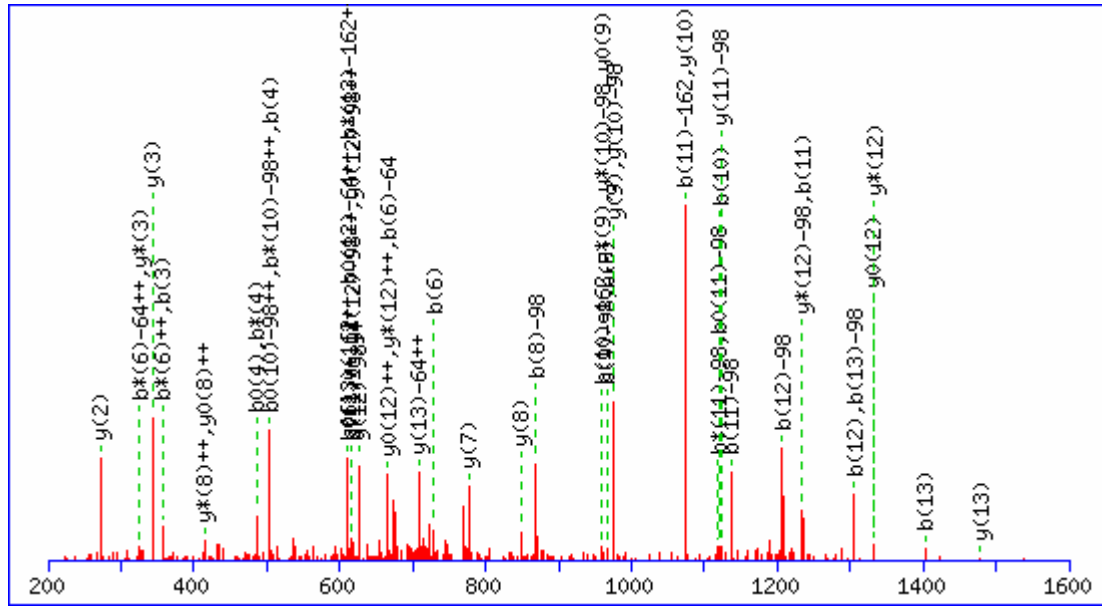

|                        |                                                              |                        |                                                               |                        |                                                               |           |                                                 |           |                                                 |
|------------------------|--------------------------------------------------------------|------------------------|---------------------------------------------------------------|------------------------|---------------------------------------------------------------|-----------|-------------------------------------------------|-----------|-------------------------------------------------|
| 88.0631 <sup>+2</sup>  | y <sub>1</sub> <sup>+2</sup>                                 | 389.1864 <sup>+2</sup> | y <sub>7</sub> <sup>+2</sup>                                  | 625.8191 <sup>+2</sup> | y <sub>12</sub> -H <sub>3</sub> PO <sub>4</sub> <sup>+2</sup> | 878.4843  | y <sub>9</sub> -H <sub>3</sub> PO <sub>4</sub>  | 1234.5174 | b <sub>11</sub>                                 |
| 136.5895 <sup>+2</sup> | y <sub>2</sub> <sup>+2</sup>                                 | 424.7049 <sup>+2</sup> | y <sub>8</sub> <sup>+2</sup>                                  | 674.8076 <sup>+2</sup> | y <sub>12</sub> <sup>+2</sup>                                 | 966.4349  | b <sub>9</sub> -H <sub>3</sub> PO <sub>4</sub>  | 1250.631  | y <sub>12</sub> -H <sub>3</sub> PO <sub>4</sub> |
| 172.1081 <sup>+2</sup> | y <sub>3</sub> <sup>+2</sup>                                 | 439.7458 <sup>+2</sup> | y <sub>9</sub> -H <sub>3</sub> PO <sub>4</sub> <sup>+2</sup>  | 679.3886               | y <sub>7</sub> -H <sub>3</sub> PO <sub>4</sub>                | 967.3591  | b <sub>8</sub>                                  | 1304.6303 | b <sub>13</sub> -H <sub>3</sub> PO <sub>4</sub> |
| 175.119                | y <sub>1</sub>                                               | 456.2929               | y <sub>4</sub>                                                | 690.3404 <sup>+2</sup> | y <sub>13</sub> -H <sub>3</sub> PO <sub>4</sub> <sup>+2</sup> | 975.537   | y <sub>10</sub> -H <sub>3</sub> PO <sub>4</sub> | 1305.5545 | b <sub>12</sub>                                 |
| 228.6501 <sup>+2</sup> | y <sub>4</sub> <sup>+2</sup>                                 | 488.2722 <sup>+2</sup> | y <sub>10</sub> -H <sub>3</sub> PO <sub>4</sub> <sup>+2</sup> | 729.3236               | b <sub>6</sub>                                                | 976.4612  | y <sub>9</sub>                                  | 1348.6079 | y <sub>12</sub>                                 |
| 229.1183               | b <sub>2</sub>                                               | 488.7342 <sup>+2</sup> | y <sub>9</sub> <sup>+2</sup>                                  | 739.3289 <sup>+2</sup> | y <sub>13</sub> <sup>+2</sup>                                 | 1023.4564 | b <sub>10</sub> -H <sub>3</sub> PO <sub>4</sub> | 1379.6736 | y <sub>13</sub> -H <sub>3</sub> PO <sub>4</sub> |
| 257.1608 <sup>+2</sup> | y <sub>5</sub> <sup>+2</sup>                                 | 504.2123               | b <sub>4</sub>                                                | 739.8747 <sup>+2</sup> | MH-H <sub>3</sub> PO <sub>4</sub> <sup>+2</sup>               | 1064.4118 | b <sub>9</sub>                                  | 1402.6072 | b <sub>13</sub>                                 |
| 272.1717               | y <sub>2</sub>                                               | 513.3144               | y <sub>5</sub>                                                | 750.4257               | y <sub>8</sub> -H <sub>3</sub> PO <sub>4</sub>                | 1073.5139 | y <sub>10</sub>                                 | 1477.6505 | y <sub>13</sub>                                 |
| 305.6872 <sup>+2</sup> | y <sub>6</sub> <sup>+2</sup>                                 | 537.2606 <sup>+2</sup> | y <sub>10</sub> <sup>+2</sup>                                 | 777.3655               | y <sub>7</sub>                                                | 1121.4333 | b <sub>10</sub>                                 | 1478.742  | MH-H <sub>3</sub> PO <sub>4</sub>               |
| 340.1979 <sup>+2</sup> | y <sub>7</sub> -H <sub>3</sub> PO <sub>4</sub> <sup>+2</sup> | 561.7899 <sup>+2</sup> | y <sub>11</sub> -H <sub>3</sub> PO <sub>4</sub> <sup>+2</sup> | 788.8631 <sup>+2</sup> | MH <sup>+2</sup>                                              | 1122.5724 | y <sub>11</sub> -H <sub>3</sub> PO <sub>4</sub> | 1576.7189 | MH                                              |
| 343.2088               | y <sub>3</sub>                                               | 601.265                | b <sub>5</sub>                                                | 800.3607               | b <sub>7</sub>                                                | 1136.5405 | b <sub>11</sub> -H <sub>3</sub> PO <sub>4</sub> |           |                                                 |
| 357.1769               | b <sub>3</sub>                                               | 610.3671               | y <sub>6</sub>                                                | 848.4026               | y <sub>8</sub>                                                | 1207.5776 | b <sub>12</sub> -H <sub>3</sub> PO <sub>4</sub> |           |                                                 |
| 375.7165 <sup>+2</sup> | y <sub>8</sub> -H <sub>3</sub> PO <sub>4</sub> <sup>+2</sup> | 610.7783 <sup>+2</sup> | y <sub>11</sub> <sup>+2</sup>                                 | 869.3822               | b <sub>8</sub> -H <sub>3</sub> PO <sub>4</sub>                | 1220.5493 | y <sub>11</sub>                                 |           |                                                 |

MS/MS Fragmentation of GNsDGYIIPINK  
 Found in IPI00017562, Isoform 2 of Latrophilin-2 precursor

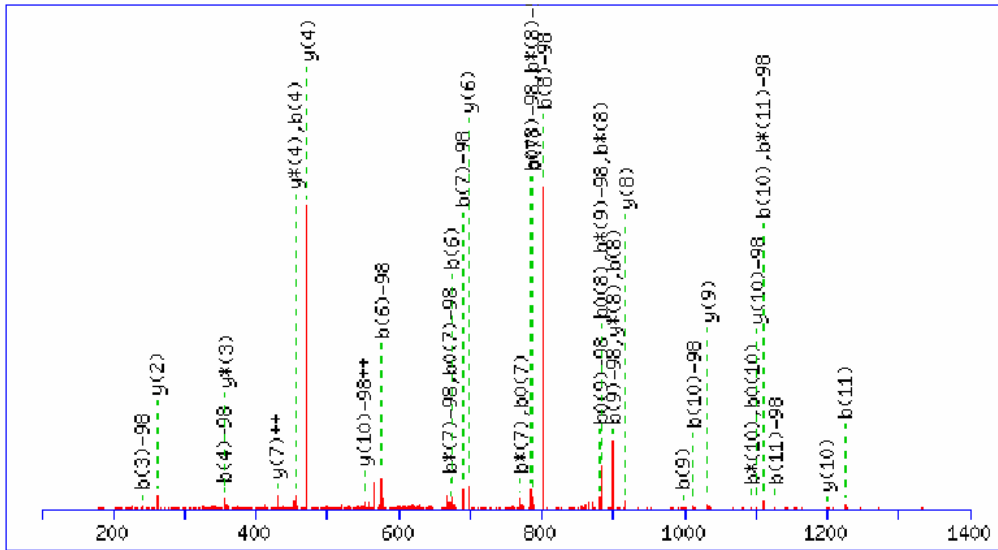

|                        |                                                |                        |                                                |                        |                                                               |           |                                                 |           |                                                 |
|------------------------|------------------------------------------------|------------------------|------------------------------------------------|------------------------|---------------------------------------------------------------|-----------|-------------------------------------------------|-----------|-------------------------------------------------|
| 74.0600 <sup>+2</sup>  | y <sub>1</sub> <sup>+2</sup>                   | 349.2340 <sup>+2</sup> | y <sub>6</sub> <sup>+2</sup>                   | 551.3006 <sup>+2</sup> | y <sub>10</sub> -H <sub>3</sub> PO <sub>4</sub> <sup>+2</sup> | 697.4607  | y <sub>6</sub>                                  | 1101.5939 | y <sub>10</sub> -H <sub>3</sub> PO <sub>4</sub> |
| 131.0815 <sup>+2</sup> | y <sub>2</sub> <sup>+2</sup>                   | 356.1201               | b <sub>4</sub> -H <sub>3</sub> PO <sub>4</sub> | 576.2049               | b <sub>6</sub> -H <sub>3</sub> PO <sub>4</sub>                | 787.2658  | b <sub>7</sub>                                  | 1110.4867 | b <sub>10</sub>                                 |
| 147.1128               | y <sub>1</sub>                                 | 374.2398               | y <sub>3</sub>                                 | 584.3766               | y <sub>5</sub>                                                | 802.373   | b <sub>8</sub> -H <sub>3</sub> PO <sub>4</sub>  | 1126.5527 | b <sub>11</sub> -H <sub>3</sub> PO <sub>4</sub> |
| 172.0717               | b <sub>2</sub>                                 | 413.1415               | b <sub>5</sub> -H <sub>3</sub> PO <sub>4</sub> | 600.2890 <sup>+2</sup> | y <sub>10</sub> <sup>+2</sup>                                 | 860.524   | y <sub>7</sub>                                  | 1199.5708 | y <sub>10</sub>                                 |
| 187.6235 <sup>+2</sup> | y <sub>3</sub> <sup>+2</sup>                   | 430.7656 <sup>+2</sup> | y <sub>7</sub> <sup>+2</sup>                   | 608.3220 <sup>+2</sup> | y <sub>11</sub> -H <sub>3</sub> PO <sub>4</sub> <sup>+2</sup> | 899.4258  | b <sub>9</sub> -H <sub>3</sub> PO <sub>4</sub>  | 1215.6368 | y <sub>11</sub> -H <sub>3</sub> PO <sub>4</sub> |
| 236.1499 <sup>+2</sup> | y <sub>4</sub> <sup>+2</sup>                   | 454.097                | b <sub>4</sub>                                 | 636.8328 <sup>+2</sup> | MH-H <sub>3</sub> PO <sub>4</sub> <sup>+2</sup>               | 900.3499  | b <sub>8</sub>                                  | 1224.5296 | b <sub>11</sub>                                 |
| 241.0931               | b <sub>3</sub> -H <sub>3</sub> PO <sub>4</sub> | 459.2764 <sup>+2</sup> | y <sub>8</sub> <sup>+2</sup>                   | 657.3105 <sup>+2</sup> | y <sub>11</sub> <sup>+2</sup>                                 | 917.5455  | y <sub>8</sub>                                  | 1272.6583 | MH-H <sub>3</sub> PO <sub>4</sub>               |
| 261.1557               | y <sub>2</sub>                                 | 471.2926               | y <sub>4</sub>                                 | 674.1818               | b <sub>6</sub>                                                | 997.4027  | b <sub>9</sub>                                  | 1313.6137 | y <sub>11</sub>                                 |
| 292.6919 <sup>+2</sup> | y <sub>5</sub> <sup>+2</sup>                   | 511.1184               | b <sub>5</sub>                                 | 685.8212 <sup>+2</sup> | MH <sup>+2</sup>                                              | 1012.5098 | b <sub>10</sub> -H <sub>3</sub> PO <sub>4</sub> | 1370.6352 | MH                                              |
| 339.07                 | b <sub>3</sub>                                 | 516.7898 <sup>+2</sup> | y <sub>9</sub> <sup>+2</sup>                   | 689.2889               | b <sub>7</sub> -H <sub>3</sub> PO <sub>4</sub>                | 1032.5724 | y <sub>9</sub>                                  |           |                                                 |

MS/MS Fragmentation of DSLYTsmPNLR  
 Found in IPI00017562, Isoform 2 of Latrophilin-2 precursor

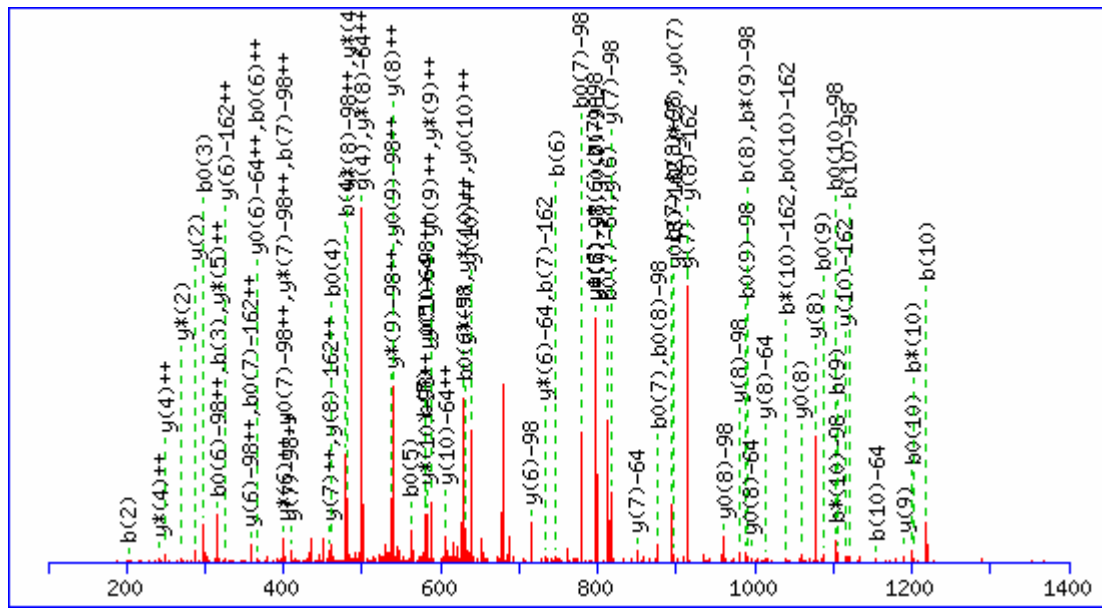

|                        |                                                              |                        |                                                              |                        |                                                               |           |                                                |           |                                                 |
|------------------------|--------------------------------------------------------------|------------------------|--------------------------------------------------------------|------------------------|---------------------------------------------------------------|-----------|------------------------------------------------|-----------|-------------------------------------------------|
| 88.0631 <sup>+2</sup>  | y <sub>1</sub> <sup>+2</sup>                                 | 402.2459               | y <sub>3</sub>                                               | 590.2950 <sup>+2</sup> | y <sub>10</sub> -H <sub>3</sub> PO <sub>4</sub> <sup>+2</sup> | 813.3325  | y <sub>6</sub>                                 | 1105.3908 | b <sub>9</sub>                                  |
| 144.6051 <sup>+2</sup> | y <sub>2</sub> <sup>+2</sup>                                 | 407.1699 <sup>+2</sup> | y <sub>6</sub> <sup>+2</sup>                                 | 595.7674 <sup>+2</sup> | y <sub>9</sub> <sup>+2</sup>                                  | 816.4032  | y <sub>7</sub> -H <sub>3</sub> PO <sub>4</sub> | 1120.4979 | b <sub>10</sub> -H <sub>3</sub> PO <sub>4</sub> |
| 175.119                | y <sub>1</sub>                                               | 408.7053 <sup>+2</sup> | y <sub>7</sub> -H <sub>3</sub> PO <sub>4</sub> <sup>+2</sup> | 639.2834 <sup>+2</sup> | y <sub>10</sub> <sup>+2</sup>                                 | 893.3709  | b <sub>8</sub> -H <sub>3</sub> PO <sub>4</sub> | 1179.5827 | y <sub>10</sub> -H <sub>3</sub> PO <sub>4</sub> |
| 201.6266 <sup>+2</sup> | y <sub>3</sub> <sup>+2</sup>                                 | 457.6937 <sup>+2</sup> | y <sub>7</sub> <sup>+2</sup>                                 | 646.3341               | y <sub>5</sub>                                                | 894.2951  | b <sub>7</sub>                                 | 1190.5275 | y <sub>9</sub>                                  |
| 203.0662               | b <sub>2</sub>                                               | 479.2136               | b <sub>4</sub>                                               | 647.8084 <sup>+2</sup> | MH-H <sub>3</sub> PO <sub>4</sub> <sup>+2</sup>               | 914.3801  | y <sub>7</sub>                                 | 1218.4748 | b <sub>10</sub>                                 |
| 250.1530 <sup>+2</sup> | y <sub>4</sub> <sup>+2</sup>                                 | 490.2369 <sup>+2</sup> | y <sub>8</sub> -H <sub>3</sub> PO <sub>4</sub> <sup>+2</sup> | 649.2828               | b <sub>6</sub> -H <sub>3</sub> PO <sub>4</sub>                | 979.4666  | y <sub>8</sub> -H <sub>3</sub> PO <sub>4</sub> | 1277.5596 | y <sub>10</sub>                                 |
| 288.203                | y <sub>2</sub>                                               | 499.2987               | y <sub>4</sub>                                               | 696.7969 <sup>+2</sup> | MH <sup>+2</sup>                                              | 991.3478  | b <sub>8</sub>                                 | 1294.6096 | MH-H <sub>3</sub> PO <sub>4</sub>               |
| 316.1503               | b <sub>3</sub>                                               | 539.2254 <sup>+2</sup> | y <sub>8</sub> <sup>+2</sup>                                 | 715.3556               | y <sub>6</sub> -H <sub>3</sub> PO <sub>4</sub>                | 1007.4139 | b <sub>9</sub> -H <sub>3</sub> PO <sub>4</sub> | 1392.5865 | MH                                              |
| 323.6707 <sup>+2</sup> | y <sub>5</sub> <sup>+2</sup>                                 | 546.7790 <sup>+2</sup> | y <sub>9</sub> -H <sub>3</sub> PO <sub>4</sub> <sup>+2</sup> | 747.2597               | b <sub>6</sub>                                                | 1077.4435 | y <sub>8</sub>                                 |           |                                                 |
| 358.1814 <sup>+2</sup> | y <sub>6</sub> -H <sub>3</sub> PO <sub>4</sub> <sup>+2</sup> | 580.2613               | b <sub>5</sub>                                               | 796.3182               | b <sub>7</sub> -H <sub>3</sub> PO <sub>4</sub>                | 1092.5506 | y <sub>9</sub> -H <sub>3</sub> PO <sub>4</sub> |           |                                                 |

MS/MS Fragmentation of RVAsALLLR  
 Found in IPI00022240, Isoform 1 of NifU-like N-terminal domain-containing protein,  
 mitochondrial precursor

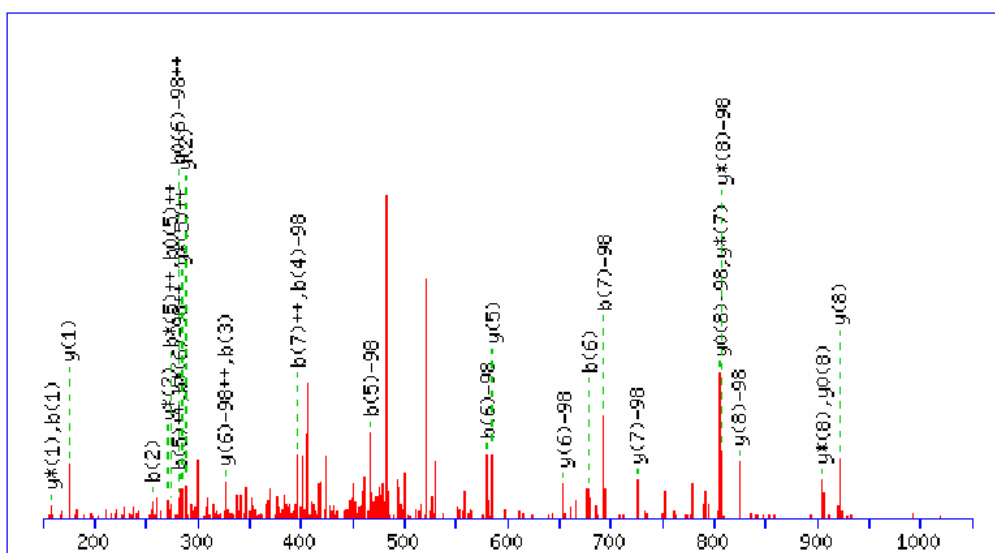

|                        |                                                              |                        |                                                              |                        |                                                              |                        |                                                 |           |                                                |
|------------------------|--------------------------------------------------------------|------------------------|--------------------------------------------------------------|------------------------|--------------------------------------------------------------|------------------------|-------------------------------------------------|-----------|------------------------------------------------|
| 88.0631 <sup>+2</sup>  | y <sub>1</sub> <sup>+2</sup>                                 | 257.6892 <sup>+2</sup> | y <sub>4</sub> <sup>+2</sup>                                 | 376.7069 <sup>+2</sup> | y <sub>6</sub> <sup>+2</sup>                                 | 490.8218 <sup>+2</sup> | MH-H <sub>3</sub> PO <sub>4</sub> <sup>+2</sup> | 725.4668  | y <sub>7</sub> -H <sub>3</sub> PO <sub>4</sub> |
| 128.5920 <sup>+2</sup> | b <sub>2</sub> <sup>+2</sup>                                 | 283.1283 <sup>+2</sup> | b <sub>5</sub> <sup>+2</sup>                                 | 396.2124 <sup>+2</sup> | b <sub>7</sub> <sup>+2</sup>                                 | 494.2123               | b <sub>4</sub>                                  | 752.4066  | y <sub>6</sub>                                 |
| 144.6051 <sup>+2</sup> | y <sub>2</sub> <sup>+2</sup>                                 | 288.203                | y <sub>2</sub>                                               | 396.2354               | b <sub>4</sub> -H <sub>3</sub> PO <sub>4</sub>               | 514.3711               | y <sub>4</sub>                                  | 791.4175  | b <sub>7</sub>                                 |
| 164.1106 <sup>+2</sup> | b <sub>3</sub> <sup>+2</sup>                                 | 290.6819 <sup>+2</sup> | b <sub>6</sub> -H <sub>3</sub> PO <sub>4</sub> <sup>+2</sup> | 401.2871               | y <sub>3</sub>                                               | 539.8103 <sup>+2</sup> | MH <sup>+2</sup>                                | 806.5247  | b <sub>8</sub> -H <sub>3</sub> PO <sub>4</sub> |
| 175.119                | y <sub>1</sub>                                               | 293.2078 <sup>+2</sup> | y <sub>5</sub> <sup>+2</sup>                                 | 403.7660 <sup>+2</sup> | b <sub>8</sub> -H <sub>3</sub> PO <sub>4</sub> <sup>+2</sup> | 565.2494               | b <sub>5</sub>                                  | 823.4437  | y <sub>7</sub>                                 |
| 198.6213 <sup>+2</sup> | b <sub>4</sub> -H <sub>3</sub> PO <sub>4</sub> <sup>+2</sup> | 327.2139               | b <sub>3</sub>                                               | 412.2255 <sup>+2</sup> | y <sub>7</sub> <sup>+2</sup>                                 | 580.3566               | b <sub>6</sub> -H <sub>3</sub> PO <sub>4</sub>  | 824.5352  | y <sub>8</sub> -H <sub>3</sub> PO <sub>4</sub> |
| 201.1472 <sup>+2</sup> | y <sub>3</sub> <sup>+2</sup>                                 | 327.7185 <sup>+2</sup> | y <sub>6</sub> -H <sub>3</sub> PO <sub>4</sub> <sup>+2</sup> | 412.7713 <sup>+2</sup> | y <sub>8</sub> -H <sub>3</sub> PO <sub>4</sub> <sup>+2</sup> | 585.4083               | y <sub>5</sub>                                  | 904.5016  | b <sub>8</sub>                                 |
| 234.1399 <sup>+2</sup> | b <sub>5</sub> -H <sub>3</sub> PO <sub>4</sub> <sup>+2</sup> | 339.6704 <sup>+2</sup> | b <sub>6</sub> <sup>+2</sup>                                 | 452.7544 <sup>+2</sup> | b <sub>8</sub> <sup>+2</sup>                                 | 654.4297               | y <sub>6</sub> -H <sub>3</sub> PO <sub>4</sub>  | 922.5121  | y <sub>8</sub>                                 |
| 247.6098 <sup>+2</sup> | b <sub>4</sub> <sup>+2</sup>                                 | 347.2239 <sup>+2</sup> | b <sub>7</sub> -H <sub>3</sub> PO <sub>4</sub> <sup>+2</sup> | 461.7597 <sup>+2</sup> | y <sub>8</sub> <sup>+2</sup>                                 | 678.3335               | b <sub>6</sub>                                  | 980.6364  | MH-H <sub>3</sub> PO <sub>4</sub>              |
| 256.1768               | b <sub>2</sub>                                               | 363.2371 <sup>+2</sup> | y <sub>7</sub> -H <sub>3</sub> PO <sub>4</sub> <sup>+2</sup> | 467.2725               | b <sub>5</sub> -H <sub>3</sub> PO <sub>4</sub>               | 693.4406               | b <sub>7</sub> -H <sub>3</sub> PO <sub>4</sub>  | 1078.6133 | MH                                             |



MS/MS Fragmentation of LPARELsAPAR  
 Found in IPI00022240, Isoform 1 of NifU-like N-terminal domain-containing protein,  
 mitochondrial precursor

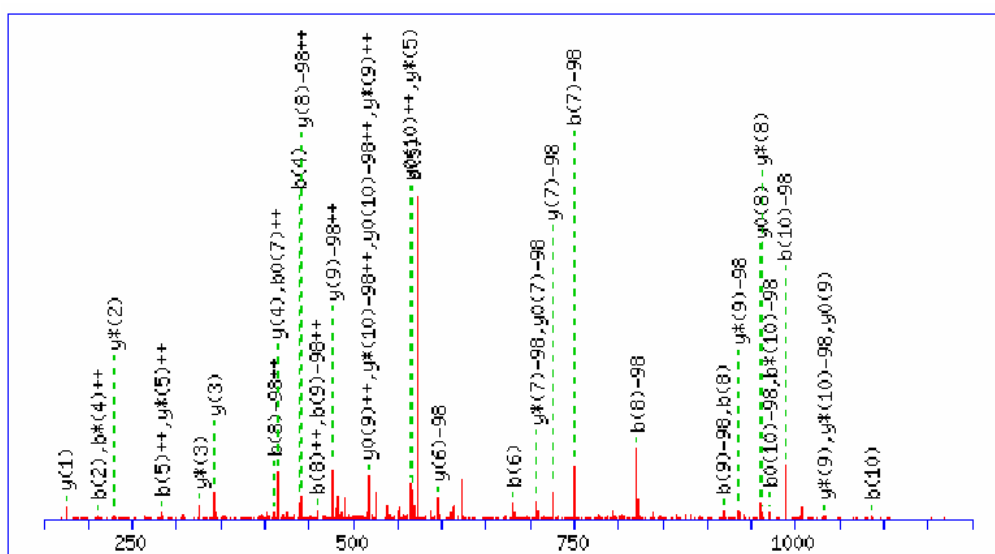

|                        |                                                              |                        |                                                              |                        |                                                               |                        |                                                 |           |                                                 |
|------------------------|--------------------------------------------------------------|------------------------|--------------------------------------------------------------|------------------------|---------------------------------------------------------------|------------------------|-------------------------------------------------|-----------|-------------------------------------------------|
| 88.0631 <sup>+2</sup>  | y <sub>1</sub> <sup>+2</sup>                                 | 298.6794 <sup>+2</sup> | y <sub>6</sub> -H <sub>3</sub> PO <sub>4</sub> <sup>+2</sup> | 459.2638 <sup>+2</sup> | b <sub>9</sub> -H <sub>3</sub> PO <sub>4</sub> <sup>+2</sup>  | 581.2443               | y <sub>5</sub>                                  | 917.5203  | b <sub>9</sub> -H <sub>3</sub> PO <sub>4</sub>  |
| 123.5817 <sup>+2</sup> | y <sub>2</sub> <sup>+2</sup>                                 | 340.7081 <sup>+2</sup> | b <sub>6</sub> <sup>+2</sup>                                 | 459.7259 <sup>+2</sup> | b <sub>8</sub> <sup>+2</sup>                                  | 581.8382 <sup>+2</sup> | MH-H <sub>3</sub> PO <sub>4</sub> <sup>+2</sup> | 918.4445  | b <sub>8</sub>                                  |
| 172.1081 <sup>+2</sup> | y <sub>3</sub> <sup>+2</sup>                                 | 343.2088               | y <sub>3</sub>                                               | 476.7698 <sup>+2</sup> | y <sub>9</sub> -H <sub>3</sub> PO <sub>4</sub> <sup>+2</sup>  | 596.3515               | y <sub>6</sub> -H <sub>3</sub> PO <sub>4</sub>  | 952.5323  | y <sub>9</sub> -H <sub>3</sub> PO <sub>4</sub>  |
| 175.119                | y <sub>1</sub>                                               | 347.6678 <sup>+2</sup> | y <sub>6</sub> <sup>+2</sup>                                 | 483.2674               | y <sub>5</sub> -H <sub>3</sub> PO <sub>4</sub>                | 630.8266 <sup>+2</sup> | MH <sup>+2</sup>                                | 979.4721  | y <sub>8</sub>                                  |
| 207.6266 <sup>+2</sup> | y <sub>4</sub> <sup>+2</sup>                                 | 363.2007 <sup>+2</sup> | y <sub>7</sub> -H <sub>3</sub> PO <sub>4</sub> <sup>+2</sup> | 490.2397 <sup>+2</sup> | y <sub>8</sub> <sup>+2</sup>                                  | 680.409                | b <sub>6</sub>                                  | 988.5574  | b <sub>10</sub> -H <sub>3</sub> PO <sub>4</sub> |
| 211.1441               | b <sub>2</sub>                                               | 375.2189 <sup>+2</sup> | b <sub>7</sub> -H <sub>3</sub> PO <sub>4</sub> <sup>+2</sup> | 494.7824 <sup>+2</sup> | b <sub>10</sub> -H <sub>3</sub> PO <sub>4</sub> <sup>+2</sup> | 694.3284               | y <sub>6</sub>                                  | 1015.4972 | b <sub>9</sub>                                  |
| 219.6448 <sup>+2</sup> | b <sub>4</sub> <sup>+2</sup>                                 | 410.7374 <sup>+2</sup> | b <sub>8</sub> -H <sub>3</sub> PO <sub>4</sub> <sup>+2</sup> | 508.2522 <sup>+2</sup> | b <sub>9</sub> <sup>+2</sup>                                  | 725.3941               | y <sub>7</sub> -H <sub>3</sub> PO <sub>4</sub>  | 1049.5851 | y <sub>10</sub> -H <sub>3</sub> PO <sub>4</sub> |
| 242.1373 <sup>+2</sup> | y <sub>5</sub> -H <sub>3</sub> PO <sub>4</sub> <sup>+2</sup> | 412.1891 <sup>+2</sup> | y <sub>7</sub> <sup>+2</sup>                                 | 525.2962 <sup>+2</sup> | y <sub>10</sub> -H <sub>3</sub> PO <sub>4</sub> <sup>+2</sup> | 749.4304               | b <sub>7</sub> -H <sub>3</sub> PO <sub>4</sub>  | 1050.5092 | y <sub>9</sub>                                  |
| 246.1561               | y <sub>2</sub>                                               | 414.2459               | y <sub>4</sub>                                               | 525.7582 <sup>+2</sup> | y <sub>9</sub> <sup>+2</sup>                                  | 820.4676               | b <sub>8</sub> -H <sub>3</sub> PO <sub>4</sub>  | 1086.5343 | b <sub>10</sub>                                 |
| 282.1812               | b <sub>3</sub>                                               | 424.2073 <sup>+2</sup> | b <sub>7</sub> <sup>+2</sup>                                 | 543.7708 <sup>+2</sup> | b <sub>10</sub> <sup>+2</sup>                                 | 823.371                | y <sub>7</sub>                                  | 1147.5619 | y <sub>10</sub>                                 |
| 284.1661 <sup>+2</sup> | b <sub>5</sub> <sup>+2</sup>                                 | 438.2823               | b <sub>4</sub>                                               | 567.3249               | b <sub>5</sub>                                                | 847.4073               | b <sub>7</sub>                                  | 1162.6691 | MH-H <sub>3</sub> PO <sub>4</sub>               |
| 291.1258 <sup>+2</sup> | y <sub>5</sub> <sup>+2</sup>                                 | 441.2512 <sup>+2</sup> | y <sub>8</sub> -H <sub>3</sub> PO <sub>4</sub> <sup>+2</sup> | 574.2846 <sup>+2</sup> | y <sub>10</sub> <sup>+2</sup>                                 | 881.4952               | y <sub>8</sub> -H <sub>3</sub> PO <sub>4</sub>  | 1260.646  | MH                                              |

MS/MS Fragmentation of StQSLSLQR  
 Found in IPI00398347, PREDICTED: hypothetical protein

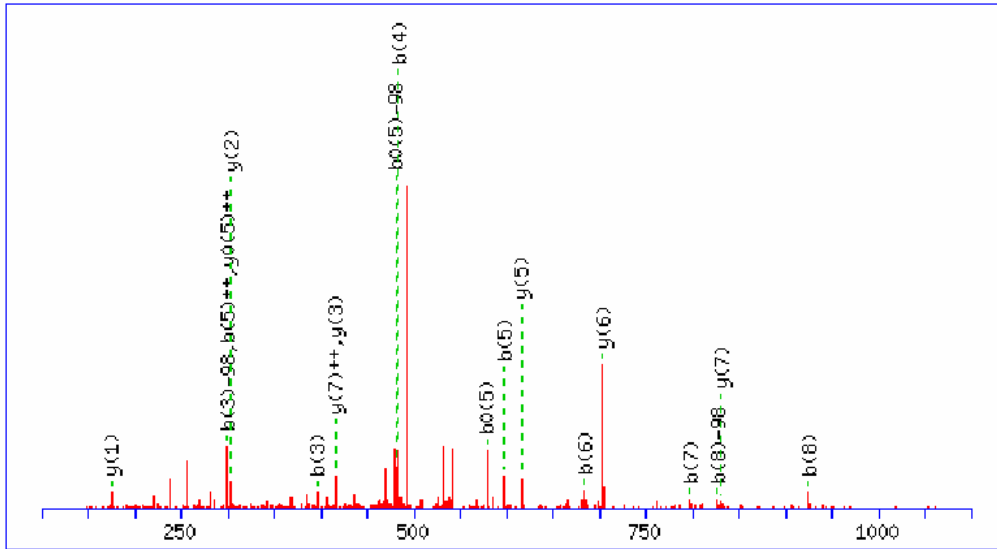

|                        |                                                |                        |                                                              |                        |                                                 |          |                                                |           |                                   |
|------------------------|------------------------------------------------|------------------------|--------------------------------------------------------------|------------------------|-------------------------------------------------|----------|------------------------------------------------|-----------|-----------------------------------|
| 88.0631 <sup>+2</sup>  | y <sub>1</sub> <sup>+2</sup>                   | 303.1775               | y <sub>2</sub>                                               | 484.1439               | b <sub>4</sub>                                  | 616.3777 | y <sub>5</sub>                                 | 925.4027  | b <sub>8</sub>                    |
| 152.0924 <sup>+2</sup> | y <sub>2</sub> <sup>+2</sup>                   | 308.6925 <sup>+2</sup> | y <sub>5</sub> <sup>+2</sup>                                 | 499.2511               | b <sub>5</sub> -H <sub>3</sub> PO <sub>4</sub>  | 684.26   | b <sub>6</sub>                                 | 1001.5374 | MH-H <sub>3</sub> PO <sub>4</sub> |
| 171.0764               | b <sub>2</sub> -H <sub>3</sub> PO <sub>4</sub> | 352.2085 <sup>+2</sup> | y <sub>6</sub> <sup>+2</sup>                                 | 501.2724 <sup>+2</sup> | MH-H <sub>3</sub> PO <sub>4</sub> <sup>+2</sup> | 699.3672 | b <sub>7</sub> -H <sub>3</sub> PO <sub>4</sub> | 1012.4823 | y <sub>8</sub>                    |
| 175.119                | y <sub>1</sub>                                 | 386.167                | b <sub>4</sub> -H <sub>3</sub> PO <sub>4</sub>               | 503.2936               | y <sub>4</sub>                                  | 703.4097 | y <sub>6</sub>                                 | 1099.5143 | MH                                |
| 208.6344 <sup>+2</sup> | y <sub>3</sub> <sup>+2</sup>                   | 397.1119               | b <sub>3</sub>                                               | 506.7448 <sup>+2</sup> | y <sub>8</sub> <sup>+2</sup>                    | 797.3441 | b <sub>7</sub>                                 |           |                                   |
| 252.1504 <sup>+2</sup> | y <sub>4</sub> <sup>+2</sup>                   | 416.2378 <sup>+2</sup> | y <sub>7</sub> <sup>+2</sup>                                 | 550.2608 <sup>+2</sup> | MH <sup>+2</sup>                                | 827.4258 | b <sub>8</sub> -H <sub>3</sub> PO <sub>4</sub> |           |                                   |
| 269.0533               | b <sub>2</sub>                                 | 416.2616               | y <sub>3</sub>                                               | 586.2831               | b <sub>6</sub> -H <sub>3</sub> PO <sub>4</sub>  | 831.4683 | y <sub>7</sub>                                 |           |                                   |
| 299.135                | b <sub>3</sub> -H <sub>3</sub> PO <sub>4</sub> | 457.7563 <sup>+2</sup> | y <sub>8</sub> -H <sub>3</sub> PO <sub>4</sub> <sup>+2</sup> | 597.228                | b <sub>5</sub>                                  | 914.5054 | y <sub>8</sub> -H <sub>3</sub> PO <sub>4</sub> |           |                                   |

MS/MS Fragmentation of SFLQsLECLR  
 Found in IPI00398347, PREDICTED: hypothetical protein

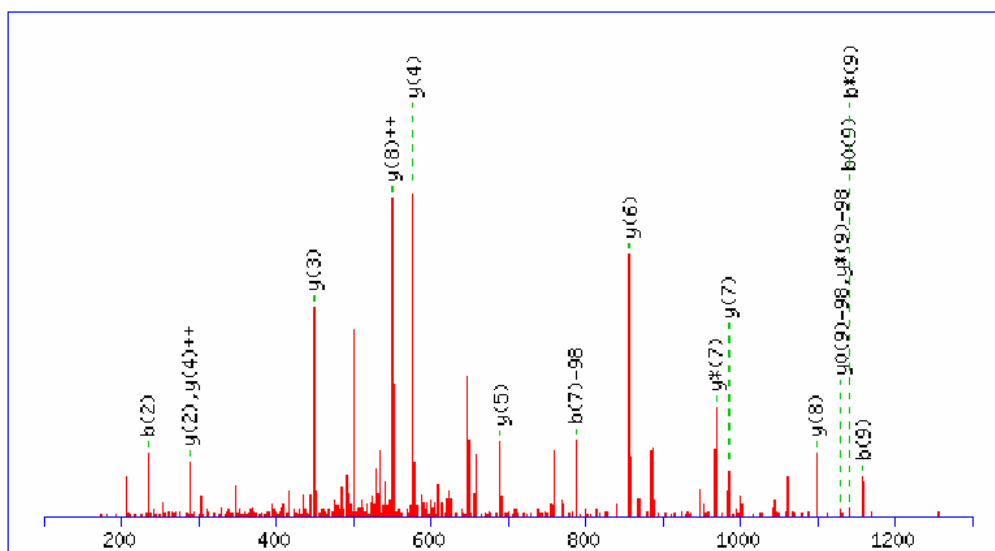

|                        |                              |                        |                                                              |                        |                                                              |          |                                                |           |                                                |
|------------------------|------------------------------|------------------------|--------------------------------------------------------------|------------------------|--------------------------------------------------------------|----------|------------------------------------------------|-----------|------------------------------------------------|
| 88.0631 <sup>+2</sup>  | y <sub>1</sub> <sup>+2</sup> | 351.6838 <sup>+2</sup> | y <sub>6</sub> -H <sub>3</sub> PO <sub>4</sub> <sup>+2</sup> | 545.2718               | b <sub>5</sub> -H <sub>3</sub> PO <sub>4</sub>               | 756.3328 | b <sub>6</sub>                                 | 1003.4917 | b <sub>9</sub> -H <sub>3</sub> PO <sub>4</sub> |
| 144.6051 <sup>+2</sup> | y <sub>2</sub> <sup>+2</sup> | 391.2122               | y <sub>3</sub>                                               | 545.7893 <sup>+2</sup> | y <sub>9</sub> -H <sub>3</sub> PO <sub>4</sub> <sup>+2</sup> | 787.3985 | b <sub>7</sub> -H <sub>3</sub> PO <sub>4</sub> | 1041.4799 | y <sub>8</sub>                                 |
| 175.119                | y <sub>1</sub>               | 400.6722 <sup>+2</sup> | y <sub>6</sub> <sup>+2</sup>                                 | 589.3053 <sup>+2</sup> | MH-H <sub>3</sub> PO <sub>4</sub> <sup>+2</sup>              | 800.3372 | y <sub>6</sub>                                 | 1090.5714 | y <sub>9</sub> -H <sub>3</sub> PO <sub>4</sub> |
| 196.1097 <sup>+2</sup> | y <sub>3</sub> <sup>+2</sup> | 415.7131 <sup>+2</sup> | y <sub>7</sub> -H <sub>3</sub> PO <sub>4</sub> <sup>+2</sup> | 594.7778 <sup>+2</sup> | y <sub>9</sub> <sup>+2</sup>                                 | 830.4189 | y <sub>7</sub> -H <sub>3</sub> PO <sub>4</sub> | 1101.4686 | b <sub>9</sub>                                 |
| 235.1077               | b <sub>2</sub>               | 464.7015 <sup>+2</sup> | y <sub>7</sub> <sup>+2</sup>                                 | 633.3389               | y <sub>5</sub>                                               | 885.3754 | b <sub>7</sub>                                 | 1177.6034 | MH-H <sub>3</sub> PO <sub>4</sub>              |
| 260.6310 <sup>+2</sup> | y <sub>4</sub> <sup>+2</sup> | 472.2551 <sup>+2</sup> | y <sub>8</sub> -H <sub>3</sub> PO <sub>4</sub> <sup>+2</sup> | 638.2938 <sup>+2</sup> | MH <sup>+2</sup>                                             | 890.4077 | b <sub>8</sub> -H <sub>3</sub> PO <sub>4</sub> | 1188.5483 | y <sub>9</sub>                                 |
| 288.203                | y <sub>2</sub>               | 476.2504               | b <sub>4</sub>                                               | 643.2487               | b <sub>5</sub>                                               | 928.3958 | y <sub>7</sub>                                 | 1275.5803 | MH                                             |
| 317.1731 <sup>+2</sup> | y <sub>5</sub> <sup>+2</sup> | 520.2548               | y <sub>4</sub>                                               | 658.3559               | b <sub>6</sub> -H <sub>3</sub> PO <sub>4</sub>               | 943.503  | y <sub>8</sub> -H <sub>3</sub> PO <sub>4</sub> |           |                                                |
| 348.1918               | b <sub>3</sub>               | 521.2436 <sup>+2</sup> | y <sub>8</sub> <sup>+2</sup>                                 | 702.3603               | y <sub>6</sub> -H <sub>3</sub> PO <sub>4</sub>               | 988.3846 | b <sub>8</sub>                                 |           |                                                |

MS/MS Fragmentation of LRNsLDSSSDSDSAL  
 Found in IPI00398347, PREDICTED: hypothetical protein

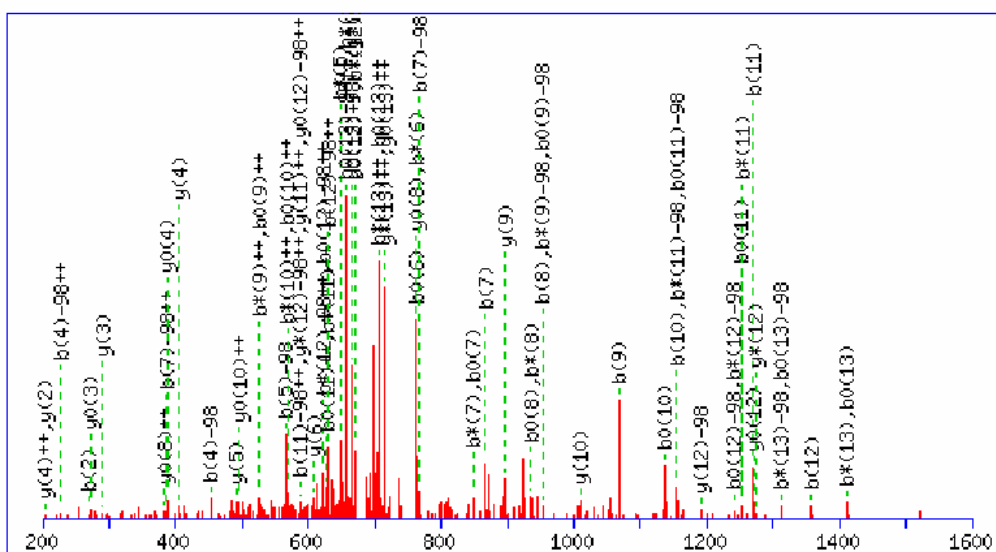

|                        |                                  |                        |                                     |                        |                                        |           |                                |           |                                   |
|------------------------|----------------------------------|------------------------|-------------------------------------|------------------------|----------------------------------------|-----------|--------------------------------|-----------|-----------------------------------|
| 132.1019               | $y_1$                            | 405.198                | $y_4$                               | 630.2786 <sup>+2</sup> | $b_{12}\text{-H}_3\text{PO}_4^{+2}$    | 781.321   | $y_8$                          | 1259.5498 | $b_{12}\text{-H}_3\text{PO}_4$    |
| 135.5999 <sup>+2</sup> | $b_2^{+2}$                       | 428.2196 <sup>+2</sup> | $b_8\text{-H}_3\text{PO}_4^{+2}$    | 635.7510 <sup>+2</sup> | $b_{11}^{+2}$                          | 855.4319  | $b_8\text{-H}_3\text{PO}_4$    | 1270.4947 | $b_{11}$                          |
| 192.6213 <sup>+2</sup> | $b_3^{+2}$                       | 433.6920 <sup>+2</sup> | $b_7^{+2}$                          | 664.3178               | $b_5$                                  | 866.3768  | $b_7$                          | 1290.4733 | $y_{12}$                          |
| 203.139                | $y_2$                            | 453.2568               | $b_4\text{-H}_3\text{PO}_4$         | 665.7971 <sup>+2</sup> | $b_{13}\text{-H}_3\text{PO}_4^{+2}$    | 896.348   | $y_9$                          | 1330.587  | $b_{13}\text{-H}_3\text{PO}_4$    |
| 227.1321 <sup>+2</sup> | $b_4\text{-H}_3\text{PO}_4^{+2}$ | 477.2080 <sup>+2</sup> | $b_8^{+2}$                          | 674.8024 <sup>+2</sup> | $y_{13}\text{-H}_3\text{PO}_4^{+2}$    | 953.4088  | $b_8$                          | 1348.5975 | $y_{13}\text{-H}_3\text{PO}_4$    |
| 270.1925               | $b_2$                            | 485.7331 <sup>+2</sup> | $b_9\text{-H}_3\text{PO}_4^{+2}$    | 679.2670 <sup>+2</sup> | $b_{12}^{+2}$                          | 970.4588  | $b_9\text{-H}_3\text{PO}_4$    | 1357.5267 | $b_{12}$                          |
| 276.1205 <sup>+2</sup> | $b_4^{+2}$                       | 492.23                 | $y_5$                               | 681.3678               | $b_6\text{-H}_3\text{PO}_4$            | 1009.432  | $y_{10}$                       | 1428.5639 | $b_{13}$                          |
| 283.6741 <sup>+2</sup> | $b_5\text{-H}_3\text{PO}_4^{+2}$ | 529.2491 <sup>+2</sup> | $b_{10}\text{-H}_3\text{PO}_4^{+2}$ | 694.289                | $y_7$                                  | 1057.4909 | $b_{10}\text{-H}_3\text{PO}_4$ | 1446.5744 | $y_{13}$                          |
| 290.171                | $y_3$                            | 534.7215 <sup>+2</sup> | $b_9^{+2}$                          | 714.7856 <sup>+2</sup> | $b_{13}^{+2}$                          | 1068.4357 | $b_9$                          | 1461.6816 | $\text{MH}\text{-H}_3\text{PO}_4$ |
| 332.6625 <sup>+2</sup> | $b_5^{+2}$                       | 551.2337               | $b_4$                               | 723.7908 <sup>+2</sup> | $y_{13}^{+2}$                          | 1078.4535 | $y_{11}\text{-H}_3\text{PO}_4$ | 1559.6585 | $\text{MH}$                       |
| 341.1876 <sup>+2</sup> | $b_6\text{-H}_3\text{PO}_4^{+2}$ | 566.3409               | $b_5\text{-H}_3\text{PO}_4$         | 731.3444 <sup>+2</sup> | $\text{MH}\text{-H}_3\text{PO}_4^{+2}$ | 1155.4678 | $b_{10}$                       |           |                                   |
| 384.2354               | $b_3$                            | 578.2375 <sup>+2</sup> | $b_{10}^{+2}$                       | 768.3999               | $b_7\text{-H}_3\text{PO}_4$            | 1172.5178 | $b_{11}\text{-H}_3\text{PO}_4$ |           |                                   |
| 384.7036 <sup>+2</sup> | $b_7\text{-H}_3\text{PO}_4^{+2}$ | 586.7625 <sup>+2</sup> | $b_{11}\text{-H}_3\text{PO}_4^{+2}$ | 779.3447               | $b_6$                                  | 1176.4304 | $y_{11}$                       |           |                                   |
| 390.1760 <sup>+2</sup> | $b_6^{+2}$                       | 607.257                | $y_6$                               | 780.3329 <sup>+2</sup> | $\text{MH}^{+2}$                       | 1192.4964 | $y_{12}\text{-H}_3\text{PO}_4$ |           |                                   |

MS/MS Fragmentation of VLDTSSLTQSAPAsPTNK  
 Found in IPI00166044, Isoform 1 of Regulatory-associated protein of mTOR

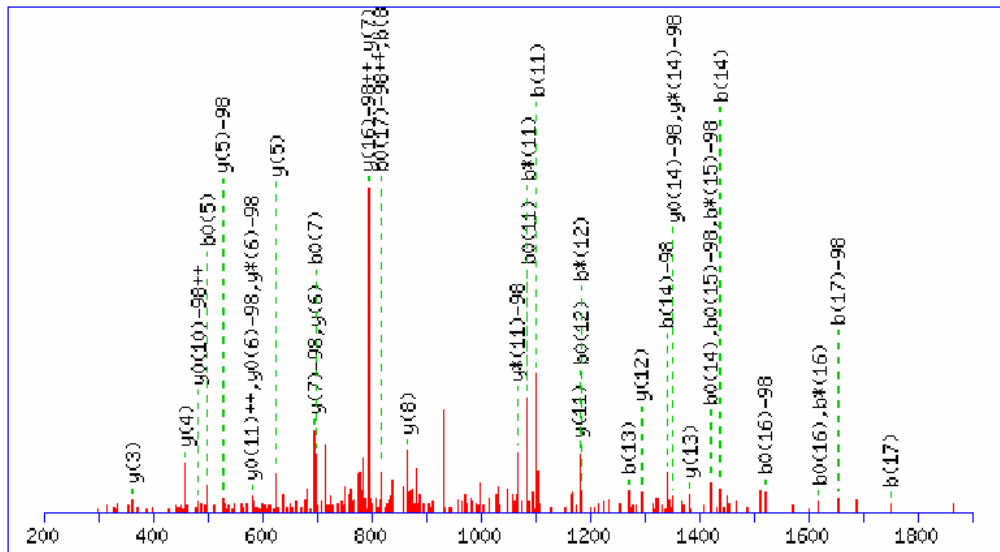

|                        |                                                              |                        |                                                               |                        |                                                               |                        |                                                 |           |                                                 |
|------------------------|--------------------------------------------------------------|------------------------|---------------------------------------------------------------|------------------------|---------------------------------------------------------------|------------------------|-------------------------------------------------|-----------|-------------------------------------------------|
| 74.0600 <sup>+2</sup>  | y <sub>1</sub> <sup>+2</sup>                                 | 429.2344               | b <sub>4</sub>                                                | 691.3216 <sup>+2</sup> | y <sub>13</sub> <sup>+2</sup>                                 | 945.4888               | b <sub>9</sub>                                  | 1437.722  | b <sub>15</sub> -H <sub>3</sub> PO <sub>4</sub> |
| 131.0815 <sup>+2</sup> | y <sub>2</sub> <sup>+2</sup>                                 | 433.1944 <sup>+2</sup> | y <sub>8</sub> <sup>+2</sup>                                  | 696.3675               | y <sub>7</sub> -H <sub>3</sub> PO <sub>4</sub>                | 948.9512 <sup>+2</sup> | MH <sup>+2</sup>                                | 1438.6461 | b <sub>14</sub>                                 |
| 147.1128               | y <sub>1</sub>                                               | 459.2562               | y <sub>4</sub>                                                | 697.2916               | y <sub>6</sub>                                                | 952.4136               | y <sub>9</sub>                                  | 1468.6679 | y <sub>14</sub>                                 |
| 181.6053 <sup>+2</sup> | y <sub>3</sub> <sup>+2</sup>                                 | 476.7104 <sup>+2</sup> | y <sub>9</sub> <sup>+2</sup>                                  | 716.3825               | b <sub>7</sub>                                                | 982.4952               | y <sub>10</sub> -H <sub>3</sub> PO <sub>4</sub> | 1471.7387 | y <sub>15</sub> -H <sub>3</sub> PO <sub>4</sub> |
| 213.1598               | b <sub>2</sub>                                               | 491.7513 <sup>+2</sup> | y <sub>10</sub> -H <sub>3</sub> PO <sub>4</sub> <sup>+2</sup> | 734.8376 <sup>+2</sup> | y <sub>14</sub> <sup>+2</sup>                                 | 1032.5208              | b <sub>10</sub>                                 | 1535.6989 | b <sub>15</sub>                                 |
| 230.1317 <sup>+2</sup> | y <sub>4</sub> <sup>+2</sup>                                 | 516.2664               | b <sub>5</sub>                                                | 736.3730 <sup>+2</sup> | y <sub>15</sub> -H <sub>3</sub> PO <sub>4</sub> <sup>+2</sup> | 1080.4721              | y <sub>10</sub>                                 | 1538.7697 | b <sub>16</sub> -H <sub>3</sub> PO <sub>4</sub> |
| 261.1557               | y <sub>2</sub>                                               | 528.2776               | y <sub>5</sub> -H <sub>3</sub> PO <sub>4</sub>                | 767.4046               | y <sub>8</sub> -H <sub>3</sub> PO <sub>4</sub>                | 1083.5429              | y <sub>11</sub> -H <sub>3</sub> PO <sub>4</sub> | 1569.7156 | y <sub>15</sub>                                 |
| 264.6425 <sup>+2</sup> | y <sub>5</sub> -H <sub>3</sub> PO <sub>4</sub> <sup>+2</sup> | 540.7397 <sup>+2</sup> | y <sub>10</sub> <sup>+2</sup>                                 | 785.3614 <sup>+2</sup> | y <sub>15</sub> <sup>+2</sup>                                 | 1103.5579              | b <sub>11</sub>                                 | 1586.7657 | y <sub>16</sub> -H <sub>3</sub> PO <sub>4</sub> |
| 300.1610 <sup>+2</sup> | y <sub>6</sub> -H <sub>3</sub> PO <sub>4</sub> <sup>+2</sup> | 542.2751 <sup>+2</sup> | y <sub>11</sub> -H <sub>3</sub> PO <sub>4</sub> <sup>+2</sup> | 793.8865 <sup>+2</sup> | y <sub>16</sub> -H <sub>3</sub> PO <sub>4</sub> <sup>+2</sup> | 1181.5198              | y <sub>11</sub>                                 | 1636.7466 | b <sub>16</sub>                                 |
| 313.6309 <sup>+2</sup> | y <sub>5</sub> <sup>+2</sup>                                 | 591.2635 <sup>+2</sup> | y <sub>11</sub> <sup>+2</sup>                                 | 794.3444               | y <sub>7</sub>                                                | 1196.627               | y <sub>12</sub> -H <sub>3</sub> PO <sub>4</sub> | 1652.8126 | b <sub>17</sub> -H <sub>3</sub> PO <sub>4</sub> |
| 328.1867               | b <sub>3</sub>                                               | 598.8171 <sup>+2</sup> | y <sub>12</sub> -H <sub>3</sub> PO <sub>4</sub> <sup>+2</sup> | 817.4302               | b <sub>8</sub>                                                | 1200.6107              | b <sub>12</sub>                                 | 1684.7426 | y <sub>16</sub>                                 |
| 348.6874 <sup>+2</sup> | y <sub>7</sub> -H <sub>3</sub> PO <sub>4</sub> <sup>+2</sup> | 599.3148               | y <sub>6</sub> -H <sub>3</sub> PO <sub>4</sub>                | 842.8749 <sup>+2</sup> | y <sub>16</sub> <sup>+2</sup>                                 | 1271.6478              | b <sub>13</sub>                                 | 1699.8497 | y <sub>17</sub> -H <sub>3</sub> PO <sub>4</sub> |
| 349.1495 <sup>+2</sup> | y <sub>6</sub> <sup>+2</sup>                                 | 603.2984               | b <sub>6</sub>                                                | 850.4285 <sup>+2</sup> | y <sub>17</sub> -H <sub>3</sub> PO <sub>4</sub> <sup>+2</sup> | 1283.659               | y <sub>13</sub> -H <sub>3</sub> PO <sub>4</sub> | 1750.7895 | b <sub>17</sub>                                 |
| 362.2034               | y <sub>3</sub>                                               | 626.2545               | y <sub>5</sub>                                                | 854.4367               | y <sub>9</sub> -H <sub>3</sub> PO <sub>4</sub>                | 1294.6039              | y <sub>12</sub>                                 | 1797.8266 | y <sub>17</sub>                                 |
| 384.2060 <sup>+2</sup> | y <sub>8</sub> -H <sub>3</sub> PO <sub>4</sub> <sup>+2</sup> | 642.3331 <sup>+2</sup> | y <sub>13</sub> -H <sub>3</sub> PO <sub>4</sub> <sup>+2</sup> | 865.3815               | y <sub>8</sub>                                                | 1340.6692              | b <sub>14</sub> -H <sub>3</sub> PO <sub>4</sub> | 1798.9181 | MH-H <sub>3</sub> PO <sub>4</sub>               |
| 397.6758 <sup>+2</sup> | y <sub>7</sub> <sup>+2</sup>                                 | 647.8056 <sup>+2</sup> | y <sub>12</sub> <sup>+2</sup>                                 | 899.4169 <sup>+2</sup> | y <sub>17</sub> <sup>+2</sup>                                 | 1370.691               | y <sub>14</sub> -H <sub>3</sub> PO <sub>4</sub> | 1896.895  | MH                                              |
| 427.7220 <sup>+2</sup> | y <sub>9</sub> -H <sub>3</sub> PO <sub>4</sub> <sup>+2</sup> | 685.8492 <sup>+2</sup> | y <sub>14</sub> -H <sub>3</sub> PO <sub>4</sub> <sup>+2</sup> | 899.9627 <sup>+2</sup> | MH-H <sub>3</sub> PO <sub>4</sub> <sup>+2</sup>               | 1381.6359              | y <sub>13</sub>                                 |           |                                                 |

MS/MS Fragmentation of VLDTSSLTQsAPASPTNK  
 Found in IPI00166044, Isoform 1 of Regulatory-associated protein of mTOR

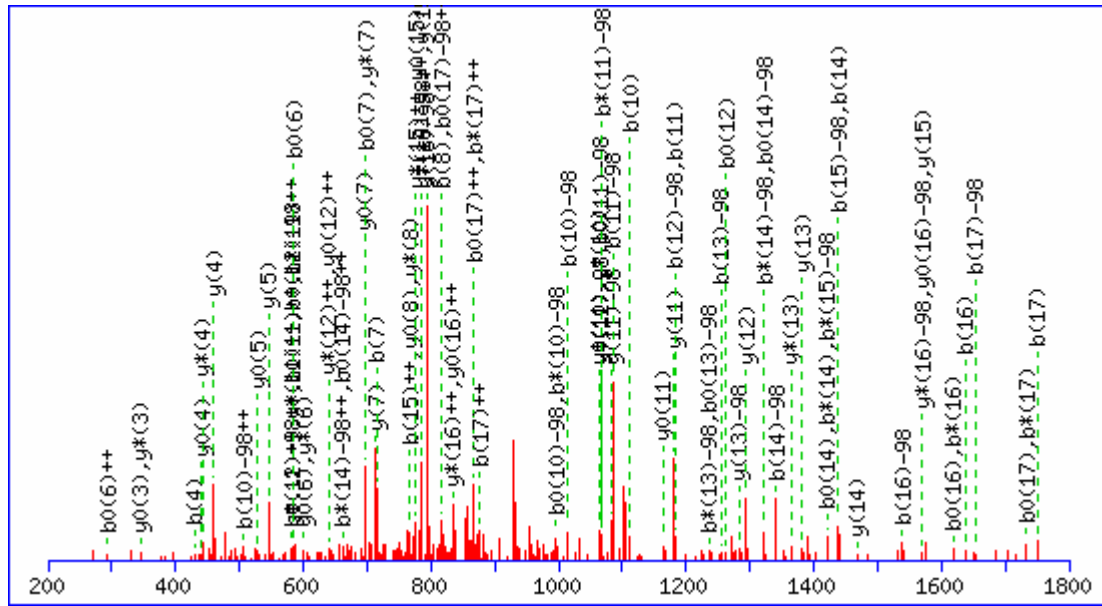

|                        |                                                              |                        |                                                               |                        |                                                               |           |                                                 |           |                                                 |
|------------------------|--------------------------------------------------------------|------------------------|---------------------------------------------------------------|------------------------|---------------------------------------------------------------|-----------|-------------------------------------------------|-----------|-------------------------------------------------|
| 74.0600 <sup>+2</sup>  | y <sub>1</sub> <sup>+2</sup>                                 | 476.7104 <sup>+2</sup> | y <sub>9</sub> <sup>+2</sup>                                  | 734.8376 <sup>+2</sup> | y <sub>14</sub> <sup>+2</sup>                                 | 1080.4721 | y <sub>10</sub>                                 | 1437.722  | b <sub>15</sub> -H <sub>3</sub> PO <sub>4</sub> |
| 131.0815 <sup>+2</sup> | y <sub>2</sub> <sup>+2</sup>                                 | 491.7513 <sup>+2</sup> | y <sub>10</sub> -H <sub>3</sub> PO <sub>4</sub> <sup>+2</sup> | 736.3730 <sup>+2</sup> | y <sub>15</sub> -H <sub>3</sub> PO <sub>4</sub> <sup>+2</sup> | 1083.5429 | y <sub>11</sub> -H <sub>3</sub> PO <sub>4</sub> | 1438.6461 | b <sub>14</sub>                                 |
| 147.1128               | y <sub>1</sub>                                               | 516.2664               | b <sub>5</sub>                                                | 785.3614 <sup>+2</sup> | y <sub>15</sub> <sup>+2</sup>                                 | 1085.5473 | b <sub>11</sub> -H <sub>3</sub> PO <sub>4</sub> | 1468.6679 | y <sub>14</sub>                                 |
| 181.6053 <sup>+2</sup> | y <sub>3</sub> <sup>+2</sup>                                 | 540.7397 <sup>+2</sup> | y <sub>10</sub> <sup>+2</sup>                                 | 785.4152               | y <sub>8</sub>                                                | 1112.4871 | b <sub>10</sub>                                 | 1471.7387 | y <sub>15</sub> -H <sub>3</sub> PO <sub>4</sub> |
| 213.1598               | b <sub>2</sub>                                               | 542.2751 <sup>+2</sup> | y <sub>11</sub> -H <sub>3</sub> PO <sub>4</sub> <sup>+2</sup> | 793.8865 <sup>+2</sup> | y <sub>16</sub> -H <sub>3</sub> PO <sub>4</sub> <sup>+2</sup> | 1181.5198 | y <sub>11</sub>                                 | 1535.6989 | b <sub>15</sub>                                 |
| 230.1317 <sup>+2</sup> | y <sub>4</sub> <sup>+2</sup>                                 | 546.2882               | y <sub>5</sub>                                                | 817.4302               | b <sub>8</sub>                                                | 1182.6001 | b <sub>12</sub> -H <sub>3</sub> PO <sub>4</sub> | 1538.7697 | b <sub>16</sub> -H <sub>3</sub> PO <sub>4</sub> |
| 261.1557               | y <sub>2</sub>                                               | 591.2635 <sup>+2</sup> | y <sub>11</sub> <sup>+2</sup>                                 | 842.8749 <sup>+2</sup> | y <sub>16</sub> <sup>+2</sup>                                 | 1183.5242 | b <sub>11</sub>                                 | 1569.7156 | y <sub>15</sub>                                 |
| 273.6477 <sup>+2</sup> | y <sub>5</sub> <sup>+2</sup>                                 | 598.8171 <sup>+2</sup> | y <sub>12</sub> -H <sub>3</sub> PO <sub>4</sub> <sup>+2</sup> | 850.4285 <sup>+2</sup> | y <sub>17</sub> -H <sub>3</sub> PO <sub>4</sub> <sup>+2</sup> | 1196.627  | y <sub>12</sub> -H <sub>3</sub> PO <sub>4</sub> | 1586.7657 | y <sub>16</sub> -H <sub>3</sub> PO <sub>4</sub> |
| 309.1663 <sup>+2</sup> | y <sub>6</sub> <sup>+2</sup>                                 | 603.2984               | b <sub>6</sub>                                                | 854.4367               | y <sub>9</sub> -H <sub>3</sub> PO <sub>4</sub>                | 1253.6372 | b <sub>13</sub> -H <sub>3</sub> PO <sub>4</sub> | 1636.7466 | b <sub>16</sub>                                 |
| 328.1867               | b <sub>3</sub>                                               | 617.3253               | y <sub>6</sub>                                                | 899.4169 <sup>+2</sup> | y <sub>17</sub> <sup>+2</sup>                                 | 1280.577  | b <sub>12</sub>                                 | 1652.8126 | b <sub>17</sub> -H <sub>3</sub> PO <sub>4</sub> |
| 357.6927 <sup>+2</sup> | y <sub>7</sub> <sup>+2</sup>                                 | 642.3331 <sup>+2</sup> | y <sub>13</sub> -H <sub>3</sub> PO <sub>4</sub> <sup>+2</sup> | 899.9627 <sup>+2</sup> | MH-H <sub>3</sub> PO <sub>4</sub> <sup>+2</sup>               | 1283.659  | y <sub>13</sub> -H <sub>3</sub> PO <sub>4</sub> | 1684.7426 | y <sub>16</sub>                                 |
| 362.2034               | y <sub>3</sub>                                               | 647.8056 <sup>+2</sup> | y <sub>12</sub> <sup>+2</sup>                                 | 945.4888               | b <sub>9</sub>                                                | 1294.6039 | y <sub>12</sub>                                 | 1699.8497 | y <sub>17</sub> -H <sub>3</sub> PO <sub>4</sub> |
| 393.2112 <sup>+2</sup> | y <sub>8</sub> <sup>+2</sup>                                 | 685.8492 <sup>+2</sup> | y <sub>14</sub> -H <sub>3</sub> PO <sub>4</sub> <sup>+2</sup> | 948.9512 <sup>+2</sup> | MH <sup>+2</sup>                                              | 1340.6692 | b <sub>14</sub> -H <sub>3</sub> PO <sub>4</sub> | 1750.7895 | b <sub>17</sub>                                 |
| 427.7220 <sup>+2</sup> | y <sub>9</sub> -H <sub>3</sub> PO <sub>4</sub> <sup>+2</sup> | 691.3216 <sup>+2</sup> | y <sub>13</sub> <sup>+2</sup>                                 | 952.4136               | y <sub>9</sub>                                                | 1351.6141 | b <sub>13</sub>                                 | 1797.8266 | y <sub>17</sub>                                 |
| 429.2344               | b <sub>4</sub>                                               | 714.3781               | y <sub>7</sub>                                                | 982.4952               | y <sub>10</sub> -H <sub>3</sub> PO <sub>4</sub>               | 1370.691  | y <sub>14</sub> -H <sub>3</sub> PO <sub>4</sub> | 1798.9181 | MH-H <sub>3</sub> PO <sub>4</sub>               |
| 459.2562               | y <sub>4</sub>                                               | 716.3825               | b <sub>7</sub>                                                | 1014.5102              | b <sub>10</sub> -H <sub>3</sub> PO <sub>4</sub>               | 1381.6359 | y <sub>13</sub>                                 | 1896.895  | MH                                              |

MS/MS Fragmentation of GGSISVQVNSIKFDsE  
 Found in IPI00216654, Isoform Beta of Nucleolar phosphoprotein p130

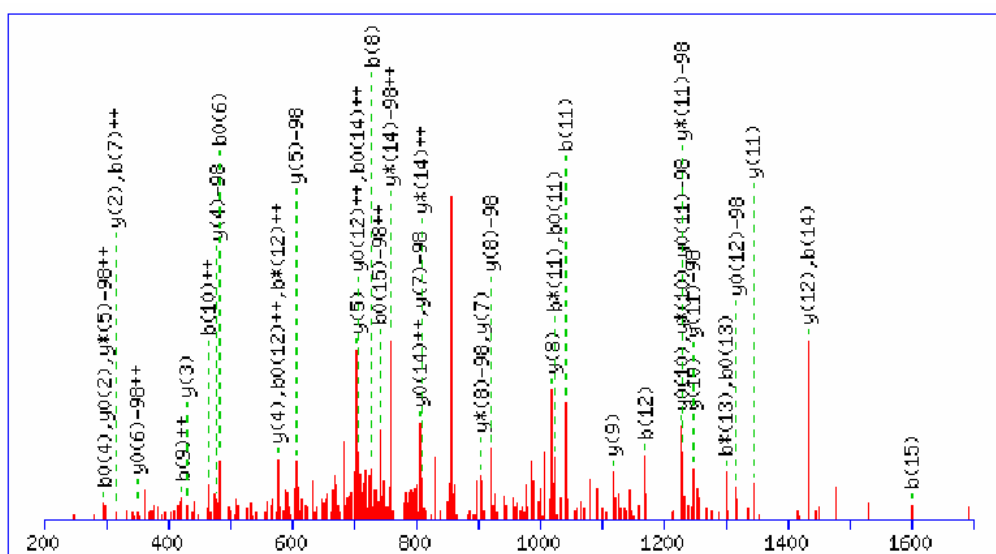

|                        |                                                               |                        |                                                                |                        |                                                                |                        |                                                    |           |                                                   |
|------------------------|---------------------------------------------------------------|------------------------|----------------------------------------------------------------|------------------------|----------------------------------------------------------------|------------------------|----------------------------------------------------|-----------|---------------------------------------------------|
| 115.0502               | <b>b<sub>2</sub></b>                                          | 461.2193 <sup>+2</sup> | <b>y<sub>8</sub>-H<sub>3</sub>PO<sub>4</sub><sup>+2</sup></b>  | 673.3054 <sup>+2</sup> | <b>y<sub>11</sub><sup>+2</sup></b>                             | 824.9125 <sup>+2</sup> | <b>MH-H<sub>3</sub>PO<sub>4</sub><sup>+2</sup></b> | 1317.7161 | <b>b<sub>13</sub></b>                             |
| 148.0604               | <b>y<sub>1</sub></b>                                          | 479.1773               | <b>y<sub>4</sub>-H<sub>3</sub>PO<sub>4</sub></b>               | 705.2491               | <b>y<sub>5</sub></b>                                           | 842.4367               | <b>b<sub>9</sub></b>                               | 1334.6587 | <b>y<sub>12</sub>-H<sub>3</sub>PO<sub>4</sub></b> |
| 202.0822               | <b>b<sub>3</sub></b>                                          | 501.2667               | <b>b<sub>6</sub></b>                                           | 716.8214 <sup>+2</sup> | <b>y<sub>12</sub><sup>+2</sup></b>                             | 845.3902 <sup>+2</sup> | <b>y<sub>15</sub><sup>+2</sup></b>                 | 1345.6035 | <b>y<sub>11</sub></b>                             |
| 217.0819               | <b>y<sub>2</sub>-H<sub>3</sub>PO<sub>4</sub></b>              | 510.2077 <sup>+2</sup> | <b>y<sub>8</sub><sup>+2</sup></b>                              | 716.8752 <sup>+2</sup> | <b>b<sub>14</sub><sup>+2</sup></b>                             | 873.9009 <sup>+2</sup> | <b>MH<sup>+2</sup></b>                             | 1432.6356 | <b>y<sub>12</sub></b>                             |
| 304.1397 <sup>+2</sup> | <b>y<sub>5</sub>-H<sub>3</sub>PO<sub>4</sub><sup>+2</sup></b> | 510.7535 <sup>+2</sup> | <b>y<sub>9</sub>-H<sub>3</sub>PO<sub>4</sub><sup>+2</sup></b>  | 720.3563               | <b>y<sub>6</sub>-H<sub>3</sub>PO<sub>4</sub></b>               | 905.3652               | <b>y<sub>7</sub></b>                               | 1432.7431 | <b>b<sub>14</sub></b>                             |
| 315.0588               | <b>y<sub>2</sub></b>                                          | 559.7419 <sup>+2</sup> | <b>y<sub>9</sub><sup>+2</sup></b>                              | 724.3750 <sup>+2</sup> | <b>y<sub>13</sub>-H<sub>3</sub>PO<sub>4</sub><sup>+2</sup></b> | 921.4312               | <b>y<sub>8</sub>-H<sub>3</sub>PO<sub>4</sub></b>   | 1447.7427 | <b>y<sub>13</sub>-H<sub>3</sub>PO<sub>4</sub></b> |
| 315.1663               | <b>b<sub>4</sub></b>                                          | 574.7828 <sup>+2</sup> | <b>y<sub>10</sub>-H<sub>3</sub>PO<sub>4</sub><sup>+2</sup></b> | 728.3937               | <b>b<sub>8</sub></b>                                           | 929.4687               | <b>b<sub>10</sub></b>                              | 1501.7645 | <b>b<sub>15</sub>-H<sub>3</sub>PO<sub>4</sub></b> |
| 332.1088               | <b>y<sub>3</sub>-H<sub>3</sub>PO<sub>4</sub></b>              | 577.1541               | <b>y<sub>4</sub></b>                                           | 751.3859 <sup>+2</sup> | <b>b<sub>15</sub>-H<sub>3</sub>PO<sub>4</sub><sup>+2</sup></b> | 1019.4081              | <b>y<sub>8</sub></b>                               | 1534.7748 | <b>y<sub>14</sub>-H<sub>3</sub>PO<sub>4</sub></b> |
| 353.1282 <sup>+2</sup> | <b>y<sub>5</sub><sup>+2</sup></b>                             | 585.8275 <sup>+2</sup> | <b>b<sub>12</sub><sup>+2</sup></b>                             | 767.8910 <sup>+2</sup> | <b>y<sub>14</sub>-H<sub>3</sub>PO<sub>4</sub><sup>+2</sup></b> | 1020.4997              | <b>y<sub>9</sub>-H<sub>3</sub>PO<sub>4</sub></b>   | 1545.7196 | <b>y<sub>13</sub></b>                             |
| 360.6818 <sup>+2</sup> | <b>y<sub>6</sub>-H<sub>3</sub>PO<sub>4</sub><sup>+2</sup></b> | 607.2722               | <b>y<sub>5</sub>-H<sub>3</sub>PO<sub>4</sub></b>               | 773.3635 <sup>+2</sup> | <b>y<sub>13</sub><sup>+2</sup></b>                             | 1042.5527              | <b>b<sub>11</sub></b>                              | 1591.7962 | <b>y<sub>15</sub>-H<sub>3</sub>PO<sub>4</sub></b> |
| 402.1983               | <b>b<sub>5</sub></b>                                          | 623.7712 <sup>+2</sup> | <b>y<sub>10</sub><sup>+2</sup></b>                             | 796.4018 <sup>+2</sup> | <b>y<sub>15</sub>-H<sub>3</sub>PO<sub>4</sub><sup>+2</sup></b> | 1118.4765              | <b>y<sub>9</sub></b>                               | 1599.7414 | <b>b<sub>15</sub></b>                             |
| 404.1978 <sup>+2</sup> | <b>y<sub>7</sub>-H<sub>3</sub>PO<sub>4</sub><sup>+2</sup></b> | 624.3170 <sup>+2</sup> | <b>y<sub>11</sub>-H<sub>3</sub>PO<sub>4</sub><sup>+2</sup></b> | 800.3744 <sup>+2</sup> | <b>b<sub>15</sub><sup>+2</sup></b>                             | 1148.5582              | <b>y<sub>10</sub>-H<sub>3</sub>PO<sub>4</sub></b>  | 1632.7517 | <b>y<sub>14</sub></b>                             |
| 409.6702 <sup>+2</sup> | <b>y<sub>6</sub><sup>+2</sup></b>                             | 629.3253               | <b>b<sub>7</sub></b>                                           | 807.3883               | <b>y<sub>7</sub>-H<sub>3</sub>PO<sub>4</sub></b>               | 1170.6477              | <b>b<sub>12</sub></b>                              | 1648.8177 | <b>MH-H<sub>3</sub>PO<sub>4</sub></b>             |
| 430.0857               | <b>y<sub>3</sub></b>                                          | 659.3617 <sup>+2</sup> | <b>b<sub>13</sub><sup>+2</sup></b>                             | 816.8795 <sup>+2</sup> | <b>y<sub>14</sub><sup>+2</sup></b>                             | 1246.5351              | <b>y<sub>10</sub></b>                              | 1689.7731 | <b>y<sub>15</sub></b>                             |
| 453.1862 <sup>+2</sup> | <b>y<sub>7</sub><sup>+2</sup></b>                             | 667.8330 <sup>+2</sup> | <b>y<sub>12</sub>-H<sub>3</sub>PO<sub>4</sub><sup>+2</sup></b> | 818.3332               | <b>y<sub>6</sub></b>                                           | 1247.6266              | <b>y<sub>11</sub>-H<sub>3</sub>PO<sub>4</sub></b>  | 1746.7946 | <b>MH</b>                                         |

MS/MS Fragmentation of ANsDIISLNFR  
 Found in IPI00478176, hypothetical protein LOC90362

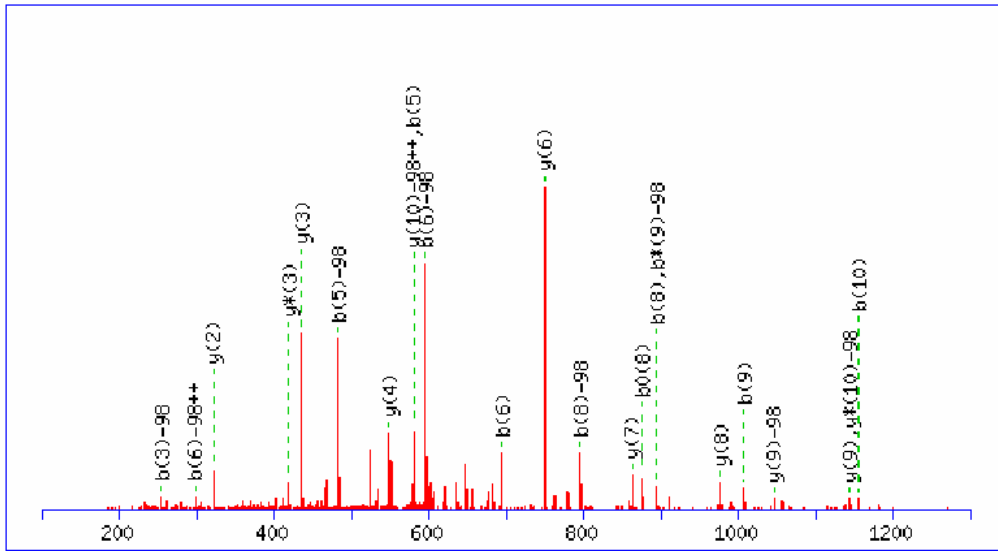

|                        |                                                |                        |                                                              |                        |                                                               |          |                                                |           |                                                 |
|------------------------|------------------------------------------------|------------------------|--------------------------------------------------------------|------------------------|---------------------------------------------------------------|----------|------------------------------------------------|-----------|-------------------------------------------------|
| 88.0631 <sup>+2</sup>  | y <sub>1</sub> <sup>+2</sup>                   | 353.0857               | b <sub>3</sub>                                               | 549.3144               | y <sub>4</sub>                                                | 683.3359 | b <sub>7</sub> -H <sub>3</sub> PO <sub>4</sub> | 1008.4398 | b <sub>9</sub>                                  |
| 161.5973 <sup>+2</sup> | y <sub>2</sub> <sup>+2</sup>                   | 370.1357               | b <sub>4</sub> -H <sub>3</sub> PO <sub>4</sub>               | 572.7735 <sup>+2</sup> | y <sub>9</sub> <sup>+2</sup>                                  | 694.2807 | b <sub>6</sub>                                 | 1046.5629 | y <sub>9</sub> -H <sub>3</sub> PO <sub>4</sub>  |
| 175.119                | y <sub>1</sub>                                 | 375.2189 <sup>+2</sup> | y <sub>6</sub> <sup>+2</sup>                                 | 580.8066 <sup>+2</sup> | y <sub>10</sub> -H <sub>3</sub> PO <sub>4</sub> <sup>+2</sup> | 749.4304 | y <sub>6</sub>                                 | 1057.5313 | b <sub>10</sub> -H <sub>3</sub> PO <sub>4</sub> |
| 186.0873               | b <sub>2</sub>                                 | 431.7609 <sup>+2</sup> | y <sub>7</sub> <sup>+2</sup>                                 | 581.1967               | b <sub>5</sub>                                                | 781.3128 | b <sub>7</sub>                                 | 1144.5398 | y <sub>9</sub>                                  |
| 218.6188 <sup>+2</sup> | y <sub>3</sub> <sup>+2</sup>                   | 436.2303               | y <sub>3</sub>                                               | 596.3039               | b <sub>6</sub> -H <sub>3</sub> PO <sub>4</sub>                | 796.4199 | b <sub>8</sub> -H <sub>3</sub> PO <sub>4</sub> | 1155.5082 | b <sub>10</sub>                                 |
| 255.1088               | b <sub>3</sub> -H <sub>3</sub> PO <sub>4</sub> | 468.1126               | b <sub>4</sub>                                               | 616.3251 <sup>+2</sup> | MH-H <sub>3</sub> PO <sub>4</sub> <sup>+2</sup>               | 862.5145 | y <sub>7</sub>                                 | 1160.6058 | y <sub>10</sub> -H <sub>3</sub> PO <sub>4</sub> |
| 275.1608 <sup>+2</sup> | y <sub>4</sub> <sup>+2</sup>                   | 483.2198               | b <sub>5</sub> -H <sub>3</sub> PO <sub>4</sub>               | 629.7950 <sup>+2</sup> | y <sub>10</sub> <sup>+2</sup>                                 | 894.3968 | b <sub>8</sub>                                 | 1231.643  | MH-H <sub>3</sub> PO <sub>4</sub>               |
| 318.6768 <sup>+2</sup> | y <sub>5</sub> <sup>+2</sup>                   | 489.2744 <sup>+2</sup> | y <sub>8</sub> <sup>+2</sup>                                 | 636.3464               | y <sub>5</sub>                                                | 910.4629 | b <sub>9</sub> -H <sub>3</sub> PO <sub>4</sub> | 1258.5827 | y <sub>10</sub>                                 |
| 322.1874               | y <sub>2</sub>                                 | 523.7851 <sup>+2</sup> | y <sub>9</sub> -H <sub>3</sub> PO <sub>4</sub> <sup>+2</sup> | 665.3136 <sup>+2</sup> | MH <sup>+2</sup>                                              | 977.5415 | y <sub>8</sub>                                 | 1329.6199 | MH                                              |



MS/MS Fragmentation of PCSEETPAIsPSKR  
 Found in IPI00375015, Isoform DUT-N of Deoxyuridine 5'-triphosphate nucleotidohydrolase  
 , mitochondrial precursor

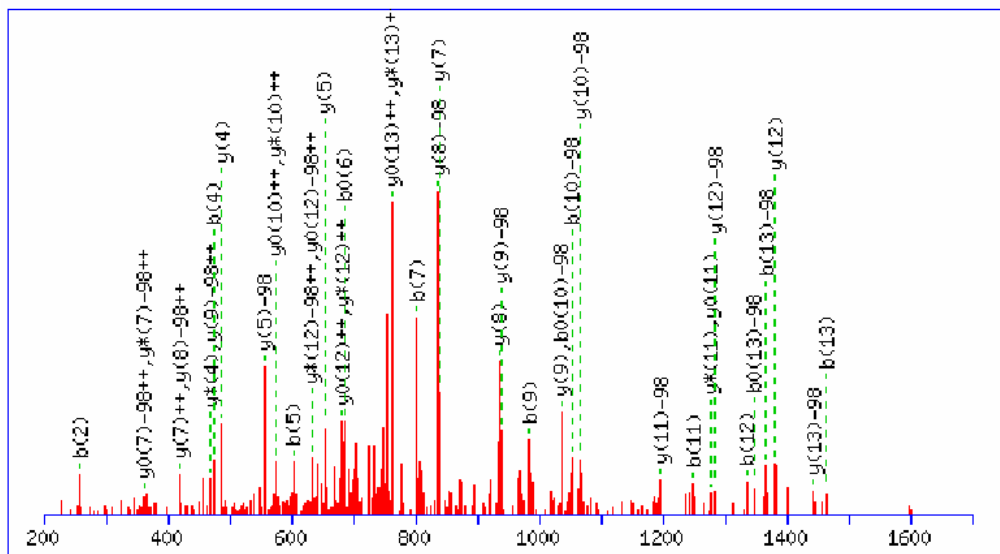

|                        |                                                              |                        |                                                               |                        |                                                               |           |                                                 |           |                                                 |
|------------------------|--------------------------------------------------------------|------------------------|---------------------------------------------------------------|------------------------|---------------------------------------------------------------|-----------|-------------------------------------------------|-----------|-------------------------------------------------|
| 88.0631 <sup>+2</sup>  | y <sub>1</sub> <sup>+2</sup>                                 | 417.1438               | b <sub>4</sub>                                                | 647.8056 <sup>+2</sup> | y <sub>11</sub> <sup>+2</sup>                                 | 837.4941  | y <sub>8</sub> -H <sub>3</sub> PO <sub>4</sub>  | 1279.4912 | b <sub>12</sub>                                 |
| 152.1106 <sup>+2</sup> | y <sub>2</sub> <sup>+2</sup>                                 | 419.2507 <sup>+2</sup> | y <sub>8</sub> -H <sub>3</sub> PO <sub>4</sub> <sup>+2</sup>  | 654.2971               | y <sub>5</sub>                                                | 838.4182  | y <sub>7</sub>                                  | 1283.659  | y <sub>12</sub> -H <sub>3</sub> PO <sub>4</sub> |
| 175.119                | y <sub>1</sub>                                               | 419.7128 <sup>+2</sup> | y <sub>7</sub> <sup>+2</sup>                                  | 655.3083 <sup>+2</sup> | b <sub>13</sub> -H <sub>3</sub> PO <sub>4</sub> <sup>+2</sup> | 928.4081  | b <sub>9</sub>                                  | 1294.6039 | y <sub>11</sub>                                 |
| 195.6266 <sup>+2</sup> | y <sub>3</sub> <sup>+2</sup>                                 | 468.2391 <sup>+2</sup> | y <sub>8</sub> <sup>+2</sup>                                  | 669.4042               | y <sub>6</sub> -H <sub>3</sub> PO <sub>4</sub>                | 935.471   | y <sub>8</sub>                                  | 1309.6093 | b <sub>13</sub> -H <sub>3</sub> PO <sub>4</sub> |
| 201.0692               | b <sub>2</sub>                                               | 469.7745 <sup>+2</sup> | y <sub>9</sub> -H <sub>3</sub> PO <sub>4</sub> <sup>+2</sup>  | 691.3216 <sup>+2</sup> | y <sub>12</sub> <sup>+2</sup>                                 | 938.5418  | y <sub>9</sub> -H <sub>3</sub> PO <sub>4</sub>  | 1381.6359 | y <sub>12</sub>                                 |
| 244.1530 <sup>+2</sup> | y <sub>4</sub> <sup>+2</sup>                                 | 487.2987               | y <sub>4</sub>                                                | 693.8377 <sup>+2</sup> | y <sub>13</sub> -H <sub>3</sub> PO <sub>4</sub> <sup>+2</sup> | 997.4295  | b <sub>10</sub> -H <sub>3</sub> PO <sub>4</sub> | 1386.6682 | y <sub>13</sub> -H <sub>3</sub> PO <sub>4</sub> |
| 278.6637 <sup>+2</sup> | y <sub>5</sub> -H <sub>3</sub> PO <sub>4</sub> <sup>+2</sup> | 518.7630 <sup>+2</sup> | y <sub>9</sub> <sup>+2</sup>                                  | 704.2967 <sup>+2</sup> | b <sub>13</sub> <sup>+2</sup>                                 | 1036.5187 | y <sub>9</sub>                                  | 1407.5862 | b <sub>13</sub>                                 |
| 288.1013               | b <sub>3</sub>                                               | 534.2958 <sup>+2</sup> | y <sub>10</sub> -H <sub>3</sub> PO <sub>4</sub> <sup>+2</sup> | 740.4413               | y <sub>7</sub> -H <sub>3</sub> PO <sub>4</sub>                | 1067.5844 | y <sub>10</sub> -H <sub>3</sub> PO <sub>4</sub> | 1483.721  | MH-H <sub>3</sub> PO <sub>4</sub>               |
| 303.2139               | y <sub>2</sub>                                               | 546.1864               | b <sub>5</sub>                                                | 742.3641 <sup>+2</sup> | MH-H <sub>3</sub> PO <sub>4</sub> <sup>+2</sup>               | 1094.4823 | b <sub>11</sub> -H <sub>3</sub> PO <sub>4</sub> | 1484.6451 | y <sub>13</sub>                                 |
| 327.6522 <sup>+2</sup> | y <sub>5</sub> <sup>+2</sup>                                 | 556.3202               | y <sub>5</sub> -H <sub>3</sub> PO <sub>4</sub>                | 742.8262 <sup>+2</sup> | y <sub>13</sub> <sup>+2</sup>                                 | 1095.4064 | b <sub>10</sub>                                 | 1581.6978 | MH                                              |
| 335.2058 <sup>+2</sup> | y <sub>6</sub> -H <sub>3</sub> PO <sub>4</sub> <sup>+2</sup> | 583.2843 <sup>+2</sup> | y <sub>10</sub> <sup>+2</sup>                                 | 744.2869               | b <sub>7</sub>                                                | 1165.5613 | y <sub>10</sub>                                 |           |                                                 |
| 370.7243 <sup>+2</sup> | y <sub>7</sub> -H <sub>3</sub> PO <sub>4</sub> <sup>+2</sup> | 598.8171 <sup>+2</sup> | y <sub>11</sub> -H <sub>3</sub> PO <sub>4</sub> <sup>+2</sup> | 767.3811               | y <sub>6</sub>                                                | 1181.5143 | b <sub>12</sub> -H <sub>3</sub> PO <sub>4</sub> |           |                                                 |
| 384.1942 <sup>+2</sup> | y <sub>6</sub> <sup>+2</sup>                                 | 642.3331 <sup>+2</sup> | y <sub>12</sub> -H <sub>3</sub> PO <sub>4</sub> <sup>+2</sup> | 791.3526 <sup>+2</sup> | MH <sup>+2</sup>                                              | 1192.4592 | b <sub>11</sub>                                 |           |                                                 |
| 390.2459               | y <sub>3</sub>                                               | 647.2341               | b <sub>6</sub>                                                | 815.324                | b <sub>8</sub>                                                | 1196.627  | y <sub>11</sub> -H <sub>3</sub> PO <sub>4</sub> |           |                                                 |

MS/MS Fragmentation of SsPPLPPPAEER  
 Found in IPI00045360, Protein capicua homolog

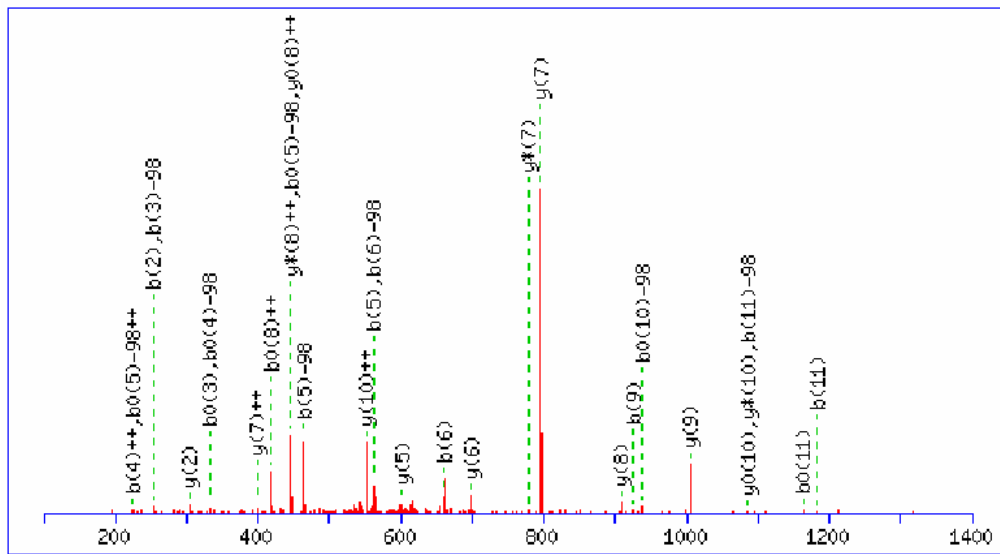

|                        |                                                |                        |                                                |                        |                                                               |           |                                                 |           |                                                 |
|------------------------|------------------------------------------------|------------------------|------------------------------------------------|------------------------|---------------------------------------------------------------|-----------|-------------------------------------------------|-----------|-------------------------------------------------|
| 88.0631 <sup>+2</sup>  | y <sub>1</sub> <sup>+2</sup>                   | 349.6770 <sup>+2</sup> | y <sub>6</sub> <sup>+2</sup>                   | 551.7982 <sup>+2</sup> | y <sub>10</sub> <sup>+2</sup>                                 | 698.3468  | y <sub>6</sub>                                  | 1053.4653 | b <sub>10</sub>                                 |
| 152.5844 <sup>+2</sup> | y <sub>2</sub> <sup>+2</sup>                   | 351.1663               | b <sub>4</sub> -H <sub>3</sub> PO <sub>4</sub> | 561.3031               | b <sub>6</sub> -H <sub>3</sub> PO <sub>4</sub>                | 755.4087  | b <sub>8</sub> -H <sub>3</sub> PO <sub>4</sub>  | 1084.531  | b <sub>11</sub> -H <sub>3</sub> PO <sub>4</sub> |
| 157.0608               | b <sub>2</sub> -H <sub>3</sub> PO <sub>4</sub> | 352.0904               | b <sub>3</sub>                                 | 562.2273               | b <sub>5</sub>                                                | 756.3328  | b <sub>7</sub>                                  | 1102.5891 | y <sub>10</sub>                                 |
| 175.119                | y <sub>1</sub>                                 | 398.2034 <sup>+2</sup> | y <sub>7</sub> <sup>+2</sup>                   | 586.3089 <sup>+2</sup> | y <sub>11</sub> -H <sub>3</sub> PO <sub>4</sub> <sup>+2</sup> | 795.3995  | y <sub>7</sub>                                  | 1171.6106 | y <sub>11</sub> -H <sub>3</sub> PO <sub>4</sub> |
| 217.1057 <sup>+2</sup> | y <sub>3</sub> <sup>+2</sup>                   | 433.2041               | y <sub>3</sub>                                 | 601.294                | y <sub>5</sub>                                                | 826.4458  | b <sub>9</sub> -H <sub>3</sub> PO <sub>4</sub>  | 1182.5078 | b <sub>11</sub>                                 |
| 252.6243 <sup>+2</sup> | y <sub>4</sub> <sup>+2</sup>                   | 449.1432               | b <sub>4</sub>                                 | 629.8250 <sup>+2</sup> | MH-H <sub>3</sub> PO <sub>4</sub> <sup>+2</sup>               | 853.3855  | b <sub>8</sub>                                  | 1258.6426 | MH-H <sub>3</sub> PO <sub>4</sub>               |
| 254.1135               | b <sub>3</sub> -H <sub>3</sub> PO <sub>4</sub> | 454.7454 <sup>+2</sup> | y <sub>8</sub> <sup>+2</sup>                   | 635.2974 <sup>+2</sup> | y <sub>11</sub> <sup>+2</sup>                                 | 908.4836  | y <sub>8</sub>                                  | 1269.5875 | y <sub>11</sub>                                 |
| 255.0377               | b <sub>2</sub>                                 | 464.2504               | b <sub>5</sub> -H <sub>3</sub> PO <sub>4</sub> | 658.3559               | b <sub>7</sub> -H <sub>3</sub> PO <sub>4</sub>                | 924.4227  | b <sub>9</sub>                                  | 1356.6195 | MH                                              |
| 301.1506 <sup>+2</sup> | y <sub>5</sub> <sup>+2</sup>                   | 503.2718 <sup>+2</sup> | y <sub>9</sub> <sup>+2</sup>                   | 659.28                 | b <sub>6</sub>                                                | 955.4884  | b <sub>10</sub> -H <sub>3</sub> PO <sub>4</sub> |           |                                                 |
| 304.1615               | y <sub>2</sub>                                 | 504.2413               | y <sub>4</sub>                                 | 678.8134 <sup>+2</sup> | MH <sup>+2</sup>                                              | 1005.5364 | y <sub>9</sub>                                  |           |                                                 |

MS/MS Fragmentation of AQ(S)V(S)PVQAPPPGSAQLLPGK  
 Found in IPI00045360, Protein capicua homolog

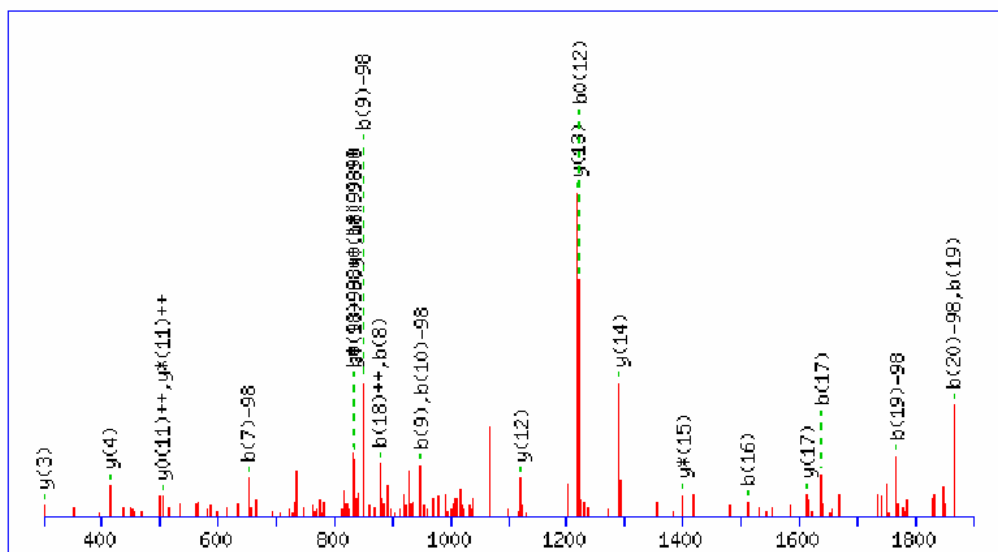

|                        |                                                |                        |                                                               |                         |                                                               |           |                                                 |           |                                                 |
|------------------------|------------------------------------------------|------------------------|---------------------------------------------------------------|-------------------------|---------------------------------------------------------------|-----------|-------------------------------------------------|-----------|-------------------------------------------------|
| 74.0600 <sup>+2</sup>  | y <sub>1</sub> <sup>+2</sup>                   | 527.3552               | y <sub>5</sub>                                                | 877.3815                | b <sub>8</sub>                                                | 1198.6215 | b <sub>13</sub> -H <sub>3</sub> PO <sub>4</sub> | 1767.9388 | b <sub>19</sub> -H <sub>3</sub> PO <sub>4</sub> |
| 102.5708 <sup>+2</sup> | y <sub>2</sub> <sup>+2</sup>                   | 552.2776               | b <sub>6</sub> -H <sub>3</sub> PO <sub>4</sub>                | 890.9533 <sup>+2</sup>  | y <sub>18</sub> <sup>+2</sup>                                 | 1218.6841 | y <sub>13</sub>                                 | 1780.8993 | y <sub>18</sub>                                 |
| 147.1128               | y <sub>1</sub>                                 | 553.2018               | b <sub>5</sub>                                                | 891.4991 <sup>+2</sup>  | y <sub>19</sub> -H <sub>3</sub> PO <sub>4</sub> <sup>+2</sup> | 1239.5769 | b <sub>12</sub>                                 | 1781.9908 | y <sub>19</sub> -H <sub>3</sub> PO <sub>4</sub> |
| 151.0972 <sup>+2</sup> | y <sub>3</sub> <sup>+2</sup>                   | 561.3193 <sup>+2</sup> | y <sub>12</sub> <sup>+2</sup>                                 | 927.5258                | y <sub>10</sub>                                               | 1255.643  | b <sub>14</sub> -H <sub>3</sub> PO <sub>4</sub> | 1864.9916 | b <sub>20</sub> -H <sub>3</sub> PO <sub>4</sub> |
| 200.103                | b <sub>2</sub>                                 | 609.8457 <sup>+2</sup> | y <sub>13</sub> <sup>+2</sup>                                 | 935.0151 <sup>+2</sup>  | y <sub>20</sub> -H <sub>3</sub> PO <sub>4</sub> <sup>+2</sup> | 1289.7212 | y <sub>14</sub>                                 | 1865.9157 | b <sub>19</sub>                                 |
| 204.1343               | y <sub>2</sub>                                 | 645.3642 <sup>+2</sup> | y <sub>14</sub> <sup>+2</sup>                                 | 940.4875 <sup>+2</sup>  | y <sub>19</sub> <sup>+2</sup>                                 | 1296.5984 | b <sub>13</sub>                                 | 1869.0229 | y <sub>20</sub> -H <sub>3</sub> PO <sub>4</sub> |
| 207.6392 <sup>+2</sup> | y <sub>4</sub> <sup>+2</sup>                   | 650.2545               | b <sub>6</sub>                                                | 947.4945                | b <sub>10</sub> -H <sub>3</sub> PO <sub>4</sub>               | 1342.675  | b <sub>15</sub> -H <sub>3</sub> PO <sub>4</sub> | 1879.9677 | y <sub>19</sub>                                 |
| 264.1812 <sup>+2</sup> | y <sub>5</sub> <sup>+2</sup>                   | 651.3461               | b <sub>7</sub> -H <sub>3</sub> PO <sub>4</sub>                | 948.4186                | b <sub>9</sub>                                                | 1353.6199 | b <sub>14</sub>                                 | 1922.013  | b <sub>21</sub> -H <sub>3</sub> PO <sub>4</sub> |
| 287.135                | b <sub>3</sub>                                 | 655.4137               | y <sub>6</sub>                                                | 984.0035 <sup>+2</sup>  | y <sub>20</sub> <sup>+2</sup>                                 | 1413.7121 | b <sub>16</sub> -H <sub>3</sub> PO <sub>4</sub> | 1962.9685 | b <sub>20</sub>                                 |
| 301.187                | y <sub>3</sub>                                 | 709.3935 <sup>+2</sup> | y <sub>15</sub> <sup>+2</sup>                                 | 999.0444 <sup>+2</sup>  | y <sub>21</sub> -H <sub>3</sub> PO <sub>4</sub> <sup>+2</sup> | 1417.7798 | y <sub>15</sub>                                 | 1966.9998 | y <sub>20</sub>                                 |
| 328.2105 <sup>+2</sup> | y <sub>6</sub> <sup>+2</sup>                   | 726.4509               | y <sub>7</sub>                                                | 1024.5786               | y <sub>11</sub>                                               | 1440.6519 | b <sub>15</sub>                                 | 1997.0815 | y <sub>21</sub> -H <sub>3</sub> PO <sub>4</sub> |
| 363.7291 <sup>+2</sup> | y <sub>7</sub> <sup>+2</sup>                   | 749.3229               | b <sub>7</sub>                                                | 1034.5629 <sup>+2</sup> | MH-H <sub>3</sub> PO <sub>4</sub> <sup>+2</sup>               | 1511.689  | b <sub>16</sub>                                 | 2019.9899 | b <sub>21</sub>                                 |
| 386.2034               | b <sub>4</sub>                                 | 758.9277 <sup>+2</sup> | y <sub>16</sub> <sup>+2</sup>                                 | 1044.5473               | b <sub>11</sub> -H <sub>3</sub> PO <sub>4</sub>               | 1516.8482 | y <sub>16</sub>                                 | 2068.1186 | MH-H <sub>3</sub> PO <sub>4</sub>               |
| 407.2451 <sup>+2</sup> | y <sub>8</sub> <sup>+2</sup>                   | 779.4046               | b <sub>8</sub> -H <sub>3</sub> PO <sub>4</sub>                | 1045.4714               | b <sub>10</sub>                                               | 1541.7707 | b <sub>17</sub> -H <sub>3</sub> PO <sub>4</sub> | 2095.0583 | y <sub>21</sub>                                 |
| 414.2711               | y <sub>4</sub>                                 | 807.4541 <sup>+2</sup> | y <sub>17</sub> <sup>+2</sup>                                 | 1048.0328 <sup>+2</sup> | y <sub>21</sub> <sup>+2</sup>                                 | 1613.901  | y <sub>17</sub>                                 | 2166.0955 | MH                                              |
| 435.7558 <sup>+2</sup> | y <sub>9</sub> <sup>+2</sup>                   | 813.4829               | y <sub>8</sub>                                                | 1083.5514 <sup>+2</sup> | MH <sup>+2</sup>                                              | 1639.7476 | b <sub>17</sub>                                 |           |                                                 |
| 455.2249               | b <sub>5</sub> -H <sub>3</sub> PO <sub>4</sub> | 841.9649 <sup>+2</sup> | y <sub>18</sub> -H <sub>3</sub> PO <sub>4</sub> <sup>+2</sup> | 1121.6313               | y <sub>12</sub>                                               | 1654.8547 | b <sub>18</sub> -H <sub>3</sub> PO <sub>4</sub> |           |                                                 |
| 464.2665 <sup>+2</sup> | y <sub>10</sub> <sup>+2</sup>                  | 850.4417               | b <sub>9</sub> -H <sub>3</sub> PO <sub>4</sub>                | 1141.6                  | b <sub>12</sub> -H <sub>3</sub> PO <sub>4</sub>               | 1682.9224 | y <sub>18</sub> -H <sub>3</sub> PO <sub>4</sub> |           |                                                 |
| 512.7929 <sup>+2</sup> | y <sub>11</sub> <sup>+2</sup>                  | 870.5043               | y <sub>9</sub>                                                | 1142.5242               | b <sub>11</sub>                                               | 1752.8316 | b <sub>18</sub>                                 |           |                                                 |



MS/MS Fragmentation of ASsFSGISVLTR  
 Found in IPI00014214, R3H domain protein 1

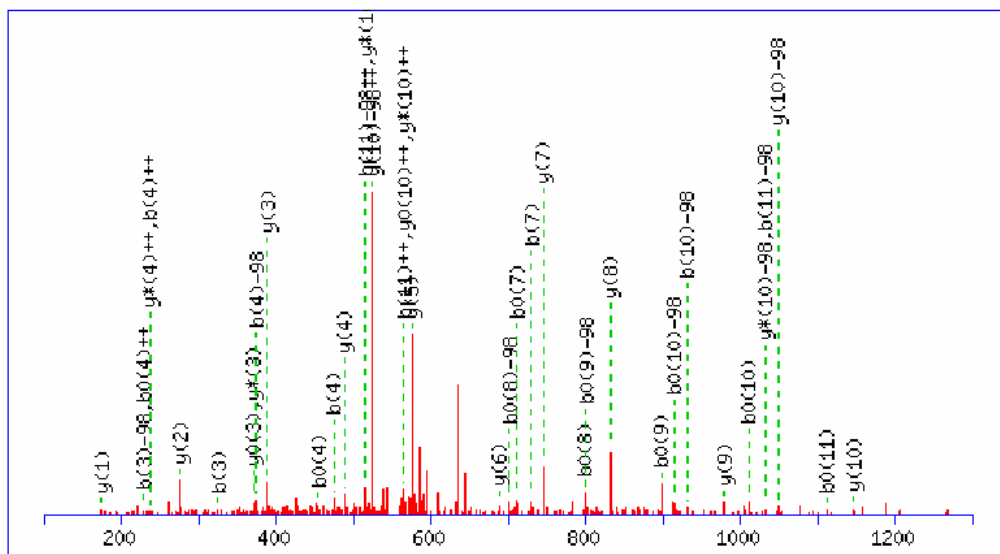

|                        |                                                |                        |                                                |                        |                                                               |          |                                                 |           |                                                 |
|------------------------|------------------------------------------------|------------------------|------------------------------------------------|------------------------|---------------------------------------------------------------|----------|-------------------------------------------------|-----------|-------------------------------------------------|
| 88.0631 <sup>+2</sup>  | y <sub>1</sub> <sup>+2</sup>                   | 344.7212 <sup>+2</sup> | y <sub>6</sub> <sup>+2</sup>                   | 524.7929 <sup>+2</sup> | y <sub>10</sub> -H <sub>3</sub> PO <sub>4</sub> <sup>+2</sup> | 688.4352 | y <sub>6</sub>                                  | 1029.4653 | b <sub>10</sub>                                 |
| 138.5870 <sup>+2</sup> | y <sub>2</sub> <sup>+2</sup>                   | 373.2320 <sup>+2</sup> | y <sub>7</sub> <sup>+2</sup>                   | 560.1752               | b <sub>5</sub>                                                | 719.3359 | b <sub>8</sub> -H <sub>3</sub> PO <sub>4</sub>  | 1032.536  | b <sub>11</sub> -H <sub>3</sub> PO <sub>4</sub> |
| 159.0764               | b <sub>2</sub>                                 | 375.1663               | b <sub>4</sub> -H <sub>3</sub> PO <sub>4</sub> | 568.3089 <sup>+2</sup> | y <sub>11</sub> -H <sub>3</sub> PO <sub>4</sub> <sup>+2</sup> | 730.2807 | b <sub>7</sub>                                  | 1048.5786 | y <sub>10</sub> -H <sub>3</sub> PO <sub>4</sub> |
| 175.119                | y <sub>1</sub>                                 | 389.2507               | y <sub>3</sub>                                 | 573.7814 <sup>+2</sup> | y <sub>10</sub> <sup>+2</sup>                                 | 745.4567 | y <sub>7</sub>                                  | 1130.5129 | b <sub>11</sub>                                 |
| 195.1290 <sup>+2</sup> | y <sub>3</sub> <sup>+2</sup>                   | 416.7480 <sup>+2</sup> | y <sub>8</sub> <sup>+2</sup>                   | 575.3511               | y <sub>5</sub>                                                | 817.3128 | b <sub>8</sub>                                  | 1135.6106 | y <sub>11</sub> -H <sub>3</sub> PO <sub>4</sub> |
| 228.0979               | b <sub>3</sub> -H <sub>3</sub> PO <sub>4</sub> | 462.1983               | b <sub>5</sub> -H <sub>3</sub> PO <sub>4</sub> | 603.8275 <sup>+2</sup> | MH-H <sub>3</sub> PO <sub>4</sub> <sup>+2</sup>               | 818.4043 | b <sub>9</sub> -H <sub>3</sub> PO <sub>4</sub>  | 1146.5555 | y <sub>10</sub>                                 |
| 244.6632 <sup>+2</sup> | y <sub>4</sub> <sup>+2</sup>                   | 473.1432               | b <sub>4</sub>                                 | 617.1967               | b <sub>6</sub>                                                | 832.4887 | y <sub>8</sub>                                  | 1206.6477 | MH-H <sub>3</sub> PO <sub>4</sub>               |
| 276.1666               | y <sub>2</sub>                                 | 488.3191               | y <sub>4</sub>                                 | 617.2974 <sup>+2</sup> | y <sub>11</sub> <sup>+2</sup>                                 | 916.3812 | b <sub>9</sub>                                  | 1233.5875 | y <sub>11</sub>                                 |
| 288.1792 <sup>+2</sup> | y <sub>5</sub> <sup>+2</sup>                   | 490.2822 <sup>+2</sup> | y <sub>9</sub> <sup>+2</sup>                   | 632.3039               | b <sub>7</sub> -H <sub>3</sub> PO <sub>4</sub>                | 931.4884 | b <sub>10</sub> -H <sub>3</sub> PO <sub>4</sub> | 1304.6246 | MH                                              |
| 326.0748               | b <sub>3</sub>                                 | 519.2198               | b <sub>6</sub> -H <sub>3</sub> PO <sub>4</sub> | 652.8159 <sup>+2</sup> | MH <sup>+2</sup>                                              | 979.5571 | y <sub>9</sub>                                  |           |                                                 |

MS/MS Fragmentation of NALPPVLTTVNGQsPPEHSAPAK  
 Found in IPI00185919, Isoform 1 of La-related protein 1

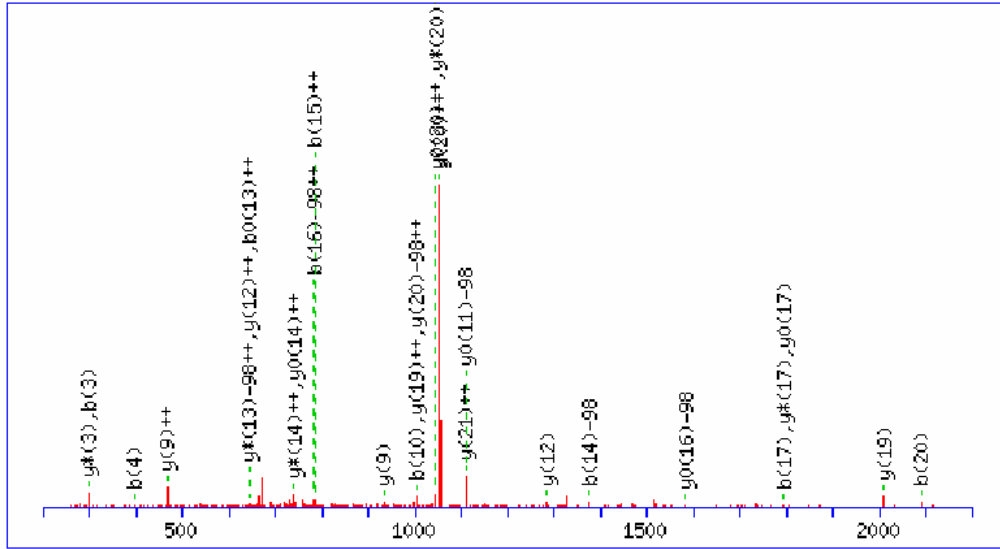

|                        |                                                               |                        |                                                               |                         |                                                               |                         |                                                 |           |                                                 |
|------------------------|---------------------------------------------------------------|------------------------|---------------------------------------------------------------|-------------------------|---------------------------------------------------------------|-------------------------|-------------------------------------------------|-----------|-------------------------------------------------|
| 74.0600 <sup>+2</sup>  | y <sub>1</sub> <sup>+2</sup>                                  | 610.3307               | y <sub>6</sub>                                                | 961.4920 <sup>+2</sup>  | b <sub>19</sub> -H <sub>3</sub> PO <sub>4</sub> <sup>+2</sup> | 1187.5804               | y <sub>12</sub> -H <sub>3</sub> PO <sub>4</sub> | 1814.9395 | y <sub>18</sub> -H <sub>3</sub> PO <sub>4</sub> |
| 109.5786 <sup>+2</sup> | y <sub>2</sub> <sup>+2</sup>                                  | 614.7715 <sup>+2</sup> | y <sub>11</sub> <sup>+2</sup>                                 | 966.9644 <sup>+2</sup>  | b <sub>18</sub> <sup>+2</sup>                                 | 1203.0967 <sup>+2</sup> | MH <sup>+2</sup>                                | 1834.9446 | b <sub>18</sub> -H <sub>3</sub> PO <sub>4</sub> |
| 147.1128               | y <sub>1</sub>                                                | 643.2823 <sup>+2</sup> | y <sub>12</sub> <sup>+2</sup>                                 | 997.0105 <sup>+2</sup>  | b <sub>20</sub> -H <sub>3</sub> PO <sub>4</sub> <sup>+2</sup> | 1228.5358               | y <sub>11</sub>                                 | 1911.9923 | y <sub>19</sub> -H <sub>3</sub> PO <sub>4</sub> |
| 158.1050 <sup>+2</sup> | y <sub>3</sub> <sup>+2</sup>                                  | 651.3153 <sup>+2</sup> | y <sub>13</sub> -H <sub>3</sub> PO <sub>4</sub> <sup>+2</sup> | 1002.5003               | y <sub>10</sub> -H <sub>3</sub> PO <sub>4</sub>               | 1285.5573               | y <sub>12</sub>                                 | 1912.9164 | y <sub>18</sub>                                 |
| 186.0873               | b <sub>2</sub>                                                | 700.3037 <sup>+2</sup> | y <sub>13</sub> <sup>+2</sup>                                 | 1005.0262 <sup>+2</sup> | y <sub>20</sub> -H <sub>3</sub> PO <sub>4</sub> <sup>+2</sup> | 1301.6233               | y <sub>13</sub> -H <sub>3</sub> PO <sub>4</sub> | 1921.9767 | b <sub>19</sub> -H <sub>3</sub> PO <sub>4</sub> |
| 193.6235 <sup>+2</sup> | y <sub>4</sub> <sup>+2</sup>                                  | 700.8495 <sup>+2</sup> | y <sub>14</sub> -H <sub>3</sub> PO <sub>4</sub> <sup>+2</sup> | 1005.4882 <sup>+2</sup> | y <sub>19</sub> <sup>+2</sup>                                 | 1305.7161               | b <sub>13</sub>                                 | 1932.9215 | b <sub>18</sub>                                 |
| 218.1499               | y <sub>2</sub>                                                | 705.4294               | b <sub>7</sub>                                                | 1006.5932               | b <sub>10</sub>                                               | 1374.7376               | b <sub>14</sub> -H <sub>3</sub> PO <sub>4</sub> | 1993.0138 | b <sub>20</sub> -H <sub>3</sub> PO <sub>4</sub> |
| 237.1396 <sup>+2</sup> | y <sub>5</sub> <sup>+2</sup>                                  | 739.3733               | y <sub>7</sub>                                                | 1010.4804 <sup>+2</sup> | b <sub>19</sub> <sup>+2</sup>                                 | 1399.6002               | y <sub>13</sub>                                 | 2009.0451 | y <sub>20</sub> -H <sub>3</sub> PO <sub>4</sub> |
| 299.1714               | b <sub>3</sub>                                                | 749.8379 <sup>+2</sup> | y <sub>14</sub> <sup>+2</sup>                                 | 1045.5369 <sup>+2</sup> | b <sub>21</sub> -H <sub>3</sub> PO <sub>4</sub> <sup>+2</sup> | 1400.6917               | y <sub>14</sub> -H <sub>3</sub> PO <sub>4</sub> | 2009.9692 | y <sub>19</sub>                                 |
| 305.6690 <sup>+2</sup> | y <sub>6</sub> <sup>+2</sup>                                  | 751.3733 <sup>+2</sup> | y <sub>15</sub> -H <sub>3</sub> PO <sub>4</sub> <sup>+2</sup> | 1045.9990 <sup>+2</sup> | b <sub>20</sub> <sup>+2</sup>                                 | 1471.7904               | b <sub>15</sub> -H <sub>3</sub> PO <sub>4</sub> | 2019.9535 | b <sub>19</sub>                                 |
| 315.2027               | y <sub>3</sub>                                                | 800.3618 <sup>+2</sup> | y <sub>15</sub> <sup>+2</sup>                                 | 1054.0146 <sup>+2</sup> | y <sub>20</sub> <sup>+2</sup>                                 | 1472.7145               | b <sub>14</sub>                                 | 2090.0665 | b <sub>21</sub> -H <sub>3</sub> PO <sub>4</sub> |
| 370.1903 <sup>+2</sup> | y <sub>7</sub> <sup>+2</sup>                                  | 801.8972 <sup>+2</sup> | y <sub>16</sub> -H <sub>3</sub> PO <sub>4</sub> <sup>+2</sup> | 1061.5682 <sup>+2</sup> | y <sub>21</sub> -H <sub>3</sub> PO <sub>4</sub> <sup>+2</sup> | 1498.6686               | y <sub>14</sub>                                 | 2090.9907 | b <sub>20</sub>                                 |
| 386.2398               | y <sub>4</sub>                                                | 806.4771               | b <sub>8</sub>                                                | 1081.0555 <sup>+2</sup> | b <sub>22</sub> -H <sub>3</sub> PO <sub>4</sub> <sup>+2</sup> | 1501.7394               | y <sub>15</sub> -H <sub>3</sub> PO <sub>4</sub> | 2107.022  | y <sub>20</sub>                                 |
| 396.2241               | b <sub>4</sub>                                                | 836.4261               | y <sub>8</sub>                                                | 1094.5254 <sup>+2</sup> | b <sub>21</sub> <sup>+2</sup>                                 | 1568.8431               | b <sub>16</sub> -H <sub>3</sub> PO <sub>4</sub> | 2122.1291 | y <sub>21</sub> -H <sub>3</sub> PO <sub>4</sub> |
| 418.7167 <sup>+2</sup> | y <sub>8</sub> <sup>+2</sup>                                  | 850.8856 <sup>+2</sup> | y <sub>16</sub> <sup>+2</sup>                                 | 1097.0868 <sup>+2</sup> | y <sub>22</sub> -H <sub>3</sub> PO <sub>4</sub> <sup>+2</sup> | 1569.7672               | b <sub>15</sub>                                 | 2161.1036 | b <sub>22</sub> -H <sub>3</sub> PO <sub>4</sub> |
| 467.2431 <sup>+2</sup> | y <sub>9</sub> <sup>+2</sup>                                  | 858.4392 <sup>+2</sup> | y <sub>17</sub> -H <sub>3</sub> PO <sub>4</sub> <sup>+2</sup> | 1100.4772               | y <sub>10</sub>                                               | 1599.7163               | y <sub>15</sub>                                 | 2188.0434 | b <sub>21</sub>                                 |
| 473.2718               | y <sub>5</sub>                                                | 907.4276 <sup>+2</sup> | y <sub>17</sub> <sup>+2</sup>                                 | 1110.5567 <sup>+2</sup> | y <sub>21</sub> <sup>+2</sup>                                 | 1602.7871               | y <sub>16</sub> -H <sub>3</sub> PO <sub>4</sub> | 2193.1662 | y <sub>22</sub> -H <sub>3</sub> PO <sub>4</sub> |
| 493.2769               | b <sub>5</sub>                                                | 907.5247               | b <sub>9</sub>                                                | 1120.6361               | b <sub>11</sub>                                               | 1666.82                 | b <sub>16</sub>                                 | 2220.106  | y <sub>21</sub>                                 |
| 501.7538 <sup>+2</sup> | y <sub>10</sub> -H <sub>3</sub> PO <sub>4</sub> <sup>+2</sup> | 907.9734 <sup>+2</sup> | y <sub>18</sub> -H <sub>3</sub> PO <sub>4</sub> <sup>+2</sup> | 1130.0439 <sup>+2</sup> | b <sub>22</sub> <sup>+2</sup>                                 | 1697.8857               | b <sub>17</sub> -H <sub>3</sub> PO <sub>4</sub> | 2259.0805 | b <sub>22</sub>                                 |
| 550.7422 <sup>+2</sup> | y <sub>10</sub> <sup>+2</sup>                                 | 917.9759 <sup>+2</sup> | b <sub>18</sub> -H <sub>3</sub> PO <sub>4</sub> <sup>+2</sup> | 1130.5589               | y <sub>11</sub> -H <sub>3</sub> PO <sub>4</sub>               | 1700.764                | y <sub>16</sub>                                 | 2291.1431 | y <sub>22</sub>                                 |
| 565.7831 <sup>+2</sup> | y <sub>11</sub> -H <sub>3</sub> PO <sub>4</sub> <sup>+2</sup> | 933.4789               | y <sub>9</sub>                                                | 1146.0752 <sup>+2</sup> | y <sub>22</sub> <sup>+2</sup>                                 | 1715.8711               | y <sub>17</sub> -H <sub>3</sub> PO <sub>4</sub> | 2307.2092 | MH-H <sub>3</sub> PO <sub>4</sub>               |
| 592.3453               | b <sub>6</sub>                                                | 956.4998 <sup>+2</sup> | y <sub>19</sub> -H <sub>3</sub> PO <sub>4</sub> <sup>+2</sup> | 1154.1082 <sup>+2</sup> | MH-H <sub>3</sub> PO <sub>4</sub> <sup>+2</sup>               | 1795.8626               | b <sub>17</sub>                                 | 2405.1861 | MH                                              |
| 594.2938 <sup>+2</sup> | y <sub>12</sub> -H <sub>3</sub> PO <sub>4</sub> <sup>+2</sup> | 956.9619 <sup>+2</sup> | y <sub>18</sub> <sup>+2</sup>                                 | 1177.6575               | b <sub>12</sub>                                               | 1813.848                | y <sub>17</sub>                                 |           |                                                 |

MS/MS Fragmentation of HSsNPPLESHVGWVmDSR  
 Found in IPI00185919, Isoform 1 of La-related protein 1

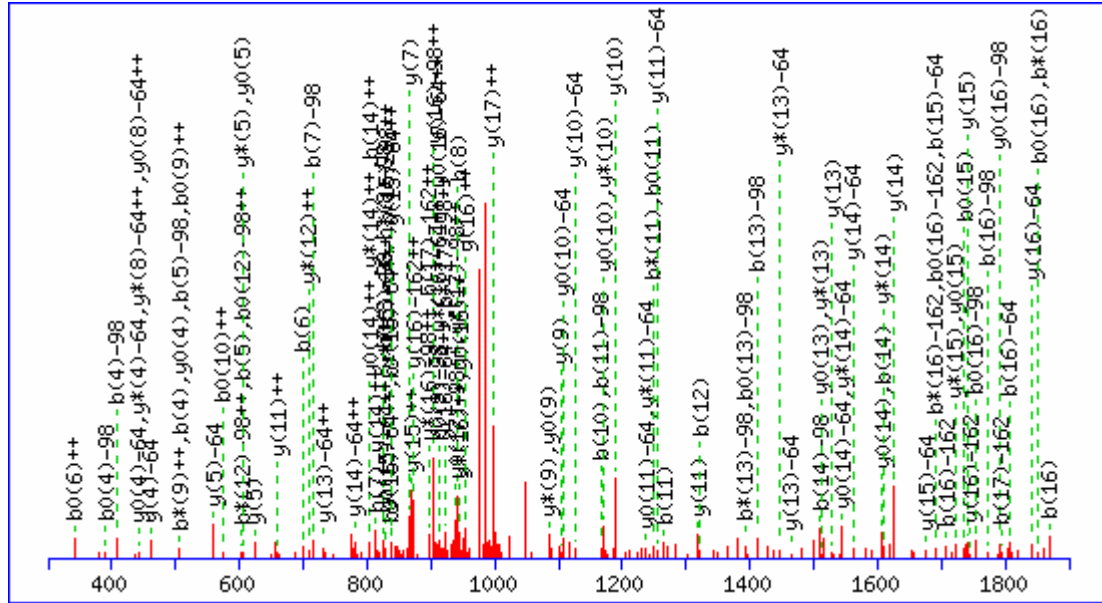

|                        |                                                              |                        |                                                               |                        |                                                               |                         |                                                               |           |                                                 |
|------------------------|--------------------------------------------------------------|------------------------|---------------------------------------------------------------|------------------------|---------------------------------------------------------------|-------------------------|---------------------------------------------------------------|-----------|-------------------------------------------------|
| 88.0631 <sup>+2</sup>  | y <sub>1</sub> <sup>+2</sup>                                 | 405.1842 <sup>+2</sup> | y <sub>6</sub> <sup>+2</sup>                                  | 633.2692 <sup>+2</sup> | b <sub>11</sub> <sup>+2</sup>                                 | 929.9125 <sup>+2</sup>  | b <sub>17</sub> -H <sub>3</sub> PO <sub>4</sub> <sup>+2</sup> | 1410.6549 | b <sub>13</sub> -H <sub>3</sub> PO <sub>4</sub> |
| 113.0527 <sup>+2</sup> | b <sub>2</sub> <sup>+2</sup>                                 | 407.1682 <sup>+2</sup> | b <sub>7</sub> <sup>+2</sup>                                  | 659.7959 <sup>+2</sup> | y <sub>11</sub> <sup>+2</sup>                                 | 931.4268                | b <sub>9</sub> -H <sub>3</sub> PO <sub>4</sub>                | 1431.6685 | y <sub>12</sub>                                 |
| 131.5791 <sup>+2</sup> | y <sub>2</sub> <sup>+2</sup>                                 | 408.1626               | b <sub>4</sub> -H <sub>3</sub> PO <sub>4</sub>                | 661.7799 <sup>+2</sup> | b <sub>12</sub> <sup>+2</sup>                                 | 935.3849 <sup>+2</sup>  | b <sub>16</sub> <sup>+2</sup>                                 | 1508.6318 | b <sub>13</sub>                                 |
| 147.5635 <sup>+2</sup> | b <sub>3</sub> -H <sub>3</sub> PO <sub>4</sub> <sup>+2</sup> | 422.7010 <sup>+2</sup> | b <sub>8</sub> -H <sub>3</sub> PO <sub>4</sub> <sup>+2</sup>  | 700.245                | b <sub>6</sub>                                                | 942.3717                | b <sub>8</sub>                                                | 1509.7233 | b <sub>14</sub> -H <sub>3</sub> PO <sub>4</sub> |
| 175.119                | y <sub>1</sub>                                               | 433.6949 <sup>+2</sup> | y <sub>7</sub> <sup>+2</sup>                                  | 705.8311 <sup>+2</sup> | b <sub>13</sub> -H <sub>3</sub> PO <sub>4</sub> <sup>+2</sup> | 948.4389 <sup>+2</sup>  | y <sub>17</sub> -H <sub>3</sub> PO <sub>4</sub> <sup>+2</sup> | 1528.7213 | y <sub>13</sub>                                 |
| 189.0926 <sup>+2</sup> | y <sub>3</sub> <sup>+2</sup>                                 | 466.2170 <sup>+2</sup> | b <sub>9</sub> -H <sub>3</sub> PO <sub>4</sub> <sup>+2</sup>  | 715.3522               | b <sub>7</sub> -H <sub>3</sub> PO <sub>4</sub>                | 953.9113 <sup>+2</sup>  | y <sub>16</sub> <sup>+2</sup>                                 | 1607.7002 | b <sub>14</sub>                                 |
| 196.5519 <sup>+2</sup> | b <sub>3</sub> <sup>+2</sup>                                 | 471.6895 <sup>+2</sup> | b <sub>8</sub> <sup>+2</sup>                                  | 716.3379 <sup>+2</sup> | y <sub>12</sub> <sup>+2</sup>                                 | 965.4509                | y <sub>8</sub>                                                | 1625.7741 | y <sub>14</sub>                                 |
| 204.5849 <sup>+2</sup> | b <sub>4</sub> -H <sub>3</sub> PO <sub>4</sub> <sup>+2</sup> | 483.2291 <sup>+2</sup> | y <sub>8</sub> <sup>+2</sup>                                  | 754.8195 <sup>+2</sup> | b <sub>13</sub> <sup>+2</sup>                                 | 978.9009 <sup>+2</sup>  | b <sub>17</sub> <sup>+2</sup>                                 | 1656.7587 | b <sub>15</sub> -H <sub>3</sub> PO <sub>4</sub> |
| 225.0982               | b <sub>2</sub>                                               | 505.2154               | b <sub>5</sub> -H <sub>3</sub> PO <sub>4</sub>                | 755.3653 <sup>+2</sup> | b <sub>14</sub> -H <sub>3</sub> PO <sub>4</sub> <sup>+2</sup> | 997.4273 <sup>+2</sup>  | y <sub>17</sub> <sup>+2</sup>                                 | 1739.817  | y <sub>15</sub>                                 |
| 253.1113 <sup>+2</sup> | b <sub>5</sub> -H <sub>3</sub> PO <sub>4</sub> <sup>+2</sup> | 506.1395               | b <sub>4</sub>                                                | 764.8643 <sup>+2</sup> | y <sub>13</sub> <sup>+2</sup>                                 | 1016.9683 <sup>+2</sup> | MH-H <sub>3</sub> PO <sub>4</sub> <sup>+2</sup>               | 1754.7356 | b <sub>15</sub>                                 |
| 253.5734 <sup>+2</sup> | b <sub>4</sub> <sup>+2</sup>                                 | 515.2055 <sup>+2</sup> | b <sub>9</sub> <sup>+2</sup>                                  | 804.3538 <sup>+2</sup> | b <sub>14</sub> <sup>+2</sup>                                 | 1029.4037               | b <sub>9</sub>                                                | 1771.7857 | b <sub>16</sub> -H <sub>3</sub> PO <sub>4</sub> |
| 262.151                | y <sub>2</sub>                                               | 524.2133               | y <sub>4</sub>                                                | 809.361                | y <sub>6</sub>                                                | 1065.9568 <sup>+2</sup> | MH <sup>+2</sup>                                              | 1808.8384 | y <sub>16</sub> -H <sub>3</sub> PO <sub>4</sub> |
| 262.6103 <sup>+2</sup> | y <sub>4</sub> <sup>+2</sup>                                 | 534.7465 <sup>+2</sup> | b <sub>10</sub> -H <sub>3</sub> PO <sub>4</sub> <sup>+2</sup> | 813.3291               | b <sub>7</sub>                                                | 1068.4857               | b <sub>10</sub> -H <sub>3</sub> PO <sub>4</sub>               | 1858.8177 | b <sub>17</sub> -H <sub>3</sub> PO <sub>4</sub> |
| 294.1197               | b <sub>3</sub> -H <sub>3</sub> PO <sub>4</sub>               | 551.7586 <sup>+2</sup> | y <sub>9</sub> <sup>+2</sup>                                  | 813.3907 <sup>+2</sup> | y <sub>14</sub> <sup>+2</sup>                                 | 1102.5098               | y <sub>9</sub>                                                | 1869.7626 | b <sub>16</sub>                                 |
| 301.6377 <sup>+2</sup> | b <sub>6</sub> -H <sub>3</sub> PO <sub>4</sub> <sup>+2</sup> | 583.7350 <sup>+2</sup> | b <sub>10</sub> <sup>+2</sup>                                 | 828.8830 <sup>+2</sup> | b <sub>15</sub> -H <sub>3</sub> PO <sub>4</sub> <sup>+2</sup> | 1166.4626               | b <sub>10</sub>                                               | 1895.8705 | y <sub>17</sub> -H <sub>3</sub> PO <sub>4</sub> |
| 302.0998 <sup>+2</sup> | b <sub>5</sub> <sup>+2</sup>                                 | 584.2807 <sup>+2</sup> | b <sub>11</sub> -H <sub>3</sub> PO <sub>4</sub> <sup>+2</sup> | 844.3948               | b <sub>8</sub> -H <sub>3</sub> PO <sub>4</sub>                | 1167.5541               | b <sub>11</sub> -H <sub>3</sub> PO <sub>4</sub>               | 1906.8153 | y <sub>16</sub>                                 |
| 312.1445 <sup>+2</sup> | y <sub>5</sub> <sup>+2</sup>                                 | 595.2746 <sup>+2</sup> | y <sub>10</sub> <sup>+2</sup>                                 | 866.3825               | y <sub>7</sub>                                                | 1189.5419               | y <sub>10</sub>                                               | 1956.7946 | b <sub>17</sub>                                 |
| 350.6262 <sup>+2</sup> | b <sub>6</sub> <sup>+2</sup>                                 | 602.2681               | b <sub>6</sub> -H <sub>3</sub> PO <sub>4</sub>                | 870.4121 <sup>+2</sup> | y <sub>15</sub> <sup>+2</sup>                                 | 1224.5756               | b <sub>12</sub> -H <sub>3</sub> PO <sub>4</sub>               | 1993.8474 | y <sub>17</sub>                                 |
| 358.1797 <sup>+2</sup> | b <sub>7</sub> -H <sub>3</sub> PO <sub>4</sub> <sup>+2</sup> | 603.1923               | b <sub>5</sub>                                                | 877.8715 <sup>+2</sup> | b <sub>15</sub> <sup>+2</sup>                                 | 1265.531                | b <sub>11</sub>                                               | 2032.9294 | MH-H <sub>3</sub> PO <sub>4</sub>               |
| 377.1779               | y <sub>3</sub>                                               | 612.7914 <sup>+2</sup> | b <sub>12</sub> -H <sub>3</sub> PO <sub>4</sub> <sup>+2</sup> | 886.3965 <sup>+2</sup> | b <sub>16</sub> -H <sub>3</sub> PO <sub>4</sub> <sup>+2</sup> | 1318.5845               | y <sub>11</sub>                                               | 2130.9063 | MH                                              |
| 392.0966               | b <sub>3</sub>                                               | 623.2817               | y <sub>5</sub>                                                | 904.9229 <sup>+2</sup> | y <sub>16</sub> -H <sub>3</sub> PO <sub>4</sub> <sup>+2</sup> | 1322.5525               | b <sub>12</sub>                                               |           |                                                 |

MS/MS Fragmentation of ESPRPLQLPGAEGPAISDGEEGGGEPGAGGGAAGAAGAGR  
 Found in IPI00185919, Isoform 1 of La-related protein 1

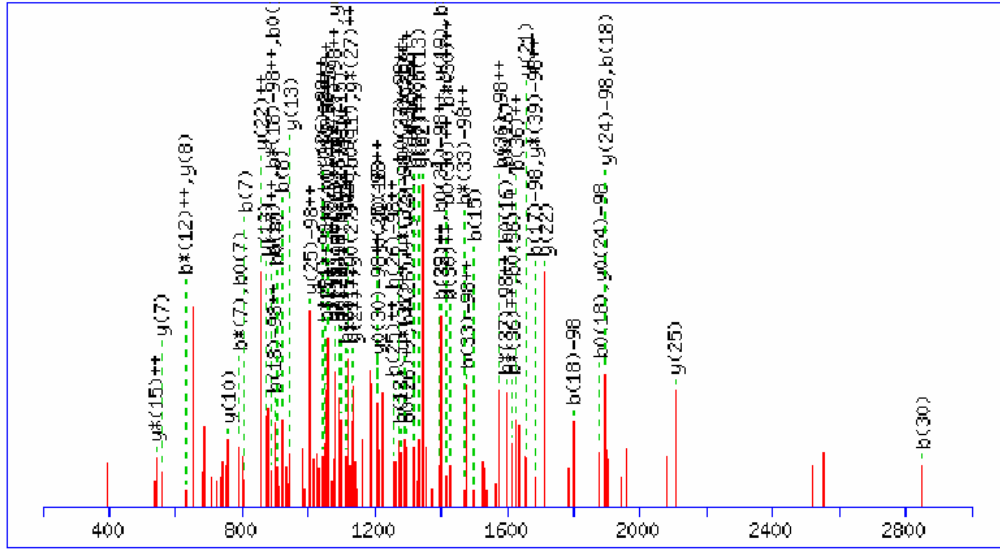

|                        |                               |                         |                                                               |                         |                                                               |                         |                                                               |           |                                                 |
|------------------------|-------------------------------|-------------------------|---------------------------------------------------------------|-------------------------|---------------------------------------------------------------|-------------------------|---------------------------------------------------------------|-----------|-------------------------------------------------|
| 88.0631 <sup>-2</sup>  | y <sub>1</sub> <sup>+2</sup>  | 807.4359 <sup>-2</sup>  | b <sub>16</sub> <sup>+2</sup>                                 | 1256.0554 <sup>-2</sup> | b <sub>25</sub> <sup>+2</sup>                                 | 1647.7604 <sup>-2</sup> | y <sub>37</sub> <sup>+2</sup>                                 | 2567.2009 | b <sub>27</sub> -H <sub>3</sub> PO <sub>4</sub> |
| 116.5738 <sup>+2</sup> | y <sub>2</sub> <sup>+2</sup>  | 808.4312                | b <sub>7</sub>                                                | 1267.0330 <sup>-2</sup> | y <sub>30</sub> <sup>+2</sup>                                 | 1653.2390 <sup>-2</sup> | b <sub>37</sub> <sup>+2</sup>                                 | 2589.156  | y <sub>32</sub> -H <sub>3</sub> PO <sub>4</sub> |
| 152.0924 <sup>+2</sup> | y <sub>3</sub> <sup>+2</sup>  | 815.4118                | y <sub>11</sub>                                               | 1275.6692               | b <sub>12</sub>                                               | 1655.7368               | y <sub>21</sub>                                               | 2590.0802 | y <sub>31</sub>                                 |
| 175.119                | y <sub>1</sub>                | 828.3720 <sup>-2</sup>  | y <sub>21</sub> <sup>+2</sup>                                 | 1283.6087               | y <sub>17</sub>                                               | 1668.2798 <sup>-2</sup> | b <sub>39</sub> -H <sub>3</sub> PO <sub>4</sub> <sup>+2</sup> | 2608.1563 | b <sub>26</sub>                                 |
| 180.6031 <sup>+2</sup> | y <sub>4</sub> <sup>+2</sup>  | 841.9467 <sup>-2</sup>  | b <sub>17</sub> -H <sub>3</sub> PO <sub>4</sub> <sup>+2</sup> | 1284.1041 <sup>-2</sup> | b <sub>27</sub> -H <sub>3</sub> PO <sub>4</sub> <sup>+2</sup> | 1682.886                | b <sub>17</sub> -H <sub>3</sub> PO <sub>4</sub>               | 2638.238  | b <sub>28</sub> -H <sub>3</sub> PO <sub>4</sub> |
| 216.1217 <sup>-2</sup> | y <sub>5</sub> <sup>+2</sup>  | 856.8828 <sup>-2</sup>  | y <sub>22</sub> <sup>+2</sup>                                 | 1295.0817 <sup>-2</sup> | y <sub>32</sub> -H <sub>3</sub> PO <sub>4</sub> <sup>+2</sup> | 1688.7575 <sup>-2</sup> | b <sub>38</sub> <sup>+2</sup>                                 | 2665.1777 | b <sub>27</sub>                                 |
| 217.0819               | b <sub>2</sub>                | 872.4333                | y <sub>12</sub>                                               | 1295.5437 <sup>-2</sup> | y <sub>3</sub> <sup>+2</sup>                                  | 1690.8143 <sup>-2</sup> | y <sub>39</sub> -H <sub>3</sub> PO <sub>4</sub> <sup>+2</sup> | 2687.1329 | y <sub>32</sub>                                 |
| 232.1404               | y <sub>2</sub>                | 890.9351 <sup>-2</sup>  | b <sub>17</sub> <sup>+2</sup>                                 | 1304.5818 <sup>-2</sup> | b <sub>26</sub> <sup>+2</sup>                                 | 1696.2868 <sup>-2</sup> | y <sub>38</sub> <sup>+2</sup>                                 | 2695.2594 | b <sub>29</sub> -H <sub>3</sub> PO <sub>4</sub> |
| 235.6215 <sup>+2</sup> | b <sub>4</sub> <sup>+2</sup>  | 899.4601 <sup>-2</sup>  | b <sub>18</sub> -H <sub>3</sub> PO <sub>4</sub> <sup>+2</sup> | 1319.6226 <sup>-2</sup> | b <sub>28</sub> -H <sub>3</sub> PO <sub>4</sub> <sup>+2</sup> | 1712.7583               | y <sub>22</sub>                                               | 2702.2401 | y <sub>33</sub> -H <sub>3</sub> PO <sub>4</sub> |
| 251.6402 <sup>+2</sup> | y <sub>6</sub> <sup>+2</sup>  | 914.3962 <sup>-2</sup>  | y <sub>23</sub> <sup>+2</sup>                                 | 1332.6906               | b <sub>13</sub>                                               | 1717.2682 <sup>-2</sup> | b <sub>28</sub> <sup>+2</sup>                                 | 2736.2149 | b <sub>28</sub>                                 |
| 280.1510 <sup>-2</sup> | y <sub>7</sub> <sup>+2</sup>  | 921.5152                | b <sub>8</sub>                                                | 1333.0925 <sup>-2</sup> | b <sub>27</sub> <sup>+2</sup>                                 | 1739.8028 <sup>-2</sup> | y <sub>39</sub> <sup>+2</sup>                                 | 2752.2809 | b <sub>30</sub> -H <sub>3</sub> PO <sub>4</sub> |
| 284.1479 <sup>-2</sup> | b <sub>5</sub> <sup>+2</sup>  | 927.9709 <sup>-2</sup>  | b <sub>19</sub> -H <sub>3</sub> PO <sub>4</sub> <sup>+2</sup> | 1340.6302               | y <sub>18</sub>                                               | 1755.3356 <sup>-2</sup> | MH-H <sub>3</sub> PO <sub>4</sub> <sup>+2</sup>               | 2793.2363 | b <sub>29</sub>                                 |
| 303.1775               | y <sub>3</sub>                | 943.4704                | y <sub>13</sub>                                               | 1344.0701 <sup>-2</sup> | y <sub>32</sub> <sup>+2</sup>                                 | 1780.8629               | b <sub>17</sub>                                               | 2800.217  | y <sub>33</sub>                                 |
| 314.1347               | b <sub>3</sub>                | 948.4486 <sup>-2</sup>  | b <sub>18</sub> <sup>+2</sup>                                 | 1348.1334 <sup>-2</sup> | b <sub>29</sub> -H <sub>3</sub> PO <sub>4</sub> <sup>+2</sup> | 1797.913                | b <sub>18</sub> -H <sub>3</sub> PO <sub>4</sub>               | 2809.3024 | b <sub>31</sub> -H <sub>3</sub> PO <sub>4</sub> |
| 315.6695 <sup>-2</sup> | y <sub>8</sub> <sup>+2</sup>  | 948.9070 <sup>-2</sup>  | y <sub>24</sub> -H <sub>3</sub> PO <sub>4</sub> <sup>+2</sup> | 1351.6237 <sup>-2</sup> | y <sub>33</sub> -H <sub>3</sub> PO <sub>4</sub> <sup>+2</sup> | 1804.3241 <sup>-2</sup> | MH <sup>+2</sup>                                              | 2830.2987 | y <sub>34</sub> -H <sub>3</sub> PO <sub>4</sub> |
| 340.6899 <sup>-2</sup> | b <sub>6</sub> <sup>+2</sup>  | 976.9593 <sup>-2</sup>  | b <sub>19</sub> <sup>+2</sup>                                 | 1368.6111 <sup>-2</sup> | b <sub>28</sub> <sup>+2</sup>                                 | 1827.7852               | y <sub>23</sub>                                               | 2850.2578 | b <sub>30</sub>                                 |
| 351.1881 <sup>+2</sup> | y <sub>9</sub> <sup>+2</sup>  | 992.4922 <sup>-2</sup>  | b <sub>20</sub> -H <sub>3</sub> PO <sub>4</sub> <sup>+2</sup> | 1376.6441 <sup>-2</sup> | b <sub>30</sub> -H <sub>3</sub> PO <sub>4</sub> <sup>+2</sup> | 1854.9345               | b <sub>19</sub> -H <sub>3</sub> PO <sub>4</sub>               | 2880.3395 | b <sub>32</sub> -H <sub>3</sub> PO <sub>4</sub> |
| 360.199                | y <sub>4</sub>                | 997.8954 <sup>-2</sup>  | y <sub>24</sub> <sup>+2</sup>                                 | 1397.1218 <sup>-2</sup> | b <sub>29</sub> <sup>+2</sup>                                 | 1895.8899               | b <sub>18</sub>                                               | 2907.2793 | b <sub>31</sub>                                 |
| 379.6988 <sup>-2</sup> | y <sub>10</sub> <sup>+2</sup> | 1000.4919               | y <sub>14</sub>                                               | 1397.6516               | y <sub>19</sub>                                               | 1896.8067               | y <sub>24</sub> -H <sub>3</sub> PO <sub>4</sub>               | 2928.2756 | y <sub>34</sub>                                 |
| 404.7192 <sup>+2</sup> | b <sub>7</sub> <sup>+2</sup>  | 1005.4490 <sup>-2</sup> | y <sub>25</sub> -H <sub>3</sub> PO <sub>4</sub> <sup>+2</sup> | 1400.6121 <sup>-2</sup> | y <sub>33</sub> <sup>+2</sup>                                 | 1952.9113               | b <sub>19</sub>                                               | 2943.3827 | y <sub>35</sub> -H <sub>3</sub> PO <sub>4</sub> |
| 408.2096 <sup>-2</sup> | y <sub>11</sub> <sup>+2</sup> | 1018.568                | b <sub>9</sub>                                                | 1405.1548 <sup>-2</sup> | b <sub>31</sub> -H <sub>3</sub> PO <sub>4</sub> <sup>+2</sup> | 1983.977                | b <sub>20</sub> -H <sub>3</sub> PO <sub>4</sub>               | 2951.3766 | b <sub>33</sub> -H <sub>3</sub> PO <sub>4</sub> |
| 431.2361               | y <sub>5</sub>                | 1040.9676 <sup>-2</sup> | y <sub>26</sub> -H <sub>3</sub> PO <sub>4</sub> <sup>+2</sup> | 1415.6530 <sup>-2</sup> | y <sub>34</sub> -H <sub>3</sub> PO <sub>4</sub> <sup>+2</sup> | 1994.7836               | y <sub>24</sub>                                               | 2978.3164 | b <sub>32</sub>                                 |
| 436.7203 <sup>-2</sup> | y <sub>12</sub> <sup>+2</sup> | 1041.4806 <sup>-2</sup> | b <sub>20</sub> <sup>+2</sup>                                 | 1425.6325 <sup>-2</sup> | b <sub>30</sub> <sup>+2</sup>                                 | 2009.8907               | y <sub>25</sub> -H <sub>3</sub> PO <sub>4</sub>               | 3008.398  | b <sub>34</sub> -H <sub>3</sub> PO <sub>4</sub> |
| 461.2613 <sup>+2</sup> | b <sub>8</sub> <sup>+2</sup>  | 1054.4375 <sup>-2</sup> | y <sub>25</sub> <sup>+2</sup>                                 | 1429.7434               | b <sub>14</sub>                                               | 2080.9279               | y <sub>26</sub> -H <sub>3</sub> PO <sub>4</sub>               | 3040.4355 | y <sub>36</sub> -H <sub>3</sub> PO <sub>4</sub> |
| 470.2358               | b <sub>4</sub>                | 1057.0135 <sup>-2</sup> | b <sub>21</sub> -H <sub>3</sub> PO <sub>4</sub> <sup>+2</sup> | 1440.6734 <sup>-2</sup> | b <sub>32</sub> -H <sub>3</sub> PO <sub>4</sub> <sup>+2</sup> | 2081.9539               | b <sub>20</sub>                                               | 3041.3596 | y <sub>35</sub>                                 |
| 472.2388 <sup>-2</sup> | y <sub>13</sub> <sup>+2</sup> | 1075.5895               | b <sub>10</sub>                                               | 1454.1433 <sup>-2</sup> | b <sub>31</sub> <sup>+2</sup>                                 | 2107.8676               | y <sub>25</sub>                                               | 3049.3535 | b <sub>33</sub>                                 |
| 500.7496 <sup>-2</sup> | y <sub>14</sub> <sup>+2</sup> | 1085.5242 <sup>-2</sup> | b <sub>22</sub> -H <sub>3</sub> PO <sub>4</sub> <sup>+2</sup> | 1464.6414 <sup>-2</sup> | y <sub>34</sub> <sup>+2</sup>                                 | 2113.0196               | b <sub>21</sub> -H <sub>3</sub> PO <sub>4</sub>               | 3079.4352 | b <sub>35</sub> -H <sub>3</sub> PO <sub>4</sub> |
| 502.2732               | y <sub>6</sub>                | 1089.4940 <sup>-2</sup> | y <sub>27</sub> -H <sub>3</sub> PO <sub>4</sub> <sup>+2</sup> | 1472.1950 <sup>-2</sup> | y <sub>35</sub> -H <sub>3</sub> PO <sub>4</sub> <sup>+2</sup> | 2170.0411               | b <sub>22</sub> -H <sub>3</sub> PO <sub>4</sub>               | 3106.3749 | b <sub>34</sub>                                 |
| 509.7876 <sup>-2</sup> | b <sub>9</sub> <sup>+2</sup>  | 1089.9560 <sup>-2</sup> | y <sub>26</sub> <sup>+2</sup>                                 | 1476.1919 <sup>-2</sup> | b <sub>33</sub> -H <sub>3</sub> PO <sub>4</sub> <sup>+2</sup> | 2177.9806               | y <sub>27</sub> -H <sub>3</sub> PO <sub>4</sub>               | 3138.4124 | y <sub>36</sub>                                 |
| 538.2984 <sup>-2</sup> | b <sub>10</sub> <sup>+2</sup> | 1097.5446               | y <sub>15</sub>                                               | 1489.6618 <sup>-2</sup> | b <sub>32</sub> <sup>+2</sup>                                 | 2178.9048               | y <sub>26</sub>                                               | 3150.4723 | b <sub>36</sub> -H <sub>3</sub> PO <sub>4</sub> |
| 549.2760 <sup>-2</sup> | y <sub>15</sub> <sup>+2</sup> | 1106.0019 <sup>-2</sup> | b <sub>21</sub> <sup>+2</sup>                                 | 1500.7805               | b <sub>15</sub>                                               | 2210.9965               | b <sub>21</sub>                                               | 3177.4121 | b <sub>35</sub>                                 |
| 559.2947               | y <sub>7</sub>                | 1114.0349 <sup>-2</sup> | b <sub>23</sub> -H <sub>3</sub> PO <sub>4</sub> <sup>+2</sup> | 1504.7027 <sup>-2</sup> | b <sub>34</sub> -H <sub>3</sub> PO <sub>4</sub> <sup>+2</sup> | 2227.0626               | b <sub>23</sub> -H <sub>3</sub> PO <sub>4</sub>               | 3196.5366 | y <sub>37</sub> -H <sub>3</sub> PO <sub>4</sub> |
| 567.2885               | b <sub>5</sub>                | 1118.0047 <sup>-2</sup> | y <sub>28</sub> -H <sub>3</sub> PO <sub>4</sub> <sup>+2</sup> | 1520.7214 <sup>-2</sup> | y <sub>36</sub> -H <sub>3</sub> PO <sub>4</sub> <sup>+2</sup> | 2235.0021               | y <sub>28</sub> -H <sub>3</sub> PO <sub>4</sub>               | 3207.4937 | b <sub>37</sub> -H <sub>3</sub> PO <sub>4</sub> |
| 573.8169 <sup>+2</sup> | b <sub>11</sub> <sup>+2</sup> | 1134.5126 <sup>-2</sup> | b <sub>22</sub> <sup>+2</sup>                                 | 1521.1835 <sup>-2</sup> | y <sub>35</sub> <sup>+2</sup>                                 | 2268.018                | b <sub>22</sub>                                               | 3248.4492 | b <sub>36</sub>                                 |
| 613.7973 <sup>+2</sup> | y <sub>16</sub> <sup>+2</sup> | 1138.4824 <sup>-2</sup> | y <sub>27</sub> <sup>+2</sup>                                 | 1525.1804 <sup>-2</sup> | b <sub>33</sub> <sup>+2</sup>                                 | 2275.9575               | y <sub>27</sub>                                               | 3278.5309 | b <sub>38</sub> -H <sub>3</sub> PO <sub>4</sub> |
| 630.3318               | y <sub>8</sub>                | 1142.5457 <sup>-2</sup> | b <sub>24</sub> -H <sub>3</sub> PO <sub>4</sub> <sup>+2</sup> | 1526.6942               | y <sub>20</sub>                                               | 2284.084                | b <sub>24</sub> -H <sub>3</sub> PO <sub>4</sub>               | 3293.5894 | y <sub>38</sub> -H <sub>3</sub> PO <sub>4</sub> |
| 638.3382 <sup>-2</sup> | b <sub>12</sub> <sup>+2</sup> | 1146.6266               | b <sub>11</sub>                                               | 1540.2212 <sup>-2</sup> | b <sub>35</sub> -H <sub>3</sub> PO <sub>4</sub> <sup>+2</sup> | 2325.0395               | b <sub>23</sub>                                               | 3294.5135 | y <sub>37</sub>                                 |
| 642.3080 <sup>+2</sup> | y <sub>17</sub> <sup>+2</sup> | 1163.0234 <sup>-2</sup> | b <sub>23</sub> <sup>+2</sup>                                 | 1553.6911 <sup>-2</sup> | b <sub>34</sub> <sup>+2</sup>                                 | 2332.979                | y <sub>28</sub>                                               | 3305.4706 | b <sub>37</sub>                                 |
| 666.8490 <sup>+2</sup> | b <sub>13</sub> <sup>+2</sup> | 1166.9931 <sup>-2</sup> | y <sub>28</sub> <sup>+2</sup>                                 | 1569.7098 <sup>-2</sup> | y <sub>36</sub> <sup>+2</sup>                                 | 2364.0447               | y <sub>29</sub> -H <sub>3</sub> PO <sub>4</sub>               | 3335.5523 | b <sub>39</sub> -H <sub>3</sub> PO <sub>4</sub> |
| 670.8187 <sup>+2</sup> | y <sub>18</sub> <sup>+2</sup> | 1182.5260 <sup>-2</sup> | y <sub>29</sub> -H <sub>3</sub> PO <sub>4</sub> <sup>+2</sup> | 1575.7398 <sup>-2</sup> | b <sub>36</sub> -H <sub>3</sub> PO <sub>4</sub> <sup>+2</sup> | 2382.0609               | b <sub>24</sub>                                               | 3376.5077 | b <sub>38</sub>                                 |
| 680.3726               | b <sub>6</sub>                | 1191.5341 <sup>-2</sup> | b <sub>24</sub> <sup>+2</sup>                                 | 1589.2097 <sup>-2</sup> | b <sub>35</sub> <sup>+2</sup>                                 | 2413.1266               | b <sub>25</sub> -H <sub>3</sub> PO <sub>4</sub>               | 3380.6214 | y <sub>39</sub> -H <sub>3</sub> PO <sub>4</sub> |
| 699.3295 <sup>-2</sup> | y <sub>19</sub> <sup>+2</sup> | 1207.0669 <sup>-2</sup> | b <sub>25</sub> -H <sub>3</sub> PO <sub>4</sub> <sup>+2</sup> | 1598.7719 <sup>-2</sup> | y <sub>37</sub> -H <sub>3</sub> PO <sub>4</sub> <sup>+2</sup> | 2435.0818               | y <sub>30</sub> -H <sub>3</sub> PO <sub>4</sub>               | 3391.5663 | y <sub>38</sub>                                 |
| 701.3689               | y <sub>9</sub>                | 1218.0445 <sup>-2</sup> | y <sub>30</sub> -H <sub>3</sub> PO <sub>4</sub> <sup>+2</sup> | 1604.2505 <sup>-2</sup> | b <sub>37</sub> -H <sub>3</sub> PO <sub>4</sub> <sup>+2</sup> | 2462.0216               | y <sub>29</sub>                                               | 3433.5292 | b <sub>39</sub>                                 |
| 715.3753 <sup>-2</sup> | b <sub>14</sub> <sup>+2</sup> | 1226.5872               | y <sub>16</sub>                                               | 1613.8646               | b <sub>16</sub>                                               | 2492.1033               | y <sub>31</sub> -H <sub>3</sub> PO <sub>4</sub>               | 3478.5983 | y <sub>39</sub>                                 |
| 750.8939 <sup>-2</sup> | b <sub>15</sub> <sup>+2</sup> | 1231.5144 <sup>-2</sup> | y <sub>29</sub> <sup>+2</sup>                                 | 1624.7282 <sup>-2</sup> | b <sub>36</sub> <sup>+2</sup>                                 | 2510.1794               | b <sub>26</sub> -H <sub>3</sub> PO <sub>4</sub>               | 3509.664  | MH-H <sub>3</sub> PO <sub>4</sub>               |
| 758.3904               | y <sub>10</sub>               | 1246.5553 <sup>-2</sup> | y <sub>31</sub> -H <sub>3</sub> PO <sub>4</sub> <sup>+2</sup> | 1639.7691 <sup>-2</sup> | b <sub>38</sub> -H <sub>3</sub> PO <sub>4</sub> <sup>+2</sup> | 2511.1035               | b <sub>25</sub>                                               | 3607.6409 | MH                                              |
| 763.8507 <sup>-2</sup> | y <sub>20</sub> <sup>+2</sup> | 1255.5933 <sup>-2</sup> | b <sub>26</sub> -H <sub>3</sub> PO <sub>4</sub> <sup>+2</sup> | 1647.2983 <sup>-2</sup> | y <sub>38</sub> -H <sub>3</sub> PO <sub>4</sub> <sup>+2</sup> | 2533.0587               | y <sub>30</sub>                                               |           |                                                 |



MS/MS Fragmentation of RTDGGSTAsLGGEIK  
 Found in IPI00747018, Similar to Sodium- and chloride-dependent creatine transporter 2

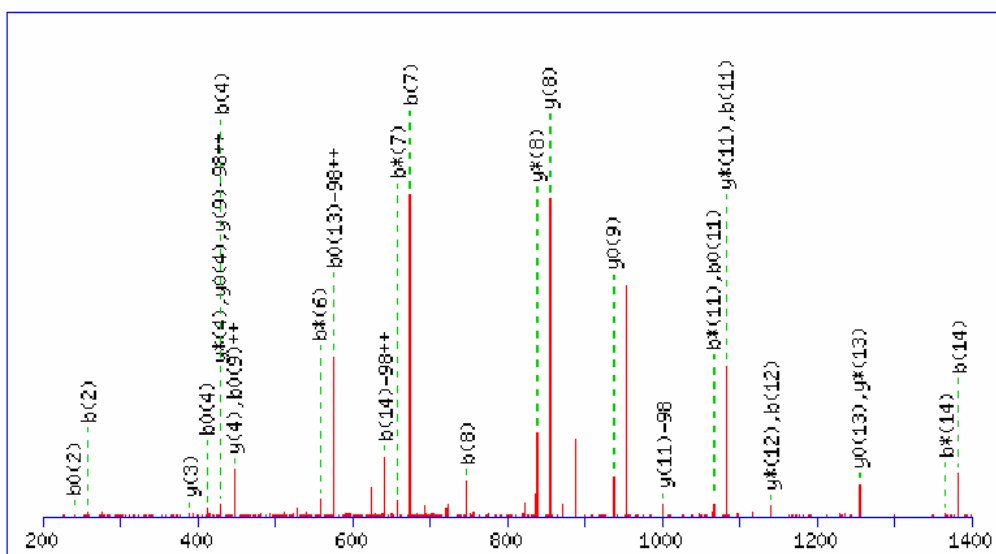

|                        |                                                              |                        |                                                               |                        |                                                               |                        |                                                 |           |                                                 |
|------------------------|--------------------------------------------------------------|------------------------|---------------------------------------------------------------|------------------------|---------------------------------------------------------------|------------------------|-------------------------------------------------|-----------|-------------------------------------------------|
| 74.0600 <sup>+2</sup>  | y <sub>1</sub> <sup>+2</sup>                                 | 378.7162 <sup>+2</sup> | y <sub>8</sub> -H <sub>3</sub> PO <sub>4</sub> <sup>+2</sup>  | 521.7492 <sup>+2</sup> | b <sub>12</sub> -H <sub>3</sub> PO <sub>4</sub> <sup>+2</sup> | 715.8653 <sup>+2</sup> | MH-H <sub>3</sub> PO <sub>4</sub> <sup>+2</sup> | 1083.4466 | b <sub>11</sub>                                 |
| 129.5817 <sup>+2</sup> | b <sub>2</sub> <sup>+2</sup>                                 | 389.2395               | y <sub>3</sub>                                                | 529.7775 <sup>+2</sup> | y <sub>12</sub> -H <sub>3</sub> PO <sub>4</sub> <sup>+2</sup> | 746.3428               | b <sub>8</sub>                                  | 1099.5031 | y <sub>11</sub>                                 |
| 130.6021 <sup>+2</sup> | y <sub>2</sub> <sup>+2</sup>                                 | 392.1860 <sup>+2</sup> | y <sub>7</sub> <sup>+2</sup>                                  | 542.2270 <sup>+2</sup> | b <sub>11</sub> <sup>+2</sup>                                 | 756.425                | y <sub>8</sub> -H <sub>3</sub> PO <sub>4</sub>  | 1140.4681 | b <sub>12</sub>                                 |
| 147.1128               | y <sub>1</sub>                                               | 408.1857 <sup>+2</sup> | b <sub>9</sub> -H <sub>3</sub> PO <sub>4</sub> <sup>+2</sup>  | 550.2552 <sup>+2</sup> | y <sub>11</sub> <sup>+2</sup>                                 | 764.8538 <sup>+2</sup> | MH <sup>+2</sup>                                | 1156.5246 | y <sub>12</sub>                                 |
| 187.0951 <sup>+2</sup> | b <sub>3</sub> <sup>+2</sup>                                 | 427.7046 <sup>+2</sup> | y <sub>8</sub> <sup>+2</sup>                                  | 570.7377 <sup>+2</sup> | b <sub>12</sub> <sup>+2</sup>                                 | 783.3648               | y <sub>7</sub>                                  | 1171.5338 | b <sub>13</sub> -H <sub>3</sub> PO <sub>4</sub> |
| 195.1234 <sup>+2</sup> | y <sub>3</sub> <sup>+2</sup>                                 | 429.2400 <sup>+2</sup> | y <sub>9</sub> -H <sub>3</sub> PO <sub>4</sub> <sup>+2</sup>  | 574.258                | b <sub>6</sub>                                                | 815.3642               | b <sub>9</sub> -H <sub>3</sub> PO <sub>4</sub>  | 1173.5746 | y <sub>13</sub> -H <sub>3</sub> PO <sub>4</sub> |
| 215.6059 <sup>+2</sup> | b <sub>4</sub> <sup>+2</sup>                                 | 430.2045               | b <sub>4</sub>                                                | 578.7659 <sup>+2</sup> | y <sub>12</sub> <sup>+2</sup>                                 | 854.4019               | y <sub>8</sub>                                  | 1269.5107 | b <sub>13</sub>                                 |
| 223.6341 <sup>+2</sup> | y <sub>4</sub> <sup>+2</sup>                                 | 446.2609               | y <sub>4</sub>                                                | 586.2705 <sup>+2</sup> | b <sub>13</sub> -H <sub>3</sub> PO <sub>4</sub> <sup>+2</sup> | 857.4727               | y <sub>9</sub> -H <sub>3</sub> PO <sub>4</sub>  | 1271.5515 | y <sub>13</sub>                                 |
| 244.1166 <sup>+2</sup> | b <sub>5</sub> <sup>+2</sup>                                 | 457.1742 <sup>+2</sup> | b <sub>9</sub> <sup>+2</sup>                                  | 587.2909 <sup>+2</sup> | y <sub>13</sub> -H <sub>3</sub> PO <sub>4</sub> <sup>+2</sup> | 913.3411               | b <sub>9</sub>                                  | 1274.6223 | y <sub>14</sub> -H <sub>3</sub> PO <sub>4</sub> |
| 252.1448 <sup>+2</sup> | y <sub>5</sub> <sup>+2</sup>                                 | 464.7278 <sup>+2</sup> | b <sub>10</sub> -H <sub>3</sub> PO <sub>4</sub> <sup>+2</sup> | 616.3665               | y <sub>6</sub>                                                | 928.4483               | b <sub>10</sub> -H <sub>3</sub> PO <sub>4</sub> | 1284.6179 | b <sub>14</sub> -H <sub>3</sub> PO <sub>4</sub> |
| 258.1561               | b <sub>2</sub>                                               | 472.7560 <sup>+2</sup> | y <sub>10</sub> -H <sub>3</sub> PO <sub>4</sub> <sup>+2</sup> | 635.2590 <sup>+2</sup> | b <sub>13</sub> <sup>+2</sup>                                 | 944.5047               | y <sub>10</sub> -H <sub>3</sub> PO <sub>4</sub> | 1372.5992 | y <sub>14</sub>                                 |
| 260.1969               | y <sub>2</sub>                                               | 478.2284 <sup>+2</sup> | y <sub>9</sub> <sup>+2</sup>                                  | 636.2794 <sup>+2</sup> | y <sub>13</sub> <sup>+2</sup>                                 | 955.4496               | y <sub>9</sub>                                  | 1382.5948 | b <sub>14</sub>                                 |
| 287.6326 <sup>+2</sup> | b <sub>6</sub> <sup>+2</sup>                                 | 487.2259               | b <sub>5</sub>                                                | 637.8148 <sup>+2</sup> | y <sub>14</sub> -H <sub>3</sub> PO <sub>4</sub> <sup>+2</sup> | 985.4697               | b <sub>11</sub> -H <sub>3</sub> PO <sub>4</sub> | 1430.7234 | MH-H <sub>3</sub> PO <sub>4</sub>               |
| 308.6869 <sup>+2</sup> | y <sub>6</sub> <sup>+2</sup>                                 | 493.2385 <sup>+2</sup> | b <sub>11</sub> -H <sub>3</sub> PO <sub>4</sub> <sup>+2</sup> | 642.8126 <sup>+2</sup> | b <sub>14</sub> -H <sub>3</sub> PO <sub>4</sub> <sup>+2</sup> | 1001.5262              | y <sub>11</sub> -H <sub>3</sub> PO <sub>4</sub> | 1528.7003 | MH                                              |
| 338.1565 <sup>+2</sup> | b <sub>7</sub> <sup>+2</sup>                                 | 501.2667 <sup>+2</sup> | y <sub>11</sub> -H <sub>3</sub> PO <sub>4</sub> <sup>+2</sup> | 675.3056               | b <sub>7</sub>                                                | 1026.4252              | b <sub>10</sub>                                 |           |                                                 |
| 343.1976 <sup>+2</sup> | y <sub>7</sub> -H <sub>3</sub> PO <sub>4</sub> <sup>+2</sup> | 503.2824               | y <sub>5</sub>                                                | 685.3879               | y <sub>7</sub> -H <sub>3</sub> PO <sub>4</sub>                | 1042.4816              | y <sub>10</sub>                                 |           |                                                 |
| 373.183                | b <sub>3</sub>                                               | 513.7162 <sup>+2</sup> | b <sub>10</sub> <sup>+2</sup>                                 | 686.8032 <sup>+2</sup> | y <sub>14</sub> <sup>+2</sup>                                 | 1042.4912              | b <sub>12</sub> -H <sub>3</sub> PO <sub>4</sub> |           |                                                 |
| 373.6750 <sup>+2</sup> | b <sub>8</sub> <sup>+2</sup>                                 | 521.7445 <sup>+2</sup> | y <sub>10</sub> <sup>+2</sup>                                 | 691.8010 <sup>+2</sup> | b <sub>14</sub> <sup>+2</sup>                                 | 1058.5477              | y <sub>12</sub> -H <sub>3</sub> PO <sub>4</sub> |           |                                                 |

MS/MS Fragmentation of SHsSPASLQLGTGAGAAGSPAQQHAHLR  
 Found in IPI00180266, WW domain-containing transcription regulator protein 1

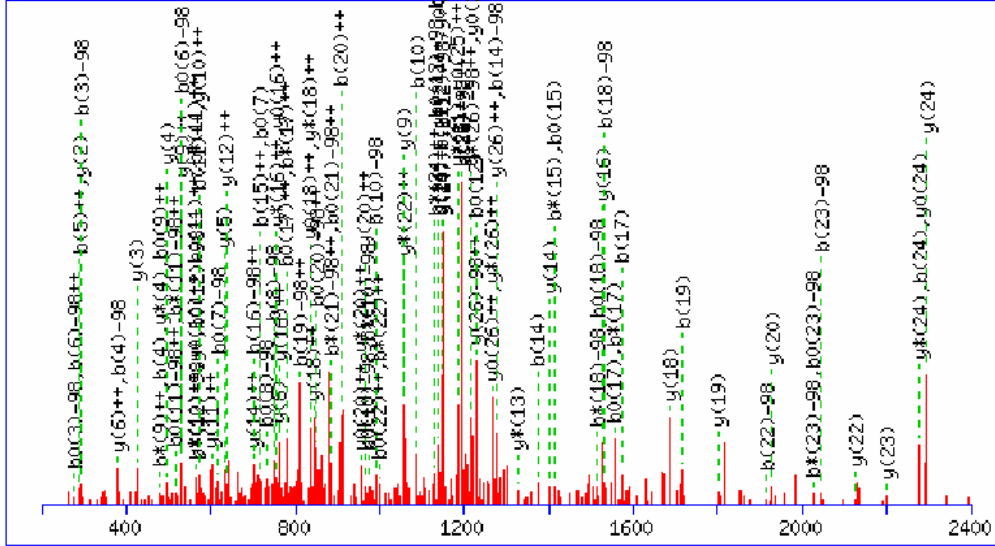

|                        |                                                               |                        |                                                               |                         |                                                               |                         |                                                               |           |                                                 |
|------------------------|---------------------------------------------------------------|------------------------|---------------------------------------------------------------|-------------------------|---------------------------------------------------------------|-------------------------|---------------------------------------------------------------|-----------|-------------------------------------------------|
| 88.0631 <sup>+2</sup>  | y <sub>1</sub> <sup>+2</sup>                                  | 496.299                | y <sub>4</sub>                                                | 810.3922 <sup>+2</sup>  | b <sub>19</sub> -H <sub>3</sub> PO <sub>4</sub> <sup>+2</sup> | 1148.5989 <sup>+2</sup> | y <sub>24</sub> <sup>+2</sup>                                 | 1630.7221 | b <sub>18</sub>                                 |
| 113.0527 <sup>+2</sup> | b <sub>2</sub> <sup>+2</sup>                                  | 524.2645 <sup>+2</sup> | b <sub>11</sub> -H <sub>3</sub> PO <sub>4</sub> <sup>+2</sup> | 815.4139 <sup>+2</sup>  | y <sub>17</sub> <sup>+2</sup>                                 | 1175.5322 <sup>+2</sup> | b <sub>25</sub> <sup>+2</sup>                                 | 1686.8419 | y <sub>18</sub>                                 |
| 144.6051 <sup>+2</sup> | y <sub>2</sub> <sup>+2</sup>                                  | 529.2861 <sup>+2</sup> | y <sub>9</sub> <sup>+2</sup>                                  | 815.8647 <sup>+2</sup>  | b <sub>18</sub> <sup>+2</sup>                                 | 1192.1149 <sup>+2</sup> | y <sub>25</sub> <sup>+2</sup>                                 | 1716.83   | b <sub>20</sub> -H <sub>3</sub> PO <sub>4</sub> |
| 147.5635 <sup>+2</sup> | b <sub>3</sub> -H <sub>3</sub> PO <sub>4</sub> <sup>+2</sup>  | 544.7422 <sup>+2</sup> | b <sub>10</sub> <sup>+2</sup>                                 | 843.9246 <sup>+2</sup>  | y <sub>18</sub> <sup>+2</sup>                                 | 1195.0732 <sup>+2</sup> | b <sub>26</sub> -H <sub>3</sub> PO <sub>4</sub> <sup>+2</sup> | 1717.7541 | b <sub>19</sub>                                 |
| 175.119                | y <sub>1</sub>                                                | 549.2416               | b <sub>6</sub> -H <sub>3</sub> PO <sub>4</sub>                | 847.3346                | b <sub>8</sub>                                                | 1201.6185               | y <sub>11</sub>                                               | 1787.8671 | b <sub>21</sub> -H <sub>3</sub> PO <sub>4</sub> |
| 191.0795 <sup>+2</sup> | b <sub>4</sub> -H <sub>3</sub> PO <sub>4</sub> <sup>+2</sup>  | 572.8021 <sup>+2</sup> | y <sub>10</sub> <sup>+2</sup>                                 | 858.9186 <sup>+2</sup>  | b <sub>20</sub> -H <sub>3</sub> PO <sub>4</sub> <sup>+2</sup> | 1205.5909               | b <sub>13</sub> -H <sub>3</sub> PO <sub>4</sub>               | 1799.926  | y <sub>19</sub>                                 |
| 196.5519 <sup>+2</sup> | b <sub>3</sub> <sup>+2</sup>                                  | 573.2530 <sup>+2</sup> | b <sub>11</sub> <sup>+2</sup>                                 | 859.3807 <sup>+2</sup>  | b <sub>19</sub> <sup>+2</sup>                                 | 1226.6256 <sup>+2</sup> | y <sub>26</sub> -H <sub>3</sub> PO <sub>4</sub> <sup>+2</sup> | 1814.8069 | b <sub>20</sub>                                 |
| 213.1346 <sup>+2</sup> | y <sub>3</sub> <sup>+2</sup>                                  | 574.7884 <sup>+2</sup> | b <sub>12</sub> -H <sub>3</sub> PO <sub>4</sub> <sup>+2</sup> | 877.4163                | b <sub>9</sub> -H <sub>3</sub> PO <sub>4</sub>                | 1244.0617 <sup>+2</sup> | b <sub>26</sub> <sup>+2</sup>                                 | 1885.844  | b <sub>21</sub>                                 |
| 225.0982               | b <sub>2</sub>                                                | 576.1814               | b <sub>5</sub>                                                | 889.4751                | y <sub>7</sub>                                                | 1246.5464               | b <sub>12</sub>                                               | 1915.9257 | b <sub>22</sub> -H <sub>3</sub> PO <sub>4</sub> |
| 239.6059 <sup>+2</sup> | b <sub>5</sub> -H <sub>3</sub> PO <sub>4</sub> <sup>+2</sup>  | 601.3129 <sup>+2</sup> | y <sub>11</sub> <sup>+2</sup>                                 | 894.4372 <sup>+2</sup>  | b <sub>21</sub> -H <sub>3</sub> PO <sub>4</sub> <sup>+2</sup> | 1251.6153 <sup>+2</sup> | b <sub>27</sub> -H <sub>3</sub> PO <sub>4</sub> <sup>+2</sup> | 1927.9845 | y <sub>20</sub>                                 |
| 240.0679 <sup>+2</sup> | b <sub>4</sub> <sup>+2</sup>                                  | 603.2991 <sup>+2</sup> | b <sub>13</sub> -H <sub>3</sub> PO <sub>4</sub> <sup>+2</sup> | 900.4666 <sup>+2</sup>  | y <sub>19</sub> <sup>+2</sup>                                 | 1272.6556               | y <sub>12</sub>                                               | 2013.9026 | b <sub>22</sub>                                 |
| 248.6532 <sup>+2</sup> | y <sub>4</sub> <sup>+2</sup>                                  | 623.7768 <sup>+2</sup> | b <sub>12</sub> <sup>+2</sup>                                 | 907.9071 <sup>+2</sup>  | b <sub>20</sub> <sup>+2</sup>                                 | 1275.6141 <sup>+2</sup> | y <sub>26</sub> <sup>+2</sup>                                 | 2041.0686 | y <sub>21</sub>                                 |
| 275.1244 <sup>+2</sup> | b <sub>6</sub> -H <sub>3</sub> PO <sub>4</sub> <sup>+2</sup>  | 633.358                | y <sub>5</sub>                                                | 943.4256 <sup>+2</sup>  | b <sub>21</sub> <sup>+2</sup>                                 | 1276.628                | b <sub>14</sub> -H <sub>3</sub> PO <sub>4</sub>               | 2043.9843 | b <sub>23</sub> -H <sub>3</sub> PO <sub>4</sub> |
| 288.203                | y <sub>2</sub>                                                | 636.2736               | b <sub>7</sub> -H <sub>3</sub> PO <sub>4</sub>                | 958.4665 <sup>+2</sup>  | b <sub>22</sub> -H <sub>3</sub> PO <sub>4</sub> <sup>+2</sup> | 1295.1551 <sup>+2</sup> | y <sub>27</sub> -H <sub>3</sub> PO <sub>4</sub> <sup>+2</sup> | 2128.1006 | y <sub>22</sub>                                 |
| 288.5943 <sup>+2</sup> | b <sub>3</sub> <sup>+2</sup>                                  | 636.8314 <sup>+2</sup> | y <sub>12</sub> <sup>+2</sup>                                 | 960.5122                | y <sub>8</sub>                                                | 1300.6037 <sup>+2</sup> | b <sub>27</sub> <sup>+2</sup>                                 | 2141.9612 | b <sub>23</sub>                                 |
| 294.1197               | b <sub>3</sub> -H <sub>3</sub> PO <sub>4</sub>                | 638.8177 <sup>+2</sup> | b <sub>14</sub> -H <sub>3</sub> PO <sub>4</sub> <sup>+2</sup> | 964.4959 <sup>+2</sup>  | y <sub>20</sub> <sup>+2</sup>                                 | 1303.5678               | b <sub>13</sub>                                               | 2181.0432 | b <sub>24</sub> -H <sub>3</sub> PO <sub>4</sub> |
| 317.1826 <sup>+2</sup> | y <sub>5</sub> <sup>+2</sup>                                  | 647.2185               | b <sub>6</sub>                                                | 975.3932                | b <sub>9</sub>                                                | 1333.6495               | b <sub>15</sub> -H <sub>3</sub> PO <sub>4</sub>               | 2199.1377 | y <sub>23</sub>                                 |
| 318.6404 <sup>+2</sup> | b <sub>7</sub> -H <sub>3</sub> PO <sub>4</sub> <sup>+2</sup>  | 652.2875 <sup>+2</sup> | b <sub>13</sub> <sup>+2</sup>                                 | 990.5003                | b <sub>10</sub> -H <sub>3</sub> PO <sub>4</sub>               | 1338.6711 <sup>+2</sup> | MH-H <sub>3</sub> PO <sub>4</sub> <sup>+2</sup>               | 2252.0803 | b <sub>25</sub> -H <sub>3</sub> PO <sub>4</sub> |
| 324.1129 <sup>+2</sup> | b <sub>6</sub> <sup>+2</sup>                                  | 667.3284 <sup>+2</sup> | b <sub>15</sub> -H <sub>3</sub> PO <sub>4</sub> <sup>+2</sup> | 1007.4549 <sup>+2</sup> | b <sub>22</sub> <sup>+2</sup>                                 | 1343.6927               | y <sub>13</sub>                                               | 2279.0201 | b <sub>24</sub>                                 |
| 367.6289 <sup>+2</sup> | b <sub>7</sub> <sup>+2</sup>                                  | 672.3500 <sup>+2</sup> | y <sub>13</sub> <sup>+2</sup>                                 | 1021.0379 <sup>+2</sup> | y <sub>21</sub> <sup>+2</sup>                                 | 1344.1435 <sup>+2</sup> | y <sub>27</sub> <sup>+2</sup>                                 | 2296.1905 | y <sub>24</sub>                                 |
| 375.1825 <sup>+2</sup> | b <sub>8</sub> -H <sub>3</sub> PO <sub>4</sub> <sup>+2</sup>  | 687.8061 <sup>+2</sup> | b <sub>14</sub> <sup>+2</sup>                                 | 1022.4958 <sup>+2</sup> | b <sub>23</sub> -H <sub>3</sub> PO <sub>4</sub> <sup>+2</sup> | 1374.6049               | b <sub>14</sub>                                               | 2350.0572 | b <sub>25</sub>                                 |
| 381.1517               | b <sub>4</sub> -H <sub>3</sub> PO <sub>4</sub>                | 700.8607 <sup>+2</sup> | y <sub>14</sub> <sup>+2</sup>                                 | 1047.5218               | b <sub>11</sub> -H <sub>3</sub> PO <sub>4</sub>               | 1387.6596 <sup>+2</sup> | MH <sup>+2</sup>                                              | 2383.2225 | y <sub>25</sub>                                 |
| 381.2119 <sup>+2</sup> | y <sub>6</sub> <sup>+2</sup>                                  | 702.8469 <sup>+2</sup> | b <sub>16</sub> -H <sub>3</sub> PO <sub>4</sub> <sup>+2</sup> | 1057.565                | y <sub>9</sub>                                                | 1400.7142               | y <sub>14</sub>                                               | 2389.1392 | b <sub>26</sub> -H <sub>3</sub> PO <sub>4</sub> |
| 392.0966               | b <sub>3</sub>                                                | 716.3168 <sup>+2</sup> | b <sub>15</sub> <sup>+2</sup>                                 | 1064.5539 <sup>+2</sup> | y <sub>22</sub> <sup>+2</sup>                                 | 1404.6866               | b <sub>16</sub> -H <sub>3</sub> PO <sub>4</sub>               | 2452.244  | y <sub>26</sub> -H <sub>3</sub> PO <sub>4</sub> |
| 424.1709 <sup>+2</sup> | b <sub>8</sub> <sup>+2</sup>                                  | 734.2505               | b <sub>7</sub>                                                | 1071.4842 <sup>+2</sup> | b <sub>23</sub> <sup>+2</sup>                                 | 1431.6264               | b <sub>15</sub>                                               | 2487.1161 | b <sub>26</sub>                                 |
| 425.2619               | y <sub>3</sub>                                                | 736.3793 <sup>+2</sup> | y <sub>15</sub> <sup>+2</sup>                                 | 1088.4772               | b <sub>10</sub>                                               | 1471.7513               | y <sub>15</sub>                                               | 2502.2233 | b <sub>27</sub> -H <sub>3</sub> PO <sub>4</sub> |
| 439.2118 <sup>+2</sup> | b <sub>9</sub> -H <sub>3</sub> PO <sub>4</sub> <sup>+2</sup>  | 738.3655 <sup>+2</sup> | b <sub>17</sub> -H <sub>3</sub> PO <sub>4</sub> <sup>+2</sup> | 1091.0252 <sup>+2</sup> | b <sub>24</sub> -H <sub>3</sub> PO <sub>4</sub> <sup>+2</sup> | 1475.7237               | b <sub>17</sub> -H <sub>3</sub> PO <sub>4</sub>               | 2550.2209 | y <sub>26</sub>                                 |
| 445.2412 <sup>+2</sup> | y <sub>7</sub> <sup>+2</sup>                                  | 749.3577               | b <sub>8</sub> -H <sub>3</sub> PO <sub>4</sub>                | 1100.0725 <sup>+2</sup> | y <sub>23</sub> <sup>+2</sup>                                 | 1502.6635               | b <sub>16</sub>                                               | 2589.3029 | y <sub>27</sub> -H <sub>3</sub> PO <sub>4</sub> |
| 478.2045               | b <sub>5</sub> -H <sub>3</sub> PO <sub>4</sub>                | 751.8354 <sup>+2</sup> | b <sub>16</sub> <sup>+2</sup>                                 | 1126.5438 <sup>+2</sup> | b <sub>25</sub> -H <sub>3</sub> PO <sub>4</sub> <sup>+2</sup> | 1528.7727               | y <sub>16</sub>                                               | 2600.2002 | b <sub>27</sub>                                 |
| 479.1286               | b <sub>4</sub>                                                | 761.4165               | y <sub>6</sub>                                                | 1140.0137 <sup>+2</sup> | b <sub>24</sub> <sup>+2</sup>                                 | 1532.7452               | b <sub>18</sub> -H <sub>3</sub> PO <sub>4</sub>               | 2676.3349 | MH-H <sub>3</sub> PO <sub>4</sub>               |
| 480.7597 <sup>+2</sup> | y <sub>8</sub> <sup>+2</sup>                                  | 764.8900 <sup>+2</sup> | y <sub>16</sub> <sup>+2</sup>                                 | 1144.597                | y <sub>10</sub>                                               | 1573.7006               | b <sub>17</sub>                                               | 2687.2798 | y <sub>27</sub>                                 |
| 488.2002 <sup>+2</sup> | b <sub>9</sub> <sup>+2</sup>                                  | 766.8762 <sup>+2</sup> | b <sub>18</sub> -H <sub>3</sub> PO <sub>4</sub> <sup>+2</sup> | 1145.4987               | b <sub>11</sub>                                               | 1619.7772               | b <sub>19</sub> -H <sub>3</sub> PO <sub>4</sub>               | 2774.3118 | MH                                              |
| 495.7538 <sup>+2</sup> | b <sub>10</sub> -H <sub>3</sub> PO <sub>4</sub> <sup>+2</sup> | 787.3540 <sup>+2</sup> | b <sub>17</sub> <sup>+2</sup>                                 | 1148.5695               | b <sub>12</sub> -H <sub>3</sub> PO <sub>4</sub>               | 1629.8204               | y <sub>17</sub>                                               |           |                                                 |

MS/MS Fragmentation of DFTNEAPPAPLPDASA(S)PL(S)PHR  
 Found in IPI00295457, myosin phosphatase-Rho interacting protein isoform 1

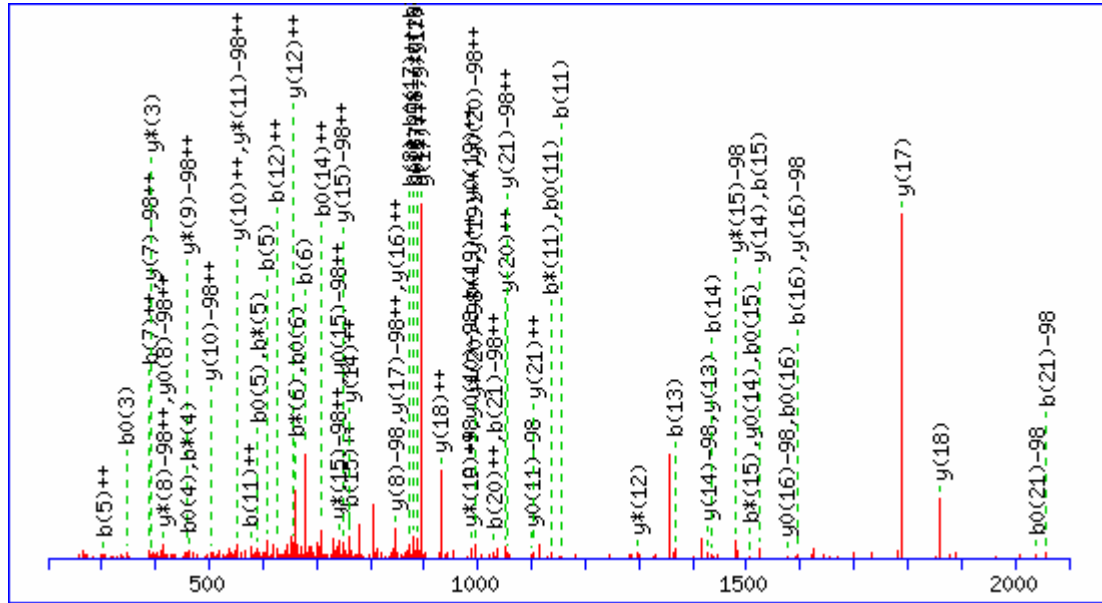

|                        |                                                               |                        |                                                               |                         |                                                               |                         |                                                 |           |                                                 |
|------------------------|---------------------------------------------------------------|------------------------|---------------------------------------------------------------|-------------------------|---------------------------------------------------------------|-------------------------|-------------------------------------------------|-----------|-------------------------------------------------|
| 88.0631 <sup>+2</sup>  | y <sub>1</sub> <sup>+2</sup>                                  | 607.2358               | b <sub>5</sub>                                                | 895.4353 <sup>+2</sup>  | y <sub>17</sub> <sup>+2</sup>                                 | 1216.6069               | y <sub>12</sub> -H <sub>3</sub> PO <sub>4</sub> | 1789.8633 | y <sub>17</sub>                                 |
| 156.5926 <sup>+2</sup> | y <sub>2</sub> <sup>+2</sup>                                  | 608.8071 <sup>+2</sup> | y <sub>12</sub> -H <sub>3</sub> PO <sub>4</sub> <sup>+2</sup> | 930.9538 <sup>+2</sup>  | y <sub>18</sub> <sup>+2</sup>                                 | 1217.531                | y <sub>11</sub>                                 | 1858.7895 | b <sub>18</sub>                                 |
| 175.119                | y <sub>1</sub>                                                | 609.2692 <sup>+2</sup> | y <sub>11</sub> <sup>+2</sup>                                 | 933.4901                | y <sub>9</sub> -H <sub>3</sub> PO <sub>4</sub>                | 1234.0681 <sup>+2</sup> | MH <sup>+2</sup>                                | 1860.9004 | y <sub>18</sub>                                 |
| 205.1190 <sup>+2</sup> | y <sub>3</sub> <sup>+2</sup>                                  | 609.3467               | y <sub>5</sub>                                                | 943.4156                | b <sub>9</sub>                                                | 1250.6052               | b <sub>12</sub>                                 | 1873.8967 | b <sub>19</sub> -H <sub>3</sub> PO <sub>4</sub> |
| 248.6350 <sup>+2</sup> | y <sub>4</sub> <sup>+2</sup>                                  | 657.7955 <sup>+2</sup> | y <sub>12</sub> <sup>+2</sup>                                 | 944.435                 | y <sub>8</sub>                                                | 1314.5838               | y <sub>12</sub>                                 | 1891.9661 | y <sub>19</sub> -H <sub>3</sub> PO <sub>4</sub> |
| 263.1026               | b <sub>2</sub>                                                | 665.3491 <sup>+2</sup> | y <sub>13</sub> -H <sub>3</sub> PO <sub>4</sub> <sup>+2</sup> | 946.4867 <sup>+2</sup>  | y <sub>19</sub> -H <sub>3</sub> PO <sub>4</sub> <sup>+2</sup> | 1329.691                | y <sub>13</sub> -H <sub>3</sub> PO <sub>4</sub> | 1960.9287 | b <sub>20</sub> -H <sub>3</sub> PO <sub>4</sub> |
| 305.1770 <sup>+2</sup> | y <sub>5</sub> <sup>+2</sup>                                  | 678.2729               | b <sub>6</sub>                                                | 995.4751 <sup>+2</sup>  | y <sub>19</sub> <sup>+2</sup>                                 | 1365.6321               | b <sub>13</sub>                                 | 1971.8736 | b <sub>19</sub>                                 |
| 312.1779               | y <sub>2</sub>                                                | 706.3995               | y <sub>6</sub>                                                | 1003.5081 <sup>+2</sup> | y <sub>20</sub> -H <sub>3</sub> PO <sub>4</sub> <sup>+2</sup> | 1426.7437               | y <sub>14</sub> -H <sub>3</sub> PO <sub>4</sub> | 1989.943  | y <sub>19</sub>                                 |
| 353.7034 <sup>+2</sup> | y <sub>6</sub> <sup>+2</sup>                                  | 713.8755 <sup>+2</sup> | y <sub>14</sub> -H <sub>3</sub> PO <sub>4</sub> <sup>+2</sup> | 1004.5272               | y <sub>10</sub> -H <sub>3</sub> PO <sub>4</sub>               | 1427.6679               | y <sub>13</sub>                                 | 2006.009  | y <sub>20</sub> -H <sub>3</sub> PO <sub>4</sub> |
| 364.1503               | b <sub>3</sub>                                                | 714.3376 <sup>+2</sup> | y <sub>13</sub> <sup>+2</sup>                                 | 1031.467                | y <sub>9</sub>                                                | 1436.6692               | b <sub>14</sub>                                 | 2057.9815 | b <sub>21</sub> -H <sub>3</sub> PO <sub>4</sub> |
| 388.2141 <sup>+2</sup> | y <sub>7</sub> -H <sub>3</sub> PO <sub>4</sub> <sup>+2</sup>  | 749.3941 <sup>+2</sup> | y <sub>15</sub> -H <sub>3</sub> PO <sub>4</sub> <sup>+2</sup> | 1040.4684               | b <sub>10</sub>                                               | 1497.7809               | y <sub>15</sub> -H <sub>3</sub> PO <sub>4</sub> | 2058.9056 | b <sub>20</sub>                                 |
| 409.2306               | y <sub>3</sub>                                                | 762.8640 <sup>+2</sup> | y <sub>14</sub> <sup>+2</sup>                                 | 1052.4966 <sup>+2</sup> | y <sub>20</sub> <sup>+2</sup>                                 | 1523.7013               | b <sub>15</sub>                                 | 2103.9859 | y <sub>20</sub>                                 |
| 423.7327 <sup>+2</sup> | y <sub>8</sub> -H <sub>3</sub> PO <sub>4</sub> <sup>+2</sup>  | 775.3257               | b <sub>7</sub>                                                | 1054.0320 <sup>+2</sup> | y <sub>21</sub> -H <sub>3</sub> PO <sub>4</sub> <sup>+2</sup> | 1524.7206               | y <sub>14</sub>                                 | 2107.0567 | y <sub>21</sub> -H <sub>3</sub> PO <sub>4</sub> |
| 437.2026 <sup>+2</sup> | y <sub>7</sub> <sup>+2</sup>                                  | 775.4209               | y <sub>7</sub> -H <sub>3</sub> PO <sub>4</sub>                | 1098.0238 <sup>+2</sup> | b <sub>22</sub> -H <sub>3</sub> PO <sub>4</sub> <sup>+2</sup> | 1594.7384               | b <sub>16</sub>                                 | 2155.9584 | b <sub>21</sub>                                 |
| 467.2487 <sup>+2</sup> | y <sub>9</sub> -H <sub>3</sub> PO <sub>4</sub> <sup>+2</sup>  | 797.9204 <sup>+2</sup> | y <sub>16</sub> -H <sub>3</sub> PO <sub>4</sub> <sup>+2</sup> | 1102.5041               | y <sub>10</sub>                                               | 1594.8336               | y <sub>16</sub> -H <sub>3</sub> PO <sub>4</sub> | 2195.0404 | b <sub>22</sub> -H <sub>3</sub> PO <sub>4</sub> |
| 472.7211 <sup>+2</sup> | y <sub>8</sub> <sup>+2</sup>                                  | 798.3825 <sup>+2</sup> | y <sub>15</sub> <sup>+2</sup>                                 | 1103.0204 <sup>+2</sup> | y <sub>21</sub> <sup>+2</sup>                                 | 1595.7577               | y <sub>15</sub>                                 | 2205.0336 | y <sub>21</sub>                                 |
| 478.1932               | b <sub>4</sub>                                                | 846.4468 <sup>+2</sup> | y <sub>17</sub> -H <sub>3</sub> PO <sub>4</sub> <sup>+2</sup> | 1119.5541               | y <sub>11</sub> -H <sub>3</sub> PO <sub>4</sub>               | 1663.7598               | b <sub>17</sub> -H <sub>3</sub> PO <sub>4</sub> | 2254.1251 | y <sub>22</sub> -H <sub>3</sub> PO <sub>4</sub> |
| 496.2627               | y <sub>4</sub>                                                | 846.4581               | y <sub>8</sub> -H <sub>3</sub> PO <sub>4</sub>                | 1127.5662 <sup>+2</sup> | y <sub>22</sub> -H <sub>3</sub> PO <sub>4</sub> <sup>+2</sup> | 1691.8864               | y <sub>17</sub> -H <sub>3</sub> PO <sub>4</sub> | 2293.0173 | b <sub>22</sub>                                 |
| 502.7672 <sup>+2</sup> | y <sub>10</sub> -H <sub>3</sub> PO <sub>4</sub> <sup>+2</sup> | 846.9089 <sup>+2</sup> | y <sub>16</sub> <sup>+2</sup>                                 | 1147.0123 <sup>+2</sup> | b <sub>22</sub> <sup>+2</sup>                                 | 1692.8105               | y <sub>16</sub>                                 | 2352.102  | y <sub>22</sub>                                 |
| 516.2371 <sup>+2</sup> | y <sub>9</sub> <sup>+2</sup>                                  | 872.3785               | b <sub>8</sub>                                                | 1153.5524               | b <sub>11</sub>                                               | 1760.8126               | b <sub>18</sub> -H <sub>3</sub> PO <sub>4</sub> | 2369.152  | MH-H <sub>3</sub> PO <sub>4</sub>               |
| 551.7557 <sup>+2</sup> | y <sub>10</sub> <sup>+2</sup>                                 | 873.3978               | y <sub>7</sub>                                                | 1176.5546 <sup>+2</sup> | y <sub>22</sub> <sup>+2</sup>                                 | 1761.7367               | b <sub>17</sub>                                 | 2467.1289 | MH                                              |
| 560.2807 <sup>+2</sup> | y <sub>11</sub> -H <sub>3</sub> PO <sub>4</sub> <sup>+2</sup> | 881.9654 <sup>+2</sup> | y <sub>18</sub> -H <sub>3</sub> PO <sub>4</sub> <sup>+2</sup> | 1185.0797 <sup>+2</sup> | MH-H <sub>3</sub> PO <sub>4</sub> <sup>+2</sup>               | 1762.9235               | y <sub>18</sub> -H <sub>3</sub> PO <sub>4</sub> |           |                                                 |

MS/MS Fragmentation of DFTNEAPPAPLPDASA(S)PL(S)PHRR  
 Found in IPI00295457, myosin phosphatase-Rho interacting protein isoform 1

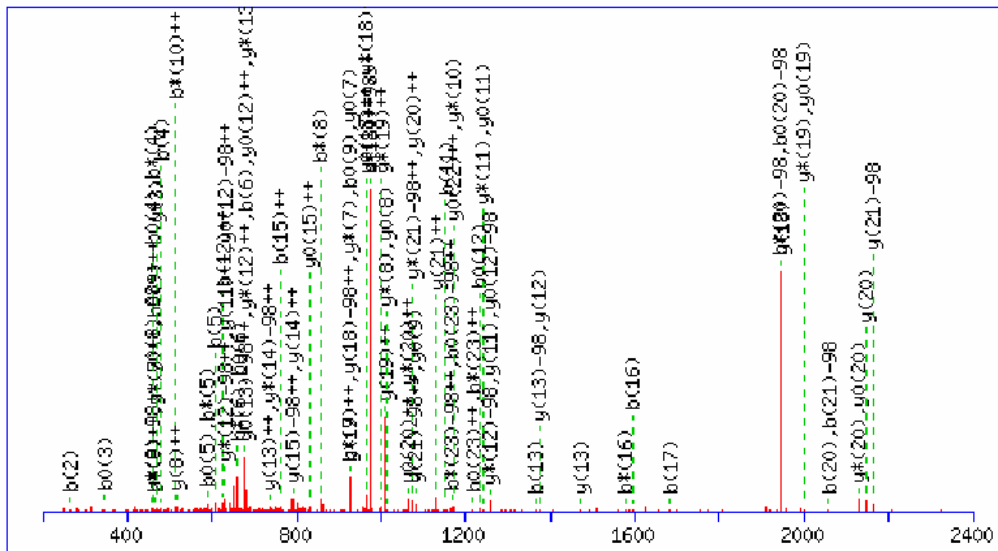

|                        |                                                               |                        |                                                               |                         |                                                               |                         |                                                 |           |                                                 |
|------------------------|---------------------------------------------------------------|------------------------|---------------------------------------------------------------|-------------------------|---------------------------------------------------------------|-------------------------|-------------------------------------------------|-----------|-------------------------------------------------|
| 88.0631 <sup>+2</sup>  | y <sub>1</sub> <sup>+2</sup>                                  | 607.2358               | b <sub>5</sub>                                                | 942.4669                | y <sub>7</sub>                                                | 1250.6052               | b <sub>12</sub>                                 | 1891.9072 | b <sub>19</sub>                                 |
| 166.1137 <sup>+2</sup> | y <sub>2</sub> <sup>+2</sup>                                  | 629.8062 <sup>+2</sup> | y <sub>11</sub> <sup>+2</sup>                                 | 943.4156                | b <sub>9</sub>                                                | 1254.6052 <sup>+2</sup> | y <sub>23</sub> <sup>+2</sup>                   | 1919.0246 | y <sub>19</sub> -H <sub>3</sub> PO <sub>4</sub> |
| 175.119                | y <sub>1</sub>                                                | 634.3532               | y <sub>5</sub> -H <sub>3</sub> PO <sub>4</sub>                | 960.0159 <sup>+2</sup>  | y <sub>19</sub> -H <sub>3</sub> PO <sub>4</sub> <sup>+2</sup> | 1258.6052               | y <sub>11</sub>                                 | 1945.9644 | y <sub>18</sub>                                 |
| 234.6431 <sup>+2</sup> | y <sub>3</sub> <sup>+2</sup>                                  | 638.3313 <sup>+2</sup> | y <sub>12</sub> -H <sub>3</sub> PO <sub>4</sub> <sup>+2</sup> | 973.4858 <sup>+2</sup>  | y <sub>18</sub> <sup>+2</sup>                                 | 1263.1302 <sup>+2</sup> | MH-H <sub>3</sub> PO <sub>4</sub> <sup>+2</sup> | 1960.9287 | b <sub>20</sub> -H <sub>3</sub> PO <sub>4</sub> |
| 263.1026               | b <sub>2</sub>                                                | 678.2729               | b <sub>6</sub>                                                | 1002.5592               | y <sub>9</sub> -H <sub>3</sub> PO <sub>4</sub>                | 1275.6553               | y <sub>12</sub> -H <sub>3</sub> PO <sub>4</sub> | 2017.0015 | y <sub>19</sub>                                 |
| 283.1695 <sup>+2</sup> | y <sub>4</sub> <sup>+2</sup>                                  | 686.8576 <sup>+2</sup> | y <sub>13</sub> -H <sub>3</sub> PO <sub>4</sub> <sup>+2</sup> | 1009.0044 <sup>+2</sup> | y <sub>19</sub> <sup>+2</sup>                                 | 1312.1187 <sup>+2</sup> | MH <sup>+2</sup>                                | 2048.0672 | y <sub>20</sub> -H <sub>3</sub> PO <sub>4</sub> |
| 317.6802 <sup>+2</sup> | y <sub>5</sub> -H <sub>3</sub> PO <sub>4</sub> <sup>+2</sup>  | 687.3197 <sup>+2</sup> | y <sub>12</sub> <sup>+2</sup>                                 | 1024.5372 <sup>+2</sup> | y <sub>20</sub> -H <sub>3</sub> PO <sub>4</sub> <sup>+2</sup> | 1365.6321               | b <sub>13</sub>                                 | 2057.9815 | b <sub>21</sub> -H <sub>3</sub> PO <sub>4</sub> |
| 331.2201               | y <sub>2</sub>                                                | 732.3301               | y <sub>5</sub>                                                | 1029.499                | y <sub>8</sub>                                                | 1372.708                | y <sub>13</sub> -H <sub>3</sub> PO <sub>4</sub> | 2058.9056 | b <sub>20</sub>                                 |
| 364.1503               | b <sub>3</sub>                                                | 735.8461 <sup>+2</sup> | y <sub>13</sub> <sup>+2</sup>                                 | 1040.4684               | b <sub>10</sub>                                               | 1373.6322               | y <sub>12</sub>                                 | 2146.0441 | y <sub>20</sub>                                 |
| 366.6687 <sup>+2</sup> | y <sub>5</sub> <sup>+2</sup>                                  | 743.3997 <sup>+2</sup> | y <sub>14</sub> -H <sub>3</sub> PO <sub>4</sub> <sup>+2</sup> | 1073.5257 <sup>+2</sup> | y <sub>20</sub> <sup>+2</sup>                                 | 1436.6692               | b <sub>14</sub>                                 | 2155.9584 | b <sub>21</sub>                                 |
| 374.2223 <sup>+2</sup> | y <sub>6</sub> -H <sub>3</sub> PO <sub>4</sub> <sup>+2</sup>  | 747.4373               | y <sub>6</sub> -H <sub>3</sub> PO <sub>4</sub>                | 1081.5587 <sup>+2</sup> | y <sub>21</sub> -H <sub>3</sub> PO <sub>4</sub> <sup>+2</sup> | 1470.6849               | y <sub>13</sub>                                 | 2162.1101 | y <sub>21</sub> -H <sub>3</sub> PO <sub>4</sub> |
| 422.7487 <sup>+2</sup> | y <sub>7</sub> -H <sub>3</sub> PO <sub>4</sub> <sup>+2</sup>  | 775.3257               | b <sub>7</sub>                                                | 1089.5912               | y <sub>10</sub> -H <sub>3</sub> PO <sub>4</sub>               | 1485.7921               | y <sub>14</sub> -H <sub>3</sub> PO <sub>4</sub> | 2195.0404 | b <sub>22</sub> -H <sub>3</sub> PO <sub>4</sub> |
| 423.2107 <sup>+2</sup> | y <sub>6</sub> <sup>+2</sup>                                  | 791.9261 <sup>+2</sup> | y <sub>15</sub> -H <sub>3</sub> PO <sub>4</sub> <sup>+2</sup> | 1098.0238 <sup>+2</sup> | b <sub>22</sub> -H <sub>3</sub> PO <sub>4</sub> <sup>+2</sup> | 1523.7013               | b <sub>15</sub>                                 | 2260.087  | y <sub>21</sub>                                 |
| 466.2647 <sup>+2</sup> | y <sub>8</sub> -H <sub>3</sub> PO <sub>4</sub> <sup>+2</sup>  | 792.3881 <sup>+2</sup> | y <sub>14</sub> <sup>+2</sup>                                 | 1100.5361               | y <sub>9</sub>                                                | 1582.8448               | y <sub>15</sub> -H <sub>3</sub> PO <sub>4</sub> | 2263.1578 | y <sub>22</sub> -H <sub>3</sub> PO <sub>4</sub> |
| 468.279                | y <sub>3</sub>                                                | 827.4446 <sup>+2</sup> | y <sub>16</sub> -H <sub>3</sub> PO <sub>4</sub> <sup>+2</sup> | 1130.5471 <sup>+2</sup> | y <sub>21</sub> <sup>+2</sup>                                 | 1583.769                | y <sub>14</sub>                                 | 2293.0173 | b <sub>22</sub>                                 |
| 471.7371 <sup>+2</sup> | y <sub>7</sub> <sup>+2</sup>                                  | 840.9145 <sup>+2</sup> | y <sub>15</sub> <sup>+2</sup>                                 | 1132.0825 <sup>+2</sup> | y <sub>22</sub> -H <sub>3</sub> PO <sub>4</sub> <sup>+2</sup> | 1594.7384               | b <sub>16</sub>                                 | 2351.1415 | b <sub>23</sub> -H <sub>3</sub> PO <sub>4</sub> |
| 478.1932               | b <sub>4</sub>                                                | 844.49                 | y <sub>7</sub> -H <sub>3</sub> PO <sub>4</sub>                | 1147.0123 <sup>+2</sup> | b <sub>22</sub> <sup>+2</sup>                                 | 1653.882                | y <sub>16</sub> -H <sub>3</sub> PO <sub>4</sub> | 2361.1347 | y <sub>22</sub>                                 |
| 501.7832 <sup>+2</sup> | y <sub>9</sub> -H <sub>3</sub> PO <sub>4</sub> <sup>+2</sup>  | 845.4142               | y <sub>6</sub>                                                | 1153.5524               | b <sub>11</sub>                                               | 1680.8217               | y <sub>15</sub>                                 | 2410.2262 | y <sub>23</sub> -H <sub>3</sub> PO <sub>4</sub> |
| 515.2531 <sup>+2</sup> | y <sub>8</sub> <sup>+2</sup>                                  | 872.3785               | b <sub>8</sub>                                                | 1160.6283               | y <sub>11</sub> -H <sub>3</sub> PO <sub>4</sub>               | 1681.7704               | b <sub>17</sub>                                 | 2449.1184 | b <sub>23</sub>                                 |
| 545.2992 <sup>+2</sup> | y <sub>10</sub> -H <sub>3</sub> PO <sub>4</sub> <sup>+2</sup> | 875.9710 <sup>+2</sup> | y <sub>17</sub> -H <sub>3</sub> PO <sub>4</sub> <sup>+2</sup> | 1176.0744 <sup>+2</sup> | b <sub>23</sub> -H <sub>3</sub> PO <sub>4</sub> <sup>+2</sup> | 1750.9347               | y <sub>17</sub> -H <sub>3</sub> PO <sub>4</sub> | 2508.2031 | y <sub>23</sub>                                 |
| 550.7717 <sup>+2</sup> | y <sub>9</sub> <sup>+2</sup>                                  | 876.4331 <sup>+2</sup> | y <sub>16</sub> <sup>+2</sup>                                 | 1181.0710 <sup>+2</sup> | y <sub>22</sub> <sup>+2</sup>                                 | 1751.8589               | y <sub>16</sub>                                 | 2525.2532 | MH-H <sub>3</sub> PO <sub>4</sub>               |
| 565.3317               | y <sub>4</sub>                                                | 924.4974 <sup>+2</sup> | y <sub>18</sub> -H <sub>3</sub> PO <sub>4</sub> <sup>+2</sup> | 1187.5681               | y <sub>10</sub>                                               | 1778.8232               | b <sub>18</sub>                                 | 2623.2301 | MH                                              |
| 580.8178 <sup>+2</sup> | y <sub>11</sub> -H <sub>3</sub> PO <sub>4</sub> <sup>+2</sup> | 924.9594 <sup>+2</sup> | y <sub>17</sub> <sup>+2</sup>                                 | 1205.6167 <sup>+2</sup> | y <sub>23</sub> -H <sub>3</sub> PO <sub>4</sub> <sup>+2</sup> | 1847.9875               | y <sub>18</sub> -H <sub>3</sub> PO <sub>4</sub> |           |                                                 |
| 594.2877 <sup>+2</sup> | y <sub>10</sub> <sup>+2</sup>                                 | 931.5221               | y <sub>8</sub> -H <sub>3</sub> PO <sub>4</sub>                | 1225.0628 <sup>+2</sup> | b <sub>23</sub> <sup>+2</sup>                                 | 1848.9116               | y <sub>17</sub>                                 |           |                                                 |

MS/MS Fragmentation of mEVDRsPGLPmSDLK  
 Found in IPI00295457, myosin phosphatase-Rho interacting protein isoform 1

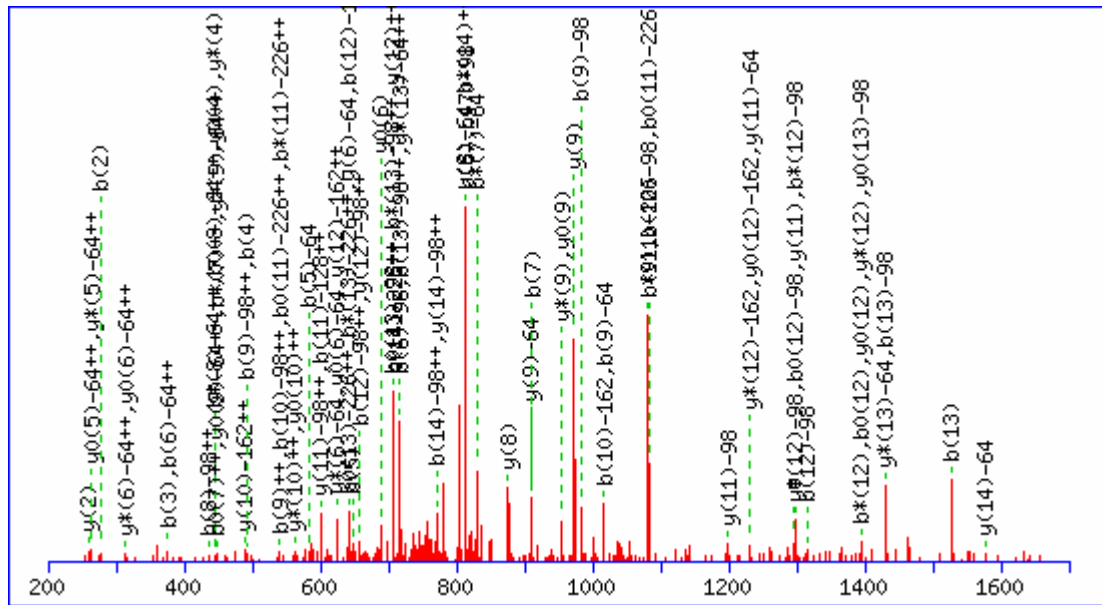

|                        |                                                              |                        |                                                               |                        |                                                               |                        |                                                 |           |                                                 |
|------------------------|--------------------------------------------------------------|------------------------|---------------------------------------------------------------|------------------------|---------------------------------------------------------------|------------------------|-------------------------------------------------|-----------|-------------------------------------------------|
| 74.0600 <sup>+2</sup>  | y <sub>1</sub> <sup>+2</sup>                                 | 438.7284 <sup>+2</sup> | y <sub>8</sub> <sup>+2</sup>                                  | 657.3295 <sup>+2</sup> | y <sub>12</sub> -H <sub>3</sub> PO <sub>4</sub> <sup>+2</sup> | 820.8384 <sup>+2</sup> | b <sub>14</sub> <sup>+2</sup>                   | 1313.6518 | y <sub>12</sub> -H <sub>3</sub> PO <sub>4</sub> |
| 130.6021 <sup>+2</sup> | y <sub>2</sub> <sup>+2</sup>                                 | 456.1701 <sup>+2</sup> | b <sub>7</sub> <sup>+2</sup>                                  | 657.7945 <sup>+2</sup> | b <sub>12</sub> -H <sub>3</sub> PO <sub>4</sub> <sup>+2</sup> | 844.9027 <sup>+2</sup> | MH-H <sub>3</sub> PO <sub>4</sub> <sup>+2</sup> | 1314.5817 | b <sub>12</sub> -H <sub>3</sub> PO <sub>4</sub> |
| 147.1128               | y <sub>1</sub>                                               | 462.2558               | y <sub>4</sub>                                                | 663.2669 <sup>+2</sup> | b <sub>11</sub> <sup>+2</sup>                                 | 870.3774               | b <sub>8</sub> -H <sub>3</sub> PO <sub>4</sub>  | 1325.5266 | b <sub>11</sub>                                 |
| 188.1155 <sup>+2</sup> | y <sub>3</sub> <sup>+2</sup>                                 | 484.6808 <sup>+2</sup> | b <sub>8</sub> <sup>+2</sup>                                  | 706.3180 <sup>+2</sup> | y <sub>12</sub> <sup>+2</sup>                                 | 876.4495               | y <sub>8</sub>                                  | 1411.6287 | y <sub>12</sub>                                 |
| 231.6316 <sup>+2</sup> | y <sub>4</sub> <sup>+2</sup>                                 | 487.2548 <sup>+2</sup> | y <sub>9</sub> <sup>+2</sup>                                  | 706.344                | y <sub>6</sub>                                                | 893.8912 <sup>+2</sup> | MH <sup>+2</sup>                                | 1412.5586 | b <sub>12</sub>                                 |
| 260.1969               | y <sub>2</sub>                                               | 491.1806               | b <sub>4</sub>                                                | 706.7829 <sup>+2</sup> | b <sub>12</sub> <sup>+2</sup>                                 | 911.3329               | b <sub>7</sub>                                  | 1412.7202 | y <sub>13</sub> -H <sub>3</sub> PO <sub>4</sub> |
| 277.0853               | b <sub>2</sub>                                               | 492.2344 <sup>+2</sup> | b <sub>9</sub> -H <sub>3</sub> PO <sub>4</sub> <sup>+2</sup>  | 706.8638 <sup>+2</sup> | y <sub>13</sub> -H <sub>3</sub> PO <sub>4</sub> <sup>+2</sup> | 968.3543               | b <sub>8</sub>                                  | 1429.6086 | b <sub>13</sub> -H <sub>3</sub> PO <sub>4</sub> |
| 305.1493 <sup>+2</sup> | y <sub>5</sub> <sup>+2</sup>                                 | 521.7655 <sup>+2</sup> | y <sub>10</sub> -H <sub>3</sub> PO <sub>4</sub> <sup>+2</sup> | 715.3080 <sup>+2</sup> | b <sub>13</sub> -H <sub>3</sub> PO <sub>4</sub> <sup>+2</sup> | 973.5023               | y <sub>9</sub>                                  | 1510.6971 | y <sub>13</sub>                                 |
| 324.1445 <sup>+2</sup> | b <sub>5</sub> <sup>+2</sup>                                 | 540.7608 <sup>+2</sup> | b <sub>10</sub> -H <sub>3</sub> PO <sub>4</sub> <sup>+2</sup> | 716.3032               | b <sub>6</sub> -H <sub>3</sub> PO <sub>4</sub>                | 983.4615               | b <sub>9</sub> -H <sub>3</sub> PO <sub>4</sub>  | 1527.5855 | b <sub>13</sub>                                 |
| 353.6756 <sup>+2</sup> | y <sub>6</sub> <sup>+2</sup>                                 | 541.2228 <sup>+2</sup> | b <sub>9</sub> <sup>+2</sup>                                  | 755.8522 <sup>+2</sup> | y <sub>13</sub> <sup>+2</sup>                                 | 1042.5238              | y <sub>10</sub> -H <sub>3</sub> PO <sub>4</sub> | 1541.7628 | y <sub>14</sub> -H <sub>3</sub> PO <sub>4</sub> |
| 358.6552 <sup>+2</sup> | b <sub>6</sub> -H <sub>3</sub> PO <sub>4</sub> <sup>+2</sup> | 570.7540 <sup>+2</sup> | y <sub>10</sub> <sup>+2</sup>                                 | 764.2964 <sup>+2</sup> | b <sub>13</sub> <sup>+2</sup>                                 | 1080.5143              | b <sub>10</sub> -H <sub>3</sub> PO <sub>4</sub> | 1542.6927 | b <sub>14</sub> -H <sub>3</sub> PO <sub>4</sub> |
| 375.2238               | y <sub>3</sub>                                               | 589.7492 <sup>+2</sup> | b <sub>10</sub> <sup>+2</sup>                                 | 771.3850 <sup>+2</sup> | y <sub>14</sub> -H <sub>3</sub> PO <sub>4</sub> <sup>+2</sup> | 1081.4384              | b <sub>9</sub>                                  | 1639.7397 | y <sub>14</sub>                                 |
| 376.1537               | b <sub>3</sub>                                               | 599.8161 <sup>+2</sup> | y <sub>11</sub> -H <sub>3</sub> PO <sub>4</sub> <sup>+2</sup> | 771.8500 <sup>+2</sup> | b <sub>14</sub> -H <sub>3</sub> PO <sub>4</sub> <sup>+2</sup> | 1140.5007              | y <sub>10</sub>                                 | 1640.6696 | b <sub>14</sub>                                 |
| 407.1816 <sup>+2</sup> | b <sub>7</sub> -H <sub>3</sub> PO <sub>4</sub> <sup>+2</sup> | 609.2912               | y <sub>5</sub>                                                | 813.356                | b <sub>7</sub> -H <sub>3</sub> PO <sub>4</sub>                | 1178.4912              | b <sub>10</sub>                                 | 1688.7982 | MH-H <sub>3</sub> PO <sub>4</sub>               |
| 407.6437 <sup>+2</sup> | b <sub>6</sub> <sup>+2</sup>                                 | 614.2785 <sup>+2</sup> | b <sub>11</sub> -H <sub>3</sub> PO <sub>4</sub> <sup>+2</sup> | 814.2801               | b <sub>6</sub>                                                | 1198.6249              | y <sub>11</sub> -H <sub>3</sub> PO <sub>4</sub> | 1786.7751 | MH                                              |
| 410.2177 <sup>+2</sup> | y <sub>7</sub> <sup>+2</sup>                                 | 647.2817               | b <sub>5</sub>                                                | 819.4281               | y <sub>7</sub>                                                | 1227.5497              | b <sub>11</sub> -H <sub>3</sub> PO <sub>4</sub> |           |                                                 |
| 435.6924 <sup>+2</sup> | b <sub>8</sub> -H <sub>3</sub> PO <sub>4</sub> <sup>+2</sup> | 648.8045 <sup>+2</sup> | y <sub>11</sub> <sup>+2</sup>                                 | 820.3735 <sup>+2</sup> | y <sub>14</sub> <sup>+2</sup>                                 | 1296.6018              | y <sub>11</sub>                                 |           |                                                 |

MS/MS Fragmentation of YQtQPVTLGEVEQVQSGK  
 Found in IPI00018370, Isoform 2 of Supervillin

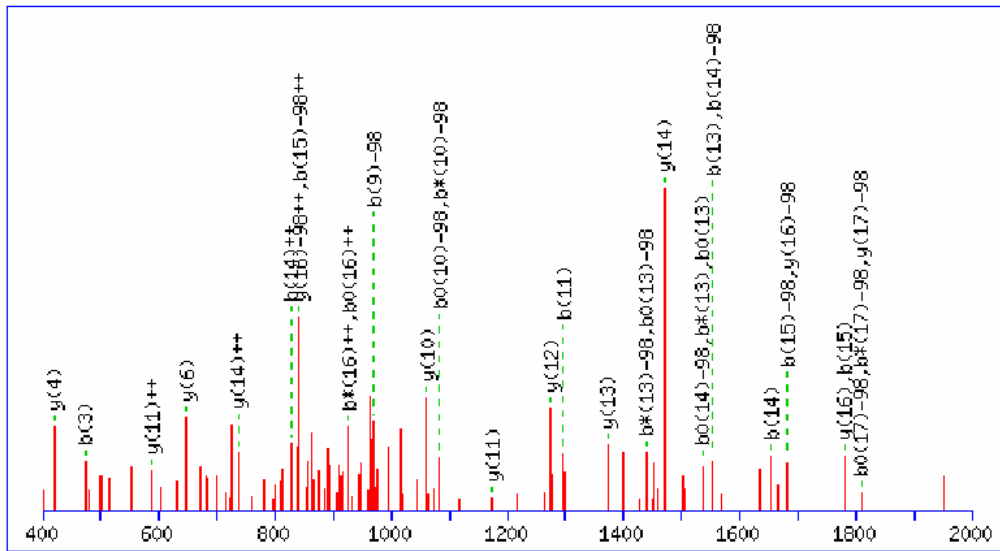

|                        |                                                |                        |                                                |                         |                                                               |           |                                                 |           |                                                 |
|------------------------|------------------------------------------------|------------------------|------------------------------------------------|-------------------------|---------------------------------------------------------------|-----------|-------------------------------------------------|-----------|-------------------------------------------------|
| 74.0600 <sup>+2</sup>  | y <sub>1</sub> <sup>+2</sup>                   | 502.2564 <sup>+2</sup> | y <sub>9</sub> <sup>+2</sup>                   | 799.9229 <sup>+2</sup>  | y <sub>15</sub> <sup>+2</sup>                                 | 1068.4762 | b <sub>9</sub>                                  | 1652.7567 | b <sub>14</sub>                                 |
| 102.5708 <sup>+2</sup> | y <sub>2</sub> <sup>+2</sup>                   | 503.2249               | b <sub>4</sub> -H <sub>3</sub> PO <sub>4</sub> | 800.3937                | b <sub>7</sub> -H <sub>3</sub> PO <sub>4</sub>                | 1099.5419 | b <sub>10</sub> -H <sub>3</sub> PO <sub>4</sub> | 1681.8755 | y <sub>16</sub> -H <sub>3</sub> PO <sub>4</sub> |
| 146.0868 <sup>+2</sup> | y <sub>3</sub> <sup>+2</sup>                   | 518.2933               | y <sub>5</sub>                                 | 841.4414 <sup>+2</sup>  | y <sub>16</sub> -H <sub>3</sub> PO <sub>4</sub> <sup>+2</sup> | 1173.611  | y <sub>11</sub>                                 | 1682.8384 | b <sub>15</sub> -H <sub>3</sub> PO <sub>4</sub> |
| 147.1128               | y <sub>1</sub>                                 | 530.7671 <sup>+2</sup> | y <sub>10</sub> <sup>+2</sup>                  | 874.4629                | y <sub>8</sub>                                                | 1197.5187 | b <sub>10</sub>                                 | 1769.8705 | b <sub>16</sub> -H <sub>3</sub> PO <sub>4</sub> |
| 204.1343               | y <sub>2</sub>                                 | 587.3091 <sup>+2</sup> | y <sub>11</sub> <sup>+2</sup>                  | 890.4299 <sup>+2</sup>  | y <sub>16</sub> <sup>+2</sup>                                 | 1198.6103 | b <sub>11</sub> -H <sub>3</sub> PO <sub>4</sub> | 1779.8524 | y <sub>16</sub>                                 |
| 210.1161 <sup>+2</sup> | y <sub>4</sub> <sup>+2</sup>                   | 600.2776               | b <sub>5</sub> -H <sub>3</sub> PO <sub>4</sub> | 898.3706                | b <sub>7</sub>                                                | 1274.6587 | y <sub>12</sub>                                 | 1780.8153 | b <sub>15</sub>                                 |
| 259.6503 <sup>+2</sup> | y <sub>5</sub> <sup>+2</sup>                   | 601.2018               | b <sub>4</sub>                                 | 905.4707 <sup>+2</sup>  | y <sub>17</sub> -H <sub>3</sub> PO <sub>4</sub> <sup>+2</sup> | 1296.5872 | b <sub>11</sub>                                 | 1809.9341 | y <sub>17</sub> -H <sub>3</sub> PO <sub>4</sub> |
| 291.1663               | y <sub>3</sub>                                 | 637.8330 <sup>+2</sup> | y <sub>12</sub> <sup>+2</sup>                  | 913.4778                | b <sub>8</sub> -H <sub>3</sub> PO <sub>4</sub>                | 1327.6529 | b <sub>12</sub> -H <sub>3</sub> PO <sub>4</sub> | 1826.8919 | b <sub>17</sub> -H <sub>3</sub> PO <sub>4</sub> |
| 292.1292               | b <sub>2</sub>                                 | 646.3519               | y <sub>6</sub>                                 | 954.4591 <sup>+2</sup>  | y <sub>17</sub> <sup>+2</sup>                                 | 1373.7271 | y <sub>13</sub>                                 | 1867.8474 | b <sub>16</sub>                                 |
| 323.6796 <sup>+2</sup> | y <sub>6</sub> <sup>+2</sup>                   | 687.3672 <sup>+2</sup> | y <sub>13</sub> <sup>+2</sup>                  | 970.4993                | b <sub>9</sub> -H <sub>3</sub> PO <sub>4</sub>                | 1425.6298 | b <sub>12</sub>                                 | 1907.911  | y <sub>17</sub>                                 |
| 375.1663               | b <sub>3</sub> -H <sub>3</sub> PO <sub>4</sub> | 698.2545               | b <sub>5</sub>                                 | 987.0024 <sup>+2</sup>  | MH-H <sub>3</sub> PO <sub>4</sub> <sup>+2</sup>               | 1455.7114 | b <sub>13</sub> -H <sub>3</sub> PO <sub>4</sub> | 1924.8688 | b <sub>17</sub>                                 |
| 388.2009 <sup>+2</sup> | y <sub>7</sub> <sup>+2</sup>                   | 699.3461               | b <sub>6</sub> -H <sub>3</sub> PO <sub>4</sub> | 1003.5055               | y <sub>9</sub>                                                | 1470.7798 | y <sub>14</sub>                                 | 1972.9974 | MH-H <sub>3</sub> PO <sub>4</sub>               |
| 419.2249               | y <sub>4</sub>                                 | 735.8936 <sup>+2</sup> | y <sub>14</sub> <sup>+2</sup>                  | 1011.4547               | b <sub>8</sub>                                                | 1553.6883 | b <sub>13</sub>                                 | 2070.9743 | MH                                              |
| 437.7351 <sup>+2</sup> | y <sub>8</sub> <sup>+2</sup>                   | 775.3945               | y <sub>7</sub>                                 | 1035.9908 <sup>+2</sup> | MH <sup>+2</sup>                                              | 1554.7798 | b <sub>14</sub> -H <sub>3</sub> PO <sub>4</sub> |           |                                                 |
| 473.1432               | b <sub>3</sub>                                 | 797.3229               | b <sub>6</sub>                                 | 1060.5269               | y <sub>10</sub>                                               | 1598.8384 | y <sub>15</sub>                                 |           |                                                 |

MS/MS Fragmentation of AAHTEDINACTLTTsPR  
 Found in IPI00021786, RAF proto-oncogene serine/threonine-protein kinase

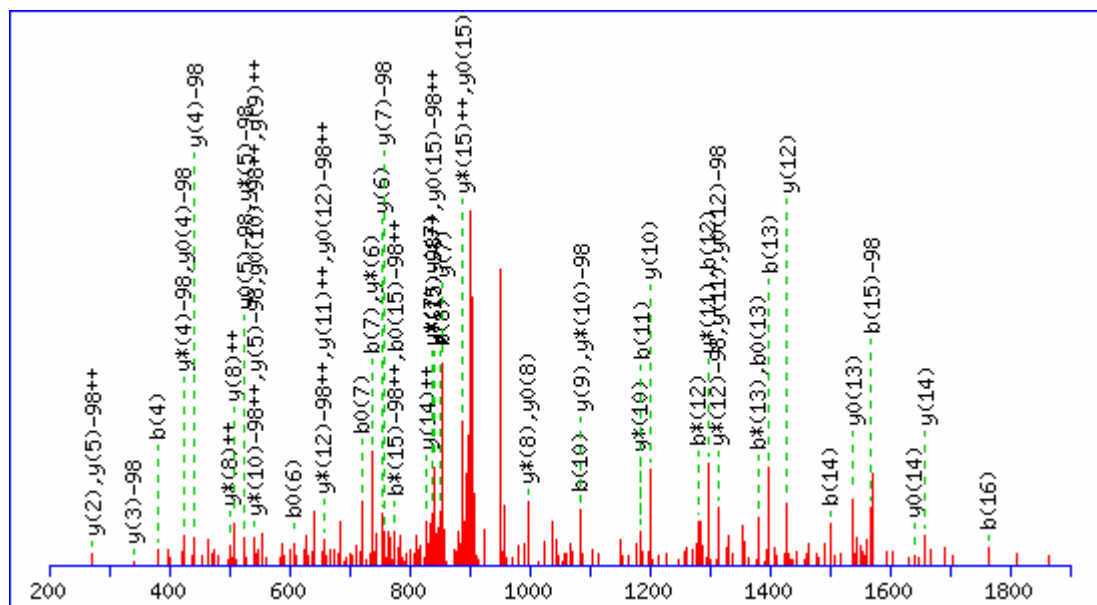

|                        |                                                              |                        |                                                               |                        |                                                               |                        |                                                               |           |                                                 |
|------------------------|--------------------------------------------------------------|------------------------|---------------------------------------------------------------|------------------------|---------------------------------------------------------------|------------------------|---------------------------------------------------------------|-----------|-------------------------------------------------|
| 88.0631 <sup>+2</sup>  | y <sub>1</sub> <sup>+2</sup>                                 | 379.2138 <sup>+2</sup> | y <sub>7</sub> -H <sub>3</sub> PO <sub>4</sub> <sup>+2</sup>  | 625.2576               | b <sub>6</sub>                                                | 853.8582 <sup>+2</sup> | b <sub>16</sub> <sup>+2</sup>                                 | 1341.6103 | b <sub>13</sub>                                 |
| 136.5895 <sup>+2</sup> | y <sub>2</sub> <sup>+2</sup>                                 | 381.1881               | b <sub>4</sub>                                                | 628.7889 <sup>+2</sup> | y <sub>11</sub> <sup>+2</sup>                                 | 855.3972               | y <sub>7</sub>                                                | 1371.5974 | y <sub>12</sub>                                 |
| 140.5738 <sup>+2</sup> | b <sub>3</sub> <sup>+2</sup>                                 | 426.6959 <sup>+2</sup> | b <sub>8</sub> <sup>+2</sup>                                  | 637.3139 <sup>+2</sup> | y <sub>12</sub> -H <sub>3</sub> PO <sub>4</sub> <sup>+2</sup> | 856.4070 <sup>+2</sup> | y <sub>16</sub> -H <sub>3</sub> PO <sub>4</sub> <sup>+2</sup> | 1402.6631 | y <sub>13</sub> -H <sub>3</sub> PO <sub>4</sub> |
| 143.0815               | b <sub>2</sub>                                               | 428.2022 <sup>+2</sup> | y <sub>7</sub> <sup>+2</sup>                                  | 641.2654               | y <sub>5</sub>                                                | 860.4295               | y <sub>8</sub> -H <sub>3</sub> PO <sub>4</sub>                | 1442.658  | b <sub>14</sub>                                 |
| 171.1002 <sup>+2</sup> | y <sub>3</sub> -H <sub>3</sub> PO <sub>4</sub> <sup>+2</sup> | 430.7184 <sup>+2</sup> | y <sub>8</sub> -H <sub>3</sub> PO <sub>4</sub> <sup>+2</sup>  | 656.3726               | y <sub>6</sub> -H <sub>3</sub> PO <sub>4</sub>                | 869.8769 <sup>+2</sup> | y <sub>15</sub> <sup>+2</sup>                                 | 1500.64   | y <sub>13</sub>                                 |
| 175.119                | y <sub>1</sub>                                               | 439.1701               | y <sub>3</sub>                                                | 671.3088 <sup>+2</sup> | b <sub>13</sub> <sup>+2</sup>                                 | 891.9256 <sup>+2</sup> | MH-H <sub>3</sub> PO <sub>4</sub> <sup>+2</sup>               | 1503.7108 | y <sub>14</sub> -H <sub>3</sub> PO <sub>4</sub> |
| 191.0977 <sup>+2</sup> | b <sub>4</sub> <sup>+2</sup>                                 | 442.2409               | y <sub>4</sub> -H <sub>3</sub> PO <sub>4</sub>                | 686.3023 <sup>+2</sup> | y <sub>12</sub> <sup>+2</sup>                                 | 905.3955 <sup>+2</sup> | y <sub>16</sub> <sup>+2</sup>                                 | 1511.6795 | b <sub>15</sub> -H <sub>3</sub> PO <sub>4</sub> |
| 220.0887 <sup>+2</sup> | y <sub>3</sub> <sup>+2</sup>                                 | 462.2145 <sup>+2</sup> | b <sub>9</sub> <sup>+2</sup>                                  | 701.8352 <sup>+2</sup> | y <sub>13</sub> -H <sub>3</sub> PO <sub>4</sub> <sup>+2</sup> | 923.4217               | b <sub>9</sub>                                                | 1601.6877 | y <sub>14</sub>                                 |
| 221.6241 <sup>+2</sup> | y <sub>4</sub> -H <sub>3</sub> PO <sub>4</sub> <sup>+2</sup> | 466.2369 <sup>+2</sup> | y <sub>9</sub> -H <sub>3</sub> PO <sub>4</sub> <sup>+2</sup>  | 721.8326 <sup>+2</sup> | b <sub>14</sub> <sup>+2</sup>                                 | 931.4666               | y <sub>9</sub> -H <sub>3</sub> PO <sub>4</sub>                | 1608.7322 | b <sub>16</sub> -H <sub>3</sub> PO <sub>4</sub> |
| 255.6190 <sup>+2</sup> | b <sub>5</sub> <sup>+2</sup>                                 | 479.7068 <sup>+2</sup> | y <sub>8</sub> <sup>+2</sup>                                  | 738.3417               | b <sub>7</sub>                                                | 940.9140 <sup>+2</sup> | MH <sup>+2</sup>                                              | 1609.6564 | b <sub>15</sub>                                 |
| 270.6125 <sup>+2</sup> | y <sub>4</sub> <sup>+2</sup>                                 | 510.2307               | b <sub>5</sub>                                                | 750.8236 <sup>+2</sup> | y <sub>13</sub> <sup>+2</sup>                                 | 958.4064               | y <sub>8</sub>                                                | 1640.7697 | y <sub>15</sub> -H <sub>3</sub> PO <sub>4</sub> |
| 272.1479 <sup>+2</sup> | y <sub>5</sub> -H <sub>3</sub> PO <sub>4</sub> <sup>+2</sup> | 513.7191 <sup>+2</sup> | b <sub>10</sub> <sup>+2</sup>                                 | 752.3590 <sup>+2</sup> | y <sub>14</sub> -H <sub>3</sub> PO <sub>4</sub> <sup>+2</sup> | 1026.4309              | b <sub>10</sub>                                               | 1706.7091 | b <sub>16</sub>                                 |
| 272.1717               | y <sub>2</sub>                                               | 515.2254 <sup>+2</sup> | y <sub>9</sub> <sup>+2</sup>                                  | 754.3495               | y <sub>6</sub>                                                | 1029.4435              | y <sub>9</sub>                                                | 1711.8068 | y <sub>16</sub> -H <sub>3</sub> PO <sub>4</sub> |
| 280.1404               | b <sub>3</sub>                                               | 523.2584 <sup>+2</sup> | y <sub>10</sub> -H <sub>3</sub> PO <sub>4</sub> <sup>+2</sup> | 756.3434 <sup>+2</sup> | b <sub>15</sub> -H <sub>3</sub> PO <sub>4</sub> <sup>+2</sup> | 1045.5095              | y <sub>10</sub> -H <sub>3</sub> PO <sub>4</sub>               | 1738.7466 | y <sub>15</sub>                                 |
| 313.1325 <sup>+2</sup> | b <sub>6</sub> <sup>+2</sup>                                 | 540.2178               | y <sub>4</sub>                                                | 757.4203               | y <sub>7</sub> -H <sub>3</sub> PO <sub>4</sub>                | 1127.4786              | b <sub>11</sub>                                               | 1782.8439 | MH-H <sub>3</sub> PO <sub>4</sub>               |
| 321.1364 <sup>+2</sup> | y <sub>5</sub> <sup>+2</sup>                                 | 543.2885               | y <sub>5</sub> -H <sub>3</sub> PO <sub>4</sub>                | 801.3475 <sup>+2</sup> | y <sub>14</sub> <sup>+2</sup>                                 | 1143.4864              | y <sub>10</sub>                                               | 1809.7837 | y <sub>16</sub>                                 |
| 328.6899 <sup>+2</sup> | y <sub>6</sub> -H <sub>3</sub> PO <sub>4</sub> <sup>+2</sup> | 564.2429 <sup>+2</sup> | b <sub>11</sub> <sup>+2</sup>                                 | 804.8698 <sup>+2</sup> | b <sub>16</sub> -H <sub>3</sub> PO <sub>4</sub> <sup>+2</sup> | 1158.5936              | y <sub>11</sub> -H <sub>3</sub> PO <sub>4</sub>               | 1880.8208 | MH                                              |
| 341.1932               | y <sub>3</sub> -H <sub>3</sub> PO <sub>4</sub>               | 572.2468 <sup>+2</sup> | y <sub>10</sub> <sup>+2</sup>                                 | 805.3318 <sup>+2</sup> | b <sub>15</sub> <sup>+2</sup>                                 | 1240.5627              | b <sub>12</sub>                                               |           |                                                 |
| 369.6745 <sup>+2</sup> | b <sub>7</sub> <sup>+2</sup>                                 | 579.8004 <sup>+2</sup> | y <sub>11</sub> -H <sub>3</sub> PO <sub>4</sub> <sup>+2</sup> | 820.8885 <sup>+2</sup> | y <sub>15</sub> -H <sub>3</sub> PO <sub>4</sub> <sup>+2</sup> | 1256.5705              | y <sub>11</sub>                                               |           |                                                 |
| 377.6784 <sup>+2</sup> | y <sub>6</sub> <sup>+2</sup>                                 | 620.7850 <sup>+2</sup> | b <sub>12</sub> <sup>+2</sup>                                 | 852.3846               | b <sub>8</sub>                                                | 1273.6205              | y <sub>12</sub> -H <sub>3</sub> PO <sub>4</sub>               |           |                                                 |

MS/MS Fragmentation of STsTPNVHmVSTTLPVDSR  
 Found in IPI00021786, RAF proto-oncogene serine/threonine-protein kinase

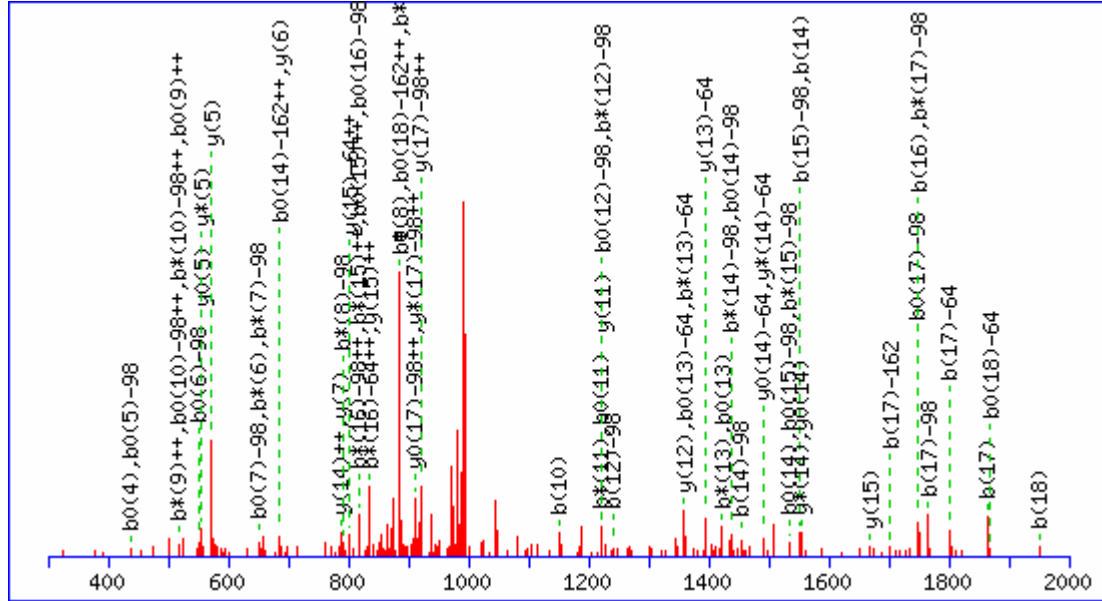

|                        |                                                              |                        |                                                               |                        |                                                               |                         |                                                               |           |                                                 |
|------------------------|--------------------------------------------------------------|------------------------|---------------------------------------------------------------|------------------------|---------------------------------------------------------------|-------------------------|---------------------------------------------------------------|-----------|-------------------------------------------------|
| 88.0631 <sup>+2</sup>  | y <sub>1</sub> <sup>+2</sup>                                 | 477.2109 <sup>+2</sup> | b <sub>9</sub> -H <sub>3</sub> PO <sub>4</sub> <sup>+2</sup>  | 727.8508 <sup>+2</sup> | b <sub>14</sub> -H <sub>3</sub> PO <sub>4</sub> <sup>+2</sup> | 968.9453 <sup>+2</sup>  | y <sub>17</sub> <sup>+2</sup>                                 | 1457.7417 | y <sub>13</sub>                                 |
| 131.5791 <sup>+2</sup> | y <sub>2</sub> <sup>+2</sup>                                 | 488.2589 <sup>+2</sup> | y <sub>9</sub> <sup>+2</sup>                                  | 729.3745 <sup>+2</sup> | y <sub>13</sub> <sup>+2</sup>                                 | 970.4807 <sup>+2</sup>  | y <sub>18</sub> -H <sub>3</sub> PO <sub>4</sub> <sup>+2</sup> | 1551.7472 | b <sub>15</sub> -H <sub>3</sub> PO <sub>4</sub> |
| 175.119                | y <sub>1</sub>                                               | 526.1994 <sup>+2</sup> | b <sub>9</sub> <sup>+2</sup>                                  | 767.2971               | b <sub>7</sub>                                                | 975.5106                | y <sub>9</sub>                                                | 1552.6713 | b <sub>14</sub>                                 |
| 189.087                | b <sub>2</sub>                                               | 526.7451 <sup>+2</sup> | b <sub>10</sub> -H <sub>3</sub> PO <sub>4</sub> <sup>+2</sup> | 776.3772 <sup>+2</sup> | b <sub>15</sub> -H <sub>3</sub> PO <sub>4</sub> <sup>+2</sup> | 975.9294 <sup>+2</sup>  | b <sub>18</sub> <sup>+2</sup>                                 | 1571.7846 | y <sub>14</sub>                                 |
| 189.0926 <sup>+2</sup> | y <sub>3</sub> <sup>+2</sup>                                 | 537.7931 <sup>+2</sup> | y <sub>10</sub> <sup>+2</sup>                                 | 776.8393 <sup>+2</sup> | b <sub>14</sub> <sup>+2</sup>                                 | 1013.9968 <sup>+2</sup> | MH-H <sub>3</sub> PO <sub>4</sub> <sup>+2</sup>               | 1649.7241 | b <sub>15</sub>                                 |
| 238.6268 <sup>+2</sup> | y <sub>4</sub> <sup>+2</sup>                                 | 554.1858               | b <sub>5</sub>                                                | 786.3959 <sup>+2</sup> | y <sub>14</sub> <sup>+2</sup>                                 | 1019.4692 <sup>+2</sup> | y <sub>18</sub> <sup>+2</sup>                                 | 1650.8156 | b <sub>16</sub> -H <sub>3</sub> PO <sub>4</sub> |
| 258.1084               | b <sub>3</sub> -H <sub>3</sub> PO <sub>4</sub>               | 570.2518               | b <sub>6</sub> -H <sub>3</sub> PO <sub>4</sub>                | 787.4308               | y <sub>7</sub>                                                | 1051.3914               | b <sub>9</sub>                                                | 1668.8374 | y <sub>15</sub>                                 |
| 262.151                | y <sub>2</sub>                                               | 570.2611 <sup>+2</sup> | b <sub>11</sub> -H <sub>3</sub> PO <sub>4</sub> <sup>+2</sup> | 806.3791               | b <sub>8</sub> -H <sub>3</sub> PO <sub>4</sub>                | 1052.483                | b <sub>10</sub> -H <sub>3</sub> PO <sub>4</sub>               | 1748.7925 | b <sub>16</sub>                                 |
| 287.1532 <sup>+2</sup> | y <sub>5</sub> <sup>+2</sup>                                 | 573.2991               | y <sub>5</sub>                                                | 825.3657 <sup>+2</sup> | b <sub>15</sub> <sup>+2</sup>                                 | 1062.9852 <sup>+2</sup> | MH <sup>+2</sup>                                              | 1765.8425 | b <sub>17</sub> -H <sub>3</sub> PO <sub>4</sub> |
| 343.6952 <sup>+2</sup> | y <sub>6</sub> <sup>+2</sup>                                 | 575.7336 <sup>+2</sup> | b <sub>10</sub> <sup>+2</sup>                                 | 825.9114 <sup>+2</sup> | b <sub>16</sub> -H <sub>3</sub> PO <sub>4</sub> <sup>+2</sup> | 1074.579                | y <sub>10</sub>                                               | 1769.8851 | y <sub>16</sub>                                 |
| 356.0853               | b <sub>3</sub>                                               | 611.3108 <sup>+2</sup> | y <sub>11</sub> <sup>+2</sup>                                 | 834.9223 <sup>+2</sup> | y <sub>15</sub> <sup>+2</sup>                                 | 1139.515                | b <sub>11</sub> -H <sub>3</sub> PO <sub>4</sub>               | 1838.9065 | y <sub>17</sub> -H <sub>3</sub> PO <sub>4</sub> |
| 359.1561               | b <sub>4</sub> -H <sub>3</sub> PO <sub>4</sub>               | 619.2496 <sup>+2</sup> | b <sub>11</sub> <sup>+2</sup>                                 | 874.8999 <sup>+2</sup> | b <sub>16</sub> <sup>+2</sup>                                 | 1150.4599               | b <sub>10</sub>                                               | 1852.8746 | b <sub>18</sub> -H <sub>3</sub> PO <sub>4</sub> |
| 377.1779               | y <sub>3</sub>                                               | 620.7850 <sup>+2</sup> | b <sub>12</sub> -H <sub>3</sub> PO <sub>4</sub> <sup>+2</sup> | 883.4249 <sup>+2</sup> | b <sub>17</sub> -H <sub>3</sub> PO <sub>4</sub> <sup>+2</sup> | 1221.6144               | y <sub>11</sub>                                               | 1863.8194 | b <sub>17</sub>                                 |
| 394.2191 <sup>+2</sup> | y <sub>7</sub> <sup>+2</sup>                                 | 668.2287               | b <sub>6</sub>                                                | 885.4462 <sup>+2</sup> | y <sub>16</sub> <sup>+2</sup>                                 | 1237.4919               | b <sub>11</sub>                                               | 1936.8834 | y <sub>17</sub>                                 |
| 403.6932 <sup>+2</sup> | b <sub>8</sub> -H <sub>3</sub> PO <sub>4</sub> <sup>+2</sup> | 669.3202               | b <sub>7</sub> -H <sub>3</sub> PO <sub>4</sub>                | 888.4785               | y <sub>8</sub>                                                | 1240.5627               | b <sub>12</sub> -H <sub>3</sub> PO <sub>4</sub>               | 1939.9542 | y <sub>18</sub> -H <sub>3</sub> PO <sub>4</sub> |
| 444.7429 <sup>+2</sup> | y <sub>8</sub> <sup>+2</sup>                                 | 669.7734 <sup>+2</sup> | b <sub>12</sub> <sup>+2</sup>                                 | 904.356                | b <sub>8</sub>                                                | 1338.5396               | b <sub>12</sub>                                               | 1950.8514 | b <sub>18</sub>                                 |
| 452.6817 <sup>+2</sup> | b <sub>8</sub> <sup>+2</sup>                                 | 671.3088 <sup>+2</sup> | b <sub>13</sub> -H <sub>3</sub> PO <sub>4</sub> <sup>+2</sup> | 919.9569 <sup>+2</sup> | y <sub>17</sub> -H <sub>3</sub> PO <sub>4</sub> <sup>+2</sup> | 1341.6103               | b <sub>13</sub> -H <sub>3</sub> PO <sub>4</sub>               | 2026.9862 | MH-H <sub>3</sub> PO <sub>4</sub>               |
| 456.2089               | b <sub>5</sub> -H <sub>3</sub> PO <sub>4</sub>               | 679.8403 <sup>+2</sup> | y <sub>12</sub> <sup>+2</sup>                                 | 926.9409 <sup>+2</sup> | b <sub>18</sub> -H <sub>3</sub> PO <sub>4</sub> <sup>+2</sup> | 1358.6733               | y <sub>12</sub>                                               | 2037.9311 | y <sub>18</sub>                                 |
| 457.133                | b <sub>4</sub>                                               | 686.3832               | y <sub>6</sub>                                                | 932.4133 <sup>+2</sup> | b <sub>17</sub> <sup>+2</sup>                                 | 1439.5872               | b <sub>13</sub>                                               | 2124.9631 | MH                                              |
| 476.2463               | y <sub>4</sub>                                               | 720.2973 <sup>+2</sup> | b <sub>13</sub> <sup>+2</sup>                                 | 953.4145               | b <sub>9</sub> -H <sub>3</sub> PO <sub>4</sub>                | 1454.6944               | b <sub>14</sub> -H <sub>3</sub> PO <sub>4</sub>               |           |                                                 |





MS/MS Fragmentation of RSsFSEGQTLTVTSGAK  
 Found in IPI00060439, KIAA0226 protein (Fragment)

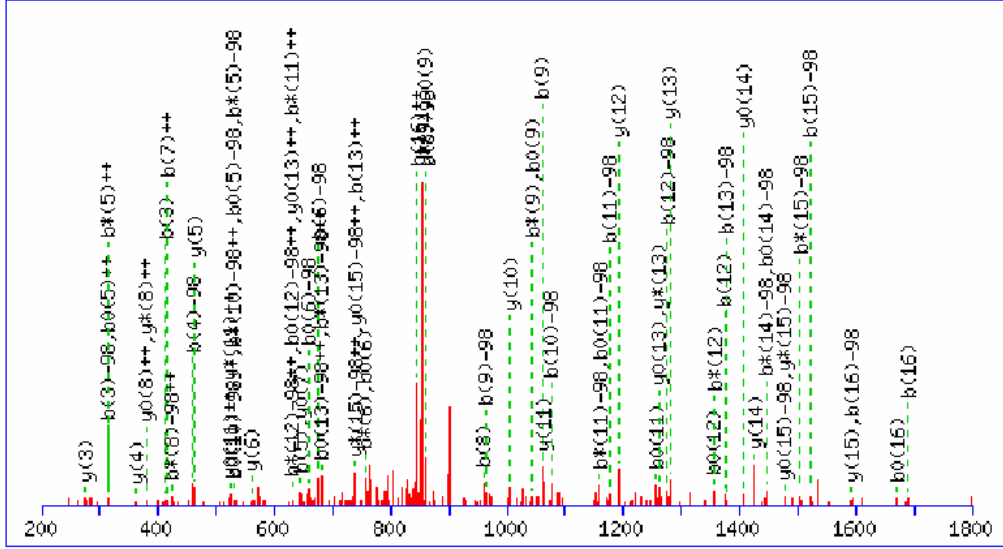

|                        |                                                              |                        |                                                               |                        |                                                               |                        |                                                               |           |                                                 |
|------------------------|--------------------------------------------------------------|------------------------|---------------------------------------------------------------|------------------------|---------------------------------------------------------------|------------------------|---------------------------------------------------------------|-----------|-------------------------------------------------|
| 74.0600 <sup>+2</sup>  | y <sub>1</sub> <sup>+2</sup>                                 | 362.2034               | y <sub>4</sub>                                                | 588.7858 <sup>+2</sup> | b <sub>11</sub> -H <sub>3</sub> PO <sub>4</sub> <sup>+2</sup> | 796.3892 <sup>+2</sup> | b <sub>16</sub> -H <sub>3</sub> PO <sub>4</sub> <sup>+2</sup> | 1275.6328 | b <sub>12</sub> -H <sub>3</sub> PO <sub>4</sub> |
| 109.5786 <sup>+2</sup> | y <sub>2</sub> <sup>+2</sup>                                 | 367.1668 <sup>+2</sup> | b <sub>7</sub> -H <sub>3</sub> PO <sub>4</sub> <sup>+2</sup>  | 596.3144 <sup>+2</sup> | y <sub>12</sub> <sup>+2</sup>                                 | 796.8638 <sup>+2</sup> | y <sub>15</sub> <sup>+2</sup>                                 | 1278.6536 | y <sub>13</sub>                                 |
| 122.5738 <sup>+2</sup> | b <sub>2</sub> <sup>+2</sup>                                 | 387.6445 <sup>+2</sup> | b <sub>6</sub> <sup>+2</sup>                                  | 637.7743 <sup>+2</sup> | b <sub>11</sub> <sup>+2</sup>                                 | 809.8591 <sup>+2</sup> | b <sub>15</sub> <sup>+2</sup>                                 | 1373.6097 | b <sub>12</sub>                                 |
| 138.0893 <sup>+2</sup> | y <sub>3</sub> <sup>+2</sup>                                 | 388.7293 <sup>+2</sup> | y <sub>8</sub> <sup>+2</sup>                                  | 638.3200 <sup>+2</sup> | b <sub>12</sub> -H <sub>3</sub> PO <sub>4</sub> <sup>+2</sup> | 831.3033               | b <sub>7</sub>                                                | 1376.6805 | b <sub>13</sub> -H <sub>3</sub> PO <sub>4</sub> |
| 147.1128               | y <sub>1</sub>                                               | 411.1388               | b <sub>3</sub>                                                | 639.8304 <sup>+2</sup> | y <sub>13</sub> <sup>+2</sup>                                 | 840.3798 <sup>+2</sup> | y <sub>16</sub> <sup>+2</sup>                                 | 1425.722  | y <sub>14</sub>                                 |
| 157.0846 <sup>+2</sup> | b <sub>3</sub> -H <sub>3</sub> PO <sub>4</sub> <sup>+2</sup> | 416.1553 <sup>+2</sup> | b <sub>7</sub> <sup>+2</sup>                                  | 645.2392               | b <sub>5</sub>                                                | 845.3776 <sup>+2</sup> | b <sub>16</sub> <sup>+2</sup>                                 | 1463.7125 | b <sub>14</sub> -H <sub>3</sub> PO <sub>4</sub> |
| 181.6053 <sup>+2</sup> | y <sub>4</sub> <sup>+2</sup>                                 | 431.1961 <sup>+2</sup> | b <sub>8</sub> -H <sub>3</sub> PO <sub>4</sub> <sup>+2</sup>  | 663.3672               | y <sub>7</sub>                                                | 861.385                | b <sub>8</sub> -H <sub>3</sub> PO <sub>4</sub>                | 1474.6574 | b <sub>13</sub>                                 |
| 206.0730 <sup>+2</sup> | b <sub>3</sub> <sup>+2</sup>                                 | 439.2531 <sup>+2</sup> | y <sub>9</sub> <sup>+2</sup>                                  | 676.3049               | b <sub>6</sub> -H <sub>3</sub> PO <sub>4</sub>                | 869.4419 <sup>+2</sup> | MH-H <sub>3</sub> PO <sub>4</sub> <sup>+2</sup>               | 1494.7435 | y <sub>15</sub> -H <sub>3</sub> PO <sub>4</sub> |
| 218.1499               | y <sub>2</sub>                                               | 460.2303               | b <sub>4</sub> -H <sub>3</sub> PO <sub>4</sub>                | 687.3085 <sup>+2</sup> | b <sub>12</sub> <sup>+2</sup>                                 | 877.4989               | y <sub>9</sub>                                                | 1520.734  | b <sub>15</sub> -H <sub>3</sub> PO <sub>4</sub> |
| 230.6188 <sup>+2</sup> | b <sub>7</sub> -H <sub>3</sub> PO <sub>4</sub> <sup>+2</sup> | 463.2511               | y <sub>5</sub>                                                | 688.8439 <sup>+2</sup> | b <sub>13</sub> -H <sub>3</sub> PO <sub>4</sub> <sup>+2</sup> | 918.4304 <sup>+2</sup> | MH <sup>+2</sup>                                              | 1561.6894 | b <sub>14</sub>                                 |
| 232.1292 <sup>+2</sup> | y <sub>5</sub> <sup>+2</sup>                                 | 480.1846 <sup>+2</sup> | b <sub>8</sub> <sup>+2</sup>                                  | 713.3646 <sup>+2</sup> | y <sub>14</sub> <sup>+2</sup>                                 | 959.3619               | b <sub>8</sub>                                                | 1581.7755 | y <sub>16</sub> -H <sub>3</sub> PO <sub>4</sub> |
| 244.1404               | b <sub>2</sub>                                               | 481.7200 <sup>+2</sup> | b <sub>9</sub> -H <sub>3</sub> PO <sub>4</sub> <sup>+2</sup>  | 732.3599 <sup>+2</sup> | b <sub>14</sub> -H <sub>3</sub> PO <sub>4</sub> <sup>+2</sup> | 962.4326               | b <sub>9</sub> -H <sub>3</sub> PO <sub>4</sub>                | 1591.7711 | b <sub>16</sub> -H <sub>3</sub> PO <sub>4</sub> |
| 274.1348 <sup>+2</sup> | b <sub>5</sub> -H <sub>3</sub> PO <sub>4</sub> <sup>+2</sup> | 503.2824 <sup>+2</sup> | y <sub>10</sub> <sup>+2</sup>                                 | 733.3264               | b <sub>7</sub> -H <sub>3</sub> PO <sub>4</sub>                | 1005.5575              | y <sub>10</sub>                                               | 1592.7204 | y <sub>15</sub>                                 |
| 275.1714               | y <sub>3</sub>                                               | 530.7084 <sup>+2</sup> | b <sub>9</sub> <sup>+2</sup>                                  | 737.8323 <sup>+2</sup> | b <sub>13</sub> <sup>+2</sup>                                 | 1060.4095              | b <sub>9</sub>                                                | 1618.7109 | b <sub>15</sub>                                 |
| 279.6072 <sup>+2</sup> | b <sub>4</sub> <sup>+2</sup>                                 | 531.7931 <sup>+2</sup> | y <sub>11</sub> <sup>+2</sup>                                 | 747.8754 <sup>+2</sup> | y <sub>15</sub> -H <sub>3</sub> PO <sub>4</sub> <sup>+2</sup> | 1062.579               | y <sub>11</sub>                                               | 1679.7524 | y <sub>16</sub>                                 |
| 281.6634 <sup>+2</sup> | y <sub>6</sub> <sup>+2</sup>                                 | 538.2620 <sup>+2</sup> | b <sub>10</sub> -H <sub>3</sub> PO <sub>4</sub> <sup>+2</sup> | 760.8706 <sup>+2</sup> | b <sub>15</sub> -H <sub>3</sub> PO <sub>4</sub> <sup>+2</sup> | 1075.5167              | b <sub>10</sub> -H <sub>3</sub> PO <sub>4</sub>               | 1689.748  | b <sub>16</sub>                                 |
| 313.1619               | b <sub>3</sub> -H <sub>3</sub> PO <sub>4</sub>               | 547.2623               | b <sub>5</sub> -H <sub>3</sub> PO <sub>4</sub>                | 774.2818               | b <sub>6</sub>                                                | 1173.4936              | b <sub>10</sub>                                               | 1737.8766 | MH-H <sub>3</sub> PO <sub>4</sub>               |
| 323.1232 <sup>+2</sup> | b <sub>5</sub> <sup>+2</sup>                                 | 558.2072               | b <sub>4</sub>                                                | 776.4512               | y <sub>8</sub>                                                | 1176.5644              | b <sub>11</sub> -H <sub>3</sub> PO <sub>4</sub>               | 1835.8535 | MH                                              |
| 332.1872 <sup>+2</sup> | y <sub>7</sub> <sup>+2</sup>                                 | 562.3195               | y <sub>6</sub>                                                | 781.3483 <sup>+2</sup> | b <sub>14</sub> <sup>+2</sup>                                 | 1191.6216              | y <sub>12</sub>                                               |           |                                                 |
| 338.6561 <sup>+2</sup> | b <sub>6</sub> -H <sub>3</sub> PO <sub>4</sub> <sup>+2</sup> | 587.2504 <sup>+2</sup> | b <sub>10</sub> <sup>+2</sup>                                 | 791.3914 <sup>+2</sup> | y <sub>16</sub> -H <sub>3</sub> PO <sub>4</sub> <sup>+2</sup> | 1274.5413              | b <sub>11</sub>                                               |           |                                                 |

MS/MS Fragmentation of SLsVPVDSLR  
 Found in IPI00009900, Protein FAM53C

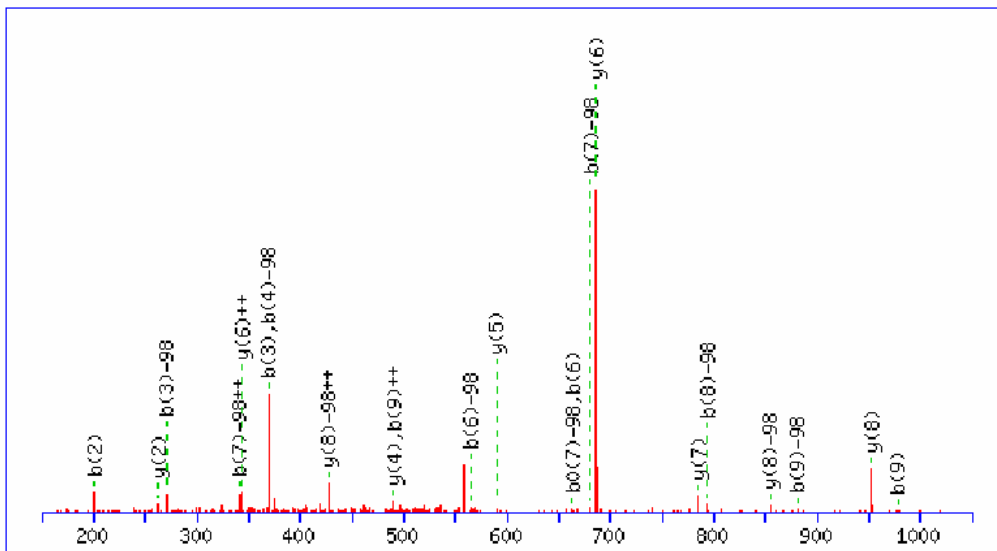

|                        |                                                |                        |                                                              |                        |                                                              |          |                                                |           |                                                |
|------------------------|------------------------------------------------|------------------------|--------------------------------------------------------------|------------------------|--------------------------------------------------------------|----------|------------------------------------------------|-----------|------------------------------------------------|
| 88.0631 <sup>+2</sup>  | y <sub>1</sub> <sup>+2</sup>                   | 343.6952 <sup>+2</sup> | y <sub>6</sub> <sup>+2</sup>                                 | 484.2822 <sup>+2</sup> | y <sub>9</sub> -H <sub>3</sub> PO <sub>4</sub> <sup>+2</sup> | 680.3614 | b <sub>7</sub> -H <sub>3</sub> PO <sub>4</sub> | 967.5571  | y <sub>9</sub> -H <sub>3</sub> PO <sub>4</sub> |
| 131.5791 <sup>+2</sup> | y <sub>2</sub> <sup>+2</sup>                   | 368.1217               | b <sub>3</sub>                                               | 490.262                | y <sub>4</sub>                                               | 686.3832 | y <sub>6</sub>                                 | 978.4544  | b <sub>9</sub>                                 |
| 175.119                | y <sub>1</sub>                                 | 369.2132               | b <sub>4</sub> -H <sub>3</sub> PO <sub>4</sub>               | 527.7982 <sup>+2</sup> | MH-H <sub>3</sub> PO <sub>4</sub> <sup>+2</sup>              | 778.3383 | b <sub>7</sub>                                 | 1054.5891 | MH-H <sub>3</sub> PO <sub>4</sub>              |
| 188.1212 <sup>+2</sup> | y <sub>3</sub> <sup>+2</sup>                   | 375.235                | y <sub>3</sub>                                               | 533.2706 <sup>+2</sup> | y <sub>9</sub> <sup>+2</sup>                                 | 785.4516 | y <sub>7</sub>                                 | 1065.534  | y <sub>9</sub>                                 |
| 201.1234               | b <sub>2</sub>                                 | 393.2294 <sup>+2</sup> | y <sub>7</sub> <sup>+2</sup>                                 | 564.2429               | b <sub>5</sub>                                               | 793.4454 | b <sub>8</sub> -H <sub>3</sub> PO <sub>4</sub> | 1152.566  | MH                                             |
| 245.6346 <sup>+2</sup> | y <sub>4</sub> <sup>+2</sup>                   | 427.7402 <sup>+2</sup> | y <sub>8</sub> -H <sub>3</sub> PO <sub>4</sub> <sup>+2</sup> | 565.3344               | b <sub>6</sub> -H <sub>3</sub> PO <sub>4</sub>               | 854.473  | y <sub>8</sub> -H <sub>3</sub> PO <sub>4</sub> |           |                                                |
| 262.151                | y <sub>2</sub>                                 | 466.266                | b <sub>5</sub> -H <sub>3</sub> PO <sub>4</sub>               | 576.7867 <sup>+2</sup> | MH <sup>+2</sup>                                             | 880.4775 | b <sub>9</sub> -H <sub>3</sub> PO <sub>4</sub> |           |                                                |
| 270.1448               | b <sub>3</sub> -H <sub>3</sub> PO <sub>4</sub> | 467.1901               | b <sub>4</sub>                                               | 589.3304               | y <sub>5</sub>                                               | 891.4223 | b <sub>8</sub>                                 |           |                                                |
| 295.1688 <sup>+2</sup> | y <sub>5</sub> <sup>+2</sup>                   | 476.7286 <sup>+2</sup> | y <sub>8</sub> <sup>+2</sup>                                 | 663.3113               | b <sub>6</sub>                                               | 952.4499 | y <sub>8</sub>                                 |           |                                                |

MS/MS Fragmentation of RFsLsPSLGPQASR  
 Found in IPI00009900, Protein FAM53C

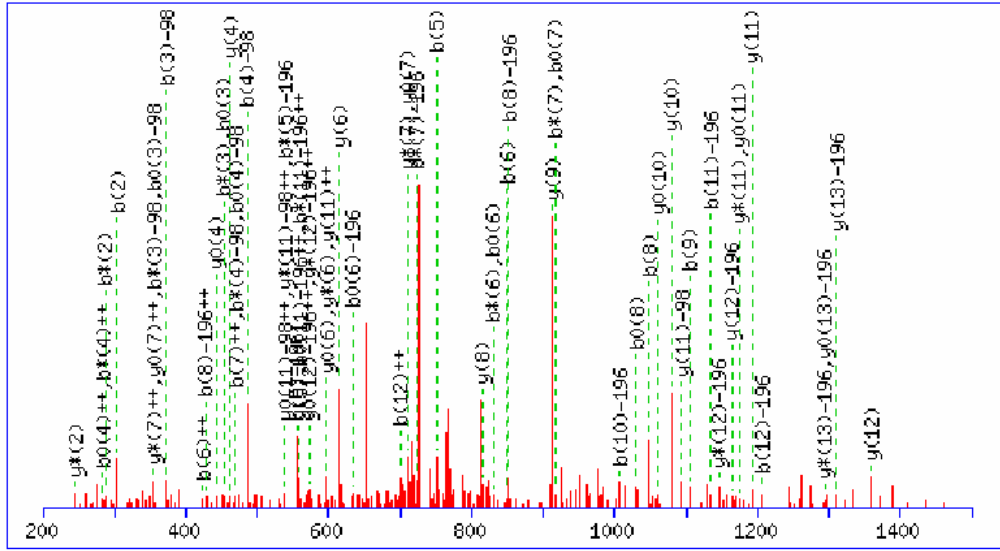

|                        |                                                               |                        |                                                                |                        |                                                                |                        |                                                  |           |                                                  |
|------------------------|---------------------------------------------------------------|------------------------|----------------------------------------------------------------|------------------------|----------------------------------------------------------------|------------------------|--------------------------------------------------|-----------|--------------------------------------------------|
| 88.0631 <sup>+2</sup>  | y <sub>1</sub> <sup>+2</sup>                                  | 376.1324 <sup>+2</sup> | b <sub>5</sub> <sup>+2</sup>                                   | 567.8064 <sup>+2</sup> | b <sub>11</sub> -2H <sub>3</sub> PO <sub>4</sub> <sup>+2</sup> | 750.3335               | b <sub>6</sub> -H <sub>3</sub> PO <sub>4</sub>   | 1163.6167 | y <sub>12</sub> -2H <sub>3</sub> PO <sub>4</sub> |
| 131.5791 <sup>+2</sup> | y <sub>2</sub> <sup>+2</sup>                                  | 408.2221 <sup>+2</sup> | y <sub>8</sub> <sup>+2</sup>                                   | 582.3120 <sup>+2</sup> | y <sub>12</sub> -2H <sub>3</sub> PO <sub>4</sub> <sup>+2</sup> | 751.2576               | b <sub>5</sub>                                   | 1192.5722 | y <sub>11</sub>                                  |
| 152.5920 <sup>+2</sup> | b <sub>2</sub> <sup>+2</sup>                                  | 419.1864 <sup>+2</sup> | b <sub>7</sub> -H <sub>3</sub> PO <sub>4</sub> <sup>+2</sup>   | 584.2592               | b <sub>4</sub>                                                 | 753.8231 <sup>+2</sup> | y <sub>13</sub> <sup>+2</sup>                    | 1202.5007 | b <sub>10</sub>                                  |
| 167.0977 <sup>+2</sup> | y <sub>3</sub> <sup>+2</sup>                                  | 424.6588 <sup>+2</sup> | b <sub>6</sub> <sup>+2</sup>                                   | 596.7897 <sup>+2</sup> | y <sub>11</sub> <sup>+2</sup>                                  | 782.8852 <sup>+2</sup> | MH-H <sub>3</sub> PO <sub>4</sub> <sup>+2</sup>  | 1205.6426 | b <sub>12</sub> -2H <sub>3</sub> PO <sub>4</sub> |
| 175.119                | y <sub>1</sub>                                                | 426.7400 <sup>+2</sup> | b <sub>8</sub> -2H <sub>3</sub> PO <sub>4</sub> <sup>+2</sup>  | 601.7540 <sup>+2</sup> | b <sub>10</sub> <sup>+2</sup>                                  | 815.437                | y <sub>8</sub>                                   | 1232.5823 | b <sub>11</sub> -H <sub>3</sub> PO <sub>4</sub>  |
| 187.1028 <sup>+2</sup> | b <sub>3</sub> -H <sub>3</sub> PO <sub>4</sub> <sup>+2</sup>  | 455.2507 <sup>+2</sup> | b <sub>9</sub> -2H <sub>3</sub> PO <sub>4</sub> <sup>+2</sup>  | 603.3249 <sup>+2</sup> | b <sub>12</sub> -2H <sub>3</sub> PO <sub>4</sub> <sup>+2</sup> | 831.8737 <sup>+2</sup> | MH <sup>+2</sup>                                 | 1261.5936 | y <sub>12</sub> -H <sub>3</sub> PO <sub>4</sub>  |
| 231.1270 <sup>+2</sup> | y <sub>4</sub> <sup>+2</sup>                                  | 456.7485 <sup>+2</sup> | y <sub>9</sub> <sup>+2</sup>                                   | 615.3209               | y <sub>6</sub>                                                 | 837.3655               | b <sub>7</sub> -H <sub>3</sub> PO <sub>4</sub>   | 1292.6746 | b <sub>13</sub> -2H <sub>3</sub> PO <sub>4</sub> |
| 236.0912 <sup>+2</sup> | b <sub>3</sub> <sup>+2</sup>                                  | 461.2467               | y <sub>4</sub>                                                 | 616.7948 <sup>+2</sup> | b <sub>11</sub> -H <sub>3</sub> PO <sub>4</sub> <sup>+2</sup>  | 848.3103               | b <sub>6</sub>                                   | 1303.6195 | b <sub>12</sub> -2H <sub>3</sub> PO <sub>4</sub> |
| 243.6448 <sup>+2</sup> | b <sub>4</sub> -H <sub>3</sub> PO <sub>4</sub> <sup>+2</sup>  | 468.1748 <sup>+2</sup> | b <sub>7</sub> <sup>+2</sup>                                   | 631.3005 <sup>+2</sup> | y <sub>12</sub> -H <sub>3</sub> PO <sub>4</sub> <sup>+2</sup>  | 852.4726               | b <sub>8</sub> -2H <sub>3</sub> PO <sub>4</sub>  | 1310.6852 | y <sub>13</sub> -2H <sub>3</sub> PO <sub>4</sub> |
| 262.151                | y <sub>2</sub>                                                | 471.1752               | b <sub>3</sub>                                                 | 646.8409 <sup>+2</sup> | b <sub>13</sub> -2H <sub>3</sub> PO <sub>4</sub> <sup>+2</sup> | 909.4941               | b <sub>9</sub> -2H <sub>3</sub> PO <sub>4</sub>  | 1330.5592 | b <sub>11</sub>                                  |
| 278.1555 <sup>+2</sup> | b <sub>5</sub> -2H <sub>3</sub> PO <sub>4</sub> <sup>+2</sup> | 475.7284 <sup>+2</sup> | b <sub>8</sub> -H <sub>3</sub> PO <sub>4</sub> <sup>+2</sup>   | 652.3134 <sup>+2</sup> | b <sub>12</sub> -H <sub>3</sub> PO <sub>4</sub> <sup>+2</sup>  | 912.4898               | y <sub>9</sub>                                   | 1359.5705 | y <sub>12</sub>                                  |
| 279.6534 <sup>+2</sup> | y <sub>5</sub> <sup>+2</sup>                                  | 486.2823               | b <sub>4</sub> -H <sub>3</sub> PO <sub>4</sub>                 | 652.3566               | b <sub>6</sub> -2H <sub>3</sub> PO <sub>4</sub>                | 935.3424               | b <sub>7</sub>                                   | 1390.6515 | b <sub>13</sub> -H <sub>3</sub> PO <sub>4</sub>  |
| 292.6333 <sup>+2</sup> | b <sub>4</sub> <sup>+2</sup>                                  | 491.2592 <sup>+2</sup> | y <sub>10</sub> -H <sub>3</sub> PO <sub>4</sub> <sup>+2</sup>  | 653.2807               | b <sub>5</sub> -H <sub>3</sub> PO <sub>4</sub>                 | 950.4495               | b <sub>8</sub> -H <sub>3</sub> PO <sub>4</sub>   | 1401.5964 | b <sub>12</sub>                                  |
| 304.1768               | b <sub>2</sub>                                                | 503.7771 <sup>+2</sup> | b <sub>10</sub> -2H <sub>3</sub> PO <sub>4</sub> <sup>+2</sup> | 655.8462 <sup>+2</sup> | y <sub>13</sub> -2H <sub>3</sub> PO <sub>4</sub> <sup>+2</sup> | 981.5112               | y <sub>10</sub> -H <sub>3</sub> PO <sub>4</sub>  | 1408.6621 | y <sub>13</sub> -H <sub>3</sub> PO <sub>4</sub>  |
| 308.1641 <sup>+2</sup> | y <sub>6</sub> <sup>+2</sup>                                  | 504.2391 <sup>+2</sup> | b <sub>9</sub> -H <sub>3</sub> PO <sub>4</sub> <sup>+2</sup>   | 665.7833 <sup>+2</sup> | b <sub>11</sub> <sup>+2</sup>                                  | 1006.5469              | b <sub>10</sub> -2H <sub>3</sub> PO <sub>4</sub> | 1488.6284 | b <sub>13</sub>                                  |
| 326.6819 <sup>+2</sup> | b <sub>6</sub> -2H <sub>3</sub> PO <sub>4</sub> <sup>+2</sup> | 524.7169 <sup>+2</sup> | b <sub>8</sub> <sup>+2</sup>                                   | 680.2889 <sup>+2</sup> | y <sub>12</sub> <sup>+2</sup>                                  | 1007.471               | b <sub>9</sub> -H <sub>3</sub> PO <sub>4</sub>   | 1506.639  | y <sub>13</sub>                                  |
| 327.1440 <sup>+2</sup> | b <sub>5</sub> -H <sub>3</sub> PO <sub>4</sub> <sup>+2</sup>  | 540.2477 <sup>+2</sup> | y <sub>10</sub> <sup>+2</sup>                                  | 695.8294 <sup>+2</sup> | b <sub>13</sub> -H <sub>3</sub> PO <sub>4</sub> <sup>+2</sup>  | 1048.4264              | b <sub>8</sub>                                   | 1564.7632 | MH-H <sub>3</sub> PO <sub>4</sub>                |
| 333.1881               | y <sub>3</sub>                                                | 547.8013 <sup>+2</sup> | y <sub>11</sub> -H <sub>3</sub> PO <sub>4</sub> <sup>+2</sup>  | 701.3018 <sup>+2</sup> | b <sub>12</sub> <sup>+2</sup>                                  | 1079.4881              | y <sub>10</sub>                                  | 1662.7401 | MH                                               |
| 364.7061 <sup>+2</sup> | y <sub>7</sub> <sup>+2</sup>                                  | 552.7655 <sup>+2</sup> | b <sub>10</sub> -H <sub>3</sub> PO <sub>4</sub> <sup>+2</sup>  | 704.8347 <sup>+2</sup> | y <sub>13</sub> -H <sub>3</sub> PO <sub>4</sub> <sup>+2</sup>  | 1094.5953              | y <sub>11</sub> -H <sub>3</sub> PO <sub>4</sub>  |           |                                                  |
| 370.1979 <sup>+2</sup> | b <sub>7</sub> -2H <sub>3</sub> PO <sub>4</sub> <sup>+2</sup> | 553.2276 <sup>+2</sup> | b <sub>9</sub> <sup>+2</sup>                                   | 728.405                | y <sub>7</sub>                                                 | 1104.5238              | b <sub>10</sub> -H <sub>3</sub> PO <sub>4</sub>  |           |                                                  |
| 373.1983               | b <sub>3</sub> -H <sub>3</sub> PO <sub>4</sub>                | 555.3038               | b <sub>5</sub> -2H <sub>3</sub> PO <sub>4</sub>                | 739.3886               | b <sub>7</sub> -2H <sub>3</sub> PO <sub>4</sub>                | 1105.4479              | b <sub>9</sub>                                   |           |                                                  |
| 375.6704 <sup>+2</sup> | b <sub>6</sub> -H <sub>3</sub> PO <sub>4</sub> <sup>+2</sup>  | 558.2994               | y <sub>5</sub>                                                 | 744.8178 <sup>+2</sup> | b <sub>13</sub> <sup>+2</sup>                                  | 1134.6055              | b <sub>11</sub> -2H <sub>3</sub> PO <sub>4</sub> |           |                                                  |

MS/MS Fragmentation of ATSEIFHsQSFLATGSNLR  
Found in IPI00153055, Isoform 2 of Septin-10

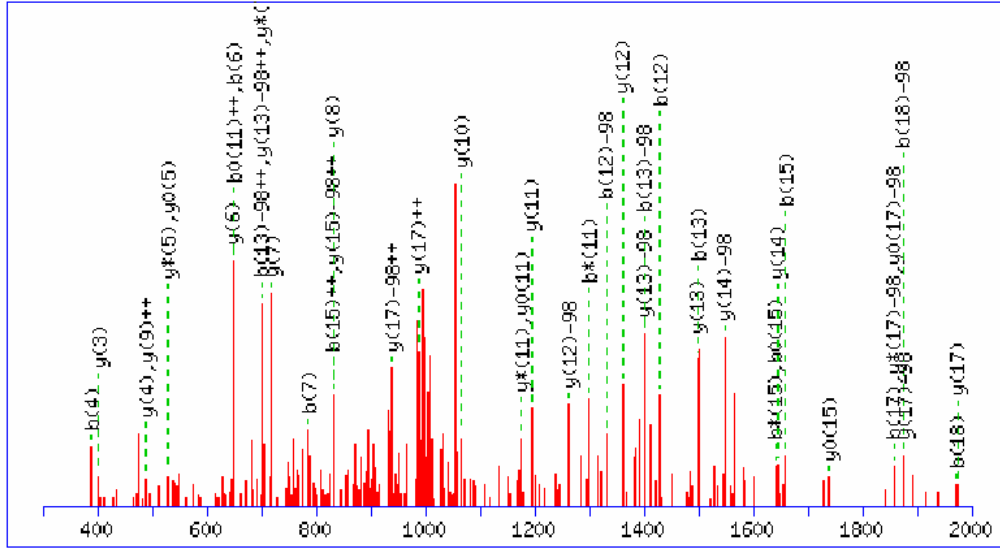

|                        |                                                              |                        |                                                               |                        |                                                               |                         |                                                               |           |                                                 |
|------------------------|--------------------------------------------------------------|------------------------|---------------------------------------------------------------|------------------------|---------------------------------------------------------------|-------------------------|---------------------------------------------------------------|-----------|-------------------------------------------------|
| 88.0631 <sup>+2</sup>  | y <sub>1</sub> <sup>+2</sup>                                 | 533.2880 <sup>+2</sup> | y <sub>10</sub> <sup>+2</sup>                                 | 780.3781 <sup>+2</sup> | b <sub>15</sub> -H <sub>3</sub> PO <sub>4</sub> <sup>+2</sup> | 987.4595 <sup>+2</sup>  | y <sub>17</sub> <sup>+2</sup>                                 | 1546.7761 | y <sub>14</sub> -H <sub>3</sub> PO <sub>4</sub> |
| 144.6051 <sup>+2</sup> | y <sub>2</sub> <sup>+2</sup>                                 | 535.7487 <sup>+2</sup> | b <sub>10</sub> -H <sub>3</sub> PO <sub>4</sub> <sup>+2</sup> | 786.3781               | b <sub>7</sub>                                                | 988.9949 <sup>+2</sup>  | y <sub>18</sub> -H <sub>3</sub> PO <sub>4</sub> <sup>+2</sup> | 1559.7489 | b <sub>15</sub> -H <sub>3</sub> PO <sub>4</sub> |
| 173.0921               | b <sub>2</sub>                                               | 541.2211 <sup>+2</sup> | b <sub>9</sub> <sup>+2</sup>                                  | 800.8558 <sup>+2</sup> | b <sub>14</sub> <sup>+2</sup>                                 | 1024.5134 <sup>+2</sup> | MH-H <sub>3</sub> PO <sub>4</sub> <sup>+2</sup>               | 1600.7043 | b <sub>14</sub>                                 |
| 175.119                | y <sub>1</sub>                                               | 546.2994               | y <sub>5</sub>                                                | 822.8801 <sup>+2</sup> | y <sub>14</sub> <sup>+2</sup>                                 | 1037.9833 <sup>+2</sup> | y <sub>18</sub> <sup>+2</sup>                                 | 1644.753  | y <sub>14</sub>                                 |
| 201.6266 <sup>+2</sup> | y <sub>3</sub> <sup>+2</sup>                                 | 584.7372 <sup>+2</sup> | b <sub>10</sub> <sup>+2</sup>                                 | 823.8941 <sup>+2</sup> | b <sub>16</sub> -H <sub>3</sub> PO <sub>4</sub> <sup>+2</sup> | 1065.5687               | y <sub>10</sub>                                               | 1646.7809 | b <sub>16</sub> -H <sub>3</sub> PO <sub>4</sub> |
| 245.1426 <sup>+2</sup> | y <sub>4</sub> <sup>+2</sup>                                 | 597.3173 <sup>+2</sup> | y <sub>11</sub> <sup>+2</sup>                                 | 829.3665 <sup>+2</sup> | b <sub>15</sub> <sup>+2</sup>                                 | 1070.4901               | b <sub>10</sub> -H <sub>3</sub> PO <sub>4</sub>               | 1657.7258 | b <sub>15</sub>                                 |
| 260.1241               | b <sub>3</sub>                                               | 609.2829 <sup>+2</sup> | b <sub>11</sub> -H <sub>3</sub> PO <sub>4</sub> <sup>+2</sup> | 830.4337 <sup>+2</sup> | y <sub>15</sub> -H <sub>3</sub> PO <sub>4</sub> <sup>+2</sup> | 1073.5019 <sup>+2</sup> | MH <sup>+2</sup>                                              | 1659.8602 | y <sub>15</sub> -H <sub>3</sub> PO <sub>4</sub> |
| 273.6534 <sup>+2</sup> | y <sub>5</sub> <sup>+2</sup>                                 | 631.8280 <sup>+2</sup> | y <sub>12</sub> -H <sub>3</sub> PO <sub>4</sub> <sup>+2</sup> | 831.4683               | y <sub>8</sub>                                                | 1081.435                | b <sub>9</sub>                                                | 1744.7578 | b <sub>16</sub>                                 |
| 288.203                | y <sub>2</sub>                                               | 647.3471               | y <sub>6</sub>                                                | 855.3995               | b <sub>8</sub> -H <sub>3</sub> PO <sub>4</sub>                | 1168.467                | b <sub>10</sub>                                               | 1757.8371 | y <sub>15</sub>                                 |
| 324.1772 <sup>+2</sup> | y <sub>6</sub> <sup>+2</sup>                                 | 649.3192               | b <sub>6</sub>                                                | 872.8825 <sup>+2</sup> | b <sub>16</sub> <sup>+2</sup>                                 | 1193.6273               | y <sub>11</sub>                                               | 1760.8238 | b <sub>17</sub> -H <sub>3</sub> PO <sub>4</sub> |
| 359.6958 <sup>+2</sup> | y <sub>7</sub> <sup>+2</sup>                                 | 658.2714 <sup>+2</sup> | b <sub>11</sub> <sup>+2</sup>                                 | 879.4222 <sup>+2</sup> | y <sub>15</sub> <sup>+2</sup>                                 | 1217.5586               | b <sub>11</sub> -H <sub>3</sub> PO <sub>4</sub>               | 1788.9028 | y <sub>16</sub> -H <sub>3</sub> PO <sub>4</sub> |
| 389.1667               | b <sub>4</sub>                                               | 665.8250 <sup>+2</sup> | b <sub>12</sub> -H <sub>3</sub> PO <sub>4</sub> <sup>+2</sup> | 880.9156 <sup>+2</sup> | b <sub>17</sub> -H <sub>3</sub> PO <sub>4</sub> <sup>+2</sup> | 1262.6488               | y <sub>12</sub> -H <sub>3</sub> PO <sub>4</sub>               | 1858.8007 | b <sub>17</sub>                                 |
| 393.6927 <sup>+2</sup> | b <sub>7</sub> <sup>+2</sup>                                 | 680.8165 <sup>+2</sup> | y <sub>12</sub> <sup>+2</sup>                                 | 894.9550 <sup>+2</sup> | y <sub>16</sub> -H <sub>3</sub> PO <sub>4</sub> <sup>+2</sup> | 1315.5355               | b <sub>11</sub>                                               | 1873.9079 | b <sub>18</sub> -H <sub>3</sub> PO <sub>4</sub> |
| 402.2459               | y <sub>3</sub>                                               | 700.3575 <sup>+2</sup> | y <sub>13</sub> -H <sub>3</sub> PO <sub>4</sub> <sup>+2</sup> | 929.9040 <sup>+2</sup> | b <sub>17</sub> <sup>+2</sup>                                 | 1330.6426               | b <sub>12</sub> -H <sub>3</sub> PO <sub>4</sub>               | 1875.9348 | y <sub>17</sub> -H <sub>3</sub> PO <sub>4</sub> |
| 416.2378 <sup>+2</sup> | y <sub>8</sub> <sup>+2</sup>                                 | 701.3435 <sup>+2</sup> | b <sub>13</sub> -H <sub>3</sub> PO <sub>4</sub> <sup>+2</sup> | 937.4576 <sup>+2</sup> | b <sub>18</sub> -H <sub>3</sub> PO <sub>4</sub> <sup>+2</sup> | 1360.6257               | y <sub>12</sub>                                               | 1886.8797 | y <sub>16</sub>                                 |
| 428.2034 <sup>+2</sup> | b <sub>8</sub> -H <sub>3</sub> PO <sub>4</sub> <sup>+2</sup> | 714.8134 <sup>+2</sup> | b <sub>12</sub> <sup>+2</sup>                                 | 938.4710 <sup>+2</sup> | y <sub>17</sub> -H <sub>3</sub> PO <sub>4</sub> <sup>+2</sup> | 1399.7077               | y <sub>13</sub> -H <sub>3</sub> PO <sub>4</sub>               | 1971.8848 | b <sub>18</sub>                                 |
| 477.1919 <sup>+2</sup> | b <sub>8</sub> <sup>+2</sup>                                 | 718.3842               | y <sub>7</sub>                                                | 943.9435 <sup>+2</sup> | y <sub>16</sub> <sup>+2</sup>                                 | 1401.6797               | b <sub>13</sub> -H <sub>3</sub> PO <sub>4</sub>               | 1973.9117 | y <sub>17</sub>                                 |
| 489.278                | y <sub>4</sub>                                               | 749.3459 <sup>+2</sup> | y <sub>13</sub> <sup>+2</sup>                                 | 953.3764               | b <sub>8</sub>                                                | 1428.6195               | b <sub>12</sub>                                               | 1976.9825 | y <sub>18</sub> -H <sub>3</sub> PO <sub>4</sub> |
| 489.7720 <sup>+2</sup> | y <sub>9</sub> <sup>+2</sup>                                 | 750.3320 <sup>+2</sup> | b <sub>13</sub> <sup>+2</sup>                                 | 978.5367               | y <sub>9</sub>                                                | 1497.6846               | y <sub>13</sub>                                               | 2048.0196 | MH-H <sub>3</sub> PO <sub>4</sub>               |
| 492.2327 <sup>+2</sup> | b <sub>9</sub> -H <sub>3</sub> PO <sub>4</sub> <sup>+2</sup> | 751.8673 <sup>+2</sup> | b <sub>14</sub> -H <sub>3</sub> PO <sub>4</sub> <sup>+2</sup> | 983.4581               | b <sub>9</sub> -H <sub>3</sub> PO <sub>4</sub>                | 1499.6566               | b <sub>13</sub>                                               | 2074.9594 | y <sub>18</sub>                                 |
| 502.2508               | b <sub>5</sub>                                               | 773.8917 <sup>+2</sup> | y <sub>14</sub> -H <sub>3</sub> PO <sub>4</sub> <sup>+2</sup> | 986.4460 <sup>+2</sup> | b <sub>18</sub> <sup>+2</sup>                                 | 1502.7274               | b <sub>14</sub> -H <sub>3</sub> PO <sub>4</sub>               | 2145.9965 | MH                                              |

MS/MS Fragmentation of DQLSQNVHALVsFR  
 Found in IPI00414743, PREDICTED: SH2 domain containing 5

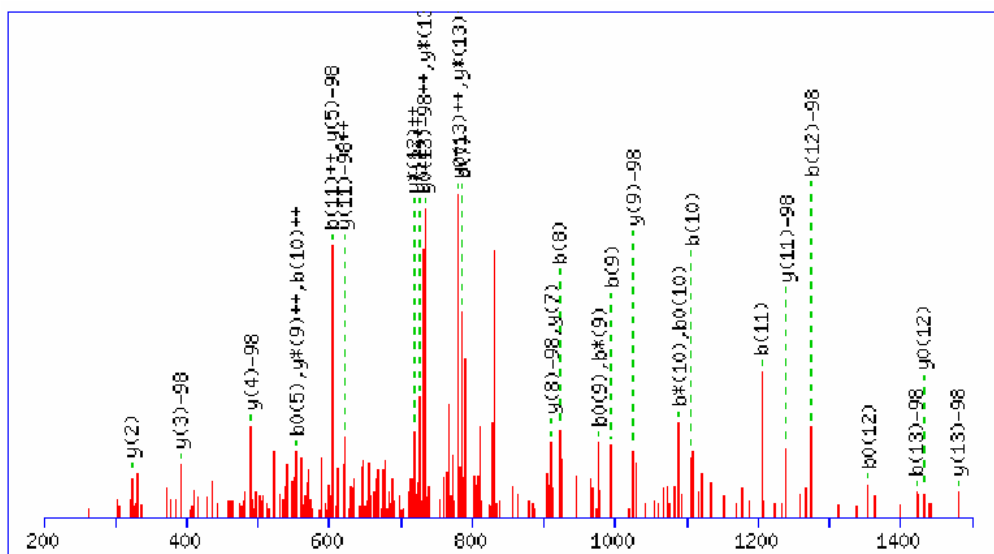

|                        |                                                              |                        |                                                               |                        |                                                               |                        |                                                 |           |                                                 |
|------------------------|--------------------------------------------------------------|------------------------|---------------------------------------------------------------|------------------------|---------------------------------------------------------------|------------------------|-------------------------------------------------|-----------|-------------------------------------------------|
| 88.0631 <sup>+2</sup>  | y <sub>1</sub> <sup>+2</sup>                                 | 406.2323 <sup>+2</sup> | y <sub>7</sub> -H <sub>3</sub> PO <sub>4</sub> <sup>+2</sup>  | 603.3173 <sup>+2</sup> | b <sub>11</sub> <sup>+2</sup>                                 | 772.3753               | y <sub>6</sub>                                  | 1205.6273 | b <sub>11</sub>                                 |
| 161.5973 <sup>+2</sup> | y <sub>2</sub> <sup>+2</sup>                                 | 444.2089               | b <sub>4</sub>                                                | 603.3613               | y <sub>5</sub> -H <sub>3</sub> PO <sub>4</sub>                | 785.3788               | b <sub>7</sub>                                  | 1239.6593 | y <sub>11</sub> -H <sub>3</sub> PO <sub>4</sub> |
| 175.119                | y <sub>1</sub>                                               | 455.2208 <sup>+2</sup> | y <sub>7</sub> <sup>+2</sup>                                  | 620.3333 <sup>+2</sup> | y <sub>11</sub> -H <sub>3</sub> PO <sub>4</sub> <sup>+2</sup> | 789.8930 <sup>+2</sup> | y <sub>13</sub> <sup>+2</sup>                   | 1250.6041 | y <sub>10</sub>                                 |
| 196.1081 <sup>+2</sup> | y <sub>3</sub> -H <sub>3</sub> PO <sub>4</sub> <sup>+2</sup> | 455.7665 <sup>+2</sup> | y <sub>8</sub> -H <sub>3</sub> PO <sub>4</sub> <sup>+2</sup>  | 625.8057 <sup>+2</sup> | y <sub>10</sub> <sup>+2</sup>                                 | 798.4181 <sup>+2</sup> | MH-H <sub>3</sub> PO <sub>4</sub> <sup>+2</sup> | 1274.6488 | b <sub>12</sub> -H <sub>3</sub> PO <sub>4</sub> |
| 244.0928               | b <sub>2</sub>                                               | 461.7225 <sup>+2</sup> | b <sub>8</sub> <sup>+2</sup>                                  | 637.8280 <sup>+2</sup> | b <sub>12</sub> -H <sub>3</sub> PO <sub>4</sub> <sup>+2</sup> | 811.4573               | y <sub>7</sub> -H <sub>3</sub> PO <sub>4</sub>  | 1337.6362 | y <sub>11</sub>                                 |
| 245.0965 <sup>+2</sup> | y <sub>3</sub> <sup>+2</sup>                                 | 489.1857               | y <sub>3</sub>                                                | 669.3217 <sup>+2</sup> | y <sub>11</sub> <sup>+2</sup>                                 | 847.4065 <sup>+2</sup> | MH <sup>+2</sup>                                | 1352.7433 | y <sub>12</sub> -H <sub>3</sub> PO <sub>4</sub> |
| 245.6423 <sup>+2</sup> | y <sub>4</sub> -H <sub>3</sub> PO <sub>4</sub> <sup>+2</sup> | 490.2772               | y <sub>4</sub> -H <sub>3</sub> PO <sub>4</sub>                | 674.3984               | y <sub>6</sub> -H <sub>3</sub> PO <sub>4</sub>                | 909.4342               | y <sub>7</sub>                                  | 1372.6257 | b <sub>12</sub>                                 |
| 294.6307 <sup>+2</sup> | y <sub>4</sub> <sup>+2</sup>                                 | 497.2411 <sup>+2</sup> | b <sub>9</sub> <sup>+2</sup>                                  | 676.8753 <sup>+2</sup> | y <sub>12</sub> -H <sub>3</sub> PO <sub>4</sub> <sup>+2</sup> | 910.5257               | y <sub>8</sub> -H <sub>3</sub> PO <sub>4</sub>  | 1421.7172 | b <sub>13</sub> -H <sub>3</sub> PO <sub>4</sub> |
| 302.1843 <sup>+2</sup> | y <sub>5</sub> -H <sub>3</sub> PO <sub>4</sub> <sup>+2</sup> | 504.7550 <sup>+2</sup> | y <sub>8</sub> <sup>+2</sup>                                  | 686.3104               | b <sub>6</sub>                                                | 922.4377               | b <sub>8</sub>                                  | 1450.7202 | y <sub>12</sub>                                 |
| 322.1874               | y <sub>2</sub>                                               | 512.7880 <sup>+2</sup> | y <sub>9</sub> -H <sub>3</sub> PO <sub>4</sub> <sup>+2</sup>  | 686.8165 <sup>+2</sup> | b <sub>12</sub> <sup>+2</sup>                                 | 993.4748               | b <sub>9</sub>                                  | 1480.8019 | y <sub>13</sub> -H <sub>3</sub> PO <sub>4</sub> |
| 337.7028 <sup>+2</sup> | y <sub>6</sub> -H <sub>3</sub> PO <sub>4</sub> <sup>+2</sup> | 553.7831 <sup>+2</sup> | b <sub>10</sub> <sup>+2</sup>                                 | 701.3382               | y <sub>5</sub>                                                | 1008.5026              | y <sub>8</sub>                                  | 1519.6941 | b <sub>13</sub>                                 |
| 351.1727 <sup>+2</sup> | y <sub>5</sub> <sup>+2</sup>                                 | 561.7764 <sup>+2</sup> | y <sub>9</sub> <sup>+2</sup>                                  | 711.3622 <sup>+2</sup> | b <sub>13</sub> -H <sub>3</sub> PO <sub>4</sub> <sup>+2</sup> | 1024.5687              | y <sub>9</sub> -H <sub>3</sub> PO <sub>4</sub>  | 1578.7788 | y <sub>13</sub>                                 |
| 357.1769               | b <sub>3</sub>                                               | 572.2675               | b <sub>5</sub>                                                | 725.8638 <sup>+2</sup> | y <sub>12</sub> <sup>+2</sup>                                 | 1106.5589              | b <sub>10</sub>                                 | 1595.8289 | MH-H <sub>3</sub> PO <sub>4</sub>               |
| 386.6913 <sup>+2</sup> | y <sub>6</sub> <sup>+2</sup>                                 | 576.8173 <sup>+2</sup> | y <sub>10</sub> -H <sub>3</sub> PO <sub>4</sub> <sup>+2</sup> | 740.9046 <sup>+2</sup> | y <sub>13</sub> -H <sub>3</sub> PO <sub>4</sub> <sup>+2</sup> | 1122.5456              | y <sub>9</sub>                                  | 1693.8058 | MH                                              |
| 391.2088               | y <sub>3</sub> -H <sub>3</sub> PO <sub>4</sub>               | 588.2541               | y <sub>4</sub>                                                | 760.3507 <sup>+2</sup> | b <sub>13</sub> <sup>+2</sup>                                 | 1152.6273              | y <sub>10</sub> -H <sub>3</sub> PO <sub>4</sub> |           |                                                 |

MS/MS Fragmentation of RPLsGPDVGTGPAGLASGAK  
 Found in IPI00014068, Isoform 1 of Serine/threonine-protein kinase PAK 4

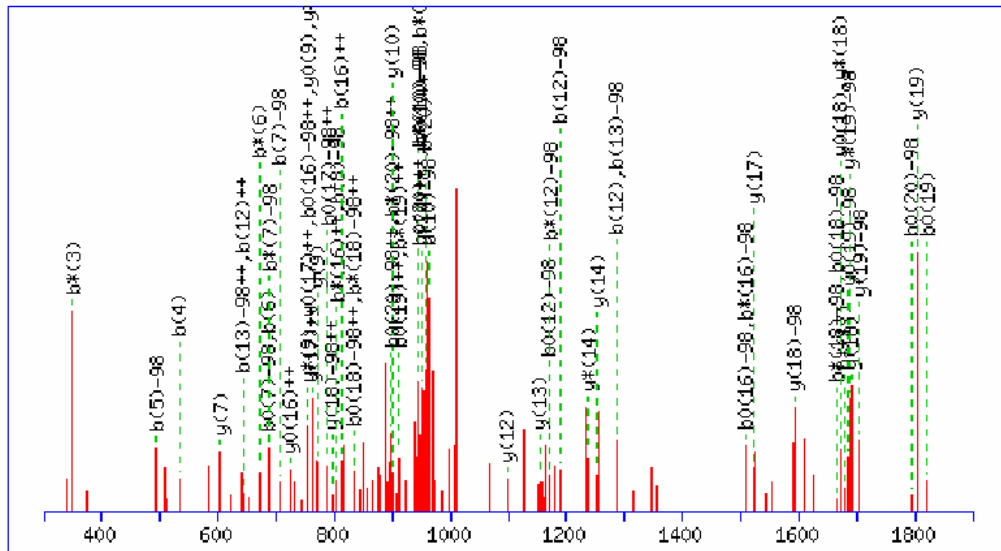

|                        |                                                              |                        |                                                               |                        |                                                               |                         |                                                               |           |                                                 |
|------------------------|--------------------------------------------------------------|------------------------|---------------------------------------------------------------|------------------------|---------------------------------------------------------------|-------------------------|---------------------------------------------------------------|-----------|-------------------------------------------------|
| 74.0600 <sup>+2</sup>  | y <sub>1</sub> <sup>+2</sup>                                 | 402.7218 <sup>+2</sup> | b <sub>8</sub> -H <sub>3</sub> PO <sub>4</sub> <sup>+2</sup>  | 678.3570 <sup>+2</sup> | b <sub>14</sub> -H <sub>3</sub> PO <sub>4</sub> <sup>+2</sup> | 901.4758 <sup>+2</sup>  | y <sub>20</sub> -H <sub>3</sub> PO <sub>4</sub> <sup>+2</sup> | 1453.6835 | b <sub>14</sub>                                 |
| 109.5786 <sup>+2</sup> | y <sub>2</sub> <sup>+2</sup>                                 | 431.2325 <sup>+2</sup> | b <sub>9</sub> -H <sub>3</sub> PO <sub>4</sub> <sup>+2</sup>  | 684.8595 <sup>+2</sup> | y <sub>15</sub> <sup>+2</sup>                                 | 901.9378 <sup>+2</sup>  | y <sub>19</sub> <sup>+2</sup>                                 | 1465.7645 | y <sub>16</sub>                                 |
| 127.5842 <sup>+2</sup> | b <sub>2</sub> <sup>+2</sup>                                 | 433.2405               | y <sub>5</sub>                                                | 688.3178               | b <sub>6</sub>                                                | 902.4132                | b <sub>8</sub>                                                | 1510.705  | b <sub>15</sub>                                 |
| 138.0893 <sup>+2</sup> | y <sub>3</sub> <sup>+2</sup>                                 | 436.2667               | b <sub>4</sub> -H <sub>3</sub> PO <sub>4</sub>                | 691.8268 <sup>+2</sup> | b <sub>13</sub> <sup>+2</sup>                                 | 906.4736 <sup>+2</sup>  | b <sub>20</sub> -H <sub>3</sub> PO <sub>4</sub> <sup>+2</sup> | 1522.786  | y <sub>17</sub>                                 |
| 147.1128               | y <sub>1</sub>                                               | 450.2509 <sup>+2</sup> | y <sub>10</sub> <sup>+2</sup>                                 | 705.3678               | b <sub>7</sub> -H <sub>3</sub> PO <sub>4</sub>                | 919.9435 <sup>+2</sup>  | b <sub>19</sub> <sup>+2</sup>                                 | 1525.8122 | b <sub>16</sub> -H <sub>3</sub> PO <sub>4</sub> |
| 181.6053 <sup>+2</sup> | y <sub>4</sub> <sup>+2</sup>                                 | 451.7102 <sup>+2</sup> | b <sub>8</sub> <sup>+2</sup>                                  | 706.8677 <sup>+2</sup> | b <sub>15</sub> -H <sub>3</sub> PO <sub>4</sub> <sup>+2</sup> | 950.4642 <sup>+2</sup>  | y <sub>20</sub> <sup>+2</sup>                                 | 1591.8075 | y <sub>18</sub> -H <sub>3</sub> PO <sub>4</sub> |
| 184.1262 <sup>+2</sup> | b <sub>3</sub> <sup>+2</sup>                                 | 480.2209 <sup>+2</sup> | b <sub>9</sub> <sup>+2</sup>                                  | 727.3454 <sup>+2</sup> | b <sub>14</sub> <sup>+2</sup>                                 | 955.4620 <sup>+2</sup>  | b <sub>20</sub> <sup>+2</sup>                                 | 1596.8493 | b <sub>17</sub> -H <sub>3</sub> PO <sub>4</sub> |
| 217.1239 <sup>+2</sup> | y <sub>5</sub> <sup>+2</sup>                                 | 481.7563 <sup>+2</sup> | b <sub>10</sub> -H <sub>3</sub> PO <sub>4</sub> <sup>+2</sup> | 733.3859 <sup>+2</sup> | y <sub>16</sub> <sup>+2</sup>                                 | 959.4346                | b <sub>9</sub>                                                | 1623.789  | b <sub>16</sub>                                 |
| 218.1499               | y <sub>2</sub>                                               | 493.2881               | b <sub>5</sub> -H <sub>3</sub> PO <sub>4</sub>                | 755.8561 <sup>+2</sup> | b <sub>15</sub> <sup>+2</sup>                                 | 962.5054                | b <sub>10</sub> -H <sub>3</sub> PO <sub>4</sub>               | 1683.8813 | b <sub>18</sub> -H <sub>3</sub> PO <sub>4</sub> |
| 218.6370 <sup>+2</sup> | b <sub>4</sub> -H <sub>3</sub> PO <sub>4</sub> <sup>+2</sup> | 498.7773 <sup>+2</sup> | y <sub>11</sub> <sup>+2</sup>                                 | 761.8966 <sup>+2</sup> | y <sub>17</sub> <sup>+2</sup>                                 | 979.5263 <sup>+2</sup>  | MH-H <sub>3</sub> PO <sub>4</sub> <sup>+2</sup>               | 1689.7844 | y <sub>18</sub>                                 |
| 247.1477 <sup>+2</sup> | b <sub>5</sub> -H <sub>3</sub> PO <sub>4</sub> <sup>+2</sup> | 530.2827 <sup>+2</sup> | b <sub>11</sub> -H <sub>3</sub> PO <sub>4</sub> <sup>+2</sup> | 763.4097 <sup>+2</sup> | b <sub>16</sub> -H <sub>3</sub> PO <sub>4</sub> <sup>+2</sup> | 996.5473                | y <sub>11</sub>                                               | 1694.8262 | b <sub>17</sub>                                 |
| 254.1612               | b <sub>2</sub>                                               | 530.7448 <sup>+2</sup> | b <sub>10</sub> <sup>+2</sup>                                 | 771.4359               | y <sub>9</sub>                                                | 1028.5148 <sup>+2</sup> | MH <sup>+2</sup>                                              | 1704.8915 | y <sub>19</sub> -H <sub>3</sub> PO <sub>4</sub> |
| 267.6254 <sup>+2</sup> | b <sub>4</sub> <sup>+2</sup>                                 | 534.2436               | b <sub>4</sub>                                                | 796.4074 <sup>+2</sup> | y <sub>18</sub> -H <sub>3</sub> PO <sub>4</sub> <sup>+2</sup> | 1059.5582               | b <sub>11</sub> -H <sub>3</sub> PO <sub>4</sub>               | 1740.9028 | b <sub>19</sub> -H <sub>3</sub> PO <sub>4</sub> |
| 273.6659 <sup>+2</sup> | y <sub>6</sub> <sup>+2</sup>                                 | 546.3246               | y <sub>6</sub>                                                | 798.9283 <sup>+2</sup> | b <sub>17</sub> -H <sub>3</sub> PO <sub>4</sub> <sup>+2</sup> | 1060.4823               | b <sub>10</sub>                                               | 1781.8582 | b <sub>18</sub>                                 |
| 275.1714               | y <sub>3</sub>                                               | 549.3011 <sup>+2</sup> | y <sub>12</sub> <sup>+2</sup>                                 | 803.3447               | b <sub>7</sub>                                                | 1097.5949               | y <sub>12</sub>                                               | 1801.9443 | y <sub>20</sub> -H <sub>3</sub> PO <sub>4</sub> |
| 295.6741 <sup>+2</sup> | b <sub>6</sub> -H <sub>3</sub> PO <sub>4</sub> <sup>+2</sup> | 577.8118 <sup>+2</sup> | y <sub>13</sub> <sup>+2</sup>                                 | 804.4363               | b <sub>8</sub> -H <sub>3</sub> PO <sub>4</sub>                | 1154.6164               | y <sub>13</sub>                                               | 1802.8684 | y <sub>19</sub>                                 |
| 296.1362 <sup>+2</sup> | b <sub>5</sub> <sup>+2</sup>                                 | 579.2712 <sup>+2</sup> | b <sub>11</sub> <sup>+2</sup>                                 | 812.3982 <sup>+2</sup> | b <sub>16</sub> <sup>+2</sup>                                 | 1157.5351               | b <sub>11</sub>                                               | 1811.9399 | b <sub>20</sub> -H <sub>3</sub> PO <sub>4</sub> |
| 302.1767 <sup>+2</sup> | y <sub>7</sub> <sup>+2</sup>                                 | 590.3409               | b <sub>6</sub> -H <sub>3</sub> PO <sub>4</sub>                | 842.4443 <sup>+2</sup> | b <sub>18</sub> -H <sub>3</sub> PO <sub>4</sub> <sup>+2</sup> | 1187.6167               | b <sub>12</sub> -H <sub>3</sub> PO <sub>4</sub>               | 1838.8797 | b <sub>19</sub>                                 |
| 337.6952 <sup>+2</sup> | y <sub>8</sub> <sup>+2</sup>                                 | 591.265                | b <sub>5</sub>                                                | 845.3958 <sup>+2</sup> | y <sub>18</sub> <sup>+2</sup>                                 | 1253.6848               | y <sub>14</sub>                                               | 1899.9212 | y <sub>20</sub>                                 |
| 344.6625 <sup>+2</sup> | b <sub>6</sub> <sup>+2</sup>                                 | 594.3120 <sup>+2</sup> | b <sub>12</sub> -H <sub>3</sub> PO <sub>4</sub> <sup>+2</sup> | 847.9167 <sup>+2</sup> | b <sub>17</sub> <sup>+2</sup>                                 | 1284.6695               | b <sub>13</sub> -H <sub>3</sub> PO <sub>4</sub>               | 1909.9168 | b <sub>20</sub>                                 |
| 353.1876 <sup>+2</sup> | b <sub>7</sub> -H <sub>3</sub> PO <sub>4</sub> <sup>+2</sup> | 603.3461               | y <sub>7</sub>                                                | 852.9494 <sup>+2</sup> | y <sub>19</sub> -H <sub>3</sub> PO <sub>4</sub> <sup>+2</sup> | 1285.5936               | b <sub>12</sub>                                               | 1958.0454 | MH-H <sub>3</sub> PO <sub>4</sub>               |
| 362.2034               | y <sub>4</sub>                                               | 627.3461 <sup>+2</sup> | y <sub>14</sub> <sup>+2</sup>                                 | 861.4577               | b <sub>9</sub> -H <sub>3</sub> PO <sub>4</sub>                | 1355.7066               | b <sub>14</sub> -H <sub>3</sub> PO <sub>4</sub>               | 2056.0223 | MH                                              |
| 367.2452               | b <sub>3</sub>                                               | 642.8384 <sup>+2</sup> | b <sub>13</sub> -H <sub>3</sub> PO <sub>4</sub> <sup>+2</sup> | 870.9550 <sup>+2</sup> | b <sub>19</sub> -H <sub>3</sub> PO <sub>4</sub> <sup>+2</sup> | 1368.7118               | y <sub>15</sub>                                               |           |                                                 |
| 386.2216 <sup>+2</sup> | y <sub>9</sub> <sup>+2</sup>                                 | 643.3005 <sup>+2</sup> | b <sub>12</sub> <sup>+2</sup>                                 | 891.4327 <sup>+2</sup> | b <sub>18</sub> <sup>+2</sup>                                 | 1382.6464               | b <sub>13</sub>                                               |           |                                                 |
| 402.1760 <sup>+2</sup> | b <sub>7</sub> <sup>+2</sup>                                 | 674.3832               | y <sub>8</sub>                                                | 899.4945               | y <sub>10</sub>                                               | 1412.7281               | b <sub>15</sub> -H <sub>3</sub> PO <sub>4</sub>               |           |                                                 |

MS/MS Fragmentation of DKRPLsGPDVGTGPAGLASGAK  
 Found in IPI00014068, Isoform 1 of Serine/threonine-protein kinase PAK 4

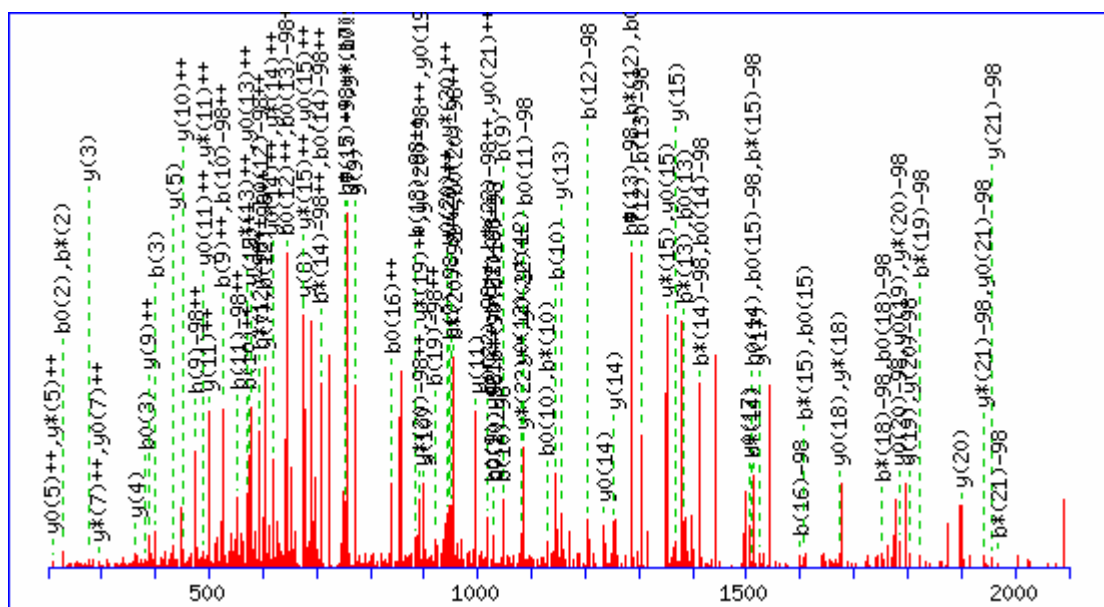

|                        |                    |                        |                       |                         |                       |                         |                       |           |                  |
|------------------------|--------------------|------------------------|-----------------------|-------------------------|-----------------------|-------------------------|-----------------------|-----------|------------------|
| 74.0600 <sup>+2</sup>  | $y_1^{+2}$         | 474.7485 <sup>+2</sup> | $b_9-H_3PO_4^{+2}$    | 771.4359                | $y_9$                 | 1028.0345 <sup>+2</sup> | $b_{22}-H_3PO_4^{+2}$ | 1598.8285 | $b_{16}-H_3PO_4$ |
| 109.5786 <sup>+2</sup> | $y_2^{+2}$         | 497.2831               | $b_4$                 | 777.3655                | $b_6$                 | 1028.5148 <sup>+2</sup> | $y_{21}^{+2}$         | 1625.7683 | $b_{15}$         |
| 122.5682 <sup>+2</sup> | $b_2^{+2}$         | 498.7773 <sup>+2</sup> | $y_{11}^{+2}$         | 796.4074 <sup>+2</sup>  | $y_{18}-H_3PO_4^{+2}$ | 1041.5044 <sup>+2</sup> | $b_{21}^{+2}$         | 1655.85   | $b_{17}-H_3PO_4$ |
| 138.0893 <sup>+2</sup> | $y_3^{+2}$         | 523.7370 <sup>+2</sup> | $b_9^{+2}$            | 799.9179 <sup>+2</sup>  | $b_{16}-H_3PO_4^{+2}$ | 1043.5738 <sup>+2</sup> | $y_{22}-H_3PO_4^{+2}$ | 1689.7844 | $y_{18}$         |
| 147.1128               | $y_1$              | 524.2827 <sup>+2</sup> | $b_{10}-H_3PO_4^{+2}$ | 813.3878 <sup>+2</sup>  | $b_{15}^{+2}$         | 1046.4667               | $b_9$                 | 1696.8054 | $b_{16}$         |
| 181.6053 <sup>+2</sup> | $y_4^{+2}$         | 546.3246               | $y_6$                 | 828.4286 <sup>+2</sup>  | $b_{17}-H_3PO_4^{+2}$ | 1047.5582               | $b_{10}-H_3PO_4$      | 1704.8915 | $y_{19}-H_3PO_4$ |
| 200.6188 <sup>+2</sup> | $b_2^{+2}$         | 549.3011 <sup>+2</sup> | $y_{12}^{+2}$         | 833.4628                | $b_8-H_3PO_4$         | 1077.0230 <sup>+2</sup> | $b_{22}^{+2}$         | 1753.8269 | $b_{17}$         |
| 217.1239 <sup>+2</sup> | $y_5^{+2}$         | 552.7935 <sup>+2</sup> | $b_{11}-H_3PO_4^{+2}$ | 834.3869                | $b_7$                 | 1092.5623 <sup>+2</sup> | $y_{22}^{+2}$         | 1768.9341 | $b_{18}-H_3PO_4$ |
| 218.1499               | $y_2$              | 573.2712 <sup>+2</sup> | $b_{10}^{+2}$         | 845.3958 <sup>+2</sup>  | $y_{18}^{+2}$         | 1097.5949               | $y_{12}$              | 1801.9443 | $y_{20}-H_3PO_4$ |
| 244.1292               | $b_2$              | 577.8118 <sup>+2</sup> | $y_{13}^{+2}$         | 848.9064 <sup>+2</sup>  | $b_{16}^{+2}$         | 1101.0873 <sup>+2</sup> | $MH-H_3PO_4^{+2}$     | 1802.8684 | $y_{19}$         |
| 249.1452 <sup>+2</sup> | $b_4^{+2}$         | 601.7819 <sup>+2</sup> | $b_{11}^{+2}$         | 852.9494 <sup>+2</sup>  | $y_{19}-H_3PO_4^{+2}$ | 1104.5796               | $b_{11}-H_3PO_4$      | 1839.9712 | $b_{19}-H_3PO_4$ |
| 273.6659 <sup>+2</sup> | $y_6^{+2}$         | 603.3173 <sup>+2</sup> | $b_{12}-H_3PO_4^{+2}$ | 877.4171 <sup>+2</sup>  | $b_{17}^{+2}$         | 1145.5351               | $b_{10}$              | 1866.911  | $b_{18}$         |
| 275.1714               | $y_3$              | 603.3461               | $y_7$                 | 884.9707 <sup>+2</sup>  | $b_{18}-H_3PO_4^{+2}$ | 1150.0757 <sup>+2</sup> | $MH^{+2}$             | 1899.9212 | $y_{20}$         |
| 302.1767 <sup>+2</sup> | $y_7^{+2}$         | 610.3671               | $b_5$                 | 899.4945                | $y_{10}$              | 1154.6164               | $y_{13}$              | 1927.0032 | $b_{20}-H_3PO_4$ |
| 305.6872 <sup>+2</sup> | $b_3^{+2}$         | 627.3461 <sup>+2</sup> | $y_{14}^{+2}$         | 901.4758 <sup>+2</sup>  | $y_{20}-H_3PO_4^{+2}$ | 1202.5565               | $b_{11}$              | 1937.9481 | $b_{19}$         |
| 337.6952 <sup>+2</sup> | $y_8^{+2}$         | 651.8437 <sup>+2</sup> | $b_{13}-H_3PO_4^{+2}$ | 901.9378 <sup>+2</sup>  | $y_{19}^{+2}$         | 1205.6273               | $b_{12}-H_3PO_4$      | 1958.0454 | $y_{21}-H_3PO_4$ |
| 340.1979 <sup>+2</sup> | $b_6-H_3PO_4^{+2}$ | 652.3057 <sup>+2</sup> | $b_{12}^{+2}$         | 920.4892 <sup>+2</sup>  | $b_{19}-H_3PO_4^{+2}$ | 1253.6848               | $y_{14}$              | 1984.0247 | $b_{21}-H_3PO_4$ |
| 362.2034               | $y_4$              | 674.3832               | $y_8$                 | 931.4397                | $b_8$                 | 1302.6801               | $b_{13}-H_3PO_4$      | 2024.9801 | $b_{20}$         |
| 368.7087 <sup>+2</sup> | $b_7-H_3PO_4^{+2}$ | 679.3886               | $b_6-H_3PO_4$         | 933.9591 <sup>+2</sup>  | $b_{18}^{+2}$         | 1303.6042               | $b_{12}$              | 2055.0618 | $b_{22}-H_3PO_4$ |
| 386.2216 <sup>+2</sup> | $y_9^{+2}$         | 684.8595 <sup>+2</sup> | $y_{15}^{+2}$         | 948.4898                | $b_9-H_3PO_4$         | 1368.7118               | $y_{15}$              | 2056.0223 | $y_{21}$         |
| 389.1864 <sup>+2</sup> | $b_6^{+2}$         | 700.8321 <sup>+2</sup> | $b_{13}^{+2}$         | 950.4642 <sup>+2</sup>  | $y_{20}^{+2}$         | 1400.657                | $b_{13}$              | 2082.0016 | $b_{21}$         |
| 400.2303               | $b_3$              | 715.8730 <sup>+2</sup> | $b_{14}-H_3PO_4^{+2}$ | 964.0052 <sup>+2</sup>  | $b_{20}-H_3PO_4^{+2}$ | 1430.7387               | $b_{14}-H_3PO_4$      | 2086.1404 | $y_{22}-H_3PO_4$ |
| 417.2350 <sup>+2</sup> | $b_8-H_3PO_4^{+2}$ | 733.3859 <sup>+2</sup> | $y_{16}^{+2}$         | 969.4777 <sup>+2</sup>  | $b_{19}^{+2}$         | 1465.7645               | $y_{16}$              | 2153.0387 | $b_{22}$         |
| 417.6971 <sup>+2</sup> | $b_7^{+2}$         | 736.41                 | $b_7-H_3PO_4$         | 979.5263 <sup>+2</sup>  | $y_{21}-H_3PO_4^{+2}$ | 1522.786                | $y_{17}$              | 2184.1173 | $y_{22}$         |
| 433.2405               | $y_5$              | 761.8966 <sup>+2</sup> | $y_{17}^{+2}$         | 992.5160 <sup>+2</sup>  | $b_{21}-H_3PO_4^{+2}$ | 1527.7914               | $b_{15}-H_3PO_4$      | 2201.1673 | $MH-H_3PO_4$     |
| 450.2509 <sup>+2</sup> | $y_{10}^{+2}$      | 764.3993 <sup>+2</sup> | $b_{15}-H_3PO_4^{+2}$ | 996.5473                | $y_{11}$              | 1528.7155               | $b_{14}$              | 2299.1442 | $MH$             |
| 466.2235 <sup>+2</sup> | $b_8^{+2}$         | 764.8614 <sup>+2</sup> | $b_{14}^{+2}$         | 1012.9937 <sup>+2</sup> | $b_{20}^{+2}$         | 1591.8075               | $y_{18}-H_3PO_4$      |           |                  |



MS/MS Fragmentation of SI<sub>1</sub>LGDSEGPIVATLAQPLR  
 Found in IPI00386732, R34001\_1

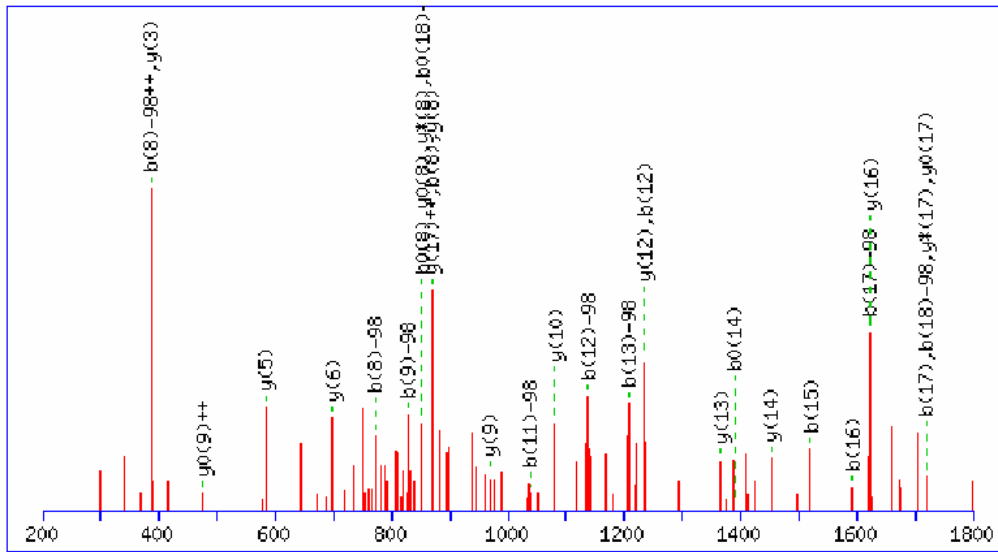

|                        |                                                |                        |                                                |                         |                                                               |           |                                                 |           |                                                 |
|------------------------|------------------------------------------------|------------------------|------------------------------------------------|-------------------------|---------------------------------------------------------------|-----------|-------------------------------------------------|-----------|-------------------------------------------------|
| 88.0631 <sup>+2</sup>  | y <sub>1</sub> <sup>+2</sup>                   | 484.7980 <sup>+2</sup> | y <sub>9</sub> <sup>+2</sup>                   | 812.4387 <sup>+2</sup>  | y <sub>16</sub> <sup>+2</sup>                                 | 1136.4871 | b <sub>11</sub>                                 | 1623.8701 | y <sub>16</sub>                                 |
| 144.6051 <sup>+2</sup> | y <sub>2</sub> <sup>+2</sup>                   | 513.3144               | y <sub>4</sub>                                 | 828.3734                | b <sub>9</sub> -H <sub>3</sub> PO <sub>4</sub>                | 1137.5786 | b <sub>12</sub> -H <sub>3</sub> PO <sub>4</sub> | 1718.8959 | b <sub>18</sub> -H <sub>3</sub> PO <sub>4</sub> |
| 175.119                | y <sub>1</sub>                                 | 538.2273               | b <sub>5</sub>                                 | 868.9807 <sup>+2</sup>  | y <sub>17</sub> <sup>+2</sup>                                 | 1178.7256 | y <sub>11</sub>                                 | 1719.8201 | b <sub>17</sub>                                 |
| 193.1315 <sup>+2</sup> | y <sub>3</sub> <sup>+2</sup>                   | 541.3400 <sup>+2</sup> | y <sub>10</sub> <sup>+2</sup>                  | 869.3288                | b <sub>8</sub>                                                | 1208.6157 | b <sub>13</sub> -H <sub>3</sub> PO <sub>4</sub> | 1736.9541 | y <sub>17</sub>                                 |
| 201.1234               | b <sub>2</sub>                                 | 555.2773               | b <sub>6</sub> -H <sub>3</sub> PO <sub>4</sub> | 869.5203                | y <sub>8</sub>                                                | 1235.5555 | b <sub>12</sub>                                 | 1805.9756 | y <sub>18</sub> -H <sub>3</sub> PO <sub>4</sub> |
| 257.1608 <sup>+2</sup> | y <sub>4</sub> <sup>+2</sup>                   | 584.3515               | y <sub>5</sub>                                 | 903.4914 <sup>+2</sup>  | y <sub>18</sub> -H <sub>3</sub> PO <sub>4</sub> <sup>+2</sup> | 1235.747  | y <sub>12</sub>                                 | 1816.8728 | b <sub>18</sub>                                 |
| 270.1448               | b <sub>3</sub> -H <sub>3</sub> PO <sub>4</sub> | 589.8664 <sup>+2</sup> | y <sub>11</sub> <sup>+2</sup>                  | 925.4262                | b <sub>10</sub> -H <sub>3</sub> PO <sub>4</sub>               | 1306.5926 | b <sub>13</sub>                                 | 1831.98   | b <sub>19</sub> -H <sub>3</sub> PO <sub>4</sub> |
| 288.203                | y <sub>2</sub>                                 | 618.3772 <sup>+2</sup> | y <sub>12</sub> <sup>+2</sup>                  | 926.3503                | b <sub>9</sub>                                                | 1309.6634 | b <sub>14</sub> -H <sub>3</sub> PO <sub>4</sub> | 1903.9525 | y <sub>18</sub>                                 |
| 292.6794 <sup>+2</sup> | y <sub>5</sub> <sup>+2</sup>                   | 642.3093               | b <sub>7</sub> -H <sub>3</sub> PO <sub>4</sub> | 952.4799 <sup>+2</sup>  | y <sub>18</sub> <sup>+2</sup>                                 | 1364.7896 | y <sub>13</sub>                                 | 1919.0597 | y <sub>19</sub> -H <sub>3</sub> PO <sub>4</sub> |
| 349.2214 <sup>+2</sup> | y <sub>6</sub> <sup>+2</sup>                   | 653.2542               | b <sub>6</sub>                                 | 960.0335 <sup>+2</sup>  | y <sub>19</sub> -H <sub>3</sub> PO <sub>4</sub> <sup>+2</sup> | 1407.6403 | b <sub>14</sub>                                 | 1929.9569 | b <sub>19</sub>                                 |
| 368.1217               | b <sub>3</sub>                                 | 682.8985 <sup>+2</sup> | y <sub>13</sub> <sup>+2</sup>                  | 968.5887                | y <sub>9</sub>                                                | 1422.7475 | b <sub>15</sub> -H <sub>3</sub> PO <sub>4</sub> | 2006.0917 | MH-H <sub>3</sub> PO <sub>4</sub>               |
| 383.2289               | b <sub>4</sub> -H <sub>3</sub> PO <sub>4</sub> | 697.4355               | y <sub>6</sub>                                 | 1003.5495 <sup>+2</sup> | MH-H <sub>3</sub> PO <sub>4</sub> <sup>+2</sup>               | 1451.8217 | y <sub>14</sub>                                 | 2017.0365 | y <sub>19</sub>                                 |
| 385.2558               | y <sub>3</sub>                                 | 726.4145 <sup>+2</sup> | y <sub>14</sub> <sup>+2</sup>                  | 1009.0219 <sup>+2</sup> | y <sub>19</sub> <sup>+2</sup>                                 | 1493.7846 | b <sub>16</sub> -H <sub>3</sub> PO <sub>4</sub> | 2104.0686 | MH                                              |
| 399.7452 <sup>+2</sup> | y <sub>7</sub> <sup>+2</sup>                   | 740.2862               | b <sub>7</sub>                                 | 1023.403                | b <sub>10</sub>                                               | 1520.7244 | b <sub>15</sub>                                 |           |                                                 |
| 435.2638 <sup>+2</sup> | y <sub>8</sub> <sup>+2</sup>                   | 771.3519               | b <sub>8</sub> -H <sub>3</sub> PO <sub>4</sub> | 1038.5102               | b <sub>11</sub> -H <sub>3</sub> PO <sub>4</sub>               | 1566.8486 | y <sub>15</sub>                                 |           |                                                 |
| 440.2504               | b <sub>5</sub> -H <sub>3</sub> PO <sub>4</sub> | 783.9279 <sup>+2</sup> | y <sub>15</sub> <sup>+2</sup>                  | 1052.5379 <sup>+2</sup> | MH <sup>+2</sup>                                              | 1591.7615 | b <sub>16</sub>                                 |           |                                                 |
| 481.2058               | b <sub>4</sub>                                 | 798.4832               | y <sub>7</sub>                                 | 1081.6728               | y <sub>10</sub>                                               | 1621.8432 | b <sub>17</sub> -H <sub>3</sub> PO <sub>4</sub> |           |                                                 |

MS/MS Fragmentation of RSsLPNGEGLQLK  
 Found in IPI00736251, PREDICTED: similar to protein phosphatase 1H

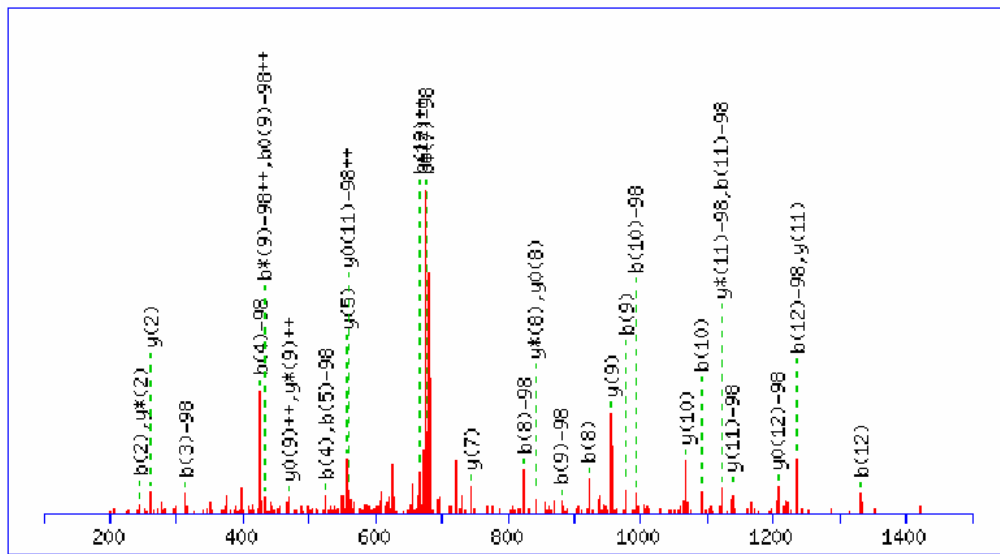

|                        |                                                              |                        |                                                              |                        |                                                               |                        |                                                 |           |                                                 |
|------------------------|--------------------------------------------------------------|------------------------|--------------------------------------------------------------|------------------------|---------------------------------------------------------------|------------------------|-------------------------------------------------|-----------|-------------------------------------------------|
| 74.0600 <sup>+2</sup>  | y <sub>1</sub> <sup>+2</sup>                                 | 313.1619               | b <sub>3</sub> -H <sub>3</sub> PO <sub>4</sub>               | 489.7057 <sup>+2</sup> | b <sub>9</sub> <sup>+2</sup>                                  | 637.3416               | b <sub>6</sub> -H <sub>3</sub> PO <sub>4</sub>  | 978.4041  | b <sub>9</sub>                                  |
| 122.5738 <sup>+2</sup> | b <sub>2</sub> <sup>+2</sup>                                 | 319.1745 <sup>+2</sup> | b <sub>6</sub> -H <sub>3</sub> PO <sub>4</sub> <sup>+2</sup> | 497.2592 <sup>+2</sup> | b <sub>10</sub> -H <sub>3</sub> PO <sub>4</sub> <sup>+2</sup> | 661.8212 <sup>+2</sup> | y <sub>12</sub> <sup>+2</sup>                   | 993.5112  | b <sub>10</sub> -H <sub>3</sub> PO <sub>4</sub> |
| 130.6021 <sup>+2</sup> | y <sub>2</sub> <sup>+2</sup>                                 | 344.2054 <sup>+2</sup> | y <sub>6</sub> <sup>+2</sup>                                 | 501.3395               | y <sub>4</sub>                                                | 666.8190 <sup>+2</sup> | b <sub>12</sub> <sup>+2</sup>                   | 1068.6048 | y <sub>10</sub>                                 |
| 147.1128               | y <sub>1</sub>                                               | 347.6852 <sup>+2</sup> | b <sub>7</sub> -H <sub>3</sub> PO <sub>4</sub> <sup>+2</sup> | 523.2987               | b <sub>5</sub> -H <sub>3</sub> PO <sub>4</sub>                | 687.4036               | y <sub>6</sub>                                  | 1091.4881 | b <sub>10</sub>                                 |
| 157.0846 <sup>+2</sup> | b <sub>3</sub> -H <sub>3</sub> PO <sub>4</sub> <sup>+2</sup> | 368.1629 <sup>+2</sup> | b <sub>6</sub> <sup>+2</sup>                                 | 524.2228               | b <sub>4</sub>                                                | 690.8833 <sup>+2</sup> | MH-H <sub>3</sub> PO <sub>4</sub> <sup>+2</sup> | 1121.5698 | b <sub>11</sub> -H <sub>3</sub> PO <sub>4</sub> |
| 194.6314 <sup>+2</sup> | y <sub>3</sub> <sup>+2</sup>                                 | 372.7162 <sup>+2</sup> | y <sub>7</sub> <sup>+2</sup>                                 | 534.8060 <sup>+2</sup> | y <sub>10</sub> <sup>+2</sup>                                 | 694.3631               | b <sub>7</sub> -H <sub>3</sub> PO <sub>4</sub>  | 1137.6262 | y <sub>11</sub> -H <sub>3</sub> PO <sub>4</sub> |
| 206.0730 <sup>+2</sup> | b <sub>3</sub> <sup>+2</sup>                                 | 388.2554               | y <sub>3</sub>                                               | 546.2477 <sup>+2</sup> | b <sub>10</sub> <sup>+2</sup>                                 | 735.3185               | b <sub>6</sub>                                  | 1219.5467 | b <sub>11</sub>                                 |
| 213.6266 <sup>+2</sup> | b <sub>4</sub> -H <sub>3</sub> PO <sub>4</sub> <sup>+2</sup> | 396.6736 <sup>+2</sup> | b <sub>7</sub> <sup>+2</sup>                                 | 558.361                | y <sub>5</sub>                                                | 739.8718 <sup>+2</sup> | MH <sup>+2</sup>                                | 1224.6583 | y <sub>12</sub> -H <sub>3</sub> PO <sub>4</sub> |
| 244.1404               | b <sub>2</sub>                                               | 411.1388               | b <sub>3</sub>                                               | 561.2885 <sup>+2</sup> | b <sub>11</sub> -H <sub>3</sub> PO <sub>4</sub> <sup>+2</sup> | 744.425                | y <sub>7</sub>                                  | 1234.6539 | b <sub>12</sub> -H <sub>3</sub> PO <sub>4</sub> |
| 251.1734 <sup>+2</sup> | y <sub>4</sub> <sup>+2</sup>                                 | 412.2065 <sup>+2</sup> | b <sub>8</sub> -H <sub>3</sub> PO <sub>4</sub> <sup>+2</sup> | 569.3168 <sup>+2</sup> | y <sub>11</sub> -H <sub>3</sub> PO <sub>4</sub> <sup>+2</sup> | 792.34                 | b <sub>7</sub>                                  | 1235.6031 | y <sub>11</sub>                                 |
| 260.1969               | y <sub>2</sub>                                               | 426.2459               | b <sub>4</sub> -H <sub>3</sub> PO <sub>4</sub>               | 610.2770 <sup>+2</sup> | b <sub>11</sub> <sup>+2</sup>                                 | 823.4057               | b <sub>8</sub> -H <sub>3</sub> PO <sub>4</sub>  | 1322.6352 | y <sub>12</sub>                                 |
| 262.1530 <sup>+2</sup> | b <sub>5</sub> -H <sub>3</sub> PO <sub>4</sub> <sup>+2</sup> | 429.7376 <sup>+2</sup> | y <sub>8</sub> <sup>+2</sup>                                 | 612.8328 <sup>+2</sup> | y <sub>12</sub> -H <sub>3</sub> PO <sub>4</sub> <sup>+2</sup> | 858.468                | y <sub>8</sub>                                  | 1332.6308 | b <sub>12</sub>                                 |
| 262.6151 <sup>+2</sup> | b <sub>4</sub> <sup>+2</sup>                                 | 440.7172 <sup>+2</sup> | b <sub>9</sub> -H <sub>3</sub> PO <sub>4</sub> <sup>+2</sup> | 617.8306 <sup>+2</sup> | b <sub>12</sub> -H <sub>3</sub> PO <sub>4</sub> <sup>+2</sup> | 880.4272               | b <sub>9</sub> -H <sub>3</sub> PO <sub>4</sub>  | 1380.7594 | MH-H <sub>3</sub> PO <sub>4</sub>               |
| 279.6841 <sup>+2</sup> | y <sub>5</sub> <sup>+2</sup>                                 | 461.1949 <sup>+2</sup> | b <sub>8</sub> <sup>+2</sup>                                 | 618.3052 <sup>+2</sup> | y <sub>11</sub> <sup>+2</sup>                                 | 921.3826               | b <sub>8</sub>                                  | 1478.7363 | MH                                              |
| 311.1414 <sup>+2</sup> | b <sub>5</sub> <sup>+2</sup>                                 | 478.2640 <sup>+2</sup> | y <sub>9</sub> <sup>+2</sup>                                 | 621.2756               | b <sub>5</sub>                                                | 955.5207               | y <sub>9</sub>                                  |           |                                                 |

MS/MS Fragmentation of RTEsVPSDINNPVDR  
 Found in IPI00013384, Isoform 2 of Kinase suppressor of ras-1

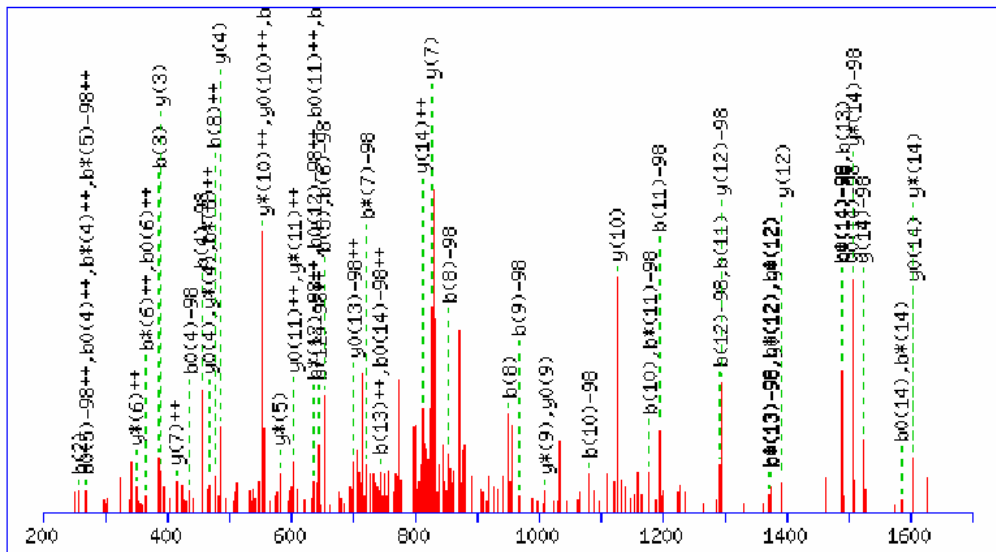

|                        |                                                              |                        |                                                               |                        |                                                               |                        |                                                 |           |                                                 |
|------------------------|--------------------------------------------------------------|------------------------|---------------------------------------------------------------|------------------------|---------------------------------------------------------------|------------------------|-------------------------------------------------|-----------|-------------------------------------------------|
| 88.0631 <sup>+2</sup>  | y <sub>1</sub> <sup>+2</sup>                                 | 387.1987               | b <sub>3</sub>                                                | 600.31                 | y <sub>5</sub>                                                | 802.8512 <sup>+2</sup> | b <sub>14</sub> <sup>+2</sup>                   | 1293.5471 | b <sub>11</sub>                                 |
| 129.5817 <sup>+2</sup> | b <sub>2</sub> <sup>+2</sup>                                 | 389.2143               | y <sub>3</sub>                                                | 613.3122 <sup>+2</sup> | y <sub>11</sub> <sup>+2</sup>                                 | 811.8565 <sup>+2</sup> | y <sub>14</sub> <sup>+2</sup>                   | 1294.6386 | y <sub>12</sub> -H <sub>3</sub> PO <sub>4</sub> |
| 145.5766 <sup>+2</sup> | y <sub>2</sub> <sup>+2</sup>                                 | 414.2221 <sup>+2</sup> | y <sub>7</sub> <sup>+2</sup>                                  | 646.8151 <sup>+2</sup> | b <sub>12</sub> -H <sub>3</sub> PO <sub>4</sub> <sup>+2</sup> | 827.437                | y <sub>7</sub>                                  | 1390.5998 | b <sub>12</sub>                                 |
| 175.119                | y <sub>1</sub>                                               | 419.1788 <sup>+2</sup> | b <sub>7</sub> <sup>+2</sup>                                  | 647.2772 <sup>+2</sup> | b <sub>11</sub> <sup>+2</sup>                                 | 837.3502               | b <sub>7</sub>                                  | 1391.6914 | b <sub>13</sub> -H <sub>3</sub> PO <sub>4</sub> |
| 194.1030 <sup>+2</sup> | b <sub>3</sub> <sup>+2</sup>                                 | 427.7038 <sup>+2</sup> | b <sub>8</sub> -H <sub>3</sub> PO <sub>4</sub> <sup>+2</sup>  | 647.8229 <sup>+2</sup> | y <sub>12</sub> -H <sub>3</sub> PO <sub>4</sub> <sup>+2</sup> | 840.9186 <sup>+2</sup> | MH-H <sub>3</sub> PO <sub>4</sub> <sup>+2</sup> | 1392.6155 | y <sub>12</sub>                                 |
| 195.1108 <sup>+2</sup> | y <sub>3</sub> <sup>+2</sup>                                 | 456.2201               | b <sub>4</sub> -H <sub>3</sub> PO <sub>4</sub>                | 652.3413               | b <sub>6</sub> -H <sub>3</sub> PO <sub>4</sub>                | 854.4003               | b <sub>8</sub> -H <sub>3</sub> PO <sub>4</sub>  | 1423.6812 | y <sub>13</sub> -H <sub>3</sub> PO <sub>4</sub> |
| 228.6137 <sup>+2</sup> | b <sub>4</sub> -H <sub>3</sub> PO <sub>4</sub> <sup>+2</sup> | 471.7356 <sup>+2</sup> | y <sub>8</sub> <sup>+2</sup>                                  | 653.2654               | b <sub>5</sub>                                                | 889.9071 <sup>+2</sup> | MH <sup>+2</sup>                                | 1489.6683 | b <sub>13</sub>                                 |
| 243.6372 <sup>+2</sup> | y <sub>4</sub> <sup>+2</sup>                                 | 476.6922 <sup>+2</sup> | b <sub>8</sub> <sup>+2</sup>                                  | 695.8036 <sup>+2</sup> | b <sub>12</sub> <sup>+2</sup>                                 | 942.4639               | y <sub>8</sub>                                  | 1506.7183 | b <sub>14</sub> -H <sub>3</sub> PO <sub>4</sub> |
| 258.1561               | b <sub>2</sub>                                               | 484.2458 <sup>+2</sup> | b <sub>9</sub> -H <sub>3</sub> PO <sub>4</sub> <sup>+2</sup>  | 696.3493 <sup>+2</sup> | b <sub>13</sub> -H <sub>3</sub> PO <sub>4</sub> <sup>+2</sup> | 952.3772               | b <sub>8</sub>                                  | 1521.6581 | y <sub>13</sub>                                 |
| 277.6021 <sup>+2</sup> | b <sub>4</sub> <sup>+2</sup>                                 | 486.2671               | y <sub>4</sub>                                                | 696.8114 <sup>+2</sup> | y <sub>12</sub> <sup>+2</sup>                                 | 967.4843               | b <sub>9</sub> -H <sub>3</sub> PO <sub>4</sub>  | 1524.7289 | y <sub>14</sub> -H <sub>3</sub> PO <sub>4</sub> |
| 278.1479 <sup>+2</sup> | b <sub>5</sub> -H <sub>3</sub> PO <sub>4</sub> <sup>+2</sup> | 515.2516 <sup>+2</sup> | y <sub>9</sub> <sup>+2</sup>                                  | 712.3442 <sup>+2</sup> | y <sub>13</sub> -H <sub>3</sub> PO <sub>4</sub> <sup>+2</sup> | 1029.496               | y <sub>9</sub>                                  | 1604.6952 | b <sub>14</sub>                                 |
| 290.1459               | y <sub>2</sub>                                               | 533.2343 <sup>+2</sup> | b <sub>9</sub> <sup>+2</sup>                                  | 714.3529               | y <sub>6</sub>                                                | 1065.4612              | b <sub>9</sub>                                  | 1622.7058 | y <sub>14</sub>                                 |
| 300.6586 <sup>+2</sup> | y <sub>5</sub> <sup>+2</sup>                                 | 541.2673 <sup>+2</sup> | b <sub>10</sub> -H <sub>3</sub> PO <sub>4</sub> <sup>+2</sup> | 739.3733               | b <sub>7</sub> -H <sub>3</sub> PO <sub>4</sub>                | 1081.5273              | b <sub>10</sub> -H <sub>3</sub> PO <sub>4</sub> | 1680.83   | MH-H <sub>3</sub> PO <sub>4</sub>               |
| 326.6743 <sup>+2</sup> | b <sub>6</sub> -H <sub>3</sub> PO <sub>4</sub> <sup>+2</sup> | 554.197                | b <sub>4</sub>                                                | 745.3378 <sup>+2</sup> | b <sub>13</sub> <sup>+2</sup>                                 | 1126.5487              | y <sub>10</sub>                                 | 1778.8069 | MH                                              |
| 327.1364 <sup>+2</sup> | b <sub>2</sub> <sup>+2</sup>                                 | 555.2885               | b <sub>5</sub> -H <sub>3</sub> PO <sub>4</sub>                | 750.3182               | b <sub>6</sub>                                                | 1179.5042              | b <sub>10</sub>                                 |           |                                                 |
| 357.6801 <sup>+2</sup> | y <sub>6</sub> <sup>+2</sup>                                 | 563.7780 <sup>+2</sup> | y <sub>10</sub> <sup>+2</sup>                                 | 753.8628 <sup>+2</sup> | b <sub>14</sub> -H <sub>3</sub> PO <sub>4</sub> <sup>+2</sup> | 1195.5702              | b <sub>11</sub> -H <sub>3</sub> PO <sub>4</sub> |           |                                                 |
| 370.1903 <sup>+2</sup> | b <sub>7</sub> -H <sub>3</sub> PO <sub>4</sub> <sup>+2</sup> | 590.2557 <sup>+2</sup> | b <sub>10</sub> <sup>+2</sup>                                 | 761.3327 <sup>+2</sup> | y <sub>13</sub> <sup>+2</sup>                                 | 1225.6171              | y <sub>11</sub>                                 |           |                                                 |
| 375.6627 <sup>+2</sup> | b <sub>6</sub> <sup>+2</sup>                                 | 598.2887 <sup>+2</sup> | b <sub>11</sub> -H <sub>3</sub> PO <sub>4</sub> <sup>+2</sup> | 762.8681 <sup>+2</sup> | y <sub>14</sub> -H <sub>3</sub> PO <sub>4</sub> <sup>+2</sup> | 1292.623               | b <sub>12</sub> -H <sub>3</sub> PO <sub>4</sub> |           |                                                 |

MS/MS Fragmentation of WPGSPtSR  
 Found in IPI00012856, Forkhead box protein O3A

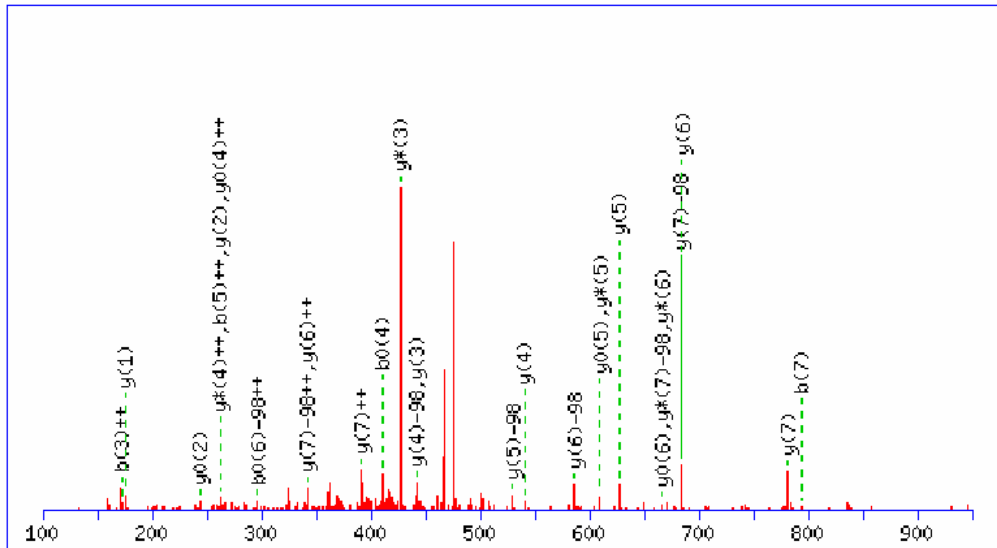

|                        |                                                              |                        |                                                              |                        |                                                 |          |                                                |          |                                   |
|------------------------|--------------------------------------------------------------|------------------------|--------------------------------------------------------------|------------------------|-------------------------------------------------|----------|------------------------------------------------|----------|-----------------------------------|
| 88.0631 <sup>+2</sup>  | y <sub>1</sub> <sup>+2</sup>                                 | 270.6125 <sup>+2</sup> | y <sub>4</sub> <sup>+2</sup>                                 | 391.1656 <sup>+2</sup> | y <sub>7</sub> <sup>+2</sup>                    | 540.2178 | y <sub>4</sub>                                 | 781.324  | y <sub>7</sub>                    |
| 131.5791 <sup>+2</sup> | y <sub>2</sub> <sup>+2</sup>                                 | 284.1394               | b <sub>2</sub>                                               | 428.1928               | b <sub>4</sub>                                  | 586.2944 | y <sub>6</sub> -H <sub>3</sub> PO <sub>4</sub> | 793.2916 | b <sub>7</sub>                    |
| 173.0977 <sup>+2</sup> | y <sub>3</sub> -H <sub>3</sub> PO <sub>4</sub> <sup>+2</sup> | 293.6508 <sup>+2</sup> | y <sub>6</sub> -H <sub>3</sub> PO <sub>4</sub> <sup>+2</sup> | 435.2169 <sup>+2</sup> | MH-H <sub>3</sub> PO <sub>4</sub> <sup>+2</sup> | 608.2827 | b <sub>6</sub> -H <sub>3</sub> PO <sub>4</sub> | 869.4264 | MH-H <sub>3</sub> PO <sub>4</sub> |
| 175.119                | y <sub>1</sub>                                               | 314.1285 <sup>+2</sup> | y <sub>5</sub> <sup>+2</sup>                                 | 442.2409               | y <sub>4</sub> -H <sub>3</sub> PO <sub>4</sub>  | 627.2498 | y <sub>5</sub>                                 | 967.4033 | MH                                |
| 221.6241 <sup>+2</sup> | y <sub>4</sub> -H <sub>3</sub> PO <sub>4</sub> <sup>+2</sup> | 341.1608               | b <sub>3</sub>                                               | 443.165                | y <sub>3</sub>                                  | 683.3471 | y <sub>7</sub> -H <sub>3</sub> PO <sub>4</sub> |          |                                   |
| 222.0861 <sup>+2</sup> | y <sub>3</sub> <sup>+2</sup>                                 | 342.1772 <sup>+2</sup> | y <sub>7</sub> -H <sub>3</sub> PO <sub>4</sub> <sup>+2</sup> | 484.2053 <sup>+2</sup> | MH <sup>+2</sup>                                | 684.2712 | y <sub>6</sub>                                 |          |                                   |
| 262.151                | y <sub>2</sub>                                               | 342.6393 <sup>+2</sup> | y <sub>6</sub> <sup>+2</sup>                                 | 525.2456               | b <sub>5</sub>                                  | 695.3148 | b <sub>7</sub> -H <sub>3</sub> PO <sub>4</sub> |          |                                   |
| 265.1401 <sup>+2</sup> | y <sub>5</sub> -H <sub>3</sub> PO <sub>4</sub> <sup>+2</sup> | 345.1881               | y <sub>3</sub> -H <sub>3</sub> PO <sub>4</sub>               | 529.2729               | y <sub>5</sub> -H <sub>3</sub> PO <sub>4</sub>  | 706.2596 | b <sub>6</sub>                                 |          |                                   |

MS/MS Fragmentation of AGsAmAIGGGGSGTLGSGLLLEDSAR  
 Found in IPI00012856, Forkhead box protein O3A

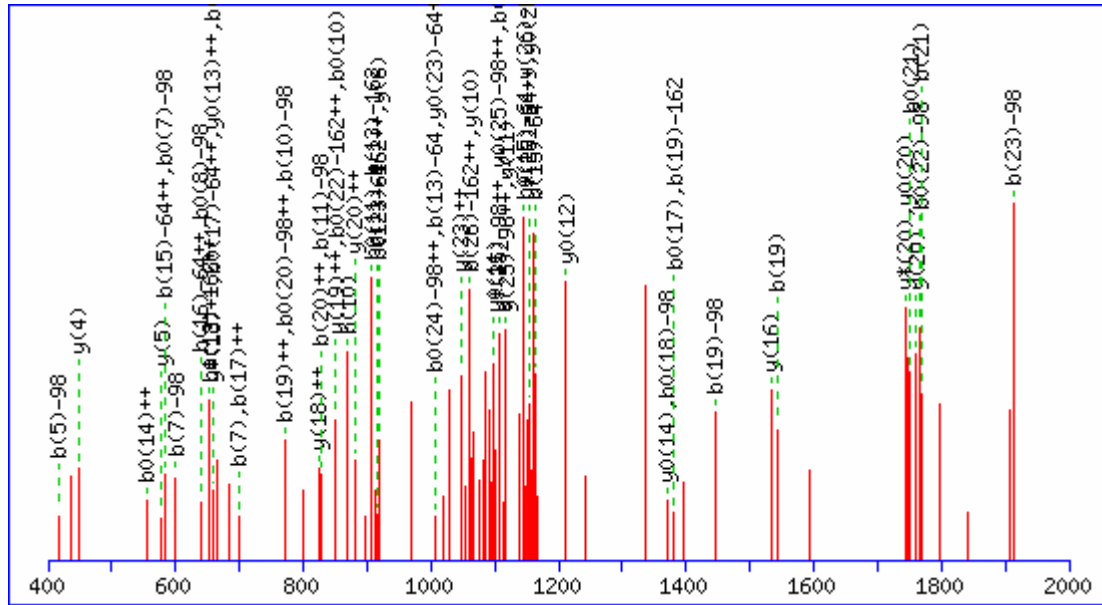

|                        |                                                |                        |                                                 |                         |                                                               |                         |                                                 |           |                                                 |
|------------------------|------------------------------------------------|------------------------|-------------------------------------------------|-------------------------|---------------------------------------------------------------|-------------------------|-------------------------------------------------|-----------|-------------------------------------------------|
| 88.0631 <sup>+2</sup>  | y <sub>1</sub> <sup>+2</sup>                   | 559.2960 <sup>+2</sup> | y <sub>11</sub> <sup>+2</sup>                   | 880.9423 <sup>+2</sup>  | y <sub>20</sub> <sup>+2</sup>                                 | 1228.4664               | b <sub>15</sub>                                 | 1768.7935 | b <sub>21</sub>                                 |
| 123.5817 <sup>+2</sup> | y <sub>2</sub> <sup>+2</sup>                   | 577.2576               | y <sub>5</sub>                                  | 885.3883                | b <sub>12</sub> -H <sub>3</sub> PO <sub>4</sub>               | 1229.5676 <sup>+2</sup> | MH <sup>+2</sup>                                | 1783.9007 | b <sub>22</sub> -H <sub>3</sub> PO <sub>4</sub> |
| 129.0659               | b <sub>2</sub>                                 | 585.1738               | b <sub>6</sub>                                  | 916.5098                | y <sub>8</sub>                                                | 1230.6688               | y <sub>12</sub>                                 | 1873.9614 | y <sub>21</sub>                                 |
| 167.0977 <sup>+2</sup> | y <sub>3</sub> <sup>+2</sup>                   | 600.281                | b <sub>7</sub> -H <sub>3</sub> PO <sub>4</sub>  | 926.3438                | b <sub>11</sub>                                               | 1243.5736               | b <sub>16</sub> -H <sub>3</sub> PO <sub>4</sub> | 1881.8776 | b <sub>22</sub>                                 |
| 175.119                | y <sub>1</sub>                                 | 615.8381 <sup>+2</sup> | y <sub>12</sub> <sup>+2</sup>                   | 937.4843 <sup>+2</sup>  | y <sub>21</sub> <sup>+2</sup>                                 | 1300.595                | b <sub>17</sub> -H <sub>3</sub> PO <sub>4</sub> | 1912.9433 | b <sub>23</sub> -H <sub>3</sub> PO <sub>4</sub> |
| 198.0873               | b <sub>3</sub> -H <sub>3</sub> PO <sub>4</sub> | 657.3025               | b <sub>8</sub> -H <sub>3</sub> PO <sub>4</sub>  | 972.4204                | b <sub>13</sub> -H <sub>3</sub> PO <sub>4</sub>               | 1331.7165               | y <sub>13</sub>                                 | 1944.9985 | y <sub>22</sub>                                 |
| 224.6112 <sup>+2</sup> | y <sub>4</sub> <sup>+2</sup>                   | 666.3619 <sup>+2</sup> | y <sub>13</sub> <sup>+2</sup>                   | 973.0029 <sup>+2</sup>  | y <sub>22</sub> <sup>+2</sup>                                 | 1341.5505               | b <sub>16</sub>                                 | 2010.9202 | b <sub>23</sub>                                 |
| 246.1561               | y <sub>2</sub>                                 | 690.3417               | y <sub>6</sub>                                  | 973.5313                | y <sub>9</sub>                                                | 1387.6271               | b <sub>18</sub> -H <sub>3</sub> PO <sub>4</sub> | 2027.9702 | b <sub>24</sub> -H <sub>3</sub> PO <sub>4</sub> |
| 269.1244               | b <sub>4</sub> -H <sub>3</sub> PO <sub>4</sub> | 694.8726 <sup>+2</sup> | y <sub>14</sub> <sup>+2</sup>                   | 983.3652                | b <sub>12</sub>                                               | 1388.738                | y <sub>14</sub>                                 | 2092.0339 | y <sub>23</sub>                                 |
| 289.1325 <sup>+2</sup> | y <sub>5</sub> <sup>+2</sup>                   | 698.2579               | b <sub>7</sub>                                  | 1029.4418               | b <sub>14</sub> -H <sub>3</sub> PO <sub>4</sub>               | 1398.5719               | b <sub>17</sub>                                 | 2115.0023 | b <sub>25</sub> -H <sub>3</sub> PO <sub>4</sub> |
| 296.0642               | b <sub>3</sub>                                 | 714.3239               | b <sub>9</sub> -H <sub>3</sub> PO <sub>4</sub>  | 1046.5206 <sup>+2</sup> | y <sub>23</sub> <sup>+2</sup>                                 | 1444.6485               | b <sub>19</sub> -H <sub>3</sub> PO <sub>4</sub> | 2125.9471 | b <sub>24</sub>                                 |
| 333.1881               | y <sub>3</sub>                                 | 738.3886 <sup>+2</sup> | y <sub>15</sub> <sup>+2</sup>                   | 1060.5633               | y <sub>10</sub>                                               | 1475.77                 | y <sub>15</sub>                                 | 2163.071  | y <sub>24</sub>                                 |
| 345.6745 <sup>+2</sup> | y <sub>6</sub> <sup>+2</sup>                   | 755.2794               | b <sub>8</sub>                                  | 1070.3973               | b <sub>13</sub>                                               | 1485.6039               | b <sub>18</sub>                                 | 2186.0394 | b <sub>26</sub> -H <sub>3</sub> PO <sub>4</sub> |
| 367.1013               | b <sub>4</sub>                                 | 766.8994 <sup>+2</sup> | y <sub>16</sub> <sup>+2</sup>                   | 1082.0391 <sup>+2</sup> | y <sub>24</sub> <sup>+2</sup>                                 | 1532.7915               | y <sub>16</sub>                                 | 2212.9792 | b <sub>25</sub>                                 |
| 402.2165 <sup>+2</sup> | y <sub>7</sub> <sup>+2</sup>                   | 771.3454               | b <sub>10</sub> -H <sub>3</sub> PO <sub>4</sub> | 1116.5499 <sup>+2</sup> | y <sub>25</sub> -H <sub>3</sub> PO <sub>4</sub> <sup>+2</sup> | 1542.6254               | b <sub>19</sub>                                 | 2232.0925 | y <sub>25</sub> -H <sub>3</sub> PO <sub>4</sub> |
| 416.1598               | b <sub>5</sub> -H <sub>3</sub> PO <sub>4</sub> | 795.4101 <sup>+2</sup> | y <sub>17</sub> <sup>+2</sup>                   | 1117.5848               | y <sub>11</sub>                                               | 1557.7326               | b <sub>20</sub> -H <sub>3</sub> PO <sub>4</sub> | 2284.0163 | b <sub>26</sub>                                 |
| 448.215                | y <sub>4</sub>                                 | 803.4258               | y <sub>7</sub>                                  | 1127.4187               | b <sub>14</sub>                                               | 1589.8129               | y <sub>17</sub>                                 | 2289.1139 | y <sub>26</sub> -H <sub>3</sub> PO <sub>4</sub> |
| 458.7585 <sup>+2</sup> | y <sub>8</sub> <sup>+2</sup>                   | 812.3008               | b <sub>9</sub>                                  | 1130.4895               | b <sub>15</sub> -H <sub>3</sub> PO <sub>4</sub>               | 1646.8344               | y <sub>18</sub>                                 | 2330.0694 | y <sub>25</sub>                                 |
| 487.1969               | b <sub>6</sub> -H <sub>3</sub> PO <sub>4</sub> | 823.9208 <sup>+2</sup> | y <sub>18</sub> <sup>+2</sup>                   | 1145.0606 <sup>+2</sup> | y <sub>26</sub> -H <sub>3</sub> PO <sub>4</sub> <sup>+2</sup> | 1655.7095               | b <sub>20</sub>                                 | 2360.1511 | MH-H <sub>3</sub> PO <sub>4</sub>               |
| 487.2693 <sup>+2</sup> | y <sub>9</sub> <sup>+2</sup>                   | 828.3669               | b <sub>11</sub> -H <sub>3</sub> PO <sub>4</sub> | 1165.5383 <sup>+2</sup> | y <sub>25</sub> <sup>+2</sup>                                 | 1670.8166               | b <sub>21</sub> -H <sub>3</sub> PO <sub>4</sub> | 2387.0908 | y <sub>26</sub>                                 |
| 514.1367               | b <sub>5</sub>                                 | 852.4316 <sup>+2</sup> | y <sub>19</sub> <sup>+2</sup>                   | 1180.5792 <sup>+2</sup> | MH-H <sub>3</sub> PO <sub>4</sub> <sup>+2</sup>               | 1703.8559               | y <sub>19</sub>                                 | 2458.128  | MH                                              |
| 530.7853 <sup>+2</sup> | y <sub>10</sub> <sup>+2</sup>                  | 869.3223               | b <sub>10</sub>                                 | 1194.0491 <sup>+2</sup> | y <sub>26</sub> <sup>+2</sup>                                 | 1760.8773               | y <sub>20</sub>                                 |           |                                                 |

MS/MS Fragmentation of RVsQDLEVEKPDASPTSLQLR  
 Found in IPI00304817, SAM and SH3 domain-containing protein 1

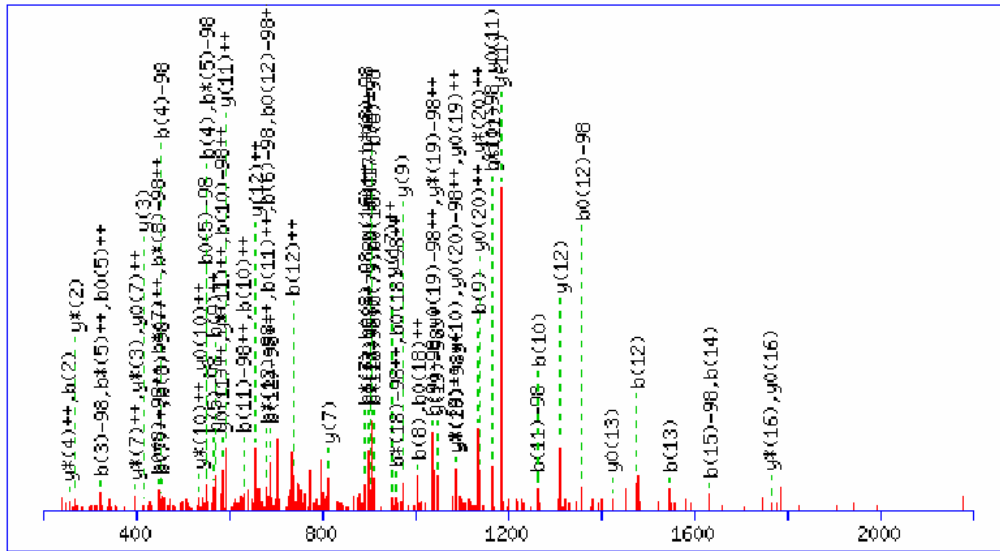

|                        |                                                              |                        |                                                               |                         |                                                               |                         |                                                               |           |                                                 |
|------------------------|--------------------------------------------------------------|------------------------|---------------------------------------------------------------|-------------------------|---------------------------------------------------------------|-------------------------|---------------------------------------------------------------|-----------|-------------------------------------------------|
| 88.0631 <sup>+2</sup>  | y <sub>1</sub> <sup>+2</sup>                                 | 454.6973 <sup>+2</sup> | b <sub>7</sub> <sup>+2</sup>                                  | 770.9201 <sup>+2</sup>  | y <sub>14</sub> <sup>+2</sup>                                 | 1048.0369 <sup>+2</sup> | y <sub>19</sub> -H <sub>3</sub> PO <sub>4</sub> <sup>+2</sup> | 1634.7422 | b <sub>14</sub>                                 |
| 128.5920 <sup>+2</sup> | b <sub>2</sub> <sup>+2</sup>                                 | 455.2431 <sup>+2</sup> | b <sub>8</sub> -H <sub>3</sub> PO <sub>4</sub> <sup>+2</sup>  | 774.3587 <sup>+2</sup>  | b <sub>13</sub> <sup>+2</sup>                                 | 1081.0123 <sup>+2</sup> | b <sub>19</sub> <sup>+2</sup>                                 | 1669.8755 | y <sub>15</sub>                                 |
| 144.6051 <sup>+2</sup> | y <sub>2</sub> <sup>+2</sup>                                 | 486.7773 <sup>+2</sup> | y <sub>9</sub> <sup>+2</sup>                                  | 779.3447                | b <sub>6</sub>                                                | 1087.5742               | y <sub>10</sub>                                               | 1731.7949 | b <sub>15</sub>                                 |
| 163.1028 <sup>+2</sup> | b <sub>3</sub> -H <sub>3</sub> PO <sub>4</sub> <sup>+2</sup> | 504.2315 <sup>+2</sup> | b <sub>8</sub> <sup>+2</sup>                                  | 810.4104                | b <sub>7</sub> -H <sub>3</sub> PO <sub>4</sub>                | 1088.5659 <sup>+2</sup> | b <sub>20</sub> -H <sub>3</sub> PO <sub>4</sub> <sup>+2</sup> | 1734.8657 | b <sub>16</sub> -H <sub>3</sub> PO <sub>4</sub> |
| 175.119                | y <sub>1</sub>                                               | 519.7644 <sup>+2</sup> | b <sub>9</sub> -H <sub>3</sub> PO <sub>4</sub> <sup>+2</sup>  | 814.4781                | y <sub>7</sub>                                                | 1097.0254 <sup>+2</sup> | y <sub>19</sub> <sup>+2</sup>                                 | 1782.9596 | y <sub>16</sub>                                 |
| 208.6344 <sup>+2</sup> | y <sub>3</sub> <sup>+2</sup>                                 | 529.3457               | y <sub>4</sub>                                                | 817.4127 <sup>+2</sup>  | b <sub>15</sub> -H <sub>3</sub> PO <sub>4</sub> <sup>+2</sup> | 1097.5711 <sup>+2</sup> | y <sub>20</sub> -H <sub>3</sub> PO <sub>4</sub> <sup>+2</sup> | 1821.8977 | b <sub>17</sub> -H <sub>3</sub> PO <sub>4</sub> |
| 212.0912 <sup>+2</sup> | b <sub>3</sub> <sup>+2</sup>                                 | 544.2907 <sup>+2</sup> | y <sub>10</sub> <sup>+2</sup>                                 | 817.8747 <sup>+2</sup>  | b <sub>14</sub> <sup>+2</sup>                                 | 1136.4983               | b <sub>9</sub>                                                | 1832.8426 | b <sub>16</sub>                                 |
| 227.1321 <sup>+2</sup> | b <sub>4</sub> -H <sub>3</sub> PO <sub>4</sub> <sup>+2</sup> | 551.2337               | b <sub>4</sub>                                                | 835.4414 <sup>+2</sup>  | y <sub>15</sub> <sup>+2</sup>                                 | 1137.5543 <sup>+2</sup> | b <sub>20</sub> <sup>+2</sup>                                 | 1897.9865 | y <sub>17</sub>                                 |
| 256.1768               | b <sub>2</sub>                                               | 568.2838               | b <sub>5</sub> -H <sub>3</sub> PO <sub>4</sub>                | 866.4011 <sup>+2</sup>  | b <sub>15</sub> <sup>+2</sup>                                 | 1146.5596 <sup>+2</sup> | y <sub>20</sub> <sup>+2</sup>                                 | 1919.8746 | b <sub>17</sub>                                 |
| 265.1765 <sup>+2</sup> | y <sub>4</sub> <sup>+2</sup>                                 | 568.7528 <sup>+2</sup> | b <sub>9</sub> <sup>+2</sup>                                  | 867.9365 <sup>+2</sup>  | b <sub>16</sub> -H <sub>3</sub> PO <sub>4</sub> <sup>+2</sup> | 1166.6164               | b <sub>10</sub> -H <sub>3</sub> PO <sub>4</sub>               | 1934.9818 | b <sub>18</sub> -H <sub>3</sub> PO <sub>4</sub> |
| 276.1205 <sup>+2</sup> | b <sub>4</sub> <sup>+2</sup>                                 | 583.8118 <sup>+2</sup> | b <sub>10</sub> -H <sub>3</sub> PO <sub>4</sub> <sup>+2</sup> | 891.9834 <sup>+2</sup>  | y <sub>16</sub> <sup>+2</sup>                                 | 1175.6217 <sup>+2</sup> | MH-H <sub>3</sub> PO <sub>4</sub> <sup>+2</sup>               | 2026.0451 | y <sub>18</sub>                                 |
| 284.6455 <sup>+2</sup> | b <sub>5</sub> -H <sub>3</sub> PO <sub>4</sub> <sup>+2</sup> | 592.8171 <sup>+2</sup> | y <sub>11</sub> <sup>+2</sup>                                 | 901.5102                | y <sub>8</sub>                                                | 1184.627                | y <sub>11</sub>                                               | 2032.9587 | b <sub>18</sub>                                 |
| 288.203                | y <sub>2</sub>                                               | 616.3777               | y <sub>5</sub>                                                | 908.3873                | b <sub>7</sub>                                                | 1224.6101 <sup>+2</sup> | MH <sup>+2</sup>                                              | 2063.0404 | b <sub>19</sub> -H <sub>3</sub> PO <sub>4</sub> |
| 308.6925 <sup>+2</sup> | y <sub>5</sub> <sup>+2</sup>                                 | 632.3382 <sup>+2</sup> | b <sub>11</sub> -H <sub>3</sub> PO <sub>4</sub> <sup>+2</sup> | 909.4789                | b <sub>8</sub> -H <sub>3</sub> PO <sub>4</sub>                | 1263.6692               | b <sub>11</sub> -H <sub>3</sub> PO <sub>4</sub>               | 2095.0666 | y <sub>19</sub> -H <sub>3</sub> PO <sub>4</sub> |
| 325.1983               | b <sub>3</sub> -H <sub>3</sub> PO <sub>4</sub>               | 632.8003 <sup>+2</sup> | b <sub>10</sub> <sup>+2</sup>                                 | 911.4525 <sup>+2</sup>  | b <sub>17</sub> -H <sub>3</sub> PO <sub>4</sub> <sup>+2</sup> | 1264.5933               | b <sub>10</sub>                                               | 2161.0173 | b <sub>19</sub>                                 |
| 333.6340 <sup>+2</sup> | b <sub>2</sub> <sup>+2</sup>                                 | 656.8646 <sup>+2</sup> | y <sub>12</sub> <sup>+2</sup>                                 | 916.9249 <sup>+2</sup>  | b <sub>16</sub> <sup>+2</sup>                                 | 1312.7219               | y <sub>12</sub>                                               | 2176.1244 | b <sub>20</sub> -H <sub>3</sub> PO <sub>4</sub> |
| 341.1876 <sup>+2</sup> | b <sub>6</sub> -H <sub>3</sub> PO <sub>4</sub> <sup>+2</sup> | 666.2607               | b <sub>5</sub>                                                | 949.4969 <sup>+2</sup>  | y <sub>17</sub> <sup>+2</sup>                                 | 1361.6461               | b <sub>11</sub>                                               | 2193.0435 | y <sub>19</sub>                                 |
| 359.2163 <sup>+2</sup> | y <sub>6</sub> <sup>+2</sup>                                 | 681.3267 <sup>+2</sup> | b <sub>11</sub> <sup>+2</sup>                                 | 960.4410 <sup>+2</sup>  | b <sub>17</sub> <sup>+2</sup>                                 | 1378.6961               | b <sub>12</sub> -H <sub>3</sub> PO <sub>4</sub>               | 2194.135  | y <sub>20</sub> -H <sub>3</sub> PO <sub>4</sub> |
| 390.1760 <sup>+2</sup> | b <sub>6</sub> <sup>+2</sup>                                 | 681.3678               | b <sub>6</sub> -H <sub>3</sub> PO <sub>4</sub>                | 967.9945 <sup>+2</sup>  | b <sub>18</sub> -H <sub>3</sub> PO <sub>4</sub> <sup>+2</sup> | 1441.7645               | y <sub>13</sub>                                               | 2274.1013 | b <sub>20</sub>                                 |
| 405.7089 <sup>+2</sup> | b <sub>7</sub> -H <sub>3</sub> PO <sub>4</sub> <sup>+2</sup> | 689.8517 <sup>+2</sup> | b <sub>12</sub> -H <sub>3</sub> PO <sub>4</sub> <sup>+2</sup> | 972.5473                | y <sub>9</sub>                                                | 1449.7332               | b <sub>13</sub> -H <sub>3</sub> PO <sub>4</sub>               | 2292.1119 | y <sub>20</sub>                                 |
| 407.7427 <sup>+2</sup> | y <sub>7</sub> <sup>+2</sup>                                 | 717.4254               | y <sub>6</sub>                                                | 1007.4558               | b <sub>8</sub>                                                | 1476.673                | b <sub>12</sub>                                               | 2350.2361 | MH-H <sub>3</sub> PO <sub>4</sub>               |
| 416.2616               | y <sub>3</sub>                                               | 721.3859 <sup>+2</sup> | y <sub>13</sub> <sup>+2</sup>                                 | 1013.5262 <sup>+2</sup> | y <sub>18</sub> <sup>+2</sup>                                 | 1536.7653               | b <sub>14</sub> -H <sub>3</sub> PO <sub>4</sub>               | 2448.213  | MH                                              |
| 423.1752               | b <sub>3</sub>                                               | 725.3703 <sup>+2</sup> | b <sub>13</sub> -H <sub>3</sub> PO <sub>4</sub> <sup>+2</sup> | 1016.9830 <sup>+2</sup> | b <sub>18</sub> <sup>+2</sup>                                 | 1540.8329               | y <sub>14</sub>                                               |           |                                                 |
| 451.2587 <sup>+2</sup> | y <sub>8</sub> <sup>+2</sup>                                 | 738.8401 <sup>+2</sup> | b <sub>12</sub> <sup>+2</sup>                                 | 1032.0238 <sup>+2</sup> | b <sub>19</sub> -H <sub>3</sub> PO <sub>4</sub> <sup>+2</sup> | 1547.7101               | b <sub>13</sub>                                               |           |                                                 |
| 453.2568               | b <sub>4</sub> -H <sub>3</sub> PO <sub>4</sub>               | 768.8863 <sup>+2</sup> | b <sub>14</sub> -H <sub>3</sub> PO <sub>4</sub> <sup>+2</sup> | 1038.5214               | b <sub>9</sub> -H <sub>3</sub> PO <sub>4</sub>                | 1633.818                | b <sub>15</sub> -H <sub>3</sub> PO <sub>4</sub>               |           |                                                 |

MS/MS Fragmentation of sLPVSICR  
 Found in IPI00304817, SAM and SH3 domain-containing protein 1

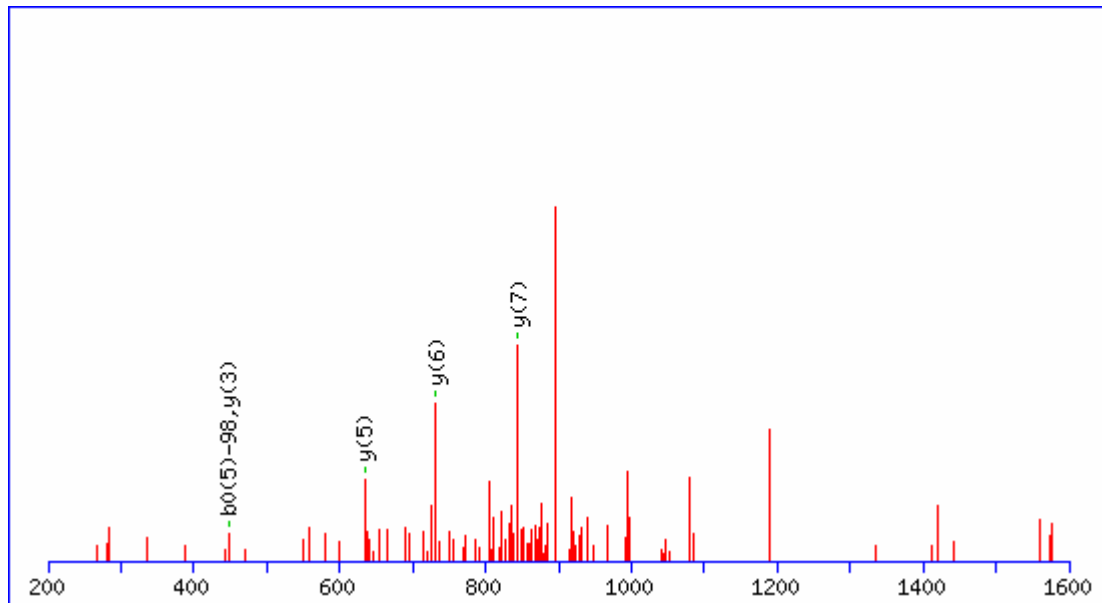

|                        |                                                |                        |                                                |                        |                                                 |                        |                                                |          |                                                |
|------------------------|------------------------------------------------|------------------------|------------------------------------------------|------------------------|-------------------------------------------------|------------------------|------------------------------------------------|----------|------------------------------------------------|
| 88.0631 <sup>+2</sup>  | y <sub>1</sub> <sup>+2</sup>                   | 278.1281               | y <sub>2</sub>                                 | 379.234                | b <sub>4</sub> -H <sub>3</sub> PO <sub>4</sub>  | 477.7276 <sup>+2</sup> | MH <sup>+2</sup>                               | 677.327  | b <sub>6</sub>                                 |
| 139.5677 <sup>+2</sup> | y <sub>2</sub> <sup>+2</sup>                   | 280.1656               | b <sub>3</sub> -H <sub>3</sub> PO <sub>4</sub> | 391.2122               | y <sub>3</sub>                                  | 478.2442               | y <sub>4</sub>                                 | 682.3593 | b <sub>7</sub> -H <sub>3</sub> PO <sub>4</sub> |
| 175.119                | y <sub>1</sub>                                 | 281.0897               | b <sub>2</sub>                                 | 394.2284 <sup>+2</sup> | y <sub>7</sub> <sup>+2</sup>                    | 564.2429               | b <sub>5</sub>                                 | 780.3362 | b <sub>7</sub>                                 |
| 183.1128               | b <sub>2</sub> -H <sub>3</sub> PO <sub>4</sub> | 289.1600 <sup>+2</sup> | y <sub>5</sub> <sup>+2</sup>                   | 428.7391 <sup>+2</sup> | MH-H <sub>3</sub> PO <sub>4</sub> <sup>+2</sup> | 577.3126               | y <sub>5</sub>                                 | 787.4495 | y <sub>7</sub>                                 |
| 196.1097 <sup>+2</sup> | y <sub>3</sub> <sup>+2</sup>                   | 337.6863 <sup>+2</sup> | y <sub>6</sub> <sup>+2</sup>                   | 466.266                | b <sub>5</sub> -H <sub>3</sub> PO <sub>4</sub>  | 579.3501               | b <sub>6</sub> -H <sub>3</sub> PO <sub>4</sub> | 856.4709 | MH-H <sub>3</sub> PO <sub>4</sub>              |
| 239.6258 <sup>+2</sup> | y <sub>4</sub> <sup>+2</sup>                   | 378.1425               | b <sub>3</sub>                                 | 477.2109               | b <sub>4</sub>                                  | 674.3654               | y <sub>6</sub>                                 | 954.4478 | MH                                             |

MS/MS Fragmentation of RTPsEADRWLEEVSK  
 Found in IPI00028059, Isoform 1 of Protein numb homolog

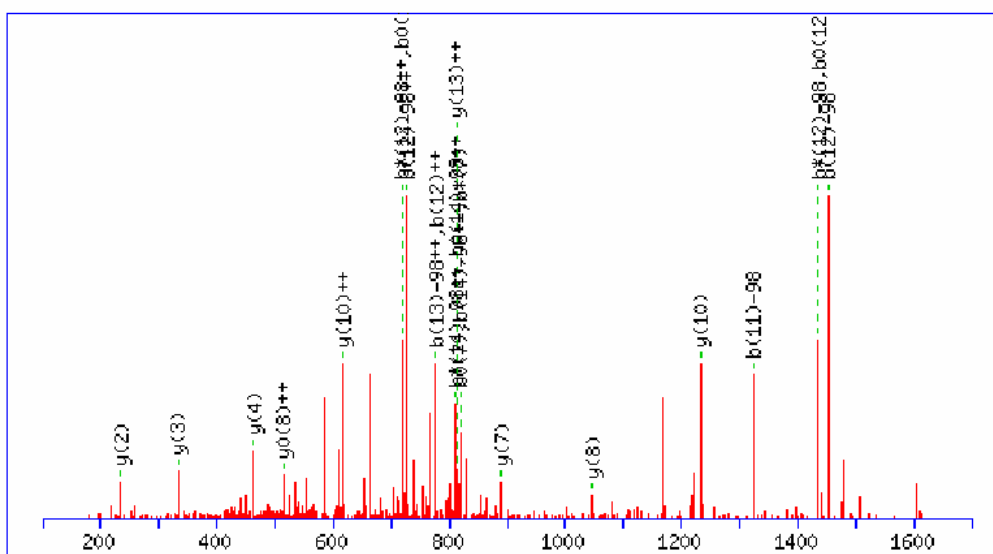

|                        |                                                              |                        |                                                               |                        |                                                               |                        |                                                 |           |                                                 |
|------------------------|--------------------------------------------------------------|------------------------|---------------------------------------------------------------|------------------------|---------------------------------------------------------------|------------------------|-------------------------------------------------|-----------|-------------------------------------------------|
| 74.0600 <sup>+2</sup>  | y <sub>1</sub> <sup>+2</sup>                                 | 361.6471 <sup>+2</sup> | b <sub>6</sub> <sup>+2</sup>                                  | 646.7928 <sup>+2</sup> | b <sub>10</sub> <sup>+2</sup>                                 | 837.3138               | b <sub>7</sub>                                  | 1430.691  | y <sub>12</sub> -H <sub>3</sub> PO <sub>4</sub> |
| 117.5761 <sup>+2</sup> | y <sub>2</sub> <sup>+2</sup>                                 | 370.1721 <sup>+2</sup> | b <sub>7</sub> -H <sub>3</sub> PO <sub>4</sub> <sup>+2</sup>  | 651.2498               | b <sub>5</sub>                                                | 863.8878 <sup>+2</sup> | y <sub>14</sub> <sup>+2</sup>                   | 1452.6866 | b <sub>12</sub> -H <sub>3</sub> PO <sub>4</sub> |
| 129.5817 <sup>+2</sup> | b <sub>2</sub> <sup>+2</sup>                                 | 419.1606 <sup>+2</sup> | b <sub>7</sub> <sup>+2</sup>                                  | 662.3257 <sup>+2</sup> | b <sub>11</sub> -H <sub>3</sub> PO <sub>4</sub> <sup>+2</sup> | 868.8856 <sup>+2</sup> | b <sub>14</sub> <sup>+2</sup>                   | 1527.7438 | y <sub>13</sub> -H <sub>3</sub> PO <sub>4</sub> |
| 147.1128               | y <sub>1</sub>                                               | 424.2303               | b <sub>4</sub> -H <sub>3</sub> PO <sub>4</sub>                | 681.3384 <sup>+2</sup> | y <sub>11</sub> <sup>+2</sup>                                 | 890.4618               | y <sub>7</sub>                                  | 1528.6679 | y <sub>12</sub>                                 |
| 167.1103 <sup>+2</sup> | y <sub>3</sub> <sup>+2</sup>                                 | 445.7345 <sup>+2</sup> | y <sub>7</sub> <sup>+2</sup>                                  | 704.3825               | y <sub>6</sub>                                                | 892.9499 <sup>+2</sup> | MH-H <sub>3</sub> PO <sub>4</sub> <sup>+2</sup> | 1550.6635 | b <sub>12</sub>                                 |
| 178.1081 <sup>+2</sup> | b <sub>3</sub> <sup>+2</sup>                                 | 448.2227 <sup>+2</sup> | b <sub>8</sub> -H <sub>3</sub> PO <sub>4</sub> <sup>+2</sup>  | 711.3141 <sup>+2</sup> | b <sub>11</sub> <sup>+2</sup>                                 | 895.4381               | b <sub>8</sub> -H <sub>3</sub> PO <sub>4</sub>  | 1551.755  | b <sub>13</sub> -H <sub>3</sub> PO <sub>4</sub> |
| 212.6188 <sup>+2</sup> | b <sub>4</sub> -H <sub>3</sub> PO <sub>4</sub> <sup>+2</sup> | 462.2558               | y <sub>4</sub>                                                | 715.8492 <sup>+2</sup> | y <sub>12</sub> -H <sub>3</sub> PO <sub>4</sub> <sup>+2</sup> | 941.9384 <sup>+2</sup> | MH <sup>+2</sup>                                | 1625.7207 | y <sub>13</sub>                                 |
| 231.6316 <sup>+2</sup> | y <sub>4</sub> <sup>+2</sup>                                 | 497.2111 <sup>+2</sup> | b <sub>8</sub> <sup>+2</sup>                                  | 722.2869               | b <sub>6</sub>                                                | 993.4149               | b <sub>8</sub>                                  | 1628.7915 | y <sub>14</sub> -H <sub>3</sub> PO <sub>4</sub> |
| 234.1448               | y <sub>2</sub>                                               | 522.2072               | b <sub>4</sub>                                                | 726.8469 <sup>+2</sup> | b <sub>12</sub> -H <sub>3</sub> PO <sub>4</sub> <sup>+2</sup> | 1046.5629              | y <sub>8</sub>                                  | 1638.7871 | b <sub>14</sub> -H <sub>3</sub> PO <sub>4</sub> |
| 258.1561               | b <sub>2</sub>                                               | 523.7851 <sup>+2</sup> | y <sub>8</sub> <sup>+2</sup>                                  | 739.3369               | b <sub>7</sub> -H <sub>3</sub> PO <sub>4</sub>                | 1081.5174              | b <sub>9</sub> -H <sub>3</sub> PO <sub>4</sub>  | 1649.7319 | b <sub>13</sub>                                 |
| 261.6072 <sup>+2</sup> | b <sub>4</sub> <sup>+2</sup>                                 | 541.2623 <sup>+2</sup> | b <sub>9</sub> -H <sub>3</sub> PO <sub>4</sub> <sup>+2</sup>  | 764.3755 <sup>+2</sup> | y <sub>13</sub> -H <sub>3</sub> PO <sub>4</sub> <sup>+2</sup> | 1161.5899              | y <sub>9</sub>                                  | 1726.7684 | y <sub>14</sub>                                 |
| 277.1401 <sup>+2</sup> | b <sub>5</sub> -H <sub>3</sub> PO <sub>4</sub> <sup>+2</sup> | 553.2729               | b <sub>5</sub> -H <sub>3</sub> PO <sub>4</sub>                | 764.8376 <sup>+2</sup> | y <sub>12</sub> <sup>+2</sup>                                 | 1179.4943              | b <sub>9</sub>                                  | 1736.764  | b <sub>14</sub>                                 |
| 296.1529 <sup>+2</sup> | y <sub>5</sub> <sup>+2</sup>                                 | 581.2986 <sup>+2</sup> | y <sub>9</sub> <sup>+2</sup>                                  | 775.8354 <sup>+2</sup> | b <sub>12</sub> <sup>+2</sup>                                 | 1194.6014              | b <sub>10</sub> -H <sub>3</sub> PO <sub>4</sub> | 1784.8926 | MH-H <sub>3</sub> PO <sub>4</sub>               |
| 312.6586 <sup>+2</sup> | b <sub>6</sub> -H <sub>3</sub> PO <sub>4</sub> <sup>+2</sup> | 590.2508 <sup>+2</sup> | b <sub>9</sub> <sup>+2</sup>                                  | 776.3812 <sup>+2</sup> | b <sub>13</sub> -H <sub>3</sub> PO <sub>4</sub> <sup>+2</sup> | 1232.627               | y <sub>10</sub>                                 | 1882.8695 | MH                                              |
| 326.1285 <sup>+2</sup> | b <sub>5</sub> <sup>+2</sup>                                 | 591.2984               | y <sub>5</sub>                                                | 813.3640 <sup>+2</sup> | y <sub>13</sub> <sup>+2</sup>                                 | 1292.5783              | b <sub>10</sub>                                 |           |                                                 |
| 333.2132               | y <sub>3</sub>                                               | 597.8044 <sup>+2</sup> | b <sub>10</sub> -H <sub>3</sub> PO <sub>4</sub> <sup>+2</sup> | 814.8994 <sup>+2</sup> | y <sub>14</sub> -H <sub>3</sub> PO <sub>4</sub> <sup>+2</sup> | 1323.644               | b <sub>11</sub> -H <sub>3</sub> PO <sub>4</sub> |           |                                                 |
| 352.6949 <sup>+2</sup> | y <sub>6</sub> <sup>+2</sup>                                 | 616.8171 <sup>+2</sup> | y <sub>10</sub> <sup>+2</sup>                                 | 819.8972 <sup>+2</sup> | b <sub>14</sub> -H <sub>3</sub> PO <sub>4</sub> <sup>+2</sup> | 1361.6696              | y <sub>11</sub>                                 |           |                                                 |
| 355.2088               | b <sub>3</sub>                                               | 624.31                 | b <sub>6</sub> -H <sub>3</sub> PO <sub>4</sub>                | 825.3696 <sup>+2</sup> | b <sub>13</sub> <sup>+2</sup>                                 | 1421.6209              | b <sub>11</sub>                                 |           |                                                 |



MS/MS Fragmentation of RtPSEADRWLEEVSK  
 Found in IPI00180920, Isoform 4 of Protein numb homolog

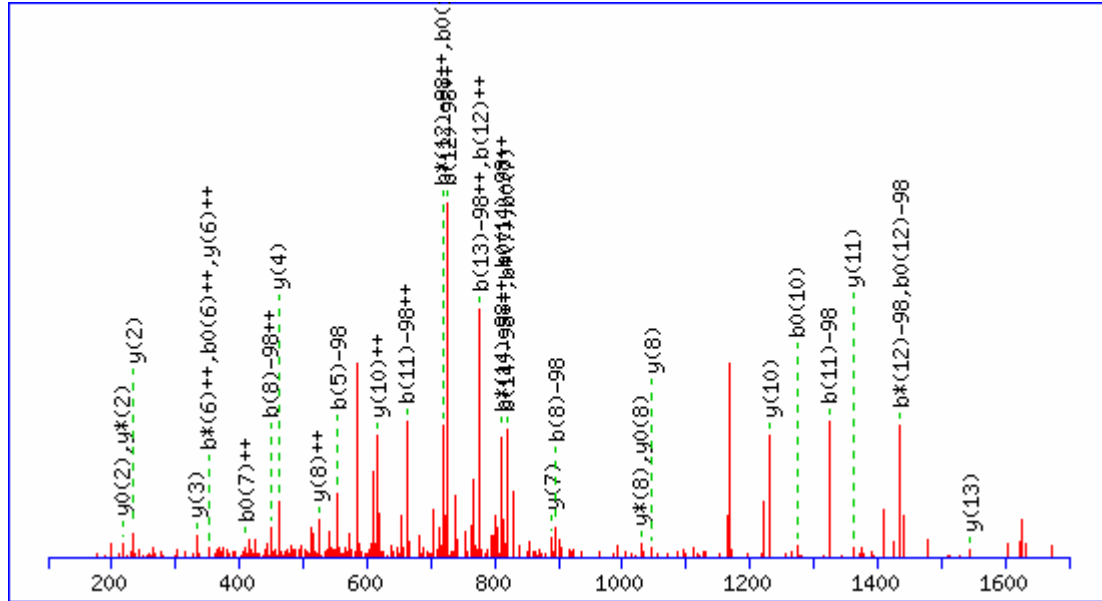

|                        |                                                              |                        |                                                              |                        |                                                               |                        |                                                               |           |                                                 |
|------------------------|--------------------------------------------------------------|------------------------|--------------------------------------------------------------|------------------------|---------------------------------------------------------------|------------------------|---------------------------------------------------------------|-----------|-------------------------------------------------|
| 74.0600 <sup>+2</sup>  | y <sub>1</sub> <sup>+2</sup>                                 | 337.1983               | b <sub>3</sub> -H <sub>3</sub> PO <sub>4</sub>               | 591.2984               | y <sub>5</sub>                                                | 819.8972 <sup>+2</sup> | b <sub>14</sub> -H <sub>3</sub> PO <sub>4</sub> <sup>+2</sup> | 1361.6696 | y <sub>11</sub>                                 |
| 117.5761 <sup>+2</sup> | y <sub>2</sub> <sup>+2</sup>                                 | 338.1224               | b <sub>2</sub>                                               | 597.8044 <sup>+2</sup> | b <sub>10</sub> -H <sub>3</sub> PO <sub>4</sub> <sup>+2</sup> | 825.3696 <sup>+2</sup> | b <sub>13</sub> <sup>+2</sup>                                 | 1421.6209 | b <sub>11</sub>                                 |
| 120.5764 <sup>+2</sup> | b <sub>2</sub> -H <sub>3</sub> PO <sub>4</sub> <sup>+2</sup> | 352.6949 <sup>+2</sup> | y <sub>6</sub> <sup>+2</sup>                                 | 616.8171 <sup>+2</sup> | y <sub>10</sub> <sup>+2</sup>                                 | 837.3138               | b <sub>7</sub>                                                | 1448.7016 | y <sub>12</sub>                                 |
| 147.1128               | y <sub>1</sub>                                               | 361.6471 <sup>+2</sup> | b <sub>6</sub> <sup>+2</sup>                                 | 624.31                 | b <sub>6</sub> -H <sub>3</sub> PO <sub>4</sub>                | 863.8878 <sup>+2</sup> | y <sub>14</sub> <sup>+2</sup>                                 | 1452.6866 | b <sub>12</sub> -H <sub>3</sub> PO <sub>4</sub> |
| 167.1103 <sup>+2</sup> | y <sub>3</sub> <sup>+2</sup>                                 | 370.1721 <sup>+2</sup> | b <sub>7</sub> -H <sub>3</sub> PO <sub>4</sub> <sup>+2</sup> | 646.7928 <sup>+2</sup> | b <sub>10</sub> <sup>+2</sup>                                 | 868.8856 <sup>+2</sup> | b <sub>14</sub> <sup>+2</sup>                                 | 1545.7544 | y <sub>13</sub>                                 |
| 169.1028 <sup>+2</sup> | b <sub>3</sub> -H <sub>3</sub> PO <sub>4</sub> <sup>+2</sup> | 419.1606 <sup>+2</sup> | b <sub>7</sub> <sup>+2</sup>                                 | 651.2498               | b <sub>5</sub>                                                | 890.4618               | y <sub>7</sub>                                                | 1550.6635 | b <sub>12</sub>                                 |
| 169.5648 <sup>+2</sup> | b <sub>2</sub> <sup>+2</sup>                                 | 424.2303               | b <sub>4</sub> -H <sub>3</sub> PO <sub>4</sub>               | 662.3257 <sup>+2</sup> | b <sub>11</sub> -H <sub>3</sub> PO <sub>4</sub> <sup>+2</sup> | 892.9499 <sup>+2</sup> | MH-H <sub>3</sub> PO <sub>4</sub> <sup>+2</sup>               | 1551.755  | b <sub>13</sub> -H <sub>3</sub> PO <sub>4</sub> |
| 212.6188 <sup>+2</sup> | b <sub>4</sub> -H <sub>3</sub> PO <sub>4</sub> <sup>+2</sup> | 435.1752               | b <sub>3</sub>                                               | 681.3384 <sup>+2</sup> | y <sub>11</sub> <sup>+2</sup>                                 | 895.4381               | b <sub>8</sub> -H <sub>3</sub> PO <sub>4</sub>                | 1628.7915 | y <sub>14</sub> -H <sub>3</sub> PO <sub>4</sub> |
| 218.0912 <sup>+2</sup> | b <sub>3</sub> <sup>+2</sup>                                 | 445.7345 <sup>+2</sup> | y <sub>7</sub> <sup>+2</sup>                                 | 704.3825               | y <sub>6</sub>                                                | 941.9384 <sup>+2</sup> | MH <sup>+2</sup>                                              | 1638.7871 | b <sub>14</sub> -H <sub>3</sub> PO <sub>4</sub> |
| 231.6316 <sup>+2</sup> | y <sub>4</sub> <sup>+2</sup>                                 | 448.2227 <sup>+2</sup> | b <sub>8</sub> -H <sub>3</sub> PO <sub>4</sub> <sup>+2</sup> | 711.3141 <sup>+2</sup> | b <sub>11</sub> <sup>+2</sup>                                 | 993.4149               | b <sub>8</sub>                                                | 1649.7319 | b <sub>13</sub>                                 |
| 234.1448               | y <sub>2</sub>                                               | 462.2558               | y <sub>4</sub>                                               | 722.2869               | b <sub>6</sub>                                                | 1046.5629              | y <sub>8</sub>                                                | 1726.7684 | y <sub>14</sub>                                 |
| 240.1455               | b <sub>2</sub> -H <sub>3</sub> PO <sub>4</sub>               | 497.2111 <sup>+2</sup> | b <sub>8</sub> <sup>+2</sup>                                 | 724.8544 <sup>+2</sup> | y <sub>12</sub> <sup>+2</sup>                                 | 1081.5174              | b <sub>9</sub> -H <sub>3</sub> PO <sub>4</sub>                | 1736.764  | b <sub>14</sub>                                 |
| 261.6072 <sup>+2</sup> | b <sub>4</sub> <sup>+2</sup>                                 | 522.2072               | b <sub>4</sub>                                               | 726.8469 <sup>+2</sup> | b <sub>12</sub> -H <sub>3</sub> PO <sub>4</sub> <sup>+2</sup> | 1161.5899              | y <sub>9</sub>                                                | 1784.8926 | MH-H <sub>3</sub> PO <sub>4</sub>               |
| 277.1401 <sup>+2</sup> | b <sub>5</sub> -H <sub>3</sub> PO <sub>4</sub> <sup>+2</sup> | 523.7851 <sup>+2</sup> | y <sub>8</sub> <sup>+2</sup>                                 | 739.3369               | b <sub>7</sub> -H <sub>3</sub> PO <sub>4</sub>                | 1179.4943              | b <sub>9</sub>                                                | 1882.8695 | MH                                              |
| 296.1529 <sup>+2</sup> | y <sub>5</sub> <sup>+2</sup>                                 | 541.2623 <sup>+2</sup> | b <sub>9</sub> -H <sub>3</sub> PO <sub>4</sub> <sup>+2</sup> | 773.3808 <sup>+2</sup> | y <sub>13</sub> <sup>+2</sup>                                 | 1194.6014              | b <sub>10</sub> -H <sub>3</sub> PO <sub>4</sub>               |           |                                                 |
| 312.6586 <sup>+2</sup> | b <sub>6</sub> -H <sub>3</sub> PO <sub>4</sub> <sup>+2</sup> | 553.2729               | b <sub>5</sub> -H <sub>3</sub> PO <sub>4</sub>               | 775.8354 <sup>+2</sup> | b <sub>12</sub> <sup>+2</sup>                                 | 1232.627               | y <sub>10</sub>                                               |           |                                                 |
| 326.1285 <sup>+2</sup> | b <sub>5</sub> <sup>+2</sup>                                 | 581.2986 <sup>+2</sup> | y <sub>9</sub> <sup>+2</sup>                                 | 776.3812 <sup>+2</sup> | b <sub>13</sub> -H <sub>3</sub> PO <sub>4</sub> <sup>+2</sup> | 1292.5783              | b <sub>10</sub>                                               |           |                                                 |
| 333.2132               | y <sub>3</sub>                                               | 590.2508 <sup>+2</sup> | b <sub>9</sub> <sup>+2</sup>                                 | 814.8994 <sup>+2</sup> | y <sub>14</sub> -H <sub>3</sub> PO <sub>4</sub> <sup>+2</sup> | 1323.644               | b <sub>11</sub> -H <sub>3</sub> PO <sub>4</sub>               |           |                                                 |

MS/MS Fragmentation of HSL(SS)GGFSPVAGVGAQGDYQRPHSAQPADR  
 Found in IPI00337612, Discoidin, CUB and LCCL domain-containing protein 1 precursor

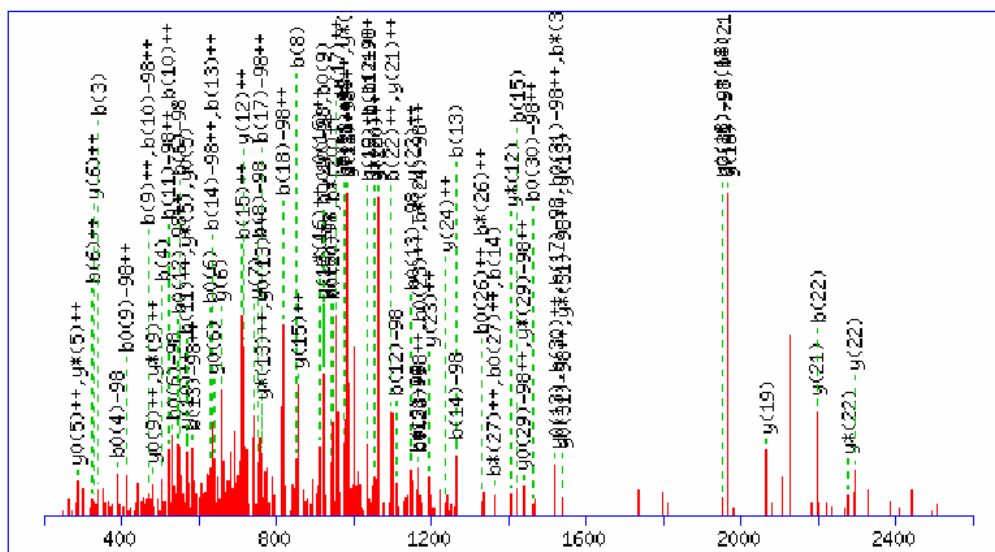

|                        |                                                               |                        |                                                               |                         |                                                               |                         |                                                               |           |                                                 |
|------------------------|---------------------------------------------------------------|------------------------|---------------------------------------------------------------|-------------------------|---------------------------------------------------------------|-------------------------|---------------------------------------------------------------|-----------|-------------------------------------------------|
| 88.0631 <sup>+2</sup>  | y <sub>1</sub> <sup>+2</sup>                                  | 568.7422 <sup>+2</sup> | b <sub>11</sub> <sup>+2</sup>                                 | 978.4752                | y <sub>9</sub>                                                | 1393.6859               | b <sub>16</sub> -H <sub>3</sub> PO <sub>4</sub>               | 2124.9806 | y <sub>20</sub>                                 |
| 113.0527 <sup>+2</sup> | b <sub>2</sub> <sup>+2</sup>                                  | 583.7831 <sup>+2</sup> | b <sub>13</sub> -H <sub>3</sub> PO <sub>4</sub> <sup>+2</sup> | 984.9490 <sup>+2</sup>  | y <sub>18</sub> <sup>+2</sup>                                 | 1414.1608 <sup>+2</sup> | y <sub>28</sub> <sup>+2</sup>                                 | 2196.0177 | y <sub>21</sub>                                 |
| 145.5766 <sup>+2</sup> | y <sub>2</sub> <sup>+2</sup>                                  | 586.2944               | y <sub>5</sub>                                                | 986.4452 <sup>+2</sup>  | b <sub>21</sub> -H <sub>3</sub> PO <sub>4</sub> <sup>+2</sup> | 1420.6257               | b <sub>15</sub>                                               | 2197.9186 | b <sub>22</sub>                                 |
| 169.5948 <sup>+2</sup> | b <sub>3</sub> <sup>+2</sup>                                  | 592.2127               | b <sub>5</sub>                                                | 1034.4832 <sup>+2</sup> | y <sub>19</sub> <sup>+2</sup>                                 | 1425.6982               | y <sub>12</sub>                                               | 2256.0428 | b <sub>23</sub> -H <sub>3</sub> PO <sub>4</sub> |
| 175.119                | y <sub>1</sub>                                                | 604.2608 <sup>+2</sup> | b <sub>12</sub> <sup>+2</sup>                                 | 1035.4337 <sup>+2</sup> | b <sub>21</sub> <sup>+2</sup>                                 | 1437.1711 <sup>+2</sup> | b <sub>29</sub> -H <sub>3</sub> PO <sub>4</sub> <sup>+2</sup> | 2295.0861 | y <sub>22</sub>                                 |
| 181.0951 <sup>+2</sup> | y <sub>3</sub> <sup>+2</sup>                                  | 608.2787               | b <sub>7</sub> -H <sub>3</sub> PO <sub>4</sub>                | 1037.4088               | b <sub>10</sub>                                               | 1437.6332 <sup>+2</sup> | b <sub>28</sub> <sup>+2</sup>                                 | 2353.0956 | b <sub>24</sub> -H <sub>3</sub> PO <sub>4</sub> |
| 204.1055 <sup>+2</sup> | b <sub>4</sub> -H <sub>3</sub> PO <sub>4</sub> <sup>+2</sup>  | 631.8211 <sup>+2</sup> | y <sub>11</sub> <sup>+2</sup>                                 | 1038.5003               | b <sub>11</sub> -H <sub>3</sub> PO <sub>4</sub>               | 1448.6715 <sup>+2</sup> | y <sub>29</sub> -H <sub>3</sub> PO <sub>4</sub> <sup>+2</sup> | 2354.0197 | b <sub>23</sub>                                 |
| 225.0982               | b <sub>2</sub>                                                | 632.7715 <sup>+2</sup> | b <sub>13</sub> <sup>+2</sup>                                 | 1050.4745 <sup>+2</sup> | b <sub>22</sub> -H <sub>3</sub> PO <sub>4</sub> <sup>+2</sup> | 1472.6897 <sup>+2</sup> | b <sub>30</sub> -H <sub>3</sub> PO <sub>4</sub> <sup>+2</sup> | 2392.1389 | y <sub>23</sub>                                 |
| 229.6215 <sup>+2</sup> | y <sub>4</sub> <sup>+2</sup>                                  | 633.3173 <sup>+2</sup> | b <sub>14</sub> -H <sub>3</sub> PO <sub>4</sub> <sup>+2</sup> | 1062.9939 <sup>+2</sup> | y <sub>20</sub> <sup>+2</sup>                                 | 1486.1596 <sup>+2</sup> | b <sub>29</sub> <sup>+2</sup>                                 | 2451.0725 | b <sub>24</sub>                                 |
| 247.6215 <sup>+2</sup> | b <sub>5</sub> -H <sub>3</sub> PO <sub>4</sub> <sup>+2</sup>  | 649.2341               | b <sub>6</sub>                                                | 1098.5125 <sup>+2</sup> | y <sub>21</sub> <sup>+2</sup>                                 | 1491.6628               | b <sub>16</sub>                                               | 2479.1709 | y <sub>24</sub>                                 |
| 253.0940 <sup>+2</sup> | b <sub>4</sub> <sup>+2</sup>                                  | 657.3315               | y <sub>6</sub>                                                | 1099.4629 <sup>+2</sup> | b <sub>22</sub> <sup>+2</sup>                                 | 1497.6599 <sup>+2</sup> | y <sub>29</sub> <sup>+2</sup>                                 | 2490.1545 | b <sub>25</sub> -H <sub>3</sub> PO <sub>4</sub> |
| 276.1323 <sup>+2</sup> | b <sub>6</sub> -H <sub>3</sub> PO <sub>4</sub> <sup>+2</sup>  | 661.8280 <sup>+2</sup> | b <sub>15</sub> -H <sub>3</sub> PO <sub>4</sub> <sup>+2</sup> | 1109.5374               | b <sub>12</sub> -H <sub>3</sub> PO <sub>4</sub>               | 1505.2135 <sup>+2</sup> | y <sub>30</sub> -H <sub>3</sub> PO <sub>4</sub> <sup>+2</sup> | 2577.1865 | b <sub>26</sub> -H <sub>3</sub> PO <sub>4</sub> |
| 290.1459               | y <sub>2</sub>                                                | 682.3057 <sup>+2</sup> | b <sub>14</sub> <sup>+2</sup>                                 | 1128.5251 <sup>+2</sup> | b <sub>23</sub> -H <sub>3</sub> PO <sub>4</sub> <sup>+2</sup> | 1521.6781 <sup>+2</sup> | b <sub>30</sub> <sup>+2</sup>                                 | 2588.1314 | b <sub>25</sub>                                 |
| 293.6508 <sup>+2</sup> | y <sub>5</sub> <sup>+2</sup>                                  | 697.3466 <sup>+2</sup> | b <sub>16</sub> -H <sub>3</sub> PO <sub>4</sub> <sup>+2</sup> | 1134.5763               | y <sub>10</sub>                                               | 1521.7445               | b <sub>17</sub> -H <sub>3</sub> PO <sub>4</sub>               | 2626.2393 | y <sub>25</sub>                                 |
| 296.6100 <sup>+2</sup> | b <sub>5</sub> <sup>+2</sup>                                  | 706.2556               | b <sub>7</sub>                                                | 1136.4772               | b <sub>11</sub>                                               | 1530.2032 <sup>+2</sup> | b <sub>31</sub> -H <sub>3</sub> PO <sub>4</sub> <sup>+2</sup> | 2648.2237 | b <sub>27</sub> -H <sub>3</sub> PO <sub>4</sub> |
| 304.6430 <sup>+2</sup> | b <sub>7</sub> -H <sub>3</sub> PO <sub>4</sub> <sup>+2</sup>  | 710.8165 <sup>+2</sup> | b <sub>15</sub> <sup>+2</sup>                                 | 1148.0467 <sup>+2</sup> | y <sub>22</sub> <sup>+2</sup>                                 | 1540.7251               | y <sub>13</sub>                                               | 2675.1634 | b <sub>26</sub>                                 |
| 325.1207 <sup>+2</sup> | b <sub>6</sub> <sup>+2</sup>                                  | 713.3527 <sup>+2</sup> | y <sub>12</sub> <sup>+2</sup>                                 | 1166.5589               | b <sub>13</sub> -H <sub>3</sub> PO <sub>4</sub>               | 1548.7295 <sup>+2</sup> | y <sub>31</sub> -H <sub>3</sub> PO <sub>4</sub> <sup>+2</sup> | 2683.2608 | y <sub>26</sub>                                 |
| 329.1694 <sup>+2</sup> | y <sub>6</sub> <sup>+2</sup>                                  | 744.3635               | y <sub>7</sub>                                                | 1177.0514 <sup>+2</sup> | b <sub>24</sub> -H <sub>3</sub> PO <sub>4</sub> <sup>+2</sup> | 1554.2020 <sup>+2</sup> | y <sub>30</sub> <sup>+2</sup>                                 | 2740.2822 | y <sub>27</sub>                                 |
| 338.1823               | b <sub>3</sub>                                                | 746.3350 <sup>+2</sup> | b <sub>16</sub> <sup>+2</sup>                                 | 1177.5135 <sup>+2</sup> | b <sub>23</sub> <sup>+2</sup>                                 | 1579.1916 <sup>+2</sup> | b <sub>31</sub> <sup>+2</sup>                                 | 2746.2005 | b <sub>27</sub>                                 |
| 353.6314 <sup>+2</sup> | b <sub>7</sub> <sup>+2</sup>                                  | 755.3471               | b <sub>8</sub> -H <sub>3</sub> PO <sub>4</sub>                | 1196.5731 <sup>+2</sup> | y <sub>23</sub> <sup>+2</sup>                                 | 1597.7180 <sup>+2</sup> | y <sub>31</sub> <sup>+2</sup>                                 | 2776.2822 | b <sub>28</sub> -H <sub>3</sub> PO <sub>4</sub> |
| 361.183                | y <sub>3</sub>                                                | 761.3759 <sup>+2</sup> | b <sub>17</sub> -H <sub>3</sub> PO <sub>4</sub> <sup>+2</sup> | 1207.5143               | b <sub>12</sub>                                               | 1597.7466               | y <sub>14</sub>                                               | 2827.3143 | y <sub>28</sub>                                 |
| 372.6854 <sup>+2</sup> | y <sub>7</sub> <sup>+2</sup>                                  | 770.8662 <sup>+2</sup> | y <sub>13</sub> <sup>+2</sup>                                 | 1226.0399 <sup>+2</sup> | b <sub>24</sub> <sup>+2</sup>                                 | 1617.2590 <sup>+2</sup> | MH-H <sub>3</sub> PO <sub>4</sub> <sup>+2</sup>               | 2873.335  | b <sub>29</sub> -H <sub>3</sub> PO <sub>4</sub> |
| 378.1772 <sup>+2</sup> | b <sub>8</sub> -H <sub>3</sub> PO <sub>4</sub> <sup>+2</sup>  | 799.3769 <sup>+2</sup> | y <sub>14</sub> <sup>+2</sup>                                 | 1240.0891 <sup>+2</sup> | y <sub>24</sub> <sup>+2</sup>                                 | 1619.7214               | b <sub>17</sub>                                               | 2874.2591 | b <sub>28</sub>                                 |
| 407.2037               | b <sub>4</sub> -H <sub>3</sub> PO <sub>4</sub>                | 810.3643 <sup>+2</sup> | b <sub>17</sub> <sup>+2</sup>                                 | 1245.5809 <sup>+2</sup> | b <sub>25</sub> -H <sub>3</sub> PO <sub>4</sub> <sup>+2</sup> | 1636.7714               | b <sub>18</sub> -H <sub>3</sub> PO <sub>4</sub>               | 2896.3357 | y <sub>29</sub> -H <sub>3</sub> PO <sub>4</sub> |
| 421.6932 <sup>+2</sup> | b <sub>9</sub> -H <sub>3</sub> PO <sub>4</sub> <sup>+2</sup>  | 818.8893 <sup>+2</sup> | b <sub>18</sub> -H <sub>3</sub> PO <sub>4</sub> <sup>+2</sup> | 1262.6349               | y <sub>11</sub>                                               | 1666.2474 <sup>+2</sup> | MH <sup>+2</sup>                                              | 2944.3721 | b <sub>30</sub> -H <sub>3</sub> PO <sub>4</sub> |
| 427.1656 <sup>+2</sup> | b <sub>8</sub> <sup>+2</sup>                                  | 842.3791               | b <sub>9</sub> -H <sub>3</sub> PO <sub>4</sub>                | 1264.5358               | b <sub>13</sub>                                               | 1693.7929               | b <sub>19</sub> -H <sub>3</sub> PO <sub>4</sub>               | 2971.3119 | b <sub>29</sub>                                 |
| 441.2148 <sup>+2</sup> | y <sub>8</sub> <sup>+2</sup>                                  | 847.4001 <sup>+2</sup> | b <sub>19</sub> -H <sub>3</sub> PO <sub>4</sub> <sup>+2</sup> | 1265.6273               | b <sub>14</sub> -H <sub>3</sub> PO <sub>4</sub>               | 1712.7735               | y <sub>15</sub>                                               | 2994.3126 | y <sub>29</sub>                                 |
| 458.2358               | y <sub>4</sub>                                                | 853.324                | b <sub>8</sub>                                                | 1289.0969 <sup>+2</sup> | b <sub>26</sub> -H <sub>3</sub> PO <sub>4</sub> <sup>+2</sup> | 1734.7483               | b <sub>18</sub>                                               | 3009.4198 | y <sub>30</sub> -H <sub>3</sub> PO <sub>4</sub> |
| 470.2196 <sup>+2</sup> | b <sub>10</sub> -H <sub>3</sub> PO <sub>4</sub> <sup>+2</sup> | 856.8904 <sup>+2</sup> | y <sub>15</sub> <sup>+2</sup>                                 | 1294.5693 <sup>+2</sup> | b <sub>25</sub> <sup>+2</sup>                                 | 1791.7698               | b <sub>19</sub>                                               | 3042.349  | b <sub>30</sub>                                 |
| 470.6817 <sup>+2</sup> | b <sub>9</sub> <sup>+2</sup>                                  | 867.8778 <sup>+2</sup> | b <sub>18</sub> <sup>+2</sup>                                 | 1313.6233 <sup>+2</sup> | y <sub>25</sub> <sup>+2</sup>                                 | 1808.8198               | b <sub>20</sub> -H <sub>3</sub> PO <sub>4</sub>               | 3059.399  | b <sub>31</sub> -H <sub>3</sub> PO <sub>4</sub> |
| 489.7412 <sup>+2</sup> | y <sub>9</sub> <sup>+2</sup>                                  | 881.4224               | y <sub>8</sub>                                                | 1322.6488               | b <sub>15</sub> -H <sub>3</sub> PO <sub>4</sub>               | 1840.8321               | y <sub>16</sub>                                               | 3096.4518 | y <sub>31</sub> -H <sub>3</sub> PO <sub>4</sub> |
| 494.2358               | b <sub>5</sub> -H <sub>3</sub> PO <sub>4</sub>                | 896.3885 <sup>+2</sup> | b <sub>19</sub> <sup>+2</sup>                                 | 1324.6155 <sup>+2</sup> | b <sub>27</sub> -H <sub>3</sub> PO <sub>4</sub> <sup>+2</sup> | 1906.7967               | b <sub>20</sub>                                               | 3107.3967 | y <sub>30</sub>                                 |
| 505.1806               | b <sub>4</sub>                                                | 904.9135 <sup>+2</sup> | b <sub>20</sub> -H <sub>3</sub> PO <sub>4</sub> <sup>+2</sup> | 1338.0854 <sup>+2</sup> | b <sub>26</sub> <sup>+2</sup>                                 | 1911.8692               | y <sub>17</sub>                                               | 3157.3759 | b <sub>31</sub>                                 |
| 519.2080 <sup>+2</sup> | b <sub>10</sub> <sup>+2</sup>                                 | 920.9197 <sup>+2</sup> | y <sub>16</sub> <sup>+2</sup>                                 | 1342.1340 <sup>+2</sup> | y <sub>26</sub> <sup>+2</sup>                                 | 1968.8907               | y <sub>18</sub>                                               | 3194.4287 | y <sub>31</sub>                                 |
| 519.7538 <sup>+2</sup> | b <sub>11</sub> -H <sub>3</sub> PO <sub>4</sub> <sup>+2</sup> | 939.4319               | b <sub>10</sub> -H <sub>3</sub> PO <sub>4</sub>               | 1363.6042               | b <sub>14</sub>                                               | 1971.8831               | b <sub>21</sub> -H <sub>3</sub> PO <sub>4</sub>               | 3233.5107 | MH-H <sub>3</sub> PO <sub>4</sub>               |
| 551.2572               | b <sub>6</sub> -H <sub>3</sub> PO <sub>4</sub>                | 940.356                | b <sub>9</sub>                                                | 1370.6448 <sup>+2</sup> | y <sub>27</sub> <sup>+2</sup>                                 | 2067.9591               | y <sub>19</sub>                                               | 3331.4876 | MH                                              |
| 555.2724 <sup>+2</sup> | b <sub>12</sub> -H <sub>3</sub> PO <sub>4</sub> <sup>+2</sup> | 953.9020 <sup>+2</sup> | b <sub>20</sub> <sup>+2</sup>                                 | 1373.6039 <sup>+2</sup> | b <sub>27</sub> <sup>+2</sup>                                 | 2069.86                 | b <sub>21</sub>                                               |           |                                                 |
| 567.7918 <sup>+2</sup> | y <sub>10</sub> <sup>+2</sup>                                 | 956.4383 <sup>+2</sup> | y <sub>17</sub> <sup>+2</sup>                                 | 1388.6448 <sup>+2</sup> | b <sub>28</sub> -H <sub>3</sub> PO <sub>4</sub> <sup>+2</sup> | 2099.9417               | b <sub>22</sub> -H <sub>3</sub> PO <sub>4</sub>               |           |                                                 |

MS/MS Fragmentation of RLsLPGLLSQVSPR  
 Found in IPI00295004, Isoform 1 of Alsin

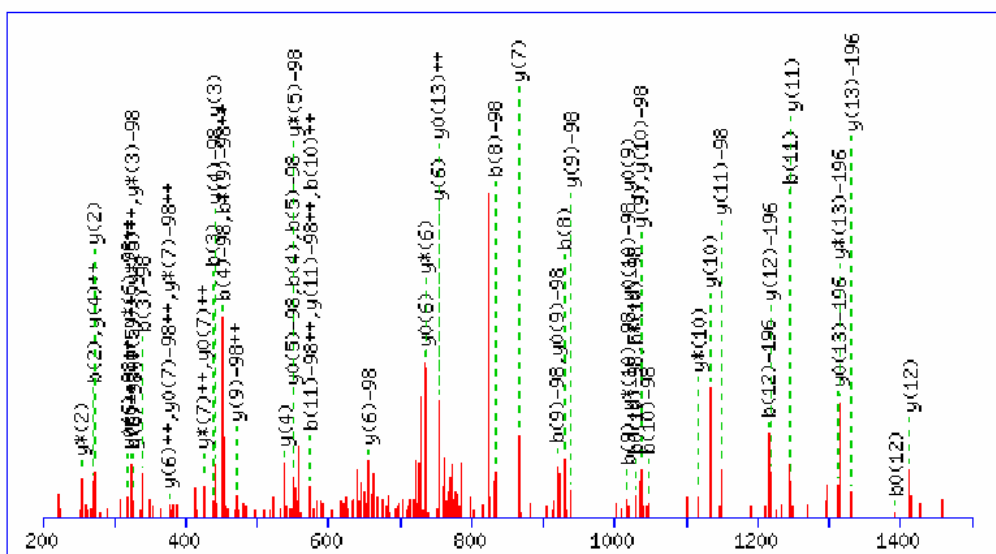

|                        |                                                              |                        |                                                              |                        |                                                               |                        |                                                               |           |                                                 |
|------------------------|--------------------------------------------------------------|------------------------|--------------------------------------------------------------|------------------------|---------------------------------------------------------------|------------------------|---------------------------------------------------------------|-----------|-------------------------------------------------|
| 88.0631 <sup>+2</sup>  | y <sub>1</sub> <sup>+2</sup>                                 | 337.1850 <sup>+2</sup> | y <sub>6</sub> <sup>+2</sup>                                 | 524.3191 <sup>+2</sup> | b <sub>10</sub> -H <sub>3</sub> PO <sub>4</sub> <sup>+2</sup> | 673.3628               | y <sub>6</sub>                                                | 1047.6309 | b <sub>10</sub> -H <sub>3</sub> PO <sub>4</sub> |
| 135.5999 <sup>+2</sup> | b <sub>2</sub> <sup>+2</sup>                                 | 339.2139               | b <sub>3</sub> -H <sub>3</sub> PO <sub>4</sub>               | 527.3062 <sup>+2</sup> | y <sub>10</sub> <sup>+2</sup>                                 | 674.9010 <sup>+2</sup> | y <sub>13</sub> -H <sub>3</sub> PO <sub>4</sub> <sup>+2</sup> | 1053.6051 | y <sub>10</sub>                                 |
| 136.5895 <sup>+2</sup> | y <sub>2</sub> <sup>+2</sup>                                 | 352.6782 <sup>+2</sup> | b <sub>6</sub> <sup>+2</sup>                                 | 549.3507               | b <sub>5</sub> -H <sub>3</sub> PO <sub>4</sub>                | 704.3491               | b <sub>6</sub>                                                | 1145.6078 | b <sub>10</sub>                                 |
| 170.1106 <sup>+2</sup> | b <sub>3</sub> -H <sub>3</sub> PO <sub>4</sub> <sup>+2</sup> | 359.2037               | y <sub>3</sub>                                               | 550.2749               | b <sub>4</sub>                                                | 714.8842 <sup>+2</sup> | b <sub>13</sub> <sup>+2</sup>                                 | 1146.6994 | b <sub>11</sub> -H <sub>3</sub> PO <sub>4</sub> |
| 175.119                | y <sub>1</sub>                                               | 360.2318 <sup>+2</sup> | b <sub>7</sub> -H <sub>3</sub> PO <sub>4</sub> <sup>+2</sup> | 573.3076 <sup>+2</sup> | b <sub>10</sub> <sup>+2</sup>                                 | 719.4563               | b <sub>7</sub> -H <sub>3</sub> PO <sub>4</sub>                | 1166.6892 | y <sub>11</sub>                                 |
| 180.1055 <sup>+2</sup> | y <sub>3</sub> <sup>+2</sup>                                 | 393.7271 <sup>+2</sup> | y <sub>7</sub> <sup>+2</sup>                                 | 573.8533 <sup>+2</sup> | b <sub>11</sub> -H <sub>3</sub> PO <sub>4</sub> <sup>+2</sup> | 723.8894 <sup>+2</sup> | y <sub>13</sub> <sup>+2</sup>                                 | 1233.7314 | b <sub>12</sub> -H <sub>3</sub> PO <sub>4</sub> |
| 219.0990 <sup>+2</sup> | b <sub>3</sub> <sup>+2</sup>                                 | 409.2202 <sup>+2</sup> | b <sub>7</sub> <sup>+2</sup>                                 | 583.8482 <sup>+2</sup> | y <sub>11</sub> <sup>+2</sup>                                 | 752.9515 <sup>+2</sup> | MH-H <sub>3</sub> PO <sub>4</sub> <sup>+2</sup>               | 1235.7106 | y <sub>12</sub> -H <sub>3</sub> PO <sub>4</sub> |
| 226.6526 <sup>+2</sup> | b <sub>4</sub> -H <sub>3</sub> PO <sub>4</sub> <sup>+2</sup> | 416.7738 <sup>+2</sup> | b <sub>8</sub> -H <sub>3</sub> PO <sub>4</sub> <sup>+2</sup> | 586.3307               | y <sub>5</sub>                                                | 786.4468               | y <sub>7</sub>                                                | 1244.6762 | b <sub>11</sub>                                 |
| 229.6397 <sup>+2</sup> | y <sub>4</sub> <sup>+2</sup>                                 | 437.1908               | b <sub>3</sub>                                               | 606.3722               | b <sub>6</sub> -H <sub>3</sub> PO <sub>4</sub>                | 801.9400 <sup>+2</sup> | MH <sup>+2</sup>                                              | 1330.7841 | b <sub>13</sub> -H <sub>3</sub> PO <sub>4</sub> |
| 270.1925               | b <sub>2</sub>                                               | 450.2691 <sup>+2</sup> | y <sub>8</sub> <sup>+2</sup>                                 | 617.3693 <sup>+2</sup> | b <sub>12</sub> -H <sub>3</sub> PO <sub>4</sub> <sup>+2</sup> | 817.4332               | b <sub>7</sub>                                                | 1331.7083 | b <sub>12</sub>                                 |
| 272.1717               | y <sub>2</sub>                                               | 452.298                | b <sub>4</sub> -H <sub>3</sub> PO <sub>4</sub>               | 618.3590 <sup>+2</sup> | y <sub>12</sub> -H <sub>3</sub> PO <sub>4</sub> <sup>+2</sup> | 832.5403               | b <sub>8</sub> -H <sub>3</sub> PO <sub>4</sub>                | 1333.6875 | y <sub>12</sub>                                 |
| 275.1790 <sup>+2</sup> | b <sub>5</sub> -H <sub>3</sub> PO <sub>4</sub> <sup>+2</sup> | 458.2722               | y <sub>4</sub>                                               | 622.8418 <sup>+2</sup> | b <sub>11</sub> <sup>+2</sup>                                 | 899.5309               | y <sub>8</sub>                                                | 1348.7947 | y <sub>13</sub> -H <sub>3</sub> PO <sub>4</sub> |
| 275.6411 <sup>+2</sup> | b <sub>4</sub> <sup>+2</sup>                                 | 460.2898 <sup>+2</sup> | b <sub>9</sub> -H <sub>3</sub> PO <sub>4</sub> <sup>+2</sup> | 647.3276               | b <sub>5</sub>                                                | 919.5724               | b <sub>9</sub> -H <sub>3</sub> PO <sub>4</sub>                | 1428.761  | b <sub>13</sub>                                 |
| 293.6690 <sup>+2</sup> | y <sub>5</sub> <sup>+2</sup>                                 | 465.7623 <sup>+2</sup> | b <sub>8</sub> <sup>+2</sup>                                 | 665.8957 <sup>+2</sup> | b <sub>13</sub> -H <sub>3</sub> PO <sub>4</sub> <sup>+2</sup> | 930.5172               | b <sub>8</sub>                                                | 1446.7716 | y <sub>13</sub>                                 |
| 303.6897 <sup>+2</sup> | b <sub>6</sub> -H <sub>3</sub> PO <sub>4</sub> <sup>+2</sup> | 478.7798 <sup>+2</sup> | y <sub>9</sub> <sup>+2</sup>                                 | 666.3578 <sup>+2</sup> | b <sub>12</sub> <sup>+2</sup>                                 | 956.5524               | y <sub>9</sub>                                                | 1504.8958 | MH-H <sub>3</sub> PO <sub>4</sub>               |
| 324.1675 <sup>+2</sup> | b <sub>5</sub> <sup>+2</sup>                                 | 509.2783 <sup>+2</sup> | b <sub>9</sub> <sup>+2</sup>                                 | 667.3474 <sup>+2</sup> | y <sub>12</sub> <sup>+2</sup>                                 | 1017.5493              | b <sub>9</sub>                                                | 1602.8727 | MH                                              |

MS/MS Fragmentation of QLsSGVSEIR  
 Found in IPI00025512, Heat-shock protein beta-1

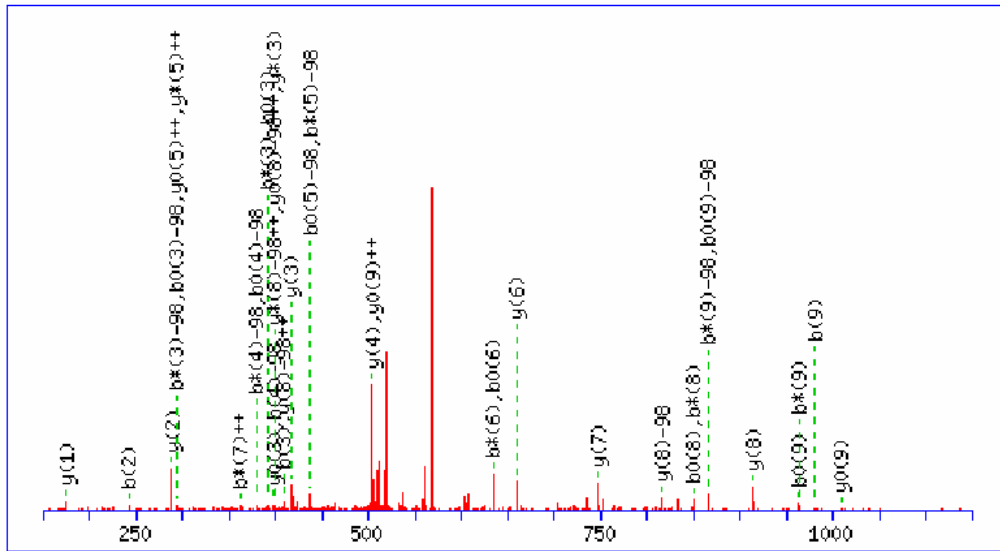

|                        |                                                |                        |                                                              |                        |                                                 |          |                                                |           |                                                |
|------------------------|------------------------------------------------|------------------------|--------------------------------------------------------------|------------------------|-------------------------------------------------|----------|------------------------------------------------|-----------|------------------------------------------------|
| 88.0631 <sup>+2</sup>  | y <sub>1</sub> <sup>+2</sup>                   | 330.6874 <sup>+2</sup> | y <sub>6</sub> <sup>+2</sup>                                 | 496.1803               | b <sub>4</sub>                                  | 652.2702 | b <sub>6</sub>                                 | 929.5051  | y <sub>9</sub> -H <sub>3</sub> PO <sub>4</sub> |
| 144.6051 <sup>+2</sup> | y <sub>2</sub> <sup>+2</sup>                   | 374.2034 <sup>+2</sup> | y <sub>7</sub> <sup>+2</sup>                                 | 504.2776               | y <sub>4</sub>                                  | 660.3675 | y <sub>6</sub>                                 | 981.4289  | b <sub>9</sub>                                 |
| 175.119                | y <sub>1</sub>                                 | 398.2034               | b <sub>4</sub> -H <sub>3</sub> PO <sub>4</sub>               | 514.2446 <sup>+2</sup> | y <sub>9</sub> <sup>+2</sup>                    | 739.3022 | b <sub>7</sub>                                 | 1027.482  | y <sub>9</sub>                                 |
| 209.1264 <sup>+2</sup> | y <sub>3</sub> <sup>+2</sup>                   | 408.7141 <sup>+2</sup> | y <sub>8</sub> -H <sub>3</sub> PO <sub>4</sub> <sup>+2</sup> | 529.2855 <sup>+2</sup> | MH-H <sub>3</sub> PO <sub>4</sub> <sup>+2</sup> | 747.3995 | y <sub>7</sub>                                 | 1057.5636 | MH-H <sub>3</sub> PO <sub>4</sub>              |
| 242.1499               | b <sub>2</sub>                                 | 409.1483               | b <sub>3</sub>                                               | 553.2018               | b <sub>5</sub>                                  | 770.3679 | b <sub>8</sub> -H <sub>3</sub> PO <sub>4</sub> | 1155.5405 | MH                                             |
| 252.6425 <sup>+2</sup> | y <sub>4</sub> <sup>+2</sup>                   | 417.2456               | y <sub>3</sub>                                               | 554.2933               | b <sub>6</sub> -H <sub>3</sub> PO <sub>4</sub>  | 816.421  | y <sub>8</sub> -H <sub>3</sub> PO <sub>4</sub> |           |                                                |
| 288.203                | y <sub>2</sub>                                 | 455.2249               | b <sub>5</sub> -H <sub>3</sub> PO <sub>4</sub>               | 578.2739 <sup>+2</sup> | MH <sup>+2</sup>                                | 868.3448 | b <sub>8</sub>                                 |           |                                                |
| 302.1767 <sup>+2</sup> | y <sub>5</sub> <sup>+2</sup>                   | 457.7026 <sup>+2</sup> | y <sub>8</sub> <sup>+2</sup>                                 | 603.3461               | y <sub>5</sub>                                  | 883.452  | b <sub>9</sub> -H <sub>3</sub> PO <sub>4</sub> |           |                                                |
| 311.1714               | b <sub>3</sub> -H <sub>3</sub> PO <sub>4</sub> | 465.2562 <sup>+2</sup> | y <sub>9</sub> -H <sub>3</sub> PO <sub>4</sub> <sup>+2</sup> | 641.3253               | b <sub>7</sub> -H <sub>3</sub> PO <sub>4</sub>  | 914.3979 | y <sub>8</sub>                                 |           |                                                |

MS/MS Fragmentation of SAsSSWLEGTSTQAK  
 Found in IPI00014340, Myosin binding subunit 85

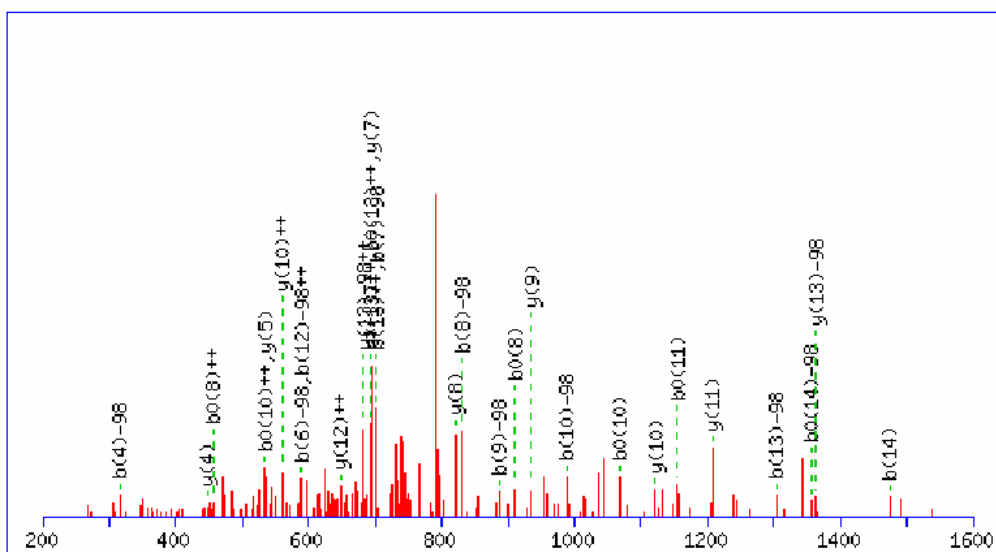

|                        |                                                |                        |                                                |                        |                                                               |           |                                                 |           |                                                 |
|------------------------|------------------------------------------------|------------------------|------------------------------------------------|------------------------|---------------------------------------------------------------|-----------|-------------------------------------------------|-----------|-------------------------------------------------|
| 74.0600 <sup>+2</sup>  | y <sub>1</sub> <sup>+2</sup>                   | 346.6823 <sup>+2</sup> | y <sub>7</sub> <sup>+2</sup>                   | 682.3281 <sup>+2</sup> | y <sub>13</sub> -H <sub>3</sub> PO <sub>4</sub> <sup>+2</sup> | 928.3448  | b <sub>8</sub>                                  | 1363.6488 | y <sub>13</sub> -H <sub>3</sub> PO <sub>4</sub> |
| 109.5786 <sup>+2</sup> | y <sub>2</sub> <sup>+2</sup>                   | 402.1619               | b <sub>5</sub> -H <sub>3</sub> PO <sub>4</sub> | 686.2181               | b <sub>6</sub>                                                | 934.484   | y <sub>9</sub>                                  | 1375.6124 | b <sub>14</sub> -H <sub>3</sub> PO <sub>4</sub> |
| 147.1128               | y <sub>1</sub>                                 | 411.2036 <sup>+2</sup> | y <sub>8</sub> <sup>+2</sup>                   | 692.3573               | y <sub>7</sub>                                                | 985.3663  | b <sub>9</sub>                                  | 1402.5522 | b <sub>13</sub>                                 |
| 159.0764               | b <sub>2</sub>                                 | 413.1068               | b <sub>4</sub>                                 | 701.3253               | b <sub>7</sub> -H <sub>3</sub> PO <sub>4</sub>                | 988.4371  | b <sub>10</sub> -H <sub>3</sub> PO <sub>4</sub> | 1434.6859 | y <sub>14</sub> -H <sub>3</sub> PO <sub>4</sub> |
| 173.6079 <sup>+2</sup> | y <sub>3</sub> <sup>+2</sup>                   | 447.2562               | y <sub>4</sub>                                 | 717.8466 <sup>+2</sup> | y <sub>14</sub> -H <sub>3</sub> PO <sub>4</sub> <sup>+2</sup> | 1075.4691 | b <sub>11</sub> -H <sub>3</sub> PO <sub>4</sub> | 1461.6257 | y <sub>13</sub>                                 |
| 218.1499               | y <sub>2</sub>                                 | 467.7456 <sup>+2</sup> | y <sub>9</sub> <sup>+2</sup>                   | 731.3165 <sup>+2</sup> | y <sub>13</sub> <sup>+2</sup>                                 | 1086.4139 | b <sub>10</sub>                                 | 1473.5893 | b <sub>14</sub>                                 |
| 224.1317 <sup>+2</sup> | y <sub>4</sub> <sup>+2</sup>                   | 500.1388               | b <sub>5</sub>                                 | 761.3626 <sup>+2</sup> | MH-H <sub>3</sub> PO <sub>4</sub> <sup>+2</sup>               | 1120.5633 | y <sub>10</sub>                                 | 1521.718  | MH-H <sub>3</sub> PO <sub>4</sub>               |
| 228.0979               | b <sub>3</sub> -H <sub>3</sub> PO <sub>4</sub> | 534.2882               | y <sub>5</sub>                                 | 766.8351 <sup>+2</sup> | y <sub>14</sub> <sup>+2</sup>                                 | 1173.446  | b <sub>11</sub>                                 | 1532.6628 | y <sub>14</sub>                                 |
| 267.6477 <sup>+2</sup> | y <sub>5</sub> <sup>+2</sup>                   | 560.7853 <sup>+2</sup> | y <sub>10</sub> <sup>+2</sup>                  | 799.3022               | b <sub>7</sub>                                                | 1176.5168 | b <sub>12</sub> -H <sub>3</sub> PO <sub>4</sub> | 1619.6949 | MH                                              |
| 315.1299               | b <sub>4</sub> -H <sub>3</sub> PO <sub>4</sub> | 588.2413               | b <sub>6</sub> -H <sub>3</sub> PO <sub>4</sub> | 810.3511 <sup>+2</sup> | MH <sup>+2</sup>                                              | 1207.5953 | y <sub>11</sub>                                 |           |                                                 |
| 318.1716 <sup>+2</sup> | y <sub>6</sub> <sup>+2</sup>                   | 604.3013 <sup>+2</sup> | y <sub>11</sub> <sup>+2</sup>                  | 821.3999               | y <sub>8</sub>                                                | 1274.4937 | b <sub>12</sub>                                 |           |                                                 |
| 326.0748               | b <sub>3</sub>                                 | 635.3359               | y <sub>6</sub>                                 | 830.3679               | b <sub>8</sub> -H <sub>3</sub> PO <sub>4</sub>                | 1294.6274 | y <sub>12</sub>                                 |           |                                                 |
| 346.2085               | y <sub>3</sub>                                 | 647.8173 <sup>+2</sup> | y <sub>12</sub> <sup>+2</sup>                  | 887.3894               | b <sub>9</sub> -H <sub>3</sub> PO <sub>4</sub>                | 1304.5753 | b <sub>13</sub> -H <sub>3</sub> PO <sub>4</sub> |           |                                                 |

MS/MS Fragmentation of VL(ST)STDLEAAVADALK  
 Found in IPI00396279, CLIP-associating protein 1

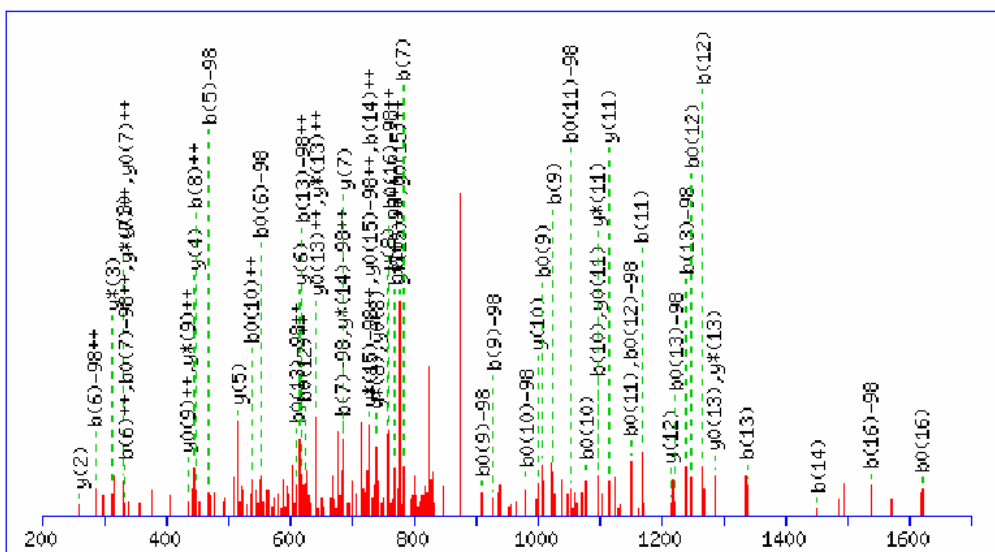

|                        |                                                |                        |                                                |                        |                                                               |           |                                                 |           |                                                 |
|------------------------|------------------------------------------------|------------------------|------------------------------------------------|------------------------|---------------------------------------------------------------|-----------|-------------------------------------------------|-----------|-------------------------------------------------|
| 74.0600 <sup>+2</sup>  | y <sub>1</sub> <sup>+2</sup>                   | 444.2453 <sup>+2</sup> | y <sub>9</sub> <sup>+2</sup>                   | 687.4036               | y <sub>7</sub>                                                | 928.4622  | b <sub>9</sub> -H <sub>3</sub> PO <sub>4</sub>  | 1355.6689 | b <sub>14</sub> -H <sub>3</sub> PO <sub>4</sub> |
| 130.6021 <sup>+2</sup> | y <sub>2</sub> <sup>+2</sup>                   | 446.2609               | y <sub>4</sub>                                 | 693.8592 <sup>+2</sup> | y <sub>14</sub> -H <sub>3</sub> PO <sub>4</sub> <sup>+2</sup> | 999.4993  | b <sub>10</sub> -H <sub>3</sub> PO <sub>4</sub> | 1386.7111 | y <sub>14</sub> -H <sub>3</sub> PO <sub>4</sub> |
| 147.1128               | y <sub>1</sub>                                 | 470.2609               | b <sub>5</sub> -H <sub>3</sub> PO <sub>4</sub> | 737.3752 <sup>+2</sup> | y <sub>15</sub> -H <sub>3</sub> PO <sub>4</sub> <sup>+2</sup> | 1000.5673 | y <sub>10</sub>                                 | 1426.706  | b <sub>15</sub> -H <sub>3</sub> PO <sub>4</sub> |
| 166.1206 <sup>+2</sup> | y <sub>3</sub> <sup>+2</sup>                   | 481.2058               | b <sub>4</sub>                                 | 742.8476 <sup>+2</sup> | y <sub>14</sub> <sup>+2</sup>                                 | 1026.4391 | b <sub>9</sub>                                  | 1453.6458 | b <sub>14</sub>                                 |
| 213.1598               | b <sub>2</sub>                                 | 500.7873 <sup>+2</sup> | y <sub>10</sub> <sup>+2</sup>                  | 758.4407               | y <sub>8</sub>                                                | 1070.5364 | b <sub>11</sub> -H <sub>3</sub> PO <sub>4</sub> | 1473.7431 | y <sub>15</sub> -H <sub>3</sub> PO <sub>4</sub> |
| 223.6341 <sup>+2</sup> | y <sub>4</sub> <sup>+2</sup>                   | 517.298                | y <sub>5</sub>                                 | 784.3124               | b <sub>7</sub>                                                | 1097.4762 | b <sub>10</sub>                                 | 1484.688  | y <sub>14</sub>                                 |
| 259.1527 <sup>+2</sup> | y <sub>5</sub> <sup>+2</sup>                   | 558.3008 <sup>+2</sup> | y <sub>11</sub> <sup>+2</sup>                  | 786.3637 <sup>+2</sup> | y <sub>15</sub> <sup>+2</sup>                                 | 1115.5943 | y <sub>11</sub>                                 | 1524.6829 | b <sub>15</sub>                                 |
| 260.1969               | y <sub>2</sub>                                 | 568.2378               | b <sub>5</sub>                                 | 793.9172 <sup>+2</sup> | y <sub>16</sub> -H <sub>3</sub> PO <sub>4</sub> <sup>+2</sup> | 1168.5133 | b <sub>11</sub>                                 | 1539.7901 | b <sub>16</sub> -H <sub>3</sub> PO <sub>4</sub> |
| 300.1918               | b <sub>3</sub>                                 | 571.3086               | b <sub>6</sub> -H <sub>3</sub> PO <sub>4</sub> | 799.4196               | b <sub>8</sub> -H <sub>3</sub> PO <sub>4</sub>                | 1169.6048 | b <sub>12</sub> -H <sub>3</sub> PO <sub>4</sub> | 1571.72   | y <sub>15</sub>                                 |
| 308.6869 <sup>+2</sup> | y <sub>6</sub> <sup>+2</sup>                   | 608.8246 <sup>+2</sup> | y <sub>12</sub> <sup>+2</sup>                  | 842.9057 <sup>+2</sup> | y <sub>16</sub> <sup>+2</sup>                                 | 1216.642  | y <sub>12</sub>                                 | 1586.8272 | y <sub>16</sub> -H <sub>3</sub> PO <sub>4</sub> |
| 331.234                | y <sub>3</sub>                                 | 616.3665               | y <sub>6</sub>                                 | 843.4514 <sup>+2</sup> | MH-H <sub>3</sub> PO <sub>4</sub> <sup>+2</sup>               | 1240.642  | b <sub>13</sub> -H <sub>3</sub> PO <sub>4</sub> | 1637.767  | b <sub>16</sub>                                 |
| 344.2054 <sup>+2</sup> | y <sub>7</sub> <sup>+2</sup>                   | 652.3406 <sup>+2</sup> | y <sub>13</sub> <sup>+2</sup>                  | 887.4833               | y <sub>9</sub>                                                | 1267.5817 | b <sub>12</sub>                                 | 1684.8041 | y <sub>16</sub>                                 |
| 379.7240 <sup>+2</sup> | y <sub>8</sub> <sup>+2</sup>                   | 669.2855               | b <sub>6</sub>                                 | 892.4399 <sup>+2</sup> | MH <sup>+2</sup>                                              | 1303.674  | y <sub>13</sub>                                 | 1685.8956 | MH-H <sub>3</sub> PO <sub>4</sub>               |
| 383.2289               | b <sub>4</sub> -H <sub>3</sub> PO <sub>4</sub> | 686.3355               | b <sub>7</sub> -H <sub>3</sub> PO <sub>4</sub> | 897.3965               | b <sub>8</sub>                                                | 1338.6189 | b <sub>13</sub>                                 | 1783.8725 | MH                                              |

MS/MS Fragmentation of ECDIVSRDGGGAASPAAtEGR  
 Found in IPI00396279, CLIP-associating protein 1

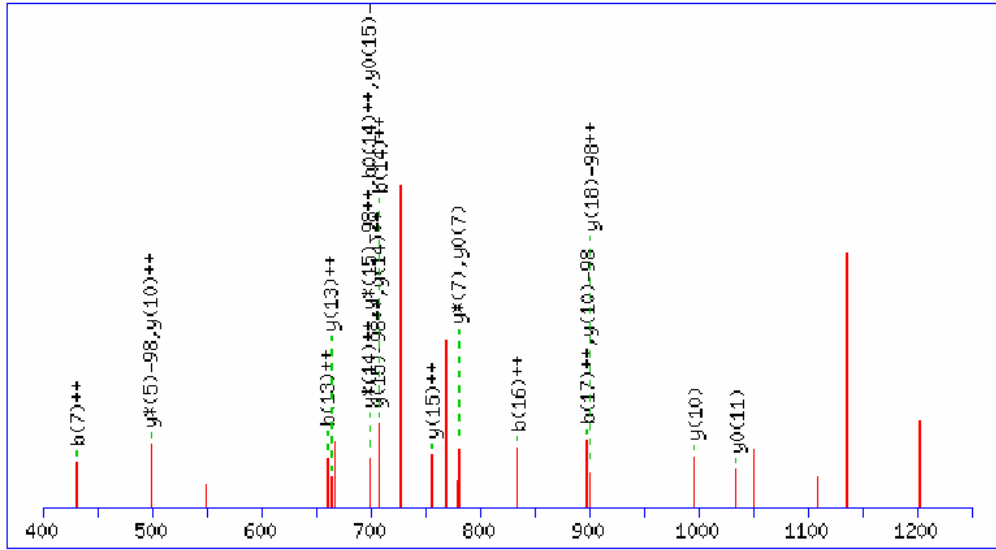

|                        |                                                              |                        |                                                               |                        |                                                               |                        |                                                               |           |                                                 |
|------------------------|--------------------------------------------------------------|------------------------|---------------------------------------------------------------|------------------------|---------------------------------------------------------------|------------------------|---------------------------------------------------------------|-----------|-------------------------------------------------|
| 88.0631 <sup>+2</sup>  | y <sub>1</sub> <sup>+2</sup>                                 | 449.7225 <sup>+2</sup> | y <sub>10</sub> -H <sub>3</sub> PO <sub>4</sub> <sup>+2</sup> | 657.3133 <sup>+2</sup> | y <sub>14</sub> -H <sub>3</sub> PO <sub>4</sub> <sup>+2</sup> | 869.8914 <sup>+2</sup> | y <sub>17</sub> <sup>+2</sup>                                 | 1313.6193 | y <sub>14</sub> -H <sub>3</sub> PO <sub>4</sub> |
| 116.5738 <sup>+2</sup> | y <sub>2</sub> <sup>+2</sup>                                 | 459.7029 <sup>+2</sup> | b <sub>8</sub> <sup>+2</sup>                                  | 662.7857 <sup>+2</sup> | y <sub>13</sub> <sup>+2</sup>                                 | 870.3507 <sup>+2</sup> | b <sub>17</sub> <sup>+2</sup>                                 | 1324.5641 | y <sub>13</sub>                                 |
| 175.119                | y <sub>1</sub>                                               | 461.1701               | b <sub>4</sub>                                                | 679.8039 <sup>+2</sup> | b <sub>14</sub> <sup>+2</sup>                                 | 872.4076 <sup>+2</sup> | y <sub>18</sub> -H <sub>3</sub> PO <sub>4</sub> <sup>+2</sup> | 1358.6005 | b <sub>14</sub>                                 |
| 181.0951 <sup>+2</sup> | y <sub>3</sub> <sup>+2</sup>                                 | 470.2002 <sup>+2</sup> | y <sub>9</sub> <sup>+2</sup>                                  | 699.342                | y <sub>7</sub> -H <sub>3</sub> PO <sub>4</sub>                | 898.4377               | y <sub>10</sub> -H <sub>3</sub> PO <sub>4</sub>               | 1411.5962 | y <sub>14</sub>                                 |
| 222.6137 <sup>+2</sup> | y <sub>4</sub> -H <sub>3</sub> PO <sub>4</sub> <sup>+2</sup> | 478.2332 <sup>+2</sup> | y <sub>11</sub> -H <sub>3</sub> PO <sub>4</sub> <sup>+2</sup> | 706.3017 <sup>+2</sup> | y <sub>14</sub> <sup>+2</sup>                                 | 898.8615 <sup>+2</sup> | b <sub>18</sub> <sup>+2</sup>                                 | 1412.6877 | y <sub>15</sub> -H <sub>3</sub> PO <sub>4</sub> |
| 232.1404               | y <sub>2</sub>                                               | 488.2136 <sup>+2</sup> | b <sub>9</sub> <sup>+2</sup>                                  | 706.8475 <sup>+2</sup> | y <sub>15</sub> -H <sub>3</sub> PO <sub>4</sub> <sup>+2</sup> | 918.3986               | b <sub>8</sub>                                                | 1429.6376 | b <sub>15</sub>                                 |
| 233.0591               | b <sub>2</sub>                                               | 498.7109 <sup>+2</sup> | y <sub>10</sub> <sup>+2</sup>                                 | 710.2869               | y <sub>6</sub>                                                | 921.3960 <sup>+2</sup> | y <sub>18</sub> <sup>+2</sup>                                 | 1510.6646 | y <sub>15</sub>                                 |
| 258.1323 <sup>+2</sup> | y <sub>5</sub> -H <sub>3</sub> PO <sub>4</sub> <sup>+2</sup> | 515.2572               | y <sub>5</sub> -H <sub>3</sub> PO <sub>4</sub>                | 715.3224 <sup>+2</sup> | b <sub>15</sub> <sup>+2</sup>                                 | 936.9289 <sup>+2</sup> | MH-H <sub>3</sub> PO <sub>4</sub> <sup>+2</sup>               | 1512.6747 | b <sub>16</sub> -H <sub>3</sub> PO <sub>4</sub> |
| 271.6021 <sup>+2</sup> | y <sub>4</sub> <sup>+2</sup>                                 | 516.7244 <sup>+2</sup> | b <sub>10</sub> <sup>+2</sup>                                 | 755.8359 <sup>+2</sup> | y <sub>15</sub> <sup>+2</sup>                                 | 939.3932               | y <sub>9</sub>                                                | 1525.7717 | y <sub>16</sub> -H <sub>3</sub> PO <sub>4</sub> |
| 306.6586 <sup>+2</sup> | y <sub>6</sub> -H <sub>3</sub> PO <sub>4</sub> <sup>+2</sup> | 527.2217 <sup>+2</sup> | y <sub>11</sub> <sup>+2</sup>                                 | 756.8410 <sup>+2</sup> | b <sub>16</sub> -H <sub>3</sub> PO <sub>4</sub> <sup>+2</sup> | 955.4592               | y <sub>11</sub> -H <sub>3</sub> PO <sub>4</sub>               | 1610.6516 | b <sub>16</sub>                                 |
| 307.1207 <sup>+2</sup> | y <sub>5</sub> <sup>+2</sup>                                 | 535.7467 <sup>+2</sup> | y <sub>12</sub> -H <sub>3</sub> PO <sub>4</sub> <sup>+2</sup> | 763.3895 <sup>+2</sup> | y <sub>16</sub> -H <sub>3</sub> PO <sub>4</sub> <sup>+2</sup> | 975.42                 | b <sub>9</sub>                                                | 1623.7486 | y <sub>16</sub>                                 |
| 348.086                | b <sub>3</sub>                                               | 542.197                | y <sub>4</sub>                                                | 770.3791               | y <sub>8</sub> -H <sub>3</sub> PO <sub>4</sub>                | 985.9173 <sup>+2</sup> | MH <sup>+2</sup>                                              | 1640.7987 | y <sub>17</sub> -H <sub>3</sub> PO <sub>4</sub> |
| 350.1747 <sup>+2</sup> | y <sub>7</sub> -H <sub>3</sub> PO <sub>4</sub> <sup>+2</sup> | 552.2429 <sup>+2</sup> | b <sub>11</sub> <sup>+2</sup>                                 | 797.3189               | y <sub>7</sub>                                                | 996.4146               | y <sub>10</sub>                                               | 1641.7173 | b <sub>17</sub> -H <sub>3</sub> PO <sub>4</sub> |
| 355.6471 <sup>+2</sup> | y <sub>6</sub> <sup>+2</sup>                                 | 560.2385               | b <sub>5</sub>                                                | 803.3716               | b <sub>7</sub>                                                | 1032.4415              | b <sub>10</sub>                                               | 1698.7388 | b <sub>18</sub> -H <sub>3</sub> PO <sub>4</sub> |
| 361.183                | y <sub>3</sub>                                               | 584.7351 <sup>+2</sup> | y <sub>12</sub> <sup>+2</sup>                                 | 805.8295 <sup>+2</sup> | b <sub>16</sub> <sup>+2</sup>                                 | 1053.4361              | y <sub>11</sub>                                               | 1738.7756 | y <sub>17</sub>                                 |
| 385.6932 <sup>+2</sup> | y <sub>8</sub> -H <sub>3</sub> PO <sub>4</sub> <sup>+2</sup> | 587.7615 <sup>+2</sup> | b <sub>12</sub> <sup>+2</sup>                                 | 812.3780 <sup>+2</sup> | y <sub>16</sub> <sup>+2</sup>                                 | 1070.4861              | y <sub>12</sub> -H <sub>3</sub> PO <sub>4</sub>               | 1739.6942 | b <sub>17</sub>                                 |
| 399.1631 <sup>+2</sup> | y <sub>7</sub> <sup>+2</sup>                                 | 612.31                 | y <sub>6</sub> -H <sub>3</sub> PO <sub>4</sub>                | 820.9030 <sup>+2</sup> | y <sub>17</sub> -H <sub>3</sub> PO <sub>4</sub> <sup>+2</sup> | 1103.4786              | b <sub>11</sub>                                               | 1743.8079 | y <sub>18</sub> -H <sub>3</sub> PO <sub>4</sub> |
| 402.1894 <sup>+2</sup> | b <sub>7</sub> <sup>+2</sup>                                 | 613.2341               | y <sub>5</sub>                                                | 821.3623 <sup>+2</sup> | b <sub>17</sub> -H <sub>3</sub> PO <sub>4</sub> <sup>+2</sup> | 1168.463               | y <sub>12</sub>                                               | 1796.7157 | b <sub>18</sub>                                 |
| 421.2118 <sup>+2</sup> | y <sub>9</sub> -H <sub>3</sub> PO <sub>4</sub> <sup>+2</sup> | 613.7973 <sup>+2</sup> | y <sub>13</sub> -H <sub>3</sub> PO <sub>4</sub> <sup>+2</sup> | 841.4163               | y <sub>9</sub> -H <sub>3</sub> PO <sub>4</sub>                | 1174.5157              | b <sub>12</sub>                                               | 1841.7848 | y <sub>18</sub>                                 |
| 434.6817 <sup>+2</sup> | y <sub>8</sub> <sup>+2</sup>                                 | 631.2775 <sup>+2</sup> | b <sub>13</sub> <sup>+2</sup>                                 | 849.8730 <sup>+2</sup> | b <sub>18</sub> -H <sub>3</sub> PO <sub>4</sub> <sup>+2</sup> | 1226.5872              | y <sub>13</sub> -H <sub>3</sub> PO <sub>4</sub>               | 1872.8505 | MH-H <sub>3</sub> PO <sub>4</sub>               |
| 444.2201               | y <sub>4</sub> -H <sub>3</sub> PO <sub>4</sub>               | 647.2705               | b <sub>6</sub>                                                | 868.356                | y <sub>8</sub>                                                | 1261.5477              | b <sub>13</sub>                                               | 1970.8274 | MH                                              |

MS/MS Fragmentation of GVGsPEPGPTAPYLGR  
 Found in IPI00216546, Isoform 2 of Probable palmitoyltransferase ZDHHC5

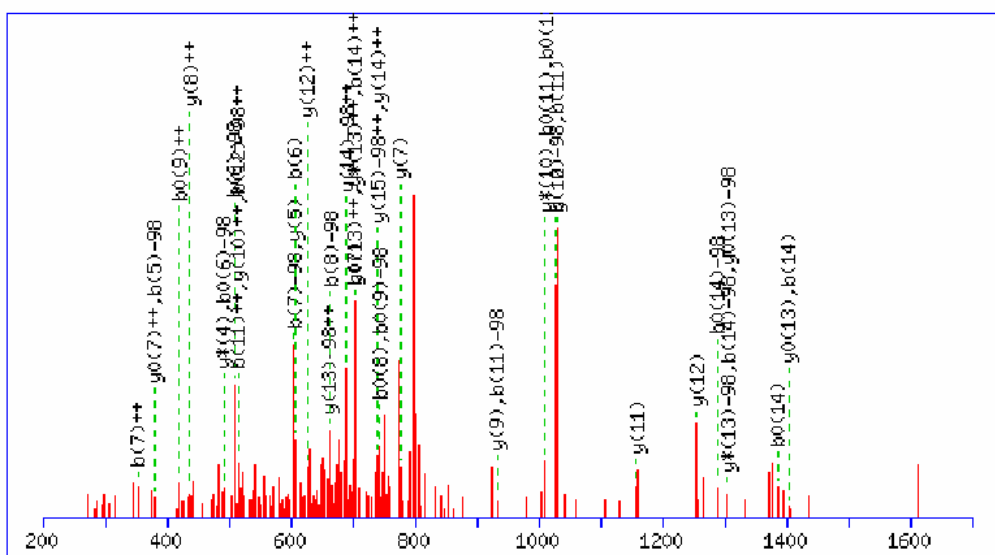

|                        |                                                |                        |                                                               |                        |                                                               |           |                                                 |           |                                                 |
|------------------------|------------------------------------------------|------------------------|---------------------------------------------------------------|------------------------|---------------------------------------------------------------|-----------|-------------------------------------------------|-----------|-------------------------------------------------|
| 88.0631 <sup>+2</sup>  | y <sub>1</sub> <sup>+2</sup>                   | 389.2163 <sup>+2</sup> | y <sub>7</sub> <sup>+2</sup>                                  | 676.3777               | y <sub>6</sub>                                                | 874.4781  | y <sub>8</sub>                                  | 1362.6688 | b <sub>15</sub> -H <sub>3</sub> PO <sub>4</sub> |
| 116.5738 <sup>+2</sup> | y <sub>2</sub> <sup>+2</sup>                   | 437.7427 <sup>+2</sup> | y <sub>8</sub> <sup>+2</sup>                                  | 690.8490 <sup>+2</sup> | y <sub>14</sub> -H <sub>3</sub> PO <sub>4</sub> <sup>+2</sup> | 931.4996  | y <sub>9</sub>                                  | 1380.6906 | y <sub>14</sub> -H <sub>3</sub> PO <sub>4</sub> |
| 157.0972               | b <sub>2</sub>                                 | 466.2534 <sup>+2</sup> | y <sub>9</sub> <sup>+2</sup>                                  | 704.2651               | b <sub>7</sub>                                                | 932.4472  | b <sub>11</sub> -H <sub>3</sub> PO <sub>4</sub> | 1403.6243 | b <sub>14</sub>                                 |
| 173.1159 <sup>+2</sup> | y <sub>3</sub> <sup>+2</sup>                   | 478.1697               | b <sub>5</sub>                                                | 711.3267 <sup>+2</sup> | y <sub>13</sub> <sup>+2</sup>                                 | 959.387   | b <sub>10</sub>                                 | 1421.6461 | y <sub>13</sub>                                 |
| 175.119                | y <sub>1</sub>                                 | 508.2878               | y <sub>4</sub>                                                | 739.8374 <sup>+2</sup> | y <sub>14</sub> <sup>+2</sup>                                 | 1028.5524 | y <sub>10</sub>                                 | 1460.6457 | b <sub>15</sub>                                 |
| 214.1186               | b <sub>3</sub>                                 | 509.2354               | b <sub>6</sub> -H <sub>3</sub> PO <sub>4</sub>                | 740.3832 <sup>+2</sup> | y <sub>15</sub> -H <sub>3</sub> PO <sub>4</sub> <sup>+2</sup> | 1029.5    | b <sub>12</sub> -H <sub>3</sub> PO <sub>4</sub> | 1478.6675 | y <sub>14</sub>                                 |
| 232.1404               | y <sub>2</sub>                                 | 514.7798 <sup>+2</sup> | y <sub>10</sub> <sup>+2</sup>                                 | 760.3624               | b <sub>9</sub> -H <sub>3</sub> PO <sub>4</sub>                | 1030.4241 | b <sub>11</sub>                                 | 1479.7591 | y <sub>15</sub> -H <sub>3</sub> PO <sub>4</sub> |
| 254.6475 <sup>+2</sup> | y <sub>4</sub> <sup>+2</sup>                   | 579.3011 <sup>+2</sup> | y <sub>11</sub> <sup>+2</sup>                                 | 761.2866               | b <sub>8</sub>                                                | 1127.4769 | b <sub>12</sub>                                 | 1536.7805 | MH-H <sub>3</sub> PO <sub>4</sub>               |
| 283.1401               | b <sub>4</sub> -H <sub>3</sub> PO <sub>4</sub> | 605.3406               | y <sub>5</sub>                                                | 768.8939 <sup>+2</sup> | MH-H <sub>3</sub> PO <sub>4</sub> <sup>+2</sup>               | 1157.5949 | y <sub>11</sub>                                 | 1577.7359 | y <sub>15</sub>                                 |
| 303.1739 <sup>+2</sup> | y <sub>5</sub> <sup>+2</sup>                   | 606.2882               | b <sub>7</sub> -H <sub>3</sub> PO <sub>4</sub>                | 777.4254               | y <sub>7</sub>                                                | 1192.5633 | b <sub>13</sub> -H <sub>3</sub> PO <sub>4</sub> | 1634.7574 | MH                                              |
| 338.6925 <sup>+2</sup> | y <sub>6</sub> <sup>+2</sup>                   | 607.2123               | b <sub>6</sub>                                                | 789.3716 <sup>+2</sup> | y <sub>15</sub> <sup>+2</sup>                                 | 1254.6477 | y <sub>12</sub>                                 |           |                                                 |
| 345.2245               | y <sub>3</sub>                                 | 627.8275 <sup>+2</sup> | y <sub>12</sub> <sup>+2</sup>                                 | 817.8823 <sup>+2</sup> | MH <sup>+2</sup>                                              | 1290.5402 | b <sub>13</sub>                                 |           |                                                 |
| 380.1928               | b <sub>5</sub> -H <sub>3</sub> PO <sub>4</sub> | 662.3382 <sup>+2</sup> | y <sub>13</sub> -H <sub>3</sub> PO <sub>4</sub> <sup>+2</sup> | 858.3393               | b <sub>9</sub>                                                | 1305.6474 | b <sub>14</sub> -H <sub>3</sub> PO <sub>4</sub> |           |                                                 |
| 381.117                | b <sub>4</sub>                                 | 663.3097               | b <sub>8</sub> -H <sub>3</sub> PO <sub>4</sub>                | 861.4101               | b <sub>10</sub> -H <sub>3</sub> PO <sub>4</sub>               | 1323.6692 | y <sub>13</sub> -H <sub>3</sub> PO <sub>4</sub> |           |                                                 |



MS/MS Fragmentation of LLRQsPPLPGREEEPGLGDSGIQSTPGSGHAPR  
 Found in IPI00328272, Isoform 1 of Probable palmitoyltransferase ZDHHC5

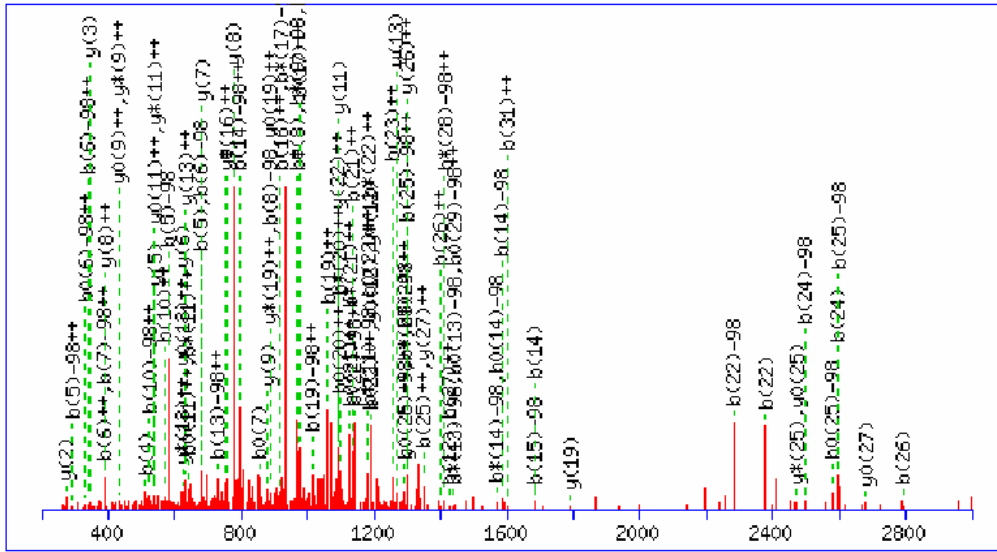

|                        |                                                               |                         |                                                               |                         |                                                               |                         |                                                               |           |                                                 |
|------------------------|---------------------------------------------------------------|-------------------------|---------------------------------------------------------------|-------------------------|---------------------------------------------------------------|-------------------------|---------------------------------------------------------------|-----------|-------------------------------------------------|
| 88.0631 <sup>+2</sup>  | y <sub>1</sub> <sup>+2</sup>                                  | 663.8857 <sup>+2</sup>  | b <sub>12</sub> -H <sub>3</sub> PO <sub>4</sub> <sup>+2</sup> | 1084.5584 <sup>+2</sup> | b <sub>21</sub> -H <sub>3</sub> PO <sub>4</sub> <sup>+2</sup> | 1497.2218 <sup>+2</sup> | b <sub>29</sub> <sup>+2</sup>                                 | 2334.1069 | y <sub>23</sub>                                 |
| 136.5895 <sup>+2</sup> | y <sub>2</sub> <sup>+2</sup>                                  | 676.3393 <sup>+2</sup>  | y <sub>14</sub> <sup>+2</sup>                                 | 1089.5065 <sup>+2</sup> | y <sub>22</sub> <sup>+2</sup>                                 | 1516.7629 <sup>+2</sup> | b <sub>30</sub> -H <sub>3</sub> PO <sub>4</sub> <sup>+2</sup> | 2379.1704 | b <sub>22</sub>                                 |
| 172.1081 <sup>+2</sup> | y <sub>3</sub> <sup>+2</sup>                                  | 677.4093                | b <sub>6</sub> -H <sub>3</sub> PO <sub>4</sub>                | 1094.5337               | y <sub>11</sub>                                               | 1523.7197               | y <sub>16</sub>                                               | 2391.1284 | y <sub>24</sub>                                 |
| 175.119                | y <sub>1</sub>                                                | 678.3335                | b <sub>5</sub>                                                | 1105.0361 <sup>+2</sup> | b <sub>20</sub> <sup>+2</sup>                                 | 1545.7175 <sup>+2</sup> | y <sub>30</sub> <sup>+2</sup>                                 | 2409.2521 | b <sub>23</sub> -H <sub>3</sub> PO <sub>4</sub> |
| 192.1419 <sup>+2</sup> | b <sub>3</sub> <sup>+2</sup>                                  | 681.3427                | y <sub>7</sub>                                                | 1133.5468 <sup>+2</sup> | b <sub>21</sub> <sup>+2</sup>                                 | 1552.2814 <sup>+2</sup> | b <sub>31</sub> -H <sub>3</sub> PO <sub>4</sub> <sup>+2</sup> | 2488.1811 | y <sub>25</sub>                                 |
| 227.1754               | b <sub>2</sub>                                                | 712.8741 <sup>+2</sup>  | b <sub>12</sub> <sup>+2</sup>                                 | 1139.5973               | b <sub>10</sub>                                               | 1553.7836               | b <sub>13</sub>                                               | 2496.2841 | b <sub>24</sub> -H <sub>3</sub> PO <sub>4</sub> |
| 240.6375 <sup>+2</sup> | y <sub>4</sub> <sup>+2</sup>                                  | 728.4070 <sup>+2</sup>  | b <sub>13</sub> -H <sub>3</sub> PO <sub>4</sub> <sup>+2</sup> | 1141.1004 <sup>+2</sup> | b <sub>22</sub> -H <sub>3</sub> PO <sub>4</sub> <sup>+2</sup> | 1565.7513 <sup>+2</sup> | b <sub>30</sub> <sup>+2</sup>                                 | 2507.229  | b <sub>23</sub>                                 |
| 256.1712 <sup>+2</sup> | b <sub>4</sub> <sup>+2</sup>                                  | 733.8528 <sup>+2</sup>  | y <sub>15</sub> <sup>+2</sup>                                 | 1167.5571 <sup>+2</sup> | y <sub>23</sub> <sup>+2</sup>                                 | 1574.7796 <sup>+2</sup> | y <sub>31</sub> -H <sub>3</sub> PO <sub>4</sub> <sup>+2</sup> | 2594.261  | b <sub>24</sub>                                 |
| 269.1482 <sup>+2</sup> | y <sub>5</sub> <sup>+2</sup>                                  | 762.3635 <sup>+2</sup>  | y <sub>16</sub> <sup>+2</sup>                                 | 1190.0888 <sup>+2</sup> | b <sub>22</sub> <sup>+2</sup>                                 | 1584.8493               | b <sub>14</sub> -H <sub>3</sub> PO <sub>4</sub>               | 2597.3318 | b <sub>25</sub> -H <sub>3</sub> PO <sub>4</sub> |
| 272.1717               | y <sub>2</sub>                                                | 774.4621                | b <sub>7</sub> -H <sub>3</sub> PO <sub>4</sub>                | 1196.0678 <sup>+2</sup> | y <sub>24</sub> <sup>+2</sup>                                 | 1600.8078 <sup>+2</sup> | b <sub>32</sub> -H <sub>3</sub> PO <sub>4</sub> <sup>+2</sup> | 2601.2652 | y <sub>26</sub>                                 |
| 290.6819 <sup>+2</sup> | b <sub>5</sub> -H <sub>3</sub> PO <sub>4</sub> <sup>+2</sup>  | 775.3862                | b <sub>6</sub>                                                | 1197.7215               | b <sub>11</sub> -H <sub>3</sub> PO <sub>4</sub>               | 1601.2699 <sup>+2</sup> | b <sub>31</sub> <sup>+2</sup>                                 | 2694.3846 | b <sub>26</sub> -H <sub>3</sub> PO <sub>4</sub> |
| 312.6643 <sup>+2</sup> | y <sub>6</sub> <sup>+2</sup>                                  | 777.3954 <sup>+2</sup>  | b <sub>13</sub> <sup>+2</sup>                                 | 1205.1297 <sup>+2</sup> | b <sub>23</sub> -H <sub>3</sub> PO <sub>4</sub> <sup>+2</sup> | 1623.7680 <sup>+2</sup> | y <sub>31</sub> <sup>+2</sup>                                 | 2695.3087 | b <sub>25</sub>                                 |
| 339.2083 <sup>+2</sup> | b <sub>6</sub> -H <sub>3</sub> PO <sub>4</sub> <sup>+2</sup>  | 778.3955                | y <sub>8</sub>                                                | 1207.6178               | y <sub>12</sub>                                               | 1631.3216 <sup>+2</sup> | y <sub>32</sub> -H <sub>3</sub> PO <sub>4</sub> <sup>+2</sup> | 2698.3179 | y <sub>27</sub>                                 |
| 339.6704 <sup>+2</sup> | b <sub>5</sub> <sup>+2</sup>                                  | 792.9283 <sup>+2</sup>  | b <sub>14</sub> -H <sub>3</sub> PO <sub>4</sub> <sup>+2</sup> | 1244.5942 <sup>+2</sup> | y <sub>25</sub> <sup>+2</sup>                                 | 1636.8038               | y <sub>17</sub>                                               | 2751.406  | b <sub>27</sub> -H <sub>3</sub> PO <sub>4</sub> |
| 341.1750 <sup>+2</sup> | y <sub>7</sub> <sup>+2</sup>                                  | 818.9055 <sup>+2</sup>  | y <sub>17</sub> <sup>+2</sup>                                 | 1248.6457 <sup>+2</sup> | b <sub>24</sub> -H <sub>3</sub> PO <sub>4</sub> <sup>+2</sup> | 1649.7962 <sup>+2</sup> | b <sub>32</sub> <sup>+2</sup>                                 | 2792.3615 | b <sub>26</sub>                                 |
| 343.2088               | y <sub>3</sub>                                                | 841.4547 <sup>+2</sup>  | b <sub>15</sub> -H <sub>3</sub> PO <sub>4</sub> <sup>+2</sup> | 1254.1181 <sup>+2</sup> | b <sub>23</sub> <sup>+2</sup>                                 | 1680.3100 <sup>+2</sup> | y <sub>32</sub> <sup>+2</sup>                                 | 2795.3707 | y <sub>28</sub>                                 |
| 383.2765               | b <sub>3</sub>                                                | 841.9167 <sup>+2</sup>  | b <sub>14</sub> <sup>+2</sup>                                 | 1264.6393               | y <sub>13</sub>                                               | 1681.902                | b <sub>15</sub> -H <sub>3</sub> PO <sub>4</sub>               | 2838.4381 | b <sub>28</sub> -H <sub>3</sub> PO <sub>4</sub> |
| 387.7347 <sup>+2</sup> | b <sub>7</sub> -H <sub>3</sub> PO <sub>4</sub> <sup>+2</sup>  | 847.4163 <sup>+2</sup>  | y <sub>18</sub> <sup>+2</sup>                                 | 1295.6984               | b <sub>11</sub>                                               | 1682.8262               | b <sub>14</sub>                                               | 2849.3829 | b <sub>27</sub>                                 |
| 388.1967 <sup>+2</sup> | b <sub>6</sub> <sup>+2</sup>                                  | 869.9654 <sup>+2</sup>  | b <sub>16</sub> -H <sub>3</sub> PO <sub>4</sub> <sup>+2</sup> | 1297.6341 <sup>+2</sup> | b <sub>24</sub> <sup>+2</sup>                                 | 1687.8636 <sup>+2</sup> | MH-H <sub>3</sub> PO <sub>4</sub> <sup>+2</sup>               | 2864.3922 | y <sub>29</sub> -H <sub>3</sub> PO <sub>4</sub> |
| 389.7014 <sup>+2</sup> | y <sub>8</sub> <sup>+2</sup>                                  | 872.439                 | b <sub>7</sub>                                                | 1299.1695 <sup>+2</sup> | b <sub>25</sub> -H <sub>3</sub> PO <sub>4</sub> <sup>+2</sup> | 1693.8252               | y <sub>18</sub>                                               | 2895.4595 | b <sub>29</sub> -H <sub>3</sub> PO <sub>4</sub> |
| 436.7231 <sup>+2</sup> | b <sub>7</sub> <sup>+2</sup>                                  | 879.4431                | y <sub>9</sub>                                                | 1301.1362 <sup>+2</sup> | y <sub>26</sub> <sup>+2</sup>                                 | 1736.8521 <sup>+2</sup> | MH <sup>+2</sup>                                              | 2936.415  | b <sub>28</sub>                                 |
| 440.2252 <sup>+2</sup> | y <sub>9</sub> <sup>+2</sup>                                  | 887.5461                | b <sub>8</sub> -H <sub>3</sub> PO <sub>4</sub>                | 1326.7641               | b <sub>12</sub> -H <sub>3</sub> PO <sub>4</sub>               | 1738.9235               | b <sub>16</sub> -H <sub>3</sub> PO <sub>4</sub>               | 2962.3691 | y <sub>29</sub>                                 |
| 444.2767 <sup>+2</sup> | b <sub>8</sub> -H <sub>3</sub> PO <sub>4</sub> <sup>+2</sup>  | 890.4431 <sup>+2</sup>  | b <sub>15</sub> <sup>+2</sup>                                 | 1347.6959 <sup>+2</sup> | b <sub>26</sub> -H <sub>3</sub> PO <sub>4</sub> <sup>+2</sup> | 1779.8789               | b <sub>15</sub>                                               | 2992.4508 | y <sub>30</sub> -H <sub>3</sub> PO <sub>4</sub> |
| 480.2677               | y <sub>4</sub>                                                | 895.9426 <sup>+2</sup>  | y <sub>19</sub> <sup>+2</sup>                                 | 1348.1580 <sup>+2</sup> | b <sub>25</sub> <sup>+2</sup>                                 | 1790.878                | y <sub>19</sub>                                               | 2993.4364 | b <sub>29</sub>                                 |
| 483.7412 <sup>+2</sup> | y <sub>10</sub> <sup>+2</sup>                                 | 918.9538 <sup>+2</sup>  | b <sub>16</sub> <sup>+2</sup>                                 | 1349.6626 <sup>+2</sup> | y <sub>27</sub> <sup>+2</sup>                                 | 1836.9004               | b <sub>16</sub>                                               | 3032.5184 | b <sub>30</sub> -H <sub>3</sub> PO <sub>4</sub> |
| 492.8031 <sup>+2</sup> | b <sub>9</sub> -H <sub>3</sub> PO <sub>4</sub> <sup>+2</sup>  | 926.5074 <sup>+2</sup>  | b <sub>17</sub> -H <sub>3</sub> PO <sub>4</sub> <sup>+2</sup> | 1351.6713               | y <sub>14</sub>                                               | 1852.0076               | b <sub>17</sub> -H <sub>3</sub> PO <sub>4</sub>               | 3090.4276 | y <sub>30</sub>                                 |
| 493.2652 <sup>+2</sup> | b <sub>8</sub> <sup>+2</sup>                                  | 955.0181 <sup>+2</sup>  | b <sub>18</sub> -H <sub>3</sub> PO <sub>4</sub> <sup>+2</sup> | 1376.2067 <sup>+2</sup> | b <sub>27</sub> -H <sub>3</sub> PO <sub>4</sub> <sup>+2</sup> | 1909.029                | b <sub>18</sub> -H <sub>3</sub> PO <sub>4</sub>               | 3103.5556 | b <sub>31</sub> -H <sub>3</sub> PO <sub>4</sub> |
| 511.3351               | b <sub>4</sub>                                                | 960.4639 <sup>+2</sup>  | y <sub>20</sub> <sup>+2</sup>                                 | 1396.6844 <sup>+2</sup> | b <sub>26</sub> <sup>+2</sup>                                 | 1919.9206               | y <sub>20</sub>                                               | 3130.4953 | b <sub>30</sub>                                 |
| 521.3138 <sup>+2</sup> | b <sub>10</sub> -H <sub>3</sub> PO <sub>4</sub> <sup>+2</sup> | 966.4752                | y <sub>10</sub>                                               | 1398.1890 <sup>+2</sup> | y <sub>28</sub> <sup>+2</sup>                                 | 1949.9845               | b <sub>17</sub>                                               | 3148.5519 | y <sub>31</sub> -H <sub>3</sub> PO <sub>4</sub> |
| 537.2892               | y <sub>5</sub>                                                | 975.4959 <sup>+2</sup>  | b <sub>17</sub> <sup>+2</sup>                                 | 1419.7227 <sup>+2</sup> | b <sub>28</sub> -H <sub>3</sub> PO <sub>4</sub> <sup>+2</sup> | 2007.0059               | b <sub>18</sub>                                               | 3200.6083 | b <sub>32</sub> -H <sub>3</sub> PO <sub>4</sub> |
| 541.7915 <sup>+2</sup> | b <sub>9</sub> <sup>+2</sup>                                  | 984.5989                | b <sub>9</sub> -H <sub>3</sub> PO <sub>4</sub>                | 1424.741                | b <sub>12</sub>                                               | 2024.056                | b <sub>19</sub> -H <sub>3</sub> PO <sub>4</sub>               | 3201.5324 | b <sub>31</sub>                                 |
| 547.7705 <sup>+2</sup> | y <sub>11</sub> <sup>+2</sup>                                 | 985.523                 | b <sub>8</sub>                                                | 1425.1951 <sup>+2</sup> | b <sub>27</sub> <sup>+2</sup>                                 | 2048.9632               | y <sub>21</sub>                                               | 3246.5288 | y <sub>31</sub>                                 |
| 570.3023 <sup>+2</sup> | b <sub>10</sub> <sup>+2</sup>                                 | 1004.0066 <sup>+2</sup> | b <sub>18</sub> <sup>+2</sup>                                 | 1432.6997 <sup>+2</sup> | y <sub>29</sub> -H <sub>3</sub> PO <sub>4</sub> <sup>+2</sup> | 2111.088                | b <sub>20</sub> -H <sub>3</sub> PO <sub>4</sub>               | 3261.6359 | y <sub>32</sub> -H <sub>3</sub> PO <sub>4</sub> |
| 580.3566               | b <sub>5</sub> -H <sub>3</sub> PO <sub>4</sub>                | 1012.5316 <sup>+2</sup> | b <sub>19</sub> -H <sub>3</sub> PO <sub>4</sub> <sup>+2</sup> | 1448.2334 <sup>+2</sup> | b <sub>29</sub> -H <sub>3</sub> PO <sub>4</sub> <sup>+2</sup> | 2122.0329               | b <sub>19</sub>                                               | 3298.5852 | b <sub>32</sub>                                 |
| 599.3644 <sup>+2</sup> | b <sub>11</sub> -H <sub>3</sub> PO <sub>4</sub> <sup>+2</sup> | 1024.9852 <sup>+2</sup> | y <sub>21</sub> <sup>+2</sup>                                 | 1455.8067               | b <sub>13</sub> -H <sub>3</sub> PO <sub>4</sub>               | 2168.1095               | b <sub>21</sub> -H <sub>3</sub> PO <sub>4</sub>               | 3359.6128 | y <sub>32</sub>                                 |
| 604.3125 <sup>+2</sup> | y <sub>12</sub> <sup>+2</sup>                                 | 1041.6204               | b <sub>10</sub> -H <sub>3</sub> PO <sub>4</sub>               | 1466.6982               | y <sub>15</sub>                                               | 2178.0058               | y <sub>22</sub>                                               | 3374.72   | MH-H <sub>3</sub> PO <sub>4</sub>               |
| 624.3212               | y <sub>6</sub>                                                | 1056.0476 <sup>+2</sup> | b <sub>20</sub> -H <sub>3</sub> PO <sub>4</sub> <sup>+2</sup> | 1468.7111 <sup>+2</sup> | b <sub>28</sub> <sup>+2</sup>                                 | 2209.0649               | b <sub>20</sub>                                               | 3472.6969 | MH                                              |
| 632.8233 <sup>+2</sup> | y <sub>13</sub> <sup>+2</sup>                                 | 1061.5201 <sup>+2</sup> | b <sub>19</sub> <sup>+2</sup>                                 | 1481.6882 <sup>+2</sup> | y <sub>29</sub> <sup>+2</sup>                                 | 2266.0864               | b <sub>21</sub>                                               |           |                                                 |
| 648.3528 <sup>+2</sup> | b <sub>11</sub> <sup>+2</sup>                                 | 1082.5758               | b <sub>9</sub>                                                | 1496.7290 <sup>+2</sup> | y <sub>30</sub> -H <sub>3</sub> PO <sub>4</sub> <sup>+2</sup> | 2281.1935               | b <sub>22</sub> -H <sub>3</sub> PO <sub>4</sub>               |           |                                                 |

MS/MS Fragmentation of KASGSGGsAALGPSFGPSGGSGTKLPK  
 Found in IPI00014414, Bromodomain-containing protein 2

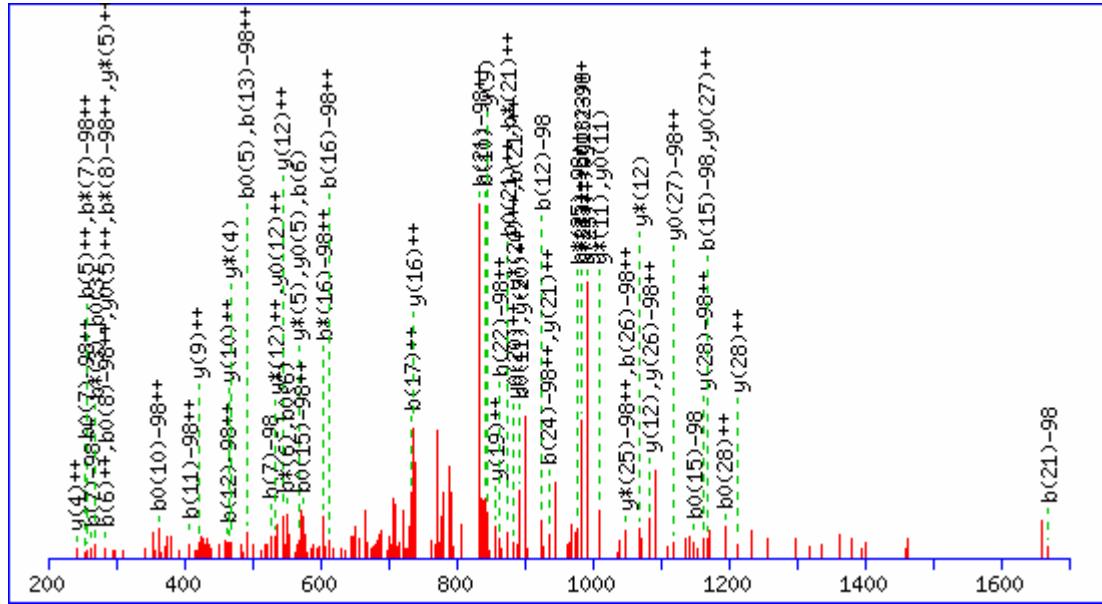

|                        |                                                               |                        |                                                               |                         |                                                               |                         |                                                               |           |                                                 |
|------------------------|---------------------------------------------------------------|------------------------|---------------------------------------------------------------|-------------------------|---------------------------------------------------------------|-------------------------|---------------------------------------------------------------|-----------|-------------------------------------------------|
| 74.0600 <sup>+2</sup>  | y <sub>1</sub> <sup>+2</sup>                                  | 512.7266 <sup>+2</sup> | b <sub>12</sub> <sup>+2</sup>                                 | 840.3247                | b <sub>10</sub>                                               | 1099.4973 <sup>+2</sup> | b <sub>26</sub> <sup>+2</sup>                                 | 1726.8143 | b <sub>22</sub> -H <sub>3</sub> PO <sub>4</sub> |
| 100.5733 <sup>+2</sup> | b <sub>2</sub> <sup>+2</sup>                                  | 514.7904 <sup>+2</sup> | y <sub>11</sub> <sup>+2</sup>                                 | 844.4887                | y <sub>9</sub>                                                | 1106.0257 <sup>+2</sup> | y <sub>25</sub> <sup>+2</sup>                                 | 1767.7698 | b <sub>21</sub>                                 |
| 122.5864 <sup>+2</sup> | y <sub>2</sub> <sup>+2</sup>                                  | 540.7753 <sup>+2</sup> | b <sub>14</sub> -H <sub>3</sub> PO <sub>4</sub> <sup>+2</sup> | 855.8778 <sup>+2</sup>  | b <sub>20</sub> <sup>+2</sup>                                 | 1107.0509 <sup>+2</sup> | b <sub>27</sub> -H <sub>3</sub> PO <sub>4</sub> <sup>+2</sup> | 1785.9494 | y <sub>20</sub>                                 |
| 144.0893 <sup>+2</sup> | b <sub>3</sub> <sup>+2</sup>                                  | 541.2373 <sup>+2</sup> | b <sub>13</sub> <sup>+2</sup>                                 | 857.9598 <sup>+2</sup>  | y <sub>19</sub> <sup>+2</sup>                                 | 1129.0640 <sup>+2</sup> | y <sub>27</sub> -H <sub>3</sub> PO <sub>4</sub> <sup>+2</sup> | 1813.8464 | b <sub>23</sub> -H <sub>3</sub> PO <sub>4</sub> |
| 147.1128               | y <sub>1</sub>                                                | 543.3011 <sup>+2</sup> | y <sub>12</sub> <sup>+2</sup>                                 | 863.9108 <sup>+2</sup>  | b <sub>22</sub> -H <sub>3</sub> PO <sub>4</sub> <sup>+2</sup> | 1134.5364 <sup>+2</sup> | y <sub>26</sub> <sup>+2</sup>                                 | 1824.7912 | b <sub>22</sub>                                 |
| 172.6001 <sup>+2</sup> | b <sub>4</sub> <sup>+2</sup>                                  | 545.2678               | b <sub>7</sub>                                                | 884.3885 <sup>+2</sup>  | b <sub>21</sub> <sup>+2</sup>                                 | 1155.5773 <sup>+2</sup> | b <sub>28</sub> -H <sub>3</sub> PO <sub>4</sub> <sup>+2</sup> | 1854.9708 | y <sub>21</sub> -H <sub>3</sub> PO <sub>4</sub> |
| 179.1285 <sup>+2</sup> | y <sub>3</sub> <sup>+2</sup>                                  | 584.2913 <sup>+2</sup> | b <sub>15</sub> -H <sub>3</sub> PO <sub>4</sub> <sup>+2</sup> | 893.4783 <sup>+2</sup>  | y <sub>20</sub> <sup>+2</sup>                                 | 1156.0394 <sup>+2</sup> | b <sub>27</sub> <sup>+2</sup>                                 | 1870.8678 | b <sub>24</sub> -H <sub>3</sub> PO <sub>4</sub> |
| 200.1394               | b <sub>2</sub>                                                | 586.3923               | y <sub>5</sub>                                                | 907.4268 <sup>+2</sup>  | b <sub>23</sub> -H <sub>3</sub> PO <sub>4</sub> <sup>+2</sup> | 1164.5826 <sup>+2</sup> | y <sub>28</sub> -H <sub>3</sub> PO <sub>4</sub> <sup>+2</sup> | 1911.8233 | b <sub>23</sub>                                 |
| 216.1161 <sup>+2</sup> | b <sub>5</sub> <sup>+2</sup>                                  | 589.7637 <sup>+2</sup> | b <sub>14</sub> <sup>+2</sup>                                 | 911.3619                | b <sub>11</sub>                                               | 1167.5753               | b <sub>15</sub> -H <sub>3</sub> PO <sub>4</sub>               | 1911.9923 | y <sub>22</sub> -H <sub>3</sub> PO <sub>4</sub> |
| 243.1759 <sup>+2</sup> | y <sub>4</sub> <sup>+2</sup>                                  | 602.2893               | b <sub>8</sub>                                                | 912.8993 <sup>+2</sup>  | b <sub>22</sub> <sup>+2</sup>                                 | 1178.0525 <sup>+2</sup> | y <sub>27</sub> <sup>+2</sup>                                 | 1952.9477 | y <sub>21</sub>                                 |
| 244.1656               | y <sub>2</sub>                                                | 612.8020 <sup>+2</sup> | b <sub>16</sub> -H <sub>3</sub> PO <sub>4</sub> <sup>+2</sup> | 926.469                 | b <sub>12</sub> -H <sub>3</sub> PO <sub>4</sub>               | 1178.5201               | b <sub>14</sub>                                               | 1968.8447 | b <sub>24</sub>                                 |
| 244.6268 <sup>+2</sup> | b <sub>6</sub> <sup>+2</sup>                                  | 616.8353 <sup>+2</sup> | y <sub>13</sub> <sup>+2</sup>                                 | 927.9891 <sup>+2</sup>  | y <sub>21</sub> -H <sub>3</sub> PO <sub>4</sub> <sup>+2</sup> | 1204.5657 <sup>+2</sup> | b <sub>28</sub> <sup>+2</sup>                                 | 1969.0138 | y <sub>23</sub> -H <sub>3</sub> PO <sub>4</sub> |
| 273.1375 <sup>+2</sup> | b <sub>7</sub> <sup>+2</sup>                                  | 633.2797 <sup>+2</sup> | b <sub>15</sub> <sup>+2</sup>                                 | 931.5207                | y <sub>10</sub>                                               | 1213.5710 <sup>+2</sup> | y <sub>28</sub> <sup>+2</sup>                                 | 1971.9155 | b <sub>25</sub> -H <sub>3</sub> PO <sub>4</sub> |
| 287.1714               | b <sub>3</sub>                                                | 643.4137               | y <sub>6</sub>                                                | 935.9376 <sup>+2</sup>  | b <sub>24</sub> -H <sub>3</sub> PO <sub>4</sub> <sup>+2</sup> | 1224.5967               | b <sub>16</sub> -H <sub>3</sub> PO <sub>4</sub>               | 2009.9692 | y <sub>22</sub>                                 |
| 293.6998 <sup>+2</sup> | y <sub>5</sub> <sup>+2</sup>                                  | 645.3461 <sup>+2</sup> | y <sub>14</sub> <sup>+2</sup>                                 | 956.4153 <sup>+2</sup>  | b <sub>23</sub> <sup>+2</sup>                                 | 1228.6301 <sup>+2</sup> | MH-H <sub>3</sub> PO <sub>4</sub> <sup>+2</sup>               | 2026.0352 | y <sub>24</sub> -H <sub>3</sub> PO <sub>4</sub> |
| 301.6483 <sup>+2</sup> | b <sub>5</sub> <sup>+2</sup>                                  | 661.7905 <sup>+2</sup> | b <sub>16</sub> <sup>+2</sup>                                 | 956.4998 <sup>+2</sup>  | y <sub>22</sub> -H <sub>3</sub> PO <sub>4</sub> <sup>+2</sup> | 1232.6634               | y <sub>13</sub>                                               | 2066.9907 | y <sub>23</sub>                                 |
| 322.2105 <sup>+2</sup> | y <sub>6</sub> <sup>+2</sup>                                  | 671.3107               | b <sub>9</sub> -H <sub>3</sub> PO <sub>4</sub>                | 976.9775 <sup>+2</sup>  | y <sub>21</sub> <sup>+2</sup>                                 | 1265.5522               | b <sub>15</sub>                                               | 2069.8924 | b <sub>25</sub>                                 |
| 336.1590 <sup>+2</sup> | b <sub>9</sub> -H <sub>3</sub> PO <sub>4</sub> <sup>+2</sup>  | 686.3362 <sup>+2</sup> | b <sub>17</sub> -H <sub>3</sub> PO <sub>4</sub> <sup>+2</sup> | 983.4905                | b <sub>13</sub> -H <sub>3</sub> PO <sub>4</sub>               | 1277.6185 <sup>+2</sup> | MH <sup>+2</sup>                                              | 2100.0105 | b <sub>26</sub> -H <sub>3</sub> PO <sub>4</sub> |
| 344.1928               | b <sub>4</sub>                                                | 688.8621 <sup>+2</sup> | y <sub>15</sub> <sup>+2</sup>                                 | 984.9260 <sup>+2</sup>  | b <sub>24</sub> <sup>+2</sup>                                 | 1289.6848               | y <sub>14</sub>                                               | 2113.0673 | y <sub>25</sub> -H <sub>3</sub> PO <sub>4</sub> |
| 357.2496               | y <sub>3</sub>                                                | 714.8469 <sup>+2</sup> | b <sub>18</sub> -H <sub>3</sub> PO <sub>4</sub> <sup>+2</sup> | 985.0105 <sup>+2</sup>  | y <sub>23</sub> -H <sub>3</sub> PO <sub>4</sub> <sup>+2</sup> | 1322.5736               | b <sub>16</sub>                                               | 2124.0121 | y <sub>24</sub>                                 |
| 365.7265 <sup>+2</sup> | y <sub>7</sub> <sup>+2</sup>                                  | 730.4458               | y <sub>7</sub>                                                | 986.4614 <sup>+2</sup>  | b <sub>25</sub> -H <sub>3</sub> PO <sub>4</sub> <sup>+2</sup> | 1371.6652               | b <sub>17</sub> -H <sub>3</sub> PO <sub>4</sub>               | 2170.0887 | y <sub>26</sub> -H <sub>3</sub> PO <sub>4</sub> |
| 371.6776 <sup>+2</sup> | b <sub>10</sub> -H <sub>3</sub> PO <sub>4</sub> <sup>+2</sup> | 735.3247 <sup>+2</sup> | b <sub>17</sub> <sup>+2</sup>                                 | 1005.4882 <sup>+2</sup> | y <sub>22</sub> <sup>+2</sup>                                 | 1376.7169               | y <sub>15</sub>                                               | 2197.9874 | b <sub>26</sub>                                 |
| 385.1475 <sup>+2</sup> | b <sub>9</sub> <sup>+2</sup>                                  | 737.3884 <sup>+2</sup> | y <sub>16</sub> <sup>+2</sup>                                 | 1013.5213 <sup>+2</sup> | y <sub>24</sub> -H <sub>3</sub> PO <sub>4</sub> <sup>+2</sup> | 1428.6866               | b <sub>18</sub> -H <sub>3</sub> PO <sub>4</sub>               | 2211.0442 | y <sub>25</sub>                                 |
| 394.2373 <sup>+2</sup> | y <sub>8</sub> <sup>+2</sup>                                  | 742.3478               | b <sub>10</sub> -H <sub>3</sub> PO <sub>4</sub>               | 1024.4459               | b <sub>12</sub>                                               | 1469.642                | b <sub>17</sub>                                               | 2213.0945 | b <sub>27</sub> -H <sub>3</sub> PO <sub>4</sub> |
| 407.1961 <sup>+2</sup> | b <sub>11</sub> -H <sub>3</sub> PO <sub>4</sub> <sup>+2</sup> | 763.3733 <sup>+2</sup> | b <sub>19</sub> -H <sub>3</sub> PO <sub>4</sub> <sup>+2</sup> | 1028.5735               | y <sub>11</sub>                                               | 1473.7696               | y <sub>16</sub>                                               | 2257.1207 | y <sub>27</sub> -H <sub>3</sub> PO <sub>4</sub> |
| 420.6660 <sup>+2</sup> | b <sub>10</sub> <sup>+2</sup>                                 | 763.8354 <sup>+2</sup> | b <sub>18</sub> <sup>+2</sup>                                 | 1033.9990 <sup>+2</sup> | y <sub>23</sub> <sup>+2</sup>                                 | 1525.7394               | b <sub>19</sub> -H <sub>3</sub> PO <sub>4</sub>               | 2268.0656 | y <sub>26</sub>                                 |
| 422.7480 <sup>+2</sup> | y <sub>9</sub> <sup>+2</sup>                                  | 765.8992 <sup>+2</sup> | y <sub>17</sub> <sup>+2</sup>                                 | 1035.4498 <sup>+2</sup> | b <sub>25</sub> <sup>+2</sup>                                 | 1526.6635               | b <sub>18</sub>                                               | 2310.1473 | b <sub>28</sub> -H <sub>3</sub> PO <sub>4</sub> |
| 431.2249               | b <sub>5</sub>                                                | 769.2876               | b <sub>9</sub>                                                | 1050.5089 <sup>+2</sup> | b <sub>26</sub> -H <sub>3</sub> PO <sub>4</sub> <sup>+2</sup> | 1530.7911               | y <sub>17</sub>                                               | 2311.0714 | b <sub>27</sub>                                 |
| 456.1846 <sup>+2</sup> | b <sub>11</sub> <sup>+2</sup>                                 | 787.4672               | y <sub>8</sub>                                                | 1057.0373 <sup>+2</sup> | y <sub>25</sub> -H <sub>3</sub> PO <sub>4</sub> <sup>+2</sup> | 1612.7714               | b <sub>20</sub> -H <sub>3</sub> PO <sub>4</sub>               | 2328.1579 | y <sub>28</sub> -H <sub>3</sub> PO <sub>4</sub> |
| 463.7381 <sup>+2</sup> | b <sub>12</sub> -H <sub>3</sub> PO <sub>4</sub> <sup>+2</sup> | 806.8893 <sup>+2</sup> | b <sub>20</sub> -H <sub>3</sub> PO <sub>4</sub> <sup>+2</sup> | 1062.5097 <sup>+2</sup> | y <sub>24</sub> <sup>+2</sup>                                 | 1623.7163               | b <sub>19</sub>                                               | 2355.0976 | y <sub>27</sub>                                 |
| 466.2640 <sup>+2</sup> | y <sub>10</sub> <sup>+2</sup>                                 | 812.3618 <sup>+2</sup> | b <sub>19</sub> <sup>+2</sup>                                 | 1080.5432               | b <sub>14</sub> -H <sub>3</sub> PO <sub>4</sub>               | 1643.8751               | y <sub>18</sub>                                               | 2408.1242 | b <sub>28</sub>                                 |
| 485.3446               | y <sub>4</sub>                                                | 813.385                | b <sub>11</sub> -H <sub>3</sub> PO <sub>4</sub>               | 1081.4674               | b <sub>13</sub>                                               | 1669.7929               | b <sub>21</sub> -H <sub>3</sub> PO <sub>4</sub>               | 2426.1348 | y <sub>28</sub>                                 |
| 488.2463               | b <sub>6</sub>                                                | 822.4412 <sup>+2</sup> | y <sub>18</sub> <sup>+2</sup>                                 | 1085.5480 <sup>+2</sup> | y <sub>26</sub> -H <sub>3</sub> PO <sub>4</sub> <sup>+2</sup> | 1710.7483               | b <sub>20</sub>                                               | 2456.2528 | MH-H <sub>3</sub> PO <sub>4</sub>               |
| 492.2489 <sup>+2</sup> | b <sub>13</sub> -H <sub>3</sub> PO <sub>4</sub> <sup>+2</sup> | 835.4001 <sup>+2</sup> | b <sub>21</sub> -H <sub>3</sub> PO <sub>4</sub> <sup>+2</sup> | 1085.5949               | y <sub>12</sub>                                               | 1714.9123               | y <sub>19</sub>                                               | 2554.2297 | MH                                              |

MS/MS Fragmentation of KT<sub>5</sub>LDVNSAEPGFLAPGAR  
 Found in IPI00171636, Neuron navigator 1

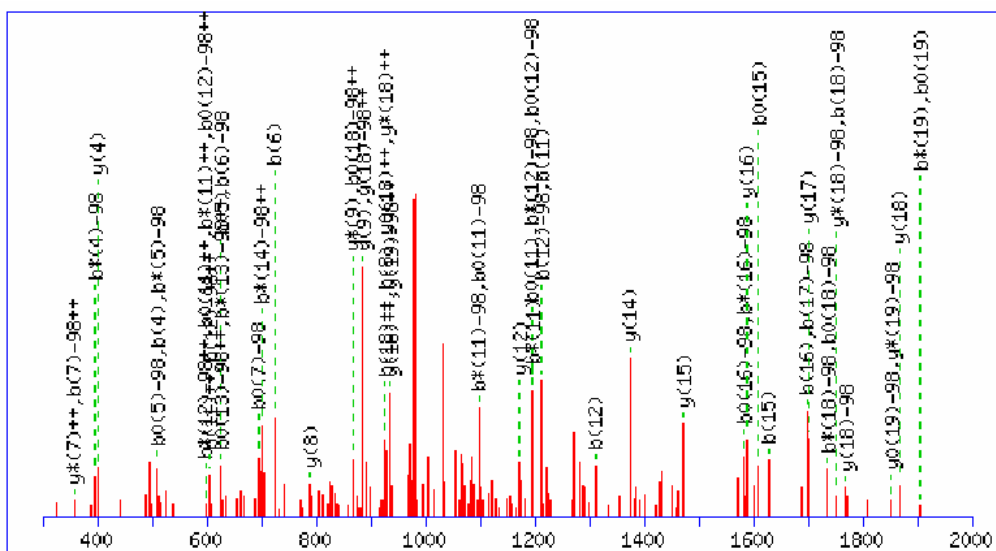

|                        |                                                              |                        |                                                               |                        |                                                               |                         |                                                               |           |                                                 |
|------------------------|--------------------------------------------------------------|------------------------|---------------------------------------------------------------|------------------------|---------------------------------------------------------------|-------------------------|---------------------------------------------------------------|-----------|-------------------------------------------------|
| 88.0631 <sup>+2</sup>  | y <sub>1</sub> <sup>+2</sup>                                 | 400.2303               | y <sub>4</sub>                                                | 655.2872 <sup>+2</sup> | b <sub>12</sub> <sup>+2</sup>                                 | 914.4578                | b <sub>9</sub> -H <sub>3</sub> PO <sub>4</sub>                | 1472.7492 | y <sub>15</sub>                                 |
| 115.5786 <sup>+2</sup> | b <sub>2</sub> <sup>+2</sup>                                 | 406.1835 <sup>+2</sup> | b <sub>7</sub> <sup>+2</sup>                                  | 683.7979 <sup>+2</sup> | b <sub>13</sub> <sup>+2</sup>                                 | 925.4027                | b <sub>8</sub>                                                | 1513.657  | b <sub>14</sub>                                 |
| 123.5817 <sup>+2</sup> | y <sub>2</sub> <sup>+2</sup>                                 | 412.2554               | b <sub>4</sub> -H <sub>3</sub> PO <sub>4</sub>                | 687.3440 <sup>+2</sup> | y <sub>14</sub> <sup>+2</sup>                                 | 926.4299 <sup>+2</sup>  | b <sub>18</sub> <sup>+2</sup>                                 | 1528.7642 | b <sub>15</sub> -H <sub>3</sub> PO <sub>4</sub> |
| 150.0893 <sup>+2</sup> | b <sub>3</sub> -H <sub>3</sub> PO <sub>4</sub> <sup>+2</sup> | 414.2165 <sup>+2</sup> | b <sub>8</sub> -H <sub>3</sub> PO <sub>4</sub> <sup>+2</sup>  | 708.3437 <sup>+2</sup> | b <sub>14</sub> -H <sub>3</sub> PO <sub>4</sub> <sup>+2</sup> | 934.4329 <sup>+2</sup>  | y <sub>18</sub> <sup>+2</sup>                                 | 1587.7762 | y <sub>16</sub>                                 |
| 152.0924 <sup>+2</sup> | y <sub>3</sub> <sup>+2</sup>                                 | 443.2507 <sup>+2</sup> | y <sub>9</sub> <sup>+2</sup>                                  | 713.3828               | b <sub>7</sub> -H <sub>3</sub> PO <sub>4</sub>                | 935.9683 <sup>+2</sup>  | y <sub>19</sub> -H <sub>3</sub> PO <sub>4</sub> <sup>+2</sup> | 1599.8013 | b <sub>16</sub> -H <sub>3</sub> PO <sub>4</sub> |
| 175.119                | y <sub>1</sub>                                               | 457.7325 <sup>+2</sup> | b <sub>9</sub> -H <sub>3</sub> PO <sub>4</sub> <sup>+2</sup>  | 724.3277               | b <sub>6</sub>                                                | 961.9484 <sup>+2</sup>  | b <sub>19</sub> <sup>+2</sup>                                 | 1626.7411 | b <sub>15</sub>                                 |
| 199.0778 <sup>+2</sup> | b <sub>3</sub> <sup>+2</sup>                                 | 463.2050 <sup>+2</sup> | b <sub>8</sub> <sup>+2</sup>                                  | 731.4199               | y <sub>7</sub>                                                | 984.9568 <sup>+2</sup>  | y <sub>19</sub> <sup>+2</sup>                                 | 1696.8541 | b <sub>17</sub> -H <sub>3</sub> PO <sub>4</sub> |
| 200.6188 <sup>+2</sup> | y <sub>4</sub> <sup>+2</sup>                                 | 471.2674               | y <sub>5</sub>                                                | 736.8782 <sup>+2</sup> | y <sub>15</sub> <sup>+2</sup>                                 | 985.4949                | b <sub>10</sub> -H <sub>3</sub> PO <sub>4</sub>               | 1697.7782 | b <sub>16</sub>                                 |
| 206.6314 <sup>+2</sup> | b <sub>4</sub> -H <sub>3</sub> PO <sub>4</sub> <sup>+2</sup> | 493.2511 <sup>+2</sup> | b <sub>10</sub> -H <sub>3</sub> PO <sub>4</sub> <sup>+2</sup> | 757.3322 <sup>+2</sup> | b <sub>14</sub> <sup>+2</sup>                                 | 1000.0158 <sup>+2</sup> | MH-H <sub>3</sub> PO <sub>4</sub> <sup>+2</sup>               | 1700.8602 | y <sub>17</sub>                                 |
| 230.1499               | b <sub>2</sub>                                               | 506.7210 <sup>+2</sup> | b <sub>9</sub> <sup>+2</sup>                                  | 764.8857 <sup>+2</sup> | b <sub>15</sub> -H <sub>3</sub> PO <sub>4</sub> <sup>+2</sup> | 1012.4347               | b <sub>9</sub>                                                | 1753.8755 | b <sub>18</sub> -H <sub>3</sub> PO <sub>4</sub> |
| 236.1373 <sup>+2</sup> | y <sub>5</sub> <sup>+2</sup>                                 | 507.7720 <sup>+2</sup> | y <sub>10</sub> <sup>+2</sup>                                 | 788.4413               | y <sub>8</sub>                                                | 1014.5367               | y <sub>10</sub>                                               | 1769.8817 | y <sub>18</sub> -H <sub>3</sub> PO <sub>4</sub> |
| 246.1561               | y <sub>2</sub>                                               | 510.2323               | b <sub>4</sub>                                                | 794.3917 <sup>+2</sup> | y <sub>16</sub> <sup>+2</sup>                                 | 1049.0043 <sup>+2</sup> | MH <sup>+2</sup>                                              | 1794.831  | b <sub>17</sub>                                 |
| 255.6198 <sup>+2</sup> | b <sub>4</sub> <sup>+2</sup>                                 | 527.2824               | b <sub>5</sub> -H <sub>3</sub> PO <sub>4</sub>                | 800.4043 <sup>+2</sup> | b <sub>16</sub> -H <sub>3</sub> PO <sub>4</sub> <sup>+2</sup> | 1083.4718               | b <sub>10</sub>                                               | 1824.9127 | b <sub>19</sub> -H <sub>3</sub> PO <sub>4</sub> |
| 264.1448 <sup>+2</sup> | b <sub>5</sub> -H <sub>3</sub> PO <sub>4</sub> <sup>+2</sup> | 542.2395 <sup>+2</sup> | b <sub>10</sub> <sup>+2</sup>                                 | 811.3597               | b <sub>7</sub>                                                | 1085.5738               | y <sub>11</sub>                                               | 1851.8524 | b <sub>18</sub>                                 |
| 292.6794 <sup>+2</sup> | y <sub>6</sub> <sup>+2</sup>                                 | 543.2905 <sup>+2</sup> | y <sub>11</sub> <sup>+2</sup>                                 | 813.8742 <sup>+2</sup> | b <sub>15</sub> <sup>+2</sup>                                 | 1114.5375               | b <sub>11</sub> -H <sub>3</sub> PO <sub>4</sub>               | 1867.8586 | y <sub>18</sub>                                 |
| 299.1714               | b <sub>3</sub> -H <sub>3</sub> PO <sub>4</sub>               | 557.7724 <sup>+2</sup> | b <sub>11</sub> -H <sub>3</sub> PO <sub>4</sub> <sup>+2</sup> | 827.4258               | b <sub>8</sub> -H <sub>3</sub> PO <sub>4</sub>                | 1172.6058               | y <sub>12</sub>                                               | 1870.9294 | y <sub>19</sub> -H <sub>3</sub> PO <sub>4</sub> |
| 303.1775               | y <sub>3</sub>                                               | 584.3515               | y <sub>6</sub>                                                | 848.9307 <sup>+2</sup> | b <sub>17</sub> -H <sub>3</sub> PO <sub>4</sub> <sup>+2</sup> | 1211.5903               | b <sub>12</sub> -H <sub>3</sub> PO <sub>4</sub>               | 1922.8895 | b <sub>19</sub>                                 |
| 313.1333 <sup>+2</sup> | b <sub>5</sub> <sup>+2</sup>                                 | 586.8066 <sup>+2</sup> | y <sub>12</sub> <sup>+2</sup>                                 | 849.3927 <sup>+2</sup> | b <sub>16</sub> <sup>+2</sup>                                 | 1212.5144               | b <sub>11</sub>                                               | 1968.9063 | y <sub>19</sub>                                 |
| 313.6790 <sup>+2</sup> | b <sub>6</sub> -H <sub>3</sub> PO <sub>4</sub> <sup>+2</sup> | 606.2988 <sup>+2</sup> | b <sub>12</sub> -H <sub>3</sub> PO <sub>4</sub> <sup>+2</sup> | 850.9338 <sup>+2</sup> | y <sub>17</sub> <sup>+2</sup>                                 | 1268.6117               | b <sub>13</sub> -H <sub>3</sub> PO <sub>4</sub>               | 1999.0243 | MH-H <sub>3</sub> PO <sub>4</sub>               |
| 357.1951 <sup>+2</sup> | b <sub>7</sub> -H <sub>3</sub> PO <sub>4</sub> <sup>+2</sup> | 606.7608 <sup>+2</sup> | b <sub>11</sub> <sup>+2</sup>                                 | 877.4414 <sup>+2</sup> | b <sub>18</sub> -H <sub>3</sub> PO <sub>4</sub> <sup>+2</sup> | 1286.6488               | y <sub>13</sub>                                               | 2097.0012 | MH                                              |
| 362.6675 <sup>+2</sup> | b <sub>6</sub> <sup>+2</sup>                                 | 625.2593               | b <sub>5</sub>                                                | 885.4445 <sup>+2</sup> | y <sub>18</sub> -H <sub>3</sub> PO <sub>4</sub> <sup>+2</sup> | 1309.5672               | b <sub>12</sub>                                               |           |                                                 |
| 366.2136 <sup>+2</sup> | y <sub>7</sub> <sup>+2</sup>                                 | 626.3508               | b <sub>6</sub> -H <sub>3</sub> PO <sub>4</sub>                | 885.4941               | y <sub>9</sub>                                                | 1366.5886               | b <sub>13</sub>                                               |           |                                                 |
| 394.7243 <sup>+2</sup> | y <sub>8</sub> <sup>+2</sup>                                 | 634.8095 <sup>+2</sup> | b <sub>13</sub> -H <sub>3</sub> PO <sub>4</sub> <sup>+2</sup> | 897.9191 <sup>+2</sup> | b <sub>17</sub> <sup>+2</sup>                                 | 1373.6808               | y <sub>14</sub>                                               |           |                                                 |
| 397.1483               | b <sub>3</sub>                                               | 643.8280 <sup>+2</sup> | y <sub>13</sub> <sup>+2</sup>                                 | 912.9600 <sup>+2</sup> | b <sub>19</sub> -H <sub>3</sub> PO <sub>4</sub> <sup>+2</sup> | 1415.6801               | b <sub>14</sub> -H <sub>3</sub> PO <sub>4</sub>               |           |                                                 |

MS/MS Fragmentation of ASQsAGDINTIYQPPEPR  
 Found in IPI00181703, mitogen-activated protein kinase kinase kinase 3 isoform 1

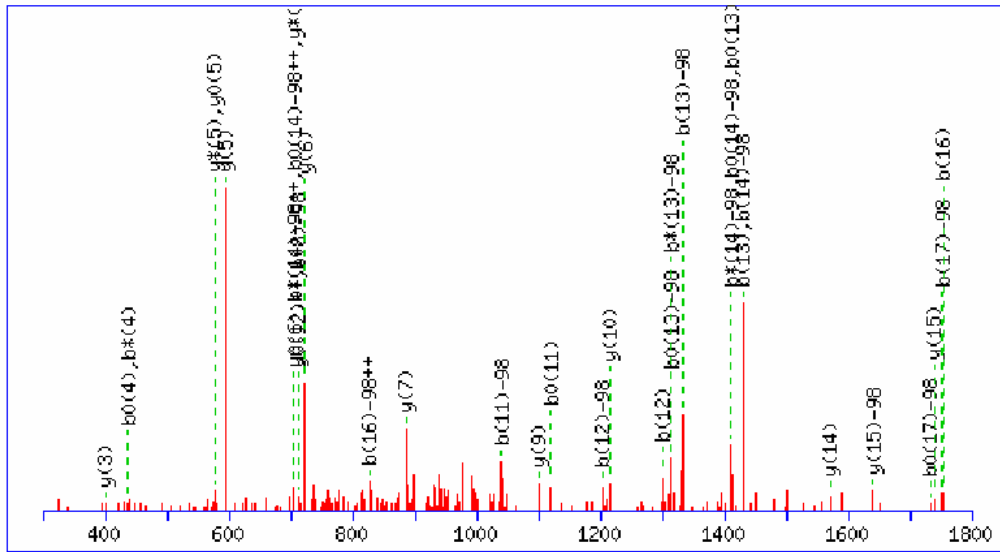

|                        |                                                |                        |                                                |                         |                                                               |           |                                                 |           |                                                 |
|------------------------|------------------------------------------------|------------------------|------------------------------------------------|-------------------------|---------------------------------------------------------------|-----------|-------------------------------------------------|-----------|-------------------------------------------------|
| 88.0631 <sup>+2</sup>  | y <sub>1</sub> <sup>+2</sup>                   | 484.215                | b <sub>6</sub> -H <sub>3</sub> PO <sub>4</sub> | 785.8966 <sup>+2</sup>  | y <sub>14</sub> <sup>+2</sup>                                 | 1025.3935 | b <sub>10</sub>                                 | 1570.786  | y <sub>14</sub>                                 |
| 136.5895 <sup>+2</sup> | y <sub>2</sub> <sup>+2</sup>                   | 498.2671               | y <sub>4</sub>                                 | 810.3029                | b <sub>8</sub>                                                | 1040.5007 | b <sub>11</sub> -H <sub>3</sub> PO <sub>4</sub> | 1623.705  | b <sub>15</sub>                                 |
| 159.0764               | b <sub>2</sub>                                 | 500.2665 <sup>+2</sup> | y <sub>8</sub> <sup>+2</sup>                   | 820.4074 <sup>+2</sup>  | y <sub>15</sub> -H <sub>3</sub> PO <sub>4</sub> <sup>+2</sup> | 1100.5735 | y <sub>9</sub>                                  | 1639.8075 | y <sub>15</sub> -H <sub>3</sub> PO <sub>4</sub> |
| 175.119                | y <sub>1</sub>                                 | 525.1705               | b <sub>5</sub>                                 | 826.369                 | b <sub>9</sub> -H <sub>3</sub> PO <sub>4</sub>                | 1138.4776 | b <sub>11</sub>                                 | 1654.7707 | b <sub>16</sub> -H <sub>3</sub> PO <sub>4</sub> |
| 201.1108 <sup>+2</sup> | y <sub>3</sub> <sup>+2</sup>                   | 550.7904 <sup>+2</sup> | y <sub>9</sub> <sup>+2</sup>                   | 869.3958 <sup>+2</sup>  | y <sub>15</sub> <sup>+2</sup>                                 | 1203.564  | b <sub>12</sub> -H <sub>3</sub> PO <sub>4</sub> | 1737.7844 | y <sub>15</sub>                                 |
| 249.6372 <sup>+2</sup> | y <sub>4</sub> <sup>+2</sup>                   | 582.1919               | b <sub>6</sub>                                 | 884.4367 <sup>+2</sup>  | y <sub>16</sub> -H <sub>3</sub> PO <sub>4</sub> <sup>+2</sup> | 1214.6164 | y <sub>10</sub>                                 | 1751.8235 | b <sub>17</sub> -H <sub>3</sub> PO <sub>4</sub> |
| 272.1717               | y <sub>2</sub>                                 | 595.3198               | y <sub>5</sub>                                 | 886.4417                | y <sub>7</sub>                                                | 1301.5409 | b <sub>12</sub>                                 | 1752.7476 | b <sub>16</sub>                                 |
| 287.135                | b <sub>3</sub>                                 | 599.242                | b <sub>7</sub> -H <sub>3</sub> PO <sub>4</sub> | 924.3459                | b <sub>9</sub>                                                | 1327.7005 | y <sub>11</sub>                                 | 1767.866  | y <sub>16</sub> -H <sub>3</sub> PO <sub>4</sub> |
| 298.1636 <sup>+2</sup> | y <sub>5</sub> <sup>+2</sup>                   | 607.8118 <sup>+2</sup> | y <sub>10</sub> <sup>+2</sup>                  | 927.4167                | b <sub>10</sub> -H <sub>3</sub> PO <sub>4</sub>               | 1331.6226 | b <sub>13</sub> -H <sub>3</sub> PO <sub>4</sub> | 1849.8004 | b <sub>17</sub>                                 |
| 356.1565               | b <sub>4</sub> -H <sub>3</sub> PO <sub>4</sub> | 664.3539 <sup>+2</sup> | y <sub>11</sub> <sup>+2</sup>                  | 927.9527 <sup>+2</sup>  | y <sub>17</sub> -H <sub>3</sub> PO <sub>4</sub> <sup>+2</sup> | 1428.6754 | b <sub>14</sub> -H <sub>3</sub> PO <sub>4</sub> | 1854.8981 | y <sub>17</sub> -H <sub>3</sub> PO <sub>4</sub> |
| 362.1928 <sup>+2</sup> | y <sub>6</sub> <sup>+2</sup>                   | 697.2189               | b <sub>7</sub>                                 | 933.4251 <sup>+2</sup>  | y <sub>16</sub> <sup>+2</sup>                                 | 1429.5995 | b <sub>13</sub>                                 | 1865.8429 | y <sub>16</sub>                                 |
| 401.2143               | y <sub>3</sub>                                 | 712.326                | b <sub>8</sub> -H <sub>3</sub> PO <sub>4</sub> | 963.4712 <sup>+2</sup>  | MH-H <sub>3</sub> PO <sub>4</sub> <sup>+2</sup>               | 1442.7274 | y <sub>12</sub>                                 | 1925.9352 | MH-H <sub>3</sub> PO <sub>4</sub>               |
| 427.1936               | b <sub>5</sub> -H <sub>3</sub> PO <sub>4</sub> | 721.8673 <sup>+2</sup> | y <sub>12</sub> <sup>+2</sup>                  | 976.9411 <sup>+2</sup>  | y <sub>17</sub> <sup>+2</sup>                                 | 1499.7489 | y <sub>13</sub>                                 | 1952.875  | y <sub>17</sub>                                 |
| 443.7245 <sup>+2</sup> | y <sub>7</sub> <sup>+2</sup>                   | 723.3784               | y <sub>6</sub>                                 | 999.5258                | y <sub>8</sub>                                                | 1525.7281 | b <sub>15</sub> -H <sub>3</sub> PO <sub>4</sub> | 2023.9121 | MH                                              |
| 454.1334               | b <sub>4</sub>                                 | 750.3781 <sup>+2</sup> | y <sub>13</sub> <sup>+2</sup>                  | 1012.4597 <sup>+2</sup> | MH <sup>+2</sup>                                              | 1526.6523 | b <sub>14</sub>                                 |           |                                                 |

MS/MS Fragmentation of RVsGDAAQDLDR  
 Found in IPI00464978, Insulin receptor substrate 2 insertion mutant (Fragment)

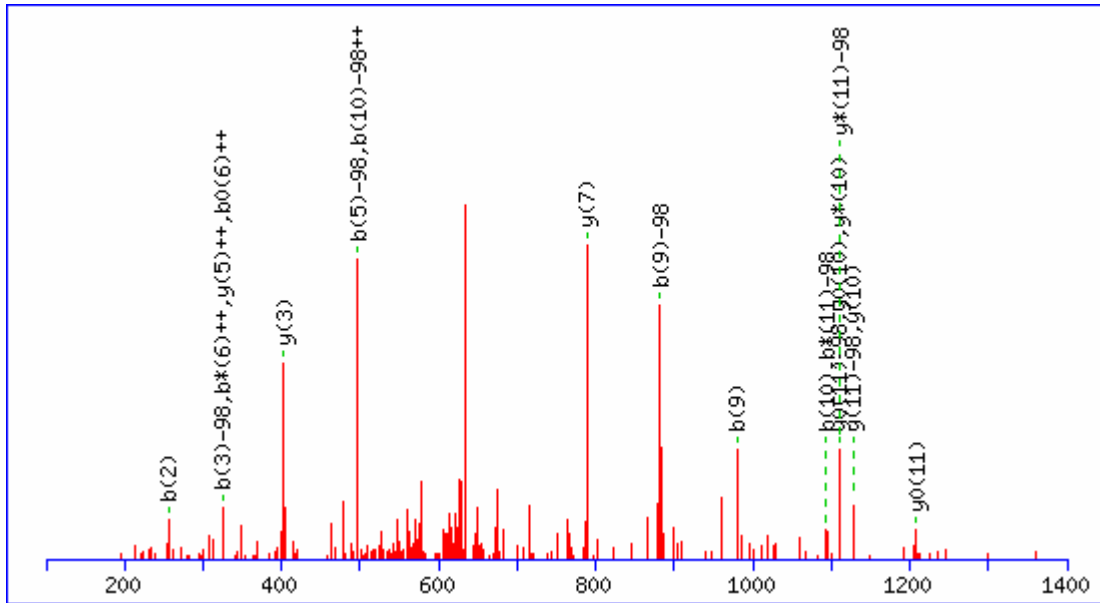

|                        |                                                              |                        |                                                              |                        |                                                               |                        |                                                 |           |                                                 |
|------------------------|--------------------------------------------------------------|------------------------|--------------------------------------------------------------|------------------------|---------------------------------------------------------------|------------------------|-------------------------------------------------|-----------|-------------------------------------------------|
| 88.0631 <sup>+2</sup>  | y <sub>1</sub> <sup>+2</sup>                                 | 298.1154 <sup>+2</sup> | b <sub>5</sub> <sup>+2</sup>                                 | 452.2120 <sup>+2</sup> | y <sub>8</sub> <sup>+2</sup>                                  | 604.7508 <sup>+2</sup> | b <sub>11</sub> <sup>+2</sup>                   | 960.4381  | y <sub>9</sub>                                  |
| 128.5920 <sup>+2</sup> | b <sub>2</sub> <sup>+2</sup>                                 | 320.1641 <sup>+2</sup> | b <sub>7</sub> -H <sub>3</sub> PO <sub>4</sub> <sup>+2</sup> | 480.1966               | b <sub>4</sub>                                                | 613.7561 <sup>+2</sup> | y <sub>11</sub> <sup>+2</sup>                   | 980.3833  | b <sub>9</sub>                                  |
| 145.5766 <sup>+2</sup> | y <sub>2</sub> <sup>+2</sup>                                 | 323.6614 <sup>+2</sup> | y <sub>5</sub> <sup>+2</sup>                                 | 480.7227 <sup>+2</sup> | y <sub>9</sub> <sup>+2</sup>                                  | 639.3209               | b <sub>7</sub> -H <sub>3</sub> PO <sub>4</sub>  | 995.4905  | b <sub>10</sub> -H <sub>3</sub> PO <sub>4</sub> |
| 163.1028 <sup>+2</sup> | b <sub>3</sub> -H <sub>3</sub> PO <sub>4</sub> <sup>+2</sup> | 325.1983               | b <sub>3</sub> -H <sub>3</sub> PO <sub>4</sub>               | 490.6953 <sup>+2</sup> | b <sub>9</sub> <sup>+2</sup>                                  | 642.8182 <sup>+2</sup> | MH-H <sub>3</sub> PO <sub>4</sub> <sup>+2</sup> | 1029.4596 | y <sub>10</sub> -H <sub>3</sub> PO <sub>4</sub> |
| 175.119                | y <sub>1</sub>                                               | 333.6340 <sup>+2</sup> | b <sub>6</sub> <sup>+2</sup>                                 | 497.2467               | b <sub>5</sub> -H <sub>3</sub> PO <sub>4</sub>                | 646.3155               | y <sub>5</sub>                                  | 1093.4674 | b <sub>10</sub>                                 |
| 191.6135 <sup>+2</sup> | b <sub>4</sub> -H <sub>3</sub> PO <sub>4</sub> <sup>+2</sup> | 359.1799 <sup>+2</sup> | y <sub>6</sub> <sup>+2</sup>                                 | 498.2489 <sup>+2</sup> | b <sub>10</sub> -H <sub>3</sub> PO <sub>4</sub> <sup>+2</sup> | 666.2607               | b <sub>6</sub>                                  | 1110.5174 | b <sub>11</sub> -H <sub>3</sub> PO <sub>4</sub> |
| 202.1186 <sup>+2</sup> | y <sub>3</sub> <sup>+2</sup>                                 | 369.1525 <sup>+2</sup> | b <sub>7</sub> <sup>+2</sup>                                 | 515.2334 <sup>+2</sup> | y <sub>10</sub> -H <sub>3</sub> PO <sub>4</sub> <sup>+2</sup> | 691.8066 <sup>+2</sup> | MH <sup>+2</sup>                                | 1127.4365 | y <sub>10</sub>                                 |
| 212.0912 <sup>+2</sup> | b <sub>3</sub> <sup>+2</sup>                                 | 382.2197               | b <sub>4</sub> -H <sub>3</sub> PO <sub>4</sub>               | 518.2569               | y <sub>4</sub>                                                | 717.3526               | y <sub>6</sub>                                  | 1128.528  | y <sub>11</sub> -H <sub>3</sub> PO <sub>4</sub> |
| 240.6020 <sup>+2</sup> | b <sub>4</sub> <sup>+2</sup>                                 | 384.1934 <sup>+2</sup> | b <sub>8</sub> -H <sub>3</sub> PO <sub>4</sub> <sup>+2</sup> | 547.2373 <sup>+2</sup> | b <sub>10</sub> <sup>+2</sup>                                 | 737.2978               | b <sub>7</sub>                                  | 1208.4943 | b <sub>11</sub>                                 |
| 249.1270 <sup>+2</sup> | b <sub>5</sub> -H <sub>3</sub> PO <sub>4</sub> <sup>+2</sup> | 394.6985 <sup>+2</sup> | y <sub>7</sub> <sup>+2</sup>                                 | 555.7624 <sup>+2</sup> | b <sub>11</sub> -H <sub>3</sub> PO <sub>4</sub> <sup>+2</sup> | 767.3795               | b <sub>8</sub> -H <sub>3</sub> PO <sub>4</sub>  | 1226.5049 | y <sub>11</sub>                                 |
| 256.1768               | b <sub>2</sub>                                               | 403.23                 | y <sub>3</sub>                                               | 564.2219 <sup>+2</sup> | y <sub>10</sub> <sup>+2</sup>                                 | 788.3897               | y <sub>7</sub>                                  | 1284.6291 | MH-H <sub>3</sub> PO <sub>4</sub>               |
| 259.6321 <sup>+2</sup> | y <sub>4</sub> <sup>+2</sup>                                 | 423.1752               | b <sub>3</sub>                                               | 564.7676 <sup>+2</sup> | y <sub>11</sub> -H <sub>3</sub> PO <sub>4</sub> <sup>+2</sup> | 865.3564               | b <sub>8</sub>                                  | 1382.606  | MH                                              |
| 284.6455 <sup>+2</sup> | b <sub>6</sub> -H <sub>3</sub> PO <sub>4</sub> <sup>+2</sup> | 433.1818 <sup>+2</sup> | b <sub>8</sub> <sup>+2</sup>                                 | 568.2838               | b <sub>6</sub> -H <sub>3</sub> PO <sub>4</sub>                | 882.4064               | b <sub>9</sub> -H <sub>3</sub> PO <sub>4</sub>  |           |                                                 |
| 290.1459               | y <sub>2</sub>                                               | 441.7068 <sup>+2</sup> | b <sub>9</sub> -H <sub>3</sub> PO <sub>4</sub> <sup>+2</sup> | 595.2236               | b <sub>5</sub>                                                | 903.4167               | y <sub>8</sub>                                  |           |                                                 |

MS/MS Fragmentation of KQsLGELIGTLNAAK  
 Found in IPI00465028, Triosephosphate isomerase

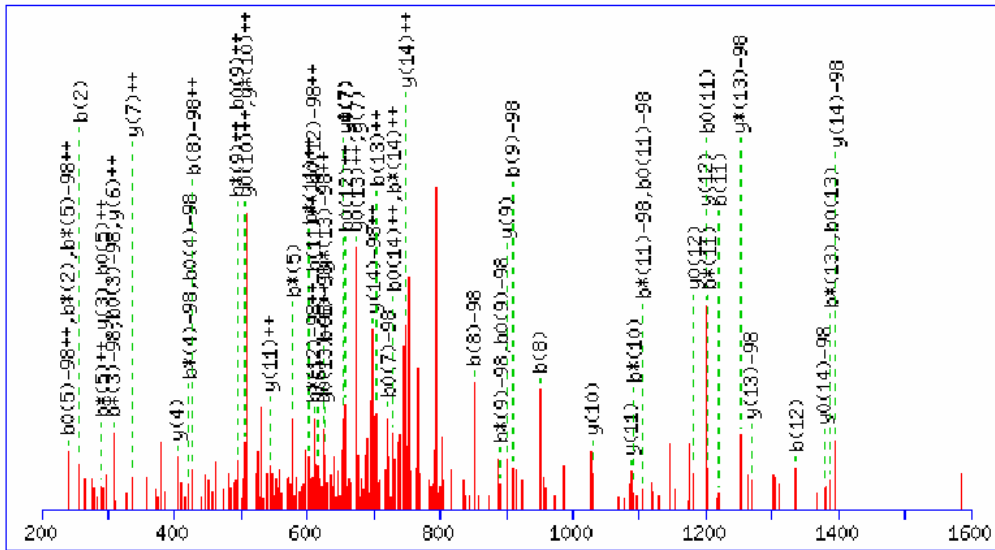

|                        |                                                              |                        |                                                               |                        |                                                               |                        |                                                 |           |                                                 |
|------------------------|--------------------------------------------------------------|------------------------|---------------------------------------------------------------|------------------------|---------------------------------------------------------------|------------------------|-------------------------------------------------|-----------|-------------------------------------------------|
| 74.0600 <sup>+2</sup>  | y <sub>1</sub> <sup>+2</sup>                                 | 326.1823               | b <sub>3</sub> -H <sub>3</sub> PO <sub>4</sub>                | 537.2432               | b <sub>4</sub>                                                | 723.3073               | b <sub>6</sub>                                  | 1199.6994 | y <sub>12</sub>                                 |
| 109.5786 <sup>+2</sup> | y <sub>2</sub> <sup>+2</sup>                                 | 337.6952 <sup>+2</sup> | y <sub>7</sub> <sup>+2</sup>                                  | 543.8113 <sup>+2</sup> | y <sub>11</sub> <sup>+2</sup>                                 | 738.4145               | b <sub>7</sub> -H <sub>3</sub> PO <sub>4</sub>  | 1220.6286 | b <sub>11</sub>                                 |
| 129.0840 <sup>+2</sup> | b <sub>2</sub> <sup>+2</sup>                                 | 362.1573 <sup>+2</sup> | b <sub>6</sub> <sup>+2</sup>                                  | 554.2759 <sup>+2</sup> | b <sub>10</sub> <sup>+2</sup>                                 | 738.8765 <sup>+2</sup> | b <sub>14</sub> <sup>+2</sup>                   | 1236.6947 | b <sub>12</sub> -H <sub>3</sub> PO <sub>4</sub> |
| 145.0972 <sup>+2</sup> | y <sub>3</sub> <sup>+2</sup>                                 | 369.7109 <sup>+2</sup> | b <sub>7</sub> -H <sub>3</sub> PO <sub>4</sub> <sup>+2</sup>  | 561.8295 <sup>+2</sup> | b <sub>11</sub> -H <sub>3</sub> PO <sub>4</sub> <sup>+2</sup> | 747.8818 <sup>+2</sup> | y <sub>14</sub> <sup>+2</sup>                   | 1268.7209 | y <sub>13</sub> -H <sub>3</sub> PO <sub>4</sub> |
| 147.1128               | y <sub>1</sub>                                               | 394.2373 <sup>+2</sup> | y <sub>8</sub> <sup>+2</sup>                                  | 594.2647               | b <sub>5</sub>                                                | 762.9408 <sup>+2</sup> | MH-H <sub>3</sub> PO <sub>4</sub> <sup>+2</sup> | 1307.7318 | b <sub>13</sub> -H <sub>3</sub> PO <sub>4</sub> |
| 163.5948 <sup>+2</sup> | b <sub>3</sub> -H <sub>3</sub> PO <sub>4</sub> <sup>+2</sup> | 403.23                 | y <sub>4</sub>                                                | 600.3533 <sup>+2</sup> | y <sub>12</sub> <sup>+2</sup>                                 | 787.4672               | y <sub>8</sub>                                  | 1334.6716 | b <sub>12</sub>                                 |
| 202.1186 <sup>+2</sup> | y <sub>4</sub> <sup>+2</sup>                                 | 418.6993 <sup>+2</sup> | b <sub>7</sub> <sup>+2</sup>                                  | 610.8180 <sup>+2</sup> | b <sub>11</sub> <sup>+2</sup>                                 | 811.9293 <sup>+2</sup> | MH <sup>+2</sup>                                | 1366.6978 | y <sub>13</sub>                                 |
| 212.5832 <sup>+2</sup> | b <sub>3</sub> <sup>+2</sup>                                 | 424.1592               | b <sub>3</sub>                                                | 617.3617               | y <sub>6</sub>                                                | 836.3914               | b <sub>7</sub>                                  | 1378.7689 | b <sub>14</sub> -H <sub>3</sub> PO <sub>4</sub> |
| 218.1499               | y <sub>2</sub>                                               | 426.2529 <sup>+2</sup> | b <sub>8</sub> -H <sub>3</sub> PO <sub>4</sub> <sup>+2</sup>  | 618.8510 <sup>+2</sup> | b <sub>12</sub> -H <sub>3</sub> PO <sub>4</sub> <sup>+2</sup> | 851.4985               | b <sub>8</sub> -H <sub>3</sub> PO <sub>4</sub>  | 1396.7795 | y <sub>14</sub> -H <sub>3</sub> PO <sub>4</sub> |
| 220.1368 <sup>+2</sup> | b <sub>4</sub> -H <sub>3</sub> PO <sub>4</sub> <sup>+2</sup> | 439.2663               | b <sub>4</sub> -H <sub>3</sub> PO <sub>4</sub>                | 625.3304               | b <sub>6</sub> -H <sub>3</sub> PO <sub>4</sub>                | 900.5513               | y <sub>9</sub>                                  | 1405.7087 | b <sub>13</sub>                                 |
| 248.6475 <sup>+2</sup> | b <sub>5</sub> -H <sub>3</sub> PO <sub>4</sub> <sup>+2</sup> | 450.7793 <sup>+2</sup> | y <sub>9</sub> <sup>+2</sup>                                  | 634.8641 <sup>+2</sup> | y <sub>13</sub> -H <sub>3</sub> PO <sub>4</sub> <sup>+2</sup> | 908.52                 | b <sub>9</sub> -H <sub>3</sub> PO <sub>4</sub>  | 1476.7458 | b <sub>14</sub>                                 |
| 257.1608               | b <sub>2</sub>                                               | 454.7636 <sup>+2</sup> | b <sub>9</sub> -H <sub>3</sub> PO <sub>4</sub> <sup>+2</sup>  | 654.3695 <sup>+2</sup> | b <sub>13</sub> -H <sub>3</sub> PO <sub>4</sub> <sup>+2</sup> | 949.4754               | b <sub>8</sub>                                  | 1494.7564 | y <sub>14</sub>                                 |
| 258.6606 <sup>+2</sup> | y <sub>5</sub> <sup>+2</sup>                                 | 475.2414 <sup>+2</sup> | b <sub>8</sub> <sup>+2</sup>                                  | 667.8394 <sup>+2</sup> | b <sub>12</sub> <sup>+2</sup>                                 | 1006.4969              | b <sub>9</sub>                                  | 1524.8744 | MH-H <sub>3</sub> PO <sub>4</sub>               |
| 269.1253 <sup>+2</sup> | b <sub>4</sub> <sup>+2</sup>                                 | 496.2878               | b <sub>5</sub> -H <sub>3</sub> PO <sub>4</sub>                | 674.3832               | y <sub>7</sub>                                                | 1009.5677              | b <sub>10</sub> -H <sub>3</sub> PO <sub>4</sub> | 1622.8513 | MH                                              |
| 289.187                | y <sub>3</sub>                                               | 503.7521 <sup>+2</sup> | b <sub>9</sub> <sup>+2</sup>                                  | 683.8525 <sup>+2</sup> | y <sub>13</sub> <sup>+2</sup>                                 | 1029.5939              | y <sub>10</sub>                                 |           |                                                 |
| 297.6360 <sup>+2</sup> | b <sub>5</sub> <sup>+2</sup>                                 | 505.2875 <sup>+2</sup> | b <sub>10</sub> -H <sub>3</sub> PO <sub>4</sub> <sup>+2</sup> | 689.8881 <sup>+2</sup> | b <sub>14</sub> -H <sub>3</sub> PO <sub>4</sub> <sup>+2</sup> | 1086.6154              | y <sub>11</sub>                                 |           |                                                 |
| 309.1845 <sup>+2</sup> | y <sub>6</sub> <sup>+2</sup>                                 | 515.3006 <sup>+2</sup> | y <sub>10</sub> <sup>+2</sup>                                 | 698.8934 <sup>+2</sup> | y <sub>14</sub> -H <sub>3</sub> PO <sub>4</sub> <sup>+2</sup> | 1107.5446              | b <sub>10</sub>                                 |           |                                                 |
| 313.1688 <sup>+2</sup> | b <sub>6</sub> -H <sub>3</sub> PO <sub>4</sub> <sup>+2</sup> | 516.314                | y <sub>5</sub>                                                | 703.3580 <sup>+2</sup> | b <sub>13</sub> <sup>+2</sup>                                 | 1122.6517              | b <sub>11</sub> -H <sub>3</sub> PO <sub>4</sub> |           |                                                 |

MS/MS Fragmentation of KVAVYIIVDEsNVK  
 Found in IPI00419166, hypothetical protein LOC644815

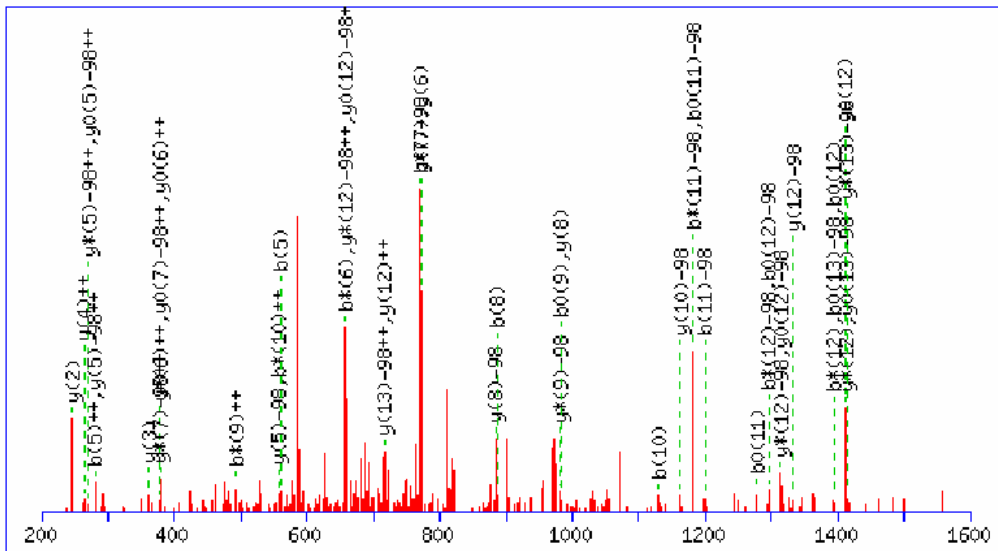

|                        |                                                              |                        |                                                              |                        |                                                               |                        |                                                               |           |                                                 |
|------------------------|--------------------------------------------------------------|------------------------|--------------------------------------------------------------|------------------------|---------------------------------------------------------------|------------------------|---------------------------------------------------------------|-----------|-------------------------------------------------|
| 74.0600 <sup>+2</sup>  | y <sub>1</sub> <sup>+2</sup>                                 | 337.7154 <sup>+2</sup> | b <sub>6</sub> <sup>+2</sup>                                 | 561.3395               | b <sub>5</sub>                                                | 715.8981 <sup>+2</sup> | y <sub>13</sub> -H <sub>3</sub> PO <sub>4</sub> <sup>+2</sup> | 1161.615  | y <sub>10</sub> -H <sub>3</sub> PO <sub>4</sub> |
| 114.5890 <sup>+2</sup> | b <sub>2</sub> <sup>+2</sup>                                 | 360.2241               | y <sub>3</sub>                                               | 565.8264 <sup>+2</sup> | b <sub>10</sub> <sup>+2</sup>                                 | 755.8813 <sup>+2</sup> | b <sub>13</sub> <sup>+2</sup>                                 | 1199.6671 | b <sub>11</sub> -H <sub>3</sub> PO <sub>4</sub> |
| 123.5942 <sup>+2</sup> | y <sub>2</sub> <sup>+2</sup>                                 | 386.1497 <sup>+2</sup> | y <sub>6</sub> <sup>+2</sup>                                 | 581.3111 <sup>+2</sup> | y <sub>10</sub> -H <sub>3</sub> PO <sub>4</sub> <sup>+2</sup> | 764.8866 <sup>+2</sup> | y <sub>13</sub> <sup>+2</sup>                                 | 1259.5919 | y <sub>10</sub>                                 |
| 147.1128               | y <sub>1</sub>                                               | 386.6954 <sup>+2</sup> | y <sub>7</sub> -H <sub>3</sub> PO <sub>4</sub> <sup>+2</sup> | 600.3372 <sup>+2</sup> | b <sub>11</sub> -H <sub>3</sub> PO <sub>4</sub> <sup>+2</sup> | 771.292                | y <sub>6</sub>                                                | 1260.6834 | y <sub>11</sub> -H <sub>3</sub> PO <sub>4</sub> |
| 150.1075 <sup>+2</sup> | b <sub>3</sub> <sup>+2</sup>                                 | 394.2575 <sup>+2</sup> | b <sub>7</sub> <sup>+2</sup>                                 | 630.2996 <sup>+2</sup> | y <sub>10</sub> <sup>+2</sup>                                 | 772.3836               | y <sub>7</sub> -H <sub>3</sub> PO <sub>4</sub>                | 1297.6439 | b <sub>11</sub>                                 |
| 180.6157 <sup>+2</sup> | y <sub>3</sub> <sup>+2</sup>                                 | 398.2762               | b <sub>4</sub>                                               | 630.8454 <sup>+2</sup> | y <sub>11</sub> -H <sub>3</sub> PO <sub>4</sub> <sup>+2</sup> | 779.9456 <sup>+2</sup> | MH-H <sub>3</sub> PO <sub>4</sub> <sup>+2</sup>               | 1313.71   | b <sub>12</sub> -H <sub>3</sub> PO <sub>4</sub> |
| 199.6417 <sup>+2</sup> | b <sub>4</sub> <sup>+2</sup>                                 | 429.2456               | y <sub>4</sub> -H <sub>3</sub> PO <sub>4</sub>               | 649.3256 <sup>+2</sup> | b <sub>11</sub> <sup>+2</sup>                                 | 787.5076               | b <sub>7</sub>                                                | 1331.7205 | y <sub>12</sub> -H <sub>3</sub> PO <sub>4</sub> |
| 215.1264 <sup>+2</sup> | y <sub>4</sub> -H <sub>3</sub> PO <sub>4</sub> <sup>+2</sup> | 435.6839 <sup>+2</sup> | y <sub>7</sub> <sup>+2</sup>                                 | 656.2651               | y <sub>5</sub>                                                | 828.9340 <sup>+2</sup> | MH <sup>+2</sup>                                              | 1358.6603 | y <sub>11</sub>                                 |
| 228.1707               | b <sub>2</sub>                                               | 443.2374 <sup>+2</sup> | y <sub>8</sub> -H <sub>3</sub> PO <sub>4</sub> <sup>+2</sup> | 657.3586 <sup>+2</sup> | b <sub>12</sub> -H <sub>3</sub> PO <sub>4</sub> <sup>+2</sup> | 870.3605               | y <sub>7</sub>                                                | 1411.6869 | b <sub>12</sub>                                 |
| 246.1812               | y <sub>2</sub>                                               | 443.7917 <sup>+2</sup> | b <sub>8</sub> <sup>+2</sup>                                 | 666.3639 <sup>+2</sup> | y <sub>12</sub> -H <sub>3</sub> PO <sub>4</sub> <sup>+2</sup> | 885.4676               | y <sub>8</sub> -H <sub>3</sub> PO <sub>4</sub>                | 1412.7784 | b <sub>13</sub> -H <sub>3</sub> PO <sub>4</sub> |
| 264.1149 <sup>+2</sup> | y <sub>4</sub> <sup>+2</sup>                                 | 492.2259 <sup>+2</sup> | y <sub>8</sub> <sup>+2</sup>                                 | 673.3151               | y <sub>6</sub> -H <sub>3</sub> PO <sub>4</sub>                | 886.5761               | b <sub>8</sub>                                                | 1429.6974 | y <sub>12</sub>                                 |
| 279.6477 <sup>+2</sup> | y <sub>5</sub> -H <sub>3</sub> PO <sub>4</sub> <sup>+2</sup> | 499.7795 <sup>+2</sup> | y <sub>9</sub> -H <sub>3</sub> PO <sub>4</sub> <sup>+2</sup> | 674.4236               | b <sub>6</sub>                                                | 983.4445               | y <sub>8</sub>                                                | 1430.789  | y <sub>13</sub> -H <sub>3</sub> PO <sub>4</sub> |
| 281.1734 <sup>+2</sup> | b <sub>5</sub> <sup>+2</sup>                                 | 501.3051 <sup>+2</sup> | b <sub>9</sub> <sup>+2</sup>                                 | 679.8338 <sup>+2</sup> | y <sub>11</sub> <sup>+2</sup>                                 | 998.5517               | y <sub>9</sub> -H <sub>3</sub> PO <sub>4</sub>                | 1510.7553 | b <sub>13</sub>                                 |
| 299.2078               | b <sub>3</sub>                                               | 527.2225               | y <sub>4</sub>                                               | 706.3471 <sup>+2</sup> | b <sub>12</sub> <sup>+2</sup>                                 | 1001.603               | b <sub>9</sub>                                                | 1528.7659 | y <sub>13</sub>                                 |
| 328.6362 <sup>+2</sup> | y <sub>5</sub> <sup>+2</sup>                                 | 548.7679 <sup>+2</sup> | y <sub>9</sub> <sup>+2</sup>                                 | 706.8928 <sup>+2</sup> | b <sub>13</sub> -H <sub>3</sub> PO <sub>4</sub> <sup>+2</sup> | 1096.5286              | y <sub>9</sub>                                                | 1558.8839 | MH-H <sub>3</sub> PO <sub>4</sub>               |
| 337.1612 <sup>+2</sup> | y <sub>6</sub> -H <sub>3</sub> PO <sub>4</sub> <sup>+2</sup> | 558.2882               | y <sub>5</sub> -H <sub>3</sub> PO <sub>4</sub>               | 715.3524 <sup>+2</sup> | y <sub>12</sub> <sup>+2</sup>                                 | 1130.6456              | b <sub>10</sub>                                               | 1656.8608 | MH                                              |

MS/MS Fragmentation of RHsEQVANGPTPPPR  
 Found in IPI00419166, hypothetical protein LOC644815

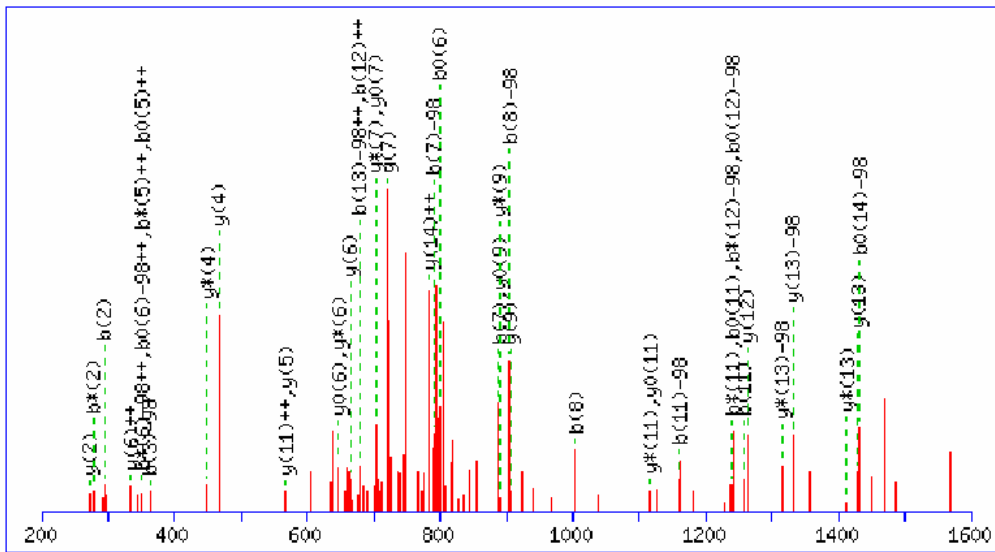

|                        |                                                              |                        |                                                               |                        |                                                               |                        |                                                 |           |                                                 |
|------------------------|--------------------------------------------------------------|------------------------|---------------------------------------------------------------|------------------------|---------------------------------------------------------------|------------------------|-------------------------------------------------|-----------|-------------------------------------------------|
| 88.0631 <sup>+2</sup>  | y <sub>1</sub> <sup>+2</sup>                                 | 363.1888               | b <sub>3</sub> -H <sub>3</sub> PO <sub>4</sub>                | 578.7484 <sup>+2</sup> | b <sub>10</sub> <sup>+2</sup>                                 | 774.8514 <sup>+2</sup> | b <sub>14</sub> <sup>+2</sup>                   | 1256.6131 | b <sub>12</sub> -H <sub>3</sub> PO <sub>4</sub> |
| 136.5895 <sup>+2</sup> | y <sub>2</sub> <sup>+2</sup>                                 | 369.2245               | y <sub>3</sub>                                                | 580.2838 <sup>+2</sup> | b <sub>11</sub> -H <sub>3</sub> PO <sub>4</sub> <sup>+2</sup> | 783.8567 <sup>+2</sup> | y <sub>14</sub> <sup>+2</sup>                   | 1257.5372 | b <sub>11</sub>                                 |
| 147.5873 <sup>+2</sup> | b <sub>2</sub> <sup>+2</sup>                                 | 395.7014 <sup>+2</sup> | b <sub>7</sub> -H <sub>3</sub> PO <sub>4</sub> <sup>+2</sup>  | 590.2083               | b <sub>4</sub>                                                | 790.3955               | b <sub>7</sub> -H <sub>3</sub> PO <sub>4</sub>  | 1262.6488 | y <sub>12</sub>                                 |
| 175.119                | y <sub>1</sub>                                               | 409.1713 <sup>+2</sup> | b <sub>6</sub> <sup>+2</sup>                                  | 620.2899               | b <sub>5</sub> -H <sub>3</sub> PO <sub>4</sub>                | 812.9188 <sup>+2</sup> | MH-H <sub>3</sub> PO <sub>4</sub> <sup>+2</sup> | 1331.6702 | y <sub>13</sub> -H <sub>3</sub> PO <sub>4</sub> |
| 182.0980 <sup>+2</sup> | b <sub>3</sub> -H <sub>3</sub> PO <sub>4</sub> <sup>+2</sup> | 418.2247 <sup>+2</sup> | y <sub>8</sub> <sup>+2</sup>                                  | 628.8102 <sup>+2</sup> | b <sub>12</sub> -H <sub>3</sub> PO <sub>4</sub> <sup>+2</sup> | 817.3352               | b <sub>6</sub>                                  | 1353.6658 | b <sub>13</sub> -H <sub>3</sub> PO <sub>4</sub> |
| 185.1159 <sup>+2</sup> | y <sub>3</sub> <sup>+2</sup>                                 | 444.6898 <sup>+2</sup> | b <sub>7</sub> <sup>+2</sup>                                  | 629.2722 <sup>+2</sup> | b <sub>11</sub> <sup>+2</sup>                                 | 835.4421               | y <sub>8</sub>                                  | 1354.59   | b <sub>12</sub>                                 |
| 231.0865 <sup>+2</sup> | b <sub>3</sub> <sup>+2</sup>                                 | 452.7228 <sup>+2</sup> | b <sub>8</sub> -H <sub>3</sub> PO <sub>4</sub> <sup>+2</sup>  | 631.8280 <sup>+2</sup> | y <sub>12</sub> <sup>+2</sup>                                 | 861.9072 <sup>+2</sup> | MH <sup>+2</sup>                                | 1429.6471 | y <sub>13</sub>                                 |
| 233.6423 <sup>+2</sup> | y <sub>4</sub> <sup>+2</sup>                                 | 453.7432 <sup>+2</sup> | y <sub>9</sub> <sup>+2</sup>                                  | 664.3777               | y <sub>6</sub>                                                | 888.3724               | b <sub>7</sub>                                  | 1450.7186 | b <sub>14</sub> -H <sub>3</sub> PO <sub>4</sub> |
| 246.6193 <sup>+2</sup> | b <sub>4</sub> -H <sub>3</sub> PO <sub>4</sub> <sup>+2</sup> | 461.1657               | b <sub>3</sub>                                                | 666.3388 <sup>+2</sup> | y <sub>13</sub> -H <sub>3</sub> PO <sub>4</sub> <sup>+2</sup> | 904.4384               | b <sub>8</sub> -H <sub>3</sub> PO <sub>4</sub>  | 1451.6427 | b <sub>13</sub>                                 |
| 272.1717               | y <sub>2</sub>                                               | 466.2772               | y <sub>4</sub>                                                | 677.3365 <sup>+2</sup> | b <sub>13</sub> -H <sub>3</sub> PO <sub>4</sub> <sup>+2</sup> | 906.4792               | y <sub>9</sub>                                  | 1468.7292 | y <sub>14</sub> -H <sub>3</sub> PO <sub>4</sub> |
| 284.1661 <sup>+2</sup> | y <sub>5</sub> <sup>+2</sup>                                 | 481.2336 <sup>+2</sup> | b <sub>9</sub> -H <sub>3</sub> PO <sub>4</sub> <sup>+2</sup>  | 677.7986 <sup>+2</sup> | b <sub>12</sub> <sup>+2</sup>                                 | 961.4599               | b <sub>9</sub> -H <sub>3</sub> PO <sub>4</sub>  | 1548.6955 | b <sub>14</sub>                                 |
| 294.1673               | b <sub>2</sub>                                               | 492.2314               | b <sub>4</sub> -H <sub>3</sub> PO <sub>4</sub>                | 715.3272 <sup>+2</sup> | y <sub>13</sub> <sup>+2</sup>                                 | 1002.4153              | b <sub>8</sub>                                  | 1566.706  | y <sub>14</sub>                                 |
| 295.6078 <sup>+2</sup> | b <sub>3</sub> <sup>+2</sup>                                 | 501.7113 <sup>+2</sup> | b <sub>8</sub> <sup>+2</sup>                                  | 718.2668               | b <sub>5</sub>                                                | 1005.5476              | y <sub>10</sub>                                 | 1624.8303 | MH-H <sub>3</sub> PO <sub>4</sub>               |
| 310.6486 <sup>+2</sup> | b <sub>5</sub> -H <sub>3</sub> PO <sub>4</sub> <sup>+2</sup> | 503.2774 <sup>+2</sup> | y <sub>10</sub> <sup>+2</sup>                                 | 719.3583               | b <sub>6</sub> -H <sub>3</sub> PO <sub>4</sub>                | 1058.5126              | b <sub>10</sub> -H <sub>3</sub> PO <sub>4</sub> | 1722.8072 | MH                                              |
| 332.6925 <sup>+2</sup> | y <sub>6</sub> <sup>+2</sup>                                 | 529.7599 <sup>+2</sup> | b <sub>10</sub> -H <sub>3</sub> PO <sub>4</sub> <sup>+2</sup> | 721.3991               | y <sub>7</sub>                                                | 1059.4367              | b <sub>9</sub>                                  |           |                                                 |
| 359.6371 <sup>+2</sup> | b <sub>5</sub> <sup>+2</sup>                                 | 530.2220 <sup>+2</sup> | b <sub>9</sub> <sup>+2</sup>                                  | 725.8629 <sup>+2</sup> | b <sub>14</sub> -H <sub>3</sub> PO <sub>4</sub> <sup>+2</sup> | 1133.6062              | y <sub>11</sub>                                 |           |                                                 |
| 360.1828 <sup>+2</sup> | b <sub>6</sub> -H <sub>3</sub> PO <sub>4</sub> <sup>+2</sup> | 567.3067 <sup>+2</sup> | y <sub>11</sub> <sup>+2</sup>                                 | 726.3250 <sup>+2</sup> | b <sub>13</sub> <sup>+2</sup>                                 | 1156.4895              | b <sub>10</sub>                                 |           |                                                 |
| 361.2032 <sup>+2</sup> | y <sub>7</sub> <sup>+2</sup>                                 | 567.3249               | y <sub>5</sub>                                                | 734.8682 <sup>+2</sup> | y <sub>14</sub> -H <sub>3</sub> PO <sub>4</sub> <sup>+2</sup> | 1159.5603              | b <sub>11</sub> -H <sub>3</sub> PO <sub>4</sub> |           |                                                 |



MS/MS Fragmentation of APSATSPsGQLPHHSSTQPLDLAPGR  
 Found in IPI00735239, PREDICTED: similar to Ataxin-1

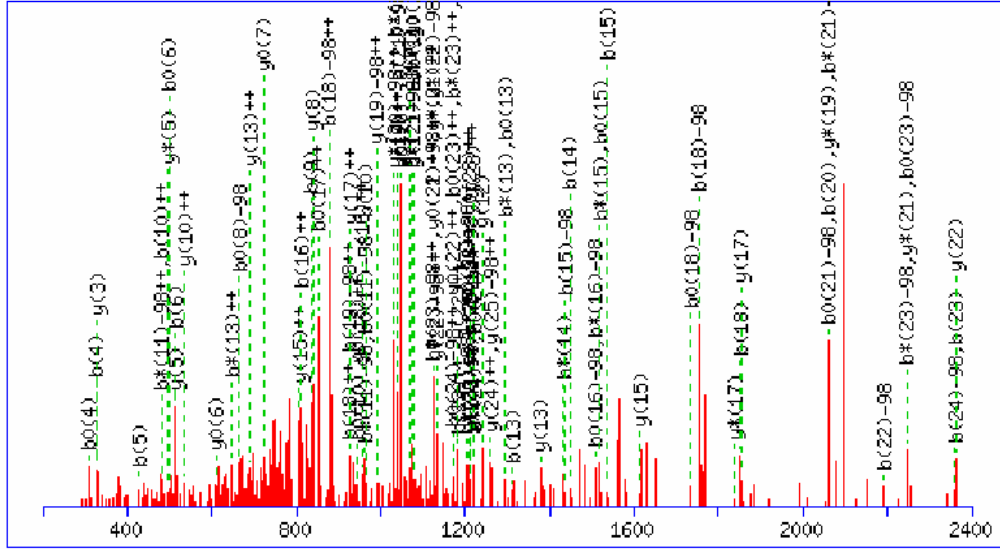

|                        |                                                               |                        |                                                               |                         |                                                               |                         |                                                               |           |                                                 |
|------------------------|---------------------------------------------------------------|------------------------|---------------------------------------------------------------|-------------------------|---------------------------------------------------------------|-------------------------|---------------------------------------------------------------|-----------|-------------------------------------------------|
| 88.0631 <sup>+2</sup>  | y <sub>1</sub> <sup>+2</sup>                                  | 689.8573 <sup>+2</sup> | y <sub>13</sub> <sup>+2</sup>                                 | 1031.4731 <sup>+2</sup> | b <sub>20</sub> <sup>+2</sup>                                 | 1260.6331 <sup>+2</sup> | y <sub>25</sub> -H <sub>3</sub> PO <sub>4</sub> <sup>+2</sup> | 2077.9815 | y <sub>19</sub>                                 |
| 116.5738 <sup>+2</sup> | y <sub>2</sub> <sup>+2</sup>                                  | 719.3471 <sup>+2</sup> | b <sub>15</sub> -H <sub>3</sub> PO <sub>4</sub> <sup>+2</sup> | 1039.0323 <sup>+2</sup> | y <sub>20</sub> -H <sub>3</sub> PO <sub>4</sub> <sup>+2</sup> | 1261.0952 <sup>+2</sup> | y <sub>24</sub> <sup>+2</sup>                                 | 2078.989  | b <sub>21</sub> -H <sub>3</sub> PO <sub>4</sub> |
| 165.1002 <sup>+2</sup> | y <sub>3</sub> <sup>+2</sup>                                  | 724.8195 <sup>+2</sup> | b <sub>14</sub> <sup>+2</sup>                                 | 1039.4944 <sup>+2</sup> | y <sub>19</sub> <sup>+2</sup>                                 | 1296.1517 <sup>+2</sup> | MH-H <sub>3</sub> PO <sub>4</sub> <sup>+2</sup>               | 2164.0894 | y <sub>21</sub> -H <sub>3</sub> PO <sub>4</sub> |
| 169.0972               | b <sub>2</sub>                                                | 738.3417               | b <sub>9</sub> -H <sub>3</sub> PO <sub>4</sub>                | 1039.9981 <sup>+2</sup> | b <sub>21</sub> -H <sub>3</sub> PO <sub>4</sub> <sup>+2</sup> | 1309.6216 <sup>+2</sup> | y <sub>25</sub> <sup>+2</sup>                                 | 2175.0343 | y <sub>20</sub>                                 |
| 175.119                | y <sub>1</sub>                                                | 741.4254               | y <sub>7</sub>                                                | 1067.5844               | y <sub>10</sub>                                               | 1311.5729               | b <sub>13</sub>                                               | 2176.9659 | b <sub>21</sub>                                 |
| 200.6188 <sup>+2</sup> | y <sub>4</sub> <sup>+2</sup>                                  | 758.3868 <sup>+2</sup> | y <sub>14</sub> <sup>+2</sup>                                 | 1076.5371               | b <sub>12</sub> -H <sub>3</sub> PO <sub>4</sub>               | 1345.1401 <sup>+2</sup> | MH <sup>+2</sup>                                              | 2192.0731 | b <sub>22</sub> -H <sub>3</sub> PO <sub>4</sub> |
| 232.1404               | y <sub>2</sub>                                                | 762.8631 <sup>+2</sup> | b <sub>16</sub> -H <sub>3</sub> PO <sub>4</sub> <sup>+2</sup> | 1077.4612               | b <sub>11</sub>                                               | 1350.6549               | b <sub>14</sub> -H <sub>3</sub> PO <sub>4</sub>               | 2262.0663 | y <sub>21</sub>                                 |
| 256.1292               | b <sub>3</sub>                                                | 768.3356 <sup>+2</sup> | b <sub>15</sub> <sup>+2</sup>                                 | 1082.5483 <sup>+2</sup> | y <sub>21</sub> -H <sub>3</sub> PO <sub>4</sub> <sup>+2</sup> | 1378.7074               | y <sub>13</sub>                                               | 2263.1102 | b <sub>23</sub> -H <sub>3</sub> PO <sub>4</sub> |
| 257.1608 <sup>+2</sup> | y <sub>5</sub> <sup>+2</sup>                                  | 779.2971               | b <sub>8</sub>                                                | 1088.0208 <sup>+2</sup> | y <sub>20</sub> <sup>+2</sup>                                 | 1437.687                | b <sub>15</sub> -H <sub>3</sub> PO <sub>4</sub>               | 2265.1371 | y <sub>22</sub> -H <sub>3</sub> PO <sub>4</sub> |
| 314.6743 <sup>+2</sup> | y <sub>6</sub> <sup>+2</sup>                                  | 806.9132 <sup>+2</sup> | y <sub>15</sub> <sup>+2</sup>                                 | 1088.9866 <sup>+2</sup> | b <sub>21</sub> <sup>+2</sup>                                 | 1448.6318               | b <sub>14</sub>                                               | 2290.05   | b <sub>22</sub>                                 |
| 327.1663               | b <sub>4</sub>                                                | 811.8516 <sup>+2</sup> | b <sub>16</sub> <sup>+2</sup>                                 | 1096.5402 <sup>+2</sup> | b <sub>22</sub> -H <sub>3</sub> PO <sub>4</sub> <sup>+2</sup> | 1515.7663               | y <sub>14</sub>                                               | 2336.1742 | y <sub>23</sub> -H <sub>3</sub> PO <sub>4</sub> |
| 329.1932               | y <sub>3</sub>                                                | 813.3870 <sup>+2</sup> | b <sub>17</sub> -H <sub>3</sub> PO <sub>4</sub> <sup>+2</sup> | 1131.5368 <sup>+2</sup> | y <sub>21</sub> <sup>+2</sup>                                 | 1524.719                | b <sub>16</sub> -H <sub>3</sub> PO <sub>4</sub>               | 2360.1629 | b <sub>24</sub> -H <sub>3</sub> PO <sub>4</sub> |
| 371.2163 <sup>+2</sup> | y <sub>7</sub> <sup>+2</sup>                                  | 836.3186               | b <sub>9</sub>                                                | 1132.0587 <sup>+2</sup> | b <sub>23</sub> -H <sub>3</sub> PO <sub>4</sub> <sup>+2</sup> | 1535.6638               | b <sub>15</sub>                                               | 2361.0871 | b <sub>23</sub>                                 |
| 400.2303               | y <sub>4</sub>                                                | 838.4781               | y <sub>8</sub>                                                | 1133.0722 <sup>+2</sup> | y <sub>22</sub> -H <sub>3</sub> PO <sub>4</sub> <sup>+2</sup> | 1612.819                | y <sub>15</sub>                                               | 2363.114  | y <sub>22</sub>                                 |
| 419.7427 <sup>+2</sup> | y <sub>8</sub> <sup>+2</sup>                                  | 862.3754 <sup>+2</sup> | b <sub>17</sub> <sup>+2</sup>                                 | 1145.5286 <sup>+2</sup> | b <sub>22</sub> <sup>+2</sup>                                 | 1622.6959               | b <sub>16</sub>                                               | 2417.1844 | b <sub>25</sub> -H <sub>3</sub> PO <sub>4</sub> |
| 428.214                | b <sub>5</sub>                                                | 863.4552 <sup>+2</sup> | y <sub>16</sub> <sup>+2</sup>                                 | 1154.6164               | y <sub>11</sub>                                               | 1625.7667               | b <sub>17</sub> -H <sub>3</sub> PO <sub>4</sub>               | 2423.2062 | y <sub>24</sub> -H <sub>3</sub> PO <sub>4</sub> |
| 483.7720 <sup>+2</sup> | y <sub>9</sub> <sup>+2</sup>                                  | 866.4003               | b <sub>10</sub> -H <sub>3</sub> PO <sub>4</sub>               | 1168.5907 <sup>+2</sup> | y <sub>23</sub> -H <sub>3</sub> PO <sub>4</sub> <sup>+2</sup> | 1723.7436               | b <sub>17</sub>                                               | 2434.1511 | y <sub>23</sub>                                 |
| 513.3144               | y <sub>5</sub>                                                | 877.4163 <sup>+2</sup> | b <sub>18</sub> -H <sub>3</sub> PO <sub>4</sub> <sup>+2</sup> | 1174.514                | b <sub>12</sub>                                               | 1725.9031               | y <sub>16</sub>                                               | 2458.1398 | b <sub>24</sub>                                 |
| 515.246                | b <sub>6</sub>                                                | 925.9426 <sup>+2</sup> | b <sub>19</sub> -H <sub>3</sub> PO <sub>4</sub> <sup>+2</sup> | 1180.5851 <sup>+2</sup> | b <sub>24</sub> -H <sub>3</sub> PO <sub>4</sub> <sup>+2</sup> | 1753.8252               | b <sub>18</sub> -H <sub>3</sub> PO <sub>4</sub>               | 2515.1613 | b <sub>25</sub>                                 |
| 534.2958 <sup>+2</sup> | y <sub>10</sub> <sup>+2</sup>                                 | 926.4047 <sup>+2</sup> | b <sub>18</sub> <sup>+2</sup>                                 | 1181.0472 <sup>+2</sup> | b <sub>23</sub> <sup>+2</sup>                                 | 1850.878                | b <sub>19</sub> -H <sub>3</sub> PO <sub>4</sub>               | 2520.259  | y <sub>25</sub> -H <sub>3</sub> PO <sub>4</sub> |
| 577.8118 <sup>+2</sup> | y <sub>11</sub> <sup>+2</sup>                                 | 927.4845 <sup>+2</sup> | y <sub>17</sub> <sup>+2</sup>                                 | 1182.0606 <sup>+2</sup> | y <sub>22</sub> <sup>+2</sup>                                 | 1851.8021               | b <sub>18</sub>                                               | 2521.1831 | y <sub>24</sub>                                 |
| 607.3016 <sup>+2</sup> | b <sub>13</sub> -H <sub>3</sub> PO <sub>4</sub> <sup>+2</sup> | 955.9952 <sup>+2</sup> | y <sub>18</sub> <sup>+2</sup>                                 | 1209.0958 <sup>+2</sup> | b <sub>25</sub> -H <sub>3</sub> PO <sub>4</sub> <sup>+2</sup> | 1853.9617               | y <sub>17</sub>                                               | 2591.2961 | MH-H <sub>3</sub> PO <sub>4</sub>               |
| 612.2988               | b <sub>7</sub>                                                | 964.3772               | b <sub>10</sub>                                               | 1212.1067 <sup>+2</sup> | y <sub>24</sub> -H <sub>3</sub> PO <sub>4</sub> <sup>+2</sup> | 1910.9831               | y <sub>18</sub>                                               | 2618.2359 | y <sub>25</sub>                                 |
| 621.3279 <sup>+2</sup> | y <sub>12</sub> <sup>+2</sup>                                 | 966.5367               | y <sub>9</sub>                                                | 1213.596                | b <sub>13</sub> -H <sub>3</sub> PO <sub>4</sub>               | 1948.8549               | b <sub>19</sub>                                               | 2689.273  | MH                                              |
| 628.3413               | y <sub>6</sub>                                                | 974.9311 <sup>+2</sup> | b <sub>19</sub> <sup>+2</sup>                                 | 1217.5792 <sup>+2</sup> | y <sub>23</sub> <sup>+2</sup>                                 | 1963.9621               | b <sub>20</sub> -H <sub>3</sub> PO <sub>4</sub>               |           |                                                 |
| 656.2901 <sup>+2</sup> | b <sub>13</sub> <sup>+2</sup>                                 | 979.4843               | b <sub>11</sub> -H <sub>3</sub> PO <sub>4</sub>               | 1229.5736 <sup>+2</sup> | b <sub>24</sub> <sup>+2</sup>                                 | 1980.0046               | y <sub>19</sub> -H <sub>3</sub> PO <sub>4</sub>               |           |                                                 |
| 675.8311 <sup>+2</sup> | b <sub>14</sub> -H <sub>3</sub> PO <sub>4</sub> <sup>+2</sup> | 982.4847 <sup>+2</sup> | b <sub>20</sub> -H <sub>3</sub> PO <sub>4</sub> <sup>+2</sup> | 1241.6484               | y <sub>12</sub>                                               | 2061.939                | b <sub>20</sub>                                               |           |                                                 |
| 681.3202               | b <sub>8</sub> -H <sub>3</sub> PO <sub>4</sub>                | 990.5059 <sup>+2</sup> | y <sub>19</sub> -H <sub>3</sub> PO <sub>4</sub> <sup>+2</sup> | 1258.0843 <sup>+2</sup> | b <sub>25</sub> <sup>+2</sup>                                 | 2077.0574               | y <sub>20</sub> -H <sub>3</sub> PO <sub>4</sub>               |           |                                                 |

MS/MS Fragmentation of S(SS)PAPADIAQTVQEDLR  
 Found in IPI00012442, Ras-GTPase-activating protein-binding protein 1

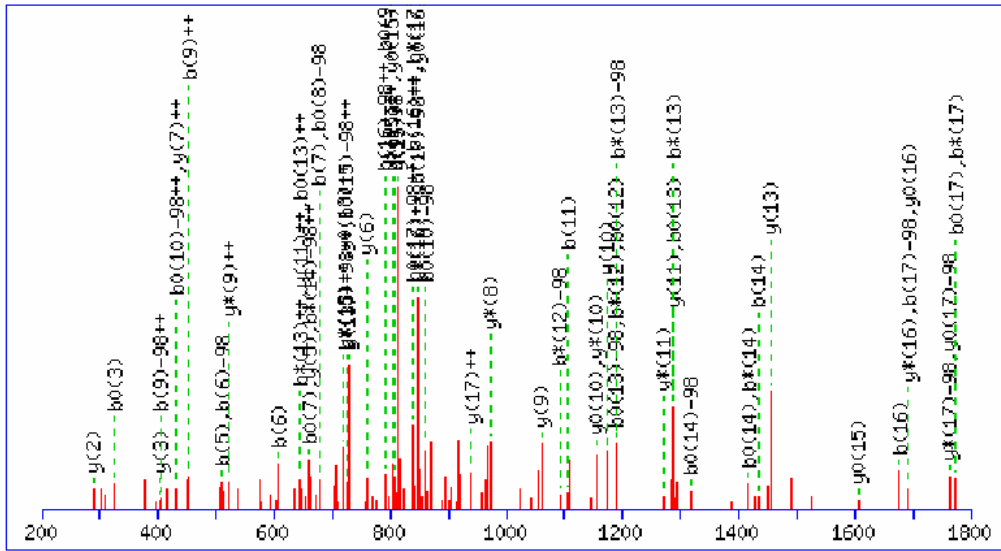

|                        |                                                |                        |                                                |                        |                                                               |           |                                                 |           |                                                 |
|------------------------|------------------------------------------------|------------------------|------------------------------------------------|------------------------|---------------------------------------------------------------|-----------|-------------------------------------------------|-----------|-------------------------------------------------|
| 88.0631 <sup>+2</sup>  | y <sub>1</sub> <sup>+2</sup>                   | 430.7272 <sup>+2</sup> | y <sub>7</sub> <sup>+2</sup>                   | 728.3755 <sup>+2</sup> | y <sub>13</sub> <sup>+2</sup>                                 | 988.5058  | y <sub>8</sub>                                  | 1526.7809 | y <sub>14</sub>                                 |
| 144.6051 <sup>+2</sup> | y <sub>2</sub> <sup>+2</sup>                   | 439.1225               | b <sub>4</sub>                                 | 759.3995               | y <sub>6</sub>                                                | 1007.4793 | b <sub>11</sub> -H <sub>3</sub> PO <sub>4</sub> | 1562.6734 | b <sub>15</sub>                                 |
| 157.0608               | b <sub>2</sub> -H <sub>3</sub> PO <sub>4</sub> | 494.7565 <sup>+2</sup> | y <sub>8</sub> <sup>+2</sup>                   | 763.8941 <sup>+2</sup> | y <sub>14</sub> <sup>+2</sup>                                 | 1059.5429 | y <sub>9</sub>                                  | 1579.7235 | b <sub>16</sub> -H <sub>3</sub> PO <sub>4</sub> |
| 175.119                | y <sub>1</sub>                                 | 509.2354               | b <sub>6</sub> -H <sub>3</sub> PO <sub>4</sub> | 793.2764               | b <sub>8</sub>                                                | 1105.4561 | b <sub>11</sub>                                 | 1623.8337 | y <sub>15</sub>                                 |
| 202.1186 <sup>-2</sup> | y <sub>3</sub> <sup>+2</sup>                   | 510.1596               | b <sub>5</sub>                                 | 808.3836               | b <sub>9</sub> -H <sub>3</sub> PO <sub>4</sub>                | 1108.5269 | b <sub>12</sub> -H <sub>3</sub> PO <sub>4</sub> | 1677.7004 | b <sub>16</sub>                                 |
| 244.0928               | b <sub>3</sub> -H <sub>3</sub> PO <sub>4</sub> | 530.2751 <sup>+2</sup> | y <sub>9</sub> <sup>+2</sup>                   | 812.4205 <sup>+2</sup> | y <sub>15</sub> <sup>+2</sup>                                 | 1172.627  | y <sub>10</sub>                                 | 1692.8075 | b <sub>17</sub> -H <sub>3</sub> PO <sub>4</sub> |
| 255.0377               | b <sub>2</sub>                                 | 532.2726               | y <sub>4</sub>                                 | 855.9365 <sup>+2</sup> | y <sub>16</sub> <sup>+2</sup>                                 | 1206.5038 | b <sub>12</sub>                                 | 1710.8657 | y <sub>16</sub>                                 |
| 266.6399 <sup>+2</sup> | y <sub>4</sub> <sup>+2</sup>                   | 580.2726               | b <sub>7</sub> -H <sub>3</sub> PO <sub>4</sub> | 860.4472               | y <sub>7</sub>                                                | 1207.5953 | b <sub>13</sub> -H <sub>3</sub> PO <sub>4</sub> | 1779.8872 | y <sub>17</sub> -H <sub>3</sub> PO <sub>4</sub> |
| 288.203                | y <sub>2</sub>                                 | 586.8171 <sup>+2</sup> | y <sub>10</sub> <sup>+2</sup>                  | 879.4207               | b <sub>10</sub> -H <sub>3</sub> PO <sub>4</sub>               | 1287.6539 | y <sub>11</sub>                                 | 1790.7844 | b <sub>17</sub>                                 |
| 330.6692 <sup>+2</sup> | y <sub>5</sub> <sup>+2</sup>                   | 607.2123               | b <sub>6</sub>                                 | 890.4472 <sup>+2</sup> | y <sub>17</sub> -H <sub>3</sub> PO <sub>4</sub> <sup>+2</sup> | 1305.5722 | b <sub>13</sub>                                 | 1866.9192 | MH-H <sub>3</sub> PO <sub>4</sub>               |
| 341.1456               | b <sub>4</sub> -H <sub>3</sub> PO <sub>4</sub> | 644.3306 <sup>+2</sup> | y <sub>11</sub> <sup>+2</sup>                  | 906.3605               | b <sub>9</sub>                                                | 1335.6539 | b <sub>14</sub> -H <sub>3</sub> PO <sub>4</sub> | 1877.8641 | y <sub>17</sub>                                 |
| 342.0697               | b <sub>3</sub>                                 | 660.3311               | y <sub>5</sub>                                 | 933.9632 <sup>+2</sup> | MH-H <sub>3</sub> PO <sub>4</sub> <sup>+2</sup>               | 1358.691  | y <sub>12</sub>                                 | 1964.8961 | MH                                              |
| 380.2034 <sup>+2</sup> | y <sub>6</sub> <sup>+2</sup>                   | 678.2494               | b <sub>7</sub>                                 | 939.4357 <sup>+2</sup> | y <sub>17</sub> <sup>+2</sup>                                 | 1433.6308 | b <sub>14</sub>                                 |           |                                                 |
| 403.23                 | y <sub>3</sub>                                 | 679.8492 <sup>+2</sup> | y <sub>12</sub> <sup>+2</sup>                  | 977.3976               | b <sub>10</sub>                                               | 1455.7438 | y <sub>13</sub>                                 |           |                                                 |
| 412.1827               | b <sub>5</sub> -H <sub>3</sub> PO <sub>4</sub> | 695.2995               | b <sub>8</sub> -H <sub>3</sub> PO <sub>4</sub> | 982.9517 <sup>+2</sup> | MH <sup>+2</sup>                                              | 1464.6965 | b <sub>15</sub> -H <sub>3</sub> PO <sub>4</sub> |           |                                                 |

MS/MS Fragmentation of VVGKCGGYCGKCTPSSGtGLEVR  
 Found in IPI00386763, Isoform 1 of ADAMTS-9 precursor

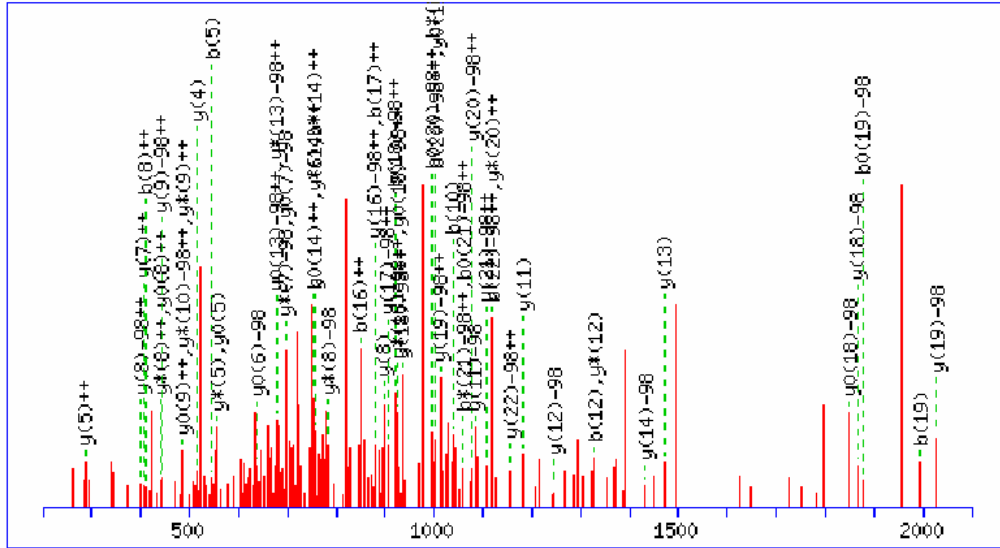

|                        |                                                               |                        |                                                               |                         |                                                               |                         |                                                               |           |                                                 |
|------------------------|---------------------------------------------------------------|------------------------|---------------------------------------------------------------|-------------------------|---------------------------------------------------------------|-------------------------|---------------------------------------------------------------|-----------|-------------------------------------------------|
| 88.0631 <sup>+2</sup>  | y <sub>1</sub> <sup>+2</sup>                                  | 493.2211 <sup>+2</sup> | y <sub>9</sub> <sup>+2</sup>                                  | 800.4261                | y <sub>8</sub> -H <sub>3</sub> PO <sub>4</sub>                | 1041.9440 <sup>+2</sup> | y <sub>20</sub> <sup>+2</sup>                                 | 1696.7782 | y <sub>17</sub> -H <sub>3</sub> PO <sub>4</sub> |
| 137.5973 <sup>+2</sup> | y <sub>2</sub> <sup>+2</sup>                                  | 516.314                | y <sub>4</sub>                                                | 811.371                 | y <sub>7</sub>                                                | 1052.5016               | b <sub>11</sub>                                               | 1724.7553 | b <sub>19</sub> -H <sub>3</sub> PO <sub>4</sub> |
| 175.119                | y <sub>1</sub>                                                | 526.7544 <sup>+2</sup> | b <sub>11</sub> <sup>+2</sup>                                 | 820.3820 <sup>+2</sup>  | y <sub>16</sub> -H <sub>3</sub> PO <sub>4</sub> <sup>+2</sup> | 1070.4547 <sup>+2</sup> | y <sub>21</sub> <sup>+2</sup>                                 | 1737.7336 | y <sub>16</sub>                                 |
| 192.6339 <sup>+2</sup> | b <sub>4</sub> <sup>+2</sup>                                  | 541.7475 <sup>+2</sup> | y <sub>10</sub> <sup>+2</sup>                                 | 834.3706 <sup>+2</sup>  | b <sub>18</sub> -H <sub>3</sub> PO <sub>4</sub> <sup>+2</sup> | 1071.0005 <sup>+2</sup> | y <sub>22</sub> -H <sub>3</sub> PO <sub>4</sub> <sup>+2</sup> | 1753.7996 | y <sub>18</sub> -H <sub>3</sub> PO <sub>4</sub> |
| 199.1441               | b <sub>2</sub>                                                | 543.2829 <sup>+2</sup> | y <sub>11</sub> -H <sub>3</sub> PO <sub>4</sub> <sup>+2</sup> | 848.8927 <sup>+2</sup>  | y <sub>17</sub> -H <sub>3</sub> PO <sub>4</sub> <sup>+2</sup> | 1082.4673 <sup>+2</sup> | b <sub>22</sub> <sup>+2</sup>                                 | 1765.7107 | b <sub>18</sub>                                 |
| 202.1186 <sup>+2</sup> | y <sub>3</sub> <sup>+2</sup>                                  | 544.2912               | b <sub>6</sub>                                                | 862.8813 <sup>+2</sup>  | b <sub>19</sub> -H <sub>3</sub> PO <sub>4</sub> <sup>+2</sup> | 1082.4878               | y <sub>10</sub>                                               | 1794.755  | y <sub>17</sub>                                 |
| 244.1385 <sup>+2</sup> | b <sub>5</sub> <sup>+2</sup>                                  | 573.3355               | y <sub>5</sub>                                                | 867.3852                | b <sub>9</sub>                                                | 1085.5586               | y <sub>11</sub> -H <sub>3</sub> PO <sub>4</sub>               | 1822.7322 | b <sub>19</sub>                                 |
| 256.1656               | b <sub>3</sub>                                                | 578.2590 <sup>+2</sup> | b <sub>12</sub> <sup>+2</sup>                                 | 869.3704 <sup>+2</sup>  | y <sub>16</sub> <sup>+2</sup>                                 | 1119.9889 <sup>+2</sup> | y <sub>22</sub> <sup>+2</sup>                                 | 1837.8394 | b <sub>20</sub> -H <sub>3</sub> PO <sub>4</sub> |
| 258.6606 <sup>+2</sup> | y <sub>4</sub> <sup>+2</sup>                                  | 592.2714 <sup>+2</sup> | y <sub>11</sub> <sup>+2</sup>                                 | 877.4034 <sup>+2</sup>  | y <sub>18</sub> -H <sub>3</sub> PO <sub>4</sub> <sup>+2</sup> | 1120.5347 <sup>+2</sup> | MH-H <sub>3</sub> PO <sub>4</sub> <sup>+2</sup>               | 1851.7765 | y <sub>18</sub>                                 |
| 272.6492 <sup>+2</sup> | b <sub>6</sub> <sup>+2</sup>                                  | 594.7875 <sup>+2</sup> | y <sub>12</sub> -H <sub>3</sub> PO <sub>4</sub> <sup>+2</sup> | 883.3590 <sup>+2</sup>  | b <sub>18</sub> <sup>+2</sup>                                 | 1155.5108               | b <sub>12</sub>                                               | 1856.8088 | y <sub>19</sub> -H <sub>3</sub> PO <sub>4</sub> |
| 274.1874               | y <sub>2</sub>                                                | 601.3126               | b <sub>7</sub>                                                | 887.4581                | y <sub>9</sub> -H <sub>3</sub> PO <sub>4</sub>                | 1169.5231 <sup>+2</sup> | MH <sup>+2</sup>                                              | 1935.8163 | b <sub>20</sub>                                 |
| 287.1714 <sup>+2</sup> | y <sub>5</sub> <sup>+2</sup>                                  | 628.7829 <sup>+2</sup> | b <sub>13</sub> <sup>+2</sup>                                 | 897.8812 <sup>+2</sup>  | y <sub>17</sub> <sup>+2</sup>                                 | 1183.5355               | y <sub>11</sub>                                               | 1954.7857 | y <sub>19</sub>                                 |
| 301.1600 <sup>+2</sup> | b <sub>7</sub> <sup>+2</sup>                                  | 643.7760 <sup>+2</sup> | y <sub>12</sub> <sup>+2</sup>                                 | 898.403                 | y <sub>8</sub>                                                | 1188.5677               | y <sub>12</sub> -H <sub>3</sub> PO <sub>4</sub>               | 1966.882  | b <sub>21</sub> -H <sub>3</sub> PO <sub>4</sub> |
| 328.6899 <sup>+2</sup> | y <sub>6</sub> -H <sub>3</sub> PO <sub>4</sub> <sup>+2</sup>  | 656.3726               | y <sub>6</sub> -H <sub>3</sub> PO <sub>4</sub>                | 911.8697 <sup>+2</sup>  | b <sub>19</sub> <sup>+2</sup>                                 | 1256.5584               | b <sub>13</sub>                                               | 1984.9038 | y <sub>20</sub> -H <sub>3</sub> PO <sub>4</sub> |
| 357.2007 <sup>+2</sup> | y <sub>7</sub> -H <sub>3</sub> PO <sub>4</sub> <sup>+2</sup>  | 658.8350 <sup>+2</sup> | y <sub>13</sub> -H <sub>3</sub> PO <sub>4</sub> <sup>+2</sup> | 919.4233 <sup>+2</sup>  | b <sub>20</sub> -H <sub>3</sub> PO <sub>4</sub> <sup>+2</sup> | 1286.5446               | y <sub>12</sub>                                               | 2041.9252 | y <sub>21</sub> -H <sub>3</sub> PO <sub>4</sub> |
| 377.6784 <sup>+2</sup> | y <sub>6</sub> <sup>+2</sup>                                  | 677.3092 <sup>+2</sup> | b <sub>14</sub> <sup>+2</sup>                                 | 924.4066                | b <sub>10</sub>                                               | 1316.6627               | y <sub>13</sub> -H <sub>3</sub> PO <sub>4</sub>               | 2064.8589 | b <sub>21</sub>                                 |
| 382.6916 <sup>+2</sup> | b <sub>8</sub> <sup>+2</sup>                                  | 687.3457 <sup>+2</sup> | y <sub>14</sub> -H <sub>3</sub> PO <sub>4</sub> <sup>+2</sup> | 926.3919 <sup>+2</sup>  | y <sub>18</sub> <sup>+2</sup>                                 | 1353.6112               | b <sub>14</sub>                                               | 2065.9504 | b <sub>22</sub> -H <sub>3</sub> PO <sub>4</sub> |
| 384.2605               | b <sub>4</sub>                                                | 707.8234 <sup>+2</sup> | y <sub>13</sub> <sup>+2</sup>                                 | 928.9080 <sup>+2</sup>  | y <sub>19</sub> -H <sub>3</sub> PO <sub>4</sub> <sup>+2</sup> | 1373.6842               | y <sub>14</sub> -H <sub>3</sub> PO <sub>4</sub>               | 2082.8807 | y <sub>20</sub>                                 |
| 400.7167 <sup>+2</sup> | y <sub>8</sub> -H <sub>3</sub> PO <sub>4</sub> <sup>+2</sup>  | 713.3941               | y <sub>7</sub> -H <sub>3</sub> PO <sub>4</sub>                | 968.4118 <sup>+2</sup>  | b <sub>20</sub> <sup>+2</sup>                                 | 1414.6396               | y <sub>13</sub>                                               | 2139.9021 | y <sub>21</sub>                                 |
| 403.23                 | y <sub>3</sub>                                                | 720.8253 <sup>+2</sup> | b <sub>15</sub> <sup>+2</sup>                                 | 977.8965 <sup>+2</sup>  | y <sub>19</sub> <sup>+2</sup>                                 | 1440.6432               | b <sub>15</sub>                                               | 2140.9936 | y <sub>22</sub> -H <sub>3</sub> PO <sub>4</sub> |
| 406.1891 <sup>+2</sup> | y <sub>7</sub> <sup>+2</sup>                                  | 736.3342 <sup>+2</sup> | y <sub>14</sub> <sup>+2</sup>                                 | 983.9446 <sup>+2</sup>  | b <sub>21</sub> -H <sub>3</sub> PO <sub>4</sub> <sup>+2</sup> | 1471.6611               | y <sub>14</sub>                                               | 2163.9273 | b <sub>22</sub>                                 |
| 434.1962 <sup>+2</sup> | b <sub>9</sub> <sup>+2</sup>                                  | 738.8503 <sup>+2</sup> | y <sub>15</sub> -H <sub>3</sub> PO <sub>4</sub> <sup>+2</sup> | 984.5109                | y <sub>10</sub> -H <sub>3</sub> PO <sub>4</sub>               | 1476.6934               | y <sub>15</sub> -H <sub>3</sub> PO <sub>4</sub>               | 2238.9705 | y <sub>22</sub>                                 |
| 444.2327 <sup>+2</sup> | y <sub>9</sub> -H <sub>3</sub> PO <sub>4</sub> <sup>+2</sup>  | 754.3495               | y <sub>6</sub>                                                | 985.435                 | y <sub>9</sub>                                                | 1527.6753               | b <sub>16</sub>                                               | 2240.0621 | MH-H <sub>3</sub> PO <sub>4</sub>               |
| 449.7051 <sup>+2</sup> | y <sub>8</sub> <sup>+2</sup>                                  | 764.3413 <sup>+2</sup> | b <sub>16</sub> <sup>+2</sup>                                 | 992.9555 <sup>+2</sup>  | y <sub>20</sub> -H <sub>3</sub> PO <sub>4</sub> <sup>+2</sup> | 1574.6703               | y <sub>15</sub>                                               | 2338.0389 | MH                                              |
| 462.7069 <sup>+2</sup> | b <sub>10</sub> <sup>+2</sup>                                 | 764.376                | b <sub>8</sub>                                                | 1021.4663 <sup>+2</sup> | y <sub>21</sub> -H <sub>3</sub> PO <sub>4</sub> <sup>+2</sup> | 1584.6967               | b <sub>17</sub>                                               |           |                                                 |
| 487.2697               | b <sub>5</sub>                                                | 787.8388 <sup>+2</sup> | y <sub>15</sub> <sup>+2</sup>                                 | 1032.9331 <sup>+2</sup> | b <sub>21</sub> <sup>+2</sup>                                 | 1639.7567               | y <sub>16</sub> -H <sub>3</sub> PO <sub>4</sub>               |           |                                                 |
| 492.7591 <sup>+2</sup> | y <sub>10</sub> -H <sub>3</sub> PO <sub>4</sub> <sup>+2</sup> | 792.8520 <sup>+2</sup> | b <sub>17</sub> <sup>+2</sup>                                 | 1033.4788 <sup>+2</sup> | b <sub>22</sub> -H <sub>3</sub> PO <sub>4</sub> <sup>+2</sup> | 1667.7338               | b <sub>18</sub> -H <sub>3</sub> PO <sub>4</sub>               |           |                                                 |

MS/MS Fragmentation of QQsLPLRPIIPLVAR  
 Found in IPI00002515, TBC1 domain family member 22B

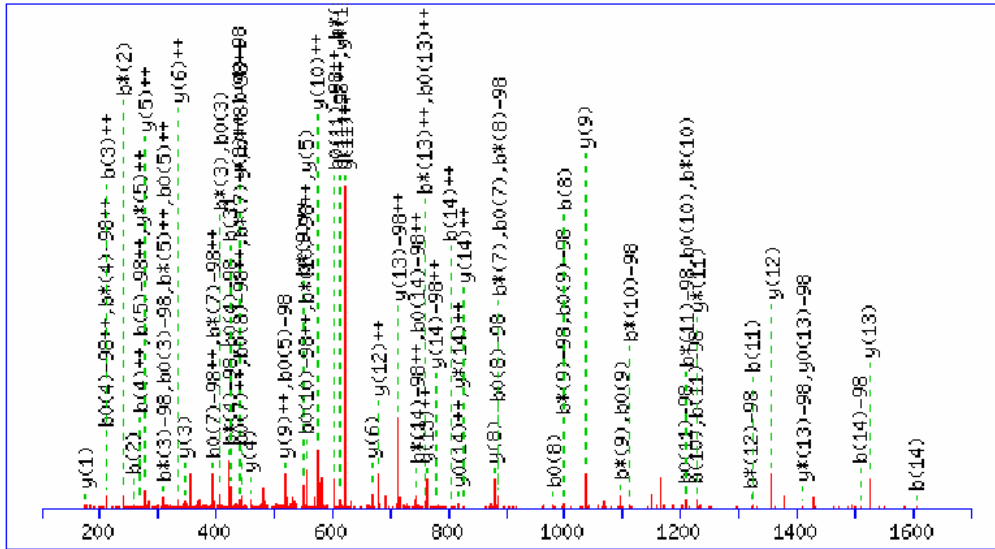

|                        |                                                              |                        |                                                               |                        |                                                               |                        |                                                 |           |                                                 |
|------------------------|--------------------------------------------------------------|------------------------|---------------------------------------------------------------|------------------------|---------------------------------------------------------------|------------------------|-------------------------------------------------|-----------|-------------------------------------------------|
| 88.0631 <sup>+2</sup>  | y <sub>1</sub> <sup>+2</sup>                                 | 451.7640 <sup>+2</sup> | b <sub>8</sub> -H <sub>3</sub> PO <sub>4</sub> <sup>+2</sup>  | 649.3668               | b <sub>6</sub> -H <sub>3</sub> PO <sub>4</sub>                | 826.9842 <sup>+2</sup> | y <sub>14</sub> <sup>+2</sup>                   | 1338.8256 | b <sub>12</sub> -H <sub>3</sub> PO <sub>4</sub> |
| 123.5817 <sup>+2</sup> | y <sub>2</sub> <sup>+2</sup>                                 | 452.2260 <sup>+2</sup> | b <sub>7</sub> <sup>+2</sup>                                  | 662.3629 <sup>+2</sup> | b <sub>11</sub> <sup>+2</sup>                                 | 842.0250 <sup>+2</sup> | MH-H <sub>3</sub> PO <sub>4</sub> <sup>+2</sup> | 1357.9042 | y <sub>12</sub>                                 |
| 173.1159 <sup>+2</sup> | y <sub>3</sub> <sup>+2</sup>                                 | 458.3085               | y <sub>4</sub>                                                | 668.4454               | y <sub>6</sub>                                                | 878.5822               | y <sub>8</sub>                                  | 1426.9257 | y <sub>13</sub> -H <sub>3</sub> PO <sub>4</sub> |
| 175.119                | y <sub>1</sub>                                               | 500.7524 <sup>+2</sup> | b <sub>8</sub> <sup>+2</sup>                                  | 669.9164 <sup>+2</sup> | b <sub>12</sub> -H <sub>3</sub> PO <sub>4</sub> <sup>+2</sup> | 891.0135 <sup>+2</sup> | MH <sup>+2</sup>                                | 1436.8025 | b <sub>12</sub>                                 |
| 229.6579 <sup>+2</sup> | y <sub>4</sub> <sup>+2</sup>                                 | 508.3060 <sup>+2</sup> | b <sub>9</sub> -H <sub>3</sub> PO <sub>4</sub> <sup>+2</sup>  | 679.4557 <sup>+2</sup> | y <sub>12</sub> <sup>+2</sup>                                 | 902.5207               | b <sub>8</sub> -H <sub>3</sub> PO <sub>4</sub>  | 1437.894  | b <sub>13</sub> -H <sub>3</sub> PO <sub>4</sub> |
| 246.1561               | y <sub>2</sub>                                               | 517.8453 <sup>+2</sup> | y <sub>9</sub> <sup>+2</sup>                                  | 713.9665 <sup>+2</sup> | y <sub>13</sub> -H <sub>3</sub> PO <sub>4</sub> <sup>+2</sup> | 903.4448               | b <sub>7</sub>                                  | 1508.9311 | b <sub>14</sub> -H <sub>3</sub> PO <sub>4</sub> |
| 257.1244               | b <sub>2</sub>                                               | 536.2827               | b <sub>5</sub> -H <sub>3</sub> PO <sub>4</sub>                | 718.9049 <sup>+2</sup> | b <sub>12</sub> <sup>+2</sup>                                 | 1000.4976              | b <sub>8</sub>                                  | 1524.9026 | y <sub>13</sub>                                 |
| 278.1843 <sup>+2</sup> | y <sub>5</sub> <sup>+2</sup>                                 | 537.2069               | b <sub>4</sub>                                                | 719.4507 <sup>+2</sup> | b <sub>13</sub> -H <sub>3</sub> PO <sub>4</sub> <sup>+2</sup> | 1015.6047              | b <sub>9</sub> -H <sub>3</sub> PO <sub>4</sub>  | 1535.8709 | b <sub>13</sub>                                 |
| 326.1459               | b <sub>3</sub> -H <sub>3</sub> PO <sub>4</sub>               | 555.3613               | y <sub>5</sub>                                                | 747.3437               | b <sub>6</sub>                                                | 1034.6833              | y <sub>9</sub>                                  | 1554.9842 | y <sub>14</sub> -H <sub>3</sub> PO <sub>4</sub> |
| 334.7263 <sup>+2</sup> | y <sub>6</sub> <sup>+2</sup>                                 | 557.2944 <sup>+2</sup> | b <sub>9</sub> <sup>+2</sup>                                  | 754.9692 <sup>+2</sup> | b <sub>14</sub> -H <sub>3</sub> PO <sub>4</sub> <sup>+2</sup> | 1113.5816              | b <sub>9</sub>                                  | 1606.908  | b <sub>14</sub>                                 |
| 345.2245               | y <sub>3</sub>                                               | 564.8480 <sup>+2</sup> | b <sub>10</sub> -H <sub>3</sub> PO <sub>4</sub> <sup>+2</sup> | 762.9549 <sup>+2</sup> | y <sub>13</sub> <sup>+2</sup>                                 | 1128.6888              | b <sub>10</sub> -H <sub>3</sub> PO <sub>4</sub> | 1652.9611 | y <sub>14</sub>                                 |
| 391.2684 <sup>+2</sup> | y <sub>7</sub> <sup>+2</sup>                                 | 574.3873 <sup>+2</sup> | y <sub>10</sub> <sup>+2</sup>                                 | 768.4391 <sup>+2</sup> | b <sub>13</sub> <sup>+2</sup>                                 | 1147.7674              | y <sub>10</sub>                                 | 1683.0428 | MH-H <sub>3</sub> PO <sub>4</sub>               |
| 403.2376 <sup>+2</sup> | b <sub>7</sub> -H <sub>3</sub> PO <sub>4</sub> <sup>+2</sup> | 613.3744 <sup>+2</sup> | b <sub>11</sub> -H <sub>3</sub> PO <sub>4</sub> <sup>+2</sup> | 777.9958 <sup>+2</sup> | y <sub>14</sub> -H <sub>3</sub> PO <sub>4</sub> <sup>+2</sup> | 1225.7416              | b <sub>11</sub> -H <sub>3</sub> PO <sub>4</sub> | 1781.0197 | MH                                              |
| 424.1228               | b <sub>3</sub>                                               | 613.8365 <sup>+2</sup> | b <sub>10</sub> <sup>+2</sup>                                 | 781.5294               | y <sub>7</sub>                                                | 1226.6657              | b <sub>10</sub>                                 |           |                                                 |
| 439.23                 | b <sub>4</sub> -H <sub>3</sub> PO <sub>4</sub>               | 622.9137 <sup>+2</sup> | y <sub>11</sub> <sup>+2</sup>                                 | 803.9577 <sup>+2</sup> | b <sub>14</sub> <sup>+2</sup>                                 | 1244.8201              | y <sub>11</sub>                                 |           |                                                 |
| 439.7947 <sup>+2</sup> | y <sub>8</sub> <sup>+2</sup>                                 | 634.2596               | b <sub>5</sub>                                                | 805.4679               | b <sub>7</sub> -H <sub>3</sub> PO <sub>4</sub>                | 1323.7184              | b <sub>11</sub>                                 |           |                                                 |

MS/MS Fragmentation of STsPPPSPEVWADSR  
 Found in IPI00216633, Isoform Short of Dematin

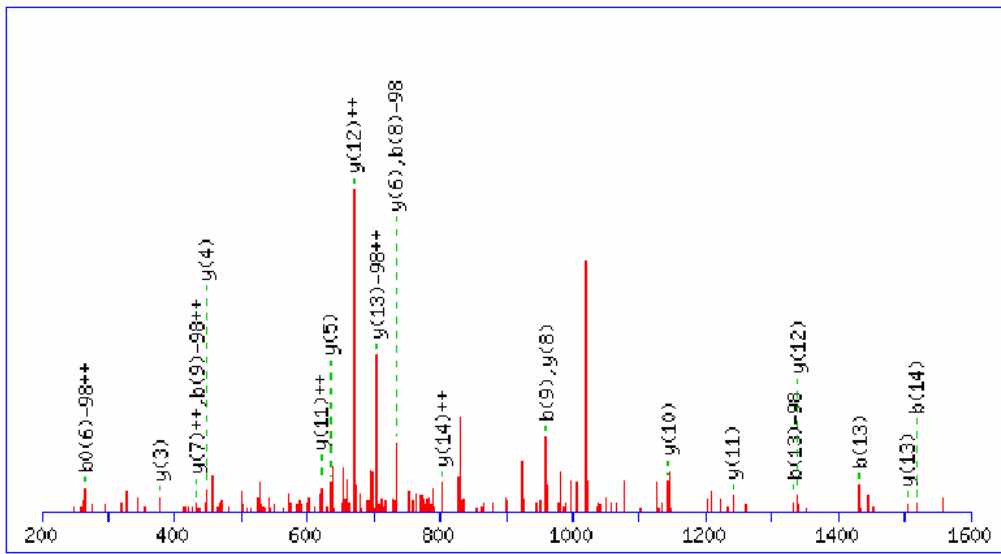

|                        |                                                |                        |                                                |                        |                                                               |           |                                                 |           |                                                 |
|------------------------|------------------------------------------------|------------------------|------------------------------------------------|------------------------|---------------------------------------------------------------|-----------|-------------------------------------------------|-----------|-------------------------------------------------|
| 88.0631 <sup>+2</sup>  | y <sub>1</sub> <sup>+2</sup>                   | 431.7063 <sup>+2</sup> | y <sub>7</sub> <sup>+2</sup>                   | 669.3279 <sup>+2</sup> | y <sub>12</sub> <sup>+2</sup>                                 | 959.4581  | y <sub>8</sub>                                  | 1406.6699 | y <sub>13</sub> -H <sub>3</sub> PO <sub>4</sub> |
| 131.5791 <sup>+2</sup> | y <sub>2</sub> <sup>+2</sup>                   | 448.215                | y <sub>4</sub>                                 | 703.8386 <sup>+2</sup> | y <sub>13</sub> -H <sub>3</sub> PO <sub>4</sub> <sup>+2</sup> | 960.371   | b <sub>9</sub>                                  | 1420.6379 | b <sub>14</sub> -H <sub>3</sub> PO <sub>4</sub> |
| 175.119                | y <sub>1</sub>                                 | 452.214                | b <sub>5</sub> -H <sub>3</sub> PO <sub>4</sub> | 733.3515               | b <sub>8</sub> -H <sub>3</sub> PO <sub>4</sub>                | 961.4625  | b <sub>10</sub> -H <sub>3</sub> PO <sub>4</sub> | 1431.5828 | b <sub>13</sub>                                 |
| 189.087                | b <sub>2</sub>                                 | 453.1381               | b <sub>4</sub>                                 | 733.3628               | y <sub>6</sub>                                                | 1046.4901 | y <sub>9</sub>                                  | 1504.6468 | y <sub>13</sub>                                 |
| 189.0926 <sup>+2</sup> | y <sub>3</sub> <sup>+2</sup>                   | 480.2327 <sup>+2</sup> | y <sub>8</sub> <sup>+2</sup>                   | 734.2757               | b <sub>7</sub>                                                | 1059.4394 | b <sub>10</sub>                                 | 1507.7176 | y <sub>14</sub> -H <sub>3</sub> PO <sub>4</sub> |
| 224.6112 <sup>+2</sup> | y <sub>4</sub> <sup>+2</sup>                   | 523.7487 <sup>+2</sup> | y <sub>9</sub> <sup>+2</sup>                   | 752.8270 <sup>+2</sup> | y <sub>13</sub> <sup>+2</sup>                                 | 1143.5429 | y <sub>10</sub>                                 | 1518.6148 | b <sub>14</sub>                                 |
| 258.1084               | b <sub>3</sub> -H <sub>3</sub> PO <sub>4</sub> | 549.2667               | b <sub>6</sub> -H <sub>3</sub> PO <sub>4</sub> | 754.3624 <sup>+2</sup> | y <sub>14</sub> -H <sub>3</sub> PO <sub>4</sub> <sup>+2</sup> | 1147.5419 | b <sub>11</sub> -H <sub>3</sub> PO <sub>4</sub> | 1594.7496 | MH-H <sub>3</sub> PO <sub>4</sub>               |
| 262.151                | y <sub>2</sub>                                 | 550.1909               | b <sub>5</sub>                                 | 797.8784 <sup>+2</sup> | MH-H <sub>3</sub> PO <sub>4</sub> <sup>+2</sup>               | 1218.579  | b <sub>12</sub> -H <sub>3</sub> PO <sub>4</sub> | 1605.6945 | y <sub>14</sub>                                 |
| 317.6508 <sup>+2</sup> | y <sub>5</sub> <sup>+2</sup>                   | 572.2751 <sup>+2</sup> | y <sub>10</sub> <sup>+2</sup>                  | 803.3509 <sup>+2</sup> | y <sub>14</sub> <sup>+2</sup>                                 | 1240.5957 | y <sub>11</sub>                                 | 1692.7265 | MH                                              |
| 355.1612               | b <sub>4</sub> -H <sub>3</sub> PO <sub>4</sub> | 620.8015 <sup>+2</sup> | y <sub>11</sub> <sup>+2</sup>                  | 831.3284               | b <sub>8</sub>                                                | 1245.5187 | b <sub>11</sub>                                 |           |                                                 |
| 356.0853               | b <sub>3</sub>                                 | 634.2944               | y <sub>5</sub>                                 | 846.8669 <sup>+2</sup> | MH <sup>+2</sup>                                              | 1316.5559 | b <sub>12</sub>                                 |           |                                                 |
| 367.1850 <sup>+2</sup> | y <sub>6</sub> <sup>+2</sup>                   | 636.2988               | b <sub>7</sub> -H <sub>3</sub> PO <sub>4</sub> | 862.3941               | b <sub>9</sub> -H <sub>3</sub> PO <sub>4</sub>                | 1333.6059 | b <sub>13</sub> -H <sub>3</sub> PO <sub>4</sub> |           |                                                 |
| 377.1779               | y <sub>3</sub>                                 | 647.2436               | b <sub>6</sub>                                 | 862.4054               | y <sub>7</sub>                                                | 1337.6484 | y <sub>12</sub>                                 |           |                                                 |

MS/MS Fragmentation of RAAPtTPPPVK  
 Found in IPI00009319, Isoform 1 of SH3 adapter protein SPIN90

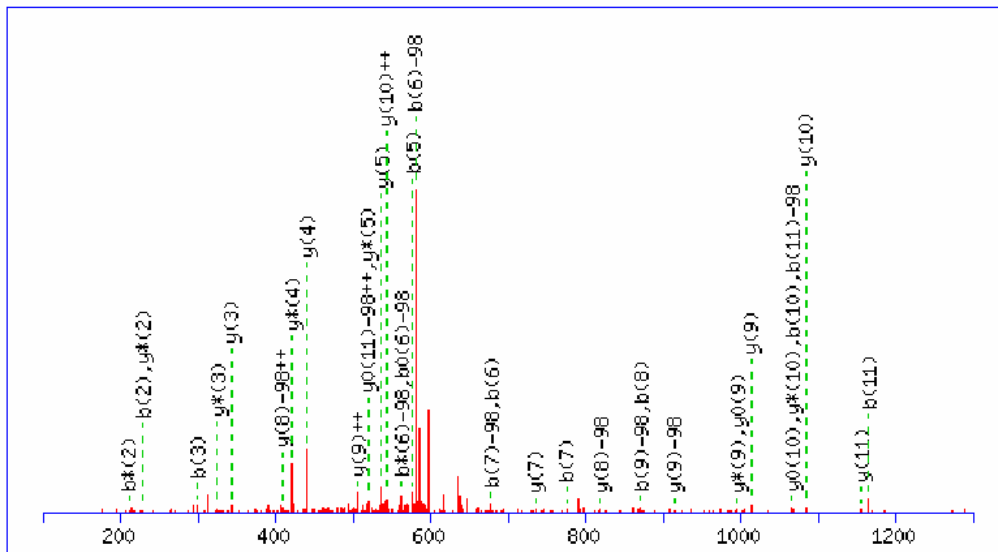

|                        |                                                              |                        |                                                              |                        |                                                               |                        |                                                 |           |                                                 |
|------------------------|--------------------------------------------------------------|------------------------|--------------------------------------------------------------|------------------------|---------------------------------------------------------------|------------------------|-------------------------------------------------|-----------|-------------------------------------------------|
| 74.0600 <sup>+2</sup>  | y <sub>1</sub> <sup>+2</sup>                                 | 299.1826               | b <sub>3</sub>                                               | 458.7306 <sup>+2</sup> | y <sub>8</sub> <sup>+2</sup>                                  | 583.2919 <sup>+2</sup> | b <sub>11</sub> <sup>+2</sup>                   | 968.5312  | b <sub>10</sub> -H <sub>3</sub> PO <sub>4</sub> |
| 114.5764 <sup>+2</sup> | b <sub>2</sub> <sup>+2</sup>                                 | 317.6998 <sup>+2</sup> | y <sub>6</sub> <sup>+2</sup>                                 | 479.2725               | b <sub>5</sub> -H <sub>3</sub> PO <sub>4</sub>                | 607.3562 <sup>+2</sup> | MH-H <sub>3</sub> PO <sub>4</sub> <sup>+2</sup> | 969.4554  | b <sub>9</sub>                                  |
| 123.5942 <sup>+2</sup> | y <sub>2</sub> <sup>+2</sup>                                 | 339.1901 <sup>+2</sup> | b <sub>7</sub> -H <sub>3</sub> PO <sub>4</sub> <sup>+2</sup> | 484.7693 <sup>+2</sup> | b <sub>10</sub> -H <sub>3</sub> PO <sub>4</sub> <sup>+2</sup> | 634.3923               | y <sub>6</sub>                                  | 986.5669  | y <sub>10</sub> -H <sub>3</sub> PO <sub>4</sub> |
| 147.1128               | y <sub>1</sub>                                               | 339.6522 <sup>+2</sup> | b <sub>6</sub> <sup>+2</sup>                                 | 485.2313 <sup>+2</sup> | b <sub>9</sub> <sup>+2</sup>                                  | 656.3447 <sup>+2</sup> | MH <sup>+2</sup>                                | 1013.5067 | y <sub>9</sub>                                  |
| 150.0949 <sup>+2</sup> | b <sub>3</sub> <sup>+2</sup>                                 | 343.234                | y <sub>3</sub>                                               | 493.7871 <sup>+2</sup> | y <sub>10</sub> -H <sub>3</sub> PO <sub>4</sub> <sup>+2</sup> | 677.3729               | b <sub>7</sub> -H <sub>3</sub> PO <sub>4</sub>  | 1057.6041 | y <sub>11</sub> -H <sub>3</sub> PO <sub>4</sub> |
| 172.1206 <sup>+2</sup> | y <sub>3</sub> <sup>+2</sup>                                 | 368.2236 <sup>+2</sup> | y <sub>7</sub> <sup>+2</sup>                                 | 507.2570 <sup>+2</sup> | y <sub>9</sub> <sup>+2</sup>                                  | 678.2971               | b <sub>6</sub>                                  | 1066.5081 | b <sub>10</sub>                                 |
| 198.6213 <sup>+2</sup> | b <sub>4</sub> <sup>+2</sup>                                 | 387.7165 <sup>+2</sup> | b <sub>8</sub> -H <sub>3</sub> PO <sub>4</sub> <sup>+2</sup> | 529.3057 <sup>+2</sup> | y <sub>11</sub> -H <sub>3</sub> PO <sub>4</sub> <sup>+2</sup> | 735.44                 | y <sub>7</sub>                                  | 1067.5996 | b <sub>11</sub> -H <sub>3</sub> PO <sub>4</sub> |
| 220.6470 <sup>+2</sup> | y <sub>4</sub> <sup>+2</sup>                                 | 388.1786 <sup>+2</sup> | b <sub>7</sub> <sup>+2</sup>                                 | 533.7577 <sup>+2</sup> | b <sub>10</sub> <sup>+2</sup>                                 | 774.4257               | b <sub>8</sub> -H <sub>3</sub> PO <sub>4</sub>  | 1084.5438 | y <sub>10</sub>                                 |
| 228.1455               | b <sub>2</sub>                                               | 396.2354               | b <sub>4</sub>                                               | 534.3035 <sup>+2</sup> | b <sub>11</sub> -H <sub>3</sub> PO <sub>4</sub> <sup>+2</sup> | 775.3498               | b <sub>7</sub>                                  | 1155.581  | y <sub>11</sub>                                 |
| 240.1399 <sup>+2</sup> | b <sub>5</sub> -H <sub>3</sub> PO <sub>4</sub> <sup>+2</sup> | 409.7422 <sup>+2</sup> | y <sub>8</sub> -H <sub>3</sub> PO <sub>4</sub> <sup>+2</sup> | 537.3395               | y <sub>5</sub>                                                | 818.4771               | y <sub>8</sub> -H <sub>3</sub> PO <sub>4</sub>  | 1165.5765 | b <sub>11</sub>                                 |
| 246.1812               | y <sub>2</sub>                                               | 436.2429 <sup>+2</sup> | b <sub>9</sub> -H <sub>3</sub> PO <sub>4</sub> <sup>+2</sup> | 542.7756 <sup>+2</sup> | y <sub>10</sub> <sup>+2</sup>                                 | 871.4785               | b <sub>9</sub> -H <sub>3</sub> PO <sub>4</sub>  | 1213.7052 | MH-H <sub>3</sub> PO <sub>4</sub>               |
| 269.1734 <sup>+2</sup> | y <sub>5</sub> <sup>+2</sup>                                 | 436.7049 <sup>+2</sup> | b <sub>8</sub> <sup>+2</sup>                                 | 577.2494               | b <sub>5</sub>                                                | 872.4026               | b <sub>8</sub>                                  | 1311.6821 | MH                                              |
| 289.1283 <sup>+2</sup> | b <sub>5</sub> <sup>+2</sup>                                 | 440.2867               | y <sub>4</sub>                                               | 578.2941 <sup>+2</sup> | y <sub>11</sub> <sup>+2</sup>                                 | 915.5298               | y <sub>9</sub> -H <sub>3</sub> PO <sub>4</sub>  |           |                                                 |
| 290.6637 <sup>+2</sup> | b <sub>6</sub> -H <sub>3</sub> PO <sub>4</sub> <sup>+2</sup> | 458.2686 <sup>+2</sup> | y <sub>9</sub> -H <sub>3</sub> PO <sub>4</sub> <sup>+2</sup> | 580.3202               | b <sub>6</sub> -H <sub>3</sub> PO <sub>4</sub>                | 916.454                | y <sub>8</sub>                                  |           |                                                 |

MS/MS Fragmentation of IHRAsDPGLPAECPK  
 Found in IPI00301263, CAD protein

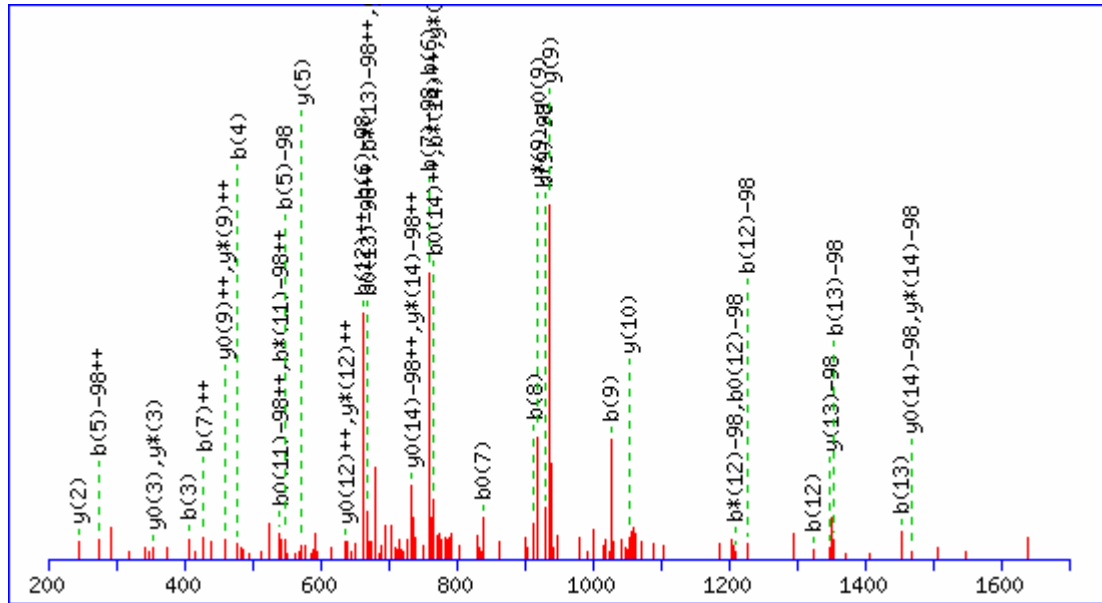

|                        |                                                              |                        |                                                               |                        |                                                               |                        |                                                 |           |                                                 |
|------------------------|--------------------------------------------------------------|------------------------|---------------------------------------------------------------|------------------------|---------------------------------------------------------------|------------------------|-------------------------------------------------|-----------|-------------------------------------------------|
| 74.0600 <sup>+2</sup>  | y <sub>1</sub> <sup>+2</sup>                                 | 392.2160 <sup>+2</sup> | y <sub>7</sub> <sup>+2</sup>                                  | 596.7959 <sup>+2</sup> | y <sub>12</sub> -H <sub>3</sub> PO <sub>4</sub> <sup>+2</sup> | 783.4247               | y <sub>7</sub>                                  | 1219.5242 | y <sub>11</sub>                                 |
| 122.5864 <sup>+2</sup> | y <sub>2</sub> <sup>+2</sup>                                 | 407.2514               | b <sub>3</sub>                                                | 598.2846 <sup>+2</sup> | b <sub>11</sub> <sup>+2</sup>                                 | 792.3643 <sup>+2</sup> | y <sub>14</sub> <sup>+2</sup>                   | 1226.6276 | b <sub>12</sub> -H <sub>3</sub> PO <sub>4</sub> |
| 126.0788 <sup>+2</sup> | b <sub>2</sub> <sup>+2</sup>                                 | 408.7092 <sup>+2</sup> | b <sub>8</sub> -H <sub>3</sub> PO <sub>4</sub> <sup>+2</sup>  | 610.2658 <sup>+2</sup> | y <sub>11</sub> <sup>+2</sup>                                 | 799.9179 <sup>+2</sup> | MH-H <sub>3</sub> PO <sub>4</sub> <sup>+2</sup> | 1290.5613 | y <sub>12</sub>                                 |
| 147.1128               | y <sub>1</sub>                                               | 420.7267 <sup>+2</sup> | y <sub>8</sub> <sup>+2</sup>                                  | 613.8175 <sup>+2</sup> | b <sub>12</sub> -H <sub>3</sub> PO <sub>4</sub> <sup>+2</sup> | 816.4111               | b <sub>8</sub> -H <sub>3</sub> PO <sub>4</sub>  | 1324.6045 | b <sub>12</sub>                                 |
| 187.1077 <sup>+2</sup> | y <sub>3</sub> <sup>+2</sup>                                 | 429.1869 <sup>+2</sup> | b <sub>7</sub> <sup>+2</sup>                                  | 645.2868               | b <sub>5</sub>                                                | 840.4462               | y <sub>8</sub>                                  | 1348.6856 | y <sub>13</sub> -H <sub>3</sub> PO <sub>4</sub> |
| 204.1293 <sup>+2</sup> | b <sub>3</sub> <sup>+2</sup>                                 | 457.6976 <sup>+2</sup> | b <sub>8</sub> <sup>+2</sup>                                  | 645.7843 <sup>+2</sup> | y <sub>12</sub> <sup>+2</sup>                                 | 848.9064 <sup>+2</sup> | MH <sup>+2</sup>                                | 1355.6702 | b <sub>13</sub> -H <sub>3</sub> PO <sub>4</sub> |
| 239.6479 <sup>+2</sup> | b <sub>4</sub> <sup>+2</sup>                                 | 465.2512 <sup>+2</sup> | b <sub>9</sub> -H <sub>3</sub> PO <sub>4</sub> <sup>+2</sup>  | 662.3369               | b <sub>6</sub> -H <sub>3</sub> PO <sub>4</sub>                | 857.3665               | b <sub>7</sub>                                  | 1446.6625 | y <sub>13</sub>                                 |
| 244.1656               | y <sub>2</sub>                                               | 469.2531 <sup>+2</sup> | y <sub>9</sub> <sup>+2</sup>                                  | 662.8059 <sup>+2</sup> | b <sub>12</sub> <sup>+2</sup>                                 | 914.388                | b <sub>8</sub>                                  | 1452.723  | b <sub>14</sub> -H <sub>3</sub> PO <sub>4</sub> |
| 251.1503               | b <sub>2</sub>                                               | 478.2885               | b <sub>4</sub>                                                | 670.3406               | y <sub>6</sub>                                                | 929.4952               | b <sub>9</sub> -H <sub>3</sub> PO <sub>4</sub>  | 1453.6471 | b <sub>13</sub>                                 |
| 251.6290 <sup>+2</sup> | y <sub>4</sub> <sup>+2</sup>                                 | 502.2508               | y <sub>4</sub>                                                | 674.8464 <sup>+2</sup> | y <sub>13</sub> -H <sub>3</sub> PO <sub>4</sub> <sup>+2</sup> | 937.4989               | y <sub>9</sub>                                  | 1485.7445 | y <sub>14</sub> -H <sub>3</sub> PO <sub>4</sub> |
| 274.1586 <sup>+2</sup> | b <sub>5</sub> -H <sub>3</sub> PO <sub>4</sub> <sup>+2</sup> | 513.7776 <sup>+2</sup> | b <sub>10</sub> -H <sub>3</sub> PO <sub>4</sub> <sup>+2</sup> | 678.3388 <sup>+2</sup> | b <sub>13</sub> -H <sub>3</sub> PO <sub>4</sub> <sup>+2</sup> | 1026.5479              | b <sub>10</sub> -H <sub>3</sub> PO <sub>4</sub> | 1550.6999 | b <sub>14</sub>                                 |
| 287.1476 <sup>+2</sup> | y <sub>5</sub> <sup>+2</sup>                                 | 514.2397 <sup>+2</sup> | b <sub>9</sub> <sup>+2</sup>                                  | 723.8349 <sup>+2</sup> | y <sub>13</sub> <sup>+2</sup>                                 | 1027.4721              | b <sub>9</sub>                                  | 1583.7214 | y <sub>14</sub>                                 |
| 323.1471 <sup>+2</sup> | b <sub>5</sub> <sup>+2</sup>                                 | 526.7666 <sup>+2</sup> | y <sub>10</sub> <sup>+2</sup>                                 | 726.8651 <sup>+2</sup> | b <sub>14</sub> -H <sub>3</sub> PO <sub>4</sub> <sup>+2</sup> | 1052.5259              | y <sub>10</sub>                                 | 1598.8285 | MH-H <sub>3</sub> PO <sub>4</sub>               |
| 331.6721 <sup>+2</sup> | b <sub>6</sub> -H <sub>3</sub> PO <sub>4</sub> <sup>+2</sup> | 547.3099               | b <sub>5</sub> -H <sub>3</sub> PO <sub>4</sub>                | 727.3272 <sup>+2</sup> | b <sub>13</sub> <sup>+2</sup>                                 | 1097.5851              | b <sub>11</sub> -H <sub>3</sub> PO <sub>4</sub> | 1696.8054 | MH                                              |
| 335.6740 <sup>+2</sup> | y <sub>6</sub> <sup>+2</sup>                                 | 549.2962 <sup>+2</sup> | b <sub>11</sub> -H <sub>3</sub> PO <sub>4</sub> <sup>+2</sup> | 743.3759 <sup>+2</sup> | y <sub>14</sub> -H <sub>3</sub> PO <sub>4</sub> <sup>+2</sup> | 1121.5473              | y <sub>11</sub> -H <sub>3</sub> PO <sub>4</sub> |           |                                                 |
| 373.2082               | y <sub>3</sub>                                               | 561.2773 <sup>+2</sup> | y <sub>11</sub> -H <sub>3</sub> PO <sub>4</sub> <sup>+2</sup> | 759.3896               | b <sub>7</sub> -H <sub>3</sub> PO <sub>4</sub>                | 1124.5248              | b <sub>10</sub>                                 |           |                                                 |
| 380.1985 <sup>+2</sup> | b <sub>7</sub> -H <sub>3</sub> PO <sub>4</sub> <sup>+2</sup> | 562.7661 <sup>+2</sup> | b <sub>10</sub> <sup>+2</sup>                                 | 760.3138               | b <sub>6</sub>                                                | 1192.5844              | y <sub>12</sub> -H <sub>3</sub> PO <sub>4</sub> |           |                                                 |
| 380.6605 <sup>+2</sup> | b <sub>6</sub> <sup>+2</sup>                                 | 573.2879               | y <sub>5</sub>                                                | 775.8536 <sup>+2</sup> | b <sub>14</sub> <sup>+2</sup>                                 | 1195.5619              | b <sub>11</sub>                                 |           |                                                 |

MS/MS Fragmentation of IHRAsDPGLPAEEPKEK  
 Found in IPI00301263, CAD protein

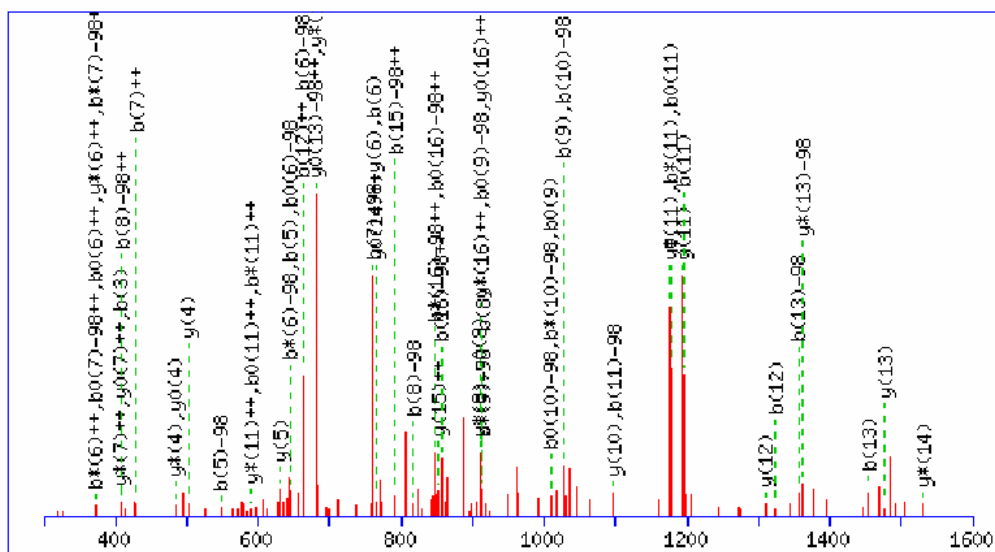

|                        |                                                              |                        |                                                               |                        |                                                               |                        |                                                               |           |                                                 |
|------------------------|--------------------------------------------------------------|------------------------|---------------------------------------------------------------|------------------------|---------------------------------------------------------------|------------------------|---------------------------------------------------------------|-----------|-------------------------------------------------|
| 74.0600 <sup>+2</sup>  | y <sub>1</sub> <sup>+2</sup>                                 | 415.7164 <sup>+2</sup> | y <sub>7</sub> <sup>+2</sup>                                  | 662.3369               | b <sub>6</sub> -H <sub>3</sub> PO <sub>4</sub>                | 857.3665               | b <sub>7</sub>                                                | 1355.6702 | b <sub>13</sub> -H <sub>3</sub> PO <sub>4</sub> |
| 126.0788 <sup>+2</sup> | b <sub>2</sub> <sup>+2</sup>                                 | 429.1869 <sup>+2</sup> | b <sub>7</sub> <sup>+2</sup>                                  | 662.8059 <sup>+2</sup> | b <sub>12</sub> <sup>+2</sup>                                 | 871.9446 <sup>+2</sup> | y <sub>16</sub> -H <sub>3</sub> PO <sub>4</sub> <sup>+2</sup> | 1378.6849 | y <sub>13</sub> -H <sub>3</sub> PO <sub>4</sub> |
| 138.5813 <sup>+2</sup> | y <sub>2</sub> <sup>+2</sup>                                 | 457.6976 <sup>+2</sup> | b <sub>8</sub> <sup>+2</sup>                                  | 678.3388 <sup>+2</sup> | b <sub>13</sub> -H <sub>3</sub> PO <sub>4</sub> <sup>+2</sup> | 904.4224 <sup>+2</sup> | b <sub>16</sub> <sup>+2</sup>                                 | 1449.722  | y <sub>14</sub> -H <sub>3</sub> PO <sub>4</sub> |
| 147.1128               | y <sub>1</sub>                                               | 464.2427 <sup>+2</sup> | y <sub>8</sub> <sup>+2</sup>                                  | 689.8461 <sup>+2</sup> | y <sub>13</sub> -H <sub>3</sub> PO <sub>4</sub> <sup>+2</sup> | 914.388                | b <sub>8</sub>                                                | 1452.723  | b <sub>14</sub> -H <sub>3</sub> PO <sub>4</sub> |
| 202.6288 <sup>+2</sup> | y <sub>3</sub> <sup>+2</sup>                                 | 465.2512 <sup>+2</sup> | b <sub>9</sub> -H <sub>3</sub> PO <sub>4</sub> <sup>+2</sup>  | 725.3646 <sup>+2</sup> | y <sub>14</sub> -H <sub>3</sub> PO <sub>4</sub> <sup>+2</sup> | 920.9331 <sup>+2</sup> | y <sub>16</sub> <sup>+2</sup>                                 | 1453.6471 | b <sub>13</sub>                                 |
| 204.1293 <sup>+2</sup> | b <sub>3</sub> <sup>+2</sup>                                 | 478.2885               | b <sub>4</sub>                                                | 726.8651 <sup>+2</sup> | b <sub>14</sub> -H <sub>3</sub> PO <sub>4</sub> <sup>+2</sup> | 927.4782               | y <sub>8</sub>                                                | 1476.6618 | y <sub>13</sub>                                 |
| 239.6479 <sup>+2</sup> | b <sub>4</sub> <sup>+2</sup>                                 | 501.3031               | y <sub>4</sub>                                                | 727.3272 <sup>+2</sup> | b <sub>13</sub> <sup>+2</sup>                                 | 928.4867 <sup>+2</sup> | MH-H <sub>3</sub> PO <sub>4</sub> <sup>+2</sup>               | 1547.6989 | y <sub>14</sub>                                 |
| 251.1503               | b <sub>2</sub>                                               | 513.7776 <sup>+2</sup> | b <sub>10</sub> -H <sub>3</sub> PO <sub>4</sub> <sup>+2</sup> | 738.8345 <sup>+2</sup> | y <sub>13</sub> <sup>+2</sup>                                 | 929.4952               | b <sub>9</sub> -H <sub>3</sub> PO <sub>4</sub>                | 1550.6999 | b <sub>14</sub>                                 |
| 251.1552 <sup>+2</sup> | y <sub>4</sub> <sup>+2</sup>                                 | 514.2397 <sup>+2</sup> | b <sub>9</sub> <sup>+2</sup>                                  | 759.3883               | y <sub>6</sub>                                                | 977.4751 <sup>+2</sup> | MH <sup>+2</sup>                                              | 1580.818  | b <sub>15</sub> -H <sub>3</sub> PO <sub>4</sub> |
| 274.1586 <sup>+2</sup> | b <sub>5</sub> -H <sub>3</sub> PO <sub>4</sub> <sup>+2</sup> | 520.7848 <sup>+2</sup> | y <sub>9</sub> <sup>+2</sup>                                  | 759.3896               | b <sub>7</sub> -H <sub>3</sub> PO <sub>4</sub>                | 1026.5479              | b <sub>10</sub> -H <sub>3</sub> PO <sub>4</sub>               | 1605.8231 | y <sub>15</sub> -H <sub>3</sub> PO <sub>4</sub> |
| 276.1554               | y <sub>2</sub>                                               | 547.3099               | b <sub>5</sub> -H <sub>3</sub> PO <sub>4</sub>                | 760.3138               | b <sub>6</sub>                                                | 1027.4721              | b <sub>9</sub>                                                | 1678.7949 | b <sub>15</sub>                                 |
| 315.6765 <sup>+2</sup> | y <sub>5</sub> <sup>+2</sup>                                 | 549.2955 <sup>+2</sup> | y <sub>10</sub> <sup>+2</sup>                                 | 774.3531 <sup>+2</sup> | y <sub>14</sub> <sup>+2</sup>                                 | 1040.5623              | y <sub>9</sub>                                                | 1703.8    | y <sub>15</sub>                                 |
| 323.1471 <sup>+2</sup> | b <sub>5</sub> <sup>+2</sup>                                 | 549.2962 <sup>+2</sup> | b <sub>11</sub> -H <sub>3</sub> PO <sub>4</sub> <sup>+2</sup> | 775.8536 <sup>+2</sup> | b <sub>14</sub> <sup>+2</sup>                                 | 1097.5837              | y <sub>10</sub>                                               | 1709.8606 | b <sub>16</sub> -H <sub>3</sub> PO <sub>4</sub> |
| 331.6721 <sup>+2</sup> | b <sub>6</sub> -H <sub>3</sub> PO <sub>4</sub> <sup>+2</sup> | 562.7661 <sup>+2</sup> | b <sub>10</sub> <sup>+2</sup>                                 | 790.9126 <sup>+2</sup> | b <sub>15</sub> -H <sub>3</sub> PO <sub>4</sub> <sup>+2</sup> | 1097.5851              | b <sub>11</sub> -H <sub>3</sub> PO <sub>4</sub>               | 1742.882  | y <sub>16</sub> -H <sub>3</sub> PO <sub>4</sub> |
| 380.1978 <sup>+2</sup> | y <sub>6</sub> <sup>+2</sup>                                 | 597.8219 <sup>+2</sup> | y <sub>11</sub> <sup>+2</sup>                                 | 803.4152 <sup>+2</sup> | y <sub>15</sub> -H <sub>3</sub> PO <sub>4</sub> <sup>+2</sup> | 1124.5248              | b <sub>10</sub>                                               | 1807.8375 | b <sub>16</sub>                                 |
| 380.1985 <sup>+2</sup> | b <sub>7</sub> -H <sub>3</sub> PO <sub>4</sub> <sup>+2</sup> | 598.2846 <sup>+2</sup> | b <sub>11</sub> <sup>+2</sup>                                 | 816.4111               | b <sub>8</sub> -H <sub>3</sub> PO <sub>4</sub>                | 1194.6365              | y <sub>11</sub>                                               | 1840.8589 | y <sub>16</sub>                                 |
| 380.6605 <sup>+2</sup> | b <sub>6</sub> <sup>+2</sup>                                 | 613.8175 <sup>+2</sup> | b <sub>12</sub> -H <sub>3</sub> PO <sub>4</sub> <sup>+2</sup> | 830.4254               | y <sub>7</sub>                                                | 1195.5619              | b <sub>11</sub>                                               | 1855.9661 | MH-H <sub>3</sub> PO <sub>4</sub>               |
| 404.2504               | y <sub>3</sub>                                               | 630.3457               | y <sub>5</sub>                                                | 839.9011 <sup>+2</sup> | b <sub>15</sub> <sup>+2</sup>                                 | 1226.6276              | b <sub>12</sub> -H <sub>3</sub> PO <sub>4</sub>               | 1953.943  | MH                                              |
| 407.2514               | b <sub>3</sub>                                               | 645.2868               | b <sub>5</sub>                                                | 852.4036 <sup>+2</sup> | y <sub>15</sub> <sup>+2</sup>                                 | 1309.6634              | y <sub>12</sub>                                               |           |                                                 |
| 408.7092 <sup>+2</sup> | b <sub>8</sub> -H <sub>3</sub> PO <sub>4</sub> <sup>+2</sup> | 655.3353 <sup>+2</sup> | y <sub>12</sub> <sup>+2</sup>                                 | 855.4339 <sup>+2</sup> | b <sub>16</sub> -H <sub>3</sub> PO <sub>4</sub> <sup>+2</sup> | 1324.6045              | b <sub>12</sub>                                               |           |                                                 |



MS/MS Fragmentation of VTNDIsPEsSPGVGR  
 Found in IPI00006213, Pericentriol material 1

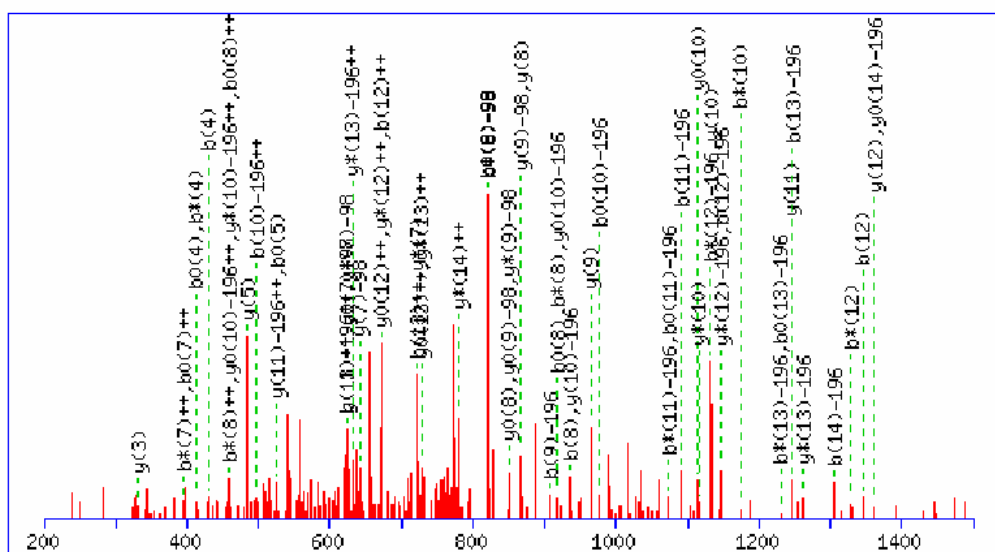

|                        |                                                              |                        |                                                                |                        |                                                               |           |                                                  |           |                                                  |
|------------------------|--------------------------------------------------------------|------------------------|----------------------------------------------------------------|------------------------|---------------------------------------------------------------|-----------|--------------------------------------------------|-----------|--------------------------------------------------|
| 88.0631 <sup>+2</sup>  | y <sub>1</sub> <sup>+2</sup>                                 | 468.7303 <sup>+2</sup> | y <sub>10</sub> -2H <sub>3</sub> PO <sub>4</sub> <sup>+2</sup> | 709.3515               | b <sub>7</sub> -H <sub>3</sub> PO <sub>4</sub>                | 1005.3925 | b <sub>9</sub> -H <sub>3</sub> PO <sub>4</sub>   | 1304.6117 | b <sub>14</sub> -2H <sub>3</sub> PO <sub>4</sub> |
| 116.5738 <sup>+2</sup> | y <sub>2</sub> <sup>+2</sup>                                 | 483.2080 <sup>+2</sup> | y <sub>9</sub> <sup>+2</sup>                                   | 710.2757               | b <sub>6</sub>                                                | 1034.4303 | y <sub>10</sub> -H <sub>3</sub> PO <sub>4</sub>  | 1344.4756 | b <sub>12</sub>                                  |
| 166.1081 <sup>+2</sup> | y <sub>3</sub> <sup>+2</sup>                                 | 485.2831               | y <sub>5</sub>                                                 | 737.7842 <sup>+2</sup> | y <sub>13</sub> <sup>+2</sup>                                 | 1049.5374 | y <sub>11</sub> -2H <sub>3</sub> PO <sub>4</sub> | 1345.5672 | b <sub>13</sub> -H <sub>3</sub> PO <sub>4</sub>  |
| 175.119                | y <sub>1</sub>                                               | 517.7188 <sup>+2</sup> | y <sub>10</sub> -H <sub>3</sub> PO <sub>4</sub> <sup>+2</sup>  | 739.3134               | y <sub>7</sub>                                                | 1091.5004 | b <sub>11</sub> -2H <sub>3</sub> PO <sub>4</sub> | 1360.5182 | y <sub>12</sub>                                  |
| 194.6188 <sup>+2</sup> | y <sub>4</sub> <sup>+2</sup>                                 | 525.2724 <sup>+2</sup> | y <sub>11</sub> -2H <sub>3</sub> PO <sub>4</sub> <sup>+2</sup> | 739.3196 <sup>+2</sup> | y <sub>14</sub> -H <sub>3</sub> PO <sub>4</sub> <sup>+2</sup> | 1092.4245 | b <sub>10</sub> -H <sub>3</sub> PO <sub>4</sub>  | 1376.5842 | y <sub>13</sub> -H <sub>3</sub> PO <sub>4</sub>  |
| 201.1234               | b <sub>2</sub>                                               | 543.2773               | b <sub>5</sub>                                                 | 770.3791               | y <sub>8</sub> -H <sub>3</sub> PO <sub>4</sub>                | 1103.3694 | b <sub>9</sub>                                   | 1379.655  | y <sub>14</sub> -2H <sub>3</sub> PO <sub>4</sub> |
| 232.1404               | y <sub>2</sub>                                               | 566.7072 <sup>+2</sup> | y <sub>10</sub> <sup>+2</sup>                                  | 788.3080 <sup>+2</sup> | y <sub>14</sub> <sup>+2</sup>                                 | 1132.4072 | y <sub>10</sub>                                  | 1402.5886 | b <sub>14</sub> -H <sub>3</sub> PO <sub>4</sub>  |
| 243.1452 <sup>+2</sup> | y <sub>5</sub> <sup>+2</sup>                                 | 572.3151               | y <sub>6</sub>                                                 | 788.8538 <sup>+2</sup> | MH-H <sub>3</sub> PO <sub>4</sub> <sup>+2</sup>               | 1147.5143 | y <sub>11</sub> -H <sub>3</sub> PO <sub>4</sub>  | 1443.544  | b <sub>13</sub>                                  |
| 286.6612 <sup>+2</sup> | y <sub>6</sub> <sup>+2</sup>                                 | 574.2608 <sup>+2</sup> | y <sub>11</sub> -H <sub>3</sub> PO <sub>4</sub> <sup>+2</sup>  | 807.3284               | b <sub>7</sub>                                                | 1148.5218 | b <sub>12</sub> -2H <sub>3</sub> PO <sub>4</sub> | 1474.5611 | y <sub>13</sub>                                  |
| 315.1663               | b <sub>3</sub>                                               | 582.7858 <sup>+2</sup> | y <sub>12</sub> -2H <sub>3</sub> PO <sub>4</sub> <sup>+2</sup> | 837.8422 <sup>+2</sup> | MH <sup>+2</sup>                                              | 1164.5644 | y <sub>12</sub> -2H <sub>3</sub> PO <sub>4</sub> | 1477.6319 | y <sub>14</sub> -H <sub>3</sub> PO <sub>4</sub>  |
| 321.1719 <sup>+2</sup> | y <sub>7</sub> -H <sub>3</sub> PO <sub>4</sub> <sup>+2</sup> | 612.2988               | b <sub>6</sub> -H <sub>3</sub> PO <sub>4</sub>                 | 838.3941               | b <sub>8</sub> -H <sub>3</sub> PO <sub>4</sub>                | 1189.4773 | b <sub>11</sub> -H <sub>3</sub> PO <sub>4</sub>  | 1500.5655 | b <sub>14</sub>                                  |
| 331.2088               | y <sub>3</sub>                                               | 623.2493 <sup>+2</sup> | y <sub>11</sub> <sup>+2</sup>                                  | 867.4319               | y <sub>9</sub> -H <sub>3</sub> PO <sub>4</sub>                | 1190.4014 | b <sub>10</sub>                                  | 1575.6088 | y <sub>14</sub>                                  |
| 370.1604 <sup>+2</sup> | y <sub>7</sub> <sup>+2</sup>                                 | 631.7743 <sup>+2</sup> | y <sub>12</sub> -H <sub>3</sub> PO <sub>4</sub> <sup>+2</sup>  | 868.356                | y <sub>8</sub>                                                | 1245.4912 | y <sub>11</sub>                                  | 1576.7003 | MH-H <sub>3</sub> PO <sub>4</sub>                |
| 385.6932 <sup>+2</sup> | y <sub>8</sub> -H <sub>3</sub> PO <sub>4</sub> <sup>+2</sup> | 639.8073 <sup>+2</sup> | y <sub>13</sub> -2H <sub>3</sub> PO <sub>4</sub> <sup>+2</sup> | 907.4156               | b <sub>9</sub> -2H <sub>3</sub> PO <sub>4</sub>               | 1246.4987 | b <sub>12</sub> -H <sub>3</sub> PO <sub>4</sub>  | 1674.6772 | MH                                               |
| 388.2303               | y <sub>4</sub>                                               | 641.3365               | y <sub>7</sub> -H <sub>3</sub> PO <sub>4</sub>                 | 936.371                | b <sub>8</sub>                                                | 1247.5903 | b <sub>13</sub> -2H <sub>3</sub> PO <sub>4</sub> |           |                                                  |
| 430.1932               | b <sub>4</sub>                                               | 680.7627 <sup>+2</sup> | y <sub>12</sub> <sup>+2</sup>                                  | 936.4534               | y <sub>10</sub> -2H <sub>3</sub> PO <sub>4</sub>              | 1262.5413 | y <sub>12</sub> -H <sub>3</sub> PO <sub>4</sub>  |           |                                                  |
| 434.2196 <sup>+2</sup> | y <sub>9</sub> -H <sub>3</sub> PO <sub>4</sub> <sup>+2</sup> | 688.7957 <sup>+2</sup> | y <sub>13</sub> -H <sub>3</sub> PO <sub>4</sub> <sup>+2</sup>  | 965.4088               | y <sub>9</sub>                                                | 1278.6073 | y <sub>13</sub> -2H <sub>3</sub> PO <sub>4</sub> |           |                                                  |
| 434.6817 <sup>+2</sup> | y <sub>8</sub> <sup>+2</sup>                                 | 690.3311 <sup>+2</sup> | y <sub>14</sub> -2H <sub>3</sub> PO <sub>4</sub> <sup>+2</sup> | 994.4476               | b <sub>10</sub> -2H <sub>3</sub> PO <sub>4</sub>              | 1287.4542 | b <sub>11</sub>                                  |           |                                                  |

MS/MS Fragmentation of YmSQmsVPEQAELEK  
 Found in IPI00006213, Pericentriol material 1

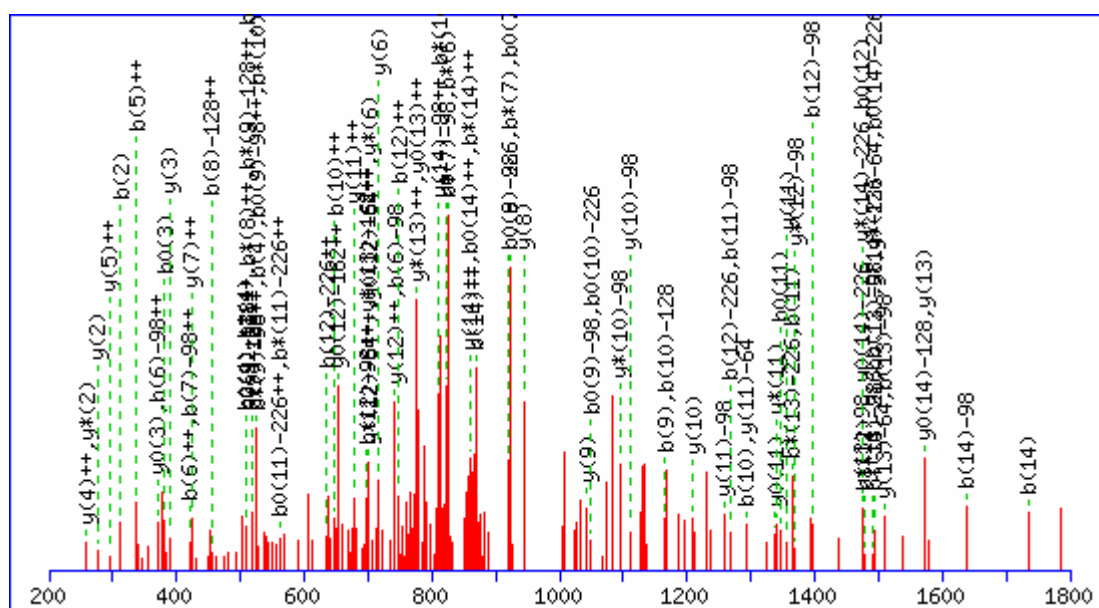

|                        |                              |                        |                                                               |                        |                                                               |           |                                                 |           |                                                 |
|------------------------|------------------------------|------------------------|---------------------------------------------------------------|------------------------|---------------------------------------------------------------|-----------|-------------------------------------------------|-----------|-------------------------------------------------|
| 74.0600 <sup>+2</sup>  | y <sub>1</sub> <sup>+2</sup> | 518.2821               | y <sub>4</sub>                                                | 742.8206 <sup>+2</sup> | y <sub>12</sub> <sup>+2</sup>                                 | 1042.5415 | y <sub>9</sub>                                  | 1473.689  | y <sub>13</sub> -H <sub>3</sub> PO <sub>4</sub> |
| 138.5813 <sup>+2</sup> | y <sub>2</sub> <sup>+2</sup> | 521.7744 <sup>+2</sup> | y <sub>9</sub> <sup>+2</sup>                                  | 786.3366 <sup>+2</sup> | y <sub>13</sub> <sup>+2</sup>                                 | 1067.4172 | b <sub>9</sub> -H <sub>3</sub> PO <sub>4</sub>  | 1484.6339 | y <sub>12</sub>                                 |
| 147.1128               | y <sub>1</sub>               | 526.1966               | b <sub>4</sub>                                                | 810.8658 <sup>+2</sup> | y <sub>14</sub> -H <sub>3</sub> PO <sub>4</sub> <sup>+2</sup> | 1111.563  | y <sub>10</sub> -H <sub>3</sub> PO <sub>4</sub> | 1493.5324 | b <sub>12</sub>                                 |
| 195.1234 <sup>+2</sup> | y <sub>3</sub> <sup>+2</sup> | 556.2851 <sup>+2</sup> | y <sub>10</sub> -H <sub>3</sub> PO <sub>4</sub> <sup>+2</sup> | 840.2304               | b <sub>6</sub>                                                | 1165.3941 | b <sub>9</sub>                                  | 1508.6396 | b <sub>13</sub> -H <sub>3</sub> PO <sub>4</sub> |
| 259.6447 <sup>+2</sup> | y <sub>4</sub> <sup>+2</sup> | 589.3192               | y <sub>5</sub>                                                | 841.3219               | b <sub>7</sub> -H <sub>3</sub> PO <sub>4</sub>                | 1195.4758 | b <sub>10</sub> -H <sub>3</sub> PO <sub>4</sub> | 1571.6659 | y <sub>13</sub>                                 |
| 276.1554               | y <sub>2</sub>               | 605.2736 <sup>+2</sup> | y <sub>10</sub> <sup>+2</sup>                                 | 846.4203               | y <sub>7</sub>                                                | 1209.5399 | y <sub>10</sub>                                 | 1606.6165 | b <sub>13</sub>                                 |
| 295.1632 <sup>+2</sup> | y <sub>5</sub> <sup>+2</sup> | 629.8028 <sup>+2</sup> | y <sub>11</sub> -H <sub>3</sub> PO <sub>4</sub> <sup>+2</sup> | 859.8543 <sup>+2</sup> | y <sub>14</sub> <sup>+2</sup>                                 | 1258.5984 | y <sub>11</sub> -H <sub>3</sub> PO <sub>4</sub> | 1620.7244 | y <sub>14</sub> -H <sub>3</sub> PO <sub>4</sub> |
| 311.106                | b <sub>2</sub>               | 673.232                | b <sub>5</sub>                                                | 892.3975 <sup>+2</sup> | MH-H <sub>3</sub> PO <sub>4</sub> <sup>+2</sup>               | 1266.5129 | b <sub>11</sub> -H <sub>3</sub> PO <sub>4</sub> | 1637.6822 | b <sub>14</sub> -H <sub>3</sub> PO <sub>4</sub> |
| 359.1925 <sup>+2</sup> | y <sub>6</sub> <sup>+2</sup> | 678.7913 <sup>+2</sup> | y <sub>11</sub> <sup>+2</sup>                                 | 938.3747               | b <sub>8</sub> -H <sub>3</sub> PO <sub>4</sub>                | 1293.4527 | b <sub>10</sub>                                 | 1718.7013 | y <sub>14</sub>                                 |
| 389.2395               | y <sub>3</sub>               | 693.8321 <sup>+2</sup> | y <sub>12</sub> -H <sub>3</sub> PO <sub>4</sub> <sup>+2</sup> | 939.2988               | b <sub>7</sub>                                                | 1356.5753 | y <sub>11</sub>                                 | 1735.6591 | b <sub>14</sub>                                 |
| 398.138                | b <sub>3</sub>               | 717.3777               | y <sub>6</sub>                                                | 941.3859 <sup>+2</sup> | MH <sup>+2</sup>                                              | 1364.4898 | b <sub>11</sub>                                 | 1783.7877 | MH-H <sub>3</sub> PO <sub>4</sub>               |
| 423.7138 <sup>+2</sup> | y <sub>7</sub> <sup>+2</sup> | 737.3481 <sup>+2</sup> | y <sub>13</sub> -H <sub>3</sub> PO <sub>4</sub> <sup>+2</sup> | 943.4731               | y <sub>8</sub>                                                | 1386.657  | y <sub>12</sub> -H <sub>3</sub> PO <sub>4</sub> | 1881.7646 | MH                                              |
| 472.2402 <sup>+2</sup> | y <sub>8</sub> <sup>+2</sup> | 742.2535               | b <sub>6</sub> -H <sub>3</sub> PO <sub>4</sub>                | 1036.3515              | b <sub>8</sub>                                                | 1395.5555 | b <sub>12</sub> -H <sub>3</sub> PO <sub>4</sub> |           |                                                 |

MS/MS Fragmentation of QHEAPSNRPLNELLTPQGPpR  
 Found in IPI00020578, ARAF protein

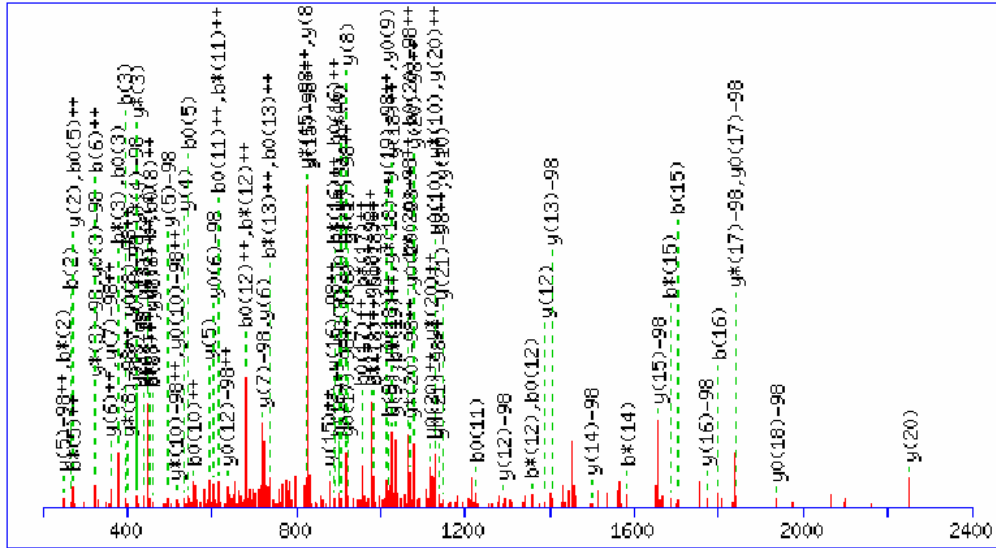

|                        |                                                              |                        |                                                               |                         |                                                               |                         |                                                               |           |                                                 |
|------------------------|--------------------------------------------------------------|------------------------|---------------------------------------------------------------|-------------------------|---------------------------------------------------------------|-------------------------|---------------------------------------------------------------|-----------|-------------------------------------------------|
| 88.0631 <sup>+2</sup>  | y <sub>1</sub> <sup>+2</sup>                                 | 460.2053 <sup>+2</sup> | y <sub>8</sub> <sup>+2</sup>                                  | 751.3742 <sup>+2</sup>  | y <sub>13</sub> <sup>+2</sup>                                 | 1062.5335 <sup>+2</sup> | y <sub>19</sub> <sup>+2</sup>                                 | 1700.8715 | b <sub>15</sub>                                 |
| 133.5660 <sup>+2</sup> | b <sub>2</sub> <sup>+2</sup>                                 | 460.7203 <sup>+2</sup> | b <sub>8</sub> <sup>+2</sup>                                  | 764.3322                | b <sub>7</sub>                                                | 1075.0429 <sup>+2</sup> | b <sub>20</sub> -H <sub>3</sub> PO <sub>4</sub> <sup>+2</sup> | 1754.8949 | y <sub>15</sub>                                 |
| 136.5895 <sup>+2</sup> | y <sub>2</sub> <sup>+2</sup>                                 | 466.2045               | b <sub>4</sub>                                                | 799.9005 <sup>+2</sup>  | y <sub>14</sub> <sup>+2</sup>                                 | 1078.0664 <sup>+2</sup> | y <sub>20</sub> -H <sub>3</sub> PO <sub>4</sub> <sup>+2</sup> | 1770.9609 | y <sub>16</sub> -H <sub>3</sub> PO <sub>4</sub> |
| 171.1002 <sup>+2</sup> | y <sub>3</sub> -H <sub>3</sub> PO <sub>4</sub> <sup>+2</sup> | 467.7589 <sup>+2</sup> | y <sub>9</sub> -H <sub>3</sub> PO <sub>4</sub> <sup>+2</sup>  | 800.4155 <sup>+2</sup>  | b <sub>14</sub> <sup>+2</sup>                                 | 1123.5693 <sup>+2</sup> | b <sub>21</sub> -H <sub>3</sub> PO <sub>4</sub> <sup>+2</sup> | 1797.9242 | b <sub>16</sub>                                 |
| 175.119                | y <sub>1</sub>                                               | 495.2674               | y <sub>5</sub> -H <sub>3</sub> PO <sub>4</sub>                | 818.3556                | y <sub>7</sub>                                                | 1124.0313 <sup>+2</sup> | b <sub>20</sub> <sup>+2</sup>                                 | 1857.993  | y <sub>17</sub> -H <sub>3</sub> PO <sub>4</sub> |
| 198.0873 <sup>+2</sup> | b <sub>3</sub> <sup>+2</sup>                                 | 509.2467 <sup>+2</sup> | b <sub>9</sub> <sup>+2</sup>                                  | 821.4264                | y <sub>8</sub> -H <sub>3</sub> PO <sub>4</sub>                | 1127.0548 <sup>+2</sup> | y <sub>20</sub> <sup>+2</sup>                                 | 1868.9378 | y <sub>16</sub>                                 |
| 219.6266 <sup>+2</sup> | y <sub>4</sub> -H <sub>3</sub> PO <sub>4</sub> <sup>+2</sup> | 516.7473 <sup>+2</sup> | y <sub>9</sub> <sup>+2</sup>                                  | 828.9626 <sup>+2</sup>  | y <sub>15</sub> -H <sub>3</sub> PO <sub>4</sub> <sup>+2</sup> | 1130.5701               | b <sub>10</sub>                                               | 1925.9828 | b <sub>17</sub>                                 |
| 220.0887 <sup>+2</sup> | y <sub>3</sub> <sup>+2</sup>                                 | 524.3009 <sup>+2</sup> | y <sub>10</sub> -H <sub>3</sub> PO <sub>4</sub> <sup>+2</sup> | 850.9394 <sup>+2</sup>  | b <sub>15</sub> <sup>+2</sup>                                 | 1145.5715               | y <sub>10</sub>                                               | 1955.0457 | y <sub>18</sub> -H <sub>3</sub> PO <sub>4</sub> |
| 233.6059 <sup>+2</sup> | b <sub>4</sub> <sup>+2</sup>                                 | 536.2228               | y <sub>4</sub>                                                | 877.9511 <sup>+2</sup>  | y <sub>15</sub> <sup>+2</sup>                                 | 1146.5958 <sup>+2</sup> | y <sub>21</sub> -H <sub>3</sub> PO <sub>4</sub> <sup>+2</sup> | 1955.9699 | y <sub>17</sub>                                 |
| 248.1373 <sup>+2</sup> | y <sub>5</sub> -H <sub>3</sub> PO <sub>4</sub> <sup>+2</sup> | 563.2572               | b <sub>5</sub>                                                | 885.9841 <sup>+2</sup>  | y <sub>16</sub> -H <sub>3</sub> PO <sub>4</sub> <sup>+2</sup> | 1172.5577 <sup>+2</sup> | b <sub>21</sub> <sup>+2</sup>                                 | 1983.0043 | b <sub>18</sub>                                 |
| 266.1248               | b <sub>2</sub>                                               | 565.7887 <sup>+2</sup> | b <sub>10</sub> <sup>+2</sup>                                 | 899.4657 <sup>+2</sup>  | b <sub>16</sub> <sup>+2</sup>                                 | 1176.6371               | y <sub>11</sub> -H <sub>3</sub> PO <sub>4</sub>               | 2026.0828 | y <sub>19</sub> -H <sub>3</sub> PO <sub>4</sub> |
| 268.6151 <sup>+2</sup> | y <sub>4</sub> <sup>+2</sup>                                 | 573.2894 <sup>+2</sup> | y <sub>10</sub> <sup>+2</sup>                                 | 919.4033                | y <sub>8</sub>                                                | 1195.5843 <sup>+2</sup> | y <sub>21</sub> <sup>+2</sup>                                 | 2053.0226 | y <sub>18</sub>                                 |
| 272.1717               | y <sub>2</sub>                                               | 588.8222 <sup>+2</sup> | y <sub>11</sub> -H <sub>3</sub> PO <sub>4</sub> <sup>+2</sup> | 920.4333                | b <sub>8</sub>                                                | 1210.6251 <sup>+2</sup> | MH-H <sub>3</sub> PO <sub>4</sub> <sup>+2</sup>               | 2080.057  | b <sub>19</sub>                                 |
| 282.1323 <sup>+2</sup> | b <sub>5</sub> <sup>+2</sup>                                 | 593.2443               | y <sub>5</sub>                                                | 929.5001 <sup>+2</sup>  | y <sub>17</sub> -H <sub>3</sub> PO <sub>4</sub> <sup>+2</sup> | 1244.6131               | b <sub>11</sub>                                               | 2124.0597 | y <sub>19</sub>                                 |
| 297.1258 <sup>+2</sup> | y <sub>5</sub> <sup>+2</sup>                                 | 622.8102 <sup>+2</sup> | b <sub>11</sub> <sup>+2</sup>                                 | 934.5105                | y <sub>9</sub> -H <sub>3</sub> PO <sub>4</sub>                | 1259.6136 <sup>+2</sup> | MH <sup>+2</sup>                                              | 2149.0785 | b <sub>20</sub> -H <sub>3</sub> PO <sub>4</sub> |
| 312.1666 <sup>+2</sup> | y <sub>6</sub> -H <sub>3</sub> PO <sub>4</sub> <sup>+2</sup> | 623.326                | y <sub>6</sub> -H <sub>3</sub> PO <sub>4</sub>                | 934.9726 <sup>+2</sup>  | y <sub>16</sub> <sup>+2</sup>                                 | 1274.614                | y <sub>11</sub>                                               | 2155.1254 | y <sub>20</sub> -H <sub>3</sub> PO <sub>4</sub> |
| 325.6483 <sup>+2</sup> | b <sub>6</sub> <sup>+2</sup>                                 | 637.8107 <sup>+2</sup> | y <sub>11</sub> <sup>+2</sup>                                 | 963.4950 <sup>+2</sup>  | b <sub>17</sub> <sup>+2</sup>                                 | 1290.6801               | y <sub>12</sub> -H <sub>3</sub> PO <sub>4</sub>               | 2246.1313 | b <sub>21</sub> -H <sub>3</sub> PO <sub>4</sub> |
| 341.1932               | y <sub>3</sub> -H <sub>3</sub> PO <sub>4</sub>               | 645.8437 <sup>+2</sup> | y <sub>12</sub> -H <sub>3</sub> PO <sub>4</sub> <sup>+2</sup> | 978.0265 <sup>+2</sup>  | y <sub>18</sub> -H <sub>3</sub> PO <sub>4</sub> <sup>+2</sup> | 1373.6557               | b <sub>12</sub>                                               | 2247.0554 | b <sub>20</sub>                                 |
| 360.6930 <sup>+2</sup> | y <sub>7</sub> -H <sub>3</sub> PO <sub>4</sub> <sup>+2</sup> | 650.2893               | b <sub>6</sub>                                                | 978.4886 <sup>+2</sup>  | y <sub>17</sub> <sup>+2</sup>                                 | 1388.657                | y <sub>12</sub>                                               | 2253.1023 | y <sub>20</sub>                                 |
| 361.1551 <sup>+2</sup> | y <sub>6</sub> <sup>+2</sup>                                 | 687.3315 <sup>+2</sup> | b <sub>12</sub> <sup>+2</sup>                                 | 992.0058 <sup>+2</sup>  | b <sub>18</sub> <sup>+2</sup>                                 | 1403.7641               | y <sub>13</sub> -H <sub>3</sub> PO <sub>4</sub>               | 2292.1844 | y <sub>21</sub> -H <sub>3</sub> PO <sub>4</sub> |
| 382.6697 <sup>+2</sup> | b <sub>7</sub> <sup>+2</sup>                                 | 694.8321 <sup>+2</sup> | y <sub>12</sub> <sup>+2</sup>                                 | 1013.5451 <sup>+2</sup> | y <sub>19</sub> -H <sub>3</sub> PO <sub>4</sub> <sup>+2</sup> | 1486.7397               | b <sub>13</sub>                                               | 2344.1081 | b <sub>21</sub>                                 |
| 395.1674               | b <sub>3</sub>                                               | 702.3857 <sup>+2</sup> | y <sub>13</sub> -H <sub>3</sub> PO <sub>4</sub> <sup>+2</sup> | 1017.4861               | b <sub>9</sub>                                                | 1500.8169               | y <sub>14</sub> -H <sub>3</sub> PO <sub>4</sub>               | 2390.1612 | y <sub>21</sub>                                 |
| 409.6815 <sup>+2</sup> | y <sub>7</sub> <sup>+2</sup>                                 | 720.3787               | y <sub>7</sub> -H <sub>3</sub> PO <sub>4</sub>                | 1027.0150 <sup>+2</sup> | y <sub>18</sub> <sup>+2</sup>                                 | 1501.741                | y <sub>13</sub>                                               | 2420.2429 | MH-H <sub>3</sub> PO <sub>4</sub>               |
| 411.2169 <sup>+2</sup> | y <sub>8</sub> -H <sub>3</sub> PO <sub>4</sub> <sup>+2</sup> | 721.3029               | y <sub>6</sub>                                                | 1032.4874               | y <sub>9</sub>                                                | 1598.7938               | y <sub>14</sub>                                               | 2518.2198 | MH                                              |
| 438.2459               | y <sub>4</sub> -H <sub>3</sub> PO <sub>4</sub>               | 743.8735 <sup>+2</sup> | b <sub>13</sub> <sup>+2</sup>                                 | 1040.5322 <sup>+2</sup> | b <sub>19</sub> <sup>+2</sup>                                 | 1599.8238               | b <sub>14</sub>                                               |           |                                                 |
| 439.1701               | y <sub>3</sub>                                               | 750.9121 <sup>+2</sup> | y <sub>14</sub> -H <sub>3</sub> PO <sub>4</sub> <sup>+2</sup> | 1047.5946               | y <sub>10</sub> -H <sub>3</sub> PO <sub>4</sub>               | 1656.918                | y <sub>15</sub> -H <sub>3</sub> PO <sub>4</sub>               |           |                                                 |

MS/MS Fragmentation of QPEtAAALAsSGSVVSSVPKAQR  
 Found in IPI00216664, Isoform 6 of CKLF-like MARVEL  
 transmembrane domain-containing protein 1

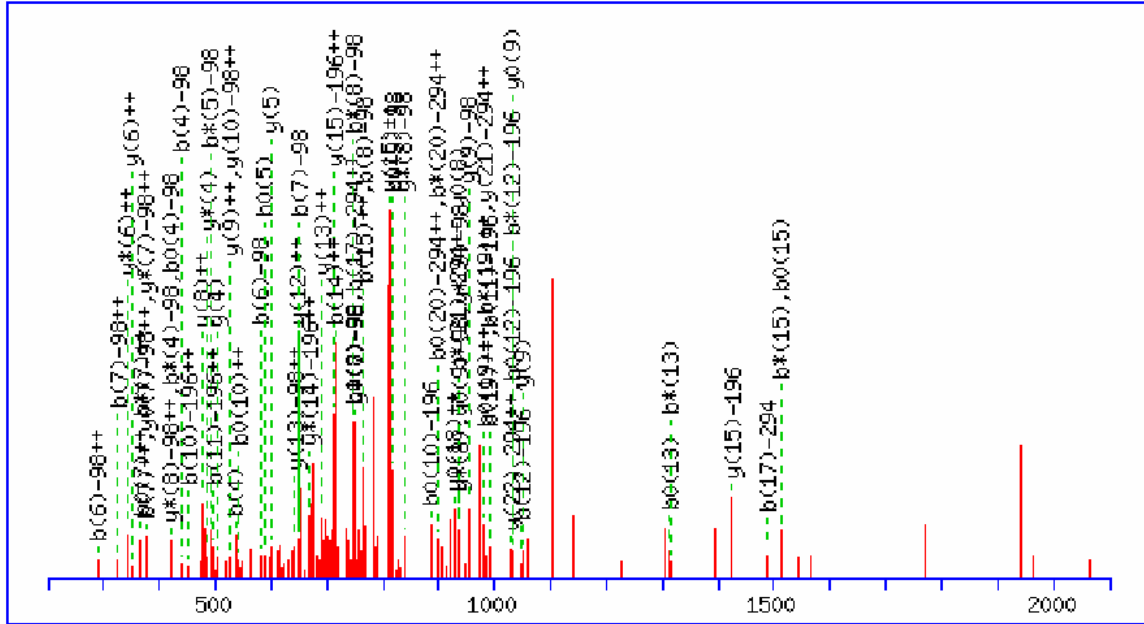

|                        |                                                                |                        |                                                                |                         |                                                                |                         |                                                  |           |                                                  |
|------------------------|----------------------------------------------------------------|------------------------|----------------------------------------------------------------|-------------------------|----------------------------------------------------------------|-------------------------|--------------------------------------------------|-----------|--------------------------------------------------|
| 88.0631 <sup>+2</sup>  | y <sub>1</sub> <sup>+2</sup>                                   | 698.4308               | y <sub>6</sub>                                                 | 991.4843                | b <sub>11</sub> -2H <sub>3</sub> PO <sub>4</sub>               | 1241.0448 <sup>+2</sup> | MH <sup>+2</sup>                                 | 1783.8262 | b <sub>19</sub> -2H <sub>3</sub> PO <sub>4</sub> |
| 152.0924 <sup>+2</sup> | y <sub>2</sub> <sup>+2</sup>                                   | 712.3862 <sup>+2</sup> | y <sub>15</sub> -2H <sub>3</sub> PO <sub>4</sub> <sup>+2</sup> | 991.9828 <sup>+2</sup>  | b <sub>21</sub> -2H <sub>3</sub> PO <sub>4</sub> <sup>+2</sup> | 1244.4596               | b <sub>12</sub>                                  | 1784.7504 | b <sub>18</sub> -H <sub>3</sub> PO <sub>4</sub>  |
| 175.119                | y <sub>1</sub>                                                 | 725.8561 <sup>+2</sup> | y <sub>14</sub> -H <sub>3</sub> PO <sub>4</sub> <sup>+2</sup>  | 1002.4292               | b <sub>10</sub> -H <sub>3</sub> PO <sub>4</sub>                | 1283.7066               | y <sub>13</sub> -H <sub>3</sub> PO <sub>4</sub>  | 1803.8402 | y <sub>17</sub>                                  |
| 187.6110 <sup>+2</sup> | y <sub>3</sub> <sup>+2</sup>                                   | 749.2866               | b <sub>7</sub>                                                 | 1005.4527 <sup>+2</sup> | b <sub>20</sub> -H <sub>3</sub> PO <sub>4</sub> <sup>+2</sup>  | 1294.6515               | y <sub>12</sub>                                  | 1813.9443 | b <sub>20</sub> -3H <sub>3</sub> PO <sub>4</sub> |
| 226.1186               | b <sub>2</sub>                                                 | 761.3747 <sup>+2</sup> | y <sub>15</sub> -H <sub>3</sub> PO <sub>4</sub> <sup>+2</sup>  | 1007.0236 <sup>+2</sup> | b <sub>22</sub> -3H <sub>3</sub> PO <sub>4</sub> <sup>+2</sup> | 1331.4916               | b <sub>13</sub>                                  | 1832.9977 | y <sub>20</sub> -3H <sub>3</sub> PO <sub>4</sub> |
| 251.6584 <sup>+2</sup> | y <sub>4</sub> <sup>+2</sup>                                   | 764.3937               | b <sub>8</sub> -H <sub>3</sub> PO <sub>4</sub>                 | 1014.9794 <sup>+2</sup> | y <sub>20</sub> -H <sub>3</sub> PO <sub>4</sub> <sup>+2</sup>  | 1332.5831               | b <sub>14</sub> -H <sub>3</sub> PO <sub>4</sub>  | 1847.9375 | y <sub>19</sub> -H <sub>3</sub> PO <sub>4</sub>  |
| 300.1848 <sup>+2</sup> | y <sub>5</sub> <sup>+2</sup>                                   | 767.4522               | y <sub>7</sub> -H <sub>3</sub> PO <sub>4</sub>                 | 1030.0502 <sup>+2</sup> | y <sub>22</sub> -3H <sub>3</sub> PO <sub>4</sub> <sup>+2</sup> | 1333.6747               | b <sub>15</sub> -2H <sub>3</sub> PO <sub>4</sub> | 1874.8773 | y <sub>18</sub>                                  |
| 303.1775               | y <sub>2</sub>                                                 | 768.9283 <sup>+2</sup> | y <sub>16</sub> -2H <sub>3</sub> PO <sub>4</sub> <sup>+2</sup> | 1030.5122 <sup>+2</sup> | y <sub>21</sub> -2H <sub>3</sub> PO <sub>4</sub> <sup>+2</sup> | 1352.7281               | y <sub>14</sub> -2H <sub>3</sub> PO <sub>4</sub> | 1881.8031 | b <sub>19</sub> -H <sub>3</sub> PO <sub>4</sub>  |
| 349.7190 <sup>+2</sup> | y <sub>6</sub> <sup>+2</sup>                                   | 774.8446 <sup>+2</sup> | y <sub>14</sub> <sup>+2</sup>                                  | 1040.9712 <sup>+2</sup> | b <sub>21</sub> -H <sub>3</sub> PO <sub>4</sub> <sup>+2</sup>  | 1381.6835               | y <sub>13</sub>                                  | 1882.7272 | b <sub>18</sub>                                  |
| 355.1612               | b <sub>3</sub>                                                 | 804.4468 <sup>+2</sup> | y <sub>17</sub> -2H <sub>3</sub> PO <sub>4</sub> <sup>+2</sup> | 1048.5058               | b <sub>12</sub> -2H <sub>3</sub> PO <sub>4</sub>               | 1420.7067               | b <sub>16</sub> -2H <sub>3</sub> PO <sub>4</sub> | 1884.9814 | b <sub>21</sub> -3H <sub>3</sub> PO <sub>4</sub> |
| 374.2146               | y <sub>3</sub>                                                 | 810.3631 <sup>+2</sup> | y <sub>15</sub> <sup>+2</sup>                                  | 1051.5296               | y <sub>9</sub>                                                 | 1423.7652               | y <sub>15</sub> -2H <sub>3</sub> PO <sub>4</sub> | 1911.9212 | b <sub>20</sub> -2H <sub>3</sub> PO <sub>4</sub> |
| 384.2298 <sup>+2</sup> | y <sub>7</sub> -H <sub>3</sub> PO <sub>4</sub> <sup>+2</sup>   | 817.9167 <sup>+2</sup> | y <sub>16</sub> -H <sub>3</sub> PO <sub>4</sub> <sup>+2</sup>  | 1052.6211               | y <sub>10</sub> -H <sub>3</sub> PO <sub>4</sub>                | 1430.56                 | b <sub>14</sub>                                  | 1930.9746 | y <sub>20</sub> -2H <sub>3</sub> PO <sub>4</sub> |
| 427.7458 <sup>+2</sup> | y <sub>8</sub> -H <sub>3</sub> PO <sub>4</sub> <sup>+2</sup>   | 835.4308               | b <sub>9</sub> -H <sub>3</sub> PO <sub>4</sub>                 | 1054.4411 <sup>+2</sup> | b <sub>20</sub> <sup>+2</sup>                                  | 1431.6516               | b <sub>15</sub> -H <sub>3</sub> PO <sub>4</sub>  | 1945.9144 | y <sub>19</sub>                                  |
| 433.2182 <sup>+2</sup> | y <sub>7</sub> <sup>+2</sup>                                   | 839.9654 <sup>+2</sup> | y <sub>18</sub> -2H <sub>3</sub> PO <sub>4</sub> <sup>+2</sup> | 1056.0121 <sup>+2</sup> | b <sub>22</sub> -2H <sub>3</sub> PO <sub>4</sub> <sup>+2</sup> | 1450.705                | y <sub>14</sub> -H <sub>3</sub> PO <sub>4</sub>  | 1962.0403 | y <sub>21</sub> -3H <sub>3</sub> PO <sub>4</sub> |
| 438.1983               | b <sub>4</sub> -H <sub>3</sub> PO <sub>4</sub>                 | 853.4353 <sup>+2</sup> | y <sub>17</sub> -H <sub>3</sub> PO <sub>4</sub> <sup>+2</sup>  | 1063.9678 <sup>+2</sup> | y <sub>20</sub> <sup>+2</sup>                                  | 1489.7281               | b <sub>17</sub> -3H <sub>3</sub> PO <sub>4</sub> | 1979.78   | b <sub>19</sub>                                  |
| 476.7342 <sup>+2</sup> | y <sub>8</sub> <sup>+2</sup>                                   | 854.4843               | y <sub>8</sub> -H <sub>3</sub> PO <sub>4</sub>                 | 1079.0386 <sup>+2</sup> | y <sub>22</sub> -2H <sub>3</sub> PO <sub>4</sub> <sup>+2</sup> | 1518.6836               | b <sub>16</sub> -H <sub>3</sub> PO <sub>4</sub>  | 1982.9583 | b <sub>21</sub> -2H <sub>3</sub> PO <sub>4</sub> |
| 477.2800 <sup>+2</sup> | y <sub>9</sub> -H <sub>3</sub> PO <sub>4</sub> <sup>+2</sup>   | 862.3706               | b <sub>8</sub>                                                 | 1079.5007 <sup>+2</sup> | y <sub>21</sub> -H <sub>3</sub> PO <sub>4</sub> <sup>+2</sup>  | 1521.7421               | y <sub>15</sub> -H <sub>3</sub> PO <sub>4</sub>  | 2009.8981 | b <sub>20</sub> -H <sub>3</sub> PO <sub>4</sub>  |
| 502.3096               | y <sub>4</sub>                                                 | 865.4291               | y <sub>7</sub>                                                 | 1089.4612               | b <sub>11</sub> -H <sub>3</sub> PO <sub>4</sub>                | 1529.6284               | b <sub>15</sub>                                  | 2013.04   | b <sub>22</sub> -3H <sub>3</sub> PO <sub>4</sub> |
| 509.2354               | b <sub>5</sub> -H <sub>3</sub> PO <sub>4</sub>                 | 866.9052 <sup>+2</sup> | y <sub>16</sub> <sup>+2</sup>                                  | 1089.9597 <sup>+2</sup> | b <sub>21</sub> <sup>+2</sup>                                  | 1536.8493               | y <sub>16</sub> -2H <sub>3</sub> PO <sub>4</sub> | 2028.9515 | y <sub>20</sub> -H <sub>3</sub> PO <sub>4</sub>  |
| 526.2684 <sup>+2</sup> | y <sub>9</sub> <sup>+2</sup>                                   | 875.4839 <sup>+2</sup> | y <sub>19</sub> -2H <sub>3</sub> PO <sub>4</sub> <sup>+2</sup> | 1100.4061               | b <sub>10</sub>                                                | 1548.6819               | y <sub>14</sub>                                  | 2059.0931 | y <sub>22</sub> -3H <sub>3</sub> PO <sub>4</sub> |
| 526.8142 <sup>+2</sup> | y <sub>10</sub> -H <sub>3</sub> PO <sub>4</sub> <sup>+2</sup>  | 888.9538 <sup>+2</sup> | y <sub>18</sub> -H <sub>3</sub> PO <sub>4</sub> <sup>+2</sup>  | 1105.0005 <sup>+2</sup> | b <sub>22</sub> -H <sub>3</sub> PO <sub>4</sub> <sup>+2</sup>  | 1587.705                | b <sub>17</sub> -2H <sub>3</sub> PO <sub>4</sub> | 2060.0172 | y <sub>21</sub> -2H <sub>3</sub> PO <sub>4</sub> |
| 536.1752               | b <sub>4</sub>                                                 | 902.4237 <sup>+2</sup> | y <sub>17</sub> <sup>+2</sup>                                  | 1128.0271 <sup>+2</sup> | y <sub>22</sub> -H <sub>3</sub> PO <sub>4</sub> <sup>+2</sup>  | 1588.7966               | b <sub>18</sub> -3H <sub>3</sub> PO <sub>4</sub> | 2080.9352 | b <sub>21</sub> -H <sub>3</sub> PO <sub>4</sub>  |
| 570.3302 <sup>+2</sup> | y <sub>11</sub> -H <sub>3</sub> PO <sub>4</sub> <sup>+2</sup>  | 904.4523               | b <sub>10</sub> -2H <sub>3</sub> PO <sub>4</sub>               | 1128.4891 <sup>+2</sup> | y <sub>21</sub> <sup>+2</sup>                                  | 1607.8864               | y <sub>17</sub> -2H <sub>3</sub> PO <sub>4</sub> | 2107.875  | b <sub>20</sub>                                  |
| 575.8026 <sup>+2</sup> | y <sub>10</sub> <sup>+2</sup>                                  | 907.4758 <sup>+2</sup> | b <sub>20</sub> -3H <sub>3</sub> PO <sub>4</sub> <sup>+2</sup> | 1135.5378               | b <sub>13</sub> -2H <sub>3</sub> PO <sub>4</sub>               | 1616.6605               | b <sub>16</sub>                                  | 2111.0169 | b <sub>22</sub> -2H <sub>3</sub> PO <sub>4</sub> |
| 580.2726               | b <sub>6</sub> -H <sub>3</sub> PO <sub>4</sub>                 | 917.0025 <sup>+2</sup> | y <sub>20</sub> -3H <sub>3</sub> PO <sub>4</sub> <sup>+2</sup> | 1139.6531               | y <sub>11</sub> -H <sub>3</sub> PO <sub>4</sub>                | 1619.719                | y <sub>15</sub>                                  | 2126.9284 | y <sub>20</sub>                                  |
| 598.8409 <sup>+2</sup> | y <sub>12</sub> -H <sub>3</sub> PO <sub>4</sub> <sup>+2</sup>  | 924.4724 <sup>+2</sup> | y <sub>19</sub> -H <sub>3</sub> PO <sub>4</sub> <sup>+2</sup>  | 1146.4827               | b <sub>12</sub> -H <sub>3</sub> PO <sub>4</sub>                | 1634.8262               | y <sub>16</sub> -H <sub>3</sub> PO <sub>4</sub>  | 2157.07   | y <sub>22</sub> -2H <sub>3</sub> PO <sub>4</sub> |
| 599.3624               | y <sub>5</sub>                                                 | 933.4077               | b <sub>9</sub>                                                 | 1150.598                | y <sub>10</sub>                                                | 1678.9235               | y <sub>18</sub> -2H <sub>3</sub> PO <sub>4</sub> | 2157.9941 | y <sub>21</sub> -H <sub>3</sub> PO <sub>4</sub>  |
| 607.2123               | b <sub>5</sub>                                                 | 937.9423 <sup>+2</sup> | y <sub>18</sub> <sup>+2</sup>                                  | 1153.9890 <sup>+2</sup> | b <sub>22</sub> <sup>+2</sup>                                  | 1685.6819               | b <sub>17</sub> -H <sub>3</sub> PO <sub>4</sub>  | 2178.9121 | b <sub>21</sub>                                  |
| 619.3187 <sup>+2</sup> | y <sub>11</sub> <sup>+2</sup>                                  | 942.9943 <sup>+2</sup> | b <sub>21</sub> -3H <sub>3</sub> PO <sub>4</sub> <sup>+2</sup> | 1177.0155 <sup>+2</sup> | y <sub>22</sub> <sup>+2</sup>                                  | 1685.8493               | b <sub>19</sub> -3H <sub>3</sub> PO <sub>4</sub> | 2208.9938 | b <sub>22</sub> -H <sub>3</sub> PO <sub>4</sub>  |
| 642.3570 <sup>+2</sup> | y <sub>13</sub> -H <sub>3</sub> PO <sub>4</sub> <sup>+2</sup>  | 952.4612               | y <sub>8</sub>                                                 | 1187.4381               | b <sub>11</sub>                                                | 1686.7735               | b <sub>18</sub> -2H <sub>3</sub> PO <sub>4</sub> | 2255.0469 | y <sub>22</sub> -H <sub>3</sub> PO <sub>4</sub>  |
| 647.8294 <sup>+2</sup> | y <sub>12</sub> <sup>+2</sup>                                  | 953.5527               | y <sub>9</sub> -H <sub>3</sub> PO <sub>4</sub>                 | 1192.0564 <sup>+2</sup> | MH-H <sub>3</sub> PO <sub>4</sub> <sup>+2</sup>                | 1705.8633               | y <sub>17</sub> -H <sub>3</sub> PO <sub>4</sub>  | 2255.971  | y <sub>21</sub>                                  |
| 651.3097               | b <sub>7</sub> -H <sub>3</sub> PO <sub>4</sub>                 | 956.4642 <sup>+2</sup> | b <sub>20</sub> -2H <sub>3</sub> PO <sub>4</sub> <sup>+2</sup> | 1196.6746               | y <sub>12</sub> -H <sub>3</sub> PO <sub>4</sub>                | 1732.8031               | y <sub>16</sub>                                  | 2306.9707 | b <sub>22</sub>                                  |
| 676.8677 <sup>+2</sup> | y <sub>14</sub> -2H <sub>3</sub> PO <sub>4</sub> <sup>+2</sup> | 965.9909 <sup>+2</sup> | y <sub>20</sub> -2H <sub>3</sub> PO <sub>4</sub> <sup>+2</sup> | 1233.5147               | b <sub>13</sub> -H <sub>3</sub> PO <sub>4</sub>                | 1749.9606               | y <sub>19</sub> -2H <sub>3</sub> PO <sub>4</sub> | 2353.0238 | y <sub>22</sub>                                  |
| 678.2494               | b <sub>6</sub>                                                 | 973.4608 <sup>+2</sup> | y <sub>19</sub> <sup>+2</sup>                                  | 1234.6062               | b <sub>14</sub> -2H <sub>3</sub> PO <sub>4</sub>               | 1776.9004               | y <sub>18</sub> -H <sub>3</sub> PO <sub>4</sub>  | 2383.1054 | MH-H <sub>3</sub> PO <sub>4</sub>                |
| 691.3454 <sup>+2</sup> | y <sub>13</sub> <sup>+2</sup>                                  | 981.5238 <sup>+2</sup> | y <sub>21</sub> -3H <sub>3</sub> PO <sub>4</sub> <sup>+2</sup> | 1237.63                 | y <sub>11</sub>                                                | 1783.6588               | b <sub>17</sub>                                  | 2481.0823 | MH                                               |

MS/MS Fragmentation of RmsDEFVDSFK  
 Found in IPI00024291, Bcl2 antagonist of cell death

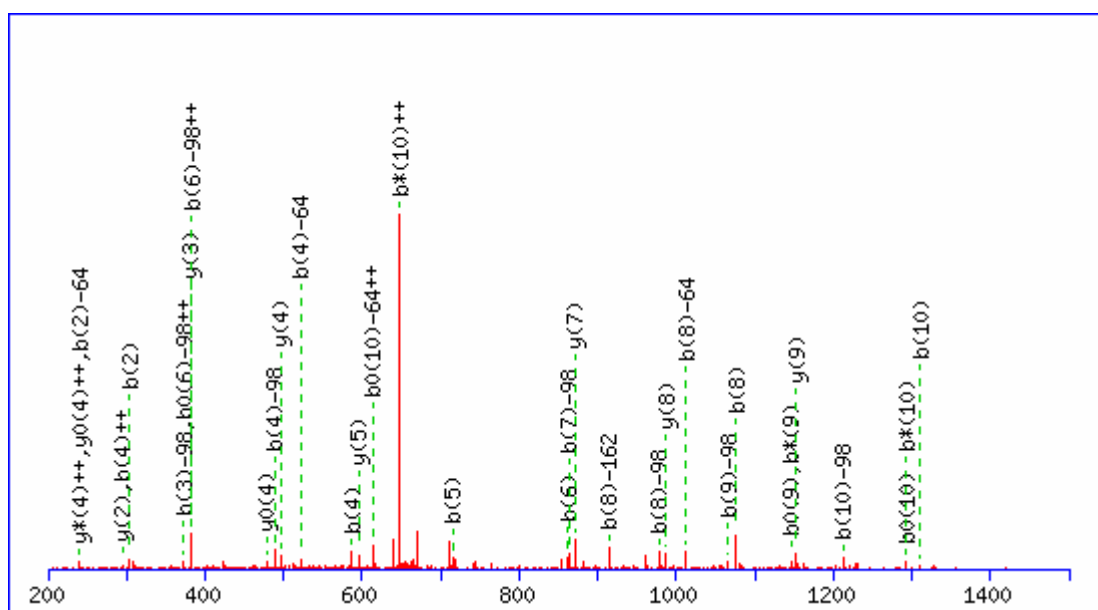

|                        |                                                              |                        |                                                              |                        |                                                               |                        |                                                 |           |                                                 |
|------------------------|--------------------------------------------------------------|------------------------|--------------------------------------------------------------|------------------------|---------------------------------------------------------------|------------------------|-------------------------------------------------|-----------|-------------------------------------------------|
| 74.0600 <sup>+2</sup>  | y <sub>1</sub> <sup>+2</sup>                                 | 309.1210 <sup>+2</sup> | b <sub>5</sub> -H <sub>3</sub> PO <sub>4</sub> <sup>+2</sup> | 493.7269 <sup>+2</sup> | y <sub>8</sub> <sup>+2</sup>                                  | 655.7416 <sup>+2</sup> | b <sub>10</sub> <sup>+2</sup>                   | 1065.4306 | b <sub>9</sub> -H <sub>3</sub> PO <sub>4</sub>  |
| 147.1128               | y <sub>1</sub>                                               | 358.1095 <sup>+2</sup> | b <sub>5</sub> <sup>+2</sup>                                 | 496.2402               | y <sub>4</sub>                                                | 679.8059 <sup>+2</sup> | MH-H <sub>3</sub> PO <sub>4</sub> <sup>+2</sup> | 1076.3755 | b <sub>8</sub>                                  |
| 147.5942 <sup>+2</sup> | y <sub>2</sub> <sup>+2</sup>                                 | 371.6921 <sup>+2</sup> | y <sub>6</sub> <sup>+2</sup>                                 | 528.2376 <sup>+2</sup> | y <sub>9</sub> -H <sub>3</sub> PO <sub>4</sub> <sup>+2</sup>  | 715.2117               | b <sub>5</sub>                                  | 1153.4449 | y <sub>9</sub>                                  |
| 152.5755 <sup>+2</sup> | b <sub>2</sub> <sup>+2</sup>                                 | 373.1653               | b <sub>3</sub> -H <sub>3</sub> PO <sub>4</sub>               | 533.2189 <sup>+2</sup> | b <sub>9</sub> -H <sub>3</sub> PO <sub>4</sub> <sup>+2</sup>  | 728.7943 <sup>+2</sup> | MH <sup>+2</sup>                                | 1163.4075 | b <sub>9</sub>                                  |
| 187.0863 <sup>+2</sup> | b <sub>3</sub> -H <sub>3</sub> PO <sub>4</sub> <sup>+2</sup> | 381.2132               | y <sub>3</sub>                                               | 538.6914 <sup>+2</sup> | b <sub>8</sub> <sup>+2</sup>                                  | 742.377                | y <sub>6</sub>                                  | 1202.5034 | y <sub>10</sub> -H <sub>3</sub> PO <sub>4</sub> |
| 191.1103 <sup>+2</sup> | y <sub>3</sub> <sup>+2</sup>                                 | 382.6552 <sup>+2</sup> | b <sub>6</sub> -H <sub>3</sub> PO <sub>4</sub> <sup>+2</sup> | 577.2261 <sup>+2</sup> | y <sub>9</sub> <sup>+2</sup>                                  | 764.3032               | b <sub>6</sub> -H <sub>3</sub> PO <sub>4</sub>  | 1212.499  | b <sub>10</sub> -H <sub>3</sub> PO <sub>4</sub> |
| 236.0747 <sup>+2</sup> | b <sub>3</sub> <sup>+2</sup>                                 | 431.6437 <sup>+2</sup> | b <sub>6</sub> <sup>+2</sup>                                 | 582.2074 <sup>+2</sup> | b <sub>9</sub> <sup>+2</sup>                                  | 862.2801               | b <sub>6</sub>                                  | 1300.4803 | y <sub>10</sub>                                 |
| 244.5997 <sup>+2</sup> | b <sub>4</sub> -H <sub>3</sub> PO <sub>4</sub> <sup>+2</sup> | 432.1894 <sup>+2</sup> | b <sub>7</sub> -H <sub>3</sub> PO <sub>4</sub> <sup>+2</sup> | 586.1691               | b <sub>4</sub>                                                | 863.3716               | b <sub>7</sub> -H <sub>3</sub> PO <sub>4</sub>  | 1310.4759 | b <sub>10</sub>                                 |
| 248.6237 <sup>+2</sup> | y <sub>4</sub> <sup>+2</sup>                                 | 436.2134 <sup>+2</sup> | y <sub>7</sub> <sup>+2</sup>                                 | 595.3086               | y <sub>5</sub>                                                | 871.4196               | y <sub>7</sub>                                  | 1358.6045 | MH-H <sub>3</sub> PO <sub>4</sub>               |
| 293.5882 <sup>+2</sup> | b <sub>4</sub> <sup>+2</sup>                                 | 471.1421               | b <sub>3</sub>                                               | 601.7553 <sup>+2</sup> | y <sub>10</sub> -H <sub>3</sub> PO <sub>4</sub> <sup>+2</sup> | 961.3485               | b <sub>7</sub>                                  | 1456.5814 | MH                                              |
| 294.1812               | y <sub>2</sub>                                               | 481.1779 <sup>+2</sup> | b <sub>7</sub> <sup>+2</sup>                                 | 606.7531 <sup>+2</sup> | b <sub>10</sub> -H <sub>3</sub> PO <sub>4</sub> <sup>+2</sup> | 978.3986               | b <sub>8</sub> -H <sub>3</sub> PO <sub>4</sub>  |           |                                                 |
| 298.1579 <sup>+2</sup> | y <sub>5</sub> <sup>+2</sup>                                 | 488.1922               | b <sub>4</sub> -H <sub>3</sub> PO <sub>4</sub>               | 617.2348               | b <sub>5</sub> -H <sub>3</sub> PO <sub>4</sub>                | 986.4466               | y <sub>8</sub>                                  |           |                                                 |
| 304.1438               | b <sub>2</sub>                                               | 489.7029 <sup>+2</sup> | b <sub>8</sub> -H <sub>3</sub> PO <sub>4</sub> <sup>+2</sup> | 650.7438 <sup>+2</sup> | y <sub>10</sub> <sup>+2</sup>                                 | 1055.468               | y <sub>9</sub> -H <sub>3</sub> PO <sub>4</sub>  |           |                                                 |

MS/MS Fragmentation of HSsYPAGTEDDEGmGEEPSFR  
 Found in IPI00024291, Bcl2 antagonist of cell death

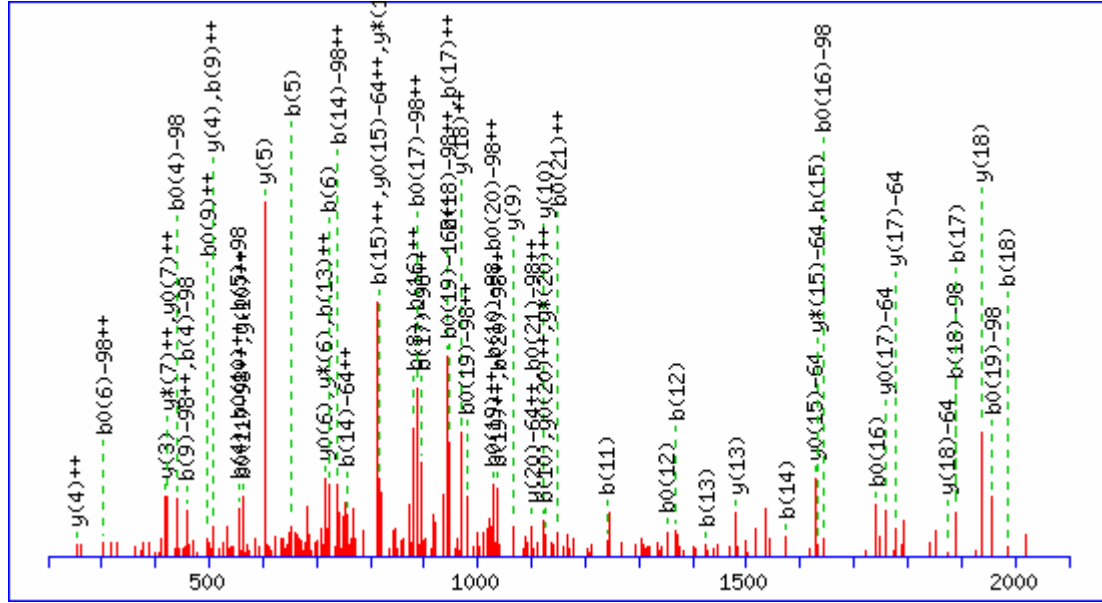

|                        |                                                              |                        |                                                               |                         |                                                               |                         |                                                               |           |                                                 |
|------------------------|--------------------------------------------------------------|------------------------|---------------------------------------------------------------|-------------------------|---------------------------------------------------------------|-------------------------|---------------------------------------------------------------|-----------|-------------------------------------------------|
| 88.0631 <sup>+2</sup>  | y <sub>1</sub> <sup>+2</sup>                                 | 456.6959 <sup>+2</sup> | b <sub>9</sub> -H <sub>3</sub> PO <sub>4</sub> <sup>+2</sup>  | 741.2961 <sup>+2</sup>  | y <sub>13</sub> <sup>+2</sup>                                 | 1050.4286 <sup>+2</sup> | y <sub>19</sub> <sup>+2</sup>                                 | 1630.5363 | b <sub>15</sub>                                 |
| 113.0527 <sup>+2</sup> | b <sub>2</sub> <sup>+2</sup>                                 | 457.183                | b <sub>4</sub> -H <sub>3</sub> PO <sub>4</sub>                | 766.7834 <sup>+2</sup>  | b <sub>15</sub> -H <sub>3</sub> PO <sub>4</sub> <sup>+2</sup> | 1065.467                | y <sub>9</sub>                                                | 1661.602  | b <sub>16</sub> -H <sub>3</sub> PO <sub>4</sub> |
| 147.5635 <sup>+2</sup> | b <sub>3</sub> -H <sub>3</sub> PO <sub>4</sub> <sup>+2</sup> | 459.7194 <sup>+2</sup> | y <sub>8</sub> <sup>+2</sup>                                  | 780.2712                | b <sub>7</sub>                                                | 1084.9393 <sup>+2</sup> | y <sub>20</sub> -H <sub>3</sub> PO <sub>4</sub> <sup>+2</sup> | 1711.6752 | y <sub>15</sub>                                 |
| 161.5973 <sup>+2</sup> | y <sub>2</sub> <sup>+2</sup>                                 | 505.6844 <sup>+2</sup> | b <sub>9</sub> <sup>+2</sup>                                  | 783.342                 | b <sub>8</sub> -H <sub>3</sub> PO <sub>4</sub>                | 1085.3832 <sup>+2</sup> | b <sub>20</sub> <sup>+2</sup>                                 | 1759.5789 | b <sub>16</sub>                                 |
| 175.119                | y <sub>1</sub>                                               | 506.2722               | y <sub>4</sub>                                                | 787.2611 <sup>+2</sup>  | b <sub>14</sub> <sup>+2</sup>                                 | 1109.9289 <sup>+2</sup> | b <sub>21</sub> -H <sub>3</sub> PO <sub>4</sub> <sup>+2</sup> | 1768.6966 | y <sub>16</sub>                                 |
| 196.5519 <sup>+2</sup> | b <sub>3</sub> <sup>+2</sup>                                 | 514.2094 <sup>+2</sup> | b <sub>10</sub> -H <sub>3</sub> PO <sub>4</sub> <sup>+2</sup> | 805.8174 <sup>+2</sup>  | y <sub>14</sub> <sup>+2</sup>                                 | 1122.4884               | y <sub>10</sub>                                               | 1790.6446 | b <sub>17</sub> -H <sub>3</sub> PO <sub>4</sub> |
| 210.1237 <sup>+2</sup> | y <sub>3</sub> <sup>+2</sup>                                 | 533.2371 <sup>+2</sup> | y <sub>9</sub> <sup>+2</sup>                                  | 815.7718 <sup>+2</sup>  | b <sub>15</sub> <sup>+2</sup>                                 | 1125.3885               | b <sub>10</sub>                                               | 1839.7338 | y <sub>17</sub>                                 |
| 225.0982               | b <sub>2</sub>                                               | 554.2358               | b <sub>5</sub> -H <sub>3</sub> PO <sub>4</sub>                | 831.3046 <sup>+2</sup>  | b <sub>16</sub> -H <sub>3</sub> PO <sub>4</sub> <sup>+2</sup> | 1128.4553 <sup>+2</sup> | y <sub>21</sub> -H <sub>3</sub> PO <sub>4</sub> <sup>+2</sup> | 1887.6974 | b <sub>18</sub> -H <sub>3</sub> PO <sub>4</sub> |
| 229.0951 <sup>+2</sup> | b <sub>4</sub> -H <sub>3</sub> PO <sub>4</sub> <sup>+2</sup> | 555.1599               | b <sub>4</sub>                                                | 856.3412 <sup>+2</sup>  | y <sub>15</sub> <sup>+2</sup>                                 | 1133.9277 <sup>+2</sup> | y <sub>20</sub> <sup>+2</sup>                                 | 1888.6215 | b <sub>17</sub>                                 |
| 253.6397 <sup>+2</sup> | y <sub>4</sub> <sup>+2</sup>                                 | 561.7479 <sup>+2</sup> | y <sub>10</sub> <sup>+2</sup>                                 | 861.4101                | y <sub>7</sub>                                                | 1142.4385               | b <sub>11</sub> -H <sub>3</sub> PO <sub>4</sub>               | 1936.7865 | y <sub>18</sub>                                 |
| 277.6215 <sup>+2</sup> | b <sub>5</sub> -H <sub>3</sub> PO <sub>4</sub> <sup>+2</sup> | 563.1979 <sup>+2</sup> | b <sub>10</sub> <sup>+2</sup>                                 | 880.2931 <sup>+2</sup>  | b <sub>16</sub> <sup>+2</sup>                                 | 1158.9174 <sup>+2</sup> | b <sub>21</sub> <sup>+2</sup>                                 | 1974.7294 | b <sub>19</sub> -H <sub>3</sub> PO <sub>4</sub> |
| 278.0836 <sup>+2</sup> | b <sub>4</sub> <sup>+2</sup>                                 | 571.7229 <sup>+2</sup> | b <sub>11</sub> -H <sub>3</sub> PO <sub>4</sub> <sup>+2</sup> | 881.3189                | b <sub>8</sub>                                                | 1177.4438 <sup>+2</sup> | y <sub>21</sub> <sup>+2</sup>                                 | 1985.6743 | b <sub>18</sub>                                 |
| 294.1197               | b <sub>3</sub> -H <sub>3</sub> PO <sub>4</sub>               | 603.3249               | y <sub>5</sub>                                                | 884.8520 <sup>+2</sup>  | y <sub>16</sub> <sup>+2</sup>                                 | 1196.9848 <sup>+2</sup> | MH-H <sub>3</sub> PO <sub>4</sub> <sup>+2</sup>               | 2071.7822 | b <sub>20</sub> -H <sub>3</sub> PO <sub>4</sub> |
| 302.1661 <sup>+2</sup> | y <sub>5</sub> <sup>+2</sup>                                 | 620.7113 <sup>+2</sup> | b <sub>11</sub> <sup>+2</sup>                                 | 895.8259 <sup>+2</sup>  | b <sub>17</sub> -H <sub>3</sub> PO <sub>4</sub> <sup>+2</sup> | 1240.4154               | b <sub>11</sub>                                               | 2072.7063 | b <sub>19</sub>                                 |
| 313.1401 <sup>+2</sup> | b <sub>6</sub> -H <sub>3</sub> PO <sub>4</sub> <sup>+2</sup> | 625.2729               | b <sub>6</sub> -H <sub>3</sub> PO <sub>4</sub>                | 912.3846                | b <sub>9</sub> -H <sub>3</sub> PO <sub>4</sub>                | 1245.9732 <sup>+2</sup> | MH <sup>+2</sup>                                              | 2099.8499 | y <sub>19</sub>                                 |
| 322.1874               | y <sub>2</sub>                                               | 626.2692 <sup>+2</sup> | y <sub>11</sub> <sup>+2</sup>                                 | 918.4316                | y <sub>8</sub>                                                | 1251.531                | y <sub>11</sub>                                               | 2168.8713 | y <sub>20</sub> -H <sub>3</sub> PO <sub>4</sub> |
| 326.6100 <sup>+2</sup> | b <sub>5</sub> <sup>+2</sup>                                 | 636.2442 <sup>+2</sup> | b <sub>12</sub> -H <sub>3</sub> PO <sub>4</sub> <sup>+2</sup> | 920.3705 <sup>+2</sup>  | y <sub>17</sub> <sup>+2</sup>                                 | 1271.4811               | b <sub>12</sub> -H <sub>3</sub> PO <sub>4</sub>               | 2169.7591 | b <sub>20</sub>                                 |
| 341.6508 <sup>+2</sup> | b <sub>7</sub> -H <sub>3</sub> PO <sub>4</sub> <sup>+2</sup> | 652.2127               | b <sub>5</sub>                                                | 944.3523 <sup>+2</sup>  | b <sub>18</sub> -H <sub>3</sub> PO <sub>4</sub> <sup>+2</sup> | 1328.5026               | b <sub>13</sub> -H <sub>3</sub> PO <sub>4</sub>               | 2218.8506 | b <sub>21</sub> -H <sub>3</sub> PO <sub>4</sub> |
| 362.1285 <sup>+2</sup> | b <sub>6</sub> <sup>+2</sup>                                 | 664.7549 <sup>+2</sup> | b <sub>13</sub> -H <sub>3</sub> PO <sub>4</sub> <sup>+2</sup> | 944.8144 <sup>+2</sup>  | b <sub>17</sub> <sup>+2</sup>                                 | 1366.558                | y <sub>12</sub>                                               | 2255.9033 | y <sub>21</sub> -H <sub>3</sub> PO <sub>4</sub> |
| 366.6874 <sup>+2</sup> | y <sub>6</sub> <sup>+2</sup>                                 | 682.2944               | b <sub>7</sub> -H <sub>3</sub> PO <sub>4</sub>                | 968.8969 <sup>+2</sup>  | y <sub>18</sub> <sup>+2</sup>                                 | 1369.458                | b <sub>12</sub>                                               | 2266.8482 | y <sub>20</sub>                                 |
| 390.6393 <sup>+2</sup> | b <sub>7</sub> <sup>+2</sup>                                 | 683.7826 <sup>+2</sup> | y <sub>12</sub> <sup>+2</sup>                                 | 987.8683 <sup>+2</sup>  | b <sub>19</sub> -H <sub>3</sub> PO <sub>4</sub> <sup>+2</sup> | 1426.4795               | b <sub>13</sub>                                               | 2316.8275 | b <sub>21</sub>                                 |
| 392.0966               | b <sub>3</sub>                                               | 685.2326 <sup>+2</sup> | b <sub>12</sub> <sup>+2</sup>                                 | 993.3408 <sup>+2</sup>  | b <sub>18</sub> <sup>+2</sup>                                 | 1475.538                | b <sub>14</sub> -H <sub>3</sub> PO <sub>4</sub>               | 2353.8802 | y <sub>21</sub>                                 |
| 392.1747 <sup>+2</sup> | b <sub>8</sub> -H <sub>3</sub> PO <sub>4</sub> <sup>+2</sup> | 713.7434 <sup>+2</sup> | b <sub>13</sub> <sup>+2</sup>                                 | 1010.3615               | b <sub>9</sub>                                                | 1481.5849               | y <sub>13</sub>                                               | 2392.9623 | MH-H <sub>3</sub> PO <sub>4</sub>               |
| 419.2401               | y <sub>3</sub>                                               | 723.2498               | b <sub>6</sub>                                                | 1027.4116               | b <sub>10</sub> -H <sub>3</sub> PO <sub>4</sub>               | 1532.5594               | b <sub>15</sub> -H <sub>3</sub> PO <sub>4</sub>               | 2490.9392 | MH                                              |
| 431.2087 <sup>+2</sup> | y <sub>7</sub> <sup>+2</sup>                                 | 732.3675               | y <sub>6</sub>                                                | 1036.3947 <sup>+2</sup> | b <sub>20</sub> -H <sub>3</sub> PO <sub>4</sub> <sup>+2</sup> | 1573.5149               | b <sub>14</sub>                                               |           |                                                 |
| 441.1631 <sup>+2</sup> | b <sub>8</sub> <sup>+2</sup>                                 | 738.2726 <sup>+2</sup> | b <sub>14</sub> -H <sub>3</sub> PO <sub>4</sub> <sup>+2</sup> | 1036.8568 <sup>+2</sup> | b <sub>19</sub> <sup>+2</sup>                                 | 1610.6275               | y <sub>14</sub>                                               |           |                                                 |

MS/MS Fragmentation of TNsDSALHQSTmTPTQPESFSSGSQDVHQK  
 Found in IPI00303383, Isoform 3 of CREB-regulated transcription coactivator 1

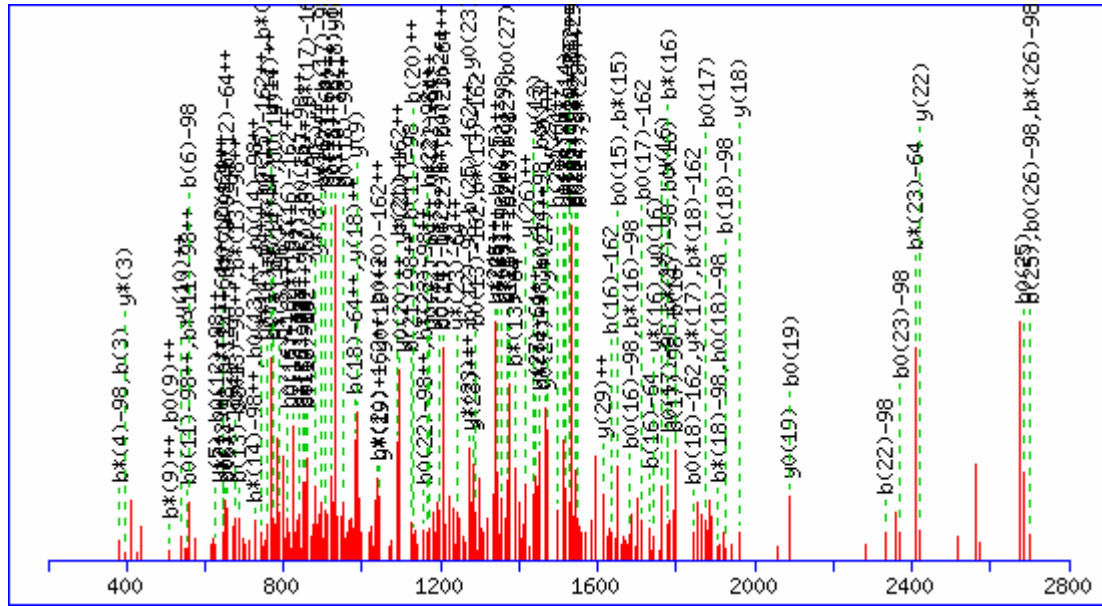

|                        |                                                               |                         |                                                               |                         |                                                               |                         |                                                               |           |                                                 |
|------------------------|---------------------------------------------------------------|-------------------------|---------------------------------------------------------------|-------------------------|---------------------------------------------------------------|-------------------------|---------------------------------------------------------------|-----------|-------------------------------------------------|
| 74.0600 <sup>+2</sup>  | y <sub>1</sub> <sup>+2</sup>                                  | 653.8047 <sup>+2</sup>  | y <sub>12</sub> <sup>+2</sup>                                 | 1053.9735 <sup>+2</sup> | y <sub>19</sub> <sup>+2</sup>                                 | 1435.6448               | y <sub>13</sub>                                               | 2207.9874 | y <sub>20</sub>                                 |
| 138.0893 <sup>+2</sup> | y <sub>2</sub> <sup>+2</sup>                                  | 656.1923                | b <sub>6</sub>                                                | 1055.4252 <sup>+2</sup> | b <sub>19</sub> <sup>+2</sup>                                 | 1459.0951 <sup>+2</sup> | b <sub>27</sub> <sup>+2</sup>                                 | 2245.9666 | b <sub>21</sub> -H <sub>3</sub> PO <sub>4</sub> |
| 147.1128               | y <sub>1</sub>                                                | 671.2995                | b <sub>7</sub> -H <sub>3</sub> PO <sub>4</sub>                | 1072.5018               | y <sub>10</sub>                                               | 1469.6325               | b <sub>14</sub> -H <sub>3</sub> PO <sub>4</sub>               | 2256.9115 | b <sub>20</sub>                                 |
| 206.6188 <sup>+2</sup> | y <sub>3</sub> <sup>+2</sup>                                  | 685.2581 <sup>+2</sup>  | b <sub>12</sub> <sup>+2</sup>                                 | 1079.9709 <sup>+2</sup> | b <sub>20</sub> -H <sub>3</sub> PO <sub>4</sub> <sup>+2</sup> | 1470.5567               | b <sub>13</sub>                                               | 2295.0194 | y <sub>21</sub>                                 |
| 216.0979               | b <sub>2</sub>                                                | 686.7935 <sup>+2</sup>  | b <sub>13</sub> -H <sub>3</sub> PO <sub>4</sub> <sup>+2</sup> | 1104.4973 <sup>+2</sup> | y <sub>20</sub> <sup>+2</sup>                                 | 1473.6621 <sup>+2</sup> | y <sub>27</sub> <sup>+2</sup>                                 | 2332.9986 | b <sub>22</sub> -H <sub>3</sub> PO <sub>4</sub> |
| 256.1530 <sup>+2</sup> | y <sub>4</sub> <sup>+2</sup>                                  | 718.3260 <sup>+2</sup>  | y <sub>13</sub> <sup>+2</sup>                                 | 1121.4259               | b <sub>10</sub>                                               | 1478.6361 <sup>+2</sup> | b <sub>28</sub> -H <sub>3</sub> PO <sub>4</sub> <sup>+2</sup> | 2343.9435 | b <sub>21</sub>                                 |
| 275.1714               | y <sub>2</sub>                                                | 735.3199 <sup>+2</sup>  | b <sub>14</sub> -H <sub>3</sub> PO <sub>4</sub> <sup>+2</sup> | 1123.4869 <sup>+2</sup> | b <sub>21</sub> -H <sub>3</sub> PO <sub>4</sub> <sup>+2</sup> | 1508.1729 <sup>+2</sup> | y <sub>28</sub> -H <sub>3</sub> PO <sub>4</sub> <sup>+2</sup> | 2390.0201 | b <sub>23</sub> -H <sub>3</sub> PO <sub>4</sub> |
| 285.1193               | b <sub>3</sub> -H <sub>3</sub> PO <sub>4</sub>                | 735.7820 <sup>+2</sup>  | b <sub>13</sub> <sup>+2</sup>                                 | 1124.4967               | b <sub>11</sub> -H <sub>3</sub> PO <sub>4</sub>               | 1527.6246 <sup>+2</sup> | b <sub>28</sub> <sup>+2</sup>                                 | 2423.078  | y <sub>22</sub>                                 |
| 313.6665 <sup>+2</sup> | y <sub>5</sub> <sup>+2</sup>                                  | 754.3842                | y <sub>6</sub>                                                | 1128.9594 <sup>+2</sup> | b <sub>20</sub> <sup>+2</sup>                                 | 1532.6976               | y <sub>14</sub>                                               | 2430.9755 | b <sub>22</sub>                                 |
| 377.6958 <sup>+2</sup> | y <sub>6</sub> <sup>+2</sup>                                  | 766.8524 <sup>+2</sup>  | y <sub>14</sub> <sup>+2</sup>                                 | 1148.0133 <sup>+2</sup> | y <sub>21</sub> <sup>+2</sup>                                 | 1542.6654 <sup>+2</sup> | b <sub>29</sub> -H <sub>3</sub> PO <sub>4</sub> <sup>+2</sup> | 2477.0521 | b <sub>24</sub> -H <sub>3</sub> PO <sub>4</sub> |
| 383.0962               | b <sub>3</sub>                                                | 769.2764                | b <sub>7</sub>                                                | 1167.0030 <sup>+2</sup> | b <sub>22</sub> -H <sub>3</sub> PO <sub>4</sub> <sup>+2</sup> | 1557.1613 <sup>+2</sup> | y <sub>28</sub> <sup>+2</sup>                                 | 2487.997  | b <sub>23</sub>                                 |
| 400.1463               | b <sub>4</sub> -H <sub>3</sub> PO <sub>4</sub>                | 784.3084 <sup>+2</sup>  | b <sub>14</sub> <sup>+2</sup>                                 | 1172.4754 <sup>+2</sup> | b <sub>21</sub> <sup>+2</sup>                                 | 1565.1943 <sup>+2</sup> | y <sub>29</sub> -H <sub>3</sub> PO <sub>4</sub> <sup>+2</sup> | 2560.1369 | y <sub>23</sub>                                 |
| 404.6828 <sup>+2</sup> | b <sub>8</sub> -H <sub>3</sub> PO <sub>4</sub> <sup>+2</sup>  | 785.8437 <sup>+2</sup>  | b <sub>15</sub> -H <sub>3</sub> PO <sub>4</sub> <sup>+2</sup> | 1195.5137 <sup>+2</sup> | b <sub>23</sub> -H <sub>3</sub> PO <sub>4</sub> <sup>+2</sup> | 1567.6094               | b <sub>14</sub>                                               | 2575.029  | b <sub>24</sub>                                 |
| 412.2303               | y <sub>3</sub>                                                | 808.3584                | b <sub>8</sub> -H <sub>3</sub> PO <sub>4</sub>                | 1212.0426 <sup>+2</sup> | y <sub>22</sub> <sup>+2</sup>                                 | 1570.6802               | b <sub>15</sub> -H <sub>3</sub> PO <sub>4</sub>               | 2605.1107 | b <sub>25</sub> -H <sub>3</sub> PO <sub>4</sub> |
| 421.2118 <sup>+2</sup> | y <sub>7</sub> <sup>+2</sup>                                  | 830.8817 <sup>+2</sup>  | y <sub>15</sub> <sup>+2</sup>                                 | 1215.9914 <sup>+2</sup> | b <sub>22</sub> <sup>+2</sup>                                 | 1591.6539 <sup>+2</sup> | b <sub>29</sub> <sup>+2</sup>                                 | 2673.2209 | y <sub>24</sub>                                 |
| 449.7225 <sup>+2</sup> | y <sub>8</sub> <sup>+2</sup>                                  | 834.8322 <sup>+2</sup>  | b <sub>15</sub> <sup>+2</sup>                                 | 1219.5702               | y <sub>11</sub>                                               | 1614.1828 <sup>+2</sup> | y <sub>29</sub> <sup>+2</sup>                                 | 2703.0876 | b <sub>25</sub>                                 |
| 453.6713 <sup>+2</sup> | b <sub>8</sub> <sup>+2</sup>                                  | 841.4163                | y <sub>7</sub>                                                | 1222.4736               | b <sub>11</sub>                                               | 1615.7182 <sup>+2</sup> | MH-H <sub>3</sub> PO <sub>4</sub> <sup>+2</sup>               | 2720.1377 | b <sub>26</sub> -H <sub>3</sub> PO <sub>4</sub> |
| 468.7121 <sup>+2</sup> | b <sub>9</sub> -H <sub>3</sub> PO <sub>4</sub> <sup>+2</sup>  | 849.8730 <sup>+2</sup>  | b <sub>16</sub> -H <sub>3</sub> PO <sub>4</sub> <sup>+2</sup> | 1239.0297 <sup>+2</sup> | b <sub>24</sub> -H <sub>3</sub> PO <sub>4</sub> <sup>+2</sup> | 1660.7562               | y <sub>15</sub>                                               | 2744.258  | y <sub>25</sub>                                 |
| 487.1783               | b <sub>5</sub> -H <sub>3</sub> PO <sub>4</sub>                | 881.4056 <sup>+2</sup>  | y <sub>16</sub> <sup>+2</sup>                                 | 1244.5021 <sup>+2</sup> | b <sub>23</sub> <sup>+2</sup>                                 | 1664.7066 <sup>+2</sup> | MH <sup>+2</sup>                                              | 2818.1146 | b <sub>26</sub>                                 |
| 493.2385 <sup>+2</sup> | y <sub>9</sub> <sup>+2</sup>                                  | 898.3994 <sup>+2</sup>  | b <sub>17</sub> -H <sub>3</sub> PO <sub>4</sub> <sup>+2</sup> | 1271.5321               | b <sub>12</sub> -H <sub>3</sub> PO <sub>4</sub>               | 1668.6571               | b <sub>15</sub>                                               | 2819.2061 | b <sub>27</sub> -H <sub>3</sub> PO <sub>4</sub> |
| 498.1232               | b <sub>4</sub>                                                | 898.4377                | y <sub>8</sub>                                                | 1280.5721 <sup>+2</sup> | y <sub>23</sub> <sup>+2</sup>                                 | 1698.7388               | b <sub>16</sub> -H <sub>3</sub> PO <sub>4</sub>               | 2831.2901 | y <sub>26</sub>                                 |
| 511.2987               | y <sub>4</sub>                                                | 898.8615 <sup>+2</sup>  | b <sub>16</sub> <sup>+2</sup>                                 | 1288.0182 <sup>+2</sup> | b <sub>24</sub> <sup>+2</sup>                                 | 1761.8038               | y <sub>16</sub>                                               | 2917.183  | b <sub>27</sub>                                 |
| 512.2281 <sup>+2</sup> | b <sub>10</sub> -H <sub>3</sub> PO <sub>4</sub> <sup>+2</sup> | 906.3353                | b <sub>8</sub>                                                | 1303.0590 <sup>+2</sup> | b <sub>25</sub> -H <sub>3</sub> PO <sub>4</sub> <sup>+2</sup> | 1795.7916               | b <sub>17</sub> -H <sub>3</sub> PO <sub>4</sub>               | 2946.317  | y <sub>27</sub>                                 |
| 517.7006 <sup>+2</sup> | b <sub>9</sub> <sup>+2</sup>                                  | 929.9319 <sup>+2</sup>  | y <sub>17</sub> <sup>+2</sup>                                 | 1306.6022               | y <sub>12</sub>                                               | 1796.7157               | b <sub>16</sub>                                               | 2956.265  | b <sub>28</sub> -H <sub>3</sub> PO <sub>4</sub> |
| 536.7545 <sup>+2</sup> | y <sub>10</sub> <sup>+2</sup>                                 | 936.417                 | b <sub>9</sub> -H <sub>3</sub> PO <sub>4</sub>                | 1337.1141 <sup>+2</sup> | y <sub>24</sub> <sup>+2</sup>                                 | 1858.8566               | y <sub>17</sub>                                               | 3015.3385 | y <sub>28</sub> -H <sub>3</sub> PO <sub>4</sub> |
| 558.2154               | b <sub>6</sub> -H <sub>3</sub> PO <sub>4</sub>                | 947.3879 <sup>+2</sup>  | b <sub>17</sub> <sup>+2</sup>                                 | 1352.0474 <sup>+2</sup> | b <sub>25</sub> <sup>+2</sup>                                 | 1893.7684               | b <sub>17</sub>                                               | 3054.2419 | b <sub>28</sub>                                 |
| 561.2166 <sup>+2</sup> | b <sub>10</sub> <sup>+2</sup>                                 | 962.9207 <sup>+2</sup>  | b <sub>18</sub> -H <sub>3</sub> PO <sub>4</sub> <sup>+2</sup> | 1360.5725 <sup>+2</sup> | b <sub>26</sub> -H <sub>3</sub> PO <sub>4</sub> <sup>+2</sup> | 1924.8341               | b <sub>18</sub> -H <sub>3</sub> PO <sub>4</sub>               | 3084.3236 | b <sub>29</sub> -H <sub>3</sub> PO <sub>4</sub> |
| 562.7520 <sup>+2</sup> | b <sub>11</sub> -H <sub>3</sub> PO <sub>4</sub> <sup>+2</sup> | 980.4558 <sup>+2</sup>  | y <sub>18</sub> <sup>+2</sup>                                 | 1369.509                | b <sub>12</sub>                                               | 1959.9043               | y <sub>18</sub>                                               | 3113.3154 | y <sub>28</sub>                                 |
| 585.1552               | b <sub>5</sub>                                                | 985.4697                | y <sub>9</sub>                                                | 1372.5798               | b <sub>13</sub> -H <sub>3</sub> PO <sub>4</sub>               | 2011.8662               | b <sub>19</sub> -H <sub>3</sub> PO <sub>4</sub>               | 3129.3814 | y <sub>29</sub> -H <sub>3</sub> PO <sub>4</sub> |
| 610.2887 <sup>+2</sup> | y <sub>11</sub> <sup>+2</sup>                                 | 1006.4367 <sup>+2</sup> | b <sub>19</sub> -H <sub>3</sub> PO <sub>4</sub> <sup>+2</sup> | 1372.6327 <sup>+2</sup> | y <sub>25</sub> <sup>+2</sup>                                 | 2022.811                | b <sub>18</sub>                                               | 3182.3005 | b <sub>29</sub>                                 |
| 611.7404 <sup>+2</sup> | b <sub>11</sub> <sup>+2</sup>                                 | 1011.9092 <sup>+2</sup> | b <sub>18</sub> <sup>+2</sup>                                 | 1409.5609 <sup>+2</sup> | b <sub>26</sub> <sup>+2</sup>                                 | 2106.9397               | y <sub>19</sub>                                               | 3227.3583 | y <sub>29</sub>                                 |
| 626.3257               | y <sub>5</sub>                                                | 1023.449                | b <sub>10</sub> -H <sub>3</sub> PO <sub>4</sub>               | 1410.1067 <sup>+2</sup> | b <sub>27</sub> -H <sub>3</sub> PO <sub>4</sub> <sup>+2</sup> | 2109.8431               | b <sub>19</sub>                                               | 3230.4291 | MH-H <sub>3</sub> PO <sub>4</sub>               |
| 636.2697 <sup>+2</sup> | b <sub>12</sub> -H <sub>3</sub> PO <sub>4</sub> <sup>+2</sup> | 1034.3939               | b <sub>9</sub>                                                | 1416.1487 <sup>+2</sup> | y <sub>26</sub> <sup>+2</sup>                                 | 2158.9346               | b <sub>20</sub> -H <sub>3</sub> PO <sub>4</sub>               | 3328.406  | MH                                              |

MS/MS Fragmentation of RtNSDSALHQSTmTPTQPESFSSGSQDVHQQ  
 Found in IPI00303383, Isoform 3 of CREB-regulated transcription coactivator 1

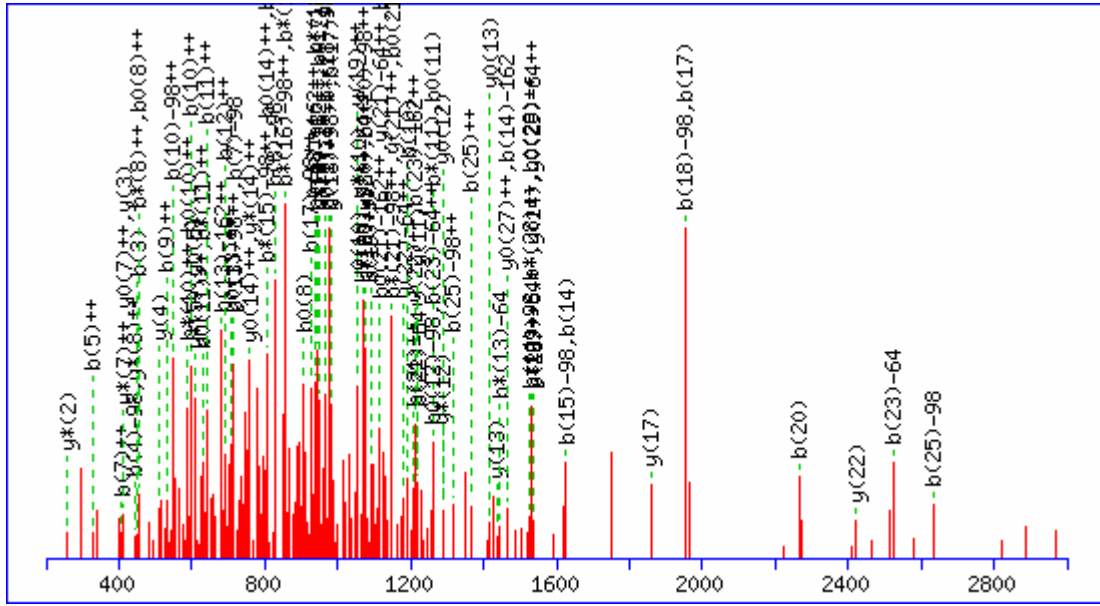

|                        |                                                               |                        |                                                               |                         |                                                               |                         |                                                               |           |                                                 |
|------------------------|---------------------------------------------------------------|------------------------|---------------------------------------------------------------|-------------------------|---------------------------------------------------------------|-------------------------|---------------------------------------------------------------|-----------|-------------------------------------------------|
| 74.0600 <sup>+2</sup>  | y <sub>1</sub> <sup>+2</sup>                                  | 556.2474               | b <sub>5</sub> -H <sub>3</sub> PO <sub>4</sub>                | 985.4697                | y <sub>9</sub>                                                | 1435.6448               | y <sub>13</sub>                                               | 2265.9442 | b <sub>20</sub>                                 |
| 120.5764 <sup>+2</sup> | b <sub>2</sub> -H <sub>3</sub> PO <sub>4</sub> <sup>+2</sup>  | 590.2787 <sup>+2</sup> | b <sub>11</sub> -H <sub>3</sub> PO <sub>4</sub> <sup>+2</sup> | 1025.4384 <sup>+2</sup> | b <sub>18</sub> <sup>+2</sup>                                 | 1438.6230 <sup>+2</sup> | b <sub>27</sub> -H <sub>3</sub> PO <sub>4</sub> <sup>+2</sup> | 2295.0194 | y <sub>21</sub>                                 |
| 138.0893 <sup>+2</sup> | y <sub>2</sub> <sup>+2</sup>                                  | 595.7511 <sup>+2</sup> | b <sub>10</sub> <sup>+2</sup>                                 | 1040.9713 <sup>+2</sup> | b <sub>19</sub> -H <sub>3</sub> PO <sub>4</sub> <sup>+2</sup> | 1473.6621 <sup>+2</sup> | y <sub>27</sub> <sup>+2</sup>                                 | 2315.0357 | b <sub>21</sub> -H <sub>3</sub> PO <sub>4</sub> |
| 147.1128               | y <sub>1</sub>                                                | 610.2887 <sup>+2</sup> | y <sub>11</sub> <sup>+2</sup>                                 | 1053.9735 <sup>+2</sup> | y <sub>19</sub> <sup>+2</sup>                                 | 1487.6115 <sup>+2</sup> | b <sub>27</sub> <sup>+2</sup>                                 | 2402.0677 | b <sub>22</sub> -H <sub>3</sub> PO <sub>4</sub> |
| 169.5648 <sup>+2</sup> | b <sub>2</sub> <sup>+2</sup>                                  | 626.3257               | y <sub>5</sub>                                                | 1062.4364               | b <sub>9</sub>                                                | 1488.1572 <sup>+2</sup> | b <sub>28</sub> -H <sub>3</sub> PO <sub>4</sub> <sup>+2</sup> | 2413.0126 | b <sub>21</sub>                                 |
| 177.5979 <sup>+2</sup> | b <sub>3</sub> -H <sub>3</sub> PO <sub>4</sub> <sup>+2</sup>  | 639.2671 <sup>+2</sup> | b <sub>11</sub> <sup>+2</sup>                                 | 1072.5018               | y <sub>10</sub>                                               | 1517.1782 <sup>+2</sup> | y <sub>28</sub> <sup>+2</sup>                                 | 2423.078  | y <sub>22</sub>                                 |
| 206.6188 <sup>+2</sup> | y <sub>3</sub> <sup>+2</sup>                                  | 640.8025 <sup>+2</sup> | b <sub>12</sub> -H <sub>3</sub> PO <sub>4</sub> <sup>+2</sup> | 1084.4873 <sup>+2</sup> | b <sub>20</sub> -H <sub>3</sub> PO <sub>4</sub> <sup>+2</sup> | 1525.6101               | b <sub>13</sub>                                               | 2489.0998 | b <sub>23</sub> -H <sub>3</sub> PO <sub>4</sub> |
| 221.1139 <sup>+2</sup> | b <sub>4</sub> -H <sub>3</sub> PO <sub>4</sub> <sup>+2</sup>  | 643.2794               | b <sub>6</sub> -H <sub>3</sub> PO <sub>4</sub>                | 1089.9597 <sup>+2</sup> | b <sub>19</sub> <sup>+2</sup>                                 | 1528.6809               | b <sub>14</sub> -H <sub>3</sub> PO <sub>4</sub>               | 2500.0446 | b <sub>22</sub>                                 |
| 226.5863 <sup>+2</sup> | b <sub>3</sub> <sup>+2</sup>                                  | 653.8047 <sup>+2</sup> | y <sub>12</sub> <sup>+2</sup>                                 | 1092.5181               | b <sub>10</sub> -H <sub>3</sub> PO <sub>4</sub>               | 1532.6976               | y <sub>14</sub>                                               | 2546.1212 | b <sub>24</sub> -H <sub>3</sub> PO <sub>4</sub> |
| 240.1455               | b <sub>2</sub> -H <sub>3</sub> PO <sub>4</sub>                | 654.2243               | b <sub>5</sub>                                                | 1104.4973 <sup>+2</sup> | y <sub>20</sub> <sup>+2</sup>                                 | 1537.1457 <sup>+2</sup> | b <sub>28</sub> <sup>+2</sup>                                 | 2560.1369 | y <sub>23</sub>                                 |
| 256.1530 <sup>+2</sup> | y <sub>4</sub> <sup>+2</sup>                                  | 689.7910 <sup>+2</sup> | b <sub>12</sub> <sup>+2</sup>                                 | 1133.4757 <sup>+2</sup> | b <sub>20</sub> <sup>+2</sup>                                 | 1556.6867 <sup>+2</sup> | b <sub>29</sub> -H <sub>3</sub> PO <sub>4</sub> <sup>+2</sup> | 2587.0767 | b <sub>23</sub>                                 |
| 270.1023 <sup>+2</sup> | b <sub>4</sub> <sup>+2</sup>                                  | 714.3165               | b <sub>7</sub> -H <sub>3</sub> PO <sub>4</sub>                | 1148.0133 <sup>+2</sup> | y <sub>21</sub> <sup>+2</sup>                                 | 1574.1996 <sup>+2</sup> | y <sub>29</sub> <sup>+2</sup>                                 | 2633.1532 | b <sub>25</sub> -H <sub>3</sub> PO <sub>4</sub> |
| 275.1714               | y <sub>2</sub>                                                | 714.3202 <sup>+2</sup> | b <sub>13</sub> -H <sub>3</sub> PO <sub>4</sub> <sup>+2</sup> | 1158.0215 <sup>+2</sup> | b <sub>21</sub> -H <sub>3</sub> PO <sub>4</sub> <sup>+2</sup> | 1605.6751 <sup>+2</sup> | b <sub>29</sub> <sup>+2</sup>                                 | 2644.0981 | b <sub>24</sub>                                 |
| 278.6273 <sup>+2</sup> | b <sub>5</sub> -H <sub>3</sub> PO <sub>4</sub> <sup>+2</sup>  | 718.3260 <sup>+2</sup> | y <sub>13</sub> <sup>+2</sup>                                 | 1179.5501               | b <sub>11</sub> -H <sub>3</sub> PO <sub>4</sub>               | 1615.7182 <sup>+2</sup> | y <sub>30</sub> -H <sub>3</sub> PO <sub>4</sub> <sup>+2</sup> | 2673.2209 | y <sub>24</sub>                                 |
| 313.6665 <sup>+2</sup> | y <sub>5</sub> <sup>+2</sup>                                  | 741.2563               | b <sub>6</sub>                                                | 1190.495                | b <sub>10</sub>                                               | 1620.7160 <sup>+2</sup> | b <sub>30</sub> -H <sub>3</sub> PO <sub>4</sub> <sup>+2</sup> | 2731.1301 | b <sub>25</sub>                                 |
| 322.1434 <sup>+2</sup> | b <sub>6</sub> -H <sub>3</sub> PO <sub>4</sub> <sup>+2</sup>  | 754.3842               | y <sub>6</sub>                                                | 1201.5375 <sup>+2</sup> | b <sub>22</sub> -H <sub>3</sub> PO <sub>4</sub> <sup>+2</sup> | 1625.7336               | b <sub>15</sub> -H <sub>3</sub> PO <sub>4</sub>               | 2744.258  | y <sub>25</sub>                                 |
| 327.6158 <sup>+2</sup> | b <sub>5</sub> <sup>+2</sup>                                  | 763.3087 <sup>+2</sup> | b <sub>13</sub> <sup>+2</sup>                                 | 1207.0099 <sup>+2</sup> | b <sub>21</sub> <sup>+2</sup>                                 | 1626.6578               | b <sub>14</sub>                                               | 2761.2118 | b <sub>26</sub> -H <sub>3</sub> PO <sub>4</sub> |
| 338.1224               | b <sub>2</sub>                                                | 764.8441 <sup>+2</sup> | b <sub>14</sub> -H <sub>3</sub> PO <sub>4</sub> <sup>+2</sup> | 1212.0426 <sup>+2</sup> | y <sub>22</sub> <sup>+2</sup>                                 | 1660.7562               | y <sub>15</sub>                                               | 2831.2901 | y <sub>26</sub>                                 |
| 354.1884               | b <sub>3</sub> -H <sub>3</sub> PO <sub>4</sub>                | 766.8524 <sup>+2</sup> | y <sub>14</sub> <sup>+2</sup>                                 | 1219.5702               | y <sub>11</sub>                                               | 1664.7066 <sup>+2</sup> | y <sub>30</sub> <sup>+2</sup>                                 | 2859.1887 | b <sub>26</sub>                                 |
| 357.6619 <sup>+2</sup> | b <sub>7</sub> -H <sub>3</sub> PO <sub>4</sub> <sup>+2</sup>  | 812.2934               | b <sub>7</sub>                                                | 1245.0535 <sup>+2</sup> | b <sub>23</sub> -H <sub>3</sub> PO <sub>4</sub> <sup>+2</sup> | 1669.7044 <sup>+2</sup> | b <sub>30</sub> <sup>+2</sup>                                 | 2876.2388 | b <sub>27</sub> -H <sub>3</sub> PO <sub>4</sub> |
| 371.1318 <sup>+2</sup> | b <sub>6</sub> <sup>+2</sup>                                  | 813.3705 <sup>+2</sup> | b <sub>15</sub> -H <sub>3</sub> PO <sub>4</sub> <sup>+2</sup> | 1250.5259 <sup>+2</sup> | b <sub>22</sub> <sup>+2</sup>                                 | 1693.7687 <sup>+2</sup> | MH-H <sub>3</sub> PO <sub>4</sub> <sup>+2</sup>               | 2946.317  | y <sub>27</sub>                                 |
| 377.6958 <sup>+2</sup> | y <sub>6</sub> <sup>+2</sup>                                  | 813.8325 <sup>+2</sup> | b <sub>14</sub> <sup>+2</sup>                                 | 1273.5642 <sup>+2</sup> | b <sub>24</sub> -H <sub>3</sub> PO <sub>4</sub> <sup>+2</sup> | 1723.7105               | b <sub>15</sub>                                               | 2974.2157 | b <sub>27</sub>                                 |
| 406.6504 <sup>+2</sup> | b <sub>7</sub> <sup>+2</sup>                                  | 827.4006               | b <sub>8</sub> -H <sub>3</sub> PO <sub>4</sub>                | 1277.527                | b <sub>11</sub>                                               | 1726.7813               | b <sub>16</sub> -H <sub>3</sub> PO <sub>4</sub>               | 2975.3072 | b <sub>28</sub> -H <sub>3</sub> PO <sub>4</sub> |
| 412.2303               | y <sub>3</sub>                                                | 830.8817 <sup>+2</sup> | y <sub>15</sub> <sup>+2</sup>                                 | 1280.5721 <sup>+2</sup> | y <sub>23</sub> <sup>+2</sup>                                 | 1742.7572 <sup>+2</sup> | MH <sup>+2</sup>                                              | 3033.349  | y <sub>28</sub>                                 |
| 414.2039 <sup>+2</sup> | b <sub>8</sub> -H <sub>3</sub> PO <sub>4</sub> <sup>+2</sup>  | 841.4163               | y <sub>7</sub>                                                | 1280.5978               | b <sub>12</sub> -H <sub>3</sub> PO <sub>4</sub>               | 1761.8038               | y <sub>16</sub>                                               | 3073.2841 | b <sub>28</sub>                                 |
| 421.2118 <sup>+2</sup> | y <sub>7</sub> <sup>+2</sup>                                  | 862.3589 <sup>+2</sup> | b <sub>15</sub> <sup>+2</sup>                                 | 1294.0420 <sup>+2</sup> | b <sub>23</sub> <sup>+2</sup>                                 | 1824.7582               | b <sub>16</sub>                                               | 3112.3661 | b <sub>29</sub> -H <sub>3</sub> PO <sub>4</sub> |
| 441.2205               | b <sub>4</sub> -H <sub>3</sub> PO <sub>4</sub>                | 863.8943 <sup>+2</sup> | b <sub>16</sub> -H <sub>3</sub> PO <sub>4</sub> <sup>+2</sup> | 1306.6022               | y <sub>12</sub>                                               | 1854.8399               | b <sub>17</sub> -H <sub>3</sub> PO <sub>4</sub>               | 3147.392  | y <sub>29</sub>                                 |
| 449.7225 <sup>+2</sup> | y <sub>8</sub> <sup>+2</sup>                                  | 881.4056 <sup>+2</sup> | y <sub>16</sub> <sup>+2</sup>                                 | 1317.0803 <sup>+2</sup> | b <sub>25</sub> -H <sub>3</sub> PO <sub>4</sub> <sup>+2</sup> | 1858.8566               | y <sub>17</sub>                                               | 3210.343  | b <sub>29</sub>                                 |
| 452.1653               | b <sub>3</sub>                                                | 898.4377               | y <sub>8</sub>                                                | 1322.5527 <sup>+2</sup> | b <sub>24</sub> <sup>+2</sup>                                 | 1951.8927               | b <sub>18</sub> -H <sub>3</sub> PO <sub>4</sub>               | 3230.4291 | y <sub>30</sub> -H <sub>3</sub> PO <sub>4</sub> |
| 463.1924 <sup>+2</sup> | b <sub>8</sub> <sup>+2</sup>                                  | 912.8827 <sup>+2</sup> | b <sub>16</sub> <sup>+2</sup>                                 | 1337.1141 <sup>+2</sup> | y <sub>24</sub> <sup>+2</sup>                                 | 1952.8168               | b <sub>17</sub>                                               | 3240.4247 | b <sub>30</sub> -H <sub>3</sub> PO <sub>4</sub> |
| 482.7334 <sup>+2</sup> | b <sub>9</sub> -H <sub>3</sub> PO <sub>4</sub> <sup>+2</sup>  | 925.3775               | b <sub>8</sub>                                                | 1366.0687 <sup>+2</sup> | b <sub>25</sub> <sup>+2</sup>                                 | 1959.9043               | y <sub>18</sub>                                               | 3328.406  | y <sub>30</sub>                                 |
| 493.2385 <sup>+2</sup> | y <sub>9</sub> <sup>+2</sup>                                  | 927.9236 <sup>+2</sup> | b <sub>17</sub> -H <sub>3</sub> PO <sub>4</sub> <sup>+2</sup> | 1372.6327 <sup>+2</sup> | y <sub>25</sub> <sup>+2</sup>                                 | 2049.8696               | b <sub>18</sub>                                               | 3338.4016 | b <sub>30</sub>                                 |
| 511.2987               | y <sub>4</sub>                                                | 929.9319 <sup>+2</sup> | y <sub>17</sub> <sup>+2</sup>                                 | 1378.5747               | b <sub>12</sub>                                               | 2080.9353               | b <sub>19</sub> -H <sub>3</sub> PO <sub>4</sub>               | 3386.5302 | MH-H <sub>3</sub> PO <sub>4</sub>               |
| 531.7218 <sup>+2</sup> | b <sub>9</sub> <sup>+2</sup>                                  | 964.4595               | b <sub>9</sub> -H <sub>3</sub> PO <sub>4</sub>                | 1381.1096 <sup>+2</sup> | b <sub>26</sub> -H <sub>3</sub> PO <sub>4</sub> <sup>+2</sup> | 2106.9397               | y <sub>19</sub>                                               | 3484.5071 | MH                                              |
| 536.7545 <sup>+2</sup> | y <sub>10</sub> <sup>+2</sup>                                 | 976.4500 <sup>+2</sup> | b <sub>18</sub> -H <sub>3</sub> PO <sub>4</sub> <sup>+2</sup> | 1416.1487 <sup>+2</sup> | y <sub>26</sub> <sup>+2</sup>                                 | 2167.9673               | b <sub>20</sub> -H <sub>3</sub> PO <sub>4</sub>               |           |                                                 |
| 539.1974               | b <sub>4</sub>                                                | 976.9120 <sup>+2</sup> | b <sub>17</sub> <sup>+2</sup>                                 | 1427.6332               | b <sub>13</sub> -H <sub>3</sub> PO <sub>4</sub>               | 2178.9122               | b <sub>19</sub>                                               |           |                                                 |
| 546.7627 <sup>+2</sup> | b <sub>10</sub> -H <sub>3</sub> PO <sub>4</sub> <sup>+2</sup> | 980.4558 <sup>+2</sup> | y <sub>18</sub> <sup>+2</sup>                                 | 1430.0980 <sup>+2</sup> | b <sub>26</sub> <sup>+2</sup>                                 | 2207.9874               | y <sub>20</sub>                                               |           |                                                 |



MS/MS Fragmentation of RGsDIDNPTLTVmDISPPSR  
 Found in IPI00513803, Mitogen-activated protein kinase kinase 2

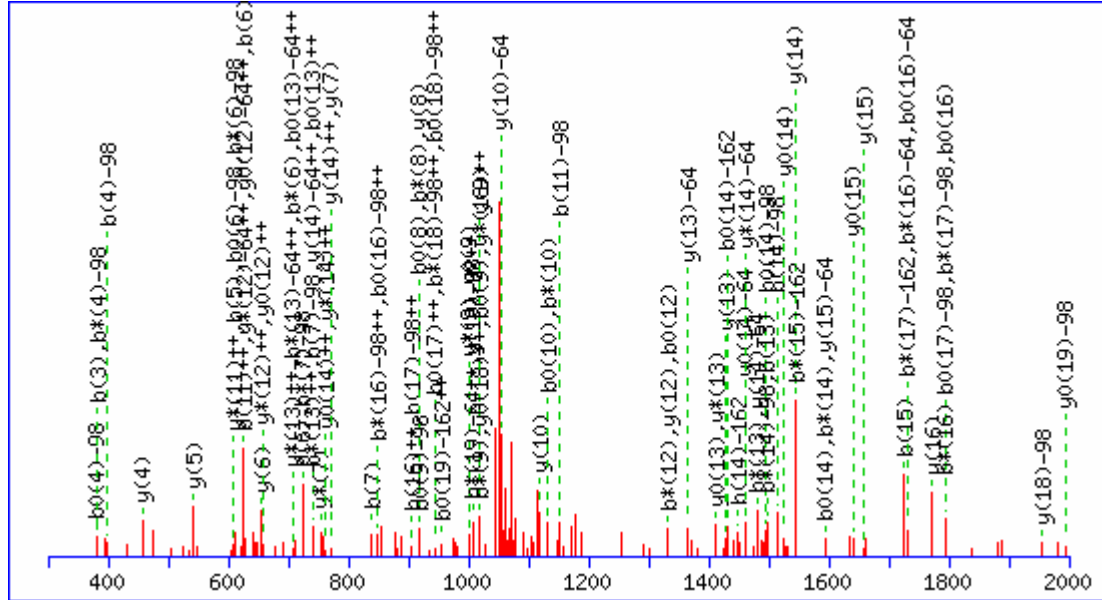

|                        |                                                              |                        |                                                               |                        |                                                               |                         |                                                               |           |                                                 |
|------------------------|--------------------------------------------------------------|------------------------|---------------------------------------------------------------|------------------------|---------------------------------------------------------------|-------------------------|---------------------------------------------------------------|-----------|-------------------------------------------------|
| 88.0631 <sup>+2</sup>  | y <sub>1</sub> <sup>+2</sup>                                 | 419.1961 <sup>+2</sup> | b <sub>8</sub> -H <sub>3</sub> PO <sub>4</sub> <sup>+2</sup>  | 715.3714 <sup>+2</sup> | y <sub>13</sub> <sup>+2</sup>                                 | 997.9780 <sup>+2</sup>  | b <sub>19</sub> -H <sub>3</sub> PO <sub>4</sub> <sup>+2</sup> | 1611.672  | b <sub>14</sub>                                 |
| 107.5686 <sup>+2</sup> | b <sub>2</sub> <sup>+2</sup>                                 | 419.6582 <sup>+2</sup> | b <sub>7</sub> <sup>+2</sup>                                  | 724.2662               | b <sub>6</sub>                                                | 1003.4505 <sup>+2</sup> | b <sub>18</sub> <sup>+2</sup>                                 | 1626.7792 | b <sub>15</sub> -H <sub>3</sub> PO <sub>4</sub> |
| 131.5791 <sup>+2</sup> | y <sub>2</sub> <sup>+2</sup>                                 | 456.2565               | y <sub>4</sub>                                                | 740.3322               | b <sub>7</sub> -H <sub>3</sub> PO <sub>4</sub>                | 1006.9833 <sup>+2</sup> | y <sub>19</sub> -H <sub>3</sub> PO <sub>4</sub> <sup>+2</sup> | 1658.8054 | y <sub>15</sub>                                 |
| 142.0793 <sup>+2</sup> | b <sub>3</sub> -H <sub>3</sub> PO <sub>4</sub> <sup>+2</sup> | 459.7211 <sup>+2</sup> | y <sub>8</sub> <sup>+2</sup>                                  | 748.8262 <sup>+2</sup> | b <sub>13</sub> <sup>+2</sup>                                 | 1017.5034               | y <sub>9</sub>                                                | 1713.8112 | b <sub>16</sub> -H <sub>3</sub> PO <sub>4</sub> |
| 175.119                | y <sub>1</sub>                                               | 468.1846 <sup>+2</sup> | b <sub>8</sub> <sup>+2</sup>                                  | 757.3512 <sup>+2</sup> | b <sub>14</sub> -H <sub>3</sub> PO <sub>4</sub> <sup>+2</sup> | 1027.4610 <sup>+2</sup> | y <sub>18</sub> <sup>+2</sup>                                 | 1724.7561 | b <sub>15</sub>                                 |
| 180.1055 <sup>+2</sup> | y <sub>3</sub> <sup>+2</sup>                                 | 469.7200 <sup>+2</sup> | b <sub>9</sub> -H <sub>3</sub> PO <sub>4</sub> <sup>+2</sup>  | 771.3995               | y <sub>7</sub>                                                | 1036.4095               | b <sub>9</sub>                                                | 1771.8895 | y <sub>16</sub>                                 |
| 191.0677 <sup>+2</sup> | b <sub>3</sub> <sup>+2</sup>                                 | 496.1552               | b <sub>4</sub>                                                | 772.3929 <sup>+2</sup> | y <sub>14</sub> <sup>+2</sup>                                 | 1046.9665 <sup>+2</sup> | b <sub>19</sub> <sup>+2</sup>                                 | 1810.864  | b <sub>17</sub> -H <sub>3</sub> PO <sub>4</sub> |
| 199.5928 <sup>+2</sup> | b <sub>4</sub> -H <sub>3</sub> PO <sub>4</sub> <sup>+2</sup> | 509.2553 <sup>+2</sup> | y <sub>9</sub> <sup>+2</sup>                                  | 806.3397 <sup>+2</sup> | b <sub>14</sub> <sup>+2</sup>                                 | 1051.5167               | b <sub>10</sub> -H <sub>3</sub> PO <sub>4</sub>               | 1811.7881 | b <sub>16</sub>                                 |
| 214.1299               | b <sub>2</sub>                                               | 511.2623               | b <sub>5</sub> -H <sub>3</sub> PO <sub>4</sub>                | 813.8932 <sup>+2</sup> | b <sub>15</sub> -H <sub>3</sub> PO <sub>4</sub> <sup>+2</sup> | 1055.9718 <sup>+2</sup> | y <sub>19</sub> <sup>+2</sup>                                 | 1886.9164 | y <sub>17</sub>                                 |
| 228.6319 <sup>+2</sup> | y <sub>4</sub> <sup>+2</sup>                                 | 518.7084 <sup>+2</sup> | b <sub>9</sub> <sup>+2</sup>                                  | 829.9063 <sup>+2</sup> | y <sub>15</sub> <sup>+2</sup>                                 | 1085.0339 <sup>+2</sup> | MH-H <sub>3</sub> PO <sub>4</sub> <sup>+2</sup>               | 1907.9168 | b <sub>18</sub> -H <sub>3</sub> PO <sub>4</sub> |
| 248.5812 <sup>+2</sup> | b <sub>4</sub> <sup>+2</sup>                                 | 526.2620 <sup>+2</sup> | b <sub>10</sub> -H <sub>3</sub> PO <sub>4</sub> <sup>+2</sup> | 837.385                | b <sub>8</sub> -H <sub>3</sub> PO <sub>4</sub>                | 1118.551                | y <sub>10</sub>                                               | 1908.8409 | b <sub>17</sub>                                 |
| 256.1348 <sup>+2</sup> | b <sub>5</sub> -H <sub>3</sub> PO <sub>4</sub> <sup>+2</sup> | 543.2885               | y <sub>5</sub>                                                | 838.3091               | b <sub>7</sub>                                                | 1134.0223 <sup>+2</sup> | MH <sup>+2</sup>                                              | 1955.9379 | y <sub>18</sub> -H <sub>3</sub> PO <sub>4</sub> |
| 262.151                | y <sub>2</sub>                                               | 559.7792 <sup>+2</sup> | y <sub>10</sub> <sup>+2</sup>                                 | 857.4093 <sup>+2</sup> | b <sub>16</sub> -H <sub>3</sub> PO <sub>4</sub> <sup>+2</sup> | 1149.4936               | b <sub>10</sub>                                               | 1994.9488 | b <sub>19</sub> -H <sub>3</sub> PO <sub>4</sub> |
| 272.1479 <sup>+2</sup> | y <sub>5</sub> <sup>+2</sup>                                 | 575.2504 <sup>+2</sup> | b <sub>10</sub> <sup>+2</sup>                                 | 862.8817 <sup>+2</sup> | b <sub>15</sub> <sup>+2</sup>                                 | 1152.5644               | b <sub>11</sub> -H <sub>3</sub> PO <sub>4</sub>               | 2005.8936 | b <sub>18</sub>                                 |
| 283.1513               | b <sub>3</sub> -H <sub>3</sub> PO <sub>4</sub>               | 576.7858 <sup>+2</sup> | b <sub>11</sub> -H <sub>3</sub> PO <sub>4</sub> <sup>+2</sup> | 886.4484 <sup>+2</sup> | y <sub>16</sub> <sup>+2</sup>                                 | 1231.6351               | y <sub>11</sub>                                               | 2012.9593 | y <sub>19</sub> -H <sub>3</sub> PO <sub>4</sub> |
| 305.1232 <sup>+2</sup> | b <sub>5</sub> <sup>+2</sup>                                 | 609.2392               | b <sub>5</sub>                                                | 905.9356 <sup>+2</sup> | b <sub>17</sub> -H <sub>3</sub> PO <sub>4</sub> <sup>+2</sup> | 1250.5413               | b <sub>11</sub>                                               | 2053.9148 | y <sub>18</sub>                                 |
| 313.6483 <sup>+2</sup> | b <sub>6</sub> -H <sub>3</sub> PO <sub>4</sub> <sup>+2</sup> | 616.3212 <sup>+2</sup> | y <sub>11</sub> <sup>+2</sup>                                 | 906.3977 <sup>+2</sup> | b <sub>16</sub> <sup>+2</sup>                                 | 1251.6328               | b <sub>12</sub> -H <sub>3</sub> PO <sub>4</sub>               | 2092.9257 | b <sub>19</sub>                                 |
| 328.6899 <sup>+2</sup> | y <sub>6</sub> <sup>+2</sup>                                 | 625.7743 <sup>+2</sup> | b <sub>11</sub> <sup>+2</sup>                                 | 918.4349               | y <sub>8</sub>                                                | 1332.6828               | y <sub>12</sub>                                               | 2110.9362 | y <sub>19</sub>                                 |
| 359.2037               | y <sub>3</sub>                                               | 626.2893               | b <sub>6</sub> -H <sub>3</sub> PO <sub>4</sub>                | 935.3619               | b <sub>8</sub>                                                | 1349.6097               | b <sub>12</sub>                                               | 2169.0605 | MH-H <sub>3</sub> PO <sub>4</sub>               |
| 362.6367 <sup>+2</sup> | b <sub>6</sub> <sup>+2</sup>                                 | 626.3200 <sup>+2</sup> | b <sub>12</sub> -H <sub>3</sub> PO <sub>4</sub> <sup>+2</sup> | 938.4326               | b <sub>9</sub> -H <sub>3</sub> PO <sub>4</sub>                | 1398.6682               | b <sub>13</sub> -H <sub>3</sub> PO <sub>4</sub>               | 2267.0374 | MH                                              |
| 370.6697 <sup>+2</sup> | b <sub>7</sub> -H <sub>3</sub> PO <sub>4</sub> <sup>+2</sup> | 656.3726               | y <sub>6</sub>                                                | 943.9618 <sup>+2</sup> | y <sub>17</sub> <sup>+2</sup>                                 | 1429.7355               | y <sub>13</sub>                                               |           |                                                 |
| 381.1282               | b <sub>3</sub>                                               | 666.8450 <sup>+2</sup> | y <sub>12</sub> <sup>+2</sup>                                 | 954.4620 <sup>+2</sup> | b <sub>18</sub> -H <sub>3</sub> PO <sub>4</sub> <sup>+2</sup> | 1496.6451               | b <sub>13</sub>                                               |           |                                                 |
| 386.2034 <sup>+2</sup> | y <sub>7</sub> <sup>+2</sup>                                 | 675.3085 <sup>+2</sup> | b <sub>12</sub> <sup>+2</sup>                                 | 954.9241 <sup>+2</sup> | b <sub>17</sub> <sup>+2</sup>                                 | 1513.6951               | b <sub>14</sub> -H <sub>3</sub> PO <sub>4</sub>               |           |                                                 |
| 398.1783               | b <sub>4</sub> -H <sub>3</sub> PO <sub>4</sub>               | 699.8377 <sup>+2</sup> | b <sub>13</sub> -H <sub>3</sub> PO <sub>4</sub> <sup>+2</sup> | 978.4726 <sup>+2</sup> | y <sub>18</sub> -H <sub>3</sub> PO <sub>4</sub> <sup>+2</sup> | 1543.7785               | y <sub>14</sub>                                               |           |                                                 |

MS/MS Fragmentation of HsLEEGLDmVNR  
 Found in IPI00749302, Hypothetical protein DKFzP686L20116

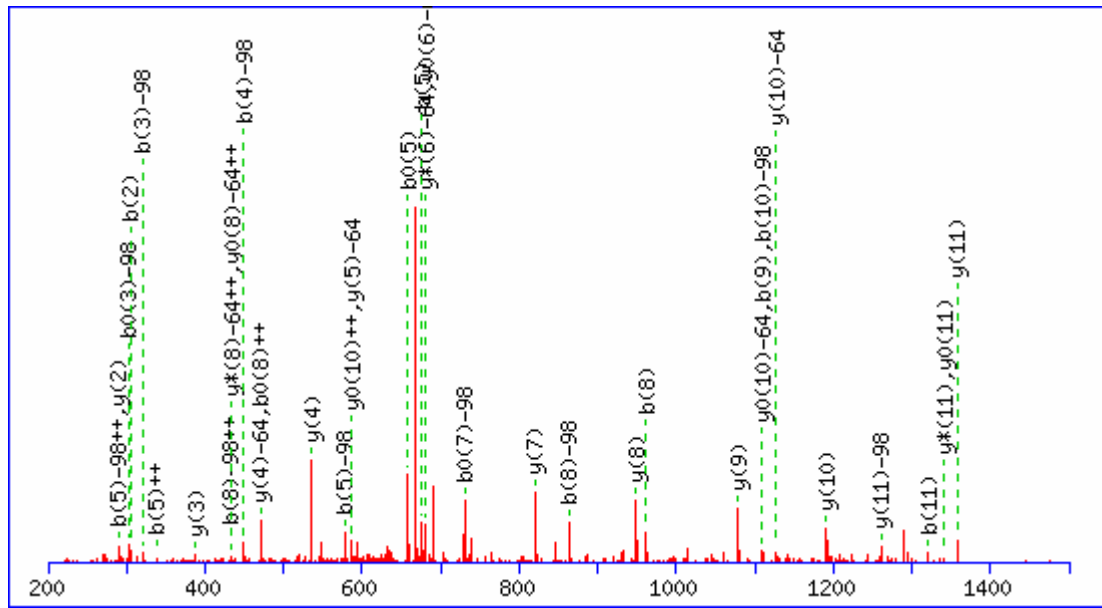

|                        |                                                              |                        |                                                              |                        |                                                               |                        |                                                 |           |                                                 |
|------------------------|--------------------------------------------------------------|------------------------|--------------------------------------------------------------|------------------------|---------------------------------------------------------------|------------------------|-------------------------------------------------|-----------|-------------------------------------------------|
| 88.0631 <sup>+2</sup>  | y <sub>1</sub> <sup>+2</sup>                                 | 305.0645               | b <sub>2</sub>                                               | 475.2240 <sup>+2</sup> | y <sub>8</sub> <sup>+2</sup>                                  | 650.2926               | y <sub>5</sub>                                  | 1010.4248 | b <sub>9</sub> -H <sub>3</sub> PO <sub>4</sub>  |
| 104.0475 <sup>+2</sup> | b <sub>2</sub> -H <sub>3</sub> PO <sub>4</sub> <sup>+2</sup> | 318.1428 <sup>+2</sup> | b <sub>6</sub> -H <sub>3</sub> PO <sub>4</sub> <sup>+2</sup> | 481.1868 <sup>+2</sup> | b <sub>8</sub> <sup>+2</sup>                                  | 661.2601 <sup>+2</sup> | b <sub>11</sub> <sup>+2</sup>                   | 1078.4833 | y <sub>9</sub>                                  |
| 145.0846 <sup>+2</sup> | y <sub>2</sub> <sup>+2</sup>                                 | 320.1717               | b <sub>3</sub> -H <sub>3</sub> PO <sub>4</sub>               | 505.7160 <sup>+2</sup> | b <sub>9</sub> -H <sub>3</sub> PO <sub>4</sub> <sup>+2</sup>  | 676.2338               | b <sub>5</sub>                                  | 1108.4017 | b <sub>9</sub>                                  |
| 153.0359 <sup>+2</sup> | b <sub>2</sub> <sup>+2</sup>                                 | 325.6500 <sup>+2</sup> | y <sub>5</sub> <sup>+2</sup>                                 | 535.2657               | y <sub>4</sub>                                                | 679.7865 <sup>+2</sup> | y <sub>11</sub> <sup>+2</sup>                   | 1109.4932 | b <sub>10</sub> -H <sub>3</sub> PO <sub>4</sub> |
| 160.5895 <sup>+2</sup> | b <sub>3</sub> -H <sub>3</sub> PO <sub>4</sub> <sup>+2</sup> | 338.6205 <sup>+2</sup> | b <sub>5</sub> <sup>+2</sup>                                 | 539.7453 <sup>+2</sup> | y <sub>9</sub> <sup>+2</sup>                                  | 699.3275 <sup>+2</sup> | MH-H <sub>3</sub> PO <sub>4</sub> <sup>+2</sup> | 1191.5674 | y <sub>10</sub>                                 |
| 175.119                | y <sub>1</sub>                                               | 367.1313 <sup>+2</sup> | b <sub>6</sub> <sup>+2</sup>                                 | 547.1912               | b <sub>4</sub>                                                | 733.2553               | b <sub>6</sub>                                  | 1207.4701 | b <sub>10</sub>                                 |
| 194.6188 <sup>+2</sup> | y <sub>3</sub> <sup>+2</sup>                                 | 374.6849 <sup>+2</sup> | b <sub>7</sub> -H <sub>3</sub> PO <sub>4</sub> <sup>+2</sup> | 554.7045 <sup>+2</sup> | b <sub>9</sub> <sup>+2</sup>                                  | 748.3160 <sup>+2</sup> | MH <sup>+2</sup>                                | 1223.5361 | b <sub>11</sub> -H <sub>3</sub> PO <sub>4</sub> |
| 207.0877               | b <sub>2</sub> -H <sub>3</sub> PO <sub>4</sub>               | 382.1920 <sup>+2</sup> | y <sub>6</sub> <sup>+2</sup>                                 | 555.2502 <sup>+2</sup> | b <sub>10</sub> -H <sub>3</sub> PO <sub>4</sub> <sup>+2</sup> | 748.3624               | b <sub>7</sub> -H <sub>3</sub> PO <sub>4</sub>  | 1260.5889 | y <sub>11</sub> -H <sub>3</sub> PO <sub>4</sub> |
| 209.5779 <sup>+2</sup> | b <sub>3</sub> <sup>+2</sup>                                 | 388.2303               | y <sub>3</sub>                                               | 578.2569               | b <sub>5</sub> -H <sub>3</sub> PO <sub>4</sub>                | 763.3767               | y <sub>6</sub>                                  | 1321.513  | b <sub>11</sub>                                 |
| 225.1108 <sup>+2</sup> | b <sub>4</sub> -H <sub>3</sub> PO <sub>4</sub> <sup>+2</sup> | 410.7027 <sup>+2</sup> | y <sub>7</sub> <sup>+2</sup>                                 | 596.2873 <sup>+2</sup> | y <sub>10</sub> <sup>+2</sup>                                 | 820.3982               | y <sub>7</sub>                                  | 1358.5658 | y <sub>11</sub>                                 |
| 268.1365 <sup>+2</sup> | y <sub>4</sub> <sup>+2</sup>                                 | 418.1486               | b <sub>3</sub>                                               | 604.2387 <sup>+2</sup> | b <sub>10</sub> <sup>+2</sup>                                 | 846.3393               | b <sub>7</sub>                                  | 1397.6478 | MH-H <sub>3</sub> PO <sub>4</sub>               |
| 274.0992 <sup>+2</sup> | b <sub>4</sub> <sup>+2</sup>                                 | 423.6733 <sup>+2</sup> | b <sub>7</sub> <sup>+2</sup>                                 | 612.2717 <sup>+2</sup> | b <sub>11</sub> -H <sub>3</sub> PO <sub>4</sub> <sup>+2</sup> | 863.3894               | b <sub>8</sub> -H <sub>3</sub> PO <sub>4</sub>  | 1495.6247 | MH                                              |
| 289.1619               | y <sub>2</sub>                                               | 432.1983 <sup>+2</sup> | b <sub>8</sub> -H <sub>3</sub> PO <sub>4</sub> <sup>+2</sup> | 630.7981 <sup>+2</sup> | y <sub>11</sub> -H <sub>3</sub> PO <sub>4</sub> <sup>+2</sup> | 949.4408               | y <sub>8</sub>                                  |           |                                                 |
| 289.6321 <sup>+2</sup> | b <sub>5</sub> -H <sub>3</sub> PO <sub>4</sub> <sup>+2</sup> | 449.2143               | b <sub>4</sub> -H <sub>3</sub> PO <sub>4</sub>               | 635.2784               | b <sub>6</sub> -H <sub>3</sub> PO <sub>4</sub>                | 961.3663               | b <sub>8</sub>                                  |           |                                                 |

MS/MS Fragmentation of GSATAEsPVACSNCSFILmDDLSPK  
 Found in IPI00749302, Hypothetical protein DKFZp686L20116

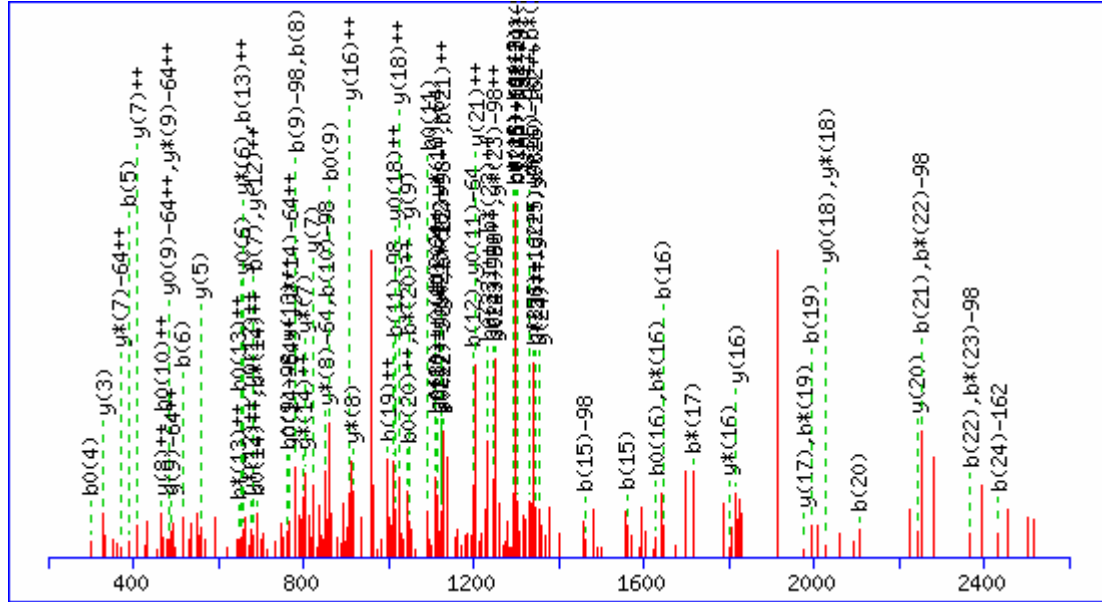

|                        |                                                |                         |                                                               |                         |                                                               |           |                                                 |           |                                                 |
|------------------------|------------------------------------------------|-------------------------|---------------------------------------------------------------|-------------------------|---------------------------------------------------------------|-----------|-------------------------------------------------|-----------|-------------------------------------------------|
| 74.0600 <sup>+2</sup>  | y <sub>1</sub> <sup>+2</sup>                   | 683.2995                | b <sub>8</sub> -H <sub>3</sub> PO <sub>4</sub>                | 1141.4231               | b <sub>12</sub>                                               | 1445.5073 | b <sub>15</sub>                                 | 2271.9203 | b <sub>23</sub> -H <sub>3</sub> PO <sub>4</sub> |
| 122.5864 <sup>+2</sup> | y <sub>2</sub> <sup>+2</sup>                   | 684.2236                | b <sub>7</sub>                                                | 1148.9804 <sup>+2</sup> | y <sub>21</sub> <sup>+2</sup>                                 | 1471.6807 | y <sub>13</sub>                                 | 2296.9535 | y <sub>21</sub>                                 |
| 145.0608               | b <sub>2</sub>                                 | 684.8394 <sup>+2</sup>  | y <sub>12</sub> <sup>+2</sup>                                 | 1157.4892               | b <sub>13</sub> -H <sub>3</sub> PO <sub>4</sub>               | 1521.5944 | b <sub>17</sub> -H <sub>3</sub> PO <sub>4</sub> | 2328.0192 | y <sub>22</sub> -H <sub>3</sub> PO <sub>4</sub> |
| 147.1128               | y <sub>1</sub>                                 | 736.3440 <sup>+2</sup>  | y <sub>13</sub> <sup>+2</sup>                                 | 1164.5133 <sup>+2</sup> | y <sub>22</sub> -H <sub>3</sub> PO <sub>4</sub> <sup>+2</sup> | 1532.5393 | b <sub>16</sub>                                 | 2369.8972 | b <sub>23</sub>                                 |
| 166.1024 <sup>+2</sup> | y <sub>3</sub> <sup>+2</sup>                   | 779.8600 <sup>+2</sup>  | y <sub>14</sub> <sup>+2</sup>                                 | 1194.6075               | y <sub>10</sub>                                               | 1558.7128 | y <sub>14</sub>                                 | 2385.0043 | b <sub>24</sub> -H <sub>3</sub> PO <sub>4</sub> |
| 216.0979               | b <sub>3</sub>                                 | 781.2764                | b <sub>8</sub>                                                | 1200.0318 <sup>+2</sup> | y <sub>23</sub> -H <sub>3</sub> PO <sub>4</sub> <sup>+2</sup> | 1619.5713 | b <sub>17</sub>                                 | 2399.0564 | y <sub>23</sub> -H <sub>3</sub> PO <sub>4</sub> |
| 222.6445 <sup>+2</sup> | y <sub>4</sub> <sup>+2</sup>                   | 782.3679                | b <sub>9</sub> -H <sub>3</sub> PO <sub>4</sub>                | 1213.5017 <sup>+2</sup> | y <sub>22</sub> <sup>+2</sup>                                 | 1668.6628 | b <sub>18</sub> -H <sub>3</sub> PO <sub>4</sub> | 2425.9961 | y <sub>22</sub>                                 |
| 244.1656               | y <sub>2</sub>                                 | 821.3709                | y <sub>7</sub>                                                | 1244.5212               | b <sub>14</sub> -H <sub>3</sub> PO <sub>4</sub>               | 1672.7557 | y <sub>15</sub>                                 | 2472.0364 | b <sub>25</sub> -H <sub>3</sub> PO <sub>4</sub> |
| 280.1579 <sup>+2</sup> | y <sub>5</sub> <sup>+2</sup>                   | 836.8815 <sup>+2</sup>  | y <sub>15</sub> <sup>+2</sup>                                 | 1249.0203 <sup>+2</sup> | y <sub>23</sub> <sup>+2</sup>                                 | 1759.7877 | y <sub>16</sub>                                 | 2482.9812 | b <sub>24</sub>                                 |
| 317.1456               | b <sub>4</sub>                                 | 853.405                 | b <sub>10</sub> -H <sub>3</sub> PO <sub>4</sub>               | 1250.5557 <sup>+2</sup> | y <sub>24</sub> -H <sub>3</sub> PO <sub>4</sub> <sup>+2</sup> | 1766.6397 | b <sub>18</sub>                                 | 2497.0333 | y <sub>23</sub>                                 |
| 331.1976               | y <sub>3</sub>                                 | 880.3448                | b <sub>9</sub>                                                | 1255.4661               | b <sub>13</sub>                                               | 1781.7469 | b <sub>19</sub> -H <sub>3</sub> PO <sub>4</sub> | 2500.104  | y <sub>24</sub> -H <sub>3</sub> PO <sub>4</sub> |
| 337.6714 <sup>+2</sup> | y <sub>6</sub> <sup>+2</sup>                   | 880.3975 <sup>+2</sup>  | y <sub>16</sub> <sup>+2</sup>                                 | 1281.6395               | y <sub>11</sub>                                               | 1862.7969 | y <sub>17</sub>                                 | 2569.0891 | b <sub>26</sub> -H <sub>3</sub> PO <sub>4</sub> |
| 388.1827               | b <sub>5</sub>                                 | 931.9021 <sup>+2</sup>  | y <sub>17</sub> <sup>+2</sup>                                 | 1286.0742 <sup>+2</sup> | y <sub>25</sub> -H <sub>3</sub> PO <sub>4</sub> <sup>+2</sup> | 1879.7238 | b <sub>19</sub>                                 | 2570.0132 | b <sub>25</sub>                                 |
| 411.1891 <sup>+2</sup> | y <sub>7</sub> <sup>+2</sup>                   | 934.455                 | y <sub>8</sub>                                                | 1299.5441 <sup>+2</sup> | y <sub>24</sub> <sup>+2</sup>                                 | 1894.831  | b <sub>20</sub> -H <sub>3</sub> PO <sub>4</sub> | 2571.1412 | y <sub>25</sub> -H <sub>3</sub> PO <sub>4</sub> |
| 444.2817               | y <sub>4</sub>                                 | 951.3819                | b <sub>10</sub>                                               | 1329.5902 <sup>+2</sup> | y <sub>26</sub> -H <sub>3</sub> PO <sub>4</sub> <sup>+2</sup> | 1933.834  | y <sub>18</sub>                                 | 2598.0809 | y <sub>24</sub>                                 |
| 467.7311 <sup>+2</sup> | y <sub>8</sub> <sup>+2</sup>                   | 956.4142                | b <sub>11</sub> -H <sub>3</sub> PO <sub>4</sub>               | 1335.0627 <sup>+2</sup> | y <sub>25</sub> <sup>+2</sup>                                 | 1992.8079 | b <sub>20</sub>                                 | 2658.1732 | y <sub>26</sub> -H <sub>3</sub> PO <sub>4</sub> |
| 517.2253               | b <sub>6</sub>                                 | 967.4206 <sup>+2</sup>  | y <sub>18</sub> <sup>+2</sup>                                 | 1342.4981               | b <sub>14</sub>                                               | 2032.9024 | y <sub>19</sub>                                 | 2667.066  | b <sub>26</sub>                                 |
| 524.2732 <sup>+2</sup> | y <sub>9</sub> <sup>+2</sup>                   | 1016.9549 <sup>+2</sup> | y <sub>19</sub> <sup>+2</sup>                                 | 1347.5304               | b <sub>15</sub> -H <sub>3</sub> PO <sub>4</sub>               | 2041.8664 | b <sub>21</sub> -H <sub>3</sub> PO <sub>4</sub> | 2669.118  | y <sub>25</sub>                                 |
| 559.3086               | y <sub>5</sub>                                 | 1043.4462               | b <sub>12</sub> -H <sub>3</sub> PO <sub>4</sub>               | 1358.1010 <sup>+2</sup> | MH-H <sub>3</sub> PO <sub>4</sub> <sup>+2</sup>               | 2129.9552 | y <sub>20</sub>                                 | 2715.1946 | MH-H <sub>3</sub> PO <sub>4</sub>               |
| 586.2467               | b <sub>7</sub> -H <sub>3</sub> PO <sub>4</sub> | 1047.5391               | y <sub>9</sub>                                                | 1368.6715               | y <sub>12</sub>                                               | 2139.8433 | b <sub>21</sub>                                 | 2756.1501 | y <sub>26</sub>                                 |
| 597.8074 <sup>+2</sup> | y <sub>10</sub> <sup>+2</sup>                  | 1054.3911               | b <sub>11</sub>                                               | 1378.5787 <sup>+2</sup> | y <sub>26</sub> <sup>+2</sup>                                 | 2156.8933 | b <sub>22</sub> -H <sub>3</sub> PO <sub>4</sub> | 2813.1715 | MH                                              |
| 641.3234 <sup>+2</sup> | y <sub>11</sub> <sup>+2</sup>                  | 1065.4812 <sup>+2</sup> | y <sub>20</sub> <sup>+2</sup>                                 | 1407.0894 <sup>+2</sup> | MH <sup>+2</sup>                                              | 2198.9767 | y <sub>21</sub> -H <sub>3</sub> PO <sub>4</sub> |           |                                                 |
| 674.3355               | y <sub>6</sub>                                 | 1099.9920 <sup>+2</sup> | y <sub>21</sub> -H <sub>3</sub> PO <sub>4</sub> <sup>+2</sup> | 1434.5624               | b <sub>16</sub> -H <sub>3</sub> PO <sub>4</sub>               | 2254.8702 | b <sub>22</sub>                                 |           |                                                 |

MS/MS Fragmentation of mSsHTETSSFLQTLTGR  
 Found in IPI00183572, Isoform 2 of Deducator of cytokinesis protein 7

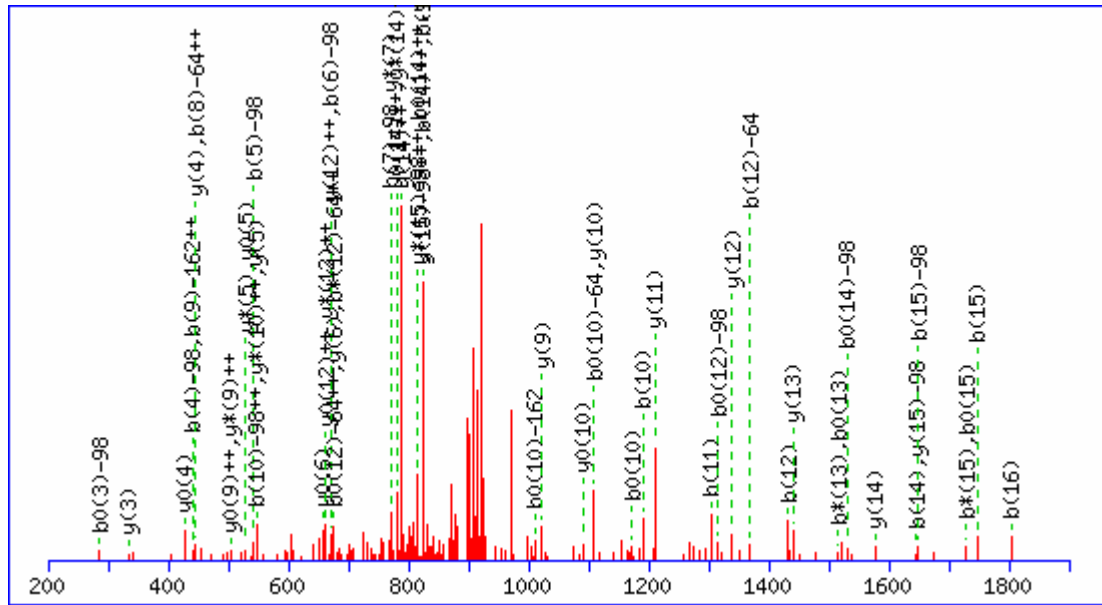

|                        |                                                              |                        |                                                               |                        |                                                               |                        |                                                               |           |                                                 |
|------------------------|--------------------------------------------------------------|------------------------|---------------------------------------------------------------|------------------------|---------------------------------------------------------------|------------------------|---------------------------------------------------------------|-----------|-------------------------------------------------|
| 88.0631 <sup>+2</sup>  | y <sub>1</sub> <sup>+2</sup>                                 | 402.0731               | b <sub>3</sub>                                                | 652.7469 <sup>+2</sup> | b <sub>11</sub> <sup>+2</sup>                                 | 867.4263 <sup>+2</sup> | y <sub>16</sub> -H <sub>3</sub> PO <sub>4</sub> <sup>+2</sup> | 1334.5681 | b <sub>12</sub> -H <sub>3</sub> PO <sub>4</sub> |
| 116.5738 <sup>+2</sup> | y <sub>2</sub> <sup>+2</sup>                                 | 430.1662 <sup>+2</sup> | b <sub>8</sub> -H <sub>3</sub> PO <sub>4</sub> <sup>+2</sup>  | 667.7877 <sup>+2</sup> | b <sub>12</sub> -H <sub>3</sub> PO <sub>4</sub> <sup>+2</sup> | 870.2699               | b <sub>7</sub>                                                | 1339.6852 | y <sub>12</sub>                                 |
| 167.0977 <sup>+2</sup> | y <sub>3</sub> <sup>+2</sup>                                 | 435.6386 <sup>+2</sup> | b <sub>7</sub> <sup>+2</sup>                                  | 670.3462 <sup>+2</sup> | y <sub>12</sub> <sup>+2</sup>                                 | 872.8987 <sup>+2</sup> | y <sub>15</sub> <sup>+2</sup>                                 | 1432.545  | b <sub>12</sub>                                 |
| 175.119                | y <sub>1</sub>                                               | 441.1551               | b <sub>4</sub> -H <sub>3</sub> PO <sub>4</sub>                | 671.2454               | b <sub>6</sub> -H <sub>3</sub> PO <sub>4</sub>                | 874.3659 <sup>+2</sup> | b <sub>15</sub> <sup>+2</sup>                                 | 1435.6158 | b <sub>13</sub> -H <sub>3</sub> PO <sub>4</sub> |
| 221.0812 <sup>+2</sup> | b <sub>4</sub> -H <sub>3</sub> PO <sub>4</sub> <sup>+2</sup> | 446.2722               | y <sub>4</sub>                                                | 675.3784               | y <sub>6</sub>                                                | 902.8766 <sup>+2</sup> | b <sub>16</sub> <sup>+2</sup>                                 | 1440.7329 | y <sub>13</sub>                                 |
| 223.6397 <sup>+2</sup> | y <sub>4</sub> <sup>+2</sup>                                 | 468.2691 <sup>+2</sup> | y <sub>8</sub> <sup>+2</sup>                                  | 716.7762 <sup>+2</sup> | b <sub>12</sub> <sup>+2</sup>                                 | 916.4147 <sup>+2</sup> | y <sub>16</sub> <sup>+2</sup>                                 | 1533.5927 | b <sub>13</sub>                                 |
| 232.1404               | y <sub>2</sub>                                               | 473.6822 <sup>+2</sup> | b <sub>9</sub> -H <sub>3</sub> PO <sub>4</sub> <sup>+2</sup>  | 718.3115 <sup>+2</sup> | b <sub>13</sub> -H <sub>3</sub> PO <sub>4</sub> <sup>+2</sup> | 935.5309               | y <sub>8</sub>                                                | 1548.6999 | b <sub>14</sub> -H <sub>3</sub> PO <sub>4</sub> |
| 235.0747               | b <sub>2</sub>                                               | 479.1546 <sup>+2</sup> | b <sub>8</sub> <sup>+2</sup>                                  | 720.8701 <sup>+2</sup> | y <sub>13</sub> <sup>+2</sup>                                 | 940.9440 <sup>+2</sup> | MH-H <sub>3</sub> PO <sub>4</sub> <sup>+2</sup>               | 1577.7918 | y <sub>14</sub>                                 |
| 270.0696 <sup>+2</sup> | b <sub>4</sub> <sup>+2</sup>                                 | 511.7851 <sup>+2</sup> | y <sub>9</sub> <sup>+2</sup>                                  | 767.3000 <sup>+2</sup> | b <sub>13</sub> <sup>+2</sup>                                 | 946.3571               | b <sub>9</sub> -H <sub>3</sub> PO <sub>4</sub>                | 1646.6768 | b <sub>14</sub>                                 |
| 271.6050 <sup>+2</sup> | b <sub>5</sub> -H <sub>3</sub> PO <sub>4</sub> <sup>+2</sup> | 522.6706 <sup>+2</sup> | b <sub>9</sub> <sup>+2</sup>                                  | 769.2222               | b <sub>6</sub>                                                | 957.302                | b <sub>8</sub>                                                | 1646.8133 | y <sub>15</sub> -H <sub>3</sub> PO <sub>4</sub> |
| 274.1636 <sup>+2</sup> | y <sub>5</sub> <sup>+2</sup>                                 | 539.132                | b <sub>4</sub>                                                | 772.293                | b <sub>7</sub> -H <sub>3</sub> PO <sub>4</sub>                | 989.9324 <sup>+2</sup> | MH <sup>+2</sup>                                              | 1649.7476 | b <sub>15</sub> -H <sub>3</sub> PO <sub>4</sub> |
| 304.0962               | b <sub>3</sub> -H <sub>3</sub> PO <sub>4</sub>               | 542.2028               | b <sub>5</sub> -H <sub>3</sub> PO <sub>4</sub>                | 774.8536 <sup>+2</sup> | b <sub>14</sub> -H <sub>3</sub> PO <sub>4</sub> <sup>+2</sup> | 1022.5629              | y <sub>9</sub>                                                | 1706.769  | b <sub>16</sub> -H <sub>3</sub> PO <sub>4</sub> |
| 320.5935 <sup>+2</sup> | b <sub>5</sub> <sup>+2</sup>                                 | 547.2164 <sup>+2</sup> | b <sub>10</sub> -H <sub>3</sub> PO <sub>4</sub> <sup>+2</sup> | 788.4625               | y <sub>7</sub>                                                | 1044.334               | b <sub>9</sub>                                                | 1733.8453 | y <sub>16</sub> -H <sub>3</sub> PO <sub>4</sub> |
| 333.1881               | y <sub>3</sub>                                               | 547.3198               | y <sub>5</sub>                                                | 789.3995 <sup>+2</sup> | y <sub>14</sub> <sup>+2</sup>                                 | 1093.4255              | b <sub>10</sub> -H <sub>3</sub> PO <sub>4</sub>               | 1744.7902 | y <sub>15</sub>                                 |
| 336.1263 <sup>+2</sup> | b <sub>6</sub> -H <sub>3</sub> PO <sub>4</sub> <sup>+2</sup> | 555.3011 <sup>+2</sup> | y <sub>10</sub> <sup>+2</sup>                                 | 823.8420 <sup>+2</sup> | b <sub>14</sub> <sup>+2</sup>                                 | 1109.5949              | y <sub>10</sub>                                               | 1747.7245 | b <sub>15</sub>                                 |
| 338.1928 <sup>+2</sup> | y <sub>6</sub> <sup>+2</sup>                                 | 596.2048 <sup>+2</sup> | b <sub>10</sub> <sup>+2</sup>                                 | 823.9103 <sup>+2</sup> | y <sub>15</sub> -H <sub>3</sub> PO <sub>4</sub> <sup>+2</sup> | 1191.4024              | b <sub>10</sub>                                               | 1804.7459 | b <sub>16</sub>                                 |
| 385.1148 <sup>+2</sup> | b <sub>6</sub> <sup>+2</sup>                                 | 603.7584 <sup>+2</sup> | b <sub>11</sub> -H <sub>3</sub> PO <sub>4</sub> <sup>+2</sup> | 825.3774 <sup>+2</sup> | b <sub>15</sub> -H <sub>3</sub> PO <sub>4</sub> <sup>+2</sup> | 1206.5096              | b <sub>11</sub> -H <sub>3</sub> PO <sub>4</sub>               | 1831.8222 | y <sub>16</sub>                                 |
| 386.6502 <sup>+2</sup> | b <sub>7</sub> -H <sub>3</sub> PO <sub>4</sub> <sup>+2</sup> | 605.8250 <sup>+2</sup> | y <sub>11</sub> <sup>+2</sup>                                 | 853.8882 <sup>+2</sup> | b <sub>16</sub> -H <sub>3</sub> PO <sub>4</sub> <sup>+2</sup> | 1210.6426              | y <sub>11</sub>                                               | 1880.8807 | MH-H <sub>3</sub> PO <sub>4</sub>               |
| 394.7349 <sup>+2</sup> | y <sub>7</sub> <sup>+2</sup>                                 | 640.1797               | b <sub>5</sub>                                                | 859.3251               | b <sub>8</sub> -H <sub>3</sub> PO <sub>4</sub>                | 1304.4865              | b <sub>11</sub>                                               | 1978.8576 | MH                                              |

MS/MS Fragmentation of AAPWGSNPsPSAESTQAmDR  
 Found in IPI00183572, Isoform 2 of Deducator of cytokinesis protein 7

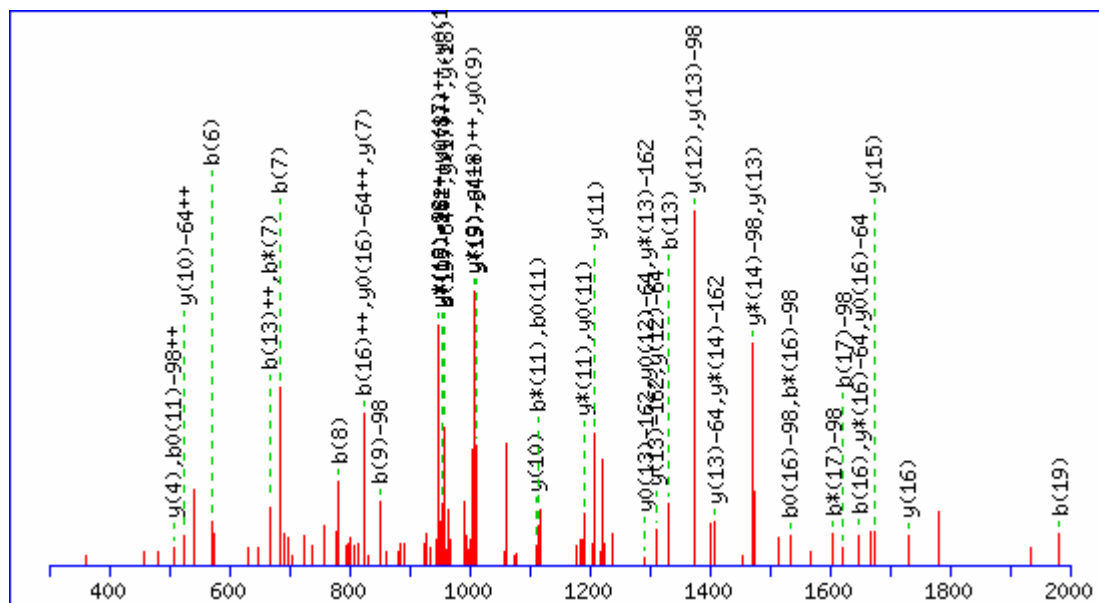

|                        |                               |                        |                                                               |                         |                                                               |           |                                                 |           |                                                 |
|------------------------|-------------------------------|------------------------|---------------------------------------------------------------|-------------------------|---------------------------------------------------------------|-----------|-------------------------------------------------|-----------|-------------------------------------------------|
| 88.0631 <sup>+2</sup>  | y <sub>1</sub> <sup>+2</sup>  | 570.2671               | b <sub>6</sub>                                                | 909.8892 <sup>+2</sup>  | y <sub>17</sub> -H <sub>3</sub> PO <sub>4</sub> <sup>+2</sup> | 1208.5212 | y <sub>11</sub>                                 | 1673.6473 | y <sub>15</sub>                                 |
| 143.0815               | b <sub>2</sub>                | 604.7642 <sup>+2</sup> | y <sub>11</sub> <sup>+2</sup>                                 | 947.437                 | b <sub>10</sub> -H <sub>3</sub> PO <sub>4</sub>               | 1234.5487 | b <sub>13</sub> -H <sub>3</sub> PO <sub>4</sub> | 1719.701  | b <sub>17</sub>                                 |
| 145.5766 <sup>+2</sup> | y <sub>2</sub> <sup>+2</sup>  | 636.277                | y <sub>5</sub>                                                | 948.3611                | b <sub>9</sub>                                                | 1277.5427 | y <sub>12</sub> -H <sub>3</sub> PO <sub>4</sub> | 1730.6687 | y <sub>16</sub>                                 |
| 175.119                | y <sub>1</sub>                | 639.2750 <sup>+2</sup> | y <sub>12</sub> -H <sub>3</sub> PO <sub>4</sub> <sup>+2</sup> | 953.3993                | y <sub>8</sub>                                                | 1321.5808 | b <sub>14</sub> -H <sub>3</sub> PO <sub>4</sub> | 1768.7595 | b <sub>18</sub> -H <sub>3</sub> PO <sub>4</sub> |
| 219.0943 <sup>+2</sup> | y <sub>3</sub> <sup>+2</sup>  | 684.31                 | b <sub>7</sub>                                                | 958.4156 <sup>+2</sup>  | y <sub>18</sub> -H <sub>3</sub> PO <sub>4</sub> <sup>+2</sup> | 1332.5256 | b <sub>13</sub>                                 | 1818.7712 | y <sub>17</sub> -H <sub>3</sub> PO <sub>4</sub> |
| 240.1343               | b <sub>3</sub>                | 687.8013 <sup>+2</sup> | y <sub>13</sub> -H <sub>3</sub> PO <sub>4</sub> <sup>+2</sup> | 958.8777 <sup>+2</sup>  | y <sub>17</sub> <sup>+2</sup>                                 | 1374.5954 | y <sub>13</sub> -H <sub>3</sub> PO <sub>4</sub> | 1866.7364 | b <sub>18</sub>                                 |
| 254.6128 <sup>+2</sup> | y <sub>4</sub> <sup>+2</sup>  | 688.2634 <sup>+2</sup> | y <sub>12</sub> <sup>+2</sup>                                 | 993.9342 <sup>+2</sup>  | y <sub>19</sub> -H <sub>3</sub> PO <sub>4</sub> <sup>+2</sup> | 1375.5196 | y <sub>12</sub>                                 | 1883.7865 | b <sub>19</sub> -H <sub>3</sub> PO <sub>4</sub> |
| 290.1459               | y <sub>2</sub>                | 736.7898 <sup>+2</sup> | y <sub>13</sub> <sup>+2</sup>                                 | 1007.4040 <sup>+2</sup> | y <sub>18</sub> <sup>+2</sup>                                 | 1419.5577 | b <sub>14</sub>                                 | 1915.8239 | y <sub>18</sub> -H <sub>3</sub> PO <sub>4</sub> |
| 318.6421 <sup>+2</sup> | y <sub>5</sub> <sup>+2</sup>  | 737.3247               | y <sub>6</sub>                                                | 1024.4364               | y <sub>9</sub>                                                | 1422.6284 | b <sub>15</sub> -H <sub>3</sub> PO <sub>4</sub> | 1916.748  | y <sub>17</sub>                                 |
| 369.1660 <sup>+2</sup> | y <sub>6</sub> <sup>+2</sup>  | 744.8228 <sup>+2</sup> | y <sub>14</sub> -H <sub>3</sub> PO <sub>4</sub> <sup>+2</sup> | 1029.4527 <sup>+2</sup> | MH-H <sub>3</sub> PO <sub>4</sub> <sup>+2</sup>               | 1472.5723 | y <sub>13</sub>                                 | 1981.7634 | b <sub>19</sub>                                 |
| 412.6820 <sup>+2</sup> | y <sub>7</sub> <sup>+2</sup>  | 781.3628               | b <sub>8</sub>                                                | 1034.469                | b <sub>11</sub> -H <sub>3</sub> PO <sub>4</sub>               | 1488.6383 | y <sub>14</sub> -H <sub>3</sub> PO <sub>4</sub> | 1986.861  | y <sub>19</sub> -H <sub>3</sub> PO <sub>4</sub> |
| 426.2136               | b <sub>4</sub>                | 788.3388 <sup>+2</sup> | y <sub>15</sub> -H <sub>3</sub> PO <sub>4</sub> <sup>+2</sup> | 1042.9226 <sup>+2</sup> | y <sub>19</sub> <sup>+2</sup>                                 | 1520.6053 | b <sub>15</sub>                                 | 2013.8008 | y <sub>18</sub>                                 |
| 437.1813               | y <sub>3</sub>                | 793.8113 <sup>+2</sup> | y <sub>14</sub> <sup>+2</sup>                                 | 1045.4139               | b <sub>10</sub>                                               | 1550.687  | b <sub>16</sub> -H <sub>3</sub> PO <sub>4</sub> | 2057.8981 | MH-H <sub>3</sub> PO <sub>4</sub>               |
| 477.2033 <sup>+2</sup> | y <sub>8</sub> <sup>+2</sup>  | 816.8496 <sup>+2</sup> | y <sub>16</sub> -H <sub>3</sub> PO <sub>4</sub> <sup>+2</sup> | 1078.4412 <sup>+2</sup> | MH <sup>+2</sup>                                              | 1575.6704 | y <sub>15</sub> -H <sub>3</sub> PO <sub>4</sub> | 2084.8379 | y <sub>19</sub>                                 |
| 483.235                | b <sub>5</sub>                | 824.3567               | y <sub>7</sub>                                                | 1105.5061               | b <sub>12</sub> -H <sub>3</sub> PO <sub>4</sub>               | 1586.6152 | y <sub>14</sub>                                 | 2155.875  | MH                                              |
| 508.2184               | y <sub>4</sub>                | 837.3273 <sup>+2</sup> | y <sub>15</sub> <sup>+2</sup>                                 | 1111.4684               | y <sub>10</sub>                                               | 1621.7241 | b <sub>17</sub> -H <sub>3</sub> PO <sub>4</sub> |           |                                                 |
| 512.7218 <sup>+2</sup> | y <sub>9</sub> <sup>+2</sup>  | 850.3842               | b <sub>9</sub> -H <sub>3</sub> PO <sub>4</sub>                | 1132.4459               | b <sub>11</sub>                                               | 1632.6918 | y <sub>16</sub> -H <sub>3</sub> PO <sub>4</sub> |           |                                                 |
| 556.2379 <sup>+2</sup> | y <sub>10</sub> <sup>+2</sup> | 865.8380 <sup>+2</sup> | y <sub>16</sub> <sup>+2</sup>                                 | 1203.483                | b <sub>12</sub>                                               | 1648.6639 | b <sub>16</sub>                                 |           |                                                 |

MS/MS Fragmentation of ELLTSDsPPHNDImTPVDPGVAQPNSR  
 Found in IPI00289866, Forkhead box protein O1A

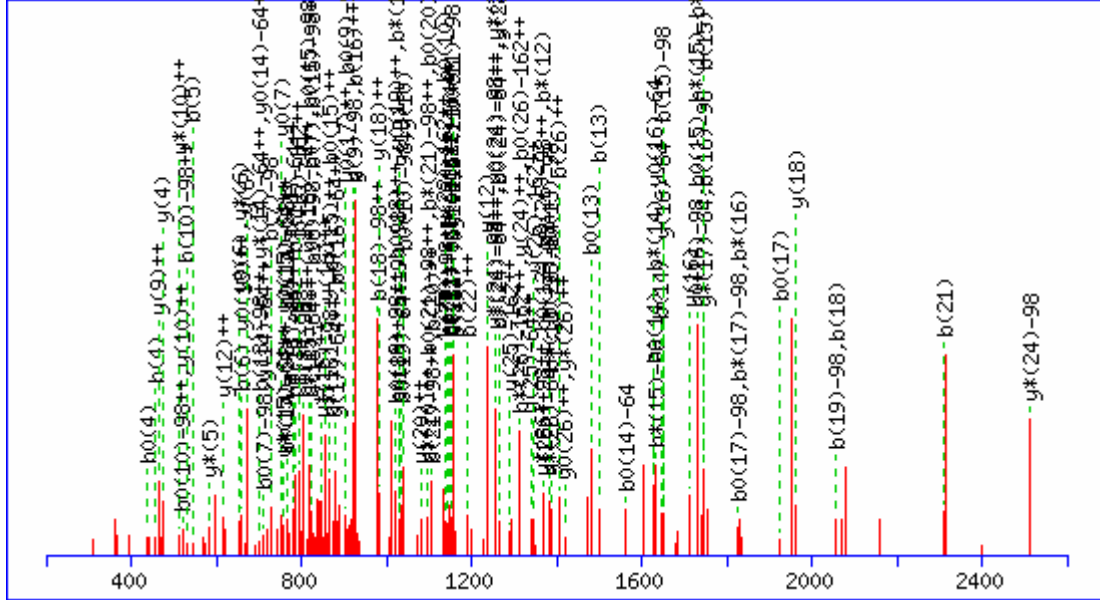

|                        |                                                               |                         |                                                               |                         |                                                               |                         |                                                               |           |                                                 |
|------------------------|---------------------------------------------------------------|-------------------------|---------------------------------------------------------------|-------------------------|---------------------------------------------------------------|-------------------------|---------------------------------------------------------------|-----------|-------------------------------------------------|
| 88.0631 <sup>+2</sup>  | y <sub>1</sub> <sup>+2</sup>                                  | 701.3359 <sup>+2</sup>  | b <sub>13</sub> -H <sub>3</sub> PO <sub>4</sub> <sup>+2</sup> | 1059.5106               | b <sub>10</sub> -H <sub>3</sub> PO <sub>4</sub>               | 1361.6069 <sup>+2</sup> | b <sub>25</sub> <sup>+2</sup>                                 | 2212.9468 | b <sub>20</sub>                                 |
| 131.5791 <sup>+2</sup> | y <sub>2</sub> <sup>+2</sup>                                  | 728.3461                | b <sub>7</sub> -H <sub>3</sub> PO <sub>4</sub>                | 1078.4663 <sup>+2</sup> | b <sub>19</sub> <sup>+2</sup>                                 | 1371.1155 <sup>+2</sup> | y <sub>25</sub> <sup>+2</sup>                                 | 2214.0383 | b <sub>21</sub> -H <sub>3</sub> PO <sub>4</sub> |
| 175.119                | y <sub>1</sub>                                                | 742.8617 <sup>+2</sup>  | y <sub>14</sub> <sup>+2</sup>                                 | 1079.5209 <sup>+2</sup> | y <sub>20</sub> <sup>+2</sup>                                 | 1378.6690 <sup>+2</sup> | y <sub>26</sub> -H <sub>3</sub> PO <sub>4</sub> <sup>+2</sup> | 2227.056  | y <sub>21</sub> -H <sub>3</sub> PO <sub>4</sub> |
| 188.6006 <sup>+2</sup> | y <sub>3</sub> <sup>+2</sup>                                  | 750.3243 <sup>+2</sup>  | b <sub>13</sub> <sup>+2</sup>                                 | 1106.9770 <sup>+2</sup> | b <sub>20</sub> <sup>+2</sup>                                 | 1386.5573               | b <sub>12</sub>                                               | 2285.0754 | b <sub>22</sub> -H <sub>3</sub> PO <sub>4</sub> |
| 237.1270 <sup>+2</sup> | y <sub>4</sub> <sup>+2</sup>                                  | 771.4108                | y <sub>7</sub>                                                | 1107.5228 <sup>+2</sup> | b <sub>21</sub> -H <sub>3</sub> PO <sub>4</sub> <sup>+2</sup> | 1401.6645               | b <sub>13</sub> -H <sub>3</sub> PO <sub>4</sub>               | 2312.0152 | b <sub>21</sub>                                 |
| 243.1339               | b <sub>2</sub>                                                | 774.8536 <sup>+2</sup>  | b <sub>14</sub> -H <sub>3</sub> PO <sub>4</sub> <sup>+2</sup> | 1114.0317 <sup>+2</sup> | y <sub>21</sub> -H <sub>3</sub> PO <sub>4</sub> <sup>+2</sup> | 1405.1230 <sup>+2</sup> | b <sub>26</sub> <sup>+2</sup>                                 | 2325.0329 | y <sub>21</sub>                                 |
| 262.151                | y <sub>2</sub>                                                | 799.4038 <sup>+2</sup>  | y <sub>15</sub> <sup>+2</sup>                                 | 1139.5804               | y <sub>11</sub>                                               | 1427.6575 <sup>+2</sup> | y <sub>26</sub> <sup>+2</sup>                                 | 2342.083  | y <sub>22</sub> -H <sub>3</sub> PO <sub>4</sub> |
| 301.1563 <sup>+2</sup> | y <sub>5</sub> <sup>+2</sup>                                  | 823.8420 <sup>+2</sup>  | b <sub>14</sub> <sup>+2</sup>                                 | 1143.0414 <sup>+2</sup> | b <sub>22</sub> -H <sub>3</sub> PO <sub>4</sub> <sup>+2</sup> | 1443.1903 <sup>+2</sup> | MH-H <sub>3</sub> PO <sub>4</sub> <sup>+2</sup>               | 2383.0523 | b <sub>22</sub>                                 |
| 336.6748 <sup>+2</sup> | y <sub>6</sub> <sup>+2</sup>                                  | 825.3774 <sup>+2</sup>  | b <sub>15</sub> -H <sub>3</sub> PO <sub>4</sub> <sup>+2</sup> | 1156.5112 <sup>+2</sup> | b <sub>21</sub> <sup>+2</sup>                                 | 1484.7162               | y <sub>14</sub>                                               | 2413.134  | b <sub>23</sub> -H <sub>3</sub> PO <sub>4</sub> |
| 356.218                | b <sub>3</sub>                                                | 825.3989                | b <sub>8</sub> -H <sub>3</sub> PO <sub>4</sub>                | 1157.4874               | b <sub>10</sub>                                               | 1492.1788 <sup>+2</sup> | MH <sup>+2</sup>                                              | 2429.115  | y <sub>23</sub> -H <sub>3</sub> PO <sub>4</sub> |
| 376.1939               | y <sub>3</sub>                                                | 826.323                 | b <sub>7</sub>                                                | 1163.0201 <sup>+2</sup> | y <sub>21</sub> <sup>+2</sup>                                 | 1499.6414               | b <sub>13</sub>                                               | 2440.0599 | y <sub>22</sub>                                 |
| 386.2090 <sup>+2</sup> | y <sub>7</sub> <sup>+2</sup>                                  | 828.4322                | y <sub>8</sub>                                                | 1171.5451 <sup>+2</sup> | y <sub>22</sub> -H <sub>3</sub> PO <sub>4</sub> <sup>+2</sup> | 1548.6999               | b <sub>14</sub> -H <sub>3</sub> PO <sub>4</sub>               | 2510.1868 | b <sub>24</sub> -H <sub>3</sub> PO <sub>4</sub> |
| 414.7198 <sup>+2</sup> | y <sub>8</sub> <sup>+2</sup>                                  | 856.9172 <sup>+2</sup>  | y <sub>16</sub> <sup>+2</sup>                                 | 1173.5535               | b <sub>11</sub> -H <sub>3</sub> PO <sub>4</sub>               | 1597.8003               | y <sub>15</sub>                                               | 2511.1109 | b <sub>23</sub>                                 |
| 457.2657               | b <sub>4</sub>                                                | 873.9038 <sup>+2</sup>  | b <sub>16</sub> -H <sub>3</sub> PO <sub>4</sub> <sup>+2</sup> | 1192.0298 <sup>+2</sup> | b <sub>22</sub> <sup>+2</sup>                                 | 1646.6768               | b <sub>14</sub>                                               | 2527.0919 | y <sub>23</sub>                                 |
| 463.2461 <sup>+2</sup> | y <sub>9</sub> <sup>+2</sup>                                  | 874.3659 <sup>+2</sup>  | b <sub>15</sub> <sup>+2</sup>                                 | 1207.0706 <sup>+2</sup> | b <sub>23</sub> -H <sub>3</sub> PO <sub>4</sub> <sup>+2</sup> | 1649.7476               | b <sub>15</sub> -H <sub>3</sub> PO <sub>4</sub>               | 2530.1627 | y <sub>24</sub> -H <sub>3</sub> PO <sub>4</sub> |
| 473.2467               | y <sub>4</sub>                                                | 913.9387 <sup>+2</sup>  | y <sub>17</sub> <sup>+2</sup>                                 | 1215.0611 <sup>+2</sup> | y <sub>23</sub> -H <sub>3</sub> PO <sub>4</sub> <sup>+2</sup> | 1712.8272               | y <sub>16</sub>                                               | 2608.1637 | b <sub>24</sub>                                 |
| 520.7596 <sup>+2</sup> | y <sub>10</sub> <sup>+2</sup>                                 | 922.4516                | b <sub>9</sub> -H <sub>3</sub> PO <sub>4</sub>                | 1220.5336 <sup>+2</sup> | y <sub>22</sub> <sup>+2</sup>                                 | 1746.8003               | b <sub>16</sub> -H <sub>3</sub> PO <sub>4</sub>               | 2624.2297 | b <sub>25</sub> -H <sub>3</sub> PO <sub>4</sub> |
| 530.2589 <sup>+2</sup> | b <sub>10</sub> -H <sub>3</sub> PO <sub>4</sub> <sup>+2</sup> | 922.8922 <sup>+2</sup>  | b <sub>16</sub> <sup>+2</sup>                                 | 1236.6331               | y <sub>12</sub>                                               | 1747.7245               | b <sub>15</sub>                                               | 2628.1396 | y <sub>24</sub>                                 |
| 544.2977               | b <sub>5</sub>                                                | 923.3758                | b <sub>8</sub>                                                | 1255.5970 <sup>+2</sup> | b <sub>24</sub> -H <sub>3</sub> PO <sub>4</sub> <sup>+2</sup> | 1826.8701               | y <sub>17</sub>                                               | 2643.2468 | y <sub>25</sub> -H <sub>3</sub> PO <sub>4</sub> |
| 570.2938 <sup>+2</sup> | y <sub>11</sub> <sup>+2</sup>                                 | 923.4380 <sup>+2</sup>  | b <sub>17</sub> -H <sub>3</sub> PO <sub>4</sub> <sup>+2</sup> | 1256.0591 <sup>+2</sup> | b <sub>23</sub> <sup>+2</sup>                                 | 1844.7772               | b <sub>16</sub>                                               | 2711.2617 | b <sub>26</sub> -H <sub>3</sub> PO <sub>4</sub> |
| 579.2474 <sup>+2</sup> | b <sub>10</sub> <sup>+2</sup>                                 | 925.485                 | y <sub>9</sub>                                                | 1264.0496 <sup>+2</sup> | y <sub>23</sub> <sup>+2</sup>                                 | 1845.8687               | b <sub>17</sub> -H <sub>3</sub> PO <sub>4</sub>               | 2722.2066 | b <sub>25</sub>                                 |
| 587.2804 <sup>+2</sup> | b <sub>11</sub> -H <sub>3</sub> PO <sub>4</sub> <sup>+2</sup> | 972.4265 <sup>+2</sup>  | b <sub>17</sub> <sup>+2</sup>                                 | 1265.5850 <sup>+2</sup> | y <sub>24</sub> -H <sub>3</sub> PO <sub>4</sub> <sup>+2</sup> | 1943.8456               | b <sub>17</sub>                                               | 2741.2236 | y <sub>25</sub>                                 |
| 601.3052               | y <sub>5</sub>                                                | 980.9515 <sup>+2</sup>  | b <sub>18</sub> -H <sub>3</sub> PO <sub>4</sub> <sup>+2</sup> | 1271.5304               | b <sub>11</sub>                                               | 1960.8957               | b <sub>18</sub> -H <sub>3</sub> PO <sub>4</sub>               | 2756.3308 | y <sub>26</sub> -H <sub>3</sub> PO <sub>4</sub> |
| 618.8202 <sup>+2</sup> | y <sub>12</sub> <sup>+2</sup>                                 | 982.4682 <sup>+2</sup>  | y <sub>18</sub> <sup>+2</sup>                                 | 1288.5804               | b <sub>12</sub> -H <sub>3</sub> PO <sub>4</sub>               | 1963.929                | y <sub>18</sub>                                               | 2809.2386 | b <sub>26</sub>                                 |
| 636.2688 <sup>+2</sup> | b <sub>11</sub> <sup>+2</sup>                                 | 1020.4285               | b <sub>9</sub>                                                | 1304.5855 <sup>+2</sup> | b <sub>24</sub> <sup>+2</sup>                                 | 2057.9484               | b <sub>19</sub> -H <sub>3</sub> PO <sub>4</sub>               | 2854.3077 | y <sub>26</sub>                                 |
| 644.7938 <sup>+2</sup> | b <sub>12</sub> -H <sub>3</sub> PO <sub>4</sub> <sup>+2</sup> | 1029.4779 <sup>+2</sup> | b <sub>19</sub> -H <sub>3</sub> PO <sub>4</sub> <sup>+2</sup> | 1312.6185 <sup>+2</sup> | b <sub>25</sub> -H <sub>3</sub> PO <sub>4</sub> <sup>+2</sup> | 2058.8726               | b <sub>18</sub>                                               | 2885.3734 | MH-H <sub>3</sub> PO <sub>4</sub>               |
| 659.3246               | b <sub>6</sub>                                                | 1029.9399 <sup>+2</sup> | b <sub>18</sub> <sup>+2</sup>                                 | 1314.5734 <sup>+2</sup> | y <sub>24</sub> <sup>+2</sup>                                 | 2060.9818               | y <sub>19</sub>                                               | 2983.3503 | MH                                              |
| 669.3440 <sup>+2</sup> | y <sub>13</sub> <sup>+2</sup>                                 | 1030.9945 <sup>+2</sup> | y <sub>19</sub> <sup>+2</sup>                                 | 1322.1270 <sup>+2</sup> | y <sub>25</sub> -H <sub>3</sub> PO <sub>4</sub> <sup>+2</sup> | 2114.9699               | b <sub>20</sub> -H <sub>3</sub> PO <sub>4</sub>               |           |                                                 |
| 672.3424               | y <sub>6</sub>                                                | 1040.5119               | y <sub>10</sub>                                               | 1337.6808               | y <sub>13</sub>                                               | 2155.9253               | b <sub>19</sub>                                               |           |                                                 |
| 693.7823 <sup>+2</sup> | b <sub>12</sub> <sup>+2</sup>                                 | 1057.9886 <sup>+2</sup> | b <sub>20</sub> -H <sub>3</sub> PO <sub>4</sub> <sup>+2</sup> | 1356.1345 <sup>+2</sup> | b <sub>26</sub> -H <sub>3</sub> PO <sub>4</sub> <sup>+2</sup> | 2158.0346               | y <sub>20</sub>                                               |           |                                                 |

MS/MS Fragmentation of sAPASPTHPLmSPR  
 Found in IPI00556645, forkhead box K1

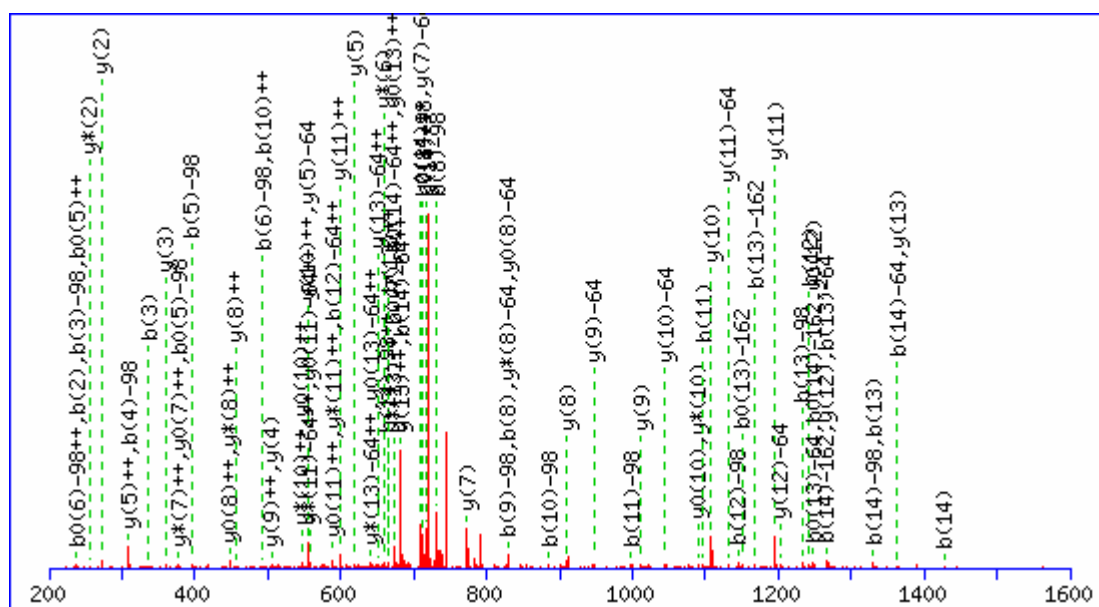

|                        |                                                              |                        |                                                               |                        |                                                               |                        |                                                 |           |                                                 |
|------------------------|--------------------------------------------------------------|------------------------|---------------------------------------------------------------|------------------------|---------------------------------------------------------------|------------------------|-------------------------------------------------|-----------|-------------------------------------------------|
| 88.0631 <sup>+2</sup>  | y <sub>1</sub> <sup>+2</sup>                                 | 387.2024 <sup>+2</sup> | y <sub>7</sub> <sup>+2</sup>                                  | 554.7820 <sup>+2</sup> | y <sub>10</sub> <sup>+2</sup>                                 | 717.8615 <sup>+2</sup> | y <sub>14</sub> <sup>+2</sup>                   | 1145.5408 | b <sub>12</sub> -H <sub>3</sub> PO <sub>4</sub> |
| 136.5895 <sup>+2</sup> | y <sub>2</sub> <sup>+2</sup>                                 | 396.1878               | b <sub>5</sub> -H <sub>3</sub> PO <sub>4</sub>                | 573.2740 <sup>+2</sup> | b <sub>12</sub> -H <sub>3</sub> PO <sub>4</sub> <sup>+2</sup> | 731.3471               | b <sub>8</sub> -H <sub>3</sub> PO <sub>4</sub>  | 1195.5888 | y <sub>11</sub>                                 |
| 141.0659               | b <sub>2</sub> -H <sub>3</sub> PO <sub>4</sub>               | 407.1326               | b <sub>4</sub>                                                | 591.2174               | b <sub>6</sub>                                                | 752.3723 <sup>+2</sup> | MH-H <sub>3</sub> PO <sub>4</sub> <sup>+2</sup> | 1232.5728 | b <sub>13</sub> -H <sub>3</sub> PO <sub>4</sub> |
| 175.119                | y <sub>1</sub>                                               | 414.7036 <sup>+2</sup> | b <sub>9</sub> -H <sub>3</sub> PO <sub>4</sub> <sup>+2</sup>  | 594.2882               | b <sub>7</sub> -H <sub>3</sub> PO <sub>4</sub>                | 773.3974               | y <sub>7</sub>                                  | 1243.5177 | b <sub>12</sub>                                 |
| 180.1055 <sup>+2</sup> | y <sub>3</sub> <sup>+2</sup>                                 | 415.1656 <sup>+2</sup> | b <sub>8</sub> <sup>+2</sup>                                  | 598.2980 <sup>+2</sup> | y <sub>11</sub> <sup>+2</sup>                                 | 801.3607 <sup>+2</sup> | MH <sup>+2</sup>                                | 1266.6259 | y <sub>12</sub>                                 |
| 238.1186               | b <sub>3</sub> -H <sub>3</sub> PO <sub>4</sub>               | 443.2143 <sup>+2</sup> | b <sub>10</sub> -H <sub>3</sub> PO <sub>4</sub> <sup>+2</sup> | 616.7901 <sup>+2</sup> | b <sub>13</sub> -H <sub>3</sub> PO <sub>4</sub> <sup>+2</sup> | 828.3999               | b <sub>9</sub> -H <sub>3</sub> PO <sub>4</sub>  | 1329.6256 | b <sub>14</sub> -H <sub>3</sub> PO <sub>4</sub> |
| 239.0427               | b <sub>2</sub>                                               | 455.7318 <sup>+2</sup> | y <sub>8</sub> <sup>+2</sup>                                  | 619.3232               | y <sub>5</sub>                                                | 829.324                | b <sub>8</sub>                                  | 1330.5497 | b <sub>13</sub>                                 |
| 253.6232 <sup>+2</sup> | y <sub>4</sub> <sup>+2</sup>                                 | 463.6920 <sup>+2</sup> | b <sub>9</sub> <sup>+2</sup>                                  | 622.2625 <sup>+2</sup> | b <sub>12</sub> <sup>+2</sup>                                 | 885.4213               | b <sub>10</sub> -H <sub>3</sub> PO <sub>4</sub> | 1363.6787 | y <sub>13</sub>                                 |
| 272.1717               | y <sub>2</sub>                                               | 492.2028 <sup>+2</sup> | b <sub>10</sub> <sup>+2</sup>                                 | 633.8166 <sup>+2</sup> | y <sub>12</sub> <sup>+2</sup>                                 | 910.4563               | y <sub>8</sub>                                  | 1427.6025 | b <sub>14</sub>                                 |
| 309.1557               | b <sub>4</sub> -H <sub>3</sub> PO <sub>4</sub>               | 493.2405               | b <sub>6</sub> -H <sub>3</sub> PO <sub>4</sub>                | 665.3164 <sup>+2</sup> | b <sub>14</sub> -H <sub>3</sub> PO <sub>4</sub> <sup>+2</sup> | 926.3768               | b <sub>9</sub>                                  | 1434.7158 | y <sub>14</sub>                                 |
| 310.1652 <sup>+2</sup> | y <sub>5</sub> <sup>+2</sup>                                 | 494.1647               | b <sub>5</sub>                                                | 665.7785 <sup>+2</sup> | b <sub>13</sub> <sup>+2</sup>                                 | 983.3982               | b <sub>10</sub>                                 | 1503.7373 | MH-H <sub>3</sub> PO <sub>4</sub>               |
| 336.0955               | b <sub>3</sub>                                               | 499.7563 <sup>+2</sup> | b <sub>11</sub> -H <sub>3</sub> PO <sub>4</sub> <sup>+2</sup> | 676.3447               | y <sub>6</sub>                                                | 998.5054               | b <sub>11</sub> -H <sub>3</sub> PO <sub>4</sub> | 1601.7142 | MH                                              |
| 338.6760 <sup>+2</sup> | y <sub>6</sub> <sup>+2</sup>                                 | 506.2391               | y <sub>4</sub>                                                | 682.3430 <sup>+2</sup> | y <sub>13</sub> <sup>+2</sup>                                 | 1011.504               | y <sub>9</sub>                                  |           |                                                 |
| 359.2037               | y <sub>3</sub>                                               | 506.2557 <sup>+2</sup> | y <sub>9</sub> <sup>+2</sup>                                  | 692.2651               | b <sub>7</sub>                                                | 1096.4823              | b <sub>11</sub>                                 |           |                                                 |
| 366.1772 <sup>+2</sup> | b <sub>8</sub> -H <sub>3</sub> PO <sub>4</sub> <sup>+2</sup> | 548.7448 <sup>+2</sup> | b <sub>11</sub> <sup>+2</sup>                                 | 714.3049 <sup>+2</sup> | b <sub>14</sub> <sup>+2</sup>                                 | 1108.5568              | y <sub>10</sub>                                 |           |                                                 |

MS/MS Fragmentation of VGmFEAHIQAQSSAIQAPRsPR  
Found in IPI00021449, Isoform 1 of Inositol-trisphosphate 3-kinase B

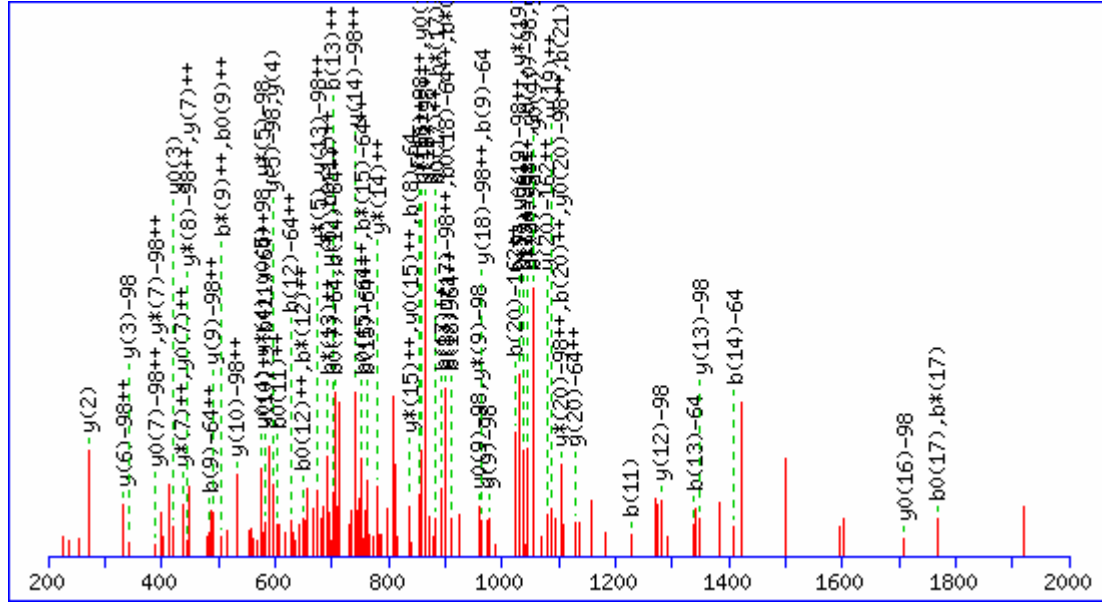

|                        |                                                              |                        |                                                               |                         |                                                               |                         |                                                               |           |                                                 |
|------------------------|--------------------------------------------------------------|------------------------|---------------------------------------------------------------|-------------------------|---------------------------------------------------------------|-------------------------|---------------------------------------------------------------|-----------|-------------------------------------------------|
| 88.0631 <sup>+2</sup>  | y <sub>1</sub> <sup>+2</sup>                                 | 515.2448 <sup>+2</sup> | b <sub>9</sub> <sup>+2</sup>                                  | 793.4427                | y <sub>7</sub> -H <sub>3</sub> PO <sub>4</sub>                | 1100.5193               | b <sub>10</sub>                                               | 1689.8432 | y <sub>15</sub>                                 |
| 136.5895 <sup>+2</sup> | y <sub>2</sub> <sup>+2</sup>                                 | 532.8016 <sup>+2</sup> | y <sub>10</sub> -H <sub>3</sub> PO <sub>4</sub> <sup>+2</sup> | 793.8852 <sup>+2</sup>  | b <sub>15</sub> <sup>+2</sup>                                 | 1103.0471 <sup>+2</sup> | b <sub>21</sub> -H <sub>3</sub> PO <sub>4</sub> <sup>+2</sup> | 1714.8217 | b <sub>16</sub>                                 |
| 157.0972               | b <sub>2</sub>                                               | 538.2740 <sup>+2</sup> | y <sub>9</sub> <sup>+2</sup>                                  | 796.4368 <sup>+2</sup>  | y <sub>15</sub> -H <sub>3</sub> PO <sub>4</sub> <sup>+2</sup> | 1103.5092 <sup>+2</sup> | b <sub>20</sub> <sup>+2</sup>                                 | 1728.9252 | y <sub>16</sub> -H <sub>3</sub> PO <sub>4</sub> |
| 171.1002 <sup>+2</sup> | y <sub>3</sub> -H <sub>3</sub> PO <sub>4</sub> <sup>+2</sup> | 550.7633 <sup>+2</sup> | b <sub>10</sub> <sup>+2</sup>                                 | 845.4252 <sup>+2</sup>  | y <sub>15</sub> <sup>+2</sup>                                 | 1112.0580 <sup>+2</sup> | y <sub>20</sub> -H <sub>3</sub> PO <sub>4</sub> <sup>+2</sup> | 1785.8588 | b <sub>17</sub>                                 |
| 175.119                | y <sub>1</sub>                                               | 576.3176 <sup>+2</sup> | y <sub>11</sub> -H <sub>3</sub> PO <sub>4</sub> <sup>+2</sup> | 857.9145 <sup>+2</sup>  | b <sub>16</sub> <sup>+2</sup>                                 | 1140.5687 <sup>+2</sup> | y <sub>21</sub> -H <sub>3</sub> PO <sub>4</sub> <sup>+2</sup> | 1799.9623 | y <sub>17</sub> -H <sub>3</sub> PO <sub>4</sub> |
| 220.0887 <sup>+2</sup> | y <sub>3</sub> <sup>+2</sup>                                 | 580.2436               | b <sub>5</sub>                                                | 864.9663 <sup>+2</sup>  | y <sub>16</sub> -H <sub>3</sub> PO <sub>4</sub> <sup>+2</sup> | 1151.628                | y <sub>11</sub> -H <sub>3</sub> PO <sub>4</sub>               | 1826.9021 | y <sub>16</sub>                                 |
| 249.1508 <sup>+2</sup> | y <sub>4</sub> -H <sub>3</sub> PO <sub>4</sub> <sup>+2</sup> | 581.7901 <sup>+2</sup> | y <sub>10</sub> <sup>+2</sup>                                 | 891.4196                | y <sub>7</sub>                                                | 1152.0356 <sup>+2</sup> | b <sub>21</sub> <sup>+2</sup>                                 | 1882.9116 | b <sub>18</sub>                                 |
| 272.1717               | y <sub>2</sub>                                               | 594.3471               | y <sub>5</sub> -H <sub>3</sub> PO <sub>4</sub>                | 893.4331 <sup>+2</sup>  | b <sub>17</sub> <sup>+2</sup>                                 | 1161.0465 <sup>+2</sup> | y <sub>20</sub> <sup>+2</sup>                                 | 1897.9392 | y <sub>17</sub>                                 |
| 297.6772 <sup>+2</sup> | y <sub>5</sub> -H <sub>3</sub> PO <sub>4</sub> <sup>+2</sup> | 595.2712               | y <sub>4</sub>                                                | 900.4848 <sup>+2</sup>  | y <sub>17</sub> -H <sub>3</sub> PO <sub>4</sub> <sup>+2</sup> | 1162.5728               | y <sub>10</sub>                                               | 1929.0049 | y <sub>18</sub> -H <sub>3</sub> PO <sub>4</sub> |
| 298.1392 <sup>+2</sup> | y <sub>4</sub> <sup>+2</sup>                                 | 614.7926 <sup>+2</sup> | b <sub>11</sub> <sup>+2</sup>                                 | 901.4236                | b <sub>8</sub>                                                | 1189.5572 <sup>+2</sup> | y <sub>21</sub> <sup>+2</sup>                                 | 2026.9818 | y <sub>18</sub>                                 |
| 304.1326               | b <sub>3</sub>                                               | 625.3061 <sup>+2</sup> | y <sub>11</sub> <sup>+2</sup>                                 | 906.5268                | y <sub>8</sub> -H <sub>3</sub> PO <sub>4</sub>                | 1190.1029 <sup>+2</sup> | MH-H <sub>3</sub> PO <sub>4</sub> <sup>+2</sup>               | 2039.0127 | b <sub>19</sub>                                 |
| 333.1957 <sup>+2</sup> | y <sub>6</sub> -H <sub>3</sub> PO <sub>4</sub> <sup>+2</sup> | 640.3469 <sup>+2</sup> | y <sub>12</sub> -H <sub>3</sub> PO <sub>4</sub> <sup>+2</sup> | 913.9547 <sup>+2</sup>  | y <sub>16</sub> <sup>+2</sup>                                 | 1228.5779               | b <sub>11</sub>                                               | 2076.0733 | y <sub>19</sub> -H <sub>3</sub> PO <sub>4</sub> |
| 341.1932               | y <sub>3</sub> -H <sub>3</sub> PO <sub>4</sub>               | 651.2807               | b <sub>6</sub>                                                | 941.9594 <sup>+2</sup>  | b <sub>18</sub> <sup>+2</sup>                                 | 1239.0914 <sup>+2</sup> | MH <sup>+2</sup>                                              | 2108.0342 | b <sub>20</sub> -H <sub>3</sub> PO <sub>4</sub> |
| 346.6656 <sup>+2</sup> | y <sub>5</sub> <sup>+2</sup>                                 | 658.3086 <sup>+2</sup> | b <sub>12</sub> <sup>+2</sup>                                 | 949.4733 <sup>+2</sup>  | y <sub>17</sub> <sup>+2</sup>                                 | 1249.6049               | y <sub>11</sub>                                               | 2174.0502 | y <sub>19</sub>                                 |
| 382.1842 <sup>+2</sup> | y <sub>6</sub> <sup>+2</sup>                                 | 665.3842               | y <sub>6</sub> -H <sub>3</sub> PO <sub>4</sub>                | 965.0061 <sup>+2</sup>  | y <sub>18</sub> -H <sub>3</sub> PO <sub>4</sub> <sup>+2</sup> | 1279.6866               | y <sub>12</sub> -H <sub>3</sub> PO <sub>4</sub>               | 2205.0869 | b <sub>21</sub> -H <sub>3</sub> PO <sub>4</sub> |
| 394.6734 <sup>+2</sup> | b <sub>7</sub> <sup>+2</sup>                                 | 675.8655 <sup>+2</sup> | y <sub>13</sub> -H <sub>3</sub> PO <sub>4</sub> <sup>+2</sup> | 977.5639                | y <sub>9</sub> -H <sub>3</sub> PO <sub>4</sub>                | 1315.6099               | b <sub>12</sub>                                               | 2206.0111 | b <sub>20</sub>                                 |
| 397.2250 <sup>+2</sup> | y <sub>7</sub> -H <sub>3</sub> PO <sub>4</sub> <sup>+2</sup> | 689.3354 <sup>+2</sup> | y <sub>12</sub> <sup>+2</sup>                                 | 1004.5037               | y <sub>8</sub>                                                | 1350.7237               | y <sub>13</sub> -H <sub>3</sub> PO <sub>4</sub>               | 2223.1087 | y <sub>20</sub> -H <sub>3</sub> PO <sub>4</sub> |
| 439.1701               | y <sub>3</sub>                                               | 692.3239               | y <sub>5</sub>                                                | 1013.9946 <sup>+2</sup> | y <sub>18</sub> <sup>+2</sup>                                 | 1377.6635               | y <sub>12</sub>                                               | 2280.1302 | y <sub>21</sub> -H <sub>3</sub> PO <sub>4</sub> |
| 446.2135 <sup>+2</sup> | y <sub>7</sub> <sup>+2</sup>                                 | 701.8246 <sup>+2</sup> | b <sub>13</sub> <sup>+2</sup>                                 | 1020.0100 <sup>+2</sup> | b <sub>19</sub> <sup>+2</sup>                                 | 1402.642                | b <sub>13</sub>                                               | 2303.0638 | b <sub>21</sub>                                 |
| 451.201                | b <sub>4</sub>                                               | 724.8539 <sup>+2</sup> | y <sub>13</sub> <sup>+2</sup>                                 | 1029.4822               | b <sub>9</sub>                                                | 1448.7006               | y <sub>13</sub>                                               | 2321.0856 | y <sub>20</sub>                                 |
| 451.2155 <sup>+2</sup> | b <sub>8</sub> <sup>+2</sup>                                 | 737.3432 <sup>+2</sup> | b <sub>14</sub> <sup>+2</sup>                                 | 1038.5403 <sup>+2</sup> | y <sub>19</sub> -H <sub>3</sub> PO <sub>4</sub> <sup>+2</sup> | 1473.6791               | b <sub>14</sub>                                               | 2378.1071 | y <sub>21</sub>                                 |
| 453.7670 <sup>+2</sup> | y <sub>8</sub> -H <sub>3</sub> PO <sub>4</sub> <sup>+2</sup> | 739.8948 <sup>+2</sup> | y <sub>14</sub> -H <sub>3</sub> PO <sub>4</sub> <sup>+2</sup> | 1054.5207 <sup>+2</sup> | b <sub>20</sub> -H <sub>3</sub> PO <sub>4</sub> <sup>+2</sup> | 1478.7822               | y <sub>14</sub> -H <sub>3</sub> PO <sub>4</sub>               | 2379.1986 | MH-H <sub>3</sub> PO <sub>4</sub>               |
| 489.2856 <sup>+2</sup> | y <sub>9</sub> -H <sub>3</sub> PO <sub>4</sub> <sup>+2</sup> | 763.3611               | y <sub>6</sub>                                                | 1064.596                | y <sub>10</sub> -H <sub>3</sub> PO <sub>4</sub>               | 1576.7591               | y <sub>14</sub>                                               | 2477.1755 | MH                                              |
| 497.2943               | y <sub>4</sub> -H <sub>3</sub> PO <sub>4</sub>               | 788.3396               | b <sub>7</sub>                                                | 1075.5408               | y <sub>9</sub>                                                | 1586.7632               | b <sub>15</sub>                                               |           |                                                 |
| 502.7555 <sup>+2</sup> | y <sub>8</sub> <sup>+2</sup>                                 | 788.8832 <sup>+2</sup> | y <sub>14</sub> <sup>+2</sup>                                 | 1087.5288 <sup>+2</sup> | y <sub>19</sub> <sup>+2</sup>                                 | 1591.8663               | y <sub>15</sub> -H <sub>3</sub> PO <sub>4</sub>               |           |                                                 |



MS/MS Fragmentation of SMNKSIVVTMAKSLN<sub>s</sub>VENK  
 Found in IPI00012469, Isoform 1 of Signaling lymphocytic activation molecule precursor

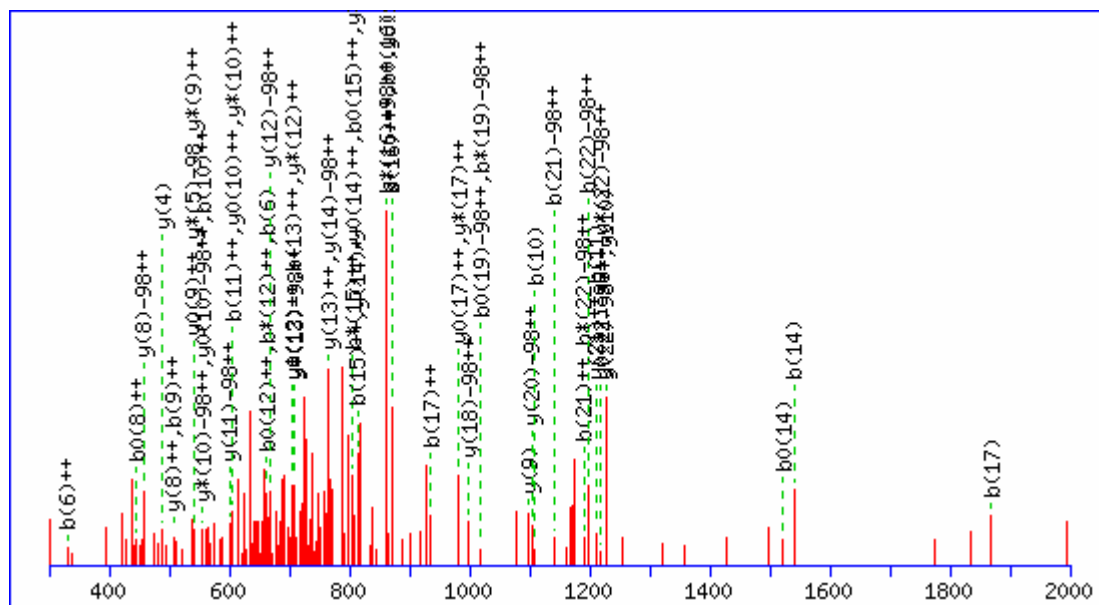

|                        |                                                              |                        |                                                               |                         |                                                               |                         |                                                               |           |                                                 |
|------------------------|--------------------------------------------------------------|------------------------|---------------------------------------------------------------|-------------------------|---------------------------------------------------------------|-------------------------|---------------------------------------------------------------|-----------|-------------------------------------------------|
| 74.0600 <sup>+2</sup>  | y <sub>1</sub> <sup>+2</sup>                                 | 550.2370 <sup>+2</sup> | y <sub>9</sub> <sup>+2</sup>                                  | 872.4691 <sup>+2</sup>  | y <sub>16</sub> -H <sub>3</sub> PO <sub>4</sub> <sup>+2</sup> | 1190.0760 <sup>+2</sup> | b <sub>21</sub> <sup>+2</sup>                                 | 1869.9925 | b <sub>17</sub>                                 |
| 131.0815 <sup>+2</sup> | y <sub>2</sub> <sup>+2</sup>                                 | 555.3104 <sup>+2</sup> | b <sub>10</sub> <sup>+2</sup>                                 | 899.3506                | y <sub>7</sub>                                                | 1198.1091 <sup>+2</sup> | b <sub>22</sub> -H <sub>3</sub> PO <sub>4</sub> <sup>+2</sup> | 1880.9899 | y <sub>17</sub> -H <sub>3</sub> PO <sub>4</sub> |
| 147.1128               | y <sub>1</sub>                                               | 558.2882               | y <sub>5</sub> -H <sub>3</sub> PO <sub>4</sub>                | 911.4767                | b <sub>8</sub>                                                | 1200.6219               | y <sub>11</sub> -H <sub>3</sub> PO <sub>4</sub>               | 1978.9668 | y <sub>17</sub>                                 |
| 195.6028 <sup>+2</sup> | y <sub>3</sub> <sup>+2</sup>                                 | 565.2960 <sup>+2</sup> | y <sub>10</sub> -H <sub>3</sub> PO <sub>4</sub> <sup>+2</sup> | 914.4578                | y <sub>8</sub> -H <sub>3</sub> PO <sub>4</sub>                | 1210.6613               | b <sub>11</sub>                                               | 1984.0354 | b <sub>18</sub>                                 |
| 219.0798               | b <sub>2</sub>                                               | 600.8146 <sup>+2</sup> | y <sub>11</sub> -H <sub>3</sub> PO <sub>4</sub> <sup>+2</sup> | 921.4576 <sup>+2</sup>  | y <sub>16</sub> <sup>+2</sup>                                 | 1211.1140 <sup>+2</sup> | y <sub>21</sub> <sup>+2</sup>                                 | 1994.0739 | y <sub>18</sub> -H <sub>3</sub> PO <sub>4</sub> |
| 231.1125 <sup>+2</sup> | b <sub>4</sub> <sup>+2</sup>                                 | 605.8343 <sup>+2</sup> | b <sub>11</sub> <sup>+2</sup>                                 | 935.4999 <sup>+2</sup>  | b <sub>17</sub> <sup>+2</sup>                                 | 1227.5617               | y <sub>10</sub>                                               | 2053.0569 | b <sub>19</sub> -H <sub>3</sub> PO <sub>4</sub> |
| 245.1370 <sup>+2</sup> | y <sub>4</sub> <sup>+2</sup>                                 | 614.2845 <sup>+2</sup> | y <sub>10</sub> <sup>+2</sup>                                 | 940.9986 <sup>+2</sup>  | y <sub>17</sub> -H <sub>3</sub> PO <sub>4</sub> <sup>+2</sup> | 1227.6458 <sup>+2</sup> | y <sub>22</sub> -H <sub>3</sub> PO <sub>4</sub> <sup>+2</sup> | 2081.106  | y <sub>19</sub> -H <sub>3</sub> PO <sub>4</sub> |
| 261.1557               | y <sub>2</sub>                                               | 649.8030 <sup>+2</sup> | y <sub>11</sub> <sup>+2</sup>                                 | 989.9870 <sup>+2</sup>  | y <sub>17</sub> <sup>+2</sup>                                 | 1247.0975 <sup>+2</sup> | b <sub>22</sub> <sup>+2</sup>                                 | 2092.0508 | y <sub>18</sub>                                 |
| 274.6285 <sup>+2</sup> | b <sub>5</sub> <sup>+2</sup>                                 | 656.2651               | y <sub>5</sub>                                                | 992.5214 <sup>+2</sup>  | b <sub>18</sub> <sup>+2</sup>                                 | 1271.1618 <sup>+2</sup> | MH-H <sub>3</sub> PO <sub>4</sub> <sup>+2</sup>               | 2151.0338 | b <sub>19</sub>                                 |
| 279.6477 <sup>+2</sup> | y <sub>5</sub> -H <sub>3</sub> PO <sub>4</sub> <sup>+2</sup> | 661.3338               | b <sub>6</sub>                                                | 997.5406 <sup>+2</sup>  | y <sub>18</sub> -H <sub>3</sub> PO <sub>4</sub> <sup>+2</sup> | 1276.6342 <sup>+2</sup> | y <sub>22</sub> <sup>+2</sup>                                 | 2152.1253 | b <sub>20</sub> -H <sub>3</sub> PO <sub>4</sub> |
| 328.6362 <sup>+2</sup> | y <sub>5</sub> <sup>+2</sup>                                 | 666.3348 <sup>+2</sup> | y <sub>12</sub> -H <sub>3</sub> PO <sub>4</sub> <sup>+2</sup> | 1001.4898               | y <sub>9</sub> -H <sub>3</sub> PO <sub>4</sub>                | 1298.5988               | y <sub>11</sub>                                               | 2179.0828 | y <sub>19</sub>                                 |
| 331.1705 <sup>+2</sup> | b <sub>6</sub> <sup>+2</sup>                                 | 671.3545 <sup>+2</sup> | b <sub>12</sub> <sup>+2</sup>                                 | 1010.5452               | b <sub>9</sub>                                                | 1320.1503 <sup>+2</sup> | MH <sup>+2</sup>                                              | 2209.2009 | y <sub>20</sub> -H <sub>3</sub> PO <sub>4</sub> |
| 333.1227               | b <sub>3</sub>                                               | 672.3311               | y <sub>6</sub> -H <sub>3</sub> PO <sub>4</sub>                | 1012.4347               | y <sub>8</sub>                                                | 1331.6624               | y <sub>12</sub> -H <sub>3</sub> PO <sub>4</sub>               | 2250.1022 | b <sub>20</sub>                                 |
| 336.6692 <sup>+2</sup> | y <sub>6</sub> -H <sub>3</sub> PO <sub>4</sub> <sup>+2</sup> | 706.8731 <sup>+2</sup> | b <sub>13</sub> <sup>+2</sup>                                 | 1027.0321 <sup>+2</sup> | b <sub>19</sub> -H <sub>3</sub> PO <sub>4</sub> <sup>+2</sup> | 1341.7017               | b <sub>12</sub>                                               | 2281.1679 | b <sub>21</sub> -H <sub>3</sub> PO <sub>4</sub> |
| 385.6577 <sup>+2</sup> | y <sub>6</sub> <sup>+2</sup>                                 | 715.3233 <sup>+2</sup> | y <sub>12</sub> <sup>+2</sup>                                 | 1041.0566 <sup>+2</sup> | y <sub>19</sub> -H <sub>3</sub> PO <sub>4</sub> <sup>+2</sup> | 1412.7389               | b <sub>13</sub>                                               | 2307.1778 | y <sub>20</sub>                                 |
| 390.1983               | y <sub>3</sub>                                               | 716.8587 <sup>+2</sup> | y <sub>13</sub> -H <sub>3</sub> PO <sub>4</sub> <sup>+2</sup> | 1046.5290 <sup>+2</sup> | y <sub>18</sub> <sup>+2</sup>                                 | 1429.6393               | y <sub>12</sub>                                               | 2323.2438 | y <sub>21</sub> -H <sub>3</sub> PO <sub>4</sub> |
| 399.7000 <sup>+2</sup> | b <sub>7</sub> <sup>+2</sup>                                 | 765.8471 <sup>+2</sup> | y <sub>13</sub> <sup>+2</sup>                                 | 1076.0205 <sup>+2</sup> | b <sub>19</sub> <sup>+2</sup>                                 | 1432.7101               | y <sub>13</sub> -H <sub>3</sub> PO <sub>4</sub>               | 2379.1448 | b <sub>21</sub>                                 |
| 401.1905 <sup>+2</sup> | y <sub>7</sub> -H <sub>3</sub> PO <sub>4</sub> <sup>+2</sup> | 766.3929 <sup>+2</sup> | y <sub>14</sub> -H <sub>3</sub> PO <sub>4</sub> <sup>+2</sup> | 1076.5663 <sup>+2</sup> | b <sub>20</sub> -H <sub>3</sub> PO <sub>4</sub> <sup>+2</sup> | 1530.687                | y <sub>13</sub>                                               | 2395.2108 | b <sub>22</sub> -H <sub>3</sub> PO <sub>4</sub> |
| 450.1789 <sup>+2</sup> | y <sub>7</sub> <sup>+2</sup>                                 | 770.308                | y <sub>6</sub>                                                | 1090.0451 <sup>+2</sup> | y <sub>19</sub> <sup>+2</sup>                                 | 1531.7785               | y <sub>14</sub> -H <sub>3</sub> PO <sub>4</sub>               | 2421.2207 | y <sub>21</sub>                                 |
| 456.2420 <sup>+2</sup> | b <sub>8</sub> <sup>+2</sup>                                 | 770.9205 <sup>+2</sup> | b <sub>14</sub> <sup>+2</sup>                                 | 1099.4667               | y <sub>9</sub>                                                | 1540.8338               | b <sub>14</sub>                                               | 2454.2843 | y <sub>22</sub> -H <sub>3</sub> PO <sub>4</sub> |
| 457.7325 <sup>+2</sup> | y <sub>8</sub> -H <sub>3</sub> PO <sub>4</sub> <sup>+2</sup> | 798.3927               | b <sub>7</sub>                                                | 1105.1041 <sup>+2</sup> | y <sub>20</sub> -H <sub>3</sub> PO <sub>4</sub> <sup>+2</sup> | 1627.8658               | b <sub>15</sub>                                               | 2493.1877 | b <sub>22</sub>                                 |
| 461.2177               | b <sub>4</sub>                                               | 801.3737               | y <sub>7</sub> -H <sub>3</sub> PO <sub>4</sub>                | 1109.6136               | b <sub>10</sub>                                               | 1629.7554               | y <sub>14</sub>                                               | 2541.3164 | MH-H <sub>3</sub> PO <sub>4</sub>               |
| 489.2667               | y <sub>4</sub>                                               | 814.4366 <sup>+2</sup> | b <sub>15</sub> <sup>+2</sup>                                 | 1125.5547 <sup>+2</sup> | b <sub>20</sub> <sup>+2</sup>                                 | 1630.8469               | y <sub>15</sub> -H <sub>3</sub> PO <sub>4</sub>               | 2552.2612 | y <sub>22</sub>                                 |
| 501.2485 <sup>+2</sup> | y <sub>9</sub> -H <sub>3</sub> PO <sub>4</sub> <sup>+2</sup> | 815.3813 <sup>+2</sup> | y <sub>14</sub> <sup>+2</sup>                                 | 1129.5848               | y <sub>10</sub> -H <sub>3</sub> PO <sub>4</sub>               | 1728.8238               | y <sub>15</sub>                                               | 2639.2932 | MH                                              |
| 505.7762 <sup>+2</sup> | b <sub>9</sub> <sup>+2</sup>                                 | 815.9271 <sup>+2</sup> | y <sub>15</sub> -H <sub>3</sub> PO <sub>4</sub> <sup>+2</sup> | 1141.0876 <sup>+2</sup> | b <sub>21</sub> -H <sub>3</sub> PO <sub>4</sub> <sup>+2</sup> | 1740.9499               | b <sub>16</sub>                                               |           |                                                 |
| 506.7210 <sup>+2</sup> | y <sub>8</sub> <sup>+2</sup>                                 | 864.9155 <sup>+2</sup> | y <sub>15</sub> <sup>+2</sup>                                 | 1154.0925 <sup>+2</sup> | y <sub>20</sub> <sup>+2</sup>                                 | 1743.9309               | y <sub>16</sub> -H <sub>3</sub> PO <sub>4</sub>               |           |                                                 |
| 548.2497               | b <sub>5</sub>                                               | 870.9786 <sup>+2</sup> | b <sub>16</sub> <sup>+2</sup>                                 | 1162.1256 <sup>+2</sup> | y <sub>21</sub> -H <sub>3</sub> PO <sub>4</sub> <sup>+2</sup> | 1841.9078               | y <sub>16</sub>                                               |           |                                                 |

MS/MS Fragmentation of **AADEEAFEDNSEEYIR**

Found in **IPI00022744.5**, Tax\_Id=9606 Gene\_Symbol=CSE1L Isoform 1 of Exportin-2

Match to Query 7174: 1914.824080 from(958.419316,2+)

Title: Elution from: 34.21 to 38.11 period: FD070412dMavril02.raw experiment: 1 cycles: 1 precIntensity: 258309.0 FinneganScanNumber: 2345

Data file D:\projecttemp\FD080412dM\FD070412dMavril02.msm

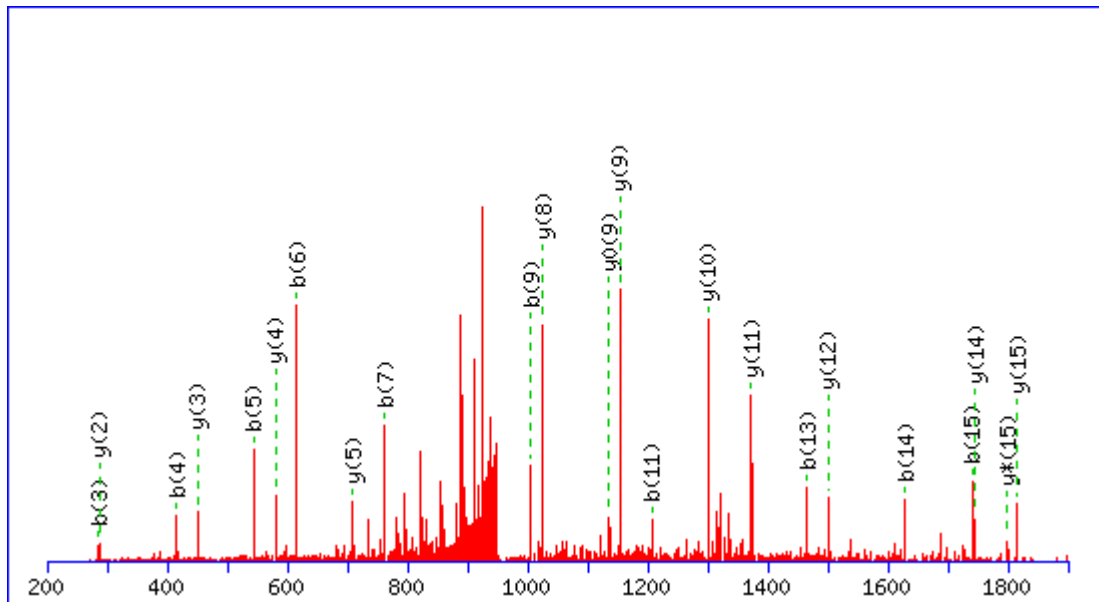

**Monoisotopic mass of neutral peptide Mr(calc):** 1914.811874

**Fixed modifications:** Carbamidomethyl (C)

**Variable modifications:**

**N-term :** Dimethyl (N-term)

**Ions Score:** 84 **Expect:** 1.6e-07

**Matches (Bold Red):** 23/152 fragment ions using 46 most intense peaks

| #  | b           | b <sup>++</sup> | b*          | b <sup>*++</sup> | b <sup>0</sup> | b <sup>0++</sup> | Seq. | y           | y <sup>++</sup> | y*          | y <sup>*++</sup> | y <sup>0</sup> | y <sup>0++</sup> | #  |
|----|-------------|-----------------|-------------|------------------|----------------|------------------|------|-------------|-----------------|-------------|------------------|----------------|------------------|----|
| 1  | 100.075686  | 50.541481       |             |                  |                |                  | A    |             |                 |             |                  |                |                  | 16 |
| 2  | 171.112800  | 86.060038       |             |                  |                |                  | A    | 1816.750793 | 908.879035      | 1799.724244 | 900.365760       | 1798.740228    | 899.873752       | 15 |
| 3  | 286.139743  | 143.573510      |             |                  | 268.129178     | 134.568227       | D    | 1745.713679 | 873.360478      | 1728.687130 | 864.847203       | 1727.703114    | 864.355195       | 14 |
| 4  | 415.182336  | 208.094806      |             |                  | 397.171771     | 199.089524       | E    | 1630.686736 | 815.847006      | 1613.660187 | 807.333732       | 1612.676171    | 806.841724       | 13 |
| 5  | 544.224929  | 272.616103      |             |                  | 526.214364     | 263.610820       | E    | 1501.644143 | 751.325710      | 1484.617594 | 742.812435       | 1483.633578    | 742.320427       | 12 |
| 6  | 615.262043  | 308.134660      |             |                  | 597.251478     | 299.129377       | A    | 1372.601550 | 686.804413      | 1355.575001 | 678.291139       | 1354.590985    | 677.799131       | 11 |
| 7  | 762.330457  | 381.668867      |             |                  | 744.319892     | 372.663584       | F    | 1301.564436 | 651.285856      | 1284.537887 | 642.772582       | 1283.553871    | 642.280574       | 10 |
| 8  | 891.373050  | 446.190163      |             |                  | 873.362485     | 437.184881       | E    | 1154.496022 | 577.751649      | 1137.469473 | 569.238375       | 1136.485457    | 568.746367       | 9  |
| 9  | 1006.399993 | 503.703635      |             |                  | 988.389428     | 494.698352       | D    | 1025.453429 | 513.230353      | 1008.426880 | 504.717078       | 1007.442864    | 504.225070       | 8  |
| 10 | 1120.442920 | 560.725098      | 1103.416371 | 552.211824       | 1102.432355    | 551.719816       | N    | 910.426486  | 455.716881      | 893.399937  | 447.203607       | 892.415921     | 446.711599       | 7  |
| 11 | 1207.474948 | 604.241112      | 1190.448399 | 595.727838       | 1189.464383    | 595.235830       | S    | 796.383559  | 398.695418      | 779.357010  | 390.182143       | 778.372994     | 389.690135       | 6  |
| 12 | 1336.517541 | 668.762409      | 1319.490992 | 660.249134       | 1318.506976    | 659.757126       | E    | 709.351531  | 355.179404      | 692.324982  | 346.666129       | 691.340966     | 346.174121       | 5  |
| 13 | 1465.560134 | 733.283705      | 1448.533585 | 724.770431       | 1447.549569    | 724.278423       | E    | 580.308938  | 290.658107      | 563.282389  | 282.144833       | 562.298373     | 281.652825       | 4  |
| 14 | 1628.623463 | 814.815370      | 1611.596914 | 806.302095       | 1610.612898    | 805.810087       | Y    | 451.266345  | 226.136810      | 434.239796  | 217.623536       |                |                  | 3  |
| 15 | 1741.707527 | 871.357402      | 1724.680978 | 862.844127       | 1723.696962    | 862.352119       | I    | 288.203016  | 144.605146      | 271.176467  | 136.091871       |                |                  | 2  |
| 16 |             |                 |             |                  |                |                  | R    | 175.118952  | 88.063114       | 158.092403  | 79.549839        |                |                  | 1  |

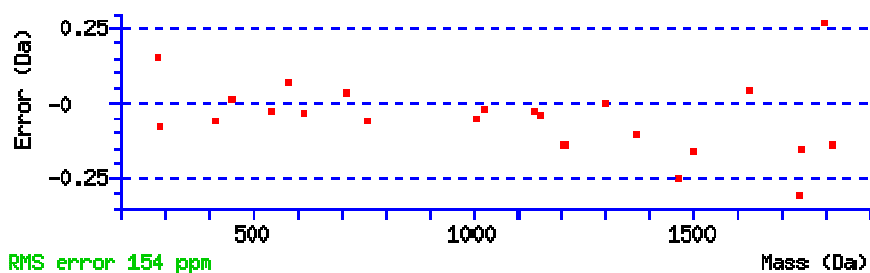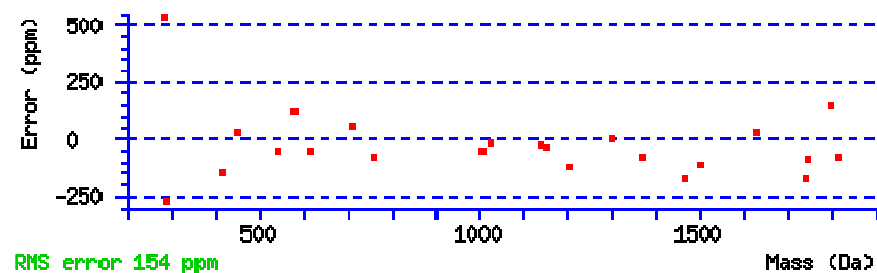

All matches to this query

| Score | Mr(calc):   | Delta    | Sequence                         |
|-------|-------------|----------|----------------------------------|
| 84.1  | 1914.811874 | 0.012206 | <a href="#">AADEEAFEDNSEEYIR</a> |
| 0.5   | 1914.823349 | 0.000731 | <a href="#">MGASMRTEEMPVRTK</a>  |

MS/MS Fragmentation of **ACGNFGIPCELR**

Found in **IPI00217223.1**, Tax\_Id=9606 Gene\_Symbol=PAICS Multifunctional protein ADE2

Match to Query 4636: 1420.671368 from(711.342960,2+)

Title: Elution from: 36.33 to 40.23 period: FD070412dMavril05.raw experiment: 1 cycles: 1 precIntensity: 471486.5 FinneganScanNumber: 2440

Data file D:\projecttemp\FD080412dM\FD070412dMavril05.msm

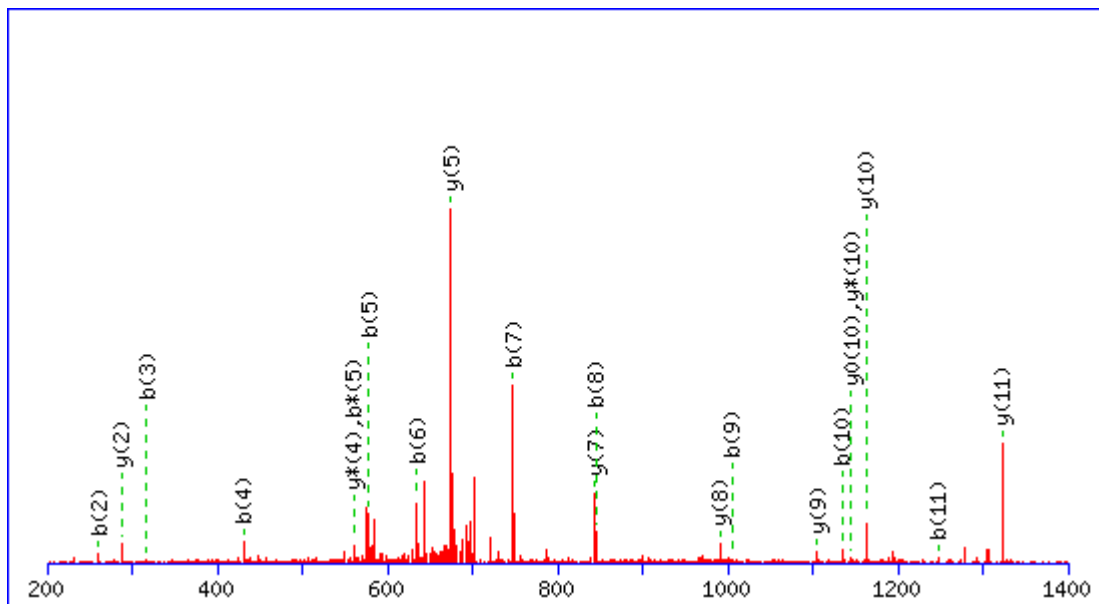

**Monoisotopic mass of neutral peptide Mr(calc):** 1420.659134

**Fixed modifications:** Carbamidomethyl (C)

**Variable modifications:**

**N-term :** Dimethyl (N-term)

**Ions Score:** 56 **Expect:** 0.00038

**Matches (Bold Red):** 21/104 fragment ions using 35 most intense peaks

| #  | b                  | b <sup>++</sup> | b*                | b <sup>*++</sup> | b <sup>0</sup> | b <sup>0++</sup> | Seq. | y                  | y <sup>++</sup> | y*                 | y <sup>*++</sup> | y <sup>0</sup>     | y <sup>0++</sup> | #  |
|----|--------------------|-----------------|-------------------|------------------|----------------|------------------|------|--------------------|-----------------|--------------------|------------------|--------------------|------------------|----|
| 1  | 100.075686         | 50.541481       |                   |                  |                |                  | A    |                    |                 |                    |                  |                    |                  | 12 |
| 2  | <b>260.106335</b>  | 130.556805      |                   |                  |                |                  | C    | <b>1322.598004</b> | 661.802640      | 1305.571455        | 653.289366       | 1304.587439        | 652.797358       | 11 |
| 3  | <b>317.127799</b>  | 159.067537      |                   |                  |                |                  | G    | <b>1162.567355</b> | 581.787316      | <b>1145.540806</b> | 573.274041       | <b>1144.556790</b> | 572.782033       | 10 |
| 4  | <b>431.170726</b>  | 216.089001      | 414.144177        | 207.575727       |                |                  | N    | <b>1105.545891</b> | 553.276584      | 1088.519342        | 544.763309       | 1087.535326        | 544.271301       | 9  |
| 5  | <b>578.239140</b>  | 289.623208      | <b>561.212591</b> | 281.109934       |                |                  | F    | <b>991.502964</b>  | 496.255120      | 974.476415         | 487.741846       | 973.492399         | 487.249838       | 8  |
| 6  | <b>635.260604</b>  | 318.133940      | 618.234055        | 309.620666       |                |                  | G    | <b>844.434550</b>  | 422.720913      | 827.408001         | 414.207639       | 826.423985         | 413.715631       | 7  |
| 7  | <b>748.344668</b>  | 374.675972      | 731.318119        | 366.162698       |                |                  | I    | 787.413086         | 394.210181      | 770.386537         | 385.696907       | 769.402521         | 385.204899       | 6  |
| 8  | <b>845.397432</b>  | 423.202354      | 828.370883        | 414.689080       |                |                  | P    | <b>674.329022</b>  | 337.668149      | 657.302473         | 329.154875       | 656.318457         | 328.662867       | 5  |
| 9  | <b>1005.428081</b> | 503.217679      | 988.401532        | 494.704404       |                |                  | C    | 577.276258         | 289.141767      | <b>560.249709</b>  | 280.628493       | 559.265693         | 280.136485       | 4  |
| 10 | <b>1134.470674</b> | 567.738975      | 1117.444125       | 559.225701       | 1116.460109    | 558.733693       | E    | 417.245609         | 209.126442      | 400.219060         | 200.613168       | 399.235044         | 200.121160       | 3  |
| 11 | <b>1247.554738</b> | 624.281007      | 1230.528189       | 615.767733       | 1229.544173    | 615.275725       | L    | <b>288.203016</b>  | 144.605146      | 271.176467         | 136.091871       |                    |                  | 2  |
| 12 |                    |                 |                   |                  |                |                  | R    | 175.118952         | 88.063114       | 158.092403         | 79.549839        |                    |                  | 1  |

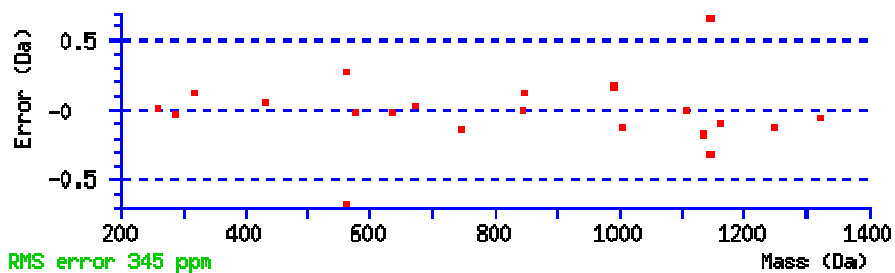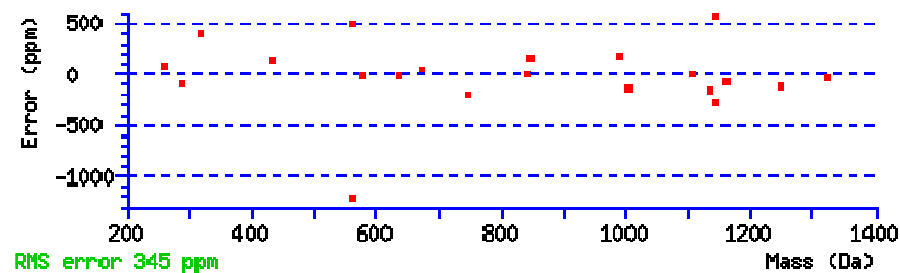

All matches to this query

| Score | Mr(calc):   | Delta     | Sequence                        |
|-------|-------------|-----------|---------------------------------|
| 56.5  | 1420.659134 | 0.012234  | <a href="#">ACGNFGIPCELR</a>    |
| 10.0  | 1420.666336 | 0.005032  | <a href="#">VCSARVCERER</a>     |
| 6.4   | 1420.684738 | -0.013370 | <a href="#">FAQSSNYAQHLR</a>    |
| 4.6   | 1419.663025 | 1.008343  | <a href="#">PGDPGPSPNADSPGK</a> |
| 3.6   | 1420.680237 | -0.008869 | <a href="#">DELQMMQKDKR</a>     |
| 2.8   | 1419.670395 | 1.000973  | <a href="#">QOTEEMWEVLK</a>     |
| 2.7   | 1419.659851 | 1.011517  | <a href="#">PCVGMREAELSR</a>    |

|     |             |           |                                |
|-----|-------------|-----------|--------------------------------|
| 2.2 | 1418.661255 | 2.010113  | <a href="#">APPPTPAPSGCDPR</a> |
| 1.7 | 1420.675522 | -0.004154 | <a href="#">EDEEKMADLGLK</a>   |
| 1.4 | 1418.652466 | 2.018902  | <a href="#">AEGEDGEKEEKAK</a>  |

---

MS/MS Fragmentation of **AENQVLAMR**

Found in **IPI00218200.8**, Tax\_Id=9606 Gene\_Symbol=BCAP31 B-cell receptor-associated protein 31

Match to Query 3605: 1058.551428 from(530.282990,2+)

Title: Elution from: 24.81 to 28.71 period: FD070412dMavril07.raw experiment: 1 cycles: 1 precIntensity: 1362520.7 FinneganScanNumber: 1696

Data file D:\projecttemp\FD080412dM\FD070412dMavril07.msm

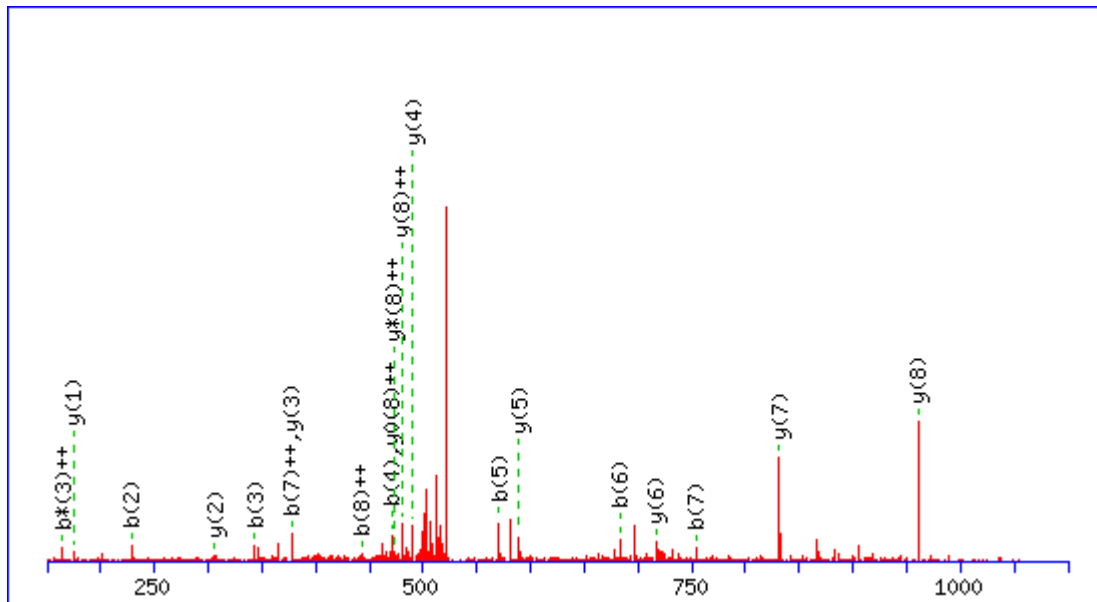

**Monoisotopic mass of neutral peptide Mr(calc):** 1058.554230

**Fixed modifications:** Carbamidomethyl (C)

**Variable modifications:**

**N-term :** Dimethyl (N-term)

**Ions Score:** 43 **Expect:** 0.015

**Matches (Bold Red):** 20/76 fragment ions using 71 most intense peaks

| # | b                 | b <sup>++</sup>   | b*         | b <sup>*++</sup>  | b <sup>0</sup> | b <sup>0++</sup> | Seq. | y                 | y <sup>++</sup>   | y*         | y <sup>*++</sup>  | y <sup>0</sup> | y <sup>0++</sup>  | # |
|---|-------------------|-------------------|------------|-------------------|----------------|------------------|------|-------------------|-------------------|------------|-------------------|----------------|-------------------|---|
| 1 | 100.075686        | 50.541481         |            |                   |                |                  | A    |                   |                   |            |                   |                |                   | 9 |
| 2 | <b>229.118279</b> | 115.062777        |            |                   | 211.107714     | 106.057495       | E    | <b>960.493127</b> | <b>480.750202</b> | 943.466578 | <b>472.236927</b> | 942.482562     | <b>471.744919</b> | 8 |
| 3 | <b>343.161206</b> | 172.084241        | 326.134657 | <b>163.570966</b> | 325.150641     | 163.078958       | N    | <b>831.450534</b> | 416.228905        | 814.423985 | 407.715631        |                |                   | 7 |
| 4 | <b>471.219784</b> | 236.113530        | 454.193235 | 227.600256        | 453.209219     | 227.108248       | Q    | <b>717.407607</b> | 359.207442        | 700.381058 | 350.694167        |                |                   | 6 |
| 5 | <b>570.288198</b> | 285.647737        | 553.261649 | 277.134463        | 552.277633     | 276.642455       | V    | <b>589.349029</b> | 295.178153        | 572.322480 | 286.664878        |                |                   | 5 |
| 6 | <b>683.372262</b> | 342.189769        | 666.345713 | 333.676495        | 665.361697     | 333.184487       | L    | <b>490.280615</b> | 245.643946        | 473.254066 | 237.130671        |                |                   | 4 |
| 7 | <b>754.409376</b> | <b>377.708326</b> | 737.382827 | 369.195052        | 736.398811     | 368.703044       | A    | <b>377.196551</b> | 189.101913        | 360.170002 | 180.588639        |                |                   | 3 |
| 8 | 885.449861        | <b>443.228569</b> | 868.423312 | 434.715294        | 867.439296     | 434.223286       | M    | <b>306.159437</b> | 153.583357        | 289.132888 | 145.070082        |                |                   | 2 |
| 9 |                   |                   |            |                   |                |                  | R    | <b>175.118952</b> | 88.063114         | 158.092403 | 79.549840         |                |                   | 1 |

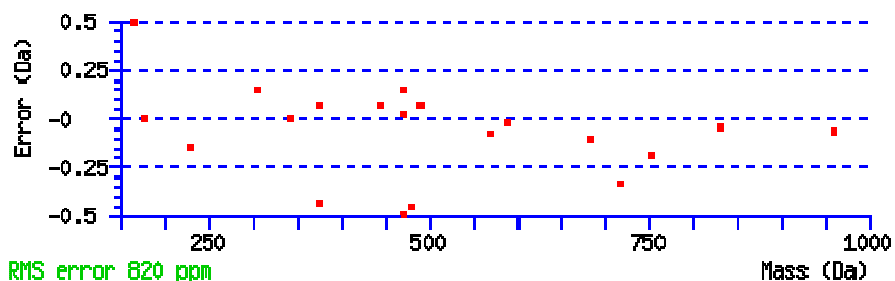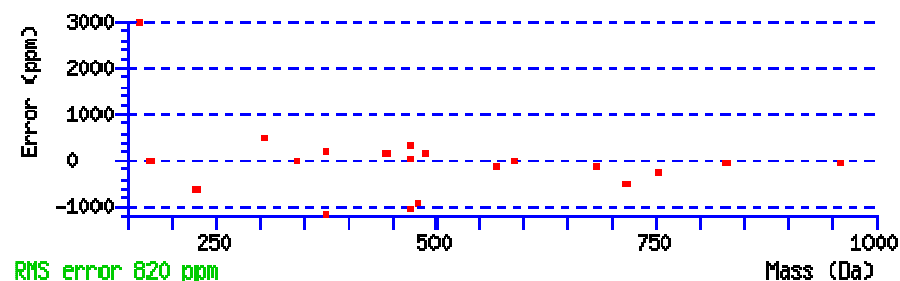

#### All matches to this query

| Score | Mr(calc):   | Delta     | Sequence                   |
|-------|-------------|-----------|----------------------------|
| 43.3  | 1058.554230 | -0.002802 | <a href="#">AENQVLAMR</a>  |
| 12.6  | 1058.560760 | -0.009332 | <a href="#">AEKKT PDDK</a> |
| 10.8  | 1058.560760 | -0.009332 | <a href="#">ISNGGLEEGK</a> |
| 9.6   | 1057.556305 | 0.995123  | <a href="#">PMGRAGSARR</a> |
| 7.6   | 1058.554230 | -0.002802 | <a href="#">AGASGKPEMR</a> |
| 7.5   | 1058.542999 | 0.008429  | <a href="#">LSPLGEEMR</a>  |
| 7.3   | 1058.546829 | 0.004599  | <a href="#">ARAEDLNSR</a>  |
| 7.0   | 1058.560730 | -0.009302 | <a href="#">AELEEREK</a>   |
| 6.5   | 1057.540375 | 1.011053  | <a href="#">LLDQGEDLR</a>  |
| 6.4   | 1058.546829 | 0.004599  | <a href="#">QKAENNSLR</a>  |





MS/MS Fragmentation of **AGMTHIVR**

Found in **IPI00550021.4**, Tax\_Id=9606 Gene\_Symbol=RPL3 60S ribosomal protein L3

Match to Query 3012: 911.500860 from(304.840896,3+)

Title: Elution from: 16.43 to 20.31 period: FD070412dMavril05.raw experiment: 1 cycles: 1 precIntensity: 178836.2 FinneganScanNumber: 948

Data file D:\projecttemp\FD080412dM\FD070412dMavril05.msm

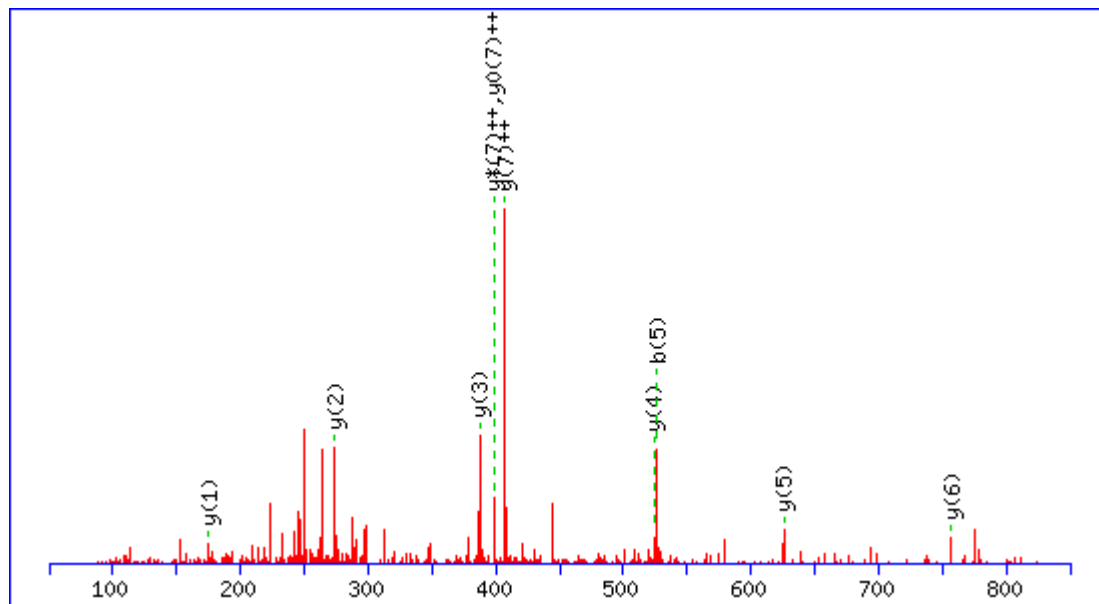

**Monoisotopic mass of neutral peptide Mr(calc):** 911.501099

**Fixed modifications:** Carbamidomethyl (C)

**Variable modifications:**

**N-term :** Dimethyl (N-term)

**Ions Score:** 41 **Expect:** 0.016

**Matches (Bold Red):** 10/56 fragment ions using 25 most intense peaks

| # | b          | b <sup>++</sup> | b <sup>0</sup> | b <sup>0++</sup> | Seq. | y          | y <sup>++</sup> | y <sup>*</sup> | y <sup>*++</sup> | y <sup>0</sup> | y <sup>0++</sup> | # |
|---|------------|-----------------|----------------|------------------|------|------------|-----------------|----------------|------------------|----------------|------------------|---|
| 1 | 100.075686 | 50.541481       |                |                  | A    |            |                 |                |                  |                |                  | 8 |
| 2 | 157.097150 | 79.052213       |                |                  | G    | 813.439970 | 407.223623      | 796.413421     | 398.710349       | 795.429405     | 398.218341       | 7 |
| 3 | 288.137635 | 144.572455      |                |                  | M    | 756.418506 | 378.712891      | 739.391957     | 370.199617       | 738.407941     | 369.707609       | 6 |
| 4 | 389.185314 | 195.096295      | 371.174749     | 186.091013       | T    | 625.378021 | 313.192649      | 608.351472     | 304.679374       | 607.367456     | 304.187366       | 5 |
| 5 | 526.244226 | 263.625751      | 508.233661     | 254.620469       | H    | 524.330342 | 262.668809      | 507.303793     | 254.155535       |                |                  | 4 |
| 6 | 639.328290 | 320.167783      | 621.317725     | 311.162501       | I    | 387.271430 | 194.139353      | 370.244881     | 185.626079       |                |                  | 3 |
| 7 | 738.396704 | 369.701990      | 720.386139     | 360.696708       | V    | 274.187366 | 137.597321      | 257.160817     | 129.084046       |                |                  | 2 |
| 8 |            |                 |                |                  | R    | 175.118952 | 88.063114       | 158.092403     | 79.549840        |                |                  | 1 |

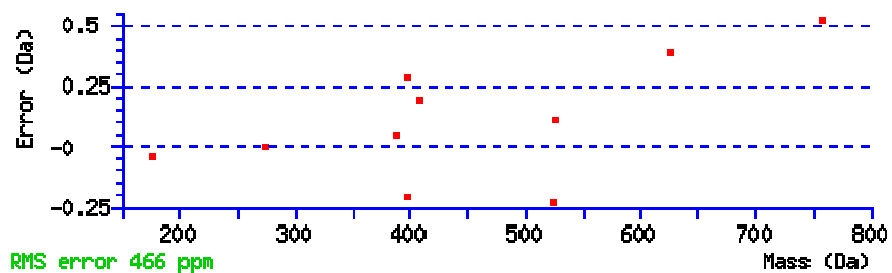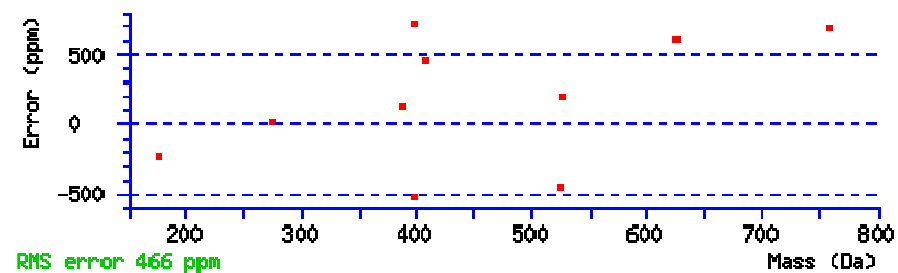

#### All matches to this query

| Score | Mr(calc):  | Delta     | Sequence                  |
|-------|------------|-----------|---------------------------|
| 41.4  | 911.501099 | -0.000239 | <a href="#">AGMTHIVR</a>  |
| 12.7  | 909.499344 | 2.001516  | <a href="#">AYMNLVK</a>   |
| 8.8   | 909.491974 | 2.008886  | <a href="#">PGPGSKDPK</a> |
| 8.8   | 911.496368 | 0.004492  | <a href="#">ASSLSTYK</a>  |
| 8.6   | 910.498459 | 1.002401  | <a href="#">PGTLRDPR</a>  |
| 6.8   | 911.507599 | -0.006739 | <a href="#">ASEALHTK</a>  |
| 4.4   | 911.493713 | 0.007147  | <a href="#">RPGDVNVR</a>  |
| 4.3   | 911.501099 | -0.000239 | <a href="#">GMLHALVR</a>  |
| 4.0   | 909.499359 | 2.001501  | <a href="#">AITAMGFK</a>  |
| 3.6   | 909.499344 | 2.001516  | <a href="#">AIYLMQK</a>   |

MS/MS Fragmentation of **AGNLGGGVVTIER**

Found in **IPI00219153.4**, Tax\_Id=9606 Gene\_Symbol=RPL22 60S ribosomal protein L22

Match to Query 4420: 1269.705644 from(635.860098,2+)

Title: Elution from: 29.90 to 33.75 period: FD070412dMavril06.raw experiment: 1 cycles: 1 precIntensity: 737127.6 FinneganScanNumber: 1922

Data file D:\projecttemp\FD080412dM\FD070412dMavril06.msm

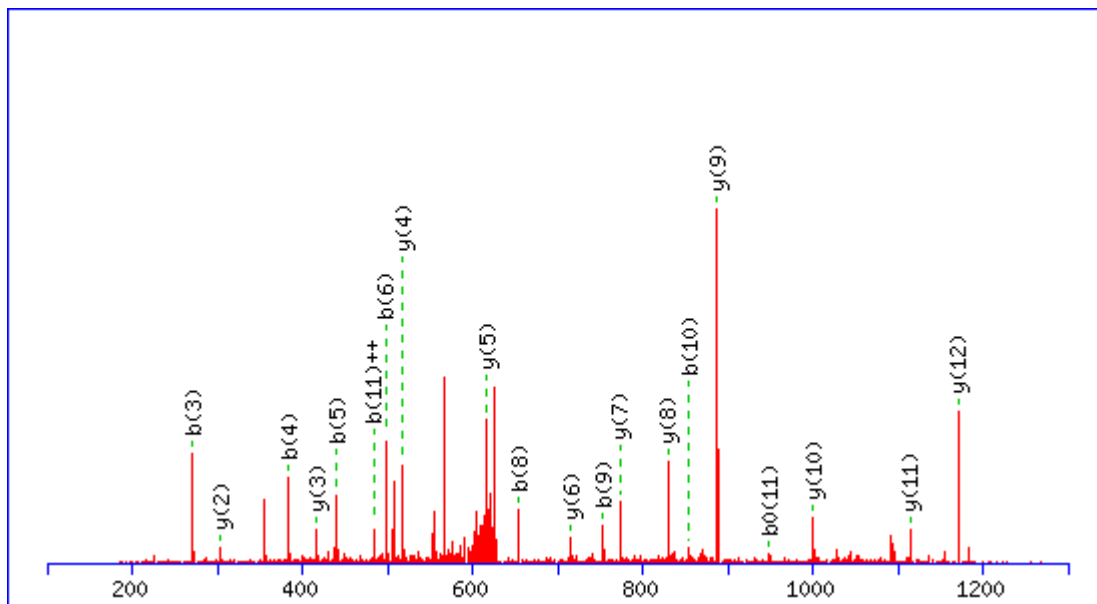

**Monoisotopic mass of neutral peptide Mr(calc):** 1269.704102

**Fixed modifications:** Carbamidomethyl (C)

**Variable modifications:**

**N-term :** Dimethyl (N-term)

**Ions Score:** 82 **Expect:** 1.7e-06

**Matches (Bold Red):** 20/120 fragment ions using 39 most intense peaks

| #  | b           | b <sup>++</sup> | b*          | b <sup>*++</sup> | b <sup>0</sup> | b <sup>0++</sup> | Seq. | y           | y <sup>++</sup> | y*          | y <sup>*++</sup> | y <sup>0</sup> | y <sup>0++</sup> | #  |
|----|-------------|-----------------|-------------|------------------|----------------|------------------|------|-------------|-----------------|-------------|------------------|----------------|------------------|----|
| 1  | 100.075686  | 50.541481       |             |                  |                |                  | A    |             |                 |             |                  |                |                  | 13 |
| 2  | 157.097150  | 79.052213       |             |                  |                |                  | G    | 1171.642963 | 586.325120      | 1154.616414 | 577.811845       | 1153.632398    | 577.319837       | 12 |
| 3  | 271.140077  | 136.073677      | 254.113528  | 127.560402       |                |                  | N    | 1114.621499 | 557.814388      | 1097.594950 | 549.301113       | 1096.610934    | 548.809105       | 11 |
| 4  | 384.224141  | 192.615709      | 367.197592  | 184.102434       |                |                  | L    | 1000.578572 | 500.792924      | 983.552023  | 492.279649       | 982.568007     | 491.787641       | 10 |
| 5  | 441.245605  | 221.126441      | 424.219056  | 212.613166       |                |                  | G    | 887.494508  | 444.250892      | 870.467959  | 435.737617       | 869.483943     | 435.245610       | 9  |
| 6  | 498.267069  | 249.637172      | 481.240520  | 241.123898       |                |                  | G    | 830.473044  | 415.740160      | 813.446495  | 407.226885       | 812.462479     | 406.734877       | 8  |
| 7  | 555.288533  | 278.147905      | 538.261984  | 269.634630       |                |                  | G    | 773.451580  | 387.229428      | 756.425031  | 378.716153       | 755.441015     | 378.224145       | 7  |
| 8  | 654.356947  | 327.682112      | 637.330398  | 319.168837       |                |                  | V    | 716.430116  | 358.718696      | 699.403567  | 350.205421       | 698.419551     | 349.713414       | 6  |
| 9  | 753.425361  | 377.216318      | 736.398812  | 368.703044       |                |                  | V    | 617.361702  | 309.184489      | 600.335153  | 300.671215       | 599.351137     | 300.179207       | 5  |
| 10 | 854.473040  | 427.740158      | 837.446491  | 419.226883       | 836.462475     | 418.734875       | T    | 518.293288  | 259.650282      | 501.266739  | 251.137008       | 500.282723     | 250.645000       | 4  |
| 11 | 967.557104  | 484.282190      | 950.530555  | 475.768915       | 949.546539     | 475.276907       | I    | 417.245609  | 209.126442      | 400.219060  | 200.613168       | 399.235044     | 200.121160       | 3  |
| 12 | 1096.599697 | 548.803487      | 1079.573148 | 540.290212       | 1078.589132    | 539.798204       | E    | 304.161545  | 152.584410      | 287.134996  | 144.071136       | 286.150980     | 143.579128       | 2  |
| 13 |             |                 |             |                  |                |                  | R    | 175.118952  | 88.063114       | 158.092403  | 79.549839        |                |                  | 1  |

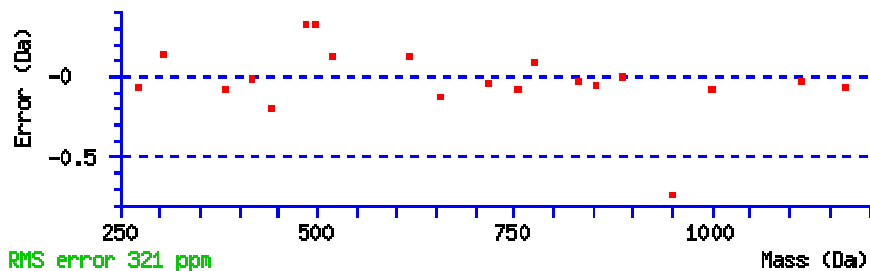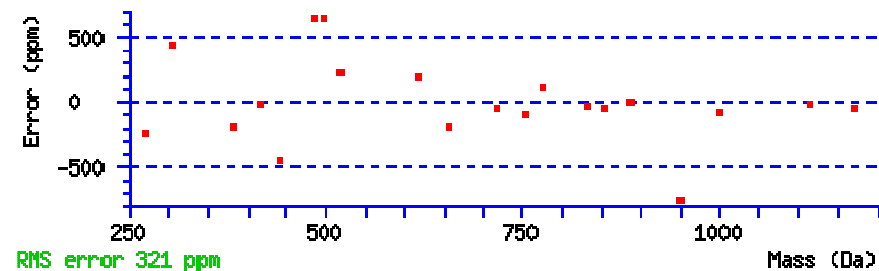

All matches to this query

| Score | Mr(calc):   | Delta    | Sequence                      |
|-------|-------------|----------|-------------------------------|
| 82.4  | 1269.704102 | 0.001542 | <a href="#">AGNLGGGVVTIER</a> |
| 23.6  | 1269.704056 | 0.001588 | <a href="#">KNLNREDTPK</a>    |
| 21.0  | 1269.704056 | 0.001588 | <a href="#">KNLNREDTPK</a>    |
| 10.4  | 1269.700226 | 0.005418 | <a href="#">IEICLEPLOK</a>    |
| 9.9   | 1269.704056 | 0.001588 | <a href="#">AQKPLSTAAAER</a>  |
| 9.4   | 1269.704086 | 0.001558 | <a href="#">VKGGRGDISEPK</a>  |

|     |             |          |                                 |
|-----|-------------|----------|---------------------------------|
| 9.1 | 1269.704071 | 0.001573 | <a href="#">IIEGGAAQKDGR</a>    |
| 9.0 | 1269.704056 | 0.001588 | <a href="#">AKQNQQENVK</a>      |
| 7.6 | 1267.688446 | 2.017198 | <a href="#">PGSAGGPKVGAGASK</a> |
| 7.3 | 1268.708847 | 0.996797 | <a href="#">LQVAGEITTGPR</a>    |

MS/MS Fragmentation of **AIFQTIQNR**

Found in **IPI00007402.3**, Tax\_Id=9606 Gene\_Symbol=IPO7 Importin-7

Match to Query 4606: 1117.628194 from(559.821373,2+)

Title: Elution from: 29.05 to 32.90 period: FD070412dMavril02.raw experiment: 1 cycles: 1 precIntensity: 4807177.5 FinneganScanNumber: 1945

Data file D:\projecttemp\FD080412dM\FD070412dMavril02.msm

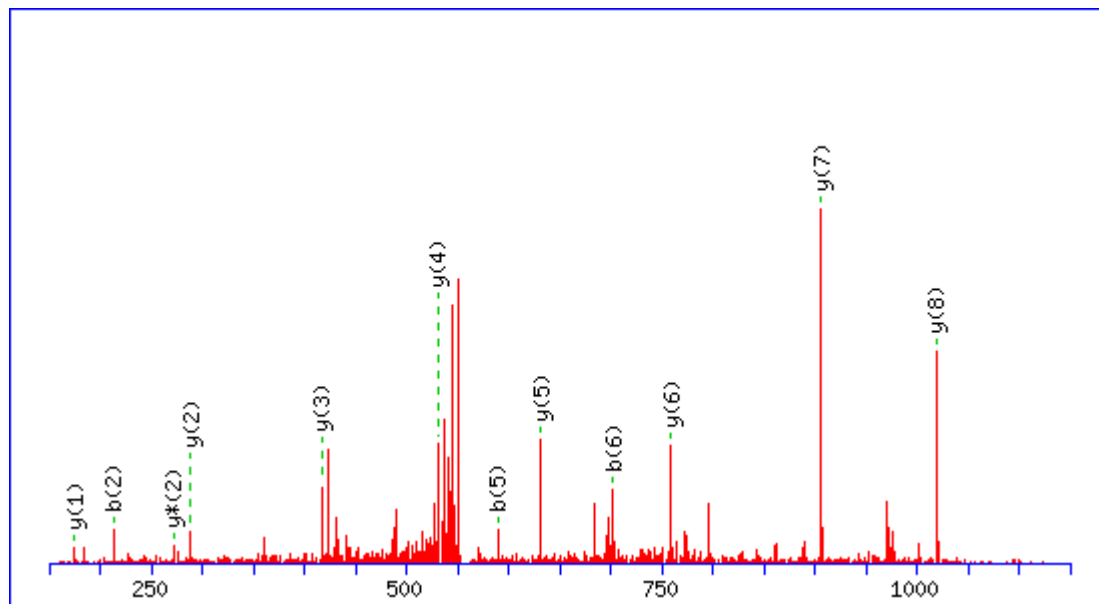

**Monoisotopic mass of neutral peptide Mr(calc):** 1117.624374

**Fixed modifications:** Carbamidomethyl (C)

**Variable modifications:**

**N-term :** Dimethyl (N-term)

**Ions Score:** 46 **Expect:** 0.012

**Matches (Bold Red):** 12/74 fragment ions using 31 most intense peaks

| # | b                 | b <sup>++</sup> | b <sup>*</sup> | b <sup>*++</sup> | b <sup>0</sup> | b <sup>0++</sup> | Seq. | y                  | y <sup>++</sup> | y <sup>*</sup>    | y <sup>*++</sup> | y <sup>0</sup> | y <sup>0++</sup> | # |
|---|-------------------|-----------------|----------------|------------------|----------------|------------------|------|--------------------|-----------------|-------------------|------------------|----------------|------------------|---|
| 1 | 100.075686        | 50.541481       |                |                  |                |                  | A    |                    |                 |                   |                  |                |                  | 9 |
| 2 | <b>213.159750</b> | 107.083513      |                |                  |                |                  | I    | <b>1019.563256</b> | 510.285266      | 1002.536707       | 501.771992       | 1001.552691    | 501.279984       | 8 |
| 3 | 360.228164        | 180.617720      |                |                  |                |                  | F    | <b>906.479192</b>  | 453.743234      | 889.452643        | 445.229960       | 888.468627     | 444.737952       | 7 |
| 4 | 488.286742        | 244.647009      | 471.260193     | 236.133734       |                |                  | Q    | <b>759.410778</b>  | 380.209027      | 742.384229        | 371.695753       | 741.400213     | 371.203745       | 6 |
| 5 | <b>589.334421</b> | 295.170849      | 572.307872     | 286.657574       | 571.323856     | 286.165566       | T    | <b>631.352200</b>  | 316.179738      | 614.325651        | 307.666464       | 613.341635     | 307.174456       | 5 |
| 6 | <b>702.418485</b> | 351.712881      | 685.391936     | 343.199606       | 684.407920     | 342.707598       | I    | <b>530.304521</b>  | 265.655899      | 513.277972        | 257.142624       |                |                  | 4 |
| 7 | 830.477063        | 415.742170      | 813.450514     | 407.228895       | 812.466498     | 406.736887       | Q    | <b>417.220457</b>  | 209.113867      | 400.193908        | 200.600592       |                |                  | 3 |
| 8 | 944.519990        | 472.763633      | 927.493441     | 464.250359       | 926.509425     | 463.758351       | N    | <b>289.161879</b>  | 145.084577      | <b>272.135330</b> | 136.571303       |                |                  | 2 |
| 9 |                   |                 |                |                  |                |                  | R    | <b>175.118952</b>  | 88.063114       | 158.092403        | 79.549840        |                |                  | 1 |

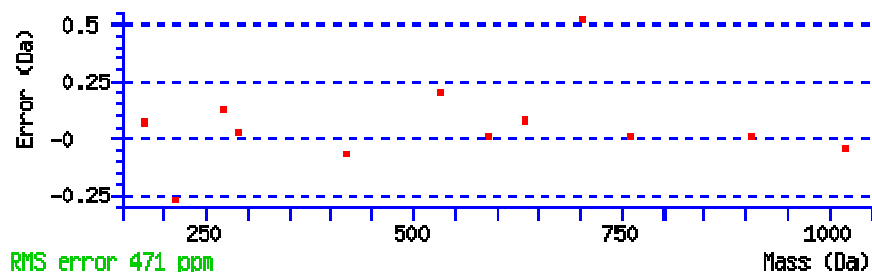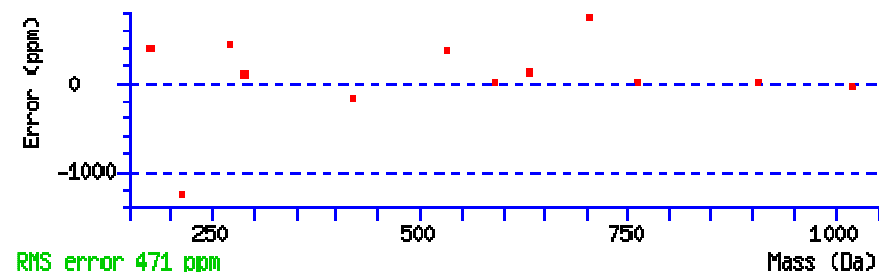

All matches to this query

| Score | Mr(calc):   | Delta     | Sequence                   |
|-------|-------------|-----------|----------------------------|
| 46.0  | 1117.624374 | 0.003820  | <a href="#">AIFQTIQNR</a>  |
| 20.4  | 1117.624374 | 0.003820  | <a href="#">AINVFVSANR</a> |
| 14.5  | 1117.627716 | 0.000478  | <a href="#">MLKRELER</a>   |
| 14.3  | 1117.627716 | 0.000478  | <a href="#">MLQERKAAK</a>  |
| 13.9  | 1117.638962 | -0.010768 | <a href="#">MRILANKTR</a>  |
| 13.3  | 1117.627716 | 0.000478  | <a href="#">MKAAQKEIR</a>  |
| 10.7  | 1115.629852 | 1.998342  | <a href="#">DRSNVLSGIK</a> |
| 9.4   | 1117.620331 | 0.007863  | <a href="#">NKSSLSRGNK</a> |
| 9.3   | 1115.626007 | 2.002187  | <a href="#">PLMEKVEVK</a>  |
| 9.1   | 1116.632462 | 0.995732  | <a href="#">NLAKDMKNK</a>  |



MS/MS Fragmentation of **AIQDPAFSDGIR**

Found in **IPI00179298.5**, Tax\_Id=9606 Gene\_Symbol=HUWE1 482 kDa protein

Match to Query 5798: 1317.687568 from(659.851060,2+)

Title: Elution from: 32.32 to 36.16 period: FD070412dMavril01.raw experiment: 1 cycles: 1 precIntensity: 472885.3 FinneganScanNumber: 2132

Data file D:\projecttemp\FD080412dM\FD070412dMavril01.msm

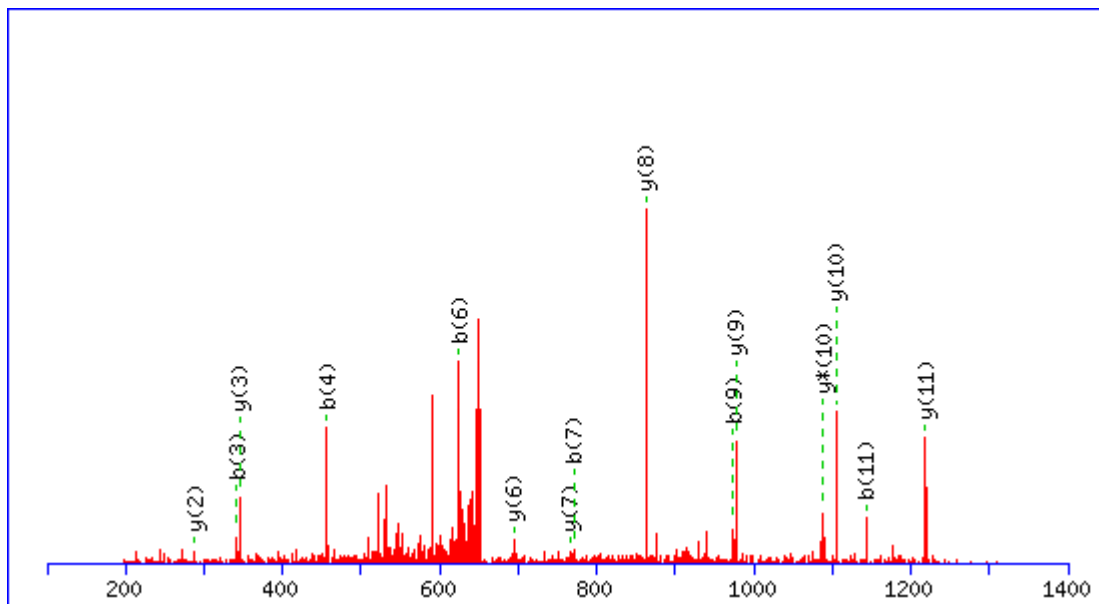

**Monoisotopic mass of neutral peptide Mr(calc):** 1316.672455

**Fixed modifications:** Carbamidomethyl (C)

**Variable modifications:**

**N-term :** Dimethyl (N-term)

**Ions Score:** 41 **Expect:** 0.031

**Matches (Bold Red):** 15/116 fragment ions using 42 most intense peaks

| #  | b           | b <sup>++</sup> | b <sup>*</sup> | b <sup>*++</sup> | b <sup>0</sup> | b <sup>0++</sup> | Seq. | y           | y <sup>++</sup> | y <sup>*</sup> | y <sup>*++</sup> | y <sup>0</sup> | y <sup>0++</sup> | #  |
|----|-------------|-----------------|----------------|------------------|----------------|------------------|------|-------------|-----------------|----------------|------------------|----------------|------------------|----|
| 1  | 100.075686  | 50.541481       |                |                  |                |                  | A    |             |                 |                |                  |                |                  | 12 |
| 2  | 213.159750  | 107.083513      |                |                  |                |                  | I    | 1218.611328 | 609.809302      | 1201.584779    | 601.296028       | 1200.600763    | 600.804019       | 11 |
| 3  | 341.218328  | 171.112802      | 324.191779     | 162.599527       |                |                  | Q    | 1105.527264 | 553.267270      | 1088.500715    | 544.753996       | 1087.516699    | 544.261988       | 10 |
| 4  | 456.245271  | 228.626273      | 439.218722     | 220.112999       | 438.234706     | 219.620991       | D    | 977.468686  | 489.237981      | 960.442137     | 480.724706       | 959.458121     | 480.232698       | 9  |
| 5  | 553.298035  | 277.152656      | 536.271486     | 268.639381       | 535.287470     | 268.147373       | P    | 862.441743  | 431.724509      | 845.415194     | 423.211235       | 844.431178     | 422.719227       | 8  |
| 6  | 624.335149  | 312.671213      | 607.308600     | 304.157938       | 606.324584     | 303.665930       | A    | 765.388979  | 383.198127      | 748.362430     | 374.684853       | 747.378414     | 374.192845       | 7  |
| 7  | 771.403563  | 386.205420      | 754.377014     | 377.692145       | 753.392998     | 377.200137       | F    | 694.351865  | 347.679571      | 677.325316     | 339.166296       | 676.341300     | 338.674288       | 6  |
| 8  | 858.435591  | 429.721433      | 841.409042     | 421.208159       | 840.425026     | 420.716151       | S    | 547.283451  | 274.145364      | 530.256902     | 265.632089       | 529.272886     | 265.140081       | 5  |
| 9  | 973.462534  | 487.234905      | 956.435985     | 478.721630       | 955.451969     | 478.229622       | D    | 460.251423  | 230.629349      | 443.224874     | 222.116075       | 442.240858     | 221.624067       | 4  |
| 10 | 1030.483998 | 515.745637      | 1013.457449    | 507.232362       | 1012.473433    | 506.740354       | G    | 345.224480  | 173.115878      | 328.197931     | 164.602603       |                |                  | 3  |
| 11 | 1143.568062 | 572.287669      | 1126.541513    | 563.774395       | 1125.557497    | 563.282387       | I    | 288.203016  | 144.605146      | 271.176467     | 136.091871       |                |                  | 2  |
| 12 |             |                 |                |                  |                |                  | R    | 175.118952  | 88.063114       | 158.092403     | 79.549839        |                |                  | 1  |

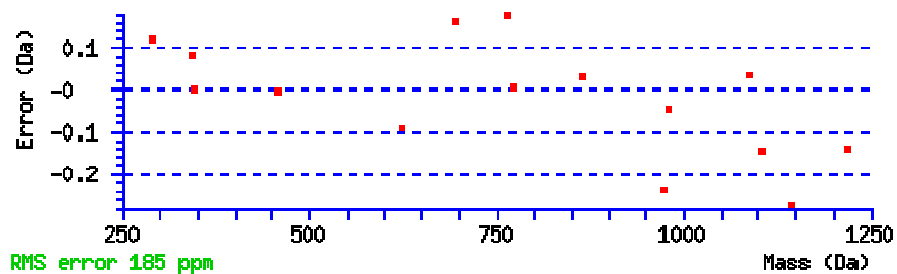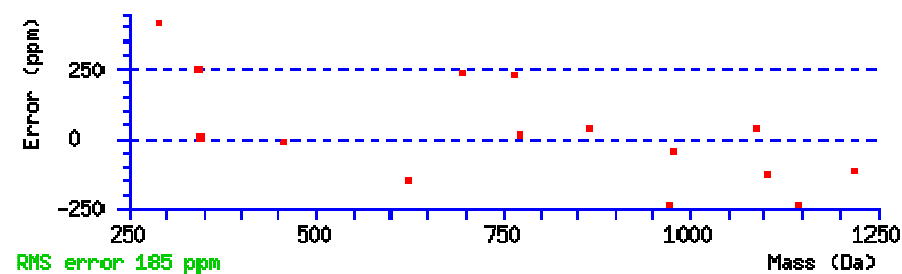

All matches to this query

| Score | Mr(calc):   | Delta    | Sequence                       |
|-------|-------------|----------|--------------------------------|
| 41.2  | 1316.672455 | 1.015113 | <a href="#">AIQDPAFSDGIR</a>   |
| 9.8   | 1316.694946 | 0.992622 | <a href="#">GTPGGGGPRPPSPR</a> |
| 9.8   | 1316.672440 | 1.015128 | <a href="#">VLRSDAAWEDK</a>    |
| 8.1   | 1315.677200 | 2.010368 | <a href="#">PLQDQNELFGK</a>    |
| 7.6   | 1315.680557 | 2.007011 | <a href="#">LDQKMQOPEK</a>     |
| 7.6   | 1315.688431 | 1.999137 | <a href="#">DNIPLAAGKFDR</a>   |
| 7.4   | 1316.693573 | 0.993995 | <a href="#">PSSPSSGKGKTEK</a>  |

|     |             |           |                              |
|-----|-------------|-----------|------------------------------|
| 6.9 | 1317.682281 | 0.005287  | <a href="#">NATAAMKNQVAR</a> |
| 6.9 | 1315.680573 | 2.006995  | <a href="#">LQAAVDGPMDKK</a> |
| 6.5 | 1317.696198 | -0.008630 | <a href="#">NADKVLELMNK</a>  |

---

MS/MS Fragmentation of **AIVAIENPADVSVISSR**

Found in **IPI00399036.1**, Tax\_Id=9606 Gene\_Symbol=hCG\_1984468 hypothetical protein LOC389672

Match to Query 6247: 1767.979438 from(884.996995,2+)

Title: Elution from: 40.89 to 44.76 period: FD070412dMavril07.raw experiment: 1 cycles: 1 precIntensity: 2955000.0 FinneganScanNumber: 3015

Data file D:\projecttemp\FD080412dM\FD070412dMavril07.msm

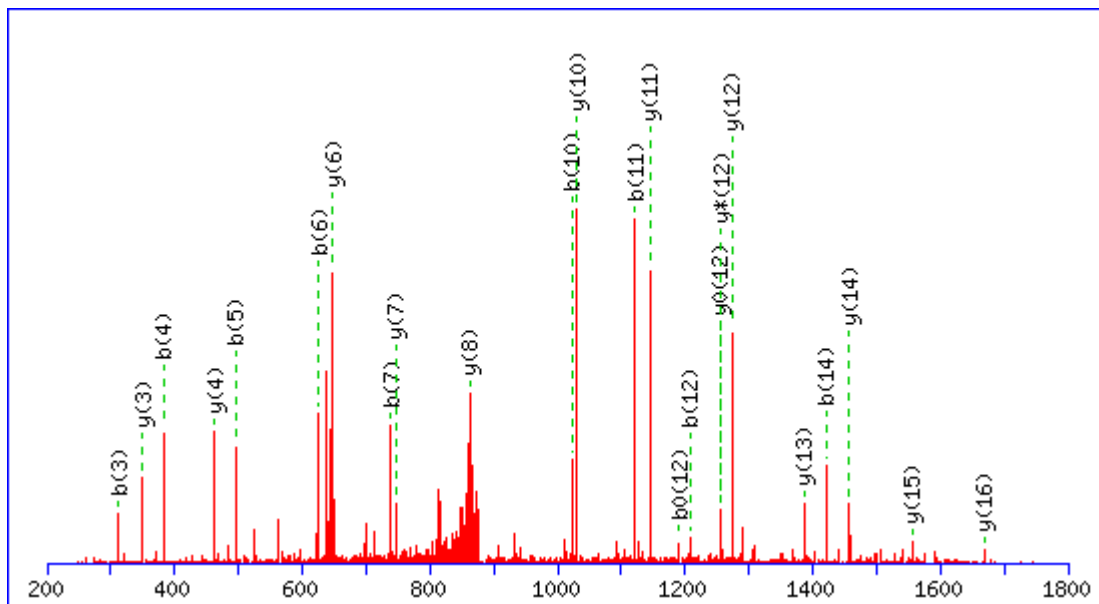

**Monoisotopic mass of neutral peptide Mr(calc):** 1767.973038

**Fixed modifications:** Carbamidomethyl (C)

**Variable modifications:**

**N-term :** Dimethyl (N-term)

**Ions Score:** 100 **Expect:** 3.1e-08

**Matches (Bold Red):** 24/168 fragment ions using 36 most intense peaks

| #  | b           | b <sup>++</sup> | b*          | b <sup>*++</sup> | b <sup>0</sup> | b <sup>0++</sup> | Seq. | y           | y <sup>++</sup> | y*          | y <sup>*++</sup> | y <sup>0</sup> | y <sup>0++</sup> | #  |
|----|-------------|-----------------|-------------|------------------|----------------|------------------|------|-------------|-----------------|-------------|------------------|----------------|------------------|----|
| 1  | 100.075686  | 50.541481       |             |                  |                |                  | A    |             |                 |             |                  |                |                  | 17 |
| 2  | 213.159750  | 107.083513      |             |                  |                |                  | I    | 1669.911925 | 835.459601      | 1652.885376 | 826.946326       | 1651.901360    | 826.454318       | 16 |
| 3  | 312.228164  | 156.617720      |             |                  |                |                  | V    | 1556.827861 | 778.917569      | 1539.801312 | 770.404294       | 1538.817296    | 769.912286       | 15 |
| 4  | 383.265278  | 192.136277      |             |                  |                |                  | A    | 1457.759447 | 729.383362      | 1440.732898 | 720.870087       | 1439.748882    | 720.378079       | 14 |
| 5  | 496.349342  | 248.678309      |             |                  |                |                  | I    | 1386.722333 | 693.864805      | 1369.695784 | 685.351530       | 1368.711768    | 684.859522       | 13 |
| 6  | 625.391935  | 313.199606      |             |                  | 607.381370     | 304.194323       | E    | 1273.638269 | 637.322773      | 1256.611720 | 628.809498       | 1255.627704    | 628.317490       | 12 |
| 7  | 739.434862  | 370.221069      | 722.408313  | 361.707795       | 721.424297     | 361.215787       | N    | 1144.595676 | 572.801476      | 1127.569127 | 564.288202       | 1126.585111    | 563.796194       | 11 |
| 8  | 836.487626  | 418.747451      | 819.461077  | 410.234177       | 818.477061     | 409.742169       | P    | 1030.552749 | 515.780013      | 1013.526200 | 507.266738       | 1012.542184    | 506.774730       | 10 |
| 9  | 907.524740  | 454.266008      | 890.498191  | 445.752734       | 889.514175     | 445.260726       | A    | 933.499985  | 467.253631      | 916.473436  | 458.740356       | 915.489420     | 458.248348       | 9  |
| 10 | 1022.551683 | 511.779480      | 1005.525134 | 503.266205       | 1004.541118    | 502.774197       | D    | 862.462871  | 431.735074      | 845.436322  | 423.221799       | 844.452306     | 422.729791       | 8  |
| 11 | 1121.620097 | 561.313687      | 1104.593548 | 552.800412       | 1103.609532    | 552.308404       | V    | 747.435928  | 374.221602      | 730.409379  | 365.708328       | 729.425363     | 365.216320       | 7  |
| 12 | 1208.652125 | 604.829701      | 1191.625576 | 596.316426       | 1190.641560    | 595.824418       | S    | 648.367514  | 324.687395      | 631.340965  | 316.174121       | 630.356949     | 315.682113       | 6  |
| 13 | 1307.720539 | 654.363908      | 1290.693990 | 645.850633       | 1289.709974    | 645.358625       | V    | 561.335486  | 281.171381      | 544.308937  | 272.658107       | 543.324921     | 272.166099       | 5  |
| 14 | 1420.804603 | 710.905940      | 1403.778054 | 702.392665       | 1402.794038    | 701.900657       | I    | 462.267072  | 231.637174      | 445.240523  | 223.123899       | 444.256507     | 222.631891       | 4  |
| 15 | 1507.836631 | 754.421954      | 1490.810082 | 745.908679       | 1489.826066    | 745.416671       | S    | 349.183008  | 175.095142      | 332.156459  | 166.581868       | 331.172443     | 166.089860       | 3  |
| 16 | 1594.868659 | 797.937968      | 1577.842110 | 789.424693       | 1576.858094    | 788.932685       | S    | 262.150980  | 131.579128      | 245.124431  | 123.065854       | 244.140415     | 122.573846       | 2  |
| 17 |             |                 |             |                  |                |                  | R    | 175.118952  | 88.063114       | 158.092403  | 79.549839        |                |                  | 1  |

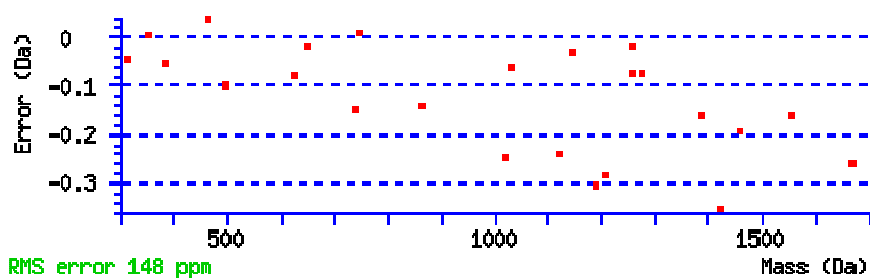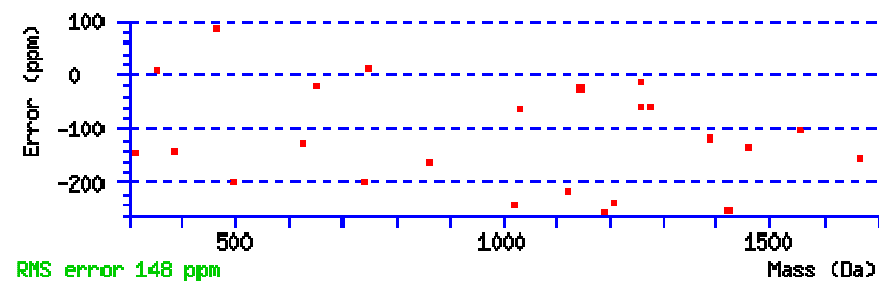

All matches to this query

| Score | Mr(calc):   | Delta    | Sequence                          |
|-------|-------------|----------|-----------------------------------|
| 100.2 | 1767.973038 | 0.006400 | <a href="#">AIVAIENPADVSVISSR</a> |
| 18.6  | 1767.961792 | 0.017646 | <a href="#">EPQLKPQEITDLSSK</a>   |

|     |             |          |                                  |
|-----|-------------|----------|----------------------------------|
| 9.2 | 1767.963104 | 0.016334 | <a href="#">ALEYIENLRQQAHK</a>   |
| 7.7 | 1767.963165 | 0.016273 | <a href="#">FTRKSVVASQSFOAGK</a> |
| 7.1 | 1766.989914 | 0.989524 | <a href="#">RCAVGPPALVVKMTPK</a> |
| 5.2 | 1767.973007 | 0.006431 | <a href="#">KILNKIESGELDPER</a>  |
| 4.9 | 1767.973007 | 0.006431 | <a href="#">KILNKIESGELDPER</a>  |
| 3.0 | 1767.961792 | 0.017646 | <a href="#">EPQLKPQEITDLSSK</a>  |
| 2.5 | 1765.964767 | 2.014671 | <a href="#">SFSEMLQNLDKKVK</a>   |
| 2.0 | 1766.965225 | 1.014213 | <a href="#">SSHLTTHKRIHTGHK</a>  |

MS/MS Fragmentation of **ALVDGPCTQVR**

Found in **IPI00002821.4**, Tax\_Id=9606 Gene\_Symbol=RPL14 60S ribosomal protein L14

Match to Query 4218: 1242.639192 from(622.326872,2+)

Title: Elution from: 24.73 to 28.55 period: FD070412dMavril07.raw experiment: 1 cycles: 1 precIntensity: 973270.3 FinneganScanNumber: 1689

Data file D:\projecttemp\FD080412dM\FD070412dMavril07.msm

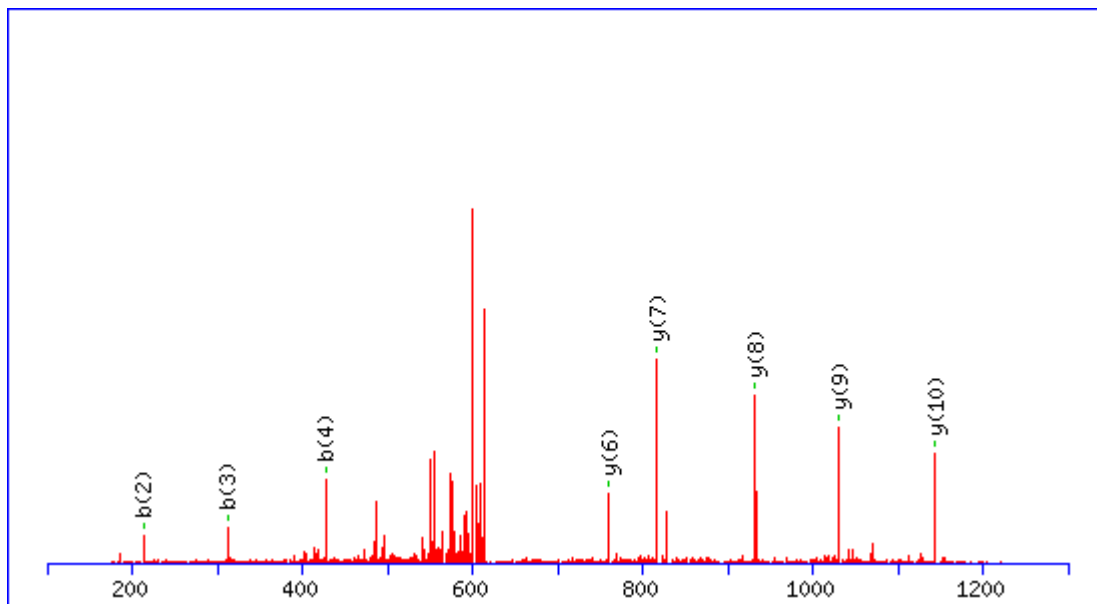

**Monoisotopic mass of neutral peptide Mr(calc):** 1242.639069

**Fixed modifications:** Carbamidomethyl (C)

**Variable modifications:**

**N-term :** Dimethyl (N-term)

**Ions Score:** 38 **Expect:** 0.045

**Matches (Bold Red):** 8/92 fragment ions using 25 most intense peaks

| #  | b                 | b <sup>++</sup> | b*          | b <sup>*++</sup> | b <sup>0</sup> | b <sup>0++</sup> | Seq. | y                  | y <sup>++</sup> | y*          | y <sup>*++</sup> | y <sup>0</sup> | y <sup>0++</sup> | #  |
|----|-------------------|-----------------|-------------|------------------|----------------|------------------|------|--------------------|-----------------|-------------|------------------|----------------|------------------|----|
| 1  | 100.075686        | 50.541481       |             |                  |                |                  | A    |                    |                 |             |                  |                |                  | 11 |
| 2  | <b>213.159750</b> | 107.083513      |             |                  |                |                  | L    | <b>1144.577921</b> | 572.792599      | 1127.551372 | 564.279324       | 1126.567356    | 563.787316       | 10 |
| 3  | <b>312.228164</b> | 156.617720      |             |                  |                |                  | V    | <b>1031.493857</b> | 516.250567      | 1014.467308 | 507.737292       | 1013.483292    | 507.245284       | 9  |
| 4  | <b>427.255107</b> | 214.131191      |             |                  | 409.244542     | 205.125909       | D    | <b>932.425443</b>  | 466.716360      | 915.398894  | 458.203085       | 914.414878     | 457.711077       | 8  |
| 5  | 484.276571        | 242.641923      |             |                  | 466.266006     | 233.636641       | G    | <b>817.398500</b>  | 409.202888      | 800.371951  | 400.689614       | 799.387935     | 400.197606       | 7  |
| 6  | 581.329335        | 291.168306      |             |                  | 563.318770     | 282.163023       | P    | <b>760.377036</b>  | 380.692156      | 743.350487  | 372.178882       | 742.366471     | 371.686874       | 6  |
| 7  | 741.359984        | 371.183630      |             |                  | 723.349419     | 362.178348       | C    | 663.324272         | 332.165774      | 646.297723  | 323.652500       | 645.313707     | 323.160492       | 5  |
| 8  | 842.407663        | 421.707470      |             |                  | 824.397098     | 412.702187       | T    | 503.293623         | 252.150449      | 486.267074  | 243.637175       | 485.283058     | 243.145167       | 4  |
| 9  | 970.466241        | 485.736759      | 953.439692  | 477.223484       | 952.455676     | 476.731476       | Q    | 402.245944         | 201.626610      | 385.219395  | 193.113335       |                |                  | 3  |
| 10 | 1069.534655       | 535.270966      | 1052.508106 | 526.757691       | 1051.524090    | 526.265683       | V    | 274.187366         | 137.597321      | 257.160817  | 129.084046       |                |                  | 2  |
| 11 |                   |                 |             |                  |                |                  | R    | 175.118952         | 88.063114       | 158.092403  | 79.549839        |                |                  | 1  |

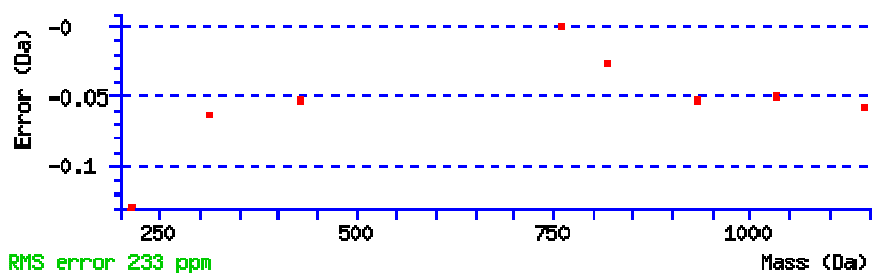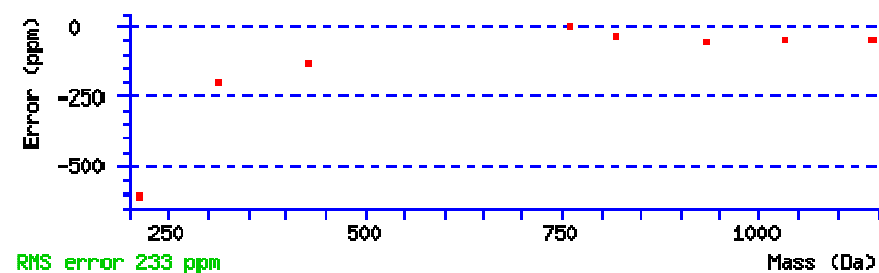

All matches to this query

| Score | Mr(calc):   | Delta     | Sequence                    |
|-------|-------------|-----------|-----------------------------|
| 37.8  | 1242.639069 | 0.000123  | <a href="#">ALVDGPCTQVR</a> |
| 11.5  | 1242.650253 | -0.011061 | <a href="#">RMDAPASAAVR</a> |
| 7.5   | 1242.643066 | -0.003874 | <a href="#">DPLTQMPKWK</a>  |
| 5.1   | 1242.647766 | -0.008574 | <a href="#">WRLMLMGHR</a>   |
| 4.9   | 1242.639023 | 0.000169  | <a href="#">SPSMESKLHR</a>  |
| 4.6   | 1240.637299 | 2.001893  | <a href="#">MEILNTYLTK</a>  |
| 4.3   | 1240.627426 | 2.011766  | <a href="#">PSKKDGFCK</a>   |
| 4.2   | 1241.636581 | 1.002611  | <a href="#">VCFELYDLK</a>   |



|     |             |          |                             |
|-----|-------------|----------|-----------------------------|
| 4.1 | 1242.627777 | 0.011415 | <a href="#">MEEAKTELHK</a>  |
| 3.4 | 1242.639069 | 0.000123 | <a href="#">VDPGCSTVPRK</a> |

MS/MS Fragmentation of **AQAELVGTADEATR**

Found in **IPI00024920.1**, Tax\_Id=9606 Gene\_Symbol=ATP5D ATP synthase subunit delta, mitochondrial

Match to Query 5000: 1458.742174 from(730.378363,2+)

Title: Elution from: 24.37 to 28.34 period: FD070412dMavril06.raw experiment: 1 cycles: 1 precIntensity: 407014.8 FinneganScanNumber: 1508

Data file D:\projecttemp\FD080412dM\FD070412dMavril06.msm

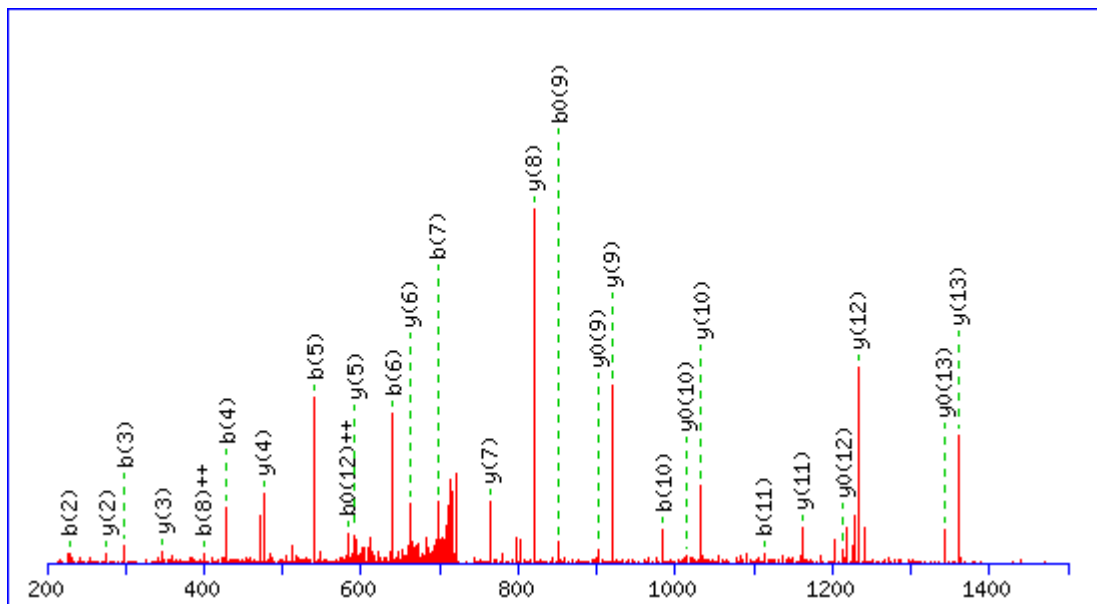

**Monoisotopic mass of neutral peptide Mr(calc):** 1458.731415

**Fixed modifications:** Carbamidomethyl (C)

**Variable modifications:**

**N-term :** Dimethyl (N-term)

**Ions Score:** 85 **Expect:** 1e-06

**Matches (Bold Red):** 27/146 fragment ions using 55 most intense peaks

| #  | b                  | b <sup>++</sup>   | b*          | b <sup>*++</sup> | b <sup>0</sup>    | b <sup>0++</sup>  | Seq. | y                  | y <sup>++</sup> | y*          | y <sup>*++</sup> | y <sup>0</sup>     | y <sup>0++</sup> | #  |
|----|--------------------|-------------------|-------------|------------------|-------------------|-------------------|------|--------------------|-----------------|-------------|------------------|--------------------|------------------|----|
| 1  | 100.075686         | 50.541481         |             |                  |                   |                   | A    |                    |                 |             |                  |                    |                  | 14 |
| 2  | <b>228.134264</b>  | 114.570770        | 211.107715  | 106.057496       |                   |                   | Q    | <b>1360.670301</b> | 680.838789      | 1343.643752 | 672.325514       | <b>1342.659736</b> | 671.833506       | 13 |
| 3  | <b>299.171378</b>  | 150.089327        | 282.144829  | 141.576053       |                   |                   | A    | <b>1232.611723</b> | 616.809500      | 1215.585174 | 608.296225       | <b>1214.601158</b> | 607.804217       | 12 |
| 4  | <b>428.213971</b>  | 214.610624        | 411.187422  | 206.097349       | 410.203406        | 205.605341        | E    | <b>1161.574609</b> | 581.290943      | 1144.548060 | 572.777668       | 1143.564044        | 572.285660       | 11 |
| 5  | <b>541.298035</b>  | 271.152656        | 524.271486  | 262.639381       | 523.287470        | 262.147373        | L    | <b>1032.532016</b> | 516.769646      | 1015.505467 | 508.256372       | <b>1014.521451</b> | 507.764364       | 10 |
| 6  | <b>640.366449</b>  | 320.686863        | 623.339900  | 312.173588       | 622.355884        | 311.681580        | V    | <b>919.447952</b>  | 460.227614      | 902.421403  | 451.714340       | <b>901.437387</b>  | 451.222332       | 9  |
| 7  | <b>697.387913</b>  | 349.197595        | 680.361364  | 340.684320       | 679.377348        | 340.192312        | G    | <b>820.379538</b>  | 410.693407      | 803.352989  | 402.180133       | 802.368973         | 401.688125       | 8  |
| 8  | 798.435592         | <b>399.721434</b> | 781.409043  | 391.208160       | 780.425027        | 390.716152        | T    | <b>763.358074</b>  | 382.182675      | 746.331525  | 373.669401       | 745.347509         | 373.177393       | 7  |
| 9  | 869.472706         | 435.239991        | 852.446157  | 426.726717       | <b>851.462141</b> | 426.234709        | A    | <b>662.310395</b>  | 331.658836      | 645.283846  | 323.145561       | 644.299830         | 322.653553       | 6  |
| 10 | <b>984.499649</b>  | 492.753463        | 967.473100  | 484.240188       | 966.489084        | 483.748180        | D    | <b>591.273281</b>  | 296.140279      | 574.246732  | 287.627004       | 573.262716         | 287.134996       | 5  |
| 11 | <b>1113.542242</b> | 557.274759        | 1096.515693 | 548.761485       | 1095.531677       | 548.269477        | E    | <b>476.246338</b>  | 238.626807      | 459.219789  | 230.113533       | 458.235773         | 229.621525       | 4  |
| 12 | 1184.579356        | 592.793316        | 1167.552807 | 584.280042       | 1166.568791       | <b>583.788034</b> | A    | <b>347.203745</b>  | 174.105510      | 330.177196  | 165.592236       | 329.193180         | 165.100228       | 3  |
| 13 | 1285.627035        | 643.317156        | 1268.600486 | 634.803881       | 1267.616470       | 634.311873        | T    | <b>276.166631</b>  | 138.586953      | 259.140082  | 130.073679       | 258.156066         | 129.581671       | 2  |
| 14 |                    |                   |             |                  |                   |                   | R    | 175.118952         | 88.063114       | 158.092403  | 79.549839        |                    |                  | 1  |

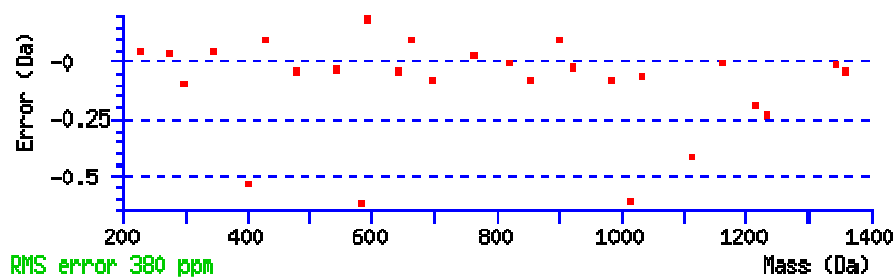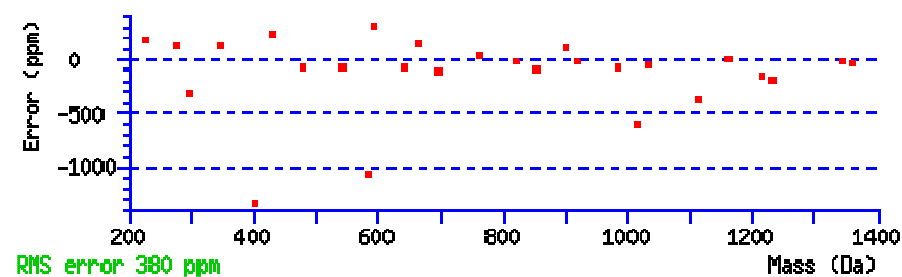

All matches to this query

| Score | Mr(calc):   | Delta     | Sequence                       |
|-------|-------------|-----------|--------------------------------|
| 85.0  | 1458.731415 | 0.010759  | <a href="#">AQAELVGTADEATR</a> |
| 11.9  | 1458.738831 | 0.003343  | <a href="#">QAVXEVCIDIDVAK</a> |
| 11.9  | 1458.738831 | 0.003343  | <a href="#">QAVXEVCIDIDVAK</a> |
| 9.9   | 1458.750046 | -0.007872 | <a href="#">MKGNTNSAVTPAPK</a> |
| 7.3   | 1458.750031 | -0.007857 | <a href="#">SKPDIKMEPSAGR</a>  |

|     |             |           |                                 |
|-----|-------------|-----------|---------------------------------|
| 6.3 | 1458.746704 | -0.004530 | <a href="#">KPWTAVDTSVDGR</a>   |
| 6.0 | 1457.726273 | 1.015901  | <a href="#">LLASSPAGEAGSWGR</a> |
| 5.9 | 1458.746704 | -0.004530 | <a href="#">KPWTAVDTSVDGR</a>   |
| 3.6 | 1458.728928 | 0.013246  | <a href="#">AAWAIGCGNDLGVK</a>  |
| 3.4 | 1457.747375 | 0.994799  | <a href="#">KVARAEEAGGEEGK</a>  |

MS/MS Fragmentation of **ASATSVSSAGEQAAGDPEGR**

Found in **IPI00171176.3**, Tax\_Id=9606 Gene\_Symbol=PANK2 Isoform 1 of Pantothenate kinase 2, mitochondrial

Match to Query 6325: 1874.872346 from(938.443449,2+)

Title: Elution from: 21.31 to 25.23 period: FD070412dMavril05.raw experiment: 1 cycles: 1 precIntensity: 102569.8 FinneganScanNumber: 1276

Data file D:\projectemp\FD080412dM\FD070412dMavril05.msm

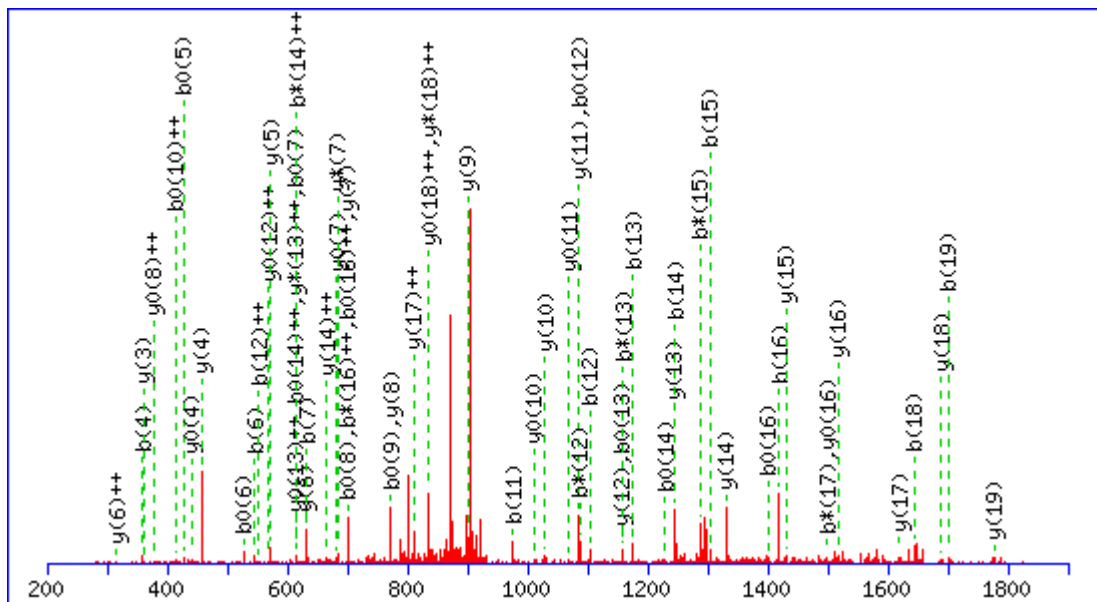

**Monoisotopic mass of neutral peptide Mr(calc):** 1874.860596

**Fixed modifications:** Carbamidomethyl (C)

**Variable modifications:**

**N-term :** Dimethyl (N-term)

**Ions Score:** 72 **Expect:** 1.1e-05

**Matches (Bold Red):** 62/200 fragment ions using 159 most intense peaks

| #  | b           | b <sup>++</sup> | b <sup>*</sup> | b <sup>*++</sup> | b <sup>0</sup> | b <sup>0++</sup> | Seq. | y           | y <sup>++</sup> | y <sup>*</sup> | y <sup>*++</sup> | y <sup>0</sup> | y <sup>0++</sup> | #  |
|----|-------------|-----------------|----------------|------------------|----------------|------------------|------|-------------|-----------------|----------------|------------------|----------------|------------------|----|
| 1  | 100.075686  | 50.541481       |                |                  |                |                  | A    |             |                 |                |                  |                |                  | 20 |
| 2  | 187.107714  | 94.057495       |                |                  | 169.097149     | 85.052212        | S    | 1776.799476 | 888.903376      | 1759.772927    | 880.390101       | 1758.788911    | 879.898093       | 19 |
| 3  | 258.144828  | 129.576052      |                |                  | 240.134263     | 120.570769       | A    | 1689.767448 | 845.387362      | 1672.740899    | 836.874087       | 1671.756883    | 836.382079       | 18 |
| 4  | 359.192507  | 180.099891      |                |                  | 341.181942     | 171.094609       | T    | 1618.730334 | 809.868805      | 1601.703785    | 801.355530       | 1600.719769    | 800.863522       | 17 |
| 5  | 446.224535  | 223.615905      |                |                  | 428.213970     | 214.610623       | S    | 1517.682655 | 759.344965      | 1500.656106    | 750.831691       | 1499.672090    | 750.339683       | 16 |
| 6  | 545.292949  | 273.150113      |                |                  | 527.282384     | 264.144830       | V    | 1430.650627 | 715.828951      | 1413.624078    | 707.315677       | 1412.640062    | 706.823669       | 15 |
| 7  | 632.324977  | 316.666127      |                |                  | 614.314412     | 307.660844       | S    | 1331.582213 | 666.294744      | 1314.555664    | 657.781470       | 1313.571648    | 657.289462       | 14 |
| 8  | 719.357005  | 360.182141      |                |                  | 701.346440     | 351.176858       | S    | 1244.550185 | 622.778730      | 1227.523636    | 614.265456       | 1226.539620    | 613.773448       | 13 |
| 9  | 790.394119  | 395.700697      |                |                  | 772.383554     | 386.695415       | A    | 1157.518157 | 579.262716      | 1140.491608    | 570.749442       | 1139.507592    | 570.257434       | 12 |
| 10 | 847.415583  | 424.211430      |                |                  | 829.405018     | 415.206147       | G    | 1086.481043 | 543.744159      | 1069.454494    | 535.230885       | 1068.470478    | 534.738877       | 11 |
| 11 | 976.458176  | 488.732726      |                |                  | 958.447611     | 479.727443       | E    | 1029.459579 | 515.233427      | 1012.433030    | 506.720153       | 1011.449014    | 506.228145       | 10 |
| 12 | 1104.516754 | 552.762015      | 1087.490205    | 544.248741       | 1086.506189    | 543.756732       | Q    | 900.416986  | 450.712131      | 883.390437     | 442.198856       | 882.406421     | 441.706848       | 9  |
| 13 | 1175.553868 | 588.280572      | 1158.527319    | 579.767298       | 1157.543303    | 579.275289       | A    | 772.358408  | 386.682842      | 755.331859     | 378.169567       | 754.347843     | 377.677559       | 8  |
| 14 | 1246.590982 | 623.799129      | 1229.564433    | 615.285855       | 1228.580417    | 614.793846       | A    | 701.321294  | 351.164285      | 684.294745     | 342.651010       | 683.310729     | 342.159002       | 7  |
| 15 | 1303.612446 | 652.309861      | 1286.585897    | 643.796586       | 1285.601881    | 643.304578       | G    | 630.284180  | 315.645728      | 613.257631     | 307.132453       | 612.273615     | 306.640445       | 6  |
| 16 | 1418.639389 | 709.823332      | 1401.612840    | 701.310058       | 1400.628824    | 700.818050       | D    | 573.262716  | 287.134996      | 556.236167     | 278.621721       | 555.252151     | 278.129713       | 5  |
| 17 | 1515.692153 | 758.349715      | 1498.665604    | 749.836440       | 1497.681588    | 749.344432       | P    | 458.235773  | 229.621524      | 441.209224     | 221.108250       | 440.225208     | 220.616242       | 4  |
| 18 | 1644.734746 | 822.871011      | 1627.708197    | 814.357736       | 1626.724181    | 813.865728       | E    | 361.183009  | 181.095142      | 344.156460     | 172.581868       | 343.172444     | 172.089860       | 3  |
| 19 | 1701.756210 | 851.381743      | 1684.729661    | 842.868468       | 1683.745645    | 842.376460       | G    | 232.140416  | 116.573846      | 215.113867     | 108.060571       |                |                  | 2  |
| 20 |             |                 |                |                  |                |                  | R    | 175.118952  | 88.063114       | 158.092403     | 79.549839        |                |                  | 1  |

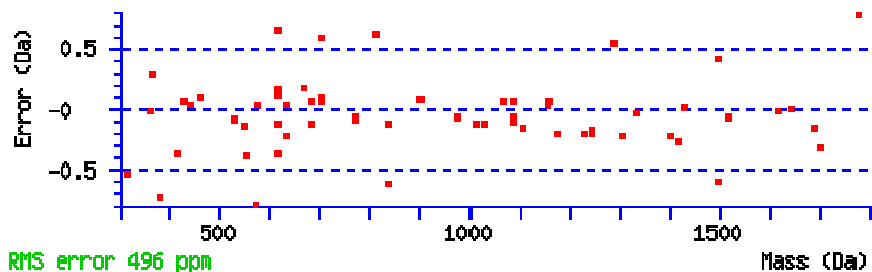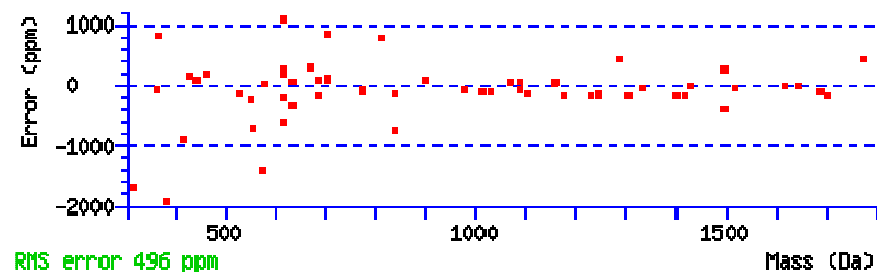

All matches to this query

| Score | Mr(calc):   | Delta    | Sequence                             |
|-------|-------------|----------|--------------------------------------|
| 72.0  | 1874.860596 | 0.011750 | <a href="#">ASATSVSSAGEQAAGDPEGR</a> |
| 5.5   | 1874.867996 | 0.004350 | <a href="#">XEDGQVNISIGEMVPSR</a>    |
| 3.3   | 1873.869385 | 1.002961 | <a href="#">ADHSFSDGVPSDSVEAAK</a>   |
| 1.4   | 1872.881363 | 1.990983 | <a href="#">VQDLSAGGQGSILTDSGPER</a> |

|     |             |          |                                   |
|-----|-------------|----------|-----------------------------------|
| 0.8 | 1873.883987 | 0.988359 | <a href="#">XEDGQVNISIGEMVPSR</a> |
|-----|-------------|----------|-----------------------------------|

---

MS/MS Fragmentation of **AVENSSTAIGIR**

Found in **IPI00171199.5**, Tax\_Id=9606 Gene\_Symbol=PSMA3 Isoform 2 of Proteasome subunit alpha type-3

Match to Query 4220: 1244.672278 from(623.343415,2+)

Title: Elution from: 23.99 to 27.88 period: FD070412dMavril07.raw experiment: 1 cycles: 1 precIntensity: 3532137.7 FinneganScanNumber: 1631

Data file D:\projecttemp\FD080412dM\FD070412dMavril07.msm

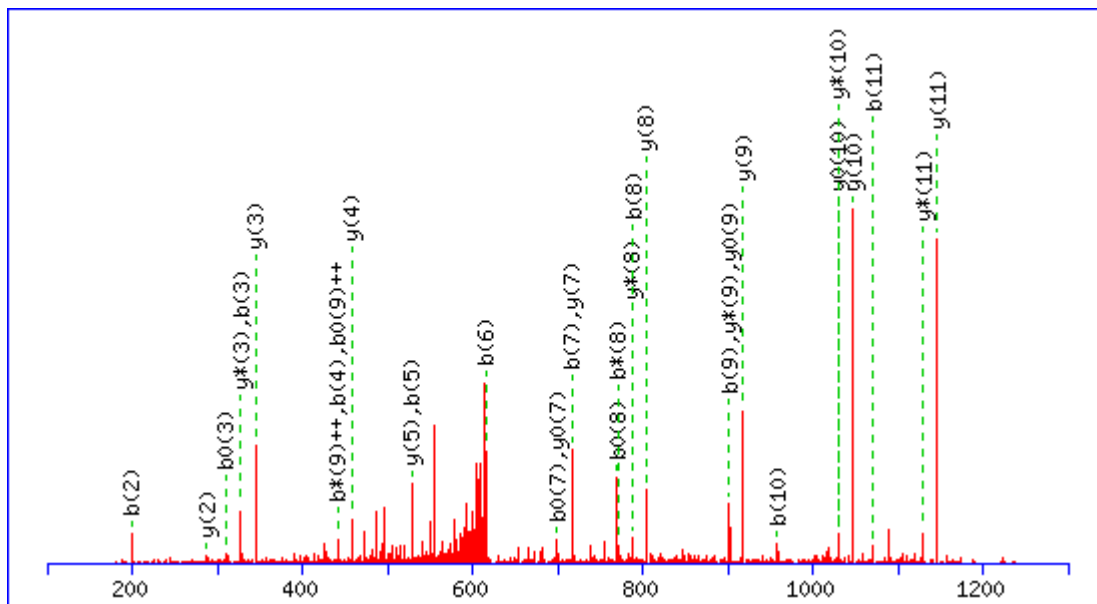

**Monoisotopic mass of neutral peptide Mr(calc):** 1244.672440

**Fixed modifications:** Carbamidomethyl (C)

**Variable modifications:**

**N-term :** Dimethyl (N-term)

**Ions Score:** 68 **Expect:** 7.2e-05

**Matches (Bold Red):** 33/112 fragment ions using 50 most intense peaks



| #  | b                  | b <sup>++</sup> | b <sup>*</sup>    | b <sup>*++</sup>  | b <sup>0</sup>    | b <sup>0++</sup>  | Seq. | y                  | y <sup>++</sup> | y <sup>*</sup>     | y <sup>*++</sup> | y <sup>0</sup>     | y <sup>0++</sup> | #  |
|----|--------------------|-----------------|-------------------|-------------------|-------------------|-------------------|------|--------------------|-----------------|--------------------|------------------|--------------------|------------------|----|
| 1  | 100.075686         | 50.541481       |                   |                   |                   |                   | A    |                    |                 |                    |                  |                    |                  | 12 |
| 2  | <b>199.144100</b>  | 100.075688      |                   |                   |                   |                   | V    | <b>1146.611327</b> | 573.809302      | <b>1129.584778</b> | 565.296027       | 1128.600762        | 564.804019       | 11 |
| 3  | <b>328.186693</b>  | 164.596984      |                   |                   | <b>310.176128</b> | 155.591702        | E    | <b>1047.542913</b> | 524.275095      | <b>1030.516364</b> | 515.761820       | <b>1029.532348</b> | 515.269812       | 10 |
| 4  | <b>442.229620</b>  | 221.618448      | 425.203071        | 213.105174        | 424.219055        | 212.613166        | N    | <b>918.500320</b>  | 459.753798      | <b>901.473771</b>  | 451.240524       | <b>900.489755</b>  | 450.748516       | 9  |
| 5  | <b>529.261648</b>  | 265.134462      | 512.235099        | 256.621188        | 511.251083        | 256.129180        | S    | <b>804.457393</b>  | 402.732335      | <b>787.430844</b>  | 394.219060       | 786.446828         | 393.727052       | 8  |
| 6  | <b>616.293676</b>  | 308.650476      | 599.267127        | 300.137202        | 598.283111        | 299.645194        | S    | <b>717.425365</b>  | 359.216321      | 700.398816         | 350.703046       | <b>699.414800</b>  | 350.211038       | 7  |
| 7  | <b>717.341355</b>  | 359.174316      | 700.314806        | 350.661041        | <b>699.330790</b> | 350.169033        | T    | 630.393337         | 315.700307      | 613.366788         | 307.187032       | 612.382772         | 306.695024       | 6  |
| 8  | <b>788.378469</b>  | 394.692873      | <b>771.351920</b> | 386.179598        | <b>770.367904</b> | 385.687590        | A    | <b>529.345658</b>  | 265.176467      | 512.319109         | 256.663193       |                    |                  | 5  |
| 9  | <b>901.462533</b>  | 451.234905      | 884.435984        | <b>442.721630</b> | 883.451968        | <b>442.229622</b> | I    | <b>458.308544</b>  | 229.657910      | 441.281995         | 221.144635       |                    |                  | 4  |
| 10 | <b>958.483997</b>  | 479.745637      | 941.457448        | 471.232362        | 940.473432        | 470.740354        | G    | <b>345.224480</b>  | 173.115878      | <b>328.197931</b>  | 164.602603       |                    |                  | 3  |
| 11 | <b>1071.568061</b> | 536.287669      | 1054.541512       | 527.774394        | 1053.557496       | 527.282386        | I    | <b>288.203016</b>  | 144.605146      | 271.176467         | 136.091871       |                    |                  | 2  |
| 12 |                    |                 |                   |                   |                   |                   | R    | 175.118952         | 88.063114       | 158.092403         | 79.549839        |                    |                  | 1  |

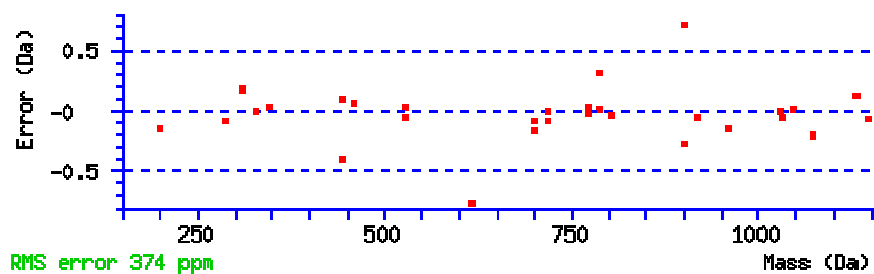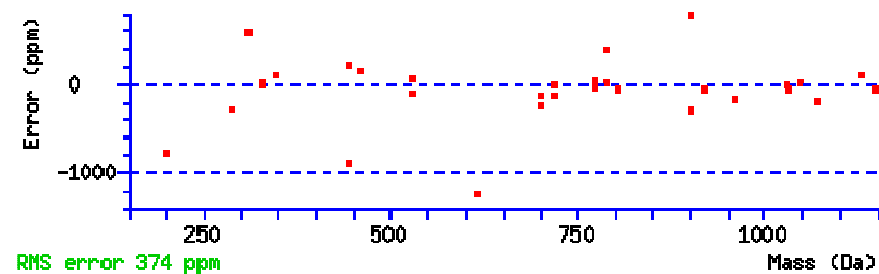

All matches to this query

| Score | Mr(calc):   | Delta     | Sequence                     |
|-------|-------------|-----------|------------------------------|
| 67.7  | 1244.672440 | -0.000162 | <a href="#">AVENSSTAIGIR</a> |
| 20.9  | 1244.672470 | -0.000192 | <a href="#">VVEATNSVTAVR</a> |
| 17.8  | 1242.660812 | 2.011466  | <a href="#">PVENDISKWK</a>   |
| 17.8  | 1242.660812 | 2.011466  | <a href="#">PVENDISKWK</a>   |
| 13.2  | 1244.672440 | -0.000162 | <a href="#">KDSALGLGIR</a>   |
| 12.9  | 1244.665909 | 0.006369  | <a href="#">VAEATRMLNGR</a>  |
| 9.6   | 1244.661224 | 0.011054  | <a href="#">VVSQDEIVSAAK</a> |

|     |             |           |                              |
|-----|-------------|-----------|------------------------------|
| 8.5 | 1244.672470 | -0.000192 | <a href="#">VVSELLQGGTSR</a> |
| 7.7 | 1244.673767 | -0.001489 | <a href="#">AWRSNXSRQK</a>   |
| 6.8 | 1243.681213 | 0.991065  | <a href="#">WLEEVSQVAK</a>   |

MS/MS Fragmentation of **AVTELNEPLSNEDR**

Found in **IPI00216319.3**, Tax\_Id=9606 Gene\_Symbol=YWHAH 14-3-3 protein eta

Match to Query 5247: 1613.792108 from(807.903330,2+)

Title: Elution from: 28.92 to 32.85 period: FD070412dMavril07.raw experiment: 1 cycles: 1 precIntensity: 933657.8 FinneganScanNumber: 2037

Data file D:\projecttemp\FD080412dM\FD070412dMavril07.msm

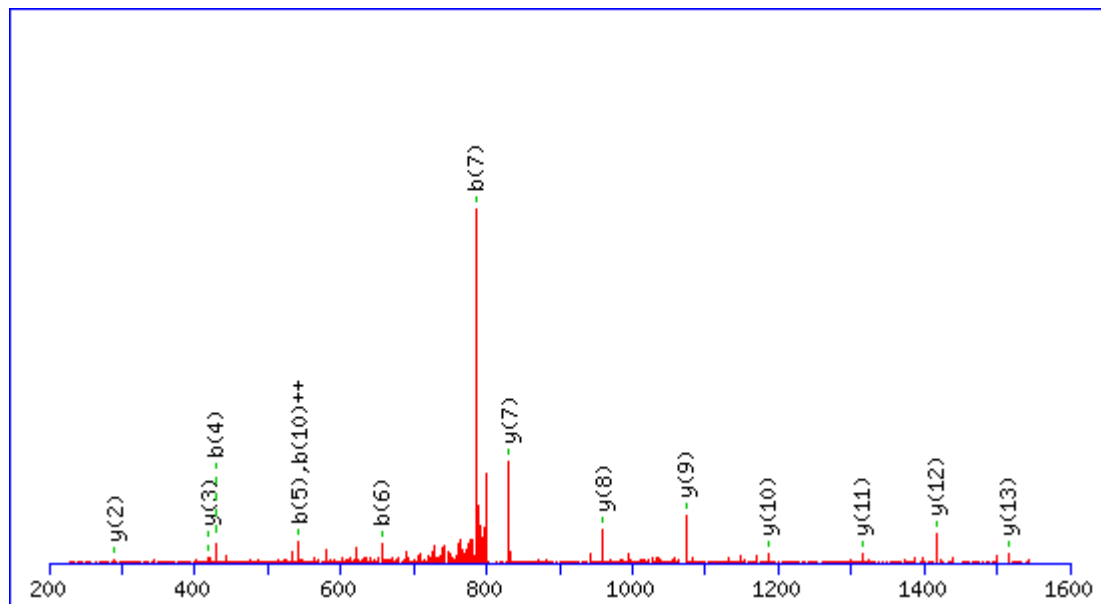

**Monoisotopic mass of neutral peptide Mr(calc):** 1613.789642

**Fixed modifications:** Carbamidomethyl (C)

**Variable modifications:**

**N-term :** Dimethyl (N-term)

**Ions Score:** 88 **Expect:** 4.6e-07

**Matches (Bold Red):** 14/140 fragment ions using 18 most intense peaks

| #  | b           | b <sup>++</sup> | b*          | b <sup>*++</sup> | b <sup>0</sup> | b <sup>0++</sup> | Seq. | y           | y <sup>++</sup> | y*          | y <sup>*++</sup> | y <sup>0</sup> | y <sup>0++</sup> | #  |
|----|-------------|-----------------|-------------|------------------|----------------|------------------|------|-------------|-----------------|-------------|------------------|----------------|------------------|----|
| 1  | 100.075686  | 50.541481       |             |                  |                |                  | A    |             |                 |             |                  |                |                  | 14 |
| 2  | 199.144100  | 100.075688      |             |                  |                |                  | V    | 1515.728541 | 758.367909      | 1498.701992 | 749.854634       | 1497.717976    | 749.362626       | 13 |
| 3  | 300.191779  | 150.599527      |             |                  | 282.181214     | 141.594245       | T    | 1416.660127 | 708.833702      | 1399.633578 | 700.320427       | 1398.649562    | 699.828419       | 12 |
| 4  | 429.234372  | 215.120824      |             |                  | 411.223807     | 206.115542       | E    | 1315.612448 | 658.309862      | 1298.585899 | 649.796588       | 1297.601883    | 649.304580       | 11 |
| 5  | 542.318436  | 271.662856      |             |                  | 524.307871     | 262.657574       | L    | 1186.569855 | 593.788566      | 1169.543306 | 585.275291       | 1168.559290    | 584.783283       | 10 |
| 6  | 656.361363  | 328.684320      | 639.334814  | 320.171045       | 638.350798     | 319.679037       | N    | 1073.485791 | 537.246534      | 1056.459242 | 528.733259       | 1055.475226    | 528.241251       | 9  |
| 7  | 785.403956  | 393.205616      | 768.377407  | 384.692341       | 767.393391     | 384.200333       | E    | 959.442864  | 480.225070      | 942.416315  | 471.711796       | 941.432299     | 471.219788       | 8  |
| 8  | 882.456720  | 441.731998      | 865.430171  | 433.218724       | 864.446155     | 432.726716       | P    | 830.400271  | 415.703774      | 813.373722  | 407.190499       | 812.389706     | 406.698491       | 7  |
| 9  | 995.540784  | 498.274030      | 978.514235  | 489.760756       | 977.530219     | 489.268748       | L    | 733.347507  | 367.177392      | 716.320958  | 358.664117       | 715.336942     | 358.172109       | 6  |
| 10 | 1082.572812 | 541.790044      | 1065.546263 | 533.276770       | 1064.562247    | 532.784762       | S    | 620.263443  | 310.635360      | 603.236894  | 302.122085       | 602.252878     | 301.630077       | 5  |
| 11 | 1196.615739 | 598.811508      | 1179.589190 | 590.298233       | 1178.605174    | 589.806225       | N    | 533.231415  | 267.119346      | 516.204866  | 258.606071       | 515.220850     | 258.114063       | 4  |
| 12 | 1325.658332 | 663.332804      | 1308.631783 | 654.819530       | 1307.647767    | 654.327522       | E    | 419.188488  | 210.097882      | 402.161939  | 201.584608       | 401.177923     | 201.092600       | 3  |
| 13 | 1440.685275 | 720.846276      | 1423.658726 | 712.333001       | 1422.674710    | 711.840993       | D    | 290.145895  | 145.576585      | 273.119346  | 137.063311       | 272.135330     | 136.571303       | 2  |
| 14 |             |                 |             |                  |                |                  | R    | 175.118952  | 88.063114       | 158.092403  | 79.549839        |                |                  | 1  |

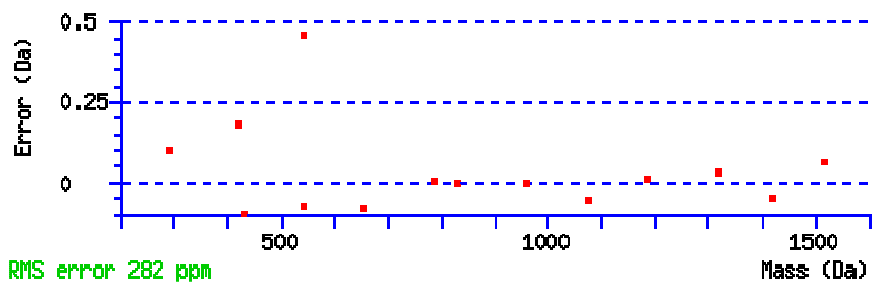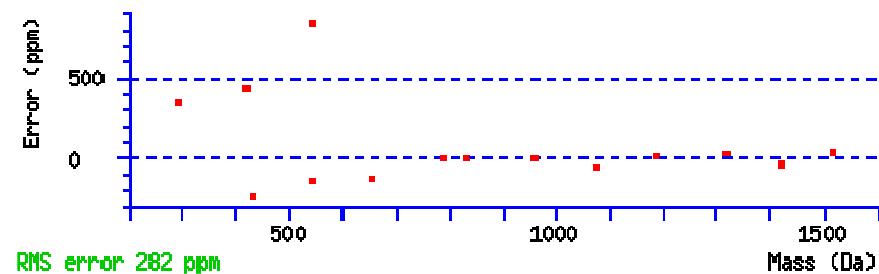

All matches to this query

| Score | Mr(calc):   | Delta     | Sequence                        |
|-------|-------------|-----------|---------------------------------|
| 87.7  | 1613.789642 | 0.002466  | <a href="#">AVTELNEPLSNEDR</a>  |
| 20.7  | 1613.800919 | -0.008811 | <a href="#">VVTQNSSSGNVTHEK</a> |
| 8.5   | 1613.783127 | 0.008981  | <a href="#">NHSMGHISKSSDK</a>   |
| 7.6   | 1613.804901 | -0.012793 | <a href="#">AGSGQLHYSIPEEAK</a> |
| 5.3   | 1613.797043 | -0.004935 | <a href="#">KEADPEDGKPVMDK</a>  |

|     |             |          |                                |
|-----|-------------|----------|--------------------------------|
| 3.3 | 1611.792648 | 1.999460 | <a href="#">GNKELVSGGSCYTK</a> |
| 3.1 | 1613.776642 | 0.015466 | <a href="#">TCHDMVSPAGTRVR</a> |
| 1.6 | 1613.779312 | 0.012796 | <a href="#">QLFKGTVEQMSQM</a>  |
| 1.6 | 1613.789627 | 0.002481 | <a href="#">VQALEEANNDLENK</a> |
| 1.4 | 1612.792572 | 0.999536 | <a href="#">LHMPMNRNRRDK</a>   |

MS/MS Fragmentation of **CDEPILSNR**

Found in **IPI00219446.5**, Tax\_Id=9606 Gene\_Symbol=PEBP1 Phosphatidylethanolamine-binding protein 1

Match to Query 4005: 1130.540558 from(566.277555,2+)

Title: Elution from: 23.62 to 27.54 period: FD070412dMavril06.raw experiment: 1 cycles: 1 precIntensity: 388387.9 FinneganScanNumber: 1455

Data file D:\projecttemp\FD080412dM\FD070412dMavril06.msm

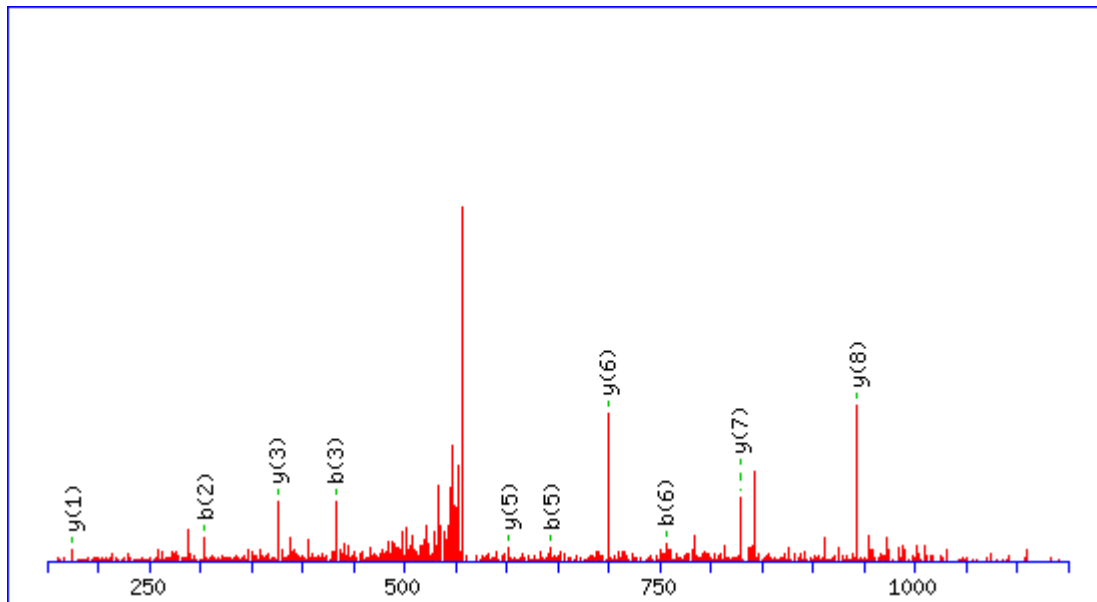

**Monoisotopic mass of neutral peptide Mr(calc):** 1130.538986

**Fixed modifications:** Carbamidomethyl (C)

**Variable modifications:**

**N-term :** Dimethyl (N-term)

**Ions Score:** 36 **Expect:** 0.04

**Matches (Bold Red):** 10/76 fragment ions using 26 most intense peaks

| # | b                 | b <sup>++</sup> | b <sup>*</sup> | b <sup>*++</sup> | b <sup>0</sup> | b <sup>0++</sup> | Seq. | y                 | y <sup>++</sup> | y <sup>*</sup> | y <sup>*++</sup> | y <sup>0</sup> | y <sup>0++</sup> | # |
|---|-------------------|-----------------|----------------|------------------|----------------|------------------|------|-------------------|-----------------|----------------|------------------|----------------|------------------|---|
| 1 | 189.069221        | 95.038248       |                |                  |                |                  | C    |                   |                 |                |                  |                |                  | 9 |
| 2 | <b>304.096164</b> | 152.551720      |                |                  | 286.085599     | 143.546437       | D    | <b>943.484335</b> | 472.245806      | 926.457786     | 463.732531       | 925.473770     | 463.240523       | 8 |
| 3 | <b>433.138757</b> | 217.073016      |                |                  | 415.128192     | 208.067734       | E    | <b>828.457392</b> | 414.732334      | 811.430843     | 406.219060       | 810.446827     | 405.727052       | 7 |
| 4 | 530.191521        | 265.599399      |                |                  | 512.180956     | 256.594116       | P    | <b>699.414799</b> | 350.211038      | 682.388250     | 341.697763       | 681.404234     | 341.205755       | 6 |
| 5 | <b>643.275585</b> | 322.141431      |                |                  | 625.265020     | 313.136148       | I    | <b>602.362035</b> | 301.684656      | 585.335486     | 293.171381       | 584.351470     | 292.679373       | 5 |
| 6 | <b>756.359649</b> | 378.683463      |                |                  | 738.349084     | 369.678180       | L    | 489.277971        | 245.142623      | 472.251422     | 236.629349       | 471.267406     | 236.137341       | 4 |
| 7 | 843.391677        | 422.199477      |                |                  | 825.381112     | 413.194194       | S    | <b>376.193907</b> | 188.600591      | 359.167358     | 180.087317       | 358.183342     | 179.595309       | 3 |
| 8 | 957.434604        | 479.220940      | 940.408055     | 470.707666       | 939.424039     | 470.215658       | N    | 289.161879        | 145.084577      | 272.135330     | 136.571303       |                |                  | 2 |
| 9 |                   |                 |                |                  |                |                  | R    | <b>175.118952</b> | 88.063114       | 158.092403     | 79.549840        |                |                  | 1 |

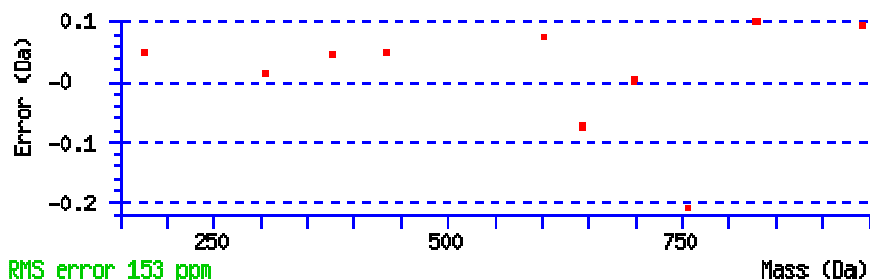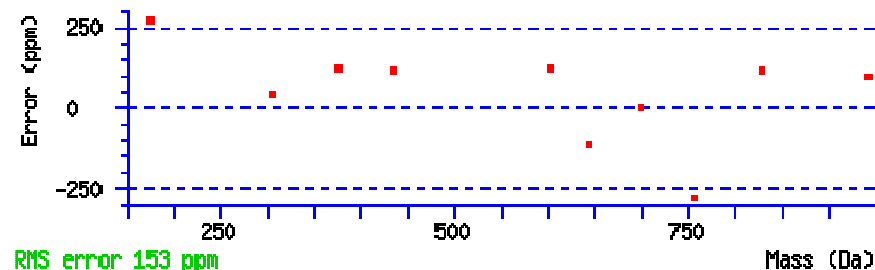

All matches to this query

| Score | Mr(calc):   | Delta     | Sequence                    |
|-------|-------------|-----------|-----------------------------|
| 35.8  | 1130.538986 | 0.001572  | <a href="#">CDEPILSNR</a>   |
| 12.2  | 1128.541077 | 1.999481  | <a href="#">ASDNEEAPLR</a>  |
| 11.4  | 1129.543716 | 0.996842  | <a href="#">EKMHEQEK</a>    |
| 10.0  | 1130.543030 | -0.002472 | <a href="#">ISMTEFTEK</a>   |
| 9.4   | 1128.534592 | 2.005966  | <a href="#">SVDECKVHR</a>   |
| 9.4   | 1128.523346 | 2.017212  | <a href="#">SVDECNLHK</a>   |
| 9.2   | 1130.546875 | -0.006317 | <a href="#">EVFHAGTSQR</a>  |
| 9.2   | 1128.529877 | 2.010681  | <a href="#">EGPGDPSSDLK</a> |
| 8.8   | 1130.538971 | 0.001587  | <a href="#">EAGKCPEER</a>   |
| 8.8   | 1128.531189 | 2.009369  | <a href="#">GEAPWREER</a>   |





MS/MS Fragmentation of **DINAVAASLR**

Found in **IPI00180128.4**, Tax\_Id=9606 Gene\_Symbol=BZW1 Isoform 2 of Basic leucine zipper and W2 domain-containing protein 1

Match to Query 3543: 1056.595132 from(529.304842,2+)

Title: Elution from: 36.74 to 40.54 period: FD070412dMavril05.raw experiment: 1 cycles: 1 precIntensity: 2379784.9 FinneganScanNumber: 2468

Data file D:\projecttemp\FD080412dM\FD070412dMavril05.msm

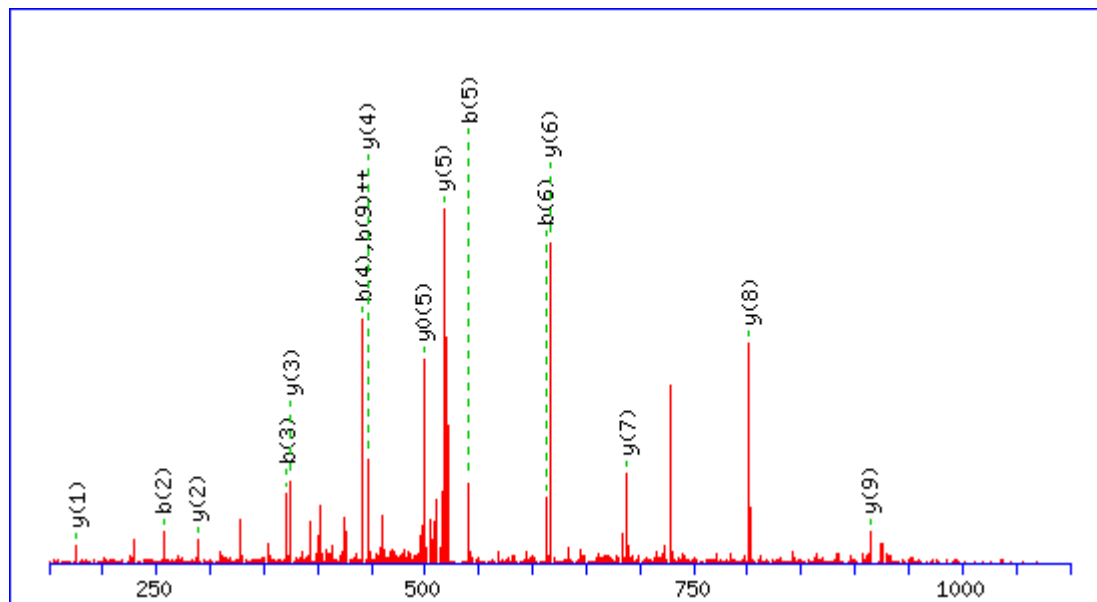

**Monoisotopic mass of neutral peptide Mr(calc):** 1056.592728

**Fixed modifications:** Carbamidomethyl (C)

**Variable modifications:**

**N-term :** Dimethyl (N-term)

**Ions Score:** 64 **Expect:** 0.00011

**Matches (Bold Red):** 16/100 fragment ions using 55 most intense peaks

| #  | b                 | b <sup>++</sup>   | b <sup>*</sup> | b <sup>*++</sup> | b <sup>0</sup> | b <sup>0++</sup> | Seq. | y                 | y <sup>++</sup> | y <sup>*</sup> | y <sup>*++</sup> | y <sup>0</sup>    | y <sup>0++</sup> | #  |
|----|-------------------|-------------------|----------------|------------------|----------------|------------------|------|-------------------|-----------------|----------------|------------------|-------------------|------------------|----|
| 1  | 144.065515        | 72.536395         |                |                  | 126.054950     | 63.531113        | D    |                   |                 |                |                  |                   |                  | 10 |
| 2  | <b>257.149579</b> | 129.078427        |                |                  | 239.139014     | 120.073145       | I    | <b>914.541791</b> | 457.774534      | 897.515242     | 449.261259       | 896.531226        | 448.769251       | 9  |
| 3  | <b>371.192506</b> | 186.099891        | 354.165957     | 177.586616       | 353.181941     | 177.094608       | N    | <b>801.457727</b> | 401.232502      | 784.431178     | 392.719227       | 783.447162        | 392.227219       | 8  |
| 4  | <b>442.229620</b> | 221.618448        | 425.203071     | 213.105174       | 424.219055     | 212.613166       | A    | <b>687.414800</b> | 344.211038      | 670.388251     | 335.697764       | 669.404235        | 335.205756       | 7  |
| 5  | <b>541.298034</b> | 271.152655        | 524.271485     | 262.639381       | 523.287469     | 262.147373       | V    | <b>616.377686</b> | 308.692481      | 599.351137     | 300.179206       | 598.367121        | 299.687198       | 6  |
| 6  | <b>612.335148</b> | 306.671212        | 595.308599     | 298.157938       | 594.324583     | 297.665930       | A    | <b>517.309272</b> | 259.158274      | 500.282723     | 250.644999       | <b>499.298707</b> | 250.152991       | 5  |
| 7  | 683.372262        | 342.189769        | 666.345713     | 333.676494       | 665.361697     | 333.184486       | A    | <b>446.272158</b> | 223.639717      | 429.245609     | 215.126442       | 428.261593        | 214.634434       | 4  |
| 8  | 770.404290        | 385.705783        | 753.377741     | 377.192508       | 752.393725     | 376.700500       | S    | <b>375.235044</b> | 188.121160      | 358.208495     | 179.607885       | 357.224479        | 179.115877       | 3  |
| 9  | 883.488354        | <b>442.247815</b> | 866.461805     | 433.734540       | 865.477789     | 433.242532       | L    | <b>288.203016</b> | 144.605146      | 271.176467     | 136.091871       |                   |                  | 2  |
| 10 |                   |                   |                |                  |                |                  | R    | <b>175.118952</b> | 88.063114       | 158.092403     | 79.549839        |                   |                  | 1  |

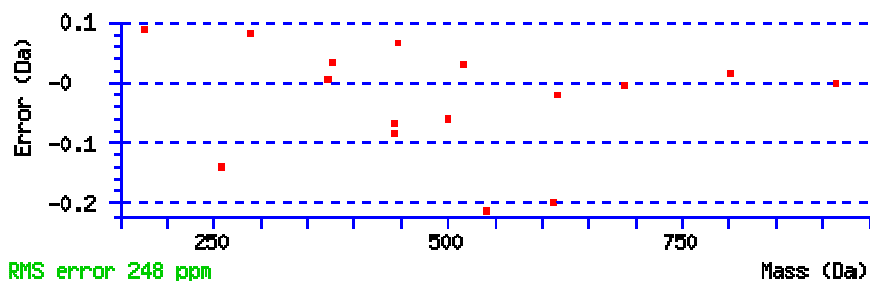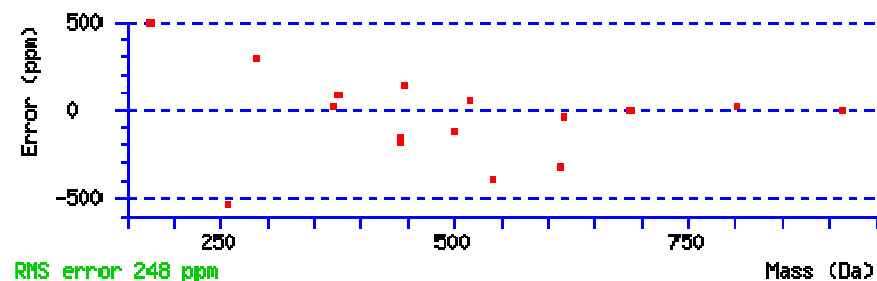

#### All matches to this query

| Score | Mr(calc):   | Delta     | Sequence                   |
|-------|-------------|-----------|----------------------------|
| 64.3  | 1056.592728 | 0.002404  | <a href="#">DINAVAASLR</a> |
| 16.0  | 1056.600113 | -0.004981 | <a href="#">LEMPASLR</a>   |
| 15.5  | 1056.603958 | -0.008826 | <a href="#">QREVADKR</a>   |
| 14.4  | 1055.594772 | 1.000360  | <a href="#">LAANARERR</a>  |
| 13.9  | 1056.592712 | 0.002420  | <a href="#">KADAAANQGK</a> |
| 13.3  | 1056.600128 | -0.004996 | <a href="#">SMKSPPAGVK</a> |
| 12.2  | 1056.603958 | -0.008826 | <a href="#">DARGALSALR</a> |
| 11.7  | 1056.600128 | -0.004996 | <a href="#">SMKSPPAGVK</a> |
| 10.8  | 1055.586243 | 1.008889  | <a href="#">ESIPLNDLK</a>  |



MS/MS Fragmentation of **DLHDANTDLIGR**

Found in **IPI00024650.1**, Tax\_Id=9606 Gene\_Symbol=SLC16A1 Monocarboxylate transporter 1

Match to Query 4511: 1366.685866 from(684.350209,2+)

Title: Elution from: 28.41 to 32.31 period: FD070412dMavril07.raw experiment: 1 cycles: 1 precIntensity: 1058476.6 FinneganScanNumber: 1995

Data file D:\projecttemp\FD080412dM\FD070412dMavril07.msm

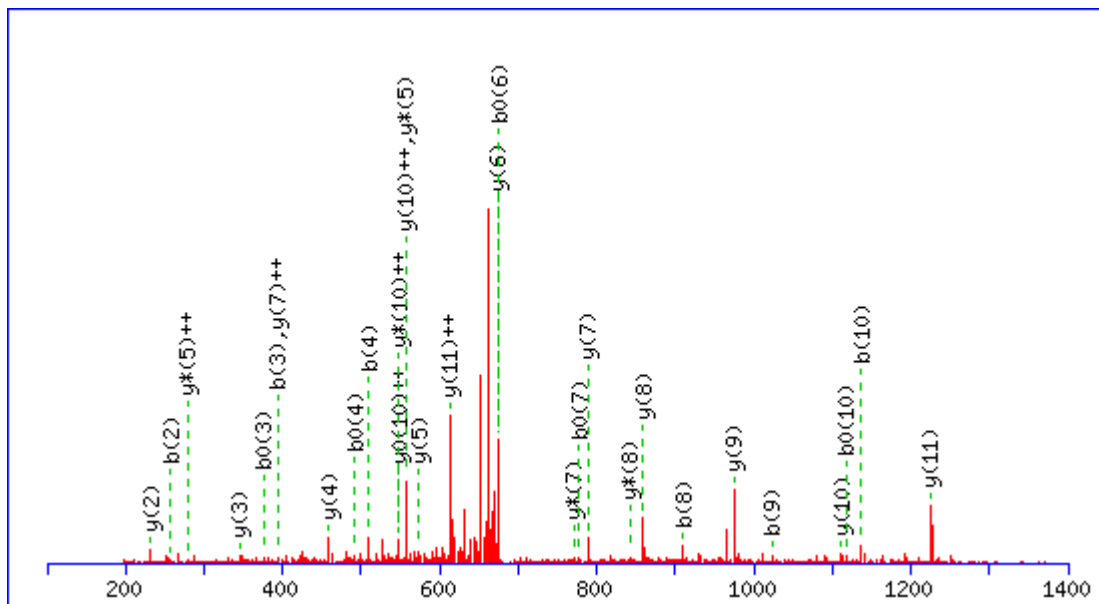

**Monoisotopic mass of neutral peptide Mr(calc):** 1366.684082

**Fixed modifications:** Carbamidomethyl (C)

**Variable modifications:**

**N-term :** Dimethyl (N-term)

**Ions Score:** 44 **Expect:** 0.012

**Matches (Bold Red):** 30/114 fragment ions using 88 most intense peaks

| #  | b                  | b <sup>++</sup> | b*          | b <sup>*++</sup> | b <sup>0</sup>     | b <sup>0++</sup> | Seq. | y                  | y <sup>++</sup>   | y*                | y <sup>*++</sup>  | y <sup>0</sup> | y <sup>0++</sup>  | #  |
|----|--------------------|-----------------|-------------|------------------|--------------------|------------------|------|--------------------|-------------------|-------------------|-------------------|----------------|-------------------|----|
| 1  | 144.065515         | 72.536395       |             |                  | 126.054950         | 63.531113        | D    |                    |                   |                   |                   |                |                   | 12 |
| 2  | <b>257.149579</b>  | 129.078427      |             |                  | 239.139014         | 120.073145       | L    | <b>1224.633126</b> | <b>612.820201</b> | 1207.606577       | 604.306926        | 1206.622561    | 603.814918        | 11 |
| 3  | <b>394.208491</b>  | 197.607883      |             |                  | <b>376.197926</b>  | 188.602601       | H    | <b>1111.549062</b> | <b>556.278169</b> | 1094.522513       | <b>547.764894</b> | 1093.538497    | <b>547.272886</b> | 10 |
| 4  | <b>509.235434</b>  | 255.121355      |             |                  | <b>491.224869</b>  | 246.116073       | D    | <b>974.490150</b>  | 487.748713        | 957.463601        | 479.235438        | 956.479585     | 478.743430        | 9  |
| 5  | 580.272548         | 290.639912      |             |                  | 562.261983         | 281.634630       | A    | <b>859.463207</b>  | 430.235241        | <b>842.436658</b> | 421.721967        | 841.452642     | 421.229959        | 8  |
| 6  | 694.315475         | 347.661376      | 677.288926  | 339.148101       | <b>676.304910</b>  | 338.656093       | N    | <b>788.426093</b>  | <b>394.716684</b> | <b>771.399544</b> | 386.203410        | 770.415528     | 385.711402        | 7  |
| 7  | 795.363154         | 398.185215      | 778.336605  | 389.671941       | <b>777.352589</b>  | 389.179933       | T    | <b>674.383166</b>  | 337.695221        | 657.356617        | 329.181946        | 656.372601     | 328.689938        | 6  |
| 8  | <b>910.390097</b>  | 455.698687      | 893.363548  | 447.185412       | 892.379532         | 446.693404       | D    | <b>573.335487</b>  | 287.171381        | <b>556.308938</b> | <b>278.658107</b> | 555.324922     | 278.166099        | 5  |
| 9  | <b>1023.474161</b> | 512.240718      | 1006.447612 | 503.727444       | 1005.463596        | 503.235436       | L    | <b>458.308544</b>  | 229.657910        | 441.281995        | 221.144635        |                |                   | 4  |
| 10 | <b>1136.558225</b> | 568.782751      | 1119.531676 | 560.269476       | <b>1118.547660</b> | 559.777468       | I    | <b>345.224480</b>  | 173.115878        | 328.197931        | 164.602603        |                |                   | 3  |
| 11 | 1193.579689        | 597.293482      | 1176.553140 | 588.780208       | 1175.569124        | 588.288200       | G    | <b>232.140416</b>  | 116.573846        | 215.113867        | 108.060571        |                |                   | 2  |
| 12 |                    |                 |             |                  |                    |                  | R    | 175.118952         | 88.063114         | 158.092403        | 79.549839         |                |                   | 1  |

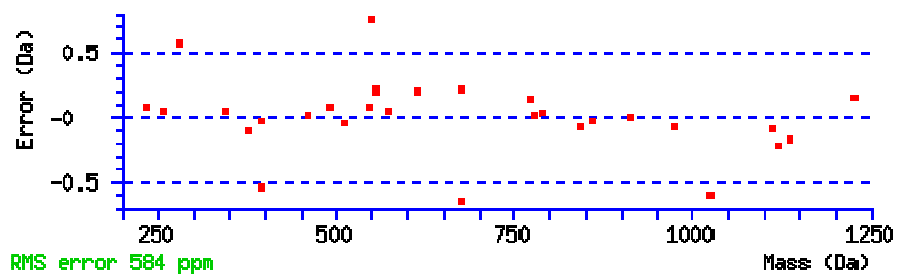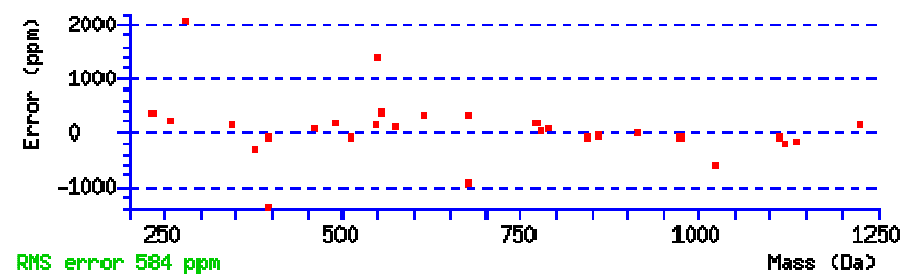

All matches to this query

| Score | Mr(calc):   | Delta     | Sequence                        |
|-------|-------------|-----------|---------------------------------|
| 43.9  | 1366.684082 | 0.001784  | <a href="#">DLHDANTDLIGR</a>    |
| 7.4   | 1366.680237 | 0.005629  | <a href="#">NLGMTDAFELGK</a>    |
| 6.4   | 1366.691467 | -0.005601 | <a href="#">NMLFSGTNIAAGK</a>   |
| 6.0   | 1366.680252 | 0.005614  | <a href="#">LDFSDTMVQOK</a>     |
| 1.9   | 1366.695312 | -0.009446 | <a href="#">NSEAGGAGPGPGKGR</a> |
| 0.1   | 1366.680206 | 0.005660  | <a href="#">EKFDNEMKDK</a>      |

MS/MS Fragmentation of **DVFISAAER**

Found in **IPI0025019.3**, Tax\_Id=9606 Gene\_Symbol=PSMB1 Proteasome subunit beta type-1

Match to Query 3563: 1035.545448 from(518.780000,2+)

Title: Elution from: 31.73 to 35.57 period: FD070412dMavril06.raw experiment: 1 cycles: 1 precIntensity: 0.0 FinneganScanNumber: 2071

Data file D:\projecttemp\FD080412dM\FD070412dMavril06.msm

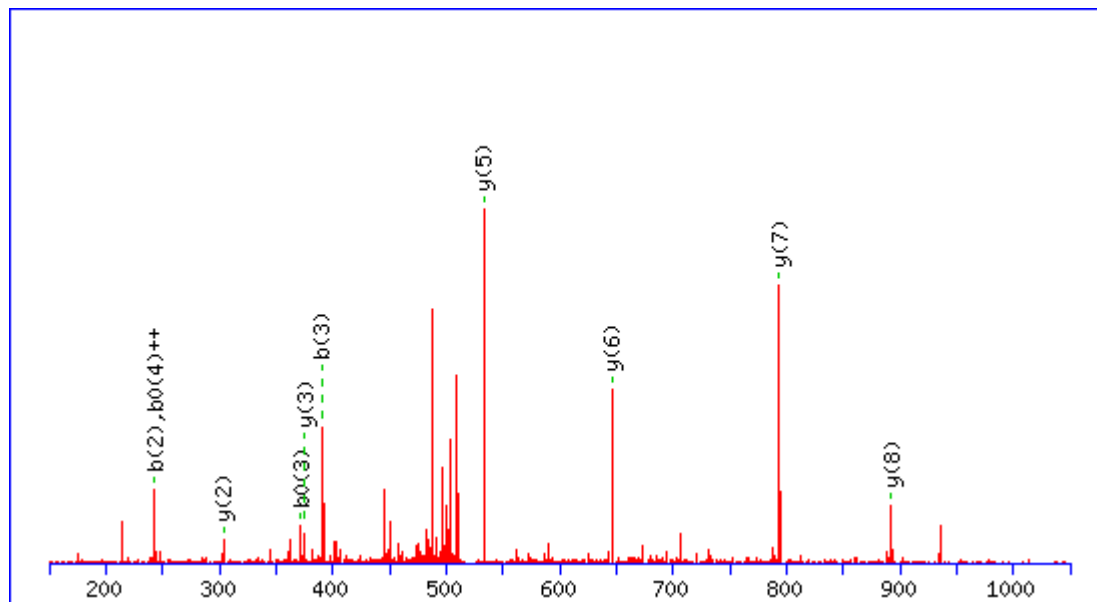

**Monoisotopic mass of neutral peptide Mr(calc):** 1034.539642

**Fixed modifications:** Carbamidomethyl (C)

**Variable modifications:**

**N-term :** Dimethyl (N-term)

**Ions Score:** 40 **Expect:** 0.039

**Matches (Bold Red):** 10/78 fragment ions using 20 most intense peaks

| # | b                 | b <sup>++</sup> | b <sup>0</sup>    | b <sup>0++</sup>  | Seq. | y                 | y <sup>++</sup> | y <sup>*</sup> | y <sup>*++</sup> | y <sup>0</sup> | y <sup>0++</sup> | # |
|---|-------------------|-----------------|-------------------|-------------------|------|-------------------|-----------------|----------------|------------------|----------------|------------------|---|
| 1 | 144.065515        | 72.536395       | 126.054950        | 63.531113         | D    |                   |                 |                |                  |                |                  | 9 |
| 2 | <b>243.133929</b> | 122.070602      | 225.123364        | 113.065320        | V    | <b>892.488693</b> | 446.747985      | 875.462144     | 438.234710       | 874.478128     | 437.742702       | 8 |
| 3 | <b>390.202343</b> | 195.604809      | <b>372.191778</b> | 186.599527        | F    | <b>793.420279</b> | 397.213778      | 776.393730     | 388.700503       | 775.409714     | 388.208495       | 7 |
| 4 | 503.286407        | 252.146841      | 485.275842        | <b>243.141559</b> | I    | <b>646.351865</b> | 323.679571      | 629.325316     | 315.166296       | 628.341300     | 314.674288       | 6 |
| 5 | 590.318435        | 295.662856      | 572.307870        | 286.657573        | S    | <b>533.267801</b> | 267.137539      | 516.241252     | 258.624264       | 515.257236     | 258.132256       | 5 |
| 6 | 661.355549        | 331.181413      | 643.344984        | 322.176130        | A    | 446.235773        | 223.621524      | 429.209224     | 215.108250       | 428.225208     | 214.616242       | 4 |
| 7 | 732.392663        | 366.699970      | 714.382098        | 357.694687        | A    | <b>375.198659</b> | 188.102968      | 358.172110     | 179.589693       | 357.188094     | 179.097685       | 3 |
| 8 | 861.435256        | 431.221266      | 843.424691        | 422.215983        | E    | <b>304.161545</b> | 152.584411      | 287.134996     | 144.071136       | 286.150980     | 143.579128       | 2 |
| 9 |                   |                 |                   |                   | R    | 175.118952        | 88.063114       | 158.092403     | 79.549840        |                |                  | 1 |

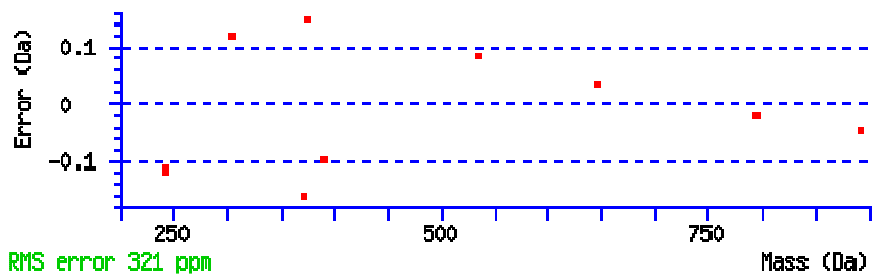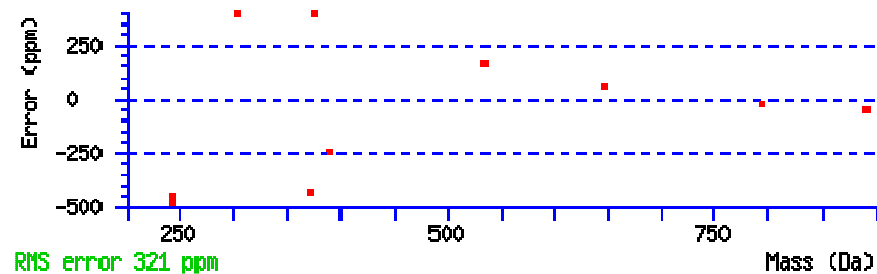

All matches to this query

| Score | Mr(calc):   | Delta    | Sequence                   |
|-------|-------------|----------|----------------------------|
| 39.5  | 1034.539642 | 1.005806 | <a href="#">DVFISAAER</a>  |
| 21.6  | 1033.547745 | 1.997703 | <a href="#">NVSKDMEK</a>   |
| 18.7  | 1034.542999 | 1.002449 | <a href="#">MNQLSASLK</a>  |
| 13.9  | 1034.531754 | 1.013694 | <a href="#">LEMLEKEK</a>   |
| 13.9  | 1034.550873 | 0.994575 | <a href="#">NQFLTERK</a>   |
| 13.9  | 1034.531769 | 1.013679 | <a href="#">TLMLNEDK</a>   |
| 13.1  | 1034.550858 | 0.994590 | <a href="#">NFRSQA EK</a>  |
| 12.2  | 1034.539627 | 1.005821 | <a href="#">EIFKDAER</a>   |
| 11.4  | 1034.543015 | 1.002433 | <a href="#">GMGQASLSLK</a> |
| 9.3   | 1034.543030 | 1.002418 | <a href="#">NVGMTVSQK</a>  |





MS/MS Fragmentation of **DVNQEFVR**

Found in **IPI00215780.5**, Tax\_Id=9606 Gene\_Symbol=RPS19 40S ribosomal protein S19

Match to Query 4091: 1161.581114 from(581.797833,2+)

Title: Elution from: 25.66 to 29.51 period: FD070412dMavril06.raw experiment: 1 cycles: 1 precIntensity: 540998.0 FinneganScanNumber: 1598

Data file D:\projecttemp\FD080412dM\FD070412dMavril06.msm

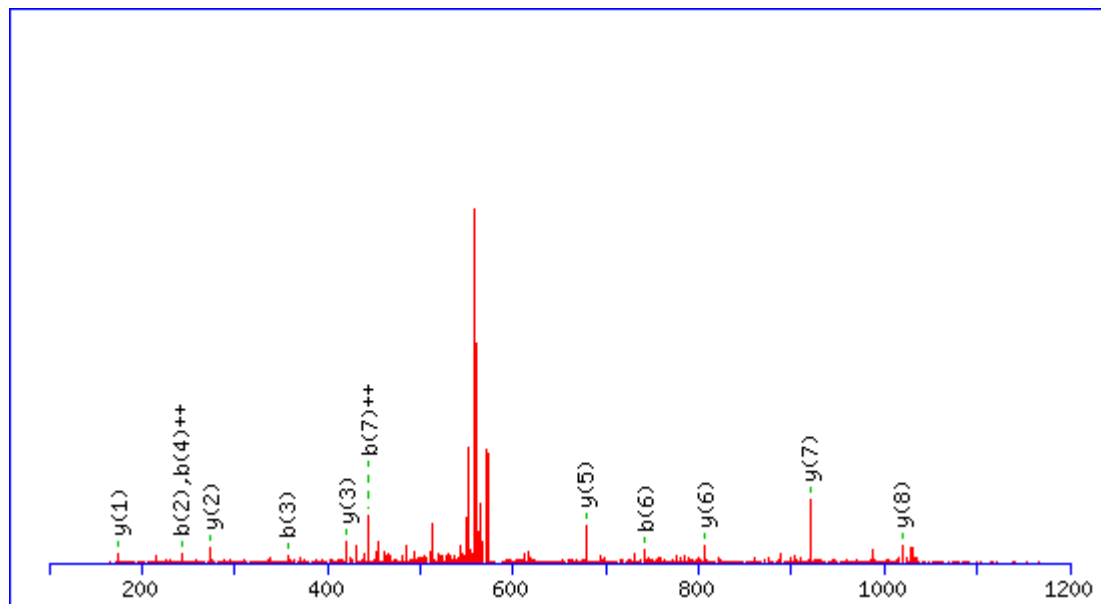

**Monoisotopic mass of neutral peptide Mr(calc):** 1161.577835

**Fixed modifications:** Carbamidomethyl (C)

**Variable modifications:**

**N-term :** Dimethyl (N-term)

**Ions Score:** 57 **Expect:** 0.00061

**Matches (Bold Red):** 12/86 fragment ions using 27 most intense peaks

| # | b                 | b <sup>++</sup>   | b <sup>*</sup> | b <sup>*++</sup> | b <sup>0</sup> | b <sup>0++</sup> | Seq. | y                  | y <sup>++</sup> | y <sup>*</sup> | y <sup>*++</sup> | y <sup>0</sup> | y <sup>0++</sup> | # |
|---|-------------------|-------------------|----------------|------------------|----------------|------------------|------|--------------------|-----------------|----------------|------------------|----------------|------------------|---|
| 1 | 144.065515        | 72.536395         |                |                  | 126.054950     | 63.531113        | D    |                    |                 |                |                  |                |                  | 9 |
| 2 | <b>243.133929</b> | 122.070602        |                |                  | 225.123364     | 113.065320       | V    | <b>1019.526870</b> | 510.267073      | 1002.500321    | 501.753799       | 1001.516305    | 501.261791       | 8 |
| 3 | <b>357.176856</b> | 179.092066        | 340.150307     | 170.578791       | 339.166291     | 170.086783       | N    | <b>920.458456</b>  | 460.732866      | 903.431907     | 452.219591       | 902.447891     | 451.727583       | 7 |
| 4 | 485.235434        | <b>243.121355</b> | 468.208885     | 234.608080       | 467.224869     | 234.116073       | Q    | <b>806.415529</b>  | 403.711403      | 789.388980     | 395.198128       | 788.404964     | 394.706120       | 6 |
| 5 | 613.294012        | 307.150644        | 596.267463     | 298.637370       | 595.283447     | 298.145362       | Q    | <b>678.356951</b>  | 339.682114      | 661.330402     | 331.168839       | 660.346386     | 330.676831       | 5 |
| 6 | <b>742.336605</b> | 371.671941        | 725.310056     | 363.158666       | 724.326040     | 362.666658       | E    | 550.298373         | 275.652825      | 533.271824     | 267.139550       | 532.287808     | 266.647542       | 4 |
| 7 | 889.405019        | <b>445.206148</b> | 872.378470     | 436.692873       | 871.394454     | 436.200865       | F    | <b>421.255780</b>  | 211.131528      | 404.229231     | 202.618253       |                |                  | 3 |
| 8 | 988.473433        | 494.740355        | 971.446884     | 486.227080       | 970.462868     | 485.735072       | V    | <b>274.187366</b>  | 137.597321      | 257.160817     | 129.084046       |                |                  | 2 |
| 9 |                   |                   |                |                  |                |                  | R    | <b>175.118952</b>  | 88.063114       | 158.092403     | 79.549839        |                |                  | 1 |

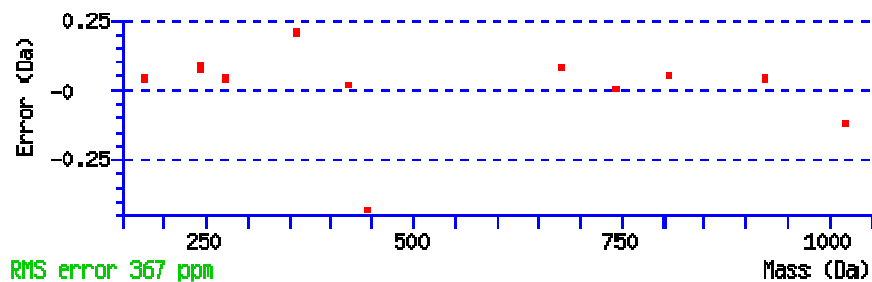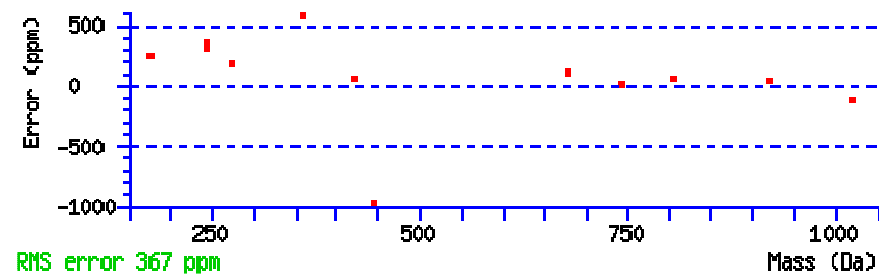

All matches to this query

| Score | Mr(calc):   | Delta     | Sequence                    |
|-------|-------------|-----------|-----------------------------|
| 57.1  | 1161.577835 | 0.003279  | <a href="#">DVNQQEFVR</a>   |
| 19.5  | 1160.567307 | 1.013807  | <a href="#">IENSDSLEVR</a>  |
| 18.9  | 1161.581177 | -0.000063 | <a href="#">NAKDAGEMVR</a>  |
| 17.6  | 1161.592422 | -0.011308 | <a href="#">SQLSQCKQR</a>   |
| 13.5  | 1161.581192 | -0.000078 | <a href="#">VTRSNMSPDK</a>  |
| 12.4  | 1161.585220 | -0.004106 | <a href="#">DVEIQFMR</a>    |
| 11.8  | 1161.592392 | -0.011278 | <a href="#">MEKNGNRRK</a>   |
| 11.5  | 1161.569916 | 0.011198  | <a href="#">ELNKEMAAEK</a>  |
| 11.2  | 1159.580795 | 2.000319  | <a href="#">VINMSYHPR</a>   |
| 10.2  | 1159.584167 | 1.996947  | <a href="#">LCGPMLAAGAR</a> |



MS/MS Fragmentation of **EALENANTNTEVLK**

Found in **IPI00025974.3**, Tax\_Id=9606 Gene\_Symbol=CHMP4B Charged multivesicular body protein 4b

Match to Query 5152: 1601.835086 from(801.924819,2+)

Title: Elution from: 26.68 to 30.56 period: FD070412dMavril07.raw experiment: 1 cycles: 1 precIntensity: 95004.4 FinneganScanNumber: 1856

Data file D:\projecttemp\FD080412dM\FD070412dMavril07.msm

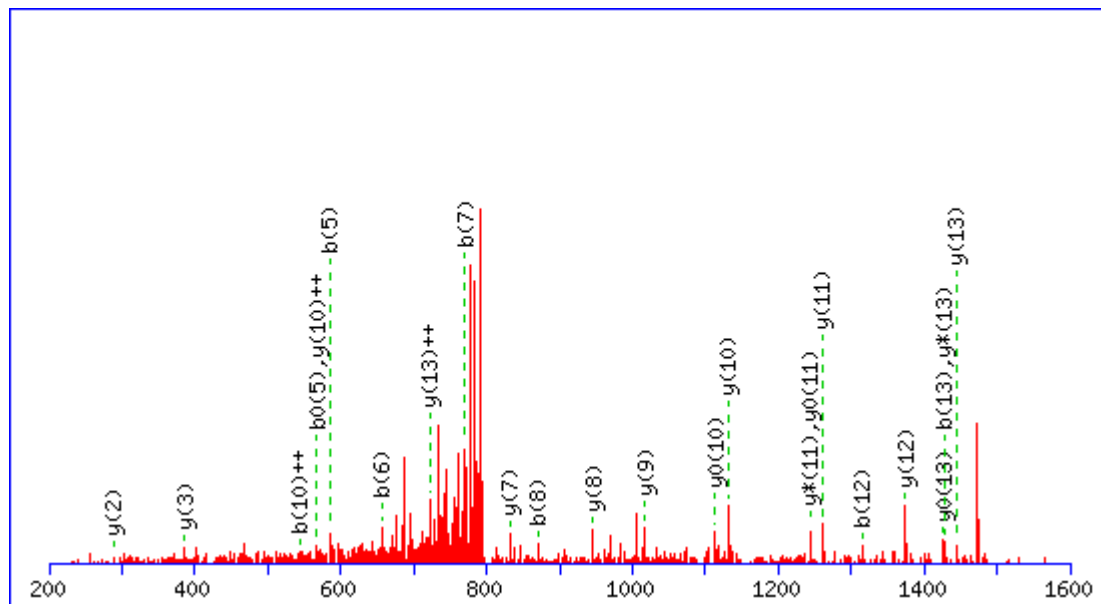

**Monoisotopic mass of neutral peptide Mr(calc):** 1600.830765

**Fixed modifications:** Carbamidomethyl (C)

**Variable modifications:**

**N-term :** Dimethyl (N-term)

**K14 :** Dimethyl (K)

**Ions Score:** 37 **Expect:** 0.094

**Matches (Bold Red):** 24/142 fragment ions using 76 most intense peaks

| #  | b           | b <sup>++</sup> | b*          | b <sup>*++</sup> | b <sup>0</sup> | b <sup>0++</sup> | Seq. | y           | y <sup>++</sup> | y*          | y <sup>*++</sup> | y <sup>0</sup> | y <sup>0++</sup> | #  |
|----|-------------|-----------------|-------------|------------------|----------------|------------------|------|-------------|-----------------|-------------|------------------|----------------|------------------|----|
| 1  | 158.081165  | 79.544220       |             |                  | 140.070600     | 70.538938        | E    |             |                 |             |                  |                |                  | 14 |
| 2  | 229.118279  | 115.062777      |             |                  | 211.107714     | 106.057495       | A    | 1444.764195 | 722.885736      | 1427.737646 | 714.372461       | 1426.753630    | 713.880453       | 13 |
| 3  | 342.202343  | 171.604809      |             |                  | 324.191778     | 162.599527       | L    | 1373.727081 | 687.367179      | 1356.700532 | 678.853904       | 1355.716516    | 678.361896       | 12 |
| 4  | 471.244936  | 236.126106      |             |                  | 453.234371     | 227.120824       | E    | 1260.643017 | 630.825147      | 1243.616468 | 622.311872       | 1242.632452    | 621.819864       | 11 |
| 5  | 585.287863  | 293.147570      | 568.261314  | 284.634295       | 567.277298     | 284.142287       | N    | 1131.600424 | 566.303850      | 1114.573875 | 557.790576       | 1113.589859    | 557.298567       | 10 |
| 6  | 656.324977  | 328.666127      | 639.298428  | 320.152852       | 638.314412     | 319.660844       | A    | 1017.557497 | 509.282387      | 1000.530948 | 500.769112       | 999.546932     | 500.277104       | 9  |
| 7  | 770.367904  | 385.687590      | 753.341355  | 377.174315       | 752.357339     | 376.682307       | N    | 946.520383  | 473.763830      | 929.493834  | 465.250555       | 928.509818     | 464.758547       | 8  |
| 8  | 871.415583  | 436.211430      | 854.389034  | 427.698155       | 853.405018     | 427.206147       | T    | 832.477456  | 416.742366      | 815.450907  | 408.229092       | 814.466891     | 407.737084       | 7  |
| 9  | 985.458510  | 493.232893      | 968.431961  | 484.719618       | 967.447945     | 484.227610       | N    | 731.429777  | 366.218527      | 714.403228  | 357.705252       | 713.419212     | 357.213244       | 6  |
| 10 | 1086.506189 | 543.756732      | 1069.479640 | 535.243458       | 1068.495624    | 534.751450       | T    | 617.386850  | 309.197063      | 600.360301  | 300.683789       | 599.376285     | 300.191781       | 5  |
| 11 | 1215.548782 | 608.278029      | 1198.522233 | 599.764755       | 1197.538217    | 599.272747       | E    | 516.339171  | 258.673224      | 499.312622  | 250.159949       | 498.328606     | 249.667941       | 4  |
| 12 | 1314.617196 | 657.812236      | 1297.590647 | 649.298962       | 1296.606631    | 648.806954       | V    | 387.296578  | 194.151927      | 370.270029  | 185.638653       |                |                  | 3  |
| 13 | 1427.701260 | 714.354268      | 1410.674711 | 705.840994       | 1409.690695    | 705.348986       | L    | 288.228164  | 144.617720      | 271.201615  | 136.104445       |                |                  | 2  |
| 14 |             |                 |             |                  |                |                  | K    | 175.144100  | 88.075688       | 158.117551  | 79.562414        |                |                  | 1  |

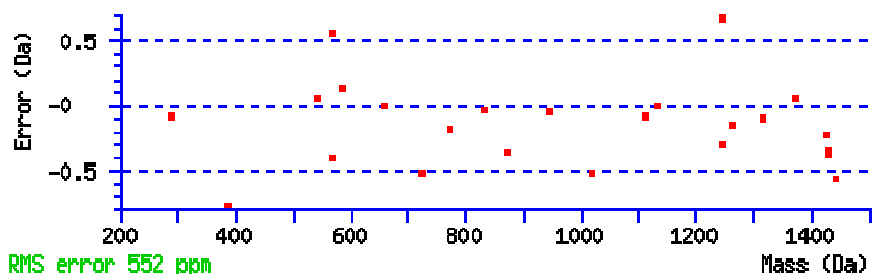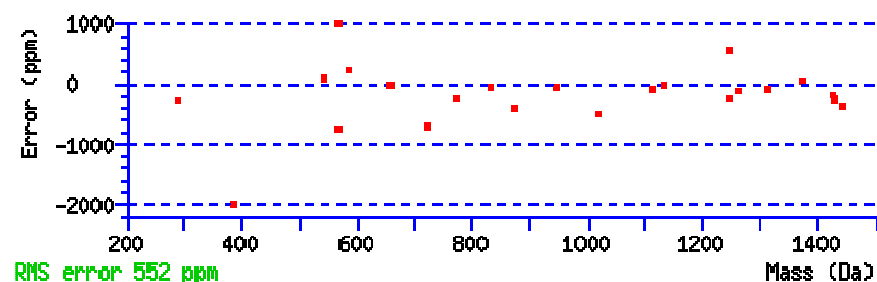

All matches to this query

| Score | Mr(calc):   | Delta    | Sequence                        |
|-------|-------------|----------|---------------------------------|
| 36.6  | 1600.830765 | 1.004321 | <a href="#">EALENANTNTEVLK</a>  |
| 14.2  | 1600.842041 | 0.993045 | <a href="#">AEISGVQGSETQVLR</a> |
| 9.3   | 1600.842010 | 0.993076 | <a href="#">EVNKTEKEIVQER</a>   |
| 7.3   | 1600.830765 | 1.004321 | <a href="#">SDGNADISEKKEPK</a>  |
| 6.2   | 1600.817047 | 1.018039 | <a href="#">YCDKEYVSLGALK</a>   |

|     |             |          |                                |
|-----|-------------|----------|--------------------------------|
| 5.7 | 1600.824280 | 1.010806 | <a href="#">TKTPERQMPSGPTK</a> |
| 4.7 | 1600.843552 | 0.991534 | <a href="#">PEKLKTLFCYFR</a>   |
| 4.2 | 1600.819534 | 1.015552 | <a href="#">EEKPDSKVEEDLK</a>  |
| 3.5 | 1601.833435 | 0.001651 | <a href="#">DIMNVENLADLLVK</a> |
| 2.9 | 1600.817078 | 1.018008 | <a href="#">PPMEPSQYVSVVPK</a> |

MS/MS Fragmentation of **EIQSSISGVTAAYNR**

Found in **IPI00009342.1**, Tax\_Id=9606 Gene\_Symbol=IQGAP1 Ras GTPase-activating-like protein IQGAP1

Match to Query 6784: 1751.875328 from(876.944940,2+)

Title: Elution from: 33.94 to 37.82 period: FD070412dMavril02.raw experiment: 1 cycles: 1 precIntensity: 137107.8 FinneganScanNumber: 2324

Data file D:\projecttemp\FD080412dM\FD070412dMavril02.msm

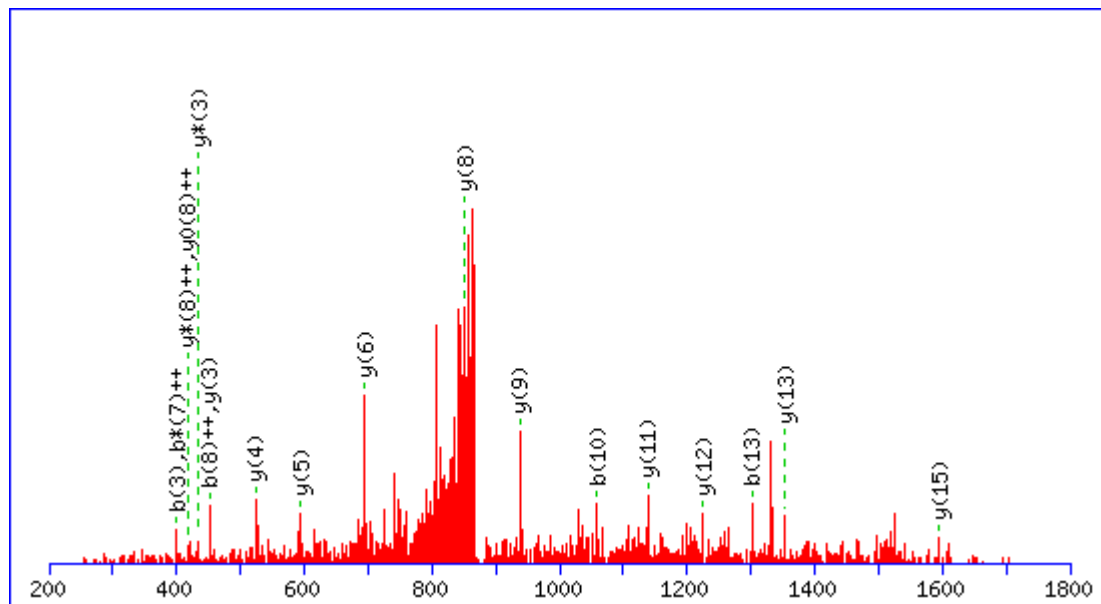

**Monoisotopic mass of neutral peptide Mr(calc):** 1751.868958

**Fixed modifications:** Carbamidomethyl (C)

**Variable modifications:**

**N-term :** Dimethyl (N-term)

**Ions Score:** 61 **Expect:** 0.00031

**Matches (Bold Red):** 18/164 fragment ions using 43 most intense peaks

| #  | b           | b <sup>++</sup> | b*          | b <sup>*++</sup> | b <sup>0</sup> | b <sup>0++</sup> | Seq. | y           | y <sup>++</sup> | y*          | y <sup>*++</sup> | y <sup>0</sup> | y <sup>0++</sup> | #  |
|----|-------------|-----------------|-------------|------------------|----------------|------------------|------|-------------|-----------------|-------------|------------------|----------------|------------------|----|
| 1  | 158.081165  | 79.544220       |             |                  | 140.070600     | 70.538938        | E    |             |                 |             |                  |                |                  | 16 |
| 2  | 287.123758  | 144.065517      |             |                  | 269.113193     | 135.060235       | E    | 1595.802376 | 798.404826      | 1578.775827 | 789.891551       | 1577.791811    | 789.399543       | 15 |
| 3  | 400.207822  | 200.607549      |             |                  | 382.197257     | 191.602267       | I    | 1466.759783 | 733.883530      | 1449.733234 | 725.370255       | 1448.749218    | 724.878247       | 14 |
| 4  | 528.266400  | 264.636838      | 511.239851  | 256.123564       | 510.255835     | 255.631556       | Q    | 1353.675719 | 677.341498      | 1336.649170 | 668.828223       | 1335.665154    | 668.336215       | 13 |
| 5  | 615.298428  | 308.152852      | 598.271879  | 299.639578       | 597.287863     | 299.147570       | S    | 1225.617141 | 613.312208      | 1208.590592 | 604.798934       | 1207.606576    | 604.306926       | 12 |
| 6  | 702.330456  | 351.668866      | 685.303907  | 343.155592       | 684.319891     | 342.663584       | S    | 1138.585113 | 569.796194      | 1121.558564 | 561.282920       | 1120.574548    | 560.790912       | 11 |
| 7  | 815.414520  | 408.210898      | 798.387971  | 399.697624       | 797.403955     | 399.205616       | I    | 1051.553085 | 526.280181      | 1034.526536 | 517.766906       | 1033.542520    | 517.274898       | 10 |
| 8  | 902.446548  | 451.726912      | 885.419999  | 443.213638       | 884.435983     | 442.721630       | S    | 938.469021  | 469.738149      | 921.442472  | 461.224874       | 920.458456     | 460.732866       | 9  |
| 9  | 959.468012  | 480.237644      | 942.441463  | 471.724370       | 941.457447     | 471.232362       | G    | 851.436993  | 426.222135      | 834.410444  | 417.708860       | 833.426428     | 417.216852       | 8  |
| 10 | 1058.536426 | 529.771851      | 1041.509877 | 521.258577       | 1040.525861    | 520.766569       | V    | 794.415529  | 397.711403      | 777.388980  | 389.198128       | 776.404964     | 388.706120       | 7  |
| 11 | 1159.584105 | 580.295691      | 1142.557556 | 571.782416       | 1141.573540    | 571.290408       | T    | 695.347115  | 348.177196      | 678.320566  | 339.663921       | 677.336550     | 339.171913       | 6  |
| 12 | 1230.621219 | 615.814248      | 1213.594670 | 607.300973       | 1212.610654    | 606.808965       | A    | 594.299436  | 297.653356      | 577.272887  | 289.140082       |                |                  | 5  |
| 13 | 1301.658333 | 651.332805      | 1284.631784 | 642.819530       | 1283.647768    | 642.327522       | A    | 523.262322  | 262.134799      | 506.235773  | 253.621525       |                |                  | 4  |
| 14 | 1464.721662 | 732.864469      | 1447.695113 | 724.351195       | 1446.711097    | 723.859187       | Y    | 452.225208  | 226.616242      | 435.198659  | 218.102967       |                |                  | 3  |
| 15 | 1578.764589 | 789.885933      | 1561.738040 | 781.372658       | 1560.754024    | 780.880650       | N    | 289.161879  | 145.084577      | 272.135330  | 136.571303       |                |                  | 2  |
| 16 |             |                 |             |                  |                |                  | R    | 175.118952  | 88.063114       | 158.092403  | 79.549839        |                |                  | 1  |

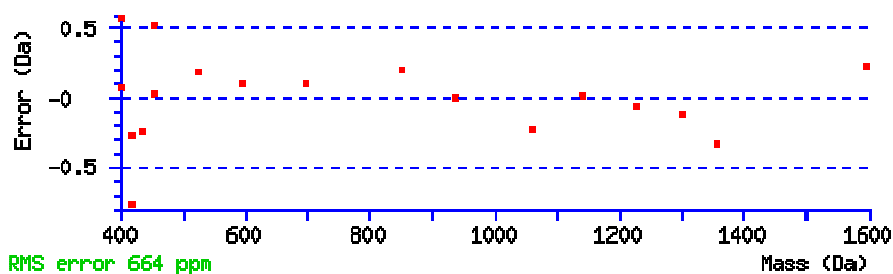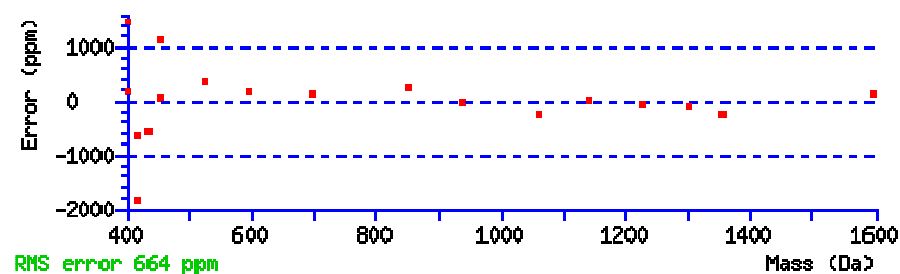

All matches to this query

| Score | Mr(calc):   | Delta     | Sequence                         |
|-------|-------------|-----------|----------------------------------|
| 60.5  | 1751.868958 | 0.006370  | <a href="#">EEIQSSISGVTAAYNR</a> |
| 6.0   | 1751.876358 | -0.001030 | <a href="#">QDKQALEVDFEKMK</a>   |
| 3.8   | 1750.856842 | 1.018486  | <a href="#">IVKKMMDTHGSWMK</a>   |



MS/MS Fragmentation of **EIDPVLDR**

Found in **IPI00007750.1**, Tax\_Id=9606 Gene\_Symbol=TUBA4A Tubulin alpha-4A chain

Match to Query 3904: 1096.614730 from(549.314641,2+)

Title: Elution from: 35.27 to 39.13 period: FD070412dMavril04.raw experiment: 1 cycles: 1 precIntensity: 1421801.9 FinneganScanNumber: 2421

Data file D:\projecttemp\FD080412dM\FD070412dMavril04.msm

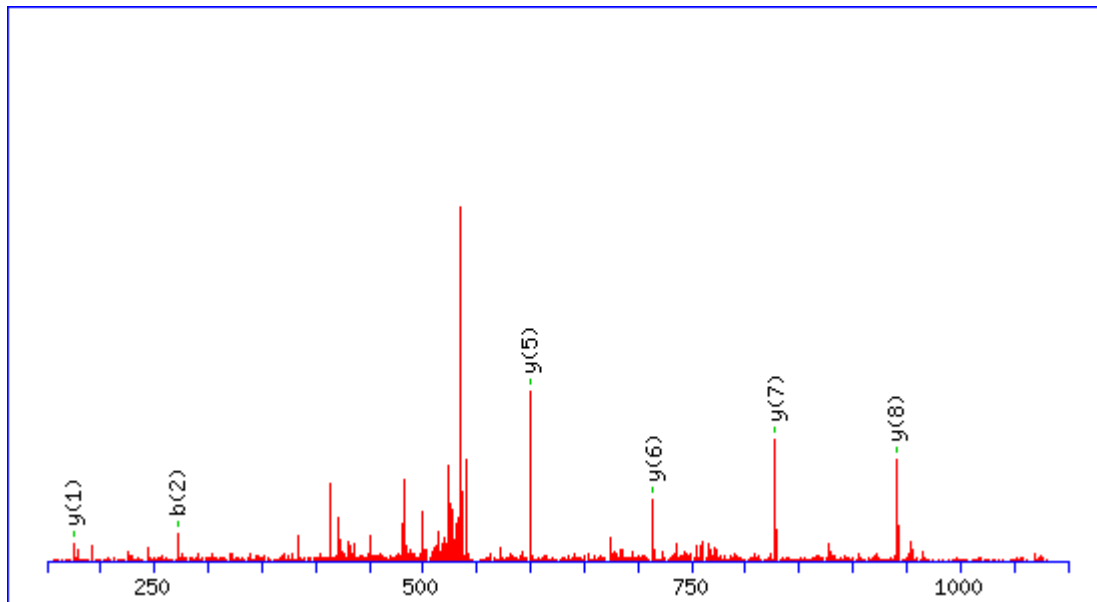

**Monoisotopic mass of neutral peptide Mr(calc):** 1096.612808

**Fixed modifications:** Carbamidomethyl (C)

**Variable modifications:**

**N-term :** Dimethyl (N-term)

**Ions Score:** 33 **Expect:** 0.13

**Matches (Bold Red):** 6/78 fragment ions using 15 most intense peaks

| # | b                 | b <sup>++</sup> | b <sup>0</sup> | b <sup>0++</sup> | Seq. | y                 | y <sup>++</sup> | y <sup>*</sup> | y <sup>*++</sup> | y <sup>0</sup> | y <sup>0++</sup> | # |
|---|-------------------|-----------------|----------------|------------------|------|-------------------|-----------------|----------------|------------------|----------------|------------------|---|
| 1 | 158.081165        | 79.544220       | 140.070600     | 70.538938        | E    |                   |                 |                |                  |                |                  | 9 |
| 2 | <b>271.165229</b> | 136.086253      | 253.154664     | 127.080970       | I    | <b>940.546208</b> | 470.776742      | 923.519659     | 462.263468       | 922.535643     | 461.771460       | 8 |
| 3 | 384.249293        | 192.628285      | 366.238728     | 183.623002       | I    | <b>827.462144</b> | 414.234710      | 810.435595     | 405.721436       | 809.451579     | 405.229428       | 7 |
| 4 | 499.276236        | 250.141756      | 481.265671     | 241.136474       | D    | <b>714.378080</b> | 357.692678      | 697.351531     | 349.179404       | 696.367515     | 348.687396       | 6 |
| 5 | 596.329000        | 298.668138      | 578.318435     | 289.662856       | P    | <b>599.351137</b> | 300.179207      | 582.324588     | 291.665932       | 581.340572     | 291.173924       | 5 |
| 6 | 695.397414        | 348.202345      | 677.386849     | 339.197063       | V    | 502.298373        | 251.652824      | 485.271824     | 243.139550       | 484.287808     | 242.647542       | 4 |
| 7 | 808.481478        | 404.744377      | 790.470913     | 395.739095       | L    | 403.229959        | 202.118617      | 386.203410     | 193.605343       | 385.219394     | 193.113335       | 3 |
| 8 | 923.508421        | 462.257849      | 905.497856     | 453.252566       | D    | 290.145895        | 145.576585      | 273.119346     | 137.063311       | 272.135330     | 136.571303       | 2 |
| 9 |                   |                 |                |                  | R    | <b>175.118952</b> | 88.063114       | 158.092403     | 79.549840        |                |                  | 1 |

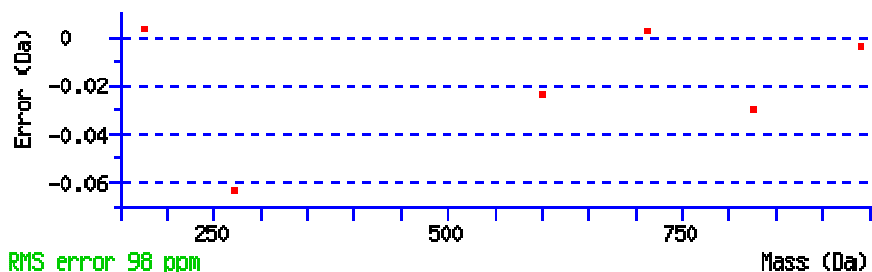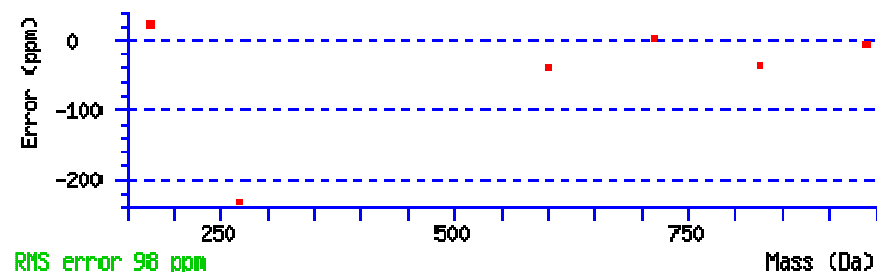

All matches to this query

| Score | Mr(calc):   | Delta     | Sequence                   |
|-------|-------------|-----------|----------------------------|
| 33.1  | 1096.612808 | 0.001922  | <a href="#">EIIDPVLDR</a>  |
| 17.1  | 1095.603622 | 1.011108  | <a href="#">KILED AHSR</a> |
| 13.7  | 1095.603622 | 1.011108  | <a href="#">KILED AHSR</a> |
| 12.6  | 1096.612793 | 0.001937  | <a href="#">EILPEVQNK</a>  |
| 12.1  | 1096.624023 | -0.009293 | <a href="#">IEIPNINTR</a>  |
| 11.8  | 1096.606262 | 0.008468  | <a href="#">ELEHMVRK</a>   |
| 11.0  | 1095.600967 | 1.013763  | <a href="#">GGRARGGQGR</a> |
| 9.5   | 1095.611023 | 1.003707  | <a href="#">GALCHLELK</a>  |
| 9.2   | 1096.606277 | 0.008453  | <a href="#">IELCPPGKR</a>  |
| 8.9   | 1096.610107 | 0.004623  | <a href="#">EEPLRGRR</a>   |

MS/MS Fragmentation of **ELGDHVTNLR**

Found in **IPI00554521.2**, Tax\_Id=9606 Gene\_Symbol=FTH1 Ferritin heavy chain

Match to Query 5146: 1182.625448 from(592.320000,2+)

Title: Elution from: 22.05 to 26.02 period: FD070412dMavril01.raw experiment: 1 cycles: 1 precIntensity: 0.0 FinneganScanNumber: 1395

Data file D:\projecttemp\FD080412dM\FD070412dMavril01.msm

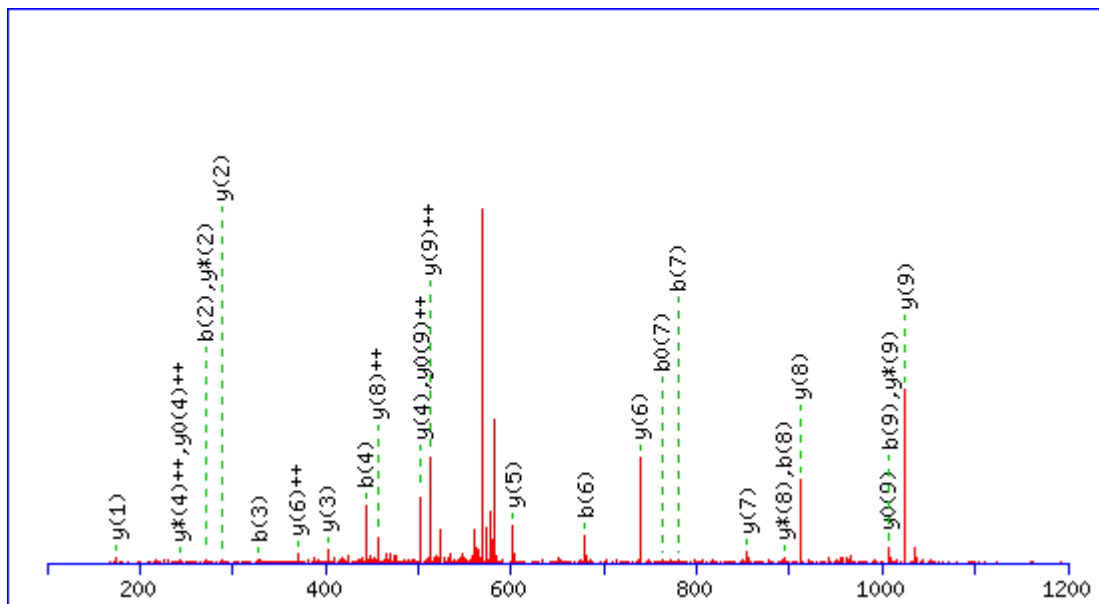

**Monoisotopic mass of neutral peptide Mr(calc):** 1180.620026

**Fixed modifications:** Carbamidomethyl (C)

**Variable modifications:**

**N-term :** Dimethyl (N-term)

**Ions Score:** 55 **Expect:** 0.00085

**Matches (Bold Red):** 27/88 fragment ions using 60 most intense peaks

| #  | b                  | b <sup>++</sup> | b*         | b <sup>*++</sup> | b <sup>0</sup>    | b <sup>0++</sup> | Seq. | y                  | y <sup>++</sup>   | y*                 | y <sup>*++</sup>  | y <sup>0</sup>     | y <sup>0++</sup>  | #  |
|----|--------------------|-----------------|------------|------------------|-------------------|------------------|------|--------------------|-------------------|--------------------|-------------------|--------------------|-------------------|----|
| 1  | 158.081165         | 79.544220       |            |                  | 140.070600        | 70.538938        | E    |                    |                   |                    |                   |                    |                   | 10 |
| 2  | <b>271.165229</b>  | 136.086253      |            |                  | 253.154664        | 127.080970       | L    | <b>1024.553419</b> | <b>512.780347</b> | <b>1007.526870</b> | 504.267073        | <b>1006.542854</b> | <b>503.775065</b> | 9  |
| 3  | <b>328.186693</b>  | 164.596984      |            |                  | 310.176128        | 155.591702       | G    | <b>911.469355</b>  | <b>456.238315</b> | <b>894.442806</b>  | 447.725041        | 893.458790         | 447.233033        | 8  |
| 4  | <b>443.213636</b>  | 222.110456      |            |                  | 425.203071        | 213.105174       | D    | <b>854.447891</b>  | 427.727584        | 837.421342         | 419.214309        | 836.437326         | 418.722301        | 7  |
| 5  | 580.272548         | 290.639912      |            |                  | 562.261983        | 281.634630       | H    | <b>739.420948</b>  | <b>370.214112</b> | 722.394399         | 361.700837        | 721.410383         | 361.208829        | 6  |
| 6  | <b>679.340962</b>  | 340.174119      |            |                  | 661.330397        | 331.168836       | V    | <b>602.362036</b>  | 301.684656        | 585.335487         | 293.171381        | 584.351471         | 292.679373        | 5  |
| 7  | <b>780.388641</b>  | 390.697959      |            |                  | <b>762.378076</b> | 381.692676       | T    | <b>503.293622</b>  | 252.150449        | 486.267073         | <b>243.637174</b> | 485.283057         | <b>243.145166</b> | 4  |
| 8  | <b>894.431568</b>  | 447.719422      | 877.405019 | 439.206147       | 876.421003        | 438.714139       | N    | <b>402.245943</b>  | 201.626609        | 385.219394         | 193.113335        |                    |                   | 3  |
| 9  | <b>1007.515632</b> | 504.261454      | 990.489083 | 495.748179       | 989.505067        | 495.256171       | L    | <b>288.203016</b>  | 144.605146        | <b>271.176467</b>  | 136.091871        |                    |                   | 2  |
| 10 |                    |                 |            |                  |                   |                  | R    | <b>175.118952</b>  | 88.063114         | 158.092403         | 79.549839         |                    |                   | 1  |

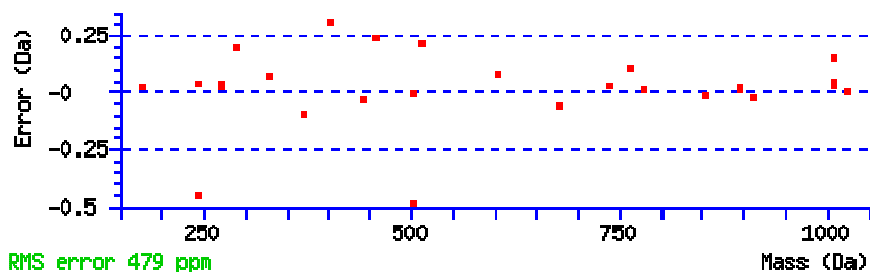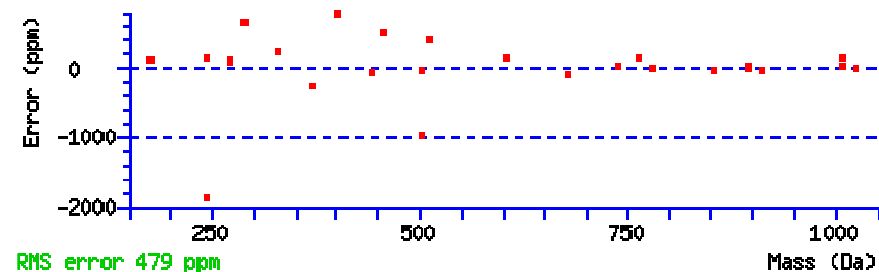

All matches to this query

| Score | Mr(calc):   | Delta    | Sequence                   |
|-------|-------------|----------|----------------------------|
| 55.5  | 1180.620026 | 2.005422 | <a href="#">ELGDHVTNLR</a> |
| 13.9  | 1180.627396 | 1.998052 | <a href="#">XMKTAENIR</a>  |
| 12.3  | 1180.610107 | 2.015341 | <a href="#">EAVHAWRER</a>  |
| 11.3  | 1181.622635 | 1.002813 | <a href="#">ENGMYGKRR</a>  |
| 11.2  | 1180.627396 | 1.998052 | <a href="#">EEKCLPPPR</a>  |
| 11.0  | 1181.623322 | 1.002126 | <a href="#">FYFPSLQPR</a>  |
| 10.8  | 1182.617874 | 0.007574 | <a href="#">MRERYSASK</a>  |
| 10.8  | 1180.612793 | 2.012655 | <a href="#">EIHATYYK</a>   |
| 10.7  | 1181.622635 | 1.002813 | <a href="#">MAKKNYDLR</a>  |



MS/MS Fragmentation of **ELTVSNNDINEAGVR**

Found in **IPI00550069.3**, Tax\_Id=9606 Gene\_Symbol=RNH1 Ribonuclease inhibitor

Match to Query 5464: 1657.836628 from(829.925590,2+)

Title: Elution from: 29.47 to 33.35 period: FD070412dMavril05.raw experiment: 1 cycles: 1 precIntensity: 79773.2 FinneganScanNumber: 1907

Data file D:\projecttemp\FD080412dM\FD070412dMavril05.msm

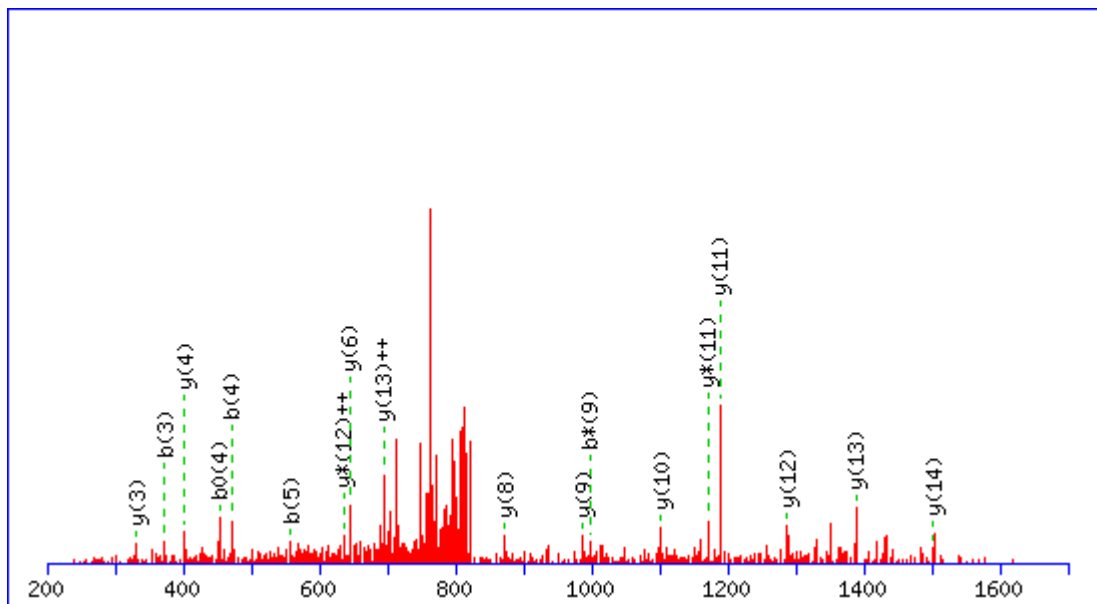

**Monoisotopic mass of neutral peptide Mr(calc):** 1657.827103

**Fixed modifications:** Carbamidomethyl (C)

**Variable modifications:**

**N-term :** Dimethyl (N-term)

**Ions Score:** 54 **Expect:** 0.0012

**Matches (Bold Red):** 18/150 fragment ions using 48 most intense peaks

| #  | b           | b <sup>++</sup> | b*          | b <sup>*++</sup> | b <sup>0</sup> | b <sup>0++</sup> | Seq. | y           | y <sup>++</sup> | y*          | y <sup>*++</sup> | y <sup>0</sup> | y <sup>0++</sup> | #  |
|----|-------------|-----------------|-------------|------------------|----------------|------------------|------|-------------|-----------------|-------------|------------------|----------------|------------------|----|
| 1  | 158.081165  | 79.544220       |             |                  | 140.070600     | 70.538938        | E    |             |                 |             |                  |                |                  | 15 |
| 2  | 271.165229  | 136.086253      |             |                  | 253.154664     | 127.080970       | L    | 1501.760510 | 751.383893      | 1484.733961 | 742.870618       | 1483.749945    | 742.378610       | 14 |
| 3  | 372.212908  | 186.610092      |             |                  | 354.202343     | 177.604810       | T    | 1388.676446 | 694.841861      | 1371.649897 | 686.328587       | 1370.665881    | 685.836578       | 13 |
| 4  | 471.281322  | 236.144299      |             |                  | 453.270757     | 227.139017       | V    | 1287.628767 | 644.318021      | 1270.602218 | 635.804747       | 1269.618202    | 635.312739       | 12 |
| 5  | 558.313350  | 279.660313      |             |                  | 540.302785     | 270.655031       | S    | 1188.560353 | 594.783814      | 1171.533804 | 586.270540       | 1170.549788    | 585.778532       | 11 |
| 6  | 672.356277  | 336.681777      | 655.329728  | 328.168502       | 654.345712     | 327.676494       | N    | 1101.528325 | 551.267801      | 1084.501776 | 542.754526       | 1083.517760    | 542.262518       | 10 |
| 7  | 786.399204  | 393.703240      | 769.372655  | 385.189966       | 768.388639     | 384.697958       | N    | 987.485398  | 494.246337      | 970.458849  | 485.733062       | 969.474833     | 485.241054       | 9  |
| 8  | 901.426147  | 451.216712      | 884.399598  | 442.703437       | 883.415582     | 442.211429       | D    | 873.442471  | 437.224874      | 856.415922  | 428.711599       | 855.431906     | 428.219591       | 8  |
| 9  | 1014.510211 | 507.758744      | 997.483662  | 499.245469       | 996.499646     | 498.753461       | I    | 758.415528  | 379.711402      | 741.388979  | 371.198127       | 740.404963     | 370.706119       | 7  |
| 10 | 1128.553138 | 564.780207      | 1111.526589 | 556.266933       | 1110.542573    | 555.774925       | N    | 645.331464  | 323.169370      | 628.304915  | 314.656095       | 627.320899     | 314.164087       | 6  |
| 11 | 1257.595731 | 629.301504      | 1240.569182 | 620.788229       | 1239.585166    | 620.296221       | E    | 531.288537  | 266.147906      | 514.261988  | 257.634632       | 513.277972     | 257.142624       | 5  |
| 12 | 1328.632845 | 664.820061      | 1311.606296 | 656.306786       | 1310.622280    | 655.814778       | A    | 402.245944  | 201.626610      | 385.219395  | 193.113335       |                |                  | 4  |
| 13 | 1385.654309 | 693.330793      | 1368.627760 | 684.817518       | 1367.643744    | 684.325510       | G    | 331.208830  | 166.108053      | 314.182281  | 157.594778       |                |                  | 3  |
| 14 | 1484.722723 | 742.865000      | 1467.696174 | 734.351725       | 1466.712158    | 733.859717       | V    | 274.187366  | 137.597321      | 257.160817  | 129.084046       |                |                  | 2  |
| 15 |             |                 |             |                  |                |                  | R    | 175.118952  | 88.063114       | 158.092403  | 79.549839        |                |                  | 1  |

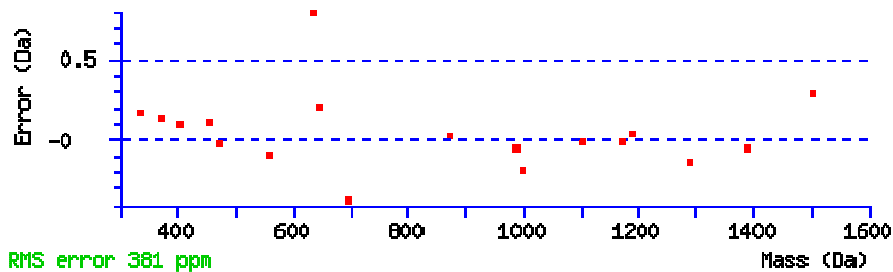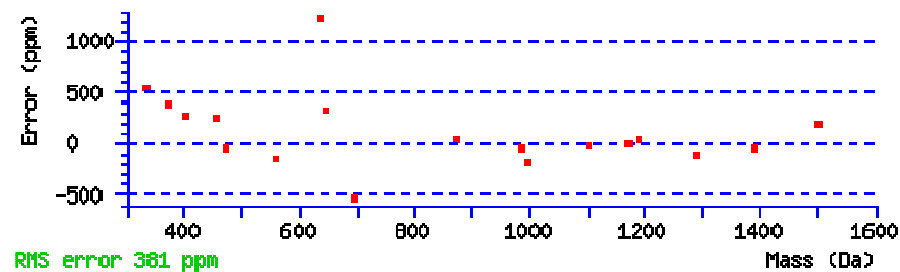

All matches to this query

| Score | Mr(calc):   | Delta     | Sequence                        |
|-------|-------------|-----------|---------------------------------|
| 54.5  | 1657.827103 | 0.009525  | <a href="#">ELTVSNNDINEAGVR</a> |
| 7.9   | 1657.831802 | 0.004826  | <a href="#">RNMRSQPLTSPESR</a>  |
| 4.9   | 1657.831818 | 0.004810  | <a href="#">QTNSRGNGKMTSPPR</a> |
| 4.0   | 1657.842361 | -0.005733 | <a href="#">HSEVKAADEDVFRK</a>  |

|     |             |          |                                   |
|-----|-------------|----------|-----------------------------------|
| 0.2 | 1657.834503 | 0.002125 | <a href="#">SPSSNGLSPSPGAGMLK</a> |
|-----|-------------|----------|-----------------------------------|

---



MS/MS Fragmentation of **EQVIAALR**

Found in **IPI00008223.3**, Tax\_Id=9606 Gene\_Symbol=RAD23B UV excision repair protein RAD23 homolog B

Match to Query 3304: 928.560936 from(465.287744,2+)

Title: Elution from: 28.12 to 32.00 period: FD070412dMavril04.raw experiment: 1 cycles: 1 precIntensity: 788800.2 FinneganScanNumber: 1854

Data file D:\projecttemp\FD080412dM\FD070412dMavril04.msm

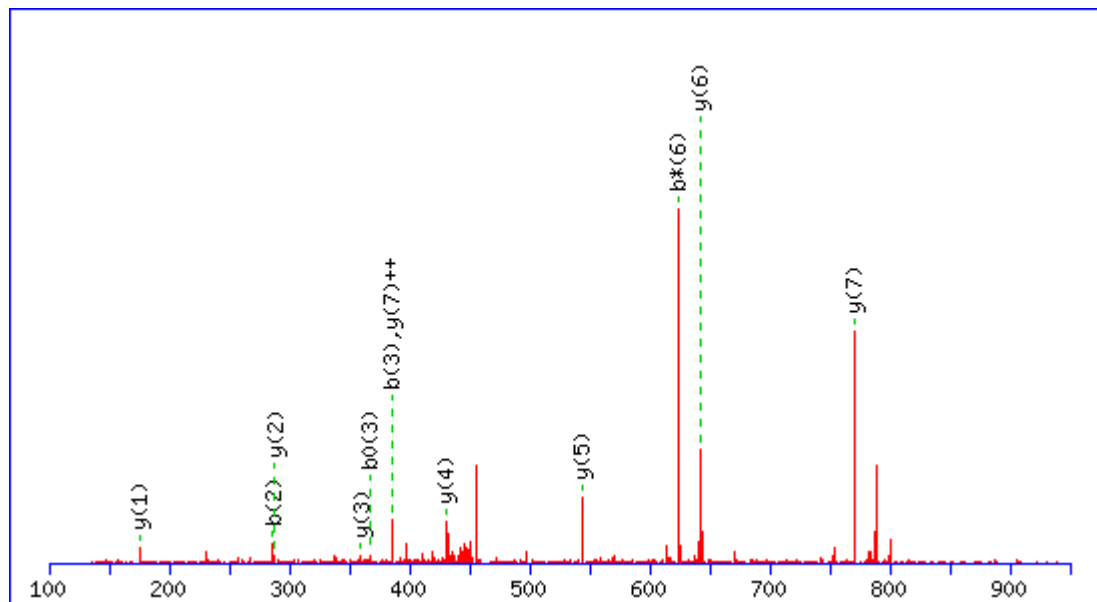

**Monoisotopic mass of neutral peptide Mr(calc):** 926.554886

**Fixed modifications:** Carbamidomethyl (C)

**Variable modifications:**

**N-term :** Dimethyl (N-term)

**Ions Score:** 43 **Expect:** 0.017

**Matches (Bold Red):** 12/68 fragment ions using 23 most intense peaks

| # | b                 | b <sup>++</sup> | b <sup>*</sup>    | b <sup>*++</sup> | b <sup>0</sup>    | b <sup>0++</sup> | Seq. | y                 | y <sup>++</sup>   | y <sup>*</sup> | y <sup>*++</sup> | # |
|---|-------------------|-----------------|-------------------|------------------|-------------------|------------------|------|-------------------|-------------------|----------------|------------------|---|
| 1 | 158.081165        | 79.544220       |                   |                  | 140.070600        | 70.538938        | E    |                   |                   |                |                  | 8 |
| 2 | <b>286.139743</b> | 143.573510      | 269.113194        | 135.060235       | 268.129178        | 134.568227       | Q    | <b>770.488300</b> | <b>385.747788</b> | 753.461751     | 377.234514       | 7 |
| 3 | <b>385.208157</b> | 193.107717      | 368.181608        | 184.594442       | <b>367.197592</b> | 184.102434       | V    | <b>642.429722</b> | 321.718499        | 625.403173     | 313.205225       | 6 |
| 4 | 498.292221        | 249.649749      | 481.265672        | 241.136474       | 480.281656        | 240.644466       | I    | <b>543.361308</b> | 272.184292        | 526.334759     | 263.671018       | 5 |
| 5 | 569.329335        | 285.168306      | 552.302786        | 276.655031       | 551.318770        | 276.163023       | A    | <b>430.277244</b> | 215.642260        | 413.250695     | 207.128985       | 4 |
| 6 | 640.366449        | 320.686863      | <b>623.339900</b> | 312.173588       | 622.355884        | 311.681580       | A    | <b>359.240130</b> | 180.123703        | 342.213581     | 171.610428       | 3 |
| 7 | 753.450513        | 377.228895      | 736.423964        | 368.715620       | 735.439948        | 368.223612       | L    | <b>288.203016</b> | 144.605146        | 271.176467     | 136.091871       | 2 |
| 8 |                   |                 |                   |                  |                   |                  | R    | <b>175.118952</b> | 88.063114         | 158.092403     | 79.549839        | 1 |

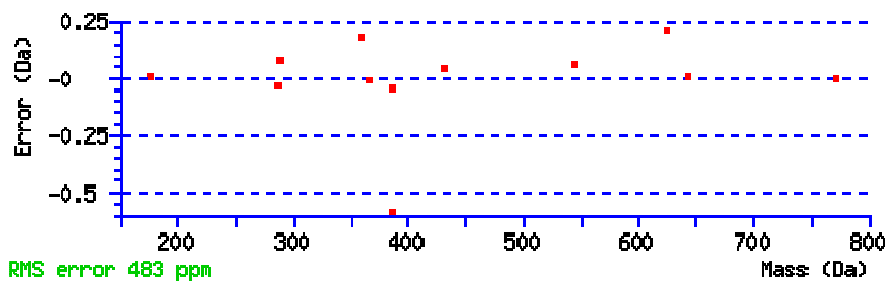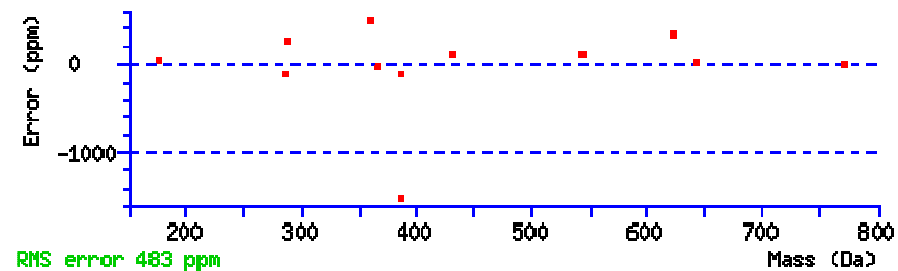

#### All matches to this query

| Score | Mr(calc):  | Delta    | Sequence                 |
|-------|------------|----------|--------------------------|
| 43.0  | 926.554886 | 2.006050 | <a href="#">EQVIAALR</a> |
| 24.9  | 926.554886 | 2.006050 | <a href="#">RESGIPIK</a> |
| 21.6  | 926.554871 | 2.006065 | <a href="#">EREKPLK</a>  |
| 17.9  | 928.559311 | 0.001625 | <a href="#">DQLASVLK</a> |
| 17.0  | 928.552780 | 0.008156 | <a href="#">MKALSPVR</a> |
| 15.0  | 926.559586 | 2.001350 | <a href="#">RRMAPIR</a>  |
| 14.4  | 928.559311 | 0.001625 | <a href="#">DSQLAVLK</a> |
| 14.1  | 926.548386 | 2.012550 | <a href="#">VXPVRLR</a>  |
| 13.7  | 926.559586 | 2.001350 | <a href="#">MRRAPLR</a>  |
| 13.7  | 926.554871 | 2.006065 | <a href="#">SRAEAPLK</a> |

MS/MS Fragmentation of **ESTLHLVLR**

Found in **IPI00179330.6**, Tax\_Id=9606 Gene\_Symbol=UBC;RPS27A;UBB ubiquitin and ribosomal protein S27a precursor

Match to Query 3875: 1094.648070 from(365.889966,3+)

Title: Elution from: 31.56 to 35.41 period: FD070412dMavril06.raw experiment: 1 cycles: 1 precIntensity: 4267810.0 FinneganScanNumber: 2057

Data file D:\projecttemp\FD080412dM\FD070412dMavril06.msm

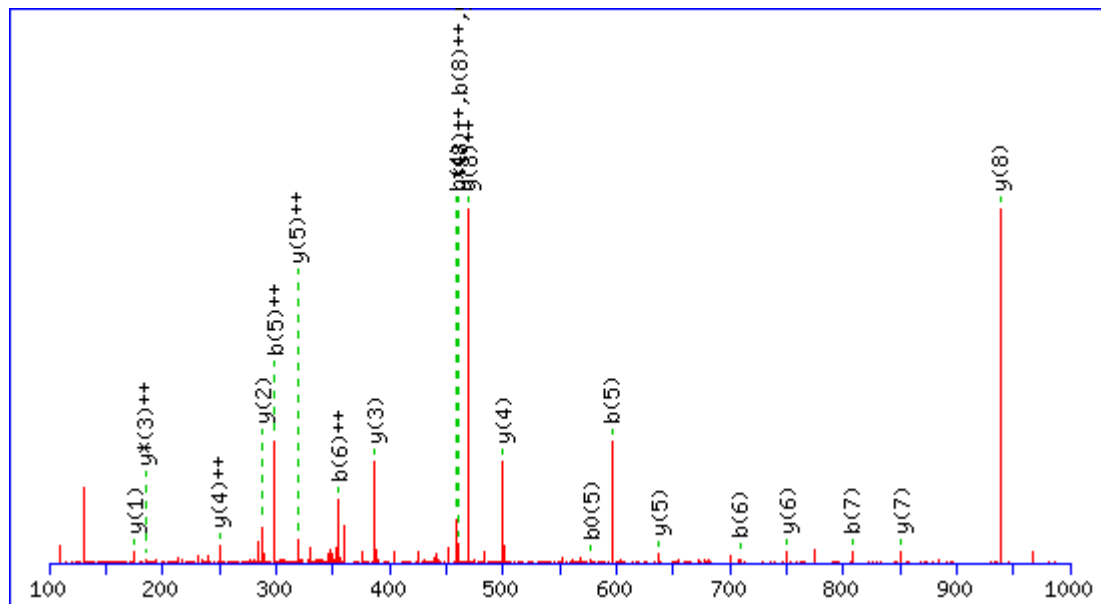

**Monoisotopic mass of neutral peptide Mr(calc):** 1094.644775

**Fixed modifications:** Carbamidomethyl (C)

**Variable modifications:**

**N-term :** Dimethyl (N-term)

**Ions Score:** 54 **Expect:** 0.0007

**Matches (Bold Red):** 22/68 fragment ions using 47 most intense peaks

| # | b          | b <sup>++</sup> | b <sup>0</sup> | b <sup>0++</sup> | Seq. | y          | y <sup>++</sup> | y <sup>*</sup> | y <sup>*++</sup> | y <sup>0</sup> | y <sup>0++</sup> | # |
|---|------------|-----------------|----------------|------------------|------|------------|-----------------|----------------|------------------|----------------|------------------|---|
| 1 | 158.081165 | 79.544220       | 140.070600     | 70.538938        | E    |            |                 |                |                  |                |                  | 9 |
| 2 | 245.113193 | 123.060234      | 227.102628     | 114.054952       | S    | 938.578177 | 469.792727      | 921.551628     | 461.279452       | 920.567612     | 460.787444       | 8 |
| 3 | 346.160872 | 173.584074      | 328.150307     | 164.578791       | T    | 851.546149 | 426.276713      | 834.519600     | 417.763438       | 833.535584     | 417.271430       | 7 |
| 4 | 459.244936 | 230.126106      | 441.234371     | 221.120824       | L    | 750.498470 | 375.752873      | 733.471921     | 367.239598       |                |                  | 6 |
| 5 | 596.303848 | 298.655562      | 578.293283     | 289.650280       | H    | 637.414406 | 319.210841      | 620.387857     | 310.697566       |                |                  | 5 |
| 6 | 709.387912 | 355.197594      | 691.377347     | 346.192312       | L    | 500.355494 | 250.681385      | 483.328945     | 242.168110       |                |                  | 4 |
| 7 | 808.456326 | 404.731801      | 790.445761     | 395.726518       | V    | 387.271430 | 194.139353      | 370.244881     | 185.626078       |                |                  | 3 |
| 8 | 921.540390 | 461.273833      | 903.529825     | 452.268551       | L    | 288.203016 | 144.605146      | 271.176467     | 136.091871       |                |                  | 2 |
| 9 |            |                 |                |                  | R    | 175.118952 | 88.063114       | 158.092403     | 79.549839        |                |                  | 1 |

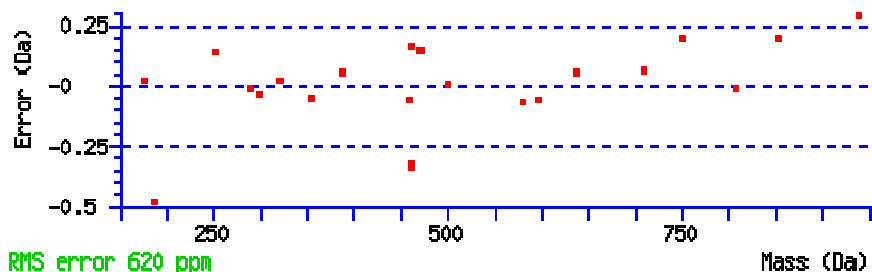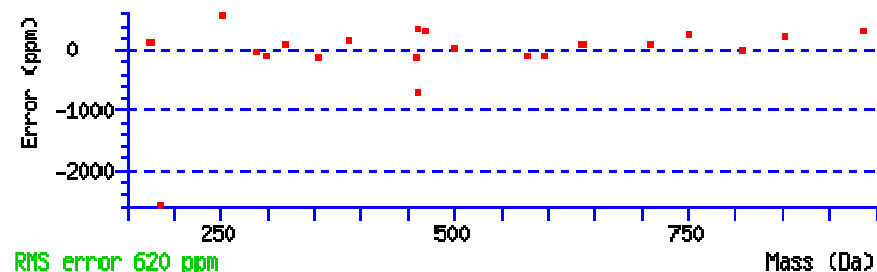

All matches to this query

| Score | Mr(calc):   | Delta     | Sequence                   |
|-------|-------------|-----------|----------------------------|
| 54.4  | 1094.644775 | 0.003295  | <a href="#">ESTLHLVLR</a>  |
| 10.5  | 1094.644760 | 0.003310  | <a href="#">TAPKPGEAIR</a> |
| 9.8   | 1093.649521 | 0.998549  | <a href="#">KKTISNTEFK</a> |
| 9.8   | 1093.649521 | 0.998549  | <a href="#">KKTISNTEFK</a> |
| 9.2   | 1094.638260 | 0.009810  | <a href="#">QVMHIVGKR</a>  |
| 9.0   | 1094.648773 | -0.000703 | <a href="#">KYQPYKIK</a>   |
| 9.0   | 1094.648773 | -0.000703 | <a href="#">KYQPYKIK</a>   |
| 8.8   | 1094.648788 | -0.000718 | <a href="#">NFPLPLPNK</a>  |
| 8.4   | 1094.652145 | -0.004075 | <a href="#">KYGSMVKAK</a>  |
| 8.4   | 1094.652145 | -0.004075 | <a href="#">KYGSMVKAK</a>  |



MS/MS Fragmentation of **ETDLLLDDSLVSIFGNR**

Found in **IPI00024915.2**, Tax\_Id=9606 Gene\_Symbol=PRDX5 Isoform Mitochondrial of Peroxiredoxin-5, mitochondrial

Match to Query 6540: 1933.983928 from(967.999240,2+)

Title: Elution from: 59.57 to 63.39 period: FD070412dMavril06.raw experiment: 1 cycles: 1 precIntensity: 144657.6 FinneganScanNumber: 4123

Data file D:\projecttemp\FD080412dM\FD070412dMavril06.msm

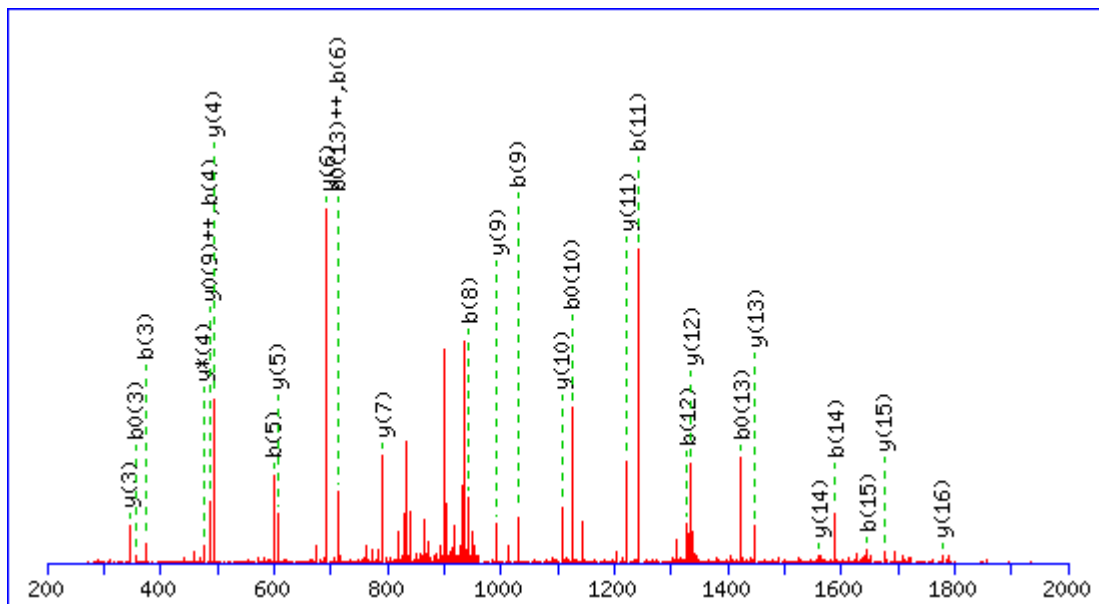

**Monoisotopic mass of neutral peptide Mr(calc):** 1933.999664

**Fixed modifications:** Carbamidomethyl (C)

**Variable modifications:**

**N-term :** Dimethyl (N-term)

**Ions Score:** 112 **Expect:** 2.9e-09

**Matches (Bold Red):** 29/152 fragment ions using 39 most intense peaks

| #  | b           | b <sup>++</sup> | b*          | b <sup>*++</sup> | b <sup>0</sup> | b <sup>0++</sup> | Seq. | y           | y <sup>++</sup> | y*          | y <sup>*++</sup> | y <sup>0</sup> | y <sup>0++</sup> | #  |
|----|-------------|-----------------|-------------|------------------|----------------|------------------|------|-------------|-----------------|-------------|------------------|----------------|------------------|----|
| 1  | 158.081165  | 79.544220       |             |                  | 140.070600     | 70.538938        | E    |             |                 |             |                  |                |                  | 17 |
| 2  | 259.128844  | 130.068060      |             |                  | 241.118279     | 121.062778       | T    | 1777.933055 | 889.470165      | 1760.906506 | 880.956891       | 1759.922490    | 880.464883       | 16 |
| 3  | 374.155787  | 187.581532      |             |                  | 356.145222     | 178.576249       | D    | 1676.885376 | 838.946326      | 1659.858827 | 830.433052       | 1658.874811    | 829.941043       | 15 |
| 4  | 487.239851  | 244.123564      |             |                  | 469.229286     | 235.118281       | L    | 1561.858433 | 781.432854      | 1544.831884 | 772.919580       | 1543.847868    | 772.427572       | 14 |
| 5  | 600.323915  | 300.665596      |             |                  | 582.313350     | 291.660313       | L    | 1448.774369 | 724.890822      | 1431.747820 | 716.377548       | 1430.763804    | 715.885540       | 13 |
| 6  | 713.407979  | 357.207628      |             |                  | 695.397414     | 348.202345       | L    | 1335.690305 | 668.348790      | 1318.663756 | 659.835516       | 1317.679740    | 659.343508       | 12 |
| 7  | 828.434922  | 414.721099      |             |                  | 810.424357     | 405.715817       | D    | 1222.606241 | 611.806758      | 1205.579692 | 603.293484       | 1204.595676    | 602.801476       | 11 |
| 8  | 943.461865  | 472.234571      |             |                  | 925.451300     | 463.229288       | D    | 1107.579298 | 554.293287      | 1090.552749 | 545.780012       | 1089.568733    | 545.288004       | 10 |
| 9  | 1030.493893 | 515.750585      |             |                  | 1012.483328    | 506.745302       | S    | 992.552355  | 496.779815      | 975.525806  | 488.266541       | 974.541790     | 487.774533       | 9  |
| 10 | 1143.577957 | 572.292617      |             |                  | 1125.567392    | 563.287334       | L    | 905.520327  | 453.263801      | 888.493778  | 444.750527       | 887.509762     | 444.258519       | 8  |
| 11 | 1242.646371 | 621.826824      |             |                  | 1224.635806    | 612.821541       | V    | 792.436263  | 396.721770      | 775.409714  | 388.208495       | 774.425698     | 387.716487       | 7  |
| 12 | 1329.678399 | 665.342838      |             |                  | 1311.667834    | 656.337555       | S    | 693.367849  | 347.187563      | 676.341300  | 338.674288       | 675.357284     | 338.182280       | 6  |
| 13 | 1442.762463 | 721.884870      |             |                  | 1424.751898    | 712.879587       | I    | 606.335821  | 303.671548      | 589.309272  | 295.158274       |                |                  | 5  |
| 14 | 1589.830877 | 795.419077      |             |                  | 1571.820312    | 786.413794       | F    | 493.251757  | 247.129516      | 476.225208  | 238.616242       |                |                  | 4  |
| 15 | 1646.852341 | 823.929809      |             |                  | 1628.841776    | 814.924526       | G    | 346.183343  | 173.595309      | 329.156794  | 165.082035       |                |                  | 3  |
| 16 | 1760.895268 | 880.951272      | 1743.868719 | 872.437998       | 1742.884703    | 871.945989       | N    | 289.161879  | 145.084577      | 272.135330  | 136.571303       |                |                  | 2  |
| 17 |             |                 |             |                  |                |                  | R    | 175.118952  | 88.063114       | 158.092403  | 79.549839        |                |                  | 1  |

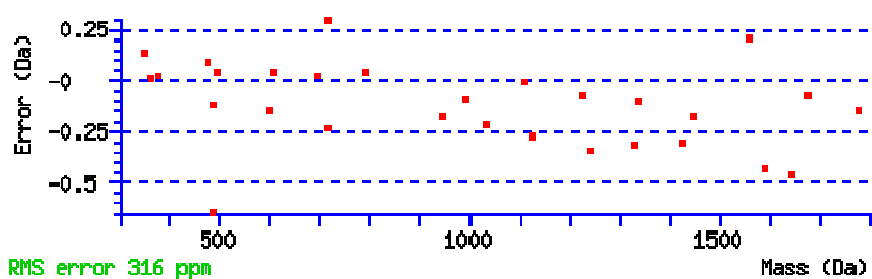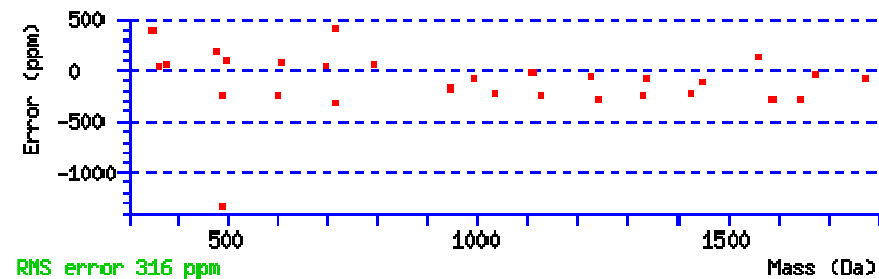

All matches to this query

| Score | Mr(calc):   | Delta     | Sequence                          |
|-------|-------------|-----------|-----------------------------------|
| 111.7 | 1933.999664 | -0.015736 | <a href="#">ETDLLLDDSLVSIFGNR</a> |
| 9.7   | 1932.994492 | 0.989436  | <a href="#">ASADHEAVEKFKFAK</a>   |

|     |             |           |                                    |
|-----|-------------|-----------|------------------------------------|
| 9.5 | 1932.990494 | 0.993434  | <a href="#">RAFLDLLSVTDDEGNR</a>   |
| 6.5 | 1933.985260 | -0.001332 | <a href="#">MMLATEETSPDLVGIKR</a>  |
| 4.2 | 1933.985260 | -0.001332 | <a href="#">MMLATEETSPDLVGIKR</a>  |
| 3.4 | 1932.997864 | 0.986064  | <a href="#">QVYKEDLPQLKEQCK</a>    |
| 3.3 | 1932.982620 | 1.001308  | <a href="#">QMASQAPAVNTLTESTLK</a> |
| 0.5 | 1933.978516 | 0.005412  | <a href="#">EIHVLDTDYEGYAILR</a>   |



MS/MS Fragmentation of **GATQQLDEAER**

Found in **IPI00297779.7**, Tax\_Id=9606 Gene\_Symbol=CCT2 T-complex protein 1 subunit beta

Match to Query 4715: 1357.690228 from(679.852390,2+)

Title: Elution from: 28.31 to 32.29 period: FD070412dMavril04.raw experiment: 1 cycles: 1 precIntensity: 1901470.4 FinneganScanNumber: 1872

Data file D:\projecttemp\FD080412dM\FD070412dMavril04.msm

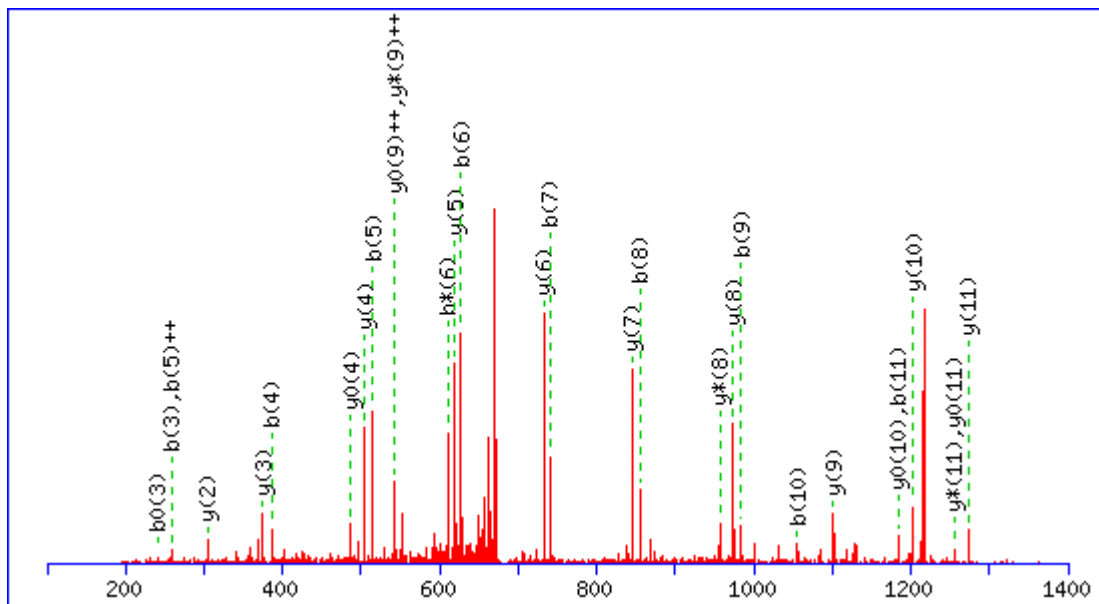

**Monoisotopic mass of neutral peptide Mr(calc):** 1357.683731

**Fixed modifications:** Carbamidomethyl (C)

**Variable modifications:**

**N-term :** Dimethyl (N-term)

**Ions Score:** 67 **Expect:** 6.2e-05

**Matches (Bold Red):** 29/120 fragment ions using 52 most intense peaks

| #  | b           | b <sup>++</sup> | b*          | b <sup>*++</sup> | b <sup>0</sup> | b <sup>0++</sup> | Seq. | y           | y <sup>++</sup> | y*          | y <sup>*++</sup> | y <sup>0</sup> | y <sup>0++</sup> | #  |
|----|-------------|-----------------|-------------|------------------|----------------|------------------|------|-------------|-----------------|-------------|------------------|----------------|------------------|----|
| 1  | 86.060036   | 43.533656       |             |                  |                |                  | G    |             |                 |             |                  |                |                  | 12 |
| 2  | 157.097150  | 79.052213       |             |                  |                |                  | A    | 1273.638272 | 637.322774      | 1256.611723 | 628.809500       | 1255.627707    | 628.317492       | 11 |
| 3  | 258.144829  | 129.576053      |             |                  | 240.134264     | 120.570770       | T    | 1202.601158 | 601.804217      | 1185.574609 | 593.290943       | 1184.590593    | 592.798935       | 10 |
| 4  | 386.203407  | 193.605342      | 369.176858  | 185.092067       | 368.192842     | 184.600059       | Q    | 1101.553479 | 551.280378      | 1084.526930 | 542.767103       | 1083.542914    | 542.275095       | 9  |
| 5  | 514.261985  | 257.634631      | 497.235436  | 249.121356       | 496.251420     | 248.629348       | Q    | 973.494901  | 487.251089      | 956.468352  | 478.737814       | 955.484336     | 478.245806       | 8  |
| 6  | 627.346049  | 314.176663      | 610.319500  | 305.663388       | 609.335484     | 305.171380       | I    | 845.436323  | 423.221800      | 828.409774  | 414.708525       | 827.425758     | 414.216517       | 7  |
| 7  | 740.430113  | 370.718695      | 723.403564  | 362.205420       | 722.419548     | 361.713412       | L    | 732.352259  | 366.679768      | 715.325710  | 358.166493       | 714.341694     | 357.674485       | 6  |
| 8  | 855.457056  | 428.232166      | 838.430507  | 419.718892       | 837.446491     | 419.226884       | D    | 619.268195  | 310.137736      | 602.241646  | 301.624461       | 601.257630     | 301.132453       | 5  |
| 9  | 984.499649  | 492.753463      | 967.473100  | 484.240188       | 966.489084     | 483.748180       | E    | 504.241252  | 252.624264      | 487.214703  | 244.110990       | 486.230687     | 243.618982       | 4  |
| 10 | 1055.536763 | 528.272020      | 1038.510214 | 519.758745       | 1037.526198    | 519.266737       | A    | 375.198659  | 188.102968      | 358.172110  | 179.589693       | 357.188094     | 179.097685       | 3  |
| 11 | 1184.579356 | 592.793316      | 1167.552807 | 584.280042       | 1166.568791    | 583.788034       | E    | 304.161545  | 152.584411      | 287.134996  | 144.071136       | 286.150980     | 143.579128       | 2  |
| 12 |             |                 |             |                  |                |                  | R    | 175.118952  | 88.063114       | 158.092403  | 79.549839        |                |                  | 1  |

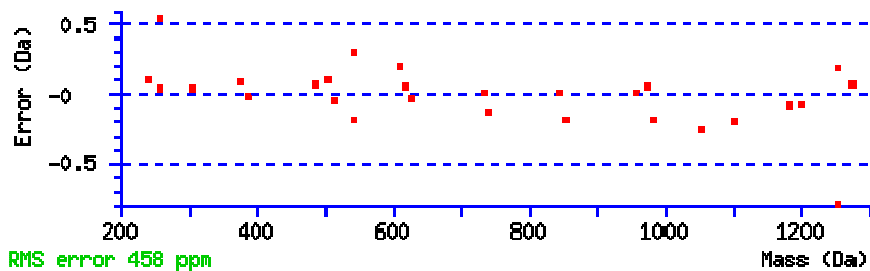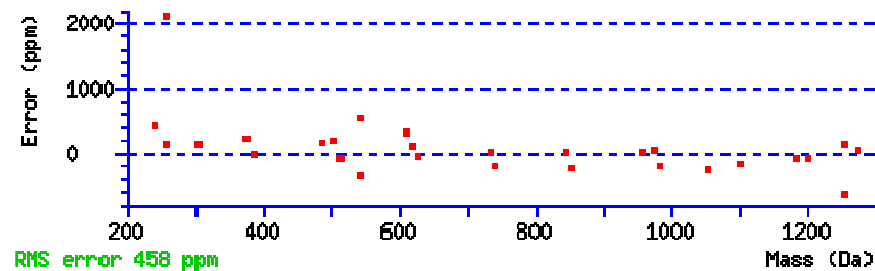

#### All matches to this query

| Score | Mr(calc):   | Delta     | Sequence                       |
|-------|-------------|-----------|--------------------------------|
| 66.6  | 1357.683731 | 0.006497  | <a href="#">GATQOILDEAER</a>   |
| 15.7  | 1356.699738 | 0.990490  | <a href="#">QQOGAILEVDTR</a>   |
| 12.0  | 1357.683746 | 0.006482  | <a href="#">QELSGSGQASGPGK</a> |
| 11.5  | 1357.694946 | -0.004718 | <a href="#">VEEQREQEKR</a>     |
| 9.6   | 1357.683716 | 0.006512  | <a href="#">EKQQAIEIQEK</a>    |
| 9.6   | 1357.694946 | -0.004718 | <a href="#">EQOKEQREQK</a>     |
| 9.3   | 1357.683716 | 0.006512  | <a href="#">DLOEQQREEK</a>     |

|     |             |           |                             |
|-----|-------------|-----------|-----------------------------|
| 8.4 | 1357.684601 | 0.005627  | <a href="#">LNMLHPMSQKK</a> |
| 7.5 | 1357.694946 | -0.004718 | <a href="#">EQOKEOREQK</a>  |
| 6.6 | 1357.683701 | 0.006527  | <a href="#">AANEETKNKPK</a> |

---

MS/MS Fragmentation of **GAVEKGEELSCEER**

Found in **IPI00013890.2**, Tax\_Id=9606 Gene\_Symbol=SFN Isoform 1 of 14-3-3 protein sigma

Match to Query 5557: 1648.784496 from(825.399524,2+)

Title: Elution from: 18.25 to 22.22 period: FD070412dMavril07.raw experiment: 1 cycles: 1 precIntensity: 150997.3 FinneganScanNumber: 1162

Data file D:\projectemp\FD080412dM\FD070412dMavril07.msm

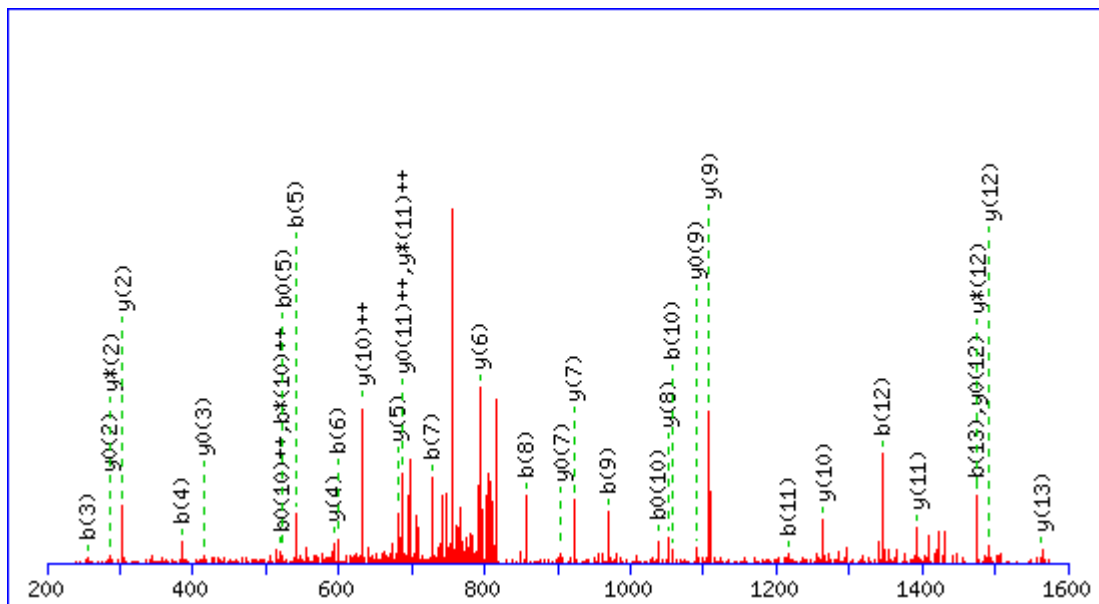

**Monoisotopic mass of neutral peptide Mr(calc):** 1647.777359

**Fixed modifications:** Carbamidomethyl (C)

**Variable modifications:**

**N-term :** Dimethyl (N-term)

**K5 :** Dimethyl (K)

**Ions Score:** 63 **Expect:** 0.00012

**Matches (Bold Red):** 36/140 fragment ions using 73 most intense peaks

| #  | b           | b <sup>++</sup> | b*          | b <sup>*++</sup> | b <sup>0</sup> | b <sup>0++</sup> | Seq. | y           | y <sup>++</sup> | y*          | y <sup>*++</sup> | y <sup>0</sup> | y <sup>0++</sup> | #  |
|----|-------------|-----------------|-------------|------------------|----------------|------------------|------|-------------|-----------------|-------------|------------------|----------------|------------------|----|
| 1  | 86.060036   | 43.533656       |             |                  |                |                  | G    |             |                 |             |                  |                |                  | 14 |
| 2  | 157.097150  | 79.052213       |             |                  |                |                  | A    | 1563.731909 | 782.369593      | 1546.705360 | 773.856318       | 1545.721344    | 773.364310       | 13 |
| 3  | 256.165564  | 128.586420      |             |                  |                |                  | V    | 1492.694795 | 746.851036      | 1475.668246 | 738.337761       | 1474.684230    | 737.845753       | 12 |
| 4  | 385.208157  | 193.107717      |             |                  | 367.197592     | 184.102434       | E    | 1393.626381 | 697.316829      | 1376.599832 | 688.803554       | 1375.615816    | 688.311546       | 11 |
| 5  | 541.334416  | 271.170846      | 524.307867  | 262.657572       | 523.323851     | 262.165564       | K    | 1264.583788 | 632.795532      | 1247.557239 | 624.282258       | 1246.573223    | 623.790250       | 10 |
| 6  | 598.355880  | 299.681578      | 581.329331  | 291.168304       | 580.345315     | 290.676296       | G    | 1108.457529 | 554.732403      | 1091.430980 | 546.219128       | 1090.446964    | 545.727120       | 9  |
| 7  | 727.398473  | 364.202875      | 710.371924  | 355.689600       | 709.387908     | 355.197592       | E    | 1051.436065 | 526.221671      | 1034.409516 | 517.708396       | 1033.425500    | 517.216388       | 8  |
| 8  | 856.441066  | 428.724171      | 839.414517  | 420.210897       | 838.430501     | 419.718889       | E    | 922.393472  | 461.700374      | 905.366923  | 453.187100       | 904.382907     | 452.695092       | 7  |
| 9  | 969.525130  | 485.266203      | 952.498581  | 476.752929       | 951.514565     | 476.260921       | L    | 793.350879  | 397.179078      | 776.324330  | 388.665803       | 775.340314     | 388.173795       | 6  |
| 10 | 1056.557158 | 528.782217      | 1039.530609 | 520.268943       | 1038.546593    | 519.776935       | S    | 680.266815  | 340.637046      | 663.240266  | 332.123771       | 662.256250     | 331.631763       | 5  |
| 11 | 1216.587807 | 608.797542      | 1199.561258 | 600.284267       | 1198.577242    | 599.792259       | C    | 593.234787  | 297.121032      | 576.208238  | 288.607757       | 575.224222     | 288.115749       | 4  |
| 12 | 1345.630400 | 673.318838      | 1328.603851 | 664.805564       | 1327.619835    | 664.313556       | E    | 433.204138  | 217.105707      | 416.177589  | 208.592432       | 415.193573     | 208.100424       | 3  |
| 13 | 1474.672993 | 737.840135      | 1457.646444 | 729.326860       | 1456.662428    | 728.834852       | E    | 304.161545  | 152.584411      | 287.134996  | 144.071136       | 286.150980     | 143.579128       | 2  |
| 14 |             |                 |             |                  |                |                  | R    | 175.118952  | 88.063114       | 158.092403  | 79.549839        |                |                  | 1  |

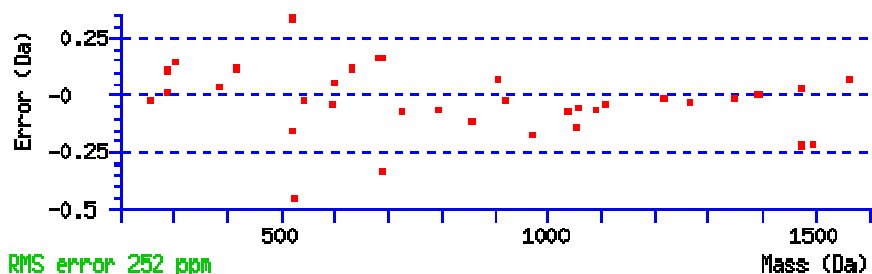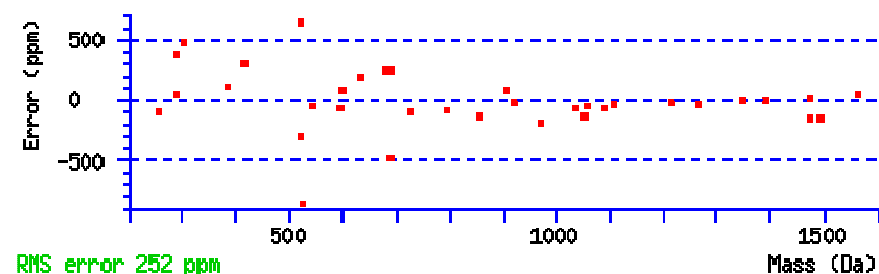

All matches to this query

| Score | Mr(calc):   | Delta    | Sequence                         |
|-------|-------------|----------|----------------------------------|
| 62.6  | 1647.777359 | 1.007137 | <a href="#">GAVEKGEELSCEER</a>   |
| 4.6   | 1646.780319 | 2.004177 | <a href="#">SCHKMCIDIQRR</a>     |
| 3.9   | 1647.766113 | 1.018383 | <a href="#">MKNEIDNDPESEK</a>    |
| 3.3   | 1647.795135 | 0.989361 | <a href="#">DTSANVKSAGEGEVEK</a> |
| 3.2   | 1647.772186 | 1.012310 | <a href="#">MARSCWGPATRAER</a>   |

|     |             |           |                                 |
|-----|-------------|-----------|---------------------------------|
| 2.9 | 1646.786850 | 1.997646  | <a href="#">HMMKEVLSTGQGNR</a>  |
| 1.8 | 1647.778015 | 1.006481  | <a href="#">RYYDEVEAEGYVK</a>   |
| 1.7 | 1648.798660 | -0.014164 | <a href="#">MEACMLNGTVIGPGK</a> |
| 1.6 | 1647.785416 | 0.999080  | <a href="#">KMGTFFSYPPEEK</a>   |
| 1.5 | 1647.774872 | 1.009624  | <a href="#">LYKCSECEKTFR</a>    |

MS/MS Fragmentation of **GAWSNVLR**

Found in **IPI00007188.5**, Tax\_Id=9606 Gene\_Symbol=SLC25A5 ADP/ATP translocase 2

Match to Query 3009: 929.507956 from(465.761254,2+)

Title: Elution from: 31.80 to 35.53 period: FD070412dMavril07.raw experiment: 1 cycles: 1 precIntensity: 1750525.6 FinneganScanNumber: 2269

Data file D:\projecttemp\FD080412dM\FD070412dMavril07.msm

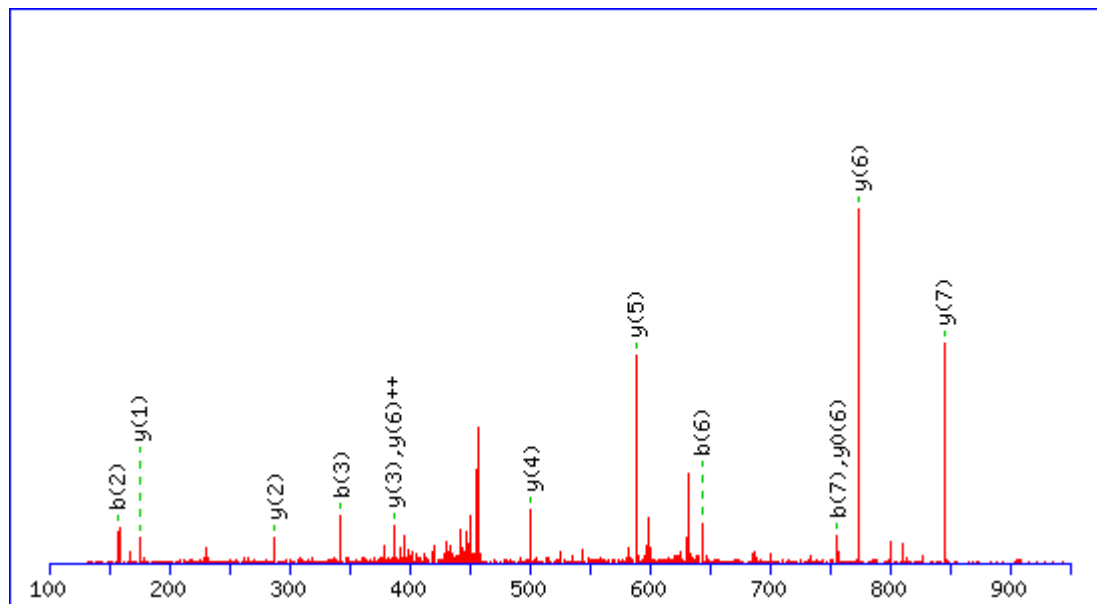

**Monoisotopic mass of neutral peptide Mr(calc):** 929.508286

**Fixed modifications:** Carbamidomethyl (C)

**Variable modifications:**

**N-term :** Dimethyl (N-term)

**Ions Score:** 46 **Expect:** 0.0087

**Matches (Bold Red):** 13/62 fragment ions using 28 most intense peaks

| # | b                 | b <sup>++</sup> | b <sup>*</sup> | b <sup>*++</sup> | b <sup>0</sup> | b <sup>0++</sup> | Seq. | y                 | y <sup>++</sup>   | y <sup>*</sup> | y <sup>*++</sup> | y <sup>0</sup>    | y <sup>0++</sup> | # |
|---|-------------------|-----------------|----------------|------------------|----------------|------------------|------|-------------------|-------------------|----------------|------------------|-------------------|------------------|---|
| 1 | 86.060036         | 43.533656       |                |                  |                |                  | G    |                   |                   |                |                  |                   |                  | 8 |
| 2 | <b>157.097150</b> | 79.052213       |                |                  |                |                  | A    | <b>845.462812</b> | 423.235044        | 828.436263     | 414.721770       | 827.452247        | 414.229762       | 7 |
| 3 | <b>343.176463</b> | 172.091870      |                |                  |                |                  | W    | <b>774.425698</b> | <b>387.716487</b> | 757.399149     | 379.203213       | <b>756.415133</b> | 378.711205       | 6 |
| 4 | 430.208491        | 215.607884      |                |                  | 412.197926     | 206.602601       | S    | <b>588.346385</b> | 294.676831        | 571.319836     | 286.163556       | 570.335820        | 285.671548       | 5 |
| 5 | 544.251418        | 272.629347      | 527.224869     | 264.116073       | 526.240853     | 263.624065       | N    | <b>501.314357</b> | 251.160816        | 484.287808     | 242.647542       |                   |                  | 4 |
| 6 | <b>643.319832</b> | 322.163554      | 626.293283     | 313.650280       | 625.309267     | 313.158272       | V    | <b>387.271430</b> | 194.139353        | 370.244881     | 185.626079       |                   |                  | 3 |
| 7 | <b>756.403896</b> | 378.705586      | 739.377347     | 370.192312       | 738.393331     | 369.700304       | L    | <b>288.203016</b> | 144.605146        | 271.176467     | 136.091872       |                   |                  | 2 |
| 8 |                   |                 |                |                  |                |                  | R    | <b>175.118952</b> | 88.063114         | 158.092403     | 79.549840        |                   |                  | 1 |

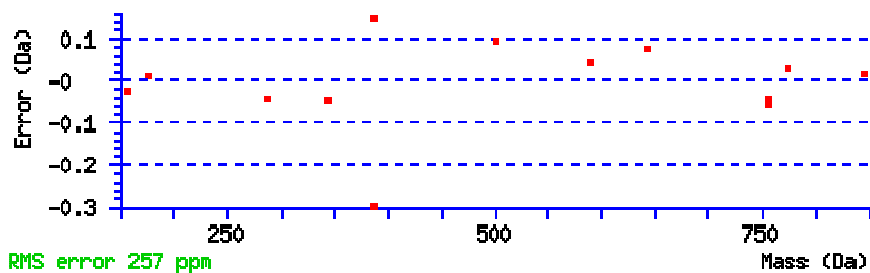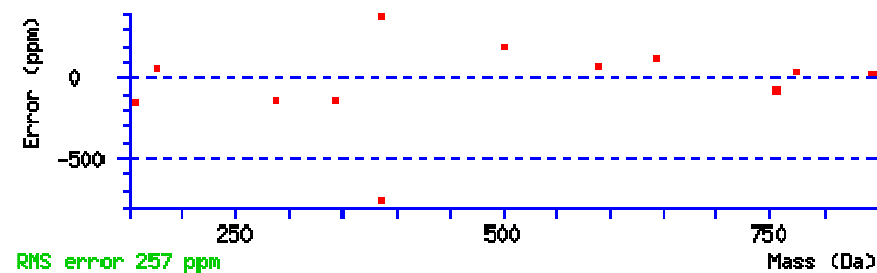

#### All matches to this query

| Score | Mr(calc):  | Delta     | Sequence                   |
|-------|------------|-----------|----------------------------|
| 45.5  | 929.508286 | -0.000330 | <a href="#">GAWSNVLR</a>   |
| 21.1  | 929.511642 | -0.003686 | <a href="#">QCALAALR</a>   |
| 20.0  | 929.511642 | -0.003686 | <a href="#">KGECPRK</a>    |
| 19.2  | 929.515488 | -0.007532 | <a href="#">RSDAAVRR</a>   |
| 16.6  | 929.511642 | -0.003686 | <a href="#">KGECPRK</a>    |
| 15.9  | 929.504257 | 0.003699  | <a href="#">RASDNLVR</a>   |
| 15.1  | 929.504272 | 0.003684  | <a href="#">RAAPTXXGTR</a> |
| 13.5  | 929.515488 | -0.007532 | <a href="#">ERGLRGSR</a>   |
| 12.7  | 929.515488 | -0.007532 | <a href="#">SAPSTRRR</a>   |
| 12.7  | 929.515671 | -0.007715 | <a href="#">KWMGPQK</a>    |



MS/MS Fragmentation of **GKQGPIKEEPPMK**

Found in **IPI00640533.2**, Tax\_Id=9606 Gene\_Symbol=HYDIN;HYDIN2 Putative uncharacterized protein HYDIN

Match to Query 6250: 1495.833317 from(1496.840593,1+)

Title: Elution from: 94.59 to 98.50 period: FD070412dMavril01.raw experiment: 1 cycles: 1 precIntensity: 1137614.7 FinneganScanNumber: 6056

Data file D:\projecttemp\FD080412dM\FD070412dMavril01.msm

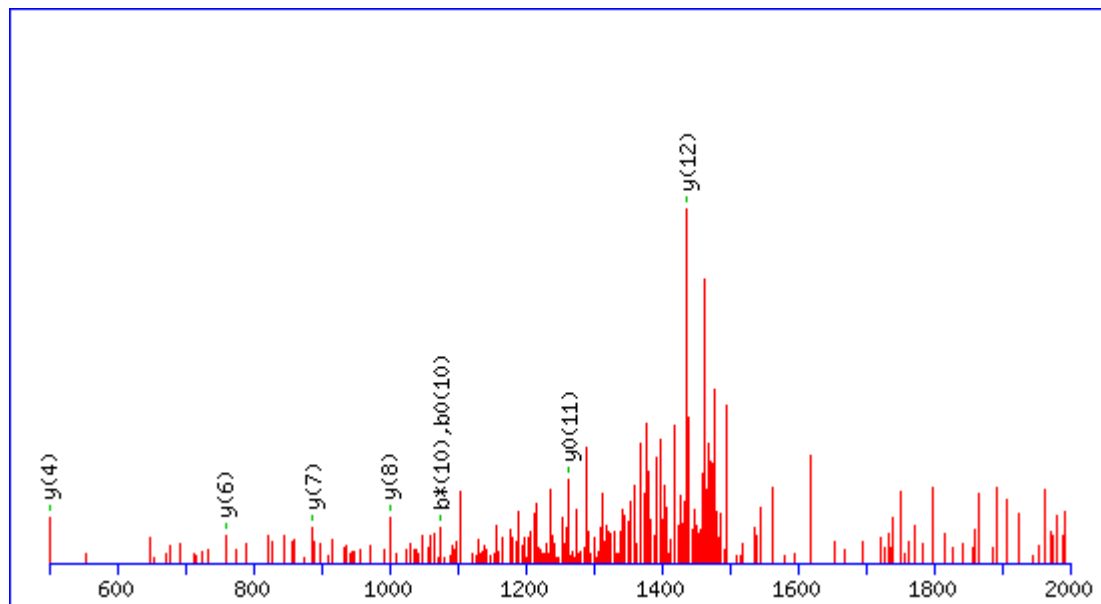

**Monoisotopic mass of neutral peptide Mr(calc):** 1493.827545

**Fixed modifications:** Carbamidomethyl (C)

**Variable modifications:**

**K2** : Dimethyl (K)

**K13** : Dimethyl (K)

**Ions Score:** 21 **Expect:** 2.3

**Matches (Bold Red):** 8/60 fragment ions using 13 most intense peaks

| #  | b           | b*          | b <sup>0</sup> | Seq. | y           | y*          | y <sup>0</sup> | #  |
|----|-------------|-------------|----------------|------|-------------|-------------|----------------|----|
| 1  | 58.028740   |             |                | G    |             |             |                | 13 |
| 2  | 214.154999  | 197.128450  |                | K    | 1437.813391 | 1420.786842 | 1419.802826    | 12 |
| 3  | 342.213577  | 325.187028  |                | Q    | 1281.687132 | 1264.660583 | 1263.676567    | 11 |
| 4  | 399.235041  | 382.208492  |                | G    | 1153.628554 | 1136.602005 | 1135.617989    | 10 |
| 5  | 496.287805  | 479.261256  |                | P    | 1096.607090 | 1079.580541 | 1078.596525    | 9  |
| 6  | 609.371869  | 592.345320  |                | I    | 999.554326  | 982.527777  | 981.543761     | 8  |
| 7  | 737.466832  | 720.440283  |                | K    | 886.470262  | 869.443713  | 868.459697     | 7  |
| 8  | 866.509425  | 849.482876  | 848.498860     | E    | 758.375299  | 741.348750  | 740.364734     | 6  |
| 9  | 995.552018  | 978.525469  | 977.541453     | E    | 629.332706  | 612.306157  | 611.322141     | 5  |
| 10 | 1092.604782 | 1075.578233 | 1074.594217    | P    | 500.290113  | 483.263564  |                | 4  |
| 11 | 1189.657546 | 1172.630997 | 1171.646981    | P    | 403.237349  | 386.210800  |                | 3  |
| 12 | 1320.698031 | 1303.671482 | 1302.687466    | M    | 306.184585  | 289.158036  |                | 2  |
| 13 |             |             |                | K    | 175.144100  | 158.117551  |                | 1  |

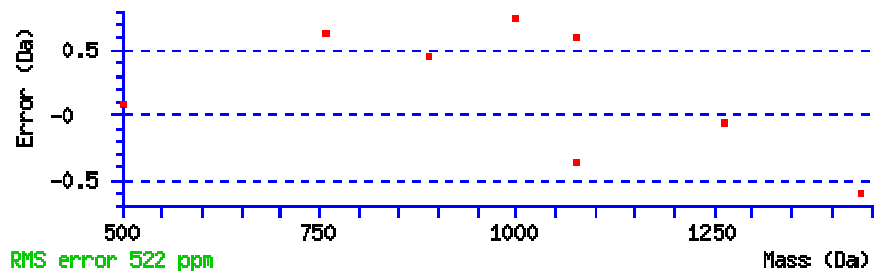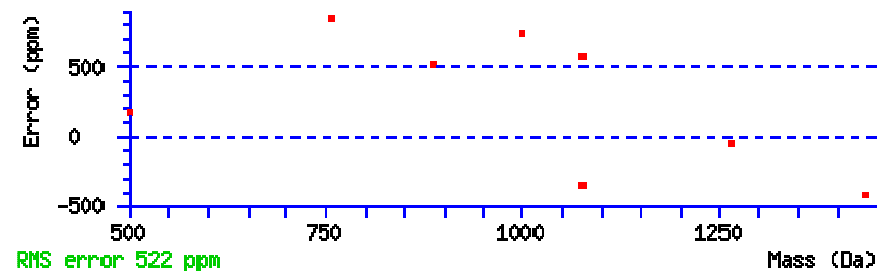

All matches to this query

| Score | Mr(calc):   | Delta    | Sequence                      |
|-------|-------------|----------|-------------------------------|
| 21.4  | 1493.827545 | 2.005772 | <a href="#">GKQGPIKEEPPMK</a> |
| 5.8   | 1493.827545 | 2.005772 | <a href="#">GKQGPIKEEPPMK</a> |

MS/MS Fragmentation of **GLCAIAQAESLR**

Found in **IPI00011253.3**, Tax\_Id=9606 Gene\_Symbol=RPS3 40S ribosomal protein S3

Match to Query 4434: 1315.693586 from(658.854069,2+)

Title: Elution from: 34.65 to 38.60 period: FD070412dMavril07.raw experiment: 1 cycles: 1 precIntensity: 935746.0 FinneganScanNumber: 2508

Data file D:\projecttemp\FD080412dM\FD070412dMavril07.msm

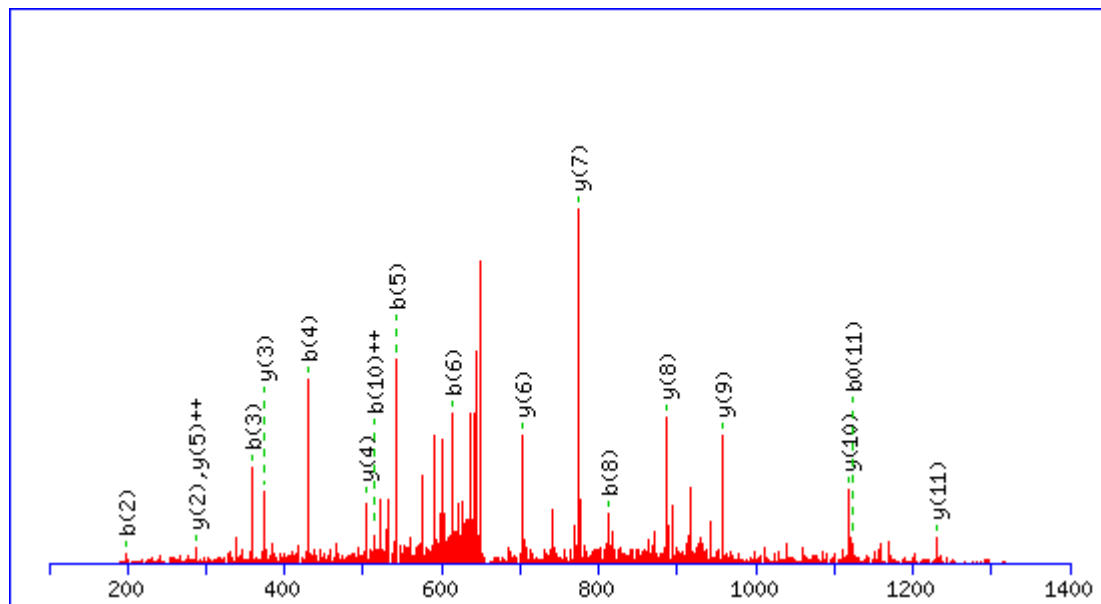

**Monoisotopic mass of neutral peptide Mr(calc):** 1315.691788

**Fixed modifications:** Carbamidomethyl (C)

**Variable modifications:**

**N-term :** Dimethyl (N-term)

**Ions Score:** 52 **Expect:** 0.0023

**Matches (Bold Red):** 18/100 fragment ions using 42 most intense peaks

| #  | b                 | b <sup>++</sup>   | b*          | b <sup>*++</sup> | b <sup>0</sup>     | b <sup>0++</sup> | Seq. | y                  | y <sup>++</sup>   | y*          | y <sup>*++</sup> | y <sup>0</sup> | y <sup>0++</sup> | #  |
|----|-------------------|-------------------|-------------|------------------|--------------------|------------------|------|--------------------|-------------------|-------------|------------------|----------------|------------------|----|
| 1  | 86.060036         | 43.533656         |             |                  |                    |                  | G    |                    |                   |             |                  |                |                  | 12 |
| 2  | <b>199.144100</b> | 100.075688        |             |                  |                    |                  | L    | <b>1231.646334</b> | 616.326805        | 1214.619785 | 607.813531       | 1213.635769    | 607.321523       | 11 |
| 3  | <b>359.174749</b> | 180.091012        |             |                  |                    |                  | C    | <b>1118.562270</b> | 559.784773        | 1101.535721 | 551.271499       | 1100.551705    | 550.779490       | 10 |
| 4  | <b>430.211863</b> | 215.609569        |             |                  |                    |                  | A    | <b>958.531621</b>  | 479.769449        | 941.505072  | 471.256174       | 940.521056     | 470.764166       | 9  |
| 5  | <b>543.295927</b> | 272.151602        |             |                  |                    |                  | I    | <b>887.494507</b>  | 444.250892        | 870.467958  | 435.737617       | 869.483942     | 435.245609       | 8  |
| 6  | <b>614.333041</b> | 307.670159        |             |                  |                    |                  | A    | <b>774.410443</b>  | 387.708860        | 757.383894  | 379.195585       | 756.399878     | 378.703577       | 7  |
| 7  | 742.391619        | 371.699448        | 725.365070  | 363.186173       |                    |                  | Q    | <b>703.373329</b>  | 352.190303        | 686.346780  | 343.677028       | 685.362764     | 343.185020       | 6  |
| 8  | <b>813.428733</b> | 407.218005        | 796.402184  | 398.704730       |                    |                  | A    | 575.314751         | <b>288.161014</b> | 558.288202  | 279.647739       | 557.304186     | 279.155731       | 5  |
| 9  | 942.471326        | 471.739301        | 925.444777  | 463.226026       | 924.460761         | 462.734018       | E    | <b>504.277637</b>  | 252.642456        | 487.251088  | 244.129182       | 486.267072     | 243.637174       | 4  |
| 10 | 1029.503354       | <b>515.255315</b> | 1012.476805 | 506.742040       | 1011.492789        | 506.250032       | S    | <b>375.235044</b>  | 188.121160        | 358.208495  | 179.607885       | 357.224479     | 179.115877       | 3  |
| 11 | 1142.587418       | 571.797347        | 1125.560869 | 563.284073       | <b>1124.576853</b> | 562.792065       | L    | <b>288.203016</b>  | 144.605146        | 271.176467  | 136.091871       |                |                  | 2  |
| 12 |                   |                   |             |                  |                    |                  | R    | 175.118952         | 88.063114         | 158.092403  | 79.549839        |                |                  | 1  |

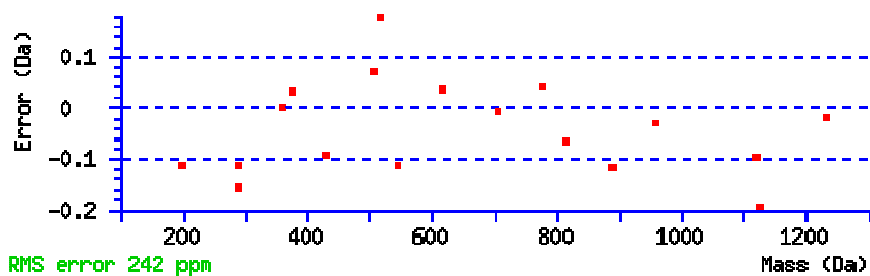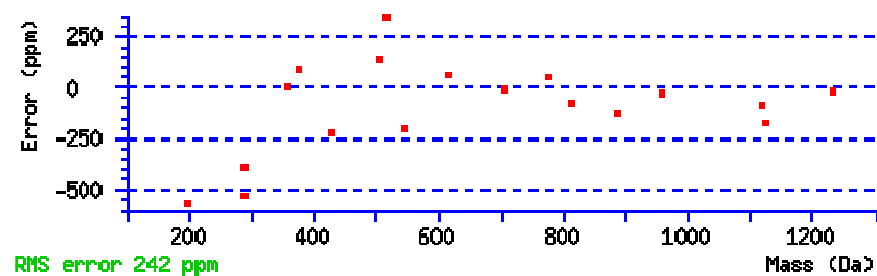

All matches to this query

| Score | Mr(calc):   | Delta     | Sequence                     |
|-------|-------------|-----------|------------------------------|
| 52.4  | 1315.691788 | 0.001798  | <a href="#">GLCAIAQAESLR</a> |
| 13.2  | 1315.691772 | 0.001814  | <a href="#">EMNNLQLALAR</a>  |
| 10.8  | 1314.677887 | 1.015699  | <a href="#">SAQAEELALR</a>   |
| 10.4  | 1314.685333 | 1.008253  | <a href="#">SGDAIVDMVPGK</a> |
| 8.9   | 1315.698303 | -0.004717 | <a href="#">ETGAPSKEGKEK</a> |
| 8.9   | 1315.698303 | -0.004717 | <a href="#">ETGAPSKEGKEK</a> |
| 8.9   | 1315.698303 | -0.004717 | <a href="#">ETGAPSKEGKEK</a> |

|     |             |           |                              |
|-----|-------------|-----------|------------------------------|
| 7.9 | 1315.688431 | 0.005155  | <a href="#">TADWKTRADPK</a>  |
| 6.3 | 1315.699173 | -0.005587 | <a href="#">KMLPMLESPSR</a>  |
| 5.8 | 1313.693909 | 1.999677  | <a href="#">EGALVELQTNGR</a> |

MS/MS Fragmentation of **GLVLDHGAR**

Found in **IPI00027626.3**, Tax\_Id=9606 Gene\_Symbol=CCT6A T-complex protein 1 subunit zeta

Match to Query 3458: 964.544682 from(483.279617,2+)

Title: Elution from: 19.46 to 23.27 period: FD070412dMavril04.raw experiment: 1 cycles: 1 precIntensity: 212317.7 FinneganScanNumber: 1187

Data file D:\projecttemp\FD080412dM\FD070412dMavril04.msm

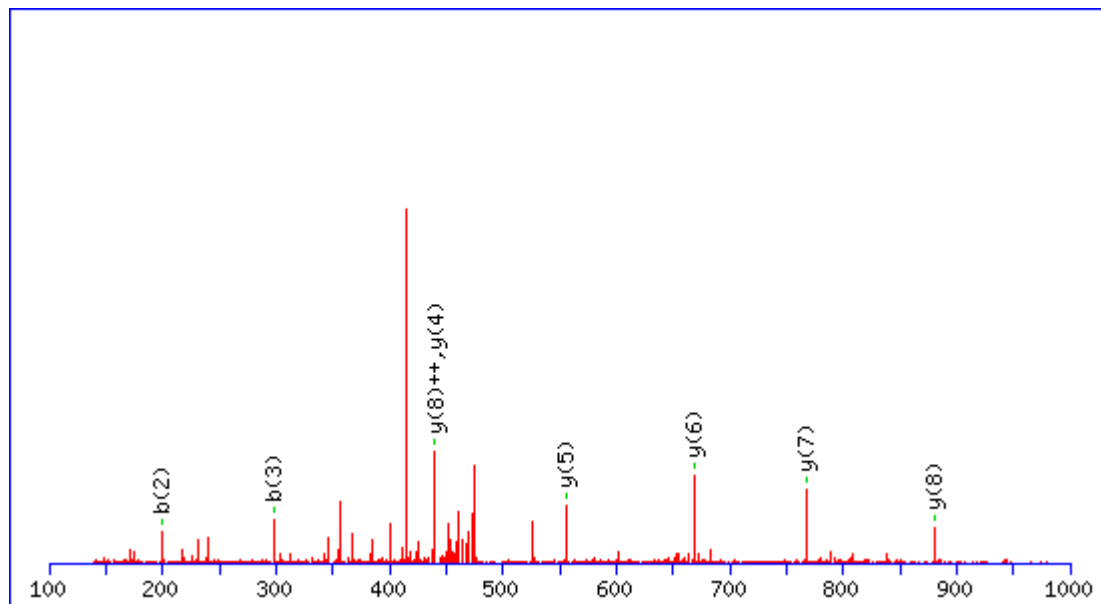

**Monoisotopic mass of neutral peptide Mr(calc):** 964.545410

**Fixed modifications:** Carbamidomethyl (C)

**Variable modifications:**

**N-term :** Dimethyl (N-term)

**Ions Score:** 39 **Expect:** 0.039

**Matches (Bold Red):** 8/64 fragment ions using 12 most intense peaks

| # | b                 | b <sup>++</sup> | b <sup>0</sup> | b <sup>0++</sup> | Seq. | y                 | y <sup>++</sup>   | y <sup>*</sup> | y <sup>*++</sup> | y <sup>0</sup> | y <sup>0++</sup> | # |
|---|-------------------|-----------------|----------------|------------------|------|-------------------|-------------------|----------------|------------------|----------------|------------------|---|
| 1 | 86.060036         | 43.533656       |                |                  | G    |                   |                   |                |                  |                |                  | 9 |
| 2 | <b>199.144100</b> | 100.075688      |                |                  | L    | <b>880.499927</b> | <b>440.753602</b> | 863.473378     | 432.240327       | 862.489362     | 431.748319       | 8 |
| 3 | <b>298.212514</b> | 149.609895      |                |                  | V    | <b>767.415863</b> | 384.211570        | 750.389314     | 375.698295       | 749.405298     | 375.206287       | 7 |
| 4 | 411.296578        | 206.151927      |                |                  | L    | <b>668.347449</b> | 334.677363        | 651.320900     | 326.164088       | 650.336884     | 325.672080       | 6 |
| 5 | 526.323521        | 263.665399      | 508.312956     | 254.660116       | D    | <b>555.263385</b> | 278.135331        | 538.236836     | 269.622056       | 537.252820     | 269.130048       | 5 |
| 6 | 663.382433        | 332.194855      | 645.371868     | 323.189572       | H    | <b>440.236442</b> | 220.621859        | 423.209893     | 212.108585       |                |                  | 4 |
| 7 | 720.403897        | 360.705587      | 702.393332     | 351.700304       | G    | 303.177530        | 152.092403        | 286.150981     | 143.579129       |                |                  | 3 |
| 8 | 791.441011        | 396.224144      | 773.430446     | 387.218861       | A    | 246.156066        | 123.581671        | 229.129517     | 115.068397       |                |                  | 2 |
| 9 |                   |                 |                |                  | R    | 175.118952        | 88.063114         | 158.092403     | 79.549840        |                |                  | 1 |

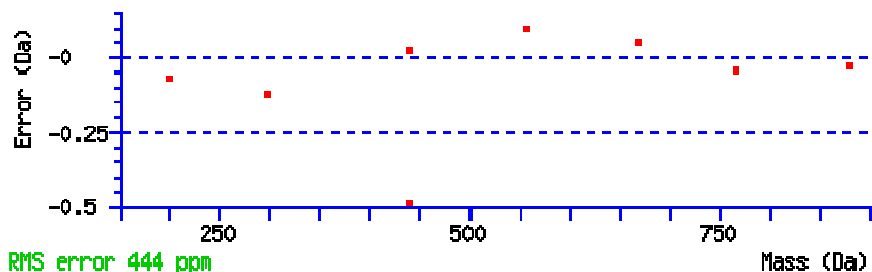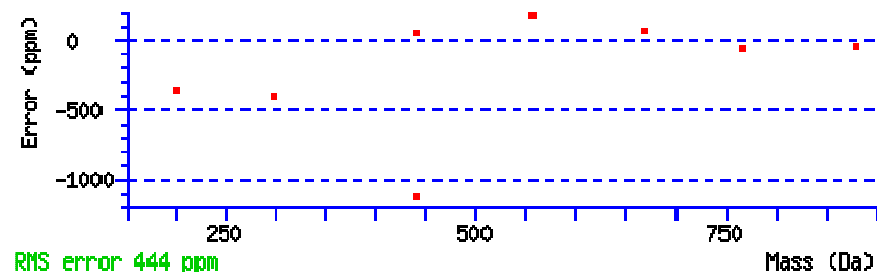

All matches to this query

| Score | Mr(calc):  | Delta     | Sequence                  |
|-------|------------|-----------|---------------------------|
| 39.1  | 964.545410 | -0.000728 | <a href="#">GLVLDHGAR</a> |
| 13.8  | 964.545410 | -0.000728 | <a href="#">VVEIGHQR</a>  |
| 7.5   | 964.545395 | -0.000713 | <a href="#">SSHLTKHK</a>  |
| 6.3   | 964.545395 | -0.000713 | <a href="#">SSHLTKHK</a>  |
| 5.0   | 964.545410 | -0.000728 | <a href="#">IGISPTGHR</a> |
| 2.7   | 964.545395 | -0.000713 | <a href="#">APTLATAHR</a> |
| 2.4   | 964.538864 | 0.005818  | <a href="#">GHMRKHK</a>   |
| 1.8   | 964.538864 | 0.005818  | <a href="#">GHMRKHK</a>   |
| 1.1   | 962.547028 | 1.997654  | <a href="#">SMLLSAIGK</a> |
| 1.0   | 963.550140 | 0.994542  | <a href="#">ASPSPPPKR</a> |

MS/MS Fragmentation of **GSTAPVGGGAFPTIVER**

Found in **IPI00299571.5**, Tax\_Id=9606 Gene\_Symbol=PDIA6 Isoform 2 of Protein disulfide-isomerase A6

Match to Query 5406: 1642.874960 from(822.444756,2+)

Title: Elution from: 36.82 to 40.75 period: FD070412dMavril05.raw experiment: 1 cycles: 1 precIntensity: 569385.1 FinneganScanNumber: 2480

Data file D:\projecttemp\FD080412dM\FD070412dMavril05.msm

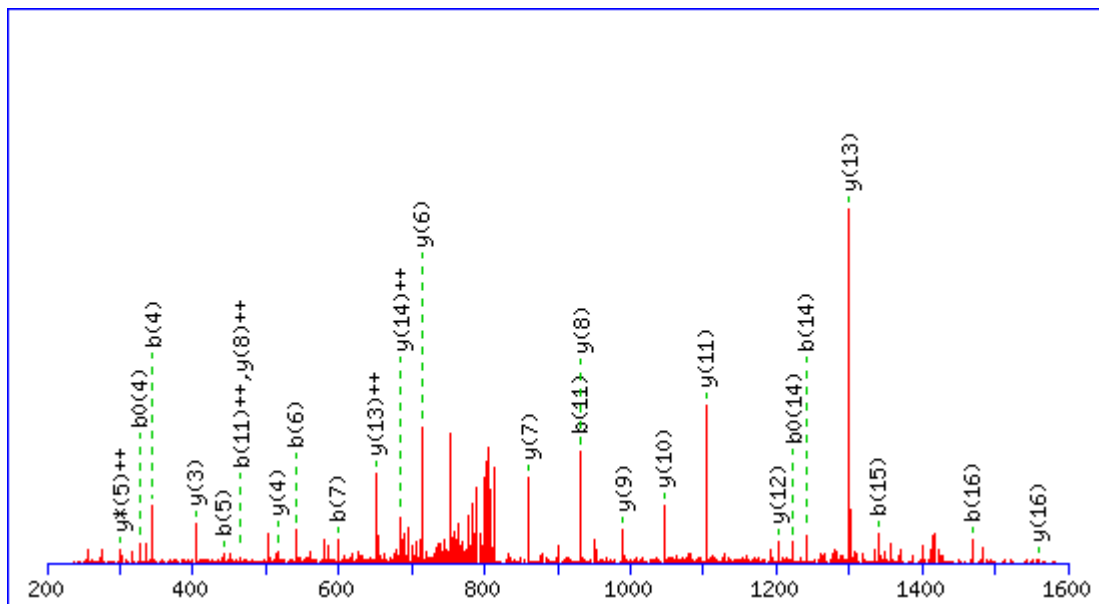

**Monoisotopic mass of neutral peptide Mr(calc):** 1642.867889

**Fixed modifications:** Carbamidomethyl (C)

**Variable modifications:**

**N-term :** Dimethyl (N-term)

**Ions Score:** 70 **Expect:** 4.6e-05

**Matches (Bold Red):** 26/156 fragment ions using 48 most intense peaks



| #  | b           | b <sup>++</sup> | b <sup>0</sup> | b <sup>0++</sup> | Seq. | y           | y <sup>++</sup> | y <sup>*</sup> | y <sup>*++</sup> | y <sup>0</sup> | y <sup>0++</sup> | #  |
|----|-------------|-----------------|----------------|------------------|------|-------------|-----------------|----------------|------------------|----------------|------------------|----|
| 1  | 86.060036   | 43.533656       |                |                  | G    |             |                 |                |                  |                |                  | 17 |
| 2  | 173.092064  | 87.049670       | 155.081499     | 78.044387        | S    | 1558.822385 | 779.914831      | 1541.795836    | 771.401556       | 1540.811820    | 770.909548       | 16 |
| 3  | 274.139743  | 137.573510      | 256.129178     | 128.568227       | T    | 1471.790357 | 736.398817      | 1454.763808    | 727.885542       | 1453.779792    | 727.393534       | 15 |
| 4  | 345.176857  | 173.092066      | 327.166292     | 164.086784       | A    | 1370.742678 | 685.874977      | 1353.716129    | 677.361703       | 1352.732113    | 676.869695       | 14 |
| 5  | 442.229621  | 221.618448      | 424.219056     | 212.613166       | P    | 1299.705564 | 650.356420      | 1282.679015    | 641.843146       | 1281.694999    | 641.351138       | 13 |
| 6  | 541.298035  | 271.152656      | 523.287470     | 262.147373       | V    | 1202.652800 | 601.830038      | 1185.626251    | 593.316764       | 1184.642235    | 592.824756       | 12 |
| 7  | 598.319499  | 299.663388      | 580.308934     | 290.658105       | G    | 1103.584386 | 552.295831      | 1086.557837    | 543.782557       | 1085.573821    | 543.290549       | 11 |
| 8  | 655.340963  | 328.174120      | 637.330398     | 319.168837       | G    | 1046.562922 | 523.785099      | 1029.536373    | 515.271825       | 1028.552357    | 514.779817       | 10 |
| 9  | 712.362427  | 356.684852      | 694.351862     | 347.679569       | G    | 989.541458  | 495.274367      | 972.514909     | 486.761093       | 971.530893     | 486.269085       | 9  |
| 10 | 783.399541  | 392.203409      | 765.388976     | 383.198126       | A    | 932.519994  | 466.763635      | 915.493445     | 458.250360       | 914.509429     | 457.758353       | 8  |
| 11 | 930.467955  | 465.737616      | 912.457390     | 456.732333       | F    | 861.482880  | 431.245078      | 844.456331     | 422.731804       | 843.472315     | 422.239796       | 7  |
| 12 | 1027.520719 | 514.263998      | 1009.510154    | 505.258715       | P    | 714.414466  | 357.710871      | 697.387917     | 349.197597       | 696.403901     | 348.705589       | 6  |
| 13 | 1128.568398 | 564.787837      | 1110.557833    | 555.782555       | T    | 617.361702  | 309.184489      | 600.335153     | 300.671215       | 599.351137     | 300.179207       | 5  |
| 14 | 1241.652462 | 621.329869      | 1223.641897    | 612.324587       | I    | 516.314023  | 258.660650      | 499.287474     | 250.147375       | 498.303458     | 249.655367       | 4  |
| 15 | 1340.720876 | 670.864076      | 1322.710311    | 661.858794       | V    | 403.229959  | 202.118618      | 386.203410     | 193.605343       | 385.219394     | 193.113335       | 3  |
| 16 | 1469.763469 | 735.385373      | 1451.752904    | 726.380090       | E    | 304.161545  | 152.584411      | 287.134996     | 144.071136       | 286.150980     | 143.579128       | 2  |
| 17 |             |                 |                |                  | R    | 175.118952  | 88.063114       | 158.092403     | 79.549839        |                |                  | 1  |

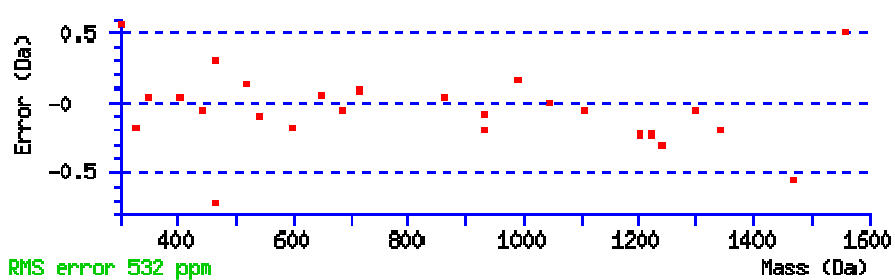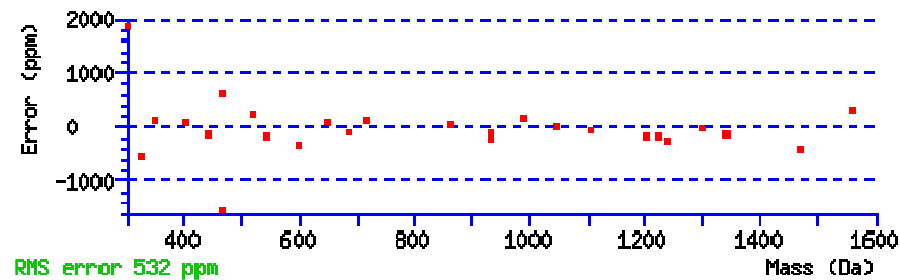

All matches to this query

| Score | Mr(calc):   | Delta    | Sequence                          |
|-------|-------------|----------|-----------------------------------|
| 69.7  | 1642.867889 | 0.007071 | <a href="#">GSTAPVGGGAFPTIVER</a> |
| 9.0   | 1642.871216 | 0.003744 | <a href="#">LQELIDQLECKVR</a>     |

|     |             |           |                                  |
|-----|-------------|-----------|----------------------------------|
| 8.4 | 1641.868546 | 1.006414  | <a href="#">ADELQKQKEELQR</a>    |
| 6.5 | 1642.875061 | -0.000101 | <a href="#">QQQSGSGTKSRPAK</a>   |
| 4.4 | 1642.888962 | -0.014002 | <a href="#">SLQVLNDKNVSNEK</a>   |
| 3.6 | 1642.879059 | -0.004099 | <a href="#">RHQEYKSVG NLEK</a>   |
| 3.2 | 1642.889847 | -0.014887 | <a href="#">ATPRLASTMGMGPLGK</a> |
| 2.6 | 1642.877701 | -0.002741 | <a href="#">IAQTRLLEEEEEK</a>    |
| 2.3 | 1642.864700 | 0.010260  | <a href="#">MQEPRRVTPCLGK</a>    |
| 2.2 | 1642.886459 | -0.011499 | <a href="#">ELWEKNGAVIMAVR</a>   |

---

MS/MS Fragmentation of **HLSVNDLPVGR**

Found in **IPI00024919.3**, Tax\_Id=9606 Gene\_Symbol=PRDX3 Thioredoxin-dependent peroxide reductase, mitochondrial

Match to Query 4286: 1233.684350 from(617.849451,2+)

Title: Elution from: 30.08 to 33.90 period: FD070412dMavril06.raw experiment: 1 cycles: 1 precIntensity: 1599385.7 FinneganScanNumber: 1943

Data file D:\projecttemp\FD080412dM\FD070412dMavril06.msm

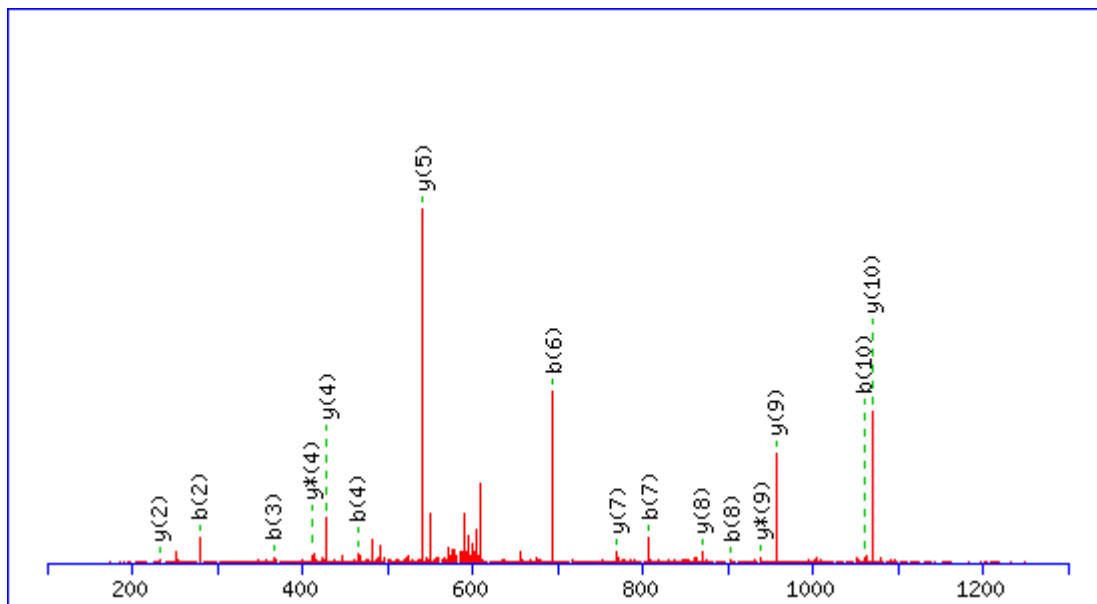

**Monoisotopic mass of neutral peptide Mr(calc):** 1233.682968

**Fixed modifications:** Carbamidomethyl (C)

**Variable modifications:**

**N-term :** Dimethyl (N-term)

**Ions Score:** 44 **Expect:** 0.017

**Matches (Bold Red):** 16/98 fragment ions using 47 most intense peaks

| #  | b                  | b <sup>++</sup> | b*          | b <sup>*++</sup> | b <sup>0</sup> | b <sup>0++</sup> | Seq. | y                  | y <sup>++</sup> | y*                | y <sup>*++</sup> | y <sup>0</sup> | y <sup>0++</sup> | #  |
|----|--------------------|-----------------|-------------|------------------|----------------|------------------|------|--------------------|-----------------|-------------------|------------------|----------------|------------------|----|
| 1  | 166.097484         | 83.552380       |             |                  |                |                  | H    |                    |                 |                   |                  |                |                  | 11 |
| 2  | <b>279.181548</b>  | 140.094412      |             |                  |                |                  | L    | <b>1069.600034</b> | 535.303655      | 1052.573485       | 526.790381       | 1051.589469    | 526.298373       | 10 |
| 3  | <b>366.213576</b>  | 183.610426      |             |                  | 348.203011     | 174.605143       | S    | <b>956.515970</b>  | 478.761623      | <b>939.489421</b> | 470.248349       | 938.505405     | 469.756341       | 9  |
| 4  | <b>465.281990</b>  | 233.144633      |             |                  | 447.271425     | 224.139350       | V    | <b>869.483942</b>  | 435.245609      | 852.457393        | 426.732335       | 851.473377     | 426.240327       | 8  |
| 5  | 579.324917         | 290.166097      | 562.298368  | 281.652822       | 561.314352     | 281.160814       | N    | <b>770.415528</b>  | 385.711402      | 753.388979        | 377.198127       | 752.404963     | 376.706119       | 7  |
| 6  | <b>694.351860</b>  | 347.679568      | 677.325311  | 339.166293       | 676.341295     | 338.674285       | D    | 656.372601         | 328.689939      | 639.346052        | 320.176664       | 638.362036     | 319.684656       | 6  |
| 7  | <b>807.435924</b>  | 404.221600      | 790.409375  | 395.708326       | 789.425359     | 395.216318       | L    | <b>541.345658</b>  | 271.176467      | 524.319109        | 262.663193       |                |                  | 5  |
| 8  | <b>904.488688</b>  | 452.747982      | 887.462139  | 444.234708       | 886.478123     | 443.742700       | P    | <b>428.261594</b>  | 214.634435      | <b>411.235045</b> | 206.121160       |                |                  | 4  |
| 9  | 1003.557102        | 502.282189      | 986.530553  | 493.768914       | 985.546537     | 493.276906       | V    | 331.208830         | 166.108053      | 314.182281        | 157.594778       |                |                  | 3  |
| 10 | <b>1060.578566</b> | 530.792921      | 1043.552017 | 522.279647       | 1042.568001    | 521.787639       | G    | <b>232.140416</b>  | 116.573846      | 215.113867        | 108.060571       |                |                  | 2  |
| 11 |                    |                 |             |                  |                |                  | R    | 175.118952         | 88.063114       | 158.092403        | 79.549839        |                |                  | 1  |

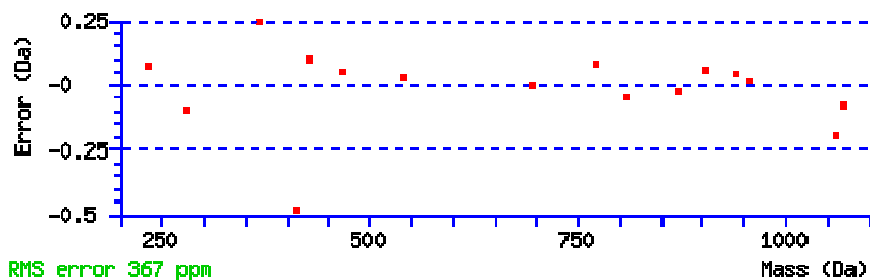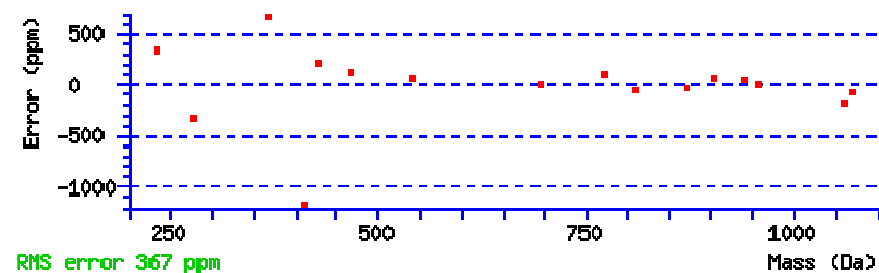

All matches to this query

| Score | Mr(calc):   | Delta     | Sequence                    |
|-------|-------------|-----------|-----------------------------|
| 43.7  | 1233.682968 | 0.001382  | <a href="#">HLSVNDLPVGR</a> |
| 4.0   | 1233.694168 | -0.009818 | <a href="#">RQDLLSRYR</a>   |
| 4.0   | 1233.694168 | -0.009818 | <a href="#">SRRLQEVYR</a>   |
| 4.0   | 1231.671326 | 2.013024  | <a href="#">YQNGVLPWKK</a>  |
| 2.4   | 1232.681183 | 1.003167  | <a href="#">HLVCRLHDK</a>   |
| 1.8   | 1232.679840 | 1.004510  | <a href="#">SILVKDTQAMK</a> |
| 1.6   | 1233.690353 | -0.006003 | <a href="#">MKKDLFPVGR</a>  |
| 1.4   | 1232.676483 | 1.007867  | <a href="#">EGOILKVFQDK</a> |

|     |             |           |                             |
|-----|-------------|-----------|-----------------------------|
| 0.8 | 1233.682968 | 0.001382  | <a href="#">IVVQPETQHR</a>  |
| 0.6 | 1233.694183 | -0.009833 | <a href="#">RGPAAPPDKGR</a> |

MS/MS Fragmentation of **HTAAPDTPADGPV**

Found in **IPI00030362.1**, Tax\_Id=9606 Gene\_Symbol=PLP2 Proteolipid protein 2

Match to Query 4442: 1275.614480 from(638.814516,2+)

Title: Elution from: 21.65 to 25.54 period: FD070412dMavril06.raw experiment: 1 cycles: 1 precIntensity: 2533099.5 FinneganScanNumber: 1311

Data file D:\projecttemp\FD080412dM\FD070412dMavril06.msm

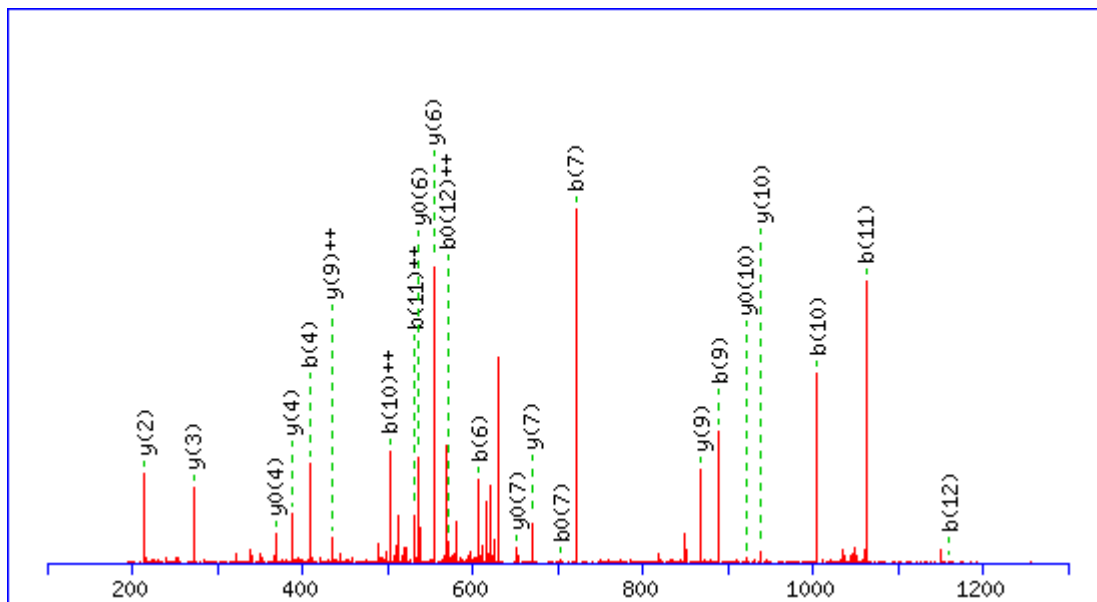

**Monoisotopic mass of neutral peptide Mr(calc):** 1275.609543

**Fixed modifications:** Carbamidomethyl (C)

**Variable modifications:**

**N-term :** Dimethyl (N-term)

**Ions Score:** 60 **Expect:** 0.00018

**Matches (Bold Red):** 23/88 fragment ions using 33 most intense peaks

| #  | b                  | b <sup>++</sup>   | b <sup>0</sup>    | b <sup>0++</sup>  | Seq. | y                 | y <sup>++</sup>   | y <sup>0</sup>    | y <sup>0++</sup> | #  |
|----|--------------------|-------------------|-------------------|-------------------|------|-------------------|-------------------|-------------------|------------------|----|
| 1  | 166.097484         | 83.552380         |                   |                   | H    |                   |                   |                   |                  | 13 |
| 2  | 267.145163         | 134.076219        | 249.134598        | 125.070937        | T    | 1111.526597       | 556.266937        | 1093.516032       | 547.261654       | 12 |
| 3  | 338.182277         | 169.594776        | 320.171712        | 160.589494        | A    | 1010.478918       | 505.743097        | 992.468353        | 496.737815       | 11 |
| 4  | <b>409.219391</b>  | 205.113333        | 391.208826        | 196.108051        | A    | <b>939.441804</b> | 470.224540        | <b>921.431239</b> | 461.219258       | 10 |
| 5  | 506.272155         | 253.639715        | 488.261590        | 244.634433        | P    | <b>868.404690</b> | <b>434.705983</b> | 850.394125        | 425.700701       | 9  |
| 6  | <b>607.319834</b>  | 304.163555        | 589.309269        | 295.158273        | T    | 771.351926        | 386.179601        | 753.341361        | 377.174319       | 8  |
| 7  | <b>722.346777</b>  | 361.677027        | <b>704.336212</b> | 352.671744        | D    | <b>670.304247</b> | 335.655762        | <b>652.293682</b> | 326.650479       | 7  |
| 8  | 819.399541         | 410.203409        | 801.388976        | 401.198126        | P    | <b>555.277304</b> | 278.142290        | <b>537.266739</b> | 269.137008       | 6  |
| 9  | <b>890.436655</b>  | 445.721966        | 872.426090        | 436.716683        | A    | 458.224540        | 229.615908        | 440.213975        | 220.610625       | 5  |
| 10 | <b>1005.463598</b> | <b>503.235437</b> | 987.453033        | 494.230154        | D    | <b>387.187426</b> | 194.097351        | <b>369.176861</b> | 185.092068       | 4  |
| 11 | <b>1062.485062</b> | <b>531.746169</b> | 1044.474497       | 522.740886        | G    | <b>272.160483</b> | 136.583879        |                   |                  | 3  |
| 12 | <b>1159.537826</b> | 580.272551        | 1141.527261       | <b>571.267269</b> | P    | <b>215.139019</b> | 108.073148        |                   |                  | 2  |
| 13 |                    |                   |                   |                   | V    | 118.086255        | 59.546766         |                   |                  | 1  |

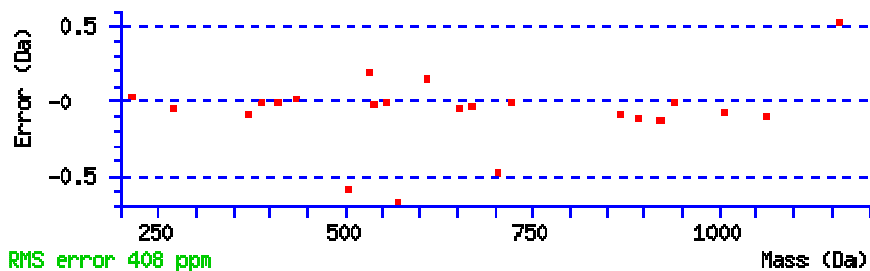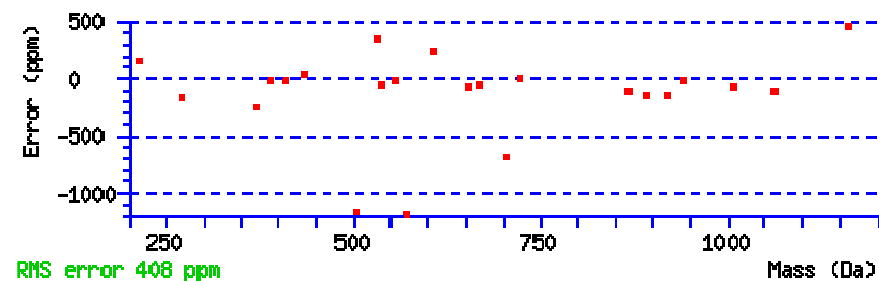

All matches to this query

| Score | Mr(calc):   | Delta     | Sequence                     |
|-------|-------------|-----------|------------------------------|
| 60.2  | 1275.609543 | 0.004937  | <a href="#">HTAAPDPADGPV</a> |
| 11.6  | 1275.624115 | -0.009635 | <a href="#">DPMNKSGGKDR</a>  |
| 8.8   | 1275.606842 | 0.007638  | <a href="#">DDRGGRQGYPR</a>  |
| 5.2   | 1274.618973 | 0.995507  | <a href="#">WGGRSAPTEMR</a>  |
| 4.4   | 1275.624115 | -0.009635 | <a href="#">DPMNKSGGKDR</a>  |
| 4.3   | 1275.620270 | -0.005790 | <a href="#">EGIMNPEVGMK</a>  |

|     |             |           |                              |
|-----|-------------|-----------|------------------------------|
| 3.9 | 1275.624115 | -0.009635 | <a href="#">DRDPMNKSGGK</a>  |
| 3.7 | 1273.601929 | 2.012551  | <a href="#">SRACHEMALR</a>   |
| 3.6 | 1275.620270 | -0.005790 | <a href="#">MLEHTEAVMK</a>   |
| 3.5 | 1274.621490 | 0.992990  | <a href="#">SVQDSGQGGREK</a> |



MS/MS Fragmentation of **HVVFIAQR**

Found in **IPI00008293.4**, Tax\_Id=9606 Gene\_Symbol=LOC149224 similar to mCG19129

Match to Query 3416: 996.587714 from(499.301133,2+)

Title: Elution from: 24.03 to 27.93 period: FD070412dMavril06.raw experiment: 1 cycles: 1 precIntensity: 2693667.9 FinneganScanNumber: 1482

Data file D:\projecttemp\FD080412dM\FD070412dMavril06.msm

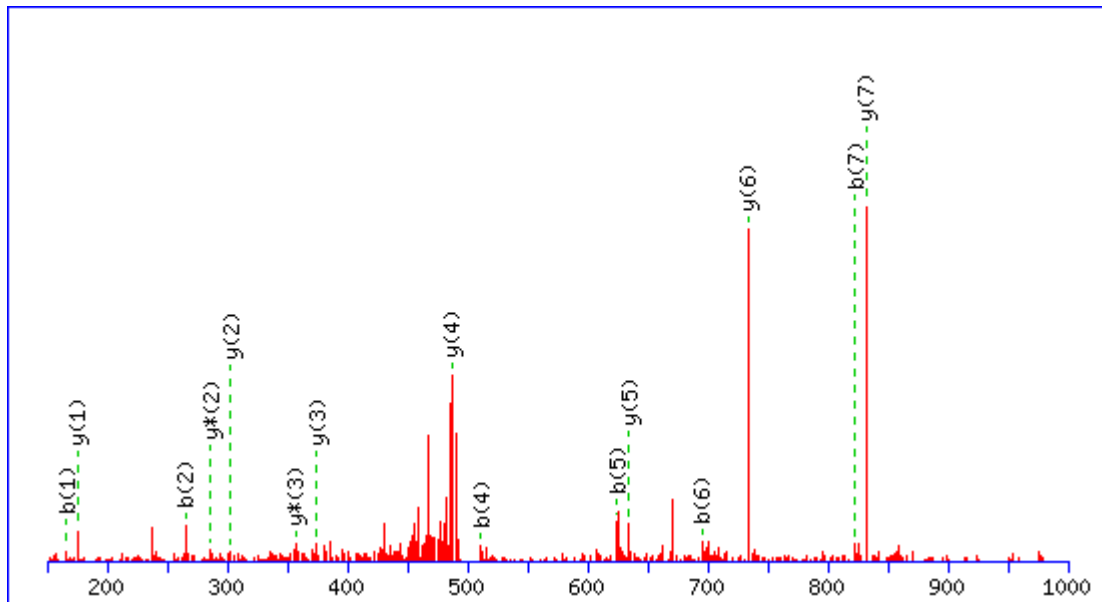

**Monoisotopic mass of neutral peptide Mr(calc):** 996.586884

**Fixed modifications:** Carbamidomethyl (C)

**Variable modifications:**

**N-term :** Dimethyl (N-term)

**Ions Score:** 31 **Expect:** 0.13

**Matches (Bold Red):** 15/44 fragment ions using 57 most intense peaks

| # | b          | b <sup>++</sup> | b <sup>*</sup> | b <sup>*++</sup> | Seq. | y          | y <sup>++</sup> | y <sup>*</sup> | y <sup>*++</sup> | # |
|---|------------|-----------------|----------------|------------------|------|------------|-----------------|----------------|------------------|---|
| 1 | 166.097484 | 83.552380       |                |                  | H    |            |                 |                |                  | 8 |
| 2 | 265.165898 | 133.086587      |                |                  | V    | 832.503950 | 416.755613      | 815.477401     | 408.242339       | 7 |
| 3 | 364.234312 | 182.620794      |                |                  | V    | 733.435536 | 367.221406      | 716.408987     | 358.708131       | 6 |
| 4 | 511.302726 | 256.155001      |                |                  | F    | 634.367122 | 317.687199      | 617.340573     | 309.173924       | 5 |
| 5 | 624.386790 | 312.697033      |                |                  | I    | 487.298708 | 244.152992      | 470.272159     | 235.639717       | 4 |
| 6 | 695.423904 | 348.215590      |                |                  | A    | 374.214644 | 187.610960      | 357.188095     | 179.097685       | 3 |
| 7 | 823.482482 | 412.244879      | 806.455933     | 403.731605       | Q    | 303.177530 | 152.092403      | 286.150981     | 143.579128       | 2 |
| 8 |            |                 |                |                  | R    | 175.118952 | 88.063114       | 158.092403     | 79.549839        | 1 |

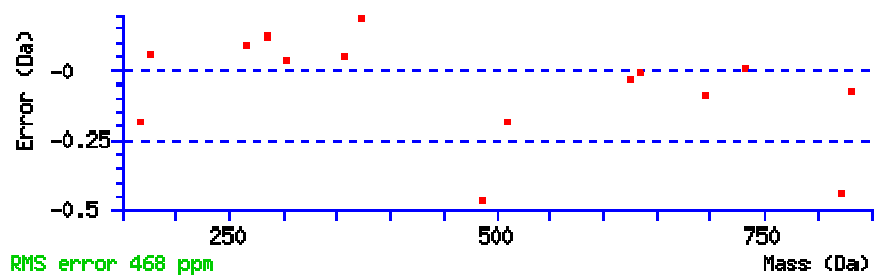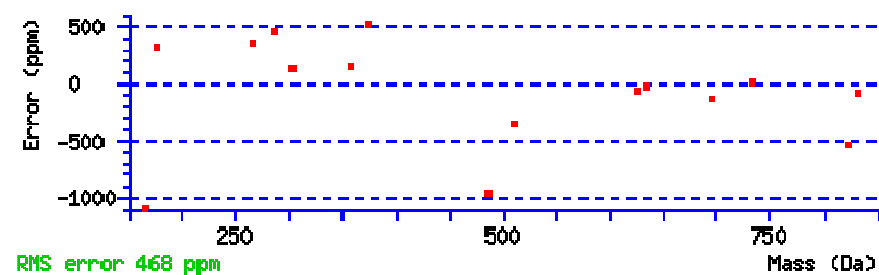

All matches to this query

| Score | Mr(calc):  | Delta     | Sequence                  |
|-------|------------|-----------|---------------------------|
| 31.3  | 996.586884 | 0.000830  | <a href="#">HVVFIAQR</a>  |
| 7.3   | 994.581085 | 2.006629  | <a href="#">HELEKALK</a>  |
| 3.1   | 996.586899 | 0.000815  | <a href="#">HVVFIVQR</a>  |
| 2.5   | 996.596771 | -0.009057 | <a href="#">QVDPVQKK</a>  |
| 2.0   | 994.585114 | 2.002600  | <a href="#">YQPYKIK</a>   |
| 1.9   | 995.576340 | 1.011374  | <a href="#">EKSLQAHK</a>  |
| 1.9   | 995.576340 | 1.011374  | <a href="#">EKSLQAHK</a>  |
| 1.7   | 996.596771 | -0.009057 | <a href="#">VDQVPQKK</a>  |
| 1.6   | 994.581116 | 2.006598  | <a href="#">LNVVPPSNK</a> |
| 1.5   | 995.576355 | 1.011359  | <a href="#">NPEVRTPK</a>  |

MS/MS Fragmentation of **IAAAILNTPDLR**

Found in **IPI00018206.3**, Tax\_Id=9606 Gene\_Symbol=GOT2 Aspartate aminotransferase, mitochondrial

Match to Query 4376: 1295.764992 from(648.889772,2+)

Title: Elution from: 37.74 to 41.57 period: FD070412dMavril07.raw experiment: 1 cycles: 1 precIntensity: 1057304.1 FinneganScanNumber: 2757

Data file D:\projecttemp\FD080412dM\FD070412dMavril07.msm

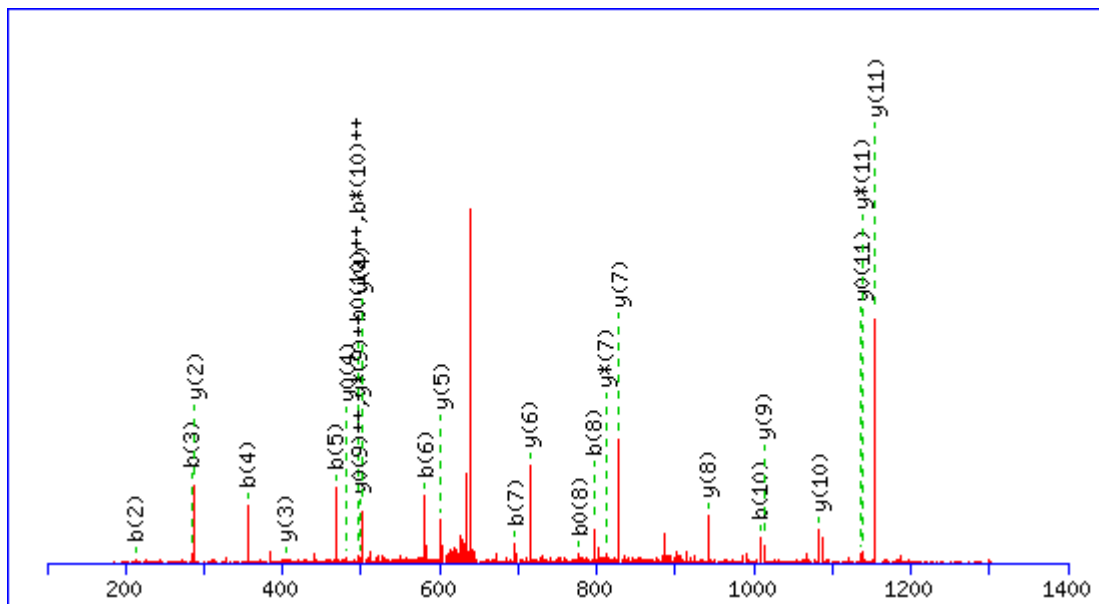

**Monoisotopic mass of neutral peptide Mr(calc):** 1294.760849

**Fixed modifications:** Carbamidomethyl (C)

**Variable modifications:**

**N-term :** Dimethyl (N-term)

**Ions Score:** 68 **Expect:** 3e-05

**Matches (Bold Red):** 27/102 fragment ions using 64 most intense peaks

| #  | b                  | b <sup>++</sup> | b*          | b <sup>*++</sup>  | b <sup>0</sup>    | b <sup>0++</sup>  | Seq. | y                  | y <sup>++</sup> | y*                 | y <sup>*++</sup>  | y <sup>0</sup>     | y <sup>0++</sup>  | #  |
|----|--------------------|-----------------|-------------|-------------------|-------------------|-------------------|------|--------------------|-----------------|--------------------|-------------------|--------------------|-------------------|----|
| 1  | 142.122636         | 71.564956       |             |                   |                   |                   | I    |                    |                 |                    |                   |                    |                   | 12 |
| 2  | <b>213.159750</b>  | 107.083513      |             |                   |                   |                   | A    | <b>1154.652799</b> | 577.830038      | <b>1137.626250</b> | 569.316763        | <b>1136.642234</b> | 568.824755        | 11 |
| 3  | <b>284.196864</b>  | 142.602070      |             |                   |                   |                   | A    | <b>1083.615685</b> | 542.311481      | 1066.589136        | 533.798206        | 1065.605120        | 533.306198        | 10 |
| 4  | <b>355.233978</b>  | 178.120627      |             |                   |                   |                   | A    | <b>1012.578571</b> | 506.792923      | 995.552022         | <b>498.279649</b> | 994.568006         | <b>497.787641</b> | 9  |
| 5  | <b>468.318042</b>  | 234.662659      |             |                   |                   |                   | I    | <b>941.541457</b>  | 471.274366      | 924.514908         | 462.761092        | 923.530892         | 462.269084        | 8  |
| 6  | <b>581.402106</b>  | 291.204691      |             |                   |                   |                   | L    | <b>828.457393</b>  | 414.732334      | <b>811.430844</b>  | 406.219060        | 810.446828         | 405.727052        | 7  |
| 7  | <b>695.445033</b>  | 348.226155      | 678.418484  | 339.712880        |                   |                   | N    | <b>715.373329</b>  | 358.190302      | 698.346780         | 349.677028        | 697.362764         | 349.185020        | 6  |
| 8  | <b>796.492712</b>  | 398.749994      | 779.466163  | 390.236719        | <b>778.482147</b> | 389.744711        | T    | <b>601.330402</b>  | 301.168839      | 584.303853         | 292.655564        | 583.319837         | 292.163556        | 5  |
| 9  | 893.545476         | 447.276376      | 876.518927  | 438.763102        | 875.534911        | 438.271094        | P    | <b>500.282723</b>  | 250.644999      | 483.256174         | 242.131725        | <b>482.272158</b>  | 241.639717        | 4  |
| 10 | <b>1008.572419</b> | 504.789848      | 991.545870  | <b>496.276573</b> | 990.561854        | <b>495.784565</b> | D    | <b>403.229959</b>  | 202.118617      | 386.203410         | 193.605343        | 385.219394         | 193.113335        | 3  |
| 11 | 1121.656483        | 561.331880      | 1104.629934 | 552.818605        | 1103.645918       | 552.326597        | L    | <b>288.203016</b>  | 144.605146      | 271.176467         | 136.091871        |                    |                   | 2  |
| 12 |                    |                 |             |                   |                   |                   | R    | 175.118952         | 88.063114       | 158.092403         | 79.549839         |                    |                   | 1  |

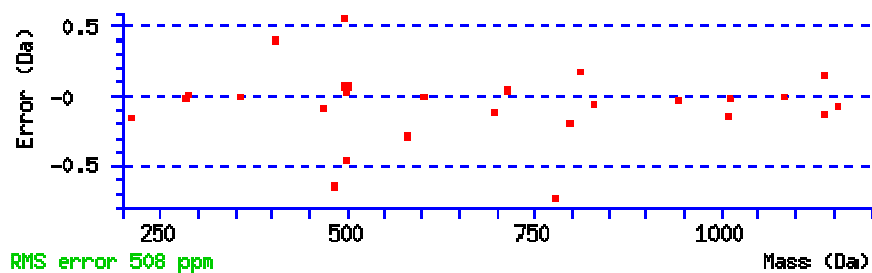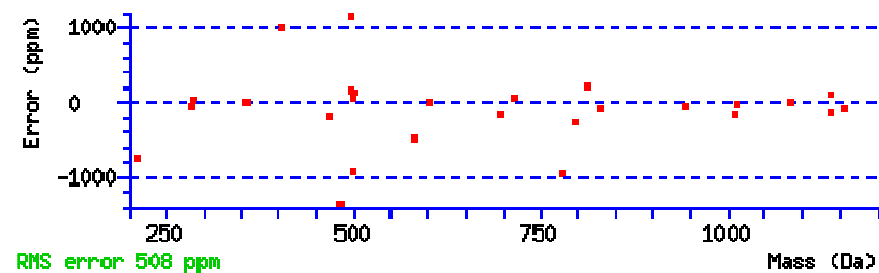

All matches to this query

| Score | Mr(calc):   | Delta    | Sequence                      |
|-------|-------------|----------|-------------------------------|
| 68.3  | 1294.760849 | 1.004143 | <a href="#">IAAAILNTPDLR</a>  |
| 14.3  | 1294.760880 | 1.004112 | <a href="#">AGTPLGTAPTLLR</a> |
| 7.9   | 1294.760849 | 1.004143 | <a href="#">ALALDLGSPAALR</a> |
| 6.8   | 1294.753647 | 1.011345 | <a href="#">LAAFLESTFLK</a>   |
| 5.8   | 1294.749619 | 1.015373 | <a href="#">ALEQDLPVNIK</a>   |
| 5.8   | 1294.760849 | 1.004143 | <a href="#">KDHTASLLNLK</a>   |
| 5.7   | 1294.760849 | 1.004143 | <a href="#">KDHTASLLNLK</a>   |

|     |             |          |                               |
|-----|-------------|----------|-------------------------------|
| 5.3 | 1294.760880 | 1.004112 | <a href="#">VALSPAGVQNLVK</a> |
| 4.5 | 1293.762924 | 2.002068 | <a href="#">TLPRSGPRNLR</a>   |
| 3.4 | 1295.756104 | 0.008888 | <a href="#">LLEQGAAVNLR</a>   |

MS/MS Fragmentation of **IAQLICER**

Found in **IPI00013679.1**, Tax\_Id=9606 Gene\_Symbol=DUT Isoform 1 of Deoxyuridine 5'-triphosphate nucleotidohydrolase, mitochondrial

Match to Query 3530: 1029.568874 from(515.791713,2+)

Title: Elution from: 26.83 to 30.77 period: FD070412dMavril06.raw experiment: 1 cycles: 1 precIntensity: 734691.0 FinneganScanNumber: 1701

Data file D:\projecttemp\FD080412dM\FD070412dMavril06.msm

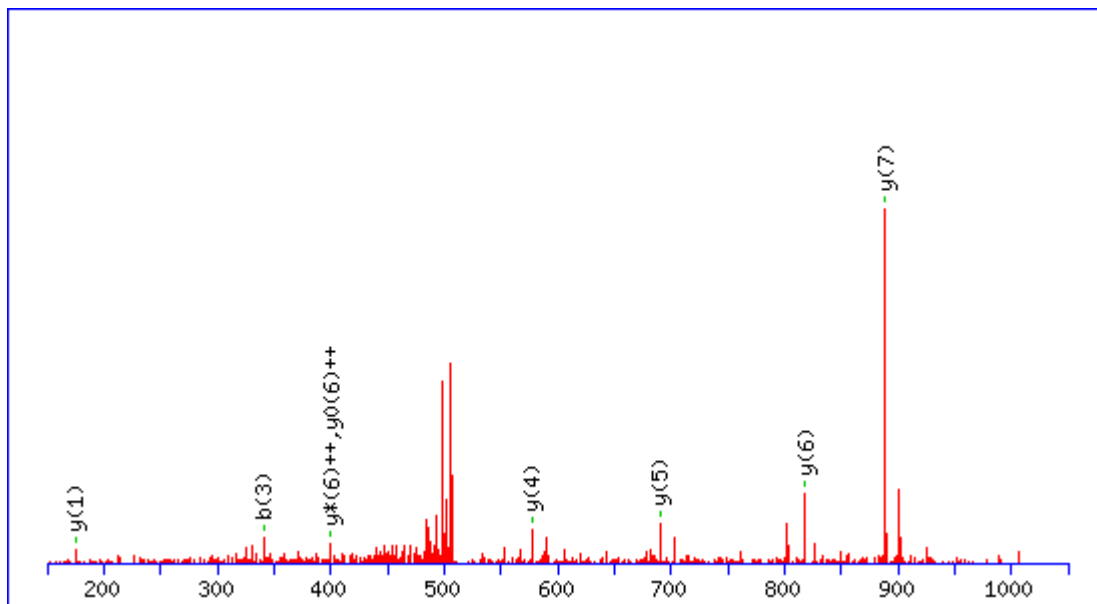

**Monoisotopic mass of neutral peptide Mr(calc):** 1029.564072

**Fixed modifications:** Carbamidomethyl (C)

**Variable modifications:**

**N-term :** Dimethyl (N-term)

**Ions Score:** 36 **Expect:** 0.094

**Matches (Bold Red):** 8/66 fragment ions using 25 most intense peaks

| # | b          | b <sup>++</sup> | b*         | b <sup>*++</sup> | b <sup>0</sup> | b <sup>0++</sup> | Seq. | y          | y <sup>++</sup> | y*         | y <sup>*++</sup> | y <sup>0</sup> | y <sup>0++</sup> | # |
|---|------------|-----------------|------------|------------------|----------------|------------------|------|------------|-----------------|------------|------------------|----------------|------------------|---|
| 1 | 142.122636 | 71.564956       |            |                  |                |                  | I    |            |                 |            |                  |                |                  | 8 |
| 2 | 213.159750 | 107.083513      |            |                  |                |                  | A    | 889.456014 | 445.231645      | 872.429465 | 436.718371       | 871.445449     | 436.226363       | 7 |
| 3 | 341.218328 | 171.112802      | 324.191779 | 162.599527       |                |                  | Q    | 818.418900 | 409.713088      | 801.392351 | 401.199814       | 800.408335     | 400.707806       | 6 |
| 4 | 454.302392 | 227.654834      | 437.275843 | 219.141559       |                |                  | L    | 690.360322 | 345.683799      | 673.333773 | 337.170525       | 672.349757     | 336.678517       | 5 |
| 5 | 567.386456 | 284.196866      | 550.359907 | 275.683592       |                |                  | I    | 577.276258 | 289.141767      | 560.249709 | 280.628493       | 559.265693     | 280.136485       | 4 |
| 6 | 727.417105 | 364.212191      | 710.390556 | 355.698916       |                |                  | C    | 464.192194 | 232.599735      | 447.165645 | 224.086461       | 446.181629     | 223.594453       | 3 |
| 7 | 856.459698 | 428.733487      | 839.433149 | 420.220213       | 838.449133     | 419.728205       | E    | 304.161545 | 152.584411      | 287.134996 | 144.071136       | 286.150980     | 143.579128       | 2 |
| 8 |            |                 |            |                  |                |                  | R    | 175.118952 | 88.063114       | 158.092403 | 79.549840        |                |                  | 1 |

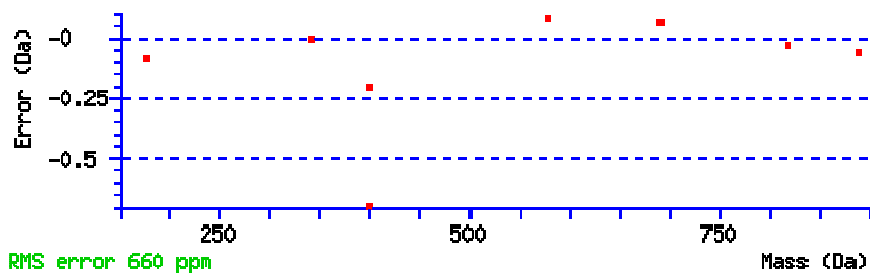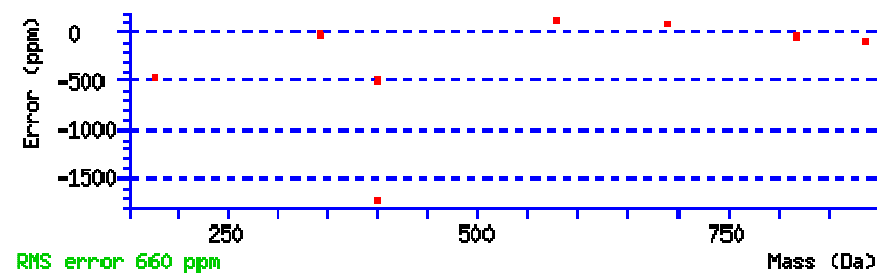

All matches to this query

| Score | Mr(calc):   | Delta     | Sequence                   |
|-------|-------------|-----------|----------------------------|
| 35.9  | 1029.564072 | 0.004802  | <a href="#">IAQLICER</a>   |
| 11.6  | 1029.564072 | 0.004802  | <a href="#">LACLAGELR</a>  |
| 11.6  | 1029.560699 | 0.008175  | <a href="#">LAETYLHR</a>   |
| 11.6  | 1029.560699 | 0.008175  | <a href="#">LALGSEAWR</a>  |
| 11.5  | 1029.564087 | 0.004787  | <a href="#">EVCQLLR</a>    |
| 11.0  | 1029.564102 | 0.004772  | <a href="#">VLQPATMVR</a>  |
| 10.9  | 1029.570602 | -0.001728 | <a href="#">LSVGDIENTK</a> |
| 10.7  | 1027.559647 | 2.009227  | <a href="#">LPAGKMNNR</a>  |
| 10.7  | 1028.565460 | 1.003414  | <a href="#">PNKEVTWK</a>   |
| 10.7  | 1028.561462 | 1.007412  | <a href="#">PNKVTTVDR</a>  |

MS/MS Fragmentation of **IAQPNYIPTQQDVL**R

Found in **IPI00337415.9**, Tax\_Id=9606 Gene\_Symbol=GNAI1 Guanine nucleotide-binding protein G(i), alpha-1 subunit

Match to Query 6293: 1782.964058 from(892.489305,2+)

Title: Elution from: 36.20 to 40.00 period: FD070412dMavril07.raw experiment: 1 cycles: 1 precIntensity: 258010.5 FinneganScanNumber: 2634

Data file D:\projecttemp\FD080412dM\FD070412dMavril07.msm

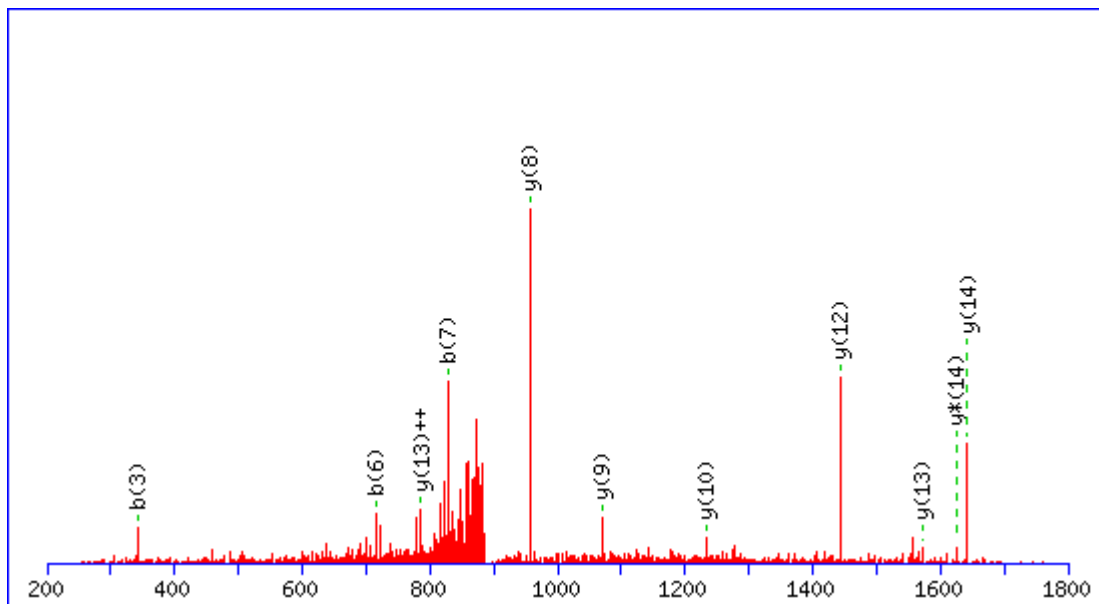

**Monoisotopic mass of neutral peptide Mr(calc):** 1782.962814

**Fixed modifications:** Carbamidomethyl (C)

**Variable modifications:**

**N-term :** Dimethyl (N-term)

**Ions Score:** 23 **Expect:** 1.8

**Matches (Bold Red):** 11/142 fragment ions using 37 most intense peaks



| #  | b           | b <sup>++</sup> | b*          | b <sup>*++</sup> | b <sup>0</sup> | b <sup>0++</sup> | Seq. | y           | y <sup>++</sup> | y*          | y <sup>*++</sup> | y <sup>0</sup> | y <sup>0++</sup> | #  |
|----|-------------|-----------------|-------------|------------------|----------------|------------------|------|-------------|-----------------|-------------|------------------|----------------|------------------|----|
| 1  | 142.122636  | 71.564956       |             |                  |                |                  | I    |             |                 |             |                  |                |                  | 15 |
| 2  | 213.159750  | 107.083513      |             |                  |                |                  | A    | 1642.854748 | 821.931012      | 1625.828199 | 813.417738       | 1624.844183    | 812.925730       | 14 |
| 3  | 341.218328  | 171.112802      | 324.191779  | 162.599527       |                |                  | Q    | 1571.817634 | 786.412455      | 1554.791085 | 777.899181       | 1553.807069    | 777.407173       | 13 |
| 4  | 438.271092  | 219.639184      | 421.244543  | 211.125910       |                |                  | P    | 1443.759056 | 722.383166      | 1426.732507 | 713.869892       | 1425.748491    | 713.377884       | 12 |
| 5  | 552.314019  | 276.660648      | 535.287470  | 268.147373       |                |                  | N    | 1346.706292 | 673.856784      | 1329.679743 | 665.343510       | 1328.695727    | 664.851502       | 11 |
| 6  | 715.377348  | 358.192312      | 698.350799  | 349.679038       |                |                  | Y    | 1232.663365 | 616.835321      | 1215.636816 | 608.322046       | 1214.652800    | 607.830038       | 10 |
| 7  | 828.461412  | 414.734344      | 811.434863  | 406.221070       |                |                  | I    | 1069.600036 | 535.303656      | 1052.573487 | 526.790382       | 1051.589471    | 526.298374       | 9  |
| 8  | 925.514176  | 463.260726      | 908.487627  | 454.747452       |                |                  | P    | 956.515972  | 478.761624      | 939.489423  | 470.248350       | 938.505407     | 469.756342       | 8  |
| 9  | 1026.561855 | 513.784566      | 1009.535306 | 505.271291       | 1008.551290    | 504.779283       | T    | 859.463208  | 430.235242      | 842.436659  | 421.721968       | 841.452643     | 421.229960       | 7  |
| 10 | 1154.620433 | 577.813855      | 1137.593884 | 569.300580       | 1136.609868    | 568.808572       | Q    | 758.415529  | 379.711403      | 741.388980  | 371.198128       | 740.404964     | 370.706120       | 6  |
| 11 | 1282.679011 | 641.843144      | 1265.652462 | 633.329869       | 1264.668446    | 632.837861       | Q    | 630.356951  | 315.682114      | 613.330402  | 307.168839       | 612.346386     | 306.676831       | 5  |
| 12 | 1397.705954 | 699.356615      | 1380.679405 | 690.843341       | 1379.695389    | 690.351333       | D    | 502.298373  | 251.652824      | 485.271824  | 243.139550       | 484.287808     | 242.647542       | 4  |
| 13 | 1496.774368 | 748.890822      | 1479.747819 | 740.377548       | 1478.763803    | 739.885540       | V    | 387.271430  | 194.139353      | 370.244881  | 185.626078       |                |                  | 3  |
| 14 | 1609.858432 | 805.432854      | 1592.831883 | 796.919580       | 1591.847867    | 796.427572       | L    | 288.203016  | 144.605146      | 271.176467  | 136.091871       |                |                  | 2  |
| 15 |             |                 |             |                  |                |                  | R    | 175.118952  | 88.063114       | 158.092403  | 79.549839        |                |                  | 1  |

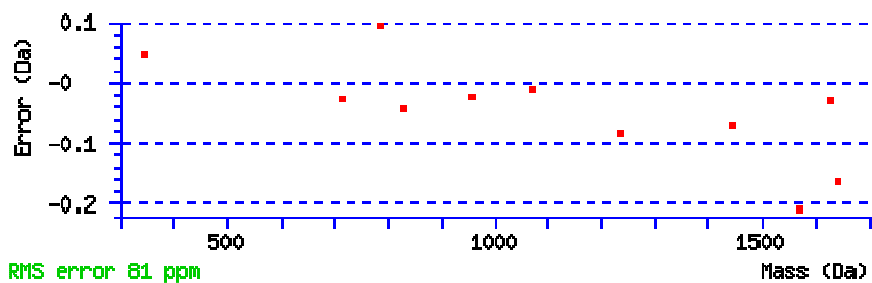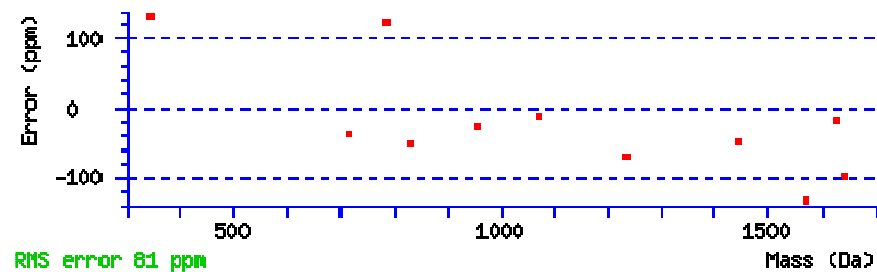

All matches to this query

| Score | Mr(calc):   | Delta     | Sequence                        |
|-------|-------------|-----------|---------------------------------|
| 22.9  | 1782.962814 | 0.001244  | <a href="#">IAQPNYIPTQQDVLR</a> |
| 11.0  | 1782.977402 | -0.013344 | <a href="#">KRSVSEIQLMHNLGK</a> |
| 11.0  | 1782.977402 | -0.013344 | <a href="#">KRSVSEIQLMHNLGK</a> |
| 9.8   | 1782.947525 | 0.016533  | <a href="#">LSQEEQLKSHESKLK</a> |

|     |             |           |                                   |
|-----|-------------|-----------|-----------------------------------|
| 7.9 | 1781.956314 | 1.007744  | <a href="#">KILEDDKGAFQLYSK</a>   |
| 6.7 | 1782.976730 | -0.012672 | <a href="#">DLYLIPLSAQDPVPSK</a>  |
| 5.9 | 1782.972702 | -0.008644 | <a href="#">NPTPESVAIGELKGTSK</a> |
| 3.7 | 1782.947556 | 0.016502  | <a href="#">DIQDENQLLVADVCR</a>   |
| 2.6 | 1782.951569 | 0.012489  | <a href="#">LKPEGAPEPEGVAAPPK</a> |
| 1.7 | 1781.974762 | 0.989296  | <a href="#">KIAEETAVAQRPGGATR</a> |

MS/MS Fragmentation of **IATLGYLPTQQDVL**R

Found in **IPI00305551.3**, Tax\_Id=9606 Gene\_Symbol=GNA11 Guanine nucleotide-binding protein subunit alpha-11

Match to Query 5960: 1714.969456 from(858.492004,2+)

Title: Elution from: 42.69 to 46.68 period: FD070412dMavril07.raw experiment: 1 cycles: 1 precIntensity: 515771.8 FinneganScanNumber: 3162

Data file D:\projecttemp\FD080412dM\FD070412dMavril07.msm

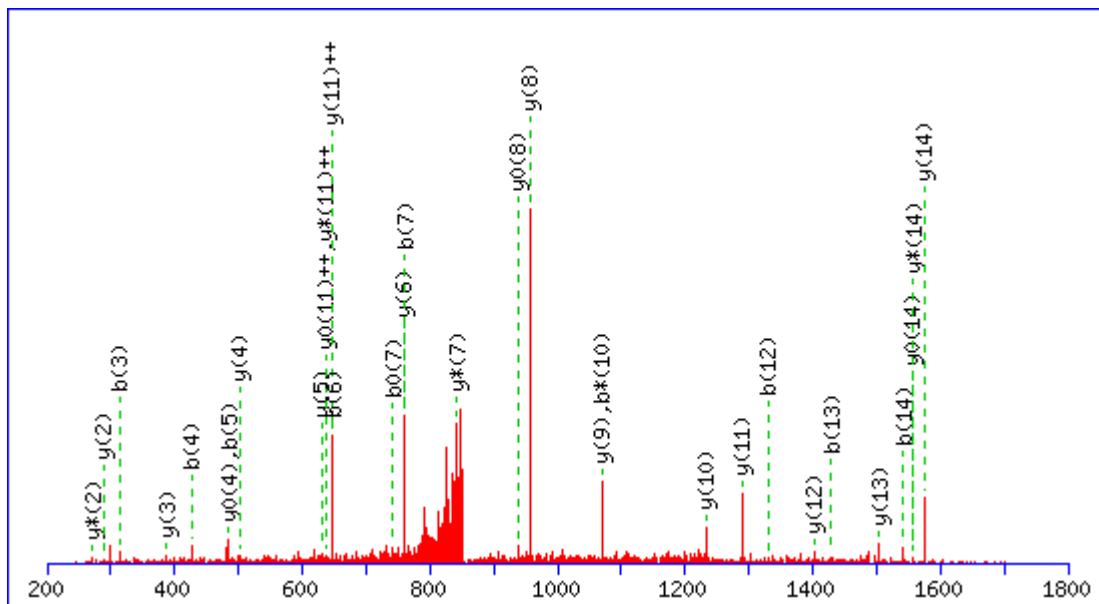

**Monoisotopic mass of neutral peptide Mr(calc):** 1714.961761

**Fixed modifications:** Carbamidomethyl (C)

**Variable modifications:**

**N-term :** Dimethyl (N-term)

**Ions Score:** 50 **Expect:** 0.0029

**Matches (Bold Red):** 31/140 fragment ions using 84 most intense peaks

| #  | b           | b <sup>++</sup> | b*          | b <sup>*++</sup> | b <sup>0</sup> | b <sup>0++</sup> | Seq. | y           | y <sup>++</sup> | y*          | y <sup>*++</sup> | y <sup>0</sup> | y <sup>0++</sup> | #  |
|----|-------------|-----------------|-------------|------------------|----------------|------------------|------|-------------|-----------------|-------------|------------------|----------------|------------------|----|
| 1  | 142.122636  | 71.564956       |             |                  |                |                  | I    |             |                 |             |                  |                |                  | 15 |
| 2  | 213.159750  | 107.083513      |             |                  |                |                  | A    | 1574.853686 | 787.930481      | 1557.827137 | 779.417207       | 1556.843121    | 778.925199       | 14 |
| 3  | 314.207429  | 157.607352      |             |                  | 296.196864     | 148.602070       | T    | 1503.816572 | 752.411924      | 1486.790023 | 743.898650       | 1485.806007    | 743.406641       | 13 |
| 4  | 427.291493  | 214.149384      |             |                  | 409.280928     | 205.144102       | L    | 1402.768893 | 701.888085      | 1385.742344 | 693.374810       | 1384.758328    | 692.882802       | 12 |
| 5  | 484.312957  | 242.660116      |             |                  | 466.302392     | 233.654834       | G    | 1289.684829 | 645.346053      | 1272.658280 | 636.832778       | 1271.674264    | 636.340770       | 11 |
| 6  | 647.376286  | 324.191781      |             |                  | 629.365721     | 315.186499       | Y    | 1232.663365 | 616.835321      | 1215.636816 | 608.322046       | 1214.652800    | 607.830038       | 10 |
| 7  | 760.460350  | 380.733813      |             |                  | 742.449785     | 371.728531       | L    | 1069.600036 | 535.303656      | 1052.573487 | 526.790382       | 1051.589471    | 526.298374       | 9  |
| 8  | 857.513114  | 429.260195      |             |                  | 839.502549     | 420.254913       | P    | 956.515972  | 478.761624      | 939.489423  | 470.248350       | 938.505407     | 469.756342       | 8  |
| 9  | 958.560793  | 479.784035      |             |                  | 940.550228     | 470.778752       | T    | 859.463208  | 430.235242      | 842.436659  | 421.721968       | 841.452643     | 421.229960       | 7  |
| 10 | 1086.619371 | 543.813324      | 1069.592822 | 535.300049       | 1068.608806    | 534.808041       | Q    | 758.415529  | 379.711403      | 741.388980  | 371.198128       | 740.404964     | 370.706120       | 6  |
| 11 | 1214.677949 | 607.842613      | 1197.651400 | 599.329338       | 1196.667384    | 598.837330       | Q    | 630.356951  | 315.682114      | 613.330402  | 307.168839       | 612.346386     | 306.676831       | 5  |
| 12 | 1329.704892 | 665.356084      | 1312.678343 | 656.842810       | 1311.694327    | 656.350802       | D    | 502.298373  | 251.652824      | 485.271824  | 243.139550       | 484.287808     | 242.647542       | 4  |
| 13 | 1428.773306 | 714.890291      | 1411.746757 | 706.377017       | 1410.762741    | 705.885009       | V    | 387.271430  | 194.139353      | 370.244881  | 185.626078       |                |                  | 3  |
| 14 | 1541.857370 | 771.432323      | 1524.830821 | 762.919049       | 1523.846805    | 762.427041       | L    | 288.203016  | 144.605146      | 271.176467  | 136.091871       |                |                  | 2  |
| 15 |             |                 |             |                  |                |                  | R    | 175.118952  | 88.063114       | 158.092403  | 79.549839        |                |                  | 1  |

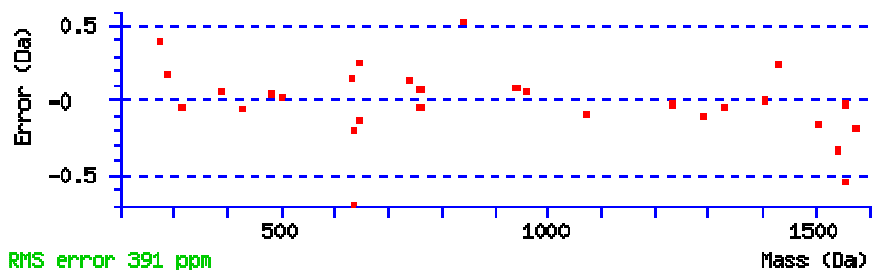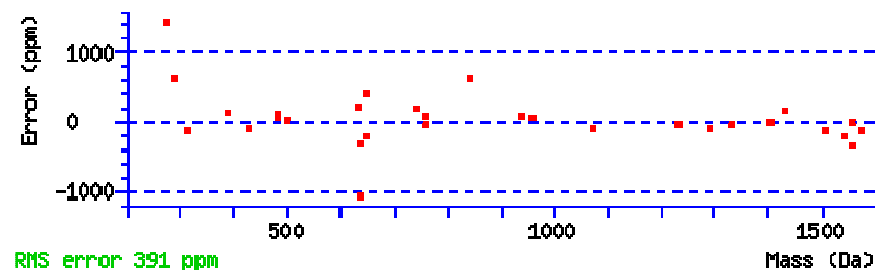

All matches to this query

| Score | Mr(calc):   | Delta     | Sequence                            |
|-------|-------------|-----------|-------------------------------------|
| 50.5  | 1714.961761 | 0.007695  | <a href="#">IATLGYLPTQODVLR</a>     |
| 8.4   | 1714.979034 | -0.009578 | <a href="#">IATLMDSLDPDITLLK</a>    |
| 5.7   | 1714.972946 | -0.003490 | <a href="#">AAKYGVGTPAAAAAKAAAK</a> |
| 5.7   | 1714.977005 | -0.007549 | <a href="#">PSKKAPVQWIPPPDK</a>     |

|     |             |           |                                   |
|-----|-------------|-----------|-----------------------------------|
| 4.1 | 1714.980347 | -0.010891 | <a href="#">AELINIHLMVELK</a>     |
| 4.0 | 1714.957733 | 0.011723  | <a href="#">LELTPTTSLSTRVNR</a>   |
| 3.6 | 1714.961731 | 0.007725  | <a href="#">NLTLKTL SGLNWA EK</a> |
| 3.6 | 1714.971619 | -0.002163 | <a href="#">IDSKEKQVILTEEK</a>    |
| 3.6 | 1714.965118 | 0.004338  | <a href="#">IMLKGGNITLLQSVSN</a>  |
| 3.2 | 1712.975952 | 1.993504  | <a href="#">MKOISLDIFKGLHR</a>    |

MS/MS Fragmentation of **IEDLSQQAQLAAAEK**

Found in **IPI00023748.3**, Tax\_Id=9606 Gene\_Symbol=NACA Nascent polypeptide-associated complex subunit alpha

Match to Query 5494: 1641.858172 from(821.936362,2+)

Title: Elution from: 30.85 to 34.72 period: FD070412dMavril07.raw experiment: 1 cycles: 1 precIntensity: 477596.0 FinneganScanNumber: 2194

Data file D:\projecttemp\FD080412dM\FD070412dMavril07.msm

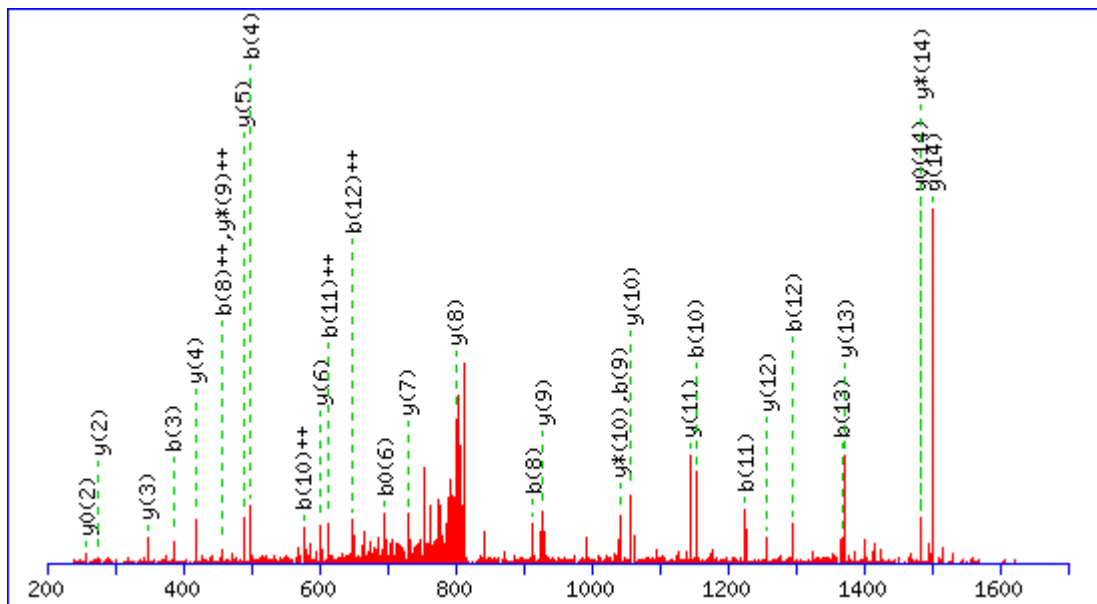

**Monoisotopic mass of neutral peptide Mr(calc):** 1641.857315

**Fixed modifications:** Carbamidomethyl (C)

**Variable modifications:**

**N-term :** Dimethyl (N-term)

**Ions Score:** 101 **Expect:** 3e-08

**Matches (Bold Red):** 31/154 fragment ions using 65 most intense peaks

| #  | b           | b <sup>++</sup> | b*          | b <sup>*++</sup> | b <sup>0</sup> | b <sup>0++</sup> | Seq. | y           | y <sup>++</sup> | y*          | y <sup>*++</sup> | y <sup>0</sup> | y <sup>0++</sup> | #  |
|----|-------------|-----------------|-------------|------------------|----------------|------------------|------|-------------|-----------------|-------------|------------------|----------------|------------------|----|
| 1  | 142.122636  | 71.564956       |             |                  |                |                  | I    |             |                 |             |                  |                |                  | 15 |
| 2  | 271.165229  | 136.086253      |             |                  | 253.154664     | 127.080970       | E    | 1501.749279 | 751.378278      | 1484.722730 | 742.865003       | 1483.738714    | 742.372995       | 14 |
| 3  | 386.192172  | 193.599724      |             |                  | 368.181607     | 184.594442       | D    | 1372.706686 | 686.856981      | 1355.680137 | 678.343707       | 1354.696121    | 677.851698       | 13 |
| 4  | 499.276236  | 250.141756      |             |                  | 481.265671     | 241.136474       | L    | 1257.679743 | 629.343509      | 1240.653194 | 620.830235       | 1239.669178    | 620.338227       | 12 |
| 5  | 586.308264  | 293.657770      |             |                  | 568.297699     | 284.652488       | S    | 1144.595679 | 572.801478      | 1127.569130 | 564.288203       | 1126.585114    | 563.796195       | 11 |
| 6  | 714.366842  | 357.687059      | 697.340293  | 349.173785       | 696.356277     | 348.681777       | Q    | 1057.563651 | 529.285463      | 1040.537102 | 520.772189       | 1039.553086    | 520.280181       | 10 |
| 7  | 842.425420  | 421.716348      | 825.398871  | 413.203074       | 824.414855     | 412.711066       | Q    | 929.505073  | 465.256174      | 912.478524  | 456.742900       | 911.494508     | 456.250892       | 9  |
| 8  | 913.462534  | 457.234905      | 896.435985  | 448.721631       | 895.451969     | 448.229623       | A    | 801.446495  | 401.226885      | 784.419946  | 392.713611       | 783.435930     | 392.221603       | 8  |
| 9  | 1041.521112 | 521.264194      | 1024.494563 | 512.750920       | 1023.510547    | 512.258912       | Q    | 730.409381  | 365.708328      | 713.382832  | 357.195054       | 712.398816     | 356.703046       | 7  |
| 10 | 1154.605176 | 577.806226      | 1137.578627 | 569.292952       | 1136.594611    | 568.800944       | L    | 602.350803  | 301.679039      | 585.324254  | 293.165765       | 584.340238     | 292.673757       | 6  |
| 11 | 1225.642290 | 613.324783      | 1208.615741 | 604.811509       | 1207.631725    | 604.319501       | A    | 489.266739  | 245.137007      | 472.240190  | 236.623733       | 471.256174     | 236.131725       | 5  |
| 12 | 1296.679404 | 648.843340      | 1279.652855 | 640.330066       | 1278.668839    | 639.838058       | A    | 418.229625  | 209.618450      | 401.203076  | 201.105176       | 400.219060     | 200.613168       | 4  |
| 13 | 1367.716518 | 684.361897      | 1350.689969 | 675.848623       | 1349.705953    | 675.356615       | A    | 347.192511  | 174.099893      | 330.165962  | 165.586619       | 329.181946     | 165.094611       | 3  |
| 14 | 1496.759111 | 748.883194      | 1479.732562 | 740.369919       | 1478.748546    | 739.877911       | E    | 276.155397  | 138.581336      | 259.128848  | 130.068062       | 258.144832     | 129.576054       | 2  |
| 15 |             |                 |             |                  |                |                  | K    | 147.112804  | 74.060040       | 130.086255  | 65.546765        |                |                  | 1  |

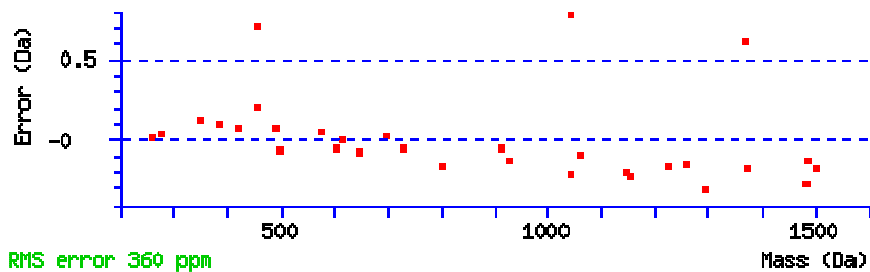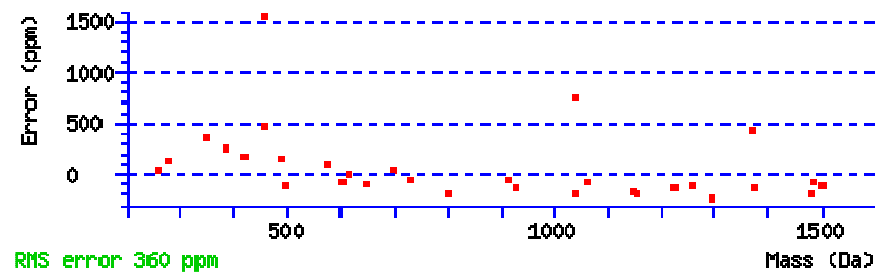

All matches to this query

| Score | Mr(calc):   | Delta     | Sequence                        |
|-------|-------------|-----------|---------------------------------|
| 101.0 | 1641.857315 | 0.000857  | <a href="#">IEDLSQQAQLAAAEK</a> |
| 15.4  | 1641.872574 | -0.014402 | <a href="#">IEEANQVLQKWEK</a>   |
| 12.8  | 1641.857330 | 0.000842  | <a href="#">EPNSSAQIDIVISNK</a> |
| 10.1  | 1641.856201 | 0.001971  | <a href="#">QAWLWVCLPRGTR</a>   |

|     |             |           |                                    |
|-----|-------------|-----------|------------------------------------|
| 7.1 | 1641.844299 | 0.013873  | <a href="#">LLPGRSCCKPEGGR</a>     |
| 6.8 | 1641.858704 | -0.000532 | <a href="#">EGGGGAGTAAAVLGGWKR</a> |
| 4.8 | 1641.854828 | 0.003344  | <a href="#">CDKGNLYNFSKLK</a>      |
| 4.5 | 1641.847626 | 0.010546  | <a href="#">IPLMWKDTEYFK</a>       |
| 4.2 | 1641.868607 | -0.010435 | <a href="#">GSLSGLSQATHTAVVSK</a>  |
| 3.8 | 1640.859589 | 0.998583  | <a href="#">TPNFNMYVKKVEK</a>      |



MS/MS Fragmentation of **IDVVYNASNNELVR**

Found in **IPI00216587.9**, Tax\_Id=9606 Gene\_Symbol=RPS8 40S ribosomal protein S8

Match to Query 6126: 1745.939474 from(873.977013,2+)

Title: Elution from: 38.52 to 42.41 period: FD070412dMavril07.raw experiment: 1 cycles: 1 precIntensity: 557865.2 FinneganScanNumber: 2824

Data file D:\projecttemp\FD080412dM\FD070412dMavril07.msm

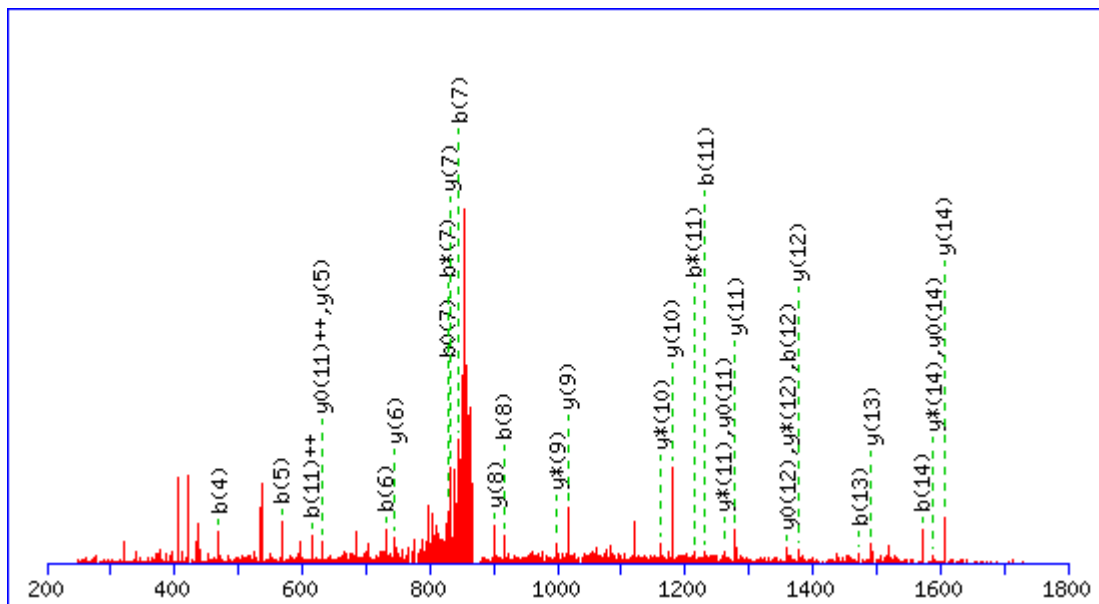

**Monoisotopic mass of neutral peptide Mr(calc):** 1745.931168

**Fixed modifications:** Carbamidomethyl (C)

**Variable modifications:**

**N-term :** Dimethyl (N-term)

**Ions Score:** 46 **Expect:** 0.012

**Matches (Bold Red):** 32/146 fragment ions using 89 most intense peaks

| #  | b           | b <sup>++</sup> | b*          | b <sup>*++</sup> | b <sup>0</sup> | b <sup>0++</sup> | Seq. | y           | y <sup>++</sup> | y*          | y <sup>*++</sup> | y <sup>0</sup> | y <sup>0++</sup> | #  |
|----|-------------|-----------------|-------------|------------------|----------------|------------------|------|-------------|-----------------|-------------|------------------|----------------|------------------|----|
| 1  | 142.122636  | 71.564956       |             |                  |                |                  | I    |             |                 |             |                  |                |                  | 15 |
| 2  | 255.206700  | 128.106988      |             |                  |                |                  | I    | 1605.823110 | 803.415193      | 1588.796561 | 794.901919       | 1587.812545    | 794.409911       | 14 |
| 3  | 370.233643  | 185.620459      |             |                  | 352.223078     | 176.615177       | D    | 1492.739046 | 746.873161      | 1475.712497 | 738.359887       | 1474.728481    | 737.867879       | 13 |
| 4  | 469.302057  | 235.154666      |             |                  | 451.291492     | 226.149384       | V    | 1377.712103 | 689.359690      | 1360.685554 | 680.846415       | 1359.701538    | 680.354407       | 12 |
| 5  | 568.370471  | 284.688874      |             |                  | 550.359906     | 275.683591       | V    | 1278.643689 | 639.825483      | 1261.617140 | 631.312208       | 1260.633124    | 630.820200       | 11 |
| 6  | 731.433800  | 366.220538      |             |                  | 713.423235     | 357.215256       | Y    | 1179.575275 | 590.291276      | 1162.548726 | 581.778001       | 1161.564710    | 581.285993       | 10 |
| 7  | 845.476727  | 423.242002      | 828.450178  | 414.728727       | 827.466162     | 414.236719       | N    | 1016.511946 | 508.759611      | 999.485397  | 500.246337       | 998.501381     | 499.754329       | 9  |
| 8  | 916.513841  | 458.760559      | 899.487292  | 450.247284       | 898.503276     | 449.755276       | A    | 902.469019  | 451.738148      | 885.442470  | 443.224873       | 884.458454     | 442.732865       | 8  |
| 9  | 1003.545869 | 502.276573      | 986.519320  | 493.763298       | 985.535304     | 493.271290       | S    | 831.431905  | 416.219591      | 814.405356  | 407.706316       | 813.421340     | 407.214308       | 7  |
| 10 | 1117.588796 | 559.298036      | 1100.562247 | 550.784762       | 1099.578231    | 550.292754       | N    | 744.399877  | 372.703577      | 727.373328  | 364.190302       | 726.389312     | 363.698294       | 6  |
| 11 | 1231.631723 | 616.319500      | 1214.605174 | 607.806225       | 1213.621158    | 607.314217       | N    | 630.356950  | 315.682113      | 613.330401  | 307.168839       | 612.346385     | 306.676831       | 5  |
| 12 | 1360.674316 | 680.840796      | 1343.647767 | 672.327522       | 1342.663751    | 671.835514       | E    | 516.314023  | 258.660650      | 499.287474  | 250.147375       | 498.303458     | 249.655367       | 4  |
| 13 | 1473.758380 | 737.382828      | 1456.731831 | 728.869554       | 1455.747815    | 728.377546       | L    | 387.271430  | 194.139353      | 370.244881  | 185.626078       |                |                  | 3  |
| 14 | 1572.826794 | 786.917035      | 1555.800245 | 778.403761       | 1554.816229    | 777.911753       | V    | 274.187366  | 137.597321      | 257.160817  | 129.084046       |                |                  | 2  |
| 15 |             |                 |             |                  |                |                  | R    | 175.118952  | 88.063114       | 158.092403  | 79.549839        |                |                  | 1  |

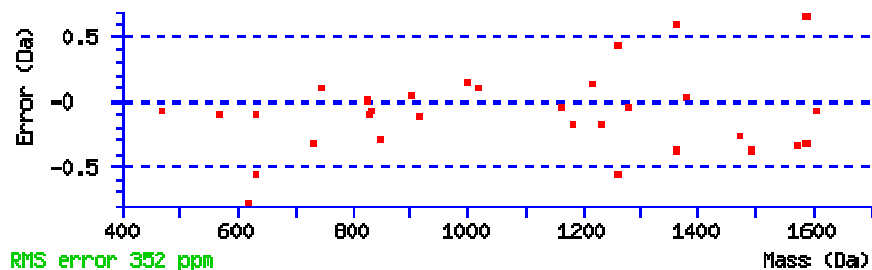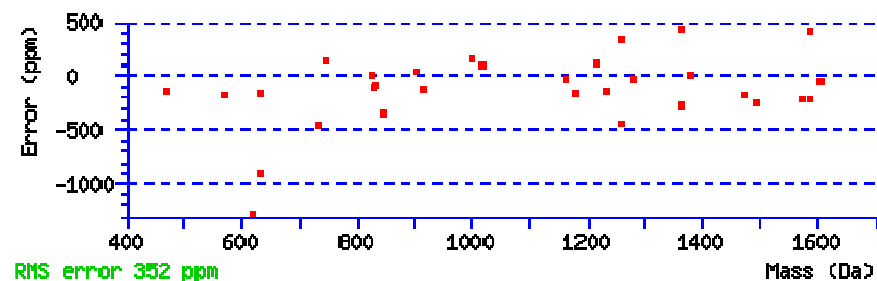

All matches to this query

| Score | Mr(calc):   | Delta    | Sequence                        |
|-------|-------------|----------|---------------------------------|
| 45.6  | 1745.931168 | 0.008306 | <a href="#">IIDVVYNASNNELVR</a> |
| 10.9  | 1743.915527 | 2.023947 | <a href="#">GILDYLDNISPOQIR</a> |
| 7.5   | 1745.924637 | 0.014837 | <a href="#">KAENKYAGGNPVCVR</a> |
| 5.3   | 1745.935211 | 0.004263 | <a href="#">DDPLVLYVYAAPQVR</a> |

|     |             |           |                                   |
|-----|-------------|-----------|-----------------------------------|
| 4.9 | 1745.932037 | 0.007437  | <a href="#">LHQCREVMLLTYK</a>     |
| 4.0 | 1745.953796 | -0.014322 | <a href="#">LLKYGMLLYQNYR</a>     |
| 3.9 | 1744.928085 | 1.011389  | <a href="#">DMGLVTPEAASLGTVIK</a> |
| 3.6 | 1745.927994 | 0.011480  | <a href="#">KRMQDLNLAMDALR</a>    |
| 3.5 | 1745.931183 | 0.008291  | <a href="#">IVIDFDSINSRPSQK</a>   |
| 2.9 | 1745.931152 | 0.008322  | <a href="#">EIAQYLLEKGADVNR</a>   |

MS/MS Fragmentation of **HIEDLLEATR**

Found in **IPI00001159.10**, Tax\_Id=9606 Gene\_Symbol=GCN1L1 Translational activator GCN1

Match to Query 5778: 1312.771106 from(657.392829,2+)

Title: Elution from: 48.62 to 52.59 period: FD070412dMavril01.raw experiment: 1 cycles: 1 precIntensity: 194438.9 FinneganScanNumber: 3297

Data file D:\projecttemp\FD080412dM\FD070412dMavril01.msm

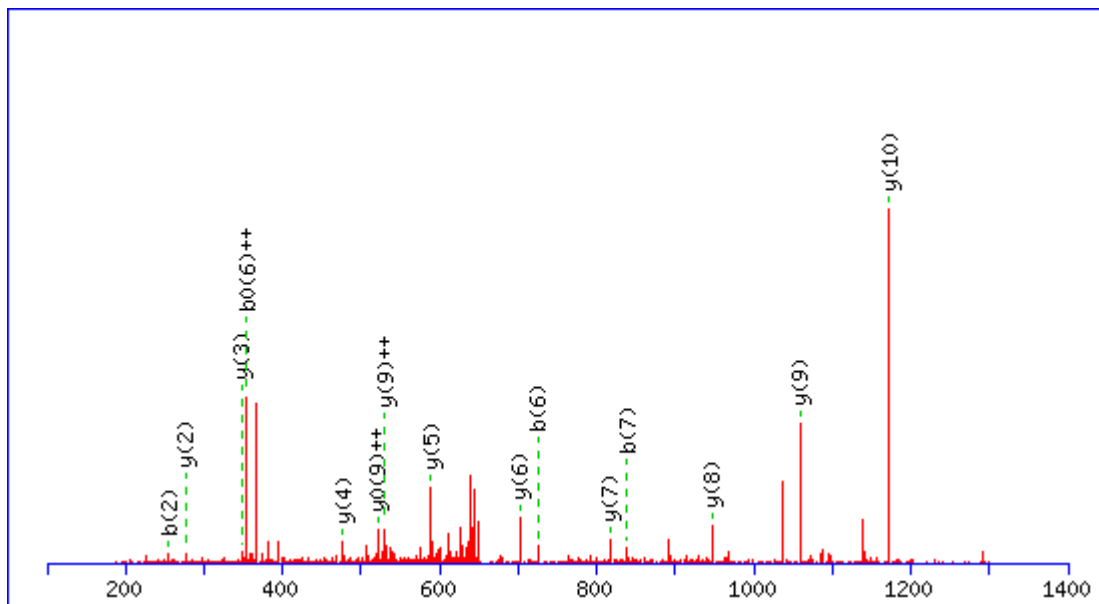

**Monoisotopic mass of neutral peptide Mr(calc):** 1312.760178

**Fixed modifications:** Carbamidomethyl (C)

**Variable modifications:**

**N-term :** Dimethyl (N-term)

**Ions Score:** 55 **Expect:** 0.00096

**Matches (Bold Red):** 15/92 fragment ions using 30 most intense peaks

| #  | b                 | b <sup>++</sup> | b <sup>0</sup> | b <sup>0++</sup>  | Seq. | y                  | y <sup>++</sup>   | y*          | y <sup>*++</sup> | y <sup>0</sup> | y <sup>0++</sup>  | #  |
|----|-------------------|-----------------|----------------|-------------------|------|--------------------|-------------------|-------------|------------------|----------------|-------------------|----|
| 1  | 142.122636        | 71.564956       |                |                   | I    |                    |                   |             |                  |                |                   | 11 |
| 2  | <b>255.206700</b> | 128.106988      |                |                   | I    | <b>1172.652130</b> | 586.829703        | 1155.625581 | 578.316429       | 1154.641565    | 577.824421        | 10 |
| 3  | 368.290764        | 184.649020      |                |                   | I    | <b>1059.568066</b> | <b>530.287671</b> | 1042.541517 | 521.774397       | 1041.557501    | <b>521.282389</b> | 9  |
| 4  | 497.333357        | 249.170316      | 479.322792     | 240.165034        | E    | <b>946.484002</b>  | 473.745639        | 929.457453  | 465.232365       | 928.473437     | 464.740357        | 8  |
| 5  | 612.360300        | 306.683788      | 594.349735     | 297.678506        | D    | <b>817.441409</b>  | 409.224343        | 800.414860  | 400.711068       | 799.430844     | 400.219060        | 7  |
| 6  | <b>725.444364</b> | 363.225820      | 707.433799     | <b>354.220538</b> | L    | <b>702.414466</b>  | 351.710871        | 685.387917  | 343.197597       | 684.403901     | 342.705589        | 6  |
| 7  | <b>838.528428</b> | 419.767852      | 820.517863     | 410.762570        | L    | <b>589.330402</b>  | 295.168839        | 572.303853  | 286.655565       | 571.319837     | 286.163557        | 5  |
| 8  | 967.571021        | 484.289149      | 949.560456     | 475.283866        | E    | <b>476.246338</b>  | 238.626807        | 459.219789  | 230.113532       | 458.235773     | 229.621524        | 4  |
| 9  | 1038.608135       | 519.807706      | 1020.597570    | 510.802423        | A    | <b>347.203745</b>  | 174.105510        | 330.177196  | 165.592236       | 329.193180     | 165.100228        | 3  |
| 10 | 1139.655814       | 570.331545      | 1121.645249    | 561.326263        | T    | <b>276.166631</b>  | 138.586953        | 259.140082  | 130.073679       | 258.156066     | 129.581671        | 2  |
| 11 |                   |                 |                |                   | R    | 175.118952         | 88.063114         | 158.092403  | 79.549839        |                |                   | 1  |

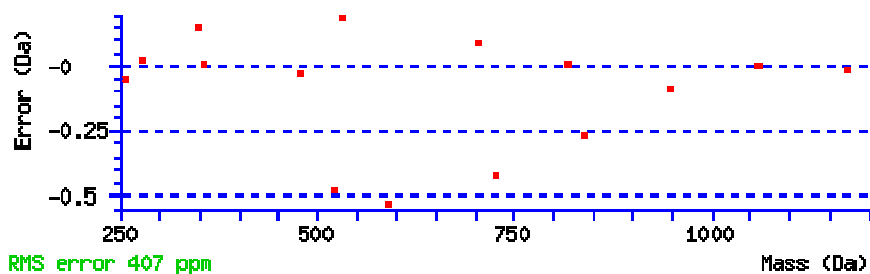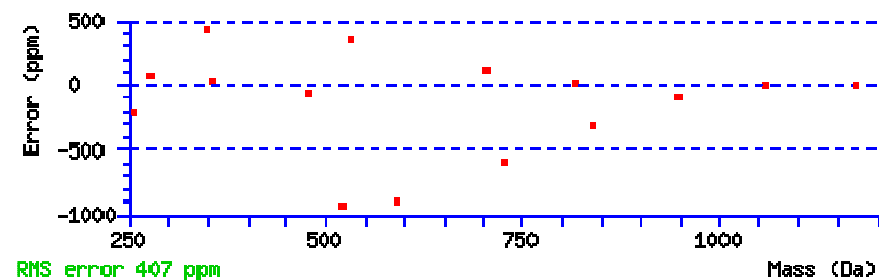

All matches to this query

| Score | Mr(calc):   | Delta     | Sequence                      |
|-------|-------------|-----------|-------------------------------|
| 55.0  | 1312.760178 | 0.010928  | <a href="#">IIEDLLEATR</a>    |
| 16.7  | 1312.771408 | -0.000302 | <a href="#">LILENRSRSPK</a>   |
| 14.7  | 1312.775436 | -0.004330 | <a href="#">IIEIDGQKKW</a>    |
| 10.8  | 1312.771408 | -0.000302 | <a href="#">LLILSAAGDERK</a>  |
| 6.0   | 1312.760178 | 0.010928  | <a href="#">ILENVEVKGEK</a>   |
| 5.8   | 1311.766266 | 1.004840  | <a href="#">PKIELPERFR</a>    |
| 5.8   | 1311.766266 | 1.004840  | <a href="#">PKIELPERFR</a>    |
| 5.3   | 1311.773499 | 0.997607  | <a href="#">VGIQGRLLKANTR</a> |

|     |             |          |                             |
|-----|-------------|----------|-----------------------------|
| 4.8 | 1312.760178 | 0.010928 | <a href="#">ILENVEVKGEK</a> |
| 4.2 | 1311.766281 | 1.004825 | <a href="#">HKLNKGVFGEK</a> |

---

MS/MS Fragmentation of **ILED SGFDEQQEFR**

Found in **IPI00220901.4**, Tax\_Id=9606 Gene\_Symbol=TBC1D4 TBC1D4 protein

Match to Query 6744: 1740.811876 from(871.413214,2+)

Title: Elution from: 35.11 to 39.00 period: FD070412dMavril02.raw experiment: 1 cycles: 1 precIntensity: 447559.1 FinneganScanNumber: 2412

Data file D:\projecttemp\FD080412dM\FD070412dMavril02.msm

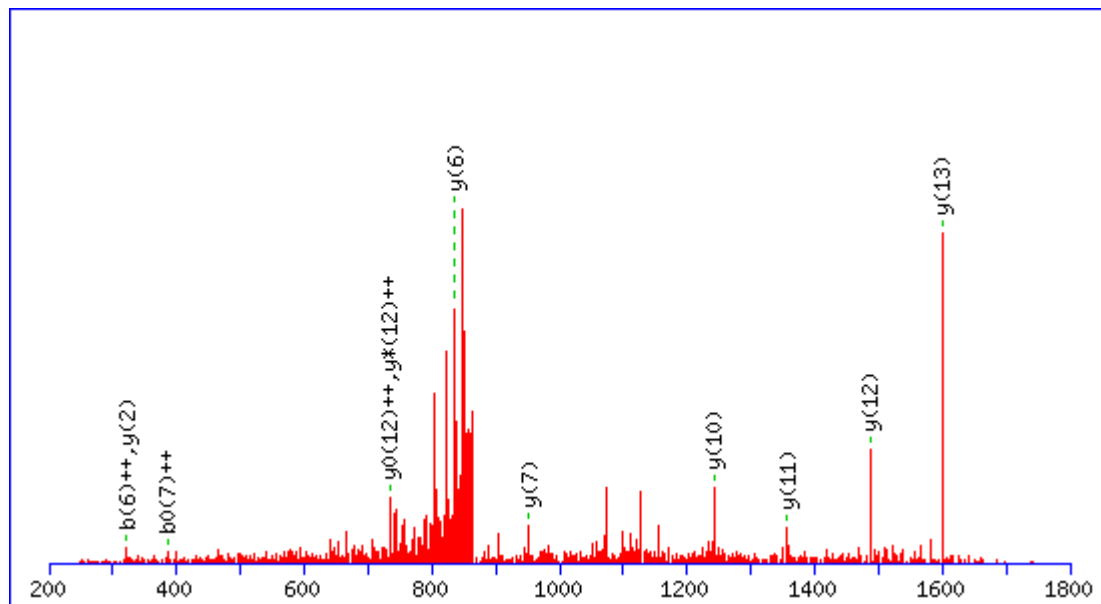

**Monoisotopic mass of neutral peptide Mr(calc):** 1739.800232

**Fixed modifications:** Carbamidomethyl (C)

**Variable modifications:**

**N-term :** Dimethyl (N-term)

**Ions Score:** 42 **Expect:** 0.01

**Matches (Bold Red):** 11/130 fragment ions using 34 most intense peaks

| #  | b           | b <sup>++</sup> | b*          | b <sup>*++</sup> | b <sup>0</sup> | b <sup>0++</sup> | Seq. | y           | y <sup>++</sup> | y*          | y <sup>*++</sup> | y <sup>0</sup> | y <sup>0++</sup> | #  |
|----|-------------|-----------------|-------------|------------------|----------------|------------------|------|-------------|-----------------|-------------|------------------|----------------|------------------|----|
| 1  | 142.122636  | 71.564956       |             |                  |                |                  | I    |             |                 |             |                  |                |                  | 14 |
| 2  | 255.206700  | 128.106988      |             |                  |                |                  | L    | 1599.692157 | 800.349717      | 1582.665608 | 791.836442       | 1581.681592    | 791.344434       | 13 |
| 3  | 384.249293  | 192.628285      |             |                  | 366.238728     | 183.623002       | E    | 1486.608093 | 743.807685      | 1469.581544 | 735.294410       | 1468.597528    | 734.802402       | 12 |
| 4  | 499.276236  | 250.141756      |             |                  | 481.265671     | 241.136474       | D    | 1357.565500 | 679.286388      | 1340.538951 | 670.773114       | 1339.554935    | 670.281106       | 11 |
| 5  | 586.308264  | 293.657770      |             |                  | 568.297699     | 284.652488       | S    | 1242.538557 | 621.772917      | 1225.512008 | 613.259642       | 1224.527992    | 612.767634       | 10 |
| 6  | 643.329728  | 322.168502      |             |                  | 625.319163     | 313.163220       | G    | 1155.506529 | 578.256903      | 1138.479980 | 569.743628       | 1137.495964    | 569.251620       | 9  |
| 7  | 790.398142  | 395.702709      |             |                  | 772.387577     | 386.697427       | F    | 1098.485065 | 549.746171      | 1081.458516 | 541.232896       | 1080.474500    | 540.740888       | 8  |
| 8  | 905.425085  | 453.216181      |             |                  | 887.414520     | 444.210898       | D    | 951.416651  | 476.211964      | 934.390102  | 467.698689       | 933.406086     | 467.206681       | 7  |
| 9  | 1034.467678 | 517.737477      |             |                  | 1016.457113    | 508.732195       | E    | 836.389708  | 418.698492      | 819.363159  | 410.185218       | 818.379143     | 409.693210       | 6  |
| 10 | 1162.526256 | 581.766766      | 1145.499707 | 573.253492       | 1144.515691    | 572.761484       | Q    | 707.347115  | 354.177196      | 690.320566  | 345.663921       | 689.336550     | 345.171913       | 5  |
| 11 | 1290.584834 | 645.796055      | 1273.558285 | 637.282781       | 1272.574269    | 636.790773       | Q    | 579.288537  | 290.147907      | 562.261988  | 281.634632       | 561.277972     | 281.142624       | 4  |
| 12 | 1419.627427 | 710.317352      | 1402.600878 | 701.804077       | 1401.616862    | 701.312069       | E    | 451.229959  | 226.118618      | 434.203410  | 217.605343       | 433.219394     | 217.113335       | 3  |
| 13 | 1566.695841 | 783.851559      | 1549.669292 | 775.338284       | 1548.685276    | 774.846276       | F    | 322.187366  | 161.597321      | 305.160817  | 153.084046       |                |                  | 2  |
| 14 |             |                 |             |                  |                |                  | R    | 175.118952  | 88.063114       | 158.092403  | 79.549839        |                |                  | 1  |

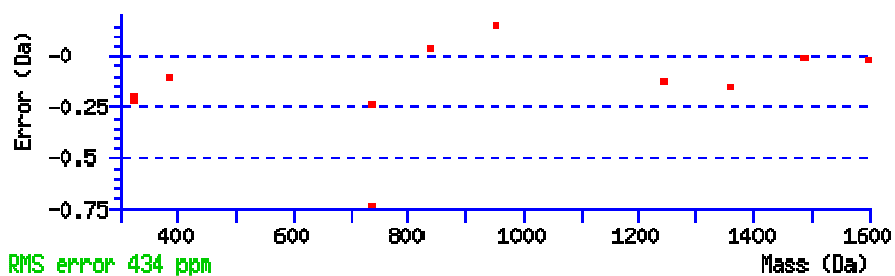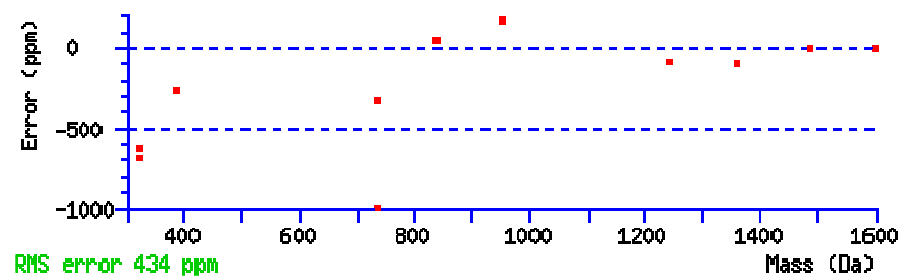

All matches to this query

| Score | Mr(calc):   | Delta     | Sequence                        |
|-------|-------------|-----------|---------------------------------|
| 42.1  | 1739.800232 | 1.011644  | <a href="#">ILED SGFDEQQEFR</a> |
| 6.0   | 1740.823990 | -0.012114 | <a href="#">AKEEQDDTVYMGK</a>   |
| 4.5   | 1739.814835 | 0.997041  | <a href="#">LQTQMDQDEGTKYR</a>  |
| 3.3   | 1739.809662 | 1.002214  | <a href="#">RVSRS HNVYCCFR</a>  |



MS/MS Fragmentation of **IQALQQADEAEDR**

Found in **IPI00010779.4**, Tax\_Id=9606 Gene\_Symbol=TPM4 Isoform 1 of Tropomyosin alpha-4 chain

Match to Query 5491: 1641.797048 from(821.905800,2+)

Title: Elution from: 24.33 to 28.21 period: FD070412dMavril07.raw experiment: 1 cycles: 1 precIntensity: 748031.6 FinneganScanNumber: 1653

Data file D:\projecttemp\FD080412dM\FD070412dMavril07.msm

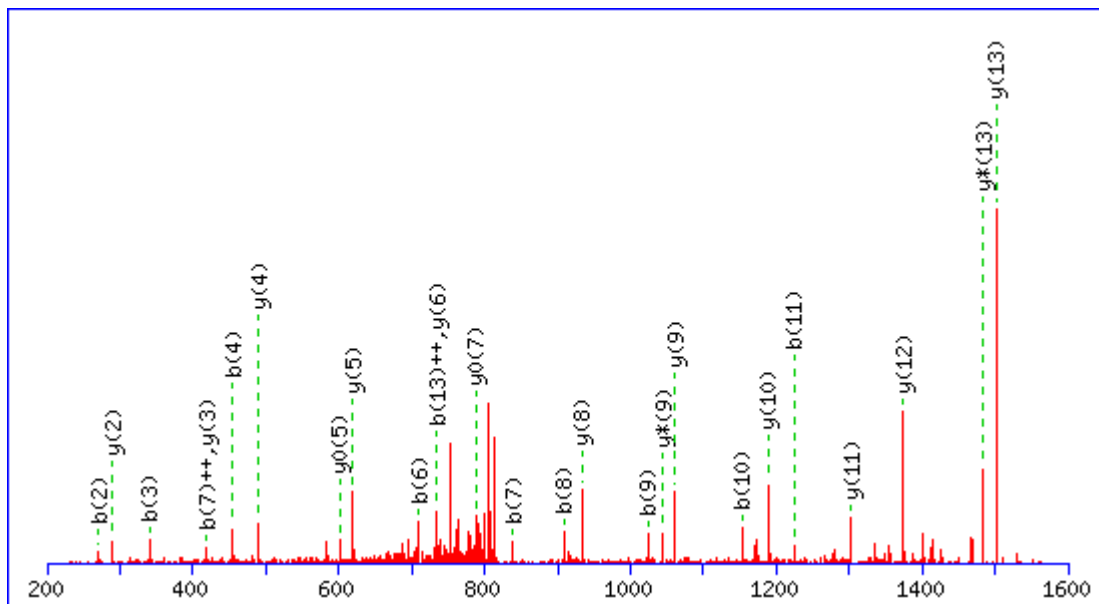

**Monoisotopic mass of neutral peptide Mr(calc):** 1641.795792

**Fixed modifications:** Carbamidomethyl (C)

**Variable modifications:**

**N-term :** Dimethyl (N-term)

**Ions Score:** 89 **Expect:** 3.2e-07

**Matches (Bold Red):** 26/136 fragment ions using 36 most intense peaks

| #  | b                  | b <sup>++</sup>   | b*          | b <sup>*++</sup> | b <sup>0</sup> | b <sup>0++</sup> | Seq. | y                  | y <sup>++</sup> | y*                 | y <sup>*++</sup> | y <sup>0</sup>    | y <sup>0++</sup> | #  |
|----|--------------------|-------------------|-------------|------------------|----------------|------------------|------|--------------------|-----------------|--------------------|------------------|-------------------|------------------|----|
| 1  | 142.122636         | 71.564956         |             |                  |                |                  | I    |                    |                 |                    |                  |                   |                  | 14 |
| 2  | <b>270.181214</b>  | 135.594245        | 253.154665  | 127.080971       |                |                  | Q    | <b>1501.687742</b> | 751.347509      | <b>1484.661193</b> | 742.834235       | 1483.677177       | 742.342227       | 13 |
| 3  | <b>341.218328</b>  | 171.112802        | 324.191779  | 162.599527       |                |                  | A    | <b>1373.629164</b> | 687.318220      | 1356.602615        | 678.804946       | 1355.618599       | 678.312938       | 12 |
| 4  | <b>454.302392</b>  | 227.654834        | 437.275843  | 219.141559       |                |                  | L    | <b>1302.592050</b> | 651.799663      | 1285.565501        | 643.286389       | 1284.581485       | 642.794381       | 11 |
| 5  | 582.360970         | 291.684123        | 565.334421  | 283.170849       |                |                  | Q    | <b>1189.507986</b> | 595.257631      | 1172.481437        | 586.744357       | 1171.497421       | 586.252349       | 10 |
| 6  | <b>710.419548</b>  | 355.713412        | 693.392999  | 347.200138       |                |                  | Q    | <b>1061.449408</b> | 531.228342      | <b>1044.422859</b> | 522.715068       | 1043.438843       | 522.223060       | 9  |
| 7  | <b>838.478126</b>  | <b>419.742701</b> | 821.451577  | 411.229427       |                |                  | Q    | <b>933.390830</b>  | 467.199053      | 916.364281         | 458.685779       | 915.380265        | 458.193771       | 8  |
| 8  | <b>909.515240</b>  | 455.261258        | 892.488691  | 446.747984       |                |                  | A    | 805.332252         | 403.169764      | 788.305703         | 394.656490       | <b>787.321687</b> | 394.164482       | 7  |
| 9  | <b>1024.542183</b> | 512.774729        | 1007.515634 | 504.261455       | 1006.531618    | 503.769447       | D    | <b>734.295138</b>  | 367.651207      | 717.268589         | 359.137933       | 716.284573        | 358.645925       | 6  |
| 10 | <b>1153.584776</b> | 577.296026        | 1136.558227 | 568.782752       | 1135.574211    | 568.290744       | E    | <b>619.268195</b>  | 310.137736      | 602.241646         | 301.624461       | <b>601.257630</b> | 301.132453       | 5  |
| 11 | <b>1224.621890</b> | 612.814583        | 1207.595341 | 604.301309       | 1206.611325    | 603.809301       | A    | <b>490.225602</b>  | 245.616439      | 473.199053         | 237.103165       | 472.215037        | 236.611157       | 4  |
| 12 | 1353.664483        | 677.335880        | 1336.637934 | 668.822605       | 1335.653918    | 668.330597       | E    | <b>419.188488</b>  | 210.097882      | 402.161939         | 201.584608       | 401.177923        | 201.092600       | 3  |
| 13 | 1468.691426        | <b>734.849351</b> | 1451.664877 | 726.336077       | 1450.680861    | 725.844069       | D    | <b>290.145895</b>  | 145.576585      | 273.119346         | 137.063311       | 272.135330        | 136.571303       | 2  |
| 14 |                    |                   |             |                  |                |                  | R    | 175.118952         | 88.063114       | 158.092403         | 79.549839        |                   |                  | 1  |

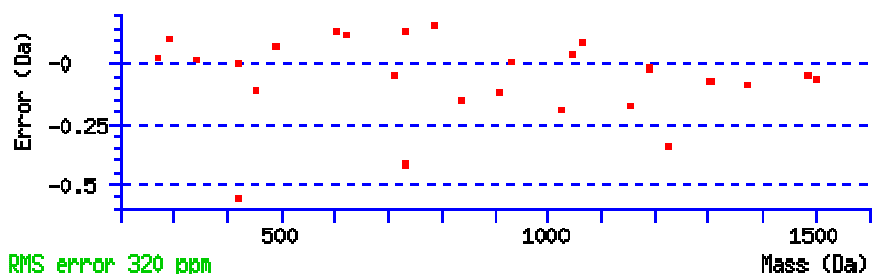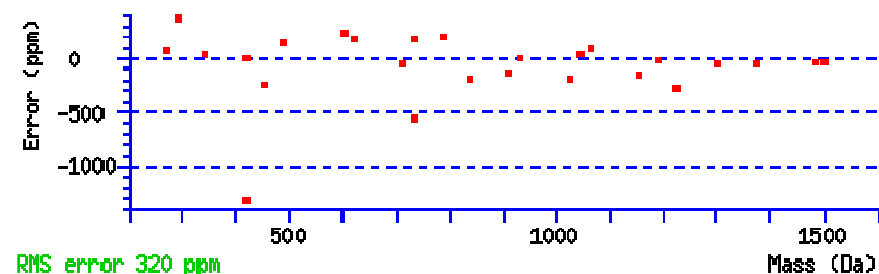

All matches to this query

| Score | Mr(calc):   | Delta     | Sequence                        |
|-------|-------------|-----------|---------------------------------|
| 89.0  | 1641.795792 | 0.001256  | <a href="#">IQALQQQADEAEDR</a>  |
| 28.6  | 1641.795807 | 0.001241  | <a href="#">IQVLQQQADDAEER</a>  |
| 6.1   | 1641.811081 | -0.014033 | <a href="#">WVHLDTEITNSSGR</a>  |
| 4.3   | 1641.785431 | 0.011617  | <a href="#">QALSCKMAVEYDR</a>   |
| 2.9   | 1641.800522 | -0.003474 | <a href="#">IMHPSSRSLQNSGGR</a> |

|     |             |          |                                 |
|-----|-------------|----------|---------------------------------|
| 1.1 | 1641.795776 | 0.001272 | <a href="#">AAEGKERPAEEDGGK</a> |
|-----|-------------|----------|---------------------------------|

MS/MS Fragmentation of **IQTQPGYANTLR**

Found in **IPI00022202.3**, Tax\_Id=9606 Gene\_Symbol=SLC25A3 Isoform A of Phosphate carrier protein, mitochondrial

Match to Query 4559: 1388.741476 from(695.378014,2+)

Title: Elution from: 25.13 to 29.00 period: FD070412dMavril07.raw experiment: 1 cycles: 1 precIntensity: 2261399.4 FinneganScanNumber: 1723

Data file D:\projecttemp\FD080412dM\FD070412dMavril07.msm

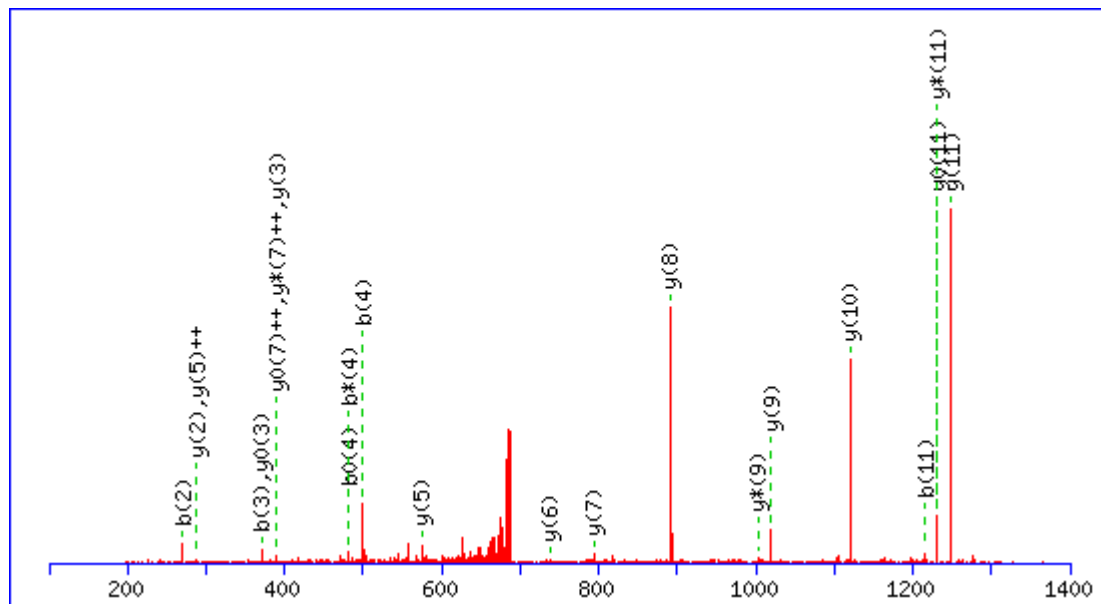

**Monoisotopic mass of neutral peptide Mr(calc):** 1388.741196

**Fixed modifications:** Carbamidomethyl (C)

**Variable modifications:**

**N-term :** Dimethyl (N-term)

**Ions Score:** 56 **Expect:** 0.0013

**Matches (Bold Red):** 22/122 fragment ions using 55 most intense peaks

| #  | b                  | b <sup>++</sup> | b*                | b <sup>*++</sup> | b <sup>0</sup>    | b <sup>0++</sup> | Seq. | y                  | y <sup>++</sup>   | y*                 | y <sup>*++</sup>  | y <sup>0</sup>     | y <sup>0++</sup>  | #  |
|----|--------------------|-----------------|-------------------|------------------|-------------------|------------------|------|--------------------|-------------------|--------------------|-------------------|--------------------|-------------------|----|
| 1  | 142.122636         | 71.564956       |                   |                  |                   |                  | I    |                    |                   |                    |                   |                    |                   | 12 |
| 2  | <b>270.181214</b>  | 135.594245      | 253.154665        | 127.080971       |                   |                  | Q    | <b>1248.633128</b> | 624.820202        | <b>1231.606579</b> | 616.306928        | <b>1230.622563</b> | 615.814920        | 11 |
| 3  | <b>371.228893</b>  | 186.118085      | 354.202344        | 177.604810       | 353.218328        | 177.112802       | T    | <b>1120.574550</b> | 560.790913        | 1103.548001        | 552.277639        | 1102.563985        | 551.785631        | 10 |
| 4  | <b>499.287471</b>  | 250.147374      | <b>482.260922</b> | 241.634099       | <b>481.276906</b> | 241.142091       | Q    | <b>1019.526871</b> | 510.267074        | <b>1002.500322</b> | 501.753799        | 1001.516306        | 501.261791        | 9  |
| 5  | 596.340235         | 298.673756      | 579.313686        | 290.160481       | 578.329670        | 289.668473       | P    | <b>891.468293</b>  | 446.237785        | 874.441744         | 437.724510        | 873.457728         | 437.232502        | 8  |
| 6  | 653.361699         | 327.184488      | 636.335150        | 318.671213       | 635.351134        | 318.179205       | G    | <b>794.415529</b>  | 397.711403        | 777.388980         | <b>389.198128</b> | 776.404964         | <b>388.706120</b> | 7  |
| 7  | 816.425028         | 408.716152      | 799.398479        | 400.202878       | 798.414463        | 399.710870       | Y    | <b>737.394065</b>  | 369.200671        | 720.367516         | 360.687396        | 719.383500         | 360.195388        | 6  |
| 8  | 887.462142         | 444.234709      | 870.435593        | 435.721435       | 869.451577        | 435.229427       | A    | <b>574.330736</b>  | <b>287.669006</b> | 557.304187         | 279.155731        | 556.320171         | 278.663723        | 5  |
| 9  | 1001.505069        | 501.256173      | 984.478520        | 492.742898       | 983.494504        | 492.250890       | N    | 503.293622         | 252.150449        | 486.267073         | 243.637174        | 485.283057         | 243.145166        | 4  |
| 10 | 1102.552748        | 551.780012      | 1085.526199       | 543.266738       | 1084.542183       | 542.774730       | T    | <b>389.250695</b>  | 195.128985        | 372.224146         | 186.615711        | <b>371.240130</b>  | 186.123703        | 3  |
| 11 | <b>1215.636812</b> | 608.322044      | 1198.610263       | 599.808770       | 1197.626247       | 599.316762       | L    | <b>288.203016</b>  | 144.605146        | 271.176467         | 136.091871        |                    |                   | 2  |
| 12 |                    |                 |                   |                  |                   |                  | R    | 175.118952         | 88.063114         | 158.092403         | 79.549839         |                    |                   | 1  |

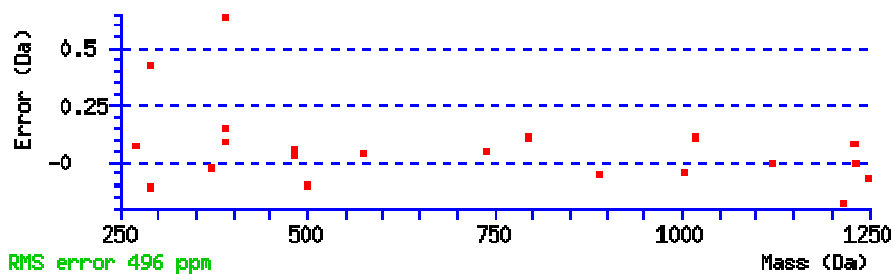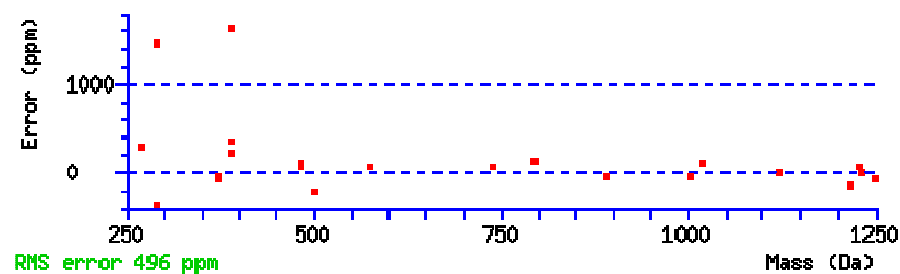

All matches to this query

| Score | Mr(calc):   | Delta     | Sequence                      |
|-------|-------------|-----------|-------------------------------|
| 55.7  | 1388.741196 | 0.000280  | <a href="#">IQTQPGYANTLR</a>  |
| 9.4   | 1388.733322 | 0.008154  | <a href="#">IQESLDLMQLR</a>   |
| 8.7   | 1388.748566 | -0.007090 | <a href="#">LQNEKWMNVK</a>    |
| 7.5   | 1388.739853 | 0.001623  | <a href="#">LVKEDEVVSSEK</a>  |
| 6.2   | 1388.738541 | 0.002935  | <a href="#">HVRQGGGAAGPVR</a> |
| 5.8   | 1388.755112 | -0.013636 | <a href="#">QELQEVVEFLK</a>   |
| 5.4   | 1388.748596 | -0.007120 | <a href="#">LHCYQTLTGIK</a>   |

|     |             |           |                              |
|-----|-------------|-----------|------------------------------|
| 4.8 | 1388.730652 | 0.010824  | <a href="#">LQSVREGCRTR</a>  |
| 3.8 | 1388.739807 | 0.001669  | <a href="#">IKKESEEDA EK</a> |
| 3.8 | 1388.744537 | -0.003061 | <a href="#">NLMNSLEQKIR</a>  |

MS/MS Fragmentation of **ISVYYNEATGGK**

Found in **IPI00011654.2**, Tax\_Id=9606 Gene\_Symbol=TUBB Tubulin beta chain

Match to Query 4675: 1328.667876 from(665.341214,2+)

Title: Elution from: 27.90 to 31.85 period: FD070412dMavril04.raw experiment: 1 cycles: 1 precIntensity: 811171.6 FinneganScanNumber: 1842

Data file D:\projecttemp\FD080412dM\FD070412dMavril04.msm

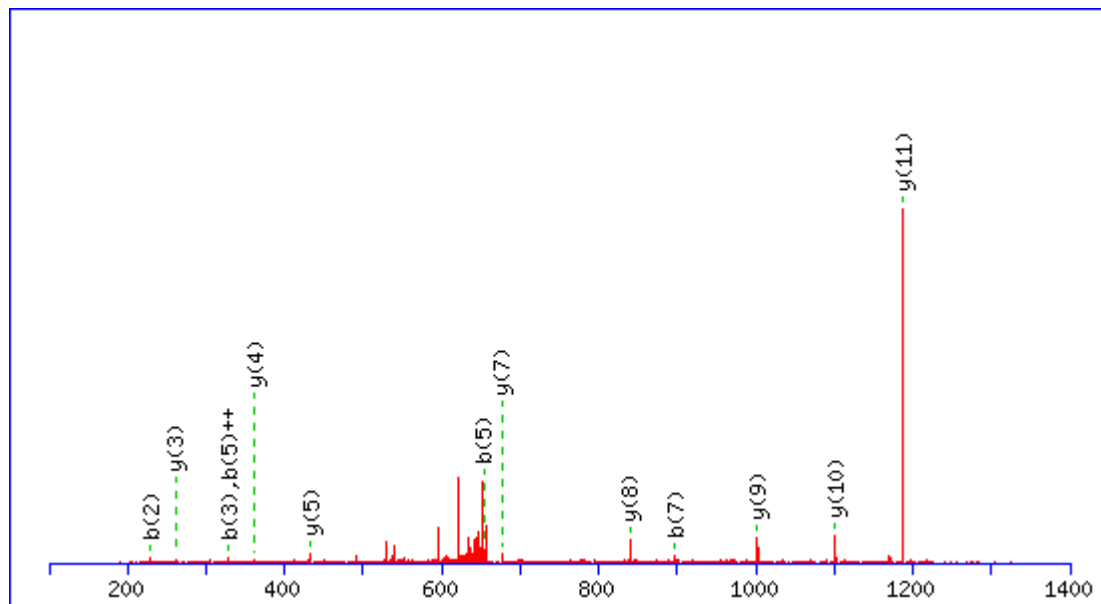

**Monoisotopic mass of neutral peptide Mr(calc):** 1328.661209

**Fixed modifications:** Carbamidomethyl (C)

**Variable modifications:**

**N-term :** Dimethyl (N-term)

**Ions Score:** 36 **Expect:** 0.066

**Matches (Bold Red):** 13/114 fragment ions using 45 most intense peaks

| #  | b                 | b <sup>++</sup>   | b*          | b <sup>*++</sup> | b <sup>0</sup> | b <sup>0++</sup> | Seq. | y                  | y <sup>++</sup> | y*          | y <sup>*++</sup> | y <sup>0</sup> | y <sup>0++</sup> | #  |
|----|-------------------|-------------------|-------------|------------------|----------------|------------------|------|--------------------|-----------------|-------------|------------------|----------------|------------------|----|
| 1  | 142.122636        | 71.564956         |             |                  |                |                  | I    |                    |                 |             |                  |                |                  | 12 |
| 2  | <b>229.154664</b> | 115.080970        |             |                  | 211.144099     | 106.075687       | S    | <b>1188.553145</b> | 594.780210      | 1171.526596 | 586.266936       | 1170.542580    | 585.774928       | 11 |
| 3  | <b>328.223078</b> | 164.615177        |             |                  | 310.212513     | 155.609894       | V    | <b>1101.521117</b> | 551.264196      | 1084.494568 | 542.750922       | 1083.510552    | 542.258914       | 10 |
| 4  | 491.286407        | 246.146841        |             |                  | 473.275842     | 237.141559       | Y    | <b>1002.452703</b> | 501.729989      | 985.426154  | 493.216715       | 984.442138     | 492.724707       | 9  |
| 5  | <b>654.349736</b> | <b>327.678506</b> |             |                  | 636.339171     | 318.673224       | Y    | <b>839.389374</b>  | 420.198325      | 822.362825  | 411.685050       | 821.378809     | 411.193042       | 8  |
| 6  | 768.392663        | 384.699970        | 751.366114  | 376.186695       | 750.382098     | 375.694687       | N    | <b>676.326045</b>  | 338.666660      | 659.299496  | 330.153386       | 658.315480     | 329.661378       | 7  |
| 7  | <b>897.435256</b> | 449.221266        | 880.408707  | 440.707991       | 879.424691     | 440.215983       | E    | 562.283118         | 281.645197      | 545.256569  | 273.131922       | 544.272553     | 272.639914       | 6  |
| 8  | 968.472370        | 484.739823        | 951.445821  | 476.226548       | 950.461805     | 475.734540       | A    | <b>433.240525</b>  | 217.123900      | 416.213976  | 208.610626       | 415.229960     | 208.118618       | 5  |
| 9  | 1069.520049       | 535.263663        | 1052.493500 | 526.750388       | 1051.509484    | 526.258380       | T    | <b>362.203411</b>  | 181.605343      | 345.176862  | 173.092069       | 344.192846     | 172.600061       | 4  |
| 10 | 1126.541513       | 563.774394        | 1109.514964 | 555.261120       | 1108.530948    | 554.769112       | G    | <b>261.155732</b>  | 131.081504      | 244.129183  | 122.568229       |                |                  | 3  |
| 11 | 1183.562977       | 592.285126        | 1166.536428 | 583.771852       | 1165.552412    | 583.279844       | G    | 204.134268         | 102.570772      | 187.107719  | 94.057497        |                |                  | 2  |
| 12 |                   |                   |             |                  |                |                  | K    | 147.112804         | 74.060040       | 130.086255  | 65.546765        |                |                  | 1  |

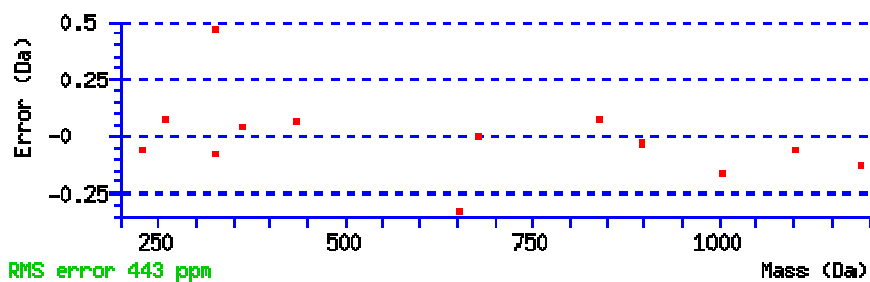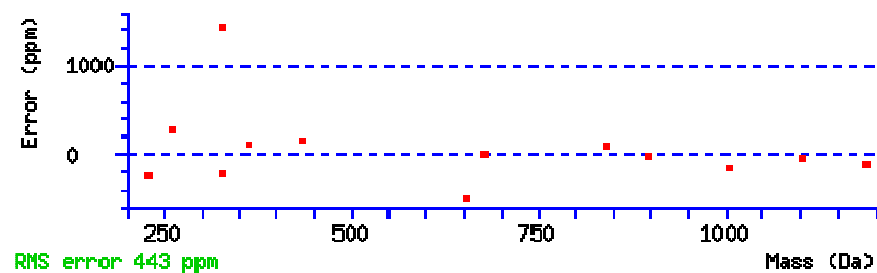

All matches to this query

| Score | Mr(calc):   | Delta     | Sequence                     |
|-------|-------------|-----------|------------------------------|
| 35.9  | 1328.661209 | 0.006667  | <a href="#">ISVYYNEATGGK</a> |
| 3.1   | 1328.665939 | 0.001937  | <a href="#">FLNVFMSGRSR</a>  |
| 1.5   | 1328.668610 | -0.000734 | <a href="#">LCYITLDFEK</a>   |



MS/MS Fragmentation of **LCTSATESEVAR**

Found in **IPI00013847.4**, Tax\_Id=9606 Gene\_Symbol=UQCRC1 Cytochrome b-c1 complex subunit 1, mitochondrial

Match to Query 4405: 1350.651804 from(676.333178,2+)

Title: Elution from: 20.62 to 24.47 period: FD070412dMavril05.raw experiment: 1 cycles: 1 precIntensity: 327309.3 FinneganScanNumber: 1226

Data file D:\projecttemp\FD080412dM\FD070412dMavril05.msm

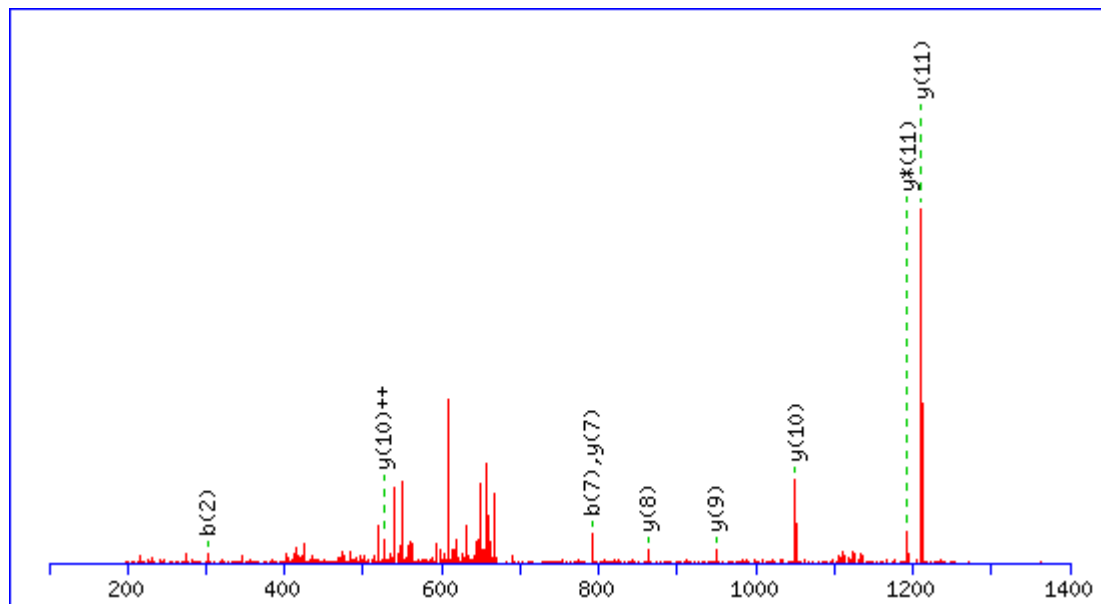

**Monoisotopic mass of neutral peptide Mr(calc):** 1350.644913

**Fixed modifications:** Carbamidomethyl (C)

**Variable modifications:**

**N-term :** Dimethyl (N-term)

**Ions Score:** 29 **Expect:** 0.26

**Matches (Bold Red):** 9/100 fragment ions using 24 most intense peaks

| #  | b                 | b <sup>++</sup> | b <sup>0</sup> | b <sup>0++</sup> | Seq. | y                  | y <sup>++</sup>   | y*                 | y <sup>*++</sup> | y <sup>0</sup> | y <sup>0++</sup> | #  |
|----|-------------------|-----------------|----------------|------------------|------|--------------------|-------------------|--------------------|------------------|----------------|------------------|----|
| 1  | 142.122636        | 71.564956       |                |                  | L    |                    |                   |                    |                  |                |                  | 12 |
| 2  | <b>302.153285</b> | 151.580280      |                |                  | C    | <b>1210.536843</b> | 605.772060        | <b>1193.510294</b> | 597.258785       | 1192.526278    | 596.766777       | 11 |
| 3  | 403.200964        | 202.104120      | 385.190399     | 193.098838       | T    | <b>1050.506194</b> | <b>525.756735</b> | 1033.479645        | 517.243461       | 1032.495629    | 516.751453       | 10 |
| 4  | 490.232992        | 245.620134      | 472.222427     | 236.614852       | S    | <b>949.458515</b>  | 475.232896        | 932.431966         | 466.719621       | 931.447950     | 466.227613       | 9  |
| 5  | 561.270106        | 281.138691      | 543.259541     | 272.133409       | A    | <b>862.426487</b>  | 431.716881        | 845.399938         | 423.203607       | 844.415922     | 422.711599       | 8  |
| 6  | 662.317785        | 331.662531      | 644.307220     | 322.657248       | T    | <b>791.389373</b>  | 396.198325        | 774.362824         | 387.685050       | 773.378808     | 387.193042       | 7  |
| 7  | <b>791.360378</b> | 396.183827      | 773.349813     | 387.178545       | E    | 690.341694         | 345.674485        | 673.315145         | 337.161210       | 672.331129     | 336.669202       | 6  |
| 8  | 878.392406        | 439.699841      | 860.381841     | 430.694559       | S    | 561.299101         | 281.153188        | 544.272552         | 272.639914       | 543.288536     | 272.147906       | 5  |
| 9  | 1007.434999       | 504.221138      | 989.424434     | 495.215855       | E    | 474.267073         | 237.637174        | 457.240524         | 229.123900       | 456.256508     | 228.631892       | 4  |
| 10 | 1106.503413       | 553.755345      | 1088.492848    | 544.750062       | V    | 345.224480         | 173.115878        | 328.197931         | 164.602603       |                |                  | 3  |
| 11 | 1177.540527       | 589.273902      | 1159.529962    | 580.268619       | A    | 246.156066         | 123.581671        | 229.129517         | 115.068396       |                |                  | 2  |
| 12 |                   |                 |                |                  | R    | 175.118952         | 88.063114         | 158.092403         | 79.549839        |                |                  | 1  |

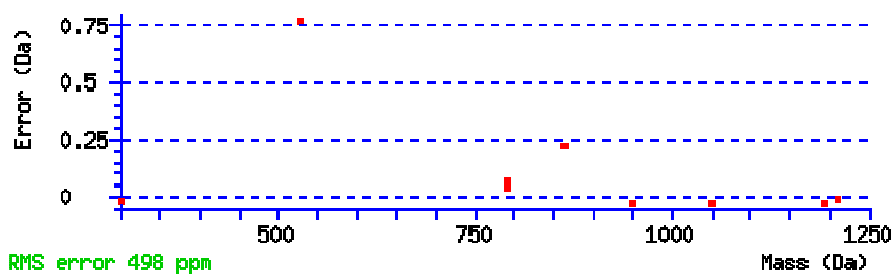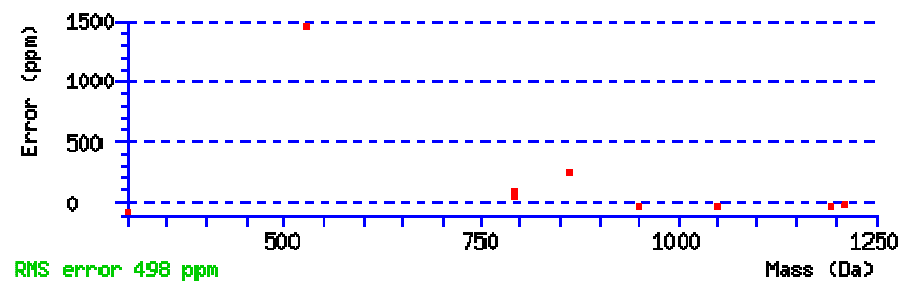

All matches to this query

| Score | Mr(calc):   | Delta    | Sequence                      |
|-------|-------------|----------|-------------------------------|
| 29.4  | 1350.644913 | 0.006891 | <a href="#">LCTSATESEVAR</a>  |
| 6.7   | 1350.644882 | 0.006922 | <a href="#">LMEESSTNREK</a>   |
| 4.8   | 1348.654404 | 1.997400 | <a href="#">SLATSCPEELSK</a>  |
| 1.9   | 1349.642258 | 1.009546 | <a href="#">NSEAASETQTKGK</a> |
| 1.8   | 1349.647629 | 1.004175 | <a href="#">WEQAHAHTASGK</a>  |
| 0.9   | 1349.650543 | 1.001261 | <a href="#">IILPACMDMVR</a>   |
| 0.8   | 1350.644928 | 0.006876 | <a href="#">LCTSVTESEVAR</a>  |

|     |             |          |                              |
|-----|-------------|----------|------------------------------|
| 0.3 | 1350.638397 | 0.013407 | <a href="#">LCAICGDRSSGK</a> |
|-----|-------------|----------|------------------------------|

---

MS/MS Fragmentation of **LEPEEQNR**

Found in **IPI00307783.9**, Tax\_Id=9606 Gene\_Symbol=WHSC1L1 Isoform 3 of Histone-lysine N-methyltransferase NSD3

Match to Query 3670: 1013.479652 from(507.747102,2+)

Title: Elution from: 26.69 to 30.67 period: FD070412dMavril03.raw experiment: 1 cycles: 1 precIntensity: 40775196.6 FinneganScanNumber: 1776

Data file D:\projecttemp\FD080412dM\FD070412dMavril03.msm

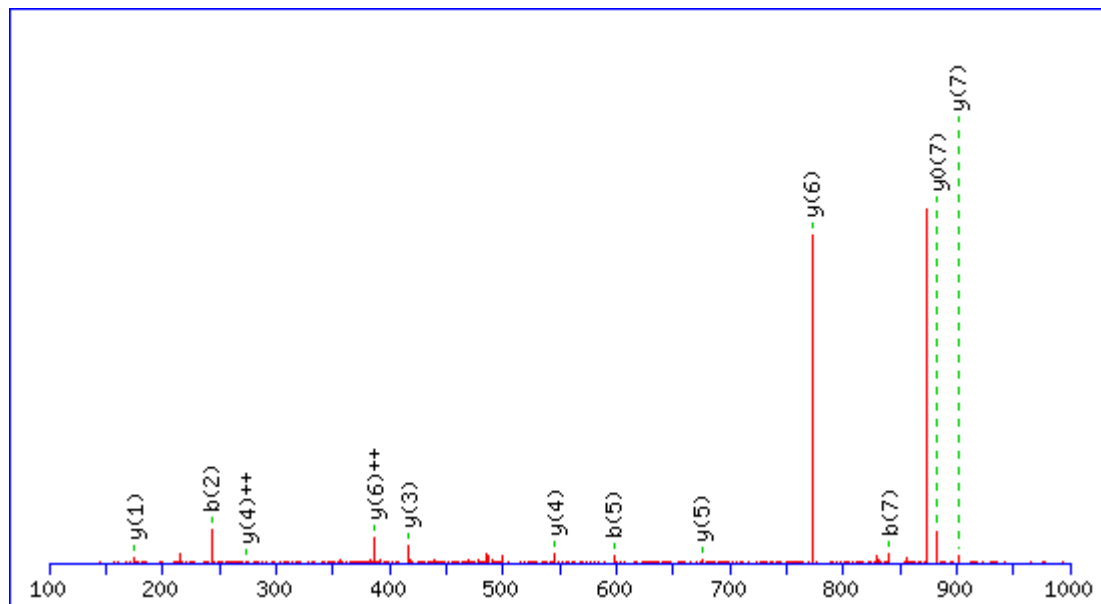

**Monoisotopic mass of neutral peptide Mr(calc):** 1013.477753

**Fixed modifications:** Carbamidomethyl (C)

**Ions Score:** 29 **Expect:** 0.13

**Matches (Bold Red):** 12/66 fragment ions using 37 most intense peaks

| # | b                 | b <sup>++</sup> | b <sup>*</sup> | b <sup>*++</sup> | b <sup>0</sup> | b <sup>0++</sup> | Seq. | y                 | y <sup>++</sup>   | y <sup>*</sup> | y <sup>*++</sup> | y <sup>0</sup>    | y <sup>0++</sup> | # |
|---|-------------------|-----------------|----------------|------------------|----------------|------------------|------|-------------------|-------------------|----------------|------------------|-------------------|------------------|---|
| 1 | 114.091340        | 57.549308       |                |                  |                |                  | L    |                   |                   |                |                  |                   |                  | 8 |
| 2 | <b>243.133933</b> | 122.070605      |                |                  | 225.123368     | 113.065322       | E    | <b>901.401000</b> | 451.204138        | 884.374451     | 442.690864       | <b>883.390435</b> | 442.198856       | 7 |
| 3 | 340.186697        | 170.596987      |                |                  | 322.176132     | 161.591704       | P    | <b>772.358407</b> | <b>386.682842</b> | 755.331858     | 378.169567       | 754.347842        | 377.677559       | 6 |
| 4 | 469.229290        | 235.118283      |                |                  | 451.218725     | 226.113001       | E    | <b>675.305643</b> | 338.156460        | 658.279094     | 329.643185       | 657.295078        | 329.151177       | 5 |
| 5 | <b>598.271883</b> | 299.639580      |                |                  | 580.261318     | 290.634297       | E    | <b>546.263050</b> | <b>273.635163</b> | 529.236501     | 265.121889       | 528.252485        | 264.629881       | 4 |
| 6 | 726.330461        | 363.668869      | 709.303912     | 355.155594       | 708.319896     | 354.663586       | Q    | <b>417.220457</b> | 209.113867        | 400.193908     | 200.600592       |                   |                  | 3 |
| 7 | <b>840.373388</b> | 420.690332      | 823.346839     | 412.177058       | 822.362823     | 411.685050       | N    | 289.161879        | 145.084577        | 272.135330     | 136.571303       |                   |                  | 2 |
| 8 |                   |                 |                |                  |                |                  | R    | <b>175.118952</b> | 88.063114         | 158.092403     | 79.549840        |                   |                  | 1 |

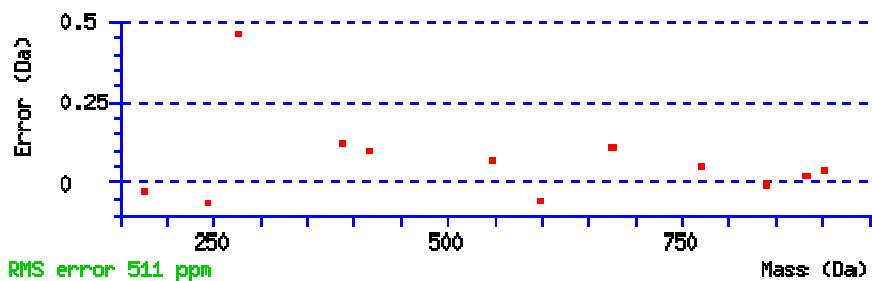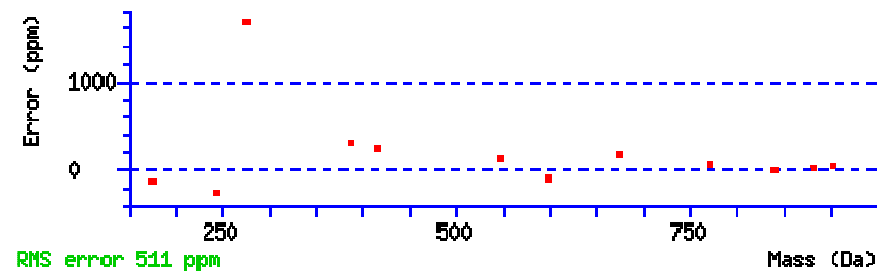

#### All matches to this query

| Score | Mr(calc):   | Delta     | Sequence                     |
|-------|-------------|-----------|------------------------------|
| 29.4  | 1013.477753 | 0.001899  | <a href="#">LEPEEQNR</a>     |
| 6.5   | 1013.489014 | -0.009362 | <a href="#">GSGGAAGAPGER</a> |
| 5.4   | 1012.472153 | 1.007499  | <a href="#">MAGFGAMEK</a>    |
| 4.8   | 1013.485184 | -0.005532 | <a href="#">LTLHDLCD</a>     |
| 4.4   | 1013.485168 | -0.005516 | <a href="#">ELPGCPEGK</a>    |
| 2.5   | 1013.489014 | -0.009362 | <a href="#">DDADLPRGR</a>    |
| 2.3   | 1013.482681 | -0.003029 | <a href="#">PKCCFFK</a>      |
| 1.4   | 1013.488998 | -0.009346 | <a href="#">GKDANPQER</a>    |
| 1.0   | 1012.468628 | 1.011024  | <a href="#">SPGHSTGSQR</a>   |
| 0.2   | 1012.475525 | 1.004127  | <a href="#">LLASMMCK</a>     |

MS/MS Fragmentation of **LIQNLDANHDGR**

Found in **IPI00062120.1**, Tax\_Id=9606 Gene\_Symbol=S100A16 Protein S100-A16

Match to Query 4841: 1393.711454 from(697.863003,2+)

Title: Elution from: 19.78 to 23.62 period: FD070412dMavril06.raw experiment: 1 cycles: 1 precIntensity: 177704.1 FinneganScanNumber: 1177

Data file D:\projecttemp\FD080412dM\FD070412dMavril06.msm

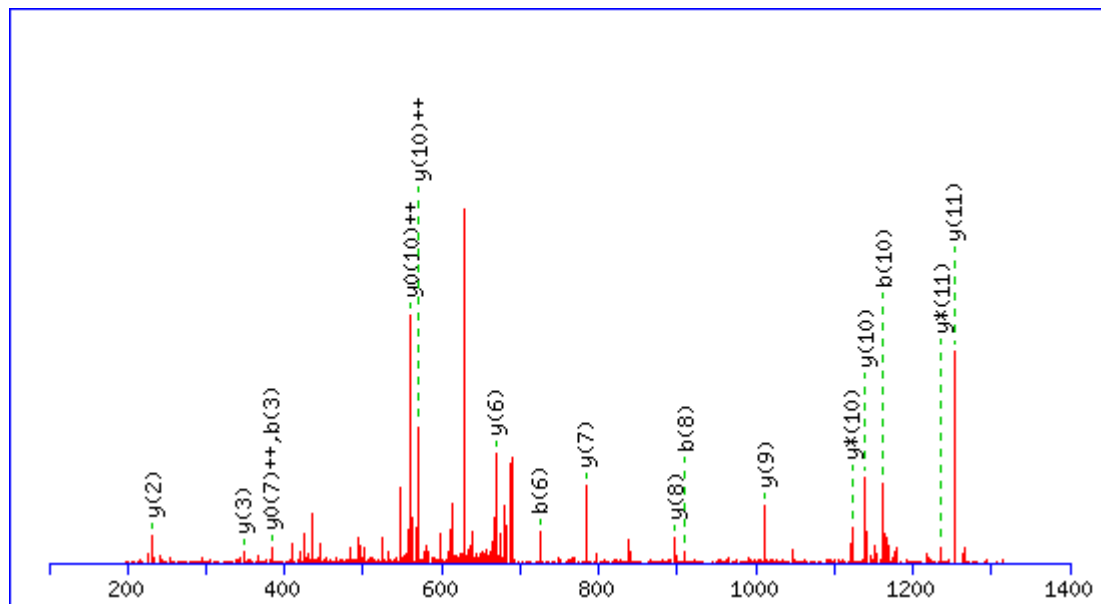

**Monoisotopic mass of neutral peptide Mr(calc):** 1392.710953

**Fixed modifications:** Carbamidomethyl (C)

**Variable modifications:**

**N-term :** Dimethyl (N-term)

**Ions Score:** 53 **Expect:** 0.0018

**Matches (Bold Red):** 17/114 fragment ions using 46 most intense peaks

| #  | b           | b <sup>++</sup> | b*          | b <sup>*++</sup> | b <sup>0</sup> | b <sup>0++</sup> | Seq. | y           | y <sup>++</sup> | y*          | y <sup>*++</sup> | y <sup>0</sup> | y <sup>0++</sup> | #  |
|----|-------------|-----------------|-------------|------------------|----------------|------------------|------|-------------|-----------------|-------------|------------------|----------------|------------------|----|
| 1  | 142.122636  | 71.564956       |             |                  |                |                  | L    |             |                 |             |                  |                |                  | 12 |
| 2  | 255.206700  | 128.106988      |             |                  |                |                  | I    | 1252.602888 | 626.805082      | 1235.576339 | 618.291808       | 1234.592323    | 617.799799       | 11 |
| 3  | 383.265278  | 192.136277      | 366.238729  | 183.623003       |                |                  | Q    | 1139.518824 | 570.263050      | 1122.492275 | 561.749775       | 1121.508259    | 561.257767       | 10 |
| 4  | 497.308205  | 249.157741      | 480.281656  | 240.644466       |                |                  | N    | 1011.460246 | 506.233761      | 994.433697  | 497.720486       | 993.449681     | 497.228478       | 9  |
| 5  | 610.392269  | 305.699773      | 593.365720  | 297.186498       |                |                  | L    | 897.417319  | 449.212297      | 880.390770  | 440.699023       | 879.406754     | 440.207015       | 8  |
| 6  | 725.419212  | 363.213244      | 708.392663  | 354.699970       | 707.408647     | 354.207962       | D    | 784.333255  | 392.670265      | 767.306706  | 384.156991       | 766.322690     | 383.664983       | 7  |
| 7  | 796.456326  | 398.731801      | 779.429777  | 390.218526       | 778.445761     | 389.726518       | A    | 669.306312  | 335.156794      | 652.279763  | 326.643519       | 651.295747     | 326.151511       | 6  |
| 8  | 910.499253  | 455.753265      | 893.472704  | 447.239990       | 892.488688     | 446.747982       | N    | 598.269198  | 299.638237      | 581.242649  | 291.124962       | 580.258633     | 290.632954       | 5  |
| 9  | 1047.558165 | 524.282720      | 1030.531616 | 515.769446       | 1029.547600    | 515.277438       | H    | 484.226271  | 242.616773      | 467.199722  | 234.103499       | 466.215706     | 233.611491       | 4  |
| 10 | 1162.585108 | 581.796192      | 1145.558559 | 573.282918       | 1144.574543    | 572.790909       | D    | 347.167359  | 174.087317      | 330.140810  | 165.574043       | 329.156794     | 165.082035       | 3  |
| 11 | 1219.606572 | 610.306924      | 1202.580023 | 601.793650       | 1201.596007    | 601.301641       | G    | 232.140416  | 116.573846      | 215.113867  | 108.060571       |                |                  | 2  |
| 12 |             |                 |             |                  |                |                  | R    | 175.118952  | 88.063114       | 158.092403  | 79.549839        |                |                  | 1  |

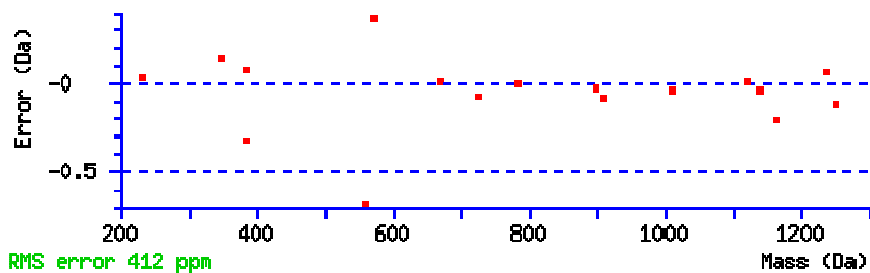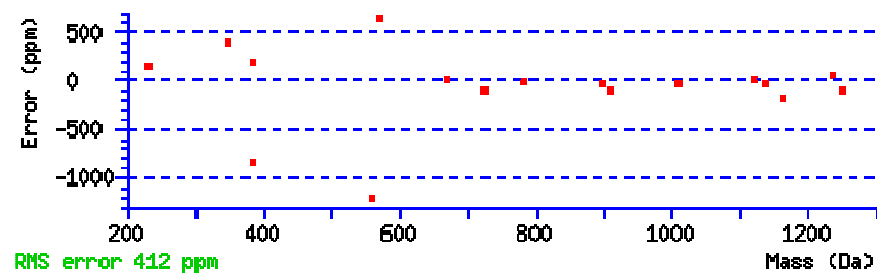

All matches to this query

| Score | Mr(calc):   | Delta    | Sequence                          |
|-------|-------------|----------|-----------------------------------|
| 52.6  | 1392.710953 | 1.000501 | <a href="#">LIQNLDANHDGR</a>      |
| 8.9   | 1392.710999 | 1.000455 | <a href="#">LGAPGGGGGGGGPELGR</a> |
| 5.7   | 1393.698975 | 0.012479 | <a href="#">EKGELARWDYK</a>       |
| 5.5   | 1392.703751 | 1.007703 | <a href="#">YLYSAVDGQPPR</a>      |
| 3.2   | 1391.715881 | 1.995573 | <a href="#">WSPPEVLMYSK</a>       |

MS/MS Fragmentation of **LQAVTDDHIR**

Found in **IPI00219910.2**, Tax\_Id=9606 Gene\_Symbol=- 22 kDa protein

Match to Query 4161: 1194.641486 from(598.328019,2+)

Title: Elution from: 21.35 to 25.24 period: FD070412dMavril06.raw experiment: 1 cycles: 1 precIntensity: 270267.0 FinneganScanNumber: 1285

Data file D:\projecttemp\FD080412dM\FD070412dMavril06.msm

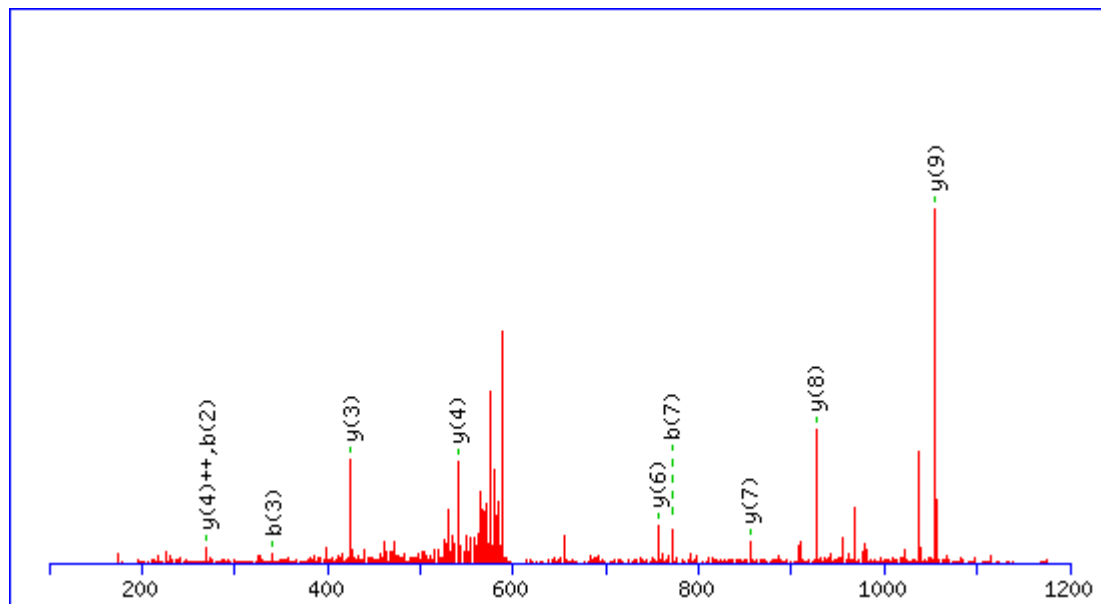

**Monoisotopic mass of neutral peptide Mr(calc):** 1194.635681

**Fixed modifications:** Carbamidomethyl (C)

**Variable modifications:**

**N-term :** Dimethyl (N-term)

**Ions Score:** 46 **Expect:** 0.0086

**Matches (Bold Red):** 10/92 fragment ions using 16 most intense peaks



| #  | b                 | b <sup>++</sup> | b*          | b <sup>*++</sup> | b <sup>0</sup> | b <sup>0++</sup> | Seq. | y                  | y <sup>++</sup>   | y*          | y <sup>*++</sup> | y <sup>0</sup> | y <sup>0++</sup> | #  |
|----|-------------------|-----------------|-------------|------------------|----------------|------------------|------|--------------------|-------------------|-------------|------------------|----------------|------------------|----|
| 1  | 142.122636        | 71.564956       |             |                  |                |                  | L    |                    |                   |             |                  |                |                  | 10 |
| 2  | <b>270.181214</b> | 135.594245      | 253.154665  | 127.080971       |                |                  | Q    | <b>1054.527599</b> | 527.767438        | 1037.501050 | 519.254163       | 1036.517034    | 518.762155       | 9  |
| 3  | <b>341.218328</b> | 171.112802      | 324.191779  | 162.599527       |                |                  | A    | <b>926.469021</b>  | 463.738148        | 909.442472  | 455.224874       | 908.458456     | 454.732866       | 8  |
| 4  | 440.286742        | 220.647009      | 423.260193  | 212.133735       |                |                  | V    | <b>855.431907</b>  | 428.219591        | 838.405358  | 419.706317       | 837.421342     | 419.214309       | 7  |
| 5  | 541.334421        | 271.170849      | 524.307872  | 262.657574       | 523.323856     | 262.165566       | T    | <b>756.363493</b>  | 378.685384        | 739.336944  | 370.172110       | 738.352928     | 369.680102       | 6  |
| 6  | 656.361364        | 328.684320      | 639.334815  | 320.171045       | 638.350799     | 319.679037       | D    | 655.315814         | 328.161545        | 638.289265  | 319.648270       | 637.305249     | 319.156262       | 5  |
| 7  | <b>771.388307</b> | 386.197791      | 754.361758  | 377.684517       | 753.377742     | 377.192509       | D    | <b>540.288871</b>  | <b>270.648074</b> | 523.262322  | 262.134799       | 522.278306     | 261.642791       | 4  |
| 8  | 908.447219        | 454.727247      | 891.420670  | 446.213973       | 890.436654     | 445.721965       | H    | <b>425.261928</b>  | 213.134602        | 408.235379  | 204.621327       |                |                  | 3  |
| 9  | 1021.531283       | 511.269279      | 1004.504734 | 502.756005       | 1003.520718    | 502.263997       | I    | 288.203016         | 144.605146        | 271.176467  | 136.091871       |                |                  | 2  |
| 10 |                   |                 |             |                  |                |                  | R    | 175.118952         | 88.063114         | 158.092403  | 79.549839        |                |                  | 1  |

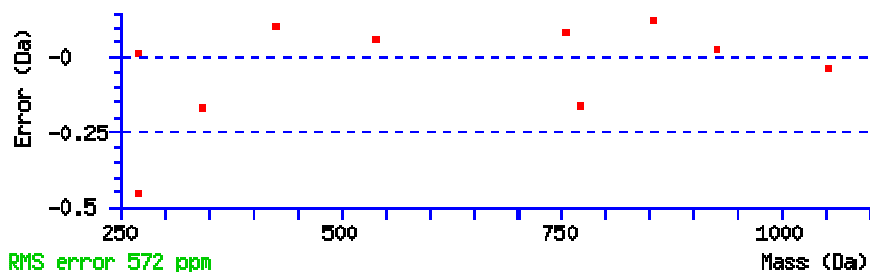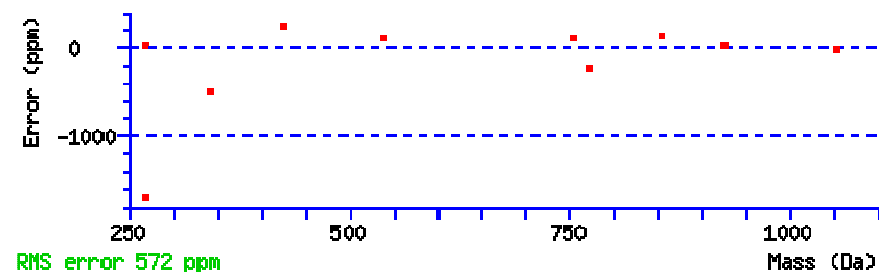

#### All matches to this query

| Score | Mr(calc):   | Delta     | Sequence                     |
|-------|-------------|-----------|------------------------------|
| 46.3  | 1194.635681 | 0.005805  | <a href="#">LQAVTDDHIR</a>   |
| 7.9   | 1192.645187 | 1.996299  | <a href="#">GPAVTDLDHLK</a>  |
| 7.5   | 1194.646896 | -0.005410 | <a href="#">RPSGTSHNALK</a>  |
| 7.2   | 1194.646912 | -0.005426 | <a href="#">LQHAGGDKSVR</a>  |
| 7.0   | 1194.631821 | 0.009665  | <a href="#">ICOLLSDYK</a>    |
| 6.5   | 1193.647812 | 0.993674  | <a href="#">EKFNQMVVK</a>    |
| 6.4   | 1193.629181 | 1.012305  | <a href="#">LEPSLALNSGPP</a> |
| 6.4   | 1194.635635 | 0.005851  | <a href="#">IQEEHREAK</a>    |
| 6.3   | 1194.635178 | 0.006308  | <a href="#">LKOELMSMK</a>    |

|     |             |          |                            |
|-----|-------------|----------|----------------------------|
| 5.8 | 1192.637299 | 2.004187 | <a href="#">MLISDSLDDK</a> |
|-----|-------------|----------|----------------------------|

MS/MS Fragmentation of **LTVEDPVTVEYITR**

Found in **IPI00024175.3**, Tax\_Id=9606 Gene\_Symbol=PSMA7 Isoform 1 of Proteasome subunit alpha type-7

Match to Query 5635: 1661.895422 from(831.954987,2+)

Title: Elution from: 41.95 to 45.78 period: FD070412dMavril07.raw experiment: 1 cycles: 1 precIntensity: 1640800.4 FinneganScanNumber: 3098

Data file D:\projecttemp\FD080412dM\FD070412dMavril07.msm

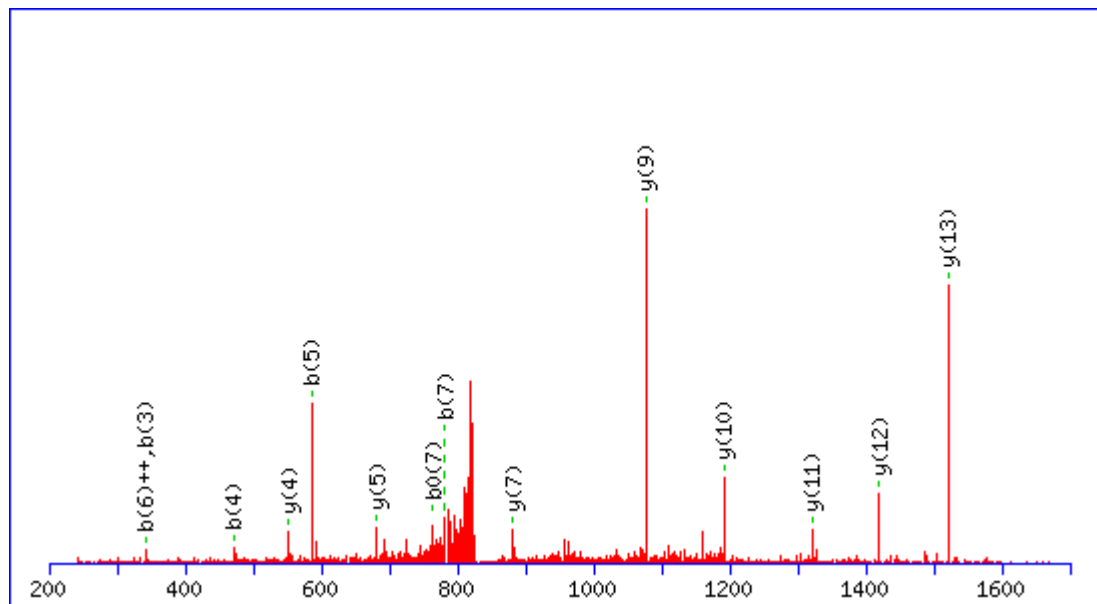

**Monoisotopic mass of neutral peptide Mr(calc):** 1661.887604

**Fixed modifications:** Carbamidomethyl (C)

**Variable modifications:**

**N-term :** Dimethyl (N-term)

**Ions Score:** 48 **Expect:** 0.0062

**Matches (Bold Red):** 14/126 fragment ions using 33 most intense peaks

| #  | b           | b <sup>++</sup> | b <sup>0</sup> | b <sup>0++</sup> | Seq. | y           | y <sup>++</sup> | y <sup>*</sup> | y <sup>*++</sup> | y <sup>0</sup> | y <sup>0++</sup> | #  |
|----|-------------|-----------------|----------------|------------------|------|-------------|-----------------|----------------|------------------|----------------|------------------|----|
| 1  | 142.122636  | 71.564956       |                |                  | L    |             |                 |                |                  |                |                  | 14 |
| 2  | 243.170315  | 122.088795      | 225.159750     | 113.083513       | T    | 1521.779517 | 761.393396      | 1504.752968    | 752.880122       | 1503.768952    | 752.388114       | 13 |
| 3  | 342.238729  | 171.623002      | 324.228164     | 162.617720       | V    | 1420.731838 | 710.869557      | 1403.705289    | 702.356283       | 1402.721273    | 701.864274       | 12 |
| 4  | 471.281322  | 236.144299      | 453.270757     | 227.139016       | E    | 1321.663424 | 661.335350      | 1304.636875    | 652.822075       | 1303.652859    | 652.330067       | 11 |
| 5  | 586.308265  | 293.657771      | 568.297700     | 284.652488       | D    | 1192.620831 | 596.814053      | 1175.594282    | 588.300779       | 1174.610266    | 587.808771       | 10 |
| 6  | 683.361029  | 342.184153      | 665.350464     | 333.178870       | P    | 1077.593888 | 539.300582      | 1060.567339    | 530.787307       | 1059.583323    | 530.295299       | 9  |
| 7  | 782.429443  | 391.718360      | 764.418878     | 382.713077       | V    | 980.541124  | 490.774200      | 963.514575     | 482.260925       | 962.530559     | 481.768917       | 8  |
| 8  | 883.477122  | 442.242199      | 865.466557     | 433.236917       | T    | 881.472710  | 441.239993      | 864.446161     | 432.726718       | 863.462145     | 432.234710       | 7  |
| 9  | 982.545536  | 491.776406      | 964.534971     | 482.771123       | V    | 780.425031  | 390.716153      | 763.398482     | 382.202879       | 762.414466     | 381.710871       | 6  |
| 10 | 1111.588129 | 556.297703      | 1093.577564    | 547.292420       | E    | 681.356617  | 341.181946      | 664.330068     | 332.668672       | 663.346052     | 332.176664       | 5  |
| 11 | 1274.651458 | 637.829367      | 1256.640893    | 628.824085       | Y    | 552.314024  | 276.660650      | 535.287475     | 268.147376       | 534.303459     | 267.655368       | 4  |
| 12 | 1387.735522 | 694.371399      | 1369.724957    | 685.366116       | I    | 389.250695  | 195.128985      | 372.224146     | 186.615711       | 371.240130     | 186.123703       | 3  |
| 13 | 1488.783201 | 744.895239      | 1470.772636    | 735.889956       | T    | 276.166631  | 138.586953      | 259.140082     | 130.073679       | 258.156066     | 129.581671       | 2  |
| 14 |             |                 |                |                  | R    | 175.118952  | 88.063114       | 158.092403     | 79.549839        |                |                  | 1  |

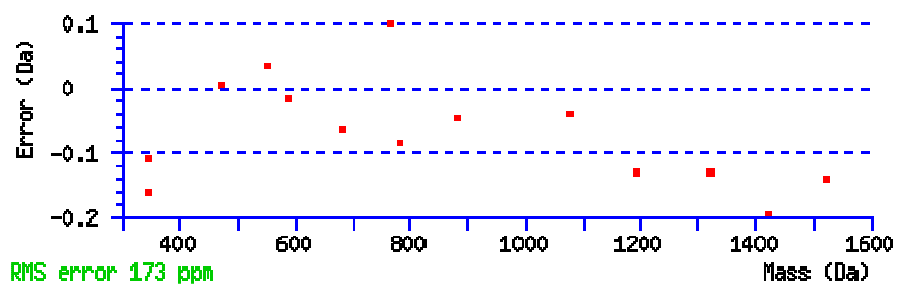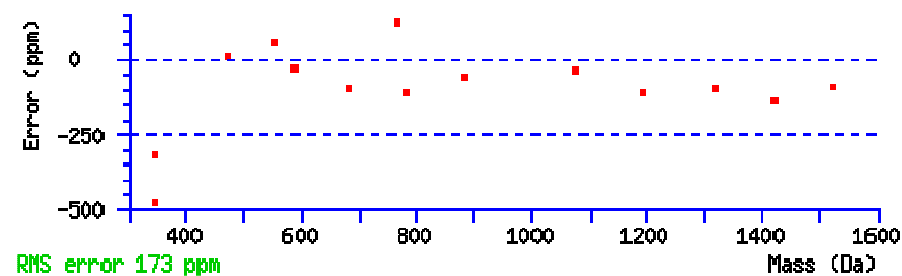

All matches to this query

| Score | Mr(calc):   | Delta     | Sequence                          |
|-------|-------------|-----------|-----------------------------------|
| 48.4  | 1661.887604 | 0.007818  | <a href="#">LTVEDPVTVEYITR</a>    |
| 10.2  | 1661.890945 | 0.004477  | <a href="#">TIDDLEDKCLKTK</a>     |
| 5.8   | 1660.881760 | 1.013662  | <a href="#">SENLNLSIKMDLTR</a>    |
| 5.1   | 1661.890945 | 0.004477  | <a href="#">TIDDLEDKCLKTK</a>     |
| 4.4   | 1661.910049 | -0.014627 | <a href="#">REAPAPSSGTPIAVGPK</a> |

|     |             |           |                                |
|-----|-------------|-----------|--------------------------------|
| 3.0 | 1660.885803 | 1.009619  | <a href="#">TFDSIMEAHKGITK</a> |
| 2.1 | 1661.906189 | -0.010767 | <a href="#">ELVLSKPCKFEEK</a>  |
| 1.8 | 1661.909546 | -0.014124 | <a href="#">LMQDKEEMIGKLG</a>  |
| 1.8 | 1661.909546 | -0.014124 | <a href="#">LMQDKEEMIGKLG</a>  |
| 1.7 | 1661.884415 | 0.011007  | <a href="#">LTMDMKVKEDQIR</a>  |

MS/MS Fragmentation of **MELDLEPDTSYGGTLR**

Found in **IPI00152151.4**, Tax\_Id=9606 Gene\_Symbol=FAM122B Isoform 3 of Protein FAM122B

Match to Query 6431: 1823.867466 from(912.941009,2+)

Title: Elution from: 41.95 to 45.78 period: FD070412dMavril07.raw experiment: 1 cycles: 1 precIntensity: 3187994.1 FinneganScanNumber: 3101

Data file D:\projecttemp\FD080412dM\FD070412dMavril07.msm

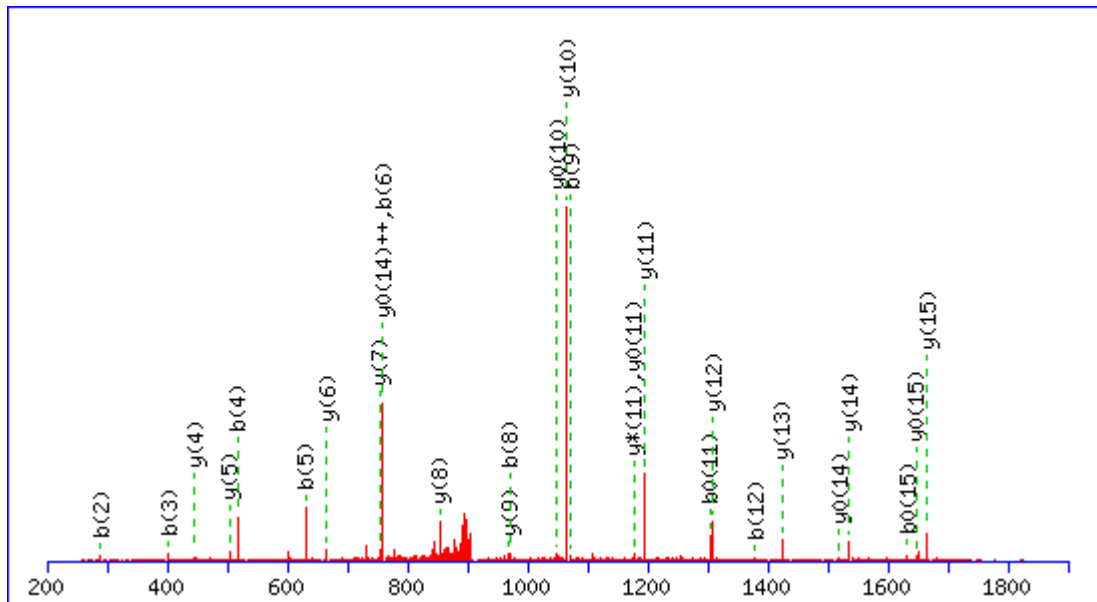

**Monoisotopic mass of neutral peptide Mr(calc):** 1823.861115

**Fixed modifications:** Carbamidomethyl (C)

**Variable modifications:**

**N-term :** Dimethyl (N-term)

**Ions Score:** 84 **Expect:** 9e-07

**Matches (Bold Red):** 28/144 fragment ions using 74 most intense peaks

| #  | b                  | b <sup>++</sup> | b <sup>0</sup>     | b <sup>0++</sup> | Seq. | y                  | y <sup>++</sup> | y*                 | y <sup>*++</sup> | y <sup>0</sup>     | y <sup>0++</sup>  | #  |
|----|--------------------|-----------------|--------------------|------------------|------|--------------------|-----------------|--------------------|------------------|--------------------|-------------------|----|
| 1  | 160.079057         | 80.543166       |                    |                  | M    |                    |                 |                    |                  |                    |                   | 16 |
| 2  | <b>289.121650</b>  | 145.064463      | 271.111085         | 136.059180       | E    | <b>1665.796623</b> | 833.401950      | 1648.770074        | 824.888675       | <b>1647.786058</b> | 824.396667        | 15 |
| 3  | <b>402.205714</b>  | 201.606495      | 384.195149         | 192.601213       | L    | <b>1536.754030</b> | 768.880653      | 1519.727481        | 760.367378       | <b>1518.743465</b> | <b>759.875370</b> | 14 |
| 4  | <b>517.232657</b>  | 259.119967      | 499.222092         | 250.114684       | D    | <b>1423.669966</b> | 712.338621      | 1406.643417        | 703.825347       | 1405.659401        | 703.333338        | 13 |
| 5  | <b>630.316721</b>  | 315.661999      | 612.306156         | 306.656716       | L    | <b>1308.643023</b> | 654.825149      | 1291.616474        | 646.311875       | 1290.632458        | 645.819867        | 12 |
| 6  | <b>759.359314</b>  | 380.183295      | 741.348749         | 371.178013       | E    | <b>1195.558959</b> | 598.283118      | <b>1178.532410</b> | 589.769843       | <b>1177.548394</b> | 589.277835        | 11 |
| 7  | 856.412078         | 428.709677      | 838.401513         | 419.704395       | P    | <b>1066.516366</b> | 533.761821      | 1049.489817        | 525.248547       | <b>1048.505801</b> | 524.756539        | 10 |
| 8  | <b>971.439021</b>  | 486.223149      | 953.428456         | 477.217866       | D    | <b>969.463602</b>  | 485.235439      | 952.437053         | 476.722164       | 951.453037         | 476.230156        | 9  |
| 9  | <b>1072.486700</b> | 536.746988      | 1054.476135        | 527.741706       | T    | <b>854.436659</b>  | 427.721968      | 837.410110         | 419.208693       | 836.426094         | 418.716685        | 8  |
| 10 | 1159.518728        | 580.263002      | 1141.508163        | 571.257720       | S    | <b>753.388980</b>  | 377.198128      | 736.362431         | 368.684853       | 735.378415         | 368.192845        | 7  |
| 11 | 1322.582057        | 661.794667      | <b>1304.571492</b> | 652.789384       | Y    | <b>666.356952</b>  | 333.682114      | 649.330403         | 325.168839       | 648.346387         | 324.676831        | 6  |
| 12 | <b>1379.603521</b> | 690.305399      | 1361.592956        | 681.300116       | G    | <b>503.293623</b>  | 252.150449      | 486.267074         | 243.637175       | 485.283058         | 243.145167        | 5  |
| 13 | 1436.624985        | 718.816131      | 1418.614420        | 709.810848       | G    | <b>446.272159</b>  | 223.639717      | 429.245610         | 215.126443       | 428.261594         | 214.634435        | 4  |
| 14 | 1537.672664        | 769.339970      | 1519.662099        | 760.334688       | T    | 389.250695         | 195.128985      | 372.224146         | 186.615711       | 371.240130         | 186.123703        | 3  |
| 15 | 1650.756728        | 825.882002      | <b>1632.746163</b> | 816.876720       | L    | 288.203016         | 144.605146      | 271.176467         | 136.091871       |                    |                   | 2  |
| 16 |                    |                 |                    |                  | R    | 175.118952         | 88.063114       | 158.092403         | 79.549839        |                    |                   | 1  |

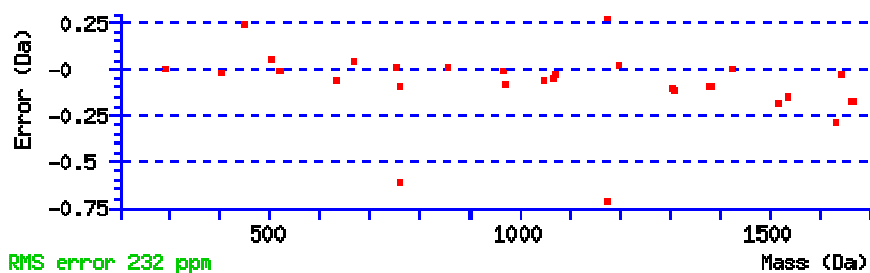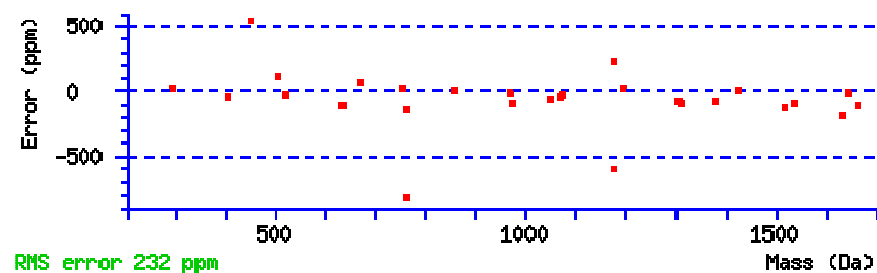

All matches to this query

| Score | Mr(calc):   | Delta     | Sequence                         |
|-------|-------------|-----------|----------------------------------|
| 84.0  | 1823.861115 | 0.006351  | <a href="#">MELDLEPDTSYGGTLR</a> |
| 15.9  | 1823.883163 | -0.015697 | <a href="#">SVITVCVCEMLTLGVQ</a> |
| 12.2  | 1823.873657 | -0.006191 | <a href="#">ARRPPGMEYSYDINR</a>  |

|     |             |           |                                    |
|-----|-------------|-----------|------------------------------------|
| 7.9 | 1822.854614 | 1.012852  | <a href="#">MLEDLEDLTSPEEFK</a>    |
| 6.5 | 1822.847946 | 1.019520  | <a href="#">STSCINLSVTDAGGSAQR</a> |
| 6.2 | 1821.878693 | 1.988773  | <a href="#">EMVAPDMCVATRLNK</a>    |
| 6.1 | 1823.853745 | 0.013721  | <a href="#">TETNEGTLDDFTVINR</a>   |
| 6.0 | 1823.875732 | -0.008266 | <a href="#">SDLSGVDVTMLNMLNR</a>   |
| 5.9 | 1822.847900 | 1.019566  | <a href="#">SRSEEDVQSMDARNK</a>    |
| 5.2 | 1822.859329 | 1.008137  | <a href="#">GDYLPETTRPQEMMK</a>    |



MS/MS Fragmentation of **MVSSYVGENAEFER**

Found in **IPI00026516.1**, Tax\_Id=9606 Gene\_Symbol=OXCT1 Succinyl-CoA:3-ketoacid-coenzyme A transferase 1, mitochondrial

Match to Query 5921: 1660.745638 from(831.380095,2+)

Title: Elution from: 29.71 to 33.57 period: FD070412dMavril04.raw experiment: 1 cycles: 1 precIntensity: 125653.2 FinneganScanNumber: 1981

Data file D:\projecttemp\FD080412dM\FD070412dMavril04.msm

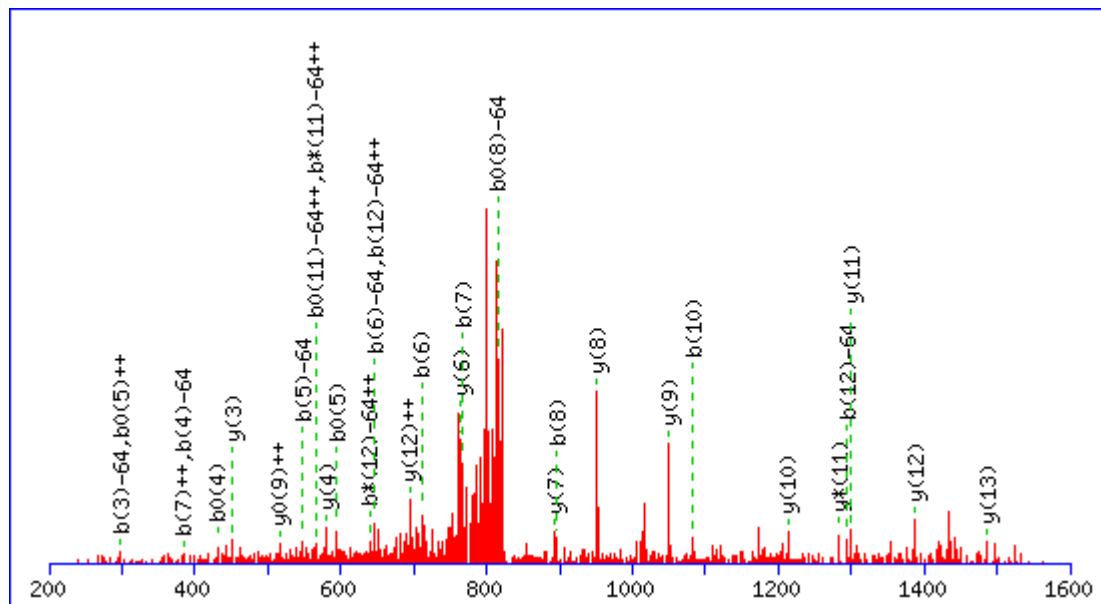

**Monoisotopic mass of neutral peptide Mr(calc):** 1660.740265

**Fixed modifications:** Carbamidomethyl (C)

**Variable modifications:**

**N-term :** Dimethyl (N-term)

**M1 :** Oxidation (M), with neutral losses 63.998285(shown in table), 0.000000

**Ions Score:** 43 **Expect:** 0.0051

**Matches (Bold Red):** 31/192 fragment ions using 81 most intense peaks

| #  | b           | b <sup>++</sup> | b*          | b <sup>*++</sup> | b <sup>0</sup> | b <sup>0++</sup> | Seq. | y           | y <sup>++</sup> | y*          | y <sup>*++</sup> | y <sup>0</sup> | y <sup>0++</sup> | #  |
|----|-------------|-----------------|-------------|------------------|----------------|------------------|------|-------------|-----------------|-------------|------------------|----------------|------------------|----|
| 1  | 112.075691  | 56.541483       |             |                  |                |                  | M    |             |                 |             |                  |                |                  | 14 |
| 2  | 211.144105  | 106.075690      |             |                  |                |                  | V    | 1486.680863 | 743.844070      | 1469.654314 | 735.330795       | 1468.670298    | 734.838787       | 13 |
| 3  | 298.176133  | 149.591704      |             |                  | 280.165568     | 140.586422       | S    | 1387.612449 | 694.309863      | 1370.585900 | 685.796588       | 1369.601884    | 685.304580       | 12 |
| 4  | 385.208161  | 193.107718      |             |                  | 367.197596     | 184.102436       | S    | 1300.580421 | 650.793848      | 1283.553872 | 642.280574       | 1282.569856    | 641.788566       | 11 |
| 5  | 548.271490  | 274.639383      |             |                  | 530.260925     | 265.634101       | Y    | 1213.548393 | 607.277835      | 1196.521844 | 598.764560       | 1195.537828    | 598.272552       | 10 |
| 6  | 647.339904  | 324.173590      |             |                  | 629.329339     | 315.168308       | V    | 1050.485064 | 525.746170      | 1033.458515 | 517.232896       | 1032.474499    | 516.740887       | 9  |
| 7  | 704.361368  | 352.684322      |             |                  | 686.350803     | 343.679040       | G    | 951.416650  | 476.211963      | 934.390101  | 467.698689       | 933.406085     | 467.206681       | 8  |
| 8  | 833.403961  | 417.205619      |             |                  | 815.393396     | 408.200336       | E    | 894.395186  | 447.701231      | 877.368637  | 439.187956       | 876.384621     | 438.695948       | 7  |
| 9  | 947.446888  | 474.227082      | 930.420339  | 465.713808       | 929.436323     | 465.221800       | N    | 765.352593  | 383.179935      | 748.326044  | 374.666660       | 747.342028     | 374.174652       | 6  |
| 10 | 1018.484002 | 509.745639      | 1001.457453 | 501.232365       | 1000.473437    | 500.740357       | A    | 651.309666  | 326.158471      | 634.283117  | 317.645196       | 633.299101     | 317.153188       | 5  |
| 11 | 1147.526595 | 574.266936      | 1130.500046 | 565.753661       | 1129.516030    | 565.261653       | E    | 580.272552  | 290.639914      | 563.246003  | 282.126639       | 562.261987     | 281.634631       | 4  |
| 12 | 1294.595009 | 647.801143      | 1277.568460 | 639.287868       | 1276.584444    | 638.795860       | F    | 451.229959  | 226.118617      | 434.203410  | 217.605343       | 433.219394     | 217.113335       | 3  |
| 13 | 1423.637602 | 712.322439      | 1406.611053 | 703.809165       | 1405.627037    | 703.317157       | E    | 304.161545  | 152.584410      | 287.134996  | 144.071136       | 286.150980     | 143.579128       | 2  |
| 14 |             |                 |             |                  |                |                  | R    | 175.118952  | 88.063114       | 158.092403  | 79.549839        |                |                  | 1  |

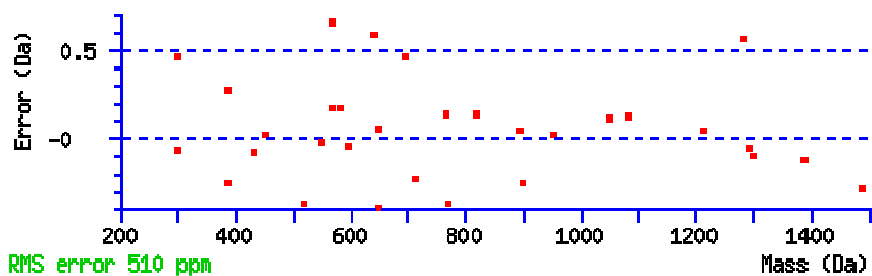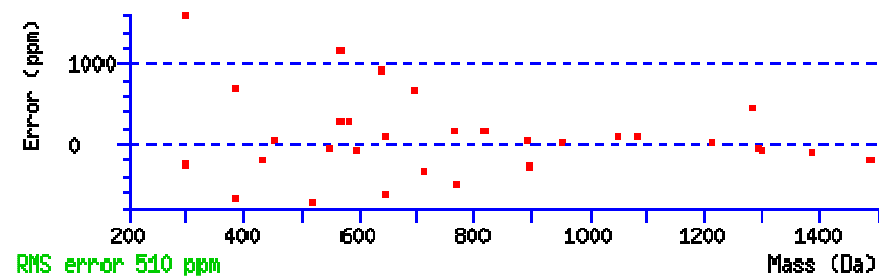

All matches to this query

| Score | Mr(calc):   | Delta    | Sequence                         |
|-------|-------------|----------|----------------------------------|
| 42.6  | 1660.740265 | 0.005373 | <a href="#">MVSSYVGENAEFER</a>   |
| 5.6   | 1660.736237 | 0.009401 | <a href="#">MNAVEENQGPGESQK</a>  |
| 2.1   | 1659.752243 | 0.993395 | <a href="#">MSGSQSEVAPSPQSPR</a> |
| 1.4   | 1659.741852 | 1.003786 | <a href="#">YMQKMGMTEDDKR</a>    |

MS/MS Fragmentation of **NSYVAGQYDDAASYQR**

Found in **IPI00853547.1**, Tax\_Id=9606 Gene\_Symbol=G6PD glucose-6-phosphate dehydrogenase isoform a

Match to Query 6558: 1834.819060 from(918.416806,2+)

Title: Elution from: 27.49 to 31.40 period: FD070412dMavril04.raw experiment: 1 cycles: 1 precIntensity: 187003.5 FinneganScanNumber: 1807

Data file D:\projecttemp\FD080412dM\FD070412dMavril04.msm

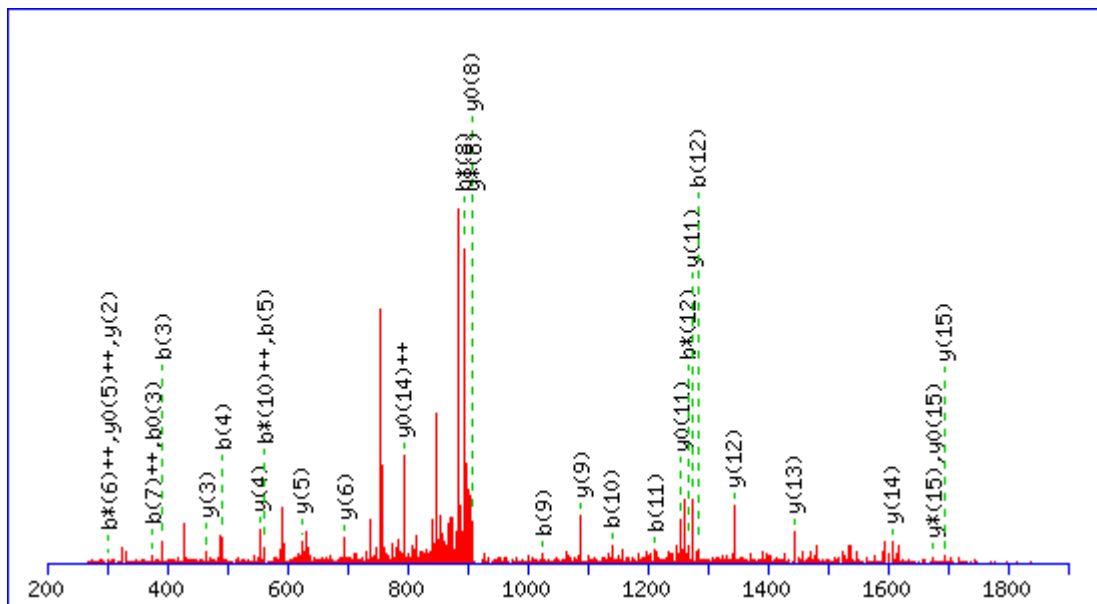

**Monoisotopic mass of neutral peptide Mr(calc):** 1834.812180

**Fixed modifications:** Carbamidomethyl (C)

**Variable modifications:**

**N-term :** Dimethyl (N-term)

**Ions Score:** 47 **Expect:** 0.0025

**Matches (Bold Red):** 31/172 fragment ions using 84 most intense peaks

| #  | b           | b <sup>++</sup> | b*          | b <sup>*++</sup> | b <sup>0</sup> | b <sup>0++</sup> | Seq. | y           | y <sup>++</sup> | y*          | y <sup>*++</sup> | y <sup>0</sup> | y <sup>0++</sup> | #  |
|----|-------------|-----------------|-------------|------------------|----------------|------------------|------|-------------|-----------------|-------------|------------------|----------------|------------------|----|
| 1  | 143.081499  | 72.044387       | 126.054950  | 63.531113        |                |                  | N    |             |                 |             |                  |                |                  | 16 |
| 2  | 230.113527  | 115.560401      | 213.086978  | 107.047127       | 212.102962     | 106.555119       | S    | 1693.745257 | 847.376267      | 1676.718708 | 838.862992       | 1675.734692    | 838.370984       | 15 |
| 3  | 393.176856  | 197.092066      | 376.150307  | 188.578791       | 375.166291     | 188.086783       | Y    | 1606.713229 | 803.860253      | 1589.686680 | 795.346978       | 1588.702664    | 794.854970       | 14 |
| 4  | 492.245270  | 246.626273      | 475.218721  | 238.112999       | 474.234705     | 237.620991       | V    | 1443.649900 | 722.328588      | 1426.623351 | 713.815314       | 1425.639335    | 713.323306       | 13 |
| 5  | 563.282384  | 282.144830      | 546.255835  | 273.631556       | 545.271819     | 273.139548       | A    | 1344.581486 | 672.794381      | 1327.554937 | 664.281107       | 1326.570921    | 663.789099       | 12 |
| 6  | 620.303848  | 310.655562      | 603.277299  | 302.142288       | 602.293283     | 301.650280       | G    | 1273.544372 | 637.275824      | 1256.517823 | 628.762550       | 1255.533807    | 628.270542       | 11 |
| 7  | 748.362426  | 374.684851      | 731.335877  | 366.171577       | 730.351861     | 365.679569       | Q    | 1216.522908 | 608.765092      | 1199.496359 | 600.251818       | 1198.512343    | 599.759810       | 10 |
| 8  | 911.425755  | 456.216516      | 894.399206  | 447.703241       | 893.415190     | 447.211233       | Y    | 1088.464330 | 544.735803      | 1071.437781 | 536.222529       | 1070.453765    | 535.730521       | 9  |
| 9  | 1026.452698 | 513.729987      | 1009.426149 | 505.216713       | 1008.442133    | 504.724705       | D    | 925.401001  | 463.204139      | 908.374452  | 454.690864       | 907.390436     | 454.198856       | 8  |
| 10 | 1141.479641 | 571.243459      | 1124.453092 | 562.730184       | 1123.469076    | 562.238176       | D    | 810.374058  | 405.690667      | 793.347509  | 397.177393       | 792.363493     | 396.685385       | 7  |
| 11 | 1212.516755 | 606.762016      | 1195.490206 | 598.248741       | 1194.506190    | 597.756733       | A    | 695.347115  | 348.177196      | 678.320566  | 339.663921       | 677.336550     | 339.171913       | 6  |
| 12 | 1283.553869 | 642.280573      | 1266.527320 | 633.767298       | 1265.543304    | 633.275290       | A    | 624.310001  | 312.658639      | 607.283452  | 304.145364       | 606.299436     | 303.653356       | 5  |
| 13 | 1370.585897 | 685.796587      | 1353.559348 | 677.283312       | 1352.575332    | 676.791304       | S    | 553.272887  | 277.140082      | 536.246338  | 268.626807       | 535.262322     | 268.134799       | 4  |
| 14 | 1533.649226 | 767.328251      | 1516.622677 | 758.814977       | 1515.638661    | 758.322969       | Y    | 466.240859  | 233.624068      | 449.214310  | 225.110793       |                |                  | 3  |
| 15 | 1661.707804 | 831.357540      | 1644.681255 | 822.844266       | 1643.697239    | 822.352258       | Q    | 303.177530  | 152.092403      | 286.150981  | 143.579129       |                |                  | 2  |
| 16 |             |                 |             |                  |                |                  | R    | 175.118952  | 88.063114       | 158.092403  | 79.549839        |                |                  | 1  |

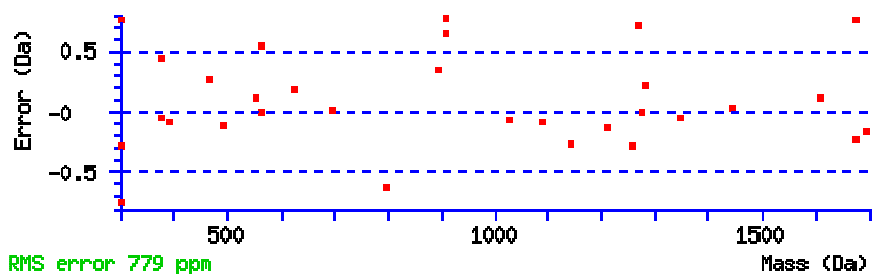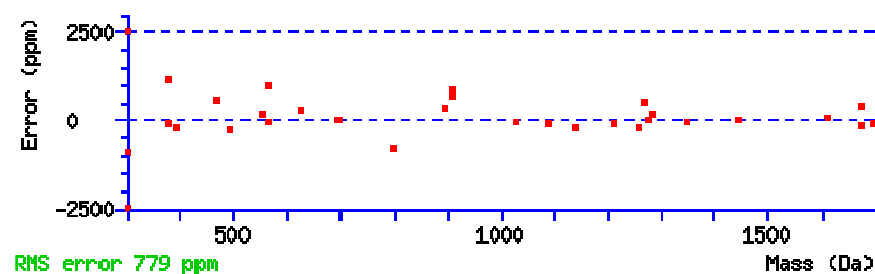

All matches to this query

| Score | Mr(calc):   | Delta    | Sequence                         |
|-------|-------------|----------|----------------------------------|
| 46.8  | 1834.812180 | 0.006880 | <a href="#">NSYVAGQYDDAASYQR</a> |

MS/MS Fragmentation of **NVIGLQMGTR**

Found in **IPI00550363.3**, Tax\_Id=9606 Gene\_Symbol=TAGLN2 Transgelin-2

Match to Query 4335: 1245.654876 from(623.834714,2+)

Title: Elution from: 25.15 to 28.99 period: FD070412dMavril06.raw experiment: 1 cycles: 1 precIntensity: 342830.3 FinneganScanNumber: 1556

Data file D:\projecttemp\FD080412dM\FD070412dMavril06.msm

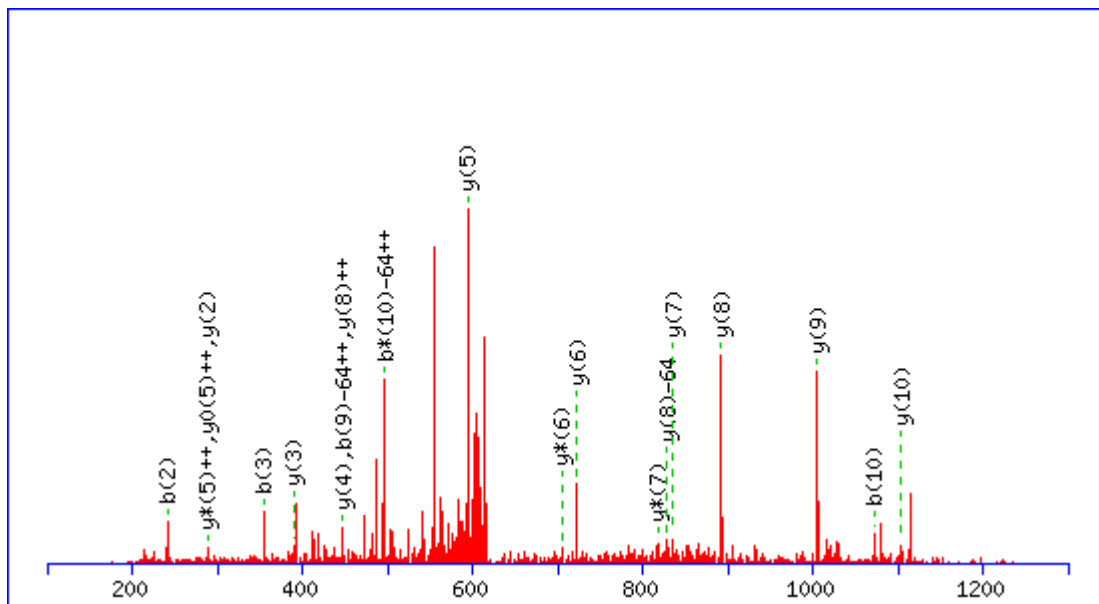

**Monoisotopic mass of neutral peptide Mr(calc):** 1245.649948

**Fixed modifications:** Carbamidomethyl (C)

**Variable modifications:**

**N-term :** Dimethyl (N-term)

**M7 :** Oxidation (M), with neutral losses 0.000000(shown in table), 63.998285

**Ions Score:** 43 **Expect:** 0.02

**Matches (Bold Red):** 20/156 fragment ions using 43 most intense peaks

| #  | b                  | b <sup>++</sup> | b*          | b <sup>*++</sup> | b <sup>0</sup> | b <sup>0++</sup> | Seq. | y                  | y <sup>++</sup>   | y*                | y <sup>*++</sup>  | y <sup>0</sup> | y <sup>0++</sup>  | #  |
|----|--------------------|-----------------|-------------|------------------|----------------|------------------|------|--------------------|-------------------|-------------------|-------------------|----------------|-------------------|----|
| 1  | 143.081499         | 72.044387       | 126.054950  | 63.531113        |                |                  | N    |                    |                   |                   |                   |                |                   | 11 |
| 2  | <b>242.149913</b>  | 121.578594      | 225.123364  | 113.065320       |                |                  | V    | <b>1104.583010</b> | 552.795143        | 1087.556461       | 544.281869        | 1086.572445    | 543.789861        | 10 |
| 3  | <b>355.233977</b>  | 178.120626      | 338.207428  | 169.607352       |                |                  | I    | <b>1005.514596</b> | 503.260936        | 988.488047        | 494.747661        | 987.504031     | 494.255653        | 9  |
| 4  | 412.255441         | 206.631358      | 395.228892  | 198.118084       |                |                  | G    | <b>892.430532</b>  | <b>446.718904</b> | 875.403983        | 438.205630        | 874.419967     | 437.713622        | 8  |
| 5  | 525.339505         | 263.173391      | 508.312956  | 254.660116       |                |                  | L    | <b>835.409068</b>  | 418.208172        | <b>818.382519</b> | 409.694898        | 817.398503     | 409.202890        | 7  |
| 6  | 653.398083         | 327.202680      | 636.371534  | 318.689405       |                |                  | Q    | <b>722.325004</b>  | 361.666140        | <b>705.298455</b> | 353.152866        | 704.314439     | 352.660858        | 6  |
| 7  | 800.433487         | 400.720382      | 783.406938  | 392.207107       |                |                  | M    | <b>594.266426</b>  | 297.636851        | 577.239877        | <b>289.123577</b> | 576.255861     | <b>288.631569</b> | 5  |
| 8  | 857.454951         | 429.231114      | 840.428402  | 420.717839       |                |                  | G    | <b>447.231022</b>  | 224.119149        | 430.204473        | 215.605874        | 429.220457     | 215.113866        | 4  |
| 9  | 958.502630         | 479.754953      | 941.476081  | 471.241679       | 940.492065     | 470.749671       | T    | <b>390.209558</b>  | 195.608417        | 373.183009        | 187.095142        | 372.198993     | 186.603134        | 3  |
| 10 | <b>1072.545557</b> | 536.776417      | 1055.519008 | 528.263142       | 1054.534992    | 527.771134       | N    | <b>289.161879</b>  | 145.084577        | 272.135330        | 136.571303        |                |                   | 2  |
| 11 |                    |                 |             |                  |                |                  | R    | 175.118952         | 88.063114         | 158.092403        | 79.549839         |                |                   | 1  |

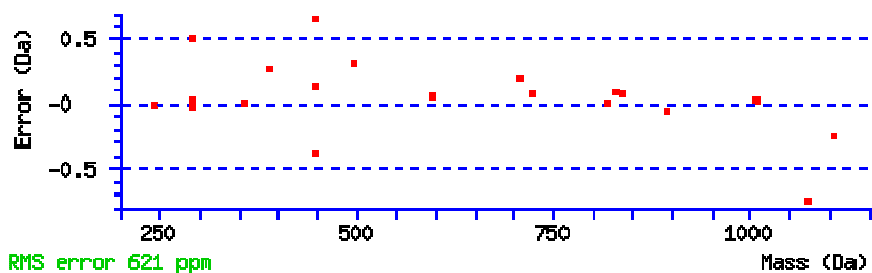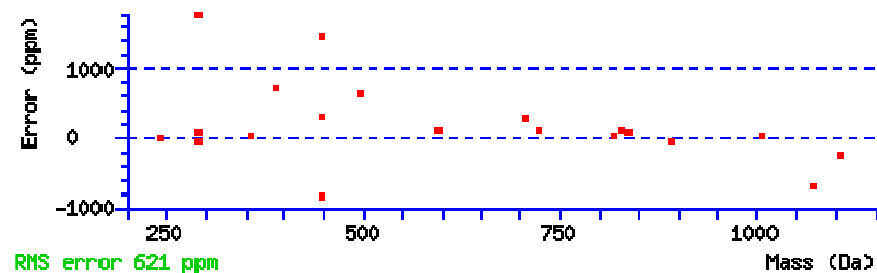

#### All matches to this query

| Score | Mr(calc):   | Delta     | Sequence                    |
|-------|-------------|-----------|-----------------------------|
| 43.0  | 1245.649948 | 0.004928  | <a href="#">NVIGLQMGTNR</a> |
| 4.9   | 1245.657806 | -0.002930 | <a href="#">XQPQPQRPR</a>   |
| 4.9   | 1245.663834 | -0.008958 | <a href="#">QLLEQESIMK</a>  |
| 4.0   | 1245.642731 | 0.012145  | <a href="#">MIADFLVEHK</a>  |
| 3.6   | 1243.641708 | 2.013168  | <a href="#">LVTGPMGPCLR</a> |
| 3.1   | 1245.656433 | -0.001557 | <a href="#">LKLSSGNEENK</a> |
| 2.6   | 1243.648193 | 2.006683  | <a href="#">MASLPPTENLK</a> |
| 1.6   | 1245.657318 | -0.002442 | <a href="#">DMKKAVAHMK</a>  |

|     |             |           |                            |
|-----|-------------|-----------|----------------------------|
| 0.6 | 1245.643402 | 0.011474  | <a href="#">RTPAKMCLNR</a> |
| 0.5 | 1245.657318 | -0.002442 | <a href="#">DMKKAVAHMK</a> |

MS/MS Fragmentation of **QPYAVSELAGHQ TSAESWGTGR**

Found in **IPI00003918.6**, Tax\_Id=9606 Gene\_Symbol=RPL4 60S ribosomal protein L4

Match to Query 6768: 2359.140936 from(787.387588,3+)

Title: Elution from: 34.01 to 37.86 period: FD070412dMavril05.raw experiment: 1 cycles: 1 precIntensity: 616428.9 FinneganScanNumber: 2266

Data file D:\projectemp\FD080412dM\FD070412dMavril05.msm

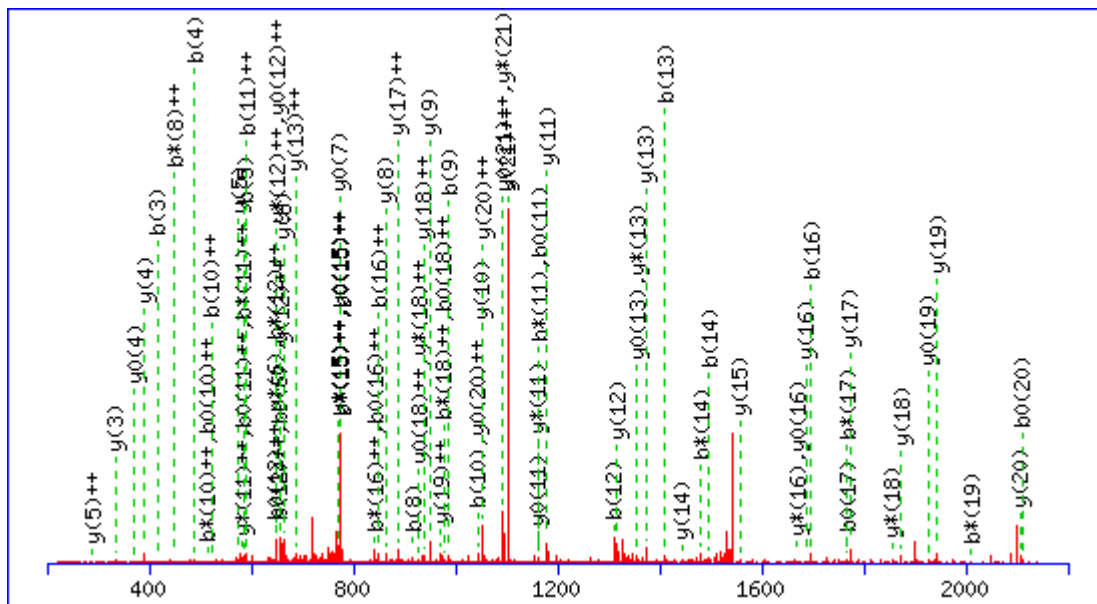

**Monoisotopic mass of neutral peptide Mr(calc):** 2359.119278

**Fixed modifications:** Carbamidomethyl (C)

**Variable modifications:**

**N-term :** Dimethyl (N-term)

**Ions Score:** 64 **Expect:** 0.00012

**Matches (Bold Red):** 82/238 fragment ions using 194 most intense peaks



| #  | b           | b <sup>++</sup> | b*          | b <sup>*++</sup> | b <sup>0</sup> | b <sup>0++</sup> | Seq. | y           | y <sup>++</sup> | y*          | y <sup>*++</sup> | y <sup>0</sup> | y <sup>0++</sup> | #  |
|----|-------------|-----------------|-------------|------------------|----------------|------------------|------|-------------|-----------------|-------------|------------------|----------------|------------------|----|
| 1  | 157.097150  | 79.052213       | 140.070601  | 70.538939        |                |                  | Q    |             |                 |             |                  |                |                  | 22 |
| 2  | 254.149914  | 127.578595      | 237.123365  | 119.065320       |                |                  | P    | 2204.036688 | 1102.521982     | 2187.010139 | 1094.008707      | 2186.026123    | 1093.516699      | 21 |
| 3  | 417.213243  | 209.110259      | 400.186694  | 200.596985       |                |                  | Y    | 2106.983924 | 1053.995600     | 2089.957375 | 1045.482325      | 2088.973359    | 1044.990317      | 20 |
| 4  | 488.250357  | 244.628816      | 471.223808  | 236.115542       |                |                  | A    | 1943.920595 | 972.463936      | 1926.894046 | 963.950661       | 1925.910030    | 963.458653       | 19 |
| 5  | 587.318771  | 294.163024      | 570.292222  | 285.649749       |                |                  | V    | 1872.883481 | 936.945379      | 1855.856932 | 928.432104       | 1854.872916    | 927.940096       | 18 |
| 6  | 674.350799  | 337.679037      | 657.324250  | 329.165763       | 656.340234     | 328.673755       | S    | 1773.815067 | 887.411172      | 1756.788518 | 878.897897       | 1755.804502    | 878.405889       | 17 |
| 7  | 803.393392  | 402.200334      | 786.366843  | 393.687059       | 785.382827     | 393.195051       | E    | 1686.783039 | 843.895158      | 1669.756490 | 835.381883       | 1668.772474    | 834.889875       | 16 |
| 8  | 916.477456  | 458.742366      | 899.450907  | 450.229091       | 898.466891     | 449.737083       | L    | 1557.740446 | 779.373861      | 1540.713897 | 770.860587       | 1539.729881    | 770.368579       | 15 |
| 9  | 987.514570  | 494.260923      | 970.488021  | 485.747648       | 969.504005     | 485.255640       | A    | 1444.656382 | 722.831829      | 1427.629833 | 714.318555       | 1426.645817    | 713.826547       | 14 |
| 10 | 1044.536034 | 522.771655      | 1027.509485 | 514.258381       | 1026.525469    | 513.766372       | G    | 1373.619268 | 687.313272      | 1356.592719 | 678.799998       | 1355.608703    | 678.307990       | 13 |
| 11 | 1181.594946 | 591.301111      | 1164.568397 | 582.787837       | 1163.584381    | 582.295829       | H    | 1316.597804 | 658.802540      | 1299.571255 | 650.289266       | 1298.587239    | 649.797258       | 12 |
| 12 | 1309.653524 | 655.330400      | 1292.626975 | 646.817126       | 1291.642959    | 646.325118       | Q    | 1179.538892 | 590.273084      | 1162.512343 | 581.759810       | 1161.528327    | 581.267802       | 11 |
| 13 | 1410.701203 | 705.854240      | 1393.674654 | 697.340965       | 1392.690638    | 696.848957       | T    | 1051.480314 | 526.243795      | 1034.453765 | 517.730521       | 1033.469749    | 517.238513       | 10 |
| 14 | 1497.733231 | 749.370254      | 1480.706682 | 740.856979       | 1479.722666    | 740.364971       | S    | 950.432635  | 475.719956      | 933.406086  | 467.206681       | 932.422070     | 466.714673       | 9  |
| 15 | 1568.770345 | 784.888811      | 1551.743796 | 776.375536       | 1550.759780    | 775.883528       | A    | 863.400607  | 432.203942      | 846.374058  | 423.690667       | 845.390042     | 423.198659       | 8  |
| 16 | 1697.812938 | 849.410107      | 1680.786389 | 840.896833       | 1679.802373    | 840.404825       | E    | 792.363493  | 396.685385      | 775.336944  | 388.172110       | 774.352928     | 387.680102       | 7  |
| 17 | 1784.844966 | 892.926121      | 1767.818417 | 884.412847       | 1766.834401    | 883.920839       | S    | 663.320900  | 332.164088      | 646.294351  | 323.650813       | 645.310335     | 323.158805       | 6  |
| 18 | 1970.924279 | 985.965778      | 1953.897730 | 977.452503       | 1952.913714    | 976.960495       | W    | 576.288872  | 288.648074      | 559.262323  | 280.134799       | 558.278307     | 279.642791       | 5  |
| 19 | 2027.945743 | 1014.476510     | 2010.919194 | 1005.963235      | 2009.935178    | 1005.471227      | G    | 390.209559  | 195.608417      | 373.183010  | 187.095143       | 372.198994     | 186.603135       | 4  |
| 20 | 2128.993422 | 1065.000349     | 2111.966873 | 1056.487074      | 2110.982857    | 1055.995066      | T    | 333.188095  | 167.097685      | 316.161546  | 158.584411       | 315.177530     | 158.092403       | 3  |
| 21 | 2186.014886 | 1093.511081     | 2168.988337 | 1084.997806      | 2168.004321    | 1084.505798      | G    | 232.140416  | 116.573846      | 215.113867  | 108.060571       |                |                  | 2  |
| 22 |             |                 |             |                  |                |                  | R    | 175.118952  | 88.063114       | 158.092403  | 79.549839        |                |                  | 1  |

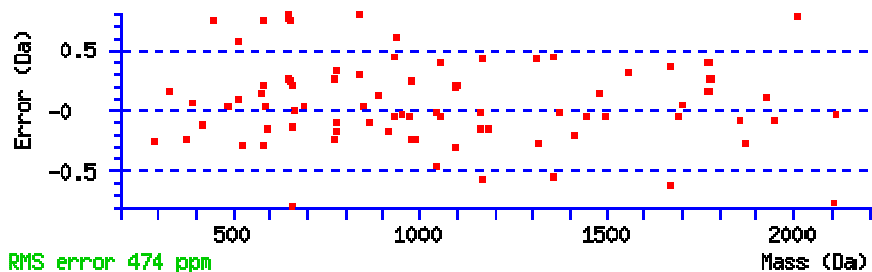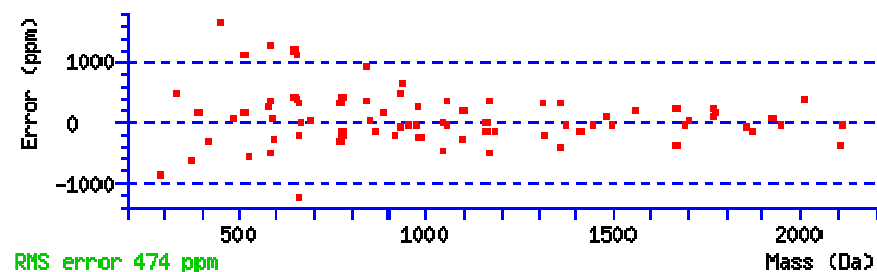

All matches to this query

| Score | Mr(calc):   | Delta     | Sequence                                |
|-------|-------------|-----------|-----------------------------------------|
| 63.9  | 2359.119278 | 0.021658  | <a href="#">QPYAVSELAGHQ TSAESWGTGR</a> |
| 5.4   | 2357.153259 | 1.987677  | <a href="#">QQAQEA AVPSQSCSTSLEALK</a>  |
| 3.6   | 2357.124283 | 2.016653  | <a href="#">PSTSEIEDQSMMGKFKVER</a>     |
| 2.1   | 2359.143295 | -0.002359 | <a href="#">QTSSTEMLQEIR TMMTQLK</a>    |
| 1.8   | 2359.152496 | -0.011560 | <a href="#">DAAHMLQANKTYGCV PVANKR</a>  |
| 0.8   | 2359.145111 | -0.004175 | <a href="#">QGPSETAVQMEARSSVPAGHHR</a>  |
| 0.3   | 2358.155914 | 0.985022  | <a href="#">DLGSDSPIQTDHMMERLLLK</a>    |
| 0.2   | 2357.141357 | 1.999579  | <a href="#">HNVHPTQIYGHHKEQFSDR</a>     |
| 0.1   | 2357.143356 | 1.997580  | <a href="#">KQVGYIMOEYNDTLQRAER</a>     |

---

MS/MS Fragmentation of **RPQYSNPPVQGEVMEGADNQGAGEQGR**

Found in **IPI00031812.3**, Tax\_Id=9606 Gene\_Symbol=YBX1 Nuclease-sensitive element-binding protein 1

Match to Query 7039: 2898.347847 from(967.123225,3+)

Title: Elution from: 26.57 to 30.45 period: FD070412dMavril05.raw experiment: 1 cycles: 1 precIntensity: 145969.2 FinneganScanNumber: 1684

Data file D:\projectemp\FD080412dM\FD070412dMavril05.msm

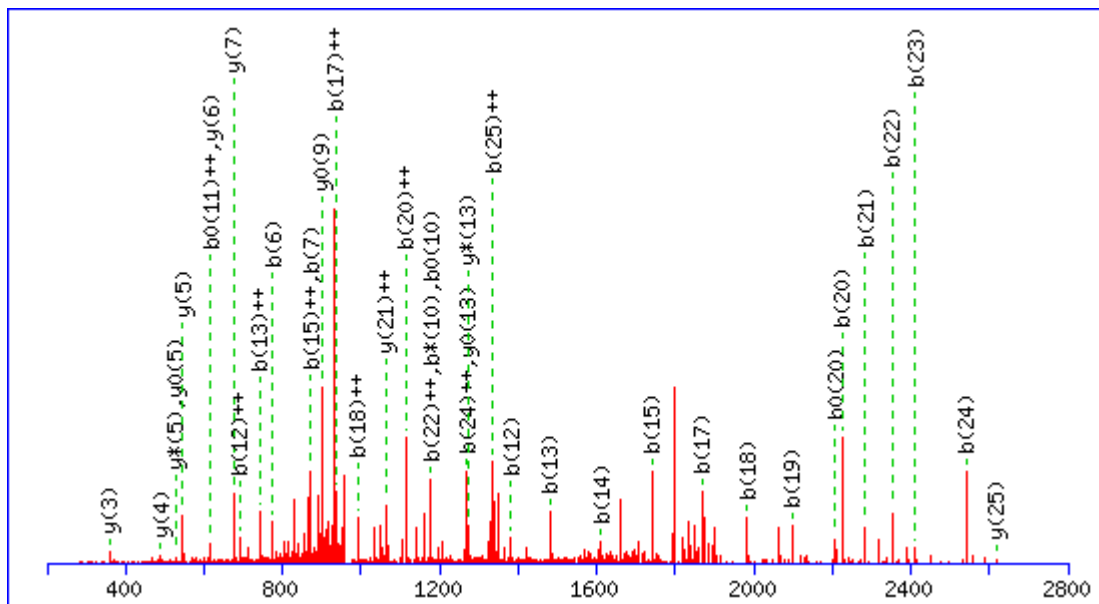

**Monoisotopic mass of neutral peptide Mr(calc):** 2898.331467

**Fixed modifications:** Carbamidomethyl (C)

**Variable modifications:**

**N-term :** Dimethyl (N-term)

**Ions Score:** 77 **Expect:** 3.8e-06

**Matches (Bold Red):** 39/298 fragment ions using 62 most intense peaks

| #  | b                  | b <sup>++</sup>    | b*                 | b <sup>*++</sup> | b <sup>0</sup>     | b <sup>0++</sup>  | Seq. | y                  | y <sup>++</sup>    | y*                 | y <sup>*++</sup> | y <sup>0</sup>     | y <sup>0++</sup> | #  |
|----|--------------------|--------------------|--------------------|------------------|--------------------|-------------------|------|--------------------|--------------------|--------------------|------------------|--------------------|------------------|----|
| 1  | 185.139683         | 93.073479          | 168.113134         | 84.560205        |                    |                   | R    |                    |                    |                    |                  |                    |                  | 27 |
| 2  | 282.192447         | 141.599861         | 265.165898         | 133.086587       |                    |                   | P    | 2715.206350        | 1358.106813        | 2698.179801        | 1349.593538      | 2697.195785        | 1349.101530      | 26 |
| 3  | 410.251025         | 205.629150         | 393.224476         | 197.115876       |                    |                   | Q    | <b>2618.153586</b> | 1309.580431        | 2601.127037        | 1301.067156      | 2600.143021        | 1300.575148      | 25 |
| 4  | 573.314354         | 287.160815         | 556.287805         | 278.647540       |                    |                   | Y    | 2490.095008        | 1245.551142        | 2473.068459        | 1237.037867      | 2472.084443        | 1236.545859      | 24 |
| 5  | 660.346382         | 330.676829         | 643.319833         | 322.163554       | 642.335817         | 321.671546        | S    | 2327.031679        | 1164.019477        | 2310.005130        | 1155.506203      | 2309.021114        | 1155.014195      | 23 |
| 6  | <b>774.389309</b>  | 387.698292         | 757.362760         | 379.185018       | 756.378744         | 378.693010        | N    | 2239.999651        | 1120.503463        | 2222.973102        | 1111.990189      | 2221.989086        | 1111.498181      | 22 |
| 7  | <b>871.442073</b>  | 436.224674         | 854.415524         | 427.711400       | 853.431508         | 427.219392        | P    | 2125.956724        | <b>1063.482000</b> | 2108.930175        | 1054.968725      | 2107.946159        | 1054.476717      | 21 |
| 8  | 968.494837         | 484.751057         | 951.468288         | 476.237782       | 950.484272         | 475.745774        | P    | 2028.903960        | 1014.955618        | 2011.877411        | 1006.442344      | 2010.893395        | 1005.950336      | 20 |
| 9  | 1067.563251        | 534.285264         | 1050.536702        | 525.771989       | 1049.552686        | 525.279981        | V    | 1931.851196        | 966.429236         | 1914.824647        | 957.915962       | 1913.840631        | 957.423954       | 19 |
| 10 | 1195.621829        | 598.314552         | <b>1178.595280</b> | 589.801278       | <b>1177.611264</b> | 589.309270        | Q    | 1832.782782        | 916.895029         | 1815.756233        | 908.381755       | 1814.772217        | 907.889747       | 18 |
| 11 | 1252.643293        | 626.825284         | 1235.616744        | 618.312010       | 1234.632728        | <b>617.820002</b> | G    | 1704.724204        | 852.865740         | 1687.697655        | 844.352466       | 1686.713639        | 843.860458       | 17 |
| 12 | <b>1381.685886</b> | <b>691.346581</b>  | 1364.659337        | 682.833307       | 1363.675321        | 682.341298        | E    | 1647.702740        | 824.355008         | 1630.676191        | 815.841734       | 1629.692175        | 815.349726       | 16 |
| 13 | <b>1480.754300</b> | <b>740.880788</b>  | 1463.727751        | 732.367514       | 1462.743735        | 731.875506        | V    | 1518.660147        | 759.833712         | 1501.633598        | 751.320437       | 1500.649582        | 750.828429       | 15 |
| 14 | <b>1611.794785</b> | 806.401031         | 1594.768236        | 797.887756       | 1593.784220        | 797.395748        | M    | 1419.591733        | 710.299505         | 1402.565184        | 701.786230       | 1401.581168        | 701.294222       | 14 |
| 15 | <b>1740.837378</b> | <b>870.922327</b>  | 1723.810829        | 862.409053       | 1722.826813        | 861.917044        | E    | 1288.551248        | 644.779262         | <b>1271.524699</b> | 636.265988       | <b>1270.540683</b> | 635.773980       | 13 |
| 16 | 1797.858842        | 899.433059         | 1780.832293        | 890.919784       | 1779.848277        | 890.427776        | G    | 1159.508655        | 580.257966         | 1142.482106        | 571.744691       | 1141.498090        | 571.252683       | 12 |
| 17 | <b>1868.895956</b> | <b>934.951616</b>  | 1851.869407        | 926.438341       | 1850.885391        | 925.946333        | A    | 1102.487191        | 551.747234         | 1085.460642        | 543.233959       | 1084.476626        | 542.741951       | 11 |
| 18 | <b>1983.922899</b> | <b>992.465087</b>  | 1966.896350        | 983.951813       | 1965.912334        | 983.459805        | D    | 1031.450077        | 516.228677         | 1014.423528        | 507.715402       | 1013.439512        | 507.223394       | 10 |
| 19 | <b>2097.965826</b> | 1049.486551        | 2080.939277        | 1040.973276      | 2079.955261        | 1040.481268       | N    | 916.423134         | 458.715205         | 899.396585         | 450.201931       | <b>898.412569</b>  | 449.709923       | 9  |
| 20 | <b>2226.024404</b> | <b>1113.515840</b> | 2208.997855        | 1105.002565      | <b>2208.013839</b> | 1104.510557       | Q    | 802.380207         | 401.693742         | 785.353658         | 393.180467       | 784.369642         | 392.688459       | 8  |
| 21 | <b>2283.045868</b> | 1142.026572        | 2266.019319        | 1133.513297      | 2265.035303        | 1133.021289       | G    | <b>674.321629</b>  | 337.664453         | 657.295080         | 329.151178       | 656.311064         | 328.659170       | 7  |
| 22 | <b>2354.082982</b> | <b>1177.545129</b> | 2337.056433        | 1169.031854      | 2336.072417        | 1168.539846       | A    | <b>617.300165</b>  | 309.153721         | 600.273616         | 300.640446       | 599.289600         | 300.148438       | 6  |
| 23 | <b>2411.104446</b> | 1206.055861        | 2394.077897        | 1197.542586      | 2393.093881        | 1197.050578       | G    | <b>546.263051</b>  | 273.635164         | <b>529.236502</b>  | 265.121889       | <b>528.252486</b>  | 264.629881       | 5  |
| 24 | <b>2540.147039</b> | <b>1270.577157</b> | 2523.120490        | 1262.063883      | 2522.136474        | 1261.571875       | E    | <b>489.241587</b>  | 245.124432         | 472.215038         | 236.611157       | 471.231022         | 236.119149       | 4  |
| 25 | 2668.205617        | <b>1334.606446</b> | 2651.179068        | 1326.093172      | 2650.195052        | 1325.601164       | Q    | <b>360.198994</b>  | 180.603135         | 343.172445         | 172.089860       |                    |                  | 3  |
| 26 | 2725.227081        | 1363.117178        | 2708.200532        | 1354.603904      | 2707.216516        | 1354.111896       | G    | 232.140416         | 116.573846         | 215.113867         | 108.060571       |                    |                  | 2  |
| 27 |                    |                    |                    |                  |                    |                   | R    | 175.118952         | 88.063114          | 158.092403         | 79.549839        |                    |                  | 1  |

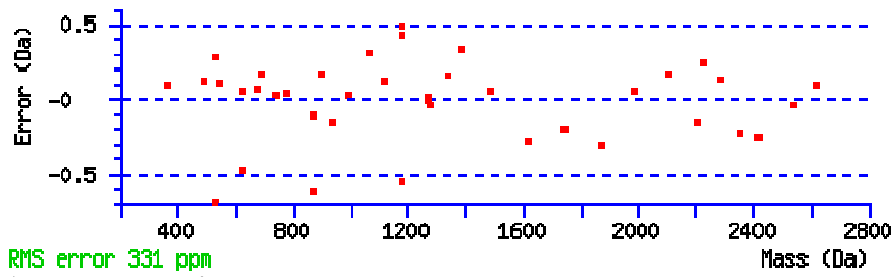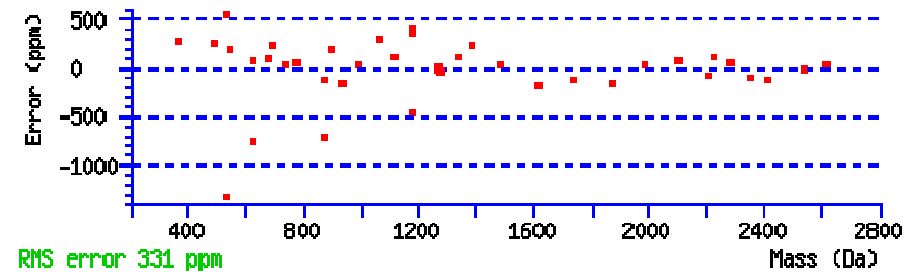

| Score | Mr(calc):   | Delta     | Sequence                                    |
|-------|-------------|-----------|---------------------------------------------|
| 76.7  | 2898.331467 | 0.016380  | <a href="#">RPQYSNPPVQGEVMEGADNQGAGEQGR</a> |
| 7.0   | 2897.338211 | 1.009636  | <a href="#">TQEELMNSNQMSDLSQKLEELQR</a>     |
| 3.2   | 2896.347031 | 2.000816  | <a href="#">QIFTRISTDDDIETNSSTFMKEMK</a>    |
| 2.4   | 2898.352554 | -0.004707 | <a href="#">NDMKSRLSSLSPANHENQPSEGER</a>    |
| 1.5   | 2896.357132 | 1.990715  | <a href="#">IMGYDWAERCQHVPFGVVQGMKTR</a>    |

MS/MS Fragmentation of **SADGSAPAGEGEGVTLQR**

Found in **IPI00008986.1**, Tax\_Id=9606 Gene\_Symbol=SLC7A5 Large neutral amino acids transporter small subunit 1

Match to Query 6041: 1729.845448 from(865.930000,2+)

Title: Elution from: 23.29 to 27.22 period: FD070412dMavril07.raw experiment: 1 cycles: 1 precIntensity: 0.0 FinneganScanNumber: 1575

Data file D:\projecttemp\FD080412dM\FD070412dMavril07.msm

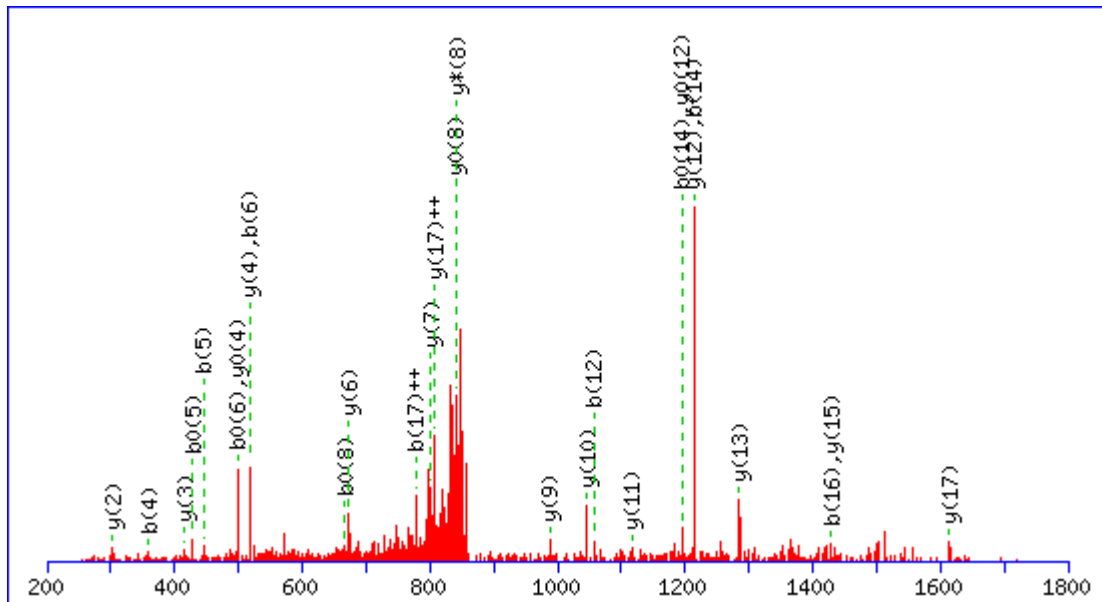

**Monoisotopic mass of neutral peptide Mr(calc):** 1728.827850

**Fixed modifications:** Carbamidomethyl (C)

**Variable modifications:**

**N-term :** Dimethyl (N-term)

**Ions Score:** 64 **Expect:** 0.00011

**Matches (Bold Red):** 28/166 fragment ions using 77 most intense peaks

| #  | b           | b <sup>++</sup> | b*          | b <sup>***</sup> | b <sup>0</sup> | b <sup>0++</sup> | Seq. | y           | y <sup>++</sup> | y*          | y <sup>***</sup> | y <sup>0</sup> | y <sup>0++</sup> | #  |
|----|-------------|-----------------|-------------|------------------|----------------|------------------|------|-------------|-----------------|-------------|------------------|----------------|------------------|----|
| 1  | 116.070600  | 58.538938       |             |                  | 98.060035      | 49.533656        | S    |             |                 |             |                  |                |                  | 18 |
| 2  | 187.107714  | 94.057495       |             |                  | 169.097149     | 85.052212        | A    | 1614.771806 | 807.889541      | 1597.745257 | 799.376267       | 1596.761241    | 798.884258       | 17 |
| 3  | 302.134657  | 151.570966      |             |                  | 284.124092     | 142.565684       | D    | 1543.734692 | 772.370984      | 1526.708143 | 763.857710       | 1525.724127    | 763.365702       | 16 |
| 4  | 359.156121  | 180.081698      |             |                  | 341.145556     | 171.076416       | G    | 1428.707749 | 714.857512      | 1411.681200 | 706.344238       | 1410.697184    | 705.852230       | 15 |
| 5  | 446.188149  | 223.597713      |             |                  | 428.177584     | 214.592430       | S    | 1371.686285 | 686.346781      | 1354.659736 | 677.833506       | 1353.675720    | 677.341498       | 14 |
| 6  | 517.225263  | 259.116270      |             |                  | 499.214698     | 250.110987       | A    | 1284.654257 | 642.830766      | 1267.627708 | 634.317492       | 1266.643692    | 633.825484       | 13 |
| 7  | 614.278027  | 307.642652      |             |                  | 596.267462     | 298.637369       | P    | 1213.617143 | 607.312210      | 1196.590594 | 598.798935       | 1195.606578    | 598.306927       | 12 |
| 8  | 685.315141  | 343.161209      |             |                  | 667.304576     | 334.155926       | A    | 1116.564379 | 558.785828      | 1099.537830 | 550.272553       | 1098.553814    | 549.780545       | 11 |
| 9  | 742.336605  | 371.671941      |             |                  | 724.326040     | 362.666658       | G    | 1045.527265 | 523.267270      | 1028.500716 | 514.753996       | 1027.516700    | 514.261988       | 10 |
| 10 | 871.379198  | 436.193237      |             |                  | 853.368633     | 427.187955       | E    | 988.505801  | 494.756539      | 971.479252  | 486.243264       | 970.495236     | 485.751256       | 9  |
| 11 | 928.400662  | 464.703969      |             |                  | 910.390097     | 455.698687       | G    | 859.463208  | 430.235242      | 842.436659  | 421.721968       | 841.452643     | 421.229960       | 8  |
| 12 | 1057.443255 | 529.225266      |             |                  | 1039.432690    | 520.219983       | E    | 802.441744  | 401.724510      | 785.415195  | 393.211235       | 784.431179     | 392.719227       | 7  |
| 13 | 1114.464719 | 557.735998      |             |                  | 1096.454154    | 548.730715       | G    | 673.399151  | 337.203213      | 656.372602  | 328.689939       | 655.388586     | 328.197931       | 6  |
| 14 | 1213.533133 | 607.270205      |             |                  | 1195.522568    | 598.264922       | V    | 616.377687  | 308.692481      | 599.351138  | 300.179207       | 598.367122     | 299.687199       | 5  |
| 15 | 1314.580812 | 657.794044      |             |                  | 1296.570247    | 648.788762       | T    | 517.309273  | 259.158274      | 500.282724  | 250.645000       | 499.298708     | 250.152992       | 4  |
| 16 | 1427.664876 | 714.336076      |             |                  | 1409.654311    | 705.330794       | L    | 416.261594  | 208.634435      | 399.235045  | 200.121160       |                |                  | 3  |
| 17 | 1555.723454 | 778.365365      | 1538.696905 | 769.852091       | 1537.712889    | 769.360083       | Q    | 303.177530  | 152.092403      | 286.150981  | 143.579128       |                |                  | 2  |
| 18 |             |                 |             |                  |                |                  | R    | 175.118952  | 88.063114       | 158.092403  | 79.549839        |                |                  | 1  |

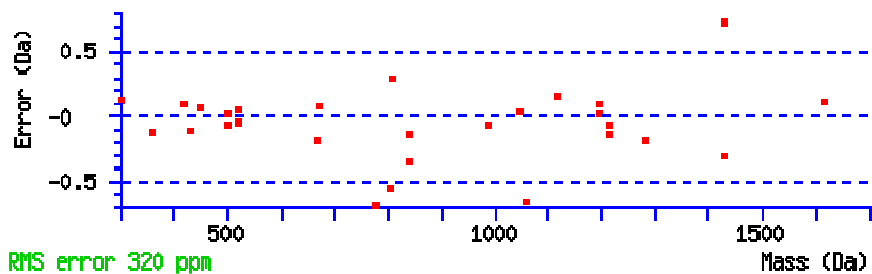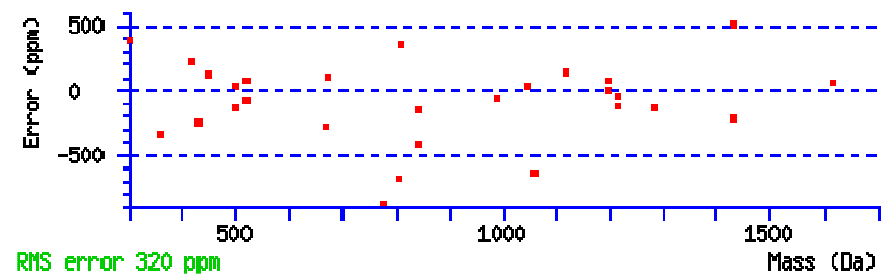

All matches to this query

| Score | Mr(calc):   | Delta    | Sequence                           |
|-------|-------------|----------|------------------------------------|
| 63.8  | 1728.827850 | 1.017598 | <a href="#">SADGSAPAGEGEGVTLQR</a> |

|      |             |           |                                    |
|------|-------------|-----------|------------------------------------|
| 14.9 | 1728.840424 | 1.005024  | <a href="#">IDWGRGGGQERTNQR</a>    |
| 9.7  | 1727.843765 | 2.001683  | <a href="#">EAAAAREEAEQALGER</a>   |
| 6.4  | 1728.858337 | 0.987111  | <a href="#">SFEDIHHYREQIK</a>      |
| 5.9  | 1728.846466 | 0.998982  | <a href="#">GVAAMENNTLVPQQNK</a>   |
| 5.7  | 1728.836578 | 1.008870  | <a href="#">SASMHTFLNHSATGIR</a>   |
| 5.4  | 1729.855621 | -0.010173 | <a href="#">DMPLSSDGNPKVNEK</a>    |
| 4.6  | 1728.843094 | 1.002354  | <a href="#">KFQLPPAADESGDAQR</a>   |
| 4.2  | 1728.847824 | 0.997624  | <a href="#">MGPGQHGVAPPPAGRER</a>  |
| 3.7  | 1728.857697 | 0.987751  | <a href="#">MEGSGGGAGERAPLLGAR</a> |



MS/MS Fragmentation of **SAINVVTR**

Found in **IPI00026302.3**, Tax\_Id=9606 Gene\_Symbol=RPL31 60S ribosomal protein L31

Match to Query 3478: 1015.568526 from(508.791539,2+)

Title: Elution from: 23.13 to 27.02 period: FD070412dMavril06.raw experiment: 1 cycles: 1 precIntensity: 684019.5 FinneganScanNumber: 1414

Data file D:\projecttemp\FD080412dM\FD070412dMavril06.msm

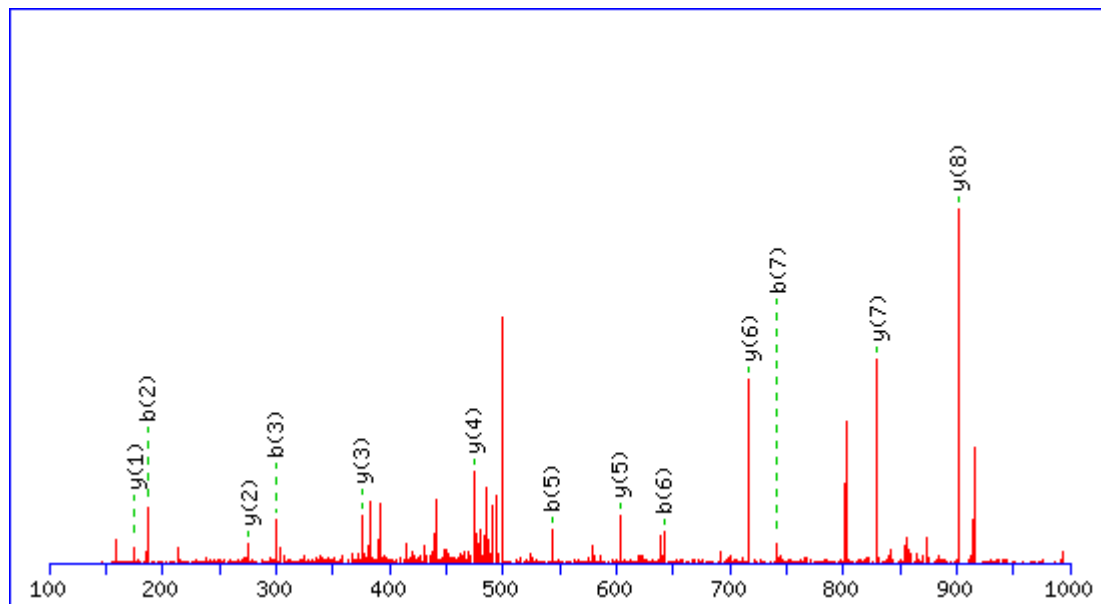

**Monoisotopic mass of neutral peptide Mr(calc):** 1015.566193

**Fixed modifications:** Carbamidomethyl (C)

**Variable modifications:**

**N-term :** Dimethyl (N-term)

**Ions Score:** 43 **Expect:** 0.023

**Matches (Bold Red):** 13/88 fragment ions using 45 most intense peaks

| # | b                 | b <sup>++</sup> | b <sup>*</sup> | b <sup>*++</sup> | b <sup>0</sup> | b <sup>0++</sup> | Seq. | y                 | y <sup>++</sup> | y <sup>*</sup> | y <sup>*++</sup> | y <sup>0</sup> | y <sup>0++</sup> | # |
|---|-------------------|-----------------|----------------|------------------|----------------|------------------|------|-------------------|-----------------|----------------|------------------|----------------|------------------|---|
| 1 | 116.070600        | 58.538938       |                |                  | 98.060035      | 49.533656        | S    |                   |                 |                |                  |                |                  | 9 |
| 2 | <b>187.107714</b> | 94.057495       |                |                  | 169.097149     | 85.052212        | A    | <b>901.510157</b> | 451.258717      | 884.483608     | 442.745442       | 883.499592     | 442.253434       | 8 |
| 3 | <b>300.191778</b> | 150.599527      |                |                  | 282.181213     | 141.594245       | I    | <b>830.473043</b> | 415.740160      | 813.446494     | 407.226885       | 812.462478     | 406.734877       | 7 |
| 4 | 414.234705        | 207.620991      | 397.208156     | 199.107716       | 396.224140     | 198.615708       | N    | <b>717.388979</b> | 359.198128      | 700.362430     | 350.684853       | 699.378414     | 350.192845       | 6 |
| 5 | <b>543.277298</b> | 272.142287      | 526.250749     | 263.629013       | 525.266733     | 263.137005       | E    | <b>603.346052</b> | 302.176664      | 586.319503     | 293.663389       | 585.335487     | 293.171381       | 5 |
| 6 | <b>642.345712</b> | 321.676494      | 625.319163     | 313.163220       | 624.335147     | 312.671212       | V    | <b>474.303459</b> | 237.655367      | 457.276910     | 229.142093       | 456.292894     | 228.650085       | 4 |
| 7 | <b>741.414126</b> | 371.210701      | 724.387577     | 362.697427       | 723.403561     | 362.205419       | V    | <b>375.235045</b> | 188.121160      | 358.208496     | 179.607886       | 357.224480     | 179.115878       | 3 |
| 8 | 842.461805        | 421.734541      | 825.435256     | 413.221266       | 824.451240     | 412.729258       | T    | <b>276.166631</b> | 138.586953      | 259.140082     | 130.073679       | 258.156066     | 129.581671       | 2 |
| 9 |                   |                 |                |                  |                |                  | R    | <b>175.118952</b> | 88.063114       | 158.092403     | 79.549839        |                |                  | 1 |

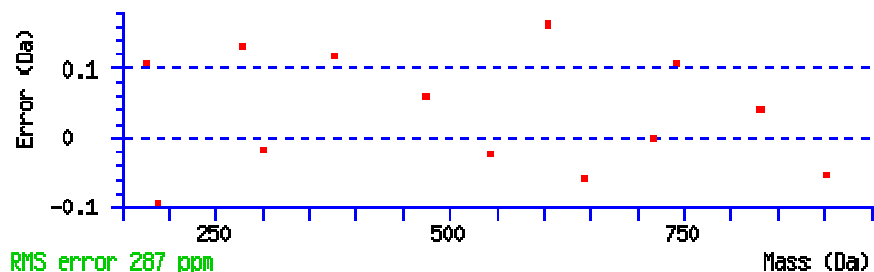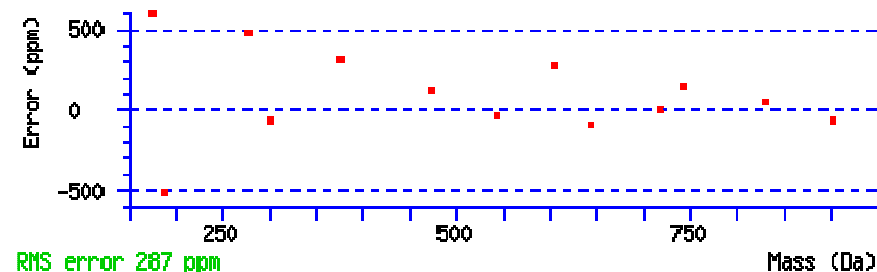

All matches to this query

| Score | Mr(calc):   | Delta     | Sequence                  |
|-------|-------------|-----------|---------------------------|
| 42.7  | 1015.566193 | 0.002333  | <a href="#">SAINEVVTR</a> |
| 25.7  | 1015.570190 | -0.001664 | <a href="#">SALIEHYK</a>  |
| 12.4  | 1015.577408 | -0.008882 | <a href="#">ASLISEGRR</a> |
| 12.4  | 1015.570221 | -0.001695 | <a href="#">WLEASVVGK</a> |
| 11.8  | 1013.557938 | 2.010588  | <a href="#">IALCIDGPK</a> |
| 10.2  | 1013.569168 | 1.999358  | <a href="#">ALLLPQMR</a>  |
| 9.6   | 1013.554581 | 2.013945  | <a href="#">ALYVVHPTS</a> |
| 9.3   | 1013.565811 | 2.002715  | <a href="#">LVHANFGTK</a> |
| 8.6   | 1014.564423 | 1.004103  | <a href="#">NVCLQLR</a>   |
| 8.3   | 1015.577408 | -0.008882 | <a href="#">KTREVAER</a>  |



MS/MS Fragmentation of **SANAEDAQEFSDVER**

Found in **IPI00010214.1**, Tax\_Id=9606 Gene\_Symbol=S100A14 Protein S100-A14

Match to Query 5887: 1694.745942 from(848.380247,2+)

Title: Elution from: 26.91 to 30.86 period: FD070412dMavril06.raw experiment: 1 cycles: 1 precIntensity: 221872.5 FinneganScanNumber: 1706

Data file D:\projecttemp\FD080412dM\FD070412dMavril06.msm

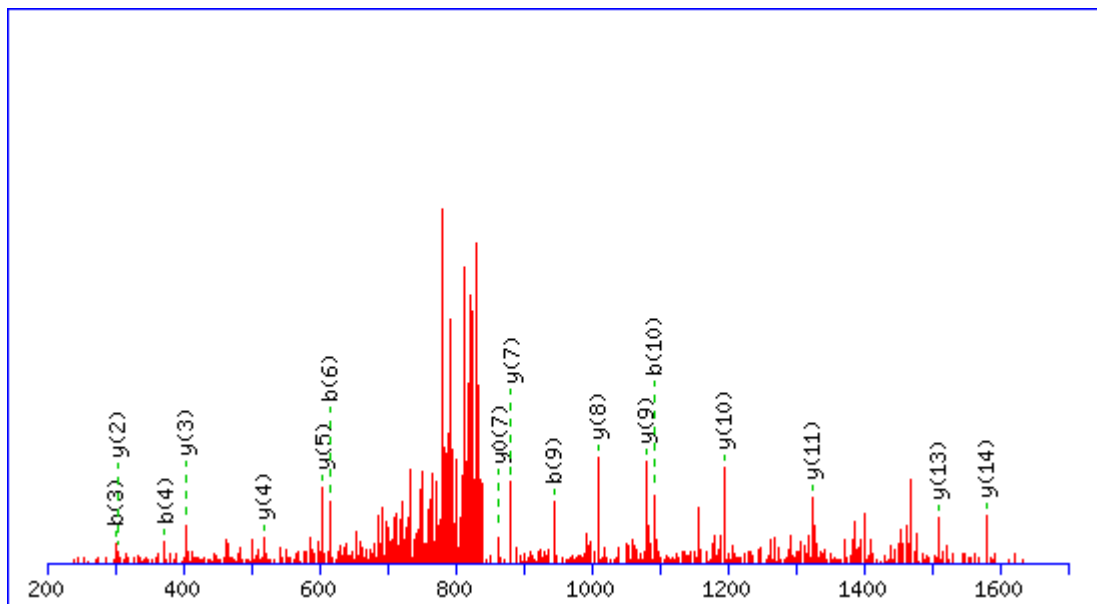

**Monoisotopic mass of neutral peptide Mr(calc):** 1694.738342

**Fixed modifications:** Carbamidomethyl (C)

**Variable modifications:**

**N-term :** Dimethyl (N-term)

**Ions Score:** 80 **Expect:** 6.3e-07

**Matches (Bold Red):** 17/162 fragment ions using 36 most intense peaks

| #  | b           | b <sup>++</sup> | b <sup>*</sup> | b <sup>*++</sup> | b <sup>0</sup> | b <sup>0++</sup> | Seq. | y           | y <sup>++</sup> | y <sup>*</sup> | y <sup>*++</sup> | y <sup>0</sup> | y <sup>0++</sup> | #  |
|----|-------------|-----------------|----------------|------------------|----------------|------------------|------|-------------|-----------------|----------------|------------------|----------------|------------------|----|
| 1  | 116.070600  | 58.538938       |                |                  | 98.060035      | 49.533656        | S    |             |                 |                |                  |                |                  | 15 |
| 2  | 187.107714  | 94.057495       |                |                  | 169.097149     | 85.052212        | A    | 1580.682320 | 790.844798      | 1563.655771    | 782.331524       | 1562.671755    | 781.839516       | 14 |
| 3  | 301.150641  | 151.078958      | 284.124092     | 142.565684       | 283.140076     | 142.073676       | N    | 1509.645206 | 755.326241      | 1492.618657    | 746.812967       | 1491.634641    | 746.320959       | 13 |
| 4  | 372.187755  | 186.597515      | 355.161206     | 178.084241       | 354.177190     | 177.592233       | A    | 1395.602279 | 698.304778      | 1378.575730    | 689.791503       | 1377.591714    | 689.299495       | 12 |
| 5  | 501.230348  | 251.118812      | 484.203799     | 242.605537       | 483.219783     | 242.113529       | E    | 1324.565165 | 662.786221      | 1307.538616    | 654.272946       | 1306.554600    | 653.780938       | 11 |
| 6  | 616.257291  | 308.632284      | 599.230742     | 300.119009       | 598.246726     | 299.627001       | D    | 1195.522572 | 598.264924      | 1178.496023    | 589.751650       | 1177.512007    | 589.259642       | 10 |
| 7  | 687.294405  | 344.150841      | 670.267856     | 335.637566       | 669.283840     | 335.145558       | A    | 1080.495629 | 540.751453      | 1063.469080    | 532.238178       | 1062.485064    | 531.746170       | 9  |
| 8  | 815.352983  | 408.180130      | 798.326434     | 399.666855       | 797.342418     | 399.174847       | Q    | 1009.458515 | 505.232896      | 992.431966     | 496.719621       | 991.447950     | 496.227613       | 8  |
| 9  | 944.395576  | 472.701426      | 927.369027     | 464.188152       | 926.385011     | 463.696144       | E    | 881.399937  | 441.203607      | 864.373388     | 432.690332       | 863.389372     | 432.198324       | 7  |
| 10 | 1091.463990 | 546.235633      | 1074.437441    | 537.722359       | 1073.453425    | 537.230351       | F    | 752.357344  | 376.682310      | 735.330795     | 368.169036       | 734.346779     | 367.677028       | 6  |
| 11 | 1178.496018 | 589.751647      | 1161.469469    | 581.238373       | 1160.485453    | 580.746365       | S    | 605.288930  | 303.148103      | 588.262381     | 294.634829       | 587.278365     | 294.142821       | 5  |
| 12 | 1293.522961 | 647.265119      | 1276.496412    | 638.751844       | 1275.512396    | 638.259836       | D    | 518.256902  | 259.632089      | 501.230353     | 251.118815       | 500.246337     | 250.626807       | 4  |
| 13 | 1392.591375 | 696.799326      | 1375.564826    | 688.286051       | 1374.580810    | 687.794043       | V    | 403.229959  | 202.118617      | 386.203410     | 193.605343       | 385.219394     | 193.113335       | 3  |
| 14 | 1521.633968 | 761.320622      | 1504.607419    | 752.807348       | 1503.623403    | 752.315340       | E    | 304.161545  | 152.584410      | 287.134996     | 144.071136       | 286.150980     | 143.579128       | 2  |
| 15 |             |                 |                |                  |                |                  | R    | 175.118952  | 88.063114       | 158.092403     | 79.549839        |                |                  | 1  |

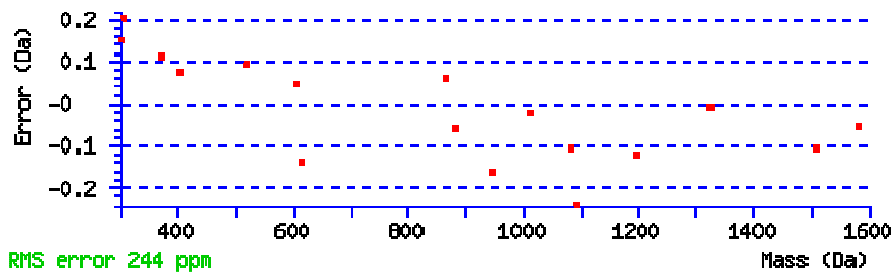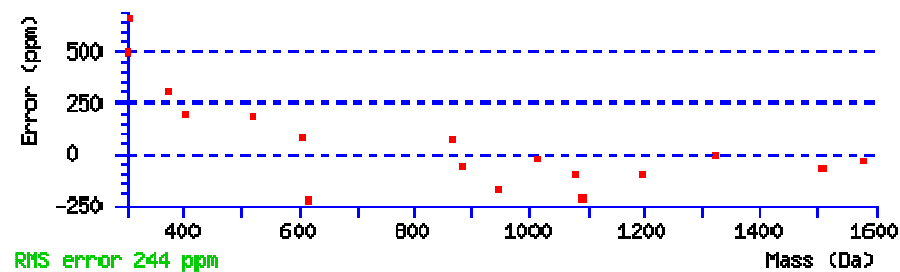

All matches to this query

| Score | Mr(calc):   | Delta    | Sequence                        |
|-------|-------------|----------|---------------------------------|
| 80.0  | 1694.738342 | 0.007600 | <a href="#">SANAEDAQEFSDVER</a> |
| 1.4   | 1693.754318 | 0.991624 | <a href="#">NNDLQDNYLSEQNK</a>  |

MS/MS Fragmentation of **SLGTDLMNEMR**

Found in **IPI00217561.2**, Tax\_Id=9606 Gene\_Symbol=ITGB1 Isoform Beta-1C of Integrin beta-1

Match to Query 5219: 1309.608762 from(655.811657,2+)

Title: Elution from: 32.20 to 36.07 period: FD070412dMavril02.raw experiment: 1 cycles: 1 precIntensity: 474825.5 FinneganScanNumber: 2189

Data file D:\projectemp\FD080412dM\FD070412dMavril02.msm

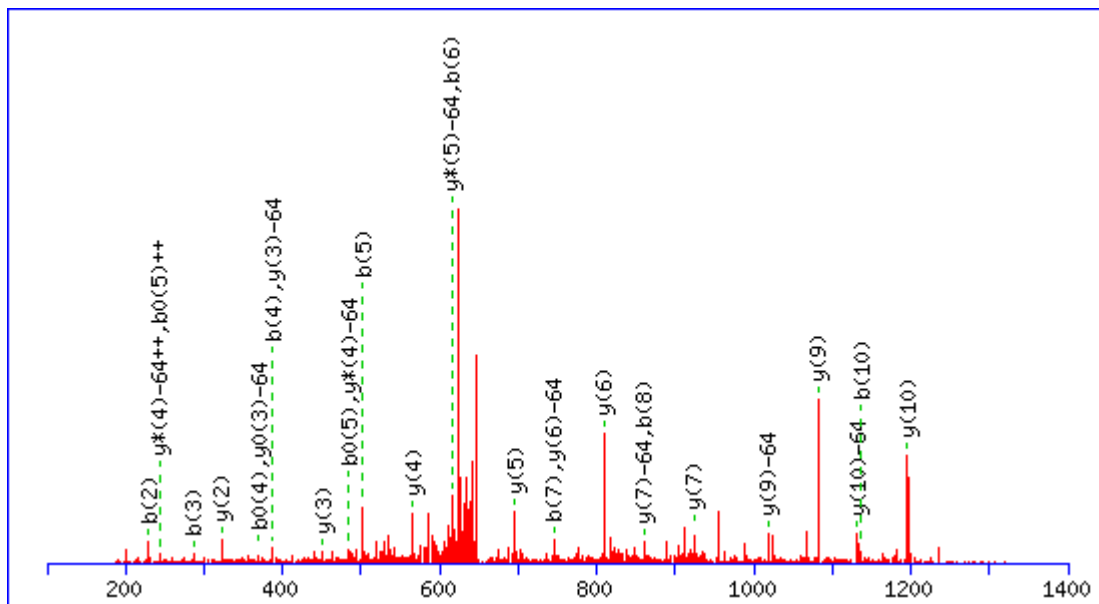

**Monoisotopic mass of neutral peptide Mr(calc):** 1309.600601

**Fixed modifications:** Carbamidomethyl (C)

**Variable modifications:**

**N-term :** Dimethyl (N-term)

**M10 :** Oxidation (M), with neutral losses 0.000000(shown in table), 63.998285

**Ions Score:** 44 **Expect:** 0.0062

**Matches (Bold Red):** 28/160 fragment ions using 60 most intense peaks

| #  | b                  | b <sup>++</sup> | b*          | b <sup>*++</sup> | b <sup>0</sup>    | b <sup>0++</sup>  | Seq. | y                  | y <sup>++</sup> | y*          | y <sup>*++</sup> | y <sup>0</sup> | y <sup>0++</sup> | #  |
|----|--------------------|-----------------|-------------|------------------|-------------------|-------------------|------|--------------------|-----------------|-------------|------------------|----------------|------------------|----|
| 1  | 116.070600         | 58.538938       |             |                  | 98.060035         | 49.533656         | S    |                    |                 |             |                  |                |                  | 11 |
| 2  | <b>229.154664</b>  | 115.080970      |             |                  | 211.144099        | 106.075687        | L    | <b>1195.544575</b> | 598.275925      | 1178.518026 | 589.762651       | 1177.534010    | 589.270643       | 10 |
| 3  | <b>286.176128</b>  | 143.591702      |             |                  | 268.165563        | 134.586419        | G    | <b>1082.460511</b> | 541.733894      | 1065.433962 | 533.220619       | 1064.449946    | 532.728611       | 9  |
| 4  | <b>387.223807</b>  | 194.115541      |             |                  | <b>369.213242</b> | 185.110259        | T    | 1025.439047        | 513.223162      | 1008.412498 | 504.709887       | 1007.428482    | 504.217879       | 8  |
| 5  | <b>502.250750</b>  | 251.629013      |             |                  | <b>484.240185</b> | <b>242.623730</b> | D    | <b>924.391368</b>  | 462.699322      | 907.364819  | 454.186048       | 906.380803     | 453.694040       | 7  |
| 6  | <b>615.334814</b>  | 308.171045      |             |                  | 597.324249        | 299.165763        | L    | <b>809.364425</b>  | 405.185851      | 792.337876  | 396.672576       | 791.353860     | 396.180568       | 6  |
| 7  | <b>746.375299</b>  | 373.691288      |             |                  | 728.364734        | 364.686005        | M    | <b>696.280361</b>  | 348.643819      | 679.253812  | 340.130544       | 678.269796     | 339.638536       | 5  |
| 8  | <b>860.418226</b>  | 430.712751      | 843.391677  | 422.199477       | 842.407661        | 421.707469        | N    | <b>565.239876</b>  | 283.123576      | 548.213327  | 274.610301       | 547.229311     | 274.118293       | 4  |
| 9  | 989.460819         | 495.234048      | 972.434270  | 486.720773       | 971.450254        | 486.228765        | E    | <b>451.196949</b>  | 226.102112      | 434.170400  | 217.588838       | 433.186384     | 217.096830       | 3  |
| 10 | <b>1136.496223</b> | 568.751750      | 1119.469674 | 560.238475       | 1118.485658       | 559.746467        | M    | <b>322.154356</b>  | 161.580816      | 305.127807  | 153.067541       |                |                  | 2  |
| 11 |                    |                 |             |                  |                   |                   | R    | 175.118952         | 88.063114       | 158.092403  | 79.549839        |                |                  | 1  |

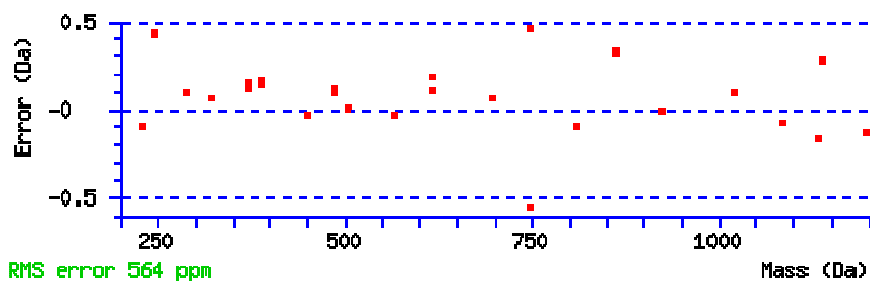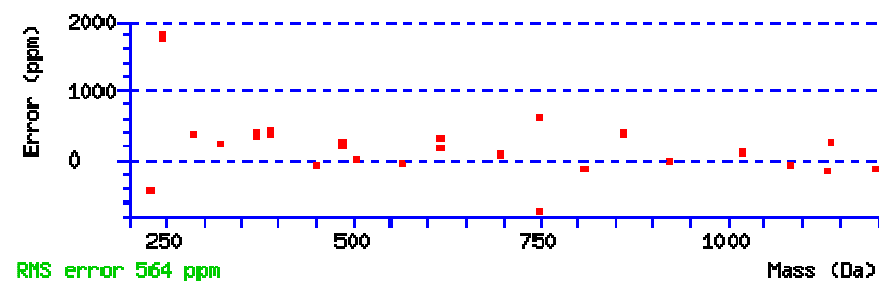

#### All matches to this query

| Score | Mr(calc):   | Delta    | Sequence                     |
|-------|-------------|----------|------------------------------|
| 43.5  | 1309.600601 | 0.008161 | <a href="#">SLGTDLMNEMR</a>  |
| 18.9  | 1309.600601 | 0.008161 | <a href="#">SLGTDLMNEMR</a>  |
| 5.7   | 1308.613220 | 0.995542 | <a href="#">YRPDLVDMER</a>   |
| 4.7   | 1307.596191 | 2.012571 | <a href="#">IICDGSASMOAR</a> |
| 4.7   | 1309.600601 | 0.008161 | <a href="#">NIKQEDTCMK</a>   |
| 4.4   | 1309.597275 | 0.011487 | <a href="#">EGFDVCTDVIR</a>  |
| 3.0   | 1309.600586 | 0.008176 | <a href="#">AADMGNLKAMEK</a> |
| 1.4   | 1307.610107 | 1.998655 | <a href="#">IIPDCSMESTK</a>  |

MS/MS Fragmentation of **TALIHDLAR**

Found in **IPI00013917.2**, Tax\_Id=9606 Gene\_Symbol=RPS12 40S ribosomal protein S12

Match to Query 3864: 1093.628652 from(365.550160,3+)

Title: Elution from: 24.98 to 28.90 period: FD070412dMavril06.raw experiment: 1 cycles: 1 precIntensity: 1294682.5 FinneganScanNumber: 1552

Data file D:\projecttemp\FD080412dM\FD070412dMavril06.msm

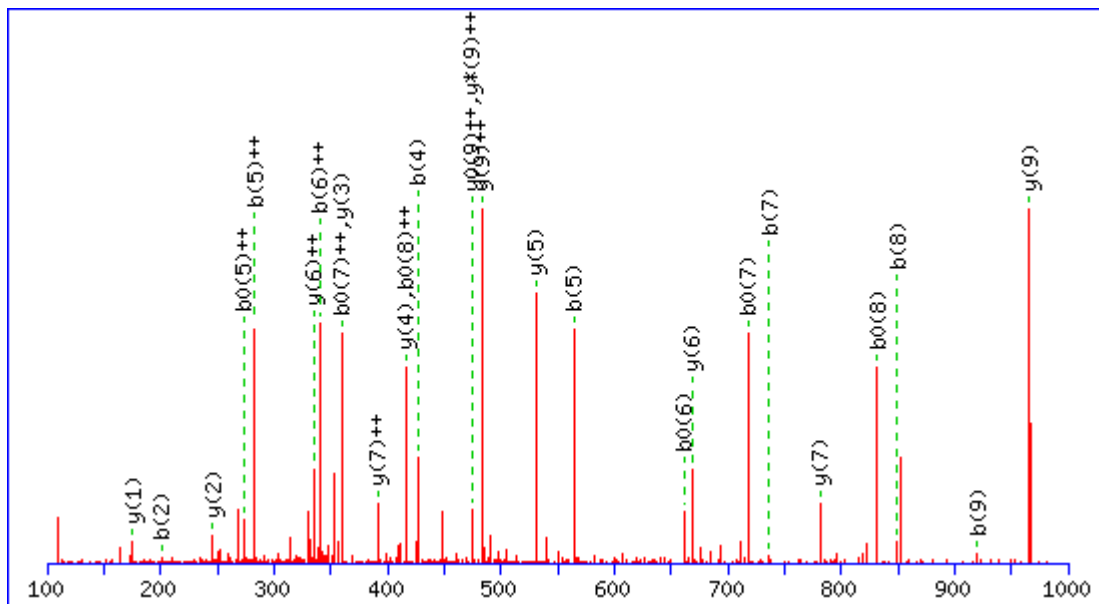

**Monoisotopic mass of neutral peptide Mr(calc):** 1093.624374

**Fixed modifications:** Carbamidomethyl (C)

**Variable modifications:**

**N-term :** Dimethyl (N-term)

**Ions Score:** 52 **Expect:** 0.0016

**Matches (Bold Red):** 27/82 fragment ions using 45 most intense peaks



| #  | b                 | b <sup>++</sup>   | b <sup>0</sup>    | b <sup>0++</sup>  | Seq. | y                 | y <sup>++</sup>   | y*         | y <sup>*++</sup>  | y <sup>0</sup> | y <sup>0++</sup>  | #  |
|----|-------------------|-------------------|-------------------|-------------------|------|-------------------|-------------------|------------|-------------------|----------------|-------------------|----|
| 1  | 130.086251        | 65.546763         | 112.075686        | 56.541481         | T    |                   |                   |            |                   |                |                   | 10 |
| 2  | <b>201.123365</b> | 101.065320        | 183.112800        | 92.060038         | A    | <b>965.552691</b> | <b>483.279984</b> | 948.526142 | <b>474.766709</b> | 947.542126     | <b>474.274701</b> | 9  |
| 3  | 314.207429        | 157.607352        | 296.196864        | 148.602070        | L    | 894.515577        | 447.761427        | 877.489028 | 439.248152        | 876.505012     | 438.756144        | 8  |
| 4  | <b>427.291493</b> | 214.149384        | 409.280928        | 205.144102        | I    | <b>781.431513</b> | <b>391.219395</b> | 764.404964 | 382.706120        | 763.420948     | 382.214112        | 7  |
| 5  | <b>564.350405</b> | <b>282.678841</b> | 546.339840        | <b>273.673558</b> | H    | <b>668.347449</b> | <b>334.677363</b> | 651.320900 | 326.164088        | 650.336884     | 325.672080        | 6  |
| 6  | 679.377348        | <b>340.192312</b> | <b>661.366783</b> | 331.187029        | D    | <b>531.288537</b> | 266.147907        | 514.261988 | 257.634632        | 513.277972     | 257.142624        | 5  |
| 7  | <b>736.398812</b> | 368.703044        | <b>718.388247</b> | <b>359.697762</b> | G    | <b>416.261594</b> | 208.634435        | 399.235045 | 200.121161        |                |                   | 4  |
| 8  | <b>849.482876</b> | 425.245076        | <b>831.472311</b> | <b>416.239794</b> | L    | <b>359.240130</b> | 180.123703        | 342.213581 | 171.610429        |                |                   | 3  |
| 9  | <b>920.519990</b> | 460.763633        | 902.509425        | 451.758351        | A    | <b>246.156066</b> | 123.581671        | 229.129517 | 115.068397        |                |                   | 2  |
| 10 |                   |                   |                   |                   | R    | <b>175.118952</b> | 88.063114         | 158.092403 | 79.549840         |                |                   | 1  |

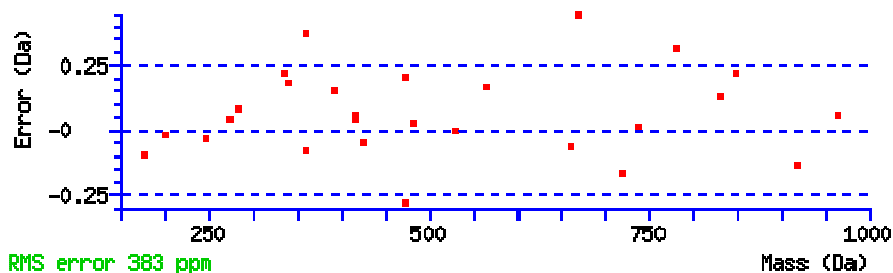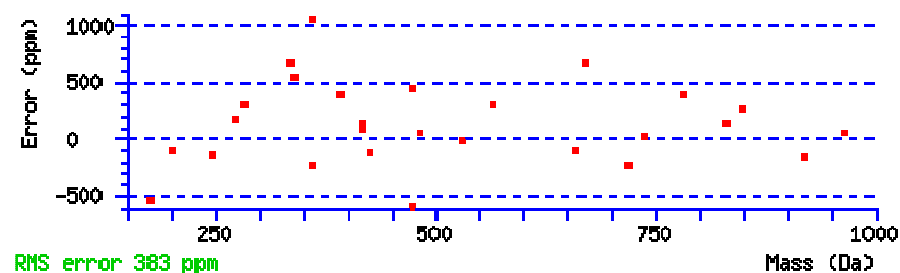

All matches to this query

| Score | Mr(calc):   | Delta     | Sequence                   |
|-------|-------------|-----------|----------------------------|
| 52.0  | 1093.624374 | 0.004278  | <a href="#">TALIHDGLAR</a> |
| 14.3  | 1091.622665 | 2.005987  | <a href="#">VXTSFGDAIK</a> |
| 11.0  | 1092.629120 | 0.999532  | <a href="#">VLASYQKTR</a>  |
| 10.6  | 1093.624390 | 0.004262  | <a href="#">TVLVADHLAR</a> |
| 10.1  | 1093.624359 | 0.004293  | <a href="#">HLNSLGNLAK</a> |
| 9.7   | 1093.635574 | -0.006922 | <a href="#">EHLRERAK</a>   |
| 8.9   | 1093.623871 | 0.004781  | <a href="#">EMKISMKK</a>   |
| 8.7   | 1093.624359 | 0.004293  | <a href="#">REIPPGIER</a>  |
| 8.4   | 1091.629837 | 1.998815  | <a href="#">KRSASTISK</a>  |

|     |             |          |                           |
|-----|-------------|----------|---------------------------|
| 8.1 | 1092.629105 | 0.999547 | <a href="#">KEKHVEPAK</a> |
|-----|-------------|----------|---------------------------|

MS/MS Fragmentation of **TDYNASVSPDSSGPER**

Found in **IPI00216049.1**, Tax\_Id=9606 Gene\_Symbol=HNRNPK Isoform 1 of Heterogeneous nuclear ribonucleoprotein K

Match to Query 6494: 1808.834458 from(905.424505,2+)

Title: Elution from: 27.31 to 31.25 period: FD070412dMavril04.raw experiment: 1 cycles: 1 precIntensity: 128266.1 FinneganScanNumber: 1792

Data file D:\projecttemp\FD080412dM\FD070412dMavril04.msm

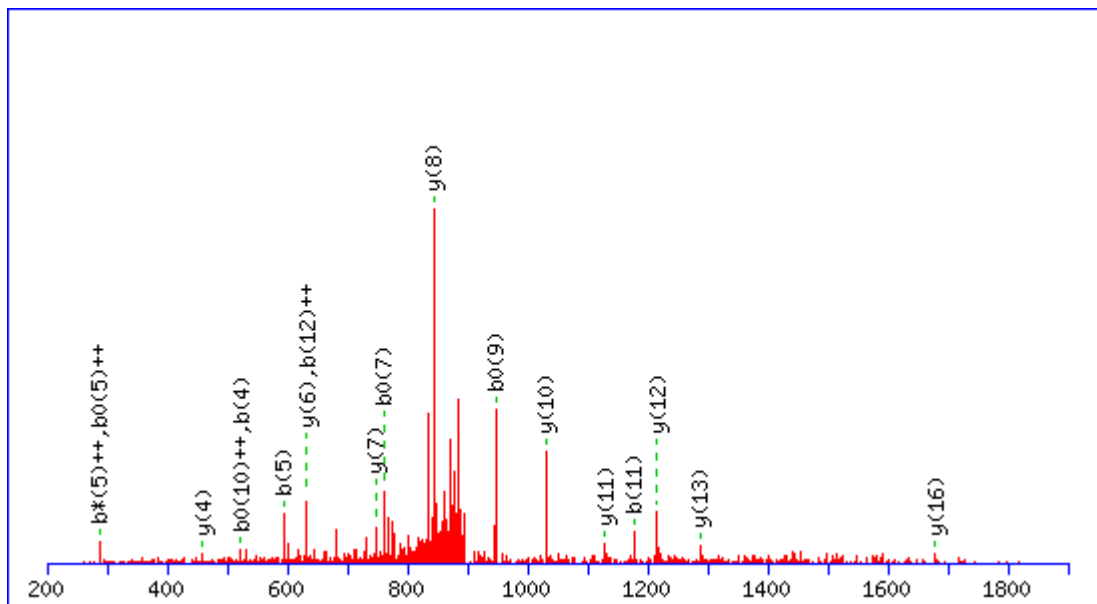

**Monoisotopic mass of neutral peptide Mr(calc):** 1807.822433

**Fixed modifications:** Carbamidomethyl (C)

**Variable modifications:**

**N-term :** Dimethyl (N-term)

**Ions Score:** 48 **Expect:** 0.0026

**Matches (Bold Red):** 18/184 fragment ions using 40 most intense peaks

| #  | b           | b <sup>++</sup> | b*          | b <sup>*++</sup> | b <sup>0</sup> | b <sup>0++</sup> | Seq. | y           | y <sup>++</sup> | y*          | y <sup>*++</sup> | y <sup>0</sup> | y <sup>0++</sup> | #  |
|----|-------------|-----------------|-------------|------------------|----------------|------------------|------|-------------|-----------------|-------------|------------------|----------------|------------------|----|
| 1  | 130.086251  | 65.546763       |             |                  | 112.075686     | 56.541481        | T    |             |                 |             |                  |                |                  | 17 |
| 2  | 245.113194  | 123.060235      |             |                  | 227.102629     | 114.054952       | D    | 1679.750733 | 840.379005      | 1662.724184 | 831.865730       | 1661.740168    | 831.373722       | 16 |
| 3  | 408.176523  | 204.591900      |             |                  | 390.165958     | 195.586617       | Y    | 1564.723790 | 782.865533      | 1547.697241 | 774.352259       | 1546.713225    | 773.860251       | 15 |
| 4  | 522.219450  | 261.613363      | 505.192901  | 253.100089       | 504.208885     | 252.608081       | N    | 1401.660461 | 701.333869      | 1384.633912 | 692.820594       | 1383.649896    | 692.328586       | 14 |
| 5  | 593.256564  | 297.131920      | 576.230015  | 288.618646       | 575.245999     | 288.126638       | A    | 1287.617534 | 644.312405      | 1270.590985 | 635.799131       | 1269.606969    | 635.307123       | 13 |
| 6  | 680.288592  | 340.647934      | 663.262043  | 332.134660       | 662.278027     | 331.642652       | S    | 1216.580420 | 608.793848      | 1199.553871 | 600.280574       | 1198.569855    | 599.788566       | 12 |
| 7  | 779.357006  | 390.182141      | 762.330457  | 381.668867       | 761.346441     | 381.176859       | V    | 1129.548392 | 565.277834      | 1112.521843 | 556.764560       | 1111.537827    | 556.272552       | 11 |
| 8  | 866.389034  | 433.698155      | 849.362485  | 425.184881       | 848.378469     | 424.692873       | S    | 1030.479978 | 515.743627      | 1013.453429 | 507.230353       | 1012.469413    | 506.738345       | 10 |
| 9  | 965.457448  | 483.232362      | 948.430899  | 474.719088       | 947.446883     | 474.227080       | V    | 943.447950  | 472.227613      | 926.421401  | 463.714339       | 925.437385     | 463.222331       | 9  |
| 10 | 1062.510212 | 531.758744      | 1045.483663 | 523.245470       | 1044.499647    | 522.753462       | P    | 844.379536  | 422.693406      | 827.352987  | 414.180132       | 826.368971     | 413.688124       | 8  |
| 11 | 1177.537155 | 589.272216      | 1160.510606 | 580.758941       | 1159.526590    | 580.266933       | D    | 747.326772  | 374.167024      | 730.300223  | 365.653750       | 729.316207     | 365.161742       | 7  |
| 12 | 1264.569183 | 632.788230      | 1247.542634 | 624.274955       | 1246.558618    | 623.782947       | S    | 632.299829  | 316.653553      | 615.273280  | 308.140278       | 614.289264     | 307.648270       | 6  |
| 13 | 1351.601211 | 676.304244      | 1334.574662 | 667.790969       | 1333.590646    | 667.298961       | S    | 545.267801  | 273.137539      | 528.241252  | 264.624264       | 527.257236     | 264.132256       | 5  |
| 14 | 1408.622675 | 704.814976      | 1391.596126 | 696.301701       | 1390.612110    | 695.809693       | G    | 458.235773  | 229.621524      | 441.209224  | 221.108250       | 440.225208     | 220.616242       | 4  |
| 15 | 1505.675439 | 753.341358      | 1488.648890 | 744.828083       | 1487.664874    | 744.336075       | P    | 401.214309  | 201.110793      | 384.187760  | 192.597518       | 383.203744     | 192.105510       | 3  |
| 16 | 1634.718032 | 817.862654      | 1617.691483 | 809.349380       | 1616.707467    | 808.857372       | E    | 304.161545  | 152.584411      | 287.134996  | 144.071136       | 286.150980     | 143.579128       | 2  |
| 17 |             |                 |             |                  |                |                  | R    | 175.118952  | 88.063114       | 158.092403  | 79.549839        |                |                  | 1  |

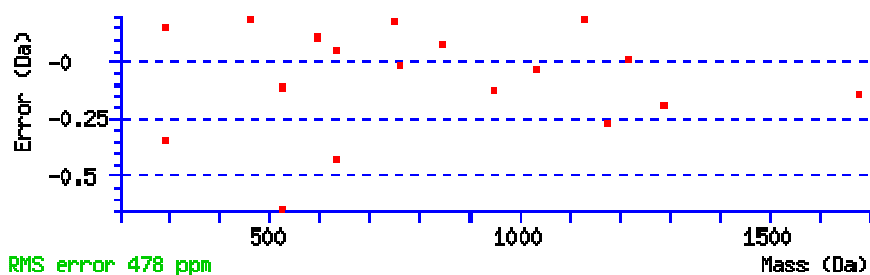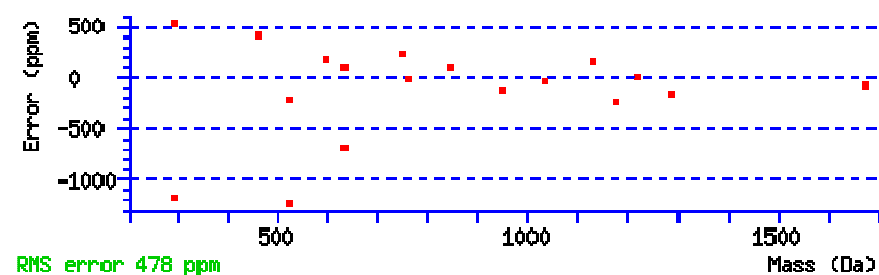

All matches to this query

| Score | Mr(calc):   | Delta    | Sequence                          |
|-------|-------------|----------|-----------------------------------|
| 48.1  | 1807.822433 | 1.012025 | <a href="#">TDYNASVSVPDSSGPER</a> |

MS/MS Fragmentation of **TFTTQETITNAETAK**

Found in **IPI00027497.5**, Tax\_Id=9606 Gene\_Symbol=GPI Glucose-6-phosphate isomerase

Match to Query 6140: 1710.874286 from(856.444419,2+)

Title: Elution from: 29.16 to 33.12 period: FD070412dMavril04.raw experiment: 1 cycles: 1 precIntensity: 1010126.3 FinneganScanNumber: 1939

Data file D:\projecttemp\FD080412dM\FD070412dMavril04.msm

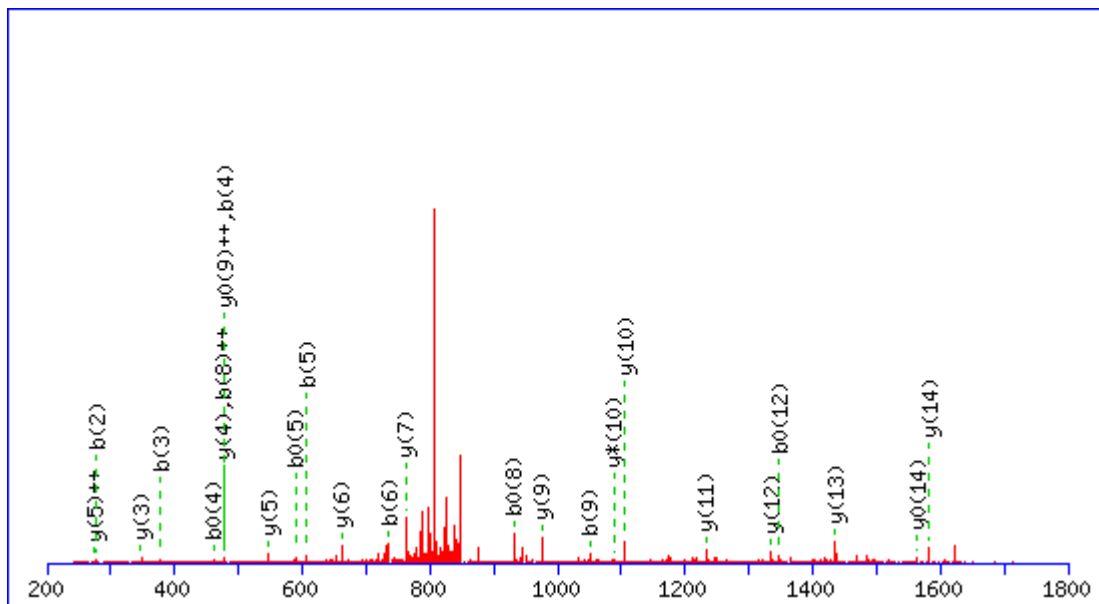

**Monoisotopic mass of neutral peptide Mr(calc):** 1710.867584

**Fixed modifications:** Carbamidomethyl (C)

**Variable modifications:**

**N-term :** Dimethyl (N-term)

**K15 :** Dimethyl (K)

**Ions Score:** 52 **Expect:** 0.002

**Matches (Bold Red):** 26/156 fragment ions using 57 most intense peaks

| #  | b                  | b <sup>++</sup>   | b*          | b <sup>*++</sup> | b <sup>0</sup>     | b <sup>0++</sup> | Seq. | y                  | y <sup>++</sup>   | y*                 | y <sup>*++</sup> | y <sup>0</sup>     | y <sup>0++</sup>  | #  |
|----|--------------------|-------------------|-------------|------------------|--------------------|------------------|------|--------------------|-------------------|--------------------|------------------|--------------------|-------------------|----|
| 1  | 130.086251         | 65.546763         |             |                  | 112.075686         | 56.541481        | T    |                    |                   |                    |                  |                    |                   | 15 |
| 2  | <b>277.154665</b>  | 139.080970        |             |                  | 259.144100         | 130.075688       | F    | <b>1582.795892</b> | 791.901584        | 1565.769343        | 783.388310       | <b>1564.785327</b> | 782.896302        | 14 |
| 3  | <b>378.202344</b>  | 189.604810        |             |                  | 360.191779         | 180.599527       | T    | <b>1435.727478</b> | 718.367377        | 1418.700929        | 709.854103       | 1417.716913        | 709.362095        | 13 |
| 4  | <b>479.250023</b>  | 240.128649        |             |                  | <b>461.239458</b>  | 231.123367       | T    | <b>1334.679799</b> | 667.843538        | 1317.653250        | 659.330263       | 1316.669234        | 658.838255        | 12 |
| 5  | <b>607.308601</b>  | 304.157939        | 590.282052  | 295.644664       | <b>589.298036</b>  | 295.152656       | Q    | <b>1233.632120</b> | 617.319698        | 1216.605571        | 608.806424       | 1215.621555        | 608.314415        | 11 |
| 6  | <b>736.351194</b>  | 368.679235        | 719.324645  | 360.165961       | 718.340629         | 359.673953       | E    | <b>1105.573542</b> | 553.290409        | <b>1088.546993</b> | 544.777135       | 1087.562977        | 544.285127        | 10 |
| 7  | 837.398873         | 419.203075        | 820.372324  | 410.689800       | 819.388308         | 410.197792       | T    | <b>976.530949</b>  | 488.769113        | 959.504400         | 480.255838       | 958.520384         | <b>479.763830</b> | 9  |
| 8  | 950.482937         | <b>475.745107</b> | 933.456388  | 467.231832       | <b>932.472372</b>  | 466.739824       | I    | 875.483270         | 438.245273        | 858.456721         | 429.731999       | 857.472705         | 429.239991        | 8  |
| 9  | <b>1051.530616</b> | 526.268946        | 1034.504067 | 517.755672       | 1033.520051        | 517.263664       | T    | <b>762.399206</b>  | 381.703241        | 745.372657         | 373.189967       | 744.388641         | 372.697959        | 7  |
| 10 | 1165.573543        | 583.290410        | 1148.546994 | 574.777135       | 1147.562978        | 574.285127       | N    | <b>661.351527</b>  | 331.179402        | 644.324978         | 322.666127       | 643.340962         | 322.174119        | 6  |
| 11 | 1236.610657        | 618.808967        | 1219.584108 | 610.295692       | 1218.600092        | 609.803684       | A    | <b>547.308600</b>  | <b>274.157938</b> | 530.282051         | 265.644664       | 529.298035         | 265.152656        | 5  |
| 12 | 1365.653250        | 683.330263        | 1348.626701 | 674.816989       | <b>1347.642685</b> | 674.324981       | E    | <b>476.271486</b>  | 238.639381        | 459.244937         | 230.126106       | 458.260921         | 229.634098        | 4  |
| 13 | 1466.700929        | 733.854103        | 1449.674380 | 725.340828       | 1448.690364        | 724.848820       | T    | <b>347.228893</b>  | 174.118085        | 330.202344         | 165.604810       | 329.218328         | 165.112802        | 3  |
| 14 | 1537.738043        | 769.372660        | 1520.711494 | 760.859385       | 1519.727478        | 760.367377       | A    | 246.181214         | 123.594245        | 229.154665         | 115.080971       |                    |                   | 2  |
| 15 |                    |                   |             |                  |                    |                  | K    | 175.144100         | 88.075688         | 158.117551         | 79.562414        |                    |                   | 1  |

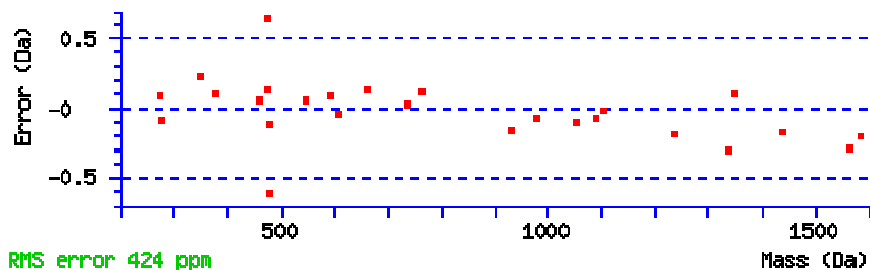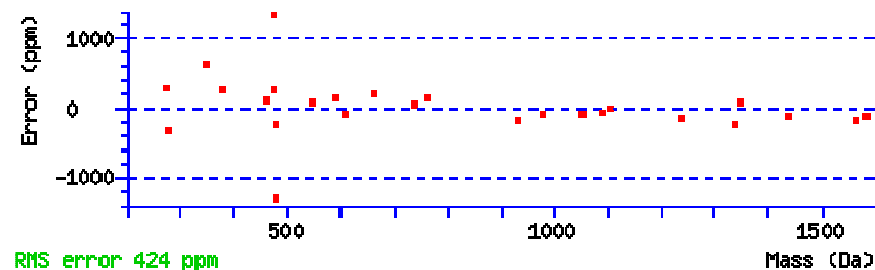

All matches to this query

| Score | Mr(calc):   | Delta    | Sequence                         |
|-------|-------------|----------|----------------------------------|
| 52.3  | 1710.867584 | 0.006702 | <a href="#">TFTTQETITNAETA</a> K |
| 7.6   | 1708.873917 | 2.000369 | <a href="#">DLMTKTPKTMATEA</a> K |
| 6.1   | 1708.873917 | 2.000369 | <a href="#">DLMTKTPKTMATEA</a> K |
| 6.0   | 1708.873917 | 2.000369 | <a href="#">DLMTKTPKTMATEA</a> K |

|     |             |           |                                  |
|-----|-------------|-----------|----------------------------------|
| 5.5 | 1709.854553 | 1.019733  | <a href="#">ELTDKFIQEMESLK</a>   |
| 4.9 | 1709.880402 | 0.993884  | <a href="#">MTLSLADRCSKTQK</a>   |
| 4.2 | 1709.857910 | 1.016376  | <a href="#">ETEMALAKDMALATK</a>  |
| 3.8 | 1710.864410 | 0.009876  | <a href="#">EVS MGLTKSKNQSMK</a> |
| 3.6 | 1710.876312 | -0.002026 | <a href="#">MTATTWLKEGPPAHK</a>  |
| 3.2 | 1710.861053 | 0.013233  | <a href="#">ADLSGMSGARDIFISK</a> |

---

MS/MS Fragmentation of **TIAQG<sub>N</sub>LSNTDVQAAK**

Found in **IPI00305383.1**, Tax\_Id=9606 Gene\_Symbol=UQCRC2 Cytochrome b-c1 complex subunit 2, mitochondrial

Match to Query 5631: 1685.900712 from(843.957632,2+)

Title: Elution from: 24.46 to 28.36 period: FD070412dMavril05.raw experiment: 1 cycles: 1 precIntensity: 75703.3 FinneganScanNumber: 1515

Data file D:\projecttemp\FD080412dM\FD070412dMavril05.msm

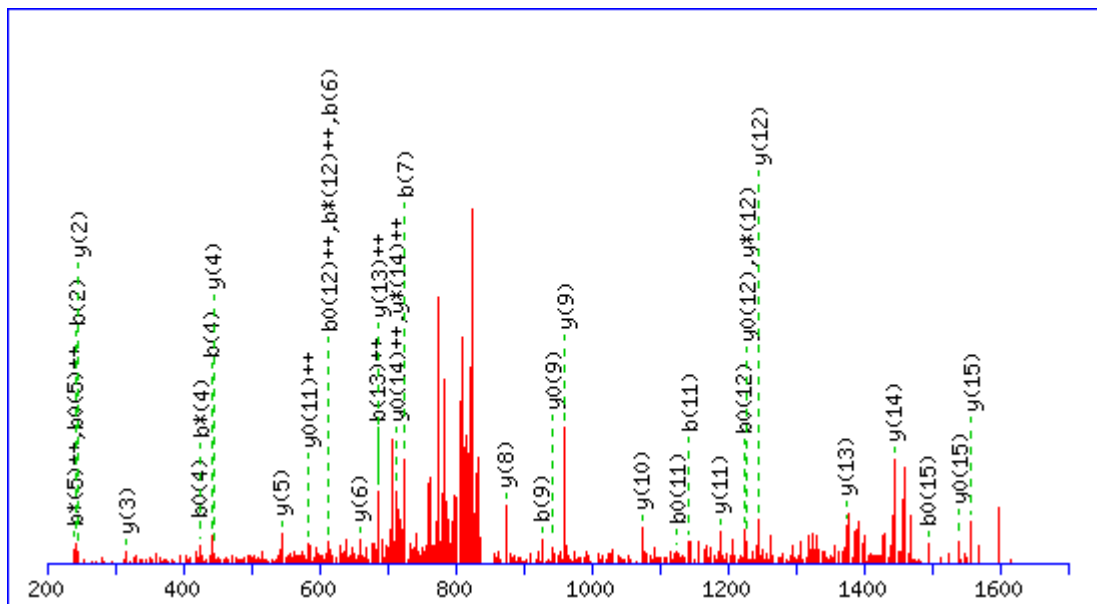

**Monoisotopic mass of neutral peptide Mr(calc):** 1685.894791

**Fixed modifications:** Carbamidomethyl (C)

**Variable modifications:**

**N-term :** Dimethyl (N-term)

**K16 :** Dimethyl (K)

**Ions Score:** 60 **Expect:** 0.00035

**Matches (Bold Red):** 37/164 fragment ions using 90 most intense peaks



| #  | b                  | b <sup>++</sup>   | b*                | b <sup>*++</sup>  | b <sup>0</sup>     | b <sup>0++</sup>  | Seq. | y                  | y <sup>++</sup>   | y*                 | y <sup>*++</sup>  | y <sup>0</sup>     | y <sup>0++</sup>  | #  |
|----|--------------------|-------------------|-------------------|-------------------|--------------------|-------------------|------|--------------------|-------------------|--------------------|-------------------|--------------------|-------------------|----|
| 1  | 130.086251         | 65.546763         |                   |                   | 112.075686         | 56.541481         | T    |                    |                   |                    |                   |                    |                   | 16 |
| 2  | <b>243.170315</b>  | 122.088795        |                   |                   | 225.159750         | 113.083513        | I    | <b>1557.823108</b> | 779.415192        | 1540.796559        | 770.901918        | <b>1539.812543</b> | 770.409910        | 15 |
| 3  | 314.207429         | 157.607352        |                   |                   | 296.196864         | 148.602070        | A    | <b>1444.739044</b> | 722.873160        | 1427.712495        | <b>714.359886</b> | 1426.728479        | <b>713.867878</b> | 14 |
| 4  | <b>442.266007</b>  | 221.636641        | <b>425.239458</b> | 213.123367        | <b>424.255442</b>  | 212.631359        | Q    | <b>1373.701930</b> | <b>687.354603</b> | 1356.675381        | 678.841329        | 1355.691365        | 678.349320        | 13 |
| 5  | 499.287471         | 250.147373        | 482.260922        | <b>241.634099</b> | 481.276906         | <b>241.142091</b> | G    | <b>1245.643352</b> | 623.325314        | <b>1228.616803</b> | 614.812040        | <b>1227.632787</b> | 614.320032        | 12 |
| 6  | <b>613.330398</b>  | 307.168837        | 596.303849        | 298.655563        | 595.319833         | 298.163555        | N    | <b>1188.621888</b> | 594.814582        | 1171.595339        | 586.301308        | 1170.611323        | <b>585.809300</b> | 11 |
| 7  | <b>726.414462</b>  | 363.710869        | 709.387913        | 355.197595        | 708.403897         | 354.705587        | L    | <b>1074.578961</b> | 537.793118        | 1057.552412        | 529.279844        | 1056.568396        | 528.787836        | 10 |
| 8  | 813.446490         | 407.226883        | 796.419941        | 398.713609        | 795.435925         | 398.221601        | S    | <b>961.494897</b>  | 481.251087        | 944.468348         | 472.737812        | <b>943.484332</b>  | 472.245804        | 9  |
| 9  | <b>927.489417</b>  | 464.248347        | 910.462868        | 455.735072        | 909.478852         | 455.243064        | N    | <b>874.462869</b>  | 437.735073        | 857.436320         | 429.221798        | 856.452304         | 428.729790        | 8  |
| 10 | 1028.537096        | 514.772186        | 1011.510547       | 506.258912        | 1010.526531        | 505.766904        | T    | 760.419942         | 380.713609        | 743.393393         | 372.200335        | 742.409377         | 371.708327        | 7  |
| 11 | <b>1143.564039</b> | 572.285658        | 1126.537490       | 563.772383        | <b>1125.553474</b> | 563.280375        | D    | <b>659.372263</b>  | 330.189770        | 642.345714         | 321.676495        | 641.361698         | 321.184487        | 6  |
| 12 | 1242.632453        | 621.819865        | 1225.605904       | <b>613.306590</b> | <b>1224.621888</b> | <b>612.814582</b> | V    | <b>544.345320</b>  | 272.676298        | 527.318771         | 264.163024        |                    |                   | 5  |
| 13 | 1370.691031        | <b>685.849154</b> | 1353.664482       | 677.335879        | 1352.680466        | 676.843871        | Q    | <b>445.276906</b>  | 223.142091        | 428.250357         | 214.628816        |                    |                   | 4  |
| 14 | 1441.728145        | 721.367711        | 1424.701596       | 712.854436        | 1423.717580        | 712.362428        | A    | <b>317.218328</b>  | 159.112802        | 300.191779         | 150.599528        |                    |                   | 3  |
| 15 | 1512.765259        | 756.886268        | 1495.738710       | 748.372993        | <b>1494.754694</b> | 747.880985        | A    | <b>246.181214</b>  | 123.594245        | 229.154665         | 115.080971        |                    |                   | 2  |
| 16 |                    |                   |                   |                   |                    |                   | K    | 175.144100         | 88.075688         | 158.117551         | 79.562414         |                    |                   | 1  |

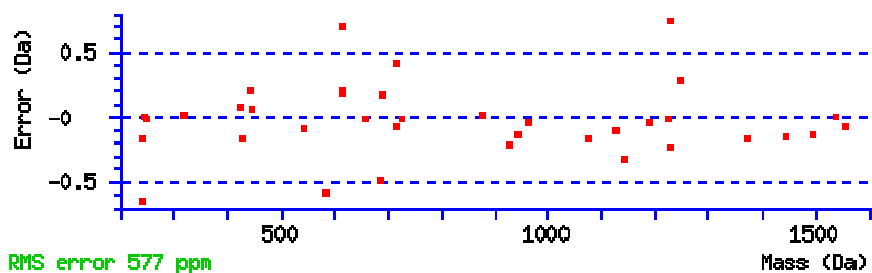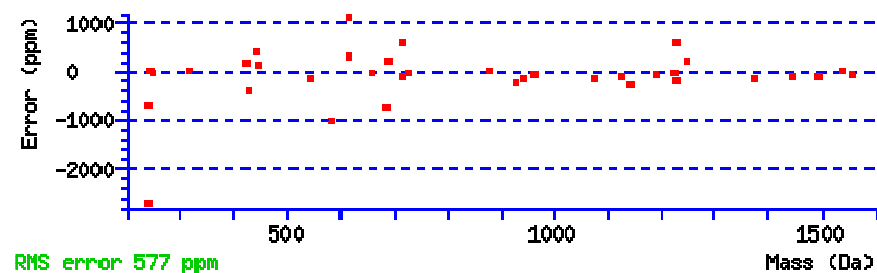

All matches to this query

| Score | Mr(calc):   | Delta     | Sequence                         |
|-------|-------------|-----------|----------------------------------|
| 60.4  | 1685.894791 | 0.005921  | <a href="#">TIAQGNSNTDVQAAK</a>  |
| 8.2   | 1685.910019 | -0.009307 | <a href="#">ELKATYREHVEAIK</a>   |
| 3.1   | 1684.893036 | 1.007676  | <a href="#">SHGGIDVKVTSMSLAR</a> |



MS/MS Fragmentation of **TLLSDPTYR**

Found in **IPI00013894.1**, Tax\_Id=9606 Gene\_Symbol=STIP1 Stress-induced-phosphoprotein 1

Match to Query 3882: 1092.582286 from(547.298419,2+)

Title: Elution from: 28.73 to 32.61 period: FD070412dMavril04.raw experiment: 1 cycles: 1 precIntensity: 924370.6 FinneganScanNumber: 1899

Data file D:\projecttemp\FD080412dM\FD070412dMavril04.msm

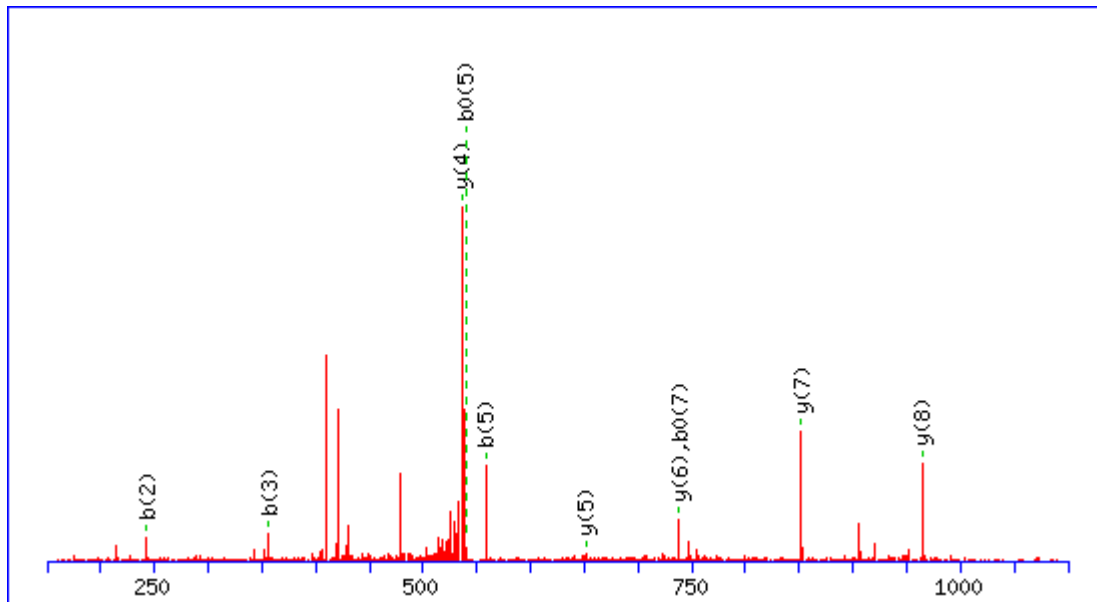

**Monoisotopic mass of neutral peptide Mr(calc):** 1092.581512

**Fixed modifications:** Carbamidomethyl (C)

**Variable modifications:**

**N-term :** Dimethyl (N-term)

**Ions Score:** 36 **Expect:** 0.11

**Matches (Bold Red):** 10/76 fragment ions using 17 most intense peaks

| # | b                 | b <sup>++</sup> | b <sup>0</sup>    | b <sup>0++</sup> | Seq. | y                 | y <sup>++</sup> | y*         | y <sup>+++</sup> | y <sup>0</sup> | y <sup>0++</sup> | # |
|---|-------------------|-----------------|-------------------|------------------|------|-------------------|-----------------|------------|------------------|----------------|------------------|---|
| 1 | 130.086251        | 65.546763       | 112.075686        | 56.541481        | T    |                   |                 |            |                  |                |                  | 9 |
| 2 | <b>243.170315</b> | 122.088795      | 225.159750        | 113.083513       | L    | <b>964.509823</b> | 482.758550      | 947.483274 | 474.245275       | 946.499258     | 473.753267       | 8 |
| 3 | <b>356.254379</b> | 178.630827      | 338.243814        | 169.625545       | L    | <b>851.425759</b> | 426.216518      | 834.399210 | 417.703243       | 833.415194     | 417.211235       | 7 |
| 4 | 443.286407        | 222.146841      | 425.275842        | 213.141559       | S    | <b>738.341695</b> | 369.674486      | 721.315146 | 361.161211       | 720.331130     | 360.669203       | 6 |
| 5 | <b>558.313350</b> | 279.660313      | <b>540.302785</b> | 270.655031       | D    | <b>651.309667</b> | 326.158472      | 634.283118 | 317.645197       | 633.299102     | 317.153189       | 5 |
| 6 | 655.366114        | 328.186695      | 637.355549        | 319.181413       | P    | <b>536.282724</b> | 268.645000      | 519.256175 | 260.131726       | 518.272159     | 259.639718       | 4 |
| 7 | 756.413793        | 378.710535      | <b>738.403228</b> | 369.705252       | T    | 439.229960        | 220.118618      | 422.203411 | 211.605344       | 421.219395     | 211.113336       | 3 |
| 8 | 919.477122        | 460.242199      | 901.466557        | 451.236917       | Y    | 338.182281        | 169.594778      | 321.155732 | 161.081504       |                |                  | 2 |
| 9 |                   |                 |                   |                  | R    | 175.118952        | 88.063114       | 158.092403 | 79.549839        |                |                  | 1 |

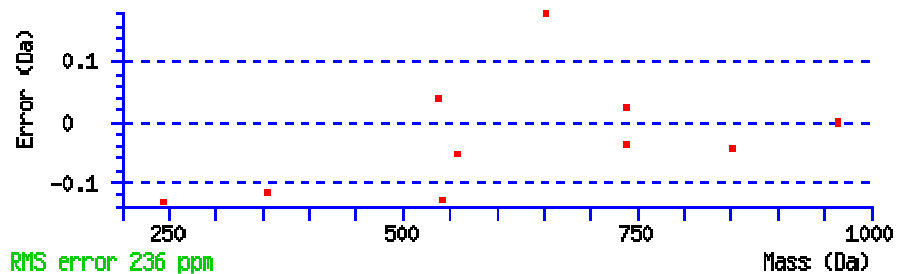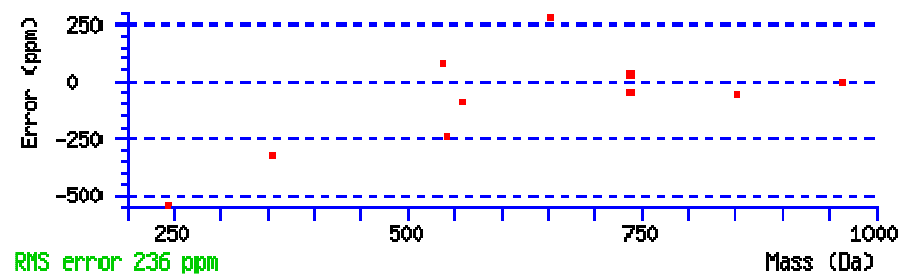

All matches to this query

| Score | Mr(calc):   | Delta     | Sequence                  |
|-------|-------------|-----------|---------------------------|
| 35.7  | 1092.581512 | 0.000774  | <a href="#">TLLSDPTYR</a> |
| 8.8   | 1092.571609 | 0.010677  | <a href="#">ELFEFRPR</a>  |
| 8.3   | 1092.592728 | -0.010442 | <a href="#">LTIYREDR</a>  |
| 7.6   | 1092.584854 | -0.002568 | <a href="#">NKLLSSEMK</a> |
| 7.0   | 1090.569214 | 2.013072  | <a href="#">ISELLSNCK</a> |
| 5.9   | 1090.577103 | 2.005183  | <a href="#">VLPDHTEPR</a> |
| 5.7   | 1092.586212 | -0.003926 | <a href="#">KEFMQVRR</a>  |
| 5.3   | 1092.592712 | -0.010426 | <a href="#">KNQNASLYK</a> |
| 5.1   | 1092.592728 | -0.010442 | <a href="#">QINSYVKNK</a> |
| 4.9   | 1090.577087 | 2.005199  | <a href="#">PEVLSHPER</a> |

MS/MS Fragmentation of **TNVNVFSELSAPR**

Found in **IPI00022624.1**, Tax\_Id=9606 Gene\_Symbol=GPRC5A Retinoic acid-induced protein 3

Match to Query 4646: 1460.769096 from(731.391824,2+)

Title: Elution from: 40.98 to 44.84 period: FD070412dMavril07.raw experiment: 1 cycles: 1 precIntensity: 2237538.7 FinneganScanNumber: 3022

Data file D:\projecttemp\FD080412dM\FD070412dMavril07.msm

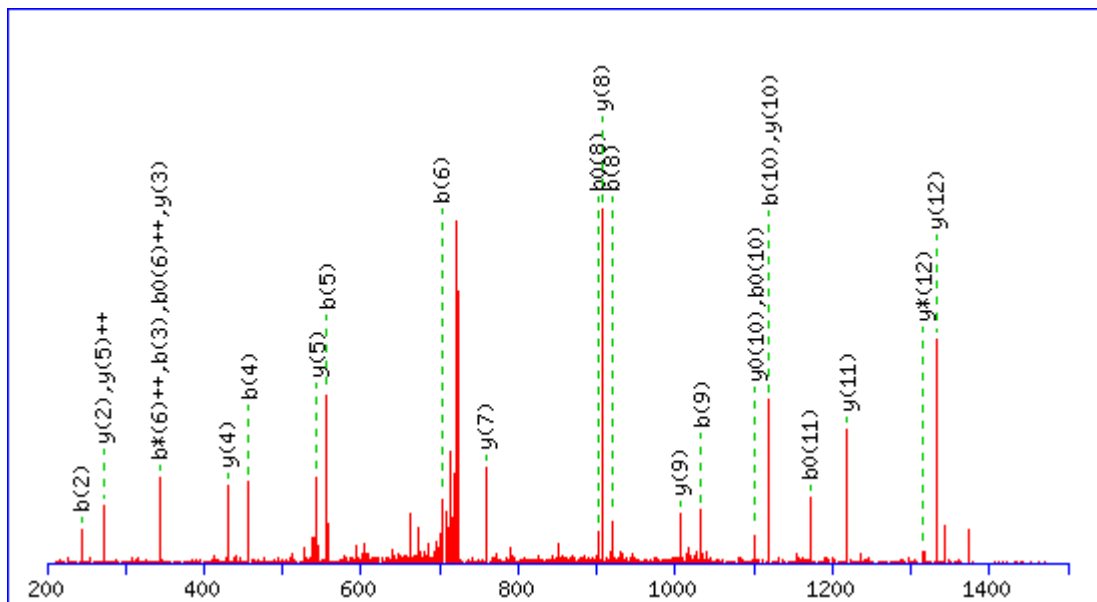

**Monoisotopic mass of neutral peptide Mr(calc):** 1460.762329

**Fixed modifications:** Carbamidomethyl (C)

**Variable modifications:**

**N-term :** Dimethyl (N-term)

**Ions Score:** 72 **Expect:** 2.7e-05

**Matches (Bold Red):** 26/136 fragment ions using 43 most intense peaks

| #  | b                  | b <sup>++</sup> | b*          | b <sup>*++</sup>  | b <sup>0</sup>     | b <sup>0++</sup>  | Seq. | y                  | y <sup>++</sup>   | y*                 | y <sup>*++</sup> | y <sup>0</sup>     | y <sup>0++</sup> | #  |
|----|--------------------|-----------------|-------------|-------------------|--------------------|-------------------|------|--------------------|-------------------|--------------------|------------------|--------------------|------------------|----|
| 1  | 130.086251         | 65.546763       |             |                   | 112.075686         | 56.541481         | T    |                    |                   |                    |                  |                    |                  | 13 |
| 2  | <b>244.129178</b>  | 122.568227      | 227.102629  | 114.054952        | 226.118613         | 113.562944        | N    | <b>1332.690639</b> | 666.848957        | <b>1315.664090</b> | 658.335683       | 1314.680074        | 657.843675       | 12 |
| 3  | <b>343.197592</b>  | 172.102434      | 326.171043  | 163.589159        | 325.187027         | 163.097151        | V    | <b>1218.647712</b> | 609.827494        | 1201.621163        | 601.314220       | 1200.637147        | 600.822211       | 11 |
| 4  | <b>457.240519</b>  | 229.123897      | 440.213970  | 220.610623        | 439.229954         | 220.118615        | N    | <b>1119.579298</b> | 560.293287        | 1102.552749        | 551.780012       | <b>1101.568733</b> | 551.288004       | 10 |
| 5  | <b>556.308933</b>  | 278.658105      | 539.282384  | 270.144830        | 538.298368         | 269.652822        | V    | <b>1005.536371</b> | 503.271823        | 988.509822         | 494.758549       | 987.525806         | 494.266541       | 9  |
| 6  | <b>703.377347</b>  | 352.192312      | 686.350798  | <b>343.679037</b> | 685.366782         | <b>343.187029</b> | F    | <b>906.467957</b>  | 453.737617        | 889.441408         | 445.224342       | 888.457392         | 444.732334       | 8  |
| 7  | 790.409375         | 395.708326      | 773.382826  | 387.195051        | 772.398810         | 386.703043        | S    | <b>759.399543</b>  | 380.203410        | 742.372994         | 371.690135       | 741.388978         | 371.198127       | 7  |
| 8  | <b>919.451968</b>  | 460.229622      | 902.425419  | 451.716347        | <b>901.441403</b>  | 451.224339        | E    | 672.367515         | 336.687396        | 655.340966         | 328.174121       | 654.356950         | 327.682113       | 6  |
| 9  | <b>1032.536032</b> | 516.771654      | 1015.509483 | 508.258379        | 1014.525467        | 507.766371        | L    | <b>543.324922</b>  | <b>272.166099</b> | 526.298373         | 263.652825       | 525.314357         | 263.160817       | 5  |
| 10 | <b>1119.568060</b> | 560.287668      | 1102.541511 | 551.774394        | <b>1101.557495</b> | 551.282386        | S    | <b>430.240858</b>  | 215.624067        | 413.214309         | 207.110792       | 412.230293         | 206.618784       | 4  |
| 11 | 1190.605174        | 595.806225      | 1173.578625 | 587.292951        | <b>1172.594609</b> | 586.800943        | A    | <b>343.208830</b>  | 172.108053        | 326.182281         | 163.594778       |                    |                  | 3  |
| 12 | 1287.657938        | 644.332607      | 1270.631389 | 635.819333        | 1269.647373        | 635.327325        | P    | <b>272.171716</b>  | 136.589496        | 255.145167         | 128.076221       |                    |                  | 2  |
| 13 |                    |                 |             |                   |                    |                   | R    | 175.118952         | 88.063114         | 158.092403         | 79.549839        |                    |                  | 1  |

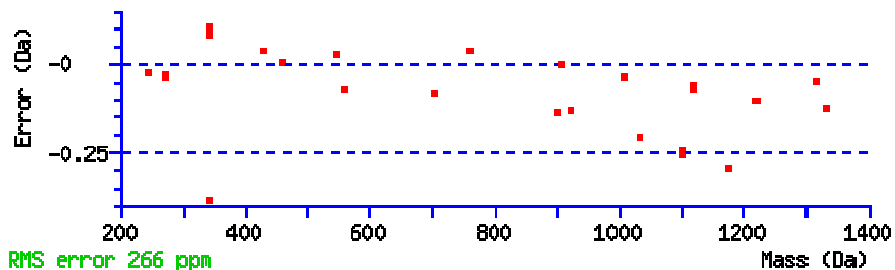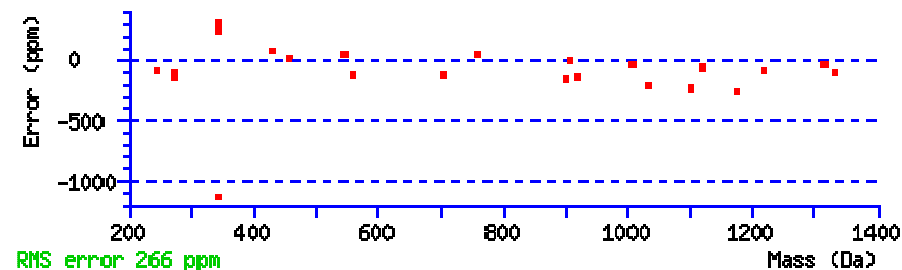

All matches to this query

| Score | Mr(cal):    | Delta     | Sequence                        |
|-------|-------------|-----------|---------------------------------|
| 72.1  | 1460.762329 | 0.006767  | <a href="#">TNVNVFSELSAPR</a>   |
| 10.2  | 1460.783478 | -0.014382 | <a href="#">TQKSGTGATATVSPK</a> |
| 8.3   | 1460.783478 | -0.014382 | <a href="#">TQKSGTGATATVSPK</a> |
| 6.8   | 1460.759155 | 0.009941  | <a href="#">GKENACARCVLK</a>    |
| 5.7   | 1460.759155 | 0.009941  | <a href="#">GKENACARCVLK</a>    |
| 5.2   | 1459.751801 | 1.017295  | <a href="#">KLVESDSDINANK</a>   |

|     |             |           |                                |
|-----|-------------|-----------|--------------------------------|
| 4.6 | 1460.765686 | 0.003410  | <a href="#">ARDKDTGEMVALK</a>  |
| 4.3 | 1460.755798 | 0.013298  | <a href="#">KDPAMVLHNSPPR</a>  |
| 4.3 | 1460.776932 | -0.007836 | <a href="#">STSGGKMKVNGAPR</a> |
| 4.0 | 1460.765717 | 0.003379  | <a href="#">VGSVLQEGCGKISK</a> |

MS/MS Fragmentation of **TTAQVLIR**

Found in **IPI00455023.6**, Tax\_Id=9606 Gene\_Symbol=tcag7.1260 Putative uncharacterized protein

Match to Query 3005: 928.568252 from(465.291402,2+)

Title: Elution from: 24.92 to 28.86 period: FD070412dMavril07.raw experiment: 1 cycles: 1 precIntensity: 5796078.4 FinneganScanNumber: 1706

Data file D:\projecttemp\FD080412dM\FD070412dMavril07.msm

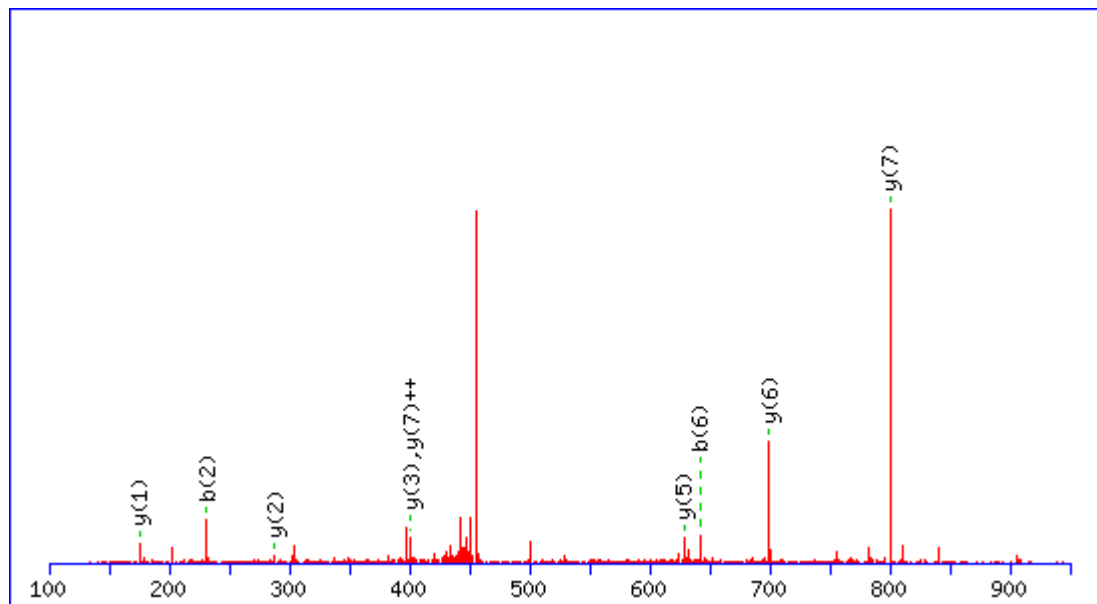

**Monoisotopic mass of neutral peptide Mr(calc):** 928.570557

**Fixed modifications:** Carbamidomethyl (C)

**Variable modifications:**

**N-term :** Dimethyl (N-term)

**Ions Score:** 41 **Expect:** 0.03

**Matches (Bold Red):** 9/66 fragment ions using 19 most intense peaks



| # | b                 | b <sup>++</sup> | b <sup>*</sup> | b <sup>*++</sup> | b <sup>0</sup> | b <sup>0++</sup> | Seq. | y                 | y <sup>++</sup>   | y <sup>*</sup> | y <sup>*++</sup> | y <sup>0</sup> | y <sup>0++</sup> | # |
|---|-------------------|-----------------|----------------|------------------|----------------|------------------|------|-------------------|-------------------|----------------|------------------|----------------|------------------|---|
| 1 | 130.086251        | 65.546763       |                |                  | 112.075686     | 56.541481        | T    |                   |                   |                |                  |                |                  | 8 |
| 2 | <b>231.133930</b> | 116.070603      |                |                  | 213.123365     | 107.065320       | T    | <b>800.498865</b> | <b>400.753071</b> | 783.472316     | 392.239796       | 782.488300     | 391.747788       | 7 |
| 3 | 302.171044        | 151.589160      |                |                  | 284.160479     | 142.583877       | A    | <b>699.451186</b> | 350.229231        | 682.424637     | 341.715957       |                |                  | 6 |
| 4 | 430.229622        | 215.618449      | 413.203073     | 207.105175       | 412.219057     | 206.613167       | Q    | <b>628.414072</b> | 314.710674        | 611.387523     | 306.197400       |                |                  | 5 |
| 5 | 529.298036        | 265.152656      | 512.271487     | 256.639382       | 511.287471     | 256.147374       | V    | 500.355494        | 250.681385        | 483.328945     | 242.168110       |                |                  | 4 |
| 6 | <b>642.382100</b> | 321.694688      | 625.355551     | 313.181414       | 624.371535     | 312.689406       | L    | <b>401.287080</b> | 201.147178        | 384.260531     | 192.633903       |                |                  | 3 |
| 7 | 755.466164        | 378.236720      | 738.439615     | 369.723446       | 737.455599     | 369.231438       | I    | <b>288.203016</b> | 144.605146        | 271.176467     | 136.091871       |                |                  | 2 |
| 8 |                   |                 |                |                  |                |                  | R    | <b>175.118952</b> | 88.063114         | 158.092403     | 79.549839        |                |                  | 1 |

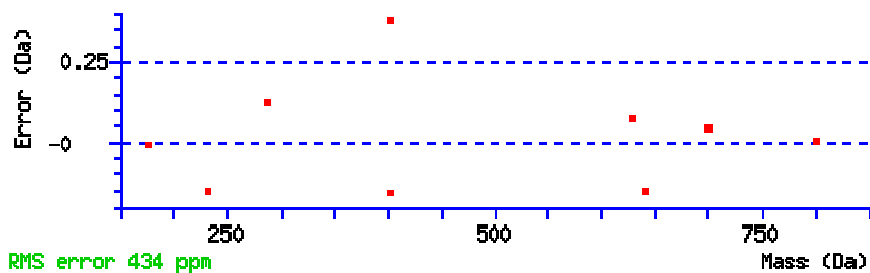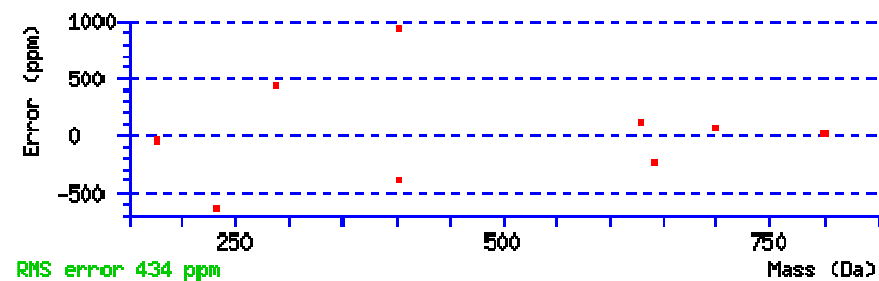

#### All matches to this query

| Score | Mr(calc):  | Delta     | Sequence                 |
|-------|------------|-----------|--------------------------|
| 40.8  | 928.570557 | -0.002305 | <a href="#">TTAQVLIR</a> |
| 32.6  | 928.559311 | 0.008941  | <a href="#">ETVAQLLK</a> |
| 25.7  | 926.554886 | 2.013366  | <a href="#">SPDAKILR</a> |
| 22.3  | 926.554886 | 2.013366  | <a href="#">VTAPKAER</a> |
| 19.1  | 928.570526 | -0.002274 | <a href="#">ERDKLLK</a>  |
| 17.4  | 928.559280 | 0.008972  | <a href="#">EEKNLLK</a>  |
| 17.4  | 928.559280 | 0.008972  | <a href="#">EENKLLK</a>  |
| 17.4  | 928.559280 | 0.008972  | <a href="#">EKAEALLK</a> |
| 17.4  | 928.559296 | 0.008956  | <a href="#">EKQDLIK</a>  |
| 17.4  | 928.559280 | 0.008972  | <a href="#">ENEKLIK</a>  |

MS/MS Fragmentation of **TVEAEAAHGTVTR**

Found in **IPI00027223.2**, Tax\_Id=9606 Gene\_Symbol=IDH1 Isocitrate dehydrogenase [NADP] cytoplasmic

Match to Query 4442: 1370.705448 from(686.360000,2+)

Title: Elution from: 14.75 to 18.72 period: FD070412dMavril05.raw experiment: 1 cycles: 1 precIntensity: 0.0 FinneganScanNumber: 848

Data file D:\projecttemp\FD080412dM\FD070412dMavril05.msm

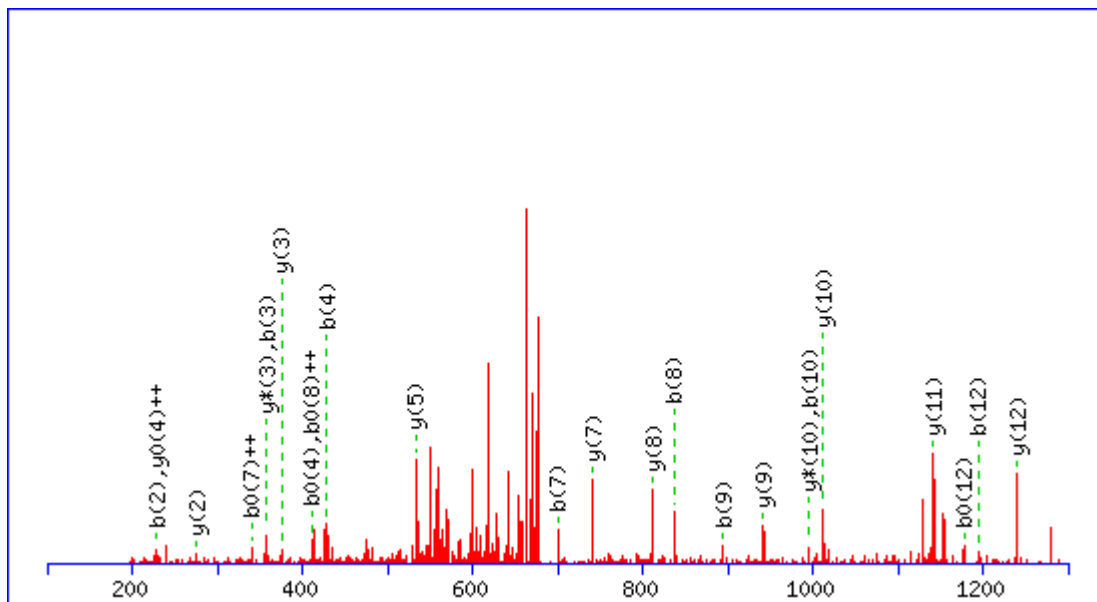

**Monoisotopic mass of neutral peptide Mr(calc):** 1368.699738

**Fixed modifications:** Carbamidomethyl (C)

**Variable modifications:**

**N-term :** Dimethyl (N-term)

**Ions Score:** 59 **Expect:** 0.00042

**Matches (Bold Red):** 24/118 fragment ions using 47 most intense peaks

| #  | b                  | b <sup>++</sup> | b <sup>0</sup>     | b <sup>0++</sup>  | Seq. | y                  | y <sup>++</sup> | y*                | y <sup>*++</sup> | y <sup>0</sup> | y <sup>0++</sup>  | #  |
|----|--------------------|-----------------|--------------------|-------------------|------|--------------------|-----------------|-------------------|------------------|----------------|-------------------|----|
| 1  | 130.086251         | 65.546763       | 112.075686         | 56.541481         | T    |                    |                 |                   |                  |                |                   | 13 |
| 2  | <b>229.154665</b>  | 115.080970      | 211.144100         | 106.075688        | V    | <b>1240.628042</b> | 620.817659      | 1223.601493       | 612.304385       | 1222.617477    | 611.812377        | 12 |
| 3  | <b>358.197258</b>  | 179.602267      | 340.186693         | 170.596984        | E    | <b>1141.559628</b> | 571.283452      | 1124.533079       | 562.770178       | 1123.549063    | 562.278169        | 11 |
| 4  | <b>429.234372</b>  | 215.120824      | <b>411.223807</b>  | 206.115541        | A    | <b>1012.517035</b> | 506.762156      | <b>995.490486</b> | 498.248881       | 994.506470     | 497.756873        | 10 |
| 5  | 558.276965         | 279.642121      | 540.266400         | 270.636838        | E    | <b>941.479921</b>  | 471.243599      | 924.453372        | 462.730324       | 923.469356     | 462.238316        | 9  |
| 6  | 629.314079         | 315.160678      | 611.303514         | 306.155395        | A    | <b>812.437328</b>  | 406.722302      | 795.410779        | 398.209028       | 794.426763     | 397.717020        | 8  |
| 7  | <b>700.351193</b>  | 350.679235      | 682.340628         | <b>341.673952</b> | A    | <b>741.400214</b>  | 371.203745      | 724.373665        | 362.690471       | 723.389649     | 362.198463        | 7  |
| 8  | <b>837.410105</b>  | 419.208690      | 819.399540         | <b>410.203408</b> | H    | 670.363100         | 335.685188      | 653.336551        | 327.171914       | 652.352535     | 326.679906        | 6  |
| 9  | <b>894.431569</b>  | 447.719423      | 876.421004         | 438.714140        | G    | <b>533.304188</b>  | 267.155732      | 516.277639        | 258.642458       | 515.293623     | 258.150450        | 5  |
| 10 | <b>995.479248</b>  | 498.243262      | 977.468683         | 489.237979        | T    | 476.282724         | 238.645000      | 459.256175        | 230.131726       | 458.272159     | <b>229.639718</b> | 4  |
| 11 | 1094.547662        | 547.777469      | 1076.537097        | 538.772187        | V    | <b>375.235045</b>  | 188.121161      | <b>358.208496</b> | 179.607886       | 357.224480     | 179.115878        | 3  |
| 12 | <b>1195.595341</b> | 598.301309      | <b>1177.584776</b> | 589.296026        | T    | <b>276.166631</b>  | 138.586953      | 259.140082        | 130.073679       | 258.156066     | 129.581671        | 2  |
| 13 |                    |                 |                    |                   | R    | 175.118952         | 88.063114       | 158.092403        | 79.549839        |                |                   | 1  |

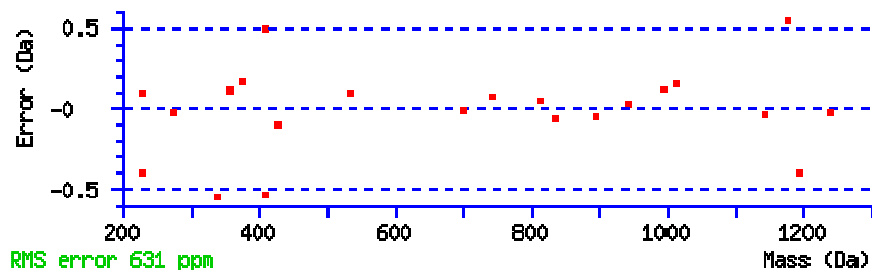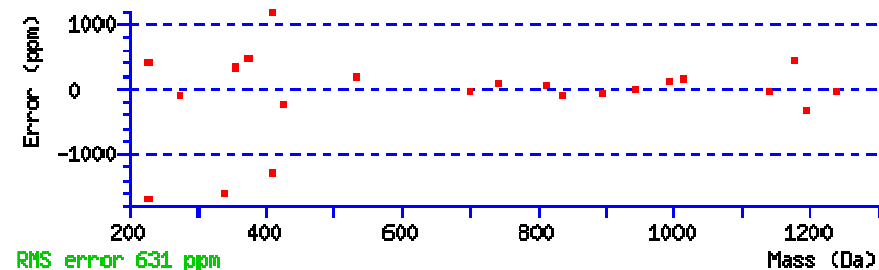

All matches to this query

| Score | Mr(calc):   | Delta    | Sequence                      |
|-------|-------------|----------|-------------------------------|
| 58.6  | 1368.699738 | 2.005710 | <a href="#">TVEAEAAHGTVTR</a> |
| 5.1   | 1369.702377 | 1.003071 | <a href="#">DLMANLTLPPGGR</a> |
| 4.8   | 1369.694992 | 1.010456 | <a href="#">SVGSVGDSPREPR</a> |
| 3.9   | 1368.707169 | 1.998279 | <a href="#">QTVMTVVYGVTR</a>  |
| 2.5   | 1368.693176 | 2.012272 | <a href="#">AEKCPHKSNR</a>    |
| 2.0   | 1370.697617 | 0.007831 | <a href="#">KSVAHNMTPNK</a>   |

|     |             |           |                                |
|-----|-------------|-----------|--------------------------------|
| 2.0 | 1370.697617 | 0.007831  | <a href="#">KSVAHNMTPNK</a>    |
| 1.5 | 1368.699753 | 2.005695  | <a href="#">QPGVGVGLADTEAR</a> |
| 1.3 | 1368.699707 | 2.005741  | <a href="#">EAEGAPQVEAGKR</a>  |
| 0.4 | 1370.712860 | -0.007412 | <a href="#">RSSWYRLMTK</a>     |

---

MS/MS Fragmentation of **TVESITDIR**

Found in **IPI00556655.1**, Tax\_Id=9606 Gene\_Symbol=LAMP1 LAMP1 protein variant (Fragment)

Match to Query 4343: 1060.578416 from(531.296484,2+)

Title: Elution from: 28.97 to 32.90 period: FD070412dMavril02.raw experiment: 1 cycles: 1 precIntensity: 2102721.4 FinneganScanNumber: 1937

Data file D:\projecttemp\FD080412dM\FD070412dMavril02.msm

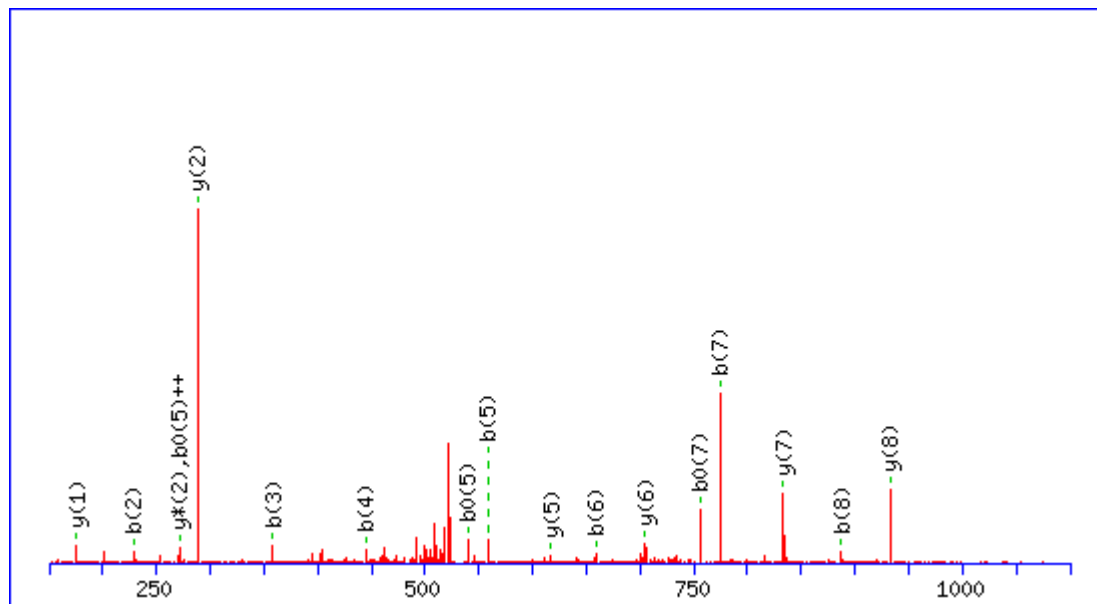

**Monoisotopic mass of neutral peptide Mr(calc):** 1060.576431

**Fixed modifications:** Carbamidomethyl (C)

**Variable modifications:**

**N-term :** Dimethyl (N-term)

**Ions Score:** 48 **Expect:** 0.0062

**Matches (Bold Red):** 17/76 fragment ions using 34 most intense peaks

| # | b                 | b <sup>++</sup> | b <sup>0</sup>    | b <sup>0++</sup>  | Seq. | y                 | y <sup>++</sup> | y <sup>*</sup>    | y <sup>*++</sup> | y <sup>0</sup> | y <sup>0++</sup> | # |
|---|-------------------|-----------------|-------------------|-------------------|------|-------------------|-----------------|-------------------|------------------|----------------|------------------|---|
| 1 | 130.086251        | 65.546763       | 112.075686        | 56.541481         | T    |                   |                 |                   |                  |                |                  | 9 |
| 2 | <b>229.154665</b> | 115.080970      | 211.144100        | 106.075688        | V    | <b>932.504737</b> | 466.756007      | 915.478188        | 458.242732       | 914.494172     | 457.750724       | 8 |
| 3 | <b>358.197258</b> | 179.602267      | 340.186693        | 170.596984        | E    | <b>833.436323</b> | 417.221800      | 816.409774        | 408.708525       | 815.425758     | 408.216517       | 7 |
| 4 | <b>445.229286</b> | 223.118281      | 427.218721        | 214.112998        | S    | <b>704.393730</b> | 352.700503      | 687.367181        | 344.187229       | 686.383165     | 343.695221       | 6 |
| 5 | <b>558.313350</b> | 279.660313      | <b>540.302785</b> | <b>270.655031</b> | I    | <b>617.361702</b> | 309.184489      | 600.335153        | 300.671215       | 599.351137     | 300.179207       | 5 |
| 6 | <b>659.361029</b> | 330.184153      | 641.350464        | 321.178870        | T    | 504.277638        | 252.642457      | 487.251089        | 244.129182       | 486.267073     | 243.637174       | 4 |
| 7 | <b>774.387972</b> | 387.697624      | <b>756.377407</b> | 378.692341        | D    | 403.229959        | 202.118617      | 386.203410        | 193.605343       | 385.219394     | 193.113335       | 3 |
| 8 | <b>887.472036</b> | 444.239656      | 869.461471        | 435.234374        | I    | <b>288.203016</b> | 144.605146      | <b>271.176467</b> | 136.091871       |                |                  | 2 |
| 9 |                   |                 |                   |                   | R    | <b>175.118952</b> | 88.063114       | 158.092403        | 79.549839        |                |                  | 1 |

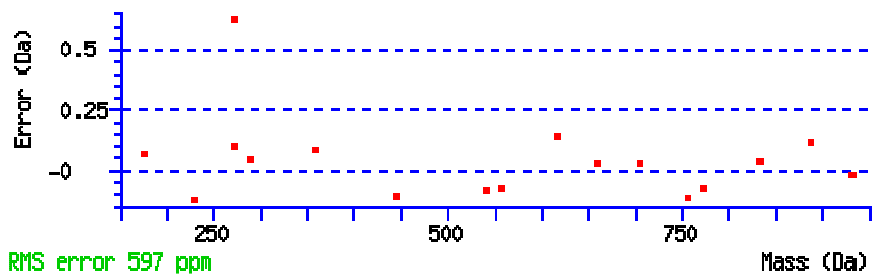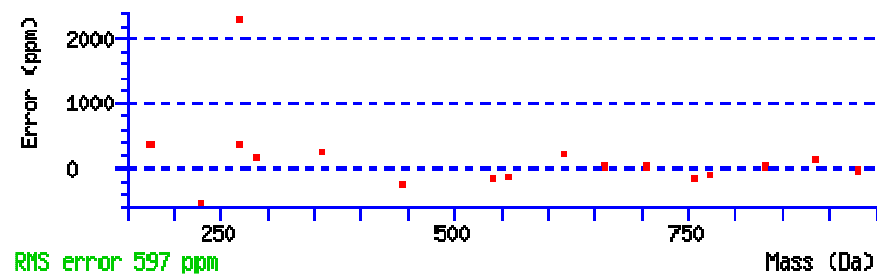

All matches to this query

| Score | Mr(calc):   | Delta     | Sequence                  |
|-------|-------------|-----------|---------------------------|
| 48.4  | 1060.576431 | 0.001985  | <a href="#">TVESITDIR</a> |
| 22.7  | 1060.569870 | 0.008546  | <a href="#">EMKNDRIK</a>  |
| 22.3  | 1060.576385 | 0.002031  | <a href="#">EASDKEKAK</a> |
| 18.6  | 1060.583771 | -0.005355 | <a href="#">EAEEKMLK</a>  |
| 16.7  | 1060.577744 | 0.000672  | <a href="#">QAEFNRLR</a>  |
| 15.9  | 1060.576385 | 0.002031  | <a href="#">EASDKEKAK</a> |
| 15.5  | 1060.569885 | 0.008531  | <a href="#">LEDMRILR</a>  |
| 15.5  | 1060.576416 | 0.002000  | <a href="#">NKDTDISIK</a> |
| 15.1  | 1060.576401 | 0.002015  | <a href="#">EASDKEKVK</a> |
| 15.0  | 1058.571991 | 2.006425  | <a href="#">XDEAVNKIR</a> |

MS/MS Fragmentation of **VAIDVGYR**

Found in **IPI00413641.7**, Tax\_Id=9606 Gene\_Symbol=AKR1B1 Aldose reductase

Match to Query 2939: 919.510624 from(460.762588,2+)

Title: Elution from: 29.10 to 33.04 period: FD070412dMavril07.raw experiment: 1 cycles: 1 precIntensity: 6231069.7 FinneganScanNumber: 2055

Data file D:\projecttemp\FD080412dM\FD070412dMavril07.msm

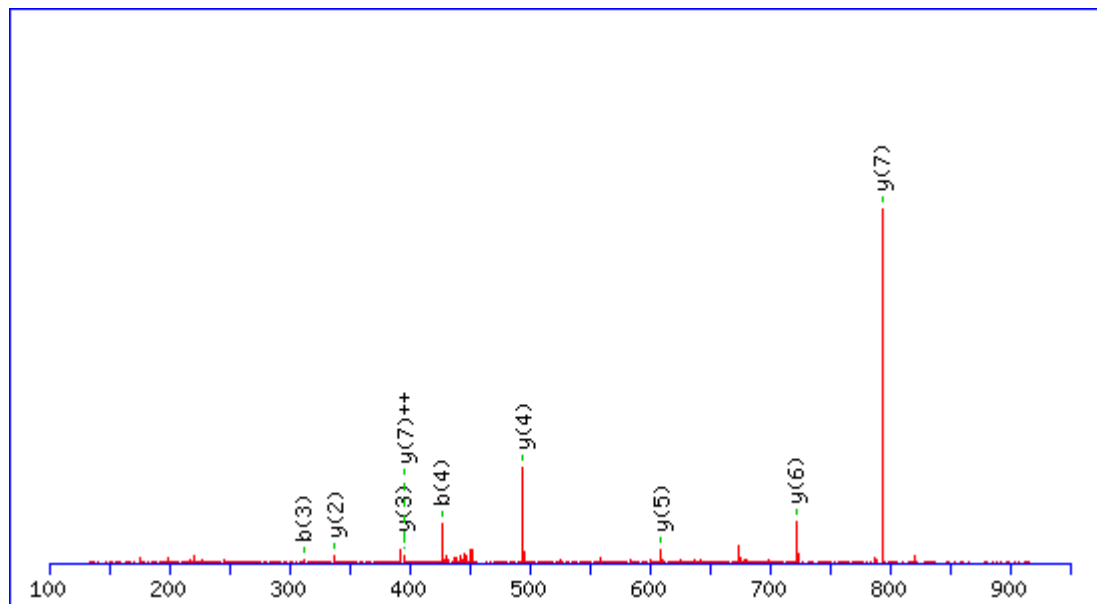

**Monoisotopic mass of neutral peptide Mr(calc):** 919.512711

**Fixed modifications:** Carbamidomethyl (C)

**Variable modifications:**

**N-term :** Dimethyl (N-term)

**Ions Score:** 31 **Expect:** 0.29

**Matches (Bold Red):** 9/56 fragment ions using 17 most intense peaks

| # | b          | b <sup>++</sup> | b <sup>0</sup> | b <sup>0++</sup> | Seq. | y          | y <sup>++</sup> | y*         | y <sup>+++</sup> | y <sup>0</sup> | y <sup>0++</sup> | # |
|---|------------|-----------------|----------------|------------------|------|------------|-----------------|------------|------------------|----------------|------------------|---|
| 1 | 128.106986 | 64.557131       |                |                  | V    |            |                 |            |                  |                |                  | 8 |
| 2 | 199.144100 | 100.075688      |                |                  | A    | 793.420280 | 397.213778      | 776.393731 | 388.700504       | 775.409715     | 388.208496       | 7 |
| 3 | 312.228164 | 156.617720      |                |                  | I    | 722.383166 | 361.695221      | 705.356617 | 353.181947       | 704.372601     | 352.689939       | 6 |
| 4 | 427.255107 | 214.131191      | 409.244542     | 205.125909       | D    | 609.299102 | 305.153189      | 592.272553 | 296.639915       | 591.288537     | 296.147907       | 5 |
| 5 | 526.323521 | 263.665399      | 508.312956     | 254.660116       | V    | 494.272159 | 247.639717      | 477.245610 | 239.126443       |                |                  | 4 |
| 6 | 583.344985 | 292.176131      | 565.334420     | 283.170848       | G    | 395.203745 | 198.105510      | 378.177196 | 189.592236       |                |                  | 3 |
| 7 | 746.408314 | 373.707795      | 728.397749     | 364.702513       | Y    | 338.182281 | 169.594778      | 321.155732 | 161.081504       |                |                  | 2 |
| 8 |            |                 |                |                  | R    | 175.118952 | 88.063114       | 158.092403 | 79.549839        |                |                  | 1 |

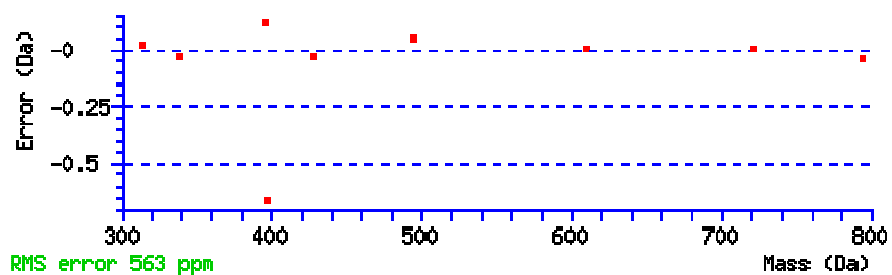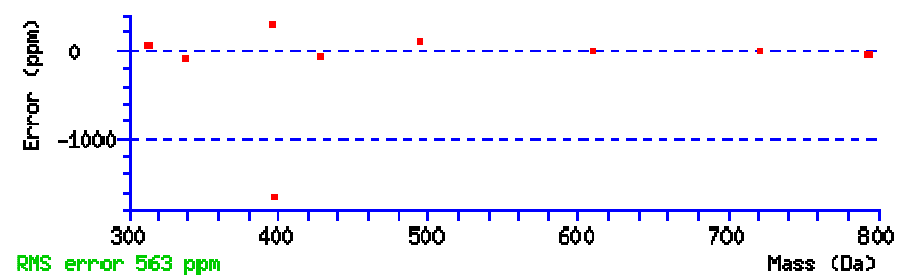

#### All matches to this query

| Score | Mr(calc):  | Delta     | Sequence                 |
|-------|------------|-----------|--------------------------|
| 31.3  | 919.512711 | -0.002087 | <a href="#">VAIDVGYR</a> |
| 16.9  | 919.512726 | -0.002102 | <a href="#">VVDLVGYR</a> |
| 8.8   | 917.497055 | 2.013569  | <a href="#">APEVTFAR</a> |
| 7.7   | 919.504822 | 0.005802  | <a href="#">VASEALMK</a> |
| 7.2   | 917.508286 | 2.002338  | <a href="#">PSLPSPHR</a> |
| 5.9   | 919.516083 | -0.005459 | <a href="#">VTVMASLR</a> |
| 5.5   | 919.516068 | -0.005444 | <a href="#">VSEMKVR</a>  |
| 5.3   | 919.504822 | 0.005802  | <a href="#">AVIEMSSK</a> |
| 5.1   | 918.499680 | 1.010944  | <a href="#">MIHSYIK</a>  |
| 4.1   | 917.512314 | 1.998310  | <a href="#">PIWYVGR</a>  |



MS/MS Fragmentation of **VALLPAGGALQHSR**

Found in **IPI00464978.1**, Tax\_Id=9606 Gene\_Symbol=IRS2 Insulin receptor substrate 2 insertion mutant (Fragment)

Match to Query 5531: 1416.821163 from(473.280997,3+)

Title: Elution from: 31.10 to 35.04 period: FD070412dMavril02.raw experiment: 1 cycles: 1 precIntensity: 964637.8 FinneganScanNumber: 2108

Data file D:\projecttemp\FD080412dM\FD070412dMavril02.msm

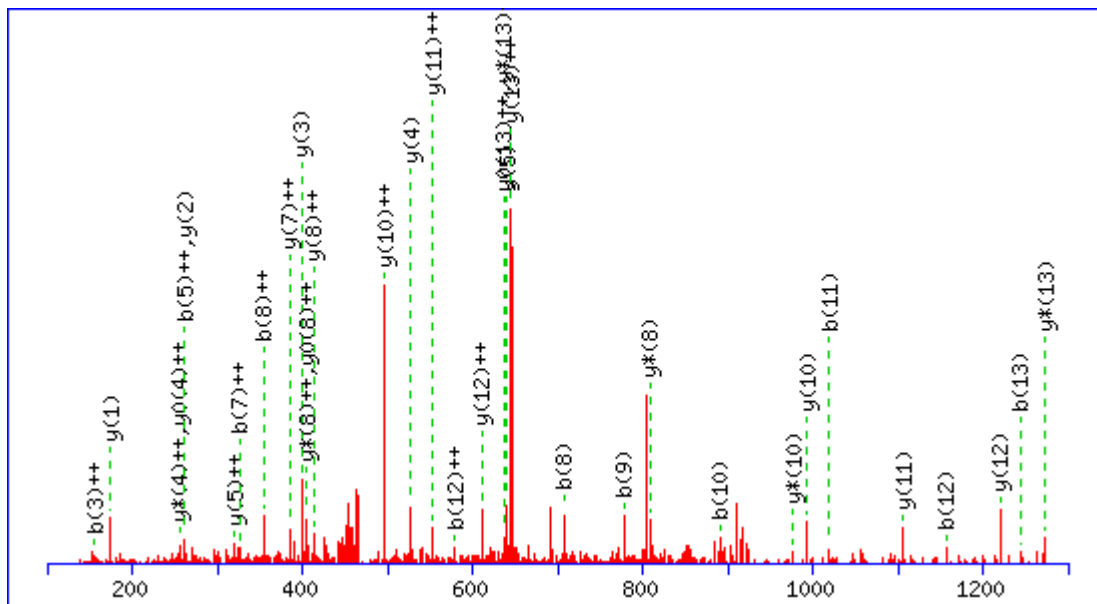

**Monoisotopic mass of neutral peptide Mr(calc):** 1416.820114

**Fixed modifications:** Carbamidomethyl (C)

**Variable modifications:**

**N-term :** Dimethyl (N-term)

**Ions Score:** 50 **Expect:** 0.0033

**Matches (Bold Red):** 35/110 fragment ions using 66 most intense peaks

| #  | b           | b <sup>++</sup> | b*          | b <sup>*++</sup> | b <sup>0</sup> | b <sup>0++</sup> | Seq. | y           | y <sup>++</sup> | y*          | y <sup>*++</sup> | y <sup>0</sup> | y <sup>0++</sup> | #  |
|----|-------------|-----------------|-------------|------------------|----------------|------------------|------|-------------|-----------------|-------------|------------------|----------------|------------------|----|
| 1  | 128.106986  | 64.557131       |             |                  |                |                  | V    |             |                 |             |                  |                |                  | 14 |
| 2  | 199.144100  | 100.075688      |             |                  |                |                  | A    | 1290.727696 | 645.867486      | 1273.701147 | 637.354212       | 1272.717131    | 636.862204       | 13 |
| 3  | 312.228164  | 156.617720      |             |                  |                |                  | L    | 1219.690582 | 610.348929      | 1202.664033 | 601.835655       | 1201.680017    | 601.343647       | 12 |
| 4  | 425.312228  | 213.159752      |             |                  |                |                  | L    | 1106.606518 | 553.806897      | 1089.579969 | 545.293623       | 1088.595953    | 544.801615       | 11 |
| 5  | 522.364992  | 261.686134      |             |                  |                |                  | P    | 993.522454  | 497.264865      | 976.495905  | 488.751591       | 975.511889     | 488.259583       | 10 |
| 6  | 593.402106  | 297.204691      |             |                  |                |                  | A    | 896.469690  | 448.738483      | 879.443141  | 440.225209       | 878.459125     | 439.733201       | 9  |
| 7  | 650.423570  | 325.715423      |             |                  |                |                  | G    | 825.432576  | 413.219926      | 808.406027  | 404.706652       | 807.422011     | 404.214644       | 8  |
| 8  | 707.445034  | 354.226155      |             |                  |                |                  | G    | 768.411112  | 384.709194      | 751.384563  | 376.195920       | 750.400547     | 375.703912       | 7  |
| 9  | 778.482148  | 389.744712      |             |                  |                |                  | A    | 711.389648  | 356.198462      | 694.363099  | 347.685188       | 693.379083     | 347.193180       | 6  |
| 10 | 891.566212  | 446.286744      |             |                  |                |                  | L    | 640.352534  | 320.679905      | 623.325985  | 312.166631       | 622.341969     | 311.674623       | 5  |
| 11 | 1019.624790 | 510.316033      | 1002.598241 | 501.802759       |                |                  | Q    | 527.268470  | 264.137873      | 510.241921  | 255.624599       | 509.257905     | 255.132591       | 4  |
| 12 | 1156.683702 | 578.845489      | 1139.657153 | 570.332215       |                |                  | H    | 399.209892  | 200.108584      | 382.183343  | 191.595310       | 381.199327     | 191.103302       | 3  |
| 13 | 1243.715730 | 622.361503      | 1226.689181 | 613.848229       | 1225.705165    | 613.356221       | S    | 262.150980  | 131.579128      | 245.124431  | 123.065854       | 244.140415     | 122.573846       | 2  |
| 14 |             |                 |             |                  |                |                  | R    | 175.118952  | 88.063114       | 158.092403  | 79.549839        |                |                  | 1  |

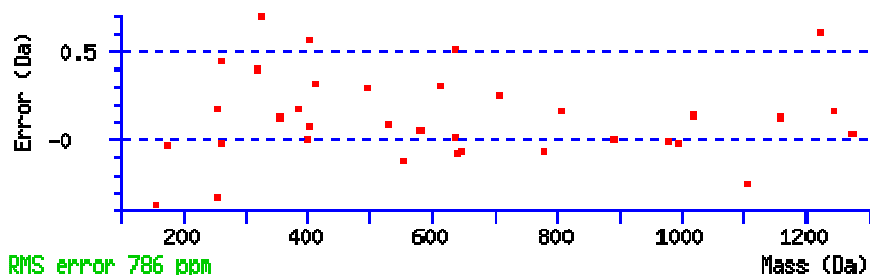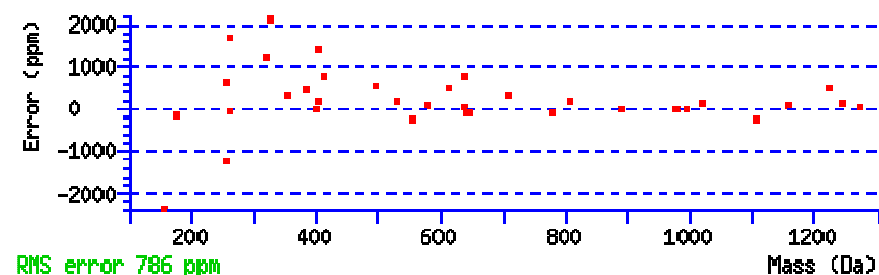

All matches to this query

| Score | Mr(calc):   | Delta    | Sequence                       |
|-------|-------------|----------|--------------------------------|
| 49.6  | 1416.820114 | 0.001049 | <a href="#">VALLPAGGALQHSR</a> |
| 21.9  | 1414.814346 | 2.006817 | <a href="#">PALLSSTLSSGKAR</a> |
| 21.4  | 1416.808868 | 0.012295 | <a href="#">GILISQGKEAAFR</a>  |
| 13.3  | 1415.813614 | 1.007549 | <a href="#">PDALGLNTRLKY</a>   |
| 9.6   | 1415.813599 | 1.007564 | <a href="#">PEGIELQYRKK</a>    |

|     |             |           |                                |
|-----|-------------|-----------|--------------------------------|
| 9.3 | 1415.810944 | 1.010219  | <a href="#">KD VIRHAAVHSR</a>  |
| 9.3 | 1415.810944 | 1.010219  | <a href="#">KD VIRHAAVHSR</a>  |
| 7.7 | 1416.808884 | 0.012279  | <a href="#">LGPTTFRLSIER</a>   |
| 7.3 | 1416.820129 | 0.001034  | <a href="#">RSGLLLHGPPGTGK</a> |
| 7.1 | 1416.834015 | -0.012852 | <a href="#">QKIVOLEGYQK</a>    |

---

MS/MS Fragmentation of **VAPAQPSEEGPGR**

Found in **IPI00012079.3**, Tax\_Id=9606 Gene\_Symbol=EIF4B cDNA FLJ54492, highly similar to Eukaryotic translation initiation factor 4B

Match to Query 4984: 1321.662432 from(661.838492,2+)

Title: Elution from: 16.55 to 20.49 period: FD070412dMavril03.raw experiment: 1 cycles: 1 precIntensity: 329981.0 FinneganScanNumber: 994

Data file D:\projecttemp\FD080412dM\FD070412dMavril03.msm

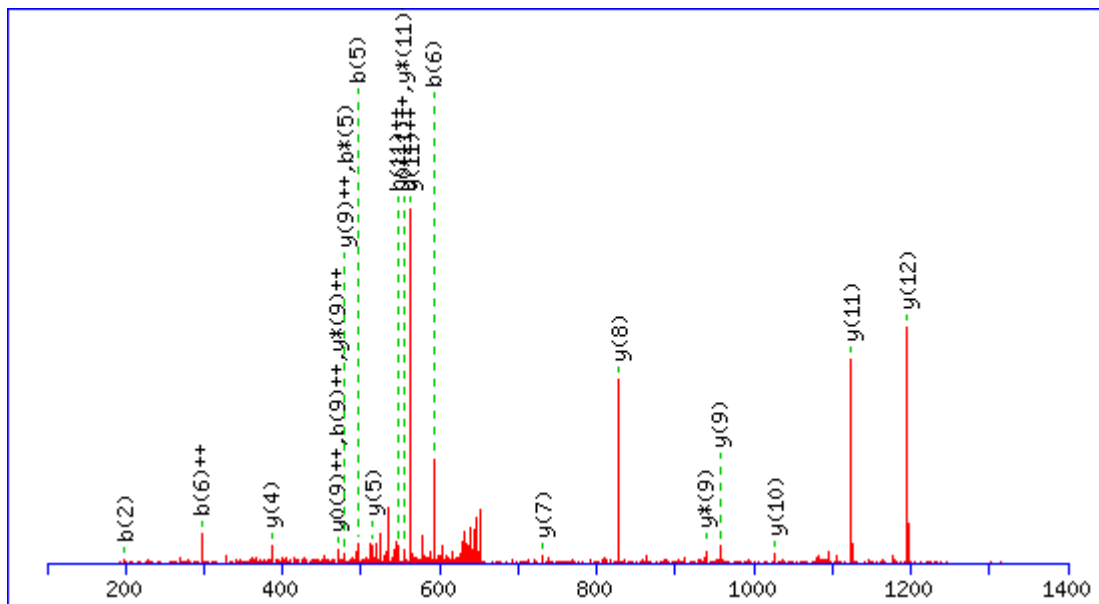

**Monoisotopic mass of neutral peptide Mr(calc):** 1321.662613

**Fixed modifications:** Carbamidomethyl (C)

**Variable modifications:**

**N-term :** Dimethyl (N-term)

**Ions Score:** 49 **Expect:** 0.0048

**Matches (Bold Red):** 22/116 fragment ions using 40 most intense peaks

| #  | b                 | b <sup>++</sup>   | b*                | b <sup>+++</sup> | b <sup>0</sup> | b <sup>0++</sup> | Seq. | y                  | y <sup>++</sup>   | y*                | y <sup>+++</sup>  | y <sup>0</sup> | y <sup>0++</sup>  | #  |
|----|-------------------|-------------------|-------------------|------------------|----------------|------------------|------|--------------------|-------------------|-------------------|-------------------|----------------|-------------------|----|
| 1  | 128.106986        | 64.557131         |                   |                  |                |                  | V    |                    |                   |                   |                   |                |                   | 13 |
| 2  | <b>199.144100</b> | 100.075688        |                   |                  |                |                  | A    | <b>1195.570192</b> | 598.288734        | 1178.543643       | 589.775460        | 1177.559627    | 589.283451        | 12 |
| 3  | 296.196864        | 148.602070        |                   |                  |                |                  | P    | <b>1124.533078</b> | <b>562.770177</b> | 1107.506529       | <b>554.256903</b> | 1106.522513    | <b>553.764894</b> | 11 |
| 4  | 367.233978        | 184.120627        |                   |                  |                |                  | A    | <b>1027.480314</b> | 514.243795        | 1010.453765       | 505.730521        | 1009.469749    | 505.238513        | 10 |
| 5  | <b>495.292556</b> | 248.149916        | <b>478.266007</b> | 239.636641       |                |                  | Q    | <b>956.443200</b>  | <b>478.725238</b> | <b>939.416651</b> | <b>470.211964</b> | 938.432635     | <b>469.719956</b> | 9  |
| 6  | <b>592.345320</b> | <b>296.676298</b> | 575.318771        | 288.163024       |                |                  | P    | <b>828.384622</b>  | 414.695949        | 811.358073        | 406.182675        | 810.374057     | 405.690667        | 8  |
| 7  | 679.377348        | 340.192312        | 662.350799        | 331.679037       | 661.366783     | 331.187029       | S    | <b>731.331858</b>  | 366.169567        | 714.305309        | 357.656293        | 713.321293     | 357.164285        | 7  |
| 8  | 808.419941        | 404.713609        | 791.393392        | 396.200334       | 790.409376     | 395.708326       | E    | 644.299830         | 322.653553        | 627.273281        | 314.140279        | 626.289265     | 313.648271        | 6  |
| 9  | 937.462534        | <b>469.234905</b> | 920.435985        | 460.721631       | 919.451969     | 460.229623       | E    | <b>515.257237</b>  | 258.132257        | 498.230688        | 249.618982        | 497.246672     | 249.126974        | 5  |
| 10 | 994.483998        | 497.745637        | 977.457449        | 489.232363       | 976.473433     | 488.740355       | G    | <b>386.214644</b>  | 193.610960        | 369.188095        | 185.097685        |                |                   | 4  |
| 11 | 1091.536762       | <b>546.272019</b> | 1074.510213       | 537.758745       | 1073.526197    | 537.266737       | P    | 329.193180         | 165.100228        | 312.166631        | 156.586953        |                |                   | 3  |
| 12 | 1148.558226       | 574.782751        | 1131.531677       | 566.269477       | 1130.547661    | 565.777469       | G    | 232.140416         | 116.573846        | 215.113867        | 108.060571        |                |                   | 2  |
| 13 |                   |                   |                   |                  |                |                  | R    | 175.118952         | 88.063114         | 158.092403        | 79.549839         |                |                   | 1  |

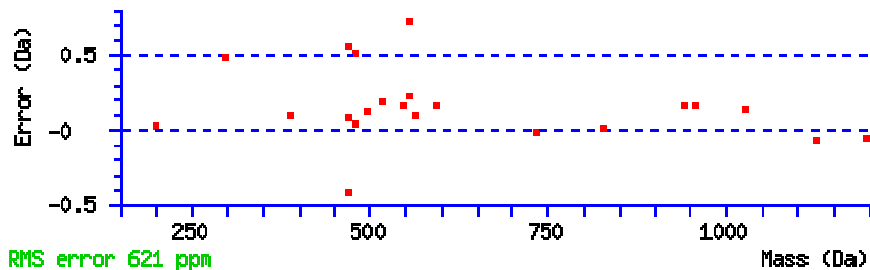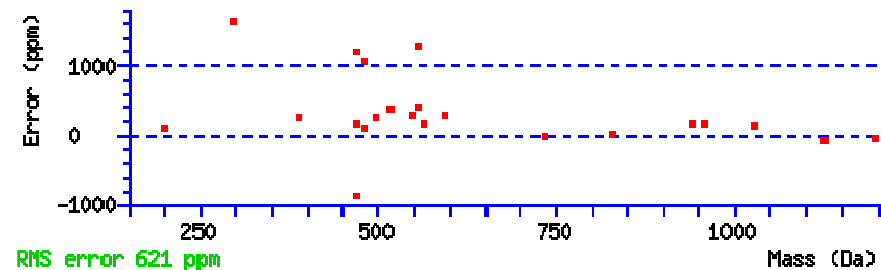

All matches to this query

| Score | Mr(cal):    | Delta     | Sequence                      |
|-------|-------------|-----------|-------------------------------|
| 48.5  | 1321.662613 | -0.000181 | <a href="#">VAPAQPSEEGPGR</a> |
| 14.7  | 1319.647827 | 2.014605  | <a href="#">MHKGECGKAFK</a>   |
| 12.6  | 1319.647827 | 2.014605  | <a href="#">MHKGECGKAFK</a>   |
| 2.4   | 1319.654358 | 2.008074  | <a href="#">PDATCASPAKFK</a>  |
| 2.3   | 1319.666260 | 1.996172  | <a href="#">PGFYNPFTFXR</a>   |
| 2.2   | 1321.669998 | -0.007566 | <a href="#">TPEGNIKLYCK</a>   |

|     |             |           |                             |
|-----|-------------|-----------|-----------------------------|
| 1.4 | 1321.654724 | 0.007708  | <a href="#">VAEEIEKMSSR</a> |
| 1.4 | 1321.669983 | -0.007551 | <a href="#">MWNDLSEKKK</a>  |
| 1.4 | 1321.669983 | -0.007551 | <a href="#">MWNDLSEKKK</a>  |
| 1.2 | 1319.647827 | 2.014605  | <a href="#">MHKGECGKAFK</a> |

---

MS/MS Fragmentation of **VCTLAIDPGDSDIIR**

Found in **IPI00219156.7**, Tax\_Id=9606 Gene\_Symbol=RPL30 60S ribosomal protein L30

Match to Query 6199: 1784.917872 from(893.466212,2+)

Title: Elution from: 45.69 to 49.55 period: FD070412dMavril06.raw experiment: 1 cycles: 1 precIntensity: 498767.5 FinneganScanNumber: 3158

Data file D:\projecttemp\FD080412dM\FD070412dMavril06.msm

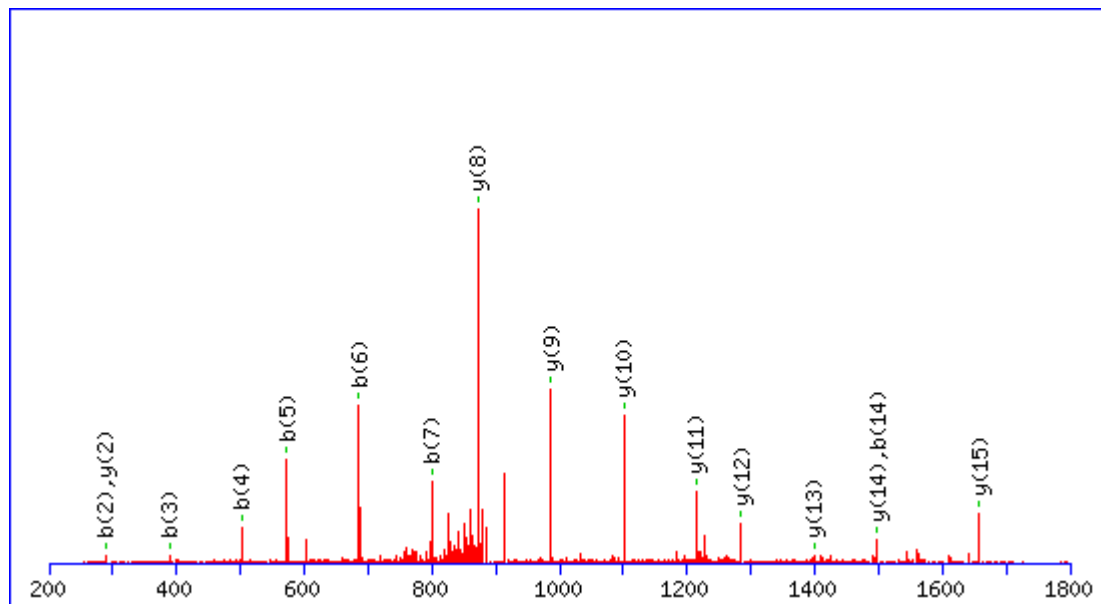

**Monoisotopic mass of neutral peptide Mr(calc):** 1784.934235

**Fixed modifications:** Carbamidomethyl (C)

**Variable modifications:**

**N-term :** Dimethyl (N-term)

**Ions Score:** 85 **Expect:** 1.1e-06

**Matches (Bold Red):** 16/140 fragment ions using 15 most intense peaks

| #  | b                  | b <sup>++</sup> | b <sup>0</sup> | b <sup>0++</sup> | Seq. | y                  | y <sup>++</sup> | y <sup>*</sup> | y <sup>*++</sup> | y <sup>0</sup> | y <sup>0++</sup> | #  |
|----|--------------------|-----------------|----------------|------------------|------|--------------------|-----------------|----------------|------------------|----------------|------------------|----|
| 1  | 128.106986         | 64.557131       |                |                  | V    |                    |                 |                |                  |                |                  | 16 |
| 2  | <b>288.137635</b>  | 144.572455      |                |                  | C    | <b>1658.841799</b> | 829.924538      | 1641.815250    | 821.411263       | 1640.831234    | 820.919255       | 15 |
| 3  | <b>389.185314</b>  | 195.096295      | 371.174749     | 186.091013       | T    | <b>1498.811150</b> | 749.909213      | 1481.784601    | 741.395939       | 1480.800585    | 740.903931       | 14 |
| 4  | <b>502.269378</b>  | 251.638327      | 484.258813     | 242.633045       | L    | <b>1397.763471</b> | 699.385374      | 1380.736922    | 690.872099       | 1379.752906    | 690.380091       | 13 |
| 5  | <b>573.306492</b>  | 287.156884      | 555.295927     | 278.151602       | A    | <b>1284.679407</b> | 642.843342      | 1267.652858    | 634.330067       | 1266.668842    | 633.838059       | 12 |
| 6  | <b>686.390556</b>  | 343.698916      | 668.379991     | 334.693634       | I    | <b>1213.642293</b> | 607.324785      | 1196.615744    | 598.811510       | 1195.631728    | 598.319502       | 11 |
| 7  | <b>799.474620</b>  | 400.240948      | 781.464055     | 391.235666       | I    | <b>1100.558229</b> | 550.782753      | 1083.531680    | 542.269478       | 1082.547664    | 541.777470       | 10 |
| 8  | 914.501563         | 457.754420      | 896.490998     | 448.749137       | D    | <b>987.474165</b>  | 494.240721      | 970.447616     | 485.727446       | 969.463600     | 485.235438       | 9  |
| 9  | 1011.554327        | 506.280802      | 993.543762     | 497.275519       | P    | <b>872.447222</b>  | 436.727249      | 855.420673     | 428.213975       | 854.436657     | 427.721967       | 8  |
| 10 | 1068.575791        | 534.791534      | 1050.565226    | 525.786251       | G    | 775.394458         | 388.200867      | 758.367909     | 379.687593       | 757.383893     | 379.195585       | 7  |
| 11 | 1183.602734        | 592.305005      | 1165.592169    | 583.299723       | D    | 718.372994         | 359.690135      | 701.346445     | 351.176861       | 700.362429     | 350.684853       | 6  |
| 12 | 1270.634762        | 635.821019      | 1252.624197    | 626.815737       | S    | 603.346051         | 302.176664      | 586.319502     | 293.663389       | 585.335486     | 293.171381       | 5  |
| 13 | 1385.661705        | 693.334491      | 1367.651140    | 684.329208       | D    | 516.314023         | 258.660649      | 499.287474     | 250.147375       | 498.303458     | 249.655367       | 4  |
| 14 | <b>1498.745769</b> | 749.876523      | 1480.735204    | 740.871240       | I    | 401.287080         | 201.147178      | 384.260531     | 192.633903       |                |                  | 3  |
| 15 | 1611.829833        | 806.418555      | 1593.819268    | 797.413272       | I    | <b>288.203016</b>  | 144.605146      | 271.176467     | 136.091871       |                |                  | 2  |
| 16 |                    |                 |                |                  | R    | 175.118952         | 88.063114       | 158.092403     | 79.549839        |                |                  | 1  |

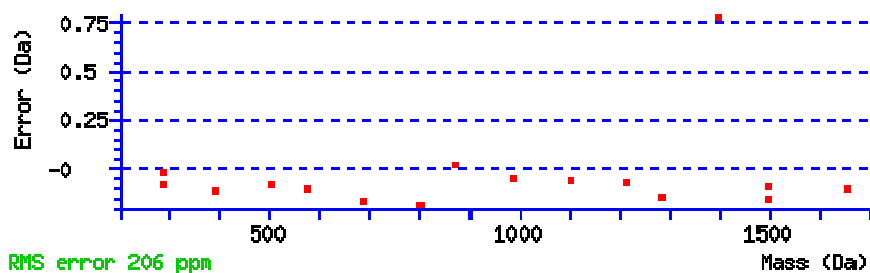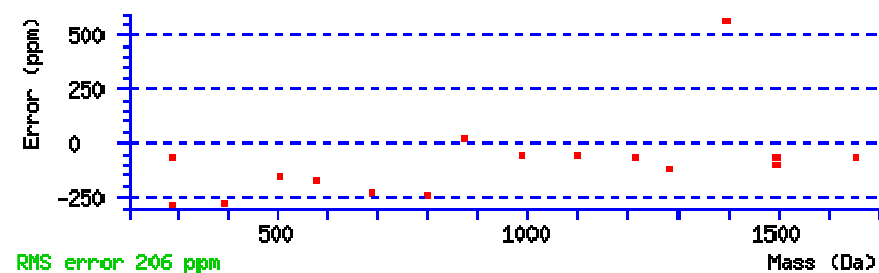

All matches to this query

| Score | Mr(calc):   | Delta     | Sequence                         |
|-------|-------------|-----------|----------------------------------|
| 85.3  | 1784.934235 | -0.016363 | <a href="#">VCTLAIDPGDSDIIR</a>  |
| 6.0   | 1784.928345 | -0.010473 | <a href="#">LGFKVNYHYMSQVK</a>   |
| 4.7   | 1783.921661 | 0.996211  | <a href="#">SAPAASERPLWDTSLR</a> |



|     |             |           |                                  |
|-----|-------------|-----------|----------------------------------|
| 3.9 | 1783.911133 | 1.006739  | <a href="#">NTCPGDRSALRPSGLR</a> |
| 3.6 | 1784.920929 | -0.003057 | <a href="#">WWEQEIKINGNIQK</a>   |
| 2.6 | 1784.913071 | 0.004801  | <a href="#">FKLEDYMDGLAIRSK</a>  |
| 2.5 | 1784.926819 | -0.008947 | <a href="#">DGSPLDDKDERITIR</a>  |
| 2.1 | 1783.902603 | 1.015269  | <a href="#">VEGDMQVPDLDIKGPK</a> |
| 2.1 | 1783.902603 | 1.015269  | <a href="#">VEGDMQVPDLDIKGPK</a> |
| 1.9 | 1783.929047 | 0.988825  | <a href="#">EEIRYYGCIQGGKK</a>   |

MS/MS Fragmentation of **VDCTAHSDVCSAQGVR**

Found in **IPI00171438.2**, Tax\_Id=9606 Gene\_Symbol=TXNDC5 Thioredoxin domain-containing protein 5

Match to Query 5945: 1788.791913 from(597.271247,3+)

Title: Elution from: 17.44 to 21.32 period: FD070412dMavril05.raw experiment: 1 cycles: 1 precIntensity: 427919.8 FinneganScanNumber: 1009

Data file D:\projecttemp\FD080412dM\FD070412dMavril05.msm

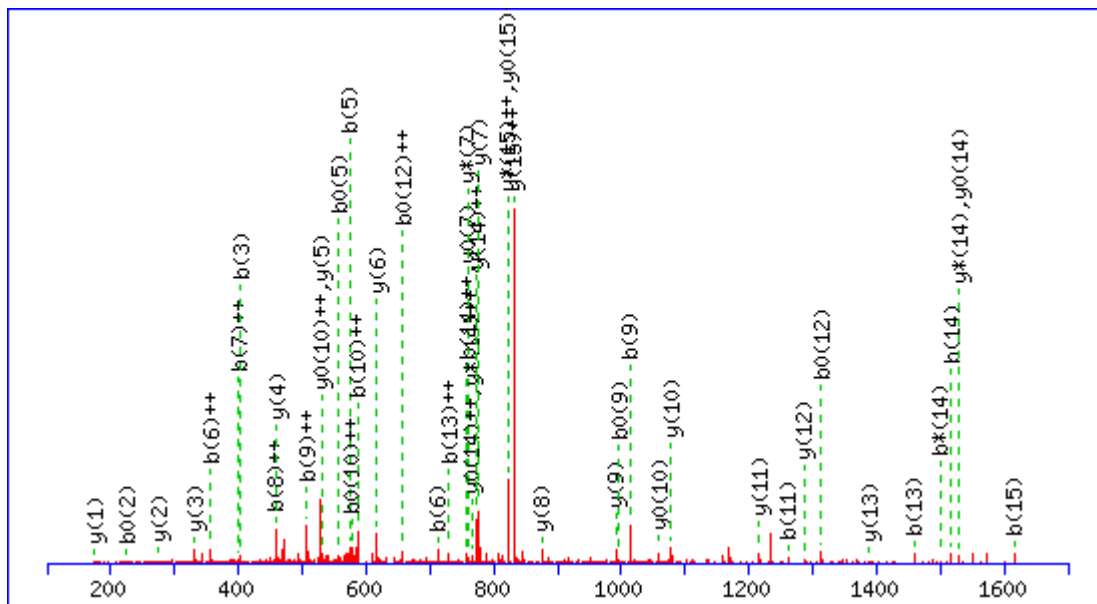

**Monoisotopic mass of neutral peptide Mr(calc):** 1788.788345

**Fixed modifications:** Carbamidomethyl (C)

**Variable modifications:**

**N-term :** Dimethyl (N-term)

**Ions Score:** 59 **Expect:** 9.3e-05

**Matches (Bold Red):** 47/144 fragment ions using 117 most intense peaks

| #  | b           | b <sup>++</sup> | b*          | b <sup>*++</sup> | b <sup>0</sup> | b <sup>0++</sup> | Seq. | y           | y <sup>++</sup> | y*          | y <sup>*++</sup> | y <sup>0</sup> | y <sup>0++</sup> | #  |
|----|-------------|-----------------|-------------|------------------|----------------|------------------|------|-------------|-----------------|-------------|------------------|----------------|------------------|----|
| 1  | 128.106986  | 64.557131       |             |                  |                |                  | V    |             |                 |             |                  |                |                  | 16 |
| 2  | 243.133929  | 122.070602      |             |                  | 225.123364     | 113.065320       | D    | 1662.695881 | 831.851578      | 1645.669332 | 823.338304       | 1644.685316    | 822.846296       | 15 |
| 3  | 403.164578  | 202.085927      |             |                  | 385.154013     | 193.080645       | C    | 1547.668938 | 774.338107      | 1530.642389 | 765.824833       | 1529.658373    | 765.332825       | 14 |
| 4  | 504.212257  | 252.609767      |             |                  | 486.201692     | 243.604484       | T    | 1387.638289 | 694.322783      | 1370.611740 | 685.809508       | 1369.627724    | 685.317500       | 13 |
| 5  | 575.249371  | 288.128324      |             |                  | 557.238806     | 279.123041       | A    | 1286.590610 | 643.798943      | 1269.564061 | 635.285669       | 1268.580045    | 634.793660       | 12 |
| 6  | 712.308283  | 356.657780      |             |                  | 694.297718     | 347.652497       | H    | 1215.553496 | 608.280386      | 1198.526947 | 599.767111       | 1197.542931    | 599.275103       | 11 |
| 7  | 799.340311  | 400.173794      |             |                  | 781.329746     | 391.168511       | S    | 1078.494584 | 539.750930      | 1061.468035 | 531.237655       | 1060.484019    | 530.745647       | 10 |
| 8  | 914.367254  | 457.687265      |             |                  | 896.356689     | 448.681983       | D    | 991.462556  | 496.234916      | 974.436007  | 487.721641       | 973.451991     | 487.229633       | 9  |
| 9  | 1013.435668 | 507.221472      |             |                  | 995.425103     | 498.216189       | V    | 876.435613  | 438.721445      | 859.409064  | 430.208170       | 858.425048     | 429.716162       | 8  |
| 10 | 1173.466317 | 587.236797      |             |                  | 1155.455752    | 578.231514       | C    | 777.367199  | 389.187238      | 760.340650  | 380.673963       | 759.356634     | 380.181955       | 7  |
| 11 | 1260.498345 | 630.752811      |             |                  | 1242.487780    | 621.747528       | S    | 617.336550  | 309.171913      | 600.310001  | 300.658638       | 599.325985     | 300.166630       | 6  |
| 12 | 1331.535459 | 666.271368      |             |                  | 1313.524894    | 657.266085       | A    | 530.304522  | 265.655899      | 513.277973  | 257.142624       |                |                  | 5  |
| 13 | 1459.594037 | 730.300657      | 1442.567488 | 721.787382       | 1441.583472    | 721.295374       | Q    | 459.267408  | 230.137342      | 442.240859  | 221.624067       |                |                  | 4  |
| 14 | 1516.615501 | 758.811389      | 1499.588952 | 750.298114       | 1498.604936    | 749.806106       | G    | 331.208830  | 166.108053      | 314.182281  | 157.594778       |                |                  | 3  |
| 15 | 1615.683915 | 808.345596      | 1598.657366 | 799.832321       | 1597.673350    | 799.340313       | V    | 274.187366  | 137.597321      | 257.160817  | 129.084046       |                |                  | 2  |
| 16 |             |                 |             |                  |                |                  | R    | 175.118952  | 88.063114       | 158.092403  | 79.549839        |                |                  | 1  |

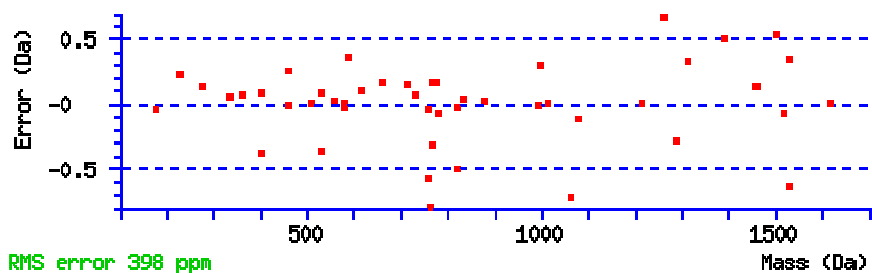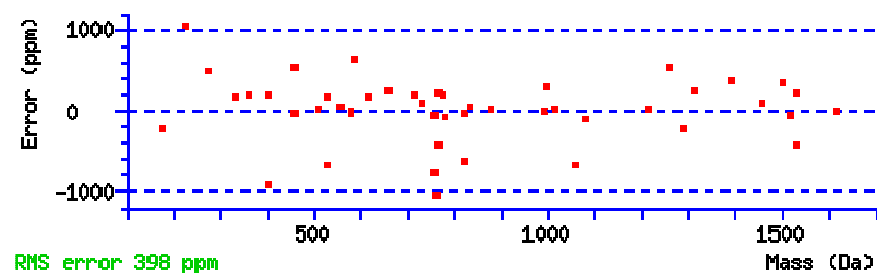

All matches to this query

| Score | Mr(calc):   | Delta     | Sequence                          |
|-------|-------------|-----------|-----------------------------------|
| 59.1  | 1788.788345 | 0.003568  | <a href="#">VDCTAHSQVCSAQGVR</a>  |
| 9.9   | 1788.803070 | -0.011157 | <a href="#">KSQLMCQOMYMGEK</a>    |
| 3.0   | 1788.791473 | 0.000440  | <a href="#">VNDDVGVGIDWTNENDR</a> |

|     |             |           |                                   |
|-----|-------------|-----------|-----------------------------------|
| 2.4 | 1788.806076 | -0.014163 | <a href="#">CQAGSAHSSTEVTVEAR</a> |
| 2.2 | 1788.796387 | -0.004474 | <a href="#">FPGLISGCTMDWFSR</a>   |
| 2.1 | 1788.802231 | -0.010318 | <a href="#">SFLDTMLQEMAASGTR</a>  |
| 0.9 | 1788.803558 | -0.011645 | <a href="#">RETATCLAWCHDNK</a>    |
| 0.5 | 1786.790421 | 2.001492  | <a href="#">NITAEDCSHSQDAGVR</a>  |

---

MS/MS Fragmentation of **VEECALGQDLCR**

Found in **IPI00010676.1**, Tax\_Id=9606 Gene\_Symbol=PLAUR Isoform 1 of Urokinase plasminogen activator surface receptor

Match to Query 5107: 1476.678352 from(739.346452,2+)

Title: Elution from: 29.09 to 33.05 period: FD070412dMavril04.raw experiment: 1 cycles: 1 precIntensity: 287603.5 FinneganScanNumber: 1934

Data file D:\projecttemp\FD080412dM\FD070412dMavril04.msm

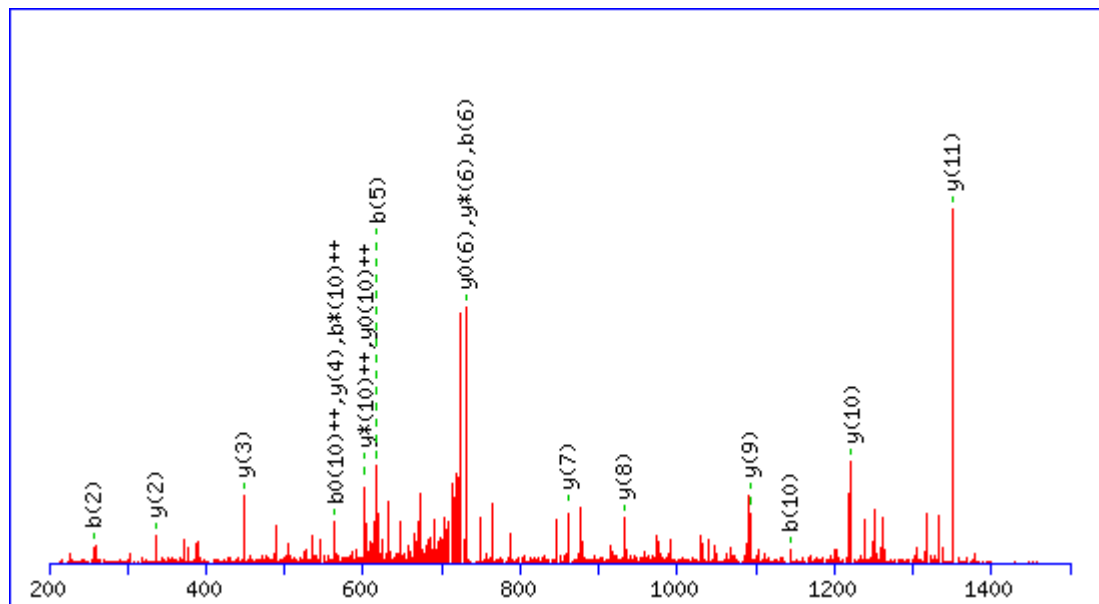

**Monoisotopic mass of neutral peptide Mr(calc):** 1476.670090

**Fixed modifications:** Carbamidomethyl (C)

**Variable modifications:**

**N-term :** Dimethyl (N-term)

**Ions Score:** 45 **Expect:** 0.0038

**Matches (Bold Red):** 18/110 fragment ions using 46 most intense peaks

| #  | b                  | b <sup>++</sup> | b*          | b <sup>*++</sup>  | b <sup>0</sup> | b <sup>0++</sup>  | Seq. | y                  | y <sup>++</sup> | y*                | y <sup>*++</sup>  | y <sup>0</sup>    | y <sup>0++</sup>  | #  |
|----|--------------------|-----------------|-------------|-------------------|----------------|-------------------|------|--------------------|-----------------|-------------------|-------------------|-------------------|-------------------|----|
| 1  | 128.106986         | 64.557131       |             |                   |                |                   | V    |                    |                 |                   |                   |                   |                   | 12 |
| 2  | <b>257.149579</b>  | 129.078428      |             |                   | 239.139014     | 120.073145        | E    | <b>1350.577663</b> | 675.792470      | 1333.551114       | 667.279195        | 1332.567098       | 666.787187        | 11 |
| 3  | 386.192172         | 193.599724      |             |                   | 368.181607     | 184.594442        | E    | <b>1221.535070</b> | 611.271173      | 1204.508521       | <b>602.757899</b> | 1203.524505       | <b>602.265891</b> | 10 |
| 4  | 546.222821         | 273.615049      |             |                   | 528.212256     | 264.609766        | C    | <b>1092.492477</b> | 546.749877      | 1075.465928       | 538.236602        | 1074.481912       | 537.744594        | 9  |
| 5  | <b>617.259935</b>  | 309.133606      |             |                   | 599.249370     | 300.128323        | A    | <b>932.461828</b>  | 466.734552      | 915.435279        | 458.221278        | 914.451263        | 457.729270        | 8  |
| 6  | <b>730.343999</b>  | 365.675638      |             |                   | 712.333434     | 356.670355        | L    | <b>861.424714</b>  | 431.215995      | 844.398165        | 422.702721        | 843.414149        | 422.210713        | 7  |
| 7  | 787.365463         | 394.186370      |             |                   | 769.354898     | 385.181087        | G    | 748.340650         | 374.673963      | <b>731.314101</b> | 366.160689        | <b>730.330085</b> | 365.668681        | 6  |
| 8  | 915.424041         | 458.215659      | 898.397492  | 449.702384        | 897.413476     | 449.210376        | Q    | 691.319186         | 346.163231      | 674.292637        | 337.649957        | 673.308621        | 337.157949        | 5  |
| 9  | 1030.450984        | 515.729130      | 1013.424435 | 507.215856        | 1012.440419    | 506.723848        | D    | <b>563.260608</b>  | 282.133942      | 546.234059        | 273.620668        | 545.250043        | 273.128660        | 4  |
| 10 | <b>1143.535048</b> | 572.271162      | 1126.508499 | <b>563.757888</b> | 1125.524483    | <b>563.265880</b> | L    | <b>448.233665</b>  | 224.620470      | 431.207116        | 216.107196        |                   |                   | 3  |
| 11 | 1303.565697        | 652.286487      | 1286.539148 | 643.773212        | 1285.555132    | 643.281204        | C    | <b>335.149601</b>  | 168.078438      | 318.123052        | 159.565164        |                   |                   | 2  |
| 12 |                    |                 |             |                   |                |                   | R    | 175.118952         | 88.063114       | 158.092403        | 79.549839         |                   |                   | 1  |

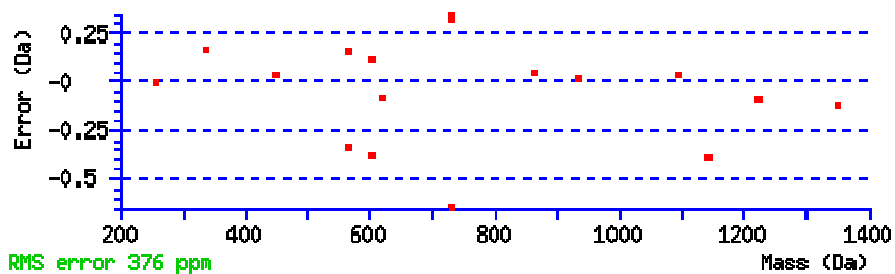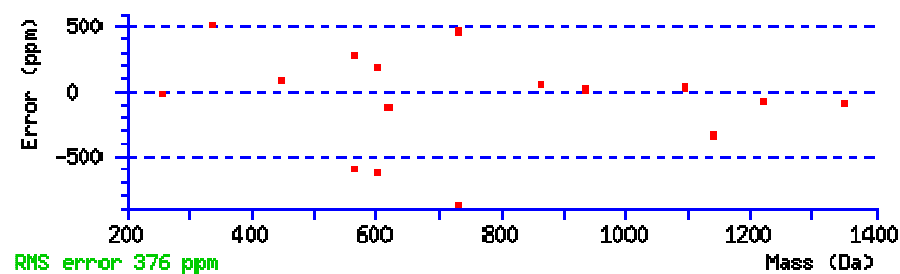

All matches to this query

| Score | Mr(calc):   | Delta     | Sequence                      |
|-------|-------------|-----------|-------------------------------|
| 45.1  | 1476.670090 | 0.008262  | <a href="#">VEECALGQDLCR</a>  |
| 6.6   | 1476.676590 | 0.001762  | <a href="#">LDQSMEEENQDLK</a> |
| 5.2   | 1475.668320 | 1.010032  | <a href="#">GEKPCTACPLCR</a>  |
| 3.5   | 1476.684479 | -0.006127 | <a href="#">DPYQQDLGIGESR</a> |
| 1.9   | 1475.660934 | 1.017418  | <a href="#">VQNTCKDNPCGR</a>  |
| 0.5   | 1475.668320 | 1.010032  | <a href="#">GEKPCTACPLCR</a>  |

MS/MS Fragmentation of **VGQDPVLR**

Found in **IPI00029744.1**, Tax\_Id=9606 Gene\_Symbol=SSBP1 Single-stranded DNA-binding protein, mitochondrial

Match to Query 3061: 911.530662 from(456.772607,2+)

Title: Elution from: 20.83 to 24.82 period: FD070412dMavril06.raw experiment: 1 cycles: 1 precIntensity: 372941.7 FinneganScanNumber: 1254

Data file D:\projecttemp\FD080412dM\FD070412dMavril06.msm

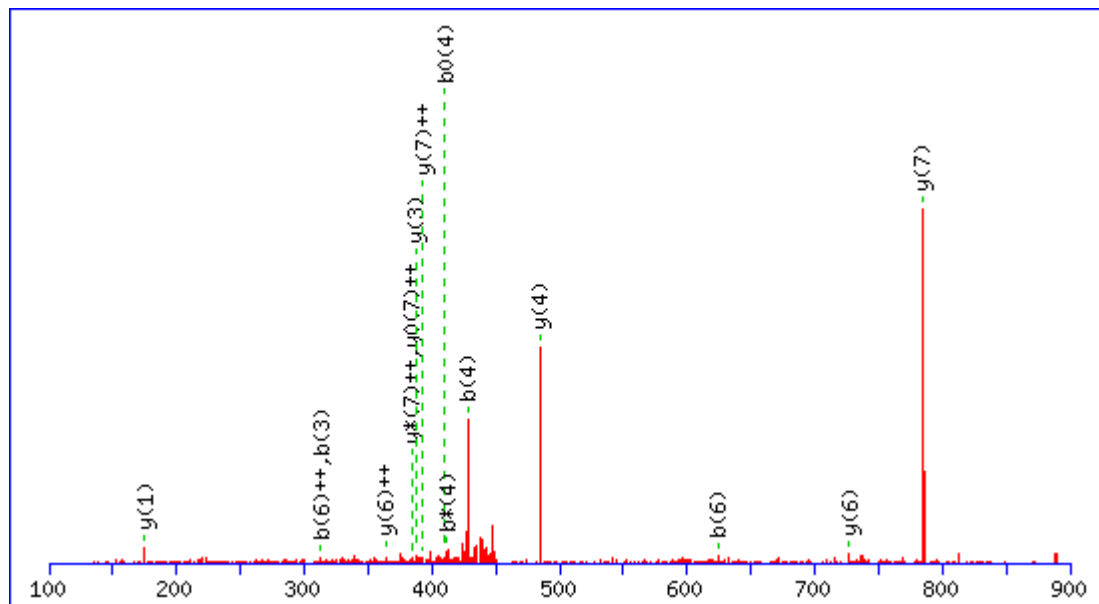

**Monoisotopic mass of neutral peptide Mr(calc):** 910.523621

**Fixed modifications:** Carbamidomethyl (C)

**Variable modifications:**

**N-term :** Dimethyl (N-term)

**Ions Score:** 41 **Expect:** 0.013

**Matches (Bold Red):** 15/66 fragment ions using 27 most intense peaks

| # | b          | b <sup>++</sup> | b <sup>*</sup> | b <sup>*++</sup> | b <sup>0</sup> | b <sup>0++</sup> | Seq. | y          | y <sup>++</sup> | y <sup>*</sup> | y <sup>*++</sup> | y <sup>0</sup> | y <sup>0++</sup> | # |
|---|------------|-----------------|----------------|------------------|----------------|------------------|------|------------|-----------------|----------------|------------------|----------------|------------------|---|
| 1 | 128.106986 | 64.557131       |                |                  |                |                  | V    |            |                 |                |                  |                |                  | 8 |
| 2 | 185.128450 | 93.067863       |                |                  |                |                  | G    | 784.431179 | 392.719228      | 767.404630     | 384.205953       | 766.420614     | 383.713945       | 7 |
| 3 | 313.187028 | 157.097152      | 296.160479     | 148.583877       |                |                  | Q    | 727.409715 | 364.208496      | 710.383166     | 355.695221       | 709.399150     | 355.203213       | 6 |
| 4 | 428.213971 | 214.610624      | 411.187422     | 206.097349       | 410.203406     | 205.605341       | D    | 599.351137 | 300.179207      | 582.324588     | 291.665932       | 581.340572     | 291.173924       | 5 |
| 5 | 525.266735 | 263.137006      | 508.240186     | 254.623731       | 507.256170     | 254.131723       | P    | 484.324194 | 242.665735      | 467.297645     | 234.152460       |                |                  | 4 |
| 6 | 624.335149 | 312.671213      | 607.308600     | 304.157938       | 606.324584     | 303.665930       | V    | 387.271430 | 194.139353      | 370.244881     | 185.626078       |                |                  | 3 |
| 7 | 737.419213 | 369.213245      | 720.392664     | 360.699970       | 719.408648     | 360.207962       | L    | 288.203016 | 144.605146      | 271.176467     | 136.091871       |                |                  | 2 |
| 8 |            |                 |                |                  |                |                  | R    | 175.118952 | 88.063114       | 158.092403     | 79.549839        |                |                  | 1 |

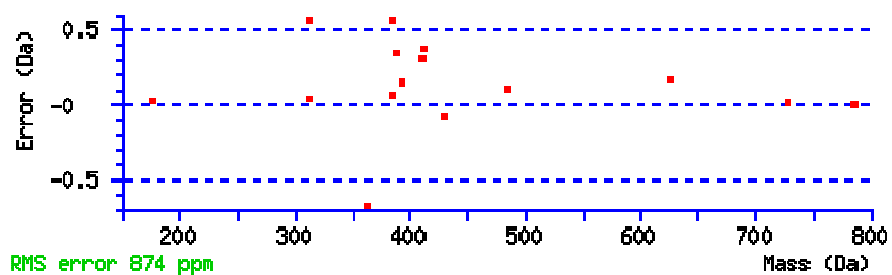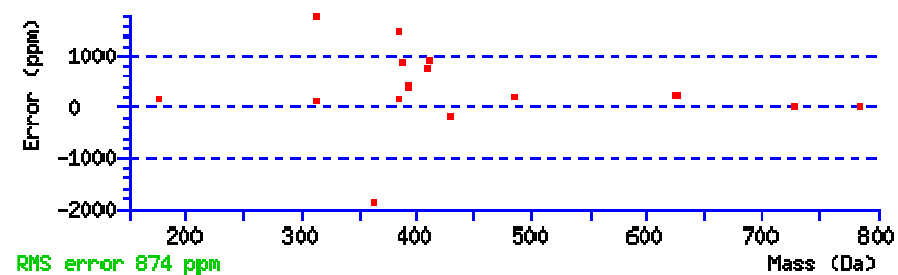

#### All matches to this query

| Score | Mr(calc):  | Delta    | Sequence                  |
|-------|------------|----------|---------------------------|
| 41.4  | 910.523621 | 1.007041 | <a href="#">VGQDPVLR</a>  |
| 24.9  | 910.534805 | 0.995857 | <a href="#">AAAANGPKR</a> |
| 16.4  | 911.530075 | 0.000587 | <a href="#">KPQLDRR</a>   |
| 16.4  | 911.530075 | 0.000587 | <a href="#">KQPLDRR</a>   |
| 13.6  | 910.530991 | 0.999671 | <a href="#">VPMAAAVPK</a> |
| 13.4  | 911.526245 | 0.004417 | <a href="#">AGVCPKPK</a>  |
| 13.1  | 910.523590 | 1.007072 | <a href="#">PSEAVPRK</a>  |
| 12.9  | 909.525665 | 2.004997 | <a href="#">SGPRGRPR</a>  |
| 12.1  | 911.530060 | 0.000602 | <a href="#">AGAREPRK</a>  |
| 10.7  | 911.530090 | 0.000572 | <a href="#">KGGORPGGK</a> |



MS/MS Fragmentation of **VIGLSSDLQQVGGASAR**

Found in **IPI00654777.2**, Tax\_Id=9606 Gene\_Symbol=EIF3F HCG1784554, isoform CRA\_a

Match to Query 5628: 1684.919212 from(843.466882,2+)

Title: Elution from: 35.70 to 39.53 period: FD070412dMavril05.raw experiment: 1 cycles: 1 precIntensity: 596644.4 FinneganScanNumber: 2397

Data file D:\projecttemp\FD080412dM\FD070412dMavril05.msm

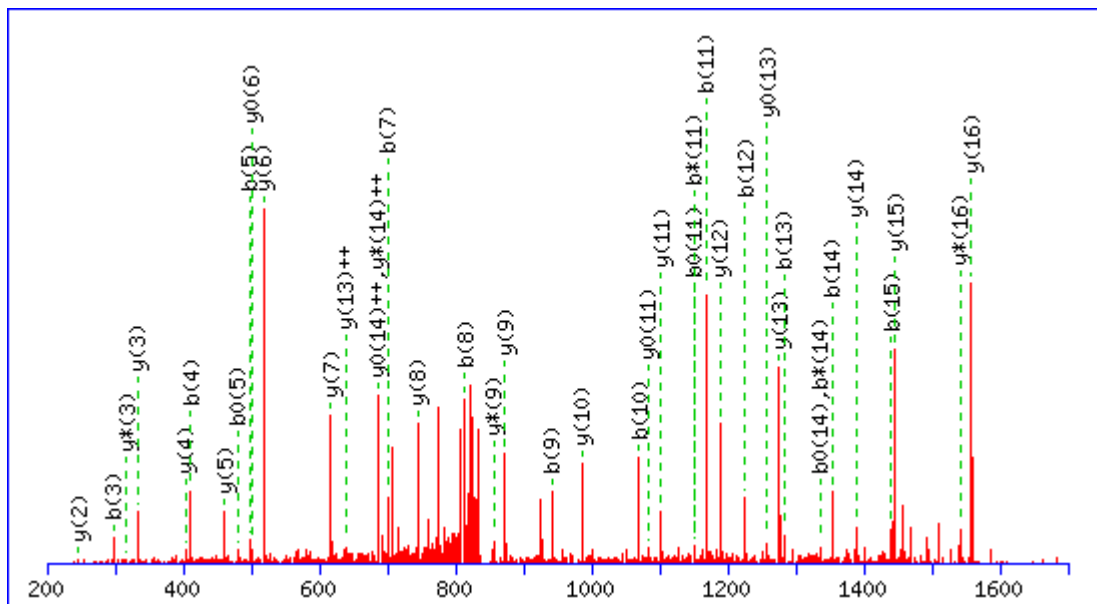

**Monoisotopic mass of neutral peptide Mr(calc):** 1684.910797

**Fixed modifications:** Carbamidomethyl (C)

**Variable modifications:**

**N-term :** Dimethyl (N-term)

**Ions Score:** 101 **Expect:** 3.1e-08

**Matches (Bold Red):** 41/164 fragment ions using 86 most intense peaks

| #  | b           | b <sup>++</sup> | b*          | b <sup>*++</sup> | b <sup>0</sup> | b <sup>0++</sup> | Seq. | y           | y <sup>++</sup> | y*          | y <sup>*++</sup> | y <sup>0</sup> | y <sup>0++</sup> | #  |
|----|-------------|-----------------|-------------|------------------|----------------|------------------|------|-------------|-----------------|-------------|------------------|----------------|------------------|----|
| 1  | 128.106986  | 64.557131       |             |                  |                |                  | V    |             |                 |             |                  |                |                  | 17 |
| 2  | 241.191050  | 121.099163      |             |                  |                |                  | I    | 1558.818361 | 779.912818      | 1541.791812 | 771.399544       | 1540.807796    | 770.907536       | 16 |
| 3  | 298.212514  | 149.609895      |             |                  |                |                  | G    | 1445.734297 | 723.370787      | 1428.707748 | 714.857512       | 1427.723732    | 714.365504       | 15 |
| 4  | 411.296578  | 206.151927      |             |                  |                |                  | L    | 1388.712833 | 694.860054      | 1371.686284 | 686.346780       | 1370.702268    | 685.854772       | 14 |
| 5  | 498.328606  | 249.667941      |             |                  | 480.318041     | 240.662658       | S    | 1275.628769 | 638.318022      | 1258.602220 | 629.804748       | 1257.618204    | 629.312740       | 13 |
| 6  | 585.360634  | 293.183955      |             |                  | 567.350069     | 284.178673       | S    | 1188.596741 | 594.802009      | 1171.570192 | 586.288734       | 1170.586176    | 585.796726       | 12 |
| 7  | 700.387577  | 350.697427      |             |                  | 682.377012     | 341.692144       | D    | 1101.564713 | 551.285995      | 1084.538164 | 542.772720       | 1083.554148    | 542.280712       | 11 |
| 8  | 813.471641  | 407.239459      |             |                  | 795.461076     | 398.234176       | L    | 986.537770  | 493.772523      | 969.511221  | 485.259249       | 968.527205     | 484.767241       | 10 |
| 9  | 941.530219  | 471.268748      | 924.503670  | 462.755473       | 923.519654     | 462.263465       | Q    | 873.453706  | 437.230491      | 856.427157  | 428.717217       | 855.443141     | 428.225209       | 9  |
| 10 | 1069.588797 | 535.298037      | 1052.562248 | 526.784762       | 1051.578232    | 526.292754       | Q    | 745.395128  | 373.201202      | 728.368579  | 364.687928       | 727.384563     | 364.195920       | 8  |
| 11 | 1168.657211 | 584.832244      | 1151.630662 | 576.318969       | 1150.646646    | 575.826961       | V    | 617.336550  | 309.171913      | 600.310001  | 300.658638       | 599.325985     | 300.166630       | 7  |
| 12 | 1225.678675 | 613.342976      | 1208.652126 | 604.829701       | 1207.668110    | 604.337693       | G    | 518.268136  | 259.637706      | 501.241587  | 251.124431       | 500.257571     | 250.632423       | 6  |
| 13 | 1282.700139 | 641.853708      | 1265.673590 | 633.340433       | 1264.689574    | 632.848425       | G    | 461.246672  | 231.126974      | 444.220123  | 222.613699       | 443.236107     | 222.121691       | 5  |
| 14 | 1353.737253 | 677.372265      | 1336.710704 | 668.858990       | 1335.726688    | 668.366982       | A    | 404.225208  | 202.616242      | 387.198659  | 194.102967       | 386.214643     | 193.610959       | 4  |
| 15 | 1440.769281 | 720.888279      | 1423.742732 | 712.375004       | 1422.758716    | 711.882996       | S    | 333.188094  | 167.097685      | 316.161545  | 158.584410       | 315.177529     | 158.092402       | 3  |
| 16 | 1511.806395 | 756.406836      | 1494.779846 | 747.893561       | 1493.795830    | 747.401553       | A    | 246.156066  | 123.581671      | 229.129517  | 115.068396       |                |                  | 2  |
| 17 |             |                 |             |                  |                |                  | R    | 175.118952  | 88.063114       | 158.092403  | 79.549839        |                |                  | 1  |

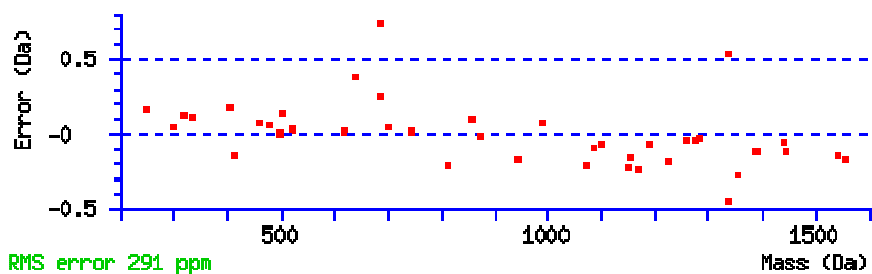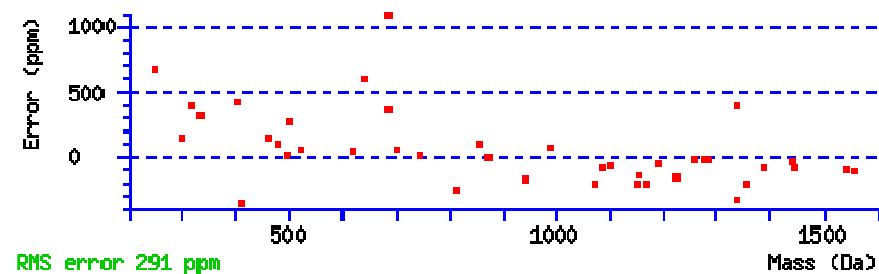

All matches to this query

| Score | Mr(calc):   | Delta     | Sequence                          |
|-------|-------------|-----------|-----------------------------------|
| 101.0 | 1684.910797 | 0.008415  | <a href="#">VIGLSSDLQOVGGASAR</a> |
| 5.4   | 1684.929367 | -0.010155 | <a href="#">LLNEMAIKERVEGR</a>    |

|     |             |           |                                  |
|-----|-------------|-----------|----------------------------------|
| 5.0 | 1682.916443 | 2.002769  | <a href="#">LLEPADMVLLSVPDK</a>  |
| 4.6 | 1683.915512 | 1.003700  | <a href="#">IPSESGEKLKVVNER</a>  |
| 2.4 | 1684.930084 | -0.010872 | <a href="#">FWVVGAGPEVLISAGR</a> |
| 2.2 | 1683.904297 | 1.014915  | <a href="#">ESVVGDIKDVKNEK</a>   |
| 1.9 | 1684.918167 | 0.001045  | <a href="#">EVNCLTLKDLISPR</a>   |
| 1.5 | 1682.906555 | 2.012657  | <a href="#">TFIVGAQMNVKEFK</a>   |
| 0.6 | 1682.907242 | 2.011970  | <a href="#">KNMGGLGGLVHGKMGR</a> |
| 0.6 | 1682.907242 | 2.011970  | <a href="#">KNMGGLGGLVHGKMGR</a> |

---

MS/MS Fragmentation of **VITIMQNPR**

Found in **IPI00013296.3**, Tax\_Id=9606 Gene\_Symbol=RPS18;LOC100130553 40S ribosomal protein S18

Match to Query 3895: 1098.623832 from(550.319192,2+)

Title: Elution from: 29.09 to 33.04 period: FD070412dMavril06.raw experiment: 1 cycles: 1 precIntensity: 1259126.7 FinneganScanNumber: 1870

Data file D:\projecttemp\FD080412dM\FD070412dMavril06.msm

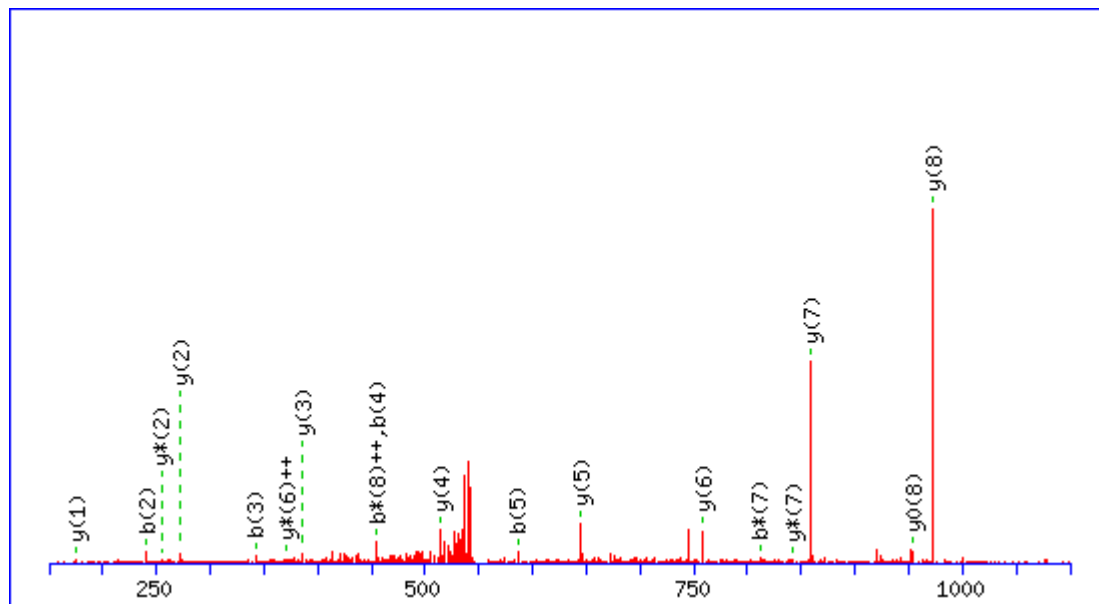

**Monoisotopic mass of neutral peptide Mr(calc):** 1098.621933

**Fixed modifications:** Carbamidomethyl (C)

**Variable modifications:**

**N-term :** Dimethyl (N-term)

**Ions Score:** 45 **Expect:** 0.0096

**Matches (Bold Red):** 18/70 fragment ions using 44 most intense peaks

| # | b                 | b <sup>++</sup> | b*                | b <sup>*++</sup>  | b <sup>0</sup> | b <sup>0++</sup> | Seq. | y                 | y <sup>++</sup> | y*                | y <sup>*++</sup>  | y <sup>0</sup>    | y <sup>0++</sup> | # |
|---|-------------------|-----------------|-------------------|-------------------|----------------|------------------|------|-------------------|-----------------|-------------------|-------------------|-------------------|------------------|---|
| 1 | 128.106986        | 64.557131       |                   |                   |                |                  | V    |                   |                 |                   |                   |                   |                  | 9 |
| 2 | <b>241.191050</b> | 121.099163      |                   |                   |                |                  | I    | <b>972.529513</b> | 486.768395      | 955.502964        | 478.255120        | <b>954.518948</b> | 477.763112       | 8 |
| 3 | <b>342.238729</b> | 171.623002      |                   |                   | 324.228164     | 162.617720       | T    | <b>859.445449</b> | 430.226363      | <b>842.418900</b> | 421.713088        | 841.434884        | 421.221080       | 7 |
| 4 | <b>455.322793</b> | 228.165034      |                   |                   | 437.312228     | 219.159752       | I    | <b>758.397770</b> | 379.702523      | 741.371221        | <b>371.189249</b> |                   |                  | 6 |
| 5 | <b>586.363278</b> | 293.685277      |                   |                   | 568.352713     | 284.679995       | M    | <b>645.313706</b> | 323.160491      | 628.287157        | 314.647217        |                   |                  | 5 |
| 6 | 714.421856        | 357.714566      | 697.395307        | 349.201292        | 696.411291     | 348.709284       | Q    | <b>514.273221</b> | 257.640249      | 497.246672        | 249.126974        |                   |                  | 4 |
| 7 | 828.464783        | 414.736030      | <b>811.438234</b> | 406.222755        | 810.454218     | 405.730747       | N    | <b>386.214643</b> | 193.610959      | 369.188094        | 185.097685        |                   |                  | 3 |
| 8 | 925.517547        | 463.262412      | 908.490998        | <b>454.749137</b> | 907.506982     | 454.257129       | P    | <b>272.171716</b> | 136.589496      | <b>255.145167</b> | 128.076221        |                   |                  | 2 |
| 9 |                   |                 |                   |                   |                |                  | R    | <b>175.118952</b> | 88.063114       | 158.092403        | 79.549839         |                   |                  | 1 |

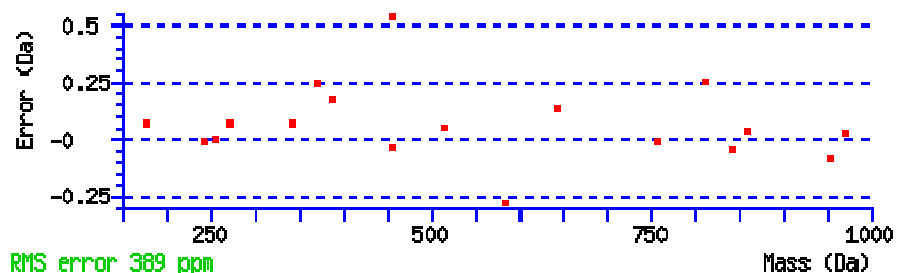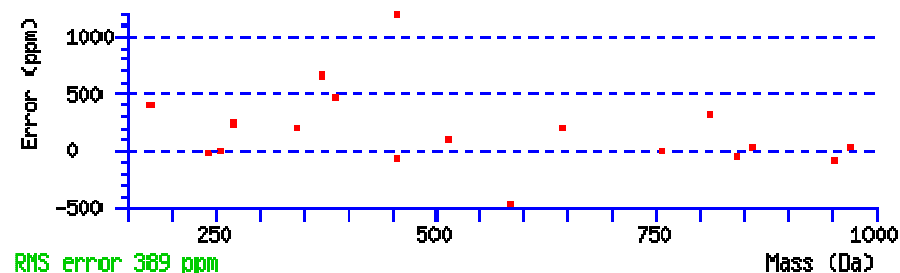

All matches to this query

| Score | Mr(calc):   | Delta     | Sequence                    |
|-------|-------------|-----------|-----------------------------|
| 45.1  | 1098.621933 | 0.001899  | <a href="#">VITIMQNPR</a>   |
| 9.7   | 1098.633163 | -0.009331 | <a href="#">VLSCPRLALR</a>  |
| 9.5   | 1098.628448 | -0.004616 | <a href="#">VLLDNVENK</a>   |
| 9.3   | 1096.624039 | 1.999793  | <a href="#">PLPDSTRQK</a>   |
| 9.2   | 1096.610123 | 2.013709  | <a href="#">HTTLREKGR</a>   |
| 9.1   | 1098.614517 | 0.009315  | <a href="#">AAKESGAKGPR</a> |
| 7.0   | 1096.624023 | 1.999809  | <a href="#">PAEVSKASPR</a>  |
| 6.9   | 1097.626663 | 0.997169  | <a href="#">MLKPALEPR</a>   |
| 6.7   | 1096.617508 | 2.006324  | <a href="#">HTPMGKKSRL</a>  |
| 6.2   | 1098.625778 | -0.001946 | <a href="#">TQRLSKGGPR</a>  |



MS/MS Fragmentation of **VLEGMEVVR**

Found in **IPI00646304.4**, Tax\_Id=9606 Gene\_Symbol=PPIB Peptidyl-prolyl cis-trans isomerase B

Match to Query 3654: 1058.581802 from(530.298177,2+)

Title: Elution from: 30.77 to 34.72 period: FD070412dMavril06.raw experiment: 1 cycles: 1 precIntensity: 1367854.7 FinneganScanNumber: 1999

Data file D:\projecttemp\FD080412dM\FD070412dMavril06.msm

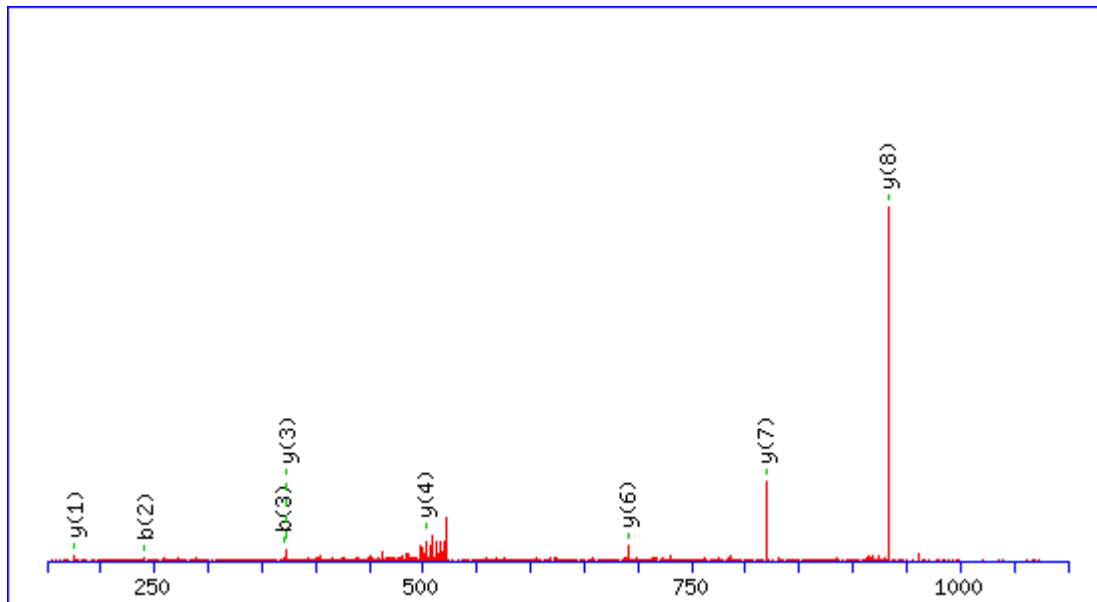

**Monoisotopic mass of neutral peptide Mr(calc):** 1058.579407

**Fixed modifications:** Carbamidomethyl (C)

**Variable modifications:**

**N-term :** Dimethyl (N-term)

**Ions Score:** 34 **Expect:** 0.15

**Matches (Bold Red):** 8/70 fragment ions using 22 most intense peaks

| # | b                 | b <sup>++</sup> | b <sup>0</sup> | b <sup>0++</sup> | Seq. | y                 | y <sup>++</sup> | y <sup>*</sup> | y <sup>*++</sup> | y <sup>0</sup> | y <sup>0++</sup> | # |
|---|-------------------|-----------------|----------------|------------------|------|-------------------|-----------------|----------------|------------------|----------------|------------------|---|
| 1 | 128.106986        | 64.557131       |                |                  | V    |                   |                 |                |                  |                |                  | 9 |
| 2 | <b>241.191050</b> | 121.099163      |                |                  | L    | <b>932.486979</b> | 466.747128      | 915.460430     | 458.233853       | 914.476414     | 457.741845       | 8 |
| 3 | <b>370.233643</b> | 185.620459      | 352.223078     | 176.615177       | E    | <b>819.402915</b> | 410.205096      | 802.376366     | 401.691821       | 801.392350     | 401.199813       | 7 |
| 4 | 427.255107        | 214.131191      | 409.244542     | 205.125909       | G    | <b>690.360322</b> | 345.683799      | 673.333773     | 337.170525       | 672.349757     | 336.678517       | 6 |
| 5 | 558.295592        | 279.651434      | 540.285027     | 270.646152       | M    | 633.338858        | 317.173067      | 616.312309     | 308.659793       | 615.328293     | 308.167785       | 5 |
| 6 | 687.338185        | 344.172731      | 669.327620     | 335.167448       | E    | <b>502.298373</b> | 251.652824      | 485.271824     | 243.139550       | 484.287808     | 242.647542       | 4 |
| 7 | 786.406599        | 393.706938      | 768.396034     | 384.701655       | V    | <b>373.255780</b> | 187.131528      | 356.229231     | 178.618253       |                |                  | 3 |
| 8 | 885.475013        | 443.241145      | 867.464448     | 434.235862       | V    | 274.187366        | 137.597321      | 257.160817     | 129.084046       |                |                  | 2 |
| 9 |                   |                 |                |                  | R    | <b>175.118952</b> | 88.063114       | 158.092403     | 79.549840        |                |                  | 1 |

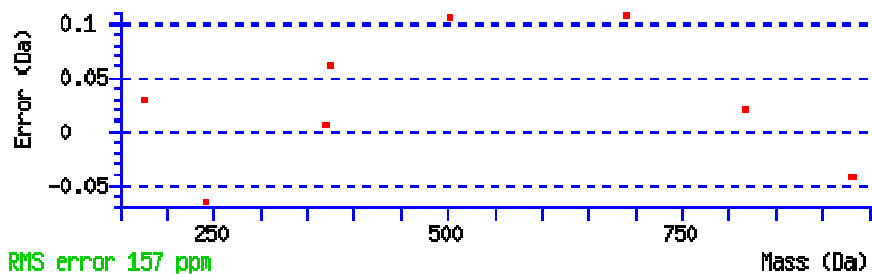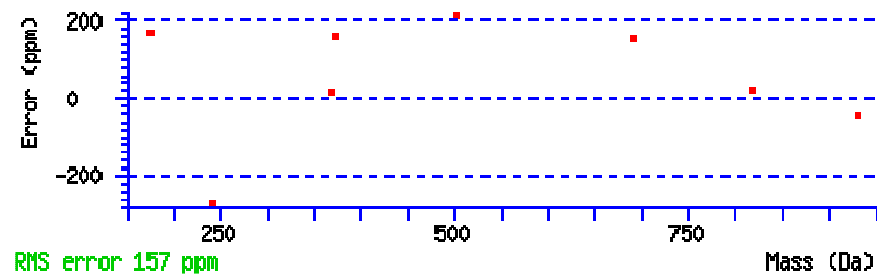

All matches to this query

| Score | Mr(calc):   | Delta     | Sequence                   |
|-------|-------------|-----------|----------------------------|
| 34.5  | 1058.579407 | 0.002395  | <a href="#">VLEGMEVVR</a>  |
| 13.3  | 1056.567581 | 2.014221  | <a href="#">PRSASDAGIR</a> |
| 12.1  | 1058.585922 | -0.004120 | <a href="#">VLEDVEISK</a>  |
| 12.0  | 1058.590652 | -0.008850 | <a href="#">VIQGVCLSR</a>  |
| 12.0  | 1058.576019 | 0.005783  | <a href="#">VLSIWEER</a>   |
| 12.0  | 1058.579407 | 0.002395  | <a href="#">VLSVCPSNK</a>  |
| 11.4  | 1056.570251 | 2.011551  | <a href="#">PELLESADK</a>  |
| 11.4  | 1058.572861 | 0.008941  | <a href="#">VELMPRMR</a>   |
| 11.4  | 1058.571991 | 0.009811  | <a href="#">VELSNGEKR</a>  |
| 11.4  | 1056.574982 | 2.006820  | <a href="#">PSCANVLLR</a>  |





MS/MS Fragmentation of **VSFVNLNDQSGNGDR**

Found in **IPI00168408.1**, Tax\_Id=9606 Gene\_Symbol=WDR20 WDR20 protein

Match to Query 5846: 1648.790406 from(825.402479,2+)

Title: Elution from: 32.68 to 36.48 period: FD070412dMavril04.raw experiment: 1 cycles: 1 precIntensity: 241317.6 FinneganScanNumber: 2213

Data file D:\projecttemp\FD080412dM\FD070412dMavril04.msm

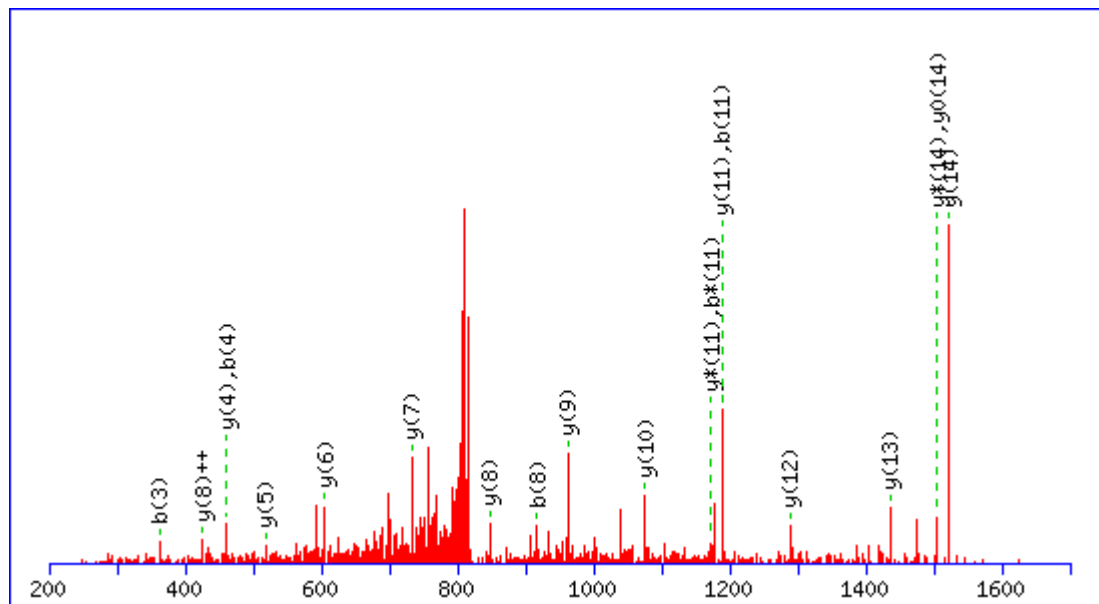

**Monoisotopic mass of neutral peptide Mr(calc):** 1648.780518

**Fixed modifications:** Carbamidomethyl (C)

**Variable modifications:**

**N-term :** Dimethyl (N-term)

**Ions Score:** 76 **Expect:** 6.4e-06

**Matches (Bold Red):** 20/156 fragment ions using 40 most intense peaks

| #  | b           | b <sup>++</sup> | b*          | b <sup>*++</sup> | b <sup>0</sup> | b <sup>0++</sup> | Seq. | y           | y <sup>++</sup> | y*          | y <sup>*++</sup> | y <sup>0</sup> | y <sup>0++</sup> | #  |
|----|-------------|-----------------|-------------|------------------|----------------|------------------|------|-------------|-----------------|-------------|------------------|----------------|------------------|----|
| 1  | 128.106986  | 64.557131       |             |                  |                |                  | V    |             |                 |             |                  |                |                  | 15 |
| 2  | 215.139014  | 108.073145      |             |                  | 197.128449     | 99.067862        | S    | 1522.688073 | 761.847674      | 1505.661524 | 753.334400       | 1504.677508    | 752.842392       | 14 |
| 3  | 362.207428  | 181.607352      |             |                  | 344.196863     | 172.602069       | F    | 1435.656045 | 718.331660      | 1418.629496 | 709.818386       | 1417.645480    | 709.326378       | 13 |
| 4  | 461.275842  | 231.141559      |             |                  | 443.265277     | 222.136277       | V    | 1288.587631 | 644.797453      | 1271.561082 | 636.284179       | 1270.577066    | 635.792171       | 12 |
| 5  | 575.318769  | 288.163023      | 558.292220  | 279.649748       | 557.308204     | 279.157740       | N    | 1189.519217 | 595.263246      | 1172.492668 | 586.749972       | 1171.508652    | 586.257964       | 11 |
| 6  | 688.402833  | 344.705055      | 671.376284  | 336.191780       | 670.392268     | 335.699772       | L    | 1075.476290 | 538.241783      | 1058.449741 | 529.728508       | 1057.465725    | 529.236500       | 10 |
| 7  | 802.445760  | 401.726518      | 785.419211  | 393.213244       | 784.435195     | 392.721236       | N    | 962.392226  | 481.699751      | 945.365677  | 473.186476       | 944.381661     | 472.694468       | 9  |
| 8  | 917.472703  | 459.239990      | 900.446154  | 450.726715       | 899.462138     | 450.234707       | D    | 848.349299  | 424.678287      | 831.322750  | 416.165013       | 830.338734     | 415.673005       | 8  |
| 9  | 1045.531281 | 523.269279      | 1028.504732 | 514.756004       | 1027.520716    | 514.263996       | Q    | 733.322356  | 367.164816      | 716.295807  | 358.651541       | 715.311791     | 358.159533       | 7  |
| 10 | 1132.563309 | 566.785293      | 1115.536760 | 558.272018       | 1114.552744    | 557.780010       | S    | 605.263778  | 303.135527      | 588.237229  | 294.622252       | 587.253213     | 294.130244       | 6  |
| 11 | 1189.584773 | 595.296025      | 1172.558224 | 586.782750       | 1171.574208    | 586.290742       | G    | 518.231750  | 259.619513      | 501.205201  | 251.106238       | 500.221185     | 250.614230       | 5  |
| 12 | 1303.627700 | 652.317488      | 1286.601151 | 643.804214       | 1285.617135    | 643.312206       | N    | 461.210286  | 231.108781      | 444.183737  | 222.595506       | 443.199721     | 222.103498       | 4  |
| 13 | 1360.649164 | 680.828220      | 1343.622615 | 672.314946       | 1342.638599    | 671.822937       | G    | 347.167359  | 174.087317      | 330.140810  | 165.574043       | 329.156794     | 165.082035       | 3  |
| 14 | 1475.676107 | 738.341692      | 1458.649558 | 729.828417       | 1457.665542    | 729.336409       | D    | 290.145895  | 145.576585      | 273.119346  | 137.063311       | 272.135330     | 136.571303       | 2  |
| 15 |             |                 |             |                  |                |                  | R    | 175.118952  | 88.063114       | 158.092403  | 79.549839        |                |                  | 1  |

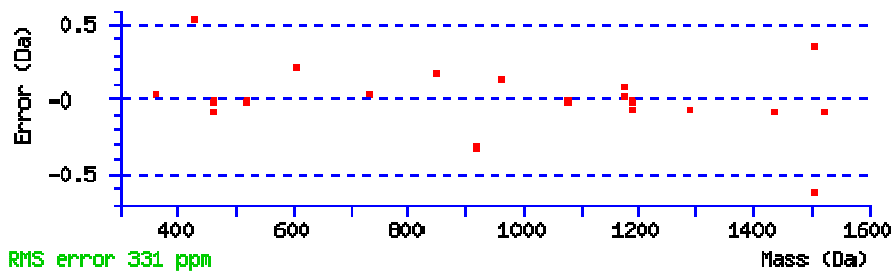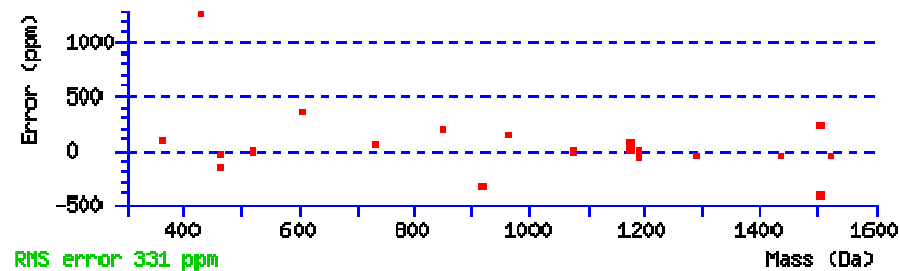

All matches to this query

| Score | Mr(calc):   | Delta    | Sequence                        |
|-------|-------------|----------|---------------------------------|
| 75.9  | 1648.780518 | 0.009888 | <a href="#">VSFVNLNDQSGNGDR</a> |
| 8.2   | 1647.777390 | 1.013016 | <a href="#">DLVDDTNGERSPKM</a>  |
| 5.8   | 1646.774734 | 2.015672 | <a href="#">PSEQKDSEQSGQSK</a>  |
| 4.2   | 1648.780884 | 0.009522 | <a href="#">MSVHMPAMKICEK</a>   |

|     |             |           |                                 |
|-----|-------------|-----------|---------------------------------|
| 1.6 | 1647.777405 | 1.013001  | <a href="#">DDQTNIGLTCQEVK</a>  |
| 1.3 | 1648.806503 | -0.016097 | <a href="#">LQKMALMSPWAGER</a>  |
| 1.3 | 1646.788635 | 2.001771  | <a href="#">NVLDSEDEIEELSK</a>  |
| 0.4 | 1646.774734 | 2.015672  | <a href="#">PSEQKDSEQGSGQSK</a> |

---

MS/MS Fragmentation of **YADLTEDQLPSCESLKDTIAR**

Found in **IPI00453476.2**, Tax\_Id=9606 Gene\_Symbol=- Uncharacterized protein ENSP00000348237

Match to Query 7606: 2480.226150 from(827.749326,3+)

Title: Elution from: 39.11 to 42.99 period: FD070412dMavril07.raw experiment: 1 cycles: 1 precIntensity: 441820.4 FinneganScanNumber: 2872

Data file D:\projecttemp\FD080412dM\FD070412dMavril07.msm

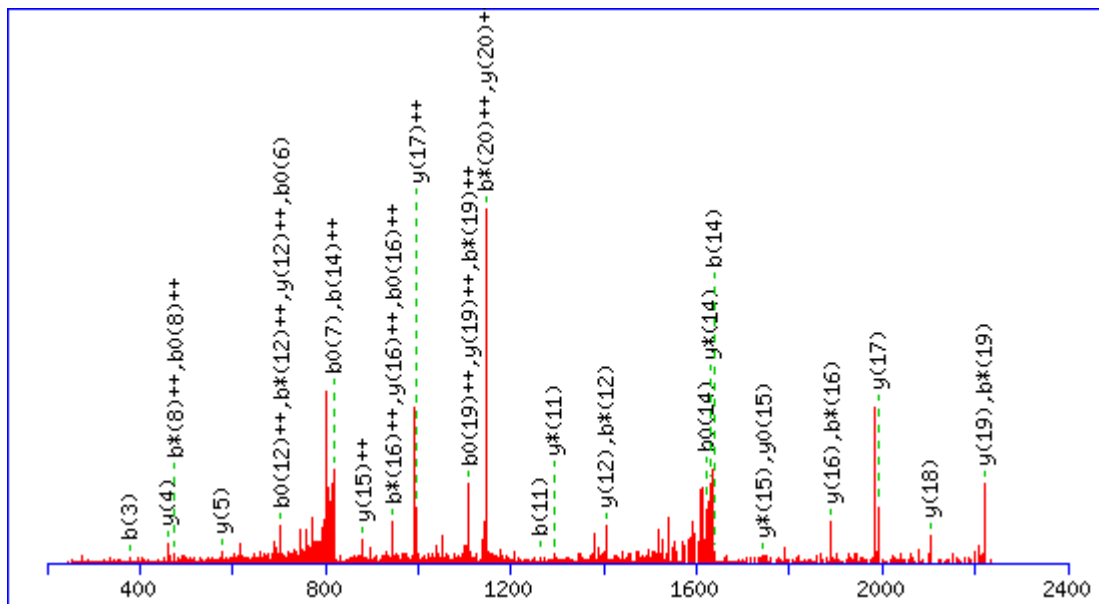

**Monoisotopic mass of neutral peptide Mr(calc):** 2480.210434

**Fixed modifications:** Carbamidomethyl (C)

**Variable modifications:**

**N-term :** Dimethyl (N-term)

**K16 :** Dimethyl (K)

**Ions Score:** 22 **Expect:** 2

**Matches (Bold Red):** 36/216 fragment ions using 55 most intense peaks

| #  | b           | b <sup>++</sup> | b*          | b <sup>*++</sup> | b <sup>0</sup> | b <sup>0++</sup> | Seq. | y           | y <sup>++</sup> | y*          | y <sup>*++</sup> | y <sup>0</sup> | y <sup>0++</sup> | #  |
|----|-------------|-----------------|-------------|------------------|----------------|------------------|------|-------------|-----------------|-------------|------------------|----------------|------------------|----|
| 1  | 192.101901  | 96.554588       |             |                  |                |                  | Y    |             |                 |             |                  |                |                  | 21 |
| 2  | 263.139015  | 132.073145      |             |                  |                |                  | A    | 2290.123115 | 1145.565195     | 2273.096566 | 1137.051921      | 2272.112550    | 1136.559913      | 20 |
| 3  | 378.165958  | 189.586617      |             |                  | 360.155393     | 180.581334       | D    | 2219.086001 | 1110.046638     | 2202.059452 | 1101.533364      | 2201.075436    | 1101.041356      | 19 |
| 4  | 491.250022  | 246.128649      |             |                  | 473.239457     | 237.123367       | L    | 2104.059058 | 1052.533167     | 2087.032509 | 1044.019892      | 2086.048493    | 1043.527884      | 18 |
| 5  | 592.297701  | 296.652489      |             |                  | 574.287136     | 287.647206       | T    | 1990.974994 | 995.991135      | 1973.948445 | 987.477861       | 1972.964429    | 986.985853       | 17 |
| 6  | 721.340294  | 361.173785      |             |                  | 703.329729     | 352.168503       | E    | 1889.927315 | 945.467296      | 1872.900766 | 936.954021       | 1871.916750    | 936.462013       | 16 |
| 7  | 836.367237  | 418.687257      |             |                  | 818.356672     | 409.681974       | D    | 1760.884722 | 880.945999      | 1743.858173 | 872.432725       | 1742.874157    | 871.940717       | 15 |
| 8  | 964.425815  | 482.716546      | 947.399266  | 474.203271       | 946.415250     | 473.711263       | Q    | 1645.857779 | 823.432528      | 1628.831230 | 814.919253       | 1627.847214    | 814.427245       | 14 |
| 9  | 1077.509879 | 539.258578      | 1060.483330 | 530.745303       | 1059.499314    | 530.253295       | L    | 1517.799201 | 759.403239      | 1500.772652 | 750.889964       | 1499.788636    | 750.397956       | 13 |
| 10 | 1174.562643 | 587.784960      | 1157.536094 | 579.271685       | 1156.552078    | 578.779677       | P    | 1404.715137 | 702.861207      | 1387.688588 | 694.347932       | 1386.704572    | 693.855924       | 12 |
| 11 | 1261.594671 | 631.300974      | 1244.568122 | 622.787699       | 1243.584106    | 622.295691       | S    | 1307.662373 | 654.334825      | 1290.635824 | 645.821550       | 1289.651808    | 645.329542       | 11 |
| 12 | 1421.625320 | 711.316298      | 1404.598771 | 702.803024       | 1403.614755    | 702.311016       | C    | 1220.630345 | 610.818811      | 1203.603796 | 602.305536       | 1202.619780    | 601.813528       | 10 |
| 13 | 1550.667913 | 775.837595      | 1533.641364 | 767.324320       | 1532.657348    | 766.832312       | E    | 1060.599696 | 530.803486      | 1043.573147 | 522.290212       | 1042.589131    | 521.798204       | 9  |
| 14 | 1637.699941 | 819.353609      | 1620.673392 | 810.840334       | 1619.689376    | 810.348326       | S    | 931.557103  | 466.282190      | 914.530554  | 457.768915       | 913.546538     | 457.276907       | 8  |
| 15 | 1750.784005 | 875.895641      | 1733.757456 | 867.382366       | 1732.773440    | 866.890358       | L    | 844.525075  | 422.766176      | 827.498526  | 414.252901       | 826.514510     | 413.760893       | 7  |
| 16 | 1906.910264 | 953.958770      | 1889.883715 | 945.445496       | 1888.899699    | 944.953488       | K    | 731.441011  | 366.224144      | 714.414462  | 357.710869       | 713.430446     | 357.218861       | 6  |
| 17 | 2021.937207 | 1011.472242     | 2004.910658 | 1002.958967      | 2003.926642    | 1002.466959      | D    | 575.314752  | 288.161014      | 558.288203  | 279.647740       | 557.304187     | 279.155732       | 5  |
| 18 | 2122.984886 | 1061.996081     | 2105.958337 | 1053.482806      | 2104.974321    | 1052.990798      | T    | 460.287809  | 230.647543      | 443.261260  | 222.134268       | 442.277244     | 221.642260       | 4  |
| 19 | 2236.068950 | 1118.538113     | 2219.042401 | 1110.024838      | 2218.058385    | 1109.532830      | I    | 359.240130  | 180.123703      | 342.213581  | 171.610429       |                |                  | 3  |
| 20 | 2307.106064 | 1154.056670     | 2290.079515 | 1145.543395      | 2289.095499    | 1145.051387      | A    | 246.156066  | 123.581671      | 229.129517  | 115.068397       |                |                  | 2  |
| 21 |             |                 |             |                  |                |                  | R    | 175.118952  | 88.063114       | 158.092403  | 79.549839        |                |                  | 1  |

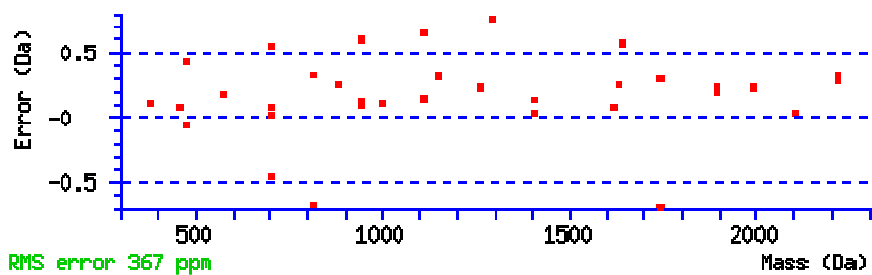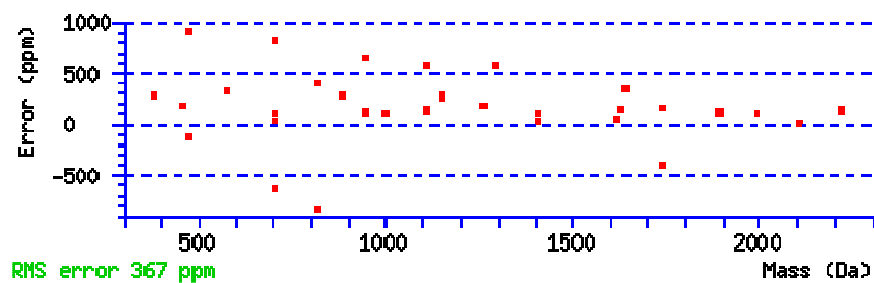

All matches to this query

| Score | Mr(calc):   | Delta     | Sequence                                  |
|-------|-------------|-----------|-------------------------------------------|
| 22.5  | 2480.210434 | 0.015716  | <a href="#">YADLTEDQLPSCESLKDTIAR</a>     |
| 7.4   | 2479.219040 | 1.007110  | <a href="#">SHPEPQTPKDSPSKSGSEAQTTK</a>   |
| 3.8   | 2480.236496 | -0.010346 | <a href="#">SFDMGGETLLSVCPMVPKDLGK</a>    |
| 3.5   | 2480.247528 | -0.021378 | <a href="#">MLQAARDMVTTAGVSSSLDRATR</a>   |
| 2.9   | 2480.211105 | 0.015045  | <a href="#">SFDLTPYRIFSFSAADSELEK</a>     |
| 0.6   | 2478.199539 | 2.026611  | <a href="#">SGSATTGPTTPCSPKHGAPAPQGMK</a> |
| 0.6   | 2480.244324 | -0.018174 | <a href="#">QFOELYLMHSVSLKGIPMEK</a>      |

MS/MS Fragmentation of **YPIEHGITNWDDMEK**

Found in **IPI00021428.1**, Tax\_Id=9606 Gene\_Symbol=ACTA1 Actin, alpha skeletal muscle

Match to Query 7018: 2015.971630 from(1008.993091,2+)

Title: Elution from: 38.96 to 42.84 period: FD070412dMavril07.raw experiment: 1 cycles: 1 precIntensity: 1603458.2 FinneganScanNumber: 2861

Data file D:\projecttemp\FD080412dM\FD070412dMavril07.msm

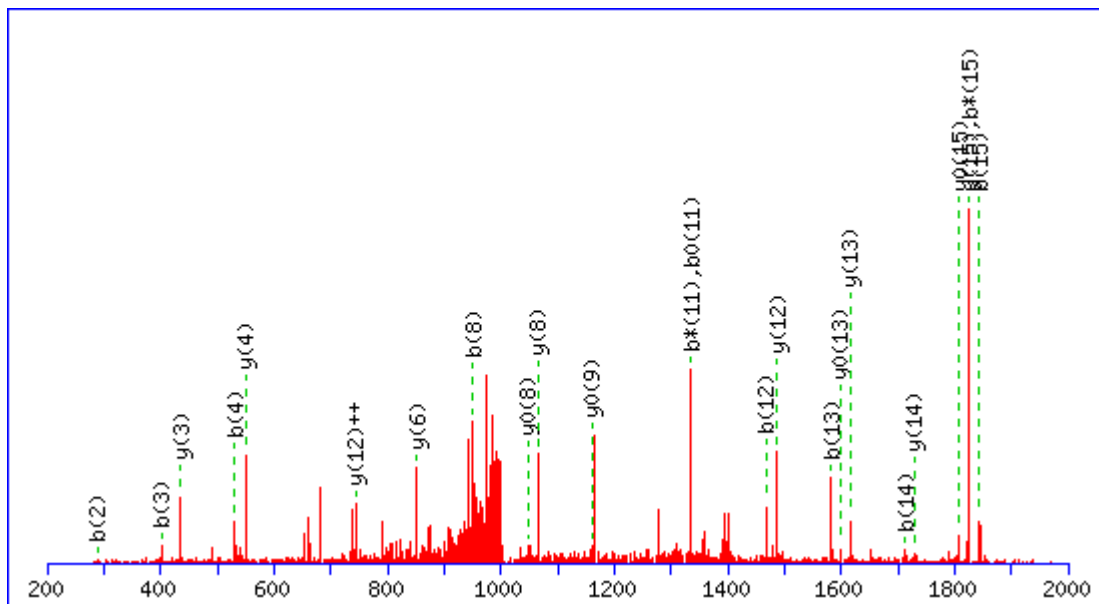

**Monoisotopic mass of neutral peptide Mr(calc):** 2015.966232

**Fixed modifications:** Carbamidomethyl (C)

**Variable modifications:**

**N-term :** Dimethyl (N-term)

**K16 :** Dimethyl (K)

**Ions Score:** 46 **Expect:** 0.0065

**Matches (Bold Red):** 24/154 fragment ions using 56 most intense peaks



| #  | b                  | b <sup>++</sup> | b*                 | b <sup>*++</sup> | b <sup>0</sup>     | b <sup>0++</sup> | Seq. | y                  | y <sup>++</sup>   | y*          | y <sup>*++</sup> | y <sup>0</sup>     | y <sup>0++</sup> | #  |
|----|--------------------|-----------------|--------------------|------------------|--------------------|------------------|------|--------------------|-------------------|-------------|------------------|--------------------|------------------|----|
| 1  | 192.101901         | 96.554588       |                    |                  |                    |                  | Y    |                    |                   |             |                  |                    |                  | 16 |
| 2  | <b>289.154665</b>  | 145.080970      |                    |                  |                    |                  | P    | <b>1825.878908</b> | 913.443092        | 1808.852359 | 904.929818       | <b>1807.868343</b> | 904.437810       | 15 |
| 3  | <b>402.238729</b>  | 201.623002      |                    |                  |                    |                  | I    | <b>1728.826144</b> | 864.916710        | 1711.799595 | 856.403436       | 1710.815579        | 855.911428       | 14 |
| 4  | <b>531.281322</b>  | 266.144299      |                    |                  | 513.270757         | 257.139017       | E    | <b>1615.742080</b> | 808.374678        | 1598.715531 | 799.861404       | <b>1597.731515</b> | 799.369396       | 13 |
| 5  | 668.340234         | 334.673755      |                    |                  | 650.329669         | 325.668473       | H    | <b>1486.699487</b> | <b>743.853382</b> | 1469.672938 | 735.340107       | 1468.688922        | 734.848099       | 12 |
| 6  | 725.361698         | 363.184487      |                    |                  | 707.351133         | 354.179205       | G    | 1349.640575        | 675.323926        | 1332.614026 | 666.810651       | 1331.630010        | 666.318643       | 11 |
| 7  | 838.445762         | 419.726519      |                    |                  | 820.435197         | 410.721237       | I    | 1292.619111        | 646.813194        | 1275.592562 | 638.299919       | 1274.608546        | 637.807911       | 10 |
| 8  | <b>951.529826</b>  | 476.268551      |                    |                  | 933.519261         | 467.263269       | I    | 1179.535047        | 590.271162        | 1162.508498 | 581.757887       | <b>1161.524482</b> | 581.265879       | 9  |
| 9  | 1052.577505        | 526.792391      |                    |                  | 1034.566940        | 517.787108       | T    | <b>1066.450983</b> | 533.729130        | 1049.424434 | 525.215855       | <b>1048.440418</b> | 524.723847       | 8  |
| 10 | 1166.620432        | 583.813854      | 1149.593883        | 575.300580       | 1148.609867        | 574.808572       | N    | 965.403304         | 483.205290        | 948.376755  | 474.692016       | 947.392739         | 474.200008       | 7  |
| 11 | 1352.699745        | 676.853511      | <b>1335.673196</b> | 668.340236       | <b>1334.689180</b> | 667.848228       | W    | <b>851.360377</b>  | 426.183827        | 834.333828  | 417.670552       | 833.349812         | 417.178544       | 6  |
| 12 | <b>1467.726688</b> | 734.366982      | 1450.700139        | 725.853708       | 1449.716123        | 725.361700       | D    | 665.281064         | 333.144170        | 648.254515  | 324.630896       | 647.270499         | 324.138888       | 5  |
| 13 | <b>1582.753631</b> | 791.880454      | 1565.727082        | 783.367179       | 1564.743066        | 782.875171       | D    | <b>550.254121</b>  | 275.630699        | 533.227572  | 267.117424       | 532.243556         | 266.625416       | 4  |
| 14 | <b>1713.794116</b> | 857.400696      | 1696.767567        | 848.887422       | 1695.783551        | 848.395414       | M    | <b>435.227178</b>  | 218.117227        | 418.200629  | 209.603953       | 417.216613         | 209.111945       | 3  |
| 15 | <b>1842.836709</b> | 921.921993      | <b>1825.810160</b> | 913.408718       | 1824.826144        | 912.916710       | E    | 304.186693         | 152.596985        | 287.160144  | 144.083710       | 286.176128         | 143.591702       | 2  |
| 16 |                    |                 |                    |                  |                    |                  | K    | 175.144100         | 88.075688         | 158.117551  | 79.562414        |                    |                  | 1  |

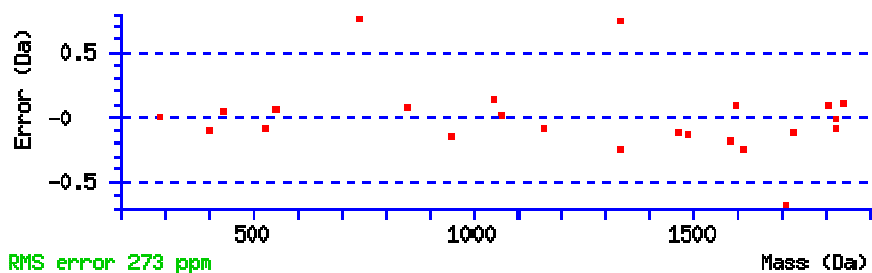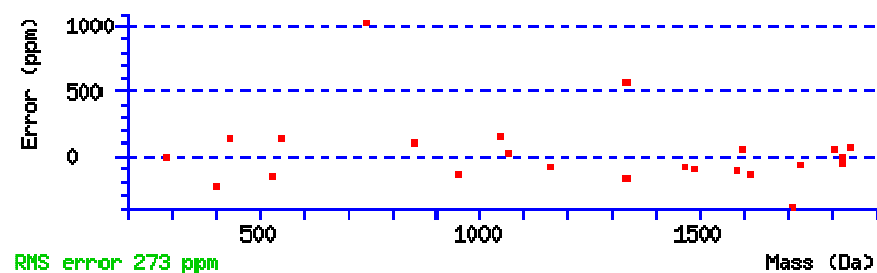

All matches to this query

| Score | Mr(calc):   | Delta     | Sequence                           |
|-------|-------------|-----------|------------------------------------|
| 45.9  | 2015.966232 | 0.005398  | <a href="#">YPIEHGITNWDDMEK</a>    |
| 5.0   | 2015.976837 | -0.005207 | <a href="#">MQVPNSTGPDNATLQMLR</a> |
| 4.6   | 2015.959091 | 0.012539  | <a href="#">MCVDSLVRICSGLSYGR</a>  |

|     |             |           |                                       |
|-----|-------------|-----------|---------------------------------------|
| 4.4 | 2015.980682 | -0.009052 | <a href="#">KCLEEGPGGAGSSTALGGRR</a>  |
| 3.6 | 2015.963577 | 0.008053  | <a href="#">CSGPVTLHYKVNHEGYR</a>     |
| 2.7 | 2015.976791 | -0.005161 | <a href="#">DGESEHKCAKMLENR</a>       |
| 2.6 | 2015.952316 | 0.019314  | <a href="#">NPFHASCWNTSAELLNK</a>     |
| 1.1 | 2015.955002 | 0.016628  | <a href="#">YKYPEFPVLECGDSEK</a>      |
| 0.9 | 2015.956192 | 0.015438  | <a href="#">TTSGPPNHHSSAPSHSLFR</a>   |
| 0.7 | 2015.970779 | 0.000851  | <a href="#">AAGSSGASMGWRGSPGRPSGR</a> |

MS/MS Fragmentation of **YSGSEGSTQTLTK**

Found in **IPI00017526.1**, Tax\_Id=9606 Gene\_Symbol=S100P Protein S100-P

Match to Query 4919: 1414.706480 from(708.360516,2+)

Title: Elution from: 18.65 to 22.56 period: FD070412dMavril06.raw experiment: 1 cycles: 1 precIntensity: 214516.3 FinneganScanNumber: 1100

Data file D:\projecttemp\FD080412dM\FD070412dMavril06.msm

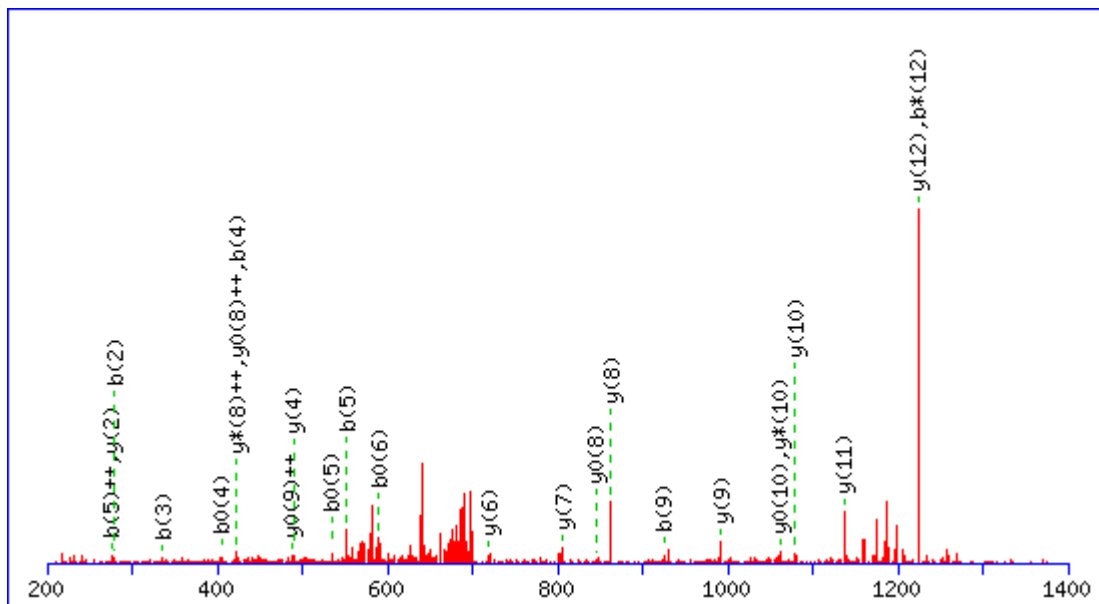

**Monoisotopic mass of neutral peptide Mr(calc):** 1413.698730

**Fixed modifications:** Carbamidomethyl (C)

**Variable modifications:**

**N-term :** Dimethyl (N-term)

**K13 :** Dimethyl (K)

**Ions Score:** 39 **Expect:** 0.03

**Matches (Bold Red):** 25/124 fragment ions using 64 most intense peaks

| #  | b                 | b <sup>++</sup>   | b*                 | b <sup>*++</sup> | b <sup>0</sup>    | b <sup>0++</sup> | Seq. | y                  | y <sup>++</sup> | y*                 | y <sup>*++</sup>  | y <sup>0</sup>     | y <sup>0++</sup>  | #  |
|----|-------------------|-------------------|--------------------|------------------|-------------------|------------------|------|--------------------|-----------------|--------------------|-------------------|--------------------|-------------------|----|
| 1  | 192.101901        | 96.554588         |                    |                  |                   |                  | Y    |                    |                 |                    |                   |                    |                   | 13 |
| 2  | <b>279.133929</b> | 140.070602        |                    |                  | 261.123364        | 131.065320       | S    | <b>1223.611384</b> | 612.309330      | 1206.584835        | 603.796056        | 1205.600819        | 603.304048        | 12 |
| 3  | <b>336.155393</b> | 168.581334        |                    |                  | 318.144828        | 159.576052       | G    | <b>1136.579356</b> | 568.793316      | 1119.552807        | 560.280042        | 1118.568791        | 559.788034        | 11 |
| 4  | <b>423.187421</b> | 212.097349        |                    |                  | <b>405.176856</b> | 203.092066       | S    | <b>1079.557892</b> | 540.282584      | <b>1062.531343</b> | 531.769310        | <b>1061.547327</b> | 531.277302        | 10 |
| 5  | <b>552.230014</b> | <b>276.618645</b> |                    |                  | <b>534.219449</b> | 267.613363       | E    | <b>992.525864</b>  | 496.766570      | 975.499315         | 488.253296        | 974.515299         | <b>487.761288</b> | 9  |
| 6  | 609.251478        | 305.129377        |                    |                  | <b>591.240913</b> | 296.124095       | G    | <b>863.483271</b>  | 432.245274      | 846.456722         | <b>423.731999</b> | <b>845.472706</b>  | <b>423.239991</b> | 8  |
| 7  | 696.283506        | 348.645391        |                    |                  | 678.272941        | 339.640109       | S    | <b>806.461807</b>  | 403.734542      | 789.435258         | 395.221267        | 788.451242         | 394.729259        | 7  |
| 8  | 797.331185        | 399.169231        |                    |                  | 779.320620        | 390.163948       | T    | <b>719.429779</b>  | 360.218528      | 702.403230         | 351.705253        | 701.419214         | 351.213245        | 6  |
| 9  | <b>925.389763</b> | 463.198520        | 908.363214         | 454.685245       | 907.379198        | 454.193237       | Q    | 618.382100         | 309.694688      | 601.355551         | 301.181414        | 600.371535         | 300.689406        | 5  |
| 10 | 1026.437442       | 513.722359        | 1009.410893        | 505.209085       | 1008.426877       | 504.717077       | T    | <b>490.323522</b>  | 245.665399      | 473.296973         | 237.152125        | 472.312957         | 236.660117        | 4  |
| 11 | 1139.521506       | 570.264391        | 1122.494957        | 561.751117       | 1121.510941       | 561.259109       | L    | 389.275843         | 195.141560      | 372.249294         | 186.628285        | 371.265278         | 186.136277        | 3  |
| 12 | 1240.569185       | 620.788231        | <b>1223.542636</b> | 612.274956       | 1222.558620       | 611.782948       | T    | <b>276.191779</b>  | 138.599528      | 259.165230         | 130.086253        | 258.181214         | 129.594245        | 2  |
| 13 |                   |                   |                    |                  |                   |                  | K    | 175.144100         | 88.075688       | 158.117551         | 79.562414         |                    |                   | 1  |

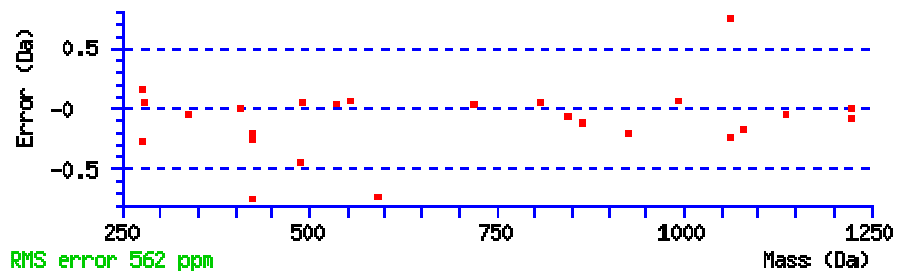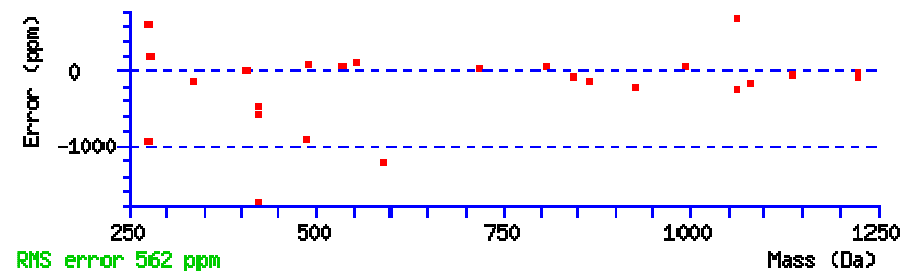

All matches to this query

| Score | Mr(cal):    | Delta    | Sequence                       |
|-------|-------------|----------|--------------------------------|
| 39.5  | 1413.698730 | 1.007750 | <a href="#">YSGSEGSTQTLTK</a>  |
| 8.5   | 1413.699585 | 1.006895 | <a href="#">SCMEGKSFLQK</a>    |
| 7.7   | 1413.709946 | 0.996534 | <a href="#">PEEPTKDATS GAR</a> |
| 6.7   | 1413.711334 | 0.995146 | <a href="#">HVVDHHVTSIDR</a>   |
| 5.0   | 1413.692200 | 1.014280 | <a href="#">KLNGMGDDGSPPAK</a> |
| 5.0   | 1413.692200 | 1.014280 | <a href="#">KLNGMGDDGSPPAK</a> |

|     |             |          |                                 |
|-----|-------------|----------|---------------------------------|
| 4.3 | 1413.710815 | 0.995665 | <a href="#">YSGILMKDRCK</a>     |
| 3.4 | 1413.703430 | 1.003050 | <a href="#">SQMSREFSTKNK</a>    |
| 2.8 | 1413.689697 | 1.016783 | <a href="#">YARVPCGFAAMK</a>    |
| 1.7 | 1414.693970 | 0.012510 | <a href="#">EASSAPSATSPTPGK</a> |

MS/MS Fragmentation of **YVANMHGDET**VGR

Found in **IPI00026270.1**, Tax\_Id=9606 Gene\_Symbol=CPM Carboxypeptidase M

Match to Query 5106: 1475.684979 from(492.902269,3+)

Title: Elution from: 19.37 to 23.27 period: FD070412dMavril04.raw experiment: 1 cycles: 1 precIntensity: 405863.6 FinneganScanNumber: 1179

Data file D:\projecttemp\FD080412dM\FD070412dMavril04.msm

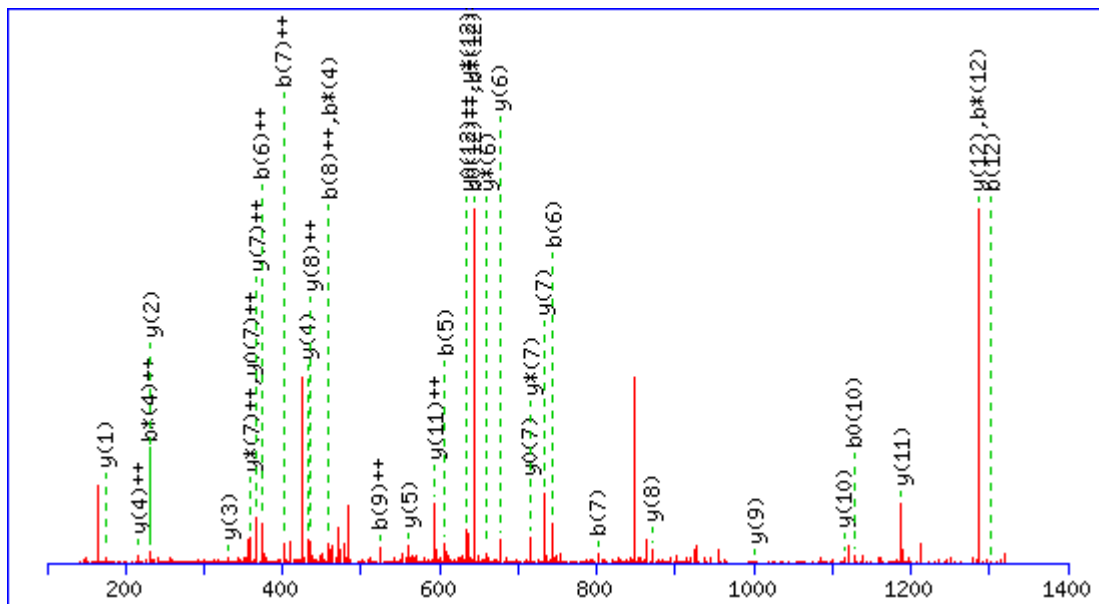

**Monoisotopic mass of neutral peptide Mr(calc):** 1475.682709

**Fixed modifications:** Carbamidomethyl (C)

**Variable modifications:**

**N-term :** Dimethyl (N-term)

**Ions Score:** 39 **Expect:** 0.017

**Matches (Bold Red):** 38/118 fragment ions using 109 most intense peaks

| #  | b           | b <sup>++</sup> | b*          | b <sup>*++</sup> | b <sup>0</sup> | b <sup>0++</sup> | Seq. | y           | y <sup>++</sup> | y*          | y <sup>*++</sup> | y <sup>0</sup> | y <sup>0++</sup> | #  |
|----|-------------|-----------------|-------------|------------------|----------------|------------------|------|-------------|-----------------|-------------|------------------|----------------|------------------|----|
| 1  | 192.101901  | 96.554588       |             |                  |                |                  | Y    |             |                 |             |                  |                |                  | 13 |
| 2  | 291.170315  | 146.088796      |             |                  |                |                  | V    | 1285.595361 | 643.301318      | 1268.568812 | 634.788044       | 1267.584796    | 634.296036       | 12 |
| 3  | 362.207429  | 181.607352      |             |                  |                |                  | A    | 1186.526947 | 593.767112      | 1169.500398 | 585.253837       | 1168.516382    | 584.761829       | 11 |
| 4  | 476.250356  | 238.628816      | 459.223807  | 230.115542       |                |                  | N    | 1115.489833 | 558.248554      | 1098.463284 | 549.735280       | 1097.479268    | 549.243272       | 10 |
| 5  | 607.290841  | 304.149059      | 590.264292  | 295.635784       |                |                  | M    | 1001.446906 | 501.227091      | 984.420357  | 492.713816       | 983.436341     | 492.221808       | 9  |
| 6  | 744.349753  | 372.678515      | 727.323204  | 364.165240       |                |                  | H    | 870.406421  | 435.706848      | 853.379872  | 427.193574       | 852.395856     | 426.701566       | 8  |
| 7  | 801.371217  | 401.189247      | 784.344668  | 392.675972       |                |                  | G    | 733.347509  | 367.177392      | 716.320960  | 358.664118       | 715.336944     | 358.172110       | 7  |
| 8  | 916.398160  | 458.702718      | 899.371611  | 450.189444       | 898.387595     | 449.697436       | D    | 676.326045  | 338.666660      | 659.299496  | 330.153386       | 658.315480     | 329.661378       | 6  |
| 9  | 1045.440753 | 523.224015      | 1028.414204 | 514.710740       | 1027.430188    | 514.218732       | E    | 561.299102  | 281.153189      | 544.272553  | 272.639914       | 543.288537     | 272.147906       | 5  |
| 10 | 1146.488432 | 573.747854      | 1129.461883 | 565.234580       | 1128.477867    | 564.742572       | T    | 432.256509  | 216.631892      | 415.229960  | 208.118618       | 414.245944     | 207.626610       | 4  |
| 11 | 1245.556846 | 623.282061      | 1228.530297 | 614.768787       | 1227.546281    | 614.276779       | V    | 331.208830  | 166.108053      | 314.182281  | 157.594778       |                |                  | 3  |
| 12 | 1302.578310 | 651.792793      | 1285.551761 | 643.279519       | 1284.567745    | 642.787511       | G    | 232.140416  | 116.573846      | 215.113867  | 108.060571       |                |                  | 2  |
| 13 |             |                 |             |                  |                |                  | R    | 175.118952  | 88.063114       | 158.092403  | 79.549839        |                |                  | 1  |

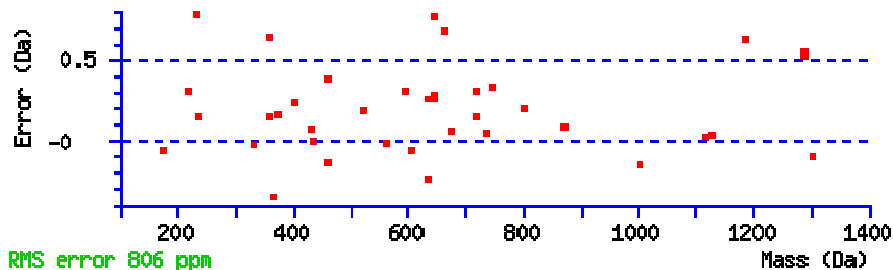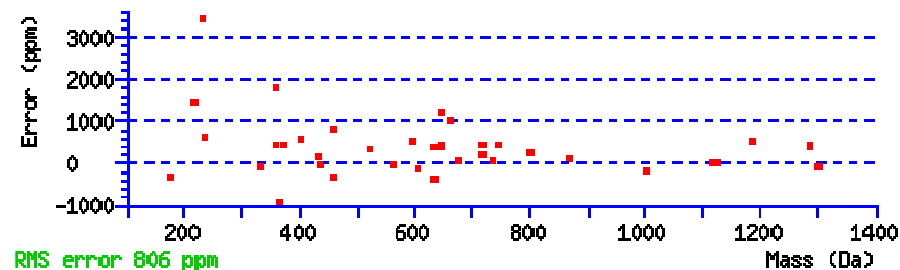

All matches to this query

| Score | Mr(cal):    | Delta     | Sequence                      |
|-------|-------------|-----------|-------------------------------|
| 39.2  | 1475.682709 | 0.002270  | <a href="#">YVANMHGDETVGR</a> |
| 11.4  | 1473.665695 | 2.019284  | <a href="#">PPKSPEEEGQMSS</a> |
| 7.2   | 1473.669952 | 2.015027  | <a href="#">CMMKSSDCVIK</a>   |
| 5.7   | 1475.692581 | -0.007602 | <a href="#">PNGSEIMVTNENK</a> |
| 4.7   | 1473.685699 | 1.999280  | <a href="#">CIMVTPDGNFHR</a>  |
| 3.2   | 1474.673080 | 1.011899  | <a href="#">ACPPVSMDCALR</a>  |

|     |             |           |                                |
|-----|-------------|-----------|--------------------------------|
| 2.7 | 1473.673584 | 2.011395  | <a href="#">EPTSPDGGEPGYIR</a> |
| 2.5 | 1474.679565 | 1.005414  | <a href="#">EEIMKAMTSGYR</a>   |
| 1.1 | 1473.681015 | 2.003964  | <a href="#">GMTTVDDFFQGTK</a>  |
| 0.9 | 1475.696426 | -0.011447 | <a href="#">RGKDTAEGTNEDR</a>  |

---



17 at the bottom of the SDS-gel (see main Materials and Methods). L under D0/D4 ratio means that only the light D0 peptides (+ insulin) were found for that protein. A \* beside the gene symbol indicates the 16 proteins that were identified in this screen, and also in the phosphopeptide analyses (supplementary tables 2 and 3). The proteins marked \* are also listed in Table 1 within the main text.

| band number | protein match number | accession   | gene symbol       | protein description                                                   | protein score | protein mass                         | protein coverage (%) | unique peptides | MSMS matches | quantified peptides | average ratio | deviation ratio |      |     |
|-------------|----------------------|-------------|-------------------|-----------------------------------------------------------------------|---------------|--------------------------------------|----------------------|-----------------|--------------|---------------------|---------------|-----------------|------|-----|
| 1           | 10                   | IP100176345 | UNC5A             | Isoform 3 of Netrin receptor UNC5A precursor                          | 35            | 90124                                | 1.1                  | 1               | 1            | 1                   | L             | 0.0             |      |     |
|             |                      | IP100418573 | UNC5A             | Isoform 2 of Netrin receptor UNC5A precursor                          | 35            | 34032                                | 1.1                  |                 |              |                     |               |                 |      |     |
|             |                      | IP100470692 | UNC5A             | Isoform 1 of Netrin receptor UNC5A precursor                          | 35            | 94439                                | 1.1                  |                 |              |                     |               |                 |      |     |
| 1           | 11                   | IP100174962 | MICAL1*           | Molecule interacting with Rab13                                       | 30            | 94352                                | 1                    | 1               | 1            | 1                   | L             | 0.0             |      |     |
| 2           | 33                   | IP100027481 | ABCB1             | Multidrug resistance protein 1                                        | 31            | 141772                               | 1.2                  | 2               | 3            | 1                   | L             | 0.0             |      |     |
|             |                      | IP100024804 | ATP2A1            | Isoform SERCA1B of Sarcolemmal/endoplasmic reticulum calcium ATPase 1 | 30            | 111550                               | 0.9                  | 1               | 1            | 1                   | L             | 0.0             |      |     |
| 2           | 36                   | IP100396118 | ATP2A1            | Isoform SERCA1A of Sarcolemmal/endoplasmic reticulum calcium ATPase 1 | 30            | 110582                               | 0.9                  |                 |              |                     |               |                 |      |     |
|             |                      | IP100646947 | ATP2A1            | 95 kDa protein                                                        | 30            | 96392                                | 1                    |                 |              |                     |               |                 |      |     |
|             |                      | IP100177817 | ATP2A2            | Isoform SERCA2A of Sarcolemmal/endoplasmic reticulum calcium ATPase 2 | 30            | 111103                               | 0.9                  |                 |              |                     |               |                 |      |     |
|             |                      | IP100219078 | ATP2A2            | Isoform SERCA2B of Sarcolemmal/endoplasmic reticulum calcium ATPase 2 | 30            | 116336                               | 0.9                  |                 |              |                     |               |                 |      |     |
|             |                      | IP100289649 | PTPN3             | Tyrosine-protein phosphatase non-receptor type 3                      | 29            | 105104                               | 0.9                  | 1               | 1            | 1                   | L             | 0.0             |      |     |
| 2           | 37                   | IP100647108 | PTPN3             | Tyrosine phosphatase                                                  | 29            | 96339                                | 1                    |                 |              |                     |               |                 |      |     |
| 4           | 33                   | IP100001723 | ATP10D            | Isoform 1 of Probable phospholipid-transporting ATPase VD             | 58            | 162156                               | 0.7                  | 1               | 1            | 1                   | L             | 0.0             |      |     |
| 4           | 39                   | IP100645951 | DPCR1             | diffuse panbronchiolitis critical region 1 protein                    | 40            | 25742                                | 6.8                  | 1               | 2            | 1                   | L             | 0.0             |      |     |
|             |                      | IP100142856 | DPCR1             | Hypothetical protein DKFz6660235                                      | 40            | 37616                                | 4.6                  |                 |              |                     |               |                 |      |     |
|             |                      | IP100643336 | DPCR1             | Diffuse panbronchiolitis critical region                              | 40            | 37615                                | 4.7                  |                 |              |                     |               |                 |      |     |
| 4           | 43                   | IP100295022 | NKTR              | NK-tumor recognition protein                                          | 36            | 166603                               | 0.6                  | 1               | 1            | 1                   | L             | 0.0             |      |     |
| 4           | 44                   | IP100009456 | NT5E              | 5--nucleotidase precursor                                             | 35            | 63898                                | 4.2                  | 2               | 2            | 2                   | L             | 0.0             |      |     |
|             |                      | IP100552302 | NT5E              | 5--nucleotidase, ecto                                                 | 35            | 34011                                | 4.6                  |                 |              |                     |               |                 |      |     |
|             |                      | IP100552444 | NT5E              | 5--nucleotidase, ecto                                                 | 35            | 29357                                | 9.3                  |                 |              |                     |               |                 |      |     |
| 4           | 48                   | IP100011197 | SNX25             | sorting nexin 25                                                      | 33            | 98625                                | 0.8                  | 1               | 1            | 1                   | L             | 0.0             |      |     |
|             |                      | IP100024706 | SNX25             | Hypothetical protein FLJ23161                                         | 33            | 42192                                | 0.8                  |                 |              |                     |               |                 |      |     |
| 4           | 50                   | IP100022086 | LRP2BP            | KIAA1325 protein (Fragment)                                           | 32            | 41107                                | 2.4                  | 1               | 2            | 1                   | L             | 0.0             |      |     |
|             |                      | IP100470656 | LRP2BP            | Hypothetical protein DKFz76100113                                     | 32            | 40369                                | 2.6                  |                 |              |                     |               |                 |      |     |
|             |                      | IP100744401 | LRP2BP            | LRP2 binding protein                                                  | 32            | 40154                                | 2.6                  |                 |              |                     |               |                 |      |     |
| 5           | 33                   | IP100220257 | TTL1              | Isoform 3 of Probable tubulin polyglutamylase                         | 35            | 44716                                | 1.8                  | 1               | 3            | 1                   | L             | 0.0             |      |     |
|             |                      | IP100302599 | TTL1              | Isoform A of Probable tubulin polyglutamylase                         | 35            | 49356                                | 1.7                  |                 |              |                     |               |                 |      |     |
|             |                      | IP100335572 | TTL1              | Isoform 4 of Probable tubulin polyglutamylase                         | 35            | 45749                                | 1.8                  |                 |              |                     |               |                 |      |     |
| 5           | 35                   | IP100398795 | RTN3              | reticulon 3 isoform b                                                 | 34            | 111211                               | 0.9                  | 1               | 1            | 1                   | L             | 0.0             |      |     |
|             |                      | IP100743293 | RTN3              | RTN3-A1                                                               | 34            | 113312                               | 0.9                  |                 |              |                     |               |                 |      |     |
| 5           | 36                   | IP100438855 | IL12RB2           | Isoform 1 of Interleukin-12 receptor beta-2 chain precursor           | 33            | 98499                                | 1                    | 1               | 3            | 1                   | L             | 0.0             |      |     |
|             |                      | IP100438856 | IL12RB2           | Isoform 2 of Interleukin-12 receptor beta-2 chain precursor           | 33            | 75700                                | 1.4                  |                 |              |                     |               |                 |      |     |
| 5           | 39                   | IP100479253 | IL12RB2           | Interleukin 12 receptor, beta 2                                       | 33            | 27114                                | 3.9                  |                 |              |                     |               |                 |      |     |
| 5           | 39                   | IP100030450 | PCNXL3            | PREDICTED: similar to pecanex-like 3 isoform 1                        | 30            | 202662                               | 0.5                  | 1               | 1            | 1                   | L             | 0.0             |      |     |
|             |                      | IP100738957 | PCNXL3            | PREDICTED: similar to pecanex-like 3 isoform 2                        | 30            | 210763                               | 0.5                  |                 |              |                     |               |                 |      |     |
|             |                      | IP100743749 | PCNXL3            | Hypothetical protein FLJ22427                                         | 30            | 93515                                | 1.1                  |                 |              |                     |               |                 |      |     |
|             |                      | IP100787937 | PCNXL3            | PREDICTED: similar to pecanex-like 3 isoform 5                        | 30            | 210791                               | 0.5                  |                 |              |                     |               |                 |      |     |
|             |                      | IP100760876 | PCNXL3            | 87 kDa protein                                                        | 30            | 87307                                | 1.1                  |                 |              |                     |               |                 |      |     |
| 6           | 21                   | IP100010214 | S100A14           | Protein S100-A14                                                      | 85            | 11826                                | 14.4                 | 1               | 1            | 1                   | L             | 0.0             |      |     |
| 6           | 34                   | IP100036554 | MLF1              | Myeloid leukemia factor 1                                             | 45            | 30665                                | 4.5                  | 1               | 2            | 1                   | L             | 0.0             |      |     |
|             |                      | IP100171189 | MLF1              | Myeloid leukemia factor 1                                             | 45            | 33981                                | 4                    |                 |              |                     |               |                 |      |     |
|             |                      | IP100719604 | MLF1              | Myeloid leukemia factor 1 variant 3                                   | 45            | 27665                                | 4.9                  |                 |              |                     |               |                 |      |     |
|             |                      | IP100744606 | MLF1              | Myeloid leukemia factor 1 variant 1                                   | 45            | 23102                                | 6                    |                 |              |                     |               |                 |      |     |
| 6           | 61                   | IP100472605 | HLA-A HLA-B HLA-C | HLA class I histocompatibility antigen, Cw-2 alpha chain precursor    | 31            | 41468                                | 2.2                  | 1               | 1            | 1                   | L             | 0.0             |      |     |
| 7           | 63                   | IP100171819 | FARP2             | Isoform 2 of FERM, RhoGEF and pleckstrin domain-containing protein 2  | 38            | 73622                                | 1.2                  | 1               | 1            | 1                   | L             | 0.0             |      |     |
|             |                      | IP100744221 | FARP2             | Isoform 1 of FERM, RhoGEF and pleckstrin domain-containing protein 2  | 38            | 120725                               | 0.8                  |                 |              |                     |               |                 |      |     |
| 7           | 64                   | IP100179757 | KIF1C             | Kinesin-like protein KIF1C                                            | 38            | 123906                               | 0.8                  | 1               | 2            | 1                   | L             | 0.0             |      |     |
| 7           | 66                   | IP100217439 | CDAN1             | Isoform 1 of Codann-1                                                 | 35            | 135509                               | 0.8                  | 1               | 6            | 1                   | L             | 0.0             |      |     |
|             |                      | IP100386747 | CDAN1             | Isoform 2 of Codann-1                                                 | 35            | 135561                               | 0.8                  |                 |              |                     |               |                 |      |     |
| 7           | 70                   | IP100029702 | PTK2B             | Isoform 1 of Protein tyrosine kinase 2 beta                           | 32            | 117112                               | 0.8                  | 1               | 2            | 1                   | L             | 0.0             |      |     |
|             |                      | IP100216435 | PTK2B             | Isoform 2 of Protein tyrosine kinase 2 beta                           | 32            | 112366                               | 0.8                  |                 |              |                     |               |                 |      |     |
|             |                      | IP100443767 | PTK2B             | Isoform 2 of Protein tyrosine kinase 2 beta                           | 32            | 68844                                | 1.3                  |                 |              |                     |               |                 |      |     |
| 7           | 71                   | IP100396154 | PHF20L1           | PHD finger protein 20-like 1 isoform 1                                | 32            | 116250                               | 1.5                  | 1               | 3            | 1                   | L             | 0.0             |      |     |
| 5           | 15                   | IP100299000 | PA2G4             | Proliferation-associated protein 2G4                                  | 127           | 43970                                | 9.9                  | 4               | 9            | 2                   | 111.3         | 46.2            |      |     |
| 3           | 11                   | IP100306239 | KATNB1            | Katanin p80 WD40-containing subunit B1                                | 45            | 73257                                | 1.2                  | 1               | 5            | 1                   | 58.7          | 0.0             |      |     |
|             |                      | IP100746256 | KATNB1            | Katanin p80 WD40-containing subunit B1                                | 45            | 73486                                | 1.2                  |                 |              |                     |               |                 |      |     |
| 7           | 32                   | IP100024911 | ERP29             | Endoplasmic reticulum protein Erp29 precursor                         | 149           | 29032                                | 9.6                  | 2               | 4            | 2                   | 40.2          | 20.4            |      |     |
| 6           | 47                   | IP100646294 | RPUSD3            | RNA pseudouridylylase synthase domain containing 3                    | 35            | 38779                                | 2.3                  | 1               | 1            | 1                   | 34.4          | 0.0             |      |     |
| 7           | 75                   | IP100449906 | ARHGGE7           | Isoform 1 of Rho guanine nucleotide exchange factor 7                 | 30            | 73664                                | 1.1                  | 1               | 1            | 1                   | 34.0          | 0.0             |      |     |
| 6           | 31                   | IP100219446 | PEBP1             | Phosphatidylethanolamine-binding protein 1                            | 51            | 21027                                | 4.8                  | 1               | 1            | 1                   | 30.1          | 0.0             |      |     |
| 5           | 38                   | IP100008522 | SCN10A            | Sodium channel protein type 10 subunit alpha                          | 31            | 222704                               | 0.4                  | 1               | 1            | 1                   | 27.5          | 0.0             |      |     |
|             |                      | IP100783779 | SCN10A            | 221 kDa protein                                                       | 31            | 222964                               | 0.4                  |                 |              |                     |               |                 |      |     |
| 7           | 57                   | IP100008522 | SCN10A            | Sodium channel protein type 10 subunit alpha                          | 43            | 222704                               | 0.8                  | 1               | 5            | 1                   | 27.5          | 0.0             |      |     |
|             |                      | IP100783779 | SCN10A            | 221 kDa protein                                                       | 43            | 222964                               | 0.7                  |                 |              |                     |               |                 |      |     |
| 5           | 30                   | IP100220834 | XRCC5             | ATP-dependent DNA helicase 2 subunit 2                                | 37            | 83091                                | 1                    | 1               | 1            | 1                   | 24.5          | 0.0             |      |     |
| 6           | 44                   | IP100166369 | FLJ33534          | CDNA FLJ33534 fis. clone BRAMY2007411                                 | 38            | 19352                                | 4                    | 1               | 1            | 1                   | 23.3          | 0.0             |      |     |
| 4           | 10                   | IP100465248 | ENO1              | enolase 1                                                             | 294           | 47481                                | 11.1                 | 5               | 10           | 3                   | 21.9          | 8.0             |      |     |
| 7           | 58                   | IP100556231 | LOC644936         | Hypothetical protein                                                  | 42            | 25129                                | 5                    | 1               | 1            | 1                   | 20.0          | 0.0             |      |     |
| 6           | 62                   | IP100166143 | SOX5              | Isoform 4 of Transcription factor SOX-5                               | 31            | 71171                                | 1.9                  | 1               | 2            | 1                   | 14.0          | 0.0             |      |     |
|             |                      | IP100171247 | SOX5              | Isoform 2 of Transcription factor SOX-5                               | 31            | 82630                                | 1.6                  |                 |              |                     |               |                 |      |     |
|             |                      | IP100216317 | SOX5              | Isoform 1 of Transcription factor SOX-5                               | 31            | 84201                                | 1.6                  |                 |              |                     |               |                 |      |     |
|             |                      | IP100218631 | SOX6              | Isoform 3 of Transcription factor SOX-6                               | 31            | 89993                                | 1.5                  |                 |              |                     |               |                 |      |     |
|             |                      | IP100395930 | SOX6              | Hypothetical protein SOX6 (Fragment)                                  | 31            | 92215                                | 1.4                  |                 |              |                     |               |                 |      |     |
|             |                      | IP100412928 | SOX6              | Isoform 2 of Transcription factor SOX-6                               | 31            | 87588                                | 1.5                  |                 |              |                     |               |                 |      |     |
|             |                      | IP100641980 | SOX6              | Isoform 1 of Transcription factor SOX-6                               | 31            | 92235                                | 1.4                  |                 |              |                     |               |                 |      |     |
|             |                      | IP100787755 | SOX6              | Hypothetical protein SOX6 (Fragment)                                  | 31            | 89675                                | 1.5                  |                 |              |                     |               |                 |      |     |
|             |                      | 2           | 27                | IP100220901                                                           | TBC1D4        | TBC1 domain family member 4          | 41                   | 148188          | 1.1          | 1                   | 1             | 1               | 12.9 | 0.0 |
|             |                      | 3           | 18                | IP100016759                                                           | SLC18A2       | Synaptic vesicular amine transporter | 32                   | 56246           | 2.3          | 1                   | 3             | 1               | 11.8 | 0.0 |
| 4           | 45                   | IP100013894 | STIP1             | Stress-induced-phosphoprotein 1                                       | 35            | 63227                                | 1.7                  | 1               | 1            | 1                   | 10.8          | 0.0             |      |     |
|             |                      | IP100479946 | STIP1             | STIP1 protein                                                         | 35            | 68687                                | 1.5                  |                 |              |                     |               |                 |      |     |
| 4           | 18                   | IP100216919 | YAP1*             | YAP1 protein                                                          | 148           | 54484                                | 7.1                  | 3               | 5            | 2                   | 10.6          | 2.6             |      |     |
| 6           | 52                   | IP100307155 | ROCK2             | Rho-associated protein kinase 2                                       | 33            | 161952                               | 0.5                  | 1               | 2            | 1                   | 10.1          | 0.0             |      |     |

| band number | protein match number | accession   | gene symbol     | protein description                                                         | protein score | protein mass | protein coverage (%) | unique peptides | MSMS matches | quantified peptides | average ratio | deviation ratio |
|-------------|----------------------|-------------|-----------------|-----------------------------------------------------------------------------|---------------|--------------|----------------------|-----------------|--------------|---------------------|---------------|-----------------|
| 7           | 23                   | IPI00306195 | AKT1S1*         | AKT1S1 protein                                                              | 308           | 29472        | 17                   | 4               | 13           | 2                   | 9.9           | 1.2             |
|             |                      | IPI00549786 | AKT1S1*         | AKT1S1 protein                                                              | 308           | 27595        | 18.4                 |                 |              |                     |               |                 |
| 6           | 41                   | IPI00025019 | PSMB1           | Proteasome subunit beta type 1                                              | 40            | 26700        | 3.7                  | 1               | 1            | 1                   | 9.7           | 0.0             |
| 4           | 52                   | IPI00102281 | ASPRV1          | Hypothetical protein FLJ25084                                               | 31            | 37139        | 2.9                  | 1               | 1            | 1                   | 9.3           | 0.0             |
| 2           | 17                   | IPI00291175 | VCL             | Isoform 1 of Vinculin                                                       | 81            | 117088       | 4                    | 3               | 4            | 2                   | 9.1           | 3.4             |
|             |                      | IPI00307162 | VCL             | vinculin isoform meta-VCL                                                   | 81            | 124292       | 3.8                  |                 |              |                     |               |                 |
| 2           | 24                   | IPI00464978 | IRS2*           | Insulin receptor substrate 2                                                | 52            | 138545       | 1.8                  | 1               | 3            | 2                   | 9.0           | 2.4             |
| 5           | 37                   | IPI00032316 | ZKSCAN5         | Zinc finger protein 95 homolog                                              | 33            | 98894        | 1                    | 1               | 1            | 1                   | 8.7           | 0.0             |
| 7           | 69                   | IPI00032137 | ACTN3           | Alpha-actinin-3                                                             | 33            | 103913       | 1.9                  | 1               | 2            | 1                   | 8.4           | 0.0             |
| 6           | 60                   | IPI00477550 | LOC644191       | PREDICTED: similar to 40S ribosomal protein S26 isoform 1                   | 32            | 13221        | 7.8                  | 1               | 2            | 1                   | 7.9           | 0.0             |
|             |                      | IPI00176696 | na              | PREDICTED: similar to 40S ribosomal protein S26                             | 32            | 13338        | 7.8                  |                 |              |                     |               |                 |
|             |                      | IPI00176854 | na              | Ribosomal protein S26                                                       | 32            | 13356        | 7.4                  |                 |              |                     |               |                 |
|             |                      | IPI00399281 | na              | 13 kDa protein                                                              | 32            | 13173        | 7.5                  |                 |              |                     |               |                 |
|             |                      | IPI00736949 | na              | PREDICTED: similar to 40S ribosomal protein S26                             | 32            | 13269        | 7.5                  |                 |              |                     |               |                 |
|             |                      | IPI00739263 | na              | PREDICTED: similar to 40S ribosomal protein S26                             | 32            | 11559        | 8.6                  |                 |              |                     |               |                 |
|             |                      | IPI00787644 | na              | PREDICTED: similar to 40S ribosomal protein S26                             | 32            | 13328        | 7.8                  |                 |              |                     |               |                 |
|             |                      | IPI00186712 | RPS26           | OTTHUMP0000018641                                                           | 32            | 13278        | 7.8                  |                 |              |                     |               |                 |
|             |                      | IPI00655650 | RPS26 LOC728937 | 40S ribosomal protein S26                                                   | 32            | 13161        | 7.8                  |                 |              |                     |               |                 |
|             |                      | IPI00401819 | RPS26L          | Hypothetical protein RPS26                                                  | 32            | 13319        | 7.8                  |                 |              |                     |               |                 |
|             |                      | IPI00187140 | RPS26L1         | Ribosomal protein S26-like 1                                                | 32            | 13336        | 7.8                  |                 |              |                     |               |                 |
| 7           | 21                   | IPI00003348 | GNB2            | Guanine nucleotide-binding protein G(I)/G(S)/G(T) subunit beta 2            | 440           | 37917        | 28.8                 | 9               | 20           | 3                   | 7.9           | 2.3             |
| 5           | 34                   | IPI00386119 | SFI             | Isoform 5 of Splicing factor 1                                              | 35            | 80666        | 1.4                  | 1               | 1            | 1                   | 7.9           | 0.0             |
| 6           | 29                   | IPI00026271 | RAC1            | Isoform A of Ras-related C3 botulinum toxin substrate 1 precursor           | 56            | 21835        | 9.9                  | 2               | 3            | 2                   | 7.5           | 1.9             |
|             |                      | IPI00219675 | RAC1            | Isoform B of Ras-related C3 botulinum toxin substrate 1 precursor           | 56            | 23851        | 9                    |                 |              |                     |               |                 |
|             |                      | IPI00010270 | RAC2            | Ras-related C3 botulinum toxin substrate 2 precursor                        | 56            | 21814        | 9.9                  |                 |              |                     |               |                 |
|             |                      | IPI00023138 | RAC3            | Ras-related C3 botulinum toxin substrate 3                                  | 56            | 21764        | 9.9                  |                 |              |                     |               |                 |
| 4           | 17                   | IPI00006634 | CCDC6*          | Coiled-coil domain-containing protein 6                                     | 160           | 66274        | 11.6                 | 6               | 11           | 3                   | 7.1           | 2.7             |
| 7           | 68                   | IPI00178743 | ALMS1           | ALMS1                                                                       | 33            | 46304        | 0.2                  | 1               | 1            | 1                   | 7.1           | 0.0             |
|             |                      | IPI00740123 | ALMS1           | Isoform 2 of Alstrom syndrome protein 1                                     | 33            | 457161       | 0.2                  |                 |              |                     |               |                 |
|             |                      | IPI00740909 | ALMS1           | Isoform 3 of Alstrom syndrome protein 1                                     | 33            | 427044       | 0.3                  |                 |              |                     |               |                 |
| 4           | 32                   | IPI00019906 | BSG             | Isoform 2 of Basigin precursor                                              | 62            | 29431        | 7.1                  | 2               | 3            | 2                   | 6.9           | 0.9             |
|             |                      | IPI00218019 | BSG             | Isoform 1 of Basigin precursor                                              | 62            | 42573        | 4.9                  |                 |              |                     |               |                 |
|             |                      | IPI00394876 | BSG             | basigin isoform 3                                                           | 62            | 19540        | 10.8                 |                 |              |                     |               |                 |
|             |                      | IPI00394877 | BSG             | basigin isoform 4                                                           | 62            | 22921        | 9.3                  |                 |              |                     |               |                 |
| 1           | 7                    | IPI00301263 | CAD*            | CAD protein                                                                 | 78            | 245167       | 0.5                  | 1               | 3            | 1                   | 6.7           | 0.0             |
| 2           | 1                    | IPI00420004 | MYO1G           | myosin IG                                                                   | 1971          | 117393       | 20.2                 | 19              | 82           | 13                  | 6.7           | 2.2             |
| 4           | 35                   | IPI00026516 | GNAO1           | Succinyl-CoA:3-ketoacid-coenzyme A transferase 1, mitochondrial precursor   | 45            | 56578        | 2.7                  | 1               | 1            | 1                   | 6.5           | 0.0             |
| 7           | 13                   | IPI00217906 | GNAI2           | Isoform 2 of Guanine nucleotide-binding protein G(i), alpha-2 subunit       | 858           | 39075        | 31.3                 | 8               | 28           | 2                   | 6.4           | 0.4             |
|             |                      | IPI00748145 | GNAI2           | guanine nucleotide binding protein, alpha inhibiting activity polypeptide 2 | 858           | 40995        | 29.9                 |                 |              |                     |               |                 |
| 2           | 30                   | IPI00646294 | RPLSD3          | RNA pseudouridylyl synthase domain containing 3                             | 36            | 38779        | 2.3                  | 1               | 1            | 1                   | 6.3           | 0.0             |
| 6           | 55                   | IPI00290456 | ICAM5           | Intercellular adhesion molecule 5 precursor                                 | 33            | 98980        | 1.3                  | 1               | 4            | 1                   | 6.3           | 0.0             |
|             |                      | IPI00743302 | ICAM5           | intercellular adhesion molecule 5 precursor                                 | 33            | 98766        | 1.3                  |                 |              |                     |               |                 |
| 7           | 47                   | IPI00418262 | ALDOC           | Fructose-bisphosphate aldolase C                                            | 64            | 39699        | 9.9                  | 3               | 4            | 2                   | 6.2           | 1.7             |
| 1           | 8                    | IPI00291607 | ITPR3           | Inositol 1,4,5-trisphosphate receptor type 3                                | 45            | 306752       | 1.7                  | 1               | 4            | 2                   | 6.2           | 3.3             |
| 4           | 1                    | IPI00305589 | PFKFB2*         | Isoform 1 of 6-phosphofructo-2-kinase/fructose-2,6-bisphosphatase 2         | 958           | 58953        | 41.4                 | 23              | 64           | 4                   | 6.2           | 0.9             |
| 7           | 55                   | IPI00022891 | SLC25A4         | ADP/ATP translocase 1                                                       | 47            | 33140        | 2.7                  | 1               | 1            | 1                   | 6.2           | 0.0             |
|             |                      | IPI00007188 | SLC25A5         | ADP/ATP translocase 2                                                       | 47            | 32971        | 2.7                  |                 |              |                     |               |                 |
|             |                      | IPI00291467 | SLC25A6         | ADP/ATP translocase 3                                                       | 47            | 32942        | 2.7                  |                 |              |                     |               |                 |
| 2           | 23                   | IPI00217561 | ITGB1           | Isoform Beta-1C of Integrin beta-1 precursor                                | 57            | 95031        | 1.3                  | 1               | 2            | 1                   | 6.1           | 0.0             |
|             |                      | IPI00217562 | ITGB1           | Isoform Beta-1C-2 of Integrin beta-1 precursor                              | 57            | 94446        | 1.3                  |                 |              |                     |               |                 |
|             |                      | IPI00217563 | ITGB1           | Isoform Beta-1A of Integrin beta-1 precursor                                | 57            | 91714        | 1.4                  |                 |              |                     |               |                 |
|             |                      | IPI00293305 | ITGB1           | Isoform Beta-1B of Integrin beta-1 precursor                                | 57            | 90746        | 1.4                  |                 |              |                     |               |                 |
|             |                      | IPI00549336 | ITGB1           | Isoform Beta-1D of Integrin beta-1 precursor                                | 57            | 92183        | 1.4                  |                 |              |                     |               |                 |
|             |                      | IPI00645194 | ITGB1           | integrin beta 1 isoform 1A precursor                                        | 57            | 91664        | 1.4                  |                 |              |                     |               |                 |
| 2           | 26                   | IPI00010418 | MYO1C           | Myosin Ic                                                                   | 45            | 118763       | 1.5                  | 2               | 3            | 1                   | 6.1           | 1.3             |
| 7           | 56                   | IPI00024650 | SLC16A1         | Monocarboxylate transporter 1                                               | 45            | 54607        | 2.4                  | 1               | 1            | 1                   | 5.8           | 0.0             |
|             |                      | IPI00643709 | SLC16A1         | Solute carrier family 16                                                    | 45            | 32068        | 4.1                  |                 |              |                     |               |                 |
|             |                      | IPI00646589 | SLC16A1         | Solute carrier family 16                                                    | 45            | 49871        | 2.6                  |                 |              |                     |               |                 |
| 6           | 14                   | IPI00419585 | PPIA            | Peptidyl-prolyl cis-trans isomerase A                                       | 155           | 18098        | 17                   | 3               | 11           | 3                   | 5.6           | 2.0             |
|             |                      | IPI00472718 | PPIA            | Peptidyl-prolyl isomerase A                                                 | 155           | 11582        | 17.1                 |                 |              |                     |               |                 |
| 7           | 38                   | IPI00022624 | GPRC5A          | Retinoic acid-induced protein 3                                             | 117           | 40624        | 5.3                  | 2               | 3            | 1                   | 5.6           | 0.0             |
| 7           | 49                   | IPI00011253 | RPS3            | 40S ribosomal protein S3                                                    | 54            | 26842        | 4.9                  | 1               | 1            | 1                   | 5.5           | 0.0             |
| 5           | 28                   | IPI00027223 | IDH1            | Isoform 1 of Isocitrate dehydrogenase [NADP] cytoplasmic                    | 41            | 46915        | 3.1                  | 1               | 1            | 1                   | 5.5           | 0.0             |
| 4           | 15                   | IPI00180675 | TUBA1A          | Tubulin alpha-3 chain                                                       | 168           | 50788        | 13.1                 | 6               | 16           | 2                   | 5.4           | 1.2             |
|             |                      | IPI00387144 | TUBA1B          | Tubulin alpha-ubiquitous chain                                              | 168           | 50804        | 13.1                 |                 |              |                     |               |                 |
|             |                      | IPI00218343 | TUBA1C          | Tubulin alpha-6 chain                                                       | 168           | 50548        | 13.1                 |                 |              |                     |               |                 |
|             |                      | IPI00478908 | TUBA1C          | 50 kDa protein                                                              | 168           | 50417        | 23                   |                 |              |                     |               |                 |
| 3           | 17                   | IPI00019088 | COL9A2          | Collagen alpha-2(IX) chain precursor                                        | 32            | 65319        | 1.3                  | 1               | 1            | 1                   | 5.4           | 0.0             |
|             |                      | IPI00647776 | COL9A2          | Collagen, type IX, alpha 2                                                  | 32            | 7808         | 10.8                 |                 |              |                     |               |                 |
| 4           | 13                   | IPI00440493 | ATP5A1          | ATP synthase subunit alpha, mitochondrial precursor                         | 248           | 59828        | 6.3                  | 3               | 6            | 2                   | 5.4           | 1.1             |
|             |                      | IPI00471928 | ATP5A1          | 18 kDa protein                                                              | 248           | 17690        | 21                   |                 |              |                     |               |                 |
|             |                      | IPI00549805 | ATP5A1          | 23 kDa protein                                                              | 248           | 22943        | 16.1                 |                 |              |                     |               |                 |
| 2           | 19                   | IPI00013744 | ITGA2           | Integrin alpha-2 precursor                                                  | 61            | 130468       | 1.9                  | 2               | 4            | 2                   | 5.4           | 0.2             |
| 1           | 3                    | IPI00019502 | MYH9            | Myosin-9                                                                    | 538           | 227515       | 4.4                  | 7               | 21           | 3                   | 5.2           | 1.4             |
| 6           | 33                   | IPI00062120 | S100A16         | Protein S100-A16                                                            | 48            | 11851        | 11.7                 | 1               | 2            | 1                   | 5.2           | 0.0             |
| 5           | 24                   | IPI00027107 | TUFM            | Tu translation elongation factor, mitochondrial                             | 65            | 50185        | 4.8                  | 2               | 2            | 2                   | 5.2           | 1.2             |
| 6           | 35                   | IPI00013296 | RPS18           | 40S ribosomal protein S18                                                   | 44            | 17577        | 5.9                  | 1               | 1            | 1                   | 5.1           | 0.0             |
|             |                      | IPI00642513 | RPS18           | PREDICTED: similar to ribosomal protein S18                                 | 44            | 17654        | 5.9                  |                 |              |                     |               |                 |
| 3           | 14                   | IPI00025417 | ZNF45           | Zinc finger protein 45                                                      | 34            | 80475        | 1.5                  | 1               | 2            | 1                   | 5.0           | 0.0             |
|             |                      | IPI00444117 | ZNF45           | Zinc finger protein 45                                                      | 34            | 62837        | 1.9                  |                 |              |                     |               |                 |
| 4           | 40                   | IPI00018009 | EDC3            | Enhancer of mRNA decapping protein 3                                        | 39            | 56784        | 5.3                  | 3               | 3            | 2                   | 4.8           | 0.2             |
| 7           | 54                   | IPI00218200 | BCAP31          | B-cell receptor-associated protein 31                                       | 48            | 34901        | 2.9                  | 1               | 1            | 1                   | 4.8           | 0.0             |
|             |                      | IPI00787597 | na              | PREDICTED: similar to B-cell receptor-associated protein 31                 | 48            | 19545        | 5.1                  |                 |              |                     |               |                 |
| 7           | 24                   | IPI00641950 | GNB2L1          | Lung cancer oncogene 7                                                      | 277           | 38378        | 8.1                  | 2               | 6            | 1                   | 4.7           | 0.0             |

| band number | protein match number | accession   | gene symbol | protein description                                                   | protein score | protein mass | protein coverage (%) | unique peptides | MSMS matches | quantified peptides | average ratio | deviation ratio |
|-------------|----------------------|-------------|-------------|-----------------------------------------------------------------------|---------------|--------------|----------------------|-----------------|--------------|---------------------|---------------|-----------------|
| 6           | 18                   | IP100784408 | GNB2L1      | Proliferation-inducing gene 21                                        | 277           | 30237        | 10.3                 |                 |              |                     |               |                 |
|             |                      | IP100013917 | RPS12       | 40S ribosomal protein S12                                             | 96            | 14728        | 7.6                  | 1               | 5            | 1                   | 4.7           | 0.0             |
|             |                      | IP100456898 | RPS12       | PREDICTED: similar to ribosomal protein S12                           | 96            | 14931        | 7.4                  |                 |              |                     |               |                 |
|             |                      | IP100514100 | RPS12       | Ribosomal protein S12                                                 | 96            | 8640         | 12.7                 |                 |              |                     |               |                 |
| 6           | 51                   | IP100017448 | RPS21       | 40S ribosomal protein S21                                             | 33            | 9220         | 10.8                 | 1               | 2            | 1                   | 4.6           | 0.0             |
|             |                      | IP100387084 | RPS21       | OTTHUMP0000031487                                                     | 33            | 10116        | 10                   |                 |              |                     |               |                 |
| 5           | 3                    | IP100396485 | EEF1A1      | Elongation factor 1-alpha 1                                           | 533           | 50451        | 19.3                 | 9               | 34           | 3                   | 4.6           | 1.3             |
|             |                      | IP100472724 | EEF1A1.3    | Eukaryotic translation elongation factor 1 alpha-like 3               | 533           | 50495        | 19.3                 |                 |              |                     |               |                 |
| 1           | 12                   | IP100442351 | TBC1D10A    | FLJ00288 protein (Fragment)                                           | 30            | 24641        | 4.6                  | 1               | 1            | 1                   | 4.5           | 0.0             |
|             | 72                   | IP100026154 | PRKCSH      | Glycosidase 2 subunit beta precursor                                  | 31            | 60228        | 1.9                  | 1               | 1            | 1                   | 4.5           | 0.0             |
| 7           | 72                   | IP100419384 | PRKCSH      | protein kinase C substrate 80K-H isoform 1                            | 31            | 60357        | 1.8                  |                 |              |                     |               |                 |
|             | 49                   | IP100738685 | LOC654350   | PREDICTED: similar to ribosomal protein L9                            | 35            | 23526        | 3                    | 1               | 1            | 1                   | 4.4           | 0.0             |
| 4           | 51                   | IP100719047 | na          | Hypothetical protein                                                  | 35            | 21861        | 3.6                  |                 |              |                     |               |                 |
|             |                      | IP100031691 | RPL9        | 60S ribosomal protein L9                                              | 35            | 21964        | 3.6                  |                 |              |                     |               |                 |
| 7           | 26                   | IP100297656 | CNGB1       | cyclic nucleotide gated channel beta 1                                | 31            | 140502       | 0.8                  | 1               | 1            | 1                   | 4.4           | 0.0             |
|             |                      | IP100646195 | CNGB1       | Rod photoreceptor CNG-channel beta subunit                            | 31            | 140004       | 0.8                  |                 |              |                     |               |                 |
| 6           | 7                    | IP100291005 | MDH1        | Malate dehydrogenase, cytoplasmic                                     | 255           | 36500        | 15                   | 4               | 7            | 2                   | 4.4           | 0.2             |
|             |                      | IP100477279 | LOC646875   | PREDICTED: similar to 60S ribosomal protein L12                       | 236           | 44230        | 4                    | 1               | 3            | 1                   | 4.4           | 0.0             |
| 6           | 57                   | IP100026621 | na          | 18 kDa protein                                                        | 236           | 18003        | 9.8                  |                 |              |                     |               |                 |
|             |                      | IP100746242 | na          | 14 kDa protein                                                        | 236           | 14503        | 12.1                 |                 |              |                     |               |                 |
|             |                      | IP100024933 | RPL12       | 60S ribosomal protein L12                                             | 236           | 17979        | 9.7                  |                 |              |                     |               |                 |
|             |                      | IP100455040 | RPL12       | RPL12 protein                                                         | 236           | 14519        | 12.1                 |                 |              |                     |               |                 |
|             |                      | IP100478310 | RPL12       | PREDICTED: similar to 60S ribosomal protein L12                       | 236           | 31076        | 5.7                  |                 |              |                     |               |                 |
|             |                      | IP100479158 | RPL12       | Ribosomal protein L12 variant                                         | 236           | 24936        | 7.1                  |                 |              |                     |               |                 |
|             |                      | IP100735546 | LOC651324   | PREDICTED: similar to RAB1, member RAS oncogene family                | 33            | 12219        | 7.3                  | 1               | 1            | 1                   | 4.4           | 0.0             |
|             |                      | IP100005719 | RAB1A       | RAB1A, member RAS oncogene family                                     | 33            | 22891        | 3.9                  |                 |              |                     |               |                 |
|             |                      | IP100008964 | RAB1B       | Ras-related protein Rab-1B                                            | 33            | 22328        | 4                    |                 |              |                     |               |                 |
|             |                      | IP100022134 | RAB1B       | Putative small GTP-binding protein                                    | 33            | 18705        | 4.9                  |                 |              |                     |               |                 |
| 5           | 26                   | IP100550021 | RPL3        | 60S ribosomal protein L3                                              | 47            | 46234        | 2                    | 1               | 2            | 1                   | 4.3           | 0.0             |
|             |                      | IP100651660 | RPL3        | ribosomal protein L3 isoform b                                        | 47            | 40298        | 2.3                  |                 |              |                     |               |                 |
| 7           | 53                   | IP100069693 | na          | Similar to ribosomal protein L14                                      | 49            | 23500        | 5.1                  | 1               | 2            | 1                   | 4.3           | 0.0             |
|             |                      | IP100739139 | na          | PREDICTED: similar to 60S ribosomal protein L14 (CAG-ISL 7) isoform 1 | 49            | 23358        | 5.2                  |                 |              |                     |               |                 |
|             |                      | IP100745587 | na          | 16 kDa protein                                                        | 49            | 16511        | 7.3                  |                 |              |                     |               |                 |
|             |                      | IP100002821 | RPL14       | 60S ribosomal protein L14                                             | 49            | 23258        | 5.2                  |                 |              |                     |               |                 |
| 6           | 22                   | IP100555744 | RPL14       | RPL14 protein                                                         | 49            | 23886        | 5                    |                 |              |                     |               |                 |
|             |                      | IP100030362 | PLP2        | Proteolipid protein 2                                                 | 84            | 17022        | 8.6                  | 1               | 3            | 1                   | 4.3           | 0.0             |
| 4           | 19                   | IP100083751 | na          | CALRETIICULIN=CALCIUM binding protein (Fragment)                      | 148           | 24338        | 12.6                 | 3               | 7            | 1                   | 4.3           | 0.0             |
|             | 40                   | IP100046304 | PP1B        | peptidylhydrol isomerase B precursor                                  | 41            | 23785        | 6.9                  | 2               | 5            | 2                   | 4.3           | 1.4             |
| 7           | 45                   | IP100022977 | CKB         | Creatine kinase B-type                                                | 76            | 42902        | 7.1                  | 2               | 3            | 2                   | 4.2           | 0.9             |
|             | 34                   | IP100220465 | LIMA1       | Isoform Alpha of LIM domain and actin-binding protein 1               | 31            | 67534        | 5.8                  | 3               | 3            | 2                   | 4.2           | 1.3             |
| 2           | 34                   | IP100220466 | LIMA1       | Isoform 3 of LIM domain and actin-binding protein 1                   | 31            | 51586        | 7.7                  |                 |              |                     |               |                 |
|             |                      | IP100008918 | LIMA1       | Isoform Beta of LIM domain and actin-binding protein 1                | 31            | 85630        | 4.6                  |                 |              |                     |               |                 |
|             |                      | IP100554786 | TXNRD1      | Thioredoxin reductase 1, cytoplasmic precursor                        | 54            | 55470        | 2.2                  | 1               | 2            | 1                   | 4.2           | 0.0             |
| 4           | 34                   | IP100743646 | TXNRD1      | Thioredoxin reductase                                                 | 54            | 65159        | 1.9                  |                 |              |                     |               |                 |
|             |                      | IP100783641 | TXNRD1      | KM-102-derived reductase-like factor                                  | 54            | 72077        | 1.8                  |                 |              |                     |               |                 |
| 6           | 1                    | IP100219219 | LGALS1      | Galectin-1                                                            | 466           | 14917        | 20                   | 2               | 15           | 2                   | 4.2           | 1.3             |
|             | 22                   | IP100180128 | BZW1        | basic leucine zipper and W2 domains 1                                 | 82            | 40627        | 2.8                  | 1               | 2            | 1                   | 4.2           | 0.0             |
| 5           | 22                   | IP100785096 | BZW1        | PREDICTED: similar to basic leucine zipper and W2 domains 1           | 82            | 51420        | 2.2                  |                 |              |                     |               |                 |
|             |                      | IP100787155 | BZW1L1      | PREDICTED: similar to basic leucine zipper and W2 domains 1           | 82            | 31979        | 3.6                  |                 |              |                     |               |                 |
|             |                      | IP100005681 | na          | PREDICTED: similar to basic leucine zipper and W2 domains 1           | 82            | 32411        | 3.4                  |                 |              |                     |               |                 |
|             |                      | IP100163187 | FSCN1       | Fascin                                                                | 128           | 54992        | 10.1                 | 4               | 9            | 2                   | 4.2           | 1.0             |
| 4           | 23                   | IP100747810 | FSCN1       | FSCN1 protein                                                         | 128           | 55233        | 10                   |                 |              |                     |               |                 |
|             | 12                   | IP100022744 | CSE1L       | Isoform 1 of Exportin-2                                               | 224           | 111145       | 2.5                  | 2               | 4            | 1                   | 4.1           | 0.0             |
| 7           | 48                   | IP100219994 | CSE1L       | Isoform 3 of Exportin-2                                               | 224           | 108507       | 2.5                  |                 |              |                     |               |                 |
|             |                      | IP100023048 | EEF1D       | Elongation factor 1-delta                                             | 60            | 31086        | 8.9                  | 2               | 3            | 2                   | 4.1           | 1.2             |
| 4           | 8                    | IP100064086 | EEF1D       | EEF1D protein                                                         | 60            | 28654        | 9.7                  |                 |              |                     |               |                 |
|             |                      | IP100642971 | EEF1D       | eukaryotic translation elongation factor 1 delta isoform 1            | 60            | 71820        | 3.9                  |                 |              |                     |               |                 |
|             |                      | IP100100137 | na          | Elongation factor 1-delta (EF-1-delta) (Antigen NY-CO-4) isoform      | 60            | 31281        | 8.8                  |                 |              |                     |               |                 |
|             |                      | IP100220644 | PKM2        | Isoform M1 of Pyruvate kinase isozymes M1/M2                          | 364           | 58407        | 11.7                 | 6               | 15           | 3                   | 4.1           | 2.0             |
| 7           | 40                   | IP100479186 | PKM2        | pyruvate kinase 3 isoform 1                                           | 364           | 58470        | 10.2                 |                 |              |                     |               |                 |
|             |                      | IP100783061 | PKM2        | 58 kDa protein                                                        | 364           | 58542        | 11.6                 |                 |              |                     |               |                 |
|             |                      | IP100784179 | PKM2        | 58 kDa protein                                                        | 364           | 58474        | 11.7                 |                 |              |                     |               |                 |
|             |                      | IP100001734 | PSAT1       | Isoform 1 of Phosphoserine aminotransferase                           | 102           | 40796        | 9.9                  | 4               | 7            | 4                   | 4.1           | 1.5             |
| 7           | 22                   | IP100219478 | PSAT1       | Isoform 2 of Phosphoserine aminotransferase                           | 102           | 35508        | 12.7                 |                 |              |                     |               |                 |
|             |                      | IP100337418 | GNAI1       | Guanine nucleotide-binding protein G(i), alpha-1 subunit              | 327           | 40774        | 24.3                 | 6               | 17           | 2                   | 4.0           | 0.6             |
| 2           | 13                   | IP100746986 | na          | 41 kDa protein                                                        | 327           | 41108        | 23                   |                 |              |                     |               |                 |
|             |                      | IP100024067 | CLTC        | clathrin heavy chain 1                                                | 184           | 193260       | 3.3                  | 5               | 11           | 3                   | 4.0           | 0.1             |
| 2           | 7                    | IP100455383 | CLTC        | Isoform 2 of Clathrin heavy chain 1                                   | 184           | 189407       | 3.4                  |                 |              |                     |               |                 |
|             |                      | IP100028931 | DSG2        | Desmoglein 2                                                          | 338           | 123016       | 6.4                  | 6               | 14           | 5                   | 4.0           | 1.7             |
| 6           | 63                   | IP100291006 | MDH2        | Malate dehydrogenase, mitochondrial precursor                         | 83            | 35965        | 8.9                  | 2               | 3            | 2                   | 4.0           | 1.1             |
|             |                      | IP100022314 | SOD2        | Superoxide dismutase [Mn], mitochondrial precursor                    | 30            | 24878        | 4.1                  | 1               | 1            | 1                   | 4.0           | 0.0             |
|             |                      | IP100607577 | SOD2        | manganese superoxide dismutase isoform B precursor                    | 30            | 20882        | 4.9                  |                 |              |                     |               |                 |
|             |                      | IP100786865 | SOD2        | manganese superoxide dismutase isoform A precursor                    | 30            | 24906        | 4                    |                 |              |                     |               |                 |
| 7           | 62                   | IP100019755 | GSTO1       | Glutathione transferase omega-1                                       | 38            | 27833        | 4.1                  | 1               | 1            | 1                   | 4.0           | 0.0             |
|             |                      | IP100642936 | GSTO1       | Glutathione S-transferase omega 1                                     | 38            | 23554        | 5                    |                 |              |                     |               |                 |
| 4           | 20                   | IP100152418 | CD55        | Decay-accelerating factor splicing variant 4                          | 141           | 57209        | 11.8                 | 7               | 18           | 3                   | 4.0           | 0.5             |
|             |                      | IP100216550 | CD55        | Isoform 1 of Complement decay-accelerating factor precursor           | 141           | 49713        | 14.1                 |                 |              |                     |               |                 |
|             |                      | IP100292069 | CD55        | Isoform 2 of Complement decay-accelerating factor precursor           | 141           | 42400        | 16.3                 |                 |              |                     |               |                 |
|             |                      | IP100382926 | CD55        | Decay-accelerating factor splicing variant 5                          | 141           | 60025        | 11.3                 |                 |              |                     |               |                 |
|             |                      | IP100647119 | CD55        | Decay accelerating factor for complement                              | 141           | 39992        | 17.3                 |                 |              |                     |               |                 |
|             |                      | IP100783145 | CD55        | Decay-accelerating factor splicing variant 3                          | 141           | 42899        | 16.1                 |                 |              |                     |               |                 |
|             |                      | IP100784169 | CD55        | Decay-accelerating factor splicing variant 1                          | 141           | 49566        | 14.1                 |                 |              |                     |               |                 |
|             |                      | IP100219217 | LDHB        | L-lactate dehydrogenase B chain                                       | 847           | 36769        | 25.4                 | 8               | 27           | 2                   | 4.0           | 1.4             |
| 7           | 31                   | IP100010779 | TPM4        | Tropomyosin 4                                                         | 152           | 28619        | 9.7                  | 2               | 4            | 2                   | 3.9           | 0.6             |

| band number | protein match number | accession                                        | gene symbol    | protein description                                                          | protein score | protein mass | protein coverage (%) | unique peptides | MSMS matches | quantified peptides | average ratio | deviation ratio |  |
|-------------|----------------------|--------------------------------------------------|----------------|------------------------------------------------------------------------------|---------------|--------------|----------------------|-----------------|--------------|---------------------|---------------|-----------------|--|
| 4           | 21                   | IP100297779                                      | CCT2           | T-complex protein 1 subunit beta                                             | 134           | 57663        | 2.2                  | 1               | 3            | 1                   | 3.9           | 0.0             |  |
| 5           | 32                   | IP100171897                                      | SIGLEC6        | Sialic acid binding Ig-like lectin 6 precursor                               | 36            | 50451        | 1.7                  | 1               | 1            | 1                   | 3.9           | 0.0             |  |
|             |                      | IP100394840                                      | SIGLEC6        | sialic acid binding Ig-like lectin 6 isoform 2 precursor                     | 36            | 48793        | 1.8                  |                 |              |                     |               |                 |  |
|             |                      | IP100394841                                      | SIGLEC6        | Isoform 2 of Sialic acid-binding Ig-like lectin 6 precursor                  | 36            | 39297        | 2.2                  |                 |              |                     |               |                 |  |
| 6           | 38                   | IP100027350                                      | PRDX2          | Peroxisiredoxin-2                                                            | 42            | 21918        | 9.1                  | 2               | 3            | 2                   | 3.9           | 1.2             |  |
|             |                      | IP100375400                                      | PRDX2          | 16 kDa protein                                                               | 42            | 16149        | 12.3                 |                 |              |                     |               |                 |  |
| 2           | 25                   | IP100004503                                      | LAMP1          | lysosomal-associated membrane protein 1                                      | 52            | 45367        | 2.2                  | 1               | 2            | 1                   | 3.9           | 0.0             |  |
|             |                      | IP100556653                                      | LAMP1          | LAMP1 protein variant (Fragment)                                             | 52            | 42657        | 2.3                  |                 |              |                     |               |                 |  |
| 6           | 13                   | IP100397808                                      | LOC388720      | PREDICTED: similar to ubiquitin and ribosomal protein S27a precursor         | 170           | 18355        | 11.5                 | 2               | 8            | 2                   | 3.8           | 1.8             |  |
|             |                      | IP100179330                                      | RPS27A UBB UBC | ubiquitin and ribosomal protein S27a precursor                               | 170           | 18296        | 11.5                 |                 |              |                     |               |                 |  |
|             |                      | IP100783060                                      | RPS27A UBB UBC | Ubiquitin                                                                    | 170           | 8560         | 23.1                 |                 |              |                     |               |                 |  |
|             |                      | IP100783778                                      | RPS27A UBB UBC | 40S ribosomal protein S27a                                                   | 170           | 15687        | 12.6                 |                 |              |                     |               |                 |  |
|             |                      | IP100719280                                      | RPS27A UBB UBC | ubiquitin B precursor                                                        | 170           | 25803        | 7.9                  |                 |              |                     |               |                 |  |
|             |                      | IP100743241                                      | RPS27A UBB UBC | 44 kDa protein                                                               | 170           | 43618        | 4.6                  |                 |              |                     |               |                 |  |
|             |                      | IP100743650                                      | RPS27A UBB UBC | 44 kDa protein                                                               | 170           | 43650        | 4.6                  |                 |              |                     |               |                 |  |
|             |                      | IP100744274                                      | RPS27A UBB UBC | 44 kDa protein                                                               | 170           | 43640        | 4.6                  |                 |              |                     |               |                 |  |
|             |                      | IP100787573                                      | RPS27A UBB UBC | PREDICTED: similar to Ubiquitin-63E CG11624-PA, isoform A                    | 170           | 77464        | 2.6                  |                 |              |                     |               |                 |  |
|             |                      | IP100784990                                      | RPS27A UBB UBC | ubiquitin C                                                                  | 170           | 76982        | 11.8                 |                 |              |                     |               |                 |  |
|             |                      | IP100456429                                      | UBA52          | ubiquitin and ribosomal protein L40 precursor                                | 170           | 15004        | 14.1                 |                 |              |                     |               |                 |  |
| 5           | 14                   | IP100654777                                      | EIF3F          | Eukaryotic translation initiation factor 3 subunit 5                         | 130           | 39236        | 4.6                  | 1               | 2            | 1                   | 3.8           | 0.0             |  |
| 6           | 50                   | IP100026271                                      | RPS14          | 40S ribosomal protein S14                                                    | 34            | 16303        | 8.6                  | 1               | 1            | 1                   | 3.8           | 0.0             |  |
| 4           | 7                    | IP100020599                                      | CALR           | Calreticulin precursor                                                       | 375           | 48283        | 13.2                 | 5               | 17           | 2                   | 3.7           | 0.6             |  |
| 4           | 41                   | IP100025094                                      | MYH16          | Gene_Symbol=MYH16 cDNA: FLJ22037 fs, clone HEP08868 (Fragment)               | 39            | 87054        | 0.7                  | 1               | 2            | 1                   | 3.7           | 0.0             |  |
|             |                      | IP100009812                                      | TLR7           | Gene_Symbol=TLR7 Toll-like receptor 7                                        | 39            | 12384        | 18.5                 |                 |              |                     |               |                 |  |
| 2           | 2                    | IP100186290                                      | EEF2           | Elongation factor 2                                                          | 738           | 96115        | 14.6                 | 11              | 29           | 7                   | 3.7           | 1.3             |  |
| 3           | 8                    | IP100414676                                      | HSP90AB1       | Heat shock protein HSP 90-beta                                               | 96            | 83423        | 4.7                  | 4               | 8            | 2                   | 3.7           | 0.9             |  |
|             |                      | IP100334775                                      | na             | Hypothetical protein DKFZp761K0511                                           | 96            | 85189        | 4.4                  |                 |              |                     |               |                 |  |
| 7           | 1                    | IP100219018                                      | GAPDH          | Glyceraldehyde-3-phosphate dehydrogenase                                     | 2481          | 36070        | 48.1                 | 12              | 64           | 2                   | 3.7           | 0.4             |  |
| 5           | 9                    | IP100012007                                      | AHCY           | Adenosylhomocysteinase                                                       | 189           | 48124        | 8.1                  | 3               | 6            | 3                   | 3.7           | 1.2             |  |
| 7           | 19                   | IP100329801                                      | ANXA5          | Annexin A5                                                                   | 714           | 35840        | 22.2                 | 6               | 14           | 1                   | 3.6           | 0.0             |  |
| 7           | 4                    | IP100021263                                      | YWHAZ          | 14-3-3 protein zeta/delta                                                    | 1850          | 27899        | 41.6                 | 8               | 42           | 2                   | 3.6           | 0.7             |  |
| 6           | 5                    | IP100220362                                      | HSP61          | 10 kDa heat shock protein, mitochondrial                                     | 257           | 10794        | 33.3                 | 3               | 8            | 3                   | 3.6           | 1.1             |  |
| 6           | 28                   | IP100555956                                      | PSMB4          | Proteasome subunit beta type 4 precursor                                     | 57            | 29230        | 6.8                  | 2               | 6            | 2                   | 3.6           | 0.9             |  |
| 6           | 59                   | IP100429190                                      | RAB11A         | Ras-related protein Rab-11A                                                  | 32            | 24361        | 7.3                  | 2               | 3            | 1                   | 3.6           | 0.0             |  |
|             |                      | IP100020436                                      | RAB11B         | Ras-related protein Rab-11B                                                  | 32            | 24456        | 8.7                  |                 |              |                     |               |                 |  |
| 5           | 6                    | IP100025491                                      | EHF4A1         | Eukaryotic initiation factor 4A-1                                            | 245           | 46353        | 14                   | 4               | 8            | 3                   | 3.6           | 2.0             |  |
|             |                      | IP100386604                                      | EHF4A1         | Hypothetical protein (Fragment)                                              | 245           | 51913        | 12.1                 |                 |              |                     |               |                 |  |
|             |                      | IP10055602                                       | EHF4A1         | CD68 antigen variant (Fragment)                                              | 245           | 42846        | 28.5                 |                 |              |                     |               |                 |  |
| 7           | 46                   | IP100022202                                      | SLC25A3        | Isoform A of Phosphate carrier protein, mitochondrial precursor              | 68            | 40525        | 3.3                  | 1               | 2            | 1                   | 3.6           | 0.0             |  |
|             |                      | IP100215777                                      | SLC25A3        | Isoform B of Phosphate carrier protein, mitochondrial precursor              | 68            | 40389        | 3.3                  |                 |              |                     |               |                 |  |
| 3           | 3                    | IP100003362                                      | HSPA5          | heat shock 70kDa protein 5 (glucose-regulated protein, 78kDa)                | 171           | 72492        | 7.9                  | 6               | 17           | 1                   | 3.6           | 0.0             |  |
| 2           | 32                   | IP100297160                                      | CD44           | CD44 antigen isoform 4 precursor                                             | 34            | 39904        | 2.8                  | 1               | 1            | 1                   | 3.6           | 0.0             |  |
|             |                      | IP100305064                                      | CD44           | Isoform CD44 of CD44 antigen precursor                                       | 34            | 82017        | 1.3                  |                 |              |                     |               |                 |  |
|             |                      | IP100418465                                      | CD44           | CD44 antigen isoform 2 precursor                                             | 34            | 77078        | 1.4                  |                 |              |                     |               |                 |  |
|             |                      | IP100419219                                      | CD44           | CD44 antigen isoform 3 precursor                                             | 34            | 53891        | 2                    |                 |              |                     |               |                 |  |
|             |                      | IP100027626                                      | CCT6A          | T-complex protein 1 subunit zeta                                             | 39            | 58313        | 1.7                  | 1               | 1            | 1                   | 3.6           | 0.0             |  |
| IP100552590 | CCT6A                | chaperonin containing TCP1, subunit 6A isoform b | 39             | 53711                                                                        | 1.9           |              |                      |                 |              |                     |               |                 |  |
| 6           | 2                    | IP100221232                                      | GNMG12         | Guanine nucleotide-binding protein G(I)/G(S)/G(O) gamma-12 subunit precursor | 448           | 7984         | 29.2                 | 2               | 11           | 3                   | 3.6           | 1.2             |  |
| 7           | 25                   | IP100178083                                      | TPM3           | Topomoyosin 3                                                                | 271           | 29346        | 13.5                 | 3               | 7            | 3                   | 3.5           | 1.0             |  |
|             |                      | IP100218119                                      | TPM3           | Topomoyosin 3                                                                | 271           | 29243        | 14.5                 |                 |              |                     |               |                 |  |
|             |                      | IP100382894                                      | TPM3           | Topomoyosin 3 isoform 3                                                      | 271           | 29019        | 14.5                 |                 |              |                     |               |                 |  |
|             |                      | IP100477649                                      | TPM3           | topomoyosin 3 isoform 5                                                      | 271           | 28890        | 14.6                 |                 |              |                     |               |                 |  |
|             |                      | IP100479185                                      | TPM3           | topomoyosin 3 isoform 4                                                      | 271           | 29024        | 14.5                 |                 |              |                     |               |                 |  |
|             |                      | IP100642042                                      | TPM3           | Hypothetical protein DKFZp686l1372                                           | 271           | 27386        | 15.5                 |                 |              |                     |               |                 |  |
|             |                      | IP100026268                                      | GNB1           | Guanine nucleotide-binding protein G(I)/G(S)/G(T) subunit beta 1             | 195           | 38020        | 23.2                 | 8               | 17           | 2                   | 3.5           | 0.1             |  |
|             |                      | IP100642117                                      | GNB1           | Beta-subunit signal transducing proteins GS/GI                               | 195           | 36764        | 24.2                 |                 |              |                     |               |                 |  |
| 2           | 10                   | IP100383581                                      | GANAB          | Isoform 1 of Neutral alpha-glucosidase AB precursor                          | 253           | 107263       | 9.4                  | 10              | 24           | 5                   | 3.5           | 1.4             |  |
|             |                      | IP100472068                                      | GANAB          | 107 kDa protein                                                              | 253           | 107236       | 9.6                  |                 |              |                     |               |                 |  |
| 7           | 74                   | IP100010896                                      | CLIC1          | Chloride intracellular channel protein 1                                     | 30            | 27117        | 7.5                  | 2               | 2            | 2                   | 3.5           | 0.6             |  |
|             |                      | IP100646484                                      | na             | Chloride intracellular channel 1                                             | 30            | 26509        | 7.5                  |                 |              |                     |               |                 |  |
| 7           | 29                   | IP100152151                                      | FAM122B*       | CDNA FLJ44003 fis, clone TEST14022936                                        | 202           | 29310        | 6                    | 1               | 5            | 1                   | 3.5           | 0.0             |  |
|             |                      | IP100446175                                      | FAM122B*       | CDNA FLJ42659 fis, clone BRAMY2003008                                        | 202           | 27364        | 6.6                  |                 |              |                     |               |                 |  |
|             |                      | IP100743542                                      | FAM122B*       | 8 kDa protein                                                                | 202           | 7511         | 24.6                 |                 |              |                     |               |                 |  |
|             |                      | IP100749302                                      | FAM122B*       | Hypothetical protein DKFZp686L20116                                          | 202           | 27226        | 6.5                  |                 |              |                     |               |                 |  |
| 6           | 43                   | IP100027463                                      | SI00-046       | Protein SI00-046                                                             | 219           | 10030        | 16.7                 | 2               | 2            | 2                   | 3.5           | 1.6             |  |
| 7           | 27                   | IP100399036                                      | hCG_198468     | similar to 40S ribosomal protein SA (p40) (34/67 kDa laminin receptor)       | 255           | 33028        | 9.8                  | 2               | 4            | 1                   | 3.5           | 0.0             |  |
|             |                      | IP100398958                                      | LOC387867      | Ribosomal protein SA                                                         | 255           | 32977        | 9.8                  |                 |              |                     |               |                 |  |
|             |                      | IP100745789                                      | RP11-556K13.1  | similar to 40S ribosomal protein SA (p40) (34/67 kDa laminin receptor)       | 255           | 32808        | 9.9                  |                 |              |                     |               |                 |  |
|             |                      | IP100413108                                      | RPSA           | 33 kDa protein                                                               | 255           | 33002        | 9.7                  |                 |              |                     |               |                 |  |
|             |                      | IP100456731                                      | RPSA           | hypothetical protein LOC388524                                               | 255           | 33007        | 9.7                  |                 |              |                     |               |                 |  |
|             |                      | IP100553164                                      | RPSA           | 40S ribosomal protein SA                                                     | 255           | 32816        | 9.8                  |                 |              |                     |               |                 |  |
|             |                      | IP100411639                                      | RPSA15         | Laminin receptor-like protein LAMRL5                                         | 255           | 33089        | 9.8                  |                 |              |                     |               |                 |  |
|             |                      | IP100000874                                      | PRDX1          | Peroxisiredoxin-1                                                            | 242           | 22324        | 26.6                 | 6               | 17           | 3                   | 3.4           | 0.5             |  |
| IP100640741 | PRDX1                | 19 kDa protein                                   | 242            | 19135                                                                        | 31            |              |                      |                 |              |                     |               |                 |  |
| 2           | 18                   | IP100021290                                      | ACLY           | ATP-citrate synthase                                                         | 79            | 121660       | 2.5                  | 2               | 5            | 2                   | 3.4           | 1.5             |  |
|             |                      | IP100394838                                      | ACLY           | ATP citrate lyase isoform 2                                                  | 79            | 120608       | 2.4                  |                 |              |                     |               |                 |  |
|             |                      | IP100640847                                      | ACLY           | ATP citrate lyase isoform 1                                                  | 79            | 121674       | 2.4                  |                 |              |                     |               |                 |  |
| 7           | 52                   | IP100216587                                      | RPS8           | 40S ribosomal protein S8                                                     | 49            | 24344        | 7.2                  | 1               | 2            | 1                   | 3.4           | 0.0             |  |
|             |                      | IP100645201                                      | RPS8           | Ribosomal protein S8                                                         | 49            | 22094        | 8                    |                 |              |                     |               |                 |  |
| 1           | 6                    | IP100786995                                      | LOC731751      | PREDICTED: similar to protein kinase, DNA-activated, catalytic polypeptide   | 113           | 470127       | 1.8                  | 6               | 7            | 4                   | 3.4           | 1.8             |  |
|             |                      | IP100296337                                      | PRKDC          | Isoform 1 of DNA-dependent protein kinase catalytic subunit                  | 113           | 473749       | 1.7                  |                 |              |                     |               |                 |  |
|             |                      | IP100376215                                      | PRKDC          | Isoform 2 of DNA-dependent protein kinase catalytic subunit                  | 113           | 470163       | 1.8                  |                 |              |                     |               |                 |  |
| 7           | 42                   | IP100465431                                      | LGALS3         | Galectin-3                                                                   | 84            | 26098        | 8.4                  | 2               | 4            | 2                   | 3.3           | 0.1             |  |
| 5           | 2                    | IP100465248                                      | ENO1           | enolase 1                                                                    | 1481          | 47481        | 31.8                 | 15              | 71           | 7                   | 3.3           | 1.2             |  |

| band number | protein match number | accession                | gene symbol    | protein description                                                          | protein score | protein mass   | protein coverage (%) | unique peptides | MSMS matches | quantified peptides | average ratio | deviation ratio |
|-------------|----------------------|--------------------------|----------------|------------------------------------------------------------------------------|---------------|----------------|----------------------|-----------------|--------------|---------------------|---------------|-----------------|
| 5           | 1                    | PI00169383               | PGK1           | Phosphoglycerate kinase 1                                                    | 1789          | 44854          | 35.7                 | 14              | 59           | 4                   | 3.3           | 0.6             |
| 7           | 36                   | PI00554788<br>PI00784347 | KRT18<br>KRT18 | 49 kDa protein<br>Keratin, type I cytoskeletal 18                            | 126<br>126    | 48793<br>47897 | 4.9<br>4.8           | 2               | 4            | 2                   | 3.3           | 0.8             |
| 7           | 10                   | PI00018146               | YWHAQ          | 14-3-3 protein theta                                                         | 933           | 28032          | 24.5                 | 6               | 27           | 2                   | 3.3           | 1.2             |
| 7           | 59                   | PI00413641               | AKR1B1         | Aldose reductase                                                             | 40            | 36099          | 5.1                  | 2               | 2            | 2                   | 3.3           | 0.6             |
| 5           | 25                   | PI00027438               | FLOT1          | Flotillin-1                                                                  | 54            | 47554          | 7.3                  | 3               | 3            | 3                   | 3.3           | 1.5             |
| 4           | 49                   | PI00470711               | EFR3A          | EFR3 homolog A (S. cerevisiae)                                               | 33            | 89430          | 1                    | 1               | 1            | 1                   | 3.2           | 0.0             |
| 7           | 2                    | PI00418169               | ANXA2          | annexin A2 isoform 1                                                         | 2463          | 40671          | 47.3                 | 15              | 64           | 2                   | 3.2           | 0.2             |
|             |                      | PI00455315               | ANXA2          | Annexin A2                                                                   | 2463          | 38677          | 49.9                 |                 |              |                     |               |                 |
| 7           | 14                   | PI00465028               | TP1*           | Triosephosphate isomerase                                                    | 856           | 30802          | 28.7                 | 8               | 26           | 2                   | 3.2           | 0.8             |
| 7           | 73                   | PI00219617               | PRPS2          | Ribose-phosphate pyrophosphokinase II                                        | 30            | 35015          | 1.9                  | 1               | 1            | 1                   | 3.2           | 0.0             |
|             |                      | PI00718888               | PRPS2          | phosphoribosyl pyrophosphate synthetase 2 isoform 1                          | 30            | 35431          | 1.9                  |                 |              |                     |               |                 |
| 7           | 16                   | PI00220642               | YWHAQ          | 14-3-3 protein gamma                                                         | 841           | 28325          | 20.2                 | 5               | 24           | 2                   | 3.2           | 0.3             |
| 4           | 36                   | PI00010676               | PLAUR          | Isoform 1 of Urokinase plasminogen activator surface receptor precursor      | 44            | 38607          | 3.6                  | 1               | 1            | 1                   | 3.1           | 0.0             |
|             |                      | PI00215706               | PLAUR          | Isoform 2 of Urokinase plasminogen activator surface receptor precursor      | 44            | 32782          | 4.3                  |                 |              |                     |               |                 |
|             |                      | PI00215707               | PLAUR          | Isoform 3 of Urokinase plasminogen activator surface receptor precursor      | 44            | 33378          | 4.1                  |                 |              |                     |               |                 |
| 2           | 3                    | PI00006482               | ATP1A1         | Isoform Long of Sodium/potassium-transporting ATPase alpha-1 chain precursor | 443           | 114135         | 9.6                  | 9               | 17           | 3                   | 3.1           | 2.2             |
| 6           | 3                    | PI00216691               | PFN1           | Profilin-1                                                                   | 323           | 15085          | 23.6                 | 3               | 12           | 3                   | 3.1           | 0.8             |
| 6           | 37                   | PI00550363               | TAGLN2         | Transgelin-2                                                                 | 42            | 22417          | 5.5                  | 1               | 1            | 1                   | 3.1           | 0.0             |
|             |                      | PI00644531               | TAGLN2         | 21 kDa protein                                                               | 42            | 21244          | 5.9                  |                 |              |                     |               |                 |
|             |                      | PI00647915               | TAGLN2         | 24 kDa protein                                                               | 42            | 24609          | 5                    |                 |              |                     |               |                 |
| 5           | 27                   | PI00029625               | FLOT2          | flotillin 2                                                                  | 44            | 47434          | 4.6                  | 2               | 2            | 2                   | 3.1           | 1.4             |
| 4           | 30                   | PI00002927               | CT74           | T-complex protein 1 subunit delta                                            | 71            | 58750          | 4.3                  | 2               | 3            | 1                   | 3.1           | 0.0             |
| 6           | 27                   | PI00215780               | RPS19          | 60S ribosomal protein S19                                                    | 59            | 15919          | 6.2                  | 1               | 1            | 1                   | 3.1           | 0.0             |
| 4           | 24                   | PI00002520               | SHMT2          | Serine hydroxymethyltransferase, mitochondrial precursor                     | 124           | 56414          | 8.9                  | 5               | 8            | 3                   | 3.1           | 0.5             |
|             |                      | PI00748411               | SHMT2          | SHMT2 protein (Fragment)                                                     | 124           | 53561          | 8.8                  |                 |              |                     |               |                 |
| 4           | 22                   | PI00306959               | KRT17          | Keratin, type II cytoskeletal 7                                              | 130           | 51312          | 9.2                  | 4               | 6            | 3                   | 3.1           | 0.7             |
| 7           | 41                   | PI00171199               | PSMA3          | Isoform 2 of Proteasome subunit alpha type 3                                 | 98            | 27277          | 4.8                  | 1               | 2            | 1                   | 3.0           | 0.0             |
|             |                      | PI00419249               | PSMA3          | proteasome alpha 3 subunit isoform 1                                         | 98            | 28643          | 4.7                  |                 |              |                     |               |                 |
| 4           | 9                    | PI00011200               | PHGDH          | D-3-phosphoglycerate dehydrogenase                                           | 317           | 57225          | 10.7                 | 4               | 8            | 2                   | 3.0           | 0.2             |
| 5           | 10                   | PI00171438               | TXNDC5         | Thioredoxin domain-containing protein 5 precursor                            | 188           | 48283          | 5.8                  | 2               | 7            | 1                   | 3.0           | 0.0             |
|             |                      | PI00395646               | TXNDC5         | thioredoxin domain containing 5 isoform 2                                    | 188           | 44440          | 6.4                  |                 |              |                     |               |                 |
| 6           | 4                    | PI00011302               | CD59           | CD59 glycoprotein precursor                                                  | 312           | 14795          | 25                   | 3               | 17           | 3                   | 3.0           | 0.3             |
| 6           | 25                   | PI00024919               | PRDX3          | Thioredoxin-dependent peroxide reductase, mitochondrial precursor            | 61            | 28017          | 4.3                  | 1               | 3            | 1                   | 3.0           | 0.0             |
|             |                      | PI00374151               | PRDX3          | peroxiredoxin 3 isoform b                                                    | 61            | 26107          | 4.6                  |                 |              |                     |               |                 |
| 7           | 28                   | PI00023748               | NACA           | Nascent polypeptide-associated complex subunit alpha                         | 219           | 23370          | 7                    | 1               | 3            | 1                   | 3.0           | 0.0             |
| 2           | 21                   | PI00009342               | IQGAP1         | Ras G1Pase-activating-like protein IQGAP1                                    | 60            | 189761         | 1                    | 1               | 1            | 1                   | 3.0           | 0.0             |
| 2           | 22                   | PI00007402               | IPO7           | 120 kDa protein                                                              | 59            | 120936         | 0.9                  | 1               | 2            | 1                   | 3.0           | 0.0             |
|             |                      | PI00784008               | IPO7           | Impartin-7                                                                   | 59            | 120751         | 0.8                  |                 |              |                     |               |                 |
| 2           | 28                   | PI00013452               | EPRS           | glutamyl-prolyl tRNA synthetase                                              | 39            | 172080         | 2.1                  | 2               | 2            | 1                   | 3.0           | 1.9             |
| 3           | 7                    | PI00643920               | TKT            | Transketolase                                                                | 102           | 68519          | 7                    | 5               | 13           | 3                   | 3.0           | 0.4             |
| 6           | 32                   | PI00375704               | PSMB5          | Hypothetical protein DKFzP68610180 (Fragment)                                | 48            | 28962          | 6.8                  | 2               | 4            | 2                   | 2.9           | 0.0             |
|             |                      | PI00479306               | PSMB5          | proteasome beta 5 subunit                                                    | 48            | 28633          | 6.8                  |                 |              |                     |               |                 |
| 3           | 13                   | PI00016066               | BXDC1          | Brix domain-containing protein 1                                             | 35            | 33108          | 1.8                  | 1               | 2            | 1                   | 2.9           | 0.0             |
|             |                      | PI00396329               | BXDC1          | Brix domain-containing protein 1                                             | 35            | 35731          | 2                    |                 |              |                     |               |                 |
|             |                      | PI00007219               | CYP2C9         | Cytochrome P450 2C9                                                          | 35            | 56333          | 1.2                  |                 |              |                     |               |                 |
| 4           | 46                   | PI00302925               | CCT8           | Chaperonin containing TCP1, subunit 8                                        | 34            | 60311          | 1.6                  | 1               | 1            | 1                   | 2.9           | 0.0             |
|             |                      | PI00784090               | CCT8           | T-complex protein 1 subunit theta                                            | 34            | 60022          | 1.6                  |                 |              |                     |               |                 |
| 6           | 12                   | PI00012048               | NME1 NME2      | Nucleoside diphosphate kinase A                                              | 178           | 17309          | 34.2                 | 4               | 19           | 3                   | 2.9           | 0.2             |
|             |                      | PI00375531               | NME1 NME2      | non-metastatic cells 1, protein (NM23A) expressed in isoform a               | 178           | 19669          | 29.4                 |                 |              |                     |               |                 |
| 6           | 36                   | PI00743317               | na             | Similar to 60S ribosomal protein L31                                         | 44            | 5490           | 18.8                 | 1               | 1            | 1                   | 2.9           | 0.0             |
|             |                      | PI00787579               | na             | PREDICTED: similar to ribosomal protein L31                                  | 44            | 6002           | 16.5                 |                 |              |                     |               |                 |
|             |                      | PI00026302               | RPL31          | 60S ribosomal protein L31                                                    | 44            | 14454          | 7.2                  |                 |              |                     |               |                 |
| 2           | 5                    | PI00027230               | HSP90B1        | Endoplasmic precursor                                                        | 391           | 92696          | 12                   | 8               | 16           | 6                   | 2.9           | 0.5             |
| 4           | 26                   | PI00007750               | TUBA4A         | Tubulin alpha-1 chain                                                        | 99            | 50634          | 12.9                 | 6               | 14           | 3                   | 2.9           | 0.5             |
| 7           | 5                    | PI00217966               | LDHA           | lactate dehydrogenase A                                                      | 1552          | 36950          | 36.7                 | 14              | 58           | 3                   | 2.8           | 0.5             |
| 6           | 30                   | PI00395906               | MGC59937       | Similar to RIKEN cDNA 2310002J15 gene                                        | 53            | 16300          | 16.7                 | 2               | 2            | 2                   | 2.8           | 1.9             |
| 6           | 17                   | PI00221222               | SUB1           | SUB1 homolog (S. Cerevisiae)                                                 | 102           | 14255          | 8.7                  | 1               | 2            | 1                   | 2.8           | 0.0             |
| 4           | 37                   | PI00329572               | PACSN3         | 49 kDa protein                                                               | 43            | 48901          | 3.8                  | 1               | 2            | 1                   | 2.8           | 0.0             |
|             |                      | PI00783170               | PACSN3         | Protein kinase C and casein kinase substrate in neurons protein 3            | 43            | 48799          | 3.6                  |                 |              |                     |               |                 |
| 7           | 51                   | PI00305551               | GNA11          | Guanine nucleotide-binding protein subunit alpha-11                          | 53            | 42382          | 4.2                  | 1               | 1            | 1                   | 2.8           | 0.0             |
| 7           | 12                   | PI00000816               | YWHAQ          | 14-3-3 protein epsilon                                                       | 863           | 29326          | 43.1                 | 9               | 33           | 2                   | 2.8           | 1.4             |
| 6           | 11                   | PI00026260               | NME2           | Nucleoside diphosphate kinase B                                              | 181           | 17401          | 37.5                 | 5               | 21           | 4                   | 2.8           | 0.4             |
|             |                      | PI00064590               | NME2           | NME1-NME2 protein                                                            | 181           | 32906          | 19.5                 |                 |              |                     |               |                 |
| 7           | 44                   | PI00025312               | HSPB1*         | Heat-shock protein beta-1                                                    | 79            | 22826          | 13.2                 | 2               | 2            | 2                   | 2.7           | 2.0             |
| 7           | 35                   | PI00453476               | PGAM1          | Phosphoglycerate mutase 1                                                    | 130           | 29003          | 26.4                 | 4               | 8            | 3                   | 2.7           | 0.5             |
|             |                      | PI00549725               | PGAM1          | Phosphoglycerate mutase 1                                                    | 130           | 28769          | 26.4                 |                 |              |                     |               |                 |
|             |                      | PI00740800               | PGAM1          | Phosphoglycerate mutase 1                                                    | 130           | 25978          | 28.4                 |                 |              |                     |               |                 |
| 7           | 8                    | PI00216318               | YWHAQ          | tyrosine 3-monooxygenase/tryptophan 5-monooxygenase activation protein       | 1199          | 28179          | 36.6                 | 8               | 35           | 2                   | 2.7           | 0.7             |
|             |                      | PI00759832               | YWHAQ          | Isoform Short of 14-3-3 protein beta/alpha                                   | 1199          | 27947          | 36.9                 |                 |              |                     |               |                 |
| 6           | 42                   | PI00375511               | RPL15          | 26 kDa protein                                                               | 40            | 25829          | 3.8                  | 1               | 1            | 1                   | 2.7           | 0.0             |
|             |                      | PI00470528               | RPL15          | 60S ribosomal protein L15                                                    | 40            | 24114          | 4.4                  |                 |              |                     |               |                 |
|             |                      | PI00550032               | RPL15          | OTTUMP0000016039                                                             | 40            | 24273          | 4.4                  |                 |              |                     |               |                 |
| 2           | 11                   | PI00645078               | UBA1           | Ubiquitin-activating enzyme E1                                               | 248           | 118858         | 7.6                  | 6               | 14           | 4                   | 2.7           | 1.0             |
| 5           | 16                   | PI00299571               | PDIA6          | similar to Protein disulfide isomerase A6                                    | 109           | 54408          | 3.5                  | 1               | 2            | 1                   | 2.7           | 0.0             |
|             |                      | PI00644989               | PDIA6          | Protein disulfide-isomerase A6 precursor                                     | 109           | 48490          | 3.9                  |                 |              |                     |               |                 |
| 4           | 3                    | PI00007752               | TUBB2C         | Tubulin beta-2C chain                                                        | 608           | 50255          | 25.8                 | 10              | 30           | 3                   | 2.7           | 0.1             |
| 4           | 4                    | PI00011654               | TUBB           | Tubulin beta-2 chain                                                         | 485           | 50995          | 22.5                 | 9               | 26           | 3                   | 2.7           | 0.1             |
| 1           | 5                    | PI00026781               | FASN           | fatty acid synthase                                                          | 231           | 275850         | 4.6                  | 10              | 14           | 4                   | 2.7           | 0.7             |
|             |                      | PI00645907               | FASN           | fatty acid synthase                                                          | 231           | 275877         | 4.6                  |                 |              |                     |               |                 |
| 6           | 58                   | PI00168831               | SAMSN1         | Isoform 2 of SAM domain-containing protein SAMSN-1                           | 32            | 23623          | 2.9                  | 1               | 1            | 1                   | 2.7           | 0.0             |
|             |                      | PI00185526               | SAMSN1         | SAM-domain protein SAMSN-1                                                   | 32            | 50193          | 1.7                  |                 |              |                     |               |                 |
|             |                      | PI00339277               | SAMSN1         | Isoform 1 of SAM domain-containing protein SAMSN-1                           | 32            | 41967          | 1.6                  |                 |              |                     |               |                 |
|             |                      | PI00782942               | SAMSN1         | 59 kDa protein                                                               | 32            | 59635          | 1.1                  |                 |              |                     |               |                 |

| band number | protein match number | accession   | gene symbol | protein description                                                          | protein score | protein mass | protein coverage (%) | unique peptides | MSMS matches | quantified peptides | average ratio | deviation ratio |
|-------------|----------------------|-------------|-------------|------------------------------------------------------------------------------|---------------|--------------|----------------------|-----------------|--------------|---------------------|---------------|-----------------|
| 1           | 4                    | PII00783644 | SAMSN1      | 61 kDa protein                                                               | 32            | 61716        | 1.1                  |                 |              |                     |               |                 |
|             |                      | PII00021812 | AHNAK       | Neuroblast differentiation-associated protein AHNAK (Fragment)               | 472           | 312580       | 1.9                  | 11              | 25           | 3                   | 2.7           | 0.5             |
|             |                      | PII00555610 | AHNAK       | Neuroblast differentiation-associated protein AHNAK (Fragment)               | 472           | 312619       | 3.8                  |                 |              |                     |               |                 |
| 7           | 9                    | PII00441498 | FOLR1       | Folate receptor alpha precursor                                              | 1140          | 30712        | 27.2                 | 6               | 35           | 3                   | 2.7           | 1.1             |
| 5           | 31                   | PII00013847 | UQCRC1      | Ubiquinol-cytochrome-c reductase complex core protein 1                      | 37            | 53297        | 2.5                  | 1               | 2            | 1                   | 2.6           | 0.0             |
| 7           | 65                   | PII00019976 | CCDC85B     | Delta-interacting protein A                                                  | 35            | 22419        | 3.5                  | 1               | 4            | 1                   | 2.6           | 0.0             |
| 5           | 19                   | PII00303882 | M6PRBP1     | Isoform B of Mannose-6-phosphate receptor-binding protein 1                  | 92            | 47189        | 6.5                  | 2               | 2            | 2                   | 2.6           | 0.0             |
| 3           | 12                   | PII00219365 | MSN         | Moessin                                                                      | 42            | 67761        | 5                    | 3               | 4            | 3                   | 2.6           | 0.3             |
| 6           | 15                   | PII00000811 | PSMB6       | Proteasome subunit beta type 6 precursor                                     | 136           | 25570        | 13                   | 3               | 6            | 3                   | 2.6           | 0.5             |
| 4           | 16                   | PII00437102 | HSPD1       | Heat shock protein 60                                                        | 163           | 61346        | 15.1                 | 7               | 10           | 2                   | 2.6           | 0.2             |
|             |                      | PII00784154 | HSPD1       | 60 kDa heat shock protein, mitochondrial precursor                           | 163           | 61187        | 14.7                 |                 |              |                     |               |                 |
| 2           | 14                   | PII00022462 | TERC        | Transferin receptor protein 1                                                | 175           | 85274        | 5                    | 2               | 8            | 3                   | 2.6           | 1.0             |
| 4           | 11                   | PII00010796 | P4HB        | Protein disulfide-isomerase precursor                                        | 292           | 57480        | 7.3                  | 3               | 6            | 3                   | 2.6           | 0.4             |
| 7           | 34                   | PII00293427 | ZNRF2*      | zinc finger/RING finger 2                                                    | 134           | 24613        | 18.6                 | 2               | 4            | 2                   | 2.6           | 0.2             |
| 2           | 31                   | PII00217240 | WDR75       | WD repeat protein 75                                                         | 34            | 95921        | 1.3                  | 1               | 1            | 1                   | 2.6           | 0.0             |
| 6           | 9                    | PII00024915 | PRDX5       | Isoform Mitochondrial of Peroxiredoxin-5, mitochondrial precursor            | 201           | 22298        | 7.9                  | 1               | 4            | 1                   | 2.6           | 0.0             |
|             |                      | PII00375306 | PRDX5       | peroxiredoxin 5 precursor, isoform b                                         | 201           | 17611        | 10                   |                 |              |                     |               |                 |
|             |                      | PII00375307 | PRDX5       | peroxiredoxin 5 precursor, isoform c                                         | 201           | 13000        | 13.6                 |                 |              |                     |               |                 |
|             |                      | PII00759663 | PRDX5       | Isoform Cytoplasmic+peroxisomal of Peroxiredoxin-5, mitochondrial precursor  | 201           | 17191        | 10.5                 |                 |              |                     |               |                 |
| 7           | 11                   | PII00220578 | GNAI3       | Guanine nucleotide-binding protein (Gk) subunit alpha                        | 890           | 40945        | 33.1                 | 9               | 29           | 1                   | 2.6           | 0.0             |
| 3           | 10                   | PII00012079 | EIF4B       | Eukaryotic translation initiation factor 4B                                  | 46            | 69240        | 2.1                  | 1               | 1            | 1                   | 2.6           | 0.0             |
|             |                      | PII00439415 | EIF4B       | eukaryotic translation initiation factor 4B                                  | 46            | 69167        | 2.1                  |                 |              |                     |               |                 |
| 6           | 10                   | PII00335168 | MYL6        | myosin, light polypeptide 6, alkali, smooth muscle and non-muscle isoform 1  | 200           | 17090        | 15.9                 | 2               | 8            | 2                   | 2.6           | 1.0             |
|             |                      | PII00744444 | MYL6        | myosin, light chain 6B, alkali, smooth muscle and non-muscle                 | 200           | 17513        | 15.1                 |                 |              |                     |               |                 |
|             |                      | PII00027255 | MYL6B       | Myosin light polypeptide 6B                                                  | 200           | 22864        | 11.5                 |                 |              |                     |               |                 |
|             |                      | PII00413922 | MYL6B       | Isoform Smooth muscle of Myosin light polypeptide 6                          | 200           | 16990        | 24.7                 |                 |              |                     |               |                 |
| 6           | 16                   | PII00219153 | RPL22       | 60S ribosomal protein L22                                                    | 131           | 14704        | 10.2                 | 1               | 2            | 1                   | 2.5           | 0.0             |
|             |                      | PII00787417 | RPL22       | PREDICTED: similar to 60S ribosomal protein L22                              | 131           | 8183         | 17.5                 |                 |              |                     |               |                 |
| 7           | 17                   | PII00218918 | ANXA1       | Annexin A1                                                                   | 769           | 38787        | 29.8                 | 7               | 15           | 2                   | 2.5           | 0.6             |
| 5           | 23                   | PII00020632 | ASS1        | ArgininosuccinAte synthetase                                                 | 74            | 51184        | 6.4                  | 4               | 7            | 3                   | 2.5           | 0.2             |
| 3           | 4                    | PII00554711 | JUP         | Junction plakoglobin                                                         | 162           | 82245        | 5.2                  | 3               | 5            | 2                   | 2.5           | 1.2             |
| 5           | 13                   | PII00025366 | CS          | Citrate synthase, mitochondrial precursor                                    | 134           | 51908        | 6.7                  | 3               | 7            | 3                   | 2.5           | 0.4             |
|             |                      | PII00383539 | CS          | citrate synthase precursor, isoform b                                        | 134           | 44846        | 7.4                  |                 |              |                     |               |                 |
| 4           | 47                   | PII00478832 | FBF1        | FBF1 protein                                                                 | 33            | 91098        | 1.1                  | 1               | 1            | 1                   | 2.5           | 0.0             |
|             |                      | PII00480024 | FBF1        | PREDICTED: similar to Fas (TNFRSF6) binding factor 1 isoform 3               | 33            | 125811       | 0.8                  |                 |              |                     |               |                 |
|             |                      | PII00647873 | FBF1        | 90 kDa protein                                                               | 33            | 90436        | 1.1                  |                 |              |                     |               |                 |
|             |                      | PII00787675 | FBF1        | FL00103 protein (Fragment)                                                   | 33            | 71284        | 15.1                 |                 |              |                     |               |                 |
|             |                      | PII00738597 | na          | PREDICTED: similar to Fas (TNFRSF6) binding factor 1 isoform 5               | 33            | 92551        | 1.1                  |                 |              |                     |               |                 |
| 2           | 15                   | PII00027442 | AARS        | Alanyl-tRNA synthetase, cytoplasmic                                          | 128           | 107484       | 6.8                  | 5               | 7            | 4                   | 2.5           | 0.5             |
|             |                      | PII00784131 | AARS        | 107 kDa protein                                                              | 128           | 107384       | 6.8                  |                 |              |                     |               |                 |
| 6           | 39                   | PII00514952 | FRMD4A      | Novel protein                                                                | 41            | 60677        | 4                    | 2               | 2            | 1                   | 2.4           | 0.0             |
|             |                      | PII00644865 | FRMD4A      | Novel protein                                                                | 41            | 115958       | 2                    |                 |              |                     |               |                 |
|             |                      | PII00748339 | FRMD4A      | 114 kDa protein                                                              | 41            | 114419       | 2.1                  |                 |              |                     |               |                 |
| 7           | 50                   | PII00218373 | na          | Isoform 4 of Proteasome subunit alpha type 7                                 | 53            | 18642        | 8.3                  | 1               | 2            | 1                   | 2.4           | 0.0             |
|             |                      | PII00647838 | na          | Proteasome subunit alpha type                                                | 53            | 16467        | 9.4                  |                 |              |                     |               |                 |
|             |                      | PII00024175 | PSMA7       | Isoform 1 of Proteasome subunit alpha type 7                                 | 53            | 28041        | 5.6                  |                 |              |                     |               |                 |
|             |                      | PII00218372 | PSMA7       | Isoform 2 of Proteasome subunit alpha type 7                                 | 53            | 20238        | 7.9                  |                 |              |                     |               |                 |
|             |                      | PII00647380 | PSMA7       | OPTHUMP0000031453                                                            | 53            | 21315        | 7.3                  |                 |              |                     |               |                 |
|             |                      | PII00154509 | PSMA8       | Isoform 1 of Proteasome subunit alpha type 7-like                            | 53            | 28683        | 5.5                  |                 |              |                     |               |                 |
|             |                      | PII00219950 | PSMA8       | Isoform 2 of Proteasome subunit alpha type 7-like                            | 53            | 23745        | 6.6                  |                 |              |                     |               |                 |
|             |                      | PII00748423 | PSMA8       | Isoform 3 of Proteasome subunit alpha type 7-like                            | 53            | 27997        | 5.6                  |                 |              |                     |               |                 |
| 1           | 2                    | PII00302592 | FLNA        | Filamin A, alpha                                                             | 602           | 282580       | 5                    | 10              | 21           | 3                   | 2.4           | 0.4             |
|             |                      | PII00333541 | FLNA        | Filamin-A                                                                    | 602           | 283192       | 5                    |                 |              |                     |               |                 |
|             |                      | PII00644576 | FLNA        | Filamin A, alpha                                                             | 602           | 279115       | 5.1                  |                 |              |                     |               |                 |
| 3           | 16                   | PII00164387 | KCNMA1      | Isoform 5 of Calcium-activated potassium channel subunit alpha 1             | 32            | 132568       | 0.5                  | 1               | 2            | 1                   | 2.4           | 0.0             |
|             |                      | PII00410168 | KCNMA1      | Isoform 2 of Calcium-activated potassium channel subunit alpha 1             | 32            | 137176       | 0.5                  |                 |              |                     |               |                 |
|             |                      | PII00410169 | KCNMA1      | Isoform 3 of Calcium-activated potassium channel subunit alpha 1             | 32            | 139994       | 0.5                  |                 |              |                     |               |                 |
|             |                      | PII00410170 | KCNMA1      | Isoform 4 of Calcium-activated potassium channel subunit alpha 1             | 32            | 135929       | 0.5                  |                 |              |                     |               |                 |
|             |                      | PII00410173 | KCNMA1      | Isoform 7 of Calcium-activated potassium channel subunit alpha 1             | 32            | 139976       | 0.5                  |                 |              |                     |               |                 |
|             |                      | PII00426186 | KCNMA1      | Potassium large conductance calcium-activated channel, subfamily M, alpha 1  | 32            | 135498       | 0.5                  |                 |              |                     |               |                 |
|             |                      | PII00478411 | KCNMA1      | Isoform 1 of Calcium-activated potassium channel subunit alpha 1             | 32            | 139880       | 0.5                  |                 |              |                     |               |                 |
|             |                      | PII00642051 | KCNMA1      | Potassium large conductance calcium-activated channel, subfamily M, alpha 1  | 32            | 134470       | 0.5                  |                 |              |                     |               |                 |
|             |                      | PII00642598 | KCNMA1      | Potassium large conductance calcium-activated channel, subfamily M, alpha 1  | 32            | 133053       | 0.5                  |                 |              |                     |               |                 |
|             |                      | PII00644665 | KCNMA1      | Potassium large conductance calcium-activated channel, subfamily M, alpha 1  | 32            | 133713       | 0.5                  |                 |              |                     |               |                 |
|             |                      | PII00645064 | KCNMA1      | Potassium large conductance calcium-activated channel, subfamily M, alpha 1  | 32            | 133821       | 0.5                  |                 |              |                     |               |                 |
|             |                      | PII00645602 | KCNMA1      | Potassium large conductance calcium-activated channel, subfamily M, alpha 1  | 32            | 132457       | 0.5                  |                 |              |                     |               |                 |
|             |                      | PII00645778 | KCNMA1      | Potassium large conductance calcium-activated channel, subfamily M, alpha 1  | 32            | 139951       | 0.5                  |                 |              |                     |               |                 |
|             |                      | PII00647276 | KCNMA1      | Potassium large conductance calcium-activated channel, subfamily M, alpha 1  | 32            | 137349       | 0.5                  |                 |              |                     |               |                 |
| 5           | 20                   | PII00305383 | UQCRC2      | Ubiquinol-cytochrome-c reductase complex core protein 2                      | 90            | 48584        | 3.5                  | 1               | 2            | 1                   | 2.4           | 0.0             |
| 7           | 67                   | PII00442228 | WDR27       | CDNA FLJ16563 fis. clone SYNOV4005739                                        | 33            | 24061        | 4.2                  | 1               | 1            | 1                   | 2.4           | 0.0             |
|             |                      | PII00443642 | WDR27       | CDNA FLJ46815 fis. clone TRACH3036897                                        | 33            | 28063        | 3.6                  |                 |              |                     |               |                 |
| 7           | 6                    | PII00465439 | ALDOA       | Fructose-bisphosphate aldolase A                                             | 1323          | 39720        | 43.4                 | 13              | 40           | 2                   | 2.4           | 0.3             |
| 3           | 1                    | PII00007765 | HSPA9       | Stress-70 protein, mitochondrial precursor                                   | 195           | 73920        | 3.7                  | 2               | 5            | 2                   | 2.4           | 0.3             |
| 4           | 5                    | PII00657680 | na          | 55 kDa protein                                                               | 437           | 55328        | 18.5                 | 9               | 24           | 2                   | 2.4           | 0.1             |
| 4           | 5                    | PII00025252 | PDI3A       | Protein disulfide-isomerase A3 precursor                                     | 437           | 57146        | 18.4                 | 9               | 24           | 2                   | 2.4           | 0.1             |
| 6           | 26                   | PII00298547 | PARK7       | Protein DJ-1                                                                 | 60            | 20050        | 20.6                 | 3               | 3            | 2                   | 2.4           | 1.9             |
| 6           | 19                   | PII00024920 | ATPSD       | ATP synthase delta chain, mitochondrial precursor                            | 86            | 17479        | 8.3                  | 1               | 1            | 1                   | 2.4           | 0.0             |
| 5           | 7                    | PII00010157 | MAT2A       | S-adenosylmethionine synthetase isoform type-2                               | 210           | 43975        | 7.6                  | 2               | 6            | 2                   | 2.3           | 0.6             |
| 4           | 6                    | PII00299024 | BASP1       | Brain acid soluble protein 1                                                 | 419           | 23540        | 54.2                 | 6               | 22           | 2                   | 2.3           | 0.2             |
| 2           | 4                    | PII00011062 | CPS1        | Isoform 1 of Carbamoyl-phosphate synthase [ammonia], mitochondrial precursor | 414           | 165975       | 7                    | 10              | 24           | 3                   | 2.3           | 1.9             |
| 6           | 54                   | PII00170796 | VPS29       | Isoform 1 of Vacuolar protein sorting 29                                     | 33            | 20664        | 5.5                  | 1               | 1            | 1                   | 2.3           | 0.0             |
|             |                      | PII00184284 | VPS29       | Isoform 2 of Vacuolar protein sorting 29                                     | 33            | 21085        | 5.4                  |                 |              |                     |               |                 |
| 4           | 2                    | PII00303476 | ATPSB       | ATP synthase subunit beta, mitochondrial precursor                           | 744           | 56525        | 15.1                 | 6               | 21           | 3                   | 2.3           | 0.6             |
| 6           | 24                   | PII00783862 | BLVRB       | Flavin reductase                                                             | 63            | 22088        | 4.9                  | 1               | 4            | 1                   | 2.3           | 0.0             |

| band number | protein match number | accession   | gene symbol | protein description                                               | protein score | protein mass | protein coverage (%) | unique peptides | MSMS matches | quantified peptides | average ratio | deviation ratio |
|-------------|----------------------|-------------|-------------|-------------------------------------------------------------------|---------------|--------------|----------------------|-----------------|--------------|---------------------|---------------|-----------------|
|             |                      | IPI00219910 | na          | 23 kDa protein                                                    | 63            | 22751        | 4.8                  |                 |              |                     |               |                 |
| 5           | 29                   | IPI00013122 | CDC37       | Hsp90 co-chaperone Cdc37                                          | 40            | 44953        | 2.4                  | 1               | 2            | 1                   | 2.2           | 0.0             |
| 6           | 48                   | IPI00219622 | PSMA2       | Proteasome subunit alpha type 2                                   | 35            | 25865        | 3                    | 1               | 1            | 1                   | 2.2           | 0.0             |
| 5           | 5                    | IPI00000875 | EEF1G       | Elongation factor 1-gamma                                         | 276           | 50298        | 13.8                 | 7               | 13           | 4                   | 2.2           | 0.4             |
|             |                      | IPI00747497 | EEF1G       | 50 kDa protein                                                    | 276           | 50326        | 15.4                 |                 |              |                     |               |                 |
| 7           | 37                   | IPI00024095 | ANXA3       | Annexin A3                                                        | 126           | 36393        | 12.4                 | 3               | 3            | 3                   | 2.2           | 0.6             |
|             |                      | IPI00745868 | ANXA3       | 36 kDa protein                                                    | 126           | 36623        | 12.4                 |                 |              |                     |               |                 |
| 1           | 1                    | IPI00289334 | FLNB        | Isoform 1 of Filamin-B                                            | 1234          | 280188       | 12.5                 | 27              | 58           | 3                   | 2.1           | 0.2             |
|             |                      | IPI00382696 | FLNB        | Isoform 2 of Filamin-B                                            | 1234          | 277637       | 12.6                 |                 |              |                     |               |                 |
|             |                      | IPI00477536 | FLNB        | Filamin B                                                         | 1234          | 278875       | 12.6                 |                 |              |                     |               |                 |
| 2           | 16                   | IPI00002966 | HSPA4       | Heat shock 70 kDa protein 4                                       | 105           | 95096        | 1.5                  | 1               | 2            | 1                   | 2.1           | 0.0             |
| 4           | 29                   | IPI00290770 | CCT3        | chaperonin containing TCP1, subunit 3 isoform b                   | 76            | 60994        | 4.2                  | 2               | 2            | 2                   | 2.1           | 0.5             |
|             |                      | IPI00552715 | CCT3        | chaperonin containing TCP1, subunit 3 isoform c                   | 76            | 56908        | 4.5                  |                 |              |                     |               |                 |
|             |                      | IPI00553185 | CCT3        | T-complex protein 1 subunit gamma                                 | 76            | 61066        | 4.2                  |                 |              |                     |               |                 |
|             |                      | IPI00744315 | na          | 60 kDa protein                                                    | 76            | 60934        | 4.2                  |                 |              |                     |               |                 |
| 7           | 3                    | IPI00021439 | ACTB        | Actin, cytoplasmic 1                                              | 2124          | 42052        | 53.6                 | 16              | 91           | 2                   | 2.1           | 0.7             |
|             |                      | IPI00021440 | ACTG1       | Actin, cytoplasmic 2                                              | 2124          | 42108        | 53.6                 |                 |              |                     |               |                 |
| 2           | 6                    | IPI00291802 | LMO7*       | Isoform 3 of LIM domain only protein 7                            | 387           | 154616       | 6.2                  | 7               | 21           | 3                   | 2.1           | 0.6             |
|             |                      | IPI00409590 | LMO7*       | Isoform 1 of LIM domain only protein 7                            | 387           | 194016       | 4.9                  |                 |              |                     |               |                 |
|             |                      | IPI00409591 | LMO7*       | Isoform 2 of LIM domain only protein 7                            | 387           | 191799       | 5                    |                 |              |                     |               |                 |
|             |                      | IPI00409593 | LMO7*       | Isoform 4 of LIM domain only protein 7                            | 387           | 186028       | 5.1                  |                 |              |                     |               |                 |
| 2           | 9                    | IPI00012837 | KIF5B       | Kinesin heavy chain                                               | 265           | 110358       | 8.7                  | 7               | 14           | 4                   | 2.1           | 0.7             |
|             |                      | IPI00472558 | KIF5B       | 110 kDa protein                                                   | 265           | 110331       | 8.4                  |                 |              |                     |               |                 |
| 7           | 60                   | IPI00008986 | SLC7A5      | Large neutral amino acids transporter small subunit 1             | 40            | 55659        | 3.6                  | 1               | 2            | 1                   | 2.1           | 0.0             |
| 4           | 12                   | IPI00554648 | KRT8        | Keratin, type II cytoskeletal 8                                   | 292           | 53540        | 16.1                 | 8               | 19           | 2                   | 2.0           | 0.7             |
| 4           | 54                   | IPI00021692 | MBNL1       | Isoform EXP42 of Muscleblind-like protein                         | 29            | 42531        | 2.1                  | 1               | 1            | 1                   | 2.0           | 0.0             |
|             |                      | IPI00178116 | MBNL1       | muscleblind-like 1 isoform e                                      | 29            | 34987        | 2.5                  |                 |              |                     |               |                 |
|             |                      | IPI00218263 | MBNL1       | Isoform EXP40 of Muscleblind-like protein                         | 29            | 40546        | 2.2                  |                 |              |                     |               |                 |
|             |                      | IPI00384261 | MBNL1       | Muscleblind-like protein EXP40s                                   | 29            | 37951        | 2.3                  |                 |              |                     |               |                 |
|             |                      | IPI00395357 | MBNL1       | muscleblind-like 1 isoform a                                      | 29            | 41764        | 2.1                  |                 |              |                     |               |                 |
|             |                      | IPI00410205 | MBNL1       | Isoform EXP35 of Muscleblind-like protein                         | 29            | 33770        | 2.6                  |                 |              |                     |               |                 |
|             |                      | IPI00410279 | MBNL1       | muscleblind-like 1 isoform g                                      | 29            | 37905        | 2.3                  |                 |              |                     |               |                 |
| 5           | 18                   | IPI00217223 | PAICS       | Multifunctional protein ADE2                                      | 100           | 50389        | 2.7                  | 1               | 2            | 1                   | 2.0           | 0.0             |
| 7           | 18                   | IPI00216319 | YWHAH       | 14-3-3 protein eta                                                | 723           | 28241        | 16.3                 | 4               | 21           | 1                   | 2.0           | 0.0             |
| 4           | 31                   | IPI00005859 | KRT75       | Cytokeratin type II                                               | 62            | 59753        | 4.8                  | 2               | 3            | 1                   | 1.9           | 0.0             |
| 3           | 9                    | IPI00152418 | CD55        | Decay-accelerating factor splicing variant 4                      | 48            | 57209        | 3.2                  | 2               | 4            | 2                   | 1.8           | 0.4             |
|             |                      | IPI00216550 | CD55        | Isoform 1 of Complement decay-accelerating factor precursor       | 48            | 49713        | 3.9                  |                 |              |                     |               |                 |
|             |                      | IPI00292069 | CD55        | Isoform 2 of Complement decay-accelerating factor precursor       | 48            | 42400        | 4.5                  |                 |              |                     |               |                 |
|             |                      | IPI00382926 | CD55        | Decay-accelerating factor splicing variant 5                      | 48            | 60027        | 3.1                  |                 |              |                     |               |                 |
|             |                      | IPI00647119 | CD55        | Decay accelerating factor for complement                          | 48            | 39922        | 4.7                  |                 |              |                     |               |                 |
|             |                      | IPI00783145 | CD55        | Decay-accelerating factor splicing variant 3                      | 48            | 42899        | 4.4                  |                 |              |                     |               |                 |
|             |                      | IPI00784169 | CD55        | Decay-accelerating factor splicing variant 1                      | 48            | 49566        | 3.9                  |                 |              |                     |               |                 |
| 5           | 11                   | IPI00171176 | PANK2       | Isoform 1 of Pantothenate kinase 2, mitochondrial precursor       | 180           | 63282        | 3.5                  | 1               | 3            | 1                   | 1.8           | 0.0             |
|             |                      | IPI00556350 | PANK2       | pantothenate kinase 2 isoform 1 preproprotein                     | 180           | 63268        | 4.5                  |                 |              |                     |               |                 |
| 1           | 9                    | IPI00456969 | DYNCH1      | Dynein heavy chain, cytosolic                                     | 36            | 534809       | 0.8                  | 1               | 3            | 2                   | 1.7           | 0.5             |
|             |                      | IPI00477531 | na          | 532 kDa protein                                                   | 36            | 534768       | 0.7                  |                 |              |                     |               |                 |
| 6           | 23                   | IPI00012011 | CFL1        | Cofilin-1                                                         | 74            | 18588        | 15.1                 | 2               | 7            | 2                   | 1.7           | 0.4             |
|             |                      | IPI00784459 | CFL1        | Cofilin-1                                                         | 74            | 24424        | 11.3                 |                 |              |                     |               |                 |
| 6           | 20                   | IPI00221089 | RPS13       | 40S ribosomal protein S13                                         | 86            | 17081        | 11.3                 | 2               | 3            | 2                   | 1.7           | 1.0             |
| 4           | 14                   | IPI00027497 | GPI         | Glucose-6-phosphate isomerase                                     | 222           | 63204        | 2.7                  | 1               | 4            | 1                   | 1.7           | 1.0             |
| 2           | 8                    | IPI00167909 | EMIL*       | echinoderm microtubule associated protein like 3                  | 278           | 96221        | 8.8                  | 7               | 11           | 4                   | 1.6           | 0.2             |
| 4           | 38                   | IPI00026270 | CPM         | Carboxypeptidase M precursor                                      | 41            | 50938        | 2.9                  | 1               | 1            | 1                   | 1.6           | 0.0             |
| 4           | 25                   | IPI00168408 | WDR20*      | WDR20 protein                                                     | 110           | 22419        | 7.7                  | 1               | 2            | 1                   | 1.5           | 0.0             |
|             |                      | IPI00290950 | WDR20*      | Hypothetical protein DKFZp686P0251                                | 110           | 64858        | 2.6                  |                 |              |                     |               |                 |
|             |                      | IPI00329787 | WDR20*      | WD repeat domain 20 isoform 3                                     | 110           | 56971        | 3                    |                 |              |                     |               |                 |
|             |                      | IPI00377221 | WDR20*      | WD repeat domain 20 isoform 1                                     | 110           | 64663        | 2.6                  |                 |              |                     |               |                 |
| 5           | 17                   | IPI00441498 | FOLR1       | Folate receptor alpha precursor                                   | 102           | 30712        | 7.4                  | 2               | 4            | 2                   | 1.5           | 1.0             |
| 3           | 15                   | IPI00168421 | FBXO15      | F-box protein 15                                                  | 32            | 58077        | 2.2                  | 1               | 1            | 1                   | 1.5           | 0.0             |
|             |                      | IPI00643350 | FBXO15      | 20 kDa protein                                                    | 32            | 20627        | 6.1                  |                 |              |                     |               |                 |
| 7           | 61                   | IPI00219678 | EIF2S1      | Eukaryotic translation initiation factor 2 subunit 1              | 39            | 36243        | 3.8                  | 1               | 1            | 1                   | 1.5           | 0.0             |
| 6           | 46                   | IPI00019329 | DYNLL1      | Dynein light chain 1, cytoplasmic                                 | 35            | 10530        | 12.4                 | 1               | 2            | 1                   | 1.5           | 0.0             |
|             |                      | IPI00062037 | DYNLL2      | Dynein light chain 2, cytoplasmic                                 | 35            | 10457        | 12.4                 |                 |              |                     |               |                 |
| 4           | 53                   | IPI00023673 | LGALS3BP    | Galectin-3-binding protein precursor                              | 30            | 66202        | 3.9                  | 2               | 2            | 2                   | 1.5           | 0.0             |
| 5           | 12                   | IPI00013678 | RPL4        | 60S ribosomal protein L4                                          | 151           | 47821        | 5.2                  | 1               | 3            | 1                   | 1.5           | 0.0             |
| 6           | 45                   | IPI00013679 | DUT*        | Isoform DUT-M of Deoxyuridine 5'-triphosphate nucleotidohydrolase | 35            | 26355        | 3.2                  | 1               | 1            | 1                   | 1.4           | 0.0             |
|             |                      | IPI00375015 | DUT*        | Isoform DUT-M of Deoxyuridine 5'-triphosphate nucleotidohydrolase | 35            | 17908        | 4.9                  |                 |              |                     |               |                 |
|             |                      | IPI00749113 | DUT*        | dUTP pyrophosphatase isoform 1 precursor                          | 35            | 26832        | 3.2                  |                 |              |                     |               |                 |
| 5           | 4                    | IPI00554788 | KRT18       | 49 kDa protein                                                    | 428           | 48793        | 27.2                 | 13              | 30           | 3                   | 1.4           | 0.5             |
|             |                      | IPI00784347 | KRT18       | Keratin, type I cytoskeletal 18                                   | 428           | 47897        | 26.9                 |                 |              |                     |               |                 |
| 6           | 53                   | IPI00008293 | LOC149224   | PREDICTED: similar to 40S ribosomal protein S7                    | 33            | 21879        | 4.1                  | 1               | 2            | 1                   | 1.4           | 0.0             |
|             |                      | IPI00478287 | na          | 22 kDa protein                                                    | 33            | 22099        | 4.1                  |                 |              |                     |               |                 |
|             |                      | IPI00783203 | na          | Similar to 40S ribosomal protein S7                               | 33            | 12956        | 6.8                  |                 |              |                     |               |                 |
|             |                      | IPI00013415 | RPS7        | 40S ribosomal protein S7                                          | 33            | 22113        | 4.1                  |                 |              |                     |               |                 |
| 7           | 20                   | IPI00013890 | SFN         | 14-3-3 protein sigma                                              | 666           | 27871        | 16.1                 | 4               | 20           | 1                   | 1.4           | 0.0             |
|             |                      | IPI00411765 | SFN         | SFN protein                                                       | 666           | 24378        | 18.5                 |                 |              |                     |               |                 |
| 6           | 8                    | IPI00216298 | TXN         | Thioredoxin                                                       | 231           | 11884        | 21                   | 2               | 7            | 2                   | 1.4           | 0.1             |
|             |                      | IPI00552768 | TXN         | Thioredoxin                                                       | 231           | 9674         | 25.9                 |                 |              |                     |               |                 |
| 2           | 35                   | IPI00026216 | NPEPPS      | Putrocyte-sensitive aminopeptidase                                | 31            | 103895       | 1.4                  | 1               | 1            | 1                   | 1.3           | 0.0             |
| 3           | 5                    | IPI00003865 | HSPA8       | Isoform 1 of Heat shock cognate 71 kDa protein                    | 161           | 71082        | 5.1                  | 4               | 11           | 1                   | 1.3           | 0.0             |
| 4           | 28                   | IPI00216008 | G6PD        | Isoform Long of Glucose-6-phosphate 1-dehydrogenase               | 77            | 64177        | 2.9                  | 1               | 2            | 1                   | 1.3           | 0.0             |
|             |                      | IPI00289800 | G6PD        | Glucose-6-phosphate dehydrogenase isoform b                       | 77            | 59675        | 3.1                  |                 |              |                     |               |                 |
|             |                      | IPI00642620 | G6PD        | Glucose-6-phosphate dehydrogenase                                 | 77            | 29655        | 6.2                  |                 |              |                     |               |                 |
|             |                      | IPI00643089 | G6PD        | 33 kDa protein                                                    | 77            | 33123        | 5.3                  |                 |              |                     |               |                 |
|             |                      | IPI00645745 | G6PD        | 37 kDa protein                                                    | 77            | 36805        | 5                    |                 |              |                     |               |                 |

| band number | protein match number | accession   | gene symbol | protein description                                    | protein score | protein mass | protein coverage (%) | unique peptides | MSMS matches | quantified peptides | average ratio | deviation ratio |
|-------------|----------------------|-------------|-------------|--------------------------------------------------------|---------------|--------------|----------------------|-----------------|--------------|---------------------|---------------|-----------------|
|             |                      | IPI00760751 | G6PD        | glucose-6-phosphate dehydrogenase isoform a            | 77            | 62942        | 2.8                  |                 |              |                     |               |                 |
| 3           | 2                    | IPI00304925 | HSPA1A      | Heat shock 70 kDa protein 1                            | 177           | 70294        | 10.1                 | 8               | 15           | 2                   | 1.3           | 0.3             |
|             |                      | IPI00514377 | HSPA1A      | heat shock 70kDa protein 1A                            | 177           | 70280        | 10.2                 |                 |              |                     |               |                 |
|             |                      | IPI00643932 | HSPA1B      | heat shock 70kDa protein 1B                            | 177           | 70267        | 10.2                 |                 |              |                     |               |                 |
| 5           | 8                    | IPI00301058 | VASP        | Vasodilator-stimulated phosphoprotein                  | 191           | 39845        | 20.8                 | 6               | 10           | 4                   | 1.3           | 0.3             |
| 7           | 33                   | IPI00328218 | LSR*        | Isoform 2 of Lipolysis-stimulated lipoprotein receptor | 135           | 66672        | 6.3                  | 3               | 7            | 3                   | 1.2           | 0.0             |
|             |                      | IPI00409640 | LSR*        | Isoform 1 of Lipolysis-stimulated lipoprotein receptor | 135           | 72577        | 5.7                  |                 |              |                     |               |                 |
|             |                      | IPI00409641 | LSR*        | LISCH protein isoform 3                                | 135           | 64356        | 6.4                  |                 |              |                     |               |                 |
|             |                      | IPI00641540 | LSR*        | LISCH protein isoform 1                                | 135           | 70654        | 5.9                  |                 |              |                     |               |                 |
| 7           | 39                   | IPI00022284 | PRNP        | Major prion protein precursor                          | 104           | 27871        | 4.7                  | 1               | 2            | 1                   | 1.1           | 0.0             |
|             |                      | IPI00382843 | PRNP        | Prion protein                                          | 104           | 30977        | 4.2                  |                 |              |                     |               |                 |
| 4           | 27                   | IPI00028359 | SH3BP5L     | Hypothetical protein DKFZp761F0123                     | 94            | 43701        | 13.5                 | 4               | 5            | 3                   | 1.0           | 0.1             |
| 2           | 20                   | IPI00022774 | VCP         | Transitional endoplasmic reticulum ATPase              | 60            | 89819        | 3.2                  | 2               | 2            | 2                   | 0.3           | 0.0             |
|             |                      | IPI00478540 | VCP         | 89 kDa protein                                         | 60            | 90012        | 3.2                  |                 |              |                     |               |                 |
| 2           | 29                   | IPI00556645 | FOXK1*      | forkhead box K1                                        | 38            | 75867        | 1.1                  | 1               | 2            | 1                   | 0.3           | 0.0             |
| 5           | 40                   | IPI00002142 | PCDH10      | Protocadherin-10 precursor                             | 30            | 114234       | 0.8                  | 1               | 1            | 1                   | 0.2           | 0.0             |
|             |                      | IPI00010826 | PCDH10      | protocadherin 10 isoform 2 precursor                   | 30            | 98082        | 0.8                  |                 |              |                     |               |                 |



| Supplementary table 2 (also see legend to supplementary table 3) |                                                                                                                                                                   |                                                                                                                                                                                                                                                                                                                                                                                                              |                                                                                                                                                                                                                                                                                                                                                                                                                                                                                                                              |                                                                                                                                                                                                                                                                              |                                                                                                                                                                       |                                                                                   |                                                                                                                                                                                  |                                                                                                                                                       |                                                                                    |                                                                                                                                                                   |  |
|------------------------------------------------------------------|-------------------------------------------------------------------------------------------------------------------------------------------------------------------|--------------------------------------------------------------------------------------------------------------------------------------------------------------------------------------------------------------------------------------------------------------------------------------------------------------------------------------------------------------------------------------------------------------|------------------------------------------------------------------------------------------------------------------------------------------------------------------------------------------------------------------------------------------------------------------------------------------------------------------------------------------------------------------------------------------------------------------------------------------------------------------------------------------------------------------------------|------------------------------------------------------------------------------------------------------------------------------------------------------------------------------------------------------------------------------------------------------------------------------|-----------------------------------------------------------------------------------------------------------------------------------------------------------------------|-----------------------------------------------------------------------------------|----------------------------------------------------------------------------------------------------------------------------------------------------------------------------------|-------------------------------------------------------------------------------------------------------------------------------------------------------|------------------------------------------------------------------------------------|-------------------------------------------------------------------------------------------------------------------------------------------------------------------|--|
| prot hit                                                         | prot acc                                                                                                                                                          | prot desc                                                                                                                                                                                                                                                                                                                                                                                                    | [peptide sequences identified by MS within square brackets] and extended as explained in Suppl table 3)                                                                                                                                                                                                                                                                                                                                                                                                                      | pep mod                                                                                                                                                                                                                                                                      | pep exp mz                                                                                                                                                            | pep exp z                                                                         | pep calc mr                                                                                                                                                                      | pep delta                                                                                                                                             | pep score                                                                          | pep expect                                                                                                                                                        |  |
| 1                                                                | IP00009526                                                                                                                                                        | 65 kDa Yes-associated protein                                                                                                                                                                                                                                                                                                                                                                                | KSHSK[QASIDAGTAGALPQHV]R<br>PPEPK[SILRQASDAGTAGALPQHV]R<br>IVHVR[GDETDLEALFNANMNPK]<br>QVVRPQELALR[SQLPLEODGGTQNPVSPGmsQELR]<br>AGALTPQHV[R]AHSSPAaLQLGAVSPGTLPTGVVSGPAATPTA[QHLR]<br>AGALTPQHV[R]AHSSPAaLQLGAVSPGTLPTGVVSGPAATPTA[QHLR]<br>DKPEKLYSPK[RIDFTVPVSPAPSR] and DKPEKLYSPK[RIDFTVPVSPAPSR]<br>DKPEKLYSPK[RIDFTVPVSPAPSR]<br>APSPTRFGK[MFVSSGSLPPVPSR]<br>DKPEKLYSPK[RIDFTVPVSPAPSR]<br>DKPEKLYSPK[RIDFTVPVSPAPSR]<br>DKPEKLYSPK[RIDFTVPVSPAPSR]<br>SGLSSDPLAK[GSATAEPAVCSNSSLFDLMDLSPK]<br>RRNSTTMSRH[LEGLDmVNR]E | Phospho (ST)<br>2 Phospho (ST)<br>Phospho (ST)<br>Phospho (ST)<br>2 Phospho (ST)<br>Phospho (ST)<br>2 Phospho (ST)<br>Phospho (ST)<br>1 Phospho (ST)<br>1 Phospho (ST)                                                                                                       | 930.935<br>803.355<br>1023.936<br>946.099<br>3613.825<br>1205.617<br>1222.265<br>860.922<br>900.905<br>911.433<br>704.359<br>1095.510<br>976.40907<br>978.32241       | 2<br>3<br>3<br>3<br>3<br>3<br>3<br>2<br>2<br>2                                    | 1859.853<br>2407.043<br>2045.865<br>2835.275<br>21<br>3<br>3693.792<br>1719.835<br>1799.801<br>1820.853<br>2109.041<br>2189.007<br>2026.207184<br>1494.617386                    | 0.003<br>-0.001<br>-0.008<br>0.000<br>0.003<br>-0.019<br>-0.006<br>-0.005<br>-0.002<br>1.014<br>-0.001<br>-0.001091<br>0.012882                       | 100<br>45<br>86<br>21<br>110<br>33<br>83<br>75<br>44<br>52<br>52<br>32.58<br>48.55 | 1.40E-08<br>0.0048<br>2.70E-07<br>1.3<br>9.50E-10<br>0.065<br>6.90E-07<br>3.70E-06<br>0.0054<br>0.00081<br>0.0009<br>0.065<br>0.0012                              |  |
| 4                                                                | IP000749302                                                                                                                                                       | FAM122B                                                                                                                                                                                                                                                                                                                                                                                                      | DGLRR[AGQSDSLGTSGLSQSK]<br>DNDMFKDGLR[RAQSDSLGTSGLSQSK]<br>DNDMFKDGLR[RAQSDSLGTSGLSQSK]<br>NEEHLDSTR[GvHSLDAGLLPSGDPEFSK] and NEEHLDSTR[GvHSLDAGLLPSGDPEFSK]<br>RIVPI[PLSLLAGADAR]R<br>K[QF]TmSPTLSSITQGVLD[TSKIL]<br>STPGASPHHR[RVPLSLLAGADAR]<br>THCSR[HGSGNILLTGDSSGFEK]E                                                                                                                                                                                                                                                 | Phospho (ST)<br>Phospho (ST)<br>2 Phospho (ST)<br>Phospho (ST)<br>Phospho (ST)<br>Phospho (ST)<br>Phospho (ST)                                                                                                                                                               | 823.867<br>901.916<br>941.900<br>1038.996<br>828.940<br>1259.591<br>906.991<br>975.948                                                                                | 2<br>2<br>2<br>2<br>2<br>2<br>2                                                   | 1645.720<br>1801.821<br>1881.787<br>2075.993<br>1655.865<br>2517.171<br>1811.966<br>1949.888                                                                                     | -0.001<br>-0.002<br>-0.002<br>-0.016<br>0.001<br>-0.003<br>0.002<br>-0.007                                                                            | 111<br>99<br>33<br>37<br>85<br>42<br>78<br>69                                      | 8.30E-10<br>1.60E-08<br>0.052<br>0.031<br>3.20E-07<br>0.0099<br>1.00E-06<br>1.90E-05                                                                              |  |
| 5                                                                | IP000293009<br>IP000412712                                                                                                                                        | Isoform 1 of Rab GTPase-binding effector protein 1<br>Isoform 2 of Rab GTPase-binding effector protein 1                                                                                                                                                                                                                                                                                                     | DGLRR[AGQSDSLGTSGLSQSK]<br>DNDMFKDGLR[RAQSDSLGTSGLSQSK]<br>DNDMFKDGLR[RAQSDSLGTSGLSQSK]<br>NEEHLDSTR[GvHSLDAGLLPSGDPEFSK] and NEEHLDSTR[GvHSLDAGLLPSGDPEFSK]                                                                                                                                                                                                                                                                                                                                                                 | Phospho (ST)<br>Phospho (ST)<br>2 Phospho (ST)<br>Phospho (ST)                                                                                                                                                                                                               | 823.867<br>901.916<br>941.900<br>1038.996                                                                                                                             | 2<br>2<br>2<br>2                                                                  | 1645.720<br>1801.821<br>1881.787<br>2075.993                                                                                                                                     | -0.001<br>-0.002<br>-0.002<br>-0.016                                                                                                                  | 111<br>99<br>33<br>37                                                              | 8.30E-10<br>1.60E-08<br>0.052<br>0.031                                                                                                                            |  |
| 7                                                                | IP000639850<br>IP000375907<br>IP000783502                                                                                                                         | Transducer of regulated cAMP response element-binding protein<br>Hypothetical protein<br>CREB regulated transcription coactivator 2                                                                                                                                                                                                                                                                          | RIVPI[PLSLLAGADAR]R<br>K[QF]TmSPTLSSITQGVLD[TSKIL]<br>STPGASPHHR[RVPLSLLAGADAR]<br>THCSR[HGSGNILLTGDSSGFEK]E<br>RLGLR[KIGSYGALAEHTASK] and RLGLR[KIGSYGALAE]<br>RSRQAQRSR[SCQVTLTDLQEAKE]<br>LAYVAPTPR[RLASTDIEKENR]<br>ARQSR[RSIQVTLTDL]<br>QVSR[GLASTMDLSSSS]<br>NMKR[AAALNYLNOPSAALPQVSR]<br>EPRPSSNMK[RAALNYLNOPSAALPQVSR]<br>KYDHNHVG[TSKQPAQSNLPSGFSR]<br>GAYWNGKLLR[SHSQASLAGPVPVPSNR]<br>DPSNR[SNsmLEAPK]V<br>SNMML[ELAPK]V[ASPGSTTIDTAPLSSVDSL]NK                                                                   | Phospho (ST)<br>Phospho (ST) | 828.940<br>1259.591<br>906.991<br>975.948<br>788.890<br>850.392<br>864.400<br>928.444<br>661.758<br>1040.515<br>1118.571<br>898.919<br>928.917<br>593.269<br>1126.553 | 2<br>2<br>2<br>2<br>2<br>2<br>2<br>2<br>2<br>2<br>2<br>2<br>2<br>2<br>2<br>2<br>2 | 1655.865<br>2517.171<br>1811.966<br>1949.888<br>1575.755<br>1698.771<br>1726.789<br>1854.872<br>1321.511<br>2079.015<br>2235.116<br>1795.825<br>1855.821<br>1184.515<br>2251.098 | 0.001<br>-0.003<br>0.002<br>-0.007<br>0.011<br>-0.002<br>-0.003<br>0.002<br>-0.010<br>0.000<br>0.011<br>-0.001<br>-0.001<br>0.009<br>-0.002<br>-0.007 | 78<br>51<br>57<br>78<br>34<br>118<br>71<br>67<br>101<br>42<br>77                   | 3.20E-07<br>0.0099<br>1.00E-06<br>1.90E-05<br>0.0011<br>0.031<br>0.0029<br>2.10E-06<br>0.016<br>2.20E-10<br>9.50E-10<br>2.60E-05<br>9.60E-09<br>0.005<br>2.80E-06 |  |
| 8                                                                | IP000183002<br>IP000397728<br>IP000397730<br>IP000413191                                                                                                          | Isoform 1 of Protein phosphatase 1 regulatory subunit 12A<br>Isoform 2 of Protein phosphatase 1 regulatory subunit 12A<br>Isoform 4 of Protein phosphatase 1 regulatory subunit 12A<br>Isoform 3 of Protein phosphatase 1 regulatory subunit 12A                                                                                                                                                             | RLGLR[KIGSYGALAEHTASK] and RLGLR[KIGSYGALAE]<br>RSRQAQRSR[SCQVTLTDLQEAKE]<br>LAYVAPTPR[RLASTDIEKENR]<br>ARQSR[RSIQVTLTDL]<br>QVSR[GLASTMDLSSSS]<br>NMKR[AAALNYLNOPSAALPQVSR]<br>EPRPSSNMK[RAALNYLNOPSAALPQVSR]<br>KYDHNHVG[TSKQPAQSNLPSGFSR]<br>GAYWNGKLLR[SHSQASLAGPVPVPSNR]<br>DPSNR[SNsmLEAPK]V<br>SNMML[ELAPK]V[ASPGSTTIDTAPLSSVDSL]NK                                                                                                                                                                                   | Phospho (ST)<br>Phospho (ST)                                                                                                 | 788.890<br>850.392<br>864.400<br>928.444<br>661.758<br>1040.515<br>1118.571<br>898.919<br>928.917<br>593.269<br>1126.553                                              | 2<br>2<br>2<br>2<br>2<br>2<br>2<br>2<br>2<br>2<br>2                               | 1575.755<br>1698.771<br>1726.789<br>1854.872<br>1321.511<br>2079.015<br>2235.116<br>1795.825<br>1855.821<br>1184.515<br>2251.098                                                 | 0.011<br>-0.002<br>-0.003<br>0.002<br>-0.010<br>0.000<br>0.011<br>-0.001<br>-0.002<br>0.009<br>-0.007                                                 | 51<br>36<br>57<br>78<br>34<br>118<br>71<br>67<br>101<br>42<br>77                   | 0.0011<br>0.031<br>0.0029<br>2.10E-06<br>0.016<br>2.20E-10<br>9.50E-10<br>2.60E-05<br>9.60E-09<br>0.005<br>2.80E-06                                               |  |
| 9                                                                | IP000398812<br>IP000743879                                                                                                                                        | Kinesin light chain 4<br>kinesin-like 8 isoform b                                                                                                                                                                                                                                                                                                                                                            | QVSR[GLASTMDLSSSS]<br>NMKR[AAALNYLNOPSAALPQVSR]<br>EPRPSSNMK[RAALNYLNOPSAALPQVSR]<br>KYDHNHVG[TSKQPAQSNLPSGFSR]<br>GAYWNGKLLR[SHSQASLAGPVPVPSNR]<br>DPSNR[SNsmLEAPK]V<br>SNMML[ELAPK]V[ASPGSTTIDTAPLSSVDSL]NK                                                                                                                                                                                                                                                                                                                | Phospho (ST)<br>Phospho (ST)<br>Phospho (ST)<br>Phospho (ST)<br>Phospho (ST)<br>Phospho (ST)<br>Phospho (ST)                                                                                                                                                                 | 661.758<br>1040.515<br>1118.571<br>898.919<br>928.917<br>593.269<br>1126.553                                                                                          | 2<br>2<br>2<br>2<br>2<br>2<br>2                                                   | 1321.511<br>2079.015<br>2235.116<br>1795.825<br>1855.821<br>1184.515<br>2251.098                                                                                                 | -0.010<br>0.000<br>0.011<br>-0.001<br>-0.002<br>0.009<br>-0.007                                                                                       | 34<br>118<br>71<br>67<br>101<br>42<br>77                                           | 0.016<br>2.20E-10<br>9.50E-10<br>2.60E-05<br>9.60E-09<br>0.005<br>2.80E-06                                                                                        |  |
| 10                                                               | IP000218136<br>IP000515042                                                                                                                                        | 137 kDa protein<br>cingulin                                                                                                                                                                                                                                                                                                                                                                                  | SNMML[ELAPK]V[ASPGSTTIDTAPLSSVDSL]NK<br>KLSRK[ALSNLTV]DAPR<br>SERPQR[LRK]AS[AN]VVR<br>AGPAPATPSR[TPALSPASSLDV]<br>GKDasIFQWR[VLGAGGAGPAPATPrR]<br>GKDasIFQWR[VLGAGGAGPAPATPSR]TPALSPASSLDV                                                                                                                                                                                                                                                                                                                                   | Phospho (ST)<br>Phospho (ST)<br>Phospho (ST)<br>Phospho (ST)<br>Phospho (ST)<br>Phospho (ST)                                                                                                                                                                                 | 1126.553<br>562.296<br>626.345<br>627.281<br>729.865<br>1307.148                                                                                                      | 2<br>2<br>2<br>2<br>2<br>2                                                        | 2251.098<br>1122.580<br>1250.675<br>1252.559<br>1457.703<br>2612.285                                                                                                             | -0.007<br>-0.002<br>0.002<br>-0.010<br>0.012<br>-0.002                                                                                                | 77<br>76<br>98<br>28<br>79<br>51                                                   | 2.80E-06<br>9.00E-06<br>1.30E-08<br>0.14<br>1.70E-06<br>0.0012                                                                                                    |  |
| 11                                                               | IP000386808<br>IP000418456<br>IP000386808<br>IP000743474<br>IP000749076                                                                                           | HDAC7A protein<br>Histone deacetylase<br>HDAC7A protein<br>Isoform 1 of Histone deacetylase 7a<br>Isoform 3 of Histone deacetylase 7a                                                                                                                                                                                                                                                                        | TPAR[HLPTTGLTYBVMLEK]<br>PLSR[QSPADLPLPSSPMSAR]<br>AKPSEKRLR[QIPAEDELTDGGGGQVDDGLEHR]<br>PLSR[TRLEPLPSTATAPPPGmQPR]                                                                                                                                                                                                                                                                                                                                                                                                          | Phospho (ST)<br>Phospho (ST)<br>Phospho (ST)<br>Phospho (ST)                                                                                                                                                                                                                 | 1307.148<br>1080.447<br>1037.485<br>924.413<br>793.043                                                                                                                | 2<br>2<br>2<br>2                                                                  | 2612.285<br>1957.891<br>2082.953<br>2270.208<br>2376.130                                                                                                                         | -0.002<br>0.988<br>0.002<br>0.008<br>-0.021                                                                                                           | 51<br>29<br>132<br>46<br>46                                                        | 0.0012<br>0.9<br>8.9E-12<br>7.20E-05<br>0.0037                                                                                                                    |  |
| 12                                                               | IP000167909                                                                                                                                                       | echinoderm microtubule associated protein like 3                                                                                                                                                                                                                                                                                                                                                             | RRNSTTMSRH[LEGLDmVNR]E<br>NDVEKSASP[KRIDFTVPVSPAPSR] and NDVEKSASP[KRIDFTVPVSPAPSR]<br>NDVEKSASP[KRIDFTVPVSPAPSR]<br>GSGGGGLR[SNAPLHGLSDTSPVQAEAPSR]<br>GGGLR[RSNSAPLHGLSDTSPVQAEAPSR]<br>AGMKR[AMNLTNLV]DAPR<br>EAAAGAACMK[RAMLNTLV]DAPR<br>SPRR[DSLALPSEEEER]<br>K[IN]LALRESL[V]<br>R[GPAL]TRIDEEVGGHSPRJS<br>RRP[AR]VDALDDLTPPSTAESGSR<br>SMRVLYMEK[ELANFAPRGP]GVRER<br>EDDWRSRPSR[GPAL]TRIDEEVGGHSPRJS<br>RARRP[AR]VDALDDLTPPSTAESGSRSP[SN]GGRJS                                                                         | Phospho (ST)<br>Phospho (ST)<br>2 Phospho (ST)<br>Phospho (ST)                               | 620.337<br>866.943<br>906.923<br>878.084<br>930.116<br>741.350<br>819.394<br>922.903<br>640.835<br>1027.971<br>1113.004<br>747.671<br>825.704<br>1021.112             | 2<br>2<br>2<br>2<br>2<br>2<br>2<br>2<br>2<br>2<br>2<br>2<br>2<br>2<br>2           | 1238.654<br>1731.871<br>1811.837<br>2631.233<br>2787.334<br>1480.675<br>1636.776<br>1843.799<br>1279.654<br>2053.937<br>2224.001<br>2239.978<br>2474.089<br>3060.319             | 0.005<br>0.000<br>-0.006<br>-0.004<br>-0.006<br>0.010<br>-0.003<br>-0.007<br>0.001<br>-0.010<br>-0.008<br>0.012<br>0.001<br>-0.003                    | 55<br>59<br>74<br>68<br>76<br>78<br>78<br>69<br>61<br>64<br>102<br>22<br>28<br>31  | 0.00026<br>0.00014<br>5.50E-06<br>2.80E-05<br>4.70E-06<br>1.70E-06<br>1.30E-08<br>1.40E-05<br>8.80E-05<br>5.90E-05<br>1.10E-08<br>0.98<br>0.24<br>0.13            |  |
| 13                                                               | IP000386808<br>IP000409641<br>IP00041640                                                                                                                          | HDAC7A protein<br>Isoform 1 of Histone deacetylase 7a<br>Isoform 3 of Histone deacetylase 7a                                                                                                                                                                                                                                                                                                                 | TPAR[HLPTTGLTYBVMLEK]<br>PLSR[QSPADLPLPSSPMSAR]<br>AKPSEKRLR[QIPAEDELTDGGGGQVDDGLEHR]<br>PLSR[TRLEPLPSTATAPPPGmQPR]                                                                                                                                                                                                                                                                                                                                                                                                          | Phospho (ST)<br>Phospho (ST)<br>Phospho (ST)<br>Phospho (ST)                                                                                                                                                                                                                 | 1307.148<br>1080.447<br>1037.485<br>924.413<br>793.043                                                                                                                | 2<br>2<br>2<br>2                                                                  | 2612.285<br>1957.891<br>2082.953<br>2270.208<br>2376.130                                                                                                                         | -0.002<br>0.988<br>0.002<br>0.008<br>-0.021                                                                                                           | 51<br>29<br>132<br>46<br>46                                                        | 0.0012<br>0.9<br>8.9E-12<br>7.20E-05<br>0.0037                                                                                                                    |  |
| 14                                                               | IP00061087                                                                                                                                                        | Protein FAM122A                                                                                                                                                                                                                                                                                                                                                                                              | RRNSTTMSRH[LEGLDmVNR]E<br>NDVEKSASP[KRIDFTVPVSPAPSR] and NDVEKSASP[KRIDFTVPVSPAPSR]<br>NDVEKSASP[KRIDFTVPVSPAPSR]<br>GSGGGGLR[SNAPLHGLSDTSPVQAEAPSR]<br>GGGLR[RSNSAPLHGLSDTSPVQAEAPSR]<br>AGMKR[AMNLTNLV]DAPR<br>EAAAGAACMK[RAMLNTLV]DAPR<br>SPRR[DSLALPSEEEER]<br>K[IN]LALRESL[V]<br>R[GPAL]TRIDEEVGGHSPRJS<br>RRP[AR]VDALDDLTPPSTAESGSR<br>SMRVLYMEK[ELANFAPRGP]GVRER<br>EDDWRSRPSR[GPAL]TRIDEEVGGHSPRJS<br>RARRP[AR]VDALDDLTPPSTAESGSRSP[SN]GGRJS                                                                         | Phospho (ST)<br>Phospho (ST)<br>2 Phospho (ST)<br>Phospho (ST)                               | 620.337<br>866.943<br>906.923<br>878.084<br>930.116<br>741.350<br>819.394<br>922.903<br>640.835<br>1027.971<br>1113.004<br>747.671<br>825.704<br>1021.112             | 2<br>2<br>2<br>2<br>2<br>2<br>2<br>2<br>2<br>2<br>2<br>2<br>2<br>2<br>2           | 1238.654<br>1731.871<br>1811.837<br>2631.233<br>2787.334<br>1480.675<br>1636.776<br>1843.799<br>1279.654<br>2053.937<br>2224.001<br>2239.978<br>2474.089<br>3060.319             | 0.005<br>0.000<br>-0.006<br>-0.004<br>-0.006<br>0.010<br>-0.003<br>-0.007<br>0.001<br>-0.010<br>-0.008<br>0.012<br>0.001<br>-0.003                    | 55<br>59<br>74<br>68<br>76<br>78<br>78<br>69<br>61<br>64<br>102<br>22<br>28<br>31  | 0.00026<br>0.00014<br>5.50E-06<br>2.80E-05<br>4.70E-06<br>1.70E-06<br>1.30E-08<br>1.40E-05<br>8.80E-05<br>5.90E-05<br>1.10E-08<br>0.98<br>0.24<br>0.13            |  |
| 15                                                               | IP000465074<br>IP000478456<br>IP000736469                                                                                                                         | Isoform 3 of Kinesin light chain 3<br>Isoform 1 of Kinesin light chain 3<br>Isoform 2 of Kinesin light chain 3                                                                                                                                                                                                                                                                                               | AGMKR[AMNLTNLV]DAPR<br>EAAAGAACMK[RAMLNTLV]DAPR<br>SPRR[DSLALPSEEEER]<br>K[IN]LALRESL[V]<br>R[GPAL]TRIDEEVGGHSPRJS<br>RRP[AR]VDALDDLTPPSTAESGSR<br>SMRVLYMEK[ELANFAPRGP]GVRER<br>EDDWRSRPSR[GPAL]TRIDEEVGGHSPRJS<br>RARRP[AR]VDALDDLTPPSTAESGSRSP[SN]GGRJS                                                                                                                                                                                                                                                                   | Phospho (ST)<br>Phospho (ST)<br>Phospho (ST)<br>Phospho (ST)<br>Phospho (ST)<br>Phospho (ST)<br>Phospho (ST)<br>Phospho (ST)<br>Phospho (ST)<br>Phospho (ST)                                                                                                                 | 741.350<br>819.394<br>922.903<br>640.835<br>1027.971<br>1113.004<br>747.671<br>825.704<br>1021.112                                                                    | 2<br>2<br>2<br>2<br>2<br>2<br>2<br>2<br>2                                         | 1480.675<br>1636.776<br>1843.799<br>1279.654<br>2053.937<br>2224.001<br>2239.978<br>2474.089<br>3060.319                                                                         | 0.010<br>-0.003<br>-0.007<br>0.001<br>-0.010<br>-0.008<br>0.012<br>0.001<br>-0.003                                                                    | 78<br>30<br>69<br>61<br>64<br>102<br>22<br>28<br>31                                | 1.70E-06<br>1.30E-08<br>1.40E-05<br>8.80E-05<br>5.90E-05<br>1.10E-08<br>0.98<br>0.24<br>0.13                                                                      |  |
| 17                                                               | IP000328218<br>IP000409640<br>IP000409641<br>IP00041640                                                                                                           | Isoform 2 of Lipolysis-stimulated lipoprotein receptor<br>Isoform 1 of Lipolysis-stimulated lipoprotein receptor<br>LISCH protein isoform 3<br>LISCH protein isoform 1                                                                                                                                                                                                                                       | K[IN]LALRESL[V]<br>R[GPAL]TRIDEEVGGHSPRJS<br>RRP[AR]VDALDDLTPPSTAESGSR<br>SMRVLYMEK[ELANFAPRGP]GVRER<br>EDDWRSRPSR[GPAL]TRIDEEVGGHSPRJS<br>RARRP[AR]VDALDDLTPPSTAESGSRSP[SN]GGRJS                                                                                                                                                                                                                                                                                                                                            | Phospho (ST)<br>Phospho (ST)<br>Phospho (ST)<br>Phospho (ST)<br>Phospho (ST)<br>Phospho (ST)                                                                                                                                                                                 | 640.835<br>1027.971<br>1113.004<br>747.671<br>825.704<br>1021.112                                                                                                     | 2<br>2<br>2<br>2<br>2<br>2                                                        | 1279.654<br>2053.937<br>2224.001<br>2239.978<br>2474.089<br>3060.319                                                                                                             | 0.001<br>-0.010<br>-0.008<br>0.012<br>0.001<br>-0.003                                                                                                 | 61<br>64<br>102<br>22<br>28<br>31                                                  | 8.80E-05<br>5.90E-05<br>1.10E-08<br>0.98<br>0.24<br>0.13                                                                                                          |  |
| 18                                                               | IP00024312                                                                                                                                                        | FYVE, RhoGEF and PH domain-containing protein 1                                                                                                                                                                                                                                                                                                                                                              | RILVK[SLD]DPGQSL[EPH]EPQPR<br>EGPQR[LR]ADPGPPT[TPSR]PSPK<br>GASEPGLL[AR]RGCSALGGPLDPV[EP]GSD[SL]GAAPGHR<br>FPMAR[ISTSGPLDKED]TRIQ<br>RNR[NLGGV]mGfmlNRJ<br>RKR[HK]dNETNLQOQVWGNRIN<br>GIMR[RG]eLDLNDSPRJS<br>SASLPSYRK[TDV]VRLVS[V]TRP[PG]SQTR<br>RQR[SASV]NKEPVSLPGmRJR                                                                                                                                                                                                                                                     | Phospho (ST)<br>Phospho (ST)<br>Phospho (ST)<br>Phospho (ST)<br>Phospho (ST)<br>Phospho (ST)<br>Phospho (ST)<br>Phospho (ST)<br>Phospho (ST)<br>Phospho (ST)                                                                                                                 | 1062.488<br>747.381<br>981.137<br>821.867<br>810.866<br>1117.011<br>719.825<br>767.056<br>890.937                                                                     | 2<br>2<br>2<br>2<br>2<br>2<br>2<br>2<br>2                                         | 2122.968<br>2329.100<br>2940.388<br>1641.725<br>1619.720<br>2322.007<br>1437.625<br>2297.153<br>1779.859                                                                         | -0.008<br>0.021<br>0.002<br>-0.006<br>-0.001<br>-0.001<br>0.010<br>0.992<br>0.001                                                                     | 73<br>22<br>94<br>58<br>92<br>57<br>86<br>23<br>50                                 | 7.80E-06<br>0.91<br>7.10E-08<br>0.0016<br>8.20E-08<br>0.00032<br>2.60E-07<br>0.68<br>0.0013                                                                       |  |
| 19                                                               | IP000396063                                                                                                                                                       | Similar to IRLB                                                                                                                                                                                                                                                                                                                                                                                              | RNR[NLGGV]mGfmlNRJ<br>RKR[HK]dNETNLQOQVWGNRIN<br>GIMR[RG]eLDLNDSPRJS<br>SASLPSYRK[TDV]VRLVS[V]TRP[PG]SQTR<br>RQR[SASV]NKEPVSLPGmRJR                                                                                                                                                                                                                                                                                                                                                                                          | Phospho (ST)<br>Phospho (ST)<br>Phospho (ST)<br>Phospho (ST)<br>Phospho (ST)                                                                                                                                                                                                 | 810.866<br>1117.011<br>719.825<br>767.056<br>890.937                                                                                                                  | 2<br>2<br>2<br>2<br>2                                                             | 1619.720<br>2322.007<br>1437.625<br>2297.153<br>1779.859                                                                                                                         | -0.001<br>-0.001<br>0.010<br>0.992<br>0.001                                                                                                           | 92<br>57<br>86<br>23<br>50                                                         | 8.20E-08<br>0.00032<br>2.60E-07<br>0.68<br>0.0013                                                                                                                 |  |
| 20                                                               | IP000291802<br>IP000409590<br>IP000409591<br>IP000409593                                                                                                          | Isoform 3 of LIM domain only protein 7<br>Isoform 1 of LIM domain only protein 7<br>Isoform 2 of LIM domain only protein 7<br>Isoform 4 of LIM domain only protein 7                                                                                                                                                                                                                                         | R[LESL]nNPSLSTNLGSPSRJR<br>R[IR]QPPVPLTSLGPEAHQGFERSIQ                                                                                                                                                                                                                                                                                                                                                                                                                                                                       | Phospho (ST)<br>Phospho (ST)                                                                                                                                                                                                                                                 | 1029.496<br>813.736                                                                                                                                                   | 2<br>2                                                                            | 2056.983<br>2437.190                                                                                                                                                             | -0.005<br>0.996                                                                                                                                       | 96<br>30                                                                           | 3.80E-08<br>0.17                                                                                                                                                  |  |
| 21                                                               | IP000431698<br>IP000783045<br>IP000784401                                                                                                                         | 68 kDa protein<br>transducer of regulated CREB protein 3 isoform a<br>transducer of regulated CREB protein 3 isoform b                                                                                                                                                                                                                                                                                       | R[LESL]nNPSLSTNLGSPSRJR<br>R[IR]QPPVPLTSLGPEAHQGFERSIQ                                                                                                                                                                                                                                                                                                                                                                                                                                                                       | Phospho (ST)<br>Phospho (ST)                                                                                                                                                                                                                                                 | 1029.496<br>813.736                                                                                                                                                   | 2<br>2                                                                            | 2056.983<br>2437.190                                                                                                                                                             | -0.005<br>0.996                                                                                                                                       | 96<br>30                                                                           | 3.80E-08<br>0.17                                                                                                                                                  |  |
| 22                                                               | IP00028359                                                                                                                                                        | Hypothetical protein DKF7p61f0123                                                                                                                                                                                                                                                                                                                                                                            | R[LESL]nNPSLSTNLGSPSRJR<br>R[IR]QPPVPLTSLGPEAHQGFERSIQ                                                                                                                                                                                                                                                                                                                                                                                                                                                                       | Phospho (ST)<br>Phospho (ST)                                                                                                                                                                                                                                                 | 1029.496<br>813.736                                                                                                                                                   | 2<br>2                                                                            | 2056.983<br>2437.190                                                                                                                                                             | -0.005<br>0.996                                                                                                                                       | 96<br>30                                                                           | 3.80E-08<br>0.17                                                                                                                                                  |  |
| 24                                                               | IP000169296<br>IP000169299<br>IP00023555<br>IP000167053                                                                                                           | Isoform 2b of Oxysterol-binding protein-related protein 3<br>Isoform 2a of Oxysterol-binding protein-related protein 3<br>Isoform 1a of Oxysterol-binding protein-related protein 3<br>Isoform 1b of Oxysterol-binding protein-related protein 3                                                                                                                                                             | R[LESL]nNPSLSTNLGSPSRJR<br>R[IR]QPPVPLTSLGPEAHQGFERSIQ                                                                                                                                                                                                                                                                                                                                                                                                                                                                       | Phospho (ST)<br>Phospho (ST)                                                                                                                                                                                                                                                 | 1029.496<br>813.736                                                                                                                                                   | 2<br>2                                                                            | 2056.983<br>2437.190                                                                                                                                                             | -0.005<br>0.996                                                                                                                                       | 96<br>30                                                                           | 3.80E-08<br>0.17                                                                                                                                                  |  |
| 25                                                               | IP000329495<br>IP000455786<br>IP000456617<br>IP000478184<br>IP000516885<br>IP000515115<br>IP000551038<br>IP000644747<br>IP000744789<br>IP000747332<br>IP000784047 | Isoform 1 of Actin-binding LIM protein 1<br>Actin binding LIM protein 1<br>Isoform 2 of Actin-binding LIM protein 1<br>Isoform 4 of Actin-binding LIM protein 1<br>actin-binding LIM protein 1 isoform a<br>Actin binding LIM protein 1<br>Isoform 3 of Actin-binding LIM protein 1<br>Actin binding LIM protein 1<br>46 kDa protein<br>actin-binding LIM protein 1 isoform c<br>Actin binding LIM protein 1 | MHR[ST]SQSINS[V]YSRJR<br>SPR[TL]S[TP]SAEGYQVDRD<br>MKR[R]SS[GREED]EELLRJR<br>K[QHA]LAAQSKS[SE]DIIKJF<br>MRMDR[GV]smPmLEPK                                                                                                                                                                                                                                                                                                                                                                                                    | Phospho (ST)<br>Phospho                                                                                                                                                                                                                                                      |                                                                                                                                                                       |                                                                                   |                                                                                                                                                                                  |                                                                                                                                                       |                                                                                    |                                                                                                                                                                   |  |

| prot_hit | prot_acc    | prot_desc                                                             | [peptide sequences identified by MS within square brackets] and extended as explained in Suppl table 3 | pep_mod        | pep_exp_mz | pep_exp_z | pep_calc_mr | pep_delta | pep_score | pep_expect |
|----------|-------------|-----------------------------------------------------------------------|--------------------------------------------------------------------------------------------------------|----------------|------------|-----------|-------------|-----------|-----------|------------|
| 34       | IP00556645  | forkhead box K1                                                       | PLSSRIASAPSTHPGImSPRIS                                                                                 | Phospho (ST)   | 801.362    | 2         | 1600.707    | 0.002     | 69        | 1.40E-05   |
| 35       | IP000456943 | SH3 multiple domains 1                                                | SCALR[RN]ESLAIADGLR                                                                                    | Phospho (ST)   | 706.835    | 2         | 1411.646    | 0.011     | 52        | 0.00079    |
|          | IP00050923  | SH3 multiple domains 1                                                | FAER[AAG]SGSDFLPAQR                                                                                    | Phospho (ST)   | 789.376    | 2         | 1576.725    | 0.014     | 71        | 1.10E-05   |
|          | IP00640992  | SH3 multiple domains 1                                                | PPAPPSPKIEAEGETPTGASESQDPR                                                                             | Phospho (ST)   | 913.856    | 2         | 1825.700    | -0.004    | 56        | 0.00017    |
|          | IP00640992  | SH3 multiple domains 1                                                | EGSRR[IS]SSDILITLPTTPCPTK                                                                              | Phospho (ST)   | 1048.005   | 2         | 2093.012    | 0.983     | 21        | 1.1        |
|          | IP00640992  | SH3 multiple domains 1                                                | PIAKK[E]SLPLCNASNGSAGVDPDR                                                                             | Phospho (ST)   | 1125.034   | 2         | 2248.056    | -0.003    | 31        | 0.14       |
| 37       | IP00010088  | Histone deacetylase 4                                                 | RPLSR[AQ]SSIPASATFPVQEPPTKPR                                                                           | Phospho (ST)   | 1181.575   | 2         | 2361.137    | -0.001    | 88        | 2.60E-07   |
| 38       | IP001179071 | Nuclear receptor coactivator 6                                        | KIPGR[RN]RTEETPVASESVNGHRK                                                                             | Phospho (ST)   | 779.360    | 3         | 2334.035    | 1.023     | 54        | 0.00062    |
|          | IP001179071 | Nuclear receptor coactivator 6                                        | TLLKImTSvPVGIGTASACGSLPGALPFSVRIS                                                                      | Phospho (ST)   | 850.071    | 2         | 2547.204    | -0.012    | 62        | 9.40E-05   |
|          | IP001179071 | Nuclear receptor coactivator 6                                        | RATPTVQ[PS]PQSSPVVSSIPVQKVKIE                                                                          | Phospho (ST)   | 972.154    | 2         | 2013.446    | -0.005    | 38        | 0.021      |
|          | IP001179071 | Nuclear receptor coactivator 6                                        | RQR[NL]AGSLYPPVSNIPRIS                                                                                 | Phospho (ST)   | 849.416    | 2         | 1696.819    | -0.001    | 74        | 6.10E-06   |
| 39       | IP00640136  | regulatory factor X domain containing 2                               | RTR[AY]GSDLPSSSGGANGTAGGGGGARJA                                                                        | Phospho (ST)   | 1139.460   | 2         | 2276.930    | -0.006    | 90        | 8.70E-08   |
|          | IP00783984  | 138 kDa protein                                                       | RIFPAQVPSAHOQPSASGGGAAAAAPAAPAPRIS                                                                     | Phospho (ST)   | 949.460    | 3         | 2845.366    | -0.009    | 52        | 0.001      |
|          | IP00293427  | zinc finger/RING finger 2                                             | PVRMR[RN]FTLSSNTIR                                                                                     | Phospho (ST)   | 830.398    | 2         | 1658.778    | 0.003     | 94        | 4.90E-08   |
| 41       | IP00305589  | Isoform 1 of 6-phosphofructo-2-kinase/fructose-2,6-bisphosphatase 2   | SSSNTIRRR[PN]VYSGSRPLKPLPLR                                                                            | Phospho (ST)   | 932.495    | 2         | 1862.977    | -0.001    | 29        | 0.13       |
| 42       | IP00021634  | Kinesin light chain 2                                                 | QEPNPRMKR[AS]NLNFK                                                                                     | Phospho (ST)   | 537.254    | 2         | 1072.495    | -0.001    | 46        | 0.02       |
|          | IP00021634  | Kinesin light chain 2                                                 | NPRMK[RAS]NLNFK                                                                                        | Phospho (ST)   | 615.306    | 2         | 1228.596    | 0.000     | 49        | 0.0014     |
|          | IP00021634  | Kinesin light chain 2                                                 | LSDSR[TL]SSISMID                                                                                       | Phospho (ST)   | 652.272    | 2         | 1262.521    | 0.009     | 53        | 0.0004     |
| 45       | IP00006682  | Protein phosphatase 1 regulatory subunit 3D                           | MISRGPSAVLPSALGRK                                                                                      | 2 Phospho (ST) | 851.898    | 2         | 1700.765    | 1.017     | 20        | 1.2        |
|          | IP00006682  | Protein phosphatase 1 regulatory subunit 3D                           | KLIGPR[SL]CLSLDGGVALERJA                                                                               | Phospho (ST)   | 934.924    | 2         | 1867.839    | -0.005    | 96        | 3.30E-08   |
| 46       | IP00552905  | Isoform 1 of Proline-rich transmembrane protein 3                     | R[GPV]PQHVVEPDGAAAAASGSLSDFSRJG                                                                        | Phospho (ST)   | 920.756    | 3         | 2759.255    | -0.009    | 42        | 0.0096     |
|          | IP00788160  | Isoform 2 of Proline-rich transmembrane protein 3                     | GRCKSLSDVIR[VR]GPVQHVVEPDGAAAAASGSLSDFSRJ                                                              | Phospho (ST)   | 1005.813   | 3         | 3014.425    | -0.009    | 94        | 7.30E-08   |
| 47       | IP00022479  | guanine nucleotide exchange factor p532                               | R[AG]QTPSSSLPSPSDEVGGR                                                                                 | Phospho (ST)   | 1090.978   | 2         | 2017.936    | 0.007     | 46        | 0.0039     |
|          | IP00022479  | guanine nucleotide exchange factor p532                               | DPSSR[SL]SPPPLAVPLLEGGSLRQ                                                                             | Phospho (ST)   | 1195.111   | 2         | 2388.216    | -0.009    | 56        | 0.00032    |
|          | IP00022479  | guanine nucleotide exchange factor p532                               | QQEIR[VR]LDLPGQDQVYIAACNSVHIR                                                                          | Phospho (ST)   | 890.077    | 3         | 2667.211    | -0.001    | 74        | 6.20E-06   |
|          | IP00022479  | guanine nucleotide exchange factor p532                               | VRSMPVPTK[AS]FSGSILTR                                                                                  | Phospho (ST)   | 659.828    | 2         | 1317.633    | 0.008     | 76        | 2.70E-06   |
| 48       | IP00007227  | R3H domain containing 2                                               | R[HR]STPHLDGAGGGGAAGDGLGLGSARJA                                                                        | Phospho (ST)   | 871.059    | 3         | 2610.157    | -0.002    | 97        | 3.30E-08   |
| 49       | IP00306195  | merozoin surface protein-1 mRNA                                       | LPRR[RL]NSDFQK                                                                                         | Phospho (ST)   | 516.725    | 2         | 1031.432    | 0.004     | 41        | 0.0052     |
|          | IP00549786  | AKT1S1 protein                                                        | QQYAKI[AL]VSVYVWIK                                                                                     | Phospho (ST)   | 692.359    | 2         | 1394.700    | 0.004     | 45        | 3.90E-05   |
| 50       | IP00218566  | Isoform 1A of Mitogen-activated protein kinase kinase 7               | QPRRR[AD]QLVTGTGEPGVSSRIS                                                                              | Phospho (ST)   | 977.961    | 2         | 1953.904    | 0.003     | 85        | 4.30E-07   |
|          | IP00218567  | Isoform 1C of Mitogen-activated protein kinase kinase 7               | R[RR]R[Q]DLTVGTGEPGVSSRIS                                                                              | Phospho (ST)   | 756.382    | 3         | 2266.107    | 0.019     | 56        | 0.00033    |
|          | IP00241935  | mitogen-activated protein kinase kinase 7 isoform D                   |                                                                                                        |                |            |           |             |           |           |            |
|          | IP00295738  | Isoform 1B of Mitogen-activated protein kinase kinase 7               |                                                                                                        |                |            |           |             |           |           |            |
|          | IP00641808  | Hypothetical protein DKFZp686f0420                                    |                                                                                                        |                |            |           |             |           |           |            |
| 51       | IP00022107  | leucine rich repeat and fibronectin type III domain containing 1      |                                                                                                        |                |            |           |             |           |           |            |
| 52       | IP00009862  | Cerebellar degeneration-related protein 2                             | PKKR[IS]SSITLSSLAGSDIVKIG                                                                              | Phospho (ST)   | 887.428    | 2         | 1772.844    | -0.003    | 65        | 4.10E-05   |
| 53       | IP001782992 | Isoform 1 of Serine/arginine repetitive matrix protein 2              | R[RS]PSV[SS]PEPAEKJS                                                                                   | Phospho (ST)   | 726.340    | 2         | 1449.650    | 1.016     | 48        | 0.0015     |
|          | IP001782992 | Isoform 1 of Serine/arginine repetitive matrix protein 2              | KImALPQEDAIATAPRRQ                                                                                     | Phospho (ST)   | 838.870    | 2         | 1675.728    | -0.002    | 48        | 0.0019     |
|          | IP001782992 | Isoform 1 of Serine/arginine repetitive matrix protein 2              | K[AG]mSSSQSISAPVLDVAVPRIT                                                                              | Phospho (ST)   | 1006.462   | 2         | 2010.908    | 0.002     | 46        | 0.0031     |
|          | IP001782992 | Isoform 1 of Serine/arginine repetitive matrix protein 2              | SPEIKLELNSPLRI                                                                                         | Phospho (ST)   | 1130.021   | 2         | 2258.037    | -0.009    | 45        | 0.0052     |
| 55       | IP00000893  | zinc finger protein 36                                                | PPGEALAPRILGPELSPSPISPLATSTPSR                                                                         | Phospho (ST)   | 1082.515   | 2         | 2163.010    | 0.007     | 80        | 1.50E-06   |
| 56       | IP00294391  | Cdc42 effector protein 3                                              | EEFR[ANS]TSDSVFTEPSPVLKIN                                                                              | Phospho (ST)   | 980.447    | 2         | 1958.887    | -0.008    | 71        | 9.80E-06   |
| 57       | IP00165547  | Isoform 2 of Phosphatidylinositol 4-kinase beta                       | DIRR[RL]EQI[LA]HTPIAFKIR                                                                               | Phospho (ST)   | 839.919    | 2         | 1677.824    | 0.000     | 53        | 0.00065    |
|          | IP00165547  | Isoform 2 of Phosphatidylinositol 4-kinase beta                       | NLKR[IA]NPVENEDEPVKIL                                                                                  | Phospho (ST)   | 883.892    | 2         | 1765.773    | -0.003    | 34        | 0.048      |
|          | IP00165547  | Isoform 2 of Phosphatidylinositol 4-kinase beta                       | RSTR[AV]ENLPECGITHEQRJA                                                                                | Phospho (ST)   | 924.903    | 2         | 1847.787    | 0.004     | 73        | 5.60E-06   |
|          | IP00165547  | Isoform 2 of Phosphatidylinositol 4-kinase beta                       | RIS[TR]VENLPECGITHEQRJA                                                                                | Phospho (ST)   | 731.667    | 3         | 2191.968    | 0.012     | 26        | 0.35       |
| 59       | IP00009866  | Isoform 1 of Keratin, type I cytoskeletal 13                          | RSLLGQDAKIMIGFSSASGVSFPR                                                                               | Phospho (ST)   | 736.839    | 2         | 1471.653    | 0.010     | 49        | 0.0013     |
|          | IP00384861  | Isoform 1 of ARF GTPase-activating protein GIT1                       | RQGGK[SL]SPTDNLLELSRIS                                                                                 | Phospho (ST)   | 806.384    | 2         | 1610.755    | -0.003    | 60        | 0.00014    |
|          | IP00743271  | Hypothetical protein DKFZp686g1540                                    |                                                                                                        |                |            |           |             |           |           |            |
| 61       | IP00021753  | Kinesin-like protein KIF13B                                           | LRLGAPEARR[SAT]SGATNLASLTAALAK                                                                         | Phospho (ST)   | 964.490    | 2         | 1926.966    | 0.000     | 72        | 9.70E-06   |
|          | IP00479529  | 203 kDa protein                                                       | GLRLGAPEARR[SAT]SGATNLASLTAALAK                                                                        | Phospho (ST)   | 1042.542   | 2         | 2083.067    | 0.002     | 50        | 0.0012     |
| 62       | IP00645409  | ankyrin repeat domain 34                                              | R[AP]SLPAPPYAGAPGPRIT                                                                                  | Phospho (ST)   | 843.404    | 2         | 1684.797    | -0.004    | 58        | 0.00022    |
|          | IP00645409  | ankyrin repeat domain 34                                              | R[Q]QESLPGAVPLSGRJR                                                                                    | Phospho (ST)   | 846.901    | 2         | 1691.788    | -0.001    | 40        | 0.014      |
|          | IP00645409  | ankyrin repeat domain 34                                              | PLSR[RNA]PEAQESGPPSGLRQ                                                                                | Phospho (ST)   | 923.925    | 2         | 1845.837    | -0.001    | 32        | 0.086      |
|          | IP00645409  | ankyrin repeat domain 34                                              | R[Q]GAPGSSGSGGPEL[SAL]RL                                                                               | Phospho (ST)   | 961.938    | 2         | 1921.853    | 0.008     | 54        | 0.00056    |
| 63       | IP00032236  | Isoform 2 of Angiotensin-like protein 2                               |                                                                                                        |                |            |           |             |           |           |            |
|          | IP00478030  | Isoform 1 of Angiotensin-like protein 2                               |                                                                                                        |                |            |           |             |           |           |            |
| 64       | IP00336159  | cyclin fold protein 1 isoform 2                                       | SARRK[SA]ADNLLTRJW                                                                                     | Phospho (ST)   | 612.789    | 2         | 1223.555    | 0.009     | 60        | 0.00011    |
|          | IP00413625  | Isoform 3 of Cyclin fold protein 1                                    | R[AST]FLSKQTDVRE                                                                                       | Phospho (ST)   | 816.902    | 2         | 1631.792    | -0.003    | 35        | 0.048      |
|          | IP00464577  | Isoform 1 of Cyclin fold protein 1                                    |                                                                                                        |                |            |           |             |           |           |            |
| 65       | IP00000654  | Coiled-coil domain-containing protein 6                               | K[LD]QVSPAPPRIJD                                                                                       | Phospho (ST)   | 672.326    | 2         | 1342.628    | 0.009     | 53        | 0.00059    |
|          | IP00000654  | Coiled-coil domain-containing protein 6                               | R[IL]QKLELDQVSPAPPRIJD                                                                                 | 2 Phospho (ST) | 1017.986   | 2         | 2033.959    | -0.001    | 49        | 0.0018     |
| 67       | IP00008137  | Zinc finger protein 295                                               | VTEVRIKITEPSPLSDPSDIRJ                                                                                 | Phospho (ST)   | 967.977    | 2         | 1933.940    | 0.000     | 39        | 0.021      |
|          | IP00008137  | Zinc finger protein 295                                               | K[IQ]PLPDPATGLSENPTATEKIL                                                                              | Phospho (ST)   | 1201.061   | 2         | 2400.110    | -0.003    | 64        | 7.30E-05   |
| 68       | IP00480046  | Isoform 2 of Microtubule-associated serine/threonine-protein kinase 2 | VRM[R]N[Q]SGSAPSLTAGLKIE                                                                               | Phospho (ST)   | 826.406    | 2         | 1650.798    | 0.000     | 50        | 0.0013     |
|          | IP00514071  | Isoform 1 of Microtubule-associated serine/threonine-protein kinase 2 |                                                                                                        |                |            |           |             |           |           |            |
|          | IP00742671  | 189 kDa protein                                                       |                                                                                                        |                |            |           |             |           |           |            |
| 70       | IP00024291  | Bcl2 antagonist of cell death                                         | RELRR[RM]SDEFVDSFKJK                                                                                   | Phospho (ST)   | 728.80108  | 2         | 1455.57412  | 0.013522  | 42.07     | 0.0041     |
|          | IP00024291  | Bcl2 antagonist of cell death                                         | RSRR[HS]YAGTEDDEGmGEEPPSPRRG                                                                           | Phospho (ST)   | 830.985248 | 3         | 2489.93187  | 0.002046  | 39.83     | 0.0065     |
| 73       | IP00183572  | Isoform 2 of Dedicator of cytokinesis protein 7                       | RSCN[RM]SHTSFTSITLTCRIL                                                                                | Phospho (ST)   | 989.929    | 2         | 1977.850    | -0.007    | 72        | 8.10E-06   |
|          | IP00470722  | Isoform 1 of Dedicator of cytokinesis protein 7                       | K[AA]PWSGNSPNAESITLQAMDRIS                                                                             | Phospho (ST)   | 1078.433   | 2         | 2154.868    | -0.016    | 34        | 0.032      |
| 74       | IP00026947  | Zinc finger protein 36                                                | ESPSLDGRR[LPI]FSRLISDID                                                                                | Phospho (ST)   | 721.855    | 2         | 1441.685    | 0.010     | 59        | 0.00014    |
|          | IP00026947  | Zinc finger protein 36                                                | SESPSLDPGR[LPI]FSRLISDID                                                                               | Phospho (ST)   | 800.403    | 2         | 1597.786    | 1.005     | 37        | 0.022      |
|          | IP00026947  | Zinc finger protein 36                                                | R[HT]PTGGALPYRJR                                                                                       | Phospho (ST)   | 738.362    | 2         | 1474.697    | 0.013     | 54        | 0.00046    |
| 75       | IP00299588  | ArgBPB protein                                                        |                                                                                                        |                |            |           |             |           |           |            |
|          | IP00442210  | Isoform 1 of Abl interactor 2                                         |                                                                                                        |                |            |           |             |           |           |            |
|          | IP00442211  | Isoform 2 of Abl interactor 2                                         |                                                                                                        |                |            |           |             |           |           |            |
|          | IP00442214  | Isoform 3 of Abl interactor 2                                         |                                                                                                        |                |            |           |             |           |           |            |
| 76       | IP00420019  | Isoform 1 of Protein Dos                                              | R[LEAA]EAGGASPDpPRJG                                                                                   | Phospho (ST)   | 902.891    | 2         | 1803.768    | 0.001     | 34        | 0.04       |
|          | IP00420019  | Isoform 1 of Protein Dos                                              | R[GA]GDIDTEPPAAPAPRPRJG                                                                                | Phospho (ST)   | 999.462    | 2         | 1996.912    | -0.003    | 24        | 0.56       |
|          | IP00420019  | Isoform 1 of Protein Dos                                              | RLAEFVVAIPALVAAAPAPRSPBA                                                                               | Phospho (ST)   | 1182.096   | 2         | 2361.162    | 1.016     | 52        | 0.00087    |
|          | IP00420019  | Isoform 1 of Protein Dos                                              | EVKAR[SG]TLGDGSAVNSASGSDSRIG                                                                           | Phospho (ST)   | 1089.432   | 2         | 2178.855    | -0.006    | 57        | 0.00013    |
|          | IP00420019  | Isoform 1 of Protein Dos                                              | PIER[VV]SSIEGGRPSVLSFQSPQLSKJS                                                                         | Phospho (ST)   | 827.737    | 3         | 2480.195    | -0.007    | 42        | 0.01       |
| 81       | IP00298950  | Hypothetical protein DKFZp686f0251                                    |                                                                                                        |                |            |           |             |           |           |            |
|          | IP00329787  | WD repeat domain 20 isoform 3                                         | K[FA]TLHLHDKIK                                                                                         | Phospho (ST)   | 570.267    | 2         | 1138.517    | 0.003     | 46        | 0.0024     |
|          | IP00377221  | WD repeat domain 20 isoform 1                                         |                                                                                                        |                |            |           |             |           |           |            |
| 83       | IP00174962  | Molecule interacting with Rab13                                       | K[LE]ELASPPAGRPAPRJK                                                                                   | Phospho (ST)   | 919.470    | 2         | 1836.925    | 0.001     | 43        | 0.0071     |
|          | IP00174962  | Molecule interacting with Rab13                                       | R[VE]QmPOASPGAPRIT                                                                                     | Phospho (ST)   | 788.969    | 2         | 1575.712    | 0.012     | 64        | 5.30E-05   |
| 84       | IP00071562  | Isoform 2 of Latrophilin-2 precursor                                  | YQISR[GN]GDYIIPINKIE                                                                                   | Phospho (ST)   | 685.825    | 2         | 1369.628    | 0.008     | 53        | 0.00067    |
|          | IP00410232  | Isoform 1 of Latrophilin-2 precursor                                  | R[DSL]YImPNLR                                                                                          | Phospho (ST)   | 696.802    | 2         | 1391.579    | 0.010     | 36        | 0.025      |
|          | IP00479140  | Latrophilin 2                                                         |                                                                                                        |                |            |           |             |           |           |            |
|          | IP00641868  | Latrophilin 2                                                         |                                                                                                        |                |            |           |             |           |           |            |
|          | IP00642406  | Latrophilin 2                                                         |                                                                                                        |                |            |           |             |           |           |            |
|          | IP00642961  | Latrophilin 2                                                         |                                                                                                        |                |            |           |             |           |           |            |
|          | IP00644480  | Latrophilin 2                                                         |                                                                                                        |                |            |           |             |           |           |            |
|          | IP00646434  | Latrophilin 2                                                         |                                                                                                        | </             |            |           |             |           |           |            |

| prot_hit | prot_acc                                             | prot_desc                                                                                                                                                                                                                  | [peptide sequences identified by MS within square brackets] and extended as explained in Suppl table 3                                    | pep_mod                                                      | pep_exp_mz                                | pep_exp_z        | pep_calc_mz                                 | pep_delta                        | pep_score            | pep_expect                       |
|----------|------------------------------------------------------|----------------------------------------------------------------------------------------------------------------------------------------------------------------------------------------------------------------------------|-------------------------------------------------------------------------------------------------------------------------------------------|--------------------------------------------------------------|-------------------------------------------|------------------|---------------------------------------------|----------------------------------|----------------------|----------------------------------|
| 87       | IP00166044                                           | Isoform 1 of Regulatory-associated protein of mTOR                                                                                                                                                                         | LOREQLSSCK[LRnLSDSSDSAL]<br>RIVLDTSSLTQSPAPATPNKIG<br>RVLDDTSSLTQSPAPATPNKIG                                                              | Phospho (ST)<br>Phospho (ST)<br>Phospho (ST)                 | 780.340<br>948.953<br>948.953             | 2<br>2<br>2      | 1558.651<br>1895.888<br>1895.888            | 0.014<br>0.005<br>0.005          | 24<br>41<br>41       | 0.41<br>0.01<br>0.01             |
| 88       | IP00216654<br>IP00292387                             | Isoform Beta of Nuclear phosphoprotein p130<br>Isoform Alpha of Nuclear phosphoprotein p130                                                                                                                                | R[GGSSISVQVNSIRFDE]-<br>ENFARIANSdIILNFRJA                                                                                                | Phospho (ST)<br>Phospho (ST)                                 | 873.897<br>665.319                        | 2<br>2           | 1745.787<br>1328.613                        | -0.009<br>0.011                  | 45<br>53             | 0.0039<br>0.00054                |
| 89       | IP00478176                                           | FAM110B                                                                                                                                                                                                                    | MIPCEETEIPALPSKRIJA                                                                                                                       | Phospho (ST)                                                 | 819.861                                   | 2                | 1637.712                                    | -0.004                           | 56                   | 0.00024                          |
| 91       | IP00375015                                           | Isoform DUT-N of Deoxyuridine 5-triphosphate nucleotidohydrolase                                                                                                                                                           | TFPARISSP[PPPALEER]T<br>SAPPPK(AQNSV)SIPVQAPPPGSAQLLPGKIV                                                                                 | Phospho (ST)<br>Phospho (ST)                                 | 678.819<br>1085.552                       | 2<br>2           | 1355.612<br>2165.088                        | 0.010<br>0.001                   | 33<br>39             | 0.062<br>0.017                   |
| 92       | IP00045360                                           | Protein capcua homolog                                                                                                                                                                                                     | R[VPGQGLFNREGEPTTPPAAPAPVAGSGSESSSGRIA<br>AVTK[ASdSFGSIVLIR]G                                                                             | Phospho (ST)<br>Phospho (ST)                                 | 1159.220<br>652.821                       | 3<br>2           | 3473.621<br>1303.617                        | 1.017<br>0.009                   | 39<br>52             | 0.021<br>0.0007                  |
| 93       | IP00014214<br>IP00332932                             | R3H domain protein 1<br>Isoform 1 of R3H domain-containing protein 1                                                                                                                                                       | AVTK[ASdSFGSIVLIR]G                                                                                                                       | Phospho (ST)                                                 | 652.821                                   | 2                | 1303.617                                    | 0.009                            | 52                   | 0.0007                           |
| 94       | IP00185919                                           | Isoform 1 of La-related protein 1                                                                                                                                                                                          | PPPKNVWTK[KNALPPVLTIVNGQPPHHSAPAK]<br>RKRKTR[HSNAPPLSHVGVVWdSR]E<br>HKEGTGOERIESPRLLQPLGAEPALDGEHGEGEPAGGGAAGAAGAGRI                      | Phospho (ST)<br>Phospho (ST)<br>Phospho (ST)                 | 802.399<br>1203.218<br>995.121            | 3<br>3<br>3      | 2404.179<br>3606.634<br>2982.343            | -0.005<br>-0.001<br>-0.001       | 21<br>51<br>45       | 1<br>0.012<br>0.0047             |
| 95       | IP00289866<br>IP00744754                             | Forkhead box protein O1A<br>forkhead box O1A                                                                                                                                                                               | R[RDIDGGTASLGLGEIK]G<br>GAQHVHSHSIPASLQGLTGGAACSPAQOHAHLR]Q                                                                               | Phospho (ST)<br>Phospho (ST)                                 | 925.445<br>765.359                        | 3<br>2           | 2773.305<br>1527.693                        | 0.010<br>1.011                   | 51<br>41             | 0.0015<br>0.009                  |
| 96       | IP00747018                                           | Similar to Sodium- and chloride-dependent creatine transporter 2                                                                                                                                                           | R[RDIDGGTASLGLGEIK]G                                                                                                                      | Phospho (ST)                                                 | 765.359                                   | 2                | 1527.693                                    | 1.011                            | 41                   | 0.009                            |
| 97       | IP00130266                                           | WW domain-containing transcription regulator protein 1                                                                                                                                                                     | R[RDIDGGTASLGLGEIK]G                                                                                                                      | Phospho (ST)                                                 | 765.359                                   | 2                | 1527.693                                    | 1.011                            | 41                   | 0.009                            |
| 98       | IP00295457<br>IP00305344                             | myosin phosphatase-Rho interacting protein isoform 1<br>Isoform 1 of Myosin phosphatase Rho-interacting protein                                                                                                            | R[RDIDGGTASLGLGEIK]G<br>SEKRAFPRKR[DFNTEAPAPLSDASA(S)PL(S)PHRR]<br>R[IMEVDRsPGLPMSDLK]IT                                                  | Phospho (ST)<br>Phospho (ST)<br>Phospho (ST)                 | 823.046<br>875.083<br>893.892             | 3<br>3<br>2      | 2466.122<br>2622.223<br>1785.768            | -0.004<br>0.005<br>0.001         | 36<br>31<br>44       | 0.04<br>0.13<br>0.0038           |
| 99       | IP00018370<br>IP00412650<br>IP00742841<br>IP00744075 | Isoform 2 of Supravillin<br>Isoform 1 of Supravillin<br>248 kDa protein<br>201 kDa protein                                                                                                                                 | RMNAR[YQ]QVPTLGEVEVQSGK[L]                                                                                                                | Phospho (ST)                                                 | 1035.993                                  | 2                | 2069.967                                    | 0.004                            | 63                   | 8.10E-05                         |
| 100      | IP00021786                                           | RAF proto-oncogene serine/threonine-protein kinase                                                                                                                                                                         | R[AAHTEIDINACTLITsPR]IL<br>RQRIS[TS]PNVHMVSTLPLVDSR[IM]<br>SQRQRIS[TS]PNVHMVSTLPLVDSR                                                     | Phospho (ST)<br>Phospho (ST)<br>Phospho (ST)                 | 969.424<br>1062.981<br>1062.981           | 2<br>2<br>2      | 1936.835<br>2123.956<br>2123.956            | -0.002<br>0.006<br>0.006         | 50<br>24<br>24       | 0.0013<br>0.58<br>0.58           |
| 101      | IP00060439                                           | KIAA0226 protein (Fragment)                                                                                                                                                                                                | LSSVLRIRSSSEGGTLLVTSYGAKIK                                                                                                                | Phospho (ST)                                                 | 918.431                                   | 2                | 1834.846                                    | 0.002                            | 46                   | 0.0041                           |
| 102      | IP00009900                                           | Protein FAM53C                                                                                                                                                                                                             | RHC[R]SLVVDLSR]W<br>PQQR[RF]sLSPGQASR]E                                                                                                   | Phospho (ST)<br>2 Phospho (ST)                               | 576.790<br>831.871                        | 2<br>2           | 1151.559<br>1661.733                        | 0.007<br>-0.006                  | 50<br>34             | 0.001<br>0.04                    |
| 103      | IP00153055<br>IP00374970<br>IP00742871               | Isoform 2 of Septin-10<br>Isoform 1 of Septin-10<br>septin 10 isoform 2                                                                                                                                                    | K[ATSEIHFQsSFLATGSNLR]K                                                                                                                   | Phospho (ST)                                                 | 1073.503                                  | 2                | 2144.989                                    | 0.002                            | 59                   | 0.00018                          |
| 104      | IP00414743<br>IP00646026                             | PREDICTED: SH2 domain containing 5<br>PREDICTED: SH2 domain containing 5                                                                                                                                                   | R[DQLSQNVHAlVsFR]R                                                                                                                        | Phospho (ST)                                                 | 847.906                                   | 2                | 1692.798                                    | 1.000                            | 57                   | 0.00051                          |
| 105      | IP00014068                                           | Isoform 1 of Serine/threonine-protein kinase PAK 4                                                                                                                                                                         | SSRD[K]RPLsGPDVGTPOQAGLAsGAK[IL]<br>OESSR[DK]RPLsGPDVGTPOQAGLAsGAK[IL]                                                                    | Phospho (ST)<br>Phospho (ST)                                 | 1028.511<br>767.056                       | 2<br>3           | 2055.015<br>2798.137                        | -0.007<br>0.008                  | 32<br>37             | 0.094<br>0.028                   |
| 108      | IP00386732<br>IP00470483<br>IP00479587               | Mitogen-activated protein kinase kinase 2<br>R3400L_1<br>IMP dehydrogenase/GMP reductase family protein<br>WDR62 protein                                                                                                   | RISR[SI]sLGDSEGPVIALAQPLR]<br>RHC[R]SLVVDLSR]W<br>PQQR[RF]sLSPGQASR]E                                                                     | Phospho (ST)<br>Phospho (ST)<br>2 Phospho (ST)               | 1134.019<br>576.790<br>831.871            | 2<br>2<br>2      | 2266.030<br>1151.559<br>1661.733            | -0.006<br>0.007<br>-0.006        | 48<br>50<br>34       | 0.0023<br>0.001<br>0.04          |
| 109      | IP00736251                                           | PREDICTED: similar to protein phosphatase 1H                                                                                                                                                                               | SSKR[IR]SLPNEGQLQK]E                                                                                                                      | Phospho (ST)                                                 | 739.877                                   | 2                | 1477.729                                    | 0.010                            | 51                   | 0.0011                           |
| 110      | IP00013384<br>IP00217124<br>IP00651657<br>IP00012856 | Isoform 2 of Kinase suppressor of ras-1<br>Isoform 3 of Kinase suppressor of ras-1<br>Isoform 1 of Kinase suppressor of ras-1<br>Forkhead box protein O3A                                                                  | LTRLR[IR]TEVPSDINPNVDR]A<br>ADDS[PSQ]sK[WPGSP]sR]<br>GGGR[AG]sAAAGCGGCGTLCQSLG[LE]DSARIV<br>LRR[R]VQDLEVEKPDASPTSLQR]s<br>NKNRR[SL]PVSK]s | Phospho (ST)<br>Phospho (ST)<br>Phospho (ST)<br>Phospho (ST) | 890.410<br>484.206<br>1229.564<br>816.744 | 2<br>2<br>3<br>3 | 1777.800<br>966.396<br>2457.121<br>2447.206 | 1.006<br>0.002<br>0.007<br>0.004 | 50<br>36<br>37<br>39 | 0.0012<br>0.01<br>0.028<br>0.017 |
| 115      | IP00304817                                           | SAM and SH3 domain-containing protein 1                                                                                                                                                                                    | KKNR[SL]PVSK]s<br>AGH[R]R[TS]EADRWLEEVSK]s<br>AGH[R]R[TS]EADRWLEEVSK]s                                                                    | Phospho (ST)<br>Phospho (ST)<br>Phospho (ST)                 | 1011.470<br>628.288<br>628.288            | 1<br>3<br>3      | 1010.462<br>1881.862<br>1881.862            | 0.001<br>-0.019<br>-0.019        | 25<br>35<br>37       | 0.31<br>0.43<br>0.028            |
| 116      | IP00028059<br>IP00180634<br>IP00180920<br>IP00216241 | Isoform 1 of Protein numb homolog<br>Isoform 2 of Protein numb homolog<br>Isoform 4 of Protein numb homolog<br>Isoform 3 of Protein numb homolog                                                                           | AGH[R]R[TS]EADRWLEEVSK]s<br>AGH[R]R[TS]EADRWLEEVSK]s                                                                                      | Phospho (ST)<br>Phospho (ST)                                 | 628.288<br>628.288                        | 3<br>3           | 1881.862<br>1881.862                        | -0.019<br>-0.019                 | 35<br>37             | 0.43<br>0.028                    |
| 117      | IP00337612<br>IP00550954                             | Discoidin, CUB and LCCL domain-containing protein 1 precursor<br>Discoidin, CUB and LCCL domain containing 1                                                                                                               | K[HSLSS]GFGSPVAGVGAQDGYQRPHSAQPADR]G                                                                                                      | Phospho (ST)                                                 | 833.628                                   | 4                | 3330.480                                    | 0.002                            | 41                   | 0.011                            |
| 118      | IP00295004<br>IP00295095                             | Isoform 1 of Alsin<br>Isoform 2 of Alsin                                                                                                                                                                                   | EGGSR[RL]sLGLLsQVSPR]L                                                                                                                    | 2 Phospho (ST)                                               | 841.923                                   | 2                | 1681.832                                    | -0.001                           | 45                   | 0.0047                           |
| 119      | IP00025512                                           | Heat-shock protein beta-1                                                                                                                                                                                                  | RALSR[QL]sGVSEIR]H                                                                                                                        | Phospho (ST)                                                 | 578.278                                   | 2                | 1154.533                                    | 0.008                            | 44                   | 0.0044                           |
| 120      | IP00014340                                           | Myosin binding subunit 85                                                                                                                                                                                                  | GLORISASSWLEGTSTQAK]E                                                                                                                     | Phospho (ST)                                                 | 810.852                                   | 2                | 1618.688                                    | 1.001                            | 36                   | 0.024                            |
| 121      | IP00396279                                           | CLIP-associating protein 1                                                                                                                                                                                                 | NAMR[V]L[ST]DLEAAVADAL]K<br>K[IECD]VSRIDGGAASPAEGR]G                                                                                      | Phospho (ST)<br>Phospho (ST)                                 | 892.435<br>1015.426                       | 2<br>2           | 1782.865<br>2026.842                        | -0.009<br>1.997                  | 36<br>20             | 0.039<br>0.97                    |
| 122      | IP00216546<br>IP00328272                             | Isoform 2 of Probable palmitoyltransferase ZDHHC5<br>Isoform 1 of Probable palmitoyltransferase ZDHHC5                                                                                                                     | FKGPKD[L]K[R]G[Gs]PEP[AP]L[IG]R]<br>K[L]L[RP]PLK[RE]E[EG]L[GDS]G[OST]P[CS]GHAPRIT                                                         | Phospho (ST)<br>Phospho (ST)                                 | 817.881<br>868.928                        | 2<br>4           | 1633.750<br>3471.690                        | -0.003<br>-0.006                 | 23<br>35             | 0.65<br>0.045                    |
| 123      | IP00014414<br>IP00645146                             | Bromodomain-containing protein 2<br>88 kDa protein                                                                                                                                                                         | PRPPQPKSK[KASGSGGGAALGPSGFGPSGGGK]L[P]K                                                                                                   | Phospho (ST)                                                 | 852.750                                   | 3                | 2553.222                                    | 2.006                            | 41                   | 0.011                            |
| 124      | IP00171636<br>IP00549914<br>IP00550839<br>IP00641075 | Neuron navigator 1<br>CDNA FLJ12569 fs, clone NT2RM4000887.<br>Neuron navigator 1<br>neuron navigator 1                                                                                                                    | VNGR[K]TSLDVSNAEPEGLAPGAR]S                                                                                                               | Phospho (ST)                                                 | 1049.006                                  | 2                | 2095.994                                    | 0.004                            | 41                   | 0.012                            |
| 125      | IP00464978                                           | Insulin receptor substrate 2 insertion mutant (Fragment)                                                                                                                                                                   | RSYR[RV]sGDAQDLDR]G                                                                                                                       | Phospho (ST)                                                 | 691.812                                   | 2                | 1381.599                                    | 0.011                            | 41                   | 0.0078                           |
| 127      | IP00017801<br>IP00181703                             | mitogen-activated protein kinase kinase 3 isoform 2<br>mitogen-activated protein kinase kinase 3 isoform 1                                                                                                                 | R[ASOsAGDINTV]OPPEPR]S                                                                                                                    | Phospho (ST)                                                 | 1012.459                                  | 2                | 2022.905                                    | -0.002                           | 40                   | 0.013                            |
| 132      | IP00451401<br>IP00465028<br>IP00746832               | Isoform 2 of Triosephosphate isomerase<br>Triosephosphate isomerase<br>30 kDa protein                                                                                                                                      | KMNGR[KQ]sLGLIGLTLNAAK]V                                                                                                                  | Phospho (ST)                                                 | 811.930                                   | 2                | 1621.844                                    | 0.002                            | 35                   | 0.031                            |
| 133      | IP00021449<br>IP00645180                             | Isoform 1 of Inositol-trisphosphate 3-kinase B<br>Isoform 1 of Inositol-trisphosphate 3-kinase B                                                                                                                           | K[V]GmFEAHQ]QSSAIAQPrsPR]L                                                                                                                | Phospho (ST)                                                 | 826.39745                                 | 3                | 2476.168213                                 | 0.002309                         | 35.34                | 0.05                             |
| 134      | IP00025155                                           | FAM83G                                                                                                                                                                                                                     | KDLDLAGFKR[KVAVYIVDEsNVK]<br>VPIRR[RH]sEQVANGT]PPPR                                                                                       | Phospho (ST)<br>Phospho (ST)                                 | 828.940<br>861.905                        | 2<br>2           | 1655.854<br>1721.800                        | 0.012<br>-0.005                  | 26<br>35             | 0.25<br>0.042                    |
| 137      | IP00735239<br>IP00736702                             | PREDICTED: similar to Ataxin-1<br>PREDICTED: similar to Ataxin-1                                                                                                                                                           | K[APsATS]sPGLPHHS[TOPLD]LAPGR]M                                                                                                           | Phospho (ST)                                                 | 897.096                                   | 3                | 2688.266                                    | 0.002                            | 34                   | 0.064                            |
| 138      | IP00012442                                           | Ras-GTPase-activating protein-binding protein 1                                                                                                                                                                            | K[S]SS[PA]PADAQ]TVOED]RIT                                                                                                                 | Phospho (ST)                                                 | 982.950                                   | 2                | 1963.889                                    | -0.003                           | 34                   | 0.057                            |
| 140      | IP00303383                                           | Isoform 3 of CREB-regulated transcription coactivator 1                                                                                                                                                                    | TSWR[R]TNSD[AL]HQS]TmTPTQPESSFGSDQVHQK]R<br>TSWR[R]TNSD[AL]HQS]TmTPTQPESSFGSDQVHQK]R                                                      | Phospho (ST)<br>Phospho (ST)                                 | 1110.142<br>871.882                       | 3<br>4           | 3327.399<br>3483.500                        | 0.005<br>-0.001                  | 36<br>35             | 0.039<br>0.051                   |
| 141      | IP00386763<br>IP00748386                             | Isoform 1 of ADAMTS-9 precursor<br>217 kDa protein                                                                                                                                                                         | DIKSPDG[T]R[V]GKCGGYCGKCTPSSG[GL]EVR]                                                                                                     | Phospho (ST)                                                 | 837.033                                   | 3                | 2508.096                                    | -0.018                           | 33                   | 0.06                             |
| 142      | IP00025155                                           | TBC1 domain family member 22B                                                                                                                                                                                              | LHK[QO]LPLR]PIIP[V]ARI                                                                                                                    | Phospho (ST)                                                 | 594.348                                   | 3                | 1780.012                                    | 0.010                            | 33                   | 0.011                            |
| 143      | IP00216633<br>IP00292290<br>IP00556409               | Isoform Short of Dematin<br>Isoform Long of Dematin<br>Dematin variant                                                                                                                                                     | SLSPK[ST]sPPSPVWADSR]                                                                                                                     | Phospho (ST)                                                 | 846.869                                   | 2                | 1691.719                                    | 0.005                            | 33                   | 0.055                            |
| 144      | IP00009319<br>IP00218563<br>IP00555978               | Isoform 1 of SH3 adapter protein SPIN90<br>Isoform 2 of SH3 adapter protein SPIN90<br>NCK interacting protein with SH3 domain isoform 2                                                                                    | QPR[RAA]T]PPPPV]K                                                                                                                         | Phospho (ST)                                                 | 656.349                                   | 2                | 1310.675                                    | 0.008                            | 33                   | 0.053                            |
| 145      | IP00301263                                           | CAD protein                                                                                                                                                                                                                | R[IHRA]sDPGLPAEPK]<br>PDGR[FH]LPP[IHRA]sDPGLPAEPK]EK                                                                                      | Phospho (ST)<br>Phospho (ST)                                 | 848.903<br>977.472                        | 2<br>2           | 1695.798<br>1952.936                        | -0.007<br>-0.007                 | 30<br>22             | 0.14<br>1.1                      |
| 147      | IP00031376<br>IP00006213                             | PCMI protein<br>Pericentriolar material 1                                                                                                                                                                                  | R[V]TND]sPeSPGVGR]R<br>R[V]TND]sPeSPGVGR]R                                                                                                | 2 Phospho (ST)<br>Phospho (ST)                               | 837.840<br>941.384                        | 2<br>2           | 1673.670<br>1880.757                        | -0.004<br>-0.004                 | 21<br>32             | 0.61<br>0.053                    |
| 148      | IP00012469<br>IP00220229<br>IP00374060<br>IP00432877 | Isoform 1 of Signaling lymphocytic activation molecule precursor<br>Isoform 3 of Signaling lymphocytic activation molecule precursor<br>Isoform 2 of Signaling lymphocytic activation molecule precursor<br>SLAMF1 protein | K[S]MNSKSH[V]TMAKSLPENS]VENK]I                                                                                                            | Phospho (ST)                                                 | 880.435322                                | 3                | 2638.285919                                 | -0.001781                        | 31.68                | 0.1                              |



**Supplementary table 3** The phosphorylated peptides identified by their MS2 spectra (supplementary Fig 1) are assigned to proteins and listed with their protein assignment statistics in supplementary table 2. The peptides identified by MS are within the square brackets and they have been manually extended to reveal the preceding sequence within the protein. Here, the same phosphopeptides are linked to the literature on previously-studied 14-3-3-binding proteins, with different types of phosphorylated motif highlighted, including the 14 unique RxRxx(pS/T) motifs within 13 proteins whose phosphorylated residues are in **yellow**, Rxx(pS/T) in **red/orange**, (pS/T)P in **green**, and other motifs in **teal** (221 unique sites in total). Within peptides sequences lower case s and t indicate the positions of the phosphorylated residues. (SS), (SSS), (TLS), (ST) within a sequence means that the position of the phosphorylated residue could not be pinpointed precisely within these regions. Approved gene names linked to IPI numbers were found using Bioinformatic Harvester (<http://harvester.fzk.de/harvester/human/>). Gene names are shaded in **pink** for proteins that have already been reported to bind to 14-3-3s in response to insulin and/or PKB/Akt phosphorylation, or that were confirmed to bind to 14-3-3s in response to insulin/IGF1 in this study. **Turquoise** shading is for proteins that have been found to be phosphorylated and bind directly to 14-3-3s, but not in response to insulin (or in some cases it is not yet known whether they are regulated by insulin). YAP1, TSC2 and CRTC2 are in both colours because whether or not their 14-3-3 binding is regulated by insulin appears to be controversial. **Grey** shading is for proteins isolated in previous 14-3-3-binding proteomics screens, but whether they bind directly to 14-3-3s is not known. A \* beside the gene symbols indicates the phosphopeptides from proteins whose D0/D4 ratios were also identified (supplementary table 1) and this overlapping set of proteins is also listed in Table I within the main text.

| <b>Phosphorylated residues in peptides [as identified by MS] with sequences extended to search for RxRxx(pS/T) and other motifs</b> | <b>Representative parent protein</b>                                                                                                                                             | <b>Approved gene symbol</b>        | <b>Notes [Protein ID in supplementary table 2]</b>                                                                                                                                                                                                                                                                                      |
|-------------------------------------------------------------------------------------------------------------------------------------|----------------------------------------------------------------------------------------------------------------------------------------------------------------------------------|------------------------------------|-----------------------------------------------------------------------------------------------------------------------------------------------------------------------------------------------------------------------------------------------------------------------------------------------------------------------------------------|
| LPRPR[LN <sup>s</sup> SDFQK]<br>QQYAK[ <sup>s</sup> LPVSVPVWGFK]                                                                    | IPI00306195 CDNA<br>FLJ30949 fis, clone<br>HCASM1000021, weakly similar to Plasmodium berghei strain NYU2 merozoite surface protein-1 mRNA; proline-rich Akt substrate of 40 kDa | <b>AKT1S1</b> *<br><b>(PRAS40)</b> | D0/D4 (+/- insulin) score of 9.93 in <b>supplementary table 1</b> . Kovacina et al (2003) Identification of a proline-rich Akt substrate as a 14-3-3 binding partner. J. Biol. Chem 278, 10189-10194; also more recent papers). PRAS40 binds to 14-3-3 when phosphorylated by PKB/Akt and regulates/is regulated by mTORC1. <b>[49]</b> |
| PVRMR[RN <sup>s</sup> FTPLSSNTIR]<br>SSSNTIRRP[ <sup>s</sup> NYSVGSRPLKPL <sup>s</sup> PLR]                                         | IPI00305589 Isoform 1 of 6-phosphofructo-2-kinase/fructose-2,6-biphosphatase 2 (cardiac PFK-2)                                                                                   | <b>PFKFB2</b> *                    | D0/D4 (+/- insulin) score of 6.23 in <b>supplementary table 1</b> . Pozuelo Rubio et al (2003) 14-3-3s regulate fructose-2,6-bisphosphate levels by binding to PKB-phosphorylated cardiac fructose-2,6-bisphosphate kinase/phosphatase. EMBO J. 22, 3514-3523. <b>[41]</b>                                                              |
| IRRPR[SL <sup>s</sup> SPTVTLSPLEGAK]*                                                                                               | IPI00023287 Isoform 4 of E3 ubiquitin-protein ligase NEDD4-like protein                                                                                                          | <b>NEDD4L</b>                      | 14-3-3s bind to SGK-phosphorylated Nedd4-2 (Nagaki et al (2006) 14-3-3 Mediates phosphorylation-dependent inhibition of the interaction between the ubiquitin E3 ligase Nedd4-2 and                                                                                                                                                     |

|                                                                                                                                                                                                                                                      |                                                                                                                |             |                                                                                                                                                                                                                                                                                                                                                                                                                                                                                                                                                                                                                                                                                                                                                                                                                                                                                                                                                                   |
|------------------------------------------------------------------------------------------------------------------------------------------------------------------------------------------------------------------------------------------------------|----------------------------------------------------------------------------------------------------------------|-------------|-------------------------------------------------------------------------------------------------------------------------------------------------------------------------------------------------------------------------------------------------------------------------------------------------------------------------------------------------------------------------------------------------------------------------------------------------------------------------------------------------------------------------------------------------------------------------------------------------------------------------------------------------------------------------------------------------------------------------------------------------------------------------------------------------------------------------------------------------------------------------------------------------------------------------------------------------------------------|
|                                                                                                                                                                                                                                                      | (Nedd4-2)                                                                                                      |             | epithelial Na <sup>+</sup> channels. <i>Biochemistry</i> . 45, 6733-6740.) [28]                                                                                                                                                                                                                                                                                                                                                                                                                                                                                                                                                                                                                                                                                                                                                                                                                                                                                   |
| K[NLALsRESLVV]-<br>R[GPALTPIRDEEWGGHsPR]S<br>RRPR[ARsVDALDDLTPSTAESGSR]<br>SMRVLYYMEK[ELANFDPsRPGPPsGRVER]<br>EDDWRSRPSR[GPALTPIRDEEWGGHsPRsPR]<br>RARRPR[ARsVDALDDLTPSTAESGSRsPTsNGGR]S                                                             | IPI00328218 Isoform 2 of Lipolysis-stimulated lipoprotein receptor (LSR)/LISCH7                                | LSR*        | D0/D4 (+/- insulin) score of 1.2 in <b>supplementary table 1</b> . Isolated by its affinity for 14-3-3s in Jin et al (2004) Proteomic, functional, and domain-based analysis of in vivo 14-3-3 binding proteins involved in cytoskeletal regulation and cellular organization. <i>Curr Biol</i> . 14, 1436-1450. [17]                                                                                                                                                                                                                                                                                                                                                                                                                                                                                                                                                                                                                                             |
| SARKR[SASADNLTLP]W<br>R[ASTIFLSKsQTDVR]E                                                                                                                                                                                                             | IPI00336159 cyclin fold protein 1 isoform 2 CBCP1, CFP1, Cyclin-box protein 1, Cyclin fold protein 1, cyclin Y | CCNY        | The RxRxxs phosphorylation site identified here was also reported in Olsen et al (2006) <i>Global, in vivo, and site-specific phosphorylation dynamics in signaling networks</i> . <i>Cell</i> . 127, 635-648, and Beausoleil et al (2004) <i>Large-scale characterization of HeLa cell nuclear phosphoproteins</i> . <i>Proc Natl Acad Sci U S A</i> . 101, 12130-12135. [64]                                                                                                                                                                                                                                                                                                                                                                                                                                                                                                                                                                                    |
| KSHSR[QAsTDAGTAGALTPQHVR]<br>PPEPK[SHsRQASsDAGTAGALTPQHVR]<br>IVHVR[GDSsETDLEALFNAVmNPK]<br>QVRPQELALR[SQLPsLEQDGGTQNPVSSPGmSQELR]<br>AGALTPQHVR[AHSSPAsLQLGAVSPGTLTPTGVVSG<br>PAATPTAQHLR]<br>AGALTPQHVR[AHSSPAsLQLGAVsPGTLTPTGVVSG<br>PAATPTAQHLR] | IPI00009326 65 kDa Yes-associated protein (YAP1)                                                               | YAP1*       | D0/D4 (+/- insulin) score of 8.45 in <b>supplementary table 1</b> . While PKB has been reported to phosphorylate the 14-3-3-binding site at Ser127 (Basu et al (2003) <i>Mol Cell</i> . 11, 11-23), this HxRxx(pS) site does not confirm to the PKB consensus, and more recent data indicate that this site is phosphorylated by LATS kinases (Zhao et al, 2007, <i>Genes and Development</i> , 21:2747-61, Hao et al., 2008, <i>J Biol Chem</i> . 283:5496-509, Lee et al., 2008 <i>Mol Cell Biol</i> . 28:2426-36.). For this reason, YAP1 is not highlighted in Fig 3D. Here, we did not identify phosphoSer127, but did detect two other HxRxx(pS) motifs namely HVRGD(pS <sub>61</sub> )ET and HSRQA(pS <sub>100</sub> )TD, neither of which appears to have been studied in any detail, though they have been reported in phosphoproteomics screens (Dephoure et al (2008) <i>PNAS</i> 105:10762-10767, Beausoleil (2004) <i>PNAS</i> 101:12130-12135). [1] |
| GAQHVR[SHsSPASLQLGTGAGAAGSPAQQHAHLR]Q*                                                                                                                                                                                                               | IPI00180266 WW domain-containing transcription regulator protein 1 (Q9GZV5)                                    | WWTR1 (TAZ) | Kanai F, Marignani PA, Sarbassova D, Yagi R, Hall RA, Donowitz M, Hisaminato A, Fujiwara T, Ito Y, Cantley LC, Yaffe MB. (2000) TAZ: a novel transcriptional co-activator regulated by interactions with 14-3-3 and PDZ domain proteins. <i>EMBO J</i> . 19, 6778-6791. This protein is related to YAP1 (row above in this table). [97]                                                                                                                                                                                                                                                                                                                                                                                                                                                                                                                                                                                                                           |
| RELRR[RmsDEFVDSFK]K<br>RSR[HSsYPAGTEDDEmGEEPSPF]R]G                                                                                                                                                                                                  | IPI00024291 Bcl2 antagonist of cell death                                                                      | BAD         | When Bad is phosphorylated at Ser112, Ser136 or Ser155 by PKA, PKB and/or Pim kinases, it binds to 14-3-3 protein in the cytosol thereby preventing binding to Bcl-2/Bcl-xL, promoting cell survival. Datta et al (1997) Akt phosphorylation of BAD couples survival signals to the cell-intrinsic death machinery, <i>Cell</i>                                                                                                                                                                                                                                                                                                                                                                                                                                                                                                                                                                                                                                   |

|                                                                                                                                               |                                                                                   |          |                                                                                                                                                                                                                                                                                                                                                                                                                   |
|-----------------------------------------------------------------------------------------------------------------------------------------------|-----------------------------------------------------------------------------------|----------|-------------------------------------------------------------------------------------------------------------------------------------------------------------------------------------------------------------------------------------------------------------------------------------------------------------------------------------------------------------------------------------------------------------------|
|                                                                                                                                               |                                                                                   |          | 91, 231–241. Madonald et al (2006) Pim kinases phosphorylate multiple sites on Bad and promote 14-3-3 binding and dissociation from Bcl-XL. BMC Cell Biol. 7,1. [70]                                                                                                                                                                                                                                              |
| K[LDQPVSAPP]PR]D<br>R[ILQEKLDPV]APPsPR]D                                                                                                      | IPI00000634 Coiled-coil domain-containing protein 6                               | CCDC6*   | D0/D4 (+/- insulin) score of 6.85 in <b>supplementary table 1</b> . Insulin-stimulated binding to 14-3-3s confirmed (other work in this study). [65]                                                                                                                                                                                                                                                              |
| RTR[AYsGSDLPSSSSGGANGTAGGGGAR]A<br>R[FPAQVPSAHQP]ASGGAAAAAAPAAPAAPR]S                                                                         | IPI00293427 zinc finger/RING finger 2 (E3 ubiquitin ligase)                       | ZNRF2*   | D0/D4 (+/- insulin) score of 2.7 in <b>supplementary table 1</b> . Other work in this study. [40]                                                                                                                                                                                                                                                                                                                 |
| SCALR[RNEsLTATDGLR]<br>RLAER[AAsQGSDSPLLPAQR]<br>PPPAPPSKPK[EAEEGPTGASESOD]PR]<br>EGSRR[(SS)DLITLPATTPPCPTKK]<br>PIAKK[EIsLPILCNASNGSAVGVPR*] | IPI00456943 SH3 multiple domains 1 = Tks5/Fish (NP_055446)                        | SH3PXD2A | [35]                                                                                                                                                                                                                                                                                                                                                                                                              |
| EVKAR[SQsGTLDGESAAWSASGEDSR]G<br>PIER[VV(SS)EGGRPSVDLSFQPSQPLSK]S                                                                             | IPI00028493 Isoform 1 of Tuberin (TSC2)                                           | TSC2     | 14-3-3-binding to TSC2 at pSer1210, not a PKB site (Li Y, Inoki K, Yeung R, Guan KL. Regulation of TSC2 by 14-3-3 binding. J Biol Chem. 2002 Nov 22;277(47):44593-44596). 14-3-3-binding promoted by PKB/Akt (Nellist, M., Goedbloed, M. A., De, Winter, C., Verhaaf, B., Jankie, A., Reuser, A. J., Van Den Ouweland, A. M., Van Der Sluijs, P., and Halley, D. J. (2002) J. Biol. Chem. 277, 39417-39429). [78] |
| TSWRR[TNsDSALHQSTmTPTQPESFSSGSQDVHQB]<br>TSWR[R]NSDSALHQSTmTPTQPESFSSGSQDVHQB]                                                                | IPI00303383 Isoform 3 of CREB-regulated transcription coactivator 1               | CRTC1    | [140]                                                                                                                                                                                                                                                                                                                                                                                                             |
| R[RVPL]PLSLLAGPADAR]R<br>K[QF]PTmSPTLSSITQGVPLDTSK]L<br>THCSR[HGsGPNILTDSSPGFSK]E<br>R[VPL]PLSLLAGPADAR]R                                     | IPI00639850 Transducer of regulated cAMP response element-binding protein (TORC2) | CRTC2    | 14-3-3-binding reported via a novel PKB/SIK2 pathway (Dentin et al (2007) Insulin modulates gluconeogenesis by inhibition of the coactivator TORC2. Nature. 449, 366-369), but also by the LKB1/(AMPK/SIK) pathway Katoh et al (2006) Silencing the constitutive active transcription factor CREB by the LKB1-SIK signaling cascade. FEBS J. 273, 2730-2748). [7]                                                 |
| R[LFSL]NPSLSTTNLSGPSR]R<br>R[RQPPV]PLTLSPGPEAHQGFSR]Q                                                                                         | IPI00431698 68 kDa protein                                                        | CRTC3    | [21]                                                                                                                                                                                                                                                                                                                                                                                                              |
| K[APSATSP]GQLPHHSSTQPLDLAPGR]M                                                                                                                | IPI00735239 Similar to Ataxin-1                                                   | ATXN1L   | Chen et al (2003) Interaction of Akt-phosphorylated ataxin-1 with 14-3-3 mediates neurodegeneration in spinocerebellar ataxia type 1. Cell. 113, 457-468. The protein identified here is NOT ataxin-1 itself, and does not have the Akt/PKB site described in Chen et al (2003). [137]                                                                                                                            |

|                                                                                                                                                          |                                                                                                                                  |          |                                                                                                                                                                                                                                                                                                                                                                                                                                                                                                                                                                                                         |
|----------------------------------------------------------------------------------------------------------------------------------------------------------|----------------------------------------------------------------------------------------------------------------------------------|----------|---------------------------------------------------------------------------------------------------------------------------------------------------------------------------------------------------------------------------------------------------------------------------------------------------------------------------------------------------------------------------------------------------------------------------------------------------------------------------------------------------------------------------------------------------------------------------------------------------------|
| RSYR[RVsGDAAQDLDR]G                                                                                                                                      | IPI00464978 Insulin receptor substrate 2                                                                                         | IRS2*    | This study. D0/D4 (+/- insulin) score of 11.24 in <b>supplementary table 1. [125]</b>                                                                                                                                                                                                                                                                                                                                                                                                                                                                                                                   |
| TPTAR[SsPPLPPPAEER]T<br>SAPPPK[AQsVpVQAPPPGSAQLLPK]V<br>R[VPGQGLENRGEPPTPpPAPAPAVAPGGSSSESSGR]A                                                          | IPI00045360 Protein capicua homolog Q96RK0                                                                                       | CIC      | In Olsen et al (2006) Global, in vivo, and site-specific phosphorylation dynamics in signaling networks. Cell. 127, 635-648 (pSer279 and pSer1462) <b>[92]</b>                                                                                                                                                                                                                                                                                                                                                                                                                                          |
| ADDSPSQLSK[WPGSPsSR]G<br>GGGR[AGsAmAIGGGGSGTLGSGLLLEDSAR]V                                                                                               | IPI00012856 Forkhead box protein O3A                                                                                             | FOXO3    | <b>[114]</b>                                                                                                                                                                                                                                                                                                                                                                                                                                                                                                                                                                                            |
| KLSRK[AIsSANLLVRS]S<br>SERPRQKLSR[KAIIsSANLLVR]<br>AGPAPATPSR[TPsLSPASSLDV]<br>GKDASIFQWR[VLGAGGAGPAPATPsSR]<br>GKDASIFQWR[VLGAGGAGPAPAIpsRTPSLSPASSLDV] | IPI00167909 echinoderm microtubule associated protein like 3 (ELP95/ELM3)                                                        | EML3*    | D0/D4 (+/- insulin) score of 1.7 in <b>supplementary table 1</b> . Binds to 14-3-3-Sepharose in extracts of serum-stimulated, but not unstimulated, HeLa cells (Pozuelo Rubio et al (2004) 14-3-3 affinity purification of over 200 human phosphoproteins reveals new links to regulation of cellular metabolism, proliferation and trafficking. Biochem J. 379, 395-408). Also identified in Jin et al (2004) Proteomic, functional, and domain-based analysis of in vivo 14-3-3 binding proteins involved in cytoskeletal regulation and cellular organization. Curr Biol. 14, 1436-1450. <b>[12]</b> |
| PLSR[TRsEPLPPSATAPPPGPmQPR]<br>TPAR[tLPFTTGLIYDsVMLK]<br>PLSR[AQsSPAAPASLSAPEPASQAR]<br>AKPSEKPRLR[QIPsAEDLETDGGGPGQVVDDGLEHR]                           | IPI00386808 HDAC7A protein                                                                                                       | HDAC7    | Kao et al (2001) Mechanisms for nucleocytoplasmic shuttling of histone deacetylase 7. J. Biol. Chem 276, 47496-47507; Li et al (2004) Phosphorylation of the histone deacetylase 7 modulates its stability and association with 14-3-3 proteins. J. Biol. Chem. 279, 34201-34208. <b>[13]</b>                                                                                                                                                                                                                                                                                                           |
| RLGLR[KTGsYGALAE]<br>RLGLR[KIsGSYGALAEITASK]<br>RSRQARQSR[SIQGVTLTDLQEAEK]<br>LAYVAPTIPR[RLAsTSDIEEKENR]<br>ARQSR[RSIQGVTLTD]                            | IPI00183002 Isoform 1 of Protein phosphatase 1 regulatory subunit 12A = PP1 smooth muscle regulatory subunit M110 (O14974) MYPT1 | PPP1R12A | Koga Y, Ikebe M. (2008) A Novel Regulatory Mechanism of Myosin Light Chain Phosphorylation via Binding of 14-3-3 to Myosin Phosphatase. Mol Biol Cell. 19, 1062-1071. <b>[8]</b>                                                                                                                                                                                                                                                                                                                                                                                                                        |
| R[AAHTEDINACTLTTsPR]L<br>RQR[STsTPNVHmVSTTLPVDSR]M<br>SQRQR[SsTPNVHmVSTTLPVDSR]                                                                          | IPI00021786 RAF proto-oncogene serine/threonine-protein kinase (c-Raf)                                                           | RAF1     | Well-characterised 14-3-3-regulated protein, reviewed in Wilker E and Yaffe MB (2004) 14-3-3 proteins – a focus on cancer and human disease. J. Mol. Cell Cardiol. 37, 633-642. <b>[100]</b>                                                                                                                                                                                                                                                                                                                                                                                                            |
| LTRLR[RTEsVPSDINNPVDR]A*                                                                                                                                 | IPI00013384 Isoform 2 of Kinase suppressor of ras-1 (KSR)                                                                        | KSR1     | The phosphoserine residue identified here is one of the sites known to mediate 14-3-3-binding to KSR (Cacace et al (1999) Identification of constitutive and ras-inducible phosphorylation sites of KSR: implications for 14-3-3 binding, mitogen-activated protein kinase binding, and KSR overexpression. Mol Cell Biol. 19, 229-240).                                                                                                                                                                                                                                                                |



|                                                                                                                                                                              |                                                             |              |                                                                                                                                                                                                                                                                                                                                                                                                                                                                                                                                                                                                                                                                                                                           |
|------------------------------------------------------------------------------------------------------------------------------------------------------------------------------|-------------------------------------------------------------|--------------|---------------------------------------------------------------------------------------------------------------------------------------------------------------------------------------------------------------------------------------------------------------------------------------------------------------------------------------------------------------------------------------------------------------------------------------------------------------------------------------------------------------------------------------------------------------------------------------------------------------------------------------------------------------------------------------------------------------------------|
|                                                                                                                                                                              |                                                             |              | <b>[110]</b>                                                                                                                                                                                                                                                                                                                                                                                                                                                                                                                                                                                                                                                                                                              |
| SSKR[RS <sub>1</sub> LPNGEGLQLK]E*                                                                                                                                           | IPI00736251 PREDICTED: similar to protein phosphatase 1H    | <b>PPM1H</b> | Zhang et al (1997) Serine phosphorylation-dependent association of the band 4.1-related protein-tyrosine phosphatase PTPH1 with 14-3-3beta protein. J Biol Chem. 272, 27281-27287. <b>[109]</b>                                                                                                                                                                                                                                                                                                                                                                                                                                                                                                                           |
| QEPPNPRMKR[AS <sub>1</sub> LNFLNK]<br>NPRMK[RAS <sub>1</sub> LNFLN]<br>LSDSR[TLSS(S)SMD]                                                                                     | IPI00021634 Kinesin light chain 2                           | <b>KLC2</b>  | * Kinesin heavy chains (KIF5A and KIF5B) bind to KLCs and had D0/D4 (+/- insulin) scores of 2.16 and 1.99, respectively in <b>supplementary table 1</b> ). Direct binding to 14-3-3 involves phosphorylation at RASsLNFLN (Ichimura et al (2002) Phosphorylation-dependent interaction of kinesin light chain 2 and the 14-3-3 protein. Biochemistry. 41, 5566-5572; Pozuelo Rubio et al (2004) 14-3-3-affinity purification of over 200 human phosphoproteins reveals new links to regulation of cellular metabolism, proliferation and trafficking. Biochem J. 379, 395-408). <b>[42]</b>                                                                                                                               |
| QVSR[GLS <sub>1</sub> ASTMDLSS]<br>NMKR[AA <sub>1</sub> LNFLNQP]<br>EPRPSSSNMK[RAA <sub>1</sub> LNFLNQPAAAPLQVSR]                                                            | IPI00398812 Kinesin light chain 4                           | <b>KLC4</b>  | See KLC2. <b>[9]</b>                                                                                                                                                                                                                                                                                                                                                                                                                                                                                                                                                                                                                                                                                                      |
| AGMKR[AM <sub>1</sub> LNTLNVDAPR]<br>EAAAGAAGMK[RAM <sub>1</sub> LNTLNVDAPR]<br>SPPR[RD <sub>1</sub> LASLFPSEEEER]                                                           | IPI00465074 Isoform 3 of Kinesin light chain 3              | <b>KLC3</b>  | See KLC2. <b>[15]</b>                                                                                                                                                                                                                                                                                                                                                                                                                                                                                                                                                                                                                                                                                                     |
| LADSR[ALSA <sub>1</sub> HTDLAH]<br>EEMKR[A(SS)LNVLNVGGK]<br>SGPDGGEEMK[RA(SS)LNVLNVGGK]                                                                                      | IPI00337465 Isoform P of Kinesin light chain 1              | <b>KLC1</b>  | See KLC2. Need not be isoform P. Could be a longer isoform. <b>[33]</b>                                                                                                                                                                                                                                                                                                                                                                                                                                                                                                                                                                                                                                                   |
| DIRR[RL <sub>1</sub> EQLAHTPTAFK]R<br>NLKR[TA <sub>1</sub> SNPKVENEDPVR]L<br>RSTR[ <sub>1</sub> VENLPECGITHEQR]A<br>R[STR <sub>1</sub> VENLPECGITHEQR]A (same site as above) | IPI00165547 Isoform 2 of Phosphatidylinositol 4-kinase beta | <b>PI4KB</b> | The mammalian and S. cerevisiae (Pik1) versions bind to 14-3-3s. Hausser et al. (2006). Phospho-specific binding of 14-3-3 proteins to phosphatidylinositol 4-kinase III beta protects from dephosphorylation and stabilizes lipid kinase activity. J. Cell Sci 119, 3613–3621; Hausser et al. (2005). Protein kinase D regulates vesicular transport by phosphorylating and activating phosphatidylinositol-4 kinase IIIbeta at the Golgi complex. Nat. Cell Biol 7, 880–886; Demmel et al (2008) Nucleo-cytoplasmic Shuttling of the Golgi Phosphatidylinositol 4-Kinase Pik1 Is Regulated by 14-3-3 Proteins and Coordinates Golgi Function with Cell Growth. Mol Biol Cell. Mol Biol Cell. 19, 1046-1061. <b>[57]</b> |

|                                                                                                                           |                                                                                                  |                       |                                                                                                                                                                                                                                                                                                                                                                           |
|---------------------------------------------------------------------------------------------------------------------------|--------------------------------------------------------------------------------------------------|-----------------------|---------------------------------------------------------------------------------------------------------------------------------------------------------------------------------------------------------------------------------------------------------------------------------------------------------------------------------------------------------------------------|
| RPLSR[AQ(SS)PASATFPVSVQEPPTKPR]                                                                                           | IPI00010088 Histone deacetylase 4                                                                | HDAC4                 | Wang et al (2000) Regulation of histone deacetylase 4 by binding of 14-3-3 proteins. Mol Cell Biol. 20, 6904-6912; Grozinger CM, Schreiber SL. (2000) Regulation of histone deacetylase 4 and 5 and transcriptional activity by 14-3-3-dependent cellular localization. Proc Natl Acad Sci U S A. 97, 7835-7840). [37]                                                    |
| RQQGK[SLSPTDNLELSLR]S                                                                                                     | IPI00384861 Isoform 1 of ARF GTPase-activating protein GIT1                                      | GIT1                  | Angrand et al (2006) Transgenic mouse proteomics identifies new 14-3-3-associated proteins involved in cytoskeletal rearrangements and cell signaling. Mol Cell Proteomics. 5, 2211-2227. [60]                                                                                                                                                                            |
| RIRR[RGDIDNPTLTVmDISPPSR]S                                                                                                | IPI00513803 Mitogen-activated protein kinase kinase kinase 2 (MEKK2; MAP3K2)                     | MAP3K2                | Fanger et al (1998) 14-3-3 proteins interact with specific MEK kinases. J Biol Chem. 273, 3476-83. [107]                                                                                                                                                                                                                                                                  |
| K[ASQAGDINTIYQPPEPR]S                                                                                                     | IPI00017801 mitogen-activated protein kinase kinase kinase 3 isoform 2                           | MAP3K3                | Fritz et al (2006) Phosphorylation of serine 526 is required for MEKK3 activity, and association with 14-3-3 blocks dephosphorylation. J Biol Chem. 281, 6236-6245; Chun et al (2003) Inhibition of mitogen-activated kinase kinase kinase 3 activity through phosphorylation by the serum- and glucocorticoid-induced kinase 1. J Biochem. 133, 103-108. (Ser166). [127] |
| R[VLDTSSLTQSAPASPTNK]G<br>R[VLDTSSLTQAPASPTNK]G                                                                           | IPI00166044 Isoform 1 of Regulatory-associated protein of mTOR                                   | Raptor (No HGNC name) | Gwinn et al (2008) AMPK phosphorylation of raptor mediates a metabolic checkpoint. Mol Cell. 30, 214-226. [87]                                                                                                                                                                                                                                                            |
| GIMR[RGEsLDNLDSR]S<br>RQR[SAsVNKEPVSLPGImR]R<br>SASLPRSYRK[TDTVRLTmVVTPRPFGSQTR]                                          | IPI00291802 Isoform 3 of LIM domain only protein 7                                               | LMO7*                 | D0/D4 (+/- insulin) score of 3.51 in <b>supplementary table 1</b> . [20]                                                                                                                                                                                                                                                                                                  |
| RLR[RVAALLLR]S<br>R[LPARELAPAR]L                                                                                          | IPI00022240 Isoform 1 of NifU-like N-terminal domain-containing protein, mitochondrial precursor | ISCU                  | [85]                                                                                                                                                                                                                                                                                                                                                                      |
| MIHR[STsQGSINSPVYSR]H<br>SPR[(TLS)PTPSAEGYQDVR]D<br>MKR[R(SS)GREEDDEELLR]R<br>K[QHAALAAQSKsSEDIK]F<br>MRMDR[GVsmPNmLEPK]* | IPI00329495 Isoform 1 of Actin-binding LIM protein 1 (abLIM-1)                                   | ABLIM1                | [25]                                                                                                                                                                                                                                                                                                                                                                      |
| VRMR[NQsLGQSAPSLTAGLK]E                                                                                                   | IPI00480046 Microtubule-                                                                         | MAST2                 | [68]                                                                                                                                                                                                                                                                                                                                                                      |

|                                                                                                                                                                                                                                                                                                                                                                                    |                                                                                               |          |                                                                                                                                                                                                                                                                                                                                              |
|------------------------------------------------------------------------------------------------------------------------------------------------------------------------------------------------------------------------------------------------------------------------------------------------------------------------------------------------------------------------------------|-----------------------------------------------------------------------------------------------|----------|----------------------------------------------------------------------------------------------------------------------------------------------------------------------------------------------------------------------------------------------------------------------------------------------------------------------------------------------|
|                                                                                                                                                                                                                                                                                                                                                                                    | associated serine/threonine-protein kinase 2 (MAST2; MAST205)                                 |          |                                                                                                                                                                                                                                                                                                                                              |
| FPMAR[ <b>S</b> ISTSGPLDKEDTGR]Q<br>RNR[NL <b>S</b> GGVLMGFmLNR]I<br>RKR[HK <b>S</b> DNETNLQQVWGNR]N                                                                                                                                                                                                                                                                               | IPI00396063 Similar to IRLB                                                                   | DENND4A  | [19]                                                                                                                                                                                                                                                                                                                                         |
| RQR[NL <b>S</b> GSTLYPVSNIPR]S                                                                                                                                                                                                                                                                                                                                                     | IPI00640136 Regulatory factor X domain containing 2                                           | RFX7     | (At time of writing, the old gene name RFXDC2 is listed in the IPI database).<br>[39]                                                                                                                                                                                                                                                        |
| VTEVR[IKTEP <b>S</b> SPLSDPSDIIR]V<br>K[IQPLEPD <b>S</b> PTGLSENPTPATEK]L                                                                                                                                                                                                                                                                                                          | IPI00008137 Zinc finger protein 295 Q9ULJ3 (Zinc finger and BTB domain-containing protein 21) | ZNF295   | Also, pSer714 (Olsen et al 2006) Global, in vivo, and site-specific phosphorylation dynamics in signaling networks. Cell. 127, 635-648; Also, pSer411; pSer422; pSer435; pSer983 and pSer1003 in Beausoleil et al (2004) Large-scale characterization of HeLa cell nuclear phosphoproteins. Proc Natl Acad Sci U S A. 101, 12130-12135. [67] |
| DKPEKLYSPK[RIDFTPV <b>S</b> PAPSPTR]<br>DKPEKLYSPK [RIDFTPV <b>S</b> PAP <b>S</b> PTR]<br>DKPEKLYSPK [RIDFTPV <b>S</b> PAP <b>S</b> PTR]<br>APSPTRGFGK[MFVSSSGLP <b>S</b> PVPSPR]<br>DKPEKLYSPK[RIDFTPV <b>S</b> PAPSP <b>R</b> GFGK]<br>DKPEKLYSPK[RIDFTPV <b>S</b> PAPSP <b>R</b> GFGK]<br>RRNSTTIMSR[H <b>S</b> LEEGLDmVNR]E<br>SGLSSDPLAK[GSATA <b>S</b> PVACSNSSCSFILmDDLSPK] | IPI00749302Hypothetical protein DKFZp686L20116                                                | FAM122B* | D0/D4 (+/- insulin) score of 3.46 in <b>supplementary table 1</b> . Related to FAM122A (next in list). The serine residue marked in grey, is similar to the RSNpSAP site found by MS in FAM122A, but was not identified by MS data for FAM122B).<br>1MAQEKMELDLEPDTSYGGTLRRSS <b>S</b> APLIHGLSDLSQVF<br>Q PYTLRTRRN(pS)TTIMSRHSLE60 [4]     |
| RRNSTTFPSR[HGLLLPA <b>S</b> PVR]<br>NDVEKSASP[RIDFIPV <b>S</b> PAPSPTR]<br>NDVEKSASP[RIDFIPV <b>S</b> PAP <b>S</b> PTR]<br>NDVEKSASP[RIDFIPV <b>S</b> PAP <b>S</b> PTR]<br>GSGGGGGLRR[SN <b>S</b> APLIHGLSDTSPVFQAEAPSAR]<br>GGGLR[RSN <b>S</b> APLIHGLSDTSPVFQAEAPSAR]                                                                                                            | IPI00061087 Protein FAM122A                                                                   | FAM122A  | 1MAQEKMELDLELPPGTGGSPAEGGGSGGGGGLRRSN(pS)<br>APLIHGLSDTSPVFQAEAPSARRNSTTFPSRHGLLLPASPVR<br>MHSSRLHQIKQEEGMDLINRETVHEREVQTAMQISHSWEE<br>SFSLSDNDVEKSASPKRIDFIPVSPAPSPTR GIGKQCFSPS<br>[14]                                                                                                                                                    |
| RSCNR[m <b>S</b> HTETSSFLQTLTGR]L<br>K[AAPWGSNP <b>S</b> PSAESTQAmDR]S                                                                                                                                                                                                                                                                                                             | IPI00183572 Isoform 2 of Dedicator of cytokinesis protein 7; (Q96N67)                         | DOCK7    | Listed as KG358 in Pozuelo Rubio et al (2004) 14-3-3-affinity purification of over 200 human phosphoproteins reveals new links to regulation of cellular metabolism, proliferation and trafficking. Biochem J. 379, 395-408.<br>[73]                                                                                                         |

|                                                                                                                                                           |                                                                                                                                         |              |                                                                                                                                                                                                                                                                                                                                                                                                                      |
|-----------------------------------------------------------------------------------------------------------------------------------------------------------|-----------------------------------------------------------------------------------------------------------------------------------------|--------------|----------------------------------------------------------------------------------------------------------------------------------------------------------------------------------------------------------------------------------------------------------------------------------------------------------------------------------------------------------------------------------------------------------------------|
| RHCR[SLsVPVDLSR]W*<br>PPQR[RFsLsPSLGPQASR]F                                                                                                               | IPI00009900 Protein FAM53C (distantly related to a dorsal neural-tube nuclear protein) Q9NYF3                                           | FAM53C       | Beausoleil et al (2004) Large-scale characterization of HeLa cell nuclear phosphoproteins. Proc Natl Acad Sci U S A. 101, 12130-12135.<br><b>[102]</b>                                                                                                                                                                                                                                                               |
| SSRDK[RPLsGPDVGTQPAGLASGAK]L*<br>QESSR[DKRPLsGPDVGTQPAGLASGAK]L                                                                                           | IPI00014068 Isoform 1 of Ser/thr-protein kinase PAK 4                                                                                   | PAK4         | <b>[105]</b>                                                                                                                                                                                                                                                                                                                                                                                                         |
| LRKR[RVsQDLEVEKPDASPTSLQLR]S<br>NKNRR[SLPVSICR]S*                                                                                                         | IPI00304817 SAM and SH3 domain-containing protein 1 (SASH1) (O94885)                                                                    | <b>SASH1</b> | Rimkus et al. (2006) Prognostic significance of downregulated expression of the candidate tumour suppressor gene SASH1 in colon cancer. Br J Cancer. 95, 1419-1423.<br>Benzinger A, Muster N, Koch HB, et al. (2005). Targeted proteomic analysis of 14-3-3 sigma, a p53 effector commonly silenced in cancer. Mol. Cell Proteomics 4, 785–795.<br>Also found to be insulin-regulated in this study.<br><b>[115]</b> |
| EGGSR[RLsLPGLLSQVsPR]L*                                                                                                                                   | IPI00295004 Isoform 1 of Alsin (Amyotrophic lateral sclerosis protein 2) (Q96Q42)                                                       | ALS2         | <b>[118]</b>                                                                                                                                                                                                                                                                                                                                                                                                         |
| KMNGR[KQsLGELIGTLNAAK]V                                                                                                                                   | IPI00451401 Isoform 2 of triosephosphate isomerase (TIM), d-glyceraldehyde 3-phosphate and dihydroxyacetone phosphate during glycolysis | TPI1*        | D0/D4 (+/- insulin) score of 1.7 in <b>supplementary table 1</b> .<br>Knowles JR (1991) Enzyme catalysis: not different, just better. Nature 350, 121-124.<br><b>[132]</b>                                                                                                                                                                                                                                           |
| DPSNR[SNsmLELAPK]V<br>KYDNHVGTSK[QPAQSQNLsPLSGFSR]<br>GAYWNGKLLR[SHSQASLAGPGVPDPSNR]<br>SNSMLELAPK[VAsgPGSTIDTAPLSSVDSLK]                                 | IPI00218136 137 kDa protein (part of something bigger) Cingulin                                                                         | CGN          | <b>[10]</b>                                                                                                                                                                                                                                                                                                                                                                                                          |
| DGLRR[AQsTDSLGL]<br>DNDMFKDGLR[RAQsTDSLGTSGSLQSK]<br>DNDMFKDGLR[RAQsDsLGTSGSLQSK]<br>NEEEHLDSTR[GsvHSLDAGLLLPSGDPFSK]<br>NEEEHLDSTR[GsvHsLDAGLLLPSGDPFSK] | IPI00293009 Isoform 1 of Rab GTPase-binding effector protein 1 (Rabaptin-5) (Rabaptin-5alpha) (Rabaptin-4) (NY-REN-17)                  | RABEP1       | <b>[5]</b>                                                                                                                                                                                                                                                                                                                                                                                                           |
| RILVK[SLsLDPGQSLEPHPEGPQR]<br>EGPQR[LRsDPGPPTETPSQRPSPLK]*                                                                                                | IPI00024312 FYVE, RhoGEF and PH domain-                                                                                                 | FGD1         | <b>[18]</b>                                                                                                                                                                                                                                                                                                                                                                                                          |

|                                                                                                                                |                                                                                                                                                                           |          |                                                                             |
|--------------------------------------------------------------------------------------------------------------------------------|---------------------------------------------------------------------------------------------------------------------------------------------------------------------------|----------|-----------------------------------------------------------------------------|
| GASEPGLLAR[RG]GSALGGPLDPQFVGPSDTSLGAA<br>PGHR]                                                                                 | containing protein 1<br>=Faciogenital dysplasia 1<br>protein (P98174) (Aarskog-<br>Scott syndrome gene)                                                                   |          |                                                                             |
| FKK[RA]LQASTAAPEAR]G<br>K[HFPLDLRT]mDGK]C<br>RLER[Q]QDVKLEPDILLR]A                                                             | IPI00007722 Adenosine<br>monophosphate deaminase                                                                                                                          | AMPD2    | [27]                                                                        |
| RRTKR[HR(ST)PHLDGAGGGAAGEDGDLGLGSAR*]<br>A                                                                                     | IPI00022107 PREDICTED:<br>similar to leucine rich repeat<br>and fibronectin type III<br>domain containing 1                                                               | LRFN1    | [51]                                                                        |
| PLKR[(SSS)ETILSSLAGSDIVK]G                                                                                                     | IPI00009862 Cerebellar<br>degeneration-related protein<br>2 Q01850(Paraneoplastic<br>cerebellar degeneration-<br>associated antigen) (Major<br>Yo paraneoplastic antigen) | CDR2     | [52]                                                                        |
| R[LEAAEAAGGASPD]PPER]G<br>R[GAGDDTEPPAAPARPR]PR]A<br>R[LAEPVVATPALVAAAPT]PDHSPA                                                | IPI00420019 Isoform 1 of<br>Protein Dos                                                                                                                                   | C19orf26 | [76]                                                                        |
| K[FATL]LHDR]K                                                                                                                  | IPI00290950 isoform 2 of<br>WD repeat domain 20                                                                                                                           | WDR20*   | D0/D4 (+/- insulin) ratio of 1.54 in <b>supplementary table 1</b> .<br>[81] |
| YQISR[GN]DGYIIPINK]E<br>R[DSLTY]mPNLR]                                                                                         | IPI00017562 Isoform 2 of<br>Latrophilin-2<br>precursor O95490 Calcium-<br>independent alpha-<br>latrotoxin receptor 2<br>(Lectomedin-1)                                   | LPHN2    | [84]                                                                        |
| ENFAR[AN]DIISLNR]S                                                                                                             | IPI00478176 hypothetical<br>protein LOC90362<br>NP_671722                                                                                                                 | FAM110B  | [89]                                                                        |
| PPPKVNPWTK[NALPPVLTTVNGQ]PPEHSAPAK]<br>RKRKTR[HS]NPPLESHVGVVmDSR]E<br>HKEGTGQQR[ESPRPLQLPGAEGPAIS]DGEEGGGEP<br>GAGGGAAGAAGAGR] | IPI00185919 Isoform 1 of<br>La-related protein 1                                                                                                                          | LARP1    | [94]                                                                        |
| K[ELLTSD]PPHNDImTPVDPGVAQPNSR]V                                                                                                | IPI00289866 Forkhead box<br>protein O1A                                                                                                                                   | FOXO1    | [95]                                                                        |

|                                                                                                      |                                                                      |          |                                                                              |
|------------------------------------------------------------------------------------------------------|----------------------------------------------------------------------|----------|------------------------------------------------------------------------------|
| RMNAR[YQ]QPVTLGEVEQVQSGK]L*                                                                          | IPI00018370 Isoform 2 of Supervillin                                 | SVIL     | [99]                                                                         |
| LSSVLR[RS]FSEGQTLTVTSGAK]K                                                                           | IPI00060439 KIAA0226 protein (Fragment)                              | KIAA0226 | [101]                                                                        |
| RISR[S]LGDSEGPVATLAQPLR]                                                                             | IPI00386732 R34001_1                                                 | WDR62    | [108]                                                                        |
| AGHR[RTP]EADRWLEEVSK]S<br>AGHR[R]PSEADRWLEEVSK]S                                                     | IPI00028059 Isoform 1 of Protein numb homolog                        | NUMB     | [116]                                                                        |
| GLQR[SAS]SSWLEGTSTQAK]E                                                                              | IPI00014340 Myosin binding subunit 85                                | PPP1R12C | [120]                                                                        |
| VNGR[KT]LDVSNSEAPGFLAPGAR]S                                                                          | IPI00171636 Neuron navigator 1 (NAV1)                                | NAV1     | [124]                                                                        |
| KIPGR[RN]RTEEPTVASESVENGHR]K<br>TLLK[mTS]PVGPGTASAGPSLPGGALPTSVR]S<br>R[ATPVQLPSPPC]SSPVVPSHPPVQVK]E | IPI00179071 Nuclear receptor coactivator 6                           | NCOA6    | [38]                                                                         |
| M[SRGP]SAVLPSALG]sR]K<br>KLGPR[SL]CLSDLGGVALEPR]A                                                    | IPI00006682 Protein phosphatase 1 regulatory subunit 3D              | PPP1R3D  | [45]                                                                         |
| R[AQTPISSLP]SPSDEVGR]R<br>DPSSR[LS]SPPPPAIAVPLLEmGFSLR]Q<br>QQR[RV]STDLPEGQDVYTAACNSVIHR]C           | IPI00022479 guanine nucleotide exchange factor p532                  | HERC1    | [47]                                                                         |
| QPRRR[S]IQDLTVTGTEPGQVSSR]S<br>R[RR]IQDLTVTGTEPGQVSSR]S (same site as above)                         | IPI00218566 Mitogen-activated protein kinase kinase kinase 7         | MAP3K7   | [50]                                                                         |
| EFFR[AN]TSDSVFTETPSPVLK]N                                                                            | IPI00294391 Cdc42 effector protein 3                                 | CDC42EP3 | [56]                                                                         |
| R[APSLPAPPYAGAPG]PR]T<br>R[QSQESLPGAV]PLSGR]R<br>PLSR[RN]APEAQESGPPSGLR]Q                            | IPI00465409 ankyrin repeat domain 34                                 | ANKRD34A | [62]                                                                         |
| RALSR[QL]SGVSEIR]H                                                                                   | IPI00025512 Heat-shock protein beta-1                                | HSPB1*   | D0/D4 (+/- insulin) score of 2.72 in <b>supplementary table 1</b> .<br>[119] |
| NAMR[VL(ST)STDLEAAVADALK]K<br>K[ECDIVSRDGGGAASPA]EGR]G                                               | IPI00396279 CLIP-associating protein 1                               | CLASP1   | [121]                                                                        |
| PLSSR[S]APASPTHPHLmSPR]                                                                              | IPI00556645 forkhead box K1                                          | FO XK1*  | D0/D4 (+/- insulin) score of 0.34 in <b>supplementary table 1</b> .<br>[34]  |
| R[RSPSV(SS)PEPAEK]S<br>K[mALPPQEDATA]PPR]Q<br>K[AGmSSNQSIS]PVLDAVPR]T                                | IPI00782992 Isoform 1 of Serine/arginine repetitive matrix protein 2 | SRRM2    | [53]                                                                         |

|                                                                                           |                                                                                       |          |                                                                                                        |
|-------------------------------------------------------------------------------------------|---------------------------------------------------------------------------------------|----------|--------------------------------------------------------------------------------------------------------|
| SPEHK[ELNSPLR]                                                                            |                                                                                       |          |                                                                                                        |
| R[HTPPTIGGLPYR]R                                                                          | IPI00299588 ArgBPIB protein (abl interactor 2)                                        | ABI2     | [75]                                                                                                   |
| K[HSL(SS)GGFSPVAGVGAQGDYQRPHSAQPADR]G                                                     | IPI00337612 Discoidin, CUB and LCCL domain-containing protein 1 precursor             | DCBLD1   | [117]                                                                                                  |
| FGKPDGLRGR[GVGPEPGPTAPYLGR]K[LLRQSPPLPGREEEPGLGDSGIQSTPGSGHAPR]T                          | IPI00216546 Isoform 2 of Probable palmitoyltransferase ZDHHC5                         | ZDHHC5   | [122]                                                                                                  |
| KDLLDAGFKR[KVAVYIIVDESNVK]VPLRR[RHSEQVANGPTPPPR]                                          | IPI00419166 hypothetical protein LOC644815 (has a Phospholipase D domain)             | FAM83G   | [134]                                                                                                  |
| LHK[QQSLPLRPIIPLVAR]I *                                                                   | IPI00002515 TBC1 domain family member 22B EAX03940                                    | TBC1D22B | [142]                                                                                                  |
| SLSPK[STSPPSPEVWADSR]*                                                                    | IPI00216633 Isoform Short of Dematin (Erythrocyte membrane protein band 4.9) (Q08495) | EPB49    | [143]                                                                                                  |
| QPR[RAAPTTPPPPVK]                                                                         | IPI00009319 Isoform 1 of SH3 adapter protein SPIN90 (Q9NZQ3)                          | NCKIPSD  | [144]                                                                                                  |
| R[IHRASDPGLPAEEPK]PDGRFHLPPR[IHRASDPGLPAEEPKEK]                                           | IPI00301263 CAD protein                                                               | CAD*     | D0/D4 (+/- insulin) score of 2.7 (band 2) and 6.66 (band 1) in <b>supplementary table 1</b> .<br>[145] |
| R[VTNDIPEsSPGVGR]R<br>R[YmSQmVPEQAELEK]L                                                  | IPI00031376 PCM1 protein                                                              | PCM1     | [147]                                                                                                  |
| R[GLSDHVSLDGQELGTR]S<br>QVPGGR[EIPQGELRPEVVEDEVPRSPVAEEPGGGSSSSEAK]L                      | IPI00028359 Hypothetical protein DKFZp761F0123                                        | SH3BP5L  | [22]                                                                                                   |
| R[ALVHQLNESR]L<br>R[IHAESLLLDPAVAK]S<br>R[LH(SS)NPNLSTLDFGEEK]N<br>K[QLmEQDASSPSAQVIGLK]N | IPI00169296 Isoform 2b of Oxysterol-binding protein-related protein 3                 | OSBPL3   | [24]                                                                                                   |
| R[GPVQHVVEAPDGAAAAASGSLDSFSR]G                                                            | IPI00552905 Isoform 1 of                                                              | PRRT3    | [46]                                                                                                   |

|                                                                                            |                                                                               |                    |                                                                                                                                                                                          |
|--------------------------------------------------------------------------------------------|-------------------------------------------------------------------------------|--------------------|------------------------------------------------------------------------------------------------------------------------------------------------------------------------------------------|
| GRCRSLSDVVR[VRGPVVPQHVVVEAPDGAAAAASG]SL<br>DSFSR]                                          | Proline-rich transmembrane protein 3                                          |                    |                                                                                                                                                                                          |
| R[QAGAPGGSSGSGG]PELSALR]L                                                                  | IPI00032236 Isoform 2 of Angiomotin-like protein 2                            | AMOTL2             | [63]                                                                                                                                                                                     |
| K[LQELASPPAGRP]PAPR]K<br>R[VEQmPQA]PGLAPR]T                                                | IPI00174962 Molecule interacting with Rab13                                   | MICALL1*           | MICALL1 had an off-scale D0/D4 score (L), meaning that it was only found in the preparation from insulin-stimulated cells in <b>supplementary table 1</b> . [83]                         |
| R[GGISVQVNSIKFD]E]-                                                                        | IPI00216654 Isoform Beta of Nucleolar phosphoprotein p130                     | NOLC1              | [88]                                                                                                                                                                                     |
| M[PCSEETPAI]PSKR]A                                                                         | IPI00375015 Isoform DUT-N of Deoxyuridine 5'-triphosphate nucleotidohydrolase | DUT*               | D0/D4 (+/- insulin) score of 1.44 in <b>supplementary table 1</b> . Phosphorylated site is in N-terminus of nuclear form (splice variant), and not in mitochondrial splice variant. [91] |
| AVTK[AS]FSGISVLTR]G                                                                        | IPI00014214 R3H domain protein 1                                              | R3HDM1             | [93]                                                                                                                                                                                     |
| VRSMRPPVTK[AS]FSGISILTR]                                                                   | IPI00007227 R3H domain containing 2                                           | R3HDM2             | [48]                                                                                                                                                                                     |
| R[RTDGGSTA]LGGEIK]G                                                                        | IPI00747018 Sodium- and chloride-dependent creatine transporter 2             | CT2 (no HGNC name) | This has been reported as a pseudogene. [96]                                                                                                                                             |
| R[DFTNEAPPAPLPDASA]PLSPHR]R<br>SEKRAFPRKR[DFTNEAPPAPLPDASA]PL]PHRR]<br>R[mEVDR]PGLPmSDLK]T | IPI00295457 myosin phosphatase-Rho interacting protein isoform 1              | M-RIP              | [98]                                                                                                                                                                                     |
| K[VGmFEAHIQAQSSAIQAPR]PR]L                                                                 | IPI00021449 Isoform 1 of Inositol-trisphosphate 3-kinase B                    | ITPKB              | [133]                                                                                                                                                                                    |
| K[S(SS)PAPADIAQTVQEDLR]T                                                                   | IPI00012442 Ras-GTPase-activating protein-binding protein 1                   | G3BP1              | [138]                                                                                                                                                                                    |
| K[SMNKSIHIVVTMAKSLN]VENK]I                                                                 | IPI00012469 Signaling lymphocytic activation molecule precursor               | SLAMF1             | [148]                                                                                                                                                                                    |
| R[QHEAPSNRPLNELLPQGP]PR]T                                                                  | IPI00020578 ARAF protein                                                      | ARAF               | [149]                                                                                                                                                                                    |
| K[QPEtAAALA]SGSVVSSvPKAQR]N                                                                | IPI00216664 Isoform 6 of CKLF-like MARVEL                                     | CMTM1              | [150]                                                                                                                                                                                    |



|                                                                                                                         |                                                                        |           |       |
|-------------------------------------------------------------------------------------------------------------------------|------------------------------------------------------------------------|-----------|-------|
|                                                                                                                         | transmembrane domain-containing protein 1                              |           |       |
| K[ATSEIFH <sub>s</sub> QSFLATGSNLR]K                                                                                    | IPI00153055 Isoform 2 of Septin-10                                     | SEPT10    | [103] |
| R[DQLSQNVHALV <sub>s</sub> FR]R                                                                                         | IPI00414743 SH2 domain containing 5                                    | SH2D5     | [104] |
| TLNFGPEWLR[ALSSGGSIT <sub>s</sub> PPLSPALPK]<br>YAQVLAQQQK[AAL(SS)QQQQQLALLLQQFQTLK]                                    | IPI00784233 Grb10 interacting GYF protein 2                            | GIGYF2    | [26]  |
| PPGFAPLAPR[LGPELSPSPTSP <sub>s</sub> ATSTTPSR]                                                                          | IPI00000893 Zinc finger protein 36                                     | ZFP36     | [55]  |
| LRLGAPEAR[RSATLSG <sub>s</sub> ATNLASLTAALAK]<br>GLRLGAPEAR[RSATLSG <sub>s</sub> ATNLASLTAALAK]                         | IPI00021753 kinesin family member 13B                                  | KIF13B    | [61]  |
| ESPSLDPGRR[LPIFSRL <sub>s</sub> ISDD]<br>SEPSLDPGR[RLPIFSRL <sub>s</sub> ISDD]                                          | IPI00026947 Zinc finger protein 36                                     | ZFP36L2   | [74]  |
| FLQSLECLRR[S <sub>s</sub> QSLSLQR]E<br>SPMEEEEKAKK[SFLQ <sub>s</sub> LECLR]R<br>LQREQLSSCK[LRN <sub>s</sub> LDSSSDSAL]. | IPI00398347 protein AG2 homolog                                        | LOC387763 | [86]  |
| PRPPQPKKSK[KASGSGGG <sub>s</sub> AALGPSFGPSGGSGTK<br>LPK]                                                               | IPI00014414 bromodomain containing 2                                   | BRD2      | [123] |
| DIKKSPDGTR[VVGKCGGYCGKCTPSSG <sub>s</sub> GLEVR]                                                                        | IPI00386763 ADAM metalloproteinase with thrombospondin type 1 motif, 9 | ADAMTS9   | [141] |
| RSLLEGQDAK[MIGFPSSAGSV <sub>s</sub> PR]                                                                                 | IPI00009866 Isoform 1 of Keratin 13                                    | KRT13     | [59]  |

| Band num | prot_hit | nu_prot | prot_acc    | prot_desc              | pep_exp_mz             | pep_exp_n  | pep_exp_z | quantific | average | stdev | pep_calc_mr | pep_score   | pep_seq     | light m/z           | heavy m/z   | light intensity | heavy intensity | ratio light/heavy |      |  |
|----------|----------|---------|-------------|------------------------|------------------------|------------|-----------|-----------|---------|-------|-------------|-------------|-------------|---------------------|-------------|-----------------|-----------------|-------------------|------|--|
| 1        | 1        | 1       | IPI00289334 | Isoform 1 of Filamin-B | 477.290727             | 952.5669   | 2         | 3         | 2.15    | 0.24  | 952.572983  | 47.15       | AGLAPLEVR   |                     |             |                 |                 |                   |      |  |
| 1        | 1        | 1       |             |                        | 477.290785             | 952.567    | 2         |           |         |       |             | 952.572983  | 50.58       | AGLAPLEVR           |             |                 |                 |                   |      |  |
| 1        | 1        | 1       |             |                        | 506.299693             | 1010.585   | 2         |           |         |       |             | 1010.589676 | 52.47       | IAGPGLGSGVR         |             |                 |                 |                   |      |  |
| 1        | 1        | 1       |             |                        | 510.750342             | 1019.486   | 2         |           |         |       |             | 1010.589676 | 69.88       | IAGPGLGSGVR         |             |                 |                 |                   |      |  |
| 1        | 1        | 1       |             |                        | 510.750649             | 1019.487   | 2         |           |         |       |             | 1019.494812 | 26.18       | YADEEIPR            |             |                 |                 |                   |      |  |
| 1        | 1        | 1       |             |                        | 532.288074             | 1062.562   | 2         |           |         |       |             | 1019.494812 | 35.41       | YADEEIPR            |             |                 |                 |                   |      |  |
| 1        | 1        | 1       |             |                        | 565.820028             | 1129.626   | 2         |           |         |       |             | 1062.562164 | 26.01       | SPFEVSVDK           |             |                 |                 |                   |      |  |
| 1        | 1        | 1       |             |                        | 565.820247             | 1129.626   | 2         |           |         |       |             | 1129.626816 | 48.65       | VNQPASFAIR          |             |                 |                 |                   |      |  |
| 1        | 1        | 1       |             |                        | 565.820247             | 1129.626   | 2         |           |         |       |             | 1129.626816 | 39.7        | VNQPASFAIR          |             |                 |                 |                   |      |  |
| 1        | 1        | 1       |             |                        | 574.788535             | 1147.563   | 2         |           |         |       |             | 1129.626816 | 49.34       | VNQPASFAIR          |             |                 |                 |                   |      |  |
| 1        | 1        | 1       |             |                        | 574.788662             | 1147.563   | 2         |           |         |       |             | 1147.564606 | 33.74       | IFAQDGEGQR          |             |                 |                 |                   |      |  |
| 1        | 1        | 1       |             |                        | 578.320374             | 1154.626   | 2         |           |         |       |             | 1147.564606 | 23.21       | IFAQDGEGQR          |             |                 |                 |                   |      |  |
| 1        | 1        | 1       |             |                        | 594.331053             | 1186.648   | 2         |           |         |       |             | 1154.624771 | 23.73       | TYSVEYLPK           |             |                 |                 |                   |      |  |
| 1        | 1        | 1       |             |                        | 616.309046             | 1230.604   | 2         |           |         |       |             | 1186.646942 | 27.15       | NTVELLVEDK          |             |                 |                 |                   |      |  |
| 1        | 1        | 1       |             |                        | 616.309046             | 1230.604   | 2         |           |         |       |             | 1230.605103 | 41.57       | VAVTEGCQPSR         |             |                 |                 |                   |      |  |
| 1        | 1        | 1       |             |                        | 616.309089             | 1230.604   | 2         |           |         |       |             | 1230.605103 | 45.91       | VAVTEGCQPSR         |             |                 |                 |                   |      |  |
| 1        | 1        | 1       |             |                        | 616.309197             | 1230.604   | 2         |           |         |       |             | 1230.605103 | 47.53       | VAVTEGCQPSR         |             |                 |                 |                   |      |  |
| 1        | 1        | 1       |             |                        | 619.835549             | 1237.657   | 2         |           |         |       |             | 1230.605103 | 29.51       | VAVTEGCQPSR         |             |                 |                 |                   |      |  |
| 1        | 1        | 1       |             |                        | 633.853122             | 1265.692   | 2         |           |         |       |             | 1237.657852 | 33.41       | VLQSFVDSK           |             |                 |                 |                   |      |  |
| 1        | 1        | 1       |             |                        | 639.833121             | 1277.652   | 2         |           |         |       |             | 1265.689163 | 29.25       | VLQSFVDSK           |             |                 |                 |                   |      |  |
| 1        | 1        | 1       |             |                        | 435.577257             | 1303.71    | 3         |           |         |       |             | 1277.652725 | 43.34       | TGEEVGFVDAK         |             |                 |                 |                   |      |  |
| 1        | 1        | 1       |             |                        | 435.57746              | 1303.711   | 3         |           |         |       |             | 1303.717331 | 41.37       | AWGPGLHGGIVGR       |             |                 |                 |                   |      |  |
| 1        | 1        | 1       |             |                        | 435.57746              | 1303.711   | 3         |           |         |       |             | 1303.717331 | 50.33       | AWGPGLHGGIVGR       |             |                 |                 |                   |      |  |
| 1        | 1        | 1       |             |                        | 663.388041             | 1324.762   | 2         |           |         |       |             | 1303.717331 | 42.5        | AWGPGLHGGIVGR       |             |                 |                 |                   |      |  |
| 1        | 1        | 1       |             |                        | 663.388041             | 1324.762   | 2         |           |         |       |             | 1324.756119 | 31.62       | VVPCLVTPVTGR        |             |                 |                 |                   |      |  |
| 1        | 1        | 1       |             |                        | 663.388041             | 1324.762   | 2         |           |         |       |             | 1324.756119 | 35.09       | VVPCLVTPVTGR        |             |                 |                 |                   |      |  |
| 1        | 1        | 1       |             |                        | 685.848128             | 1369.682   | 2         |           |         |       |             | 1324.756119 | 46.75       | VVPCLVTPVTGR        |             |                 |                 |                   |      |  |
| 1        | 1        | 1       |             |                        | 457.578774             | 1369.714   | 3         |           |         |       |             | 1369.678986 | 45.79       | DGTAVTYIPDK         |             |                 |                 |                   |      |  |
| 1        | 1        | 1       |             |                        | 457.578774             | 1369.714   | 3         |           |         |       |             | 1369.716675 | 39.66       | YGGELVPHFPAR        |             |                 |                 |                   |      |  |
| 1        | 1        | 1       |             |                        | 715.39137              | 1428.768   | 2         |           |         |       |             | 1369.716675 | 39.62       | YGGELVPHFPAR        |             |                 |                 |                   |      |  |
| 1        | 1        | 1       |             |                        | 715.39137              | 1428.768   | 2         |           |         |       |             | 1428.759689 | 60.25       | IGNLQTDLSGDLR       |             |                 |                 |                   |      |  |
| 1        | 1        | 1       |             |                        | 715.39137              | 1428.768   | 2         |           |         |       |             | 1428.759689 | 66.59       | IGNLQTDLSGDLR       |             |                 |                 |                   |      |  |
| 1        | 1        | 1       |             |                        | 721.402297             | 1440.79    | 2         |           |         |       |             | 1428.759689 | 73.61       | IGNLQTDLSGDLR       |             |                 |                 |                   |      |  |
| 1        | 1        | 1       |             |                        | 744.851908             | 1487.689   | 2         |           |         |       |             | 1440.784821 | 50.97       | AGPGTSLVTIEGPSK     |             |                 |                 |                   |      |  |
| 1        | 1        | 1       |             |                        | 744.851908             | 1487.689   | 2         |           |         |       |             | 1487.699066 | 48.32       | TFEMSDFIVDTR        |             |                 |                 |                   |      |  |
| 1        | 1        | 1       |             |                        | 744.851908             | 1487.689   | 2         |           |         |       |             | 1487.699066 | 51.99       | TFEMSDFIVDTR        |             |                 |                 |                   |      |  |
| 1        | 1        | 1       |             |                        | 502.626411             | 1504.857   | 3         |           |         |       |             | 1487.699066 | 46.12       | TFEMSDFIVDTR        |             |                 |                 |                   |      |  |
| 1        | 1        | 1       |             |                        | 502.626411             | 1504.857   | 3         |           |         |       |             | 1504.853851 | 27.84       | LPNNHIGISFIPR       |             |                 |                 |                   |      |  |
| 1        | 1        | 1       |             |                        | 529.613641             | 1585.819   | 3         |           |         |       |             | 1504.853851 | 29.18       | LPNNHIGISFIPR       |             |                 |                 |                   |      |  |
| 1        | 1        | 1       |             |                        | 825.884729             | 1649.755   | 2         |           |         |       |             | 1585.816467 | 33.9        | FADEHVPGPSFTVK      |             |                 |                 |                   |      |  |
| 1        | 1        | 1       |             |                        | 825.884729             | 1649.755   | 2         |           |         |       |             | 1649.747879 | 93.78       | VDIQTEDLEDGTCK      |             |                 |                 |                   |      |  |
| 1        | 1        | 1       |             |                        | 825.884729             | 1649.755   | 2         |           |         |       |             | 1649.747879 | 81.12       | VDIQTEDLEDGTCK      |             |                 |                 |                   |      |  |
| 1        | 1        | 1       |             |                        | 825.884729             | 1649.755   | 2         |           |         |       |             | 1649.747879 | 56.93       | VDIQTEDLEDGTCK      |             |                 |                 |                   |      |  |
| 1        | 1        | 1       |             |                        | 828.94694              | 1655.879   | 2         |           |         |       |             | 1649.828476 | 31.42       | VEVGKDQEFVTDTR      |             |                 |                 |                   |      |  |
| 1        | 1        | 1       |             |                        | 828.94694              | 1655.879   | 2         |           |         |       |             | 1655.875381 | 85.33       | GAGIGGLGITVEGPSEK   | 825.925     | 827.9375        | 3.76            | 1.66              | 2.27 |  |
| 1        | 1        | 1       |             |                        | 828.94694              | 1655.879   | 2         |           |         |       |             | 1655.875381 | 26.85       | GAGIGGLGITVEGPSEK   | 828.9469    | 830.9595        | 1.04            | 0.45              | 2.31 |  |
| 1        | 1        | 1       |             |                        | 839.898496             | 1677.782   | 2         |           |         |       |             | 1655.875381 | 85.53       | GAGIGGLGITVEGPSEK   |             |                 |                 |                   |      |  |
| 1        | 1        | 1       |             |                        | 851.430588             | 1700.847   | 2         |           |         |       |             | 1677.77919  | 45.2        | VDIQTEDLEDGTCK      |             |                 |                 |                   |      |  |
| 1        | 1        | 1       |             |                        | 851.430588             | 1700.847   | 2         |           |         |       |             | 1700.842712 | 46.45       | GAGTGGGLTVEGPCEAK   | 851.4306    | 853.4431        | 1.01            | 0.54              | 1.87 |  |
| 1        | 1        | 1       |             |                        | 851.430588             | 1700.847   | 2         |           |         |       |             | 1700.842712 | 93.94       | GAGTGGGLTVEGPCEAK   |             |                 |                 |                   |      |  |
| 1        | 1        | 1       |             |                        | 851.430588             | 1700.847   | 2         |           |         |       |             | 1700.842712 | 40.83       | GAGTGGGLTVEGPCEAK   |             |                 |                 |                   |      |  |
| 1        | 1        | 1       |             |                        | 966.960488             | 1931.906   | 2         |           |         |       |             | 1700.842712 | 93.82       | GAGTGGGLTVEGPCEAK   |             |                 |                 |                   |      |  |
| 1        | 1        | 1       |             |                        | 966.960488             | 1931.906   | 2         |           |         |       |             | 1931.900604 | 66.68       | SPFVVQVGEACNPACR    |             |                 |                 |                   |      |  |
| 1        | 1        | 1       |             |                        | 671.663503             | 2011.969   | 3         |           |         |       |             | 1931.900604 | 54.94       | SPFVVQVGEACNPACR    |             |                 |                 |                   |      |  |
| 1        | 1        | 1       |             |                        | 671.663503             | 2011.969   | 3         |           |         |       |             | 2011.965729 | 22.06       | IPEINSSDMSAHVTSPSGR |             |                 |                 |                   |      |  |
| 1        | 1        | 1       |             |                        | 671.663503             | 2011.969   | 3         |           |         |       |             | 2011.965729 | 30.17       | IPEINSSDMSAHVTSPSGR |             |                 |                 |                   |      |  |
| 1        | 1        | 1       |             |                        | 676.995797             | 2027.966   | 3         |           |         |       |             | 2011.965729 | 34.46       | IPEINSSDMSAHVTSPSGR |             |                 |                 |                   |      |  |
| 1        | 1        | 1       |             |                        | 477.290727             | 952.5669   | 2         | 3         | 2.15    | 0.24  |             | 2027.960648 | 21.86       | IPEINSSDMSAHVTSPSGR |             |                 |                 |                   |      |  |
| 1        | 1        | 1       | IPI00382696 |                        | Isoform 2 of Filamin-B | 477.290727 | 952.5669  | 2         |         |       |             | 952.572983  | 47.15       | AGLAPLEVR           |             |                 |                 |                   |      |  |
| 1        | 1        | 1       |             |                        |                        | 477.290785 | 952.567   | 2         |         |       |             |             | 952.572983  | 50.58               | AGLAPLEVR   |                 |                 |                   |      |  |
| 1        | 1        | 1       |             |                        |                        | 506.299693 | 1010.585  | 2         |         |       |             |             | 1010.589676 | 52.47               | IAGPGLGSGVR |                 |                 |                   |      |  |
| 1        | 1        | 1       |             |                        |                        | 510.750342 | 1019.486  | 2         |         |       |             |             | 1010.589676 | 69.88               | IAGPGLGSGVR |                 |                 |                   |      |  |
| 1        | 1        | 1       |             |                        |                        | 510.750649 | 1019.487  | 2         |         |       |             |             | 1019.494812 | 26.18               | YADEEIPR    |                 |                 |                   |      |  |
| 1        | 1        | 1       |             |                        |                        | 532.288074 | 1062.562  | 2         |         |       |             |             | 1019.494812 | 35.41               | YADEEIPR    |                 |                 |                   |      |  |

| Band num | prot_hit | nu_prot_acc | prot_desc | pep_exp_mz | pep_exp_n | pep_exp_z | quantific | average | stdev | pep_calc_mr | pep_score | pep_seq             | light m/z | heavy m/z | light intensity | heavy intensity | ratio light/heavy |
|----------|----------|-------------|-----------|------------|-----------|-----------|-----------|---------|-------|-------------|-----------|---------------------|-----------|-----------|-----------------|-----------------|-------------------|
| 1        | 1        |             |           | 510.750649 | 1019.487  | 2         |           |         |       | 1019.494812 | 35.41     | YADEEIPR            |           |           |                 |                 |                   |
| 1        | 1        |             |           | 532.288074 | 1062.562  | 2         |           |         |       | 1062.562164 | 26.01     | SPFEVSVDK           |           |           |                 |                 |                   |
| 1        | 1        |             |           | 565.820028 | 1129.626  | 2         |           |         |       | 1129.626816 | 48.65     | VNQPASFAIR          |           |           |                 |                 |                   |
| 1        | 1        |             |           | 565.820247 | 1129.626  | 2         |           |         |       | 1129.626816 | 39.7      | VNQPASFAIR          |           |           |                 |                 |                   |
| 1        | 1        |             |           | 565.820247 | 1129.626  | 2         |           |         |       | 1129.626816 | 49.34     | VNQPASFAIR          |           |           |                 |                 |                   |
| 1        | 1        |             |           | 574.788535 | 1147.563  | 2         |           |         |       | 1147.564606 | 33.74     | IFAQDGGGQR          |           |           |                 |                 |                   |
| 1        | 1        |             |           | 574.788662 | 1147.563  | 2         |           |         |       | 1147.564606 | 23.21     | IFAQDGGGQR          |           |           |                 |                 |                   |
| 1        | 1        |             |           | 578.320374 | 1154.626  | 2         |           |         |       | 1154.624771 | 23.73     | TYSVEYLPK           |           |           |                 |                 |                   |
| 1        | 1        |             |           | 594.331053 | 1186.648  | 2         |           |         |       | 1186.646942 | 27.15     | NTVELLVEDK          |           |           |                 |                 |                   |
| 1        | 1        |             |           | 616.309046 | 1230.604  | 2         |           |         |       | 1230.605103 | 41.57     | VAVTEGCQPSR         |           |           |                 |                 |                   |
| 1        | 1        |             |           | 616.309046 | 1230.604  | 2         |           |         |       | 1230.605103 | 45.91     | VAVTEGCQPSR         |           |           |                 |                 |                   |
| 1        | 1        |             |           | 616.309089 | 1230.604  | 2         |           |         |       | 1230.605103 | 47.53     | VAVTEGCQPSR         |           |           |                 |                 |                   |
| 1        | 1        |             |           | 616.309197 | 1230.604  | 2         |           |         |       | 1230.605103 | 29.51     | VAVTEGCQPSR         |           |           |                 |                 |                   |
| 1        | 1        |             |           | 619.835549 | 1237.657  | 2         |           |         |       | 1237.657852 | 33.41     | VLQSFTVDSSK         |           |           |                 |                 |                   |
| 1        | 1        |             |           | 633.853122 | 1265.692  | 2         |           |         |       | 1265.689163 | 29.25     | VLQSFTVDSSK         |           |           |                 |                 |                   |
| 1        | 1        |             |           | 639.833121 | 1277.652  | 2         |           |         |       | 1277.652725 | 43.34     | TGEEVGFVVDK         |           |           |                 |                 |                   |
| 1        | 1        |             |           | 435.577257 | 1303.71   | 3         |           |         |       | 1303.717331 | 41.37     | AWGPGHLGGIVGR       |           |           |                 |                 |                   |
| 1        | 1        |             |           | 435.57746  | 1303.711  | 3         |           |         |       | 1303.717331 | 50.33     | AWGPGHLGGIVGR       |           |           |                 |                 |                   |
| 1        | 1        |             |           | 435.57746  | 1303.711  | 3         |           |         |       | 1303.717331 | 42.5      | AWGPGHLGGIVGR       |           |           |                 |                 |                   |
| 1        | 1        |             |           | 663.388041 | 1324.762  | 2         |           |         |       | 1324.756119 | 31.62     | VVPCLVTPVTGR        |           |           |                 |                 |                   |
| 1        | 1        |             |           | 663.388041 | 1324.762  | 2         |           |         |       | 1324.756119 | 35.09     | VVPCLVTPVTGR        |           |           |                 |                 |                   |
| 1        | 1        |             |           | 663.388041 | 1324.762  | 2         |           |         |       | 1324.756119 | 46.75     | VVPCLVTPVTGR        |           |           |                 |                 |                   |
| 1        | 1        |             |           | 685.848128 | 1369.682  | 2         |           |         |       | 1369.678986 | 45.79     | DGTYAVTYIPDK        |           |           |                 |                 |                   |
| 1        | 1        |             |           | 457.578774 | 1369.714  | 3         |           |         |       | 1369.716675 | 39.66     | YGGELVPHFPAR        |           |           |                 |                 |                   |
| 1        | 1        |             |           | 457.578774 | 1369.714  | 3         |           |         |       | 1369.716675 | 39.62     | YGGELVPHFPAR        |           |           |                 |                 |                   |
| 1        | 1        |             |           | 715.39137  | 1428.768  | 2         |           |         |       | 1428.759689 | 60.25     | IGNLQTDLSGDLR       |           |           |                 |                 |                   |
| 1        | 1        |             |           | 715.39137  | 1428.768  | 2         |           |         |       | 1428.759689 | 66.59     | IGNLQTDLSGDLR       |           |           |                 |                 |                   |
| 1        | 1        |             |           | 715.39137  | 1428.768  | 2         |           |         |       | 1428.759689 | 73.61     | IGNLQTDLSGDLR       |           |           |                 |                 |                   |
| 1        | 1        |             |           | 721.402297 | 1440.79   | 2         |           |         |       | 1440.784821 | 50.97     | AGPGTSLVTIEGPSK     |           |           |                 |                 |                   |
| 1        | 1        |             |           | 744.851908 | 1487.689  | 2         |           |         |       | 1487.699066 | 48.32     | TFEMSDFIVDTR        |           |           |                 |                 |                   |
| 1        | 1        |             |           | 744.851908 | 1487.689  | 2         |           |         |       | 1487.699066 | 51.99     | TFEMSDFIVDTR        |           |           |                 |                 |                   |
| 1        | 1        |             |           | 744.851908 | 1487.689  | 2         |           |         |       | 1487.699066 | 46.12     | TFEMSDFIVDTR        |           |           |                 |                 |                   |
| 1        | 1        |             |           | 502.626411 | 1504.857  | 3         |           |         |       | 1504.853851 | 27.84     | LPNNHIGISFIPR       |           |           |                 |                 |                   |
| 1        | 1        |             |           | 502.626411 | 1504.857  | 3         |           |         |       | 1504.853851 | 29.18     | LPNNHIGISFIPR       |           |           |                 |                 |                   |
| 1        | 1        |             |           | 529.613641 | 1585.819  | 3         |           |         |       | 1585.816467 | 33.9      | FADEHVPSPFTVK       |           |           |                 |                 |                   |
| 1        | 1        |             |           | 825.884729 | 1649.755  | 2         |           |         |       | 1649.747879 | 93.78     | VDIQTEDLEDGTCK      |           |           |                 |                 |                   |
| 1        | 1        |             |           | 825.884729 | 1649.755  | 2         |           |         |       | 1649.747879 | 81.12     | VDIQTEDLEDGTCK      |           |           |                 |                 |                   |
| 1        | 1        |             |           | 825.884729 | 1649.755  | 2         |           |         |       | 1649.747879 | 56.93     | VDIQTEDLEDGTCK      |           |           |                 |                 |                   |
| 1        | 1        |             |           | 825.924968 | 1649.835  | 2         |           |         |       | 1649.828476 | 31.42     | VEVGKQEFVVDTR       |           |           |                 |                 |                   |
| 1        | 1        |             |           | 828.94694  | 1655.879  | 2         |           |         |       | 1655.875381 | 85.33     | GAGIGGLGITVEGPSEK   |           |           |                 |                 |                   |
| 1        | 1        |             |           | 828.94694  | 1655.879  | 2         |           |         |       | 1655.875381 | 85.53     | GAGIGGLGITVEGPSEK   |           |           |                 |                 |                   |
| 1        | 1        |             |           | 828.94694  | 1655.879  | 2         |           |         |       | 1655.875381 | 26.85     | GAGIGGLGITVEGPSEK   |           |           |                 |                 |                   |
| 1        | 1        |             |           | 839.898496 | 1677.782  | 2         |           |         |       | 1677.77919  | 45.2      | VDIQTEDLEDGTCK      |           |           |                 |                 |                   |
| 1        | 1        |             |           | 851.430588 | 1700.847  | 2         |           |         |       | 1700.842712 | 46.45     | GAGTGGGLTVEGPCEAK   |           |           |                 |                 |                   |
| 1        | 1        |             |           | 851.430588 | 1700.847  | 2         |           |         |       | 1700.842712 | 93.94     | GAGTGGGLTVEGPCEAK   |           |           |                 |                 |                   |
| 1        | 1        |             |           | 851.430588 | 1700.847  | 2         |           |         |       | 1700.842712 | 40.83     | GAGTGGGLTVEGPCEAK   |           |           |                 |                 |                   |
| 1        | 1        |             |           | 851.430588 | 1700.847  | 2         |           |         |       | 1700.842712 | 93.82     | GAGTGGGLTVEGPCEAK   |           |           |                 |                 |                   |
| 1        | 1        |             |           | 966.960488 | 1931.906  | 2         |           |         |       | 1931.900604 | 66.68     | SPFVVQVGEACPNACR    |           |           |                 |                 |                   |
| 1        | 1        |             |           | 966.960488 | 1931.906  | 2         |           |         |       | 1931.900604 | 54.94     | SPFVVQVGEACPNACR    |           |           |                 |                 |                   |
| 1        | 1        |             |           | 671.663503 | 2011.969  | 3         |           |         |       | 2011.965729 | 22.06     | IPEINSSDMSAHVTSPSGR |           |           |                 |                 |                   |
| 1        | 1        |             |           | 671.663503 | 2011.969  | 3         |           |         |       | 2011.965729 | 30.17     | IPEINSSDMSAHVTSPSGR |           |           |                 |                 |                   |
| 1        | 1        |             |           | 671.663503 | 2011.969  | 3         |           |         |       | 2011.965729 | 34.46     | IPEINSSDMSAHVTSPSGR |           |           |                 |                 |                   |
| 1        | 1        |             |           | 676.995797 | 2027.966  | 3         |           |         |       | 2027.960648 | 21.86     | IPEINSSDMSAHVTSPSGR |           |           |                 |                 |                   |
| 1        | 1        | IPI00477536 | Filamin B | 477.290727 | 952.5669  | 2         | 3         | 2.15    | 0.24  | 952.572983  | 47.15     | AGLAPLEVR           |           |           |                 |                 |                   |
| 1        | 1        |             |           | 477.290785 | 952.567   | 2         |           |         |       | 952.572983  | 50.58     | AGLAPLEVR           |           |           |                 |                 |                   |
| 1        | 1        |             |           | 506.299693 | 1010.585  | 2         |           |         |       | 1010.589676 | 52.47     | IAGPGLGSGVR         |           |           |                 |                 |                   |
| 1        | 1        |             |           | 506.30049  | 1010.586  | 2         |           |         |       | 1010.589676 | 69.88     | IAGPGLGSGVR         |           |           |                 |                 |                   |
| 1        | 1        |             |           | 510.750342 | 1019.486  | 2         |           |         |       | 1019.494812 | 26.18     | YADEEIPR            |           |           |                 |                 |                   |
| 1        | 1        |             |           | 510.750649 | 1019.487  | 2         |           |         |       | 1019.494812 | 35.41     | YADEEIPR            |           |           |                 |                 |                   |
| 1        | 1        |             |           | 532.288074 | 1062.562  | 2         |           |         |       | 1062.562164 | 26.01     | SPFEVSVDK           |           |           |                 |                 |                   |
| 1        | 1        |             |           | 565.820028 | 1129.626  | 2         |           |         |       | 1129.626816 | 48.65     | VNQPASFAIR          |           |           |                 |                 |                   |
| 1        | 1        |             |           | 565.820247 | 1129.626  | 2         |           |         |       | 1129.626816 | 39.7      | VNQPASFAIR          |           |           |                 |                 |                   |
| 1        | 1        |             |           | 565.820247 | 1129.626  | 2         |           |         |       | 1129.626816 | 49.34     | VNQPASFAIR          |           |           |                 |                 |                   |

| Band num | prot_hit | nu_prot_acc | prot_desc        | pep_exp_mz | pep_exp_n | pep_exp_z | quantific | average | stdev | pep_calc_mr | pep_score | pep_seq             | light m/z | heavy m/z | light intensity | heavy intensity | ratio light/heavy |
|----------|----------|-------------|------------------|------------|-----------|-----------|-----------|---------|-------|-------------|-----------|---------------------|-----------|-----------|-----------------|-----------------|-------------------|
| 1        | 1        |             |                  | 574.788535 | 1147.563  | 2         |           |         |       | 1147.564606 | 33.74     | IFAQDGEQQR          |           |           |                 |                 |                   |
| 1        | 1        |             |                  | 574.788662 | 1147.563  | 2         |           |         |       | 1147.564606 | 23.21     | IFAQDGEQQR          |           |           |                 |                 |                   |
| 1        | 1        |             |                  | 578.320374 | 1154.626  | 2         |           |         |       | 1154.624771 | 23.73     | TVSVEYLPK           |           |           |                 |                 |                   |
| 1        | 1        |             |                  | 594.331053 | 1186.648  | 2         |           |         |       | 1186.646942 | 27.15     | NTVELLVEDK          |           |           |                 |                 |                   |
| 1        | 1        |             |                  | 616.309046 | 1230.604  | 2         |           |         |       | 1230.605103 | 41.57     | VAVTEGCQPSR         |           |           |                 |                 |                   |
| 1        | 1        |             |                  | 616.309046 | 1230.604  | 2         |           |         |       | 1230.605103 | 45.91     | VAVTEGCQPSR         |           |           |                 |                 |                   |
| 1        | 1        |             |                  | 616.309089 | 1230.604  | 2         |           |         |       | 1230.605103 | 47.53     | VAVTEGCQPSR         |           |           |                 |                 |                   |
| 1        | 1        |             |                  | 616.309197 | 1230.604  | 2         |           |         |       | 1230.605103 | 29.51     | VAVTEGCQPSR         |           |           |                 |                 |                   |
| 1        | 1        |             |                  | 619.835549 | 1237.657  | 2         |           |         |       | 1237.657852 | 33.41     | VLQSFVDSK           |           |           |                 |                 |                   |
| 1        | 1        |             |                  | 633.853122 | 1265.692  | 2         |           |         |       | 1265.689163 | 29.25     | VLQSFVDSK           |           |           |                 |                 |                   |
| 1        | 1        |             |                  | 639.833121 | 1277.652  | 2         |           |         |       | 1277.652725 | 43.34     | TGEEVGFVDAK         |           |           |                 |                 |                   |
| 1        | 1        |             |                  | 435.577257 | 1303.71   | 3         |           |         |       | 1303.717331 | 41.37     | AWGPGLHGGIVGR       |           |           |                 |                 |                   |
| 1        | 1        |             |                  | 435.57746  | 1303.711  | 3         |           |         |       | 1303.717331 | 50.33     | AWGPGLHGGIVGR       |           |           |                 |                 |                   |
| 1        | 1        |             |                  | 435.57746  | 1303.711  | 3         |           |         |       | 1303.717331 | 42.5      | AWGPGLHGGIVGR       |           |           |                 |                 |                   |
| 1        | 1        |             |                  | 663.388041 | 1324.762  | 2         |           |         |       | 1324.756119 | 31.62     | VVPCLVTPVTGR        |           |           |                 |                 |                   |
| 1        | 1        |             |                  | 663.388041 | 1324.762  | 2         |           |         |       | 1324.756119 | 35.09     | VVPCLVTPVTGR        |           |           |                 |                 |                   |
| 1        | 1        |             |                  | 663.388041 | 1324.762  | 2         |           |         |       | 1324.756119 | 46.75     | VVPCLVTPVTGR        |           |           |                 |                 |                   |
| 1        | 1        |             |                  | 685.848128 | 1369.682  | 2         |           |         |       | 1369.678986 | 45.79     | DGTAVTYIPDK         |           |           |                 |                 |                   |
| 1        | 1        |             |                  | 457.578774 | 1369.714  | 3         |           |         |       | 1369.716675 | 39.66     | YGGELVPHFPAR        |           |           |                 |                 |                   |
| 1        | 1        |             |                  | 457.578774 | 1369.714  | 3         |           |         |       | 1369.716675 | 39.62     | YGGELVPHFPAR        |           |           |                 |                 |                   |
| 1        | 1        |             |                  | 715.39137  | 1428.768  | 2         |           |         |       | 1428.759689 | 60.25     | IGNLQTDLSDGLR       |           |           |                 |                 |                   |
| 1        | 1        |             |                  | 715.39137  | 1428.768  | 2         |           |         |       | 1428.759689 | 66.59     | IGNLQTDLSDGLR       |           |           |                 |                 |                   |
| 1        | 1        |             |                  | 715.39137  | 1428.768  | 2         |           |         |       | 1428.759689 | 73.61     | IGNLQTDLSDGLR       |           |           |                 |                 |                   |
| 1        | 1        |             |                  | 721.402297 | 1440.79   | 2         |           |         |       | 1440.784821 | 50.97     | AGPGLTSLVIEGPK      |           |           |                 |                 |                   |
| 1        | 1        |             |                  | 744.851908 | 1487.689  | 2         |           |         |       | 1487.699066 | 48.32     | TFEMSDFVDR          |           |           |                 |                 |                   |
| 1        | 1        |             |                  | 744.851908 | 1487.689  | 2         |           |         |       | 1487.699066 | 51.99     | TFEMSDFVDR          |           |           |                 |                 |                   |
| 1        | 1        |             |                  | 744.851908 | 1487.689  | 2         |           |         |       | 1487.699066 | 46.12     | TFEMSDFVDR          |           |           |                 |                 |                   |
| 1        | 1        |             |                  | 502.626411 | 1504.857  | 3         |           |         |       | 1504.853851 | 27.84     | LPNNHIGISFIPR       |           |           |                 |                 |                   |
| 1        | 1        |             |                  | 502.626411 | 1504.857  | 3         |           |         |       | 1504.853851 | 29.18     | LPNNHIGISFIPR       |           |           |                 |                 |                   |
| 1        | 1        |             |                  | 529.613641 | 1585.819  | 3         |           |         |       | 1585.816467 | 33.9      | FADEHVGPSPFTVK      |           |           |                 |                 |                   |
| 1        | 1        |             |                  | 825.884729 | 1649.755  | 2         |           |         |       | 1649.747879 | 93.78     | VDIQTEDLEDGCK       |           |           |                 |                 |                   |
| 1        | 1        |             |                  | 825.884729 | 1649.755  | 2         |           |         |       | 1649.747879 | 81.12     | VDIQTEDLEDGCK       |           |           |                 |                 |                   |
| 1        | 1        |             |                  | 825.884729 | 1649.755  | 2         |           |         |       | 1649.747879 | 56.93     | VDIQTEDLEDGCK       |           |           |                 |                 |                   |
| 1        | 1        |             |                  | 825.924968 | 1649.835  | 2         |           |         |       | 1649.828476 | 31.42     | VEVGDKQEFVDR        |           |           |                 |                 |                   |
| 1        | 1        |             |                  | 828.94694  | 1655.879  | 2         |           |         |       | 1655.875381 | 85.33     | GAGIGGLGITVEGPSEK   |           |           |                 |                 |                   |
| 1        | 1        |             |                  | 828.94694  | 1655.879  | 2         |           |         |       | 1655.875381 | 85.53     | GAGIGGLGITVEGPSEK   |           |           |                 |                 |                   |
| 1        | 1        |             |                  | 828.94694  | 1655.879  | 2         |           |         |       | 1655.875381 | 26.85     | GAGIGGLGITVEGPSEK   |           |           |                 |                 |                   |
| 1        | 1        |             |                  | 839.898496 | 1677.782  | 2         |           |         |       | 1677.77919  | 45.2      | VDIQTEDLEDGCK       |           |           |                 |                 |                   |
| 1        | 1        |             |                  | 851.430588 | 1700.847  | 2         |           |         |       | 1700.842712 | 46.45     | GAGTGGGLTVEGPCEAK   |           |           |                 |                 |                   |
| 1        | 1        |             |                  | 851.430588 | 1700.847  | 2         |           |         |       | 1700.842712 | 93.94     | GAGTGGGLTVEGPCEAK   |           |           |                 |                 |                   |
| 1        | 1        |             |                  | 851.430588 | 1700.847  | 2         |           |         |       | 1700.842712 | 40.83     | GAGTGGGLTVEGPCEAK   |           |           |                 |                 |                   |
| 1        | 1        |             |                  | 851.430588 | 1700.847  | 2         |           |         |       | 1700.842712 | 93.82     | GAGTGGGLTVEGPCEAK   |           |           |                 |                 |                   |
| 1        | 1        |             |                  | 966.960488 | 1931.906  | 2         |           |         |       | 1931.900604 | 66.68     | SPFVVQVGEACNPACR    |           |           |                 |                 |                   |
| 1        | 1        |             |                  | 966.960488 | 1931.906  | 2         |           |         |       | 1931.900604 | 54.94     | SPFVVQVGEACNPACR    |           |           |                 |                 |                   |
| 1        | 1        |             |                  | 671.663503 | 2011.969  | 3         |           |         |       | 2011.965729 | 22.06     | IPEINSSDMSAHVTSPSGR |           |           |                 |                 |                   |
| 1        | 1        |             |                  | 671.663503 | 2011.969  | 3         |           |         |       | 2011.965729 | 30.17     | IPEINSSDMSAHVTSPSGR |           |           |                 |                 |                   |
| 1        | 1        |             |                  | 671.663503 | 2011.969  | 3         |           |         |       | 2011.965729 | 34.46     | IPEINSSDMSAHVTSPSGR |           |           |                 |                 |                   |
| 1        | 1        |             |                  | 676.995797 | 2027.966  | 3         |           |         |       | 2027.960648 | 21.86     | IPEINSSDMSAHVTSPSGR |           |           |                 |                 |                   |
| 1        | 2        | IPI00302592 | Filamin A, alpha | 490.756302 | 979.4981  | 2         | 3         | 2.32    | 0.48  | 979.499893  | 29.3      | AFTVETR             |           |           |                 |                 |                   |
| 1        | 2        |             |                  | 497.74589  | 993.4772  | 2         |           |         |       | 993.479156  | 28.6      | AEISFEDR            |           |           |                 |                 |                   |
| 1        | 2        |             |                  | 564.30388  | 1126.593  | 2         |           |         |       | 1126.600662 | 43.78     | GTVEPQLR            |           |           |                 |                 |                   |
| 1        | 2        |             |                  | 564.30388  | 1126.593  | 2         |           |         |       | 1126.600662 | 46.52     | GTVEPQLR            |           |           |                 |                 |                   |
| 1        | 2        |             |                  | 670.864767 | 1339.715  | 2         |           |         |       | 1339.711975 | 40.75     | VEPGLGADNSVVR       |           |           |                 |                 |                   |
| 1        | 2        |             |                  | 670.864767 | 1339.715  | 2         |           |         |       | 1339.711975 | 42.9      | VEPGLGADNSVVR       |           |           |                 |                 |                   |
| 1        | 2        |             |                  | 670.864767 | 1339.715  | 2         |           |         |       | 1339.711975 | 41.53     | VEPGLGADNSVVR       |           |           |                 |                 |                   |
| 1        | 2        |             |                  | 722.397721 | 1442.781  | 2         |           |         |       | 1442.775345 | 65.83     | IANLQTDLSDGLR       | 722.3977  | 724.4103  | 2.98            | 1.05            | 2.84              |
| 1        | 2        |             |                  | 722.397721 | 1442.781  | 2         |           |         |       | 1442.775345 | 69.68     | IANLQTDLSDGLR       |           |           |                 |                 |                   |
| 1        | 2        |             |                  | 722.397721 | 1442.781  | 2         |           |         |       | 1442.775345 | 52.53     | IANLQTDLSDGLR       |           |           |                 |                 |                   |
| 1        | 2        |             |                  | 544.929698 | 1631.767  | 3         |           |         |       | 1631.763779 | 28.67     | YAPSEAGLHMDIR       |           |           |                 |                 |                   |
| 1        | 2        |             |                  | 840.955513 | 1679.896  | 2         |           |         |       | 1679.886642 | 28.69     | VTAQGPGLPSGNIANK    |           |           |                 |                 |                   |
| 1        | 2        |             |                  | 896.451274 | 1790.888  | 2         |           |         |       | 1790.882309 | 79        | VANPSGNLTETYVQDR    | 896.4514  | 898.464   | 2.57            | 1.15            | 2.23              |
| 1        | 2        |             |                  | 896.451412 | 1790.888  | 2         |           |         |       | 1790.882309 | 81.32     | VANPSGNLTETYVQDR    |           |           |                 |                 |                   |
| 1        | 2        |             |                  | 896.451412 | 1790.888  | 2         |           |         |       | 1790.882309 | 88.78     | VANPSGNLTETYVQDR    |           |           |                 |                 |                   |

| Band num | prot_hit_nu | prot_acc    | prot_desc        | pep_exp_mz | pep_exp_n | pep_exp_z | quantific | average | stdev | pep_calc_mr | pep_score | pep_seq            | light m/z | heavy m/z | light intensity | heavy intensity | ratio light/heavy |  |
|----------|-------------|-------------|------------------|------------|-----------|-----------|-----------|---------|-------|-------------|-----------|--------------------|-----------|-----------|-----------------|-----------------|-------------------|--|
| 1        | 2           |             |                  | 906.964532 | 1811.915  | 2         |           |         |       | 1811.911148 | 46.76     | VQVQDNEGCPVEALVK   |           |           |                 |                 |                   |  |
| 1        | 2           |             |                  | 920.980946 | 1839.947  | 2         |           |         |       | 1839.942459 | 31.33     | VQVQDNEGCPVEALVK   |           |           |                 |                 |                   |  |
| 1        | 2           |             |                  | 920.980946 | 1839.947  | 2         |           |         |       | 1839.942459 | 53.16     | VQVQDNEGCPVEALVK   |           |           |                 |                 |                   |  |
| 1        | 2           |             |                  | 948.443722 | 1894.873  | 2         |           |         |       | 1894.869003 | 61.69     | SPYTVTIVGQACNPSACR | 948.4437  | 950.4563  | 0.83            | 0.44            | 1.89              |  |
| 1        | 2           |             |                  | 948.443722 | 1894.873  | 2         |           |         |       | 1894.869003 | 64.43     | SPYTVTIVGQACNPSACR |           |           |                 |                 |                   |  |
| 1        | 2           |             |                  | 948.443722 | 1894.873  | 2         |           |         |       | 1894.869003 | 93.81     | SPYTVTIVGQACNPSACR |           |           |                 |                 |                   |  |
| 1        | 2           | IPI00333541 | Filamin-A        | 490.756302 | 979.4981  | 2         |           |         |       | 979.499893  | 29.3      | AFTVETR            |           |           |                 |                 |                   |  |
| 1        | 2           |             |                  | 497.74589  | 993.4772  | 2         |           |         |       | 993.479156  | 28.6      | AEISFEDR           |           |           |                 |                 |                   |  |
| 1        | 2           |             |                  | 564.30388  | 1126.593  | 2         |           |         |       | 1126.600662 | 43.78     | GTVEPQLEAR         |           |           |                 |                 |                   |  |
| 1        | 2           |             |                  | 564.30388  | 1126.593  | 2         |           |         |       | 1126.600662 | 46.52     | GTVEPQLEAR         |           |           |                 |                 |                   |  |
| 1        | 2           |             |                  | 670.864767 | 1339.715  | 2         |           |         |       | 1339.711975 | 40.75     | VEPGLGADNSVVR      |           |           |                 |                 |                   |  |
| 1        | 2           |             |                  | 670.864767 | 1339.715  | 2         |           |         |       | 1339.711975 | 42.9      | VEPGLGADNSVVR      |           |           |                 |                 |                   |  |
| 1        | 2           |             |                  | 670.864767 | 1339.715  | 2         |           |         |       | 1339.711975 | 41.53     | VEPGLGADNSVVR      |           |           |                 |                 |                   |  |
| 1        | 2           |             |                  | 722.397721 | 1442.781  | 2         |           |         |       | 1442.775345 | 65.83     | IANLQTDLSDGRL      |           |           |                 |                 |                   |  |
| 1        | 2           |             |                  | 722.397721 | 1442.781  | 2         |           |         |       | 1442.775345 | 69.68     | IANLQTDLSDGRL      |           |           |                 |                 |                   |  |
| 1        | 2           |             |                  | 722.397721 | 1442.781  | 2         |           |         |       | 1442.775345 | 52.53     | IANLQTDLSDGRL      |           |           |                 |                 |                   |  |
| 1        | 2           |             |                  | 544.929698 | 1631.767  | 3         |           |         |       | 1631.763779 | 28.67     | YAPSEAGLHEMIDR     |           |           |                 |                 |                   |  |
| 1        | 2           |             |                  | 840.955513 | 1679.896  | 2         |           |         |       | 1679.886642 | 28.69     | VTAQGPGLPSGNIANK   |           |           |                 |                 |                   |  |
| 1        | 2           |             |                  | 896.451274 | 1790.888  | 2         |           |         |       | 1790.882309 | 79        | VANPSGNLTETYVQDR   |           |           |                 |                 |                   |  |
| 1        | 2           |             |                  | 896.451412 | 1790.888  | 2         |           |         |       | 1790.882309 | 81.32     | VANPSGNLTETYVQDR   |           |           |                 |                 |                   |  |
| 1        | 2           |             |                  | 896.451412 | 1790.888  | 2         |           |         |       | 1790.882309 | 88.78     | VANPSGNLTETYVQDR   |           |           |                 |                 |                   |  |
| 1        | 2           |             |                  | 906.964532 | 1811.915  | 2         |           |         |       | 1811.911148 | 46.76     | VQVQDNEGCPVEALVK   |           |           |                 |                 |                   |  |
| 1        | 2           |             |                  | 920.980946 | 1839.947  | 2         |           |         |       | 1839.942459 | 31.33     | VQVQDNEGCPVEALVK   |           |           |                 |                 |                   |  |
| 1        | 2           |             |                  | 920.980946 | 1839.947  | 2         |           |         |       | 1839.942459 | 53.16     | VQVQDNEGCPVEALVK   |           |           |                 |                 |                   |  |
| 1        | 2           |             |                  | 948.443722 | 1894.873  | 2         |           |         |       | 1894.869003 | 61.69     | SPYTVTIVGQACNPSACR |           |           |                 |                 |                   |  |
| 1        | 2           |             |                  | 948.443722 | 1894.873  | 2         |           |         |       | 1894.869003 | 64.43     | SPYTVTIVGQACNPSACR |           |           |                 |                 |                   |  |
| 1        | 2           |             |                  | 948.443722 | 1894.873  | 2         |           |         |       | 1894.869003 | 93.81     | SPYTVTIVGQACNPSACR |           |           |                 |                 |                   |  |
| 1        | 2           | IPI00644576 | Filamin A, alpha | 490.756302 | 979.4981  | 2         |           |         |       | 979.499893  | 29.3      | AFTVETR            |           |           |                 |                 |                   |  |
| 1        | 2           |             |                  | 497.74589  | 993.4772  | 2         |           |         |       | 993.479156  | 28.6      | AEISFEDR           |           |           |                 |                 |                   |  |
| 1        | 2           |             |                  | 564.30388  | 1126.593  | 2         |           |         |       | 1126.600662 | 43.78     | GTVEPQLEAR         |           |           |                 |                 |                   |  |
| 1        | 2           |             |                  | 564.30388  | 1126.593  | 2         |           |         |       | 1126.600662 | 46.52     | GTVEPQLEAR         |           |           |                 |                 |                   |  |
| 1        | 2           |             |                  | 670.864767 | 1339.715  | 2         |           |         |       | 1339.711975 | 40.75     | VEPGLGADNSVVR      |           |           |                 |                 |                   |  |
| 1        | 2           |             |                  | 670.864767 | 1339.715  | 2         |           |         |       | 1339.711975 | 42.9      | VEPGLGADNSVVR      |           |           |                 |                 |                   |  |
| 1        | 2           |             |                  | 670.864767 | 1339.715  | 2         |           |         |       | 1339.711975 | 41.53     | VEPGLGADNSVVR      |           |           |                 |                 |                   |  |
| 1        | 2           |             |                  | 722.397721 | 1442.781  | 2         |           |         |       | 1442.775345 | 65.83     | IANLQTDLSDGRL      |           |           |                 |                 |                   |  |
| 1        | 2           |             |                  | 722.397721 | 1442.781  | 2         |           |         |       | 1442.775345 | 69.68     | IANLQTDLSDGRL      |           |           |                 |                 |                   |  |
| 1        | 2           |             |                  | 722.397721 | 1442.781  | 2         |           |         |       | 1442.775345 | 52.53     | IANLQTDLSDGRL      |           |           |                 |                 |                   |  |
| 1        | 2           |             |                  | 544.929698 | 1631.767  | 3         |           |         |       | 1631.763779 | 28.67     | YAPSEAGLHEMIDR     |           |           |                 |                 |                   |  |
| 1        | 2           |             |                  | 840.955513 | 1679.896  | 2         |           |         |       | 1679.886642 | 28.69     | VTAQGPGLPSGNIANK   |           |           |                 |                 |                   |  |
| 1        | 2           |             |                  | 896.451274 | 1790.888  | 2         |           |         |       | 1790.882309 | 79        | VANPSGNLTETYVQDR   |           |           |                 |                 |                   |  |
| 1        | 2           |             |                  | 896.451412 | 1790.888  | 2         |           |         |       | 1790.882309 | 81.32     | VANPSGNLTETYVQDR   |           |           |                 |                 |                   |  |
| 1        | 2           |             |                  | 896.451412 | 1790.888  | 2         |           |         |       | 1790.882309 | 88.78     | VANPSGNLTETYVQDR   |           |           |                 |                 |                   |  |
| 1        | 2           |             |                  | 906.964532 | 1811.915  | 2         |           |         |       | 1811.911148 | 46.76     | VQVQDNEGCPVEALVK   |           |           |                 |                 |                   |  |
| 1        | 2           |             |                  | 920.980946 | 1839.947  | 2         |           |         |       | 1839.942459 | 31.33     | VQVQDNEGCPVEALVK   |           |           |                 |                 |                   |  |
| 1        | 2           |             |                  | 920.980946 | 1839.947  | 2         |           |         |       | 1839.942459 | 53.16     | VQVQDNEGCPVEALVK   |           |           |                 |                 |                   |  |
| 1        | 2           |             |                  | 948.443722 | 1894.873  | 2         |           |         |       | 1894.869003 | 61.69     | SPYTVTIVGQACNPSACR |           |           |                 |                 |                   |  |
| 1        | 2           |             |                  | 948.443722 | 1894.873  | 2         |           |         |       | 1894.869003 | 64.43     | SPYTVTIVGQACNPSACR |           |           |                 |                 |                   |  |
| 1        | 2           |             |                  | 948.443722 | 1894.873  | 2         |           |         |       | 1894.869003 | 93.81     | SPYTVTIVGQACNPSACR |           |           |                 |                 |                   |  |
| 1        | 3           | IPI00019502 | Myosin-9         | 476.766544 | 951.5185  | 2         | 3         | 5.21    | 1.44  | 951.520218  | 20.25     | VVFQEFR            |           |           |                 |                 |                   |  |
| 1        | 3           |             |                  | 611.327496 | 1220.64   | 2         |           |         |       | 1220.642532 | 34.51     | ALELDSNLYR         | 611.3276  | 613.3402  | 9               | 1.36            | 6.62              |  |
| 1        | 3           |             |                  | 611.327496 | 1220.64   | 2         |           |         |       | 1220.642532 | 36.36     | ALELDSNLYR         |           |           |                 |                 |                   |  |
| 1        | 3           |             |                  | 611.32762  | 1220.641  | 2         |           |         |       | 1220.642532 | 51.48     | ALELDSNLYR         |           |           |                 |                 |                   |  |
| 1        | 3           |             |                  | 616.818119 | 1231.622  | 2         |           |         |       | 1231.614258 | 26.24     | ALEQQVEEMK         |           |           |                 |                 |                   |  |
| 1        | 3           |             |                  | 626.33903  | 1250.664  | 2         |           |         |       | 1250.664307 | 45.36     | AGVLAHLEEER        |           |           |                 |                 |                   |  |
| 1        | 3           |             |                  | 626.339536 | 1250.665  | 2         |           |         |       | 1250.664307 | 50.73     | AGVLAHLEEER        |           |           |                 |                 |                   |  |
| 1        | 3           |             |                  | 841.415103 | 1680.816  | 2         |           |         |       | 1680.811829 | 87.77     | IAEFTTNLTETEEEK    | 841.4151  | 843.4277  | 19              | 3.61            | 5.26              |  |
| 1        | 3           |             |                  | 841.415103 | 1680.816  | 2         |           |         |       | 1680.811829 | 71.05     | IAEFTTNLTETEEEK    |           |           |                 |                 |                   |  |
| 1        | 3           |             |                  | 855.431774 | 1708.849  | 2         |           |         |       | 1708.84314  | 84.55     | IAEFTTNLTETEEEK    |           |           |                 |                 |                   |  |
| 1        | 3           |             |                  | 855.431774 | 1708.849  | 2         |           |         |       | 1708.84314  | 34.77     | IAEFTTNLTETEEEK    |           |           |                 |                 |                   |  |
| 1        | 3           |             |                  | 987.527539 | 1973.041  | 2         |           |         |       | 1973.034119 | 78.77     | LQVELDNVTGLLSQSDSK |           |           |                 |                 |                   |  |
| 1        | 3           |             |                  | 987.527539 | 1973.041  | 2         |           |         |       | 1973.034119 | 53.16     | LQVELDNVTGLLSQSDSK |           |           |                 |                 |                   |  |
| 1        | 3           |             |                  | 660.014927 | 1977.023  | 3         |           |         |       | 1977.019165 | 53.28     | LQQLDLDLVDLDHQR    | 660.015   | 661.3567  | 2.69            | 0.72            | 3.74              |  |
| 1        | 3           |             |                  | 660.014991 | 1977.023  | 3         |           |         |       | 1977.019165 | 54.52     | LQQLDLDLVDLDHQR    |           |           |                 |                 |                   |  |

| Band num | prot_hit | nu_prot_acc | prot_desc                    | pep_exp_mz | pep_exp_n | pep_exp_z | quantific | average | stdev | pep_calc_mr | pep_score | pep_seq         | light m/z | heavy m/z | light intensity | heavy intensity | ratio light/heavy |
|----------|----------|-------------|------------------------------|------------|-----------|-----------|-----------|---------|-------|-------------|-----------|-----------------|-----------|-----------|-----------------|-----------------|-------------------|
| 1        | 3        |             |                              | 660.014991 | 1977.023  | 3         |           |         |       | 1977.019165 | 70.24     | LQQLDLDLVDLDHQR |           |           |                 |                 |                   |
| 1        | 3        |             |                              | 660.015506 | 1977.025  | 3         |           |         |       | 1977.019165 | 47.04     | LQQLDLDLVDLDHQR |           |           |                 |                 |                   |
| 1        | 3        |             |                              | 660.015506 | 1977.025  | 3         |           |         |       | 1977.019165 | 55.16     | LQQLDLDLVDLDHQR |           |           |                 |                 |                   |
| 1        | 3        |             |                              | 989.522332 | 1977.03   | 2         |           |         |       | 1977.019165 | 28.84     | LQQLDLDLVDLDHQR |           |           |                 |                 |                   |
| 1        | 3        |             |                              | 989.522332 | 1977.03   | 2         |           |         |       | 1977.019165 | 41.83     | LQQLDLDLVDLDHQR |           |           |                 |                 |                   |
| 1        | 3        |             |                              | 989.522332 | 1977.03   | 2         |           |         |       | 1977.019165 | 30.1      | LQQLDLDLVDLDHQR |           |           |                 |                 |                   |
| 1        | 4        | IPI00021812 | Neuroblast differentiation-a | 421.218108 | 840.4217  | 2         | 3         | 2.66    | 0.46  | 840.422821  | 22.34     | FSMPGFK         |           |           |                 |                 |                   |
| 1        | 4        |             |                              | 465.250396 | 928.4862  | 2         |           |         |       | 928.488998  | 24.66     | ADIDVSGPK       |           |           |                 |                 |                   |
| 1        | 4        |             |                              | 471.274856 | 940.5352  | 2         |           |         |       | 940.536606  | 51.26     | GGVDVTLPR       | 471.2749  | 473.2874  | 1.18            | 0.37            | 3.19              |
| 1        | 4        |             |                              | 472.257027 | 942.4995  | 2         |           |         |       | 942.504654  | 24.79     | ADVDVSGPK       |           |           |                 |                 |                   |
| 1        | 4        |             |                              | 479.265006 | 956.5155  | 2         |           |         |       | 956.520309  | 31.64     | ADIDVSGPK       |           |           |                 |                 |                   |
| 1        | 4        |             |                              | 479.265192 | 956.5158  | 2         |           |         |       | 956.520309  | 45.49     | ADVDISGPK       |           |           |                 |                 |                   |
| 1        | 4        |             |                              | 591.848109 | 1181.682  | 2         |           |         |       | 1181.679245 | 33.9      | LNVGAPDVTLR     |           |           |                 |                 |                   |
| 1        | 4        |             |                              | 591.848325 | 1181.682  | 2         |           |         |       | 1181.679245 | 21.91     | LNVGAPDVTLR     |           |           |                 |                 |                   |
| 1        | 4        |             |                              | 591.848325 | 1181.682  | 2         |           |         |       | 1181.679245 | 31.61     | LNVGAPDVTLR     |           |           |                 |                 |                   |
| 1        | 4        |             |                              | 634.331137 | 1266.648  | 2         |           |         |       | 1266.647995 | 56.41     | GEGPDVDVNLPK    | 634.333   | 636.3455  | 1.54            | 0.63            | 2.44              |
| 1        | 4        |             |                              | 634.332973 | 1266.651  | 2         |           |         |       | 1266.647995 | 77.07     | GEGPDVDVNLPK    |           |           |                 |                 |                   |
| 1        | 4        |             |                              | 641.340304 | 1280.666  | 2         |           |         |       | 1280.663635 | 50.83     | GEGPEVDVNLPK    | 641.3403  | 643.3529  | 1.83            | 0.78            | 2.35              |
| 1        | 4        |             |                              | 641.340304 | 1280.666  | 2         |           |         |       | 1280.663635 | 76.79     | GEGPEVDVNLPK    |           |           |                 |                 |                   |
| 1        | 4        |             |                              | 641.340304 | 1280.666  | 2         |           |         |       | 1280.663635 | 68.11     | GEGPEVDVNLPK    |           |           |                 |                 |                   |
| 1        | 4        |             |                              | 642.372082 | 1282.73   | 2         |           |         |       | 1282.740875 | 22.68     | ISIPVDLDLK      |           |           |                 |                 |                   |
| 1        | 4        |             |                              | 642.372082 | 1282.73   | 2         |           |         |       | 1282.740875 | 23.74     | ISIPVDLDLK      |           |           |                 |                 |                   |
| 1        | 4        |             |                              | 648.345828 | 1294.677  | 2         |           |         |       | 1294.679306 | 70.53     | GEGPDVDVNLPK    |           |           |                 |                 |                   |
| 1        | 4        |             |                              | 651.855334 | 1301.696  | 2         |           |         |       | 1301.692535 | 33.77     | ISMPDIDLNLK     |           |           |                 |                 |                   |
| 1        | 4        |             |                              | 651.855334 | 1301.696  | 2         |           |         |       | 1301.692535 | 30.69     | ISMPDIDLNLK     |           |           |                 |                 |                   |
| 1        | 4        |             |                              | 655.354936 | 1308.695  | 2         |           |         |       | 1308.694946 | 71.08     | GEGPEVDVNLPK    |           |           |                 |                 |                   |
| 1        | 4        |             |                              | 655.354936 | 1308.695  | 2         |           |         |       | 1308.694946 | 71.46     | GEGPEVDVNLPK    |           |           |                 |                 |                   |
| 1        | 4        |             |                              | 655.355191 | 1308.696  | 2         |           |         |       | 1308.694946 | 62.24     | GEGPEVDVNLPK    |           |           |                 |                 |                   |
| 1        | 4        |             |                              | 662.361912 | 1322.709  | 2         |           |         |       | 1322.710602 | 34.84     | AEGPEVDVNLPK    |           |           |                 |                 |                   |
| 1        | 4        |             |                              | 662.361912 | 1322.709  | 2         |           |         |       | 1322.710602 | 40.92     | AEGPEVDVNLPK    |           |           |                 |                 |                   |
| 1        | 4        |             |                              | 662.362674 | 1322.711  | 2         |           |         |       | 1322.710602 | 61.44     | AEGPEVDVNLPK    |           |           |                 |                 |                   |
| 1        | 4        | IPI00555610 | 313 kDa protein              | 421.218108 | 840.4217  | 2         | 3         | 2.66    | 0.46  | 840.422821  | 22.34     | FSMPGFK         |           |           |                 |                 |                   |
| 1        | 4        |             |                              | 465.250396 | 928.4862  | 2         |           |         |       | 928.488998  | 24.66     | ADIDVSGPK       |           |           |                 |                 |                   |
| 1        | 4        |             |                              | 471.274856 | 940.5352  | 2         |           |         |       | 940.536606  | 51.26     | GGVDVTLPR       |           |           |                 |                 |                   |
| 1        | 4        |             |                              | 472.257027 | 942.4995  | 2         |           |         |       | 942.504654  | 24.79     | ADVDVSGPK       |           |           |                 |                 |                   |
| 1        | 4        |             |                              | 479.265006 | 956.5155  | 2         |           |         |       | 956.520309  | 31.64     | ADIDVSGPK       |           |           |                 |                 |                   |
| 1        | 4        |             |                              | 479.265192 | 956.5158  | 2         |           |         |       | 956.520309  | 45.49     | ADVDISGPK       |           |           |                 |                 |                   |
| 1        | 4        |             |                              | 591.848109 | 1181.682  | 2         |           |         |       | 1181.679245 | 33.9      | LNVGAPDVTLR     |           |           |                 |                 |                   |
| 1        | 4        |             |                              | 591.848325 | 1181.682  | 2         |           |         |       | 1181.679245 | 21.91     | LNVGAPDVTLR     |           |           |                 |                 |                   |
| 1        | 4        |             |                              | 591.848325 | 1181.682  | 2         |           |         |       | 1181.679245 | 31.61     | LNVGAPDVTLR     |           |           |                 |                 |                   |
| 1        | 4        |             |                              | 634.331137 | 1266.648  | 2         |           |         |       | 1266.647995 | 56.41     | GEGPDVDVNLPK    |           |           |                 |                 |                   |
| 1        | 4        |             |                              | 634.332973 | 1266.651  | 2         |           |         |       | 1266.647995 | 77.07     | GEGPDVDVNLPK    |           |           |                 |                 |                   |
| 1        | 4        |             |                              | 641.340304 | 1280.666  | 2         |           |         |       | 1280.663635 | 50.83     | GEGPEVDVNLPK    |           |           |                 |                 |                   |
| 1        | 4        |             |                              | 641.340304 | 1280.666  | 2         |           |         |       | 1280.663635 | 76.79     | GEGPEVDVNLPK    |           |           |                 |                 |                   |
| 1        | 4        |             |                              | 641.340304 | 1280.666  | 2         |           |         |       | 1280.663635 | 68.11     | GEGPEVDVNLPK    |           |           |                 |                 |                   |
| 1        | 4        |             |                              | 642.372082 | 1282.73   | 2         |           |         |       | 1282.740875 | 22.68     | ISIPVDLDLK      |           |           |                 |                 |                   |
| 1        | 4        |             |                              | 642.372082 | 1282.73   | 2         |           |         |       | 1282.740875 | 23.74     | ISIPVDLDLK      |           |           |                 |                 |                   |
| 1        | 4        |             |                              | 648.345828 | 1294.677  | 2         |           |         |       | 1294.679306 | 70.53     | GEGPDVDVNLPK    |           |           |                 |                 |                   |
| 1        | 4        |             |                              | 651.855334 | 1301.696  | 2         |           |         |       | 1301.692535 | 33.77     | ISMPDIDLNLK     |           |           |                 |                 |                   |
| 1        | 4        |             |                              | 651.855334 | 1301.696  | 2         |           |         |       | 1301.692535 | 30.69     | ISMPDIDLNLK     |           |           |                 |                 |                   |
| 1        | 4        |             |                              | 655.354936 | 1308.695  | 2         |           |         |       | 1308.694946 | 71.08     | GEGPEVDVNLPK    |           |           |                 |                 |                   |
| 1        | 4        |             |                              | 655.354936 | 1308.695  | 2         |           |         |       | 1308.694946 | 71.46     | GEGPEVDVNLPK    |           |           |                 |                 |                   |
| 1        | 4        |             |                              | 655.355191 | 1308.696  | 2         |           |         |       | 1308.694946 | 62.24     | GEGPEVDVNLPK    |           |           |                 |                 |                   |
| 1        | 4        |             |                              | 662.361912 | 1322.709  | 2         |           |         |       | 1322.710602 | 34.84     | AEGPEVDVNLPK    |           |           |                 |                 |                   |
| 1        | 4        |             |                              | 662.361912 | 1322.709  | 2         |           |         |       | 1322.710602 | 40.92     | AEGPEVDVNLPK    |           |           |                 |                 |                   |
| 1        | 4        |             |                              | 662.362674 | 1322.711  | 2         |           |         |       | 1322.710602 | 61.44     | AEGPEVDVNLPK    |           |           |                 |                 |                   |
| 1        | 5        | IPI00026781 | Fatty acid synthase          | 475.259163 | 948.5038  | 2         | 4         | 2.66    | 0.70  | 948.50528   | 33.75     | GYAVLGGER       |           |           |                 |                 |                   |
| 1        | 5        |             |                              | 495.285514 | 988.5565  | 2         |           |         |       | 988.557739  | 39.52     | TGTVSLEVR       | 495.2855  | 497.2981  | 13              | 6.07            | 2.14              |
| 1        | 5        |             |                              | 536.313008 | 1070.611  | 2         |           |         |       | 1070.610825 | 43.74     | AQVADVVSRR      | 536.313   | 538.3256  | 17              | 5.1             | 3.33              |
| 1        | 5        |             |                              | 425.897946 | 1274.672  | 3         |           |         |       | 1274.675552 | 23.88     | VSVHIEGDHR      |           |           |                 |                 |                   |
| 1        | 5        |             |                              | 319.676397 | 1274.676  | 4         |           |         |       | 1274.675552 | 24.9      | VSVHIEGDHR      |           |           |                 |                 |                   |
| 1        | 5        |             |                              | 646.39179  | 1290.769  | 2         |           |         |       | 1290.768402 | 48.68     | LQVDDQLPVR      | 646.3918  | 648.4044  | 29.9            | 9.35            | 3.20              |
| 1        | 5        |             |                              | 665.858609 | 1329.703  | 2         |           |         |       | 1329.698669 | 31.66     | AALQEELQLCK     |           |           |                 |                 |                   |

| Band num | prot_hit | nu_prot_acc | prot_desc                    | pep_exp_mz | pep_exp_n | pep_exp_z | quantific | average | stdev | pep_calc_mr | pep_score | pep_seq           | light m/z | heavy m/z | light intensity | heavy intensity | ratio light/heavy |
|----------|----------|-------------|------------------------------|------------|-----------|-----------|-----------|---------|-------|-------------|-----------|-------------------|-----------|-----------|-----------------|-----------------|-------------------|
| 1        | 5        |             |                              | 453.58996  | 1357.748  | 3         |           |         |       | 1357.749084 | 34.11     | VTAIHDPATHR       |           |           |                 |                 |                   |
| 1        | 5        |             |                              | 340.444759 | 1357.75   | 4         |           |         |       | 1357.749084 | 27.72     | VTAIHDPATHR       |           |           |                 |                 |                   |
| 1        | 5        |             |                              | 391.972527 | 1563.861  | 4         |           |         |       | 1563.854553 | 43.52     | VVEVLAGHGHLYSR    |           |           |                 |                 |                   |
| 1        | 5        |             |                              | 821.43429  | 1640.854  | 2         |           |         |       | 1640.850632 | 80.7      | EDGLAQQQTQLNLR    | 821.4329  | 823.4469  | 9.91            | 4.99            | 1.99              |
| 1        | 5        |             |                              | 821.43429  | 1640.854  | 2         |           |         |       | 1640.850632 | 85.02     | EDGLAQQQTQLNLR    |           |           |                 |                 |                   |
| 1        | 5        |             |                              | 821.43429  | 1640.854  | 2         |           |         |       | 1640.850632 | 41.75     | EDGLAQQQTQLNLR    |           |           |                 |                 |                   |
| 1        | 5        |             |                              | 832.900503 | 1663.786  | 2         |           |         |       | 1663.78009  | 29.85     | CTVFHGAQVEDAFR    |           |           |                 |                 |                   |
| 1        | 5        | IPI00645907 | fatty acid synthase          | 475.259163 | 948.5038  | 2         | 4         | 2.66    | 0.70  | 948.50528   | 33.75     | GYAVLGGER         |           |           |                 |                 |                   |
| 1        | 5        |             |                              | 495.285514 | 988.5565  | 2         |           |         |       | 988.557739  | 39.52     | TGTVSLEVR         |           |           |                 |                 |                   |
| 1        | 5        |             |                              | 536.313008 | 1070.611  | 2         |           |         |       | 1070.610825 | 43.74     | AQVADVVSRS        |           |           |                 |                 |                   |
| 1        | 5        |             |                              | 425.897946 | 1274.672  | 3         |           |         |       | 1274.675552 | 23.88     | VSVHVIEGDHR       |           |           |                 |                 |                   |
| 1        | 5        |             |                              | 319.676397 | 1274.676  | 4         |           |         |       | 1274.675552 | 24.9      | VSVHVIEGDHR       |           |           |                 |                 |                   |
| 1        | 5        |             |                              | 646.39179  | 1290.769  | 2         |           |         |       | 1290.768402 | 48.68     | LQVVDQPLPVR       |           |           |                 |                 |                   |
| 1        | 5        |             |                              | 665.858609 | 1329.703  | 2         |           |         |       | 1329.698669 | 31.66     | AALQEELQLCK       |           |           |                 |                 |                   |
| 1        | 5        |             |                              | 453.58996  | 1357.748  | 3         |           |         |       | 1357.749084 | 34.11     | VTAIHDPATHR       |           |           |                 |                 |                   |
| 1        | 5        |             |                              | 340.444759 | 1357.75   | 4         |           |         |       | 1357.749084 | 27.72     | VTAIHDPATHR       |           |           |                 |                 |                   |
| 1        | 5        |             |                              | 391.972527 | 1563.861  | 4         |           |         |       | 1563.854553 | 43.52     | VVEVLAGHGHLYSR    |           |           |                 |                 |                   |
| 1        | 5        |             |                              | 821.43429  | 1640.854  | 2         |           |         |       | 1640.850632 | 80.7      | EDGLAQQQTQLNLR    |           |           |                 |                 |                   |
| 1        | 5        |             |                              | 821.43429  | 1640.854  | 2         |           |         |       | 1640.850632 | 85.02     | EDGLAQQQTQLNLR    |           |           |                 |                 |                   |
| 1        | 5        |             |                              | 821.43429  | 1640.854  | 2         |           |         |       | 1640.850632 | 41.75     | EDGLAQQQTQLNLR    |           |           |                 |                 |                   |
| 1        | 5        |             |                              | 832.900503 | 1663.786  | 2         |           |         |       | 1663.78009  | 29.85     | CTVFHGAQVEDAFR    |           |           |                 |                 |                   |
| 1        | 6        | IPI00296337 | Isoform 1 of DNA-depende     | 497.272277 | 992.53    | 2         | 4         | 3.36    | 1.78  | 992.531525  | 28.9      | SLNSIEFR          | 497.2723  | 499.2848  | 4.19            | 1.89            | 2.22              |
| 1        | 6        |             |                              | 602.333737 | 1202.653  | 2         |           |         |       | 1202.653107 | 36.27     | VTELALTASDR       | 602.3337  | 604.3463  | 11.4            | 3.77            | 3.02              |
| 1        | 6        |             |                              | 602.801598 | 1203.589  | 2         |           |         |       | 1203.594223 | 21.87     | LACDQVQVTR        | 602.8016  | 604.8142  | 7.51            | 3.37            | 2.23              |
| 1        | 6        |             |                              | 664.883176 | 1327.752  | 2         |           |         |       | 1327.748398 | 51.82     | QITQSALLAEAR      |           |           |                 |                 |                   |
| 1        | 6        |             |                              | 801.92458  | 1601.835  | 2         |           |         |       | 1601.828476 | 50.86     | NLSSNEAISLEEIR    |           |           |                 |                 |                   |
| 1        | 6        |             |                              | 801.92458  | 1601.835  | 2         |           |         |       | 1601.828476 | 31.65     | NLSSNEAISLEEIR    |           |           |                 |                 |                   |
| 1        | 6        |             |                              | 692.324192 | 2073.951  | 3         |           |         |       | 2073.941879 | 40.87     | SLGTIQCCDAIDHLCR  | 692.3242  | 693.6659  | 12.4            | 2.08            | 5.96              |
| 1        | 6        | IPI00376215 | Isoform 2 of DNA-depende     | 497.272277 | 992.53    | 2         | 4         | 3.36    | 1.78  | 992.531525  | 28.9      | SLNSIEFR          |           |           |                 |                 |                   |
| 1        | 6        |             |                              | 602.333737 | 1202.653  | 2         |           |         |       | 1202.653107 | 36.27     | VTELALTASDR       |           |           |                 |                 |                   |
| 1        | 6        |             |                              | 602.801598 | 1203.589  | 2         |           |         |       | 1203.594223 | 21.87     | LACDQVQVTR        |           |           |                 |                 |                   |
| 1        | 6        |             |                              | 664.883176 | 1327.752  | 2         |           |         |       | 1327.748398 | 51.82     | QITQSALLAEAR      |           |           |                 |                 |                   |
| 1        | 6        |             |                              | 801.92458  | 1601.835  | 2         |           |         |       | 1601.828476 | 50.86     | NLSSNEAISLEEIR    |           |           |                 |                 |                   |
| 1        | 6        |             |                              | 801.92458  | 1601.835  | 2         |           |         |       | 1601.828476 | 31.65     | NLSSNEAISLEEIR    |           |           |                 |                 |                   |
| 1        | 6        |             |                              | 692.324192 | 2073.951  | 3         |           |         |       | 2073.941879 | 40.87     | SLGTIQCCDAIDHLCR  |           |           |                 |                 |                   |
| 1        | 6        | IPI00786995 | PREDICTED: similar to prc    | 497.272277 | 992.53    | 2         | 4         | 3.36    | 1.78  | 992.531525  | 28.9      | SLNSIEFR          |           |           |                 |                 |                   |
| 1        | 6        |             |                              | 602.333737 | 1202.653  | 2         |           |         |       | 1202.653107 | 36.27     | VTELALTASDR       |           |           |                 |                 |                   |
| 1        | 6        |             |                              | 602.801598 | 1203.589  | 2         |           |         |       | 1203.594223 | 21.87     | LACDQVQVTR        |           |           |                 |                 |                   |
| 1        | 6        |             |                              | 664.883176 | 1327.752  | 2         |           |         |       | 1327.748398 | 51.82     | QITQSALLAEAR      |           |           |                 |                 |                   |
| 1        | 6        |             |                              | 801.92458  | 1601.835  | 2         |           |         |       | 1601.828476 | 50.86     | NLSSNEAISLEEIR    |           |           |                 |                 |                   |
| 1        | 6        |             |                              | 801.92458  | 1601.835  | 2         |           |         |       | 1601.828476 | 31.65     | NLSSNEAISLEEIR    |           |           |                 |                 |                   |
| 1        | 6        |             |                              | 692.324192 | 2073.951  | 3         |           |         |       | 2073.941879 | 40.87     | SLGTIQCCDAIDHLCR  |           |           |                 |                 |                   |
| 1        | 7        | IPI00301263 | CAD protein                  | 486.283614 | 1455.829  | 3         | 1         | 2.35    | 0.00  | 1455.833466 | 59.03     | IIAHAQLLEQHR      | 486.2836  | 487.6253  | 9.69            | 4.12            | 2.35              |
| 1        | 7        |             |                              | 486.283614 | 1455.829  | 3         |           |         |       | 1455.833466 | 35.14     | IIAHAQLLEQHR      |           |           |                 |                 |                   |
| 1        | 7        |             |                              | 486.283614 | 1455.829  | 3         |           |         |       | 1455.833466 | 44.1      | IIAHAQLLEQHR      |           |           |                 |                 |                   |
| 1        | 8        | IPI00291607 | Inositol 1,4,5-trisphosphate | 452.727757 | 903.441   | 2         | 2         | 6.22    | 3.32  | 903.432236  | 21.11     | QNNTENK           |           |           |                 |                 |                   |
| 1        | 8        |             |                              | 642.810749 | 1283.607  | 2         |           |         |       | 1283.602676 | 26.28     | TTCFCGLER         | 642.8108  | 6444.823  | 72.9            | 8.51            | 8.57              |
| 1        | 8        |             |                              | 491.255565 | 1470.745  | 3         |           |         |       | 1470.742599 | 31.47     | FLQLLCENHNR       | 491.2556  | 492.5973  | 4.91            | 1.27            | 3.87              |
| 1        | 8        |             |                              | 945.949578 | 1889.885  | 2         |           |         |       | 1889.881287 | 29.9      | AMSLVSNEGEGEQNEIR |           |           |                 |                 |                   |
| 1        | 9        | IPI00456969 | Dynein heavy chain, cytos    | 489.765453 | 977.5164  | 2         | 2         | 1.74    | 0.49  | 977.520615  | 26.15     | AELGEYIR          | 489.7655  | 491.778   | 2.11            | 1.01            | 2.09              |
| 1        | 9        |             |                              | 664.863039 | 1327.712  | 2         |           |         |       | 1327.71199  | 36.48     | GNEIVLSAGSTPR     | 664.863   | 666.8756  | 3.54            | 2.53            | 1.40              |
| 1        | 9        |             |                              | 828.916117 | 1655.818  | 2         |           |         |       | 1655.811401 | 20.98     | IQFVGACNPPTDPR    |           |           |                 |                 |                   |
| 1        | 9        | IPI00477531 | 532 kDa protein              | 489.765453 | 977.5164  | 2         | 2         | 1.74    | 0.49  | 977.520615  | 26.15     | AELGEYIR          |           |           |                 |                 |                   |
| 1        | 9        |             |                              | 664.863039 | 1327.712  | 2         |           |         |       | 1327.71199  | 36.48     | GNEIVLSAGSTPR     |           |           |                 |                 |                   |
| 1        | 9        |             |                              | 828.916117 | 1655.818  | 2         |           |         |       | 1655.811401 | 20.98     | IQFVGACNPPTDPR    |           |           |                 |                 |                   |
| 1        | 10       | IPI00176345 | Isoform 3 of Netrin recepto  | 566.303666 | 1130.593  | 2         | 1         | L       | 0.00  | 1130.599609 | 35.05     | NFEQEPLAK         | 566.3037  | 570.3288  | 4               |                 | 0 L               |
| 1        | 10       | IPI00418573 | Isoform 2 of Netrin recepto  | 566.303666 | 1130.593  | 2         | 1         | L       | 0.00  | 1130.599609 | 35.05     | NFEQEPLAK         |           |           |                 |                 |                   |
| 1        | 10       | IPI00470692 | Isoform 1 of Netrin recepto  | 566.303666 | 1130.593  | 2         | 1         | L       | 0.00  | 1130.599609 | 35.05     | NFEQEPLAK         |           |           |                 |                 |                   |
| 1        | 11       | IPI00174962 | Molecule interacting with R  | 564.343829 | 1126.673  | 2         | 1         | L       | 0.00  | 1126.662216 | 30.39     | EAEPEGKKK         | 564.3438  | 572.3941  | 5.45            |                 | 0 L               |
| 1        | 12       | IPI00442351 | FLJ00288 protein (Fragme     | 572.787492 | 1143.56   | 2         | 1         | 4.52    | 0.00  | 1143.550629 | 30.03     | ELDMSPGDPK        | 572.7875  | 576.8126  | 10.4            | 2.3             | 4.52              |
| 2        | 1        | IPI00420004 | myosin IG                    | 322.211667 | 642.4088  | 2         | 13        | 6.65    | 2.18  | 642.408905  | 23.21     | DLVLR             |           |           |                 |                 |                   |
| 2        | 1        |             |                              | 419.729138 | 837.4437  | 2         |           |         |       | 837.440918  | 33.65     | EPFYVR            | 419.7291  | 421.7417  | 19              | 3.61            | 5.26              |
| 2        | 1        |             |                              | 448.257806 | 894.5011  | 2         |           |         |       | 894.502151  | 31.3      | AIYTIMR           |           |           |                 |                 |                   |

| Band num | prot_hit_nu | prot_acc | prot_desc | pep_exp_mz | pep_exp_n | pep_exp_z | quantific | average | stdev | pep_calc_mr | pep_score | pep_seq         | light m/z | heavy m/z | light intensity | heavy intensity | ratio light/heavy |  |
|----------|-------------|----------|-----------|------------|-----------|-----------|-----------|---------|-------|-------------|-----------|-----------------|-----------|-----------|-----------------|-----------------|-------------------|--|
| 2        | 1           |          |           | 456.255578 | 910.4966  | 2         |           |         |       | 910.49707   | 24.93     | AIYTIMR         |           |           |                 |                 |                   |  |
| 2        | 1           |          |           | 483.280234 | 964.5459  | 2         |           |         |       | 964.547852  | 35.45     | AHLAELQR        | 483.2803  | 485.2929  | 66              | 8.73            | 7.56              |  |
| 2        | 1           |          |           | 483.280283 | 964.546   | 2         |           |         |       | 964.547852  | 34.23     | AHLAELQR        |           |           |                 |                 |                   |  |
| 2        | 1           |          |           | 483.280296 | 964.546   | 2         |           |         |       | 964.547852  | 39.79     | AHLAELQR        |           |           |                 |                 |                   |  |
| 2        | 1           |          |           | 322.523229 | 964.5479  | 3         |           |         |       | 964.547852  | 24.3      | AHLAELQR        |           |           |                 |                 |                   |  |
| 2        | 1           |          |           | 322.523243 | 964.5479  | 3         |           |         |       | 964.547852  | 21.83     | AHLAELQR        |           |           |                 |                 |                   |  |
| 2        | 1           |          |           | 487.260982 | 972.5074  | 2         |           |         |       | 972.508682  | 23.75     | INSVMEPR        |           |           |                 |                 |                   |  |
| 2        | 1           |          |           | 487.260984 | 972.5074  | 2         |           |         |       | 972.508682  | 22.57     | INSVMEPR        |           |           |                 |                 |                   |  |
| 2        | 1           |          |           | 495.258768 | 988.503   | 2         |           |         |       | 988.503601  | 34.29     | INSVMEPR        | 495.2588  | 497.2713  | 11.2            | 2.02            | 5.54              |  |
| 2        | 1           |          |           | 537.812243 | 1073.61   | 2         |           |         |       | 1073.610519 | 48.55     | TLVTLEQSR       | 537.8122  | 539.8248  | 43.1            | 7.21            | 5.98              |  |
| 2        | 1           |          |           | 537.812243 | 1073.61   | 2         |           |         |       | 1073.610519 | 60.86     | TLVTLEQSR       |           |           |                 |                 |                   |  |
| 2        | 1           |          |           | 537.812248 | 1073.61   | 2         |           |         |       | 1073.610519 | 53.13     | TLVTLEQSR       |           |           |                 |                 |                   |  |
| 2        | 1           |          |           | 557.824629 | 1113.635  | 2         |           |         |       | 1113.635254 | 52.49     | VAAMGALQGLR     | 557.8245  | 559.8372  | 31.1            | 7               | 4.44              |  |
| 2        | 1           |          |           | 557.824629 | 1113.635  | 2         |           |         |       | 1113.635254 | 60.11     | VAAMGALQGLR     |           |           |                 |                 |                   |  |
| 2        | 1           |          |           | 557.824629 | 1113.635  | 2         |           |         |       | 1113.635254 | 67.98     | VAAMGALQGLR     |           |           |                 |                 |                   |  |
| 2        | 1           |          |           | 565.822683 | 1129.631  | 2         |           |         |       | 1129.630173 | 56.52     | VAAMGALQGLR     |           |           |                 |                 |                   |  |
| 2        | 1           |          |           | 565.822683 | 1129.631  | 2         |           |         |       | 1129.630173 | 47.98     | VAAMGALQGLR     |           |           |                 |                 |                   |  |
| 2        | 1           |          |           | 565.822687 | 1129.631  | 2         |           |         |       | 1129.630173 | 63.84     | VAAMGALQGLR     |           |           |                 |                 |                   |  |
| 2        | 1           |          |           | 401.560396 | 1201.659  | 3         |           |         |       | 1201.659195 | 36.87     | QLHELHLER       |           |           |                 |                 |                   |  |
| 2        | 1           |          |           | 606.314718 | 1210.615  | 2         |           |         |       | 1210.615295 | 54.65     | VSDCIPLSHR      | 606.3147  | 608.3273  | 13.1            | 1.95            | 6.72              |  |
| 2        | 1           |          |           | 606.314718 | 1210.615  | 2         |           |         |       | 1210.615295 | 56.01     | VSDCIPLSHR      |           |           |                 |                 |                   |  |
| 2        | 1           |          |           | 606.314718 | 1210.615  | 2         |           |         |       | 1210.615295 | 50.04     | VSDCIPLSHR      |           |           |                 |                 |                   |  |
| 2        | 1           |          |           | 660.863912 | 1319.713  | 2         |           |         |       | 1319.710968 | 56.07     | LLYNSTDPTLR     | 660.8639  | 662.8765  | 40.9            | 5.24            | 7.81              |  |
| 2        | 1           |          |           | 660.863912 | 1319.713  | 2         |           |         |       | 1319.710968 | 41.76     | LLYNSTDPTLR     |           |           |                 |                 |                   |  |
| 2        | 1           |          |           | 660.863912 | 1319.713  | 2         |           |         |       | 1319.710968 | 45.81     | LLYNSTDPTLR     |           |           |                 |                 |                   |  |
| 2        | 1           |          |           | 660.86393  | 1319.713  | 2         |           |         |       | 1319.710968 | 36.63     | LLYNSTDPTLR     |           |           |                 |                 |                   |  |
| 2        | 1           |          |           | 447.231839 | 1338.674  | 3         |           |         |       | 1338.673859 | 37.37     | GQDDLIVVCLHR    |           |           |                 |                 |                   |  |
| 2        | 1           |          |           | 447.231839 | 1338.674  | 3         |           |         |       | 1338.673859 | 34.59     | GQDDLIVVCLHR    |           |           |                 |                 |                   |  |
| 2        | 1           |          |           | 447.231839 | 1338.674  | 3         |           |         |       | 1338.673859 | 44.07     | GQDDLIVVCLHR    |           |           |                 |                 |                   |  |
| 2        | 1           |          |           | 670.345608 | 1338.677  | 2         |           |         |       | 1338.673859 | 80.04     | GQDDLIVVCLHR    | 670.3456  | 672.3582  | 88.8            | 7.71            | 11.52             |  |
| 2        | 1           |          |           | 670.345608 | 1338.677  | 2         |           |         |       | 1338.673859 | 70.79     | GQDDLIVVCLHR    |           |           |                 |                 |                   |  |
| 2        | 1           |          |           | 448.263028 | 1341.767  | 3         |           |         |       | 1341.768082 | 54.76     | ALLLTDQHLYK     |           |           |                 |                 |                   |  |
| 2        | 1           |          |           | 676.838134 | 1351.662  | 2         |           |         |       | 1351.657852 | 75.5      | STCVLEAFGNAR    | 676.8331  | 678.8507  | 15.9            | 1.78            | 8.93              |  |
| 2        | 1           |          |           | 676.838134 | 1351.662  | 2         |           |         |       | 1351.657852 | 78.48     | STCVLEAFGNAR    |           |           |                 |                 |                   |  |
| 2        | 1           |          |           | 676.838134 | 1351.662  | 2         |           |         |       | 1351.657852 | 73.88     | STCVLEAFGNAR    |           |           |                 |                 |                   |  |
| 2        | 1           |          |           | 676.838134 | 1351.662  | 2         |           |         |       | 1351.657852 | 72.01     | STCVLEAFGNAR    |           |           |                 |                 |                   |  |
| 2        | 1           |          |           | 457.606787 | 1369.799  | 3         |           |         |       | 1369.799393 | 41.26     | ALLLTDQHLYK     |           |           |                 |                 |                   |  |
| 2        | 1           |          |           | 457.606798 | 1369.799  | 3         |           |         |       | 1369.799393 | 52.85     | ALLLTDQHLYK     |           |           |                 |                 |                   |  |
| 2        | 1           |          |           | 457.606805 | 1369.799  | 3         |           |         |       | 1369.799393 | 25.79     | ALLLTDQHLYK     |           |           |                 |                 |                   |  |
| 2        | 1           |          |           | 470.262206 | 1407.765  | 3         |           |         |       | 1407.76474  | 33.07     | IFLQTLDTHHR     |           |           |                 |                 |                   |  |
| 2        | 1           |          |           | 470.262206 | 1407.765  | 3         |           |         |       | 1407.76474  | 34.87     | IFLQTLDTHHR     |           |           |                 |                 |                   |  |
| 2        | 1           |          |           | 470.262206 | 1407.765  | 3         |           |         |       | 1407.76474  | 45.23     | IFLQTLDTHHR     |           |           |                 |                 |                   |  |
| 2        | 1           |          |           | 704.891679 | 1407.769  | 2         |           |         |       | 1407.76474  | 70.95     | IFLQTLDTHHR     | 704.8917  | 706.9042  | 19.2            | 4.95            | 3.88              |  |
| 2        | 1           |          |           | 704.891679 | 1407.769  | 2         |           |         |       | 1407.76474  | 71.57     | IFLQTLDTHHR     |           |           |                 |                 |                   |  |
| 2        | 1           |          |           | 538.283344 | 1611.828  | 3         |           |         |       | 1611.828064 | 42.75     | VIGFSPEEVESVHR  |           |           |                 |                 |                   |  |
| 2        | 1           |          |           | 538.283391 | 1611.828  | 3         |           |         |       | 1611.828064 | 54.22     | VIGFSPEEVESVHR  |           |           |                 |                 |                   |  |
| 2        | 1           |          |           | 538.28342  | 1611.828  | 3         |           |         |       | 1611.828064 | 75.65     | VIGFSPEEVESVHR  |           |           |                 |                 |                   |  |
| 2        | 1           |          |           | 538.283421 | 1611.828  | 3         |           |         |       | 1611.828064 | 66.54     | VIGFSPEEVESVHR  |           |           |                 |                 |                   |  |
| 2        | 1           |          |           | 806.923604 | 1611.833  | 2         |           |         |       | 1611.828064 | 69.7      | VIGFSPEEVESVHR  | 806.9236  | 808.9362  | 9.43            | 1.16            | 8.13              |  |
| 2        | 1           |          |           | 806.923604 | 1611.833  | 2         |           |         |       | 1611.828064 | 87.87     | VIGFSPEEVESVHR  |           |           |                 |                 |                   |  |
| 2        | 1           |          |           | 806.923604 | 1611.833  | 2         |           |         |       | 1611.828064 | 30.43     | VIGFSPEEVESVHR  |           |           |                 |                 |                   |  |
| 2        | 1           |          |           | 806.923611 | 1611.833  | 2         |           |         |       | 1611.828064 | 77.56     | VIGFSPEEVESVHR  |           |           |                 |                 |                   |  |
| 2        | 1           |          |           | 806.923611 | 1611.833  | 2         |           |         |       | 1611.828064 | 94.76     | VIGFSPEEVESVHR  |           |           |                 |                 |                   |  |
| 2        | 1           |          |           | 873.925954 | 1745.837  | 2         |           |         |       | 1745.831879 | 44.43     | AMWPDGQQDITEVTK |           |           |                 |                 |                   |  |
| 2        | 1           |          |           | 873.925954 | 1745.837  | 2         |           |         |       | 1745.831879 | 58.55     | AMWPDGQQDITEVTK |           |           |                 |                 |                   |  |
| 2        | 1           |          |           | 873.925954 | 1745.837  | 2         |           |         |       | 1745.831879 | 36.18     | AMWPDGQQDITEVTK |           |           |                 |                 |                   |  |
| 2        | 1           |          |           | 881.922794 | 1761.831  | 2         |           |         |       | 1761.826797 | 64.28     | AMWPDGQQDITEVTK |           |           |                 |                 |                   |  |
| 2        | 1           |          |           | 881.922794 | 1761.831  | 2         |           |         |       | 1761.826797 | 55.85     | AMWPDGQQDITEVTK |           |           |                 |                 |                   |  |
| 2        | 1           |          |           | 881.922794 | 1761.831  | 2         |           |         |       | 1761.826797 | 59.44     | AMWPDGQQDITEVTK |           |           |                 |                 |                   |  |
| 2        | 1           |          |           | 881.922794 | 1761.831  | 2         |           |         |       | 1761.826797 | 24.5      | AMWPDGQQDITEVTK |           |           |                 |                 |                   |  |
| 2        | 1           |          |           | 886.9631   | 1771.912  | 2         |           |         |       | 1771.906372 | 41.17     | HIMQYIAAVTNPSQR |           |           |                 |                 |                   |  |
| 2        | 1           |          |           | 886.9631   | 1771.912  | 2         |           |         |       | 1771.906372 | 42.58     | HIMQYIAAVTNPSQR |           |           |                 |                 |                   |  |
| 2        | 1           |          |           | 886.9631   | 1771.912  | 2         |           |         |       | 1771.906372 | 50.45     | HIMQYIAAVTNPSQR |           |           |                 |                 |                   |  |



| Band num | prot_hit_nu | prot_acc    | prot_desc                 | pep_exp_mz | pep_exp_n | pep_exp_z | quantific | average | stdev | pep_calc_mr | pep_score | pep_seq              | light m/z | heavy m/z | light intensity | heavy intensity | ratio light/heavy |
|----------|-------------|-------------|---------------------------|------------|-----------|-----------|-----------|---------|-------|-------------|-----------|----------------------|-----------|-----------|-----------------|-----------------|-------------------|
| 2        | 1           |             |                           | 593.977619 | 1778.911  | 3         |           |         |       | 1778.912125 | 59.72     | VGELVGVLAAHCCQGEGR   |           |           |                 |                 |                   |
| 2        | 1           |             |                           | 593.977619 | 1778.911  | 3         |           |         |       | 1778.912125 | 52.36     | VGELVGVLAAHCCQGEGR   |           |           |                 |                 |                   |
| 2        | 1           |             |                           | 593.977621 | 1778.911  | 3         |           |         |       | 1778.912125 | 62.63     | VGELVGVLAAHCCQGEGR   |           |           |                 |                 |                   |
| 2        | 1           |             |                           | 593.977621 | 1778.911  | 3         |           |         |       | 1778.912125 | 63.9      | VGELVGVLAAHCCQGEGR   |           |           |                 |                 |                   |
| 2        | 1           |             |                           | 890.465878 | 1778.917  | 2         |           |         |       | 1778.912125 | 98.52     | VGELVGVLAAHCCQGEGR   | 890.4659  | 892.4784  | 37              | 5.39            | 6.86              |
| 2        | 1           |             |                           | 890.465878 | 1778.917  | 2         |           |         |       | 1778.912125 | 94.22     | VGELVGVLAAHCCQGEGR   |           |           |                 |                 |                   |
| 2        | 1           |             |                           | 890.465878 | 1778.917  | 2         |           |         |       | 1778.912125 | 100.1     | VGELVGVLAAHCCQGEGR   |           |           |                 |                 |                   |
| 2        | 1           |             |                           | 895.939186 | 1789.864  | 2         |           |         |       | 1789.858109 | 68.65     | AMWPDGQQDITEVTK      |           |           |                 |                 |                   |
| 2        | 1           |             |                           | 895.939186 | 1789.864  | 2         |           |         |       | 1789.858109 | 69.96     | AMWPDGQQDITEVTK      | 895.9392  | 899.9643  | 27.1            | 6.99            | 3.88              |
| 2        | 1           |             |                           | 895.939186 | 1789.864  | 2         |           |         |       | 1789.858109 | 59.99     | AMWPDGQQDITEVTK      |           |           |                 |                 |                   |
| 2        | 1           |             |                           | 895.939186 | 1789.864  | 2         |           |         |       | 1789.858109 | 66.57     | AMWPDGQQDITEVTK      |           |           |                 |                 |                   |
| 2        | 1           |             |                           | 646.344582 | 1936.012  | 3         |           |         |       | 1936.007843 | 25.93     | LISVEPRPEQPEPDFR     |           |           |                 |                 |                   |
| 2        | 1           |             |                           | 646.344582 | 1936.012  | 3         |           |         |       | 1936.007843 | 35.21     | LISVEPRPEQPEPDFR     |           |           |                 |                 |                   |
| 2        | 1           |             |                           | 646.344597 | 1936.012  | 3         |           |         |       | 1936.007843 | 30.76     | LISVEPRPEQPEPDFR     |           |           |                 |                 |                   |
| 2        | 1           |             |                           | 969.014352 | 1936.014  | 2         |           |         |       | 1936.007843 | 25.53     | LISVEPRPEQPEPDFR     |           |           |                 |                 |                   |
| 2        | 1           |             |                           | 969.014352 | 1936.014  | 2         |           |         |       | 1936.007843 | 35.15     | LISVEPRPEQPEPDFR     |           |           |                 |                 |                   |
| 2        | 2           | IPI00186290 | Elongation factor 2       | 459.774951 | 917.5354  | 2         | 7         | 3.68    | 1.32  | 917.535873  | 30.61     | FSVSPVVR             | 459.7749  | 461.7875  | 20.6            | 6.59            | 3.13              |
| 2        | 2           |             |                           | 459.774951 | 917.5354  | 2         |           |         |       | 917.535873  | 25.47     | FSVSPVVR             |           |           |                 |                 |                   |
| 2        | 2           |             |                           | 459.774951 | 917.5354  | 2         |           |         |       | 917.535873  | 24.32     | FSVSPVVR             |           |           |                 |                 |                   |
| 2        | 2           |             |                           | 475.751445 | 949.4883  | 2         |           |         |       | 949.489334  | 32.31     | SDPVVSYR             | 475.7515  | 477.764   | 5.92            | 1.79            | 3.31              |
| 2        | 2           |             |                           | 499.293437 | 996.5723  | 2         |           |         |       | 996.574051  | 53.89     | GGQIIPAR             | 499.2935  | 501.306   | 13.2            | 2.35            | 5.62              |
| 2        | 2           |             |                           | 499.293453 | 996.5724  | 2         |           |         |       | 996.574051  | 56.59     | GGQIIPAR             |           |           |                 |                 |                   |
| 2        | 2           |             |                           | 560.310046 | 1118.606  | 2         |           |         |       | 1118.61084  | 38.74     | VNFTVDQIR            | 560.3101  | 562.3226  | 27              | 7.83            | 3.45              |
| 2        | 2           |             |                           | 560.311002 | 1118.607  | 2         |           |         |       | 1118.61084  | 31.9      | VNFTVDQIR            |           |           |                 |                 |                   |
| 2        | 2           |             |                           | 560.311002 | 1118.607  | 2         |           |         |       | 1118.61084  | 35.55     | VNFTVDQIR            |           |           |                 |                 |                   |
| 2        | 2           |             |                           | 576.301288 | 1150.588  | 2         |           |         |       | 1150.592834 | 31.26     | STLTDLSLVCK          |           |           |                 |                 |                   |
| 2        | 2           |             |                           | 582.357136 | 1162.7    | 2         |           |         |       | 1162.698578 | 52        | VFSLVSTGLK           | 582.3571  | 586.3823  | 52.7            | 9.78            | 5.39              |
| 2        | 2           |             |                           | 582.357136 | 1162.7    | 2         |           |         |       | 1162.698578 | 54.54     | VFSLVSTGLK           |           |           |                 |                 |                   |
| 2        | 2           |             |                           | 583.779842 | 1165.545  | 2         |           |         |       | 1165.542816 | 43.03     | YEWVDAEAR            |           |           |                 |                 |                   |
| 2        | 2           |             |                           | 583.779842 | 1165.545  | 2         |           |         |       | 1165.542816 | 39.13     | YEWVDAEAR            |           |           |                 |                 |                   |
| 2        | 2           |             |                           | 590.320236 | 1178.626  | 2         |           |         |       | 1178.624146 | 30.96     | STLTDLSLVCK          |           |           |                 |                 |                   |
| 2        | 2           |             |                           | 703.880825 | 1405.747  | 2         |           |         |       | 1405.741211 | 65.62     | CLYASVLTAAQPR        | 703.8808  | 705.8934  | 15.8            | 7.25            | 2.18              |
| 2        | 2           |             |                           | 703.880825 | 1405.747  | 2         |           |         |       | 1405.741211 | 68.99     | CLYASVLTAAQPR        |           |           |                 |                 |                   |
| 2        | 2           |             |                           | 811.904583 | 1621.795  | 2         |           |         |       | 1621.789322 | 93.15     | ETVSEESNVLCLSK       |           |           |                 |                 |                   |
| 2        | 2           |             |                           | 811.904583 | 1621.795  | 2         |           |         |       | 1621.789322 | 72.73     | ETVSEESNVLCLSK       |           |           |                 |                 |                   |
| 2        | 2           |             |                           | 811.904583 | 1621.795  | 2         |           |         |       | 1621.789322 | 91.88     | ETVSEESNVLCLSK       |           |           |                 |                 |                   |
| 2        | 2           |             |                           | 548.605186 | 1642.794  | 3         |           |         |       | 1642.791016 | 49.25     | TGTTTFEHAHNMNR       | 548.6052  | 549.9469  | 11.2            | 4.18            | 2.68              |
| 2        | 2           |             |                           | 825.920103 | 1649.826  | 2         |           |         |       | 1649.820633 | 104.71    | ETVSEESNVLCLSK       |           |           |                 |                 |                   |
| 2        | 2           |             |                           | 825.920103 | 1649.826  | 2         |           |         |       | 1649.820633 | 77.34     | ETVSEESNVLCLSK       |           |           |                 |                 |                   |
| 2        | 2           |             |                           | 825.920103 | 1649.826  | 2         |           |         |       | 1649.820633 | 90.41     | ETVSEESNVLCLSK       |           |           |                 |                 |                   |
| 2        | 2           |             |                           | 825.920103 | 1649.826  | 2         |           |         |       | 1649.820633 | 58.52     | ETVSEESNVLCLSK       |           |           |                 |                 |                   |
| 2        | 2           |             |                           | 825.920103 | 1649.826  | 2         |           |         |       | 1649.820633 | 79.8      | ETVSEESNVLCLSK       |           |           |                 |                 |                   |
| 2        | 2           |             |                           | 415.703702 | 1658.786  | 4         |           |         |       | 1658.785934 | 30.11     | TGTTTFEHAHNMNR       |           |           |                 |                 |                   |
| 2        | 2           |             |                           | 553.936188 | 1658.787  | 3         |           |         |       | 1658.785934 | 27.14     | TGTTTFEHAHNMNR       |           |           |                 |                 |                   |
| 2        | 2           |             |                           | 724.381616 | 2170.123  | 3         |           |         |       | 2170.104233 | 51.1      | ARPPFDGLAEDIDKGEVSAR |           |           |                 |                 |                   |
| 2        | 3           | IPI00006482 | Isoform Long of Sodium/pc | 386.240621 | 770.4667  | 2         | 3         | 3.11    | 2.17  | 770.467468  | 30.27     | AAEILAR              |           |           |                 |                 |                   |
| 2        | 3           |             |                           | 337.526909 | 1009.559  | 3         |           |         |       | 1009.55809  | 49.31     | LSDLHLR              | 630.3469  | 634.372   | 2.17            | 0.39            | 5.56              |
| 2        | 3           |             |                           | 558.316931 | 1114.619  | 2         |           |         |       | 1114.619293 | 25.92     | LIIVEGCQR            |           |           |                 |                 |                   |
| 2        | 3           |             |                           | 558.316931 | 1114.619  | 2         |           |         |       | 1114.619293 | 37.1      | LIIVEGCQR            |           |           |                 |                 |                   |
| 2        | 3           |             |                           | 630.348021 | 1258.681  | 2         |           |         |       | 1258.679291 | 58.08     | AVAGDASESALLK        |           |           |                 |                 |                   |
| 2        | 3           |             |                           | 632.874668 | 1263.735  | 2         |           |         |       | 1263.732346 | 49.19     | LNIPVQVNPQR          |           |           |                 |                 |                   |
| 2        | 3           |             |                           | 632.874668 | 1263.735  | 2         |           |         |       | 1263.732346 | 51.01     | LNIPVQVNPQR          |           |           |                 |                 |                   |
| 2        | 3           |             |                           | 632.874777 | 1263.735  | 2         |           |         |       | 1263.732346 | 38.42     | LNIPVQVNPQR          |           |           |                 |                 |                   |
| 2        | 3           |             |                           | 656.876988 | 1311.739  | 2         |           |         |       | 1311.735718 | 29.09     | NMVPQQALVIR          |           |           |                 |                 |                   |
| 2        | 3           |             |                           | 659.379362 | 1316.744  | 2         |           |         |       | 1316.736435 | 26.75     | IVEIPFNSTNK          |           |           |                 |                 |                   |
| 2        | 3           |             |                           | 774.372094 | 1546.73   | 2         |           |         |       | 1546.72879  | 39.75     | SPDFTNENPLETR        |           |           |                 |                 |                   |
| 2        | 3           |             |                           | 774.372803 | 1546.731  | 2         |           |         |       | 1546.72879  | 70.89     | SPDFTNENPLETR        | 774.3717  | 776.3842  | 2.33            | 1.01            | 2.31              |
| 2        | 3           |             |                           | 824.399133 | 1646.784  | 2         |           |         |       | 1646.777191 | 56.15     | VDNSSLTGESEPOTR      |           |           |                 |                 |                   |
| 2        | 3           |             |                           | 824.399133 | 1646.784  | 2         |           |         |       | 1646.777191 | 83.22     | VDNSSLTGESEPOTR      |           |           |                 |                 |                   |
| 2        | 3           |             |                           | 824.399133 | 1646.784  | 2         |           |         |       | 1646.777191 | 74.26     | VDNSSLTGESEPOTR      |           |           |                 |                 |                   |
| 2        | 3           |             |                           | 824.399133 | 1646.784  | 2         |           |         |       | 1646.777191 | 91.98     | VDNSSLTGESEPOTR      | 824.3959  | 826.4084  | 2.45            | 1.68            | 1.46              |
| 2        | 3           |             |                           | 824.399133 | 1646.784  | 2         |           |         |       | 1646.777191 | 81.96     | VDNSSLTGESEPOTR      |           |           |                 |                 |                   |
| 2        | 4           | IPI00011062 | Isoform 1 of Carbamoyl-ph | 447.241019 | 892.4675  | 2         | 3         | 2.33    | 1.91  | 892.467865  | 24.15     | FLEEATR              |           |           |                 |                 |                   |

| Band num | prot_hit | nu          | prot_acc | prot_desc                  | pep_exp_mz | pep_exp_n | pep_exp_z | quantific | average | stdev | pep_calc_mr | pep_score | pep_seq            | light m/z | heavy m/z | light intensity | heavy intensity | ratio light/heavy |
|----------|----------|-------------|----------|----------------------------|------------|-----------|-----------|-----------|---------|-------|-------------|-----------|--------------------|-----------|-----------|-----------------|-----------------|-------------------|
| 2        | 4        |             |          |                            | 494.779362 | 987.5442  | 2         |           |         |       | 987.544724  | 21.75     | VVAVDCGIK          |           |           |                 |                 |                   |
| 2        | 4        |             |          |                            | 531.784738 | 1061.555  | 2         |           |         |       | 1061.556335 | 49.98     | SVGEVMAIGR         |           |           |                 |                 |                   |
| 2        | 4        |             |          |                            | 531.784738 | 1061.555  | 2         |           |         |       | 1061.556335 | 60.14     | SVGEVMAIGR         |           |           |                 |                 |                   |
| 2        | 4        |             |          |                            | 532.785932 | 1063.557  | 2         |           |         |       | 1063.557388 | 30.19     | EIEYEVVR           |           |           |                 |                 |                   |
| 2        | 4        |             |          |                            | 532.785932 | 1063.557  | 2         |           |         |       | 1063.557388 | 24.5      | EIEYEVVR           |           |           |                 |                 |                   |
| 2        | 4        |             |          |                            | 532.785932 | 1063.557  | 2         |           |         |       | 1063.557388 | 40.03     | EIEYEVVR           |           |           |                 |                 |                   |
| 2        | 4        |             |          |                            | 559.814873 | 1117.615  | 2         |           |         |       | 1117.615585 | 33.01     | VPAIYVDTR          |           |           |                 |                 |                   |
| 2        | 4        |             |          |                            | 559.814886 | 1117.615  | 2         |           |         |       | 1117.615585 | 21.64     | VPAIYVDTR          |           |           |                 |                 |                   |
| 2        | 4        |             |          |                            | 588.807294 | 1175.6    | 2         |           |         |       | 1175.599304 | 37.87     | CLGLTEAQR          |           |           |                 |                 |                   |
| 2        | 4        |             |          |                            | 588.807294 | 1175.6    | 2         |           |         |       | 1175.599304 | 43.14     | CLGLTEAQR          | 588.8069  | 590.8195  | 1.3             | 2.55            | 0.51              |
| 2        | 4        |             |          |                            | 397.549669 | 1189.627  | 3         |           |         |       | 1189.626816 | 33.72     | FVHDNYVIR          |           |           |                 |                 |                   |
| 2        | 4        |             |          |                            | 397.549695 | 1189.627  | 3         |           |         |       | 1189.626816 | 29.71     | FVHDNYVIR          |           |           |                 |                 |                   |
| 2        | 4        |             |          |                            | 595.821903 | 1189.629  | 2         |           |         |       | 1189.626816 | 25.29     | FVHDNYVIR          |           |           |                 |                 |                   |
| 2        | 4        |             |          |                            | 595.821903 | 1189.629  | 2         |           |         |       | 1189.626816 | 20.2      | FVHDNYVIR          |           |           |                 |                 |                   |
| 2        | 4        |             |          |                            | 629.847244 | 1257.68   | 2         |           |         |       | 1257.677551 | 35.96     | IMGTSPLQIDR        |           |           |                 |                 |                   |
| 2        | 4        |             |          |                            | 637.844415 | 1273.674  | 2         |           |         |       | 1273.67247  | 30.89     | IMGTSPLQIDR        |           |           |                 |                 |                   |
| 2        | 4        |             |          |                            | 810.91515  | 1619.816  | 2         |           |         |       | 1619.811371 | 76.66     | SAYALGGLGSGICPNR   | 810.913   | 812.9255  | 4.06            | 0.94            | 4.32              |
| 2        | 4        |             |          |                            | 810.91515  | 1619.816  | 2         |           |         |       | 1619.811371 | 31.81     | SAYALGGLGSGICPNR   |           |           |                 |                 |                   |
| 2        | 4        |             |          |                            | 810.91515  | 1619.816  | 2         |           |         |       | 1619.811371 | 54.48     | SAYALGGLGSGICPNR   |           |           |                 |                 |                   |
| 2        | 4        |             |          |                            | 826.417518 | 1650.82   | 2         |           |         |       | 1650.815872 | 83.34     | VLGTSVESIMATEDR    |           |           |                 |                 |                   |
| 2        | 4        |             |          |                            | 826.417518 | 1650.82   | 2         |           |         |       | 1650.815872 | 77.5      | VLGTSVESIMATEDR    |           |           |                 |                 |                   |
| 2        | 4        |             |          |                            | 826.417518 | 1650.82   | 2         |           |         |       | 1650.815872 | 82.43     | VLGTSVESIMATEDR    |           |           |                 |                 |                   |
| 2        | 4        |             |          |                            | 826.417518 | 1650.82   | 2         |           |         |       | 1650.815872 | 89.87     | VLGTSVESIMATEDR    | 826.4152  | 828.4278  | 2.64            | 1.22            | 2.16              |
| 2        | 5        | IPI00027230 |          | Endoplasmic precursor      | 496.313588 | 990.6126  | 2         | 6         | 2.88    | 0.52  | 990.6138    | 22.15     | LIINSLYK           | 496.3136  | 498.3261  | 23              | 9.07            | 2.54              |
| 2        | 5        |             |          |                            | 555.291318 | 1108.568  | 2         |           |         |       | 1108.568954 | 29.21     | FAFQAEVNR          | 555.2913  | 557.3039  | 12.8            | 4.66            | 2.75              |
| 2        | 5        |             |          |                            | 555.291318 | 1108.568  | 2         |           |         |       | 1108.568954 | 35.31     | FAFQAEVNR          |           |           |                 |                 |                   |
| 2        | 5        |             |          |                            | 555.291341 | 1108.568  | 2         |           |         |       | 1108.568954 | 43.34     | FAFQAEVNR          |           |           |                 |                 |                   |
| 2        | 5        |             |          |                            | 584.310773 | 1166.607  | 2         |           |         |       | 1166.606812 | 43.6      | LGVIEDHSNR         |           |           |                 |                 |                   |
| 2        | 5        |             |          |                            | 584.310773 | 1166.607  | 2         |           |         |       | 1166.606812 | 24.08     | LGVIEDHSNR         |           |           |                 |                 |                   |
| 2        | 5        |             |          |                            | 389.876573 | 1166.608  | 3         |           |         |       | 1166.606812 | 44.28     | LGVIEDHSNR         | 389.8766  | 391.2183  | 3.27            | 1.15            | 2.84              |
| 2        | 5        |             |          |                            | 589.790164 | 1177.566  | 2         |           |         |       | 1177.563934 | 23.51     | EAESSPFVER         | 589.5192  | 591.8027  | 14.7            | 4.48            | 3.28              |
| 2        | 5        |             |          |                            | 652.342734 | 1302.671  | 2         |           |         |       | 1302.669144 | 64.31     | ELISNASDALDK       |           |           |                 |                 |                   |
| 2        | 5        |             |          |                            | 652.342734 | 1302.671  | 2         |           |         |       | 1302.669144 | 61.41     | ELISNASDALDK       |           |           |                 |                 |                   |
| 2        | 5        |             |          |                            | 666.359674 | 1330.705  | 2         |           |         |       | 1330.700455 | 37.47     | ELISNASDALDK       |           |           |                 |                 |                   |
| 2        | 5        |             |          |                            | 757.400067 | 1512.786  | 2         |           |         |       | 1512.780807 | 124.96    | GVVDSDDLPLNVSR     | 757.4001  | 759.4126  | 10.1            | 2.75            | 3.67              |
| 2        | 5        |             |          |                            | 757.400067 | 1512.786  | 2         |           |         |       | 1512.780807 | 106.23    | GVVDSDDLPLNVSR     |           |           |                 |                 |                   |
| 2        | 5        |             |          |                            | 519.940468 | 1556.8    | 3         |           |         |       | 1556.800507 | 46.15     | LLLVHTDTGVGMTR     |           |           |                 |                 |                   |
| 2        | 5        |             |          |                            | 763.373347 | 2287.098  | 3         |           |         |       | 2287.089371 | 51.71     | FQSSHHTDITSLDQYVER | 763.3734  | 764.7151  | 3.01            | 1.36            | 2.21              |
| 2        | 5        |             |          |                            | 763.373347 | 2287.098  | 3         |           |         |       | 2287.089371 | 52.99     | FQSSHHTDITSLDQYVER |           |           |                 |                 |                   |
| 2        | 6        | IPI00291802 |          | Isoform 3 of LIM domain or | 522.78376  | 1043.553  | 2         | 3         | 2.09    | 0.61  | 1043.553665 | 20.5      | LREEWQR            | 522.7838  | 524.7963  | 11.2            | 7.74            | 1.45              |
| 2        | 6        |             |          |                            | 522.78376  | 1043.553  | 2         |           |         |       | 1043.553665 | 21.82     | LREEWQR            |           |           |                 |                 |                   |
| 2        | 6        |             |          |                            | 621.821086 | 1241.628  | 2         |           |         |       | 1241.627594 | 27.64     | EQVPSGAELER        |           |           |                 |                 |                   |
| 2        | 6        |             |          |                            | 621.821086 | 1241.628  | 2         |           |         |       | 1241.627594 | 34.07     | EQVPSGAELER        |           |           |                 |                 |                   |
| 2        | 6        |             |          |                            | 652.801772 | 1303.589  | 2         |           |         |       | 1303.585754 | 50.08     | WVWDQEEER          | 652.8018  | 654.8143  | 3.84            | 1.44            | 2.67              |
| 2        | 6        |             |          |                            | 652.801772 | 1303.589  | 2         |           |         |       | 1303.585754 | 40.48     | WVWDQEEER          |           |           |                 |                 |                   |
| 2        | 6        |             |          |                            | 461.907434 | 1382.7    | 3         |           |         |       | 1382.700058 | 35.49     | AQETGHLVMDVR       |           |           |                 |                 |                   |
| 2        | 6        |             |          |                            | 461.907434 | 1382.7    | 3         |           |         |       | 1382.700058 | 24.15     | AQETGHLVMDVR       |           |           |                 |                 |                   |
| 2        | 6        |             |          |                            | 692.36007  | 1382.706  | 2         |           |         |       | 1382.700058 | 52.12     | AQETGHLVMDVR       |           |           |                 |                 |                   |
| 2        | 6        |             |          |                            | 692.36007  | 1382.706  | 2         |           |         |       | 1382.700058 | 55.34     | AQETGHLVMDVR       |           |           |                 |                 |                   |
| 2        | 6        |             |          |                            | 697.337711 | 1392.661  | 2         |           |         |       | 1392.654541 | 46.27     | TEEASSGFLPGDR      | 697.3377  | 699.3503  | 17.3            | 7.97            | 2.17              |
| 2        | 6        |             |          |                            | 697.337711 | 1392.661  | 2         |           |         |       | 1392.654541 | 72.09     | TEEASSGFLPGDR      |           |           |                 |                 |                   |
| 2        | 6        |             |          |                            | 467.238847 | 1398.695  | 3         |           |         |       | 1398.694977 | 28.41     | AQETGHLVMDVR       |           |           |                 |                 |                   |
| 2        | 6        |             |          |                            | 467.23887  | 1398.695  | 3         |           |         |       | 1398.694977 | 23.46     | AQETGHLVMDVR       |           |           |                 |                 |                   |
| 2        | 6        |             |          |                            | 700.357387 | 1398.7    | 2         |           |         |       | 1398.694977 | 70.17     | AQETGHLVMDVR       |           |           |                 |                 |                   |
| 2        | 6        |             |          |                            | 700.357387 | 1398.7    | 2         |           |         |       | 1398.694977 | 54.23     | AQETGHLVMDVR       |           |           |                 |                 |                   |
| 2        | 6        |             |          |                            | 766.894753 | 1531.775  | 2         |           |         |       | 1531.786667 | 78.77     | TSTTGVAATQSPTPR    |           |           |                 |                 |                   |
| 2        | 6        |             |          |                            | 766.894753 | 1531.775  | 2         |           |         |       | 1531.786667 | 63.77     | TSTTGVAATQSPTPR    |           |           |                 |                 |                   |
| 2        | 6        |             |          |                            | 622.976636 | 1865.908  | 3         |           |         |       | 1865.896591 | 39.3      | RPPTMTVSEASYQSER   |           |           |                 |                 |                   |
| 2        | 6        |             |          |                            | 628.306019 | 1881.896  | 3         |           |         |       | 1881.89151  | 43.5      | RPPTMTVSEASYQSER   |           |           |                 |                 |                   |
| 2        | 6        |             |          |                            | 628.306019 | 1881.896  | 3         |           |         |       | 1881.89151  | 27.25     | RPPTMTVSEASYQSER   |           |           |                 |                 |                   |
| 2        | 6        | IPI00409590 |          | Isoform 1 of LIM domain or | 522.78376  | 1043.553  | 2         | 3         | 2.09    | 0.61  | 1043.553665 | 20.5      | LREEWQR            |           |           |                 |                 |                   |
| 2        | 6        |             |          |                            | 522.78376  | 1043.553  | 2         |           |         |       | 1043.553665 | 21.82     | LREEWQR            |           |           |                 |                 |                   |
| 2        | 6        |             |          |                            | 621.821086 | 1241.628  | 2         |           |         |       | 1241.627594 | 27.64     | EQVPSGAELER        |           |           |                 |                 |                   |

| Band num | prot_hit_nu | prot_acc    | prot_desc                  | pep_exp_mz | pep_exp_n | pep_exp_z | quantific | average | stdev | pep_calc_mr | pep_score | pep_seq          | light m/z | heavy m/z | light intensity | heavy intensity | ratio light/heavy |
|----------|-------------|-------------|----------------------------|------------|-----------|-----------|-----------|---------|-------|-------------|-----------|------------------|-----------|-----------|-----------------|-----------------|-------------------|
| 2        | 6           |             |                            | 621.821086 | 1241.628  | 2         |           |         |       | 1241.627594 | 34.07     | EQVPSGAELER      |           |           |                 |                 |                   |
| 2        | 6           |             |                            | 652.801772 | 1303.589  | 2         |           |         |       | 1303.585754 | 50.08     | WVWDQEEER        |           |           |                 |                 |                   |
| 2        | 6           |             |                            | 652.801772 | 1303.589  | 2         |           |         |       | 1303.585754 | 40.48     | WVWDQEEER        |           |           |                 |                 |                   |
| 2        | 6           |             |                            | 461.907434 | 1382.7    | 3         |           |         |       | 1382.700058 | 35.49     | AQETGHLVMDVR     |           |           |                 |                 |                   |
| 2        | 6           |             |                            | 461.907434 | 1382.7    | 3         |           |         |       | 1382.700058 | 24.15     | AQETGHLVMDVR     |           |           |                 |                 |                   |
| 2        | 6           |             |                            | 692.36007  | 1382.706  | 2         |           |         |       | 1382.700058 | 52.12     | AQETGHLVMDVR     |           |           |                 |                 |                   |
| 2        | 6           |             |                            | 692.36007  | 1382.706  | 2         |           |         |       | 1382.700058 | 55.34     | AQETGHLVMDVR     |           |           |                 |                 |                   |
| 2        | 6           |             |                            | 697.337711 | 1392.661  | 2         |           |         |       | 1392.654541 | 46.27     | TEEASSGFLPGDR    |           |           |                 |                 |                   |
| 2        | 6           |             |                            | 697.337711 | 1392.661  | 2         |           |         |       | 1392.654541 | 72.09     | TEEASSGFLPGDR    |           |           |                 |                 |                   |
| 2        | 6           |             |                            | 467.238847 | 1398.695  | 3         |           |         |       | 1398.694977 | 28.41     | AQETGHLVMDVR     |           |           |                 |                 |                   |
| 2        | 6           |             |                            | 467.23887  | 1398.695  | 3         |           |         |       | 1398.694977 | 23.46     | AQETGHLVMDVR     |           |           |                 |                 |                   |
| 2        | 6           |             |                            | 700.357387 | 1398.7    | 2         |           |         |       | 1398.694977 | 70.17     | AQETGHLVMDVR     |           |           |                 |                 |                   |
| 2        | 6           |             |                            | 700.357387 | 1398.7    | 2         |           |         |       | 1398.694977 | 54.23     | AQETGHLVMDVR     |           |           |                 |                 |                   |
| 2        | 6           |             |                            | 766.894753 | 1531.775  | 2         |           |         |       | 1531.786667 | 78.77     | TSTTGVATTQSPTPR  |           |           |                 |                 |                   |
| 2        | 6           |             |                            | 766.894753 | 1531.775  | 2         |           |         |       | 1531.786667 | 63.77     | TSTTGVATTQSPTPR  |           |           |                 |                 |                   |
| 2        | 6           |             |                            | 622.976636 | 1865.908  | 3         |           |         |       | 1865.896591 | 39.3      | RPPTMTVSEASYQSER |           |           |                 |                 |                   |
| 2        | 6           |             |                            | 628.306019 | 1881.896  | 3         |           |         |       | 1881.89151  | 43.5      | RPPTMTVSEASYQSER |           |           |                 |                 |                   |
| 2        | 6           |             |                            | 628.306019 | 1881.896  | 3         |           |         |       | 1881.89151  | 27.25     | RPPTMTVSEASYQSER |           |           |                 |                 |                   |
| 2        | 6           | IPI00409591 | Isoform 2 of LIM domain or | 522.78376  | 1043.553  | 2         | 3         | 2.09    | 0.61  | 1043.553665 | 20.5      | LREEWQR          |           |           |                 |                 |                   |
| 2        | 6           |             |                            | 522.78376  | 1043.553  | 2         |           |         |       | 1043.553665 | 21.82     | LREEWQR          |           |           |                 |                 |                   |
| 2        | 6           |             |                            | 621.821086 | 1241.628  | 2         |           |         |       | 1241.627594 | 27.64     | EQVPSGAELER      |           |           |                 |                 |                   |
| 2        | 6           |             |                            | 621.821086 | 1241.628  | 2         |           |         |       | 1241.627594 | 34.07     | EQVPSGAELER      |           |           |                 |                 |                   |
| 2        | 6           |             |                            | 652.801772 | 1303.589  | 2         |           |         |       | 1303.585754 | 50.08     | WVWDQEEER        |           |           |                 |                 |                   |
| 2        | 6           |             |                            | 652.801772 | 1303.589  | 2         |           |         |       | 1303.585754 | 40.48     | WVWDQEEER        |           |           |                 |                 |                   |
| 2        | 6           |             |                            | 461.907434 | 1382.7    | 3         |           |         |       | 1382.700058 | 35.49     | AQETGHLVMDVR     |           |           |                 |                 |                   |
| 2        | 6           |             |                            | 461.907434 | 1382.7    | 3         |           |         |       | 1382.700058 | 24.15     | AQETGHLVMDVR     |           |           |                 |                 |                   |
| 2        | 6           |             |                            | 692.36007  | 1382.706  | 2         |           |         |       | 1382.700058 | 52.12     | AQETGHLVMDVR     |           |           |                 |                 |                   |
| 2        | 6           |             |                            | 692.36007  | 1382.706  | 2         |           |         |       | 1382.700058 | 55.34     | AQETGHLVMDVR     |           |           |                 |                 |                   |
| 2        | 6           |             |                            | 697.337711 | 1392.661  | 2         |           |         |       | 1392.654541 | 46.27     | TEEASSGFLPGDR    |           |           |                 |                 |                   |
| 2        | 6           |             |                            | 697.337711 | 1392.661  | 2         |           |         |       | 1392.654541 | 72.09     | TEEASSGFLPGDR    |           |           |                 |                 |                   |
| 2        | 6           |             |                            | 467.238847 | 1398.695  | 3         |           |         |       | 1398.694977 | 28.41     | AQETGHLVMDVR     |           |           |                 |                 |                   |
| 2        | 6           |             |                            | 467.23887  | 1398.695  | 3         |           |         |       | 1398.694977 | 23.46     | AQETGHLVMDVR     |           |           |                 |                 |                   |
| 2        | 6           |             |                            | 700.357387 | 1398.7    | 2         |           |         |       | 1398.694977 | 70.17     | AQETGHLVMDVR     |           |           |                 |                 |                   |
| 2        | 6           |             |                            | 700.357387 | 1398.7    | 2         |           |         |       | 1398.694977 | 54.23     | AQETGHLVMDVR     |           |           |                 |                 |                   |
| 2        | 6           |             |                            | 766.894753 | 1531.775  | 2         |           |         |       | 1531.786667 | 78.77     | TSTTGVATTQSPTPR  |           |           |                 |                 |                   |
| 2        | 6           |             |                            | 766.894753 | 1531.775  | 2         |           |         |       | 1531.786667 | 63.77     | TSTTGVATTQSPTPR  |           |           |                 |                 |                   |
| 2        | 6           |             |                            | 622.976636 | 1865.908  | 3         |           |         |       | 1865.896591 | 39.3      | RPPTMTVSEASYQSER |           |           |                 |                 |                   |
| 2        | 6           |             |                            | 628.306019 | 1881.896  | 3         |           |         |       | 1881.89151  | 43.5      | RPPTMTVSEASYQSER |           |           |                 |                 |                   |
| 2        | 6           |             |                            | 628.306019 | 1881.896  | 3         |           |         |       | 1881.89151  | 27.25     | RPPTMTVSEASYQSER |           |           |                 |                 |                   |
| 2        | 6           | IPI00409593 | Isoform 4 of LIM domain or | 522.78376  | 1043.553  | 2         | 3         | 2.09    | 0.61  | 1043.553665 | 20.5      | LREEWQR          |           |           |                 |                 |                   |
| 2        | 6           |             |                            | 522.78376  | 1043.553  | 2         |           |         |       | 1043.553665 | 21.82     | LREEWQR          |           |           |                 |                 |                   |
| 2        | 6           |             |                            | 621.821086 | 1241.628  | 2         |           |         |       | 1241.627594 | 27.64     | EQVPSGAELER      |           |           |                 |                 |                   |
| 2        | 6           |             |                            | 621.821086 | 1241.628  | 2         |           |         |       | 1241.627594 | 34.07     | EQVPSGAELER      |           |           |                 |                 |                   |
| 2        | 6           |             |                            | 652.801772 | 1303.589  | 2         |           |         |       | 1303.585754 | 50.08     | WVWDQEEER        |           |           |                 |                 |                   |
| 2        | 6           |             |                            | 652.801772 | 1303.589  | 2         |           |         |       | 1303.585754 | 40.48     | WVWDQEEER        |           |           |                 |                 |                   |
| 2        | 6           |             |                            | 461.907434 | 1382.7    | 3         |           |         |       | 1382.700058 | 35.49     | AQETGHLVMDVR     |           |           |                 |                 |                   |
| 2        | 6           |             |                            | 461.907434 | 1382.7    | 3         |           |         |       | 1382.700058 | 24.15     | AQETGHLVMDVR     |           |           |                 |                 |                   |
| 2        | 6           |             |                            | 692.36007  | 1382.706  | 2         |           |         |       | 1382.700058 | 52.12     | AQETGHLVMDVR     |           |           |                 |                 |                   |
| 2        | 6           |             |                            | 692.36007  | 1382.706  | 2         |           |         |       | 1382.700058 | 55.34     | AQETGHLVMDVR     |           |           |                 |                 |                   |
| 2        | 6           |             |                            | 697.337711 | 1392.661  | 2         |           |         |       | 1392.654541 | 46.27     | TEEASSGFLPGDR    |           |           |                 |                 |                   |
| 2        | 6           |             |                            | 697.337711 | 1392.661  | 2         |           |         |       | 1392.654541 | 72.09     | TEEASSGFLPGDR    |           |           |                 |                 |                   |
| 2        | 6           |             |                            | 467.238847 | 1398.695  | 3         |           |         |       | 1398.694977 | 28.41     | AQETGHLVMDVR     |           |           |                 |                 |                   |
| 2        | 6           |             |                            | 467.23887  | 1398.695  | 3         |           |         |       | 1398.694977 | 23.46     | AQETGHLVMDVR     |           |           |                 |                 |                   |
| 2        | 6           |             |                            | 700.357387 | 1398.7    | 2         |           |         |       | 1398.694977 | 70.17     | AQETGHLVMDVR     |           |           |                 |                 |                   |
| 2        | 6           |             |                            | 700.357387 | 1398.7    | 2         |           |         |       | 1398.694977 | 54.23     | AQETGHLVMDVR     |           |           |                 |                 |                   |
| 2        | 6           |             |                            | 766.894753 | 1531.775  | 2         |           |         |       | 1531.786667 | 78.77     | TSTTGVATTQSPTPR  |           |           |                 |                 |                   |
| 2        | 6           |             |                            | 766.894753 | 1531.775  | 2         |           |         |       | 1531.786667 | 63.77     | TSTTGVATTQSPTPR  |           |           |                 |                 |                   |
| 2        | 6           |             |                            | 622.976636 | 1865.908  | 3         |           |         |       | 1865.896591 | 39.3      | RPPTMTVSEASYQSER |           |           |                 |                 |                   |
| 2        | 6           |             |                            | 628.306019 | 1881.896  | 3         |           |         |       | 1881.89151  | 43.5      | RPPTMTVSEASYQSER |           |           |                 |                 |                   |
| 2        | 6           |             |                            | 628.306019 | 1881.896  | 3         |           |         |       | 1881.89151  | 27.25     | RPPTMTVSEASYQSER |           |           |                 |                 |                   |
| 2        | 7           | IPI00028931 | Desmoglein 2               | 551.809829 | 1101.605  | 2         | 5         | 4.03    | 1.74  | 1101.605423 | 29.7      | VTQEIVTER        | 551.8099  | 553.8224  | 7.12            | 1.93            | 3.69              |
| 2        | 7           |             |                            | 551.809845 | 1101.605  | 2         |           |         |       | 1101.605423 | 31.17     | VTQEIVTER        |           |           |                 |                 |                   |
| 2        | 7           |             |                            | 573.814903 | 1145.615  | 2         |           |         |       | 1145.613876 | 28.27     | TAAEVLGQK        | 573.8149  | 575.8275  | 9.63            | 5.09            | 1.89              |

| Band num | prot_hit_nu | prot_acc    | prot_desc                   | pep_exp_mz | pep_exp_n | pep_exp_z | quantific | average | stdev | pep_calc_mr | pep_score | pep_seq          | light m/z | heavy m/z | light intensity | heavy intensity | ratio light/heavy |
|----------|-------------|-------------|-----------------------------|------------|-----------|-----------|-----------|---------|-------|-------------|-----------|------------------|-----------|-----------|-----------------|-----------------|-------------------|
| 2        | 7           |             |                             | 595.825552 | 1189.637  | 2         |           |         |       | 1189.636719 | 44.58     | IWAISEDYPR       | 595.8256  | 597.8381  | 10.4            | 1.77            | 5.88              |
| 2        | 7           |             |                             | 595.825552 | 1189.637  | 2         |           |         |       | 1189.636719 | 58.89     | IWAISEDYPR       |           |           |                 |                 |                   |
| 2        | 7           |             |                             | 595.825583 | 1189.637  | 2         |           |         |       | 1189.636719 | 56.12     | IWAISEDYPR       |           |           |                 |                 |                   |
| 2        | 7           |             |                             | 641.848346 | 1281.682  | 2         |           |         |       | 1281.677551 | 21.01     | VATPLPDPMASR     | 641.8484  | 643.8609  | 26.1            | 8.8             | 2.97              |
| 2        | 7           |             |                             | 805.445276 | 1608.876  | 2         |           |         |       | 1608.874695 | 40.13     | ILDVNDNIPVVENK   |           |           |                 |                 |                   |
| 2        | 7           |             |                             | 805.445276 | 1608.876  | 2         |           |         |       | 1608.874695 | 84.82     | ILDVNDNIPVVENK   |           |           |                 |                 |                   |
| 2        | 7           |             |                             | 805.445276 | 1608.876  | 2         |           |         |       | 1608.874695 | 50.05     | ILDVNDNIPVVENK   |           |           |                 |                 |                   |
| 2        | 7           |             |                             | 819.462025 | 1636.909  | 2         |           |         |       | 1636.906006 | 35.74     | ILDVNDNIPVVENK   | 819.462   | 823.4871  | 16.7            | 2.91            | 5.74              |
| 2        | 7           |             |                             | 819.462025 | 1636.909  | 2         |           |         |       | 1636.906006 | 85.79     | ILDVNDNIPVVENK   |           |           |                 |                 |                   |
| 2        | 7           |             |                             | 995.005005 | 1987.995  | 2         |           |         |       | 1987.990829 | 87.69     | VLEGMVEENQVNVVTR |           |           |                 |                 |                   |
| 2        | 7           |             |                             | 995.005005 | 1987.995  | 2         |           |         |       | 1987.990829 | 48.02     | VLEGMVEENQVNVVTR |           |           |                 |                 |                   |
| 2        | 8           | IPI00167909 | echinoderm microtubule as   | 438.769333 | 875.5241  | 2         | 4         | 1.62    | 0.17  | 875.525314  | 40.72     | SNLFVLR          | 438.7693  | 440.7819  | 6.61            | 4.02            | 1.64              |
| 2        | 8           |             |                             | 530.294787 | 1058.575  | 2         |           |         |       | 1058.574463 | 52.71     | EALQSLSOR        | 530.2948  | 532.3073  | 6.27            | 4.48            | 1.40              |
| 2        | 8           |             |                             | 576.293931 | 1150.573  | 2         |           |         |       | 1150.571671 | 42.28     | VVAVADDFCK       | 576.2939  | 578.3065  | 2.24            | 1.39            | 1.61              |
| 2        | 8           |             |                             | 576.304338 | 1150.594  | 2         |           |         |       | 1150.594147 | 47.73     | CLAVHPDGVR       |           |           |                 |                 |                   |
| 2        | 8           |             |                             | 576.304338 | 1150.594  | 2         |           |         |       | 1150.594147 | 50.68     | CLAVHPDGVR       |           |           |                 |                 |                   |
| 2        | 8           |             |                             | 590.309294 | 1178.604  | 2         |           |         |       | 1178.602982 | 37.15     | VVAVADDFCK       |           |           |                 |                 |                   |
| 2        | 8           |             |                             | 703.893855 | 1405.773  | 2         |           |         |       | 1405.770157 | 84.79     | VLGAGGAGPAPATPSR | 703.8939  | 705.9064  | 14.6            | 8               | 1.83              |
| 2        | 8           |             |                             | 703.894025 | 1405.773  | 2         |           |         |       | 1405.770157 | 84.72     | VLGAGGAGPAPATPSR |           |           |                 |                 |                   |
| 2        | 8           |             |                             | 354.676619 | 1414.677  | 4         |           |         |       | 1414.679977 | 27.68     | MYGGHSHVTSVR     |           |           |                 |                 |                   |
| 2        | 8           |             |                             | 472.566983 | 1414.679  | 3         |           |         |       | 1414.679977 | 25.23     | MYGGHSHVTSVR     |           |           |                 |                 |                   |
| 2        | 8           |             |                             | 752.897548 | 1503.781  | 2         |           |         |       | 1503.770569 | 74.58     | STNDSVLAVGFNPR   |           |           |                 |                 |                   |
| 2        | 9           | IPI00012837 | Kinesin heavy chain         | 475.277551 | 948.5406  | 2         | 4         | 2.09    | 0.74  | 948.541702  | 44.42     | STLLFGQR         | 475.2776  | 477.2901  | 3.04            | 1.83            | 1.66              |
| 2        | 9           |             |                             | 475.277551 | 948.5406  | 2         |           |         |       | 948.541702  | 36.18     | STLLFGQR         |           |           |                 |                 |                   |
| 2        | 9           |             |                             | 384.557083 | 1150.649  | 3         |           |         |       | 1150.6483   | 30.42     | ELQTLHNL         |           |           |                 |                 |                   |
| 2        | 9           |             |                             | 384.557083 | 1150.649  | 3         |           |         |       | 1150.6483   | 27.94     | ELQTLHNL         |           |           |                 |                 |                   |
| 2        | 9           |             |                             | 630.823644 | 1259.633  | 2         |           |         |       | 1259.631653 | 25.33     | ILQDSLGGNCR      | 630.8236  | 632.8362  | 3.18            | 2.48            | 1.28              |
| 2        | 9           |             |                             | 630.823644 | 1259.633  | 2         |           |         |       | 1259.631653 | 40.01     | ILQDSLGGNCR      |           |           |                 |                 |                   |
| 2        | 9           |             |                             | 687.882066 | 1373.75   | 2         |           |         |       | 1373.742645 | 38.64     | SATLASIDAELQK    |           |           |                 |                 |                   |
| 2        | 9           |             |                             | 503.908557 | 1508.704  | 3         |           |         |       | 1508.717834 | 54.98     | HVAVTNMNEHSSR    |           |           |                 |                 |                   |
| 2        | 9           |             |                             | 503.908557 | 1508.704  | 3         |           |         |       | 1508.717834 | 59.73     | HVAVTNMNEHSSR    |           |           |                 |                 |                   |
| 2        | 9           |             |                             | 839.923219 | 1677.832  | 2         |           |         |       | 1677.826797 | 42.28     | TQMLDQEELLA      | 839.9232  | 841.9358  | 9.26            | 3.62            | 2.56              |
| 2        | 9           |             |                             | 839.923219 | 1677.832  | 2         |           |         |       | 1677.826797 | 67.89     | TQMLDQEELLA      |           |           |                 |                 |                   |
| 2        | 9           |             |                             | 839.923219 | 1677.832  | 2         |           |         |       | 1677.826797 | 79.93     | TQMLDQEELLA      |           |           |                 |                 |                   |
| 2        | 9           |             |                             | 912.42993  | 1822.845  | 2         |           |         |       | 1822.84314  | 37.85     | QPEGTGMIDEEFTVAR | 912.4299  | 814.4425  | 9.3             | 3.25            | 2.86              |
| 2        | 9           |             |                             | 912.42993  | 1822.845  | 2         |           |         |       | 1822.84314  | 26.99     | QPEGTGMIDEEFTVAR |           |           |                 |                 |                   |
| 2        | 9           | IPI00472558 | 110 kDa protein             | 475.277551 | 948.5406  | 2         | 4         | 2.09    | 0.74  | 948.541702  | 44.42     | STLLFGQR         |           |           |                 |                 |                   |
| 2        | 9           |             |                             | 475.277551 | 948.5406  | 2         |           |         |       | 948.541702  | 36.18     | STLLFGQR         |           |           |                 |                 |                   |
| 2        | 9           |             |                             | 384.557083 | 1150.649  | 3         |           |         |       | 1150.6483   | 30.42     | ELQTLHNL         |           |           |                 |                 |                   |
| 2        | 9           |             |                             | 384.557083 | 1150.649  | 3         |           |         |       | 1150.6483   | 27.94     | ELQTLHNL         |           |           |                 |                 |                   |
| 2        | 9           |             |                             | 630.823644 | 1259.633  | 2         |           |         |       | 1259.631653 | 25.33     | ILQDSLGGNCR      |           |           |                 |                 |                   |
| 2        | 9           |             |                             | 630.823644 | 1259.633  | 2         |           |         |       | 1259.631653 | 40.01     | ILQDSLGGNCR      |           |           |                 |                 |                   |
| 2        | 9           |             |                             | 687.882066 | 1373.75   | 2         |           |         |       | 1373.742645 | 38.64     | SATLASIDAELQK    |           |           |                 |                 |                   |
| 2        | 9           |             |                             | 503.908557 | 1508.704  | 3         |           |         |       | 1508.717834 | 54.98     | HVAVTNMNEHSSR    |           |           |                 |                 |                   |
| 2        | 9           |             |                             | 503.908557 | 1508.704  | 3         |           |         |       | 1508.717834 | 59.73     | HVAVTNMNEHSSR    |           |           |                 |                 |                   |
| 2        | 9           |             |                             | 839.923219 | 1677.832  | 2         |           |         |       | 1677.826797 | 42.28     | TQMLDQEELLA      |           |           |                 |                 |                   |
| 2        | 9           |             |                             | 839.923219 | 1677.832  | 2         |           |         |       | 1677.826797 | 67.89     | TQMLDQEELLA      |           |           |                 |                 |                   |
| 2        | 9           |             |                             | 839.923219 | 1677.832  | 2         |           |         |       | 1677.826797 | 79.93     | TQMLDQEELLA      |           |           |                 |                 |                   |
| 2        | 9           |             |                             | 912.42993  | 1822.845  | 2         |           |         |       | 1822.84314  | 37.85     | QPEGTGMIDEEFTVAR |           |           |                 |                 |                   |
| 2        | 9           |             |                             | 912.42993  | 1822.845  | 2         |           |         |       | 1822.84314  | 26.99     | QPEGTGMIDEEFTVAR |           |           |                 |                 |                   |
| 2        | 10          | IPI00383581 | Isoform 1 of Neutral alpha- | 364.227594 | 726.4406  | 2         | 5         | 3.49    | 1.36  | 726.441254  | 33.44     | GGTIVPR          | 364.2277  | 366.2402  | 8.28            | 1.38            | 6.00              |
| 2        | 10          |             |                             | 364.227686 | 726.4408  | 2         |           |         |       | 726.441254  | 46.55     | GGTIVPR          |           |           |                 |                 |                   |
| 2        | 10          |             |                             | 417.248376 | 832.4822  | 2         |           |         |       | 832.483124  | 26.66     | QEFLLR           | 417.2484  | 419.2609  | 18.7            | 5.57            | 3.36              |
| 2        | 10          |             |                             | 417.248376 | 832.4822  | 2         |           |         |       | 832.483124  | 30.02     | QEFLLR           |           |           |                 |                 |                   |
| 2        | 10          |             |                             | 451.253697 | 900.4928  | 2         |           |         |       | 900.494095  | 37.17     | LDLLEDR          | 451.2537  | 453.2663  | 2.48            | 1.13            | 2.19              |
| 2        | 10          |             |                             | 451.253697 | 900.4928  | 2         |           |         |       | 900.494095  | 43.39     | LDLLEDR          |           |           |                 |                 |                   |
| 2        | 10          |             |                             | 456.241088 | 910.4676  | 2         |           |         |       | 910.468521  | 38.85     | AFFAGSQR         |           |           |                 |                 |                   |
| 2        | 10          |             |                             | 456.241088 | 910.4676  | 2         |           |         |       | 910.468521  | 29.75     | AFFAGSQR         |           |           |                 |                 |                   |
| 2        | 10          |             |                             | 456.241088 | 910.4676  | 2         |           |         |       | 910.468521  | 41.57     | AFFAGSQR         |           |           |                 |                 |                   |
| 2        | 10          |             |                             | 500.811172 | 999.6078  | 2         |           |         |       | 999.610107  | 43.55     | SLLLSVNR         | 500.8112  | 502.8237  | 12.9            | 5.08            | 2.54              |
| 2        | 10          |             |                             | 500.811172 | 999.6078  | 2         |           |         |       | 999.610107  | 39.37     | SLLLSVNR         |           |           |                 |                 |                   |
| 2        | 10          |             |                             | 547.814191 | 1093.614  | 2         |           |         |       | 1093.615585 | 23.81     | NPEPELLVR        | 547.8142  | 549.8268  | 21.6            | 5.69            | 3.80              |
| 2        | 10          |             |                             | 550.26493  | 1098.515  | 2         |           |         |       | 1098.5159   | 28.5      | YFTWDPSR         |           |           |                 |                 |                   |

| Band num | prot_hit | nu_prot_acc | prot_desc                   | pep_exp_mz | pep_exp_n  | pep_exp_z | quantific | average | stdev | pep_calc_mr | pep_score   | pep_seq                | light m/z              | heavy m/z | light intensity | heavy intensity | ratio light/heavy |      |
|----------|----------|-------------|-----------------------------|------------|------------|-----------|-----------|---------|-------|-------------|-------------|------------------------|------------------------|-----------|-----------------|-----------------|-------------------|------|
| 2        | 10       |             | 107 kDa protein             | 578.80967  | 1155.605   | 2         |           |         |       | 1155.606079 | 62.29       | GLLEFEHQR              |                        |           |                 |                 |                   |      |
| 2        | 10       |             |                             | 578.80967  | 1155.605   | 2         |           |         |       | 1155.606079 | 61.94       | GLLEFEHQR              |                        |           |                 |                 |                   |      |
| 2        | 10       |             |                             |            | 578.810111 | 1155.606  | 2         |         |       |             | 1155.606079 | 46.8                   | GLLEFEHQR              |           |                 |                 |                   |      |
| 2        | 10       |             |                             |            | 386.209485 | 1155.607  | 3         |         |       |             | 1155.606079 | 26.63                  | GLLEFEHQR              |           |                 |                 |                   |      |
| 2        | 10       |             |                             |            | 386.209486 | 1155.607  | 3         |         |       |             | 1155.606079 | 27.33                  | GLLEFEHQR              |           |                 |                 |                   |      |
| 2        | 10       |             |                             |            | 391.897555 | 1172.671  | 3         |         |       |             | 1172.669022 | 32.38                  | SIRPGLSPYR             | 391.8976  | 393.2393        | 20.6            | 6.8               | 3.03 |
| 2        | 10       |             |                             |            | 391.897555 | 1172.671  | 3         |         |       |             | 1172.669022 | 35.63                  | SIRPGLSPYR             |           |                 |                 |                   |      |
| 2        | 10       |             |                             |            | 391.897564 | 1172.671  | 3         |         |       |             | 1172.669022 | 28.97                  | SIRPGLSPYR             |           |                 |                 |                   |      |
| 2        | 10       |             |                             |            | 728.347826 | 2182.022  | 3         |         |       |             | 2182.01622  | 27.38                  | VSQGSKDPAEAGDGAQPEETPR |           |                 |                 |                   |      |
| 2        | 10       |             |                             |            | 737.695969 | 2210.066  | 3         |         |       |             | 2210.047531 | 48.92                  | VSQGSKDPAEAGDGAQPEETPR |           |                 |                 |                   |      |
| 2        | 10       |             |                             |            | 737.695969 | 2210.066  | 3         |         |       |             | 2210.047531 | 33.78                  | VSQGSKDPAEAGDGAQPEETPR |           |                 |                 |                   |      |
| 2        | 10       | IPI00472068 |                             |            | 364.227594 | 726.4406  | 2         | 5       | 3.49  | 1.36        | 726.441254  | 33.44                  | GGTIVPR                |           |                 |                 |                   |      |
| 2        | 10       |             |                             |            | 364.227686 | 726.4408  | 2         |         |       |             | 726.441254  | 46.55                  | GGTIVPR                |           |                 |                 |                   |      |
| 2        | 10       |             |                             |            | 417.248376 | 832.4822  | 2         |         |       |             | 832.483124  | 26.66                  | QEFLLR                 |           |                 |                 |                   |      |
| 2        | 10       |             |                             |            | 417.248376 | 832.4822  | 2         |         |       |             | 832.483124  | 30.02                  | QEFLLR                 |           |                 |                 |                   |      |
| 2        | 10       |             |                             |            | 451.253697 | 900.4928  | 2         |         |       |             | 900.494095  | 37.17                  | LDLLEDR                |           |                 |                 |                   |      |
| 2        | 10       |             |                             |            | 451.253697 | 900.4928  | 2         |         |       |             | 900.494095  | 43.39                  | LDLLEDR                |           |                 |                 |                   |      |
| 2        | 10       |             |                             |            | 456.241088 | 910.4676  | 2         |         |       |             | 910.468521  | 38.85                  | AFFAGSQR               |           |                 |                 |                   |      |
| 2        | 10       |             |                             |            | 456.241088 | 910.4676  | 2         |         |       |             | 910.468521  | 29.75                  | AFFAGSQR               |           |                 |                 |                   |      |
| 2        | 10       |             |                             |            | 456.241088 | 910.4676  | 2         |         |       |             | 910.468521  | 41.57                  | AFFAGSQR               |           |                 |                 |                   |      |
| 2        | 10       |             |                             | 500.811172 | 999.6078   | 2         |           |         |       | 999.610107  | 43.55       | SLLLSVNR               |                        |           |                 |                 |                   |      |
| 2        | 10       |             |                             | 500.811172 | 999.6078   | 2         |           |         |       | 999.610107  | 39.37       | SLLLSVNR               |                        |           |                 |                 |                   |      |
| 2        | 10       |             |                             | 547.814191 | 1093.614   | 2         |           |         |       | 1093.615585 | 23.81       | NPEPELLVR              |                        |           |                 |                 |                   |      |
| 2        | 10       |             |                             | 550.26493  | 1098.515   | 2         |           |         |       | 1098.5159   | 28.5        | YFTWDPSR               |                        |           |                 |                 |                   |      |
| 2        | 10       |             |                             | 578.80967  | 1155.605   | 2         |           |         |       | 1155.606079 | 62.29       | GLLEFEHQR              |                        |           |                 |                 |                   |      |
| 2        | 10       |             |                             | 578.80967  | 1155.605   | 2         |           |         |       | 1155.606079 | 61.94       | GLLEFEHQR              |                        |           |                 |                 |                   |      |
| 2        | 10       |             |                             | 578.810111 | 1155.606   | 2         |           |         |       | 1155.606079 | 46.8        | GLLEFEHQR              |                        |           |                 |                 |                   |      |
| 2        | 10       |             |                             | 386.209485 | 1155.607   | 3         |           |         |       | 1155.606079 | 26.63       | GLLEFEHQR              |                        |           |                 |                 |                   |      |
| 2        | 10       |             |                             | 386.209486 | 1155.607   | 3         |           |         |       | 1155.606079 | 27.33       | GLLEFEHQR              |                        |           |                 |                 |                   |      |
| 2        | 10       |             |                             | 391.897555 | 1172.671   | 3         |           |         |       | 1172.669022 | 32.38       | SIRPGLSPYR             |                        |           |                 |                 |                   |      |
| 2        | 10       |             |                             | 391.897555 | 1172.671   | 3         |           |         |       | 1172.669022 | 35.63       | SIRPGLSPYR             |                        |           |                 |                 |                   |      |
| 2        | 10       |             |                             | 391.897564 | 1172.671   | 3         |           |         |       | 1172.669022 | 28.97       | SIRPGLSPYR             |                        |           |                 |                 |                   |      |
| 2        | 10       |             |                             | 728.347826 | 2182.022   | 3         |           |         |       | 2182.01622  | 27.38       | VSQGSKDPAEAGDGAQPEETPR |                        |           |                 |                 |                   |      |
| 2        | 10       |             |                             | 737.695969 | 2210.066   | 3         |           |         |       | 2210.047531 | 48.92       | VSQGSKDPAEAGDGAQPEETPR |                        |           |                 |                 |                   |      |
| 2        | 10       |             |                             | 737.695969 | 2210.066   | 3         |           |         |       | 2210.047531 | 33.78       | VSQGSKDPAEAGDGAQPEETPR |                        |           |                 |                 |                   |      |
| 2        | 11       | IPI00645078 | Ubiquitin-activating enzyme | 639.803168 | 1277.592   | 2         | 4         | 2.68    | 1.04  | 1277.591232 | 32.64       | AENYDIPSADR            | 639.8032               | 641.8157  | 3.2             | 1.02            | 3.14              |      |
| 2        | 11       |             |                             |            | 639.803168 | 1277.592  | 2         |         |       |             | 1277.591232 | 43.81                  | AENYDIPSADR            |           |                 |                 |                   |      |
| 2        | 11       |             |                             |            | 644.387009 | 1286.759  | 2         |         |       |             | 1286.758224 | 45.14                  | LQTSSVLVSGLR           | 644.387   | 646.3996        | 13.6            | 3.99              | 3.41 |
| 2        | 11       |             |                             |            | 644.387009 | 1286.759  | 2         |         |       |             | 1286.758224 | 58.82                  | LQTSSVLVSGLR           |           |                 |                 |                   |      |
| 2        | 11       |             |                             |            | 644.387105 | 1286.76   | 2         |         |       |             | 1286.758224 | 50.38                  | LQTSSVLVSGLR           |           |                 |                 |                   |      |
| 2        | 11       |             |                             |            | 658.852429 | 1315.69   | 2         |         |       |             | 1315.683029 | 45.16                  | LDQPMTEIVSR            |           |                 |                 |                   |      |
| 2        | 11       |             |                             |            | 658.852429 | 1315.69   | 2         |         |       |             | 1315.683029 | 48.72                  | LDQPMTEIVSR            |           |                 |                 |                   |      |
| 2        | 11       |             |                             |            | 666.849397 | 1331.684  | 2         |         |       |             | 1331.677948 | 34.53                  | LDQPMTEIVSR            |           |                 |                 |                   |      |
| 2        | 11       |             |                             |            | 737.358208 | 1472.702  | 2         |         |       |             | 1472.695374 | 54.7                   | DNPGVVTCLEAR           | 737.2582  | 739.3708        | 20.3            | 13.6              | 1.49 |
| 2        | 11       |             |                             |            | 822.918325 | 1643.822  | 2         |         |       |             | 1643.817932 | 34.18                  | QPAENVNQYLTPDK         |           |                 |                 |                   |      |
| 2        | 11       |             |                             |            | 822.918325 | 1643.822  | 2         |         |       |             | 1643.817932 | 32.2                   | QPAENVNQYLTPDK         |           |                 |                 |                   |      |
| 2        | 11       |             |                             |            | 822.918325 | 1643.822  | 2         |         |       |             | 1643.817932 | 65.22                  | QPAENVNQYLTPDK         |           |                 |                 |                   |      |
| 2        | 11       |             |                             |            | 836.934633 | 1671.855  | 2         |         |       |             | 1671.849243 | 33.1                   | QPAENVNQYLTPDK         |           |                 |                 |                   |      |
| 2        | 11       |             |                             |            | 700.337994 | 2097.992  | 3         |         |       |             | 2097.995117 | 34.37                  | IHVSDQELQSANASVDDSR    |           |                 |                 |                   |      |
| 2        | 12       | IPI00022744 | Isoform 1 of Exportin-2     | 509.307546 | 1016.601   | 2         | 1         | 4.11    | 0.00  | 1016.604294 | 23.84       | LLQAFLE                |                        |           |                 |                 |                   |      |
| 2        | 12       |             |                             |            | 958.419316 | 1914.824  | 2         |         |       |             | 1914.814331 | 91.61                  | AADEEAFEDNSEEYIR       | 958.4193  | 960.4319        | 12.2            | 2.97              | 4.11 |
| 2        | 12       |             |                             |            | 958.419316 | 1914.824  | 2         |         |       |             | 1914.814331 | 81.25                  | AADEEAFEDNSEEYIR       |           |                 |                 |                   |      |
| 2        | 12       |             |                             |            | 958.419316 | 1914.824  | 2         |         |       |             | 1914.814331 | 92.35                  | AADEEAFEDNSEEYIR       |           |                 |                 |                   |      |
| 2        | 12       | IPI00219994 | Isoform 3 of Exportin-2     | 509.307546 | 1016.601   | 2         | 1         | 4.11    | 0.00  | 1016.604294 | 23.84       | LLQAFLE                |                        |           |                 |                 |                   |      |
| 2        | 12       |             |                             |            | 958.419316 | 1914.824  | 2         |         |       |             | 1914.814331 | 91.61                  | AADEEAFEDNSEEYIR       |           |                 |                 |                   |      |
| 2        | 12       |             |                             |            | 958.419316 | 1914.824  | 2         |         |       |             | 1914.814331 | 81.25                  | AADEEAFEDNSEEYIR       |           |                 |                 |                   |      |
| 2        | 12       |             |                             |            | 958.419316 | 1914.824  | 2         |         |       |             | 1914.814331 | 92.35                  | AADEEAFEDNSEEYIR       |           |                 |                 |                   |      |
| 2        | 13       | IPI00024067 | clathrin heavy chain 1      | 577.814614 | 1153.615   | 2         | 3         | 4.03    | 0.10  | 1153.61557  | 34.12       | VANVELYYR              |                        |           |                 |                 |                   |      |
| 2        | 13       |             |                             |            | 577.814614 | 1153.615  | 2         |         |       |             | 1153.61557  | 36.63                  | VANVELYYR              |           |                 |                 |                   |      |
| 2        | 13       |             |                             |            | 662.853749 | 1323.693  | 2         |         |       |             | 1323.695938 | 33.29                  | LLYNNVSNFGR            | 662.8538  | 664.8666        | 4.63            | 1.12              | 4.13 |
| 2        | 13       |             |                             |            | 681.838817 | 1361.663  | 2         |         |       |             | 1361.659973 | 38.62                  | IYDSNNNPER             | 681.839   | 683.8515        | 29.6            | 7.34              | 4.03 |
| 2        | 13       |             |                             |            | 681.838988 | 1361.663  | 2         |         |       |             | 1361.659973 | 40.76                  | IYDSNNNPER             |           |                 |                 |                   |      |
| 2        | 13       |             |                             |            | 683.366445 | 1364.718  | 2         |         |       |             | 1364.71463  | 52.05                  | VVGAMQLYSVDR           |           |                 |                 |                   |      |

| Band num | prot_hit | nu          | prot_acc | prot_desc                   | pep_exp_mz | pep_exp_n | pep_exp_z | quantific | average | stdev | pep_calc_mr | pep_score | pep_seq                | light m/z | heavy m/z | light intensity | heavy intensity | ratio light/heavy |
|----------|----------|-------------|----------|-----------------------------|------------|-----------|-----------|-----------|---------|-------|-------------|-----------|------------------------|-----------|-----------|-----------------|-----------------|-------------------|
| 2        | 13       |             |          |                             | 683.366445 | 1364.718  | 2         |           |         |       | 1364.71463  | 49.43     | VVGAMQLYSVDR           |           |           |                 |                 |                   |
| 2        | 13       |             |          |                             | 691.36457  | 1380.715  | 2         |           |         |       | 1380.709549 | 58.51     | VVGAMQLYSVDR           | 691.3646  | 693.3771  | 31.9            | 8.11            | 3.93              |
| 2        | 13       |             |          |                             | 691.36457  | 1380.715  | 2         |           |         |       | 1380.709549 | 60.18     | VVGAMQLYSVDR           |           |           |                 |                 |                   |
| 2        | 13       |             |          |                             | 481.924933 | 1442.753  | 3         |           |         |       | 1442.754196 | 36.75     | IVLDNSVFSEHR           |           |           |                 |                 |                   |
| 2        | 13       |             |          |                             | 481.924933 | 1442.753  | 3         |           |         |       | 1442.754196 | 24.67     | IVLDNSVFSEHR           |           |           |                 |                 |                   |
| 2        | 13       | IPI00455383 |          | Isoform 2 of Clathrin heavy | 577.814614 | 1153.615  | 2         | 3         | 4.03    | 0.10  | 1153.61557  | 34.12     | VANVELYYR              |           |           |                 |                 |                   |
| 2        | 13       |             |          |                             | 577.814614 | 1153.615  | 2         |           |         |       | 1153.61557  | 36.63     | VANVELYYR              |           |           |                 |                 |                   |
| 2        | 13       |             |          |                             | 662.853749 | 1323.693  | 2         |           |         |       | 1323.695938 | 33.29     | LLYNNVSNFGR            |           |           |                 |                 |                   |
| 2        | 13       |             |          |                             | 681.838817 | 1361.663  | 2         |           |         |       | 1361.659973 | 38.62     | IYIDSNNNPER            |           |           |                 |                 |                   |
| 2        | 13       |             |          |                             | 681.838817 | 1361.663  | 2         |           |         |       | 1361.659973 | 40.76     | IYIDSNNNPER            |           |           |                 |                 |                   |
| 2        | 13       |             |          |                             | 683.366445 | 1364.718  | 2         |           |         |       | 1364.71463  | 52.05     | VVGAMQLYSVDR           |           |           |                 |                 |                   |
| 2        | 13       |             |          |                             | 683.366445 | 1364.718  | 2         |           |         |       | 1364.71463  | 49.43     | VVGAMQLYSVDR           |           |           |                 |                 |                   |
| 2        | 13       |             |          |                             | 691.36457  | 1380.715  | 2         |           |         |       | 1380.709549 | 58.51     | VVGAMQLYSVDR           |           |           |                 |                 |                   |
| 2        | 13       |             |          |                             | 691.36457  | 1380.715  | 2         |           |         |       | 1380.709549 | 60.18     | VVGAMQLYSVDR           |           |           |                 |                 |                   |
| 2        | 13       |             |          |                             | 481.924933 | 1442.753  | 3         |           |         |       | 1442.754196 | 36.75     | IVLDNSVFSEHR           |           |           |                 |                 |                   |
| 2        | 13       |             |          |                             | 481.924933 | 1442.753  | 3         |           |         |       | 1442.754196 | 24.67     | IVLDNSVFSEHR           |           |           |                 |                 |                   |
| 2        | 14       | IPI00022462 |          | Transferrin receptor prot   | 616.836996 | 1231.659  | 2         | 3         | 2.60    | 1.03  | 1231.658508 | 45.79     | LLNENSVVPR             | 616.837   | 618.8496  | 6.91            | 1.93            | 3.58              |
| 2        | 14       |             |          |                             | 616.836996 | 1231.659  | 2         |           |         |       | 1231.658508 | 44.96     | LLNENSVVPR             |           |           |                 |                 |                   |
| 2        | 14       |             |          |                             | 548.94657  | 1643.818  | 3         |           |         |       | 1643.817932 | 38.98     | LTHDVELNLDYER          |           |           |                 |                 |                   |
| 2        | 14       |             |          |                             | 548.946838 | 1643.819  | 3         |           |         |       | 1643.817932 | 27.85     | LTHDVELNLDYER          |           |           |                 |                 |                   |
| 2        | 14       |             |          |                             | 822.918965 | 1643.823  | 2         |           |         |       | 1643.817932 | 45.27     | LTHDVELNLDYER          | 822.919   | 824.9315  | 10.6            | 6.97            | 1.52              |
| 2        | 14       |             |          |                             | 822.918965 | 1643.823  | 2         |           |         |       | 1643.817932 | 57.32     | LTHDVELNLDYER          |           |           |                 |                 |                   |
| 2        | 14       |             |          |                             | 567.63125  | 1699.872  | 3         |           |         |       | 1699.87059  | 54.07     | GFVEPDHYVVVGAQR        | 567.6313  | 568.973   | 5.72            | 2.13            | 2.69              |
| 2        | 14       |             |          |                             | 567.63125  | 1699.872  | 3         |           |         |       | 1699.87059  | 58.28     | GFVEPDHYVVVGAQR        |           |           |                 |                 |                   |
| 2        | 15       | IPI00027442 |          | Alanyl-tRNA synthetase, c   | 555.291341 | 1108.568  | 2         | 4         | 2.49    | 0.50  | 1108.562027 | 20.13     | KCLSVMEAK              |           |           |                 |                 |                   |
| 2        | 15       |             |          |                             | 718.859829 | 1435.705  | 2         |           |         |       | 1435.700775 | 42.88     | AVFDETYDPVPR           | 718.8598  | 720.8724  | 23.2            | 7.67            | 3.02              |
| 2        | 15       |             |          |                             | 755.851042 | 1509.688  | 2         |           |         |       | 1509.679367 | 27.01     | VGAEDADGIDMAYR         | 755.851   | 757.8636  | 12              | 5.05            | 2.57              |
| 2        | 15       |             |          |                             | 836.921589 | 1671.829  | 2         |           |         |       | 1671.820938 | 65.73     | ITCLCQVPQNAANR         | 836.9216  | 838.9341  | 13.4            | 6.83            | 1.82              |
| 2        | 15       |             |          |                             | 836.921589 | 1671.829  | 2         |           |         |       | 1671.820938 | 71.44     | ITCLCQVPQNAANR         |           |           |                 |                 |                   |
| 2        | 15       |             |          |                             | 581.312557 | 1740.916  | 3         |           |         |       | 1740.914276 | 34.24     | TITVALADGGRPDNTGR      | 581.3126  | 582.6543  | 3.25            | 1.28            | 2.54              |
| 2        | 15       |             |          |                             | 581.312557 | 1740.916  | 3         |           |         |       | 1740.914276 | 33.7      | TITVALADGGRPDNTGR      |           |           |                 |                 |                   |
| 2        | 15       | IPI00784131 |          | 107 kDa protein             | 555.291341 | 1108.568  | 2         | 4         | 2.49    | 0.50  | 1108.562027 | 20.13     | KCLSVMEAK              |           |           |                 |                 |                   |
| 2        | 15       |             |          |                             | 718.859829 | 1435.705  | 2         |           |         |       | 1435.700775 | 42.88     | AVFDETYDPVPR           |           |           |                 |                 |                   |
| 2        | 15       |             |          |                             | 755.851042 | 1509.688  | 2         |           |         |       | 1509.679367 | 27.01     | VGAEDADGIDMAYR         |           |           |                 |                 |                   |
| 2        | 15       |             |          |                             | 836.921589 | 1671.829  | 2         |           |         |       | 1671.820938 | 65.73     | ITCLCQVPQNAANR         |           |           |                 |                 |                   |
| 2        | 15       |             |          |                             | 836.921589 | 1671.829  | 2         |           |         |       | 1671.820938 | 71.44     | ITCLCQVPQNAANR         |           |           |                 |                 |                   |
| 2        | 15       |             |          |                             | 581.312557 | 1740.916  | 3         |           |         |       | 1740.914276 | 34.24     | TITVALADGGRPDNTGR      |           |           |                 |                 |                   |
| 2        | 15       |             |          |                             | 581.312557 | 1740.916  | 3         |           |         |       | 1740.914276 | 33.7      | TITVALADGGRPDNTGR      |           |           |                 |                 |                   |
| 2        | 16       | IPI00002966 |          | Heat shock 70 kDa protein   | 675.377693 | 1348.741  | 2         | 1         | 2.12    | 0.00  | 1348.737488 | 56.06     | VLATAFDITLGGGR         | 675.3777  | 677.3903  | 3.96            | 1.87            | 2.12              |
| 2        | 16       |             |          |                             | 675.377693 | 1348.741  | 2         |           |         |       | 1348.737488 | 80.48     | VLATAFDITLGGGR         |           |           |                 |                 |                   |
| 2        | 17       | IPI00291175 |          | Isoform 1 of Vinculin       | 544.308623 | 1086.603  | 2         | 2         | 9.10    | 3.41  | 1086.603271 | 32.63     | EAEAASIKIR             | 544.3086  | 546.3212  | 16.8            | 1.46            | 11.51             |
| 2        | 17       |             |          |                             | 599.845943 | 1197.677  | 2         |           |         |       | 1197.674164 | 24.77     | ELTPQVSAAR             |           |           |                 |                 |                   |
| 2        | 17       |             |          |                             | 803.754801 | 2408.243  | 3         |           |         |       | 2408.235977 | 65.6      | LLAVAATAPPDAPNREEVFDER | 803.7548  | 805.0965  | 18.6            | 2.78            | 6.69              |
| 2        | 17       |             |          |                             | 803.754801 | 2408.243  | 3         |           |         |       | 2408.235977 | 34.91     | LLAVAATAPPDAPNREEVFDER |           |           |                 |                 |                   |
| 2        | 17       | IPI00307162 |          | vinculin isoform meta-VCL   | 544.308623 | 1086.603  | 2         | 2         | 9.10    | 3.41  | 1086.603271 | 32.63     | EAEAASIKIR             |           |           |                 |                 |                   |
| 2        | 17       |             |          |                             | 599.845943 | 1197.677  | 2         |           |         |       | 1197.674164 | 24.77     | ELTPQVSAAR             |           |           |                 |                 |                   |
| 2        | 17       |             |          |                             | 803.754801 | 2408.243  | 3         |           |         |       | 2408.235977 | 65.6      | LLAVAATAPPDAPNREEVFDER |           |           |                 |                 |                   |
| 2        | 17       |             |          |                             | 803.754801 | 2408.243  | 3         |           |         |       | 2408.235977 | 34.91     | LLAVAATAPPDAPNREEVFDER |           |           |                 |                 |                   |
| 2        | 18       | IPI00021290 |          | ATP-citrate synthase        | 669.849137 | 1337.684  | 2         | 2         | 3.41    | 1.49  | 1337.678619 | 32.17     | FICTTSAIQNR            | 669.8491  | 671.8617  | 8.42            | 3.57            | 2.36              |
| 2        | 18       |             |          |                             | 669.849137 | 1337.684  | 2         |           |         |       | 1337.678619 | 47.82     | FICTTSAIQNR            |           |           |                 |                 |                   |
| 2        | 18       |             |          |                             | 837.970928 | 1673.927  | 2         |           |         |       | 1673.922394 | 46.29     | DLVSSLTSGLLTIGDR       | 837.9709  | 839.9835  | 13.9            | 3.11            | 4.47              |
| 2        | 18       |             |          |                             | 837.970928 | 1673.927  | 2         |           |         |       | 1673.922394 | 21.66     | DLVSSLTSGLLTIGDR       |           |           |                 |                 |                   |
| 2        | 18       |             |          |                             | 837.970928 | 1673.927  | 2         |           |         |       | 1673.922394 | 39.45     | DLVSSLTSGLLTIGDR       |           |           |                 |                 |                   |
| 2        | 18       | IPI00394838 |          | ATP citrate lyase isoform 2 | 669.849137 | 1337.684  | 2         | 2         | 3.41    | 1.49  | 1337.678619 | 32.17     | FICTTSAIQNR            |           |           |                 |                 |                   |
| 2        | 18       |             |          |                             | 669.849137 | 1337.684  | 2         |           |         |       | 1337.678619 | 47.82     | FICTTSAIQNR            |           |           |                 |                 |                   |
| 2        | 18       |             |          |                             | 837.970928 | 1673.927  | 2         |           |         |       | 1673.922394 | 46.29     | DLVSSLTSGLLTIGDR       |           |           |                 |                 |                   |
| 2        | 18       |             |          |                             | 837.970928 | 1673.927  | 2         |           |         |       | 1673.922394 | 21.66     | DLVSSLTSGLLTIGDR       |           |           |                 |                 |                   |
| 2        | 18       |             |          |                             | 837.970928 | 1673.927  | 2         |           |         |       | 1673.922394 | 39.45     | DLVSSLTSGLLTIGDR       |           |           |                 |                 |                   |
| 2        | 18       | IPI00640847 |          | ATP citrate lyase isoform 1 | 669.849137 | 1337.684  | 2         | 2         | 3.41    | 1.49  | 1337.678619 | 32.17     | FICTTSAIQNR            |           |           |                 |                 |                   |
| 2        | 18       |             |          |                             | 669.849137 | 1337.684  | 2         |           |         |       | 1337.678619 | 47.82     | FICTTSAIQNR            |           |           |                 |                 |                   |
| 2        | 18       |             |          |                             | 837.970928 | 1673.927  | 2         |           |         |       | 1673.922394 | 46.29     | DLVSSLTSGLLTIGDR       |           |           |                 |                 |                   |
| 2        | 18       |             |          |                             | 837.970928 | 1673.927  | 2         |           |         |       | 1673.922394 | 21.66     | DLVSSLTSGLLTIGDR       |           |           |                 |                 |                   |
| 2        | 18       |             |          |                             | 837.970928 | 1673.927  | 2         |           |         |       | 1673.922394 | 39.45     | DLVSSLTSGLLTIGDR       |           |           |                 |                 |                   |

| Band num | prot_hit | nu          | prot_acc | prot_desc                    | pep_exp_mz | pep_exp_n | pep_exp_z | quantific | average | stdev | pep_calc_mr | pep_score | pep_seq                  | light m/z | heavy m/z | light intensity | heavy intensity | ratio light/heavy |
|----------|----------|-------------|----------|------------------------------|------------|-----------|-----------|-----------|---------|-------|-------------|-----------|--------------------------|-----------|-----------|-----------------|-----------------|-------------------|
| 2        | 19       | IPI00013744 |          | Integrin alpha-2 precursor   | 493.288334 | 984.5621  | 2         | 2         | 5.36    | 0.24  | 984.562836  | 38.57     | AIASIPTEP                | 493.2883  | 495.3009  | 10.3            | 1.86            | 5.54              |
| 2        | 19       |             |          |                              | 493.288334 | 984.5621  | 2         |           |         |       | 984.562836  | 36.62     | AIASIPTEP                |           |           |                 |                 |                   |
| 2        | 19       |             |          |                              | 532.605777 | 1594.796  | 3         |           |         |       | 1594.791016 | 36.08     | AVIDQCNDNLR              | 532.6058  | 533.9475  | 40.6            | 7.82            | 5.19              |
| 2        | 19       |             |          |                              | 532.605777 | 1594.796  | 3         |           |         |       | 1594.791016 | 34.01     | AVIDQCNDNLR              |           |           |                 |                 |                   |
| 2        | 20       | IPI00022774 |          | Transitional endoplasmic r   | 635.839713 | 1269.665  | 2         | 2         | 0.34    | 0.00  | 1269.658905 | 44.12     | EVDIGIPDATGR             | 635.8397  | 637.8523  | 4.59            | 13.6            | 0.34              |
| 2        | 20       |             |          |                              | 817.936104 | 1633.858  | 2         |           |         |       | 1633.852203 | 44.85     | AIANEQCANFISIK           | 817.9361  | 819.9487  | 4.59            | 13.6            | 0.34              |
| 2        | 20       | IPI00478540 |          | 89 kDa protein               | 635.839713 | 1269.665  | 2         | 2         | 0.34    | 0.00  | 1269.658905 | 44.12     | EVDIGIPDATGR             |           |           |                 |                 |                   |
| 2        | 20       |             |          |                              | 817.936104 | 1633.858  | 2         |           |         |       | 1633.852203 | 44.85     | AIANEQCANFISIK           |           |           |                 |                 |                   |
| 2        | 21       | IPI00009342 |          | Ras GTPase-activating-like   | 876.94494  | 1751.875  | 2         | 1         | 2.99    | 0.00  | 1751.871399 | 59.78     | EIQSSISGVTAAYNR          | 876.9449  | 878.9575  | 8.08            | 2.7             | 2.99              |
| 2        | 22       | IPI00007402 |          | 120 kDa protein              | 559.821373 | 1117.628  | 2         | 1         | 2.99    | 0.00  | 1117.626831 | 45.37     | AIFQTIQNR                | 559.8214  | 561.8339  | 18.6            | 6.22            | 2.99              |
| 2        | 22       |             |          |                              | 559.821373 | 1117.628  | 2         |           |         |       | 1117.626831 | 46.83     | AIFQTIQNR                |           |           |                 |                 |                   |
| 2        | 22       | IPI00784008 |          | Importin-7                   | 559.821373 | 1117.628  | 2         | 1         | 2.99    | 0.00  | 1117.626831 | 45.37     | AIFQTIQNR                |           |           |                 |                 |                   |
| 2        | 22       |             |          |                              | 559.821373 | 1117.628  | 2         |           |         |       | 1117.626831 | 46.83     | AIFQTIQNR                |           |           |                 |                 |                   |
| 2        | 23       | IPI00217561 |          | Isoform Beta-1C of Integrin  | 655.811657 | 1309.609  | 2         | 1         | 6.11    | 0.00  | 1309.603058 | 44.65     | SLGTDLMNEMR              | 655.8117  | 657.8242  | 18.1            | 2.96            | 6.11              |
| 2        | 23       |             |          |                              | 663.810199 | 1325.606  | 2         |           |         |       | 1325.597977 | 29.94     | SLGTDLMNEMR              |           |           |                 |                 |                   |
| 2        | 23       | IPI00217562 |          | Isoform Beta-1C-2 of Integ   | 655.811657 | 1309.609  | 2         | 1         | 6.11    | 0.00  | 1309.603058 | 44.65     | SLGTDLMNEMR              |           |           |                 |                 |                   |
| 2        | 23       |             |          |                              | 663.810199 | 1325.606  | 2         |           |         |       | 1325.597977 | 29.94     | SLGTDLMNEMR              |           |           |                 |                 |                   |
| 2        | 23       | IPI00217563 |          | Isoform Beta-1A of Integrin  | 655.811657 | 1309.609  | 2         | 1         | 6.11    | 0.00  | 1309.603058 | 44.65     | SLGTDLMNEMR              |           |           |                 |                 |                   |
| 2        | 23       |             |          |                              | 663.810199 | 1325.606  | 2         |           |         |       | 1325.597977 | 29.94     | SLGTDLMNEMR              |           |           |                 |                 |                   |
| 2        | 23       | IPI00293305 |          | Isoform Beta-1B of Integrin  | 655.811657 | 1309.609  | 2         | 1         | 6.11    | 0.00  | 1309.603058 | 44.65     | SLGTDLMNEMR              |           |           |                 |                 |                   |
| 2        | 23       |             |          |                              | 663.810199 | 1325.606  | 2         |           |         |       | 1325.597977 | 29.94     | SLGTDLMNEMR              |           |           |                 |                 |                   |
| 2        | 23       | IPI00549336 |          | Isoform Beta-1D of Integrin  | 655.811657 | 1309.609  | 2         | 1         | 6.11    | 0.00  | 1309.603058 | 44.65     | SLGTDLMNEMR              |           |           |                 |                 |                   |
| 2        | 23       |             |          |                              | 663.810199 | 1325.606  | 2         |           |         |       | 1325.597977 | 29.94     | SLGTDLMNEMR              |           |           |                 |                 |                   |
| 2        | 23       | IPI00645194 |          | integrin beta 1 isoform 1A   | 655.811657 | 1309.609  | 2         | 1         | 6.11    | 0.00  | 1309.603058 | 44.65     | SLGTDLMNEMR              |           |           |                 |                 |                   |
| 2        | 23       |             |          |                              | 663.810199 | 1325.606  | 2         |           |         |       | 1325.597977 | 29.94     | SLGTDLMNEMR              |           |           |                 |                 |                   |
| 2        | 24       | IPI00464978 |          | Insulin receptor substrate 2 | 544.802682 | 1087.591  | 2         | 2         | 9.01    | 2.39  | 1087.589767 | 24.72     | ALTDLVSEGR               | 544.8027  | 546.8152  | 10.7            | 1               | 10.70             |
| 2        | 24       |             |          |                              | 473.280997 | 1416.821  | 3         |           |         |       | 1416.82254  | 32.78     | VALLPAGGALQHSR           | 473.281   | 474.6227  | 32.6            | 4.45            | 7.33              |
| 2        | 24       |             |          |                              | 473.280997 | 1416.821  | 3         |           |         |       | 1416.82254  | 48.9      | VALLPAGGALQHSR           |           |           |                 |                 |                   |
| 2        | 25       | IPI00004503 |          | lysosomal-associated merr    | 531.296484 | 1060.578  | 2         | 1         | 3.85    | 0.00  | 1060.578888 | 29.62     | TVESITDIR                | 531.2965  | 533.809   | 7.12            | 1.85            | 3.85              |
| 2        | 25       |             |          |                              | 531.296484 | 1060.578  | 2         |           |         |       | 1060.578888 | 51.64     | TVESITDIR                |           |           |                 |                 |                   |
| 2        | 25       | IPI00556655 |          | LAMP1 protein variant (Fra   | 531.296484 | 1060.578  | 2         | 1         | 3.85    | 0.00  | 1060.578888 | 29.62     | TVESITDIR                |           |           |                 |                 |                   |
| 2        | 25       |             |          |                              | 531.296484 | 1060.578  | 2         |           |         |       | 1060.578888 | 51.64     | TVESITDIR                |           |           |                 |                 |                   |
| 2        | 26       | IPI00010418 |          | Myosin lc                    | 317.208549 | 632.4025  | 2         | 1         | 6.10    | 1.26  | 632.403412  | 27.89     | GFILR                    | 317.2086  | 319.2211  | 38.3            | 5.48            | 6.99              |
| 2        | 26       |             |          |                              | 551.828447 | 1101.642  | 2         |           |         |       | 1101.6418   | 30.29     | LLSVEGSTLR               | 551.8285  | 553.841   | 45.6            | 8.75            | 5.21              |
| 2        | 26       |             |          |                              | 551.828447 | 1101.642  | 2         |           |         |       | 1101.6418   | 44.76     | LLSVEGSTLR               |           |           |                 |                 |                   |
| 2        | 27       | IPI00220901 |          | TBC1 domain family memt      | 870.910659 | 1739.807  | 2         | 1         | 12.94   | 0.00  | 1739.802658 | 40.53     | ILEDSEGFDEQEFPR          | 870.9107  | 872.9232  | 14.2            | 1.03            | 13.79             |
| 2        | 28       | IPI00013452 |          | glutamyl-prolyl tRNA synth   | 485.788054 | 969.5616  | 2         | 1         | 2.97    | 1.90  | 969.563141  | 29.94     | VAVQGDVVR                | 485.7881  | 487.8006  | 27              | 6.26            | 4.31              |
| 2        | 28       |             |          |                              | 903.441429 | 2707.302  | 3         |           |         |       | 2707.289581 | 31.09     | ERPTPSLNINCTTSEDLSLVLYNR | 903.4414  | 904.7831  | 7.5             | 4.61            | 1.63              |
| 2        | 29       | IPI00556645 |          | forkhead box K1              | 481.770111 | 961.5257  | 2         | 1         | 0.34    | 0.00  | 961.525711  | 22.15     | LASVPEYR                 | 481.7743  | 483.7869  | 4.59            | 13.6            | 0.34              |
| 2        | 29       |             |          |                              | 481.774332 | 961.5341  | 2         |           |         |       | 961.525711  | 37.96     | LASVPEYR                 |           |           |                 |                 |                   |
| 2        | 30       | IPI00646294 |          | RNA pseudouridylate synt     | 429.268921 | 856.5233  | 2         | 1         | 6.30    | 0.00  | 856.515472  | 35.7      | VGTVLGQR                 | 429.2689  | 431.2815  | 58.8            | 9.34            | 6.30              |
| 2        | 31       | IPI00217240 |          | WD repeat protein 75         | 639.346054 | 1276.678  | 2         | 1         | 2.58    | 0.00  | 1276.687378 | 34.2      | SIFTGLMIDPR              | 639.3461  | 641.3586  | 15              | 5.82            | 2.58              |
| 2        | 32       | IPI00297160 |          | CD44 antigen isoform 4 pr    | 591.303082 | 1180.592  | 2         | 1         | 3.57    | 0.00  | 1180.593475 | 34.07     | ALSIFGFCR                | 591.3031  | 593.3156  | 18.3            | 5.12            | 3.57              |
| 2        | 32       | IPI00305064 |          | Isoform CD44 of CD44 ant     | 591.303082 | 1180.592  | 2         | 1         | 3.57    | 0.00  | 1180.593475 | 34.07     | ALSIFGFCR                | 591.3031  | 593.3156  | 18.3            | 5.12            | 3.57              |
| 2        | 32       | IPI00418465 |          | CD44 antigen isoform 2 pr    | 591.303082 | 1180.592  | 2         | 1         | 3.57    | 0.00  | 1180.593475 | 34.07     | ALSIFGFCR                | 591.3031  | 593.3156  | 18.3            | 5.12            | 3.57              |
| 2        | 32       | IPI00419219 |          | CD44 antigen isoform 3 pr    | 591.303082 | 1180.592  | 2         | 1         | 3.57    | 0.00  | 1180.593475 | 34.07     | ALSIFGFCR                | 591.3031  | 593.3156  | 18.3            | 5.12            | 3.57              |
| 2        | 33       | IPI00027481 |          | Multidrug resistance protei  | 451.253697 | 900.4928  | 2         | 1         | L       | 0.00  | 900.49408   | 30.97     | INEGIGDK                 |           |           |                 |                 |                   |
| 2        | 33       |             |          |                              | 451.253697 | 900.4928  | 2         |           |         |       | 900.49408   | 31.38     | INEGIGDK                 |           |           |                 |                 |                   |
| 2        | 33       |             |          |                              | 553.969827 | 1658.888  | 3         |           |         |       | 1658.875107 | 23.87     | LTDDVSKINEGIGDK          | 553.9698  | 556.6532  | 8.3             | 0               | L                 |
| 2        | 34       | IPI00220465 |          | Isoform Alpha of LIM doma    | 399.248342 | 796.4821  | 2         | 2         | 4.22    | 1.25  | 796.483139  | 25.53     | TVSPPIR                  |           |           |                 |                 |                   |
| 2        | 34       |             |          |                              | 601.336686 | 1200.659  | 2         |           |         |       | 1200.648666 | 32.15     | ISANENSLAVR              | 601.3367  | 603.8492  | 31.3            | 9.39            | 3.33              |
| 2        | 34       |             |          |                              | 665.682869 | 1994.027  | 3         |           |         |       | 1994.020508 | 28.37     | NENEIILRPAQLANAR         | 665.6829  | 667.0246  | 19              | 3.72            | 5.11              |
| 2        | 34       | IPI00220466 |          | Isoform 3 of LIM domain ar   | 399.248342 | 796.4821  | 2         | 2         | 4.22    | 1.25  | 796.483139  | 25.53     | TVSPPIR                  |           |           |                 |                 |                   |
| 2        | 34       |             |          |                              | 601.336686 | 1200.659  | 2         |           |         |       | 1200.648666 | 32.15     | ISANENSLAVR              |           |           |                 |                 |                   |
| 2        | 34       |             |          |                              | 665.682869 | 1994.027  | 3         |           |         |       | 1994.020508 | 28.37     | NENEIILRPAQLANAR         |           |           |                 |                 |                   |
| 2        | 34       | IPI00008918 |          | Isoform Beta of LIM domai    | 399.248342 | 796.4821  | 2         | 2         | 4.22    | 1.25  | 796.483139  | 25.53     | TVSPPIR                  |           |           |                 |                 |                   |
| 2        | 34       |             |          |                              | 601.336686 | 1200.659  | 2         |           |         |       | 1200.648666 | 32.15     | ISANENSLAVR              |           |           |                 |                 |                   |
| 2        | 34       |             |          |                              | 665.682869 | 1994.027  | 3         |           |         |       | 1994.020508 | 28.37     | NENEIILRPAQLANAR         |           |           |                 |                 |                   |
| 2        | 35       | IPI00026216 |          | Puromycin-sensitive amino    | 491.909391 | 1472.706  | 3         | 1         | 1.34    | 0.00  | 1472.707245 | 30.89     | AFFESHAPSAER             | 491.9094  | 493.2511  | 10.3            | 7.71            | 1.34              |
| 2        | 36       | IPI00024804 |          | Isoform SERCA1B of Sarco     | 471.257096 | 940.4996  | 2         | 1         | L       | 0.00  | 940.500214  | 30.32     | GAPEGVIDR                | 471.2571  | 473.2697  | 1.26            | 0               | L                 |
| 2        | 36       | IPI00177817 |          | Isoform SERCA2A of Sarco     | 471.257096 | 940.4996  | 2         | 1         | L       | 0.00  | 940.500214  | 30.32     | GAPEGVIDR                |           |           |                 |                 |                   |
| 2        | 36       | IPI00219078 |          | Isoform SERCA2B of Sarco     | 471.257096 | 940.4996  | 2         | 1         | L       | 0.00  | 940.500214  | 30.32     | GAPEGVIDR                |           |           |                 |                 |                   |
| 2        | 36       | IPI00396118 |          | Isoform SERCA1A of Sarco     | 471.257096 | 940.4996  | 2         | 1         | L       | 0.00  | 940.500214  | 30.32     | GAPEGVIDR                |           |           |                 |                 |                   |

| Band num | prot_hit | nu_prot_acc | prot_desc                        | pep_exp_mz | pep_exp_n | pep_exp_z | quantific | average | stdev | pep_calc_mr | pep_score   | pep_seq    | light m/z     | heavy m/z | light intensity | heavy intensity | ratio light/heavy |      |
|----------|----------|-------------|----------------------------------|------------|-----------|-----------|-----------|---------|-------|-------------|-------------|------------|---------------|-----------|-----------------|-----------------|-------------------|------|
| 2        | 36       | IPI00646947 | 95 kDa protein                   | 471.257096 | 940.4996  | 2         | 1         | L       | 0.00  | 940.500214  | 30.32       | GAPEGVVIDR |               |           |                 |                 |                   |      |
| 2        | 37       | IPI00289649 | Tyrosine-protein phosphatase     | 580.365085 | 1158.716  | 2         | 1         | L       | 0.00  | 1158.705017 | 29.42       | KKFFIHQR   | 580.3651      | 584.3902  | 1.26            | 0               | L                 |      |
| 2        | 37       | IPI00647108 | Tyrosine phosphatase             | 580.365085 | 1158.716  | 2         | 1         | L       | 0.00  | 1158.705017 | 29.42       | KKFFIHQR   |               |           |                 |                 |                   |      |
| 3        | 1        | IPI00007765 | Stress-70 protein, mitochondrial | 630.352304 | 1258.69   | 2         | 2         |         | 2.38  | 0.26        | 1258.690552 | 64.87      | QAASSLQQASLK  |           |                 |                 |                   |      |
| 3        | 1        |             |                                  | 644.368967 | 1286.723  | 2         |           |         |       |             | 1286.721863 | 69.83      | QAASSLQQASLK  | 644.369   | 648.3941        | 7.8             | 3.04              | 2.57 |
| 3        | 1        |             |                                  | 644.368967 | 1286.723  | 2         |           |         |       |             | 1286.721863 | 82.55      | QAASSLQQASLK  |           |                 |                 |                   |      |
| 3        | 1        |             |                                  | 644.368967 | 1286.723  | 2         |           |         |       |             | 1286.721863 | 76.36      | QAASSLQQASLK  |           |                 |                 |                   |      |
| 3        | 1        |             |                                  | 466.565106 | 1396.673  | 3         |           |         |       |             | 1396.675949 | 22.65      | ASNGDAWVEAHGK | 466.5651  | 469.2485        | 1.32            | 0.6               | 2.20 |
| 3        | 2        | IPI00304925 | Heat shock 70 kDa protein        | 358.220649 | 714.4267  | 2         | 2         |         | 1.27  | 0.28        | 714.430023  | 21.89      | LIGDAAK       |           |                 |                 |                   |      |
| 3        | 2        |             |                                  | 390.237614 | 778.4607  | 2         |           |         |       |             | 778.461334  | 21.11      | VQVSYK        |           |                 |                 |                   |      |
| 3        | 2        |             |                                  | 430.758349 | 859.5021  | 2         |           |         |       |             | 859.503952  | 25.61      | ITITNDK       |           |                 |                 |                   |      |
| 3        | 2        |             |                                  | 430.758349 | 859.5021  | 2         |           |         |       |             | 859.503952  | 25.15      | ITITNDK       |           |                 |                 |                   |      |
| 3        | 2        |             |                                  | 465.760363 | 929.5062  | 2         |           |         |       |             | 929.509399  | 38.15      | STLEPVEK      |           |                 |                 |                   |      |
| 3        | 2        |             |                                  | 479.776119 | 957.5377  | 2         |           |         |       |             | 957.54071   | 31.47      | STLEPVEK      | 479.7764  | 483.8015        | 1.7             | 1.16              | 1.47 |
| 3        | 2        |             |                                  | 479.776126 | 957.5377  | 2         |           |         |       |             | 957.54071   | 28.88      | STLEPVEK      |           |                 |                 |                   |      |
| 3        | 2        |             |                                  | 479.776426 | 957.5383  | 2         |           |         |       |             | 957.54071   | 43.04      | STLEPVEK      |           |                 |                 |                   |      |
| 3        | 2        |             |                                  | 502.268989 | 1002.523  | 2         |           |         |       |             | 1002.525772 | 64.51      | SAVEDEGLK     |           |                 |                 |                   |      |
| 3        | 2        |             |                                  | 516.291857 | 1030.569  | 2         |           |         |       |             | 1030.568298 | 20.96      | LSKEEIER      |           |                 |                 |                   |      |
| 3        | 2        |             |                                  | 597.314575 | 1192.615  | 2         |           |         |       |             | 1192.611237 | 25.98      | YKAEDEVQR     |           |                 |                 |                   |      |
| 3        | 2        |             |                                  | 597.314575 | 1192.615  | 2         |           |         |       |             | 1192.611237 | 33.69      | YKAEDEVQR     |           |                 |                 |                   |      |
| 3        | 2        |             |                                  | 628.836966 | 1255.659  | 2         |           |         |       |             | 1255.65448  | 68.14      | VEIANDQGNR    | 628.8371  | 630.8496        | 113             | 105               | 1.08 |
| 3        | 2        |             |                                  | 628.837074 | 1255.66   | 2         |           |         |       |             | 1255.65448  | 45.22      | VEIANDQGNR    |           |                 |                 |                   |      |
| 3        | 2        |             |                                  | 628.837074 | 1255.66   | 2         |           |         |       |             | 1255.65448  | 71.59      | VEIANDQGNR    |           |                 |                 |                   |      |
| 3        | 2        | IPI00514377 | heat shock 70kDa protein         | 358.220649 | 714.4267  | 2         | 2         |         | 1.27  | 0.28        | 714.430023  | 21.89      | LIGDAAK       |           |                 |                 |                   |      |
| 3        | 2        |             |                                  | 390.237614 | 778.4607  | 2         |           |         |       |             | 778.461334  | 21.11      | VQVSYK        |           |                 |                 |                   |      |
| 3        | 2        |             |                                  | 430.758349 | 859.5021  | 2         |           |         |       |             | 859.503952  | 25.61      | ITITNDK       |           |                 |                 |                   |      |
| 3        | 2        |             |                                  | 430.758349 | 859.5021  | 2         |           |         |       |             | 859.503952  | 25.15      | ITITNDK       |           |                 |                 |                   |      |
| 3        | 2        |             |                                  | 465.760363 | 929.5062  | 2         |           |         |       |             | 929.509399  | 38.15      | STLEPVEK      |           |                 |                 |                   |      |
| 3        | 2        |             |                                  | 479.776119 | 957.5377  | 2         |           |         |       |             | 957.54071   | 31.47      | STLEPVEK      |           |                 |                 |                   |      |
| 3        | 2        |             |                                  | 479.776126 | 957.5377  | 2         |           |         |       |             | 957.54071   | 28.88      | STLEPVEK      |           |                 |                 |                   |      |
| 3        | 2        |             |                                  | 479.776426 | 957.5383  | 2         |           |         |       |             | 957.54071   | 43.04      | STLEPVEK      |           |                 |                 |                   |      |
| 3        | 2        |             |                                  | 502.268989 | 1002.523  | 2         |           |         |       |             | 1002.525772 | 64.51      | SAVEDEGLK     |           |                 |                 |                   |      |
| 3        | 2        |             |                                  | 516.291857 | 1030.569  | 2         |           |         |       |             | 1030.568298 | 20.96      | LSKEEIER      |           |                 |                 |                   |      |
| 3        | 2        |             |                                  | 597.314575 | 1192.615  | 2         |           |         |       |             | 1192.611237 | 25.98      | YKAEDEVQR     |           |                 |                 |                   |      |
| 3        | 2        |             |                                  | 597.314575 | 1192.615  | 2         |           |         |       |             | 1192.611237 | 33.69      | YKAEDEVQR     |           |                 |                 |                   |      |
| 3        | 2        |             |                                  | 628.836966 | 1255.659  | 2         |           |         |       |             | 1255.65448  | 68.14      | VEIANDQGNR    |           |                 |                 |                   |      |
| 3        | 2        |             |                                  | 628.837074 | 1255.66   | 2         |           |         |       |             | 1255.65448  | 45.22      | VEIANDQGNR    |           |                 |                 |                   |      |
| 3        | 2        |             |                                  | 628.837074 | 1255.66   | 2         |           |         |       |             | 1255.65448  | 71.59      | VEIANDQGNR    |           |                 |                 |                   |      |
| 3        | 2        | IPI00643932 | heat shock 70kDa protein         | 358.220649 | 714.4267  | 2         | 2         |         | 1.27  | 0.28        | 714.430023  | 21.89      | LIGDAAK       |           |                 |                 |                   |      |
| 3        | 2        |             |                                  | 390.237614 | 778.4607  | 2         |           |         |       |             | 778.461334  | 21.11      | VQVSYK        |           |                 |                 |                   |      |
| 3        | 2        |             |                                  | 430.758349 | 859.5021  | 2         |           |         |       |             | 859.503952  | 25.61      | ITITNDK       |           |                 |                 |                   |      |
| 3        | 2        |             |                                  | 430.758349 | 859.5021  | 2         |           |         |       |             | 859.503952  | 25.15      | ITITNDK       |           |                 |                 |                   |      |
| 3        | 2        |             |                                  | 465.760363 | 929.5062  | 2         |           |         |       |             | 929.509399  | 38.15      | STLEPVEK      |           |                 |                 |                   |      |
| 3        | 2        |             |                                  | 479.776119 | 957.5377  | 2         |           |         |       |             | 957.54071   | 31.47      | STLEPVEK      |           |                 |                 |                   |      |
| 3        | 2        |             |                                  | 479.776126 | 957.5377  | 2         |           |         |       |             | 957.54071   | 28.88      | STLEPVEK      |           |                 |                 |                   |      |
| 3        | 2        |             |                                  | 479.776426 | 957.5383  | 2         |           |         |       |             | 957.54071   | 43.04      | STLEPVEK      |           |                 |                 |                   |      |
| 3        | 2        |             |                                  | 502.268989 | 1002.523  | 2         |           |         |       |             | 1002.525772 | 64.51      | SAVEDEGLK     |           |                 |                 |                   |      |
| 3        | 2        |             |                                  | 516.291857 | 1030.569  | 2         |           |         |       |             | 1030.568298 | 20.96      | LSKEEIER      |           |                 |                 |                   |      |
| 3        | 2        |             |                                  | 597.314575 | 1192.615  | 2         |           |         |       |             | 1192.611237 | 25.98      | YKAEDEVQR     |           |                 |                 |                   |      |
| 3        | 2        |             |                                  | 597.314575 | 1192.615  | 2         |           |         |       |             | 1192.611237 | 33.69      | YKAEDEVQR     |           |                 |                 |                   |      |
| 3        | 2        |             |                                  | 628.836966 | 1255.659  | 2         |           |         |       |             | 1255.65448  | 68.14      | VEIANDQGNR    |           |                 |                 |                   |      |
| 3        | 2        |             |                                  | 628.837074 | 1255.66   | 2         |           |         |       |             | 1255.65448  | 45.22      | VEIANDQGNR    |           |                 |                 |                   |      |
| 3        | 2        |             |                                  | 628.837074 | 1255.66   | 2         |           |         |       |             | 1255.65448  | 71.59      | VEIANDQGNR    |           |                 |                 |                   |      |
| 3        | 3        | IPI00003362 | heat shock 70kDa protein         | 358.220649 | 714.4267  | 2         |           |         |       |             | 714.430023  | 21.89      | LIGDAAK       |           |                 |                 |                   |      |
| 3        | 3        |             |                                  | 473.758559 | 945.5026  | 2         |           |         |       |             | 945.504318  | 22         | VLESDLK       |           |                 |                 |                   |      |
| 3        | 3        |             |                                  | 473.758559 | 945.5026  | 2         |           |         |       |             | 945.504318  | 40.04      | VLESDLK       |           |                 |                 |                   |      |
| 3        | 3        |             |                                  | 487.774431 | 973.5343  | 2         |           |         |       |             | 973.535629  | 28.88      | VLESDLK       |           |                 |                 |                   |      |
| 3        | 3        |             |                                  | 487.774433 | 973.5343  | 2         |           |         |       |             | 973.535629  | 21.98      | VLESDLK       |           |                 |                 |                   |      |
| 3        | 3        |             |                                  | 488.2706   | 974.5266  | 2         |           |         |       |             | 974.528366  | 21.36      | VMEHFIK       |           |                 |                 |                   |      |
| 3        | 3        |             |                                  | 551.796696 | 1101.579  | 2         |           |         |       |             | 1101.580292 | 32.57      | ITITNDQNR     |           |                 |                 |                   |      |
| 3        | 3        |             |                                  | 551.796696 | 1101.579  | 2         |           |         |       |             | 1101.580292 | 46.16      | ITITNDQNR     |           |                 |                 |                   |      |
| 3        | 3        |             |                                  | 551.796701 | 1101.579  | 2         |           |         |       |             | 1101.580292 | 42.12      | ITITNDQNR     |           |                 |                 |                   |      |
| 3        | 3        |             |                                  | 610.336073 | 1218.658  | 2         |           |         |       |             | 1218.663254 | 22.85      | VYEGERPLTK    |           |                 |                 |                   |      |



| Band num | prot_hit | nu prot_acc | prot_desc                   | pep_exp_mz | pep_exp_n | pep_exp_z | quantific | average | stdev | pep_calc_mr | pep_score | pep_seq            | light m/z | heavy m/z | light intensity | heavy intensity | ratio light/heavy |
|----------|----------|-------------|-----------------------------|------------|-----------|-----------|-----------|---------|-------|-------------|-----------|--------------------|-----------|-----------|-----------------|-----------------|-------------------|
| 3        | 3        |             |                             | 407.226533 | 1218.658  | 3         |           |         |       | 1218.663254 | 24.3      | VYEGERPLTK         |           |           |                 |                 |                   |
| 3        | 3        |             |                             | 610.336342 | 1218.658  | 2         |           |         |       | 1218.663254 | 31.98     | VYEGERPLTK         |           |           |                 |                 |                   |
| 3        | 3        |             |                             | 624.354341 | 1246.694  | 2         |           |         |       | 1246.694565 | 34.29     | VYEGERPLTK         |           |           |                 |                 |                   |
| 3        | 3        |             |                             | 624.354684 | 1246.695  | 2         |           |         |       | 1246.694565 | 28.84     | VYEGERPLTK         | 624.3546  | 628.3797  | 11.3            | 3.16            | 3.58              |
| 3        | 3        |             |                             | 628.836966 | 1255.659  | 2         |           |         |       | 1255.65448  | 68.14     | VEIANDQGNR         |           |           |                 |                 |                   |
| 3        | 3        |             |                             | 628.837074 | 1255.66   | 2         |           |         |       | 1255.65448  | 45.22     | VEIANDQGNR         |           |           |                 |                 |                   |
| 3        | 3        |             |                             | 628.837074 | 1255.66   | 2         |           |         |       | 1255.65448  | 71.59     | VEIANDQGNR         |           |           |                 |                 |                   |
| 3        | 4        | IPI00554711 | Junction plakoglobin        | 690.82799  | 1379.641  | 2         | 2         | 2.51    | 1.17  | 1379.637558 | 69.79     | TMQNTSDDLDTAR      | 690.828   | 692.8406  | 9.72            | 5.78            | 1.68              |
| 3        | 4        |             |                             | 698.838224 | 1395.662  | 2         |           |         |       | 1395.65892  | 22.06     | HPEAEMAQNSVR       |           |           |                 |                 |                   |
| 3        | 4        |             |                             | 814.415872 | 1626.817  | 2         |           |         |       | 1626.813843 | 39.96     | HVAAGTQQPYTDGVR    | 814.4159  | 816.4284  | 1.37            | 0.41            | 3.34              |
| 3        | 4        |             |                             | 814.415872 | 1626.817  | 2         |           |         |       | 1626.813843 | 63.47     | HVAAGTQQPYTDGVR    |           |           |                 |                 |                   |
| 3        | 4        |             |                             | 814.415872 | 1626.817  | 2         |           |         |       | 1626.813843 | 63.59     | HVAAGTQQPYTDGVR    |           |           |                 |                 |                   |
| 3        | 5        | IPI00003865 | Isoform 1 of Heat shock co  | 358.220649 | 714.4267  | 2         | 1         | 1.31    | 0.00  | 714.430023  | 21.89     | LIGDAAK            |           |           |                 |                 |                   |
| 3        | 5        |             |                             | 430.758349 | 859.5021  | 2         |           |         |       | 859.503952  | 25.61     | ITITNDK            |           |           |                 |                 |                   |
| 3        | 5        |             |                             | 430.758349 | 859.5021  | 2         |           |         |       | 859.503952  | 25.15     | ITITNDK            |           |           |                 |                 |                   |
| 3        | 5        |             |                             | 443.74854  | 885.4825  | 2         |           |         |       | 885.483185  | 40.2      | GLDLPVEK           | 443.7485  | 445.7611  | 7.85            | 5.99            | 1.31              |
| 3        | 5        |             |                             | 443.74854  | 885.4825  | 2         |           |         |       | 885.483185  | 43.44     | GLDLPVEK           |           |           |                 |                 |                   |
| 3        | 5        |             |                             | 457.763438 | 913.5123  | 2         |           |         |       | 913.514496  | 33.53     | GLDLPVEK           |           |           |                 |                 |                   |
| 3        | 5        |             |                             | 457.76379  | 913.513   | 2         |           |         |       | 913.514496  | 33.99     | GLDLPVEK           |           |           |                 |                 |                   |
| 3        | 5        |             |                             | 457.76379  | 913.513   | 2         |           |         |       | 913.514496  | 33.99     | GLDLPVEK           |           |           |                 |                 |                   |
| 3        | 5        |             |                             | 628.836966 | 1255.659  | 2         |           |         |       | 1255.65448  | 68.14     | VEIANDQGNR         |           |           |                 |                 |                   |
| 3        | 5        |             |                             | 628.837074 | 1255.66   | 2         |           |         |       | 1255.65448  | 45.22     | VEIANDQGNR         |           |           |                 |                 |                   |
| 3        | 5        |             |                             | 628.837074 | 1255.66   | 2         |           |         |       | 1255.65448  | 71.59     | VEIANDQGNR         |           |           |                 |                 |                   |
| 3        | 6        | IPI00009326 | 65 kDa Yes-associated prc   | 629.338146 | 1256.662  | 2         |           |         |       | 1256.65715  | 36.97     | TANVPQTVPMP        |           |           |                 |                 |                   |
| 3        | 6        |             |                             | 603.648871 | 1807.925  | 3         |           |         |       | 1807.920105 | 56.71     | QASTDAGTAGALTPQHVR |           |           |                 |                 |                   |
| 3        | 6        |             |                             | 603.648871 | 1807.925  | 3         |           |         |       | 1807.920105 | 37.85     | QASTDAGTAGALTPQHVR |           |           |                 |                 |                   |
| 3        | 6        |             |                             | 603.648871 | 1807.925  | 3         |           |         |       | 1807.920105 | 61.3      | QASTDAGTAGALTPQHVR |           |           |                 |                 |                   |
| 3        | 6        |             |                             | 904.969981 | 1807.925  | 2         |           |         |       | 1807.920105 | 55.49     | QASTDAGTAGALTPQHVR |           |           |                 |                 |                   |
| 3        | 6        | IPI00216919 | YAP1 protein                | 629.338146 | 1256.662  | 2         |           |         |       | 1256.65715  | 36.97     | TANVPQTVPMP        |           |           |                 |                 |                   |
| 3        | 6        |             |                             | 603.648871 | 1807.925  | 3         |           |         |       | 1807.920105 | 56.71     | QASTDAGTAGALTPQHVR |           |           |                 |                 |                   |
| 3        | 6        |             |                             | 603.648871 | 1807.925  | 3         |           |         |       | 1807.920105 | 37.85     | QASTDAGTAGALTPQHVR |           |           |                 |                 |                   |
| 3        | 6        |             |                             | 603.648871 | 1807.925  | 3         |           |         |       | 1807.920105 | 61.3      | QASTDAGTAGALTPQHVR |           |           |                 |                 |                   |
| 3        | 6        |             |                             | 904.969981 | 1807.925  | 2         |           |         |       | 1807.920105 | 55.49     | QASTDAGTAGALTPQHVR |           |           |                 |                 |                   |
| 3        | 7        | IPI00643920 | Transketolase               | 389.216195 | 776.4178  | 2         | 3         | 2.97    | 0.38  | 776.420532  | 33.25     | AFDQIR             | 389.2162  | 391.2288  | 20.5            | 7.92            | 2.59              |
| 3        | 7        |             |                             | 389.216195 | 776.4178  | 2         |           |         |       | 776.420532  | 29        | AFDQIR             |           |           |                 |                 |                   |
| 3        | 7        |             |                             | 436.253713 | 870.4929  | 2         |           |         |       | 870.494751  | 31.66     | DAIAQAVR           | 436.2537  | 438.2663  | 156             | 52.6            | 2.97              |
| 3        | 7        |             |                             | 436.253713 | 870.4929  | 2         |           |         |       | 870.494751  | 46.59     | DAIAQAVR           |           |           |                 |                 |                   |
| 3        | 7        |             |                             | 472.773315 | 943.5321  | 2         |           |         |       | 943.53627   | 30.24     | AVELAANTK          |           |           |                 |                 |                   |
| 3        | 7        |             |                             | 486.789493 | 971.5644  | 2         |           |         |       | 971.567581  | 51.43     | AVELAANTK          |           |           |                 |                 |                   |
| 3        | 7        |             |                             | 486.789758 | 971.565   | 2         |           |         |       | 971.567581  | 32.86     | AVELAANTK          |           |           |                 |                 |                   |
| 3        | 7        |             |                             | 503.806468 | 1005.598  | 2         |           |         |       | 1005.599564 | 29.59     | HQPTAIAK           |           |           |                 |                 |                   |
| 3        | 7        |             |                             | 503.807    | 1005.599  | 2         |           |         |       | 1005.599564 | 26.52     | HQPTAIAK           |           |           |                 |                 |                   |
| 3        | 7        |             |                             | 431.56705  | 1291.679  | 3         |           |         |       | 1291.679657 | 47.89     | ISSDLDGHPVPK       | 431.5671  | 432.9088  | 11.6            | 3.47            | 3.34              |
| 3        | 7        |             |                             | 440.909704 | 1319.707  | 3         |           |         |       | 1319.710968 | 41.08     | ISSDLDGHPVPK       |           |           |                 |                 |                   |
| 3        | 7        |             |                             | 440.909704 | 1319.707  | 3         |           |         |       | 1319.710968 | 38.44     | ISSDLDGHPVPK       |           |           |                 |                 |                   |
| 3        | 7        |             |                             | 440.910464 | 1319.71   | 3         |           |         |       | 1319.710968 | 31.3      | ISSDLDGHPVPK       |           |           |                 |                 |                   |
| 3        | 8        | IPI00334775 | Hypothetical protein DKFZ   | 343.74484  | 685.4751  | 2         | 2         | 3.67    | 0.94  | 685.476242  | 26.13     | VVVITK             |           |           |                 |                 |                   |
| 3        | 8        |             |                             | 534.267242 | 1066.52   | 2         |           |         |       | 1066.520706 | 20.88     | YESLTDPSK          |           |           |                 |                 |                   |
| 3        | 8        |             |                             | 548.282948 | 1094.551  | 2         |           |         |       | 1094.552017 | 29.89     | YESLTDPSK          | 548.283   | 552.3081  | 3.69            | 0.85            | 4.34              |
| 3        | 8        |             |                             | 585.30085  | 1168.587  | 2         |           |         |       | 1168.58609  | 40.65     | LGIHEDSTNR         |           |           |                 |                 |                   |
| 3        | 8        |             |                             | 585.301344 | 1168.588  | 2         |           |         |       | 1168.58609  | 52.44     | LGIHEDSTNR         |           |           |                 |                 |                   |
| 3        | 8        |             |                             | 590.298959 | 1178.583  | 2         |           |         |       | 1178.584351 | 42.93     | YIDQEELNK          | 590.299   | 592.3115  | 9.95            | 3.31            | 3.01              |
| 3        | 8        |             |                             | 590.298969 | 1178.583  | 2         |           |         |       | 1178.584351 | 32.21     | YIDQEELNK          |           |           |                 |                 |                   |
| 3        | 8        |             |                             | 604.315368 | 1206.616  | 2         |           |         |       | 1206.615662 | 35.38     | YIDQEELNK          |           |           |                 |                 |                   |
| 3        | 8        | IPI00414676 | Heat shock protein HSP 9C   | 343.74484  | 685.4751  | 2         | 2         | 3.67    | 0.94  | 685.476242  | 26.13     | VVVITK             |           |           |                 |                 |                   |
| 3        | 8        |             |                             | 534.267242 | 1066.52   | 2         |           |         |       | 1066.520706 | 20.88     | YESLTDPSK          |           |           |                 |                 |                   |
| 3        | 8        |             |                             | 548.282948 | 1094.551  | 2         |           |         |       | 1094.552017 | 29.89     | YESLTDPSK          |           |           |                 |                 |                   |
| 3        | 8        |             |                             | 585.30085  | 1168.587  | 2         |           |         |       | 1168.58609  | 40.65     | LGIHEDSTNR         |           |           |                 |                 |                   |
| 3        | 8        |             |                             | 585.301344 | 1168.588  | 2         |           |         |       | 1168.58609  | 52.44     | LGIHEDSTNR         |           |           |                 |                 |                   |
| 3        | 8        |             |                             | 590.298959 | 1178.583  | 2         |           |         |       | 1178.584351 | 42.93     | YIDQEELNK          |           |           |                 |                 |                   |
| 3        | 8        |             |                             | 590.298969 | 1178.583  | 2         |           |         |       | 1178.584351 | 32.21     | YIDQEELNK          |           |           |                 |                 |                   |
| 3        | 8        |             |                             | 604.315368 | 1206.616  | 2         |           |         |       | 1206.615662 | 35.38     | YIDQEELNK          |           |           |                 |                 |                   |
| 3        | 9        | IPI00152418 | Decay-accelerating factor 5 | 323.862788 | 968.5665  | 3         | 2         | 1.82    | 0.37  | 968.567932  | 25.12     | REPSLSPK           | 323.8633  | 326.5467  | 1.6             | 0.77            | 2.08              |

| Band num | prot_hit | nu          | prot_acc | prot_desc                     | pep_exp_mz | pep_exp_n | pep_exp_z | quantific | average | stdev | pep_calc_mr | pep_score | pep_seq       | light m/z | heavy m/z | light intensity | heavy intensity | ratio light/heavy |
|----------|----------|-------------|----------|-------------------------------|------------|-----------|-----------|-----------|---------|-------|-------------|-----------|---------------|-----------|-----------|-----------------|-----------------|-------------------|
| 3        | 9        |             |          |                               | 529.257654 | 1056.501  | 2         |           |         |       | 1056.504669 | 25.55     | SCPNPGEIR     | 529.2596  | 531.2722  | 25.4            | 16.3            | 1.56              |
| 3        | 9        |             |          |                               | 529.257654 | 1056.501  | 2         |           |         |       | 1056.504669 | 41.85     | SCPNPGEIR     |           |           |                 |                 |                   |
| 3        | 9        |             |          |                               | 529.257698 | 1056.501  | 2         |           |         |       | 1056.504669 | 32.26     | SCPNPGEIR     |           |           |                 |                 |                   |
| 3        | 9        | IPI00216550 |          | Isoform 1 of Complement c     | 323.862788 | 968.5665  | 3         | 2         | 1.82    | 0.37  | 968.567932  | 25.12     | REPSLSPK      |           |           |                 |                 |                   |
| 3        | 9        |             |          |                               | 529.257654 | 1056.501  | 2         |           |         |       | 1056.504669 | 25.55     | SCPNPGEIR     |           |           |                 |                 |                   |
| 3        | 9        |             |          |                               | 529.257654 | 1056.501  | 2         |           |         |       | 1056.504669 | 41.85     | SCPNPGEIR     |           |           |                 |                 |                   |
| 3        | 9        |             |          |                               | 529.257698 | 1056.501  | 2         |           |         |       | 1056.504669 | 32.26     | SCPNPGEIR     |           |           |                 |                 |                   |
| 3        | 9        | IPI00292069 |          | Isoform 2 of Complement c     | 323.862788 | 968.5665  | 3         | 2         | 1.82    | 0.37  | 968.567932  | 25.12     | REPSLSPK      |           |           |                 |                 |                   |
| 3        | 9        |             |          |                               | 529.257654 | 1056.501  | 2         |           |         |       | 1056.504669 | 25.55     | SCPNPGEIR     |           |           |                 |                 |                   |
| 3        | 9        |             |          |                               | 529.257654 | 1056.501  | 2         |           |         |       | 1056.504669 | 41.85     | SCPNPGEIR     |           |           |                 |                 |                   |
| 3        | 9        |             |          |                               | 529.257698 | 1056.501  | 2         |           |         |       | 1056.504669 | 32.26     | SCPNPGEIR     |           |           |                 |                 |                   |
| 3        | 9        | IPI00382926 |          | Decay-accelerating factor s   | 323.862788 | 968.5665  | 3         | 2         | 1.82    | 0.37  | 968.567932  | 25.12     | REPSLSPK      |           |           |                 |                 |                   |
| 3        | 9        |             |          |                               | 529.257654 | 1056.501  | 2         |           |         |       | 1056.504669 | 25.55     | SCPNPGEIR     |           |           |                 |                 |                   |
| 3        | 9        |             |          |                               | 529.257654 | 1056.501  | 2         |           |         |       | 1056.504669 | 41.85     | SCPNPGEIR     |           |           |                 |                 |                   |
| 3        | 9        |             |          |                               | 529.257698 | 1056.501  | 2         |           |         |       | 1056.504669 | 32.26     | SCPNPGEIR     |           |           |                 |                 |                   |
| 3        | 9        | IPI00647119 |          | Decay accelerating factor f   | 323.862788 | 968.5665  | 3         | 2         | 1.82    | 0.37  | 968.567932  | 25.12     | REPSLSPK      |           |           |                 |                 |                   |
| 3        | 9        |             |          |                               | 529.257654 | 1056.501  | 2         |           |         |       | 1056.504669 | 25.55     | SCPNPGEIR     |           |           |                 |                 |                   |
| 3        | 9        |             |          |                               | 529.257654 | 1056.501  | 2         |           |         |       | 1056.504669 | 41.85     | SCPNPGEIR     |           |           |                 |                 |                   |
| 3        | 9        |             |          |                               | 529.257698 | 1056.501  | 2         |           |         |       | 1056.504669 | 32.26     | SCPNPGEIR     |           |           |                 |                 |                   |
| 3        | 9        | IPI00783145 |          | Decay-accelerating factor s   | 323.862788 | 968.5665  | 3         | 2         | 1.82    | 0.37  | 968.567932  | 25.12     | REPSLSPK      |           |           |                 |                 |                   |
| 3        | 9        |             |          |                               | 529.257654 | 1056.501  | 2         |           |         |       | 1056.504669 | 25.55     | SCPNPGEIR     |           |           |                 |                 |                   |
| 3        | 9        |             |          |                               | 529.257654 | 1056.501  | 2         |           |         |       | 1056.504669 | 41.85     | SCPNPGEIR     |           |           |                 |                 |                   |
| 3        | 9        |             |          |                               | 529.257698 | 1056.501  | 2         |           |         |       | 1056.504669 | 32.26     | SCPNPGEIR     |           |           |                 |                 |                   |
| 3        | 9        | IPI00784169 |          | Decay-accelerating factor s   | 323.862788 | 968.5665  | 3         | 2         | 1.82    | 0.37  | 968.567932  | 25.12     | REPSLSPK      |           |           |                 |                 |                   |
| 3        | 9        |             |          |                               | 529.257654 | 1056.501  | 2         |           |         |       | 1056.504669 | 25.55     | SCPNPGEIR     |           |           |                 |                 |                   |
| 3        | 9        |             |          |                               | 529.257698 | 1056.501  | 2         |           |         |       | 1056.504669 | 41.85     | SCPNPGEIR     |           |           |                 |                 |                   |
| 3        | 9        |             |          |                               | 529.257698 | 1056.501  | 2         |           |         |       | 1056.504669 | 32.26     | SCPNPGEIR     |           |           |                 |                 |                   |
| 3        | 10       | IPI00012079 |          | Eukaryotic translation initia | 661.838492 | 1321.662  | 2         | 1         | 2.56    | 0.00  | 1321.665039 | 45.76     | VAPAQPSEEGPGR | 661.8385  | 663.8511  | 0.69            | 0.27            | 2.56              |
| 3        | 10       | IPI00439415 |          | eukaryotic translation initia | 661.838492 | 1321.662  | 2         | 1         | 2.56    | 0.00  | 1321.665039 | 45.76     | VAPAQPSEEGPGR |           |           |                 |                 |                   |
| 3        | 11       | IPI00306239 |          | Katanin p80 WD40-contain      | 437.756976 | 873.4994  | 2         | 1         | 58.68   | 0.00  | 873.499359  | 25.06     | MATPVVTK      | 437.7578  | 439.7704  | 710             | 12.1            | 58.68             |
| 3        | 11       |             |          |                               | 437.756976 | 873.4994  | 2         |           |         |       | 873.499359  | 25.16     | MATPVVTK      |           |           |                 |                 |                   |
| 3        | 11       |             |          |                               | 437.756976 | 873.4994  | 2         |           |         |       | 873.499359  | 39.11     | MATPVVTK      |           |           |                 |                 |                   |
| 3        | 11       |             |          |                               | 437.757832 | 873.5011  | 2         |           |         |       | 873.499359  | 39.38     | MATPVVTK      |           |           |                 |                 |                   |
| 3        | 11       |             |          |                               | 437.757832 | 873.5011  | 2         |           |         |       | 873.499359  | 32.83     | MATPVVTK      |           |           |                 |                 |                   |
| 3        | 11       | IPI00746256 |          | 73 kDa protein                | 437.756976 | 873.4994  | 2         | 1         | 58.68   | 0.00  | 873.499359  | 25.06     | MATPVVTK      |           |           |                 |                 |                   |
| 3        | 11       |             |          |                               | 437.756976 | 873.4994  | 2         |           |         |       | 873.499359  | 25.16     | MATPVVTK      |           |           |                 |                 |                   |
| 3        | 11       |             |          |                               | 437.756976 | 873.4994  | 2         |           |         |       | 873.499359  | 39.11     | MATPVVTK      |           |           |                 |                 |                   |
| 3        | 11       |             |          |                               | 437.757832 | 873.5011  | 2         |           |         |       | 873.499359  | 39.38     | MATPVVTK      |           |           |                 |                 |                   |
| 3        | 11       |             |          |                               | 437.757832 | 873.5011  | 2         |           |         |       | 873.499359  | 32.83     | MATPVVTK      |           |           |                 |                 |                   |
| 3        | 12       | IPI00219365 |          | Moesin                        | 496.265102 | 990.5157  | 2         | 3         | 2.61    | 0.34  | 990.519257  | 20.87     | ISQLEMAR      | 496.2651  | 498.2777  | 3.73            | 1.45            | 2.57              |
| 3        | 12       |             |          |                               | 421.220015 | 1260.638  | 3         |           |         |       | 1260.638794 | 30.35     | IQVWHEEHR     | 421.22    | 422.5617  | 12              | 5.24            | 2.29              |
| 3        | 12       |             |          |                               | 421.220015 | 1260.638  | 3         |           |         |       | 1260.638794 | 33.19     | IQVWHEEHR     |           |           |                 |                 |                   |
| 3        | 12       |             |          |                               | 477.554316 | 1429.641  | 3         |           |         |       | 1429.646652 | 32.86     | TANDMIHAENMR  | 477.5543  | 478.896   | 3.45            | 1.16            | 2.97              |
| 3        | 13       | IPI00007219 |          | Cytochrome P450 2C9           | 379.723999 | 757.4334  | 2         | 1         | 2.94    | 0.00  | 757.43338   | 24.03     | LNENIK        | 379.724   | 381.7366  | 44.7            | 15.2            | 2.94              |
| 3        | 13       |             |          |                               | 379.723999 | 757.4334  | 2         |           |         |       | 757.43338   | 35.15     | LNENIK        |           |           |                 |                 |                   |
| 3        | 13       | IPI00016066 |          | PREDICTED: similar to Pu      | 379.723999 | 757.4334  | 2         | 1         | 2.94    | 0.00  | 757.43338   | 24.03     | LNENIK        |           |           |                 |                 |                   |
| 3        | 13       |             |          |                               | 379.723999 | 757.4334  | 2         |           |         |       | 757.43338   | 35.15     | LNENIK        |           |           |                 |                 |                   |
| 3        | 13       | IPI00396329 |          | Brix domain-containing pro    | 379.723999 | 757.4334  | 2         | 1         | 2.94    | 0.00  | 757.43338   | 24.03     | LNENIK        |           |           |                 |                 |                   |
| 3        | 13       |             |          |                               | 379.723999 | 757.4334  | 2         |           |         |       | 757.43338   | 35.15     | LNENIK        |           |           |                 |                 |                   |
| 3        | 14       | IPI00025417 |          | Zinc finger protein 45        | 531.280621 | 1060.547  | 2         | 1         | 4.96    | 0.00  | 1060.551254 | 34.39     | DNSSGAKNLK    | 531.2806  | 533.2932  | 12              | 2.42            | 4.96              |
| 3        | 14       |             |          |                               | 531.280652 | 1060.547  | 2         |           |         |       | 1060.551254 | 25.35     | DNSSGAKNLK    |           |           |                 |                 |                   |
| 3        | 14       | IPI00444117 |          | CDNA FLJ45839 fis, clone      | 531.280621 | 1060.547  | 2         | 1         | 4.96    | 0.00  | 1060.551254 | 34.39     | DNSSGAKNLK    |           |           |                 |                 |                   |
| 3        | 14       |             |          |                               | 531.280652 | 1060.547  | 2         |           |         |       | 1060.551254 | 25.35     | DNSSGAKNLK    |           |           |                 |                 |                   |
| 3        | 15       | IPI00168421 |          | F-box protein 15              | 629.901265 | 1257.788  | 2         | 1         | 1.51    | 0.00  | 1257.787323 | 32.48     | IFGLGWAILK    | 629.9013  | 631.9138  | 1.8             | 1.19            | 1.51              |
| 3        | 15       | IPI00643350 |          | 20 kDa protein                | 629.901265 | 1257.788  | 2         | 1         | 1.51    | 0.00  | 1257.787323 | 32.48     | IFGLGWAILK    |           |           |                 |                 |                   |
| 3        | 16       | IPI00164387 |          | Isoform 5 of Calcium-activ    | 353.209442 | 704.4043  | 2         | 1         | 2.42    | 0.00  | 704.409317  | 32.4      | TSNSIK        | 353.2094  | 855.222   | 60.1            | 24.8            | 2.42              |
| 3        | 16       |             |          |                               | 353.209485 | 704.4044  | 2         |           |         |       | 704.409317  | 20.69     | TSNSIK        |           |           |                 |                 |                   |
| 3        | 16       | IPI00410168 |          | Isoform 2 of Calcium-activ    | 353.209442 | 704.4043  | 2         | 1         | 2.42    | 0.00  | 704.409317  | 32.4      | TSNSIK        |           |           |                 |                 |                   |
| 3        | 16       |             |          |                               | 353.209485 | 704.4044  | 2         |           |         |       | 704.409317  | 20.69     | TSNSIK        |           |           |                 |                 |                   |
| 3        | 16       | IPI00410169 |          | Isoform 3 of Calcium-activ    | 353.209442 | 704.4043  | 2         | 1         | 2.42    | 0.00  | 704.409317  | 32.4      | TSNSIK        |           |           |                 |                 |                   |
| 3        | 16       |             |          |                               | 353.209485 | 704.4044  | 2         |           |         |       | 704.409317  | 20.69     | TSNSIK        |           |           |                 |                 |                   |
| 3        | 16       | IPI00410170 |          | Isoform 4 of Calcium-activ    | 353.209442 | 704.4043  | 2         | 1         | 2.42    | 0.00  | 704.409317  | 32.4      | TSNSIK        |           |           |                 |                 |                   |
| 3        | 16       |             |          |                               | 353.209485 | 704.4044  | 2         |           |         |       | 704.409317  | 20.69     | TSNSIK        |           |           |                 |                 |                   |

| Band num | prot_hit | nu_prot_acc | prot_desc                   | pep_exp_mz | pep_exp_n | pep_exp_z | quantific | average | stdev | pep_calc_mr | pep_score | pep_seq      | light m/z | heavy m/z | light intensity | heavy intensity | ratio light/heavy |
|----------|----------|-------------|-----------------------------|------------|-----------|-----------|-----------|---------|-------|-------------|-----------|--------------|-----------|-----------|-----------------|-----------------|-------------------|
| 3        | 16       | IPI00410173 | Isoform 7 of Calcium-activ  | 353.209442 | 704.4043  | 2         | 1         | 2.42    | 0.00  | 704.409317  | 32.4      | TSNSIK       |           |           |                 |                 |                   |
| 3        | 16       |             |                             | 353.209485 | 704.4044  | 2         |           |         |       | 704.409317  | 20.69     | TSNSIK       |           |           |                 |                 |                   |
| 3        | 16       | IPI00426186 | Potassium large conductar   | 353.209442 | 704.4043  | 2         | 1         | 2.42    | 0.00  | 704.409317  | 32.4      | TSNSIK       |           |           |                 |                 |                   |
| 3        | 16       |             |                             | 353.209485 | 704.4044  | 2         |           |         |       | 704.409317  | 20.69     | TSNSIK       |           |           |                 |                 |                   |
| 3        | 16       | IPI00478411 | Isoform 1 of Calcium-activ  | 353.209442 | 704.4043  | 2         | 1         | 2.42    | 0.00  | 704.409317  | 32.4      | TSNSIK       |           |           |                 |                 |                   |
| 3        | 16       |             |                             | 353.209485 | 704.4044  | 2         |           |         |       | 704.409317  | 20.69     | TSNSIK       |           |           |                 |                 |                   |
| 3        | 16       | IPI00642051 | Potassium large conductar   | 353.209442 | 704.4043  | 2         | 1         | 2.42    | 0.00  | 704.409317  | 32.4      | TSNSIK       |           |           |                 |                 |                   |
| 3        | 16       |             |                             | 353.209485 | 704.4044  | 2         |           |         |       | 704.409317  | 20.69     | TSNSIK       |           |           |                 |                 |                   |
| 3        | 16       | IPI00642598 | Potassium large conductar   | 353.209442 | 704.4043  | 2         | 1         | 2.42    | 0.00  | 704.409317  | 32.4      | TSNSIK       |           |           |                 |                 |                   |
| 3        | 16       |             |                             | 353.209485 | 704.4044  | 2         |           |         |       | 704.409317  | 20.69     | TSNSIK       |           |           |                 |                 |                   |
| 3        | 16       | IPI00644663 | Potassium large conductar   | 353.209442 | 704.4043  | 2         | 1         | 2.42    | 0.00  | 704.409317  | 32.4      | TSNSIK       |           |           |                 |                 |                   |
| 3        | 16       |             |                             | 353.209485 | 704.4044  | 2         |           |         |       | 704.409317  | 20.69     | TSNSIK       |           |           |                 |                 |                   |
| 3        | 16       | IPI00645064 | Potassium large conductar   | 353.209442 | 704.4043  | 2         | 1         | 2.42    | 0.00  | 704.409317  | 32.4      | TSNSIK       |           |           |                 |                 |                   |
| 3        | 16       |             |                             | 353.209485 | 704.4044  | 2         |           |         |       | 704.409317  | 20.69     | TSNSIK       |           |           |                 |                 |                   |
| 3        | 16       | IPI00645602 | Potassium large conductar   | 353.209442 | 704.4043  | 2         | 1         | 2.42    | 0.00  | 704.409317  | 32.4      | TSNSIK       |           |           |                 |                 |                   |
| 3        | 16       |             |                             | 353.209485 | 704.4044  | 2         |           |         |       | 704.409317  | 20.69     | TSNSIK       |           |           |                 |                 |                   |
| 3        | 16       | IPI00645778 | Potassium large conductar   | 353.209442 | 704.4043  | 2         | 1         | 2.42    | 0.00  | 704.409317  | 32.4      | TSNSIK       |           |           |                 |                 |                   |
| 3        | 16       |             |                             | 353.209485 | 704.4044  | 2         |           |         |       | 704.409317  | 20.69     | TSNSIK       |           |           |                 |                 |                   |
| 3        | 16       | IPI00647276 | Potassium large conductar   | 353.209442 | 704.4043  | 2         | 1         | 2.42    | 0.00  | 704.409317  | 32.4      | TSNSIK       |           |           |                 |                 |                   |
| 3        | 16       |             |                             | 353.209485 | 704.4044  | 2         |           |         |       | 704.409317  | 20.69     | TSNSIK       |           |           |                 |                 |                   |
| 3        | 17       | IPI00019088 | Collagen alpha-2(I) chain   | 438.222814 | 874.4311  | 2         | 1         | 5.38    | 0.00  | 874.43306   | 31.92     | MAAATASPR    | 438.2228  | 440.2354  | 15.6            | 2.9             | 5.38              |
| 3        | 17       | IPI00647776 | Collagen, type IX, alpha 2  | 438.222814 | 874.4311  | 2         | 1         | 5.38    | 0.00  | 874.43306   | 31.92     | MAAATASPR    |           |           |                 |                 |                   |
| 3        | 18       | IPI00016759 | Synaptic vesicular amine tr | 729.850197 | 1457.686  | 2         | 1         | 11.84   | 0.00  | 1457.682892 | 20.46     | MAILMDHNCPIK |           |           |                 |                 |                   |
| 3        | 18       |             |                             | 743.867166 | 1485.72   | 2         |           |         |       | 1485.714203 | 20.29     | MAILMDHNCPIK | 743.8672  | 745.8797  | 4.5             | 0.38            | 11.84             |
| 3        | 18       |             |                             | 743.867166 | 1485.72   | 2         |           |         |       | 1485.714203 | 31.86     | MAILMDHNCPIK |           |           |                 |                 |                   |
| 4        | 1        | IPI00305589 | Isoform 1 of 6-phosphofruc  | 407.251341 | 812.4881  | 2         | 4         | 6.16    | 0.89  | 812.489258  | 28.77     | VINVGQR      |           |           |                 |                 |                   |
| 4        | 1        |             |                             | 427.234921 | 852.4553  | 2         |           |         |       | 852.455215  | 21.06     | TIYLGR       |           |           |                 |                 |                   |
| 4        | 1        |             |                             | 427.234921 | 852.4553  | 2         |           |         |       | 852.455215  | 21.76     | TIYLGR       |           |           |                 |                 |                   |
| 4        | 1        |             |                             | 427.234958 | 852.4554  | 2         |           |         |       | 852.455215  | 23.6      | TIYLGR       |           |           |                 |                 |                   |
| 4        | 1        |             |                             | 431.250662 | 860.4868  | 2         |           |         |       | 860.489273  | 32.31     | QFAQALR      |           |           |                 |                 |                   |
| 4        | 1        |             |                             | 431.250662 | 860.4868  | 2         |           |         |       | 860.489273  | 35.54     | QFAQALR      |           |           |                 |                 |                   |
| 4        | 1        |             |                             | 431.709087 | 861.4036  | 2         |           |         |       | 861.404541  | 24.25     | SYDFFR       |           |           |                 |                 |                   |
| 4        | 1        |             |                             | 431.709087 | 861.4036  | 2         |           |         |       | 861.404541  | 29.24     | SYDFFR       |           |           |                 |                 |                   |
| 4        | 1        |             |                             | 459.276997 | 916.5394  | 2         |           |         |       | 916.540665  | 21.57     | VWTSQLK      |           |           |                 |                 |                   |
| 4        | 1        |             |                             | 459.276997 | 916.5394  | 2         |           |         |       | 916.540665  | 23.5      | VWTSQLK      |           |           |                 |                 |                   |
| 4        | 1        |             |                             | 459.276997 | 916.5394  | 2         |           |         |       | 916.540665  | 25.24     | VWTSQLK      |           |           |                 |                 |                   |
| 4        | 1        |             |                             | 494.775121 | 987.5357  | 2         |           |         |       | 987.537323  | 26.11     | IGGDSGLSVR   |           |           |                 |                 |                   |
| 4        | 1        |             |                             | 494.775121 | 987.5357  | 2         |           |         |       | 987.537323  | 64.04     | IGGDSGLSVR   |           |           |                 |                 |                   |
| 4        | 1        |             |                             | 498.288167 | 994.5618  | 2         |           |         |       | 994.562408  | 32.54     | VFNLGVYR     |           |           |                 |                 |                   |
| 4        | 1        |             |                             | 498.288167 | 994.5618  | 2         |           |         |       | 994.562408  | 35.79     | VFNLGVYR     |           |           |                 |                 |                   |
| 4        | 1        |             |                             | 498.288167 | 994.5618  | 2         |           |         |       | 994.562408  | 29.24     | VFNLGVYR     |           |           |                 |                 |                   |
| 4        | 1        |             |                             | 504.7727   | 1007.531  | 2         |           |         |       | 1007.531204 | 20.45     | VQDYIQSK     |           |           |                 |                 |                   |
| 4        | 1        |             |                             | 518.788287 | 1035.562  | 2         |           |         |       | 1035.562515 | 36.38     | VQDYIQSK     |           |           |                 |                 |                   |
| 4        | 1        |             |                             | 526.773486 | 1051.532  | 2         |           |         |       | 1051.53627  | 25.85     | YPEEFALR     |           |           |                 |                 |                   |
| 4        | 1        |             |                             | 526.773544 | 1051.533  | 2         |           |         |       | 1051.53627  | 34.67     | YPEEFALR     |           |           |                 |                 |                   |
| 4        | 1        |             |                             | 531.285668 | 1060.557  | 2         |           |         |       | 1060.557739 | 60.21     | GADELPYLR    | 531.2857  | 533.2982  | 69.6            | 12.1            | 5.75              |
| 4        | 1        |             |                             | 531.285668 | 1060.557  | 2         |           |         |       | 1060.557739 | 64.33     | GADELPYLR    |           |           |                 |                 |                   |
| 4        | 1        |             |                             | 531.285683 | 1060.557  | 2         |           |         |       | 1060.557739 | 64.24     | GADELPYLR    |           |           |                 |                 |                   |
| 4        | 1        |             |                             | 532.795103 | 1063.576  | 2         |           |         |       | 1063.57605  | 24.94     | LTPVAYGCK    |           |           |                 |                 |                   |
| 4        | 1        |             |                             | 532.795103 | 1063.576  | 2         |           |         |       | 1063.57605  | 44.1      | LTPVAYGCK    |           |           |                 |                 |                   |
| 4        | 1        |             |                             | 532.795103 | 1063.576  | 2         |           |         |       | 1063.57605  | 37.67     | LTPVAYGCK    |           |           |                 |                 |                   |
| 4        | 1        |             |                             | 536.305763 | 1070.597  | 2         |           |         |       | 1070.597137 | 29.52     | CPLHTIFK     |           |           |                 |                 |                   |
| 4        | 1        |             |                             | 357.873431 | 1070.598  | 3         |           |         |       | 1070.597137 | 29.17     | CPLHTIFK     |           |           |                 |                 |                   |
| 4        | 1        |             |                             | 357.873431 | 1070.598  | 3         |           |         |       | 1070.597137 | 27.62     | CPLHTIFK     |           |           |                 |                 |                   |
| 4        | 1        |             |                             | 539.264423 | 1076.514  | 2         |           |         |       | 1076.516281 | 32.88     | VSSPDYPER    |           |           |                 |                 |                   |
| 4        | 1        |             |                             | 539.264423 | 1076.514  | 2         |           |         |       | 1076.516281 | 39.99     | VSSPDYPER    |           |           |                 |                 |                   |
| 4        | 1        |             |                             | 539.264459 | 1076.514  | 2         |           |         |       | 1076.516281 | 35.9      | VSSPDYPER    |           |           |                 |                 |                   |
| 4        | 1        |             |                             | 590.824872 | 1179.635  | 2         |           |         |       | 1179.638443 | 69.82     | LNVEAVNTHR   | 590.8249  | 592.8374  | 48.7            | 8.4             | 5.80              |
| 4        | 1        |             |                             | 590.824872 | 1179.635  | 2         |           |         |       | 1179.638443 | 64.03     | LNVEAVNTHR   |           |           |                 |                 |                   |
| 4        | 1        |             |                             | 590.824872 | 1179.635  | 2         |           |         |       | 1179.638443 | 66.78     | LNVEAVNTHR   |           |           |                 |                 |                   |
| 4        | 1        |             |                             | 394.219674 | 1179.637  | 3         |           |         |       | 1179.638443 | 41.96     | LNVEAVNTHR   |           |           |                 |                 |                   |
| 4        | 1        |             |                             | 394.219674 | 1179.637  | 3         |           |         |       | 1179.638443 | 50.07     | LNVEAVNTHR   |           |           |                 |                 |                   |
| 4        | 1        |             |                             | 394.21968  | 1179.637  | 3         |           |         |       | 1179.638443 | 43.88     | LNVEAVNTHR   |           |           |                 |                 |                   |

| Band num | prot_hit_nu | prot_acc    | prot_desc                 | pep_exp_mz | pep_exp_n | pep_exp_z | quantific | average | stdev | pep_calc_mr | pep_score | pep_seq          | light m/z | heavy m/z | light intensity | heavy intensity | ratio light/heavy |
|----------|-------------|-------------|---------------------------|------------|-----------|-----------|-----------|---------|-------|-------------|-----------|------------------|-----------|-----------|-----------------|-----------------|-------------------|
| 4        | 1           |             |                           | 604.825714 | 1207.637  | 2         |           |         |       | 1207.637375 | 30.6      | RYPEEFALR        |           |           |                 |                 |                   |
| 4        | 1           |             |                           | 604.825893 | 1207.637  | 2         |           |         |       | 1207.637375 | 21.66     | RYPEEFALR        |           |           |                 |                 |                   |
| 4        | 1           |             |                           | 629.826633 | 1257.639  | 2         |           |         |       | 1257.637756 | 36.69     | HGESEFNLLGK      |           |           |                 |                 |                   |
| 4        | 1           |             |                           | 636.848992 | 1271.683  | 2         |           |         |       | 1271.681946 | 21.71     | LEPVIMELER       |           |           |                 |                 |                   |
| 4        | 1           |             |                           | 637.3467   | 1272.679  | 2         |           |         |       | 1272.6772   | 46.03     | QCALVALEDVK      |           |           |                 |                 |                   |
| 4        | 1           |             |                           | 637.346941 | 1272.679  | 2         |           |         |       | 1272.6772   | 51.7      | QCALVALEDVK      |           |           |                 |                 |                   |
| 4        | 1           |             |                           | 643.842313 | 1285.67   | 2         |           |         |       | 1285.669067 | 57.53     | HGESEFNLLGK      | 643.8424  | 645.8549  | 9.82            | 1.31            | 7.50              |
| 4        | 1           |             |                           | 643.842384 | 1285.67   | 2         |           |         |       | 1285.669067 | 79.57     | HGESEFNLLGK      |           |           |                 |                 |                   |
| 4        | 1           |             |                           | 651.361517 | 1300.708  | 2         |           |         |       | 1300.708511 | 60.13     | QCALVALEDVK      |           |           |                 |                 |                   |
| 4        | 1           |             |                           | 651.362629 | 1300.711  | 2         |           |         |       | 1300.708511 | 58.56     | QCALVALEDVK      |           |           |                 |                 |                   |
| 4        | 1           |             |                           | 696.867813 | 1391.721  | 2         |           |         |       | 1391.72084  | 55.69     | FLEEQEITDLK      |           |           |                 |                 |                   |
| 4        | 1           |             |                           | 696.867813 | 1391.721  | 2         |           |         |       | 1391.72084  | 66.71     | FLEEQEITDLK      |           |           |                 |                 |                   |
| 4        | 1           |             |                           | 710.885015 | 1419.755  | 2         |           |         |       | 1419.752151 | 68.98     | FLEEQEITDLK      | 710.885   | 714.9101  | 6.9             | 1.23            | 5.61              |
| 4        | 1           |             |                           | 726.381325 | 1450.748  | 2         |           |         |       | 1450.744049 | 23.05     | NSFTPLSSSNTIR    |           |           |                 |                 |                   |
| 4        | 1           |             |                           | 770.376418 | 1538.738  | 2         |           |         |       | 1538.738937 | 64.98     | YPGGESYQDLVQR    |           |           |                 |                 |                   |
| 4        | 1           |             |                           | 770.376418 | 1538.738  | 2         |           |         |       | 1538.738937 | 60.94     | YPGGESYQDLVQR    |           |           |                 |                 |                   |
| 4        | 1           |             |                           | 770.376418 | 1538.738  | 2         |           |         |       | 1538.738937 | 67.33     | YPGGESYQDLVQR    |           |           |                 |                 |                   |
| 4        | 1           |             |                           | 527.296636 | 1578.868  | 3         |           |         |       | 1578.868835 | 55.43     | QGNVLVISHQAVMR   |           |           |                 |                 |                   |
| 4        | 1           |             |                           | 527.296636 | 1578.868  | 3         |           |         |       | 1578.868835 | 57.3      | QGNVLVISHQAVMR   |           |           |                 |                 |                   |
| 4        | 1           |             |                           | 527.296636 | 1578.868  | 3         |           |         |       | 1578.868835 | 42.57     | QGNVLVISHQAVMR   |           |           |                 |                 |                   |
| 4        | 1           |             |                           | 532.627749 | 1594.861  | 3         |           |         |       | 1594.863754 | 45.72     | QGNVLVISHQAVMR   |           |           |                 |                 |                   |
| 4        | 1           |             |                           | 532.627749 | 1594.861  | 3         |           |         |       | 1594.863754 | 50.46     | QGNVLVISHQAVMR   |           |           |                 |                 |                   |
| 4        | 1           |             |                           | 563.977375 | 1688.91   | 3         |           |         |       | 1688.909653 | 27.03     | IVYYLMNIHVQPR    |           |           |                 |                 |                   |
| 4        | 1           |             |                           | 563.977375 | 1688.91   | 3         |           |         |       | 1688.909653 | 58.55     | IVYYLMNIHVQPR    |           |           |                 |                 |                   |
| 4        | 1           |             |                           | 845.465749 | 1688.917  | 2         |           |         |       | 1688.909653 | 48.16     | IVYYLMNIHVQPR    |           |           |                 |                 |                   |
| 4        | 1           |             |                           | 845.465749 | 1688.917  | 2         |           |         |       | 1688.909653 | 58.45     | IVYYLMNIHVQPR    |           |           |                 |                 |                   |
| 4        | 2           | IPI00303476 | ATP synthase subunit beta | 533.81686  | 1065.619  | 2         | 3         | 2.29    | 0.61  | 1065.620667 | 33.23     | IPVGPETLGR       |           |           |                 |                 |                   |
| 4        | 2           |             |                           | 645.840499 | 1289.666  | 2         |           |         |       | 1289.667358 | 46.2      | TIAMDGTGLVLR     |           |           |                 |                 |                   |
| 4        | 2           |             |                           | 645.840933 | 1289.667  | 2         |           |         |       | 1289.667358 | 49.38     | TIAMDGTGLVLR     |           |           |                 |                 |                   |
| 4        | 2           |             |                           | 707.37846  | 1412.742  | 2         |           |         |       | 1412.735764 | 60.67     | IMNVIGEPIDER     | 707.3785  | 709.391   | 5.58            | 1.93            | 2.89              |
| 4        | 2           |             |                           | 707.37846  | 1412.742  | 2         |           |         |       | 1412.735764 | 61.43     | IMNVIGEPIDER     |           |           |                 |                 |                   |
| 4        | 2           |             |                           | 707.37846  | 1412.742  | 2         |           |         |       | 1412.735764 | 65.79     | IMNVIGEPIDER     |           |           |                 |                 |                   |
| 4        | 2           |             |                           | 815.427679 | 1628.841  | 2         |           |         |       | 1628.836853 | 62.21     | VALVYQGMNEPPGAR  | 815.4277  | 817.4403  | 2.38            | 1.03            | 2.31              |
| 4        | 2           |             |                           | 815.427722 | 1628.841  | 2         |           |         |       | 1628.836853 | 80.48     | VALVYQGMNEPPGAR  |           |           |                 |                 |                   |
| 4        | 2           |             |                           | 815.427722 | 1628.841  | 2         |           |         |       | 1628.836853 | 60.73     | VALVYQGMNEPPGAR  |           |           |                 |                 |                   |
| 4        | 2           |             |                           | 815.431668 | 1628.849  | 2         |           |         |       | 1628.836853 | 34.93     | VALVYQGMNEPPGAR  |           |           |                 |                 |                   |
| 4        | 2           |             |                           | 823.42569  | 1644.837  | 2         |           |         |       | 1644.831772 | 51.12     | VALVYQGMNEPPGAR  |           |           |                 |                 |                   |
| 4        | 2           |             |                           | 823.42569  | 1644.837  | 2         |           |         |       | 1644.831772 | 39.92     | VALVYQGMNEPPGAR  |           |           |                 |                 |                   |
| 4        | 2           |             |                           | 560.321908 | 1677.944  | 3         |           |         |       | 1677.943771 | 48.06     | LVLEVAQHLGESTVR  |           |           |                 |                 |                   |
| 4        | 2           |             |                           | 560.321908 | 1677.944  | 3         |           |         |       | 1677.943771 | 54.7      | LVLEVAQHLGESTVR  |           |           |                 |                 |                   |
| 4        | 2           |             |                           | 839.981625 | 1677.949  | 2         |           |         |       | 1677.943771 | 115.37    | LVLEVAQHLGESTVR  |           |           |                 |                 |                   |
| 4        | 2           |             |                           | 839.981625 | 1677.949  | 2         |           |         |       | 1677.943771 | 111.78    | LVLEVAQHLGESTVR  | 839.9816  | 841.9942  | 5.57            | 3.32            | 1.68              |
| 4        | 2           |             |                           | 839.981625 | 1677.949  | 2         |           |         |       | 1677.943771 | 121.77    | LVLEVAQHLGESTVR  |           |           |                 |                 |                   |
| 4        | 2           |             |                           | 615.307164 | 1842.9    | 3         |           |         |       | 1842.895844 | 53.97     | IMDPNIVGSEHYDVAR |           |           |                 |                 |                   |
| 4        | 2           |             |                           | 615.307164 | 1842.9    | 3         |           |         |       | 1842.895844 | 57.25     | IMDPNIVGSEHYDVAR |           |           |                 |                 |                   |
| 4        | 2           |             |                           | 615.307164 | 1842.9    | 3         |           |         |       | 1842.895844 | 50.46     | IMDPNIVGSEHYDVAR |           |           |                 |                 |                   |
| 4        | 2           |             |                           | 922.459078 | 1842.904  | 2         |           |         |       | 1842.895844 | 36.83     | IMDPNIVGSEHYDVAR |           |           |                 |                 |                   |
| 4        | 3           | IPI00007752 | Tubulin beta-2C chain     | 528.779477 | 1055.544  | 2         | 3         | 2.67    | 0.08  | 1055.545822 | 39.87     | TAVCDIPPR        | 528.7798  | 530.7923  | 4.1             | 1.57            | 2.61              |
| 4        | 3           |             |                           | 528.779727 | 1055.545  | 2         |           |         |       | 1055.545822 | 55.42     | TAVCDIPPR        |           |           |                 |                 |                   |
| 4        | 3           |             |                           | 528.779766 | 1055.545  | 2         |           |         |       | 1055.545822 | 55.69     | TAVCDIPPR        |           |           |                 |                 |                   |
| 4        | 3           |             |                           | 369.192113 | 1104.555  | 3         |           |         |       | 1104.558807 | 28.92     | IREEYPDR         |           |           |                 |                 |                   |
| 4        | 3           |             |                           | 553.284533 | 1104.555  | 2         |           |         |       | 1104.558807 | 32.58     | IREEYPDR         |           |           |                 |                 |                   |
| 4        | 3           |             |                           | 553.284644 | 1104.555  | 2         |           |         |       | 1104.558807 | 24.44     | IREEYPDR         |           |           |                 |                 |                   |
| 4        | 3           |             |                           | 553.284864 | 1104.555  | 2         |           |         |       | 1104.558807 | 30.77     | IREEYPDR         |           |           |                 |                 |                   |
| 4        | 3           |             |                           | 579.817124 | 1157.62   | 2         |           |         |       | 1157.621735 | 26.65     | FPGQLNADLR       |           |           |                 |                 |                   |
| 4        | 3           |             |                           | 579.81725  | 1157.62   | 2         |           |         |       | 1157.621735 | 30.26     | FPGQLNADLR       |           |           |                 |                 |                   |
| 4        | 3           |             |                           | 579.817733 | 1157.621  | 2         |           |         |       | 1157.621735 | 28.4      | FPGQLNADLR       |           |           |                 |                 |                   |
| 4        | 3           |             |                           | 594.334372 | 1186.654  | 2         |           |         |       | 1186.65567  | 29.02     | LAVNMVPPFR       |           |           |                 |                 |                   |
| 4        | 3           |             |                           | 594.334372 | 1186.654  | 2         |           |         |       | 1186.65567  | 42.63     | LAVNMVPPFR       |           |           |                 |                 |                   |
| 4        | 3           |             |                           | 637.317871 | 1272.621  | 2         |           |         |       | 1272.61969  | 32.22     | ISEQFTAMFR       |           |           |                 |                 |                   |
| 4        | 3           |             |                           | 637.317871 | 1272.621  | 2         |           |         |       | 1272.61969  | 30.05     | ISEQFTAMFR       |           |           |                 |                 |                   |
| 4        | 3           |             |                           | 674.373728 | 1346.733  | 2         |           |         |       | 1346.729233 | 52.7      | IMNTFSVVPSPK     |           |           |                 |                 |                   |
| 4        | 3           |             |                           | 678.847274 | 1355.68   | 2         |           |         |       | 1355.67453  | 38.55     | INVYNEATGGK      |           |           |                 |                 |                   |

| Band num | prot_hit | nu | prot_acc    | prot_desc                   | pep_exp_mz | pep_exp_n | pep_exp_z | quantific | average     | stdev | pep_calc_mr | pep_score | pep_seq           | light m/z | heavy m/z | light intensity | heavy intensity | ratio light/heavy |
|----------|----------|----|-------------|-----------------------------|------------|-----------|-----------|-----------|-------------|-------|-------------|-----------|-------------------|-----------|-----------|-----------------|-----------------|-------------------|
| 4        | 4        | 3  |             |                             | 682.372904 | 1362.731  | 2         |           | 1362.724152 |       | 1362.724152 | 45.74     | IMNTFSVVPSPK      |           |           |                 |                 |                   |
| 4        | 4        | 3  |             |                             | 682.372904 | 1362.731  | 2         |           | 1362.724152 |       | 1362.724152 | 35.84     | IMNTFSVVPSPK      |           |           |                 |                 |                   |
| 4        | 4        | 3  |             |                             | 688.389528 | 1374.765  | 2         |           | 1374.760544 |       | 1374.760544 | 42.67     | IMNTFSVVPSPK      |           |           |                 |                 |                   |
| 4        | 4        | 3  |             |                             | 692.861577 | 1383.709  | 2         |           | 1383.705841 |       | 1383.705841 | 44.32     | INVYNEATGGK       |           |           |                 |                 |                   |
| 4        | 4        | 3  |             |                             | 692.861577 | 1383.709  | 2         |           | 1383.705841 |       | 1383.705841 | 47.8      | INVYNEATGGK       |           |           |                 |                 |                   |
| 4        | 4        | 3  |             |                             | 737.8687   | 1473.723  | 2         |           | 1473.715759 |       | 1473.715759 | 88.39     | EVDEQMLNVQNK      |           |           |                 |                 |                   |
| 4        | 4        | 3  |             |                             | 737.8687   | 1473.723  | 2         |           | 1473.715759 |       | 1473.715759 | 85.29     | EVDEQMLNVQNK      |           |           |                 |                 |                   |
| 4        | 4        | 3  |             |                             | 751.883369 | 1501.752  | 2         |           | 1501.74707  |       | 1501.74707  | 101.7     | EVDEQMLNVQNK      | 751.8834  | 755.9085  | 2.34            | 0.86            | 2.72              |
| 4        | 4        | 3  |             |                             | 751.883369 | 1501.752  | 2         |           | 1501.74707  |       | 1501.74707  | 87.88     | EVDEQMLNVQNK      |           |           |                 |                 |                   |
| 4        | 4        | 3  |             |                             | 823.430551 | 1644.847  | 2         |           | 1644.84169  |       | 1644.84169  | 71.77     | AVLDLEPGTMDSVR    |           |           |                 |                 |                   |
| 4        | 4        | 3  |             |                             | 823.430551 | 1644.847  | 2         |           | 1644.84169  |       | 1644.84169  | 74.12     | AVLDLEPGTMDSVR    |           |           |                 |                 |                   |
| 4        | 4        | 3  |             |                             | 823.430551 | 1644.847  | 2         |           | 1644.84169  |       | 1644.84169  | 28.7      | AVLDLEPGTMDSVR    |           |           |                 |                 |                   |
| 4        | 4        | 3  |             |                             | 617.657934 | 1849.952  | 3         |           | 1849.949265 |       | 1849.949265 | 42.11     | EIVHLQAGQCGNQIGAK |           |           |                 |                 |                   |
| 4        | 4        | 3  |             |                             | 617.657934 | 1849.952  | 3         |           | 1849.949265 |       | 1849.949265 | 44.69     | EIVHLQAGQCGNQIGAK |           |           |                 |                 |                   |
| 4        | 4        | 4  | IPI00011654 | Tubulin beta-2 chain        | 528.779477 | 1055.544  | 2         | 3         | 2.67        | 0.08  | 1055.545822 | 39.87     | TAVCDIPPR         |           |           |                 |                 |                   |
| 4        | 4        | 4  |             |                             | 528.779727 | 1055.545  | 2         |           | 1055.545822 |       | 1055.545822 | 55.42     | TAVCDIPPR         |           |           |                 |                 |                   |
| 4        | 4        | 4  |             |                             | 528.779766 | 1055.545  | 2         |           | 1055.545822 |       | 1055.545822 | 55.69     | TAVCDIPPR         |           |           |                 |                 |                   |
| 4        | 4        | 4  |             |                             | 369.192113 | 1104.555  | 3         |           | 1104.558807 |       | 1104.558807 | 28.92     | IREEYPDR          |           |           |                 |                 |                   |
| 4        | 4        | 4  |             |                             | 553.284533 | 1104.555  | 2         |           | 1104.558807 |       | 1104.558807 | 32.58     | IREEYPDR          |           |           |                 |                 |                   |
| 4        | 4        | 4  |             |                             | 553.284644 | 1104.555  | 2         |           | 1104.558807 |       | 1104.558807 | 24.44     | IREEYPDR          |           |           |                 |                 |                   |
| 4        | 4        | 4  |             |                             | 553.284864 | 1104.555  | 2         |           | 1104.558807 |       | 1104.558807 | 30.77     | IREEYPDR          |           |           |                 |                 |                   |
| 4        | 4        | 4  |             |                             | 579.817124 | 1157.62   | 2         |           | 1157.621735 |       | 1157.621735 | 26.65     | FPGQLNADLR        |           |           |                 |                 |                   |
| 4        | 4        | 4  |             |                             | 579.81725  | 1157.62   | 2         |           | 1157.621735 |       | 1157.621735 | 30.26     | FPGQLNADLR        |           |           |                 |                 |                   |
| 4        | 4        | 4  |             |                             | 579.817733 | 1157.621  | 2         |           | 1157.621735 |       | 1157.621735 | 28.4      | FPGQLNADLR        |           |           |                 |                 |                   |
| 4        | 4        | 4  |             |                             | 594.334372 | 1186.654  | 2         |           | 1186.65567  |       | 1186.65567  | 29.02     | LAVNMVPPFR        |           |           |                 |                 |                   |
| 4        | 4        | 4  |             |                             | 594.334372 | 1186.654  | 2         |           | 1186.65567  |       | 1186.65567  | 42.63     | LAVNMVPPFR        |           |           |                 |                 |                   |
| 4        | 4        | 4  |             |                             | 637.317871 | 1272.621  | 2         |           | 1272.61969  |       | 1272.61969  | 32.22     | ISEQFTAMFR        |           |           |                 |                 |                   |
| 4        | 4        | 4  |             |                             | 637.317871 | 1272.621  | 2         |           | 1272.61969  |       | 1272.61969  | 30.05     | ISEQFTAMFR        |           |           |                 |                 |                   |
| 4        | 4        | 4  |             |                             | 665.341214 | 1328.668  | 2         |           | 1328.663635 |       | 1328.663635 | 40.31     | ISVYNEATGGK       |           |           |                 |                 |                   |
| 4        | 4        | 4  |             |                             | 665.341214 | 1328.668  | 2         |           | 1328.663635 |       | 1328.663635 | 34.84     | ISVYNEATGGK       |           |           |                 |                 |                   |
| 4        | 4        | 4  |             |                             | 674.373728 | 1346.733  | 2         |           | 1346.729233 |       | 1346.729233 | 52.7      | IMNTFSVVPSPK      |           |           |                 |                 |                   |
| 4        | 4        | 4  |             |                             | 682.372904 | 1362.731  | 2         |           | 1362.724152 |       | 1362.724152 | 45.74     | IMNTFSVVPSPK      |           |           |                 |                 |                   |
| 4        | 4        | 4  |             |                             | 682.372904 | 1362.731  | 2         |           | 1362.724152 |       | 1362.724152 | 35.84     | IMNTFSVVPSPK      |           |           |                 |                 |                   |
| 4        | 4        | 4  |             |                             | 688.389528 | 1374.765  | 2         |           | 1374.760544 |       | 1374.760544 | 42.67     | IMNTFSVVPSPK      |           |           |                 |                 |                   |
| 4        | 4        | 4  |             |                             | 737.8687   | 1473.723  | 2         |           | 1473.715759 |       | 1473.715759 | 88.39     | EVDEQMLNVQNK      |           |           |                 |                 |                   |
| 4        | 4        | 4  |             |                             | 737.8687   | 1473.723  | 2         |           | 1473.715759 |       | 1473.715759 | 85.29     | EVDEQMLNVQNK      |           |           |                 |                 |                   |
| 4        | 4        | 4  |             |                             | 751.883369 | 1501.752  | 2         |           | 1501.74707  |       | 1501.74707  | 101.7     | EVDEQMLNVQNK      |           |           |                 |                 |                   |
| 4        | 4        | 4  |             |                             | 751.883369 | 1501.752  | 2         |           | 1501.74707  |       | 1501.74707  | 87.88     | EVDEQMLNVQNK      |           |           |                 |                 |                   |
| 4        | 4        | 4  |             |                             | 617.657934 | 1849.952  | 3         |           | 1849.949265 |       | 1849.949265 | 42.11     | EIVHIQAGQCGNQIGAK |           |           |                 |                 |                   |
| 4        | 4        | 4  |             |                             | 617.657934 | 1849.952  | 3         |           | 1849.949265 |       | 1849.949265 | 44.69     | EIVHIQAGQCGNQIGAK |           |           |                 |                 |                   |
| 4        | 4        | 5  | IPI00025252 | Protein disulfide-isomerase | 377.266706 | 752.5189  | 2         | 2         | 2.38        | 0.06  | 752.518448  | 27.72     | GIVPLAK           |           |           |                 |                 |                   |
| 4        | 4        | 5  |             |                             | 453.263746 | 904.5129  | 2         |           | 904.515472  |       | 904.515472  | 38.78     | LNFAVASR          |           |           |                 |                 |                   |
| 4        | 4        | 5  |             |                             | 453.263746 | 904.5129  | 2         |           | 904.515472  |       | 904.515472  | 46.12     | LNFAVASR          |           |           |                 |                 |                   |
| 4        | 4        | 5  |             |                             | 453.264131 | 904.5137  | 2         |           | 904.515472  |       | 904.515472  | 45.48     | LNFAVASR          |           |           |                 |                 |                   |
| 4        | 4        | 5  |             |                             | 512.300503 | 1022.586  | 2         |           | 1022.589706 |       | 1022.589706 | 46.74     | QAGPASVPLR        |           |           |                 |                 |                   |
| 4        | 4        | 5  |             |                             | 512.300503 | 1022.586  | 2         |           | 1022.589706 |       | 1022.589706 | 53.36     | QAGPASVPLR        |           |           |                 |                 |                   |
| 4        | 4        | 5  |             |                             | 548.822494 | 1095.63   | 2         |           | 1095.631256 |       | 1095.631256 | 24.99     | TADGIVSHLK        |           |           |                 |                 |                   |
| 4        | 4        | 5  |             |                             | 570.818582 | 1139.623  | 2         |           | 1139.625092 |       | 1139.625092 | 35.04     | YGVSGYPTLK        |           |           |                 |                 |                   |
| 4        | 4        | 5  |             |                             | 570.818582 | 1139.623  | 2         |           | 1139.625092 |       | 1139.625092 | 29.01     | YGVSGYPTLK        |           |           |                 |                 |                   |
| 4        | 4        | 5  |             |                             | 600.788702 | 1199.563  | 2         |           | 1199.56691  |       | 1199.56691  | 30.53     | FVMQEEFSR         |           |           |                 |                 |                   |
| 4        | 4        | 5  |             |                             | 600.788711 | 1199.563  | 2         |           | 1199.56691  |       | 1199.56691  | 44.6      | FVMQEEFSR         |           |           |                 |                 |                   |
| 4        | 4        | 5  |             |                             | 600.789313 | 1199.564  | 2         |           | 1199.56691  |       | 1199.56691  | 35.39     | FVMQEEFSR         |           |           |                 |                 |                   |
| 4        | 4        | 5  |             |                             | 610.320461 | 1218.626  | 2         |           | 1218.626877 |       | 1218.626877 | 51.42     | LAPEYEAATR        | 610.3205  | 612.333   | 52.9            | 21.9            | 2.42              |
| 4        | 4        | 5  |             |                             | 610.320473 | 1218.626  | 2         |           | 1218.626877 |       | 1218.626877 | 39.21     | LAPEYEAATR        |           |           |                 |                 |                   |
| 4        | 4        | 5  |             |                             | 610.320473 | 1218.626  | 2         |           | 1218.626877 |       | 1218.626877 | 41.44     | LAPEYEAATR        |           |           |                 |                 |                   |
| 4        | 4        | 5  |             |                             | 698.855194 | 1395.696  | 2         |           | 1395.690598 |       | 1395.690598 | 41.69     | SEPIPESNDGPVK     |           |           |                 |                 |                   |
| 4        | 4        | 5  |             |                             | 712.871833 | 1423.729  | 2         |           | 1423.721909 |       | 1423.721909 | 47.83     | SEPIPESNDGPVK     | 712.8718  | 716.8969  | 2.01            | 0.86            | 2.34              |
| 4        | 4        | 5  |             |                             | 846.902468 | 1691.79   | 2         |           | 1691.784912 |       | 1691.784912 | 46.82     | MDATANDVPSPEYR    |           |           |                 |                 |                   |
| 4        | 4        | 5  |             |                             | 846.902468 | 1691.79   | 2         |           | 1691.784912 |       | 1691.784912 | 77.2      | MDATANDVPSPEYR    |           |           |                 |                 |                   |
| 4        | 4        | 5  |             |                             | 846.902468 | 1691.79   | 2         |           | 1691.784912 |       | 1691.784912 | 66.93     | MDATANDVPSPEYR    |           |           |                 |                 |                   |
| 4        | 4        | 5  |             |                             | 846.902468 | 1691.79   | 2         |           | 1691.784912 |       | 1691.784912 | 62.91     | MDATANDVPSPEYR    |           |           |                 |                 |                   |
| 4        | 4        | 5  |             |                             | 854.899866 | 1707.785  | 2         |           | 1707.779831 |       | 1707.779831 | 47.09     | MDATANDVPSPEYR    |           |           |                 |                 |                   |
| 4        | 4        | 5  |             |                             | 854.899866 | 1707.785  | 2         |           | 1707.779831 |       | 1707.779831 | 66.29     | MDATANDVPSPEYR    |           |           |                 |                 |                   |

| Band num | prot_hit | nu_prot_acc | prot_desc                    | pep_exp_mz | pep_exp_n | pep_exp_z | quantific | average | stdev | pep_calc_mr | pep_score | pep_seq                      | light m/z | heavy m/z | light intensity | heavy intensity | ratio light/heavy |
|----------|----------|-------------|------------------------------|------------|-----------|-----------|-----------|---------|-------|-------------|-----------|------------------------------|-----------|-----------|-----------------|-----------------|-------------------|
| 4        | 5        |             |                              | 854.899866 | 1707.785  | 2         |           |         |       | 1707.779831 | 27.25     | MDATANDVPSPEYEV              |           |           |                 |                 |                   |
| 4        | 5        | IPI00657680 | 55 kDa protein               | 377.266706 | 752.5189  | 2         | 2         | 2.38    | 0.06  | 752.518448  | 27.72     | GIVPLAK                      |           |           |                 |                 |                   |
| 4        | 5        |             |                              | 453.263746 | 904.5129  | 2         |           |         |       | 904.515472  | 38.78     | LNFVAVSR                     |           |           |                 |                 |                   |
| 4        | 5        |             |                              | 453.263746 | 904.5129  | 2         |           |         |       | 904.515472  | 46.12     | LNFVAVSR                     |           |           |                 |                 |                   |
| 4        | 5        |             |                              | 453.264131 | 904.5137  | 2         |           |         |       | 904.515472  | 45.48     | LNFVAVSR                     |           |           |                 |                 |                   |
| 4        | 5        |             |                              | 512.300503 | 1022.586  | 2         |           |         |       | 1022.589706 | 46.74     | QAGPASVPLR                   |           |           |                 |                 |                   |
| 4        | 5        |             |                              | 512.300503 | 1022.586  | 2         |           |         |       | 1022.589706 | 53.36     | QAGPASVPLR                   |           |           |                 |                 |                   |
| 4        | 5        |             |                              | 548.822494 | 1095.63   | 2         |           |         |       | 1095.631256 | 24.99     | TADGIVSHLK                   |           |           |                 |                 |                   |
| 4        | 5        |             |                              | 570.818582 | 1139.623  | 2         |           |         |       | 1139.625092 | 35.04     | YGVSGYPTLK                   |           |           |                 |                 |                   |
| 4        | 5        |             |                              | 570.818582 | 1139.623  | 2         |           |         |       | 1139.625092 | 29.01     | YGVSGYPTLK                   |           |           |                 |                 |                   |
| 4        | 5        |             |                              | 600.788702 | 1199.563  | 2         |           |         |       | 1199.566691 | 30.53     | FVMQEEFSR                    |           |           |                 |                 |                   |
| 4        | 5        |             |                              | 600.788711 | 1199.563  | 2         |           |         |       | 1199.566691 | 44.6      | FVMQEEFSR                    |           |           |                 |                 |                   |
| 4        | 5        |             |                              | 600.789313 | 1199.564  | 2         |           |         |       | 1199.566691 | 35.39     | FVMQEEFSR                    |           |           |                 |                 |                   |
| 4        | 5        |             |                              | 610.320461 | 1218.626  | 2         |           |         |       | 1218.626877 | 51.42     | LAPEYEAATR                   |           |           |                 |                 |                   |
| 4        | 5        |             |                              | 610.320473 | 1218.626  | 2         |           |         |       | 1218.626877 | 39.21     | LAPEYEAATR                   |           |           |                 |                 |                   |
| 4        | 5        |             |                              | 610.320473 | 1218.626  | 2         |           |         |       | 1218.626877 | 41.44     | LAPEYEAATR                   |           |           |                 |                 |                   |
| 4        | 5        |             |                              | 698.855194 | 1395.696  | 2         |           |         |       | 1395.690598 | 41.69     | SEPIPESNDGPVK                |           |           |                 |                 |                   |
| 4        | 5        |             |                              | 712.871833 | 1423.729  | 2         |           |         |       | 1423.721909 | 47.83     | SEPIPESNDGPVK                |           |           |                 |                 |                   |
| 4        | 5        |             |                              | 846.902468 | 1691.79   | 2         |           |         |       | 1691.784912 | 46.82     | MDATANDVPSPEYEV              |           |           |                 |                 |                   |
| 4        | 5        |             |                              | 846.902468 | 1691.79   | 2         |           |         |       | 1691.784912 | 77.2      | MDATANDVPSPEYEV              |           |           |                 |                 |                   |
| 4        | 5        |             |                              | 846.902468 | 1691.79   | 2         |           |         |       | 1691.784912 | 66.93     | MDATANDVPSPEYEV              |           |           |                 |                 |                   |
| 4        | 5        |             |                              | 846.902468 | 1691.79   | 2         |           |         |       | 1691.784912 | 62.91     | MDATANDVPSPEYEV              |           |           |                 |                 |                   |
| 4        | 5        |             |                              | 854.899866 | 1707.785  | 2         |           |         |       | 1707.779831 | 47.09     | MDATANDVPSPEYEV              |           |           |                 |                 |                   |
| 4        | 5        |             |                              | 854.899866 | 1707.785  | 2         |           |         |       | 1707.779831 | 66.29     | MDATANDVPSPEYEV              |           |           |                 |                 |                   |
| 4        | 5        |             |                              | 854.899866 | 1707.785  | 2         |           |         |       | 1707.779831 | 27.25     | MDATANDVPSPEYEV              |           |           |                 |                 |                   |
| 4        | 6        | IPI00299024 | Brain acid soluble protein 1 | 707.857579 | 1413.701  | 2         | 2         | 2.34    | 0.18  | 1413.701187 | 62.92     | ETPAATEAPSSTPK               | 707.8576  | 709.8701  | 4.65            | 1.88            | 2.47              |
| 4        | 6        |             |                              | 707.857579 | 1413.701  | 2         |           |         |       | 1413.701187 | 72.91     | ETPAATEAPSSTPK               |           |           |                 |                 |                   |
| 4        | 6        |             |                              | 707.857579 | 1413.701  | 2         |           |         |       | 1413.701187 | 73.88     | ETPAATEAPSSTPK               |           |           |                 |                 |                   |
| 4        | 6        |             |                              | 721.874295 | 1441.734  | 2         |           |         |       | 1441.732498 | 70.19     | ETPAATEAPSSTPK               |           |           |                 |                 |                   |
| 4        | 6        |             |                              | 721.874712 | 1441.735  | 2         |           |         |       | 1441.732498 | 48.47     | ETPAATEAPSSTPK               |           |           |                 |                 |                   |
| 4        | 6        |             |                              | 721.874721 | 1441.735  | 2         |           |         |       | 1441.732498 | 73.65     | ETPAATEAPSSTPK               |           |           |                 |                 |                   |
| 4        | 6        |             |                              | 490.271529 | 1467.793  | 3         |           |         |       | 1467.793289 | 36.14     | KTEAAPAAPAAQETK              |           |           |                 |                 |                   |
| 4        | 6        |             |                              | 490.271529 | 1467.793  | 3         |           |         |       | 1467.793289 | 27.72     | KTEAAPAAPAAQETK              |           |           |                 |                 |                   |
| 4        | 6        |             |                              | 742.366114 | 1482.718  | 2         |           |         |       | 1482.722626 | 62.67     | ESEPQAAAPAEAK                |           |           |                 |                 |                   |
| 4        | 6        |             |                              | 742.370593 | 1482.727  | 2         |           |         |       | 1482.722626 | 35.63     | ESEPQAAAPAEAK                |           |           |                 |                 |                   |
| 4        | 6        |             |                              | 499.615048 | 1495.823  | 3         |           |         |       | 1495.827057 | 20.05     | KTEAAPAAPAAQETK              | 499.6151  | 503.6402  | 0.62            | 0.28            | 2.21              |
| 4        | 6        |             |                              | 499.615048 | 1495.823  | 3         |           |         |       | 1495.827057 | 56.13     | KTEAAPAAPAAQETK              |           |           |                 |                 |                   |
| 4        | 6        |             |                              | 499.615048 | 1495.823  | 3         |           |         |       | 1495.827057 | 34.03     | KTEAAPAAPAAQETK              |           |           |                 |                 |                   |
| 4        | 6        |             |                              | 776.053473 | 2325.139  | 3         |           |         |       | 2325.160004 | 25.44     | AEPKKAPEQEQAAPGPAAGGEAPK     |           |           |                 |                 |                   |
| 4        | 6        |             |                              | 785.407288 | 2353.2    | 3         |           |         |       | 2353.193771 | 20.27     | AEPKKAPEQEQAAPGPAAGGEAPK     |           |           |                 |                 |                   |
| 4        | 6        |             |                              | 785.407288 | 2353.2    | 3         |           |         |       | 2353.193771 | 25.22     | AEPKKAPEQEQAAPGPAAGGEAPK     |           |           |                 |                 |                   |
| 4        | 6        |             |                              | 888.764522 | 2663.272  | 3         |           |         |       | 2663.258575 | 30.83     | AAEAAAAPAESAAPAAGEEPSKEEGEPK |           |           |                 |                 |                   |
| 4        | 6        |             |                              | 888.764522 | 2663.272  | 3         |           |         |       | 2663.258575 | 49.78     | AAEAAAAPAESAAPAAGEEPSKEEGEPK |           |           |                 |                 |                   |
| 4        | 6        |             |                              | 888.764522 | 2663.272  | 3         |           |         |       | 2663.258575 | 20.24     | AAEAAAAPAESAAPAAGEEPSKEEGEPK |           |           |                 |                 |                   |
| 4        | 6        |             |                              | 898.107999 | 2691.302  | 3         |           |         |       | 2691.289886 | 44.92     | AAEAAAAPAESAAPAAGEEPSKEEGEPK |           |           |                 |                 |                   |
| 4        | 6        |             |                              | 974.159932 | 2919.458  | 3         |           |         |       | 2919.448532 | 29.17     | AQGPAASAEPEKPVPAANSQDQTVTVKE |           |           |                 |                 |                   |
| 4        | 6        |             |                              | 974.159932 | 2919.458  | 3         |           |         |       | 2919.448532 | 29.87     | AQGPAASAEPEKPVPAANSQDQTVTVKE |           |           |                 |                 |                   |
| 4        | 7        | IPI00020599 | Calreticulin precursor       | 397.245692 | 792.4768  | 2         | 2         | 3.73    | 0.57  | 792.476974  | 26.06     | FVLSSGK                      |           |           |                 |                 |                   |
| 4        | 7        |             |                              | 397.245692 | 792.4768  | 2         |           |         |       | 792.476974  | 23.94     | FVLSSGK                      |           |           |                 |                 |                   |
| 4        | 7        |             |                              | 524.769725 | 1047.525  | 2         |           |         |       | 1047.526138 | 33.91     | QIDNPDYK                     |           |           |                 |                 |                   |
| 4        | 7        |             |                              | 524.76979  | 1047.525  | 2         |           |         |       | 1047.526138 | 24.27     | QIDNPDYK                     |           |           |                 |                 |                   |
| 4        | 7        |             |                              | 524.76979  | 1047.525  | 2         |           |         |       | 1047.526138 | 31.01     | QIDNPDYK                     |           |           |                 |                 |                   |
| 4        | 7        |             |                              | 719.836756 | 1437.659  | 2         |           |         |       | 1437.654892 | 65.13     | EQFLDGDGWTSR                 | 719.8368  | 721.8493  | 32.9            | 9.89            | 3.33              |
| 4        | 7        |             |                              | 719.836756 | 1437.659  | 2         |           |         |       | 1437.654892 | 66.1      | EQFLDGDGWTSR                 |           |           |                 |                 |                   |
| 4        | 7        |             |                              | 719.836756 | 1437.659  | 2         |           |         |       | 1437.654892 | 64.99     | EQFLDGDGWTSR                 |           |           |                 |                 |                   |
| 4        | 7        |             |                              | 752.850297 | 1503.686  | 2         |           |         |       | 1503.680038 | 51.72     | HEQNIDCGGGYVK                |           |           |                 |                 |                   |
| 4        | 7        |             |                              | 752.850297 | 1503.686  | 2         |           |         |       | 1503.680038 | 54.28     | HEQNIDCGGGYVK                |           |           |                 |                 |                   |
| 4        | 7        |             |                              | 511.577538 | 1531.711  | 3         |           |         |       | 1531.711349 | 43.86     | HEQNIDCGGGYVK                |           |           |                 |                 |                   |
| 4        | 7        |             |                              | 766.863174 | 1531.712  | 2         |           |         |       | 1531.711349 | 49.11     | HEQNIDCGGGYVK                | 766.8665  | 770.8916  | 0.95            | 0.23            | 4.13              |
| 4        | 7        |             |                              | 766.863174 | 1531.712  | 2         |           |         |       | 1531.711349 | 57.15     | HEQNIDCGGGYVK                |           |           |                 |                 |                   |
| 4        | 7        |             |                              | 766.865229 | 1531.716  | 2         |           |         |       | 1531.711349 | 55.41     | HEQNIDCGGGYVK                |           |           |                 |                 |                   |
| 4        | 7        |             |                              | 766.866505 | 1531.718  | 2         |           |         |       | 1531.711349 | 49.11     | HEQNIDCGGGYVK                |           |           |                 |                 |                   |
| 4        | 7        |             |                              | 766.866505 | 1531.718  | 2         |           |         |       | 1531.711349 | 57.15     | HEQNIDCGGGYVK                |           |           |                 |                 |                   |

| Band num | prot_hit_nu | prot_acc    | prot_desc                  | pep_exp_mz | pep_exp_n | pep_exp_z | quantific | average | stdev | pep_calc_mr | pep_score | pep_seq         | light m/z | heavy m/z | light intensity | heavy intensity | ratio light/heavy |
|----------|-------------|-------------|----------------------------|------------|-----------|-----------|-----------|---------|-------|-------------|-----------|-----------------|-----------|-----------|-----------------|-----------------|-------------------|
| 4        | 7           |             |                            | 628.9844   | 1883.931  | 3         |           |         |       | 1883.92897  | 20.14     | IKDPDASKPEDWDER |           |           |                 |                 |                   |
| 4        | 8           | IPI00220644 | isoform M1 of Pyruvate kin | 434.786248 | 867.5579  | 2         | 3         | 4.06    | 2.02  | 867.556625  | 40.47     | APIIAVTR        |           |           |                 |                 |                   |
| 4        | 8           |             |                            | 434.786248 | 867.5579  | 2         |           |         |       | 867.556625  | 32.72     | APIIAVTR        |           |           |                 |                 |                   |
| 4        | 8           |             |                            | 524.27777  | 1046.541  | 2         |           |         |       | 1046.542084 | 57.12     | GDYPLEAVR       | 524.2778  | 526.2903  | 24.1            | 7.27            | 3.31              |
| 4        | 8           |             |                            | 524.27777  | 1046.541  | 2         |           |         |       | 1046.542084 | 64.08     | GDYPLEAVR       |           |           |                 |                 |                   |
| 4        | 8           |             |                            | 585.325649 | 1168.637  | 2         |           |         |       | 1168.636368 | 77.93     | GDLGIEIPAEK     | 585.3257  | 587.3382  | 5.77            | 2.3             | 2.51              |
| 4        | 8           |             |                            | 585.325649 | 1168.637  | 2         |           |         |       | 1168.636368 | 78        | GDLGIEIPAEK     |           |           |                 |                 |                   |
| 4        | 8           |             |                            | 599.341957 | 1196.669  | 2         |           |         |       | 1196.667679 | 68.03     | GDLGIEIPAEK     |           |           |                 |                 |                   |
| 4        | 8           |             |                            | 613.312562 | 1224.611  | 2         |           |         |       | 1224.608459 | 21.19     | ITLDNAYMEK      |           |           |                 |                 |                   |
| 4        | 8           |             |                            | 613.344247 | 1224.674  | 2         |           |         |       | 1224.673859 | 40.64     | LDIDSPITAR      |           |           |                 |                 |                   |
| 4        | 8           |             |                            | 613.344247 | 1224.674  | 2         |           |         |       | 1224.673859 | 41.71     | LDIDSPITAR      |           |           |                 |                 |                   |
| 4        | 8           |             |                            | 613.344252 | 1224.674  | 2         |           |         |       | 1224.673859 | 40.21     | LDIDSPITAR      |           |           |                 |                 |                   |
| 4        | 8           |             |                            | 627.325181 | 1252.636  | 2         |           |         |       | 1252.639771 | 24.12     | ITLDNAYMEK      |           |           |                 |                 |                   |
| 4        | 8           |             |                            | 694.374163 | 1386.734  | 2         |           |         |       | 1386.731369 | 58.31     | NTGIICTIGPASR   | 694.3742  | 696.3867  | 14.6            | 2.3             | 6.35              |
| 4        | 8           |             |                            | 694.374163 | 1386.734  | 2         |           |         |       | 1386.731369 | 59.32     | NTGIICTIGPASR   |           |           |                 |                 |                   |
| 4        | 8           |             |                            | 694.374163 | 1386.734  | 2         |           |         |       | 1386.731369 | 58.6      | NTGIICTIGPASR   |           |           |                 |                 |                   |
| 4        | 8           | IPI00479186 | pyruvate kinase 3 isoform  | 434.786248 | 867.5579  | 2         | 3         | 4.06    | 2.02  | 867.556625  | 40.47     | APIIAVTR        |           |           |                 |                 |                   |
| 4        | 8           |             |                            | 434.786248 | 867.5579  | 2         |           |         |       | 867.556625  | 32.72     | APIIAVTR        |           |           |                 |                 |                   |
| 4        | 8           |             |                            | 524.27777  | 1046.541  | 2         |           |         |       | 1046.542084 | 57.12     | GDYPLEAVR       |           |           |                 |                 |                   |
| 4        | 8           |             |                            | 524.27777  | 1046.541  | 2         |           |         |       | 1046.542084 | 64.08     | GDYPLEAVR       |           |           |                 |                 |                   |
| 4        | 8           |             |                            | 585.325649 | 1168.637  | 2         |           |         |       | 1168.636368 | 77.93     | GDLGIEIPAEK     |           |           |                 |                 |                   |
| 4        | 8           |             |                            | 585.325649 | 1168.637  | 2         |           |         |       | 1168.636368 | 78        | GDLGIEIPAEK     |           |           |                 |                 |                   |
| 4        | 8           |             |                            | 599.341957 | 1196.669  | 2         |           |         |       | 1196.667679 | 68.03     | GDLGIEIPAEK     |           |           |                 |                 |                   |
| 4        | 8           |             |                            | 613.312562 | 1224.611  | 2         |           |         |       | 1224.608459 | 21.19     | ITLDNAYMEK      |           |           |                 |                 |                   |
| 4        | 8           |             |                            | 613.344247 | 1224.674  | 2         |           |         |       | 1224.673859 | 40.64     | LDIDSPITAR      |           |           |                 |                 |                   |
| 4        | 8           |             |                            | 613.344247 | 1224.674  | 2         |           |         |       | 1224.673859 | 41.71     | LDIDSPITAR      |           |           |                 |                 |                   |
| 4        | 8           |             |                            | 613.344252 | 1224.674  | 2         |           |         |       | 1224.673859 | 40.21     | LDIDSPITAR      |           |           |                 |                 |                   |
| 4        | 8           |             |                            | 627.325181 | 1252.636  | 2         |           |         |       | 1252.639771 | 24.12     | ITLDNAYMEK      |           |           |                 |                 |                   |
| 4        | 8           |             |                            | 694.374163 | 1386.734  | 2         |           |         |       | 1386.731369 | 58.31     | NTGIICTIGPASR   |           |           |                 |                 |                   |
| 4        | 8           |             |                            | 694.374163 | 1386.734  | 2         |           |         |       | 1386.731369 | 59.32     | NTGIICTIGPASR   |           |           |                 |                 |                   |
| 4        | 8           |             |                            | 694.374163 | 1386.734  | 2         |           |         |       | 1386.731369 | 58.6      | NTGIICTIGPASR   |           |           |                 |                 |                   |
| 4        | 8           | IPI00783061 | 58 kDa protein             | 434.786248 | 867.5579  | 2         | 3         | 4.06    | 2.02  | 867.556625  | 40.47     | APIIAVTR        |           |           |                 |                 |                   |
| 4        | 8           |             |                            | 434.786248 | 867.5579  | 2         |           |         |       | 867.556625  | 32.72     | APIIAVTR        |           |           |                 |                 |                   |
| 4        | 8           |             |                            | 524.27777  | 1046.541  | 2         |           |         |       | 1046.542084 | 57.12     | GDYPLEAVR       |           |           |                 |                 |                   |
| 4        | 8           |             |                            | 524.27777  | 1046.541  | 2         |           |         |       | 1046.542084 | 64.08     | GDYPLEAVR       |           |           |                 |                 |                   |
| 4        | 8           |             |                            | 585.325649 | 1168.637  | 2         |           |         |       | 1168.636368 | 77.93     | GDLGIEIPAEK     |           |           |                 |                 |                   |
| 4        | 8           |             |                            | 585.325649 | 1168.637  | 2         |           |         |       | 1168.636368 | 78        | GDLGIEIPAEK     |           |           |                 |                 |                   |
| 4        | 8           |             |                            | 599.341957 | 1196.669  | 2         |           |         |       | 1196.667679 | 68.03     | GDLGIEIPAEK     |           |           |                 |                 |                   |
| 4        | 8           |             |                            | 613.312562 | 1224.611  | 2         |           |         |       | 1224.608459 | 21.19     | ITLDNAYMEK      |           |           |                 |                 |                   |
| 4        | 8           |             |                            | 613.344247 | 1224.674  | 2         |           |         |       | 1224.673859 | 40.64     | LDIDSPITAR      |           |           |                 |                 |                   |
| 4        | 8           |             |                            | 613.344247 | 1224.674  | 2         |           |         |       | 1224.673859 | 41.71     | LDIDSPITAR      |           |           |                 |                 |                   |
| 4        | 8           |             |                            | 613.344252 | 1224.674  | 2         |           |         |       | 1224.673859 | 40.21     | LDIDSPITAR      |           |           |                 |                 |                   |
| 4        | 8           |             |                            | 627.325181 | 1252.636  | 2         |           |         |       | 1252.639771 | 24.12     | ITLDNAYMEK      |           |           |                 |                 |                   |
| 4        | 8           |             |                            | 694.374163 | 1386.734  | 2         |           |         |       | 1386.731369 | 58.31     | NTGIICTIGPASR   |           |           |                 |                 |                   |
| 4        | 8           |             |                            | 694.374163 | 1386.734  | 2         |           |         |       | 1386.731369 | 59.32     | NTGIICTIGPASR   |           |           |                 |                 |                   |
| 4        | 8           |             |                            | 694.374163 | 1386.734  | 2         |           |         |       | 1386.731369 | 58.6      | NTGIICTIGPASR   |           |           |                 |                 |                   |
| 4        | 8           | IPI00784179 | 58 kDa protein             | 434.786248 | 867.5579  | 2         | 3         | 4.06    | 2.02  | 867.556625  | 40.47     | APIIAVTR        |           |           |                 |                 |                   |
| 4        | 8           |             |                            | 434.786248 | 867.5579  | 2         |           |         |       | 867.556625  | 32.72     | APIIAVTR        |           |           |                 |                 |                   |
| 4        | 8           |             |                            | 524.27777  | 1046.541  | 2         |           |         |       | 1046.542084 | 57.12     | GDYPLEAVR       |           |           |                 |                 |                   |
| 4        | 8           |             |                            | 524.27777  | 1046.541  | 2         |           |         |       | 1046.542084 | 64.08     | GDYPLEAVR       |           |           |                 |                 |                   |
| 4        | 8           |             |                            | 585.325649 | 1168.637  | 2         |           |         |       | 1168.636368 | 77.93     | GDLGIEIPAEK     |           |           |                 |                 |                   |
| 4        | 8           |             |                            | 585.325649 | 1168.637  | 2         |           |         |       | 1168.636368 | 78        | GDLGIEIPAEK     |           |           |                 |                 |                   |
| 4        | 8           |             |                            | 599.341957 | 1196.669  | 2         |           |         |       | 1196.667679 | 68.03     | GDLGIEIPAEK     |           |           |                 |                 |                   |
| 4        | 8           |             |                            | 613.312562 | 1224.611  | 2         |           |         |       | 1224.608459 | 21.19     | ITLDNAYMEK      |           |           |                 |                 |                   |
| 4        | 8           |             |                            | 613.344247 | 1224.674  | 2         |           |         |       | 1224.673859 | 40.64     | LDIDSPITAR      |           |           |                 |                 |                   |
| 4        | 8           |             |                            | 613.344247 | 1224.674  | 2         |           |         |       | 1224.673859 | 41.71     | LDIDSPITAR      |           |           |                 |                 |                   |
| 4        | 8           |             |                            | 613.344252 | 1224.674  | 2         |           |         |       | 1224.673859 | 40.21     | LDIDSPITAR      |           |           |                 |                 |                   |
| 4        | 8           |             |                            | 627.325181 | 1252.636  | 2         |           |         |       | 1252.639771 | 24.12     | ITLDNAYMEK      |           |           |                 |                 |                   |
| 4        | 8           |             |                            | 694.374163 | 1386.734  | 2         |           |         |       | 1386.731369 | 58.31     | NTGIICTIGPASR   |           |           |                 |                 |                   |
| 4        | 8           |             |                            | 694.374163 | 1386.734  | 2         |           |         |       | 1386.731369 | 59.32     | NTGIICTIGPASR   |           |           |                 |                 |                   |
| 4        | 8           |             |                            | 694.374163 | 1386.734  | 2         |           |         |       | 1386.731369 | 58.6      | NTGIICTIGPASR   |           |           |                 |                 |                   |
| 4        | 9           | IPI00011200 | D-3-phosphoglycerate deh   | 564.325396 | 1126.636  | 2         | 2         | 3.03    | 0.21  | 1126.637024 | 72.74     | GGIVDEGALLR     | 564.3254  | 566.338   | 7.82            | 2.71            | 2.89              |
| 4        | 9           |             |                            | 564.325396 | 1126.636  | 2         |           |         |       | 1126.637024 | 67.4      | GGIVDEGALLR     |           |           |                 |                 |                   |

| Band num | prot_hit | nu          | prot_acc | prot_desc                     | pep_exp_mz | pep_exp_n | pep_exp_z | quantific | average | stdev | pep_calc_mr | pep_score | pep_seq             | light m/z | heavy m/z | light intensity | heavy intensity | ratio light/heavy |
|----------|----------|-------------|----------|-------------------------------|------------|-----------|-----------|-----------|---------|-------|-------------|-----------|---------------------|-----------|-----------|-----------------|-----------------|-------------------|
| 4        | 9        |             |          |                               | 731.856661 | 1461.699  | 2         |           |         |       | 1461.698044 | 48.16     | VLISDSLDPCCR        |           |           |                 |                 |                   |
| 4        | 9        |             |          |                               | 731.856661 | 1461.699  | 2         |           |         |       | 1461.698044 | 34.38     | VLISDSLDPCCR        |           |           |                 |                 |                   |
| 4        | 9        |             |          |                               | 758.887184 | 1515.76   | 2         |           |         |       | 1515.75531  | 112.27    | AGTGVNDVLEAAATR     | 758.8872  | 760.8997  | 4.07            | 1.28            | 3.18              |
| 4        | 9        |             |          |                               | 758.887184 | 1515.76   | 2         |           |         |       | 1515.75531  | 119       | AGTGVNDVLEAAATR     |           |           |                 |                 |                   |
| 4        | 9        |             |          |                               | 526.775454 | 2103.073  | 4         |           |         |       | 2103.080704 | 38.3      | ALVDHENVISCPhLGASTK |           |           |                 |                 |                   |
| 4        | 9        |             |          |                               | 526.775454 | 2103.073  | 4         |           |         |       | 2103.080704 | 20.35     | ALVDHENVISCPhLGASTK |           |           |                 |                 |                   |
| 4        | 10       | IPI00465248 |          | enolase 1                     | 417.745823 | 833.4771  | 2         | 3         | 21.91   | 7.96  | 833.478378  |           | 20.23 YNQLLR        |           |           |                 |                 |                   |
| 4        | 10       |             |          |                               | 478.3134   | 954.6122  | 2         |           |         |       | 954.613815  | 31.5      | TIAPALVSK           | 478.3134  | 432.3385  | 5.3             | 0.41            | 12.93             |
| 4        | 10       |             |          |                               | 478.3134   | 954.6122  | 2         |           |         |       | 954.613815  | 30.71     | TIAPALVSK           |           |           |                 |                 |                   |
| 4        | 10       |             |          |                               | 532.286472 | 1062.558  | 2         |           |         |       | 1062.559036 | 26.05     | SCNCLLLK            |           |           |                 |                 |                   |
| 4        | 10       |             |          |                               | 400.564848 | 1198.673  | 3         |           |         |       | 1198.673431 | 31.08     | IGAEVYHNLK          | 400.5648  | 403.2483  | 9.55            | 0.34            | 28.09             |
| 4        | 10       |             |          |                               | 831.434269 | 1660.854  | 2         |           |         |       | 1660.847839 | 100.57    | VNQIGSVTESLQACK     |           |           |                 |                 |                   |
| 4        | 10       |             |          |                               | 831.434269 | 1660.854  | 2         |           |         |       | 1660.847839 | 57.52     | VNQIGSVTESLQACK     |           |           |                 |                 |                   |
| 4        | 10       |             |          |                               | 845.449112 | 1688.884  | 2         |           |         |       | 1688.87915  | 84.28     | VNQIGSVTESLQACK     | 845.4491  | 849.4742  | 2.47            | 0.1             | 24.70             |
| 4        | 10       |             |          |                               | 845.449112 | 1688.884  | 2         |           |         |       | 1688.87915  | 110.9     | VNQIGSVTESLQACK     |           |           |                 |                 |                   |
| 4        | 10       |             |          |                               | 845.449112 | 1688.884  | 2         |           |         |       | 1688.87915  | 43.68     | VNQIGSVTESLQACK     |           |           |                 |                 |                   |
| 4        | 11       | IPI00010796 |          | Protein disulfide-isomerase   | 547.777681 | 1093.541  | 2         | 3         | 2.59    | 0.45  | 1093.542816 | 35.55     | TVIDYNGER           | 547.7777  | 549.7902  | 5.4             | 1.99            | 2.71              |
| 4        | 11       |             |          |                               | 547.777681 | 1093.541  | 2         |           |         |       | 1093.542816 | 30.62     | TVIDYNGER           |           |           |                 |                 |                   |
| 4        | 11       |             |          |                               | 503.258884 | 1506.755  | 3         |           |         |       | 1506.759018 | 35.02     | YKPESEELTAER        | 503.2589  | 505.9423  | 1.84            | 0.62            | 2.97              |
| 4        | 11       |             |          |                               | 904.942145 | 1807.87   | 2         |           |         |       | 1807.861237 | 117.42    | VDATEESDLAQYGVV     | 904.9422  | 906.9547  | 8.87            | 4.22            | 2.10              |
| 4        | 11       |             |          |                               | 904.942145 | 1807.87   | 2         |           |         |       | 1807.861237 | 109.42    | VDATEESDLAQYGVV     |           |           |                 |                 |                   |
| 4        | 11       |             |          |                               | 904.942145 | 1807.87   | 2         |           |         |       | 1807.861237 | 113.31    | VDATEESDLAQYGVV     |           |           |                 |                 |                   |
| 4        | 12       | IPI00554648 |          | Keratin, type II cytoskeletal | 449.735026 | 897.4555  | 2         | 2         | 2.03    | 0.74  | 897.458038  |           | 20.45 ISSSFSR       |           |           |                 |                 |                   |
| 4        | 12       |             |          |                               | 514.803962 | 1027.593  | 2         |           |         |       | 1027.593781 | 22.4      | LQAEIEGLK           |           |           |                 |                 |                   |
| 4        | 12       |             |          |                               | 528.819293 | 1055.624  | 2         |           |         |       | 1055.625092 | 25.2      | LQAEIEGLK           |           |           |                 |                 |                   |
| 4        | 12       |             |          |                               | 528.819293 | 1055.624  | 2         |           |         |       | 1055.625092 | 36.47     | LQAEIEGLK           |           |           |                 |                 |                   |
| 4        | 12       |             |          |                               | 531.285668 | 1060.557  | 2         |           |         |       | 1060.547211 | 27.43     | QDMARQLR            |           |           |                 |                 |                   |
| 4        | 12       |             |          |                               | 554.2763   | 1106.538  | 2         |           |         |       | 1106.538071 | 38.9      | AQYEDIANR           |           |           |                 |                 |                   |
| 4        | 12       |             |          |                               | 554.2763   | 1106.538  | 2         |           |         |       | 1106.538071 | 53.13     | AQYEDIANR           |           |           |                 |                 |                   |
| 4        | 12       |             |          |                               | 579.330888 | 1156.647  | 2         |           |         |       | 1156.647614 | 54.31     | LSELEAALQR          | 579.3309  | 581.3434  | 43              | 28.4            | 1.51              |
| 4        | 12       |             |          |                               | 579.330905 | 1156.647  | 2         |           |         |       | 1156.647614 | 52.83     | LSELEAALQR          |           |           |                 |                 |                   |
| 4        | 12       |             |          |                               | 583.310365 | 1164.606  | 2         |           |         |       | 1164.605072 | 31.85     | YEELQSLAGK          |           |           |                 |                 |                   |
| 4        | 12       |             |          |                               | 597.325604 | 1192.637  | 2         |           |         |       | 1192.636383 | 41.49     | YEELQSLAGK          |           |           |                 |                 |                   |
| 4        | 12       |             |          |                               | 597.325604 | 1192.637  | 2         |           |         |       | 1192.636383 | 46.07     | YEELQSLAGK          |           |           |                 |                 |                   |
| 4        | 12       |             |          |                               | 601.339666 | 1200.665  | 2         |           |         |       | 1200.662598 | 43.56     | LVSESSDVLPK         |           |           |                 |                 |                   |
| 4        | 12       |             |          |                               | 601.339666 | 1200.665  | 2         |           |         |       | 1200.662598 | 32.02     | LVSESSDVLPK         |           |           |                 |                 |                   |
| 4        | 12       |             |          |                               | 601.340649 | 1200.667  | 2         |           |         |       | 1200.662598 | 43.56     | LVSESSDVLPK         |           |           |                 |                 |                   |
| 4        | 12       |             |          |                               | 615.35569  | 1228.697  | 2         |           |         |       | 1228.693909 | 41.76     | LVSESSDVLPK         |           |           |                 |                 |                   |
| 4        | 12       |             |          |                               | 615.35569  | 1228.697  | 2         |           |         |       | 1228.693909 | 42.23     | LVSESSDVLPK         |           |           |                 |                 |                   |
| 4        | 12       |             |          |                               | 686.859751 | 1371.705  | 2         |           |         |       | 1371.701828 | 98.69     | ASLEAAIADAEQR       | 686.8598  | 688.8723  | 16              | 6.26            | 2.56              |
| 4        | 12       |             |          |                               | 686.859751 | 1371.705  | 2         |           |         |       | 1371.701828 | 80.17     | ASLEAAIADAEQR       |           |           |                 |                 |                   |
| 4        | 13       | IPI00440493 |          | ATP synthase subunit alpha    | 514.809292 | 1027.604  | 2         | 2         | 5.38    | 1.14  | 1027.605011 | 42.4      | VLSIGDGIAR          | 514.8094  | 516.822   | 29              | 4.69            | 6.18              |
| 4        | 13       |             |          |                               | 514.809441 | 1027.604  | 2         |           |         |       | 1027.605011 | 48.67     | VLSIGDGIAR          |           |           |                 |                 |                   |
| 4        | 13       |             |          |                               | 527.81724  | 1053.62   | 2         |           |         |       | 1053.620667 | 60.66     | AVDSLVPGR           | 527.8172  | 529.8298  | 12.9            | 2.82            | 4.57              |
| 4        | 13       |             |          |                               | 802.416303 | 1602.818  | 2         |           |         |       | 1602.8125   | 87.39     | ILGADTSVDLEETGR     |           |           |                 |                 |                   |
| 4        | 13       |             |          |                               | 802.416303 | 1602.818  | 2         |           |         |       | 1602.8125   | 64.73     | ILGADTSVDLEETGR     |           |           |                 |                 |                   |
| 4        | 13       |             |          |                               | 802.416421 | 1602.818  | 2         |           |         |       | 1602.8125   | 93.95     | ILGADTSVDLEETGR     |           |           |                 |                 |                   |
| 4        | 13       | IPI00471928 |          | 18 kDa protein                | 514.809292 | 1027.604  | 2         | 2         | 5.38    | 1.14  | 1027.605011 | 42.4      | VLSIGDGIAR          |           |           |                 |                 |                   |
| 4        | 13       |             |          |                               | 514.809441 | 1027.604  | 2         |           |         |       | 1027.605011 | 48.67     | VLSIGDGIAR          |           |           |                 |                 |                   |
| 4        | 13       |             |          |                               | 527.81724  | 1053.62   | 2         |           |         |       | 1053.620667 | 60.66     | AVDSLVPGR           |           |           |                 |                 |                   |
| 4        | 13       |             |          |                               | 802.416303 | 1602.818  | 2         |           |         |       | 1602.8125   | 87.39     | ILGADTSVDLEETGR     |           |           |                 |                 |                   |
| 4        | 13       |             |          |                               | 802.416303 | 1602.818  | 2         |           |         |       | 1602.8125   | 64.73     | ILGADTSVDLEETGR     |           |           |                 |                 |                   |
| 4        | 13       |             |          |                               | 802.416421 | 1602.818  | 2         |           |         |       | 1602.8125   | 93.95     | ILGADTSVDLEETGR     |           |           |                 |                 |                   |
| 4        | 13       | IPI00549805 |          | 23 kDa protein                | 514.809292 | 1027.604  | 2         | 2         | 5.38    | 1.14  | 1027.605011 | 42.4      | VLSIGDGIAR          |           |           |                 |                 |                   |
| 4        | 13       |             |          |                               | 514.809441 | 1027.604  | 2         |           |         |       | 1027.605011 | 48.67     | VLSIGDGIAR          |           |           |                 |                 |                   |
| 4        | 13       |             |          |                               | 527.81724  | 1053.62   | 2         |           |         |       | 1053.620667 | 60.66     | AVDSLVPGR           |           |           |                 |                 |                   |
| 4        | 13       |             |          |                               | 802.416303 | 1602.818  | 2         |           |         |       | 1602.8125   | 87.39     | ILGADTSVDLEETGR     |           |           |                 |                 |                   |
| 4        | 13       |             |          |                               | 802.416303 | 1602.818  | 2         |           |         |       | 1602.8125   | 64.73     | ILGADTSVDLEETGR     |           |           |                 |                 |                   |
| 4        | 13       |             |          |                               | 802.416421 | 1602.818  | 2         |           |         |       | 1602.8125   | 93.95     | ILGADTSVDLEETGR     |           |           |                 |                 |                   |
| 4        | 14       | IPI00027497 |          | Glucose-6-phosphate isom      | 842.428928 | 1682.843  | 2         | 1         | 1.65    | 1.00  | 1682.838745 | 86.76     | TFTTQETITNAETAK     | 842.4289  | 844.4415  | 2.31            | 1.4             | 1.65              |
| 4        | 14       |             |          |                               | 842.428928 | 1682.843  | 2         |           |         |       | 1682.838745 | 94.68     | TFTTQETITNAETAK     |           |           |                 |                 |                   |
| 4        | 14       |             |          |                               | 842.428928 | 1682.843  | 2         |           |         |       | 1682.838745 | 76.71     | TFTTQETITNAETAK     |           |           |                 |                 |                   |
| 4        | 14       |             |          |                               | 856.444419 | 1710.874  | 2         |           |         |       | 1710.870056 | 58.27     | TFTTQETITNAETAK     |           |           |                 |                 |                   |



| Band num | prot_hit_nu | prot_acc    | prot_desc                   | pep_exp_mz | pep_exp_n | pep_exp_z | quantific | average | stdev | pep_calc_mr | pep_score   | pep_seq        | light m/z      | heavy m/z | light intensity | heavy intensity | ratio light/heavy |      |  |
|----------|-------------|-------------|-----------------------------|------------|-----------|-----------|-----------|---------|-------|-------------|-------------|----------------|----------------|-----------|-----------------|-----------------|-------------------|------|--|
| 4        | 15          | IPI00180675 | Tubulin alpha-3 chain       | 419.240208 | 836.4659  | 2         | 2         | 5.38    | 1.23  | 836.466812  | 23.25       | LSVDYGK        |                |           |                 |                 |                   |      |  |
| 4        | 15          |             |                             | 419.240208 | 836.4659  | 2         |           |         |       |             | 836.466812  | 31.05          | LSVDYGK        |           |                 |                 |                   |      |  |
| 4        | 15          |             |                             | 472.251911 | 942.4893  | 2         |           |         |       |             | 942.490921  | 21.23          | FDLMYAK        |           |                 |                 |                   |      |  |
| 4        | 15          |             |                             | 522.309666 | 1042.605  | 2         |           |         |       |             | 1042.604691 | 44.37          | DVNAAIATIK     |           |                 |                 |                   |      |  |
| 4        | 15          |             |                             | 522.30971  | 1042.605  | 2         |           |         |       |             | 1042.604691 | 37.71          | DVNAAIATIK     |           |                 |                 |                   |      |  |
| 4        | 15          |             |                             | 536.322692 | 1070.631  | 2         |           |         |       |             | 1070.636002 | 55.79          | DVNAAIATIK     | 536.3233  | 540.8484        | 7.07            | 1.13              | 6.26 |  |
| 4        | 15          |             |                             | 536.3233   | 1070.632  | 2         |           |         |       |             | 1070.636002 | 66.04          | DVNAAIATIK     |           |                 |                 |                   |      |  |
| 4        | 15          |             |                             | 639.297866 | 1276.581  | 2         |           |         |       |             | 1276.579102 | 46.61          | YMACLLYR       |           |                 |                 |                   |      |  |
| 4        | 15          |             |                             | 639.297877 | 1276.581  | 2         |           |         |       |             | 1276.579102 | 33.89          | YMACLLYR       | 639.2979  | 641.3104        | 17.6            | 3.9               | 4.51 |  |
| 4        | 15          |             |                             | 639.297877 | 1276.581  | 2         |           |         |       |             | 1276.579102 | 22.41          | YMACLLYR       |           |                 |                 |                   |      |  |
| 4        | 15          |             |                             | 647.295492 | 1292.576  | 2         |           |         |       |             | 1292.57402  | 25.81          | YMACLLYR       |           |                 |                 |                   |      |  |
| 4        | 15          |             |                             | 480.273066 | 1437.797  | 3         |           |         |       |             | 1437.80043  | 35.4           | QLFHPEQLITGK   |           |                 |                 |                   |      |  |
| 4        | 15          |             |                             | 480.273066 | 1437.797  | 3         |           |         |       |             | 1437.80043  | 31.38          | QLFHPEQLITGK   |           |                 |                 |                   |      |  |
| 4        | 15          |             |                             | 489.617308 | 1465.83   | 3         |           |         |       |             | 1465.831741 | 31.9           | QLFHPEQLITGK   |           |                 |                 |                   |      |  |
| 4        | 15          |             |                             | 582.976561 | 1745.908  | 3         |           |         |       |             | 1745.908478 | 24.53          | NLDIERPTYTNLNR |           |                 |                 |                   |      |  |
| 4        | 15          |             | 873.964014                  | 1745.913   | 2         |           |           |         |       | 1745.908478 | 42.28       | NLDIERPTYTNLNR |                |           |                 |                 |                   |      |  |
| 4        | 15          | IPI00218343 | Tubulin alpha-6 chain       | 419.240208 | 836.4659  | 2         | 2         | 5.38    | 1.23  | 836.466812  | 23.25       | LSVDYGK        |                |           |                 |                 |                   |      |  |
| 4        | 15          |             |                             | 419.240208 | 836.4659  | 2         |           |         |       |             | 836.466812  | 31.05          | LSVDYGK        |           |                 |                 |                   |      |  |
| 4        | 15          |             |                             | 472.251911 | 942.4893  | 2         |           |         |       |             | 942.490921  | 21.23          | FDLMYAK        |           |                 |                 |                   |      |  |
| 4        | 15          |             |                             | 522.309666 | 1042.605  | 2         |           |         |       |             | 1042.604691 | 44.37          | DVNAAIATIK     |           |                 |                 |                   |      |  |
| 4        | 15          |             |                             | 522.30971  | 1042.605  | 2         |           |         |       |             | 1042.604691 | 37.71          | DVNAAIATIK     |           |                 |                 |                   |      |  |
| 4        | 15          |             |                             | 536.322692 | 1070.631  | 2         |           |         |       |             | 1070.636002 | 55.79          | DVNAAIATIK     |           |                 |                 |                   |      |  |
| 4        | 15          |             |                             | 536.3233   | 1070.632  | 2         |           |         |       |             | 1070.636002 | 66.04          | DVNAAIATIK     |           |                 |                 |                   |      |  |
| 4        | 15          |             |                             | 639.297866 | 1276.581  | 2         |           |         |       |             | 1276.579102 | 46.61          | YMACLLYR       |           |                 |                 |                   |      |  |
| 4        | 15          |             |                             | 639.297877 | 1276.581  | 2         |           |         |       |             | 1276.579102 | 33.89          | YMACLLYR       |           |                 |                 |                   |      |  |
| 4        | 15          |             |                             | 639.297877 | 1276.581  | 2         |           |         |       |             | 1276.579102 | 22.41          | YMACLLYR       |           |                 |                 |                   |      |  |
| 4        | 15          |             |                             | 647.295492 | 1292.576  | 2         |           |         |       |             | 1292.57402  | 25.81          | YMACLLYR       |           |                 |                 |                   |      |  |
| 4        | 15          |             |                             | 480.273066 | 1437.797  | 3         |           |         |       |             | 1437.80043  | 35.4           | QLFHPEQLITGK   |           |                 |                 |                   |      |  |
| 4        | 15          |             |                             | 480.273066 | 1437.797  | 3         |           |         |       |             | 1437.80043  | 31.38          | QLFHPEQLITGK   |           |                 |                 |                   |      |  |
| 4        | 15          |             |                             | 489.617308 | 1465.83   | 3         |           |         |       |             | 1465.831741 | 31.9           | QLFHPEQLITGK   |           |                 |                 |                   |      |  |
| 4        | 15          |             |                             | 582.976561 | 1745.908  | 3         |           |         |       |             | 1745.908478 | 24.53          | NLDIERPTYTNLNR |           |                 |                 |                   |      |  |
| 4        | 15          |             | 873.964014                  | 1745.913   | 2         |           |           |         |       | 1745.908478 | 42.28       | NLDIERPTYTNLNR |                |           |                 |                 |                   |      |  |
| 4        | 15          | IPI00387144 | Tubulin alpha-ubiquitous cl | 419.240208 | 836.4659  | 2         | 2         | 5.38    | 1.23  | 836.466812  | 23.25       | LSVDYGK        |                |           |                 |                 |                   |      |  |
| 4        | 15          |             |                             | 419.240208 | 836.4659  | 2         |           |         |       |             | 836.466812  | 31.05          | LSVDYGK        |           |                 |                 |                   |      |  |
| 4        | 15          |             |                             | 472.251911 | 942.4893  | 2         |           |         |       |             | 942.490921  | 21.23          | FDLMYAK        |           |                 |                 |                   |      |  |
| 4        | 15          |             |                             | 522.309666 | 1042.605  | 2         |           |         |       |             | 1042.604691 | 44.37          | DVNAAIATIK     |           |                 |                 |                   |      |  |
| 4        | 15          |             |                             | 522.30971  | 1042.605  | 2         |           |         |       |             | 1042.604691 | 37.71          | DVNAAIATIK     |           |                 |                 |                   |      |  |
| 4        | 15          |             |                             | 536.322692 | 1070.631  | 2         |           |         |       |             | 1070.636002 | 55.79          | DVNAAIATIK     |           |                 |                 |                   |      |  |
| 4        | 15          |             |                             | 536.3233   | 1070.632  | 2         |           |         |       |             | 1070.636002 | 66.04          | DVNAAIATIK     |           |                 |                 |                   |      |  |
| 4        | 15          |             |                             | 639.297866 | 1276.581  | 2         |           |         |       |             | 1276.579102 | 46.61          | YMACLLYR       |           |                 |                 |                   |      |  |
| 4        | 15          |             |                             | 639.297877 | 1276.581  | 2         |           |         |       |             | 1276.579102 | 33.89          | YMACLLYR       |           |                 |                 |                   |      |  |
| 4        | 15          |             |                             | 639.297877 | 1276.581  | 2         |           |         |       |             | 1276.579102 | 22.41          | YMACLLYR       |           |                 |                 |                   |      |  |
| 4        | 15          |             |                             | 647.295492 | 1292.576  | 2         |           |         |       |             | 1292.57402  | 25.81          | YMACLLYR       |           |                 |                 |                   |      |  |
| 4        | 15          |             |                             | 480.273066 | 1437.797  | 3         |           |         |       |             | 1437.80043  | 35.4           | QLFHPEQLITGK   |           |                 |                 |                   |      |  |
| 4        | 15          |             |                             | 480.273066 | 1437.797  | 3         |           |         |       |             | 1437.80043  | 31.38          | QLFHPEQLITGK   |           |                 |                 |                   |      |  |
| 4        | 15          |             |                             | 489.617308 | 1465.83   | 3         |           |         |       |             | 1465.831741 | 31.9           | QLFHPEQLITGK   |           |                 |                 |                   |      |  |
| 4        | 15          |             |                             | 582.976561 | 1745.908  | 3         |           |         |       |             | 1745.908478 | 24.53          | NLDIERPTYTNLNR |           |                 |                 |                   |      |  |
| 4        | 15          |             | 873.964014                  | 1745.913   | 2         |           |           |         |       | 1745.908478 | 42.28       | NLDIERPTYTNLNR |                |           |                 |                 |                   |      |  |
| 4        | 15          | IPI00478908 | 50 kDa protein              | 419.240208 | 836.4659  | 2         | 2         | 5.38    | 1.23  | 836.466812  | 23.25       | LSVDYGK        |                |           |                 |                 |                   |      |  |
| 4        | 15          |             |                             | 419.240208 | 836.4659  | 2         |           |         |       |             | 836.466812  | 31.05          | LSVDYGK        |           |                 |                 |                   |      |  |
| 4        | 15          |             |                             | 472.251911 | 942.4893  | 2         |           |         |       |             | 942.490921  | 21.23          | FDLMYAK        |           |                 |                 |                   |      |  |
| 4        | 15          |             |                             | 522.309666 | 1042.605  | 2         |           |         |       |             | 1042.604691 | 44.37          | DVNAAIATIK     |           |                 |                 |                   |      |  |
| 4        | 15          |             |                             | 522.30971  | 1042.605  | 2         |           |         |       |             | 1042.604691 | 37.71          | DVNAAIATIK     |           |                 |                 |                   |      |  |
| 4        | 15          |             |                             | 536.322692 | 1070.631  | 2         |           |         |       |             | 1070.636002 | 55.79          | DVNAAIATIK     |           |                 |                 |                   |      |  |
| 4        | 15          |             |                             | 536.3233   | 1070.632  | 2         |           |         |       |             | 1070.636002 | 66.04          | DVNAAIATIK     |           |                 |                 |                   |      |  |
| 4        | 15          |             |                             | 639.297866 | 1276.581  | 2         |           |         |       |             | 1276.579102 | 46.61          | YMACLLYR       |           |                 |                 |                   |      |  |
| 4        | 15          |             |                             | 639.297877 | 1276.581  | 2         |           |         |       |             | 1276.579102 | 33.89          | YMACLLYR       |           |                 |                 |                   |      |  |
| 4        | 15          |             |                             | 639.297877 | 1276.581  | 2         |           |         |       |             | 1276.579102 | 22.41          | YMACLLYR       |           |                 |                 |                   |      |  |
| 4        | 15          |             |                             | 647.295492 | 1292.576  | 2         |           |         |       |             | 1292.57402  | 25.81          | YMACLLYR       |           |                 |                 |                   |      |  |
| 4        | 15          |             |                             | 480.273066 | 1437.797  | 3         |           |         |       |             | 1437.80043  | 35.4           | QLFHPEQLITGK   |           |                 |                 |                   |      |  |
| 4        | 15          |             |                             | 480.273066 | 1437.797  | 3         |           |         |       |             | 1437.80043  | 31.38          | QLFHPEQLITGK   |           |                 |                 |                   |      |  |
| 4        | 15          |             |                             | 489.617308 | 1465.83   | 3         |           |         |       |             | 1465.831741 | 31.9           | QLFHPEQLITGK   |           |                 |                 |                   |      |  |
| 4        | 15          |             |                             | 582.976561 | 1745.908  | 3         |           |         |       |             | 1745.908478 | 24.53          | NLDIERPTYTNLNR |           |                 |                 |                   |      |  |

| Band num | prot_hit_nu | prot_acc    | prot_desc                   | pep_exp_mz | pep_exp_n | pep_exp_z | quantific | average | stdev | pep_calc_mr | pep_score | pep_seq                   | light m/z | heavy m/z | light intensity | heavy intensity | ratio light/heavy |
|----------|-------------|-------------|-----------------------------|------------|-----------|-----------|-----------|---------|-------|-------------|-----------|---------------------------|-----------|-----------|-----------------|-----------------|-------------------|
| 4        | 15          |             |                             | 873.964014 | 1745.913  | 2         |           |         |       | 1745.908478 | 42.28     | NLDIERPTYTNLNR            |           |           |                 |                 |                   |
| 4        | 16          | IPI00472102 | Heat shock protein 60       | 442.254275 | 882.494   | 2         | 2         | 2.60    | 0.22  | 882.494736  | 53.09     | GANPVEIR                  | 442.2543  | 444.2668  | 9.35            | 2.11            | 4.43              |
| 4        | 16          |             |                             | 470.812576 | 939.6106  | 2         |           |         |       | 939.614105  | 21.67     | VGLQVVAVK                 |           |           |                 |                 |                   |
| 4        | 16          |             |                             | 479.303259 | 956.592   | 2         |           |         |       | 956.593063  | 33.7      | LSDGVAVLK                 |           |           |                 |                 |                   |
| 4        | 16          |             |                             | 484.828463 | 967.6424  | 2         |           |         |       | 967.645416  | 28.34     | VGLQVVAVK                 |           |           |                 |                 |                   |
| 4        | 16          |             |                             | 494.775146 | 987.5357  | 2         |           |         |       | 987.537354  | 21.24     | VTDALNATR                 |           |           |                 |                 |                   |
| 4        | 16          |             |                             | 645.334235 | 1288.654  | 2         |           |         |       | 1288.653473 | 41.9      | VGGTSDVEVNEK              |           |           |                 |                 |                   |
| 4        | 16          |             |                             | 645.334235 | 1288.654  | 2         |           |         |       | 1288.653473 | 28.15     | VGGTSDVEVNEK              |           |           |                 |                 |                   |
| 4        | 16          |             |                             | 686.88183  | 1371.749  | 2         |           |         |       | 1371.742249 | 58.86     | TVIEQSWGSPK               | 686.8818  | 688.8944  | 1.98            | 0.81            | 2.44              |
| 4        | 16          |             |                             | 863.436212 | 2587.287  | 3         |           |         |       | 2587.274948 | 66.63     | LVQDVANNNTNEEAGDGTATVTLAR | 863.4362  | 864.7779  | 7.31            | 2.65            | 2.76              |
| 4        | 16          |             |                             | 863.436212 | 2587.287  | 3         |           |         |       | 2587.274948 | 53.33     | LVQDVANNNTNEEAGDGTATVTLAR |           |           |                 |                 |                   |
| 4        | 16          | IPI00784154 | 60 kDa heat shock protein,  | 442.254275 | 882.494   | 2         | 2         | 2.60    | 0.22  | 882.494736  | 53.09     | GANPVEIR                  |           |           |                 |                 |                   |
| 4        | 16          |             |                             | 470.812576 | 939.6106  | 2         |           |         |       | 939.614105  | 21.67     | VGLQVVAVK                 |           |           |                 |                 |                   |
| 4        | 16          |             |                             | 479.303259 | 956.592   | 2         |           |         |       | 956.593063  | 33.7      | LSDGVAVLK                 |           |           |                 |                 |                   |
| 4        | 16          |             |                             | 484.828463 | 967.6424  | 2         |           |         |       | 967.645416  | 28.34     | VGLQVVAVK                 |           |           |                 |                 |                   |
| 4        | 16          |             |                             | 494.775146 | 987.5357  | 2         |           |         |       | 987.537354  | 21.24     | VTDALNATR                 |           |           |                 |                 |                   |
| 4        | 16          |             |                             | 645.334235 | 1288.654  | 2         |           |         |       | 1288.653473 | 41.9      | VGGTSDVEVNEK              |           |           |                 |                 |                   |
| 4        | 16          |             |                             | 645.334235 | 1288.654  | 2         |           |         |       | 1288.653473 | 28.15     | VGGTSDVEVNEK              |           |           |                 |                 |                   |
| 4        | 16          |             |                             | 686.88183  | 1371.749  | 2         |           |         |       | 1371.742249 | 58.86     | TVIEQSWGSPK               |           |           |                 |                 |                   |
| 4        | 16          |             |                             | 863.436212 | 2587.287  | 3         |           |         |       | 2587.274948 | 66.63     | LVQDVANNNTNEEAGDGTATVTLAR |           |           |                 |                 |                   |
| 4        | 16          |             |                             | 863.436212 | 2587.287  | 3         |           |         |       | 2587.274948 | 53.33     | LVQDVANNNTNEEAGDGTATVTLAR |           |           |                 |                 |                   |
| 4        | 17          | IPI00000634 | Coiled-coil domain-contain  | 476.274118 | 950.5337  | 2         | 3         | 7.10    | 2.73  | 950.534897  | 26.99     | IELETYK                   |           |           |                 |                 |                   |
| 4        | 17          |             |                             | 530.811709 | 1059.609  | 2         |           |         |       | 1059.610092 | 56.76     | SGIVISPFPR                | 530.8117  | 532.8243  | 19.2            | 3.1             | 6.19              |
| 4        | 17          |             |                             | 598.787141 | 1195.56   | 2         |           |         |       | 1195.556747 | 31.41     | MAQYLEEER                 | 598.7871  | 600.7997  | 5.62            | 1.14            | 4.93              |
| 4        | 17          |             |                             | 598.787141 | 1195.56   | 2         |           |         |       | 1195.556747 | 46.06     | MAQYLEEER                 |           |           |                 |                 |                   |
| 4        | 17          |             |                             | 598.787141 | 1195.56   | 2         |           |         |       | 1195.556747 | 51.36     | MAQYLEEER                 |           |           |                 |                 |                   |
| 4        | 17          |             |                             | 532.936825 | 1595.789  | 3         |           |         |       | 1595.790253 | 21.85     | YFNEMSAQGLRPR             |           |           |                 |                 |                   |
| 4        | 17          |             |                             | 538.268698 | 1611.784  | 3         |           |         |       | 1611.785172 | 21.17     | YFNEMSAQGLRPR             |           |           |                 |                 |                   |
| 4        | 17          |             |                             | 856.374695 | 1710.735  | 2         |           |         |       | 1710.728729 | 31.2      | DISMEIDSPENMMR            |           |           |                 |                 |                   |
| 4        | 17          |             |                             | 864.371508 | 1726.728  | 2         |           |         |       | 1726.723648 | 59.3      | DISMEIDSPENMMR            | 864.3715  | 866.3841  | 1.22            | 0.12            | 10.17             |
| 4        | 17          |             |                             | 864.371508 | 1726.728  | 2         |           |         |       | 1726.723648 | 33.53     | DISMEIDSPENMMR            |           |           |                 |                 |                   |
| 4        | 17          |             |                             | 891.894495 | 1781.774  | 2         |           |         |       | 1781.764969 | 21.87     | QLSESESSLEMDDER           |           |           |                 |                 |                   |
| 4        | 18          | IPI00216919 | YAP1 protein                | 502.265115 | 1002.516  | 2         | 2         | 10.64   | 2.57  | 1002.515915 | 22.33     | TTSWLDLPR                 |           |           |                 |                 |                   |
| 4        | 18          |             |                             | 621.338845 | 1240.663  | 2         |           |         |       | 1240.662231 | 35.31     | TANVPQTVPMR               | 621.339   | 623.3515  | 70.5            | 5.66            | 12.46             |
| 4        | 18          |             |                             | 621.338988 | 1240.663  | 2         |           |         |       | 1240.662231 | 41.97     | TANVPQTVPMR               |           |           |                 |                 |                   |
| 4        | 18          |             |                             | 923.416877 | 1844.819  | 2         |           |         |       | 1844.812256 | 67.68     | DESTDSGLSMSSYSVPR         | 923.4169  | 925.4294  | 1.5             | 0.17            | 8.82              |
| 4        | 18          |             |                             | 923.416877 | 1844.819  | 2         |           |         |       | 1844.812256 | 79.94     | DESTDSGLSMSSYSVPR         |           |           |                 |                 |                   |
| 4        | 19          | IPI00383751 | CALRETICULIN=CALCIUM        | 455.258287 | 908.502   | 2         | 1         | 4.29    | 0.00  | 908.503189  | 27.19     | EPAVYFK                   | 455.2583  | 459.2834  | 21.1            | 4.92            | 4.29              |
| 4        | 19          |             |                             | 524.769725 | 1047.525  | 2         |           |         |       | 1047.526138 | 33.91     | QIDNPDYK                  |           |           |                 |                 |                   |
| 4        | 19          |             |                             | 524.76979  | 1047.525  | 2         |           |         |       | 1047.526138 | 24.27     | QIDNPDYK                  |           |           |                 |                 |                   |
| 4        | 19          |             |                             | 524.76979  | 1047.525  | 2         |           |         |       | 1047.526138 | 31.01     | QIDNPDYK                  |           |           |                 |                 |                   |
| 4        | 19          |             |                             | 719.836756 | 1437.659  | 2         |           |         |       | 1437.654892 | 65.13     | EQFLDGDGWTSR              |           |           |                 |                 |                   |
| 4        | 19          |             |                             | 719.836756 | 1437.659  | 2         |           |         |       | 1437.654892 | 66.1      | EQFLDGDGWTSR              |           |           |                 |                 |                   |
| 4        | 19          |             |                             | 719.836756 | 1437.659  | 2         |           |         |       | 1437.654892 | 64.99     | EQFLDGDGWTSR              |           |           |                 |                 |                   |
| 4        | 20          | IPI00152418 | Decay-accelerating factor 5 | 477.734637 | 953.4547  | 2         | 3         | 3.98    | 0.46  | 953.455261  | 24.97     | CEESFVK                   |           |           |                 |                 |                   |
| 4        | 20          |             |                             | 485.286554 | 968.5586  | 2         |           |         |       | 968.567932  | 20.59     | REPSLSPK                  |           |           |                 |                 |                   |
| 4        | 20          |             |                             | 323.860614 | 968.56    | 3         |           |         |       | 968.567932  | 21.34     | REPSLSPK                  |           |           |                 |                 |                   |
| 4        | 20          |             |                             | 509.292485 | 1016.57   | 2         |           |         |       | 1016.571304 | 20.74     | LTCLQNLK                  |           |           |                 |                 |                   |
| 4        | 20          |             |                             | 523.308361 | 1044.602  | 2         |           |         |       | 1044.602615 | 36.86     | LTCLQNLK                  | 523.3084  | 527.3335  | 29.4            | 6.81            | 4.32              |
| 4        | 20          |             |                             | 523.308366 | 1044.602  | 2         |           |         |       | 1044.602615 | 37.78     | LTCLQNLK                  |           |           |                 |                 |                   |
| 4        | 20          |             |                             | 523.308366 | 1044.602  | 2         |           |         |       | 1044.602615 | 37.48     | LTCLQNLK                  |           |           |                 |                 |                   |
| 4        | 20          |             |                             | 529.258514 | 1056.502  | 2         |           |         |       | 1056.504669 | 25.04     | SCPNPGEIR                 |           |           |                 |                 |                   |
| 4        | 20          |             |                             | 529.258522 | 1056.502  | 2         |           |         |       | 1056.504669 | 28        | SCPNPGEIR                 |           |           |                 |                 |                   |
| 4        | 20          |             |                             | 529.25865  | 1056.503  | 2         |           |         |       | 1056.504669 | 27.64     | SCPNPGEIR                 |           |           |                 |                 |                   |
| 4        | 20          |             |                             | 529.25865  | 1056.503  | 2         |           |         |       | 1056.504669 | 32.59     | SCPNPGEIR                 |           |           |                 |                 |                   |
| 4        | 20          |             |                             | 578.279773 | 1154.545  | 2         |           |         |       | 1154.545471 | 42.03     | WSTAVEFCK                 | 578.2798  | 580.2923  | 2.58            | 0.62            | 4.16              |
| 4        | 20          |             |                             | 389.536897 | 1165.589  | 3         |           |         |       | 1165.590469 | 21.74     | HFHETTPNK                 |           |           |                 |                 |                   |
| 4        | 20          |             |                             | 592.295719 | 1182.577  | 2         |           |         |       | 1182.576782 | 27.39     | WSTAVEFCK                 |           |           |                 |                 |                   |
| 4        | 20          |             |                             | 592.295719 | 1182.577  | 2         |           |         |       | 1182.576782 | 25.12     | WSTAVEFCK                 |           |           |                 |                 |                   |
| 4        | 20          |             |                             | 728.88461  | 1455.755  | 2         |           |         |       | 1455.752167 | 48.53     | TSFPEDTVITYK              | 728.8846  | 732.9097  | 5.45            | 1.58            | 3.45              |
| 4        | 20          |             |                             | 728.88461  | 1455.755  | 2         |           |         |       | 1455.752167 | 45.46     | TSFPEDTVITYK              |           |           |                 |                 |                   |
| 4        | 20          |             |                             | 728.88461  | 1455.755  | 2         |           |         |       | 1455.752167 | 57.65     | TSFPEDTVITYK              |           |           |                 |                 |                   |
| 4        | 20          | IPI00216550 | Isoform 1 of Complement c   | 477.734637 | 953.4547  | 2         | 3         | 3.98    | 0.46  | 953.455261  | 24.97     | CEESFVK                   |           |           |                 |                 |                   |

| Band num | prot_hit_nu | prot_acc    | prot_desc                   | pep_exp_mz | pep_exp_n | pep_exp_z | quantific | average | stdev | pep_calc_mr | pep_score | pep_seq      | light m/z | heavy m/z | light intensity | heavy intensity | ratio light/heavy |
|----------|-------------|-------------|-----------------------------|------------|-----------|-----------|-----------|---------|-------|-------------|-----------|--------------|-----------|-----------|-----------------|-----------------|-------------------|
| 4        | 20          |             |                             | 485.286554 | 968.5586  | 2         |           |         |       | 968.567932  | 20.59     | REPSLSPK     |           |           |                 |                 |                   |
| 4        | 20          |             |                             | 323.860614 | 968.56    | 3         |           |         |       | 968.567932  | 21.34     | REPSLSPK     |           |           |                 |                 |                   |
| 4        | 20          |             |                             | 509.292485 | 1016.57   | 2         |           |         |       | 1016.571304 | 20.74     | LTCLQNLK     |           |           |                 |                 |                   |
| 4        | 20          |             |                             | 523.308361 | 1044.602  | 2         |           |         |       | 1044.602615 | 36.66     | LTCLQNLK     |           |           |                 |                 |                   |
| 4        | 20          |             |                             | 523.308366 | 1044.602  | 2         |           |         |       | 1044.602615 | 37.78     | LTCLQNLK     |           |           |                 |                 |                   |
| 4        | 20          |             |                             | 523.308366 | 1044.602  | 2         |           |         |       | 1044.602615 | 37.48     | LTCLQNLK     |           |           |                 |                 |                   |
| 4        | 20          |             |                             | 529.258514 | 1056.502  | 2         |           |         |       | 1056.504669 | 25.04     | SCPMPGEIR    |           |           |                 |                 |                   |
| 4        | 20          |             |                             | 529.258522 | 1056.502  | 2         |           |         |       | 1056.504669 | 28        | SCPMPGEIR    |           |           |                 |                 |                   |
| 4        | 20          |             |                             | 529.25865  | 1056.503  | 2         |           |         |       | 1056.504669 | 27.64     | SCPMPGEIR    |           |           |                 |                 |                   |
| 4        | 20          |             |                             | 529.25865  | 1056.503  | 2         |           |         |       | 1056.504669 | 32.59     | SCPMPGEIR    |           |           |                 |                 |                   |
| 4        | 20          |             |                             | 578.279773 | 1154.545  | 2         |           |         |       | 1154.545471 | 42.03     | WSTAVEFCK    |           |           |                 |                 |                   |
| 4        | 20          |             |                             | 389.536897 | 1165.589  | 3         |           |         |       | 1165.590469 | 21.74     | HFHETTPNK    |           |           |                 |                 |                   |
| 4        | 20          |             |                             | 592.295719 | 1182.577  | 2         |           |         |       | 1182.576782 | 27.39     | WSTAVEFCK    |           |           |                 |                 |                   |
| 4        | 20          |             |                             | 592.295719 | 1182.577  | 2         |           |         |       | 1182.576782 | 25.12     | WSTAVEFCK    |           |           |                 |                 |                   |
| 4        | 20          |             |                             | 728.88461  | 1455.755  | 2         |           |         |       | 1455.752167 | 48.53     | TSFPEDTVITYK |           |           |                 |                 |                   |
| 4        | 20          |             |                             | 728.88461  | 1455.755  | 2         |           |         |       | 1455.752167 | 45.46     | TSFPEDTVITYK |           |           |                 |                 |                   |
| 4        | 20          |             |                             | 728.88461  | 1455.755  | 2         |           |         |       | 1455.752167 | 57.65     | TSFPEDTVITYK |           |           |                 |                 |                   |
| 4        | 20          | IPI00292069 | Isoform 2 of Complement c   | 477.734637 | 953.4547  | 2         | 3         | 3.98    | 0.46  | 953.455261  | 24.97     | CEESFVK      |           |           |                 |                 |                   |
| 4        | 20          |             |                             | 485.286554 | 968.5586  | 2         |           |         |       | 968.567932  | 20.59     | REPSLSPK     |           |           |                 |                 |                   |
| 4        | 20          |             |                             | 323.860614 | 968.56    | 3         |           |         |       | 968.567932  | 21.34     | REPSLSPK     |           |           |                 |                 |                   |
| 4        | 20          |             |                             | 509.292485 | 1016.57   | 2         |           |         |       | 1016.571304 | 20.74     | LTCLQNLK     |           |           |                 |                 |                   |
| 4        | 20          |             |                             | 523.308361 | 1044.602  | 2         |           |         |       | 1044.602615 | 36.66     | LTCLQNLK     |           |           |                 |                 |                   |
| 4        | 20          |             |                             | 523.308366 | 1044.602  | 2         |           |         |       | 1044.602615 | 37.78     | LTCLQNLK     |           |           |                 |                 |                   |
| 4        | 20          |             |                             | 523.308366 | 1044.602  | 2         |           |         |       | 1044.602615 | 37.48     | LTCLQNLK     |           |           |                 |                 |                   |
| 4        | 20          |             |                             | 529.258514 | 1056.502  | 2         |           |         |       | 1056.504669 | 25.04     | SCPMPGEIR    |           |           |                 |                 |                   |
| 4        | 20          |             |                             | 529.258522 | 1056.502  | 2         |           |         |       | 1056.504669 | 28        | SCPMPGEIR    |           |           |                 |                 |                   |
| 4        | 20          |             |                             | 529.25865  | 1056.503  | 2         |           |         |       | 1056.504669 | 27.64     | SCPMPGEIR    |           |           |                 |                 |                   |
| 4        | 20          |             |                             | 529.25865  | 1056.503  | 2         |           |         |       | 1056.504669 | 32.59     | SCPMPGEIR    |           |           |                 |                 |                   |
| 4        | 20          |             |                             | 578.279773 | 1154.545  | 2         |           |         |       | 1154.545471 | 42.03     | WSTAVEFCK    |           |           |                 |                 |                   |
| 4        | 20          |             |                             | 389.536897 | 1165.589  | 3         |           |         |       | 1165.590469 | 21.74     | HFHETTPNK    |           |           |                 |                 |                   |
| 4        | 20          |             |                             | 592.295719 | 1182.577  | 2         |           |         |       | 1182.576782 | 27.39     | WSTAVEFCK    |           |           |                 |                 |                   |
| 4        | 20          |             |                             | 592.295719 | 1182.577  | 2         |           |         |       | 1182.576782 | 25.12     | WSTAVEFCK    |           |           |                 |                 |                   |
| 4        | 20          |             |                             | 728.88461  | 1455.755  | 2         |           |         |       | 1455.752167 | 48.53     | TSFPEDTVITYK |           |           |                 |                 |                   |
| 4        | 20          |             |                             | 728.88461  | 1455.755  | 2         |           |         |       | 1455.752167 | 45.46     | TSFPEDTVITYK |           |           |                 |                 |                   |
| 4        | 20          |             |                             | 728.88461  | 1455.755  | 2         |           |         |       | 1455.752167 | 57.65     | TSFPEDTVITYK |           |           |                 |                 |                   |
| 4        | 20          | IPI00382926 | Decay-accelerating factor c | 477.734637 | 953.4547  | 2         | 3         | 3.98    | 0.46  | 953.455261  | 24.97     | CEESFVK      |           |           |                 |                 |                   |
| 4        | 20          |             |                             | 485.286554 | 968.5586  | 2         |           |         |       | 968.567932  | 20.59     | REPSLSPK     |           |           |                 |                 |                   |
| 4        | 20          |             |                             | 323.860614 | 968.56    | 3         |           |         |       | 968.567932  | 21.34     | REPSLSPK     |           |           |                 |                 |                   |
| 4        | 20          |             |                             | 509.292485 | 1016.57   | 2         |           |         |       | 1016.571304 | 20.74     | LTCLQNLK     |           |           |                 |                 |                   |
| 4        | 20          |             |                             | 523.308361 | 1044.602  | 2         |           |         |       | 1044.602615 | 36.66     | LTCLQNLK     |           |           |                 |                 |                   |
| 4        | 20          |             |                             | 523.308366 | 1044.602  | 2         |           |         |       | 1044.602615 | 37.78     | LTCLQNLK     |           |           |                 |                 |                   |
| 4        | 20          |             |                             | 523.308366 | 1044.602  | 2         |           |         |       | 1044.602615 | 37.48     | LTCLQNLK     |           |           |                 |                 |                   |
| 4        | 20          |             |                             | 529.258514 | 1056.502  | 2         |           |         |       | 1056.504669 | 25.04     | SCPMPGEIR    |           |           |                 |                 |                   |
| 4        | 20          |             |                             | 529.258522 | 1056.502  | 2         |           |         |       | 1056.504669 | 28        | SCPMPGEIR    |           |           |                 |                 |                   |
| 4        | 20          |             |                             | 529.25865  | 1056.503  | 2         |           |         |       | 1056.504669 | 27.64     | SCPMPGEIR    |           |           |                 |                 |                   |
| 4        | 20          |             |                             | 529.25865  | 1056.503  | 2         |           |         |       | 1056.504669 | 32.59     | SCPMPGEIR    |           |           |                 |                 |                   |
| 4        | 20          |             |                             | 578.279773 | 1154.545  | 2         |           |         |       | 1154.545471 | 42.03     | WSTAVEFCK    |           |           |                 |                 |                   |
| 4        | 20          |             |                             | 389.536897 | 1165.589  | 3         |           |         |       | 1165.590469 | 21.74     | HFHETTPNK    |           |           |                 |                 |                   |
| 4        | 20          |             |                             | 592.295719 | 1182.577  | 2         |           |         |       | 1182.576782 | 27.39     | WSTAVEFCK    |           |           |                 |                 |                   |
| 4        | 20          |             |                             | 592.295719 | 1182.577  | 2         |           |         |       | 1182.576782 | 25.12     | WSTAVEFCK    |           |           |                 |                 |                   |
| 4        | 20          |             |                             | 728.88461  | 1455.755  | 2         |           |         |       | 1455.752167 | 48.53     | TSFPEDTVITYK |           |           |                 |                 |                   |
| 4        | 20          |             |                             | 728.88461  | 1455.755  | 2         |           |         |       | 1455.752167 | 45.46     | TSFPEDTVITYK |           |           |                 |                 |                   |
| 4        | 20          |             |                             | 728.88461  | 1455.755  | 2         |           |         |       | 1455.752167 | 57.65     | TSFPEDTVITYK |           |           |                 |                 |                   |
| 4        | 20          | IPI00647119 | Decay accelerating factor f | 477.734637 | 953.4547  | 2         | 3         | 3.98    | 0.46  | 953.455261  | 24.97     | CEESFVK      |           |           |                 |                 |                   |
| 4        | 20          |             |                             | 485.286554 | 968.5586  | 2         |           |         |       | 968.567932  | 20.59     | REPSLSPK     |           |           |                 |                 |                   |
| 4        | 20          |             |                             | 323.860614 | 968.56    | 3         |           |         |       | 968.567932  | 21.34     | REPSLSPK     |           |           |                 |                 |                   |
| 4        | 20          |             |                             | 509.292485 | 1016.57   | 2         |           |         |       | 1016.571304 | 20.74     | LTCLQNLK     |           |           |                 |                 |                   |
| 4        | 20          |             |                             | 523.308361 | 1044.602  | 2         |           |         |       | 1044.602615 | 36.66     | LTCLQNLK     |           |           |                 |                 |                   |
| 4        | 20          |             |                             | 523.308366 | 1044.602  | 2         |           |         |       | 1044.602615 | 37.78     | LTCLQNLK     |           |           |                 |                 |                   |
| 4        | 20          |             |                             | 523.308366 | 1044.602  | 2         |           |         |       | 1044.602615 | 37.48     | LTCLQNLK     |           |           |                 |                 |                   |
| 4        | 20          |             |                             | 529.258514 | 1056.502  | 2         |           |         |       | 1056.504669 | 25.04     | SCPMPGEIR    |           |           |                 |                 |                   |
| 4        | 20          |             |                             | 529.258522 | 1056.502  | 2         |           |         |       | 1056.504669 | 28        | SCPMPGEIR    |           |           |                 |                 |                   |
| 4        | 20          |             |                             | 529.25865  | 1056.503  | 2         |           |         |       | 1056.504669 | 27.64     | SCPMPGEIR    |           |           |                 |                 |                   |

| Band num | prot_hit_nu | prot_acc    | prot_desc                     | pep_exp_mz | pep_exp_n | pep_exp_z | quantific | average | stdev | pep_calc_mr | pep_score | pep_seq         | light m/z | heavy m/z | light intensity | heavy intensity | ratio light/heavy |
|----------|-------------|-------------|-------------------------------|------------|-----------|-----------|-----------|---------|-------|-------------|-----------|-----------------|-----------|-----------|-----------------|-----------------|-------------------|
| 4        | 20          |             |                               | 529.25865  | 1056.503  | 2         |           |         |       | 1056.504669 | 32.59     | SCPNPGEIR       |           |           |                 |                 |                   |
| 4        | 20          |             |                               | 578.279773 | 1154.545  | 2         |           |         |       | 1154.545471 | 42.03     | WSTAVEFCK       |           |           |                 |                 |                   |
| 4        | 20          |             |                               | 389.536897 | 1165.589  | 3         |           |         |       | 1165.590469 | 21.74     | HFHETTPNK       |           |           |                 |                 |                   |
| 4        | 20          |             |                               | 592.295719 | 1182.577  | 2         |           |         |       | 1182.576782 | 27.39     | WSTAVEFCK       |           |           |                 |                 |                   |
| 4        | 20          |             |                               | 592.295719 | 1182.577  | 2         |           |         |       | 1182.576782 | 25.12     | WSTAVEFCK       |           |           |                 |                 |                   |
| 4        | 20          |             |                               | 728.88461  | 1455.755  | 2         |           |         |       | 1455.752167 | 48.53     | TSFPEDTVITYK    |           |           |                 |                 |                   |
| 4        | 20          |             |                               | 728.88461  | 1455.755  | 2         |           |         |       | 1455.752167 | 45.46     | TSFPEDTVITYK    |           |           |                 |                 |                   |
| 4        | 20          |             |                               | 728.88461  | 1455.755  | 2         |           |         |       | 1455.752167 | 57.65     | TSFPEDTVITYK    |           |           |                 |                 |                   |
| 4        | 20          | IPI00783145 | Decay-accelerating factor 5   | 477.734637 | 953.4547  | 2         | 3         | 3.98    | 0.46  | 953.455261  | 24.97     | CEESFVK         |           |           |                 |                 |                   |
| 4        | 20          |             |                               | 485.286554 | 968.5586  | 2         |           |         |       | 968.567932  | 20.59     | REPSLSPK        |           |           |                 |                 |                   |
| 4        | 20          |             |                               | 323.860614 | 968.56    | 3         |           |         |       | 968.567932  | 21.34     | REPSLSPK        |           |           |                 |                 |                   |
| 4        | 20          |             |                               | 509.292485 | 1016.57   | 2         |           |         |       | 1016.571304 | 20.74     | LTCLQNLK        |           |           |                 |                 |                   |
| 4        | 20          |             |                               | 523.308361 | 1044.602  | 2         |           |         |       | 1044.602615 | 36.66     | LTCLQNLK        |           |           |                 |                 |                   |
| 4        | 20          |             |                               | 523.308366 | 1044.602  | 2         |           |         |       | 1044.602615 | 37.78     | LTCLQNLK        |           |           |                 |                 |                   |
| 4        | 20          |             |                               | 523.308366 | 1044.602  | 2         |           |         |       | 1044.602615 | 37.48     | LTCLQNLK        |           |           |                 |                 |                   |
| 4        | 20          |             |                               | 529.258514 | 1056.502  | 2         |           |         |       | 1056.504669 | 25.04     | SCPNPGEIR       |           |           |                 |                 |                   |
| 4        | 20          |             |                               | 529.258522 | 1056.502  | 2         |           |         |       | 1056.504669 | 28        | SCPNPGEIR       |           |           |                 |                 |                   |
| 4        | 20          |             |                               | 529.25865  | 1056.503  | 2         |           |         |       | 1056.504669 | 27.64     | SCPNPGEIR       |           |           |                 |                 |                   |
| 4        | 20          |             |                               | 529.25865  | 1056.503  | 2         |           |         |       | 1056.504669 | 32.59     | SCPNPGEIR       |           |           |                 |                 |                   |
| 4        | 20          |             |                               | 578.279773 | 1154.545  | 2         |           |         |       | 1154.545471 | 42.03     | WSTAVEFCK       |           |           |                 |                 |                   |
| 4        | 20          |             |                               | 389.536897 | 1165.589  | 3         |           |         |       | 1165.590469 | 21.74     | HFHETTPNK       |           |           |                 |                 |                   |
| 4        | 20          |             |                               | 592.295719 | 1182.577  | 2         |           |         |       | 1182.576782 | 27.39     | WSTAVEFCK       |           |           |                 |                 |                   |
| 4        | 20          |             |                               | 592.295719 | 1182.577  | 2         |           |         |       | 1182.576782 | 25.12     | WSTAVEFCK       |           |           |                 |                 |                   |
| 4        | 20          |             |                               | 728.88461  | 1455.755  | 2         |           |         |       | 1455.752167 | 48.53     | TSFPEDTVITYK    |           |           |                 |                 |                   |
| 4        | 20          |             |                               | 728.88461  | 1455.755  | 2         |           |         |       | 1455.752167 | 45.46     | TSFPEDTVITYK    |           |           |                 |                 |                   |
| 4        | 20          |             |                               | 728.88461  | 1455.755  | 2         |           |         |       | 1455.752167 | 57.65     | TSFPEDTVITYK    |           |           |                 |                 |                   |
| 4        | 20          | IPI00784169 | Decay-accelerating factor 5   | 477.734637 | 953.4547  | 2         | 3         | 3.98    | 0.46  | 953.455261  | 24.97     | CEESFVK         |           |           |                 |                 |                   |
| 4        | 20          |             |                               | 485.286554 | 968.5586  | 2         |           |         |       | 968.567932  | 20.59     | REPSLSPK        |           |           |                 |                 |                   |
| 4        | 20          |             |                               | 323.860614 | 968.56    | 3         |           |         |       | 968.567932  | 21.34     | REPSLSPK        |           |           |                 |                 |                   |
| 4        | 20          |             |                               | 509.292485 | 1016.57   | 2         |           |         |       | 1016.571304 | 20.74     | LTCLQNLK        |           |           |                 |                 |                   |
| 4        | 20          |             |                               | 523.308361 | 1044.602  | 2         |           |         |       | 1044.602615 | 36.66     | LTCLQNLK        |           |           |                 |                 |                   |
| 4        | 20          |             |                               | 523.308366 | 1044.602  | 2         |           |         |       | 1044.602615 | 37.78     | LTCLQNLK        |           |           |                 |                 |                   |
| 4        | 20          |             |                               | 523.308366 | 1044.602  | 2         |           |         |       | 1044.602615 | 37.48     | LTCLQNLK        |           |           |                 |                 |                   |
| 4        | 20          |             |                               | 529.258514 | 1056.502  | 2         |           |         |       | 1056.504669 | 25.04     | SCPNPGEIR       |           |           |                 |                 |                   |
| 4        | 20          |             |                               | 529.258522 | 1056.502  | 2         |           |         |       | 1056.504669 | 28        | SCPNPGEIR       |           |           |                 |                 |                   |
| 4        | 20          |             |                               | 529.25865  | 1056.503  | 2         |           |         |       | 1056.504669 | 27.64     | SCPNPGEIR       |           |           |                 |                 |                   |
| 4        | 20          |             |                               | 529.25865  | 1056.503  | 2         |           |         |       | 1056.504669 | 32.59     | SCPNPGEIR       |           |           |                 |                 |                   |
| 4        | 20          |             |                               | 578.279773 | 1154.545  | 2         |           |         |       | 1154.545471 | 42.03     | WSTAVEFCK       |           |           |                 |                 |                   |
| 4        | 20          |             |                               | 389.536897 | 1165.589  | 3         |           |         |       | 1165.590469 | 21.74     | HFHETTPNK       |           |           |                 |                 |                   |
| 4        | 20          |             |                               | 592.295719 | 1182.577  | 2         |           |         |       | 1182.576782 | 27.39     | WSTAVEFCK       |           |           |                 |                 |                   |
| 4        | 20          |             |                               | 592.295719 | 1182.577  | 2         |           |         |       | 1182.576782 | 25.12     | WSTAVEFCK       |           |           |                 |                 |                   |
| 4        | 20          |             |                               | 728.88461  | 1455.755  | 2         |           |         |       | 1455.752167 | 48.53     | TSFPEDTVITYK    |           |           |                 |                 |                   |
| 4        | 20          |             |                               | 728.88461  | 1455.755  | 2         |           |         |       | 1455.752167 | 45.46     | TSFPEDTVITYK    |           |           |                 |                 |                   |
| 4        | 20          |             |                               | 728.88461  | 1455.755  | 2         |           |         |       | 1455.752167 | 57.65     | TSFPEDTVITYK    |           |           |                 |                 |                   |
| 4        | 21          | IPI00297779 | T-complex protein 1 subun     | 679.85239  | 1357.69   | 2         | 1         | 3.91    | 0.00  | 1357.686188 | 67.77     | GATQQILDEAER    | 679.8524  | 681.865   | 8.1             | 2.07            | 3.91              |
| 4        | 21          |             |                               | 679.85239  | 1357.69   | 2         |           |         |       | 1357.686188 | 59.92     | GATQQILDEAER    |           |           |                 |                 |                   |
| 4        | 21          |             |                               | 679.85239  | 1357.69   | 2         |           |         |       | 1357.686188 | 70.27     | GATQQILDEAER    |           |           |                 |                 |                   |
| 4        | 22          | IPI00306959 | Keratin, type II cytoskeletal | 531.285668 | 1060.557  | 2         | 3         | 3.06    | 0.72  | 1060.547211 | 27.43     | QDMARQLR        | 531.2809  | 533.2934  | 69.6            | 18.1            | 3.85              |
| 4        | 22          |             |                               | 566.811062 | 1131.608  | 2         |           |         |       | 1131.606049 | 41.24     | SAYGGPVGAGIR    | 566.8103  | 568.8229  | 2.46            | 1.01            | 2.44              |
| 4        | 22          |             |                               | 566.811062 | 1131.608  | 2         |           |         |       | 1131.606049 | 61.24     | SAYGGPVGAGIR    |           |           |                 |                 |                   |
| 4        | 22          |             |                               | 615.326133 | 1228.638  | 2         |           |         |       | 1228.632339 | 27.73     | LEAIAIEAEEER    |           |           |                 |                 |                   |
| 4        | 22          |             |                               | 635.84354  | 1269.673  | 2         |           |         |       | 1269.67012  | 63.1      | GQLEALQVDGGR    | 635.8423  | 637.8549  | 2.56            | 0.88            | 2.91              |
| 4        | 22          |             |                               | 635.84354  | 1269.673  | 2         |           |         |       | 1269.67012  | 54.78     | GQLEALQVDGGR    |           |           |                 |                 |                   |
| 4        | 23          | IPI00163187 | Fascin                        | 390.881126 | 1169.622  | 3         | 2         | 4.19    | 0.98  | 1169.621735 | 47.92     | FLIVAHDDGR      |           |           |                 |                 |                   |
| 4        | 23          |             |                               | 585.818825 | 1169.623  | 2         |           |         |       | 1169.621735 | 50.49     | FLIVAHDDGR      | 585.8188  | 587.8314  | 3.37            | 0.69            | 4.88              |
| 4        | 23          |             |                               | 423.612885 | 1267.817  | 3         |           |         |       | 1267.815277 | 23.78     | LINRPIIVFR      |           |           |                 |                 |                   |
| 4        | 23          |             |                               | 834.410031 | 1666.806  | 2         |           |         |       | 1666.800903 | 26.21     | YLAADKDGNTTCER  |           |           |                 |                 |                   |
| 4        | 23          |             |                               | 834.410031 | 1666.806  | 2         |           |         |       | 1666.800903 | 28.82     | YLAADKDGNTTCER  |           |           |                 |                 |                   |
| 4        | 23          |             |                               | 616.674122 | 1847.001  | 3         |           |         |       | 1846.996536 | 41.44     | LVARPEPATGYTLFR | 616.6741  | 618.0158  | 19.4            | 5.55            | 3.50              |
| 4        | 23          |             |                               | 616.674122 | 1847.001  | 3         |           |         |       | 1846.996536 | 44.65     | LVARPEPATGYTLFR |           |           |                 |                 |                   |
| 4        | 23          |             |                               | 924.509781 | 1847.005  | 2         |           |         |       | 1846.996536 | 28.23     | LVARPEPATGYTLFR |           |           |                 |                 |                   |
| 4        | 23          |             |                               | 924.509781 | 1847.005  | 2         |           |         |       | 1846.996536 | 25.44     | LVARPEPATGYTLFR |           |           |                 |                 |                   |
| 4        | 23          | IPI00747810 | FSCN1 protein                 | 390.881126 | 1169.622  | 3         | 2         | 4.19    | 0.98  | 1169.621735 | 47.92     | FLIVAHDDGR      |           |           |                 |                 |                   |

| Band num | prot_hit_nu | prot_acc    | prot_desc                 | pep_exp_mz | pep_exp_n | pep_exp_z | quantific | average | stdev | pep_calc_mr | pep_score | pep_seq            | light m/z | heavy m/z | light intensity | heavy intensity | ratio light/heavy |
|----------|-------------|-------------|---------------------------|------------|-----------|-----------|-----------|---------|-------|-------------|-----------|--------------------|-----------|-----------|-----------------|-----------------|-------------------|
| 4        | 23          |             |                           | 585.818825 | 1169.623  | 2         |           |         |       | 1169.621735 | 50.49     | FLIVAHDDGR         |           |           |                 |                 |                   |
| 4        | 23          |             |                           | 423.612885 | 1267.817  | 3         |           |         |       | 1267.815277 | 23.78     | LINRPIIVFR         |           |           |                 |                 |                   |
| 4        | 23          |             |                           | 834.410031 | 1666.806  | 2         |           |         |       | 1666.800903 | 26.21     | YLAADKDGNTTCER     |           |           |                 |                 |                   |
| 4        | 23          |             |                           | 834.410031 | 1666.806  | 2         |           |         |       | 1666.800903 | 28.82     | YLAADKDGNTTCER     |           |           |                 |                 |                   |
| 4        | 23          |             |                           | 616.674122 | 1847.001  | 3         |           |         |       | 1846.996536 | 41.44     | LVARPEPATGYTLFR    |           |           |                 |                 |                   |
| 4        | 23          |             |                           | 616.674122 | 1847.001  | 3         |           |         |       | 1846.996536 | 44.65     | LVARPEPATGYTLFR    |           |           |                 |                 |                   |
| 4        | 23          |             |                           | 924.509781 | 1847.005  | 2         |           |         |       | 1846.996536 | 28.23     | LVARPEPATGYTLFR    |           |           |                 |                 |                   |
| 4        | 23          |             |                           | 924.509781 | 1847.005  | 2         |           |         |       | 1846.996536 | 25.44     | LVARPEPATGYTLFR    |           |           |                 |                 |                   |
| 4        | 24          | IPI00002520 | Serine hydroxymethyltrans | 442.256283 | 882.498   | 2         | 3         | 3.07    | 0.50  | 882.498764  | 27.38     | SGLIFYR            |           |           |                 |                 |                   |
| 4        | 24          |             |                           | 450.269745 | 898.5249  | 2         |           |         |       | 898.526047  | 43.52     | SAITPGGLR          | 450.2698  | 452.2823  | 11              | 3.9             | 2.82              |
| 4        | 24          |             |                           | 450.269745 | 898.5249  | 2         |           |         |       | 898.526047  | 33.96     | SAITPGGLR          |           |           |                 |                 |                   |
| 4        | 24          |             |                           | 509.273741 | 1016.533  | 2         |           |         |       | 1016.534897 | 40.64     | AMADALLER          | 509.2737  | 511.2863  | 4.05            | 1.48            | 2.74              |
| 4        | 24          |             |                           | 582.343002 | 1162.671  | 2         |           |         |       | 1162.673431 | 56.06     | LIIAGTSAYAR        | 582.343   | 584.3556  | 9.06            | 2.49            | 3.64              |
| 4        | 24          |             |                           | 582.343002 | 1162.671  | 2         |           |         |       | 1162.673431 | 56.38     | LIIAGTSAYAR        |           |           |                 |                 |                   |
| 4        | 24          |             |                           | 599.294891 | 1196.575  | 2         |           |         |       | 1196.573792 | 36.4      | EIPYTFEDR          |           |           |                 |                 |                   |
| 4        | 24          |             |                           | 599.294891 | 1196.575  | 2         |           |         |       | 1196.573792 | 21.83     | EIPYTFEDR          |           |           |                 |                 |                   |
| 4        | 24          | IPI00748411 | SHMT2 protein (Fragment)  | 442.256283 | 882.498   | 2         | 3         | 3.07    | 0.50  | 882.498764  | 27.38     | SGLIFYR            |           |           |                 |                 |                   |
| 4        | 24          |             |                           | 450.269745 | 898.5249  | 2         |           |         |       | 898.526047  | 43.52     | SAITPGGLR          |           |           |                 |                 |                   |
| 4        | 24          |             |                           | 450.269745 | 898.5249  | 2         |           |         |       | 898.526047  | 33.96     | SAITPGGLR          |           |           |                 |                 |                   |
| 4        | 24          |             |                           | 509.273741 | 1016.533  | 2         |           |         |       | 1016.534897 | 40.64     | AMADALLER          |           |           |                 |                 |                   |
| 4        | 24          |             |                           | 582.343002 | 1162.671  | 2         |           |         |       | 1162.673431 | 56.06     | LIIAGTSAYAR        |           |           |                 |                 |                   |
| 4        | 24          |             |                           | 582.343002 | 1162.671  | 2         |           |         |       | 1162.673431 | 56.38     | LIIAGTSAYAR        |           |           |                 |                 |                   |
| 4        | 24          |             |                           | 599.294891 | 1196.575  | 2         |           |         |       | 1196.573792 | 36.4      | EIPYTFEDR          |           |           |                 |                 |                   |
| 4        | 24          |             |                           | 599.294891 | 1196.575  | 2         |           |         |       | 1196.573792 | 21.83     | EIPYTFEDR          |           |           |                 |                 |                   |
| 4        | 25          | IPI00168408 | WDR20 protein             | 825.402479 | 1648.79   | 2         | 1         | 1.54    | 0.00  | 1648.782913 | 59.32     | VSFVNLNDQSGNGDR    | 825.4025  | 827.415   | 6.43            | 4.17            | 1.54              |
| 4        | 25          |             |                           | 825.402479 | 1648.79   | 2         |           |         |       | 1648.782913 | 75.95     | VSFVNLNDQSGNGDR    |           |           |                 |                 |                   |
| 4        | 25          | IPI00290950 | Hypothetical protein DKFZ | 825.402479 | 1648.79   | 2         | 1         | 1.54    | 0.00  | 1648.782913 | 59.32     | VSFVNLNDQSGNGDR    |           |           |                 |                 |                   |
| 4        | 25          |             |                           | 825.402479 | 1648.79   | 2         |           |         |       | 1648.782913 | 75.95     | VSFVNLNDQSGNGDR    |           |           |                 |                 |                   |
| 4        | 25          | IPI00329787 | WD repeat domain 20 isofo | 825.402479 | 1648.79   | 2         | 1         | 1.54    | 0.00  | 1648.782913 | 59.32     | VSFVNLNDQSGNGDR    |           |           |                 |                 |                   |
| 4        | 25          |             |                           | 825.402479 | 1648.79   | 2         |           |         |       | 1648.782913 | 75.95     | VSFVNLNDQSGNGDR    |           |           |                 |                 |                   |
| 4        | 25          | IPI00377221 | WD repeat domain 20 isofo | 825.402479 | 1648.79   | 2         | 1         | 1.54    | 0.00  | 1648.782913 | 59.32     | VSFVNLNDQSGNGDR    |           |           |                 |                 |                   |
| 4        | 25          |             |                           | 825.402479 | 1648.79   | 2         |           |         |       | 1648.782913 | 75.95     | VSFVNLNDQSGNGDR    |           |           |                 |                 |                   |
| 4        | 26          | IPI00007750 | Tubulin alpha-1 chain     | 419.240208 | 836.4659  | 2         | 3         | 2.88    | 0.46  | 836.466812  | 23.25     | LSVDYGK            |           |           |                 |                 |                   |
| 4        | 26          |             |                           | 419.240208 | 836.4659  | 2         |           |         |       | 836.466812  | 31.05     | LSVDYGK            |           |           |                 |                 |                   |
| 4        | 26          |             |                           | 472.251911 | 942.4893  | 2         |           |         |       | 942.490921  | 21.23     | FDLMYAK            |           |           |                 |                 |                   |
| 4        | 26          |             |                           | 549.314641 | 1096.615  | 2         |           |         |       | 1096.615265 | 32.7      | EIIDPVLDR          |           |           |                 |                 |                   |
| 4        | 26          |             |                           | 549.314641 | 1096.615  | 2         |           |         |       | 1096.615265 | 26.52     | EIIDPVLDR          |           |           |                 |                 |                   |
| 4        | 26          |             |                           | 639.297866 | 1276.581  | 2         |           |         |       | 1276.579102 | 46.61     | YMACCLLYR          | 639.2968  | 641.3094  | 17.6            | 5.5             | 3.20              |
| 4        | 26          |             |                           | 639.297877 | 1276.581  | 2         |           |         |       | 1276.579102 | 33.89     | YMACCLLYR          |           |           |                 |                 |                   |
| 4        | 26          |             |                           | 639.297877 | 1276.581  | 2         |           |         |       | 1276.579102 | 22.41     | YMACCLLYR          |           |           |                 |                 |                   |
| 4        | 26          |             |                           | 647.295492 | 1292.576  | 2         |           |         |       | 1292.57402  | 25.81     | YMACCLLYR          |           |           |                 |                 |                   |
| 4        | 26          |             |                           | 480.273066 | 1437.797  | 3         |           |         |       | 1437.80043  | 35.4      | QLFHPEQLITGK       | 480.2741  | 481.6158  | 3.65            | 1.55            | 2.35              |
| 4        | 26          |             |                           | 480.273066 | 1437.797  | 3         |           |         |       | 1437.80043  | 31.38     | QLFHPEQLITGK       |           |           |                 |                 |                   |
| 4        | 26          |             |                           | 489.617308 | 1465.83   | 3         |           |         |       | 1465.831741 | 31.9      | QLFHPEQLITGK       |           |           |                 |                 |                   |
| 4        | 26          |             |                           | 582.976561 | 1745.908  | 3         |           |         |       | 1745.908478 | 24.53     | NLDIERPTYTNLNR     |           |           |                 |                 |                   |
| 4        | 26          |             |                           | 873.964014 | 1745.913  | 2         |           |         |       | 1745.908478 | 42.28     | NLDIERPTYTNLNR     | 873.9615  | 875.9741  | 5.84            | 1.89            | 3.09              |
| 4        | 27          | IPI00028359 | Hypothetical protein DKFZ | 453.242365 | 1356.705  | 3         | 3         | 1.00    | 0.07  | 1356.706192 | 20.7      | AQFSQLEEHK         | 453.2427  | 455.9261  | 4.92            | 0 L             |                   |
| 4        | 27          |             |                           | 686.379983 | 1370.745  | 2         |           |         |       | 1370.742966 | 58.78     | VTELEQQVAQAK       | 686.3788  | 688.3913  | 4.89            | 4.5             | 1.09              |
| 4        | 27          |             |                           | 686.379983 | 1370.745  | 2         |           |         |       | 1370.742966 | 66.93     | VTELEQQVAQAK       |           |           |                 |                 |                   |
| 4        | 27          |             |                           | 489.26359  | 1464.769  | 3         |           |         |       | 1464.77092  | 27.2      | NLEQISEQIHAR       | 489.2643  | 490.606   | 11.7            | 11.9            | 0.98              |
| 4        | 27          |             |                           | 703.028656 | 2106.064  | 3         |           |         |       | 2106.061707 | 27.74     | ETPQGELRPEVVEDEVPR | 703.0278  | 704.3696  | 0.84            | 0.89            | 0.94              |
| 4        | 28          | IPI00216008 | Isoform Long of Glucose-6 | 918.416806 | 1834.819  | 2         | 1         | 1.29    | 0.00  | 1834.814621 | 50.2      | NSYVAGQYDDAASYQR   | 918.4168  | 920.4294  | 6.85            | 5.29            | 1.29              |
| 4        | 28          |             |                           | 918.416806 | 1834.819  | 2         |           |         |       | 1834.814621 | 49.2      | NSYVAGQYDDAASYQR   |           |           |                 |                 |                   |
| 4        | 28          | IPI00289800 | glucose-6-phosphate dehy  | 918.416806 | 1834.819  | 2         | 1         | 1.29    | 0.00  | 1834.814621 | 50.2      | NSYVAGQYDDAASYQR   |           |           |                 |                 |                   |
| 4        | 28          |             |                           | 918.416806 | 1834.819  | 2         |           |         |       | 1834.814621 | 49.2      | NSYVAGQYDDAASYQR   |           |           |                 |                 |                   |
| 4        | 28          | IPI00642620 | Glucose-6-phosphate dehy  | 918.416806 | 1834.819  | 2         | 1         | 1.29    | 0.00  | 1834.814621 | 50.2      | NSYVAGQYDDAASYQR   |           |           |                 |                 |                   |
| 4        | 28          |             |                           | 918.416806 | 1834.819  | 2         |           |         |       | 1834.814621 | 49.2      | NSYVAGQYDDAASYQR   |           |           |                 |                 |                   |
| 4        | 28          | IPI00643089 | 33 kDa protein            | 918.416806 | 1834.819  | 2         | 1         | 1.29    | 0.00  | 1834.814621 | 50.2      | NSYVAGQYDDAASYQR   |           |           |                 |                 |                   |
| 4        | 28          |             |                           | 918.416806 | 1834.819  | 2         |           |         |       | 1834.814621 | 49.2      | NSYVAGQYDDAASYQR   |           |           |                 |                 |                   |
| 4        | 28          | IPI00645745 | 37 kDa protein            | 918.416806 | 1834.819  | 2         | 1         | 1.29    | 0.00  | 1834.814621 | 50.2      | NSYVAGQYDDAASYQR   |           |           |                 |                 |                   |
| 4        | 28          |             |                           | 918.416806 | 1834.819  | 2         |           |         |       | 1834.814621 | 49.2      | NSYVAGQYDDAASYQR   |           |           |                 |                 |                   |
| 4        | 28          | IPI00760751 | glucose-6-phosphate dehy  | 918.416806 | 1834.819  | 2         | 1         | 1.29    | 0.00  | 1834.814621 | 50.2      | NSYVAGQYDDAASYQR   |           |           |                 |                 |                   |
| 4        | 28          |             |                           | 918.416806 | 1834.819  | 2         |           |         |       | 1834.814621 | 49.2      | NSYVAGQYDDAASYQR   |           |           |                 |                 |                   |

| Band num | prot_hit_nu | prot_acc    | prot_desc                     | pep_exp_mz | pep_exp_n | pep_exp_z | quantific | average | stdev | pep_calc_mr | pep_score | pep_seq              | light m/z | heavy m/z | light intensity | heavy intensity | ratio light/heavy |
|----------|-------------|-------------|-------------------------------|------------|-----------|-----------|-----------|---------|-------|-------------|-----------|----------------------|-----------|-----------|-----------------|-----------------|-------------------|
| 4        | 29          | IPI00290770 | chaperonin containing TCF     | 597.86561  | 1193.717  | 2         | 2         | 2.11    | 0.48  | 1193.715622 | 60.7      | AVAQALEVIPR          | 597.8656  | 599.8782  | 3.47            | 1.96            | 1.77              |
| 4        | 29          |             |                               | 681.367664 | 1360.721  | 2         |           |         |       | 1360.715729 | 46.27     | TLIQNCGASTIR         | 681.3677  | 683.3802  | 1.74            | 0.71            | 2.45              |
| 4        | 29          | IPI00552715 | chaperonin containing TCF     | 597.86561  | 1193.717  | 2         | 2         | 2.11    | 0.48  | 1193.715622 | 60.7      | AVAQALEVIPR          |           |           |                 |                 |                   |
| 4        | 29          |             |                               | 681.367664 | 1360.721  | 2         |           |         |       | 1360.715729 | 46.27     | TLIQNCGASTIR         |           |           |                 |                 |                   |
| 4        | 29          | IPI00553185 | T-complex protein 1 subun     | 597.86561  | 1193.717  | 2         | 2         | 2.11    | 0.48  | 1193.715622 | 60.7      | AVAQALEVIPR          |           |           |                 |                 |                   |
| 4        | 29          |             |                               | 681.367664 | 1360.721  | 2         |           |         |       | 1360.715729 | 46.27     | TLIQNCGASTIR         |           |           |                 |                 |                   |
| 4        | 29          | IPI00744315 | 60 kDa protein                | 597.86561  | 1193.717  | 2         | 2         | 2.11    | 0.48  | 1193.715622 | 60.7      | AVAQALEVIPR          |           |           |                 |                 |                   |
| 4        | 29          |             |                               | 681.367664 | 1360.721  | 2         |           |         |       | 1360.715729 | 46.27     | TLIQNCGASTIR         |           |           |                 |                 |                   |
| 4        | 30          | IPI00302927 | T-complex protein 1 subun     | 606.333864 | 1210.653  | 2         | 1         | 3.07    | 0.00  | 1210.651672 | 27.25     | SIHDALCVIR           |           |           |                 |                 |                   |
| 4        | 30          |             |                               | 693.38604  | 1384.758  | 2         |           |         |       | 1384.758636 | 59.94     | VIDPATATSVDLR        | 693.386   | 695.3986  | 3.53            | 1.15            | 3.07              |
| 4        | 30          |             |                               | 693.387293 | 1384.76   | 2         |           |         |       | 1384.758636 | 42.76     | VIDPATATSVDLR        |           |           |                 |                 |                   |
| 4        | 31          | IPI00005859 | Cytokeratin type II           | 554.2763   | 1106.538  | 2         |           |         |       | 1106.538071 | 38.9      | AQYEDIANR            |           |           |                 |                 |                   |
| 4        | 31          |             |                               | 554.2763   | 1106.538  | 2         |           |         |       | 1106.538071 | 53.13     | AQYEDIANR            | 554.2763  | 556.2889  | 6.08            | 3.17            | 1.92              |
| 4        | 31          |             |                               | 327.00795  | 1956.004  | 6         |           |         |       | 1956.016327 | 20.78     | GLGGGSSSVKVFSTTSSSQK | 327.01    | 329.0226  | 4.74            | 0.63            | 7.52              |
| 4        | 32          | IPI00019906 | Isoform 2 of Basigin precu    | 521.769847 | 1041.525  | 2         | 2         | 6.92    | 0.85  | 1041.526764 | 27.1      | FFVSSSQGR            | 521.7699  | 523.7825  | 4.74            | 0.63            | 7.52              |
| 4        | 32          |             |                               | 521.769894 | 1041.525  | 2         |           |         |       | 1041.526764 | 36.52     | FFVSSSQGR            |           |           |                 |                 |                   |
| 4        | 32          |             |                               | 551.317549 | 1100.621  | 2         |           |         |       | 1100.621414 | 56.24     | GSDQAIITLR           | 551.3176  | 553.3301  | 3.6             | 0.57            | 6.32              |
| 4        | 32          | IPI00218019 | Isoform 1 of Basigin precu    | 521.769847 | 1041.525  | 2         | 2         | 6.92    | 0.85  | 1041.526764 | 27.1      | FFVSSSQGR            |           |           |                 |                 |                   |
| 4        | 32          |             |                               | 521.769894 | 1041.525  | 2         |           |         |       | 1041.526764 | 36.52     | FFVSSSQGR            |           |           |                 |                 |                   |
| 4        | 32          |             |                               | 551.317549 | 1100.621  | 2         |           |         |       | 1100.621414 | 56.24     | GSDQAIITLR           |           |           |                 |                 |                   |
| 4        | 32          | IPI00394876 | basigin isoform 3             | 521.769847 | 1041.525  | 2         | 2         | 6.92    | 0.85  | 1041.526764 | 27.1      | FFVSSSQGR            |           |           |                 |                 |                   |
| 4        | 32          |             |                               | 521.769894 | 1041.525  | 2         |           |         |       | 1041.526764 | 36.52     | FFVSSSQGR            |           |           |                 |                 |                   |
| 4        | 32          |             |                               | 551.317549 | 1100.621  | 2         |           |         |       | 1100.621414 | 56.24     | GSDQAIITLR           |           |           |                 |                 |                   |
| 4        | 32          | IPI00394877 | basigin isoform 4             | 521.769847 | 1041.525  | 2         | 2         | 6.92    | 0.85  | 1041.526764 | 27.1      | FFVSSSQGR            |           |           |                 |                 |                   |
| 4        | 32          |             |                               | 521.769894 | 1041.525  | 2         |           |         |       | 1041.526764 | 36.52     | FFVSSSQGR            |           |           |                 |                 |                   |
| 4        | 32          |             |                               | 551.317549 | 1100.621  | 2         |           |         |       | 1100.621414 | 56.24     | GSDQAIITLR           |           |           |                 |                 |                   |
| 4        | 33          | IPI00001723 | Isoform 1 of Probable phos    | 509.808698 | 1017.603  | 2         |           |         |       | 1017.597076 | 57.68     | HPSLGGLPIK           | 509.8058  | 513.8309  |                 |                 |                   |
| 4        | 34          | IPI00554786 | Thioredoxin reductase 1, c    | 592.819805 | 1183.625  | 2         | 1         | 4.21    | 0.00  | 1183.622116 | 53.55     | VEQIEAGTPGR          | 592.8198  | 594.8324  | 1.22            | 0.29            | 4.21              |
| 4        | 34          |             |                               | 592.82003  | 1183.626  | 2         |           |         |       | 1183.622116 | 24.37     | VEQIEAGTPGR          |           |           |                 |                 |                   |
| 4        | 34          | IPI00743646 | CDNA FLJ46672 fis, clone      | 592.819805 | 1183.625  | 2         | 1         | 4.21    | 0.00  | 1183.622116 | 53.55     | VEQIEAGTPGR          |           |           |                 |                 |                   |
| 4        | 34          |             |                               | 592.82003  | 1183.626  | 2         |           |         |       | 1183.622116 | 24.37     | VEQIEAGTPGR          |           |           |                 |                 |                   |
| 4        | 34          | IPI00783641 | KM-102-derived reductase      | 592.819805 | 1183.625  | 2         | 1         | 4.21    | 0.00  | 1183.622116 | 53.55     | VEQIEAGTPGR          |           |           |                 |                 |                   |
| 4        | 34          |             |                               | 592.82003  | 1183.626  | 2         |           |         |       | 1183.622116 | 24.37     | VEQIEAGTPGR          |           |           |                 |                 |                   |
| 4        | 35          | IPI00026516 | Succinyl-CoA:3-ketoacid-co    | 831.380095 | 1660.746  | 2         | 1         | 6.47    | 0.00  | 1660.742676 | 45.45     | MVSSYVGENAEFER       | 831.3801  | 833.3927  | 5.05            | 0.78            | 6.47              |
| 4        | 36          | IPI00010676 | Isoform 1 of Urokinase pla    | 739.346452 | 1476.678  | 2         | 1         | 3.13    | 0.00  | 1476.672531 | 44.45     | VEECALGQDLR          | 739.3465  | 741.359   | 1.44            | 0.46            | 3.13              |
| 4        | 36          | IPI00215706 | Isoform 2 of Urokinase pla    | 739.346452 | 1476.678  | 2         | 1         | 3.13    | 0.00  | 1476.672531 | 44.45     | VEECALGQDLR          |           |           |                 |                 |                   |
| 4        | 36          | IPI00215707 | Isoform 3 of Urokinase pla    | 739.346452 | 1476.678  | 2         | 1         | 3.13    | 0.00  | 1476.672531 | 44.45     | VEECALGQDLR          |           |           |                 |                 |                   |
| 4        | 37          | IPI00329572 | 49 kDa protein                | 913.435767 | 1824.857  | 2         | 1         | 2.80    | 0.00  | 1824.85141  | 27.14     | DLHQGIEAASDEEDLR     | 913.4358  | 915.4483  | 1.4             | 0.5             | 2.80              |
| 4        | 37          |             |                               | 913.435767 | 1824.857  | 2         |           |         |       | 1824.85141  | 39.1      | DLHQGIEAASDEEDLR     |           |           |                 |                 |                   |
| 4        | 37          | IPI00783170 | Protein kinase C and casei    | 913.435767 | 1824.857  | 2         | 1         | 2.80    | 0.00  | 1824.85141  | 27.14     | DLHQGIEAASDEEDLR     |           |           |                 |                 |                   |
| 4        | 37          |             |                               | 913.435767 | 1824.857  | 2         |           |         |       | 1824.85141  | 39.1      | DLHQGIEAASDEEDLR     |           |           |                 |                 |                   |
| 4        | 38          | IPI00026270 | Carboxypeptidase M precu      | 492.902269 | 1475.685  | 3         | 1         | 1.56    | 0.00  | 1475.68512  | 40.86     | YVANMHGDETVGR        | 492.9023  | 494.244   | 1.76            | 1.13            | 1.56              |
| 4        | 39          | IPI00645951 | diffuse panbronchiolitis crit | 858.960323 | 1715.906  | 2         | 1         | L       | 0.00  | 1715.905365 | 39.58     | VTGDKSLTTTSSHLNK     | 858.9603  | 860.9729  | 4.54            | 0               | L                 |
| 4        | 39          |             |                               | 858.960323 | 1715.906  | 2         |           |         |       | 1715.905365 | 20.06     | VTGDKSLTTTSSHLNK     |           |           |                 |                 |                   |
| 4        | 39          | IPI00142856 | Hypothetical protein DKFZ     | 858.960323 | 1715.906  | 2         | 1         | L       | 0.00  | 1715.905365 | 39.58     | VTGDKSLTTTSSHLNK     |           |           |                 |                 |                   |
| 4        | 39          |             |                               | 858.960323 | 1715.906  | 2         |           |         |       | 1715.905365 | 20.06     | VTGDKSLTTTSSHLNK     |           |           |                 |                 |                   |
| 4        | 39          | IPI00643336 | Diffuse panbronchiolitis crit | 858.960323 | 1715.906  | 2         | 1         | L       | 0.00  | 1715.905365 | 39.58     | VTGDKSLTTTSSHLNK     |           |           |                 |                 |                   |
| 4        | 39          |             |                               | 858.960323 | 1715.906  | 2         |           |         |       | 1715.905365 | 20.06     | VTGDKSLTTTSSHLNK     |           |           |                 |                 |                   |
| 4        | 40          | IPI00018009 | Enhancer of mRNA decap        | 456.27064  | 910.5267  | 2         | 2         | 4.76    | 0.18  | 910.530075  | 36.04     | FVIPLHSA             | 456.2706  | 458.2832  | 8.01            | 1.73            | 4.63              |
| 4        | 40          |             |                               | 354.894546 | 1061.662  | 3         |           |         |       | 1061.662155 | 22.07     | IIVPHNVSK            |           |           |                 |                 |                   |
| 4        | 40          |             |                               | 564.799231 | 1127.584  | 2         |           |         |       | 1127.586014 | 32.8      | AAVAVANQNR           | 564.7992  | 566.8118  | 4.49            | 0.92            | 4.88              |
| 4        | 41          | IPI00009812 | Gene_Symbol=TLR7 Toll-I       | 338.711333 | 675.4081  | 2         | 1         | 3.72    | 0.00  | 675.406769  | 37.34     | FLQLR                | 338.7107  | 340.7232  | 71.8            | 19.3            | 3.72              |
| 4        | 41          |             |                               | 338.711334 | 675.4081  | 2         |           |         |       | 675.406769  | 33.53     | FLQLR                |           |           |                 |                 |                   |
| 4        | 41          | IPI00025094 | Gene_Symbol=MYH16 cD          | 338.711333 | 675.4081  | 2         | 1         | 3.71    | 0.00  | 675.406769  | 37.34     | FLQLR                | 338.7107  | 340.7232  | 71.6            | 19.3            | 3.71              |
| 4        | 41          |             |                               | 338.711334 | 675.4081  | 2         |           |         |       | 675.406769  | 33.53     | FLQLR                |           |           |                 |                 |                   |
| 4        | 42          | IPI00027626 | T-complex protein 1 subun     | 483.279617 | 964.5447  | 2         | 1         | 3.56    | 0.00  | 964.547836  | 38.65     | GLVLDHGAR            | 483.2796  | 485.2922  | 1.6             | 0.45            | 3.56              |
| 4        | 42          | IPI00552590 | chaperonin containing TCF     | 483.279617 | 964.5447  | 2         | 1         | 3.56    | 0.00  | 964.547836  | 38.65     | GLVLDHGAR            |           |           |                 |                 |                   |
| 4        | 43          | IPI00295022 | NK-tumor recognition prote    | 520.726925 | 1039.439  | 2         | 1         | L       | 0.00  | 1039.449173 | 36.35     | QESSMSESK            | 520.7269  | 522.7395  | 3.31            | 0               | L                 |
| 4        | 44          | IPI00009456 | 5--nucleotidase precursor     | 649.32716  | 1296.64   | 2         | 2         | L       | 0.00  | 1296.637451 | 27.35     | YPFIVTSDGGR          | 649.3272  | 651.3397  | 1.99            | 0               | L                 |
| 4        | 44          |             |                               | 757.372924 | 1512.731  | 2         |           |         |       | 1512.726685 | 30.57     | TIVYLDGSSQSCR        | 757.3729  | 759.3855  | 0.86            | 0               | L                 |
| 4        | 44          | IPI00552302 | 5--nucleotidase, ecto         | 649.32716  | 1296.64   | 2         | 2         | L       | 0.00  | 1296.637451 | 27.35     | YPFIVTSDGGR          |           |           |                 |                 |                   |
| 4        | 44          |             |                               | 757.372924 | 1512.731  | 2         |           |         |       | 1512.726685 | 30.57     | TIVYLDGSSQSCR        |           |           |                 |                 |                   |
| 4        | 44          | IPI00552444 | 5--nucleotidase, ecto         | 649.32716  | 1296.64   | 2         | 2         | L       | 0.00  | 1296.637451 | 27.35     | YPFIVTSDGGR          |           |           |                 |                 |                   |

| Band num | prot_hit | nu_prot_acc | prot_desc                   | pep_exp_mz | pep_exp_n | pep_exp_z | quantific | average | stdev | pep_calc_mr | pep_score | pep_seq         | light m/z | heavy m/z | light intensity | heavy intensity | ratio light/heavy |
|----------|----------|-------------|-----------------------------|------------|-----------|-----------|-----------|---------|-------|-------------|-----------|-----------------|-----------|-----------|-----------------|-----------------|-------------------|
| 4        | 44       |             |                             | 757.372924 | 1512.731  | 2         |           |         |       | 1512.726685 | 30.57     | TIVVLDGSSQSCR   |           |           |                 |                 |                   |
| 4        | 45       | IPI00013894 | Stress-induced-phosphopr    | 547.298419 | 1092.582  | 2         | 1         | 10.75   | 0.00  | 1092.583984 | 35.23     | TLLSDPTYR       | 547.2984  | 549.311   | 3.44            | 0.32            | 10.75             |
| 4        | 45       | IPI00479946 | STIP1 protein               | 547.298419 | 1092.582  | 2         | 1         | 10.75   | 0.00  | 1092.583984 | 35.23     | TLLSDPTYR       |           |           |                 |                 |                   |
| 4        | 46       | IPI00302925 | Chaperonin containing TC    | 457.277357 | 912.5402  | 2         | 1         | 2.94    | 0.00  | 912.541702  | 33.98     | TVGATALPR       | 457.2774  | 459.2899  | 4.56            | 1.55            | 2.94              |
| 4        | 46       | IPI00784090 | T-complex protein 1 subun   | 457.277357 | 912.5402  | 2         | 1         | 2.94    | 0.00  | 912.541702  | 33.98     | TVGATALPR       |           |           |                 |                 |                   |
| 4        | 47       | IPI00478832 | FBF1 protein                | 528.805249 | 1055.596  | 2         | 1         | 2.49    | 0.00  | 1055.59993  | 33.43     | LAELEAQVR       | 528.8053  | 530.8178  | 4.39            | 1.76            | 2.49              |
| 4        | 47       | IPI00480024 | PREDICTED: similar to Fa    | 528.805249 | 1055.596  | 2         | 1         | 2.49    | 0.00  | 1055.59993  | 33.43     | LAELEAQVR       |           |           |                 |                 |                   |
| 4        | 47       | IPI00647873 | 90 kDa protein              | 528.805249 | 1055.596  | 2         | 1         | 2.49    | 0.00  | 1055.59993  | 33.43     | LAELEAQVR       |           |           |                 |                 |                   |
| 4        | 47       | IPI00738597 | PREDICTED: similar to Fa    | 528.805249 | 1055.596  | 2         | 1         | 2.49    | 0.00  | 1055.59993  | 33.43     | LAELEAQVR       |           |           |                 |                 |                   |
| 4        | 47       | IPI00787675 | FLJ00103 protein (Fragme    | 528.805249 | 1055.596  | 2         | 1         | 2.49    | 0.00  | 1055.59993  | 33.43     | LAELEAQVR       |           |           |                 |                 |                   |
| 4        | 48       | IPI00011197 | sorting nexin 25            | 407.753261 | 813.492   | 2         | 1         | L       | 0.00  | 813.498444  | 33.4      | VIDVQGK         | 407.7533  | 411.7784  | 6.31            |                 | 0 L               |
| 4        | 48       | IPI00024706 | Hypothetical protein FLJ23  | 407.753261 | 813.492   | 2         | 1         | L       | 0.00  | 813.498444  | 33.4      | VIDVQGK         |           |           |                 |                 |                   |
| 4        | 49       | IPI00470711 | Hypothetical protein DKFZ   | 529.82937  | 1057.644  | 2         | 1         | 3.24    | 0.00  | 1057.64299  | 32.87     | RIQIMLLR        | 529.8288  | 531.8413  | 2.82            | 0.87            | 3.24              |
| 4        | 50       | IPI00022086 | KIAA1325 protein (Fragme    | 557.31521  | 1112.616  | 2         | 1         | L       | 0.00  | 1112.626373 | 31.96     | KILDSPCPK       | 557.3152  | 561.3403  | 5.09            |                 | 0 L               |
| 4        | 50       |             |                             | 557.315226 | 1112.616  | 2         |           |         |       | 1112.626373 | 24.1      | KILDSPCPK       |           |           |                 |                 |                   |
| 4        | 50       | IPI00470656 | Hypothetical protein DKFZ   | 557.31521  | 1112.616  | 2         | 1         | L       | 0.00  | 1112.626373 | 31.96     | KILDSPCPK       |           |           |                 |                 |                   |
| 4        | 50       |             |                             | 557.315226 | 1112.616  | 2         |           |         |       | 1112.626373 | 24.1      | KILDSPCPK       |           |           |                 |                 |                   |
| 4        | 50       | IPI00744401 | LRP2 binding protein        | 557.31521  | 1112.616  | 2         | 1         | L       | 0.00  | 1112.626373 | 31.96     | KILDSPCPK       |           |           |                 |                 |                   |
| 4        | 50       |             |                             | 557.315226 | 1112.616  | 2         |           |         |       | 1112.626373 | 24.1      | KILDSPCPK       |           |           |                 |                 |                   |
| 4        | 51       | IPI00297656 | cyclic nucleotide gated cha | 526.773486 | 1051.532  | 2         | 1         | 4.40    | 0.00  | 1051.532272 | 31.45     | EAATDPPAPR      | 526.7734  | 528.786   | 545             | 124             | 4.40              |
| 4        | 51       | IPI00646195 | Rod photoreceptor CNG-cl    | 526.773486 | 1051.532  | 2         |           |         |       | 1051.532272 | 31.45     | EAATDPPAPR      |           |           |                 |                 |                   |
| 4        | 52       | IPI00102281 | Hypothetical protein FLJ25  | 471.785284 | 941.556   | 2         | 1         | 9.27    | 0.00  | 941.557007  | 30.96     | GSPGASLGIK      | 471.7858  | 475.8109  | 596000          | 64300           | 9.27              |
| 4        | 53       | IPI00023673 | Galectin-3-binding protein  | 617.793447 | 1233.582  | 2         | 2         | 1.47    | 0.02  | 1233.580276 | 29.93     | AVDTWSWGER      | 617.7985  | 619.811   | 7.68            | 5.29            | 1.45              |
| 4        | 53       |             |                             | 692.406866 | 1382.799  | 2         |           |         |       | 1382.804504 | 22.91     | SDLAVPSELALLK   | 692.4069  | 694.4194  | 0.49            | 0.33            | 1.48              |
| 4        | 54       | IPI00021692 | Isoform EXP42 of Muscleb    | 435.775024 | 869.5355  | 2         | 1         | 2.03    | 0.00  | 869.535889  | 29.26     | AVSVTPIR        | 435.775   | 437.7876  | 1970            | 970             | 2.03              |
| 4        | 54       | IPI00178116 | muscleblind-like 1 isoform  | 435.775024 | 869.5355  | 2         | 1         | 2.03    | 0.00  | 869.535889  | 29.26     | AVSVTPIR        |           |           |                 |                 |                   |
| 4        | 54       | IPI00218263 | Isoform EXP40 of Muscleb    | 435.775024 | 869.5355  | 2         | 1         | 2.03    | 0.00  | 869.535889  | 29.26     | AVSVTPIR        |           |           |                 |                 |                   |
| 4        | 54       | IPI00384261 | Muscleblind-like protein EX | 435.775024 | 869.5355  | 2         | 1         | 2.03    | 0.00  | 869.535889  | 29.26     | AVSVTPIR        |           |           |                 |                 |                   |
| 4        | 54       | IPI00395357 | muscleblind-like 1 isoform  | 435.775024 | 869.5355  | 2         | 1         | 2.03    | 0.00  | 869.535889  | 29.26     | AVSVTPIR        |           |           |                 |                 |                   |
| 4        | 54       | IPI00410205 | Isoform EXP35 of Muscleb    | 435.775024 | 869.5355  | 2         | 1         | 2.03    | 0.00  | 869.535889  | 29.26     | AVSVTPIR        |           |           |                 |                 |                   |
| 4        | 54       | IPI00410279 | muscleblind-like 1 isoform  | 435.775024 | 869.5355  | 2         | 1         | 2.03    | 0.00  | 869.535889  | 29.26     | AVSVTPIR        |           |           |                 |                 |                   |
| 5        | 1        | IPI00169383 | Phosphoglycerate kinase 1   | 332.195466 | 662.3764  | 2         | 4         | 3.32    | 0.58  | 662.377594  | 29.29     | IEAFR           |           |           |                 |                 |                   |
| 5        | 1        |             |                             | 357.232195 | 712.4498  | 2         |           |         |       | 712.45076   | 43.54     | AAVPSIK         | 357.2322  | 359.2448  | 18.2            | 4.94            | 3.68              |
| 5        | 1        |             |                             | 390.229091 | 778.4436  | 2         |           |         |       | 778.443558  | 33.06     | AGGFLMK         |           |           |                 |                 |                   |
| 5        | 1        |             |                             | 390.229091 | 778.4436  | 2         |           |         |       | 778.443558  | 29.77     | AGGFLMK         |           |           |                 |                 |                   |
| 5        | 1        |             |                             | 456.745593 | 911.4766  | 2         |           |         |       | 911.477692  | 34.54     | ELNYFAK         |           |           |                 |                 |                   |
| 5        | 1        |             |                             | 466.760268 | 931.506   | 2         |           |         |       | 931.507278  | 34.65     | ALMDEVVK        |           |           |                 |                 |                   |
| 5        | 1        |             |                             | 466.760268 | 931.506   | 2         |           |         |       | 931.507278  | 56.61     | ALMDEVVK        |           |           |                 |                 |                   |
| 5        | 1        |             |                             | 466.760268 | 931.506   | 2         |           |         |       | 931.507278  | 51.42     | ALMDEVVK        |           |           |                 |                 |                   |
| 5        | 1        |             |                             | 470.761715 | 939.5089  | 2         |           |         |       | 939.509003  | 37.65     | ELNYFAK         |           |           |                 |                 |                   |
| 5        | 1        |             |                             | 470.761715 | 939.5089  | 2         |           |         |       | 939.509003  | 26.36     | ELNYFAK         |           |           |                 |                 |                   |
| 5        | 1        |             |                             | 476.732284 | 951.45    | 2         |           |         |       | 951.450836  | 21.98     | FCLDNQAK        |           |           |                 |                 |                   |
| 5        | 1        |             |                             | 488.774014 | 975.5335  | 2         |           |         |       | 975.533508  | 28.1      | ALMDEVVK        |           |           |                 |                 |                   |
| 5        | 1        |             |                             | 501.750092 | 1001.486  | 2         |           |         |       | 1001.484222 | 27.85     | FHVEEKG         |           |           |                 |                 |                   |
| 5        | 1        |             |                             | 503.276274 | 1004.538  | 2         |           |         |       | 1004.538925 | 42.98     | VDFNVPMK        |           |           |                 |                 |                   |
| 5        | 1        |             |                             | 503.276274 | 1004.538  | 2         |           |         |       | 1004.538925 | 36.88     | VDFNVPMK        |           |           |                 |                 |                   |
| 5        | 1        |             |                             | 503.276274 | 1004.538  | 2         |           |         |       | 1004.538925 | 32.88     | VDFNVPMK        |           |           |                 |                 |                   |
| 5        | 1        |             |                             | 515.763665 | 1029.513  | 2         |           |         |       | 1029.515533 | 22.23     | FHVEEKG         |           |           |                 |                 |                   |
| 5        | 1        |             |                             | 544.768595 | 1087.523  | 2         |           |         |       | 1087.524399 | 65.51     | DCVGPEVEK       |           |           |                 |                 |                   |
| 5        | 1        |             |                             | 544.768598 | 1087.523  | 2         |           |         |       | 1087.524399 | 65.28     | DCVGPEVEK       |           |           |                 |                 |                   |
| 5        | 1        |             |                             | 544.768999 | 1087.523  | 2         |           |         |       | 1087.524399 | 49.41     | DCVGPEVEK       |           |           |                 |                 |                   |
| 5        | 1        |             |                             | 465.919989 | 1394.738  | 3         |           |         |       | 1394.736435 | 45.61     | AHSSMVGYNLPQK   |           |           |                 |                 |                   |
| 5        | 1        |             |                             | 465.919989 | 1394.738  | 3         |           |         |       | 1394.736435 | 54.28     | AHSSMVGYNLPQK   |           |           |                 |                 |                   |
| 5        | 1        |             |                             | 698.381281 | 1394.748  | 2         |           |         |       | 1394.736435 | 59.13     | AHSSMVGYNLPQK   |           |           |                 |                 |                   |
| 5        | 1        |             |                             | 698.381281 | 1394.748  | 2         |           |         |       | 1394.736435 | 57.53     | AHSSMVGYNLPQK   |           |           |                 |                 |                   |
| 5        | 1        |             |                             | 471.250979 | 1410.731  | 3         |           |         |       | 1410.731354 | 21.71     | AHSSMVGYNLPQK   |           |           |                 |                 |                   |
| 5        | 1        |             |                             | 475.262926 | 1422.767  | 3         |           |         |       | 1422.767746 | 20.85     | AHSSMVGYNLPQK   |           |           |                 |                 |                   |
| 5        | 1        |             |                             | 480.594431 | 1438.761  | 3         |           |         |       | 1438.762665 | 26.98     | AHSSMVGYNLPQK   |           |           |                 |                 |                   |
| 5        | 1        |             |                             | 480.594431 | 1438.761  | 3         |           |         |       | 1438.762665 | 37.06     | AHSSMVGYNLPQK   |           |           |                 |                 |                   |
| 5        | 1        |             |                             | 480.594686 | 1438.762  | 3         |           |         |       | 1438.762665 | 29.05     | AHSSMVGYNLPQK   |           |           |                 |                 |                   |
| 5        | 1        |             |                             | 554.947122 | 1661.82   | 3         |           |         |       | 1661.818573 | 68.2      | LGDVYVNDAFGTAHR |           |           |                 |                 |                   |
| 5        | 1        |             |                             | 554.947122 | 1661.82   | 3         |           |         |       | 1661.818573 | 98.18     | LGDVYVNDAFGTAHR |           |           |                 |                 |                   |
| 5        | 1        |             |                             | 554.947122 | 1661.82   | 3         |           |         |       | 1661.818573 | 80.73     | LGDVYVNDAFGTAHR |           |           |                 |                 |                   |

| Band num | prot_hit_nu | prot_acc    | prot_desc | pep_exp_mz | pep_exp_n | pep_exp_z | quantific | average | stdev | pep_calc_mr | pep_score | pep_seq            | light m/z | heavy m/z | light intensity | heavy intensity | ratio light/heavy |  |
|----------|-------------|-------------|-----------|------------|-----------|-----------|-----------|---------|-------|-------------|-----------|--------------------|-----------|-----------|-----------------|-----------------|-------------------|--|
| 5        | 1           |             |           | 554.947122 | 1661.82   | 3         |           |         |       | 1661.818573 | 61.64     | LGDVYVNDAFGTAHR    |           |           |                 |                 |                   |  |
| 5        | 1           |             |           | 831.919119 | 1661.824  | 2         |           |         |       | 1661.818573 | 91.53     | LGDVYVNDAFGTAHR    | 831.9191  | 933.9317  | 16.6            | 5.09            | 3.26              |  |
| 5        | 1           |             |           | 831.919119 | 1661.824  | 2         |           |         |       | 1661.818573 | 91.25     | LGDVYVNDAFGTAHR    |           |           |                 |                 |                   |  |
| 5        | 1           |             |           | 831.919122 | 1661.824  | 2         |           |         |       | 1661.818573 | 108.55    | LGDVYVNDAFGTAHR    |           |           |                 |                 |                   |  |
| 5        | 1           |             |           | 831.919162 | 1661.824  | 2         |           |         |       | 1661.818573 | 86.6      | LGDVYVNDAFGTAHR    |           |           |                 |                 |                   |  |
| 5        | 1           |             |           | 831.919162 | 1661.824  | 2         |           |         |       | 1661.818573 | 53.59     | LGDVYVNDAFGTAHR    |           |           |                 |                 |                   |  |
| 5        | 1           |             |           | 590.320808 | 1767.941  | 3         |           |         |       | 1767.939056 | 68.42     | VSHVSTGGGASLELLEGG |           |           |                 |                 |                   |  |
| 5        | 1           |             |           | 590.320808 | 1767.941  | 3         |           |         |       | 1767.939056 | 72.79     | VSHVSTGGGASLELLEGG |           |           |                 |                 |                   |  |
| 5        | 1           |             |           | 884.980105 | 1767.946  | 2         |           |         |       | 1767.939056 | 56.87     | VSHVSTGGGASLELLEGG | 884.9801  | 886.9927  | 1.94            | 0.51            | 3.80              |  |
| 5        | 1           |             |           | 884.980105 | 1767.946  | 2         |           |         |       | 1767.939056 | 78.78     | VSHVSTGGGASLELLEGG |           |           |                 |                 |                   |  |
| 5        | 1           |             |           | 884.980105 | 1767.946  | 2         |           |         |       | 1767.939056 | 50.09     | VSHVSTGGGASLELLEGG |           |           |                 |                 |                   |  |
| 5        | 1           |             |           | 884.980105 | 1767.946  | 2         |           |         |       | 1767.939056 | 76.49     | VSHVSTGGGASLELLEGG |           |           |                 |                 |                   |  |
| 5        | 1           |             |           | 891.916582 | 1781.819  | 2         |           |         |       | 1781.813461 | 93.78     | GCITIIGGGDTATCCAK  |           |           |                 |                 |                   |  |
| 5        | 1           |             |           | 891.916582 | 1781.819  | 2         |           |         |       | 1781.813461 | 82.4      | GCITIIGGGDTATCCAK  |           |           |                 |                 |                   |  |
| 5        | 1           |             |           | 891.916582 | 1781.819  | 2         |           |         |       | 1781.813461 | 86.07     | GCITIIGGGDTATCCAK  |           |           |                 |                 |                   |  |
| 5        | 1           |             |           | 891.916582 | 1781.819  | 2         |           |         |       | 1781.813461 | 88.55     | GCITIIGGGDTATCCAK  |           |           |                 |                 |                   |  |
| 5        | 1           |             |           | 599.664262 | 1795.971  | 3         |           |         |       | 1795.970367 | 53.31     | VSHVSTGGGASLELLEGG |           |           |                 |                 |                   |  |
| 5        | 1           |             |           | 599.664262 | 1795.971  | 3         |           |         |       | 1795.970367 | 76.4      | VSHVSTGGGASLELLEGG |           |           |                 |                 |                   |  |
| 5        | 1           |             |           | 599.664262 | 1795.971  | 3         |           |         |       | 1795.970367 | 55.61     | VSHVSTGGGASLELLEGG |           |           |                 |                 |                   |  |
| 5        | 1           |             |           | 898.995093 | 1795.976  | 2         |           |         |       | 1795.970367 | 69.92     | VSHVSTGGGASLELLEGG |           |           |                 |                 |                   |  |
| 5        | 1           |             |           | 898.995093 | 1795.976  | 2         |           |         |       | 1795.970367 | 59.94     | VSHVSTGGGASLELLEGG |           |           |                 |                 |                   |  |
| 5        | 1           |             |           | 898.995093 | 1795.976  | 2         |           |         |       | 1795.970367 | 61.08     | VSHVSTGGGASLELLEGG |           |           |                 |                 |                   |  |
| 5        | 1           |             |           | 898.995093 | 1795.976  | 2         |           |         |       | 1795.970367 | 73.7      | VSHVSTGGGASLELLEGG |           |           |                 |                 |                   |  |
| 5        | 1           |             |           | 905.932141 | 1809.85   | 2         |           |         |       | 1809.844772 | 98.53     | GCITIIGGGDTATCCAK  | 905.9321  | 909.9573  | 4.04            | 1.6             | 2.53              |  |
| 5        | 1           |             |           | 905.932141 | 1809.85   | 2         |           |         |       | 1809.844772 | 92.87     | GCITIIGGGDTATCCAK  |           |           |                 |                 |                   |  |
| 5        | 1           |             |           | 905.932141 | 1809.85   | 2         |           |         |       | 1809.844772 | 106.17    | GCITIIGGGDTATCCAK  |           |           |                 |                 |                   |  |
| 5        | 1           |             |           | 523.535004 | 2090.111  | 4         |           |         |       | 2090.104065 | 44.61     | SVVLMShLGRPDGVMPDK |           |           |                 |                 |                   |  |
| 5        | 2           | IPI00465248 | enolase 1 | 366.724889 | 731.4352  | 2         | 7         | 3.32    | 1.16  | 731.43544   | 34.04     | GVPLYR             | 366.4125  | 368.7375  | 110             | 46.8            | 2.35              |  |
| 5        | 2           |             |           | 366.724894 | 731.4352  | 2         |           |         |       | 731.43544   | 30.2      | GVPLYR             |           |           |                 |                 |                   |  |
| 5        | 2           |             |           | 366.724897 | 731.4352  | 2         |           |         |       | 731.43544   | 35.96     | GVPLYR             |           |           |                 |                 |                   |  |
| 5        | 2           |             |           | 415.255844 | 828.4971  | 2         |           |         |       | 828.498093  | 22.58     | EGLLELLK           |           |           |                 |                 |                   |  |
| 5        | 2           |             |           | 415.255844 | 828.4971  | 2         |           |         |       | 828.498093  | 43.57     | EGLLELLK           |           |           |                 |                 |                   |  |
| 5        | 2           |             |           | 417.746247 | 833.4779  | 2         |           |         |       | 833.478378  | 31.46     | YNQLLR             | 417.7463  | 419.7588  | 52.1            | 24.9            | 2.09              |  |
| 5        | 2           |             |           | 428.72693  | 855.4393  | 2         |           |         |       | 855.440277  | 23.78     | YDLDFK             |           |           |                 |                 |                   |  |
| 5        | 2           |             |           | 428.726934 | 855.4393  | 2         |           |         |       | 855.440277  | 23.16     | YDLDFK             |           |           |                 |                 |                   |  |
| 5        | 2           |             |           | 429.271528 | 856.5285  | 2         |           |         |       | 856.529404  | 39.31     | EGLLELLK           |           |           |                 |                 |                   |  |
| 5        | 2           |             |           | 429.271528 | 856.5285  | 2         |           |         |       | 856.529404  | 41.12     | EGLLELLK           |           |           |                 |                 |                   |  |
| 5        | 2           |             |           | 429.271528 | 856.5285  | 2         |           |         |       | 856.529404  | 36.92     | EGLLELLK           |           |           |                 |                 |                   |  |
| 5        | 2           |             |           | 433.758391 | 865.5022  | 2         |           |         |       | 865.504593  | 28.82     | AVEHINK            |           |           |                 |                 |                   |  |
| 5        | 2           |             |           | 464.297134 | 926.5797  | 2         |           |         |       | 926.582504  | 37.02     | TIAPALVSK          |           |           |                 |                 |                   |  |
| 5        | 2           |             |           | 464.297145 | 926.5797  | 2         |           |         |       | 926.582504  | 49.13     | TIAPALVSK          |           |           |                 |                 |                   |  |
| 5        | 2           |             |           | 464.297198 | 926.5798  | 2         |           |         |       | 926.582504  | 48.14     | TIAPALVSK          |           |           |                 |                 |                   |  |
| 5        | 2           |             |           | 478.313185 | 954.6118  | 2         |           |         |       | 954.613815  | 47.24     | TIAPALVSK          |           |           |                 |                 |                   |  |
| 5        | 2           |             |           | 478.313308 | 954.6121  | 2         |           |         |       | 954.613815  | 39.57     | TIAPALVSK          |           |           |                 |                 |                   |  |
| 5        | 2           |             |           | 478.313555 | 954.6126  | 2         |           |         |       | 954.613815  | 44.5      | TIAPALVSK          |           |           |                 |                 |                   |  |
| 5        | 2           |             |           | 478.313555 | 954.6126  | 2         |           |         |       | 954.613815  | 47.34     | TIAPALVSK          |           |           |                 |                 |                   |  |
| 5        | 2           |             |           | 480.766461 | 959.5184  | 2         |           |         |       | 959.519958  | 29.44     | IEEELGSK           |           |           |                 |                 |                   |  |
| 5        | 2           |             |           | 480.766859 | 959.5192  | 2         |           |         |       | 959.519958  | 30.58     | IEEELGSK           |           |           |                 |                 |                   |  |
| 5        | 2           |             |           | 508.784202 | 1015.554  | 2         |           |         |       | 1015.557419 | 32.87     | LNVTQEKE           |           |           |                 |                 |                   |  |
| 5        | 2           |             |           | 518.270038 | 1034.526  | 2         |           |         |       | 1034.527725 | 40.14     | SCNCLLLK           |           |           |                 |                 |                   |  |
| 5        | 2           |             |           | 532.286004 | 1062.557  | 2         |           |         |       | 1062.559036 | 37.73     | SCNCLLLK           |           |           |                 |                 |                   |  |
| 5        | 2           |             |           | 532.286006 | 1062.557  | 2         |           |         |       | 1062.559036 | 31.98     | SCNCLLLK           |           |           |                 |                 |                   |  |
| 5        | 2           |             |           | 532.286013 | 1062.557  | 2         |           |         |       | 1062.559036 | 25.55     | SCNCLLLK           |           |           |                 |                 |                   |  |
| 5        | 2           |             |           | 572.833507 | 1143.652  | 2         |           |         |       | 1143.652374 | 23.69     | KLNVTEQEK          |           |           |                 |                 |                   |  |
| 5        | 2           |             |           | 572.83351  | 1143.652  | 2         |           |         |       | 1143.652374 | 33.28     | KLNVTEQEK          |           |           |                 |                 |                   |  |
| 5        | 2           |             |           | 586.327899 | 1170.641  | 2         |           |         |       | 1170.64212  | 46.27     | IGAEVYHNLK         |           |           |                 |                 |                   |  |
| 5        | 2           |             |           | 586.327899 | 1170.641  | 2         |           |         |       | 1170.64212  | 42.26     | IGAEVYHNLK         |           |           |                 |                 |                   |  |
| 5        | 2           |             |           | 391.221724 | 1170.643  | 3         |           |         |       | 1170.64212  | 27.82     | IGAEVYHNLK         |           |           |                 |                 |                   |  |
| 5        | 2           |             |           | 391.221726 | 1170.643  | 3         |           |         |       | 1170.64212  | 28        | IGAEVYHNLK         |           |           |                 |                 |                   |  |
| 5        | 2           |             |           | 391.221727 | 1170.643  | 3         |           |         |       | 1170.64212  | 45.28     | IGAEVYHNLK         |           |           |                 |                 |                   |  |
| 5        | 2           |             |           | 586.849164 | 1171.684  | 2         |           |         |       | 1171.683685 | 26.97     | KLNVTEQEK          |           |           |                 |                 |                   |  |
| 5        | 2           |             |           | 586.84943  | 1171.684  | 2         |           |         |       | 1171.683685 | 37.52     | KLNVTEQEK          |           |           |                 |                 |                   |  |
| 5        | 2           |             |           | 586.84943  | 1171.684  | 2         |           |         |       | 1171.683685 | 39.75     | KLNVTEQEK          |           |           |                 |                 |                   |  |



| Band num | prot_hit_nu | prot_acc    | prot_desc                   | pep_exp_mz | pep_exp_n | pep_exp_z | quantific | average | stdev | pep_calc_mr | pep_score | pep_seq                | light m/z | heavy m/z | light intensity | heavy intensity | ratio light/heavy |  |
|----------|-------------|-------------|-----------------------------|------------|-----------|-----------|-----------|---------|-------|-------------|-----------|------------------------|-----------|-----------|-----------------|-----------------|-------------------|--|
| 5        | 2           |             |                             | 586.84943  | 1171.684  | 2         |           |         |       | 1171.683685 | 32.61     | KLNIVTEQEK             |           |           |                 |                 |                   |  |
| 5        | 2           |             |                             | 600.344297 | 1198.674  | 2         |           |         |       | 1198.673431 | 67.78     | IGAEVYHNLK             | 600.3443  | 604.3694  | 31.3            | 10.4            | 3.01              |  |
| 5        | 2           |             |                             | 600.344297 | 1198.674  | 2         |           |         |       | 1198.673431 | 50.24     | IGAEVYHNLK             |           |           |                 |                 |                   |  |
| 5        | 2           |             |                             | 600.344308 | 1198.674  | 2         |           |         |       | 1198.673431 | 62.52     | IGAEVYHNLK             |           |           |                 |                 |                   |  |
| 5        | 2           |             |                             | 400.565675 | 1198.675  | 3         |           |         |       | 1198.673431 | 30.04     | IGAEVYHNLK             |           |           |                 |                 |                   |  |
| 5        | 2           |             |                             | 400.565675 | 1198.675  | 3         |           |         |       | 1198.673431 | 39.05     | IGAEVYHNLK             |           |           |                 |                 |                   |  |
| 5        | 2           |             |                             | 400.565675 | 1198.675  | 3         |           |         |       | 1198.673431 | 35.88     | IGAEVYHNLK             |           |           |                 |                 |                   |  |
| 5        | 2           |             |                             | 400.565676 | 1198.675  | 3         |           |         |       | 1198.673431 | 46.78     | IGAEVYHNLK             |           |           |                 |                 |                   |  |
| 5        | 2           |             |                             | 654.814534 | 1307.615  | 2         |           |         |       | 1307.612549 | 62.41     | LMIEMDGTENK            |           |           |                 |                 |                   |  |
| 5        | 2           |             |                             | 654.814534 | 1307.615  | 2         |           |         |       | 1307.612549 | 62.75     | LMIEMDGTENK            |           |           |                 |                 |                   |  |
| 5        | 2           |             |                             | 654.814534 | 1307.615  | 2         |           |         |       | 1307.612549 | 62.86     | LMIEMDGTENK            |           |           |                 |                 |                   |  |
| 5        | 2           |             |                             | 662.812791 | 1323.611  | 2         |           |         |       | 1323.607468 | 46.13     | LMIEMDGTENK            |           |           |                 |                 |                   |  |
| 5        | 2           |             |                             | 668.830269 | 1335.646  | 2         |           |         |       | 1335.64386  | 73.08     | LMIEMDGTENK            | 668.8303  | 672.8554  | 18.8            | 3.56            | 5.28              |  |
| 5        | 2           |             |                             | 668.830307 | 1335.646  | 2         |           |         |       | 1335.64386  | 57.33     | LMIEMDGTENK            |           |           |                 |                 |                   |  |
| 5        | 2           |             |                             | 668.830307 | 1335.646  | 2         |           |         |       | 1335.64386  | 45.92     | LMIEMDGTENK            |           |           |                 |                 |                   |  |
| 5        | 2           |             |                             | 676.829325 | 1351.644  | 2         |           |         |       | 1351.638779 | 33.63     | LMIEMDGTENK            |           |           |                 |                 |                   |  |
| 5        | 2           |             |                             | 676.829325 | 1351.644  | 2         |           |         |       | 1351.638779 | 29.43     | LMIEMDGTENK            |           |           |                 |                 |                   |  |
| 5        | 2           |             |                             | 676.829325 | 1351.644  | 2         |           |         |       | 1351.638779 | 34.29     | LMIEMDGTENK            |           |           |                 |                 |                   |  |
| 5        | 2           |             |                             | 518.605563 | 1552.795  | 3         |           |         |       | 1552.79567  | 74.85     | LAQANGWGMVSHR          | 518.6056  | 519.9473  | 26.3            | 5.86            | 4.49              |  |
| 5        | 2           |             |                             | 777.409939 | 1552.805  | 2         |           |         |       | 1552.79567  | 73.5      | LAQANGWGMVSHR          |           |           |                 |                 |                   |  |
| 5        | 2           |             |                             | 523.937193 | 1568.79   | 3         |           |         |       | 1568.790588 | 58.48     | LAQANGWGMVSHR          |           |           |                 |                 |                   |  |
| 5        | 2           |             |                             | 523.937193 | 1568.79   | 3         |           |         |       | 1568.790588 | 43.65     | LAQANGWGMVSHR          |           |           |                 |                 |                   |  |
| 5        | 2           |             |                             | 831.434504 | 1660.854  | 2         |           |         |       | 1660.847839 | 118.1     | VNIGSVTESLQACK         |           |           |                 |                 |                   |  |
| 5        | 2           |             |                             | 831.434504 | 1660.854  | 2         |           |         |       | 1660.847839 | 115.03    | VNIGSVTESLQACK         |           |           |                 |                 |                   |  |
| 5        | 2           |             |                             | 831.434504 | 1660.854  | 2         |           |         |       | 1660.847839 | 104.33    | VNIGSVTESLQACK         |           |           |                 |                 |                   |  |
| 5        | 2           |             |                             | 831.434506 | 1660.854  | 2         |           |         |       | 1660.847839 | 104.02    | VNIGSVTESLQACK         |           |           |                 |                 |                   |  |
| 5        | 2           |             |                             | 563.967693 | 1688.881  | 3         |           |         |       | 1688.87915  | 36.35     | VNIGSVTESLQACK         |           |           |                 |                 |                   |  |
| 5        | 2           |             |                             | 563.967693 | 1688.881  | 3         |           |         |       | 1688.87915  | 37.39     | VNIGSVTESLQACK         |           |           |                 |                 |                   |  |
| 5        | 2           |             |                             | 845.449868 | 1688.885  | 2         |           |         |       | 1688.87915  | 108.34    | VNIGSVTESLQACK         | 845.4499  | 849.475   | 30              | 10.9            | 2.75              |  |
| 5        | 2           |             |                             | 845.449868 | 1688.885  | 2         |           |         |       | 1688.87915  | 129.14    | VNIGSVTESLQACK         |           |           |                 |                 |                   |  |
| 5        | 2           |             |                             | 845.449868 | 1688.885  | 2         |           |         |       | 1688.87915  | 112.16    | VNIGSVTESLQACK         |           |           |                 |                 |                   |  |
| 5        | 2           |             |                             | 845.449868 | 1688.885  | 2         |           |         |       | 1688.87915  | 35.07     | VNIGSVTESLQACK         |           |           |                 |                 |                   |  |
| 5        | 2           |             |                             | 845.449868 | 1688.885  | 2         |           |         |       | 1688.87915  | 124.07    | VNIGSVTESLQACK         |           |           |                 |                 |                   |  |
| 5        | 2           |             |                             | 794.407397 | 2380.2    | 3         |           |         |       | 2380.185593 | 34.1      | SGETEDTFIADLVVGLCTGQIK |           |           |                 |                 |                   |  |
| 5        | 2           |             |                             | 803.750562 | 2408.23   | 3         |           |         |       | 2408.216904 | 42.34     | SGETEDTFIADLVVGLCTGQIK | 803.7506  | 806.434   | 0.98            | 0.3             | 3.27              |  |
| 5        | 3           | IPI00396485 | Elongation factor 1-alpha 1 | 448.260384 | 894.5062  | 2         | 3         | 4.57    | 1.30  | 894.508682  | 25        | EVSTYIK                |           |           |                 |                 |                   |  |
| 5        | 3           |             |                             | 448.260391 | 894.5062  | 2         |           |         |       | 894.508682  | 33.2      | EVSTYIK                |           |           |                 |                 |                   |  |
| 5        | 3           |             |                             | 449.790474 | 897.5664  | 2         |           |         |       | 897.567169  | 40.52     | QLIVGVNKK              |           |           |                 |                 |                   |  |
| 5        | 3           |             |                             | 449.790474 | 897.5664  | 2         |           |         |       | 897.567169  | 40.32     | QLIVGVNKK              |           |           |                 |                 |                   |  |
| 5        | 3           |             |                             | 471.803593 | 941.5926  | 2         |           |         |       | 941.593384  | 53.89     | QTVAVGVK               |           |           |                 |                 |                   |  |
| 5        | 3           |             |                             | 471.803593 | 941.5926  | 2         |           |         |       | 941.593384  | 45.27     | QTVAVGVK               |           |           |                 |                 |                   |  |
| 5        | 3           |             |                             | 485.818107 | 969.6217  | 2         |           |         |       | 969.624695  | 36.06     | QTVAVGVK               |           |           |                 |                 |                   |  |
| 5        | 3           |             |                             | 502.295342 | 1002.576  | 2         |           |         |       | 1002.577423 | 25.46     | LPLQDVYK               |           |           |                 |                 |                   |  |
| 5        | 3           |             |                             | 516.311248 | 1030.608  | 2         |           |         |       | 1030.608734 | 20.99     | LPLQDVYK               |           |           |                 |                 |                   |  |
| 5        | 3           |             |                             | 527.325078 | 1052.636  | 2         |           |         |       | 1052.636627 | 57.98     | IGGIGTVPVGR            |           |           |                 |                 |                   |  |
| 5        | 3           |             |                             | 527.325078 | 1052.636  | 2         |           |         |       | 1052.636627 | 56.16     | IGGIGTVPVGR            |           |           |                 |                 |                   |  |
| 5        | 3           |             |                             | 527.325081 | 1052.636  | 2         |           |         |       | 1052.636627 | 56.5      | IGGIGTVPVGR            |           |           |                 |                 |                   |  |
| 5        | 3           |             |                             | 527.325081 | 1052.636  | 2         |           |         |       | 1052.636627 | 52.46     | IGGIGTVPVGR            |           |           |                 |                 |                   |  |
| 5        | 3           |             |                             | 383.548722 | 1147.624  | 3         |           |         |       | 1147.626175 | 35.16     | STTTGHLIYK             | 383.5487  | 384.8904  | 3.89            | 0.66            | 5.89              |  |
| 5        | 3           |             |                             | 383.548737 | 1147.624  | 3         |           |         |       | 1147.626175 | 59.93     | STTTGHLIYK             |           |           |                 |                 |                   |  |
| 5        | 3           |             |                             | 574.819676 | 1147.625  | 2         |           |         |       | 1147.626175 | 33.8      | STTTGHLIYK             |           |           |                 |                 |                   |  |
| 5        | 3           |             |                             | 574.820241 | 1147.626  | 2         |           |         |       | 1147.626175 | 38.27     | STTTGHLIYK             |           |           |                 |                 |                   |  |
| 5        | 3           |             |                             | 392.893256 | 1175.658  | 3         |           |         |       | 1175.657486 | 33.01     | STTTGHLIYK             |           |           |                 |                 |                   |  |
| 5        | 3           |             |                             | 392.893256 | 1175.658  | 3         |           |         |       | 1175.657486 | 46.81     | STTTGHLIYK             |           |           |                 |                 |                   |  |
| 5        | 3           |             |                             | 392.893256 | 1175.658  | 3         |           |         |       | 1175.657486 | 30.1      | STTTGHLIYK             |           |           |                 |                 |                   |  |
| 5        | 3           |             |                             | 588.836751 | 1175.659  | 2         |           |         |       | 1175.657486 | 51.14     | STTTGHLIYK             |           |           |                 |                 |                   |  |
| 5        | 3           |             |                             | 588.836751 | 1175.659  | 2         |           |         |       | 1175.657486 | 51.62     | STTTGHLIYK             |           |           |                 |                 |                   |  |
| 5        | 3           |             |                             | 588.836751 | 1175.659  | 2         |           |         |       | 1175.657486 | 44.09     | STTTGHLIYK             |           |           |                 |                 |                   |  |
| 5        | 3           |             |                             | 671.893208 | 1341.772  | 2         |           |         |       | 1341.768051 | 54.84     | EHALLAYTLGVK           |           |           |                 |                 |                   |  |
| 5        | 3           |             |                             | 685.908149 | 1369.802  | 2         |           |         |       | 1369.799362 | 63.6      | EHALLAYTLGVK           | 685.9082  | 689.9333  | 3.02            | 0.67            | 4.51              |  |
| 5        | 3           |             |                             | 685.908149 | 1369.802  | 2         |           |         |       | 1369.799362 | 30.66     | EHALLAYTLGVK           |           |           |                 |                 |                   |  |
| 5        | 3           |             |                             | 478.25804  | 1431.752  | 3         |           |         |       | 1431.753479 | 54.83     | YVVTIIDAPGHR           |           |           |                 |                 |                   |  |
| 5        | 3           |             |                             | 478.25804  | 1431.752  | 3         |           |         |       | 1431.753479 | 47.21     | YVVTIIDAPGHR           |           |           |                 |                 |                   |  |

| Band num | prot_hit | nu          | prot_acc | prot_desc                                   | pep_exp_mz | pep_exp_n | pep_exp_z | quantific | average | stdev | pep_calc_mr | pep_score | pep_seq      | light m/z | heavy m/z | light intensity | heavy intensity | ratio light/heavy |
|----------|----------|-------------|----------|---------------------------------------------|------------|-----------|-----------|-----------|---------|-------|-------------|-----------|--------------|-----------|-----------|-----------------|-----------------|-------------------|
| 5        | 3        |             |          |                                             | 478.258043 | 1431.752  | 3         |           |         |       | 1431.753479 | 31        | YYVTIIDAPGHR |           |           |                 |                 |                   |
| 5        | 3        |             |          |                                             | 716.886465 | 1431.758  | 2         |           |         |       | 1431.753479 | 49.68     | YYVTIIDAPGHR | 716.8865  | 718.899   | 5.44            | 1.65            | 3.30              |
| 5        | 3        |             |          |                                             | 716.886465 | 1431.758  | 2         |           |         |       | 1431.753479 | 60.7      | YYVTIIDAPGHR |           |           |                 |                 |                   |
| 5        | 3        |             |          |                                             | 747.869351 | 1493.724  | 2         |           |         |       | 1493.720886 | 31.96     | MDSTEPPYSQKR |           |           |                 |                 |                   |
| 5        | 3        |             |          |                                             | 747.869473 | 1493.724  | 2         |           |         |       | 1493.720886 | 26.41     | MDSTEPPYSQKR |           |           |                 |                 |                   |
| 5        | 3        |             |          |                                             | 747.869595 | 1493.725  | 2         |           |         |       | 1493.720886 | 34.78     | MDSTEPPYSQKR |           |           |                 |                 |                   |
| 5        | 3        | IPI00472724 |          | Eukaryotic translation elongation factor 1B | 448.260384 | 894.5062  | 2         | 3         | 4.57    | 1.30  | 894.508682  | 25        | EVSTYIK      |           |           |                 |                 |                   |
| 5        | 3        |             |          |                                             | 448.260391 | 894.5062  | 2         |           |         |       | 894.508682  | 33.2      | EVSTYIK      |           |           |                 |                 |                   |
| 5        | 3        |             |          |                                             | 449.790474 | 897.5664  | 2         |           |         |       | 897.567169  | 40.52     | QLIVGVNKK    |           |           |                 |                 |                   |
| 5        | 3        |             |          |                                             | 449.790474 | 897.5664  | 2         |           |         |       | 897.567169  | 40.32     | QLIVGVNKK    |           |           |                 |                 |                   |
| 5        | 3        |             |          |                                             | 471.803593 | 941.5926  | 2         |           |         |       | 941.593384  | 53.89     | QTVAVGVIIK   |           |           |                 |                 |                   |
| 5        | 3        |             |          |                                             | 471.803593 | 941.5926  | 2         |           |         |       | 941.593384  | 45.27     | QTVAVGVIIK   |           |           |                 |                 |                   |
| 5        | 3        |             |          |                                             | 485.818107 | 969.6217  | 2         |           |         |       | 969.624695  | 36.06     | QTVAVGVIIK   |           |           |                 |                 |                   |
| 5        | 3        |             |          |                                             | 502.295342 | 1002.576  | 2         |           |         |       | 1002.577423 | 25.46     | LPLQDVYK     |           |           |                 |                 |                   |
| 5        | 3        |             |          |                                             | 516.311248 | 1030.608  | 2         |           |         |       | 1030.608734 | 20.99     | LPLQDVYK     |           |           |                 |                 |                   |
| 5        | 3        |             |          |                                             | 527.325078 | 1052.636  | 2         |           |         |       | 1052.636627 | 57.98     | IGGIGTVPVGR  |           |           |                 |                 |                   |
| 5        | 3        |             |          |                                             | 527.325078 | 1052.636  | 2         |           |         |       | 1052.636627 | 56.16     | IGGIGTVPVGR  |           |           |                 |                 |                   |
| 5        | 3        |             |          |                                             | 527.325081 | 1052.636  | 2         |           |         |       | 1052.636627 | 56.5      | IGGIGTVPVGR  |           |           |                 |                 |                   |
| 5        | 3        |             |          |                                             | 527.325081 | 1052.636  | 2         |           |         |       | 1052.636627 | 52.46     | IGGIGTVPVGR  |           |           |                 |                 |                   |
| 5        | 3        |             |          |                                             | 383.548722 | 1147.624  | 3         |           |         |       | 1147.626175 | 35.16     | STTTGHLIYK   |           |           |                 |                 |                   |
| 5        | 3        |             |          |                                             | 383.548737 | 1147.624  | 3         |           |         |       | 1147.626175 | 59.93     | STTTGHLIYK   |           |           |                 |                 |                   |
| 5        | 3        |             |          |                                             | 574.819676 | 1147.625  | 2         |           |         |       | 1147.626175 | 33.8      | STTTGHLIYK   |           |           |                 |                 |                   |
| 5        | 3        |             |          |                                             | 574.820241 | 1147.626  | 2         |           |         |       | 1147.626175 | 38.27     | STTTGHLIYK   |           |           |                 |                 |                   |
| 5        | 3        |             |          |                                             | 392.893256 | 1175.658  | 3         |           |         |       | 1175.657486 | 33.01     | STTTGHLIYK   |           |           |                 |                 |                   |
| 5        | 3        |             |          |                                             | 392.893256 | 1175.658  | 3         |           |         |       | 1175.657486 | 46.81     | STTTGHLIYK   |           |           |                 |                 |                   |
| 5        | 3        |             |          |                                             | 392.893256 | 1175.658  | 3         |           |         |       | 1175.657486 | 30.1      | STTTGHLIYK   |           |           |                 |                 |                   |
| 5        | 3        |             |          |                                             | 588.836751 | 1175.659  | 2         |           |         |       | 1175.657486 | 51.14     | STTTGHLIYK   |           |           |                 |                 |                   |
| 5        | 3        |             |          |                                             | 588.836751 | 1175.659  | 2         |           |         |       | 1175.657486 | 51.62     | STTTGHLIYK   |           |           |                 |                 |                   |
| 5        | 3        |             |          |                                             | 588.836751 | 1175.659  | 2         |           |         |       | 1175.657486 | 44.09     | STTTGHLIYK   |           |           |                 |                 |                   |
| 5        | 3        |             |          |                                             | 671.893208 | 1341.772  | 2         |           |         |       | 1341.768051 | 54.84     | EHALLAYTLGVK |           |           |                 |                 |                   |
| 5        | 3        |             |          |                                             | 685.908149 | 1369.802  | 2         |           |         |       | 1369.799362 | 63.6      | EHALLAYTLGVK |           |           |                 |                 |                   |
| 5        | 3        |             |          |                                             | 685.908149 | 1369.802  | 2         |           |         |       | 1369.799362 | 30.66     | EHALLAYTLGVK |           |           |                 |                 |                   |
| 5        | 3        |             |          |                                             | 478.25804  | 1431.752  | 3         |           |         |       | 1431.753479 | 54.83     | YYVTIIDAPGHR |           |           |                 |                 |                   |
| 5        | 3        |             |          |                                             | 478.25804  | 1431.752  | 3         |           |         |       | 1431.753479 | 47.21     | YYVTIIDAPGHR |           |           |                 |                 |                   |
| 5        | 3        |             |          |                                             | 478.258043 | 1431.752  | 3         |           |         |       | 1431.753479 | 31        | YYVTIIDAPGHR |           |           |                 |                 |                   |
| 5        | 3        |             |          |                                             | 716.886465 | 1431.758  | 2         |           |         |       | 1431.753479 | 49.68     | YYVTIIDAPGHR |           |           |                 |                 |                   |
| 5        | 3        |             |          |                                             | 716.886465 | 1431.758  | 2         |           |         |       | 1431.753479 | 60.7      | YYVTIIDAPGHR |           |           |                 |                 |                   |
| 5        | 3        |             |          |                                             | 747.869351 | 1493.724  | 2         |           |         |       | 1493.720886 | 31.96     | MDSTEPPYSQKR |           |           |                 |                 |                   |
| 5        | 3        |             |          |                                             | 747.869473 | 1493.724  | 2         |           |         |       | 1493.720886 | 26.41     | MDSTEPPYSQKR |           |           |                 |                 |                   |
| 5        | 3        |             |          |                                             | 747.869595 | 1493.725  | 2         |           |         |       | 1493.720886 | 34.78     | MDSTEPPYSQKR |           |           |                 |                 |                   |
| 5        | 4        | IPI00554788 |          | 49 kDa protein                              | 373.716344 | 745.4181  | 2         | 3         | 1.43    | 0.54  | 745.418091  | 23.01     | IMADIR       |           |           |                 |                 |                   |
| 5        | 4        |             |          |                                             | 746.426434 | 745.4192  | 1         |           |         |       | 745.418091  | 25.51     | IMADIR       |           |           |                 |                 |                   |
| 5        | 4        |             |          |                                             | 418.220558 | 834.4266  | 2         |           |         |       | 834.42601   | 24.83     | LAADDFR      |           |           |                 |                 |                   |
| 5        | 4        |             |          |                                             | 433.243446 | 864.4723  | 2         |           |         |       | 864.472961  | 29.99     | LASYLDR      |           |           |                 |                 |                   |
| 5        | 4        |             |          |                                             | 433.243446 | 864.4723  | 2         |           |         |       | 864.472961  | 37.13     | LASYLDR      |           |           |                 |                 |                   |
| 5        | 4        |             |          |                                             | 433.243451 | 864.4724  | 2         |           |         |       | 864.472961  | 42.04     | LASYLDR      |           |           |                 |                 |                   |
| 5        | 4        |             |          |                                             | 459.256889 | 916.4992  | 2         |           |         |       | 916.500229  | 30.8      | ASLENSLR     |           |           |                 |                 |                   |
| 5        | 4        |             |          |                                             | 459.256889 | 916.4992  | 2         |           |         |       | 916.500229  | 45.06     | ASLENSLR     |           |           |                 |                 |                   |
| 5        | 4        |             |          |                                             | 497.254212 | 992.4939  | 2         |           |         |       | 992.495148  | 36.62     | AQYDELAR     |           |           |                 |                 |                   |
| 5        | 4        |             |          |                                             | 497.254231 | 992.4939  | 2         |           |         |       | 992.495148  | 39.79     | AQYDELAR     |           |           |                 |                 |                   |
| 5        | 4        |             |          |                                             | 502.245308 | 1002.476  | 2         |           |         |       | 1002.479507 | 27.89     | STFSTNYR     |           |           |                 |                 |                   |
| 5        | 4        |             |          |                                             | 502.245308 | 1002.476  | 2         |           |         |       | 1002.479507 | 21.1      | STFSTNYR     |           |           |                 |                 |                   |
| 5        | 4        |             |          |                                             | 502.245727 | 1002.477  | 2         |           |         |       | 1002.479507 | 44.82     | STFSTNYR     |           |           |                 |                 |                   |
| 5        | 4        |             |          |                                             | 535.322673 | 1068.631  | 2         |           |         |       | 1068.631577 | 53.16     | IVLQIDNAR    | 535.3227  | 537.3352  | 56.8            | 33.1            | 1.72              |
| 5        | 4        |             |          |                                             | 535.322673 | 1068.631  | 2         |           |         |       | 1068.631577 | 59.33     | IVLQIDNAR    |           |           |                 |                 |                   |
| 5        | 4        |             |          |                                             | 535.322674 | 1068.631  | 2         |           |         |       | 1068.631577 | 54.4      | IVLQIDNAR    |           |           |                 |                 |                   |
| 5        | 4        |             |          |                                             | 537.793598 | 1073.573  | 2         |           |         |       | 1073.574142 | 30.81     | VIDDTNITR    |           |           |                 |                 |                   |
| 5        | 4        |             |          |                                             | 537.793598 | 1073.573  | 2         |           |         |       | 1073.574142 | 40.69     | VIDDTNITR    |           |           |                 |                 |                   |
| 5        | 4        |             |          |                                             | 537.793598 | 1073.573  | 2         |           |         |       | 1073.574142 | 44.6      | VIDDTNITR    |           |           |                 |                 |                   |
| 5        | 4        |             |          |                                             | 547.298904 | 1092.583  | 2         |           |         |       | 1092.583954 | 36.25     | LEAEIATYR    |           |           |                 |                 |                   |
| 5        | 4        |             |          |                                             | 547.298904 | 1092.583  | 2         |           |         |       | 1092.583954 | 37.49     | LEAEIATYR    |           |           |                 |                 |                   |
| 5        | 4        |             |          |                                             | 561.268324 | 1120.522  | 2         |           |         |       | 1120.520721 | 36.15     | ETMQSLNDR    |           |           |                 |                 |                   |
| 5        | 4        |             |          |                                             | 432.5621   | 1294.664  | 3         |           |         |       | 1294.66539  | 31.52     | QSVENDIHGLR  |           |           |                 |                 |                   |

| Band num | prot_hit | nu prot_acc | prot_desc                    | pep_exp_mz     | pep_exp_n  | pep_exp_z | quantific | average | stdev       | pep_calc_mr | pep_score     | pep_seq        | light m/z | heavy m/z | light intensity | heavy intensity | ratio light/heavy |  |
|----------|----------|-------------|------------------------------|----------------|------------|-----------|-----------|---------|-------------|-------------|---------------|----------------|-----------|-----------|-----------------|-----------------|-------------------|--|
| 5        | 4        |             |                              | 432.5621       | 1294.664   | 3         |           |         |             | 1294.66539  | 22.44         | QSVENDIHGLR    |           |           |                 |                 |                   |  |
| 5        | 4        |             |                              | 674.357181     | 1346.7     | 2         |           |         |             | 1346.696686 | 58.74         | AQIFANTVDNAR   | 674.3572  | 676.3697  | 22.4            | 12.7            | 1.76              |  |
| 5        | 4        |             |                              | 674.357181     | 1346.7     | 2         |           |         |             | 1346.696686 | 65.16         | AQIFANTVDNAR   |           |           |                 |                 |                   |  |
| 5        | 4        |             |                              | 674.357185     | 1346.7     | 2         |           |         |             | 1346.696686 | 72.41         | AQIFANTVDNAR   |           |           |                 |                 |                   |  |
| 5        | 4        |             |                              | 363.706168     | 1450.796   | 4         |           |         |             | 1450.791656 | 22.58         | QSVENDIHGLRK   |           |           |                 |                 |                   |  |
| 5        | 4        |             |                              | 775.897592     | 1549.781   | 2         |           |         |             | 1549.768219 | 85.65         | TVQSLEIDLDSMR  | 775.8976  | 777.9102  | 6.86            | 8.56            | 0.80              |  |
| 5        | 4        |             |                              | 775.897592     | 1549.781   | 2         |           |         |             | 1549.768219 | 83            | TVQSLEIDLDSMR  |           |           |                 |                 |                   |  |
| 5        | 4        | IPI00784347 | Keratin, type I cytoskeletal | 373.716344     | 745.4181   | 2         | 3         | 1.43    | 0.54        | 745.418091  | 23.01         | IMADIR         |           |           |                 |                 |                   |  |
| 5        | 4        |             |                              | 746.426434     | 745.4192   | 1         |           |         |             | 745.418091  | 25.51         | IMADIR         |           |           |                 |                 |                   |  |
| 5        | 4        |             |                              | 418.220558     | 834.4266   | 2         |           |         |             | 834.42601   | 24.83         | LAADDFR        |           |           |                 |                 |                   |  |
| 5        | 4        |             |                              | 433.243446     | 864.4723   | 2         |           |         |             | 864.472961  | 29.99         | LASYLDR        |           |           |                 |                 |                   |  |
| 5        | 4        |             |                              | 433.243446     | 864.4723   | 2         |           |         |             | 864.472961  | 37.13         | LASYLDR        |           |           |                 |                 |                   |  |
| 5        | 4        |             |                              | 433.243451     | 864.4724   | 2         |           |         |             | 864.472961  | 42.04         | LASYLDR        |           |           |                 |                 |                   |  |
| 5        | 4        |             |                              | 459.256889     | 916.4992   | 2         |           |         |             | 916.500229  | 30.8          | ASLENSLR       |           |           |                 |                 |                   |  |
| 5        | 4        |             |                              | 459.256889     | 916.4992   | 2         |           |         |             | 916.500229  | 45.06         | ASLENSLR       |           |           |                 |                 |                   |  |
| 5        | 4        |             |                              | 497.254212     | 992.4939   | 2         |           |         |             | 992.495148  | 36.62         | AQYDELAR       |           |           |                 |                 |                   |  |
| 5        | 4        |             |                              | 497.254231     | 992.4939   | 2         |           |         |             | 992.495148  | 39.79         | AQYDELAR       |           |           |                 |                 |                   |  |
| 5        | 4        |             |                              | 502.245308     | 1002.476   | 2         |           |         |             | 1002.479507 | 27.89         | STFSTNYR       |           |           |                 |                 |                   |  |
| 5        | 4        |             |                              | 502.245308     | 1002.476   | 2         |           |         |             | 1002.479507 | 21.1          | STFSTNYR       |           |           |                 |                 |                   |  |
| 5        | 4        |             |                              | 502.245727     | 1002.477   | 2         |           |         |             | 1002.479507 | 44.82         | STFSTNYR       |           |           |                 |                 |                   |  |
| 5        | 4        |             |                              | 535.322673     | 1068.631   | 2         |           |         |             | 1068.631577 | 53.16         | IVLQIDNAR      |           |           |                 |                 |                   |  |
| 5        | 4        |             |                              | 535.322673     | 1068.631   | 2         |           |         |             | 1068.631577 | 59.33         | IVLQIDNAR      |           |           |                 |                 |                   |  |
| 5        | 4        |             |                              | 535.322674     | 1068.631   | 2         |           |         |             | 1068.631577 | 54.4          | IVLQIDNAR      |           |           |                 |                 |                   |  |
| 5        | 4        |             |                              | 537.793598     | 1073.573   | 2         |           |         |             | 1073.574142 | 30.81         | VIDDTNITR      |           |           |                 |                 |                   |  |
| 5        | 4        |             |                              | 537.793598     | 1073.573   | 2         |           |         |             | 1073.574142 | 40.69         | VIDDTNITR      |           |           |                 |                 |                   |  |
| 5        | 4        |             |                              | 537.793598     | 1073.573   | 2         |           |         |             | 1073.574142 | 44.6          | VIDDTNITR      |           |           |                 |                 |                   |  |
| 5        | 4        |             |                              | 547.298904     | 1092.583   | 2         |           |         |             | 1092.583954 | 36.25         | LEAEIATYR      |           |           |                 |                 |                   |  |
| 5        | 4        |             |                              | 547.298904     | 1092.583   | 2         |           |         |             | 1092.583954 | 37.49         | LEAEIATYR      |           |           |                 |                 |                   |  |
| 5        | 4        |             |                              | 561.268324     | 1120.522   | 2         |           |         |             | 1120.520721 | 36.15         | ETMQSLNDR      |           |           |                 |                 |                   |  |
| 5        | 4        |             |                              | 432.5621       | 1294.664   | 3         |           |         |             | 1294.66539  | 31.52         | QSVENDIHGLR    |           |           |                 |                 |                   |  |
| 5        | 4        |             |                              | 432.5621       | 1294.664   | 3         |           |         |             | 1294.66539  | 22.44         | QSVENDIHGLR    |           |           |                 |                 |                   |  |
| 5        | 4        |             |                              | 674.357181     | 1346.7     | 2         |           |         |             | 1346.696686 | 58.74         | AQIFANTVDNAR   |           |           |                 |                 |                   |  |
| 5        | 4        |             |                              | 674.357181     | 1346.7     | 2         |           |         |             | 1346.696686 | 65.16         | AQIFANTVDNAR   |           |           |                 |                 |                   |  |
| 5        | 4        |             |                              | 674.357185     | 1346.7     | 2         |           |         |             | 1346.696686 | 72.41         | AQIFANTVDNAR   |           |           |                 |                 |                   |  |
| 5        | 4        |             | 363.706168                   | 1450.796       | 4          |           |           |         | 1450.791656 | 22.58       | QSVENDIHGLRK  |                |           |           |                 |                 |                   |  |
| 5        | 4        |             | 775.897592                   | 1549.781       | 2          |           |           |         | 1549.768219 | 85.65       | TVQSLEIDLDSMR |                |           |           |                 |                 |                   |  |
| 5        | 4        |             | 775.897592                   | 1549.781       | 2          |           |           |         | 1549.768219 | 83          | TVQSLEIDLDSMR |                |           |           |                 |                 |                   |  |
| 5        | 5        | IPI00000875 | Elongation factor 1-gamma    | 425.246088     | 848.4776   | 2         | 4         | 2.19    | 0.35        | 848.478027  | 25.66         | TFLVGER        |           |           |                 |                 |                   |  |
| 5        | 5        |             |                              | 502.282568     | 1002.551   | 2         |           |         |             | 1002.552261 | 28.05         | QVLEPSFR       | 502.2826  | 504.2951  | 12.9            | 6.5             | 1.98              |  |
| 5        | 5        |             |                              | 423.900413     | 1268.679   | 3         |           |         |             | 1268.678909 | 44.44         | STFVLEFKR      | 423.9004  | 425.2421  | 2.02            | 1.09            | 1.85              |  |
| 5        | 5        |             |                              | 688.392972     | 1374.771   | 2         |           |         |             | 1374.764359 | 99.47         | ALIAAQYSGAQVR  | 688.393   | 690.4055  | 3.08            | 1.16            | 2.66              |  |
| 5        | 5        |             |                              | 688.392972     | 1374.771   | 2         |           |         |             | 1374.764359 | 91.89         | ALIAAQYSGAQVR  |           |           |                 |                 |                   |  |
| 5        | 5        |             |                              | 736.889353     | 1471.764   | 2         |           |         |             | 1471.754272 | 42.63         | LDPGSEETQLVR   | 736.8894  | 738.9019  | 1.45            | 0.64            | 2.27              |  |
| 5        | 5        |             |                              | 800.9355       | 1599.856   | 2         |           |         |             | 1599.849228 | 42.23         | KLDPGSEETQLVR  |           |           |                 |                 |                   |  |
| 5        | 5        |             |                              | 814.950661     | 1627.887   | 2         |           |         |             | 1627.880539 | 26.74         | KLDPGSEETQLVR  |           |           |                 |                 |                   |  |
| 5        | 5        |             |                              | 434.73199      | 1734.899   | 4         |           |         |             | 1734.897842 | 36.58         | VLSAPPHHFGQTNR |           |           |                 |                 |                   |  |
| 5        | 5        |             |                              | 434.731992     | 1734.899   | 4         |           |         |             | 1734.897842 | 54.1          | VLSAPPHHFGQTNR |           |           |                 |                 |                   |  |
| 5        | 5        |             |                              | 434.732003     | 1734.899   | 4         |           |         |             | 1734.897842 | 48.62         | VLSAPPHHFGQTNR |           |           |                 |                 |                   |  |
| 5        | 5        |             |                              | 579.307436     | 1734.9     | 3         |           |         |             | 1734.897842 | 34.64         | VLSAPPHHFGQTNR |           |           |                 |                 |                   |  |
| 5        | 5        |             |                              | 579.307472     | 1734.901   | 3         |           |         |             | 1734.897842 | 26.63         | VLSAPPHHFGQTNR |           |           |                 |                 |                   |  |
| 5        | 5        | IPI00747497 |                              | 50 kDa protein | 425.246088 | 848.4776  | 2         | 4       | 2.19        | 0.35        | 848.478027    | 25.66          | TFLVGER   |           |                 |                 |                   |  |
| 5        | 5        |             |                              |                | 502.282568 | 1002.551  | 2         |         |             |             | 1002.552261   | 28.05          | QVLEPSFR  |           |                 |                 |                   |  |
| 5        | 5        |             | 423.900413                   |                | 1268.679   | 3         |           |         |             | 1268.678909 | 44.44         | STFVLEFKR      |           |           |                 |                 |                   |  |
| 5        | 5        |             | 688.392972                   |                | 1374.771   | 2         |           |         |             | 1374.764359 | 99.47         | ALIAAQYSGAQVR  |           |           |                 |                 |                   |  |
| 5        | 5        |             | 688.392972                   |                | 1374.771   | 2         |           |         |             | 1374.764359 | 91.89         | ALIAAQYSGAQVR  |           |           |                 |                 |                   |  |
| 5        | 5        |             | 736.889353                   |                | 1471.764   | 2         |           |         |             | 1471.754272 | 42.63         | LDPGSEETQLVR   |           |           |                 |                 |                   |  |
| 5        | 5        |             | 800.9355                     |                | 1599.856   | 2         |           |         |             | 1599.849228 | 42.23         | KLDPGSEETQLVR  |           |           |                 |                 |                   |  |
| 5        | 5        |             | 814.950661                   |                | 1627.887   | 2         |           |         |             | 1627.880539 | 26.74         | KLDPGSEETQLVR  |           |           |                 |                 |                   |  |
| 5        | 5        |             | 434.73199                    |                | 1734.899   | 4         |           |         |             | 1734.897842 | 36.58         | VLSAPPHHFGQTNR |           |           |                 |                 |                   |  |
| 5        | 5        |             | 434.731992                   |                | 1734.899   | 4         |           |         |             | 1734.897842 | 54.1          | VLSAPPHHFGQTNR |           |           |                 |                 |                   |  |
| 5        | 5        |             | 434.732003                   |                | 1734.899   | 4         |           |         |             | 1734.897842 | 48.62         | VLSAPPHHFGQTNR |           |           |                 |                 |                   |  |
| 5        | 5        |             | 579.307436                   |                | 1734.9     | 3         |           |         |             | 1734.897842 | 34.64         | VLSAPPHHFGQTNR |           |           |                 |                 |                   |  |
| 5        | 5        |             | 579.307472                   |                | 1734.901   | 3         |           |         |             | 1734.897842 | 26.63         | VLSAPPHHFGQTNR |           |           |                 |                 |                   |  |

| Band num | prot_hit | nu_prot_acc | prot_desc                    | pep_exp_mz | pep_exp_n | pep_exp_z | quantific | average | stdev | pep_calc_mr | pep_score | pep_seq                 | light m/z | heavy m/z | light intensity | heavy intensity | ratio light/heavy |
|----------|----------|-------------|------------------------------|------------|-----------|-----------|-----------|---------|-------|-------------|-----------|-------------------------|-----------|-----------|-----------------|-----------------|-------------------|
| 5        | 6        | IPI00025491 | Eukaryotic initiation factor | 548.794016 | 1095.573  | 2         | 3         | 3.59    | 1.98  | 1095.573715 | 31.47     | QFYINVER                |           |           |                 |                 |                   |
| 5        | 6        |             |                              | 584.857104 | 1167.7    | 2         |           |         |       | 1167.699997 | 82.1      | ATQALVLAPTR             |           |           |                 |                 |                   |
| 5        | 6        |             |                              | 584.857104 | 1167.7    | 2         |           |         |       | 1167.699997 | 75.71     | ATQALVLAPTR             |           |           |                 |                 |                   |
| 5        | 6        |             |                              | 584.857104 | 1167.7    | 2         |           |         |       | 1167.699997 | 88.99     | ATQALVLAPTR             |           |           |                 |                 |                   |
| 5        | 6        |             |                              | 549.641235 | 1645.902  | 3         |           |         |       | 1645.899811 | 44.6      | LQMEAPHIIVGTPGR         |           |           |                 |                 |                   |
| 5        | 6        |             |                              | 549.641235 | 1645.902  | 3         |           |         |       | 1645.899811 | 53.84     | LQMEAPHIIVGTPGR         |           |           |                 |                 |                   |
| 5        | 6        |             |                              | 549.641235 | 1645.902  | 3         |           |         |       | 1645.899811 | 46.79     | LQMEAPHIIVGTPGR         |           |           |                 |                 |                   |
| 5        | 6        |             |                              | 828.385445 | 2482.135  | 3         |           |         |       | 2482.124924 | 21.76     | VVMALGDYMGASCHACIGGTVNR |           |           |                 |                 |                   |
| 5        | 6        | IPI00386604 | Hypothetical protein (Fragr  | 548.794016 | 1095.573  | 2         | 3         | 3.59    | 1.98  | 1095.573715 | 31.47     | QFYINVER                | 548.794   | 550.8066  | 14.3            | 5.56            | 2.57              |
| 5        | 6        |             |                              | 584.857104 | 1167.7    | 2         |           |         |       | 1167.699997 | 82.1      | ATQALVLAPTR             | 584.8571  | 586.8697  | 11.9            | 5.1             | 2.33              |
| 5        | 6        |             |                              | 584.857104 | 1167.7    | 2         |           |         |       | 1167.699997 | 75.71     | ATQALVLAPTR             |           |           |                 |                 |                   |
| 5        | 6        |             |                              | 584.857104 | 1167.7    | 2         |           |         |       | 1167.699997 | 88.99     | ATQALVLAPTR             |           |           |                 |                 |                   |
| 5        | 6        |             |                              | 549.641235 | 1645.902  | 3         |           |         |       | 1645.899811 | 44.6      | LQMEAPHIIVGTPGR         | 549.6412  | 550.9829  | 5.05            | 0.86            | 5.87              |
| 5        | 6        |             |                              | 549.641235 | 1645.902  | 3         |           |         |       | 1645.899811 | 53.84     | LQMEAPHIIVGTPGR         |           |           |                 |                 |                   |
| 5        | 6        |             |                              | 549.641235 | 1645.902  | 3         |           |         |       | 1645.899811 | 46.79     | LQMEAPHIIVGTPGR         |           |           |                 |                 |                   |
| 5        | 6        |             |                              | 828.385445 | 2482.135  | 3         |           |         |       | 2482.124924 | 21.76     | VVMALGDYMGASCHACIGGTVNR |           |           |                 |                 |                   |
| 5        | 6        | IPI00555602 | CD68 antigen variant (Frac   | 548.794016 | 1095.573  | 2         | 3         | 3.59    | 1.98  | 1095.573715 | 31.47     | QFYINVER                |           |           |                 |                 |                   |
| 5        | 6        |             |                              | 584.857104 | 1167.7    | 2         |           |         |       | 1167.699997 | 82.1      | ATQALVLAPTR             |           |           |                 |                 |                   |
| 5        | 6        |             |                              | 584.857104 | 1167.7    | 2         |           |         |       | 1167.699997 | 75.71     | ATQALVLAPTR             |           |           |                 |                 |                   |
| 5        | 6        |             |                              | 584.857104 | 1167.7    | 2         |           |         |       | 1167.699997 | 88.99     | ATQALVLAPTR             |           |           |                 |                 |                   |
| 5        | 6        |             |                              | 549.641235 | 1645.902  | 3         |           |         |       | 1645.899811 | 44.6      | LQMEAPHIIVGTPGR         |           |           |                 |                 |                   |
| 5        | 6        |             |                              | 549.641235 | 1645.902  | 3         |           |         |       | 1645.899811 | 53.84     | LQMEAPHIIVGTPGR         |           |           |                 |                 |                   |
| 5        | 6        |             |                              | 549.641235 | 1645.902  | 3         |           |         |       | 1645.899811 | 46.79     | LQMEAPHIIVGTPGR         |           |           |                 |                 |                   |
| 5        | 6        |             |                              | 828.385445 | 2482.135  | 3         |           |         |       | 2482.124924 | 21.76     | VVMALGDYMGASCHACIGGTVNR |           |           |                 |                 |                   |
| 5        | 7        | IPI00010157 | S-adenosylmethionine synt    | 736.899989 | 1471.785  | 2         | 2         | 2.35    | 0.61  | 1471.780716 | 68.56     | FVIGGPGQDAGLTGR         | 736.9001  | 738.9127  | 2.5             | 0.9             | 2.78              |
| 5        | 7        |             |                              | 736.900091 | 1471.786  | 2         |           |         |       | 1471.780716 | 81.32     | FVIGGPGQDAGLTGR         |           |           |                 |                 |                   |
| 5        | 7        |             |                              | 612.304942 | 1833.893  | 3         |           |         |       | 1833.892166 | 26.15     | YLDEDTIYHLQPSGR         |           |           |                 |                 |                   |
| 5        | 7        |             |                              | 612.304942 | 1833.893  | 3         |           |         |       | 1833.892166 | 37.49     | YLDEDTIYHLQPSGR         |           |           |                 |                 |                   |
| 5        | 7        |             |                              | 917.95567  | 1833.897  | 2         |           |         |       | 1833.892166 | 72.05     | YLDEDTIYHLQPSGR         | 917.9557  | 919.9682  | 0.98            | 0.51            | 1.92              |
| 5        | 7        |             |                              | 917.95567  | 1833.897  | 2         |           |         |       | 1833.892166 | 63.79     | YLDEDTIYHLQPSGR         |           |           |                 |                 |                   |
| 5        | 8        | IPI00301058 | Vasodilator-stimulated pho   | 435.888813 | 1304.645  | 3         | 4         | 1.26    | 0.29  | 1304.64975  | 24.17     | QQPGPSEHIER             | 435.889   | 437.2307  | 2.68            | 2.35            | 1.14              |
| 5        | 8        |             |                              | 435.889032 | 1304.645  | 3         |           |         |       | 1304.64975  | 70.2      | QQPGPSEHIER             |           |           |                 |                 |                   |
| 5        | 8        |             |                              | 470.907565 | 1409.701  | 3         |           |         |       | 1409.699722 | 43.66     | ATVMVLYDDGNKR           |           |           |                 |                 |                   |
| 5        | 8        |             |                              | 480.252247 | 1437.735  | 3         |           |         |       | 1437.731033 | 22.15     | ATVMVLYDDGNKR           |           |           |                 |                 |                   |
| 5        | 8        |             |                              | 525.607635 | 1573.801  | 3         |           |         |       | 1573.802551 | 24.32     | VQIYHNPTANSFR           | 525.6076  | 526.9483  | 8.28            | 8.94            | 0.93              |
| 5        | 8        |             |                              | 530.59258  | 1588.756  | 3         |           |         |       | 1588.755951 | 43.42     | YNQATPNFHQWR            | 530.5926  | 531.9343  | 3.44            | 2.42            | 1.42              |
| 5        | 8        |             |                              | 530.59258  | 1588.756  | 3         |           |         |       | 1588.755951 | 37.4      | YNQATPNFHQWR            |           |           |                 |                 |                   |
| 5        | 8        |             |                              | 842.383597 | 1682.753  | 2         |           |         |       | 1682.744995 | 43.19     | SGGGGLMEMNAMLAR         | 842.3836  | 844.3962  | 0.33            | 0.21            | 1.57              |
| 5        | 8        |             |                              | 899.973696 | 1797.933  | 2         |           |         |       | 1797.925385 | 56.32     | MQPDQVQVINCAIVR         |           |           |                 |                 |                   |
| 5        | 8        |             |                              | 899.973696 | 1797.933  | 2         |           |         |       | 1797.925385 | 58.55     | MQPDQVQVINCAIVR         |           |           |                 |                 |                   |
| 5        | 9        | IPI00012007 | Adenosylhomocysteinase       | 456.797974 | 911.5814  | 2         | 3         | 3.67    | 1.22  | 911.582825  | 45.92     | ILLAEGR                 | 456.798   | 458.8105  | 10.02           | 3.58            | 2.80              |
| 5        | 9        |             |                              | 595.845058 | 1189.676  | 2         |           |         |       | 1189.673065 | 56.51     | VAVVAGYGDVGK            | 595.8451  | 599.8702  | 3.8             | 0.75            | 5.07              |
| 5        | 9        |             |                              | 595.845058 | 1189.676  | 2         |           |         |       | 1189.673065 | 71.15     | VAVVAGYGDVGK            |           |           |                 |                 |                   |
| 5        | 9        |             |                              | 838.932067 | 1675.85   | 2         |           |         |       | 1675.844131 | 44.84     | GISEETTTGVHNLK          |           |           |                 |                 |                   |
| 5        | 9        |             |                              | 838.932067 | 1675.85   | 2         |           |         |       | 1675.844131 | 41.25     | GISEETTTGVHNLK          |           |           |                 |                 |                   |
| 5        | 9        |             |                              | 852.948808 | 1703.883  | 2         |           |         |       | 1703.875443 | 69.77     | GISEETTTGVHNLK          | 852.9488  | 856.9739  | 1.13            | 0.36            | 3.14              |
| 5        | 10       | IPI00171438 | Thioredoxin domain-contai    | 487.294854 | 972.5752  | 2         | 1         | 3.03    | 0.00  | 972.566833  | 27.6      | FFPGLAGVK               |           |           |                 |                 |                   |
| 5        | 10       |             |                              | 487.294854 | 972.5752  | 2         |           |         |       | 972.566833  | 29.17     | FFPGLAGVK               |           |           |                 |                 |                   |
| 5        | 10       |             |                              | 597.270926 | 1788.791  | 3         |           |         |       | 1788.790756 | 54.71     | VDCTAHSDVCSAQGVR        | 597.2713  | 598.613   | 33              | 10.9            | 3.03              |
| 5        | 10       |             |                              | 597.270926 | 1788.791  | 3         |           |         |       | 1788.790756 | 51        | VDCTAHSDVCSAQGVR        |           |           |                 |                 |                   |
| 5        | 10       |             |                              | 597.271247 | 1788.792  | 3         |           |         |       | 1788.790756 | 64.84     | VDCTAHSDVCSAQGVR        |           |           |                 |                 |                   |
| 5        | 10       |             |                              | 895.405509 | 1788.796  | 2         |           |         |       | 1788.790756 | 61.41     | VDCTAHSDVCSAQGVR        |           |           |                 |                 |                   |
| 5        | 10       |             |                              | 895.405509 | 1788.796  | 2         |           |         |       | 1788.790756 | 46.02     | VDCTAHSDVCSAQGVR        |           |           |                 |                 |                   |
| 5        | 10       | IPI00395646 | thioredoxin domain contain   | 487.294854 | 972.5752  | 2         | 1         | 3.03    | 0.00  | 972.566833  | 27.6      | FFPGLAGVK               |           |           |                 |                 |                   |
| 5        | 10       |             |                              | 487.294854 | 972.5752  | 2         |           |         |       | 972.566833  | 29.17     | FFPGLAGVK               |           |           |                 |                 |                   |
| 5        | 10       |             |                              | 597.270926 | 1788.791  | 3         |           |         |       | 1788.790756 | 54.71     | VDCTAHSDVCSAQGVR        |           |           |                 |                 |                   |
| 5        | 10       |             |                              | 597.270926 | 1788.791  | 3         |           |         |       | 1788.790756 | 51        | VDCTAHSDVCSAQGVR        |           |           |                 |                 |                   |
| 5        | 10       |             |                              | 597.271247 | 1788.792  | 3         |           |         |       | 1788.790756 | 64.84     | VDCTAHSDVCSAQGVR        |           |           |                 |                 |                   |
| 5        | 10       |             |                              | 895.405509 | 1788.796  | 2         |           |         |       | 1788.790756 | 61.41     | VDCTAHSDVCSAQGVR        |           |           |                 |                 |                   |
| 5        | 10       |             |                              | 895.405509 | 1788.796  | 2         |           |         |       | 1788.790756 | 46.02     | VDCTAHSDVCSAQGVR        |           |           |                 |                 |                   |
| 5        | 11       | IPI00171176 | Isoform 1 of Pantothenate    | 938.443449 | 1874.872  | 2         | 1         | 1.82    | 0.00  | 1874.863007 | 77.26     | ASATSVSSAGEQAAGDPEGR    | 938.4435  | 940.456   | 4.52            | 2.49            | 1.82              |
| 5        | 11       |             |                              | 938.443449 | 1874.872  | 2         |           |         |       | 1874.863007 | 73.25     | ASATSVSSAGEQAAGDPEGR    |           |           |                 |                 |                   |
| 5        | 11       |             |                              | 938.443449 | 1874.872  | 2         |           |         |       | 1874.863007 | 79.47     | ASATSVSSAGEQAAGDPEGR    |           |           |                 |                 |                   |

| Band num | prot_hit | nuprot_acc  | prot_desc                     | pep_exp_mz | pep_exp_n | pep_exp_z | quantific | average | stdev | pep_calc_mr | pep_score | pep_seq               | light m/z | heavy m/z | light intensity | heavy intensity | ratio light/heavy |      |
|----------|----------|-------------|-------------------------------|------------|-----------|-----------|-----------|---------|-------|-------------|-----------|-----------------------|-----------|-----------|-----------------|-----------------|-------------------|------|
| 5        | 11       | IPI00556350 | pantothenate kinase 2 isof    | 938.443449 | 1874.872  | 2         | 1         | 1.82    | 0.00  | 1874.863007 | 77.26     | ASATSVSSAGEQAAGDPEGR  |           |           |                 |                 |                   |      |
| 5        | 11       |             |                               | 938.443449 | 1874.872  | 2         |           |         |       | 1874.863007 | 73.25     | ASATSVSSAGEQAAGDPEGR  |           |           |                 |                 |                   |      |
| 5        | 11       |             |                               | 938.443449 | 1874.872  | 2         |           |         |       | 1874.863007 | 79.47     | ASATSVSSAGEQAAGDPEGR  |           |           |                 |                 |                   |      |
| 5        | 12       | IPI00003918 | 60S ribosomal protein L4      | 787.387588 | 2359.141  | 3         | 1         | 1.45    | 0.00  | 2359.121689 | 61.3      | QPYAVSELAGHQTSAESWGTR | 787.3876  | 788.7293  | 1.48            | 1.02            | 1.45              |      |
| 5        | 12       |             |                               | 787.387588 | 2359.141  | 3         |           |         |       | 2359.121689 | 64.38     | QPYAVSELAGHQTSAESWGTR |           |           |                 |                 |                   |      |
| 5        | 12       |             |                               | 787.387588 | 2359.141  | 3         |           |         |       | 2359.121689 | 70.71     | QPYAVSELAGHQTSAESWGTR |           |           |                 |                 |                   |      |
| 5        | 13       | IPI00025366 | Citrate synthase, mitochon    | 561.288226 | 1120.562  | 2         | 3         | 2.50    | 0.44  | 1120.561127 | 27.51     | GFSIPECQK             | 561.2882  | 565.3133  |                 | 2               | 0.7               | 2.86 |
| 5        | 13       |             |                               | 399.237863 | 1194.692  | 3         |           |         |       | 1194.689728 | 90.33     | VVPGYGHAVLR           | 399.2379  | 400.5796  | 20.4            | 10.2            | 2.00              |      |
| 5        | 13       |             |                               | 399.237863 | 1194.692  | 3         |           |         |       | 1194.689728 | 59.34     | VVPGYGHAVLR           |           |           |                 |                 |                   |      |
| 5        | 13       |             |                               | 619.381174 | 1236.748  | 2         |           |         |       | 1236.746582 | 23.26     | IVPNVLLQGGK           |           |           |                 |                 |                   |      |
| 5        | 13       |             |                               | 619.381174 | 1236.748  | 2         |           |         |       | 1236.746582 | 22.13     | IVPNVLLQGGK           |           |           |                 |                 |                   |      |
| 5        | 13       |             |                               | 633.396953 | 1264.779  | 2         |           |         |       | 1264.777893 | 28.81     | IVPNVLLQGGK           | 633.397   | 637.4221  | 5.1             | 1.94            | 2.63              |      |
| 5        | 13       |             |                               | 633.396953 | 1264.779  | 2         |           |         |       | 1264.777893 | 33.81     | IVPNVLLQGGK           |           |           |                 |                 |                   |      |
| 5        | 13       | IPI00383539 | citrate synthase precursor    | 561.288226 | 1120.562  | 2         | 3         | 2.50    | 0.44  | 1120.561127 | 27.51     | GFSIPECQK             |           |           |                 |                 |                   |      |
| 5        | 13       |             |                               | 399.237863 | 1194.692  | 3         |           |         |       | 1194.689728 | 90.33     | VVPGYGHAVLR           |           |           |                 |                 |                   |      |
| 5        | 13       |             |                               | 399.237863 | 1194.692  | 3         |           |         |       | 1194.689728 | 59.34     | VVPGYGHAVLR           |           |           |                 |                 |                   |      |
| 5        | 13       |             |                               | 619.381174 | 1236.748  | 2         |           |         |       | 1236.746582 | 23.26     | IVPNVLLQGGK           |           |           |                 |                 |                   |      |
| 5        | 13       |             |                               | 619.381174 | 1236.748  | 2         |           |         |       | 1236.746582 | 22.13     | IVPNVLLQGGK           |           |           |                 |                 |                   |      |
| 5        | 13       |             |                               | 633.396953 | 1264.779  | 2         |           |         |       | 1264.777893 | 28.81     | IVPNVLLQGGK           |           |           |                 |                 |                   |      |
| 5        | 13       |             |                               | 633.396953 | 1264.779  | 2         |           |         |       | 1264.777893 | 33.81     | IVPNVLLQGGK           |           |           |                 |                 |                   |      |
| 5        | 14       | IPI00654777 | Eukaryotic translation initia | 843.466882 | 1684.919  | 2         | 1         | 3.77    | 0.00  | 1684.913193 | 107.45    | VIGLSSDLQVGGASAR      | 843.4669  | 845.4794  | 1.96            | 0.52            | 3.77              |      |
| 5        | 14       |             |                               | 843.466882 | 1684.919  | 2         |           |         |       | 1684.913193 | 47.76     | VIGLSSDLQVGGASAR      |           |           |                 |                 |                   |      |
| 5        | 15       | IPI00299000 | Proliferation-associated pr   | 480.776518 | 959.5385  | 2         | 2         | 111.33  | 46.20 | 959.542435  | 48.98     | ALLQSSASR             | 480.7765  | 482.7891  | 21.6            | 0.15            | 144.00            |      |
| 5        | 15       |             |                               | 480.776518 | 959.5385  | 2         |           |         |       | 959.542435  | 46.51     | ALLQSSASR             |           |           |                 |                 |                   |      |
| 5        | 15       |             |                               | 480.776518 | 959.5385  | 2         |           |         |       | 959.542435  | 27.06     | ALLQSSASR             |           |           |                 |                 |                   |      |
| 5        | 15       |             |                               | 506.759493 | 1011.504  | 2         |           |         |       | 1011.504959 | 28.48     | AFFSEVER              | 506.7595  | 510.7846  | 9.44            | 0.12            | 78.67             |      |
| 5        | 15       |             |                               | 506.759493 | 1011.504  | 2         |           |         |       | 1011.504959 | 42.99     | AFFSEVER              |           |           |                 |                 |                   |      |
| 5        | 15       |             |                               | 404.218081 | 1209.632  | 3         |           |         |       | 1209.631256 | 37.16     | AAHLCAEAALR           |           |           |                 |                 |                   |      |
| 5        | 15       |             |                               | 404.218081 | 1209.632  | 3         |           |         |       | 1209.631256 | 41.45     | AAHLCAEAALR           |           |           |                 |                 |                   |      |
| 5        | 15       |             |                               | 605.824085 | 1209.634  | 2         |           |         |       | 1209.631256 | 51.65     | AAHLCAEAALR           |           |           |                 |                 |                   |      |
| 5        | 15       |             |                               | 657.358623 | 1312.703  | 2         |           |         |       | 1312.701141 | 33.46     | TIQNPTDQK             |           |           |                 |                 |                   |      |
| 5        | 16       | IPI00299571 | CDNA FLJ45525 fis, clone      | 822.444756 | 1642.875  | 2         | 1         | 2.67    | 0.00  | 1642.870255 | 70.85     | GSTAPVGGGAFPTIVER     | 822.4448  | 824.4573  | 2.19            | 0.82            | 2.67              |      |
| 5        | 16       |             |                               | 822.444756 | 1642.875  | 2         |           |         |       | 1642.870255 | 70.8      | GSTAPVGGGAFPTIVER     |           |           |                 |                 |                   |      |
| 5        | 16       | IPI00644989 | Protein disulfide-isomerase   | 822.444756 | 1642.875  | 2         | 1         | 2.67    | 0.00  | 1642.870255 | 70.85     | GSTAPVGGGAFPTIVER     |           |           |                 |                 |                   |      |
| 5        | 16       |             |                               | 822.444756 | 1642.875  | 2         |           |         |       | 1642.870255 | 70.8      | GSTAPVGGGAFPTIVER     |           |           |                 |                 |                   |      |
| 5        | 17       | IPI00441498 | Folate receptor alpha preci   | 499.807055 | 997.5996  | 2         | 2         | 1.51    | 1.01  | 997.601868  | 24.56     | VLNVPCLK              | 499.8071  | 503.8322  | 4.05            | 1.82            | 2.23              |      |
| 5        | 17       |             |                               | 820.812044 | 1639.61   | 2         |           |         |       | 1639.605606 | 52.06     | EDCEQWWEDCR           | 820.812   | 822.8246  | 0.67            | 0.84            | 0.80              |      |
| 5        | 17       |             |                               | 820.812044 | 1639.61   | 2         |           |         |       | 1639.605606 | 37.63     | EDCEQWWEDCR           |           |           |                 |                 |                   |      |
| 5        | 18       | IPI00217223 | Multifunctional protein ADE   | 711.34296  | 1420.671  | 2         | 1         | 2.00    | 0.00  | 1420.66156  | 72.63     | ACGNFGIPCELR          | 711.343   | 713.3555  | 1.22            | 0.61            | 2.00              |      |
| 5        | 18       |             |                               | 711.34296  | 1420.671  | 2         |           |         |       | 1420.66156  | 53.96     | ACGNFGIPCELR          |           |           |                 |                 |                   |      |
| 5        | 19       | IPI00303882 | Isoform B of Mannose-6-ph     | 696.374561 | 1390.735  | 2         | 2         | 2.61    | 0.01  | 1390.726242 | 73.77     | SVVTGGVQSVMGSR        | 696.3746  | 698.3871  | 1.59            | 0.61            | 2.61              |      |
| 5        | 19       |             |                               | 800.414449 | 1598.814  | 2         |           |         |       | 1598.807693 | 43.62     | LEPQIASASEYahr        | 800.4145  | 802.427   | 1.52            | 0.58            | 2.62              |      |
| 5        | 20       | IPI00305383 | Ubiquinol-cytochrome-c re     | 843.957632 | 1685.901  | 2         | 1         | 2.41    | 0.00  | 1685.897247 | 63.38     | TIAQGNLSNTDVQAAK      | 843.9576  | 847.9827  | 0.41            | 0.17            | 2.41              |      |
| 5        | 20       |             |                               | 843.957632 | 1685.901  | 2         |           |         |       | 1685.897247 | 57.82     | TIAQGNLSNTDVQAAK      |           |           |                 |                 |                   |      |
| 5        | 21       | IPI00550069 | Ribonuclease inhibitor        | 829.92559  | 1657.837  | 2         | 1         | 0.03    | 0.00  | 1657.829529 | 58.01     | ELTVSNNDINEAGVR       | 829.9256  | 831.9382  | 1.2             | 40.2            | 0.03              |      |
| 5        | 21       |             |                               | 829.92559  | 1657.837  | 2         |           |         |       | 1657.829529 | 59.98     | ELTVSNNDINEAGVR       |           |           |                 |                 |                   |      |
| 5        | 21       | IPI00783491 | Ribonuclease/angiogenin ii    | 829.92559  | 1657.837  | 2         | 1         | 0.03    | 0.00  | 1657.829529 | 58.01     | ELTVSNNDINEAGVR       |           |           |                 |                 |                   |      |
| 5        | 21       |             |                               | 829.92559  | 1657.837  | 2         |           |         |       | 1657.829529 | 59.98     | ELTVSNNDINEAGVR       |           |           |                 |                 |                   |      |
| 5        | 22       | IPI00005681 | PREDICTED: similar to ba      | 529.304842 | 1056.595  | 2         | 1         | 4.19    | 0.00  | 1056.595184 | 50.39     | DINAVAASLR            | 529.3048  | 531.3174  | 1.09            | 0.26            | 4.19              |      |
| 5        | 22       |             |                               | 529.304842 | 1056.595  | 2         |           |         |       | 1056.595184 | 63.57     | DINAVAASLR            |           |           |                 |                 |                   |      |
| 5        | 22       | IPI00180128 | basic leucine zipper and W    | 529.304842 | 1056.595  | 2         | 1         | 4.19    | 0.00  | 1056.595184 | 50.39     | DINAVAASLR            |           |           |                 |                 |                   |      |
| 5        | 22       |             |                               | 529.304842 | 1056.595  | 2         |           |         |       | 1056.595184 | 63.57     | DINAVAASLR            |           |           |                 |                 |                   |      |
| 5        | 22       | IPI00785096 | PREDICTED: similar to ba      | 529.304842 | 1056.595  | 2         | 1         | 4.19    | 0.00  | 1056.595184 | 50.39     | DINAVAASLR            |           |           |                 |                 |                   |      |
| 5        | 22       |             |                               | 529.304842 | 1056.595  | 2         |           |         |       | 1056.595184 | 63.57     | DINAVAASLR            |           |           |                 |                 |                   |      |
| 5        | 22       | IPI00787155 | PREDICTED: similar to ba      | 529.304842 | 1056.595  | 2         | 1         | 4.19    | 0.00  | 1056.595184 | 50.39     | DINAVAASLR            |           |           |                 |                 |                   |      |
| 5        | 22       |             |                               | 529.304842 | 1056.595  | 2         |           |         |       | 1056.595184 | 63.57     | DINAVAASLR            |           |           |                 |                 |                   |      |
| 5        | 23       | IPI00020632 | Argininosuccinate synthet     | 385.241196 | 768.4678  | 2         | 3         | 2.52    | 0.23  | 768.467087  | 30.99     | VIAPWR                | 385.2412  | 387.2538  | 21              | 7.71            | 2.72              |      |
| 5        | 23       |             |                               | 443.75098  | 885.4874  | 2         |           |         |       | 885.494415  | 47.47     | IDIVENR               | 443.751   | 445.7635  | 19.9            | 7.78            | 2.56              |      |
| 5        | 23       |             |                               | 443.75296  | 885.4914  | 2         |           |         |       | 885.494415  | 31.08     | IDIVENR               |           |           |                 |                 |                   |      |
| 5        | 23       |             |                               | 467.280659 | 932.5468  | 2         |           |         |       | 932.546768  | 44.56     | GQVYILGR              | 467.2807  | 469.2932  | 12.2            | 5.36            | 2.28              |      |
| 5        | 23       |             |                               | 467.280659 | 932.5468  | 2         |           |         |       | 932.546768  | 39        | GQVYILGR              |           |           |                 |                 |                   |      |
| 5        | 23       |             |                               | 496.774701 | 991.5349  | 2         |           |         |       | 991.53627   | 30.49     | VFIEDVSR              |           |           |                 |                 |                   |      |

| Band num | prot_hit_nu | prot_acc    | prot_desc                    | pep_exp_mz | pep_exp_n | pep_exp_z | quantific | average | stdev | pep_calc_mr | pep_score | pep_seq           | light m/z | heavy m/z | light intensity | heavy intensity | ratio light/heavy |
|----------|-------------|-------------|------------------------------|------------|-----------|-----------|-----------|---------|-------|-------------|-----------|-------------------|-----------|-----------|-----------------|-----------------|-------------------|
| 5        | 23          |             |                              | 496.774701 | 991.5349  | 2         |           |         |       | 991.53627   | 32.39     | VFIEDVSR          |           |           |                 |                 |                   |
| 5        | 24          | IPI00027107 | Tu translation elongation fa | 530.803306 | 1059.592  | 2         | 2         | 5.17    | 1.17  | 1059.594849 | 40.49     | GTVVVTGTLER       | 530.8033  | 532.8159  | 2.46            | 0.41            | 6.00              |
| 5        | 24          |             |                              | 607.332272 | 1212.65   | 2         |           |         |       | 1212.648651 | 55.6      | AEAGDNLGALVR      | 607.3323  | 609.3448  | 5.13            | 1.18            | 4.35              |
| 5        | 25          | IPI00027438 | Flotillin-1                  | 492.796433 | 983.5783  | 2         | 3         | 3.29    | 1.54  | 983.578796  | 20.44     | VQVQVVER          | 492.7964  | 494.809   | 3.53            | 0.7             | 5.04              |
| 5        | 25          |             |                              | 590.306884 | 1178.599  | 2         |           |         |       | 1178.595581 | 32.48     | AAVDIENVNTR       | 590.3069  | 592.3194  | 2.39            | 0.9             | 2.66              |
| 5        | 25          |             |                              | 749.407255 | 1496.8    | 2         |           |         |       | 1496.797119 | 46.31     | AQQVAVQEQEIAR     | 749.4073  | 751.4198  | 1.71            | 0.79            | 2.16              |
| 5        | 26          | IPI00550021 | 60S ribosomal protein L3     | 304.840896 | 911.5009  | 3         | 1         | 4.33    | 0.00  | 911.50354   | 40.89     | AGMTHIVR          | 304.8409  | 306.1826  | 0.39            | 0.09            | 4.33              |
| 5        | 26          |             |                              | 304.840896 | 911.5009  | 3         |           |         |       | 911.50354   | 33.27     | AGMTHIVR          |           |           |                 |                 |                   |
| 5        | 26          | IPI00651660 | ribosomal protein L3 isofo   | 304.840896 | 911.5009  | 3         | 1         | 4.33    | 0.00  | 911.50354   | 40.89     | AGMTHIVR          |           |           |                 |                 |                   |
| 5        | 26          |             |                              | 304.840896 | 911.5009  | 3         |           |         |       | 911.50354   | 33.27     | AGMTHIVR          |           |           |                 |                 |                   |
| 5        | 27          | IPI00029625 | flotillin 2                  | 471.255239 | 940.4959  | 2         | 2         | 3.08    | 1.41  | 940.500214  | 26.87     | EVAAPDVGR         | 471.2552  | 473.2678  | 1.51            | 0.37            | 4.08              |
| 5        | 27          |             |                              | 649.380832 | 1296.747  | 2         |           |         |       | 1296.742569 | 45.6      | QIAVDAQEILR       | 649.3808  | 651.3934  | 1.67            | 0.8             | 2.09              |
| 5        | 28          | IPI00027223 | Isocitrate dehydrogenase [   | 685.361033 | 1368.708  | 2         | 1         | 5.50    | 0.00  | 1368.702164 | 41.36     | TVEAAAHGTVTR      | 685.361   | 687.3736  | 0.33            | 0.06            | 5.50              |
| 5        | 29          | IPI00013122 | Hsp90 co-chaperone Cdc3      | 542.810276 | 1083.606  | 2         | 1         | 2.23    | 0.00  | 1083.606094 | 33.41     | LQAEAAQLR         | 542.8106  | 544.8232  | 1.25            | 0.56            | 2.23              |
| 5        | 29          |             |                              | 542.810606 | 1083.607  | 2         |           |         |       | 1083.606094 | 37.49     | LQAEAAQLR         |           |           |                 |                 |                   |
| 5        | 30          | IPI00220834 | ATP-dependent DNA heli       | 422.264253 | 842.514   | 2         | 1         | 24.50   | 0.00  | 842.513748  | 37.43     | EGLVIVK           | 422.2643  | 426.2894  | 7.84            | 0.32            | 24.50             |
| 5        | 31          | IPI00013847 | Ubiquinol-cytochrome-c re    | 676.333178 | 1350.652  | 2         | 1         | 2.64    | 0.00  | 1350.647369 | 30.03     | LCTSATESVAR       | 676.3332  | 678.3457  | 1.03            | 0.39            | 2.64              |
| 5        | 31          |             |                              | 676.333178 | 1350.652  | 2         |           |         |       | 1350.647369 | 29.58     | LCTSATESVAR       |           |           |                 |                 |                   |
| 5        | 32          | IPI00171897 | Sialic acid binding Ig-like  | 489.260124 | 976.5057  | 2         | 1         | 3.91    | 0.00  | 976.512375  | 35.61     | KNCSLSIR          | 489.2635  | 491.276   | 16.5            | 4.22            | 3.91              |
| 5        | 32          | IPI00394840 | sialic acid binding Ig-like  | 489.260124 | 976.5057  | 2         | 1         | 3.91    | 0.00  | 976.512375  | 35.61     | KNCSLSIR          |           |           |                 |                 |                   |
| 5        | 32          | IPI00394841 | Isoform 2 of Sialic acid-bi  | 489.260124 | 976.5057  | 2         | 1         | 3.91    | 0.00  | 976.512375  | 35.61     | KNCSLSIR          |           |           |                 |                 |                   |
| 5        | 33          | IPI00220257 | Isoform 3 of Probable tubu   | 511.306651 | 1020.599  | 2         | 1         | L       | 0.00  | 1020.596756 | 21.52     | YRKELEK           | 511.3067  | 515.3318  | 22.6            |                 | 0 L               |
| 5        | 33          |             |                              | 511.306653 | 1020.599  | 2         |           |         |       | 1020.596756 | 34.88     | YRKELEK           |           |           |                 |                 |                   |
| 5        | 33          |             |                              | 511.306653 | 1020.599  | 2         |           |         |       | 1020.596756 | 21.35     | YRKELEK           |           |           |                 |                 |                   |
| 5        | 33          | IPI00302599 | Isoform A of Probable tubu   | 511.306651 | 1020.599  | 2         | 1         | L       | 0.00  | 1020.596756 | 21.52     | YRKELEK           |           |           |                 |                 |                   |
| 5        | 33          |             |                              | 511.306653 | 1020.599  | 2         |           |         |       | 1020.596756 | 34.88     | YRKELEK           |           |           |                 |                 |                   |
| 5        | 33          |             |                              | 511.306653 | 1020.599  | 2         |           |         |       | 1020.596756 | 21.35     | YRKELEK           |           |           |                 |                 |                   |
| 5        | 33          | IPI00335572 | Isoform 4 of Probable tubu   | 511.306651 | 1020.599  | 2         | 1         | L       | 0.00  | 1020.596756 | 21.52     | YRKELEK           |           |           |                 |                 |                   |
| 5        | 33          |             |                              | 511.306653 | 1020.599  | 2         |           |         |       | 1020.596756 | 34.88     | YRKELEK           |           |           |                 |                 |                   |
| 5        | 33          |             |                              | 511.306653 | 1020.599  | 2         |           |         |       | 1020.596756 | 21.35     | YRKELEK           |           |           |                 |                 |                   |
| 5        | 34          | IPI00386119 | Isoform 5 of Splicing factor | 528.808689 | 1055.603  | 2         | 1         | 7.86    | 0.00  | 1055.599945 | 34.85     | ATGANATPLGK       | 528.8087  | 532.8338  | 19.5            | 2.48            | 7.86              |
| 5        | 35          | IPI00398795 | reticulon 3 isoform b        | 519.28     | 1036.545  | 2         | 1         | L       | 0.00  | 1036.537521 | 34.24     | YPMSALLSR         |           |           |                 |                 |                   |
| 5        | 35          | IPI00743293 | RTN3-A1                      | 519.28     | 1036.545  | 2         | 1         | L       | 0.00  | 1036.537521 | 34.24     | YPMSALLSR         |           |           |                 |                 |                   |
| 5        | 36          | IPI00438855 | Isoform 1 of Interleukin-12  | 528.808689 | 1055.603  | 2         | 1         | L       | 0.00  | 1055.59993  | 32.82     | DEGLVLLNR         | 528.8087  | 530.8212  | 19.5            |                 | 0 L               |
| 5        | 36          |             |                              | 528.808689 | 1055.603  | 2         |           |         |       | 1055.59993  | 21.55     | DEGLVLLNR         |           |           |                 |                 |                   |
| 5        | 36          |             |                              | 528.808689 | 1055.603  | 2         |           |         |       | 1055.59993  | 25.45     | DEGLVLLNR         |           |           |                 |                 |                   |
| 5        | 36          | IPI00438856 | Isoform 2 of Interleukin-12  | 528.808689 | 1055.603  | 2         |           |         |       | 1055.59993  | 32.82     | DEGLVLLNR         |           | 2.012555  |                 |                 |                   |
| 5        | 36          |             |                              | 528.808689 | 1055.603  | 2         |           |         |       | 1055.59993  | 21.55     | DEGLVLLNR         |           |           |                 |                 |                   |
| 5        | 36          |             |                              | 528.808689 | 1055.603  | 2         |           |         |       | 1055.59993  | 25.45     | DEGLVLLNR         |           |           |                 |                 |                   |
| 5        | 36          | IPI00479253 | Interleukin 12 receptor, bet | 528.808689 | 1055.603  | 2         |           |         |       | 1055.59993  | 32.82     | DEGLVLLNR         |           |           |                 |                 |                   |
| 5        | 36          |             |                              | 528.808689 | 1055.603  | 2         |           |         |       | 1055.59993  | 21.55     | DEGLVLLNR         |           |           |                 |                 |                   |
| 5        | 36          |             |                              | 528.808689 | 1055.603  | 2         |           |         |       | 1055.59993  | 25.45     | DEGLVLLNR         |           |           |                 |                 |                   |
| 5        | 37          | IPI00032316 | Zinc finger protein 95 hom   | 509.287328 | 1016.56   | 2         | 1         | 8.66    | 0.00  | 1016.560059 | 32.68     | DNMELIVK          | 509.2873  | 513.3124  | 49.3            | 5.69            | 8.66              |
| 5        | 38          | IPI00008522 | Sodium channel protein tyf   | 430.274883 | 858.5352  | 2         |           |         |       | 858.528656  | 30.92     | KGSLSVLR          |           |           |                 |                 |                   |
| 5        | 38          | IPI00783779 | 221 kDa protein              | 430.274883 | 858.5352  | 2         |           |         |       | 858.528656  | 30.92     | KGSLSVLR          |           |           |                 |                 |                   |
| 5        | 39          | IPI00030450 | PREDICTED: similar to pe     | 499.804335 | 997.5941  | 2         | 1         | L       | 0.00  | 997.59201   | 30.41     | KVSSTPPVR         | 499.8043  | 501.8169  |                 |                 |                   |
| 5        | 39          | IPI00738957 | PREDICTED: similar to pe     | 499.804335 | 997.5941  | 2         | 1         | L       | 0.00  | 997.59201   | 30.41     | KVSSTPPVR         |           |           |                 |                 |                   |
| 5        | 39          | IPI00743749 | Hypothetical protein FLJ22   | 499.804335 | 997.5941  | 2         | 1         | L       | 0.00  | 997.59201   | 30.41     | KVSSTPPVR         |           |           |                 |                 |                   |
| 5        | 39          | IPI00760876 | 87 kDa protein               | 499.804335 | 997.5941  | 2         | 1         | L       | 0.00  | 997.59201   | 30.41     | KVSSTPPVR         |           |           |                 |                 |                   |
| 5        | 39          | IPI00787937 | PREDICTED: similar to pe     | 499.804335 | 997.5941  | 2         | 1         | L       | 0.00  | 997.59201   | 30.41     | KVSSTPPVR         |           |           |                 |                 |                   |
| 5        | 40          | IPI00002142 | Protocadherin-10 precursor   | 543.277212 | 1084.54   | 2         | 1         | 0.23    | 0.00  | 1084.546524 | 29.87     | SFDYEQLK          | 543.2772  | 547.3023  | 2.43            | 10.6            | 0.23              |
| 5        | 40          | IPI00010826 | protocadherin 10 isoform 2   | 543.277212 | 1084.54   | 2         | 1         | 0.23    | 0.00  | 1084.546524 | 29.87     | SFDYEQLK          |           |           |                 |                 |                   |
| 5        | 41          | IPI00011062 | Isoform 1 of Carbamoyl-ph    | 555.958473 | 1664.854  | 3         | 1         | 4.07    | 0.00  | 1664.858887 | 29.13     | IGSSMKSIVGEVMAIGR | 555.9585  | 557.3002  | 2.93            | 0.72            | 4.07              |
| 5        | 41          | IPI00397498 | Isoform 2 of Carbamoyl-ph    | 555.958473 | 1664.854  | 3         | 1         | 4.07    | 0.00  | 1664.858887 | 29.13     | IGSSMKSIVGEVMAIGR |           |           |                 |                 |                   |
| 6        | 1           | IPI00219219 | Galectin-1                   | 505.578049 | 1513.712  | 3         | 2         | 4.20    | 1.25  | 1513.712036 | 43.43     | DSNNLCLHFNPR      |           |           |                 |                 |                   |
| 6        | 1           |             |                              | 505.578049 | 1513.712  | 3         |           |         |       | 1513.712036 | 39.77     | DSNNLCLHFNPR      |           |           |                 |                 |                   |
| 6        | 1           |             |                              | 505.578049 | 1513.712  | 3         |           |         |       | 1513.712036 | 36.3      | DSNNLCLHFNPR      |           |           |                 |                 |                   |
| 6        | 1           |             |                              | 757.866811 | 1513.719  | 2         |           |         |       | 1513.712036 | 41.09     | DSNNLCLHFNPR      | 757.8668  | 759.8794  | 5.1             | 1.54            | 3.31              |
| 6        | 1           |             |                              | 757.866811 | 1513.719  | 2         |           |         |       | 1513.712036 | 48.39     | DSNNLCLHFNPR      |           |           |                 |                 |                   |
| 6        | 1           |             |                              | 559.268387 | 1674.783  | 3         |           |         |       | 1674.780823 | 46.72     | FNAHGDANTIVCNSK   |           |           |                 |                 |                   |
| 6        | 1           |             |                              | 838.40154  | 1674.789  | 2         |           |         |       | 1674.780823 | 76.55     | FNAHGDANTIVCNSK   | 838.4015  | 840.4141  | 8.89            | 1.75            | 5.08              |
| 6        | 1           |             |                              | 838.40154  | 1674.789  | 2         |           |         |       | 1674.780823 | 99.51     | FNAHGDANTIVCNSK   |           |           |                 |                 |                   |
| 6        | 1           |             |                              | 838.40154  | 1674.789  | 2         |           |         |       | 1674.780823 | 58.5      | FNAHGDANTIVCNSK   |           |           |                 |                 |                   |

| Band num | prot_hit | nu          | prot_acc | prot_desc                  | pep_exp_mz | pep_exp_n | pep_exp_z | quantific | average | stdev | pep_calc_mr | pep_score | pep_seq         | light m/z | heavy m/z | light intensity | heavy intensity | ratio light/heavy |
|----------|----------|-------------|----------|----------------------------|------------|-----------|-----------|-----------|---------|-------|-------------|-----------|-----------------|-----------|-----------|-----------------|-----------------|-------------------|
| 6        | 1        |             |          |                            | 568.612079 | 1702.814  | 3         |           |         |       | 1702.812134 | 53.05     | FNAHGDANTIVCNSK |           |           |                 |                 |                   |
| 6        | 1        |             |          |                            | 568.612079 | 1702.814  | 3         |           |         |       | 1702.812134 | 46.62     | FNAHGDANTIVCNSK |           |           |                 |                 |                   |
| 6        | 1        |             |          |                            | 568.612079 | 1702.814  | 3         |           |         |       | 1702.812134 | 52.36     | FNAHGDANTIVCNSK |           |           |                 |                 |                   |
| 6        | 1        |             |          |                            | 852.416526 | 1702.819  | 2         |           |         |       | 1702.812134 | 77.66     | FNAHGDANTIVCNSK |           |           |                 |                 |                   |
| 6        | 1        |             |          |                            | 852.416526 | 1702.819  | 2         |           |         |       | 1702.812134 | 75.83     | FNAHGDANTIVCNSK |           |           |                 |                 |                   |
| 6        | 1        |             |          |                            | 852.416526 | 1702.819  | 2         |           |         |       | 1702.812134 | 48.67     | FNAHGDANTIVCNSK |           |           |                 |                 |                   |
| 6        | 2        | IPI00221232 |          | Guanine nucleotide-binding | 423.240855 | 844.4672  | 2         | 3         | 3.55    | 1.21  | 844.467865  | 20.3      | LEASIER         | 423.2409  | 425.2534  | 5.18            | 1.62            | 3.20              |
| 6        | 2        |             |          |                            | 556.577391 | 1666.71   | 3         |           |         |       | 1666.710373 | 54.99     | ASADLMSYCEEHAR  | 556.5774  | 557.9191  | 11.3            | 2.31            | 4.89              |
| 6        | 2        |             |          |                            | 556.577391 | 1666.71   | 3         |           |         |       | 1666.710373 | 55.76     | ASADLMSYCEEHAR  |           |           |                 |                 |                   |
| 6        | 2        |             |          |                            | 556.577391 | 1666.71   | 3         |           |         |       | 1666.710373 | 68.74     | ASADLMSYCEEHAR  |           |           |                 |                 |                   |
| 6        | 2        |             |          |                            | 834.365295 | 1666.716  | 2         |           |         |       | 1666.710373 | 68.74     | ASADLMSYCEEHAR  | 834.3625  | 836.375   | 1.92            | 0.75            | 2.56              |
| 6        | 2        |             |          |                            | 834.365295 | 1666.716  | 2         |           |         |       | 1666.710373 | 74.68     | ASADLMSYCEEHAR  |           |           |                 |                 |                   |
| 6        | 2        |             |          |                            | 834.365295 | 1666.716  | 2         |           |         |       | 1666.710373 | 76.62     | ASADLMSYCEEHAR  |           |           |                 |                 |                   |
| 6        | 2        |             |          |                            | 834.365295 | 1666.716  | 2         |           |         |       | 1666.710373 | 93.78     | ASADLMSYCEEHAR  |           |           |                 |                 |                   |
| 6        | 2        |             |          |                            | 834.365295 | 1666.716  | 2         |           |         |       | 1666.710373 | 70.79     | ASADLMSYCEEHAR  |           |           |                 |                 |                   |
| 6        | 2        |             |          |                            | 834.365295 | 1666.716  | 2         |           |         |       | 1666.710373 | 52.06     | ASADLMSYCEEHAR  |           |           |                 |                 |                   |
| 6        | 2        |             |          |                            | 842.363641 | 1682.713  | 2         |           |         |       | 1682.705292 | 39.62     | ASADLMSYCEEHAR  |           |           |                 |                 |                   |
| 6        | 3        | IPI00216691 |          | Profilin-1                 | 360.546026 | 1078.616  | 3         | 3         | 3.10    | 0.80  | 1078.615906 | 38.49     | EGVHGGGLINK     | 360.546   | 363.2294  | 1.9             | 0.71            | 2.68              |
| 6        | 3        |             |          |                            | 360.546026 | 1078.616  | 3         |           |         |       | 1078.615906 | 37.21     | EGVHGGGLINK     |           |           |                 |                 |                   |
| 6        | 3        |             |          |                            | 360.546026 | 1078.616  | 3         |           |         |       | 1078.615906 | 36.63     | EGVHGGGLINK     |           |           |                 |                 |                   |
| 6        | 3        |             |          |                            | 597.774936 | 1193.535  | 2         |           |         |       | 1193.534592 | 24.32     | CYEMASHLR       | 597.7755  | 599.7881  | 0.81            | 0.31            | 2.61              |
| 6        | 3        |             |          |                            | 398.852419 | 1193.535  | 3         |           |         |       | 1193.534592 | 38.01     | CYEMASHLR       |           |           |                 |                 |                   |
| 6        | 3        |             |          |                            | 398.852419 | 1193.535  | 3         |           |         |       | 1193.534592 | 38.17     | CYEMASHLR       |           |           |                 |                 |                   |
| 6        | 3        |             |          |                            | 597.775534 | 1193.537  | 2         |           |         |       | 1193.534592 | 50.26     | CYEMASHLR       |           |           |                 |                 |                   |
| 6        | 3        |             |          |                            | 704.384057 | 1406.754  | 2         |           |         |       | 1406.742966 | 65.58     | STGGAPTFNVTVTK  |           |           |                 |                 |                   |
| 6        | 3        |             |          |                            | 704.384057 | 1406.754  | 2         |           |         |       | 1406.742966 | 85.11     | STGGAPTFNVTVTK  |           |           |                 |                 |                   |
| 6        | 3        |             |          |                            | 718.396511 | 1434.778  | 2         |           |         |       | 1434.774277 | 78.2      | STGGAPTFNVTVTK  | 718.3966  | 722.4217  | 7.48            | 1.86            | 4.02              |
| 6        | 3        |             |          |                            | 718.396631 | 1434.779  | 2         |           |         |       | 1434.774277 | 86.85     | STGGAPTFNVTVTK  |           |           |                 |                 |                   |
| 6        | 3        |             |          |                            | 718.396631 | 1434.779  | 2         |           |         |       | 1434.774277 | 62.79     | STGGAPTFNVTVTK  |           |           |                 |                 |                   |
| 6        | 4        | IPI00011302 |          | CD59 glycoprotein precurs  | 460.764709 | 919.5149  | 2         | 3         | 3.03    | 0.34  | 919.515137  | 27.31     | AGLQVYNK        |           |           |                 |                 |                   |
| 6        | 4        |             |          |                            | 474.780814 | 947.5471  | 2         |           |         |       | 947.546448  | 45.45     | AGLQVYNK        | 474.7808  | 478.8059  | 7.02            | 2.64            | 2.66              |
| 6        | 4        |             |          |                            | 474.780815 | 947.5471  | 2         |           |         |       | 947.546448  | 50.01     | AGLQVYNK        |           |           |                 |                 |                   |
| 6        | 4        |             |          |                            | 523.237097 | 1566.689  | 3         |           |         |       | 1566.690964 | 39.63     | FEHCNFDVTTTR    |           |           |                 |                 |                   |
| 6        | 4        |             |          |                            | 523.237097 | 1566.689  | 3         |           |         |       | 1566.690964 | 35.15     | FEHCNFDVTTTR    |           |           |                 |                 |                   |
| 6        | 4        |             |          |                            | 523.237103 | 1566.689  | 3         |           |         |       | 1566.690964 | 40.65     | FEHCNFDVTTTR    |           |           |                 |                 |                   |
| 6        | 4        |             |          |                            | 784.354969 | 1566.695  | 2         |           |         |       | 1566.690964 | 51.65     | FEHCNFDVTTTR    | 784.355   | 786.3675  | 9.28            | 2.79            | 3.33              |
| 6        | 4        |             |          |                            | 784.354969 | 1566.695  | 2         |           |         |       | 1566.690964 | 62.74     | FEHCNFDVTTTR    |           |           |                 |                 |                   |
| 6        | 4        |             |          |                            | 784.354969 | 1566.695  | 2         |           |         |       | 1566.690964 | 60.08     | FEHCNFDVTTTR    |           |           |                 |                 |                   |
| 6        | 4        |             |          |                            | 838.897156 | 1675.78   | 2         |           |         |       | 1675.772247 | 35.87     | LRENELTYYCCK    |           |           |                 |                 |                   |
| 6        | 4        |             |          |                            | 838.897156 | 1675.78   | 2         |           |         |       | 1675.772247 | 25.72     | LRENELTYYCCK    |           |           |                 |                 |                   |
| 6        | 4        |             |          |                            | 568.943043 | 1703.807  | 3         |           |         |       | 1703.803558 | 34.66     | LRENELTYYCCK    |           |           |                 |                 |                   |
| 6        | 4        |             |          |                            | 568.943043 | 1703.807  | 3         |           |         |       | 1703.803558 | 36.63     | LRENELTYYCCK    |           |           |                 |                 |                   |
| 6        | 4        |             |          |                            | 568.943043 | 1703.807  | 3         |           |         |       | 1703.803558 | 25.55     | LRENELTYYCCK    |           |           |                 |                 |                   |
| 6        | 4        |             |          |                            | 852.911598 | 1703.809  | 2         |           |         |       | 1703.803558 | 54.43     | LRENELTYYCCK    | 852.9116  | 856.9367  | 1.24            | 0.4             | 3.10              |
| 6        | 4        |             |          |                            | 852.911598 | 1703.809  | 2         |           |         |       | 1703.803558 | 45.2      | LRENELTYYCCK    |           |           |                 |                 |                   |
| 6        | 4        |             |          |                            | 852.911598 | 1703.809  | 2         |           |         |       | 1703.803558 | 48.41     | LRENELTYYCCK    |           |           |                 |                 |                   |
| 6        | 5        | IPI00220362 |          | 10 kDa heat shock protein, | 535.317909 | 1068.621  | 2         | 3         | 3.64    | 1.10  | 1068.620331 | 39.27     | GGEIQPVSVK      | 535.3179  | 539.343   | 1.49            | 0.43            | 3.47              |
| 6        | 5        |             |          |                            | 552.819008 | 1103.623  | 2         |           |         |       | 1103.625076 | 25.03     | VLLPEYGGTK      |           |           |                 |                 |                   |
| 6        | 5        |             |          |                            | 566.834668 | 1131.655  | 2         |           |         |       | 1131.656387 | 36.85     | VLLPEYGGTK      | 566.8347  | 570.8598  | 11.4            | 2.37            | 4.81              |
| 6        | 5        |             |          |                            | 566.834668 | 1131.655  | 2         |           |         |       | 1131.656387 | 35.96     | VLLPEYGGTK      |           |           |                 |                 |                   |
| 6        | 5        |             |          |                            | 672.402737 | 1342.791  | 2         |           |         |       | 1342.784409 | 72.45     | VLQATVVAVGSGSK  |           |           |                 |                 |                   |
| 6        | 5        |             |          |                            | 672.402737 | 1342.791  | 2         |           |         |       | 1342.784409 | 72.6      | VLQATVVAVGSGSK  |           |           |                 |                 |                   |
| 6        | 5        |             |          |                            | 686.417012 | 1370.819  | 2         |           |         |       | 1370.81572  | 95.99     | VLQATVVAVGSGSK  | 686.417   | 690.4421  | 1.29            | 0.49            | 2.63              |
| 6        | 5        |             |          |                            | 686.417012 | 1370.819  | 2         |           |         |       | 1370.81572  | 88.77     | VLQATVVAVGSGSK  |           |           |                 |                 |                   |
| 6        | 6        | IPI00000874 |          | Peroxiredoxin-1            | 424.230256 | 846.446   | 2         | 3         | 3.44    | 0.52  | 846.447144  | 22.96     | SVDETLR         | 424.2303  | 426.2428  | 0.95            | 0.33            | 2.88              |
| 6        | 6        |             |          |                            | 461.735469 | 921.4564  | 2         |           |         |       | 921.458023  | 42.59     | ADEGISFR        | 461.7355  | 463.748   | 11.8            | 3.34            | 3.53              |
| 6        | 6        |             |          |                            | 461.735469 | 921.4564  | 2         |           |         |       | 921.458023  | 40.22     | ADEGISFR        |           |           |                 |                 |                   |
| 6        | 6        |             |          |                            | 498.766706 | 995.5189  | 2         |           |         |       | 995.519989  | 24.77     | DISLSDYK        | 498.7667  | 502.7918  | 6.12            | 1.57            | 3.90              |
| 6        | 6        |             |          |                            | 346.203767 | 1035.589  | 3         |           |         |       | 1035.588989 | 25.24     | IGHPAPNFK       |           |           |                 |                 |                   |
| 6        | 6        |             |          |                            | 346.203767 | 1035.589  | 3         |           |         |       | 1035.588989 | 21.66     | IGHPAPNFK       |           |           |                 |                 |                   |
| 6        | 6        |             |          |                            | 568.323413 | 1134.632  | 2         |           |         |       | 1134.630905 | 66.25     | TIAQDYGVLK      |           |           |                 |                 |                   |
| 6        | 6        |             |          |                            | 568.323413 | 1134.632  | 2         |           |         |       | 1134.630905 | 46.99     | TIAQDYGVLK      |           |           |                 |                 |                   |
| 6        | 6        |             |          |                            | 582.338852 | 1162.663  | 2         |           |         |       | 1162.662216 | 59.12     | TIAQDYGVLK      |           |           |                 |                 |                   |

| Band num | prot_hit | nu prot_acc | prot_desc                  | pep_exp_mz | pep_exp_n | pep_exp_z | quantific | average | stdev | pep_calc_mr | pep_score | pep_seq           | light m/z | heavy m/z | light intensity | heavy intensity | ratio light/heavy |
|----------|----------|-------------|----------------------------|------------|-----------|-----------|-----------|---------|-------|-------------|-----------|-------------------|-----------|-----------|-----------------|-----------------|-------------------|
| 6        | 6        |             |                            | 582.338852 | 1162.663  | 2         |           |         |       | 1162.662216 | 62.4      | TIAQDYGVLK        |           |           |                 |                 |                   |
| 6        | 6        |             |                            | 582.338852 | 1162.663  | 2         |           |         |       | 1162.662216 | 57.01     | TIAQDYGVLK        |           |           |                 |                 |                   |
| 6        | 6        |             |                            | 596.807874 | 1191.601  | 2         |           |         |       | 1191.598221 | 36.07     | ATAVMPDGQFK       |           |           |                 |                 |                   |
| 6        | 6        |             |                            | 596.807874 | 1191.601  | 2         |           |         |       | 1191.598221 | 42.01     | ATAVMPDGQFK       |           |           |                 |                 |                   |
| 6        | 6        |             |                            | 604.804739 | 1207.595  | 2         |           |         |       | 1207.59314  | 44.82     | ATAVMPDGQFK       |           |           |                 |                 |                   |
| 6        | 6        |             |                            | 610.822734 | 1219.631  | 2         |           |         |       | 1219.629532 | 35.47     | ATAVMPDGQFK       |           |           |                 |                 |                   |
| 6        | 6        |             |                            | 610.822734 | 1219.631  | 2         |           |         |       | 1219.629532 | 36.73     | ATAVMPDGQFK       |           |           |                 |                 |                   |
| 6        | 6        |             |                            | 618.819555 | 1235.625  | 2         |           |         |       | 1235.624451 | 29.28     | ATAVMPDGQFK       |           |           |                 |                 |                   |
| 6        | 6        | IPI00640741 | 19 kDa protein             | 424.230256 | 846.446   | 2         | 3         | 3.44    | 0.52  | 846.447144  | 22.96     | SVDETLR           |           |           |                 |                 |                   |
| 6        | 6        |             |                            | 461.735469 | 921.4564  | 2         |           |         |       | 921.458023  | 42.59     | ADEGISFR          |           |           |                 |                 |                   |
| 6        | 6        |             |                            | 461.735469 | 921.4564  | 2         |           |         |       | 921.458023  | 40.22     | ADEGISFR          |           |           |                 |                 |                   |
| 6        | 6        |             |                            | 498.766706 | 995.5189  | 2         |           |         |       | 995.519989  | 24.77     | DISLSDYK          |           |           |                 |                 |                   |
| 6        | 6        |             |                            | 346.203767 | 1035.589  | 3         |           |         |       | 1035.588989 | 25.24     | IGHPAPNFK         |           |           |                 |                 |                   |
| 6        | 6        |             |                            | 346.203767 | 1035.589  | 3         |           |         |       | 1035.588989 | 21.66     | IGHPAPNFK         |           |           |                 |                 |                   |
| 6        | 6        |             |                            | 568.323413 | 1134.632  | 2         |           |         |       | 1134.630905 | 66.25     | TIAQDYGVLK        |           |           |                 |                 |                   |
| 6        | 6        |             |                            | 568.323413 | 1134.632  | 2         |           |         |       | 1134.630905 | 46.99     | TIAQDYGVLK        |           |           |                 |                 |                   |
| 6        | 6        |             |                            | 582.338852 | 1162.663  | 2         |           |         |       | 1162.662216 | 59.12     | TIAQDYGVLK        |           |           |                 |                 |                   |
| 6        | 6        |             |                            | 582.338852 | 1162.663  | 2         |           |         |       | 1162.662216 | 62.4      | TIAQDYGVLK        |           |           |                 |                 |                   |
| 6        | 6        |             |                            | 582.338852 | 1162.663  | 2         |           |         |       | 1162.662216 | 57.01     | TIAQDYGVLK        |           |           |                 |                 |                   |
| 6        | 6        |             |                            | 596.807874 | 1191.601  | 2         |           |         |       | 1191.598221 | 36.07     | ATAVMPDGQFK       |           |           |                 |                 |                   |
| 6        | 6        |             |                            | 596.807874 | 1191.601  | 2         |           |         |       | 1191.598221 | 42.01     | ATAVMPDGQFK       |           |           |                 |                 |                   |
| 6        | 6        |             |                            | 604.804739 | 1207.595  | 2         |           |         |       | 1207.59314  | 44.82     | ATAVMPDGQFK       |           |           |                 |                 |                   |
| 6        | 6        |             |                            | 610.822734 | 1219.631  | 2         |           |         |       | 1219.629532 | 35.47     | ATAVMPDGQFK       |           |           |                 |                 |                   |
| 6        | 6        |             |                            | 610.822734 | 1219.631  | 2         |           |         |       | 1219.629532 | 36.73     | ATAVMPDGQFK       |           |           |                 |                 |                   |
| 6        | 6        |             |                            | 618.819555 | 1235.625  | 2         |           |         |       | 1235.624451 | 29.28     | ATAVMPDGQFK       |           |           |                 |                 |                   |
| 6        | 7        | IPI00024933 | 60S ribosomal protein L12  | 852.426872 | 1702.839  | 2         | 1         | 4.39    | 0.00  | 1702.833237 | 102.19    | EILGTAQSVGCNVDGR  | 852.4269  | 854.4394  | 4.21            | 0.96            | 4.39              |
| 6        | 7        |             |                            | 852.426872 | 1702.839  | 2         |           |         |       | 1702.833237 | 95.12     | EILGTAQSVGCNVDGR  |           |           |                 |                 |                   |
| 6        | 7        |             |                            | 852.426872 | 1702.839  | 2         |           |         |       | 1702.833237 | 101.48    | EILGTAQSVGCNVDGR  |           |           |                 |                 |                   |
| 6        | 7        | IPI00026621 | 18 kDa protein             | 852.426872 | 1702.839  | 2         | 1         | 4.39    | 0.00  | 1702.833237 | 102.19    | EILGTAQSVGCNVDGR  |           |           |                 |                 |                   |
| 6        | 7        |             |                            | 852.426872 | 1702.839  | 2         |           |         |       | 1702.833237 | 95.12     | EILGTAQSVGCNVDGR  |           |           |                 |                 |                   |
| 6        | 7        |             |                            | 852.426872 | 1702.839  | 2         |           |         |       | 1702.833237 | 101.48    | EILGTAQSVGCNVDGR  |           |           |                 |                 |                   |
| 6        | 7        | IPI00455040 | RPL12 protein              | 852.426872 | 1702.839  | 2         | 1         | 4.39    | 0.00  | 1702.833237 | 102.19    | EILGTAQSVGCNVDGR  |           |           |                 |                 |                   |
| 6        | 7        |             |                            | 852.426872 | 1702.839  | 2         |           |         |       | 1702.833237 | 95.12     | EILGTAQSVGCNVDGR  |           |           |                 |                 |                   |
| 6        | 7        |             |                            | 852.426872 | 1702.839  | 2         |           |         |       | 1702.833237 | 101.48    | EILGTAQSVGCNVDGR  |           |           |                 |                 |                   |
| 6        | 7        | IPI00477279 | PREDICTED: similar to 60S  | 852.426872 | 1702.839  | 2         | 1         | 4.39    | 0.00  | 1702.833237 | 102.19    | EILGTAQSVGCNVDGR  |           |           |                 |                 |                   |
| 6        | 7        |             |                            | 852.426872 | 1702.839  | 2         |           |         |       | 1702.833237 | 95.12     | EILGTAQSVGCNVDGR  |           |           |                 |                 |                   |
| 6        | 7        |             |                            | 852.426872 | 1702.839  | 2         |           |         |       | 1702.833237 | 101.48    | EILGTAQSVGCNVDGR  |           |           |                 |                 |                   |
| 6        | 7        | IPI00478310 | PREDICTED: similar to 60S  | 852.426872 | 1702.839  | 2         | 1         | 4.39    | 0.00  | 1702.833237 | 102.19    | EILGTAQSVGCNVDGR  |           |           |                 |                 |                   |
| 6        | 7        |             |                            | 852.426872 | 1702.839  | 2         |           |         |       | 1702.833237 | 95.12     | EILGTAQSVGCNVDGR  |           |           |                 |                 |                   |
| 6        | 7        |             |                            | 852.426872 | 1702.839  | 2         |           |         |       | 1702.833237 | 101.48    | EILGTAQSVGCNVDGR  |           |           |                 |                 |                   |
| 6        | 7        | IPI00479158 | Ribosomal protein L12 vari | 852.426872 | 1702.839  | 2         | 1         | 4.39    | 0.00  | 1702.833237 | 102.19    | EILGTAQSVGCNVDGR  |           |           |                 |                 |                   |
| 6        | 7        |             |                            | 852.426872 | 1702.839  | 2         |           |         |       | 1702.833237 | 95.12     | EILGTAQSVGCNVDGR  |           |           |                 |                 |                   |
| 6        | 7        |             |                            | 852.426872 | 1702.839  | 2         |           |         |       | 1702.833237 | 101.48    | EILGTAQSVGCNVDGR  |           |           |                 |                 |                   |
| 6        | 7        | IPI00746242 | 14 kDa protein             | 852.426872 | 1702.839  | 2         | 1         | 4.39    | 0.00  | 1702.833237 | 102.19    | EILGTAQSVGCNVDGR  |           |           |                 |                 |                   |
| 6        | 7        |             |                            | 852.426872 | 1702.839  | 2         |           |         |       | 1702.833237 | 95.12     | EILGTAQSVGCNVDGR  |           |           |                 |                 |                   |
| 6        | 7        |             |                            | 852.426872 | 1702.839  | 2         |           |         |       | 1702.833237 | 101.48    | EILGTAQSVGCNVDGR  |           |           |                 |                 |                   |
| 6        | 8        | IPI00216298 | Thioredoxin                | 468.744132 | 935.4737  | 2         | 2         | 1.36    | 0.15  | 935.473648  | 25.49     | VGEFSGANK         |           |           |                 |                 |                   |
| 6        | 8        |             |                            | 482.759342 | 963.5041  | 2         |           |         |       | 963.504959  | 33.6      | VGEFSGANK         | 482.7594  | 486.7845  | 12.5            | 8.53            | 1.47              |
| 6        | 8        |             |                            | 482.759388 | 963.5042  | 2         |           |         |       | 963.504959  | 40.41     | VGEFSGANK         |           |           |                 |                 |                   |
| 6        | 8        |             |                            | 482.759388 | 963.5042  | 2         |           |         |       | 963.504959  | 43.02     | VGEFSGANK         |           |           |                 |                 |                   |
| 6        | 8        |             |                            | 682.84191  | 1363.669  | 2         |           |         |       | 1363.664383 | 77.4      | TAFQEALDAAGDK     |           |           |                 |                 |                   |
| 6        | 8        |             |                            | 682.84191  | 1363.669  | 2         |           |         |       | 1363.664383 | 87.81     | TAFQEALDAAGDK     | 682.8419  | 684.8545  | 78.9            | 62.9            | 1.25              |
| 6        | 8        |             |                            | 682.84191  | 1363.669  | 2         |           |         |       | 1363.664383 | 88.87     | TAFQEALDAAGDK     |           |           |                 |                 |                   |
| 6        | 8        | IPI00552768 | Thioredoxin                | 468.744132 | 935.4737  | 2         | 2         | 1.36    | 0.15  | 935.473648  | 25.49     | VGEFSGANK         |           |           |                 |                 |                   |
| 6        | 8        |             |                            | 482.759342 | 963.5041  | 2         |           |         |       | 963.504959  | 33.6      | VGEFSGANK         |           |           |                 |                 |                   |
| 6        | 8        |             |                            | 482.759388 | 963.5042  | 2         |           |         |       | 963.504959  | 40.41     | VGEFSGANK         |           |           |                 |                 |                   |
| 6        | 8        |             |                            | 482.759388 | 963.5042  | 2         |           |         |       | 963.504959  | 43.02     | VGEFSGANK         |           |           |                 |                 |                   |
| 6        | 8        |             |                            | 682.84191  | 1363.669  | 2         |           |         |       | 1363.664383 | 77.4      | TAFQEALDAAGDK     |           |           |                 |                 |                   |
| 6        | 8        |             |                            | 682.84191  | 1363.669  | 2         |           |         |       | 1363.664383 | 87.81     | TAFQEALDAAGDK     |           |           |                 |                 |                   |
| 6        | 8        |             |                            | 682.84191  | 1363.669  | 2         |           |         |       | 1363.664383 | 88.87     | TAFQEALDAAGDK     |           |           |                 |                 |                   |
| 6        | 9        | IPI00024915 | Isoform Mitochondrial of P | 967.99924  | 1933.984  | 2         | 1         | 2.58    | 0.00  | 1934.00209  | 113.57    | ETDLLLDDSLVSIFGNR | 967.9992  | 970.0118  | 0.67            | 0.26            | 2.58              |
| 6        | 9        |             |                            | 967.99924  | 1933.984  | 2         |           |         |       | 1934.00209  | 79.95     | ETDLLLDDSLVSIFGNR |           |           |                 |                 |                   |
| 6        | 9        |             |                            | 967.99924  | 1933.984  | 2         |           |         |       | 1934.00209  | 63.86     | ETDLLLDDSLVSIFGNR |           |           |                 |                 |                   |



| Band num | prot_hit | nu prot_acc | prot_desc                   | pep_exp_mz | pep_exp_n | pep_exp_z | quantific | average | stdev | pep_calc_mr | pep_score | pep_seq           | light m/z | heavy m/z | light intensity | heavy intensity | ratio light/heavy |
|----------|----------|-------------|-----------------------------|------------|-----------|-----------|-----------|---------|-------|-------------|-----------|-------------------|-----------|-----------|-----------------|-----------------|-------------------|
| 6        | 9        |             |                             | 967.99924  | 1933.984  | 2         |           |         |       | 1934.00209  | 32.68     | ETDLLLDDSLVSIFGNR |           |           |                 |                 |                   |
| 6        | 9        | IPI00375306 | peroxiredoxin 5 precursor,  | 967.99924  | 1933.984  | 2         | 1         | 2.58    | 0.00  | 1934.00209  | 113.57    | ETDLLLDDSLVSIFGNR |           |           |                 |                 |                   |
| 6        | 9        |             |                             | 967.99924  | 1933.984  | 2         |           |         |       | 1934.00209  | 79.95     | ETDLLLDDSLVSIFGNR |           |           |                 |                 |                   |
| 6        | 9        |             |                             | 967.99924  | 1933.984  | 2         |           |         |       | 1934.00209  | 63.86     | ETDLLLDDSLVSIFGNR |           |           |                 |                 |                   |
| 6        | 9        |             |                             | 967.99924  | 1933.984  | 2         |           |         |       | 1934.00209  | 32.68     | ETDLLLDDSLVSIFGNR |           |           |                 |                 |                   |
| 6        | 9        | IPI00375307 | peroxiredoxin 5 precursor,  | 967.99924  | 1933.984  | 2         | 1         | 2.58    | 0.00  | 1934.00209  | 113.57    | ETDLLLDDSLVSIFGNR |           |           |                 |                 |                   |
| 6        | 9        |             |                             | 967.99924  | 1933.984  | 2         |           |         |       | 1934.00209  | 79.95     | ETDLLLDDSLVSIFGNR |           |           |                 |                 |                   |
| 6        | 9        |             |                             | 967.99924  | 1933.984  | 2         |           |         |       | 1934.00209  | 63.86     | ETDLLLDDSLVSIFGNR |           |           |                 |                 |                   |
| 6        | 9        |             |                             | 967.99924  | 1933.984  | 2         |           |         |       | 1934.00209  | 32.68     | ETDLLLDDSLVSIFGNR |           |           |                 |                 |                   |
| 6        | 9        | IPI00759663 | Isoform Cytoplasmic+pero    | 967.99924  | 1933.984  | 2         | 1         | 2.58    | 0.00  | 1934.00209  | 113.57    | ETDLLLDDSLVSIFGNR |           |           |                 |                 |                   |
| 6        | 9        |             |                             | 967.99924  | 1933.984  | 2         |           |         |       | 1934.00209  | 79.95     | ETDLLLDDSLVSIFGNR |           |           |                 |                 |                   |
| 6        | 9        |             |                             | 967.99924  | 1933.984  | 2         |           |         |       | 1934.00209  | 63.86     | ETDLLLDDSLVSIFGNR |           |           |                 |                 |                   |
| 6        | 9        |             |                             | 967.99924  | 1933.984  | 2         |           |         |       | 1934.00209  | 32.68     | ETDLLLDDSLVSIFGNR |           |           |                 |                 |                   |
| 6        | 10       | IPI00027255 | Myosin light polypeptide 6E | 685.337122 | 1368.66   | 2         | 2         | 2.56    | 0.97  | 1368.655426 | 64.21     | ILYSQCGDVMR       | 685.3371  | 687.3497  | 2.7             | 1.44            | 1.88              |
| 6        | 10       |             |                             | 685.337122 | 1368.66   | 2         |           |         |       | 1368.655426 | 59.23     | ILYSQCGDVMR       |           |           |                 |                 |                   |
| 6        | 10       |             |                             | 691.892432 | 1381.77   | 2         |           |         |       | 1381.758942 | 55.51     | ALGQNPTNAEVLK     | 691.8924  | 693.905   | 1.59            | 0.49            | 3.24              |
| 6        | 10       |             |                             | 691.892432 | 1381.77   | 2         |           |         |       | 1381.758942 | 52.84     | ALGQNPTNAEVLK     |           |           |                 |                 |                   |
| 6        | 10       |             |                             | 693.333123 | 1384.652  | 2         |           |         |       | 1384.650345 | 32.12     | ILYSQCGDVMR       |           |           |                 |                 |                   |
| 6        | 10       |             |                             | 693.333513 | 1384.652  | 2         |           |         |       | 1384.650345 | 37.04     | ILYSQCGDVMR       |           |           |                 |                 |                   |
| 6        | 10       |             |                             | 705.903593 | 1409.793  | 2         |           |         |       | 1409.790253 | 45.01     | ALGQNPTNAEVLK     |           |           |                 |                 |                   |
| 6        | 10       |             |                             | 705.903593 | 1409.793  | 2         |           |         |       | 1409.790253 | 48.06     | ALGQNPTNAEVLK     |           |           |                 |                 |                   |
| 6        | 10       | IPI00335168 | myosin, light polypeptide 6 | 685.337122 | 1368.66   | 2         | 2         | 2.56    | 0.97  | 1368.655426 | 64.21     | ILYSQCGDVMR       |           |           |                 |                 |                   |
| 6        | 10       |             |                             | 685.337122 | 1368.66   | 2         |           |         |       | 1368.655426 | 59.23     | ILYSQCGDVMR       |           |           |                 |                 |                   |
| 6        | 10       |             |                             | 691.892432 | 1381.77   | 2         |           |         |       | 1381.758942 | 55.51     | ALGQNPTNAEVLK     |           |           |                 |                 |                   |
| 6        | 10       |             |                             | 691.892432 | 1381.77   | 2         |           |         |       | 1381.758942 | 52.84     | ALGQNPTNAEVLK     |           |           |                 |                 |                   |
| 6        | 10       |             |                             | 693.333123 | 1384.652  | 2         |           |         |       | 1384.650345 | 32.12     | ILYSQCGDVMR       |           |           |                 |                 |                   |
| 6        | 10       |             |                             | 693.333513 | 1384.652  | 2         |           |         |       | 1384.650345 | 37.04     | ILYSQCGDVMR       |           |           |                 |                 |                   |
| 6        | 10       |             |                             | 705.903593 | 1409.793  | 2         |           |         |       | 1409.790253 | 45.01     | ALGQNPTNAEVLK     |           |           |                 |                 |                   |
| 6        | 10       |             |                             | 705.903593 | 1409.793  | 2         |           |         |       | 1409.790253 | 48.06     | ALGQNPTNAEVLK     |           |           |                 |                 |                   |
| 6        | 10       | IPI00413922 | Isoform Smooth muscle of    | 685.337122 | 1368.66   | 2         | 2         | 2.56    | 0.97  | 1368.655426 | 64.21     | ILYSQCGDVMR       |           |           |                 |                 |                   |
| 6        | 10       |             |                             | 685.337122 | 1368.66   | 2         |           |         |       | 1368.655426 | 59.23     | ILYSQCGDVMR       |           |           |                 |                 |                   |
| 6        | 10       |             |                             | 691.892432 | 1381.77   | 2         |           |         |       | 1381.758942 | 55.51     | ALGQNPTNAEVLK     |           |           |                 |                 |                   |
| 6        | 10       |             |                             | 691.892432 | 1381.77   | 2         |           |         |       | 1381.758942 | 52.84     | ALGQNPTNAEVLK     |           |           |                 |                 |                   |
| 6        | 10       |             |                             | 693.333123 | 1384.652  | 2         |           |         |       | 1384.650345 | 32.12     | ILYSQCGDVMR       |           |           |                 |                 |                   |
| 6        | 10       |             |                             | 693.333513 | 1384.652  | 2         |           |         |       | 1384.650345 | 37.04     | ILYSQCGDVMR       |           |           |                 |                 |                   |
| 6        | 10       |             |                             | 705.903593 | 1409.793  | 2         |           |         |       | 1409.790253 | 45.01     | ALGQNPTNAEVLK     |           |           |                 |                 |                   |
| 6        | 10       |             |                             | 705.903593 | 1409.793  | 2         |           |         |       | 1409.790253 | 48.06     | ALGQNPTNAEVLK     |           |           |                 |                 |                   |
| 6        | 10       | IPI00744444 | 17 kDa protein              | 685.337122 | 1368.66   | 2         | 2         | 2.56    | 0.97  | 1368.655426 | 64.21     | ILYSQCGDVMR       |           |           |                 |                 |                   |
| 6        | 10       |             |                             | 685.337122 | 1368.66   | 2         |           |         |       | 1368.655426 | 59.23     | ILYSQCGDVMR       |           |           |                 |                 |                   |
| 6        | 10       |             |                             | 691.892432 | 1381.77   | 2         |           |         |       | 1381.758942 | 55.51     | ALGQNPTNAEVLK     |           |           |                 |                 |                   |
| 6        | 10       |             |                             | 691.892432 | 1381.77   | 2         |           |         |       | 1381.758942 | 52.84     | ALGQNPTNAEVLK     |           |           |                 |                 |                   |
| 6        | 10       |             |                             | 693.333123 | 1384.652  | 2         |           |         |       | 1384.650345 | 32.12     | ILYSQCGDVMR       |           |           |                 |                 |                   |
| 6        | 10       |             |                             | 693.333513 | 1384.652  | 2         |           |         |       | 1384.650345 | 37.04     | ILYSQCGDVMR       |           |           |                 |                 |                   |
| 6        | 10       |             |                             | 705.903593 | 1409.793  | 2         |           |         |       | 1409.790253 | 45.01     | ALGQNPTNAEVLK     |           |           |                 |                 |                   |
| 6        | 10       |             |                             | 705.903593 | 1409.793  | 2         |           |         |       | 1409.790253 | 48.06     | ALGQNPTNAEVLK     |           |           |                 |                 |                   |
| 6        | 11       | IPI00026260 | Nucleoside diphosphate kin  | 540.269587 | 1078.525  | 2         | 4         | 2.76    | 0.41  | 1078.525391 | 60.52     | GDFCIQVGR         | 540.2696  | 542.2821  | 24.8            | 9.26            | 2.68              |
| 6        | 11       |             |                             | 540.269587 | 1078.525  | 2         |           |         |       | 1078.525391 | 65.21     | GDFCIQVGR         |           |           |                 |                 |                   |
| 6        | 11       |             |                             | 563.318229 | 1124.622  | 2         |           |         |       | 1124.621414 | 25.33     | NIHGSDSVK         | 563.3185  | 567.3436  | 0.62            | 0.28            | 2.21              |
| 6        | 11       |             |                             | 563.318483 | 1124.622  | 2         |           |         |       | 1124.621414 | 34.04     | NIHGSDSVK         |           |           |                 |                 |                   |
| 6        | 11       |             |                             | 563.318483 | 1124.622  | 2         |           |         |       | 1124.621414 | 39.46     | NIHGSDSVK         |           |           |                 |                 |                   |
| 6        | 11       |             |                             | 597.74974  | 1193.485  | 2         |           |         |       | 1193.483612 | 21.96     | SCAHDWVYE         |           |           |                 |                 |                   |
| 6        | 11       |             |                             | 458.270494 | 1371.79   | 3         |           |         |       | 1371.789856 | 31.27     | TFAIKPDGVQR       | 597.7497  | 599.7623  | 2.88            | 0.93            | 3.10              |
| 6        | 11       |             |                             | 458.270494 | 1371.79   | 3         |           |         |       | 1371.789856 | 29        | TFAIKPDGVQR       | 458.2705  | 459.6122  | 8.7             | 2.86            | 3.04              |
| 6        | 11       |             |                             | 467.614483 | 1399.822  | 3         |           |         |       | 1399.821167 | 30.49     | TFAIKPDGVQR       |           |           |                 |                 |                   |
| 6        | 11       |             |                             | 467.614483 | 1399.822  | 3         |           |         |       | 1399.821167 | 20.34     | TFAIKPDGVQR       |           |           |                 |                 |                   |
| 6        | 11       |             |                             | 467.614483 | 1399.822  | 3         |           |         |       | 1399.821167 | 29.07     | TFAIKPDGVQR       |           |           |                 |                 |                   |
| 6        | 11       |             |                             | 605.322844 | 1812.947  | 3         |           |         |       | 1812.942795 | 38.06     | VMLGETNPADSKPGTIR |           |           |                 |                 |                   |
| 6        | 11       |             |                             | 605.322844 | 1812.947  | 3         |           |         |       | 1812.942795 | 37.54     | VMLGETNPADSKPGTIR |           |           |                 |                 |                   |
| 6        | 11       |             |                             | 605.322844 | 1812.947  | 3         |           |         |       | 1812.942795 | 30.15     | VMLGETNPADSKPGTIR |           |           |                 |                 |                   |
| 6        | 11       |             |                             | 610.654606 | 1828.942  | 3         |           |         |       | 1828.937714 | 29.44     | VMLGETNPADSKPGTIR |           |           |                 |                 |                   |
| 6        | 11       |             |                             | 610.654606 | 1828.942  | 3         |           |         |       | 1828.937714 | 28.96     | VMLGETNPADSKPGTIR |           |           |                 |                 |                   |
| 6        | 11       |             |                             | 610.654606 | 1828.942  | 3         |           |         |       | 1828.937714 | 21.08     | VMLGETNPADSKPGTIR |           |           |                 |                 |                   |
| 6        | 11       |             |                             | 614.667601 | 1840.981  | 3         |           |         |       | 1840.974106 | 40.03     | VMLGETNPADSKPGTIR |           |           |                 |                 |                   |

| Band num | prot_hit | nu prot_acc | prot_desc                   | pep_exp_mz                   | pep_exp_n  | pep_exp_z   | quantific   | average           | stdev             | pep_calc_mr | pep_score | pep_seq           | light m/z | heavy m/z   | light intensity | heavy intensity | ratio light/heavy |      |      |      |
|----------|----------|-------------|-----------------------------|------------------------------|------------|-------------|-------------|-------------------|-------------------|-------------|-----------|-------------------|-----------|-------------|-----------------|-----------------|-------------------|------|------|------|
| 6        | 11       |             | NME1-NME2 protein           | 614.667601                   | 1840.981   | 3           | 4           | 2.76              | 0.41              | 1840.974106 | 26.58     | VMLGETNPADSKPGTIR |           |             |                 |                 |                   |      |      |      |
| 6        | 11       |             |                             | 614.667601                   | 1840.981   | 3           |             |                   |                   | 1840.974106 | 28.01     | VMLGETNPADSKPGTIR |           |             |                 |                 |                   |      |      |      |
| 6        | 11       |             |                             | 619.998203                   | 1856.973   | 3           |             |                   |                   | 1856.969025 | 25.45     | VMLGETNPADSKPGTIR |           |             |                 |                 |                   |      |      |      |
| 6        | 11       | IPI00604590 |                             | 540.269587                   | 1078.525   | 2           |             |                   |                   | 1078.525391 | 60.52     | GDFCIQVGR         |           |             |                 |                 |                   |      |      |      |
| 6        | 11       |             |                             | 540.269587                   | 1078.525   | 2           |             |                   |                   | 1078.525391 | 65.21     | GDFCIQVGR         |           |             |                 |                 |                   |      |      |      |
| 6        | 11       |             |                             | 563.318229                   | 1124.622   | 2           |             |                   |                   | 1124.621414 | 25.33     | NIHGSDSVK         |           |             |                 |                 |                   |      |      |      |
| 6        | 11       |             |                             | 563.318483                   | 1124.622   | 2           |             |                   |                   | 1124.621414 | 34.04     | NIHGSDSVK         |           |             |                 |                 |                   |      |      |      |
| 6        | 11       |             |                             | 563.318483                   | 1124.622   | 2           |             |                   |                   | 1124.621414 | 39.46     | NIHGSDSVK         |           |             |                 |                 |                   |      |      |      |
| 6        | 11       |             |                             | 597.74974                    | 1193.485   | 2           |             |                   |                   | 1193.483612 | 21.96     | SCAHDWVYE         |           |             |                 |                 |                   |      |      |      |
| 6        | 11       |             |                             | 458.270494                   | 1371.79    | 3           |             |                   |                   | 1371.789856 | 31.27     | TFIAIKPDGVQR      |           |             |                 |                 |                   |      |      |      |
| 6        | 11       |             |                             | 458.270494                   | 1371.79    | 3           |             |                   |                   | 1371.789856 | 29        | TFIAIKPDGVQR      |           |             |                 |                 |                   |      |      |      |
| 6        | 11       |             |                             | 467.614483                   | 1399.822   | 3           |             |                   |                   | 1399.821167 | 30.49     | TFIAIKPDGVQR      |           |             |                 |                 |                   |      |      |      |
| 6        | 11       |             |                             | 467.614483                   | 1399.822   | 3           |             |                   |                   | 1399.821167 | 20.34     | TFIAIKPDGVQR      |           |             |                 |                 |                   |      |      |      |
| 6        | 11       |             |                             | 467.614483                   | 1399.822   | 3           |             |                   |                   | 1399.821167 | 29.07     | TFIAIKPDGVQR      |           |             |                 |                 |                   |      |      |      |
| 6        | 11       |             |                             | 605.322844                   | 1812.947   | 3           |             |                   |                   | 1812.942795 | 38.06     | VMLGETNPADSKPGTIR |           |             |                 |                 |                   |      |      |      |
| 6        | 11       |             |                             | 605.322844                   | 1812.947   | 3           |             |                   |                   | 1812.942795 | 37.54     | VMLGETNPADSKPGTIR |           |             |                 |                 |                   |      |      |      |
| 6        | 11       |             |                             | 605.322844                   | 1812.947   | 3           |             |                   |                   | 1812.942795 | 30.15     | VMLGETNPADSKPGTIR |           |             |                 |                 |                   |      |      |      |
| 6        | 11       |             |                             | 610.654606                   | 1828.942   | 3           |             |                   |                   | 1828.937714 | 29.44     | VMLGETNPADSKPGTIR |           |             |                 |                 |                   |      |      |      |
| 6        | 11       |             |                             | 610.654606                   | 1828.942   | 3           |             |                   |                   | 1828.937714 | 28.96     | VMLGETNPADSKPGTIR |           |             |                 |                 |                   |      |      |      |
| 6        | 11       |             |                             | 610.654606                   | 1828.942   | 3           |             |                   |                   | 1828.937714 | 21.08     | VMLGETNPADSKPGTIR |           |             |                 |                 |                   |      |      |      |
| 6        | 11       |             | 614.667601                  | 1840.981                     | 3          | 1840.974106 | 40.03       | VMLGETNPADSKPGTIR |                   |             |           |                   |           |             |                 |                 |                   |      |      |      |
| 6        | 11       |             | 614.667601                  | 1840.981                     | 3          | 1840.974106 | 26.58       | VMLGETNPADSKPGTIR |                   |             |           |                   |           |             |                 |                 |                   |      |      |      |
| 6        | 11       |             | 614.667601                  | 1840.981                     | 3          | 1840.974106 | 28.01       | VMLGETNPADSKPGTIR |                   |             |           |                   |           |             |                 |                 |                   |      |      |      |
| 6        | 11       |             | 619.998203                  | 1856.973                     | 3          | 1856.969025 | 25.45       | VMLGETNPADSKPGTIR |                   |             |           |                   |           |             |                 |                 |                   |      |      |      |
| 6        | 12       | IPI00012048 | Nucleoside diphosphate ki   | 540.269587                   | 1078.525   | 2           | 3           | 2.93              | 0.22              | 1078.525391 | 60.52     | GDFCIQVGR         | 540.2696  | 542.2821    | 24.8            | 9.26            | 2.68              |      |      |      |
| 6        | 12       |             |                             | 540.269587                   | 1078.525   | 2           |             |                   |                   | 1078.525391 | 65.21     | GDFCIQVGR         |           |             |                 |                 |                   |      |      |      |
| 6        | 12       |             |                             | 458.270494                   | 1371.79    | 3           |             |                   |                   | 1371.789856 | 31.27     | TFIAIKPDGVQR      |           |             |                 | 458.2705        | 459.6122          | 8.7  | 2.86 | 3.04 |
| 6        | 12       |             |                             | 458.270494                   | 1371.79    | 3           |             |                   |                   | 1371.789856 | 29        | TFIAIKPDGVQR      |           |             |                 |                 |                   |      |      |      |
| 6        | 12       |             |                             | 467.614483                   | 1399.822   | 3           |             |                   |                   | 1399.821167 | 30.49     | TFIAIKPDGVQR      |           |             |                 |                 |                   |      |      |      |
| 6        | 12       |             |                             | 467.614483                   | 1399.822   | 3           |             |                   |                   | 1399.821167 | 20.34     | TFIAIKPDGVQR      |           |             |                 |                 |                   |      |      |      |
| 6        | 12       |             |                             | 467.614483                   | 1399.822   | 3           |             |                   |                   | 1399.821167 | 29.07     | TFIAIKPDGVQR      |           |             |                 |                 |                   |      |      |      |
| 6        | 12       |             |                             | 757.382166                   | 1512.75    | 2           |             |                   |                   | 1512.744415 | 44.66     | NIHGSDSVESAEK     |           |             |                 | 757.3822        | 759.3947          | 0.98 | 0.32 | 3.06 |
| 6        | 12       |             |                             | 757.382166                   | 1512.75    | 2           |             |                   |                   | 1512.744415 | 26.44     | NIHGSDSVESAEK     |           |             |                 |                 |                   |      |      |      |
| 6        | 12       |             |                             | 605.322844                   | 1812.947   | 3           |             |                   |                   | 1812.942795 | 38.06     | VMLGETNPADSKPGTIR |           |             |                 |                 |                   |      |      |      |
| 6        | 12       |             |                             | 605.322844                   | 1812.947   | 3           |             |                   |                   | 1812.942795 | 37.54     | VMLGETNPADSKPGTIR |           |             |                 |                 |                   |      |      |      |
| 6        | 12       |             |                             | 605.322844                   | 1812.947   | 3           |             |                   |                   | 1812.942795 | 30.15     | VMLGETNPADSKPGTIR |           |             |                 |                 |                   |      |      |      |
| 6        | 12       |             |                             | 610.654606                   | 1828.942   | 3           |             |                   |                   | 1828.937714 | 29.44     | VMLGETNPADSKPGTIR |           |             |                 |                 |                   |      |      |      |
| 6        | 12       |             |                             | 610.654606                   | 1828.942   | 3           |             |                   |                   | 1828.937714 | 28.96     | VMLGETNPADSKPGTIR |           |             |                 |                 |                   |      |      |      |
| 6        | 12       |             |                             | 610.654606                   | 1828.942   | 3           |             |                   |                   | 1828.937714 | 21.08     | VMLGETNPADSKPGTIR |           |             |                 |                 |                   |      |      |      |
| 6        | 12       |             |                             | 614.667601                   | 1840.981   | 3           |             |                   |                   | 1840.974106 | 40.03     | VMLGETNPADSKPGTIR |           |             |                 |                 |                   |      |      |      |
| 6        | 12       |             |                             | 614.667601                   | 1840.981   | 3           |             |                   |                   | 1840.974106 | 26.58     | VMLGETNPADSKPGTIR |           |             |                 |                 |                   |      |      |      |
| 6        | 12       |             |                             | 614.667601                   | 1840.981   | 3           |             |                   |                   | 1840.974106 | 28.01     | VMLGETNPADSKPGTIR |           |             |                 |                 |                   |      |      |      |
| 6        | 12       |             |                             | 619.998203                   | 1856.973   | 3           |             |                   |                   | 1856.969025 | 25.45     | VMLGETNPADSKPGTIR |           |             |                 |                 |                   |      |      |      |
| 6        | 12       | IPI00375531 |                             | non-metastatic cells 1, prot | 540.269587 | 1078.525    |             |                   |                   | 2           | 3         | 2.93              | 0.22      | 1078.525391 | 60.52           | GDFCIQVGR       |                   |      |      |      |
| 6        | 12       |             | 540.269587                  |                              | 1078.525   | 2           | 1078.525391 | 65.21             | GDFCIQVGR         |             |           |                   |           |             |                 |                 |                   |      |      |      |
| 6        | 12       |             | 458.270494                  |                              | 1371.79    | 3           | 1371.789856 | 31.27             | TFIAIKPDGVQR      |             |           |                   |           |             |                 |                 |                   |      |      |      |
| 6        | 12       |             | 458.270494                  |                              | 1371.79    | 3           | 1371.789856 | 29                | TFIAIKPDGVQR      |             |           |                   |           |             |                 |                 |                   |      |      |      |
| 6        | 12       |             | 467.614483                  |                              | 1399.822   | 3           | 1399.821167 | 30.49             | TFIAIKPDGVQR      |             |           |                   |           |             |                 |                 |                   |      |      |      |
| 6        | 12       |             | 467.614483                  |                              | 1399.822   | 3           | 1399.821167 | 20.34             | TFIAIKPDGVQR      |             |           |                   |           |             |                 |                 |                   |      |      |      |
| 6        | 12       |             | 467.614483                  |                              | 1399.822   | 3           | 1399.821167 | 29.07             | TFIAIKPDGVQR      |             |           |                   |           |             |                 |                 |                   |      |      |      |
| 6        | 12       |             | 757.382166                  |                              | 1512.75    | 2           | 1512.744415 | 44.66             | NIHGSDSVESAEK     |             |           |                   |           |             |                 |                 |                   |      |      |      |
| 6        | 12       |             | 757.382166                  |                              | 1512.75    | 2           | 1512.744415 | 26.44             | NIHGSDSVESAEK     |             |           |                   |           |             |                 |                 |                   |      |      |      |
| 6        | 12       |             | 605.322844                  |                              | 1812.947   | 3           | 1812.942795 | 38.06             | VMLGETNPADSKPGTIR |             |           |                   |           |             |                 |                 |                   |      |      |      |
| 6        | 12       |             | 605.322844                  |                              | 1812.947   | 3           | 1812.942795 | 37.54             | VMLGETNPADSKPGTIR |             |           |                   |           |             |                 |                 |                   |      |      |      |
| 6        | 12       |             | 605.322844                  |                              | 1812.947   | 3           | 1812.942795 | 30.15             | VMLGETNPADSKPGTIR |             |           |                   |           |             |                 |                 |                   |      |      |      |
| 6        | 12       |             | 610.654606                  |                              | 1828.942   | 3           | 1828.937714 | 29.44             | VMLGETNPADSKPGTIR |             |           |                   |           |             |                 |                 |                   |      |      |      |
| 6        | 12       |             | 610.654606                  |                              | 1828.942   | 3           | 1828.937714 | 28.96             | VMLGETNPADSKPGTIR |             |           |                   |           |             |                 |                 |                   |      |      |      |
| 6        | 12       |             | 610.654606                  |                              | 1828.942   | 3           | 1828.937714 | 21.08             | VMLGETNPADSKPGTIR |             |           |                   |           |             |                 |                 |                   |      |      |      |
| 6        | 12       |             | 614.667601                  |                              | 1840.981   | 3           | 1840.974106 | 40.03             | VMLGETNPADSKPGTIR |             |           |                   |           |             |                 |                 |                   |      |      |      |
| 6        | 12       |             | 614.667601                  |                              | 1840.981   | 3           | 1840.974106 | 26.58             | VMLGETNPADSKPGTIR |             |           |                   |           |             |                 |                 |                   |      |      |      |
| 6        | 12       |             | 614.667601                  |                              | 1840.981   | 3           | 1840.974106 | 28.01             | VMLGETNPADSKPGTIR |             |           |                   |           |             |                 |                 |                   |      |      |      |
| 6        | 12       |             | 619.998203                  |                              | 1856.973   | 3           | 1856.969025 | 25.45             | VMLGETNPADSKPGTIR |             |           |                   |           |             |                 |                 |                   |      |      |      |
| 6        | 13       | IPI00179330 | ubiquitin and ribosomal prc |                              | 548.330767 | 1094.647    | 2           | 2                 | 3.81              | 1.81        |           |                   |           | 1094.647232 | 52.96           | ESTLHLVLR       |                   |      |      |      |

| Band num | prot_hit_nu | prot_acc    | prot_desc                   | pep_exp_mz | pep_exp_n | pep_exp_z | quantific | average | stdev | pep_calc_mr | pep_score | pep_seq   | light m/z | heavy m/z | light intensity | heavy intensity | ratio light/heavy |
|----------|-------------|-------------|-----------------------------|------------|-----------|-----------|-----------|---------|-------|-------------|-----------|-----------|-----------|-----------|-----------------|-----------------|-------------------|
| 6        | 13          |             |                             | 548.330767 | 1094.647  | 2         |           |         |       | 1094.647232 | 47.49     | ESTLHLVLR |           |           |                 |                 |                   |
| 6        | 13          |             |                             | 365.889966 | 1094.648  | 3         |           |         |       | 1094.647232 | 44.39     | ESTLHLVLR | 365.89    | 367.2317  | 16.1            | 6.37            | 2.53              |
| 6        | 13          |             |                             | 365.889966 | 1094.648  | 3         |           |         |       | 1094.647232 | 50.26     | ESTLHLVLR |           |           |                 |                 |                   |
| 6        | 13          |             |                             | 365.889966 | 1094.648  | 3         |           |         |       | 1094.647232 | 53.7      | ESTLHLVLR |           |           |                 |                 |                   |
| 6        | 13          |             |                             | 569.312459 | 1136.61   | 2         |           |         |       | 1136.610199 | 34.8      | TLSDYNIQK | 569.3125  | 573.3376  | 8.86            | 1.74            | 5.09              |
| 6        | 13          |             |                             | 569.312459 | 1136.61   | 2         |           |         |       | 1136.610199 | 44.79     | TLSDYNIQK |           |           |                 |                 |                   |
| 6        | 13          |             |                             | 569.312459 | 1136.61   | 2         |           |         |       | 1136.610199 | 51.95     | TLSDYNIQK |           |           |                 |                 |                   |
| 6        | 13          | IPI00397808 | PREDICTED: similar to ubi   | 548.330767 | 1094.647  | 2         | 2         | 3.81    | 1.81  | 1094.647232 | 52.96     | ESTLHLVLR |           |           |                 |                 |                   |
| 6        | 13          |             |                             | 548.330767 | 1094.647  | 2         |           |         |       | 1094.647232 | 47.49     | ESTLHLVLR |           |           |                 |                 |                   |
| 6        | 13          |             |                             | 365.889966 | 1094.648  | 3         |           |         |       | 1094.647232 | 44.39     | ESTLHLVLR |           |           |                 |                 |                   |
| 6        | 13          |             |                             | 365.889966 | 1094.648  | 3         |           |         |       | 1094.647232 | 50.26     | ESTLHLVLR |           |           |                 |                 |                   |
| 6        | 13          |             |                             | 365.889966 | 1094.648  | 3         |           |         |       | 1094.647232 | 53.7      | ESTLHLVLR |           |           |                 |                 |                   |
| 6        | 13          |             |                             | 569.312459 | 1136.61   | 2         |           |         |       | 1136.610199 | 34.8      | TLSDYNIQK |           |           |                 |                 |                   |
| 6        | 13          |             |                             | 569.312459 | 1136.61   | 2         |           |         |       | 1136.610199 | 44.79     | TLSDYNIQK |           |           |                 |                 |                   |
| 6        | 13          |             |                             | 569.312459 | 1136.61   | 2         |           |         |       | 1136.610199 | 51.95     | TLSDYNIQK |           |           |                 |                 |                   |
| 6        | 13          | IPI00456429 | ubiquitin and ribosomal prc | 548.330767 | 1094.647  | 2         | 2         | 3.81    | 1.81  | 1094.647232 | 52.96     | ESTLHLVLR |           |           |                 |                 |                   |
| 6        | 13          |             |                             | 548.330767 | 1094.647  | 2         |           |         |       | 1094.647232 | 47.49     | ESTLHLVLR |           |           |                 |                 |                   |
| 6        | 13          |             |                             | 365.889966 | 1094.648  | 3         |           |         |       | 1094.647232 | 44.39     | ESTLHLVLR |           |           |                 |                 |                   |
| 6        | 13          |             |                             | 365.889966 | 1094.648  | 3         |           |         |       | 1094.647232 | 50.26     | ESTLHLVLR |           |           |                 |                 |                   |
| 6        | 13          |             |                             | 365.889966 | 1094.648  | 3         |           |         |       | 1094.647232 | 53.7      | ESTLHLVLR |           |           |                 |                 |                   |
| 6        | 13          |             |                             | 569.312459 | 1136.61   | 2         |           |         |       | 1136.610199 | 34.8      | TLSDYNIQK |           |           |                 |                 |                   |
| 6        | 13          |             |                             | 569.312459 | 1136.61   | 2         |           |         |       | 1136.610199 | 44.79     | TLSDYNIQK |           |           |                 |                 |                   |
| 6        | 13          |             |                             | 569.312459 | 1136.61   | 2         |           |         |       | 1136.610199 | 51.95     | TLSDYNIQK |           |           |                 |                 |                   |
| 6        | 13          | IPI00783060 | Ubiquitin                   | 548.330767 | 1094.647  | 2         | 2         | 3.81    | 1.81  | 1094.647232 | 52.96     | ESTLHLVLR |           |           |                 |                 |                   |
| 6        | 13          |             |                             | 548.330767 | 1094.647  | 2         |           |         |       | 1094.647232 | 47.49     | ESTLHLVLR |           |           |                 |                 |                   |
| 6        | 13          |             |                             | 365.889966 | 1094.648  | 3         |           |         |       | 1094.647232 | 44.39     | ESTLHLVLR |           |           |                 |                 |                   |
| 6        | 13          |             |                             | 365.889966 | 1094.648  | 3         |           |         |       | 1094.647232 | 50.26     | ESTLHLVLR |           |           |                 |                 |                   |
| 6        | 13          |             |                             | 365.889966 | 1094.648  | 3         |           |         |       | 1094.647232 | 53.7      | ESTLHLVLR |           |           |                 |                 |                   |
| 6        | 13          |             |                             | 569.312459 | 1136.61   | 2         |           |         |       | 1136.610199 | 34.8      | TLSDYNIQK |           |           |                 |                 |                   |
| 6        | 13          |             |                             | 569.312459 | 1136.61   | 2         |           |         |       | 1136.610199 | 44.79     | TLSDYNIQK |           |           |                 |                 |                   |
| 6        | 13          |             |                             | 569.312459 | 1136.61   | 2         |           |         |       | 1136.610199 | 51.95     | TLSDYNIQK |           |           |                 |                 |                   |
| 6        | 13          | IPI00783778 | 40S ribosomal protein S27:  | 548.330767 | 1094.647  | 2         | 2         | 3.81    | 1.81  | 1094.647232 | 52.96     | ESTLHLVLR |           |           |                 |                 |                   |
| 6        | 13          |             |                             | 548.330767 | 1094.647  | 2         |           |         |       | 1094.647232 | 47.49     | ESTLHLVLR |           |           |                 |                 |                   |
| 6        | 13          |             |                             | 365.889966 | 1094.648  | 3         |           |         |       | 1094.647232 | 44.39     | ESTLHLVLR |           |           |                 |                 |                   |
| 6        | 13          |             |                             | 365.889966 | 1094.648  | 3         |           |         |       | 1094.647232 | 50.26     | ESTLHLVLR |           |           |                 |                 |                   |
| 6        | 13          |             |                             | 365.889966 | 1094.648  | 3         |           |         |       | 1094.647232 | 53.7      | ESTLHLVLR |           |           |                 |                 |                   |
| 6        | 13          |             |                             | 569.312459 | 1136.61   | 2         |           |         |       | 1136.610199 | 34.8      | TLSDYNIQK |           |           |                 |                 |                   |
| 6        | 13          |             |                             | 569.312459 | 1136.61   | 2         |           |         |       | 1136.610199 | 44.79     | TLSDYNIQK |           |           |                 |                 |                   |
| 6        | 13          |             |                             | 569.312459 | 1136.61   | 2         |           |         |       | 1136.610199 | 51.95     | TLSDYNIQK |           |           |                 |                 |                   |
| 6        | 13          | IPI00719280 | ubiquitin B precursor       | 548.330767 | 1094.647  | 2         | 2         | 3.81    | 1.81  | 1094.647232 | 52.96     | ESTLHLVLR |           |           |                 |                 |                   |
| 6        | 13          |             |                             | 548.330767 | 1094.647  | 2         |           |         |       | 1094.647232 | 47.49     | ESTLHLVLR |           |           |                 |                 |                   |
| 6        | 13          |             |                             | 365.889966 | 1094.648  | 3         |           |         |       | 1094.647232 | 44.39     | ESTLHLVLR |           |           |                 |                 |                   |
| 6        | 13          |             |                             | 365.889966 | 1094.648  | 3         |           |         |       | 1094.647232 | 50.26     | ESTLHLVLR |           |           |                 |                 |                   |
| 6        | 13          |             |                             | 365.889966 | 1094.648  | 3         |           |         |       | 1094.647232 | 53.7      | ESTLHLVLR |           |           |                 |                 |                   |
| 6        | 13          |             |                             | 569.312459 | 1136.61   | 2         |           |         |       | 1136.610199 | 34.8      | TLSDYNIQK |           |           |                 |                 |                   |
| 6        | 13          |             |                             | 569.312459 | 1136.61   | 2         |           |         |       | 1136.610199 | 44.79     | TLSDYNIQK |           |           |                 |                 |                   |
| 6        | 13          |             |                             | 569.312459 | 1136.61   | 2         |           |         |       | 1136.610199 | 51.95     | TLSDYNIQK |           |           |                 |                 |                   |
| 6        | 13          | IPI00743241 | 44 kDa protein              | 548.330767 | 1094.647  | 2         | 2         | 3.81    | 1.81  | 1094.647232 | 52.96     | ESTLHLVLR |           |           |                 |                 |                   |
| 6        | 13          |             |                             | 548.330767 | 1094.647  | 2         |           |         |       | 1094.647232 | 47.49     | ESTLHLVLR |           |           |                 |                 |                   |
| 6        | 13          |             |                             | 365.889966 | 1094.648  | 3         |           |         |       | 1094.647232 | 44.39     | ESTLHLVLR |           |           |                 |                 |                   |
| 6        | 13          |             |                             | 365.889966 | 1094.648  | 3         |           |         |       | 1094.647232 | 50.26     | ESTLHLVLR |           |           |                 |                 |                   |
| 6        | 13          |             |                             | 365.889966 | 1094.648  | 3         |           |         |       | 1094.647232 | 53.7      | ESTLHLVLR |           |           |                 |                 |                   |
| 6        | 13          |             |                             | 569.312459 | 1136.61   | 2         |           |         |       | 1136.610199 | 34.8      | TLSDYNIQK |           |           |                 |                 |                   |
| 6        | 13          |             |                             | 569.312459 | 1136.61   | 2         |           |         |       | 1136.610199 | 44.79     | TLSDYNIQK |           |           |                 |                 |                   |
| 6        | 13          |             |                             | 569.312459 | 1136.61   | 2         |           |         |       | 1136.610199 | 51.95     | TLSDYNIQK |           |           |                 |                 |                   |
| 6        | 13          | IPI00743650 | 44 kDa protein              | 548.330767 | 1094.647  | 2         | 2         | 3.81    | 1.81  | 1094.647232 | 52.96     | ESTLHLVLR |           |           |                 |                 |                   |
| 6        | 13          |             |                             | 548.330767 | 1094.647  | 2         |           |         |       | 1094.647232 | 47.49     | ESTLHLVLR |           |           |                 |                 |                   |
| 6        | 13          |             |                             | 365.889966 | 1094.648  | 3         |           |         |       | 1094.647232 | 44.39     | ESTLHLVLR |           |           |                 |                 |                   |
| 6        | 13          |             |                             | 365.889966 | 1094.648  | 3         |           |         |       | 1094.647232 | 50.26     | ESTLHLVLR |           |           |                 |                 |                   |
| 6        | 13          |             |                             | 365.889966 | 1094.648  | 3         |           |         |       | 1094.647232 | 53.7      | ESTLHLVLR |           |           |                 |                 |                   |
| 6        | 13          |             |                             | 569.312459 | 1136.61   | 2         |           |         |       | 1136.610199 | 34.8      | TLSDYNIQK |           |           |                 |                 |                   |
| 6        | 13          |             |                             | 569.312459 | 1136.61   | 2         |           |         |       | 1136.610199 | 44.79     | TLSDYNIQK |           |           |                 |                 |                   |
| 6        | 13          |             |                             | 569.312459 | 1136.61   | 2         |           |         |       | 1136.610199 | 51.95     | TLSDYNIQK |           |           |                 |                 |                   |

| Band num | prot_hit | nu_prot_acc | prot_desc                     | pep_exp_mz | pep_exp_n | pep_exp_z | quantified | average | stdev | pep_calc_mr | pep_score | pep_seq       | light m/z | heavy m/z | light intensity | heavy intensity | ratio light/heavy |
|----------|----------|-------------|-------------------------------|------------|-----------|-----------|------------|---------|-------|-------------|-----------|---------------|-----------|-----------|-----------------|-----------------|-------------------|
| 6        | 13       | IPI00744274 | 44 kDa protein                | 548.330767 | 1094.647  | 2         | 2          | 3.81    | 1.81  | 1094.647232 | 52.96     | ESTLHLVLR     |           |           |                 |                 |                   |
| 6        | 13       |             |                               | 548.330767 | 1094.647  | 2         |            |         |       | 1094.647232 | 47.49     | ESTLHLVLR     |           |           |                 |                 |                   |
| 6        | 13       |             |                               | 365.889966 | 1094.648  | 3         |            |         |       | 1094.647232 | 44.39     | ESTLHLVLR     |           |           |                 |                 |                   |
| 6        | 13       |             |                               | 365.889966 | 1094.648  | 3         |            |         |       | 1094.647232 | 50.26     | ESTLHLVLR     |           |           |                 |                 |                   |
| 6        | 13       |             |                               | 365.889966 | 1094.648  | 3         |            |         |       | 1094.647232 | 53.7      | ESTLHLVLR     |           |           |                 |                 |                   |
| 6        | 13       |             |                               | 569.312459 | 1136.61   | 2         |            |         |       | 1136.610199 | 34.8      | TLSDYNIQK     |           |           |                 |                 |                   |
| 6        | 13       |             |                               | 569.312459 | 1136.61   | 2         |            |         |       | 1136.610199 | 44.79     | TLSDYNIQK     |           |           |                 |                 |                   |
| 6        | 13       |             |                               | 569.312459 | 1136.61   | 2         |            |         |       | 1136.610199 | 51.95     | TLSDYNIQK     |           |           |                 |                 |                   |
| 6        | 13       | IPI00787573 | PREDICTED: similar to Ub      | 548.330767 | 1094.647  | 2         | 2          | 3.81    | 1.81  | 1094.647232 | 52.96     | ESTLHLVLR     |           |           |                 |                 |                   |
| 6        | 13       |             |                               | 548.330767 | 1094.647  | 2         |            |         |       | 1094.647232 | 47.49     | ESTLHLVLR     |           |           |                 |                 |                   |
| 6        | 13       |             |                               | 365.889966 | 1094.648  | 3         |            |         |       | 1094.647232 | 44.39     | ESTLHLVLR     |           |           |                 |                 |                   |
| 6        | 13       |             |                               | 365.889966 | 1094.648  | 3         |            |         |       | 1094.647232 | 50.26     | ESTLHLVLR     |           |           |                 |                 |                   |
| 6        | 13       |             |                               | 365.889966 | 1094.648  | 3         |            |         |       | 1094.647232 | 53.7      | ESTLHLVLR     |           |           |                 |                 |                   |
| 6        | 13       |             |                               | 569.312459 | 1136.61   | 2         |            |         |       | 1136.610199 | 34.8      | TLSDYNIQK     |           |           |                 |                 |                   |
| 6        | 13       |             |                               | 569.312459 | 1136.61   | 2         |            |         |       | 1136.610199 | 44.79     | TLSDYNIQK     |           |           |                 |                 |                   |
| 6        | 13       |             |                               | 569.312459 | 1136.61   | 2         |            |         |       | 1136.610199 | 51.95     | TLSDYNIQK     |           |           |                 |                 |                   |
| 6        | 13       | IPI00784990 | ubiquitin C                   | 548.330767 | 1094.647  | 2         | 2          | 3.81    | 1.81  | 1094.647232 | 52.96     | ESTLHLVLR     |           |           |                 |                 |                   |
| 6        | 13       |             |                               | 548.330767 | 1094.647  | 2         |            |         |       | 1094.647232 | 47.49     | ESTLHLVLR     |           |           |                 |                 |                   |
| 6        | 13       |             |                               | 365.889966 | 1094.648  | 3         |            |         |       | 1094.647232 | 44.39     | ESTLHLVLR     |           |           |                 |                 |                   |
| 6        | 13       |             |                               | 365.889966 | 1094.648  | 3         |            |         |       | 1094.647232 | 50.26     | ESTLHLVLR     |           |           |                 |                 |                   |
| 6        | 13       |             |                               | 365.889966 | 1094.648  | 3         |            |         |       | 1094.647232 | 53.7      | ESTLHLVLR     |           |           |                 |                 |                   |
| 6        | 13       |             |                               | 569.312459 | 1136.61   | 2         |            |         |       | 1136.610199 | 34.8      | TLSDYNIQK     |           |           |                 |                 |                   |
| 6        | 13       |             |                               | 569.312459 | 1136.61   | 2         |            |         |       | 1136.610199 | 44.79     | TLSDYNIQK     |           |           |                 |                 |                   |
| 6        | 13       |             |                               | 569.312459 | 1136.61   | 2         |            |         |       | 1136.610199 | 51.95     | TLSDYNIQK     |           |           |                 |                 |                   |
| 6        | 13       |             |                               | 569.312459 | 1136.61   | 2         |            |         |       | 1136.610199 | 44.79     | TLSDYNIQK     |           |           |                 |                 |                   |
| 6        | 14       | IPI00419585 | Peptidyl-prolyl cis-trans iso | 357.719552 | 713.4246  | 2         | 3          | 5.61    | 2.02  | 713.424866  | 26.23     | HVVFQK        | 357.7196  | 359.7321  | 2.56            | 0.49            | 5.22              |
| 6        | 14       |             |                               | 357.719552 | 713.4246  | 2         |            |         |       | 713.424866  | 23.23     | HVVFQK        |           |           |                 |                 |                   |
| 6        | 14       |             |                               | 371.735244 | 741.4559  | 2         |            |         |       | 741.456177  | 25.25     | HVVFQK        |           |           |                 |                 |                   |
| 6        | 14       |             |                               | 638.338818 | 1274.663  | 2         |            |         |       | 1274.654022 | 42.83     | KITIADCGQLE   |           |           |                 |                 |                   |
| 6        | 14       |             |                               | 652.352975 | 1302.691  | 2         |            |         |       | 1302.68779  | 33.92     | KITIADCGQLE   | 652.353   | 656.3781  | 8.5             | 1.09            | 7.80              |
| 6        | 14       |             |                               | 652.352975 | 1302.691  | 2         |            |         |       | 1302.68779  | 36.82     | KITIADCGQLE   |           |           |                 |                 |                   |
| 6        | 14       |             |                               | 652.352975 | 1302.691  | 2         |            |         |       | 1302.68779  | 58.53     | KITIADCGQLE   |           |           |                 |                 |                   |
| 6        | 14       |             |                               | 661.810345 | 1321.606  | 2         |            |         |       | 1321.603027 | 40.4      | EGMNIVEAMER   | 661.8104  | 663.823   | 3.28            | 0.86            | 3.81              |
| 6        | 14       |             |                               | 661.810345 | 1321.606  | 2         |            |         |       | 1321.603027 | 44.37     | EGMNIVEAMER   |           |           |                 |                 |                   |
| 6        | 14       |             |                               | 661.810423 | 1321.606  | 2         |            |         |       | 1321.603027 | 51.79     | EGMNIVEAMER   |           |           |                 |                 |                   |
| 6        | 14       |             |                               | 669.807465 | 1337.6    | 2         |            |         |       | 1337.597946 | 44.58     | EGMNIVEAMER   |           |           |                 |                 |                   |
| 6        | 14       | IPI00472718 | Peptidylprolyl isomerase A    | 357.719552 | 713.4246  | 2         | 3          | 5.61    | 2.02  | 713.424866  | 26.23     | HVVFQK        |           |           |                 |                 |                   |
| 6        | 14       |             |                               | 357.719552 | 713.4246  | 2         |            |         |       | 713.424866  | 23.23     | HVVFQK        |           |           |                 |                 |                   |
| 6        | 14       |             |                               | 371.735244 | 741.4559  | 2         |            |         |       | 741.456177  | 25.25     | HVVFQK        |           |           |                 |                 |                   |
| 6        | 14       |             |                               | 638.338818 | 1274.663  | 2         |            |         |       | 1274.654022 | 42.83     | KITIADCGQLE   |           |           |                 |                 |                   |
| 6        | 14       |             |                               | 652.352975 | 1302.691  | 2         |            |         |       | 1302.68779  | 33.92     | KITIADCGQLE   |           |           |                 |                 |                   |
| 6        | 14       |             |                               | 652.352975 | 1302.691  | 2         |            |         |       | 1302.68779  | 36.82     | KITIADCGQLE   |           |           |                 |                 |                   |
| 6        | 14       |             |                               | 652.352975 | 1302.691  | 2         |            |         |       | 1302.68779  | 58.53     | KITIADCGQLE   |           |           |                 |                 |                   |
| 6        | 14       |             |                               | 661.810345 | 1321.606  | 2         |            |         |       | 1321.603027 | 40.4      | EGMNIVEAMER   |           |           |                 |                 |                   |
| 6        | 14       |             |                               | 661.810345 | 1321.606  | 2         |            |         |       | 1321.603027 | 44.37     | EGMNIVEAMER   |           |           |                 |                 |                   |
| 6        | 14       |             |                               | 661.810423 | 1321.606  | 2         |            |         |       | 1321.603027 | 51.79     | EGMNIVEAMER   |           |           |                 |                 |                   |
| 6        | 14       |             |                               | 669.807465 | 1337.6    | 2         |            |         |       | 1337.597946 | 44.58     | EGMNIVEAMER   |           |           |                 |                 |                   |
| 6        | 15       | IPI00000811 | Proteasome subunit beta t     | 556.291528 | 1110.569  | 2         | 3          | 2.60    | 0.53  | 1110.569382 | 40.99     | TTTGSYIANR    | 556.2919  | 558.3045  | 3.28            | 1.52            | 2.16              |
| 6        | 15       |             |                               | 556.291895 | 1110.569  | 2         |            |         |       | 1110.569382 | 54.4      | TTTGSYIANR    |           |           |                 |                 |                   |
| 6        | 15       |             |                               | 556.291895 | 1110.569  | 2         |            |         |       | 1110.569382 | 43.71     | TTTGSYIANR    |           |           |                 |                 |                   |
| 6        | 15       |             |                               | 569.846721 | 1137.679  | 2         |            |         |       | 1137.678192 | 28.6      | QVLLGDQIPK    | 569.8467  | 571.8593  | 2.05            | 0.83            | 2.47              |
| 6        | 15       |             |                               | 572.322967 | 1142.631  | 2         |            |         |       | 1142.631943 | 53.41     | LAAIAESGVER   | 572.323   | 574.3355  | 9.97            | 3.13            | 3.19              |
| 6        | 15       |             |                               | 572.322967 | 1142.631  | 2         |            |         |       | 1142.631943 | 64.94     | LAAIAESGVER   |           |           |                 |                 |                   |
| 6        | 16       | IPI00219153 | 60S ribosomal protein L22     | 635.860098 | 1269.706  | 2         | 1          | 2.54    | 0.00  | 1269.706482 | 88.66     | AGNLGGGVVTIER | 635.8601  | 637.8727  | 16.1            | 6.34            | 2.54              |
| 6        | 16       |             |                               | 635.860098 | 1269.706  | 2         |            |         |       | 1269.706482 | 74.43     | AGNLGGGVVTIER |           |           |                 |                 |                   |
| 6        | 16       | IPI00787417 | PREDICTED: similar to 60S     | 635.860098 | 1269.706  | 2         | 1          | 2.54    | 0.00  | 1269.706482 | 88.66     | AGNLGGGVVTIER |           |           |                 |                 |                   |
| 6        | 16       |             |                               | 635.860098 | 1269.706  | 2         |            |         |       | 1269.706482 | 74.43     | AGNLGGGVVTIER |           |           |                 |                 |                   |
| 6        | 17       | IPI00221222 | Activated RNA polymerase      | 644.824126 | 1287.634  | 2         | 1          | 2.82    | 0.00  | 1287.633102 | 60.2      | EQISDIDDAVR   | 644.8241  | 646.8367  | 8.33            | 2.95            | 2.82              |
| 6        | 17       |             |                               | 644.824126 | 1287.634  | 2         |            |         |       | 1287.633102 | 69.02     | EQISDIDDAVR   |           |           |                 |                 |                   |
| 6        | 18       | IPI00013917 | 40S ribosomal protein S12     | 547.820517 | 1093.626  | 2         | 1          | 4.69    | 0.00  | 1093.626831 | 42.94     | TALIHDLGLAR   |           |           |                 |                 |                   |
| 6        | 18       |             |                               | 547.820517 | 1093.626  | 2         |            |         |       | 1093.626831 | 43.4      | TALIHDLGLAR   |           |           |                 |                 |                   |
| 6        | 18       |             |                               | 547.820517 | 1093.626  | 2         |            |         |       | 1093.626831 | 27.77     | TALIHDLGLAR   |           |           |                 |                 |                   |
| 6        | 18       |             |                               | 365.55016  | 1093.629  | 3         |            |         |       | 1093.626831 | 48.12     | TALIHDLGLAR   | 365.5502  | 366.8919  | 5.11            | 1.09            | 4.69              |
| 6        | 18       |             |                               | 365.55016  | 1093.629  | 3         |            |         |       | 1093.626831 | 52.65     | TALIHDLGLAR   |           |           |                 |                 |                   |

| Band num | prot_hit | nu          | prot_acc | prot_desc                  | pep_exp_mz | pep_exp_n | pep_exp_z | quantific | average | stdev | pep_calc_mr | pep_score | pep_seq          | light m/z | heavy m/z | light intensity | heavy intensity | ratio light/heavy |
|----------|----------|-------------|----------|----------------------------|------------|-----------|-----------|-----------|---------|-------|-------------|-----------|------------------|-----------|-----------|-----------------|-----------------|-------------------|
| 6        | 18       | IPI00456898 |          | PREDICTED: similar to rib  | 547.820517 | 1093.626  | 2         | 1         | 4.69    | 0.00  | 1093.626831 | 42.94     | TALIHDLGLAR      |           |           |                 |                 |                   |
| 6        | 18       |             |          |                            | 547.820517 | 1093.626  | 2         |           |         |       | 1093.626831 | 43.4      | TALIHDLGLAR      |           |           |                 |                 |                   |
| 6        | 18       |             |          |                            | 547.820517 | 1093.626  | 2         |           |         |       | 1093.626831 | 27.77     | TALIHDLGLAR      |           |           |                 |                 |                   |
| 6        | 18       |             |          |                            | 365.55016  | 1093.629  | 3         |           |         |       | 1093.626831 | 48.12     | TALIHDLGLAR      |           |           |                 |                 |                   |
| 6        | 18       |             |          |                            | 365.55016  | 1093.629  | 3         |           |         |       | 1093.626831 | 52.65     | TALIHDLGLAR      |           |           |                 |                 |                   |
| 6        | 18       | IPI00514100 |          | Ribosomal protein S12      | 547.820517 | 1093.626  | 2         | 1         | 4.69    | 0.00  | 1093.626831 | 42.94     | TALIHDLGLAR      |           |           |                 |                 |                   |
| 6        | 18       |             |          |                            | 547.820517 | 1093.626  | 2         |           |         |       | 1093.626831 | 43.4      | TALIHDLGLAR      |           |           |                 |                 |                   |
| 6        | 18       |             |          |                            | 547.820517 | 1093.626  | 2         |           |         |       | 1093.626831 | 27.77     | TALIHDLGLAR      |           |           |                 |                 |                   |
| 6        | 18       |             |          |                            | 365.55016  | 1093.629  | 3         |           |         |       | 1093.626831 | 48.12     | TALIHDLGLAR      |           |           |                 |                 |                   |
| 6        | 18       |             |          |                            | 365.55016  | 1093.629  | 3         |           |         |       | 1093.626831 | 52.65     | TALIHDLGLAR      |           |           |                 |                 |                   |
| 6        | 19       | IPI00024920 |          | ATP synthase delta chain,  | 730.378363 | 1458.742  | 2         | 1         | 2.35    | 0.00  | 1458.733856 | 85.65     | AQAEVLGTADAEATR  | 730.3784  | 732.3909  | 1.53            | 0.65            | 2.35              |
| 6        | 20       | IPI00221089 |          | 40S ribosomal protein S13  | 436.285178 | 870.5558  | 2         | 2         | 1.70    | 0.98  | 870.55629   | 36.12     | LILIESR          | 436.2852  | 438.2977  | 96.6            | 95.9            | 1.01              |
| 6        | 20       |             |          |                            | 560.313651 | 1118.613  | 2         |           |         |       | 1118.61084  | 61.62     | GLSQSALPYR       | 560.3137  | 562.3262  | 2.28            | 0.95            | 2.40              |
| 6        | 20       |             |          |                            | 560.313651 | 1118.613  | 2         |           |         |       | 1118.61084  | 51.13     | GLSQSALPYR       |           |           |                 |                 |                   |
| 6        | 21       | IPI00010214 |          | Protein S100-A14           | 848.380247 | 1694.746  | 2         | 1         | L       | 0.00  | 1694.740784 | 84.77     | SANAEDAQEFSDVER  | 848.3803  | 850.3928  | 0.71            | 0               | L                 |
| 6        | 22       | IPI00030362 |          | Proteolipid protein 2      | 638.814486 | 1275.614  | 2         | 1         | 4.31    | 0.00  | 1275.611984 | 35.62     | HTAAPTPADGPV     | 638.8145  | 640.8271  | 6.73            | 1.56            | 4.31              |
| 6        | 22       |             |          |                            | 638.814486 | 1275.614  | 2         |           |         |       | 1275.611984 | 36.4      | HTAAPTPADGPV     |           |           |                 |                 |                   |
| 6        | 22       |             |          |                            | 638.814516 | 1275.614  | 2         |           |         |       | 1275.611984 | 62.82     | HTAAPTPADGPV     |           |           |                 |                 |                   |
| 6        | 23       | IPI00012011 |          | Cofilin-1                  | 683.336487 | 1364.658  | 2         | 2         | 1.72    | 0.44  | 1364.652435 | 49        | YALYDATYETK      | 683.3365  | 685.349   | 60.2            | 42.9            | 1.40              |
| 6        | 23       |             |          |                            | 683.336487 | 1364.658  | 2         |           |         |       | 1364.652435 | 49.27     | YALYDATYETK      |           |           |                 |                 |                   |
| 6        | 23       |             |          |                            | 616.293293 | 1845.858  | 3         |           |         |       | 1845.870377 | 21.8      | HELQANCYEEVKDR   | 616.2933  | 618.9767  | 0.71            | 0.35            | 2.03              |
| 6        | 23       |             |          |                            | 616.293293 | 1845.858  | 3         |           |         |       | 1845.870377 | 27.89     | HELQANCYEEVKDR   |           |           |                 |                 |                   |
| 6        | 23       |             |          |                            | 616.300479 | 1845.88   | 3         |           |         |       | 1845.870377 | 20.31     | HELQANCYEEVKDR   |           |           |                 |                 |                   |
| 6        | 23       |             |          |                            | 616.300479 | 1845.88   | 3         |           |         |       | 1845.870377 | 22.83     | HELQANCYEEVKDR   |           |           |                 |                 |                   |
| 6        | 23       |             |          |                            | 616.300479 | 1845.88   | 3         |           |         |       | 1845.870377 | 27.88     | HELQANCYEEVKDR   |           |           |                 |                 |                   |
| 6        | 23       | IPI00784459 |          | 24 kDa protein             | 683.336487 | 1364.658  | 2         | 2         | 1.72    | 0.44  | 1364.652435 | 49        | YALYDATYETK      |           |           |                 |                 |                   |
| 6        | 23       |             |          |                            | 683.336487 | 1364.658  | 2         |           |         |       | 1364.652435 | 49.27     | YALYDATYETK      |           |           |                 |                 |                   |
| 6        | 23       |             |          |                            | 616.293293 | 1845.858  | 3         |           |         |       | 1845.870377 | 21.8      | HELQANCYEEVKDR   |           |           |                 |                 |                   |
| 6        | 23       |             |          |                            | 616.293293 | 1845.858  | 3         |           |         |       | 1845.870377 | 27.89     | HELQANCYEEVKDR   |           |           |                 |                 |                   |
| 6        | 23       |             |          |                            | 616.300479 | 1845.88   | 3         |           |         |       | 1845.870377 | 20.31     | HELQANCYEEVKDR   |           |           |                 |                 |                   |
| 6        | 23       |             |          |                            | 616.300479 | 1845.88   | 3         |           |         |       | 1845.870377 | 22.83     | HELQANCYEEVKDR   |           |           |                 |                 |                   |
| 6        | 23       |             |          |                            | 616.300479 | 1845.88   | 3         |           |         |       | 1845.870377 | 27.88     | HELQANCYEEVKDR   |           |           |                 |                 |                   |
| 6        | 24       | IPI00219910 |          | 23 kDa protein             | 399.220467 | 1194.64   | 3         | 1         | 2.26    | 0.00  | 1194.638138 | 37.09     | LQAVTDDHIR       |           |           |                 |                 |                   |
| 6        | 24       |             |          |                            | 399.220467 | 1194.64   | 3         |           |         |       | 1194.638138 | 40.69     | LQAVTDDHIR       |           |           |                 |                 |                   |
| 6        | 24       |             |          |                            | 598.328019 | 1194.641  | 2         |           |         |       | 1194.638138 | 23.06     | LQAVTDDHIR       | 598.328   | 600.3406  | 0.97            | 0.43            | 2.26              |
| 6        | 24       |             |          |                            | 598.328019 | 1194.641  | 2         |           |         |       | 1194.638138 | 45.76     | LQAVTDDHIR       |           |           |                 |                 |                   |
| 6        | 24       | IPI00783862 |          | Flavin reductase           | 399.220467 | 1194.64   | 3         | 1         | 2.26    | 0.00  | 1194.638138 | 37.09     | LQAVTDDHIR       |           |           |                 |                 |                   |
| 6        | 24       |             |          |                            | 399.220467 | 1194.64   | 3         |           |         |       | 1194.638138 | 40.69     | LQAVTDDHIR       |           |           |                 |                 |                   |
| 6        | 24       |             |          |                            | 598.328019 | 1194.641  | 2         |           |         |       | 1194.638138 | 23.06     | LQAVTDDHIR       |           |           |                 |                 |                   |
| 6        | 24       |             |          |                            | 598.328019 | 1194.641  | 2         |           |         |       | 1194.638138 | 45.76     | LQAVTDDHIR       |           |           |                 |                 |                   |
| 6        | 25       | IPI00024919 |          | Thioredoxin-dependent per  | 617.849451 | 1233.684  | 2         | 1         | 3.02    | 0.00  | 1233.685394 | 35.76     | HLSVNDLPVGR      | 617.8495  | 619.862   | 9.45            | 3.13            | 3.02              |
| 6        | 25       |             |          |                            | 617.849451 | 1233.684  | 2         |           |         |       | 1233.685394 | 43.41     | HLSVNDLPVGR      |           |           |                 |                 |                   |
| 6        | 25       |             |          |                            | 617.849451 | 1233.684  | 2         |           |         |       | 1233.685394 | 38.79     | HLSVNDLPVGR      |           |           |                 |                 |                   |
| 6        | 25       | IPI00374151 |          | peroxiredoxin 3 isoform b  | 617.849451 | 1233.684  | 2         | 1         | 3.02    | 0.00  | 1233.685394 | 35.76     | HLSVNDLPVGR      |           |           |                 |                 |                   |
| 6        | 25       |             |          |                            | 617.849451 | 1233.684  | 2         |           |         |       | 1233.685394 | 43.41     | HLSVNDLPVGR      |           |           |                 |                 |                   |
| 6        | 25       |             |          |                            | 617.849451 | 1233.684  | 2         |           |         |       | 1233.685394 | 38.79     | HLSVNDLPVGR      |           |           |                 |                 |                   |
| 6        | 26       | IPI00298547 |          | Protein DJ-1               | 451.770144 | 901.5257  | 2         | 2         | 2.35    | 1.88  | 901.525726  | 42.49     | DGLILTSR         | 451.7701  | 453.7827  | 9.72            | 2.64            | 3.68              |
| 6        | 26       |             |          |                            | 562.639441 | 1684.896  | 3         |           |         |       | 1684.895447 | 32.54     | VTVAGLAGKDPVQCSR |           |           |                 |                 |                   |
| 6        | 26       |             |          |                            | 858.451992 | 1714.889  | 2         |           |         |       | 1714.883575 | 40.28     | DVVICPDASLEDAKK  |           |           |                 |                 |                   |
| 6        | 27       | IPI00215780 |          | 40S ribosomal protein S19  | 581.797833 | 1161.581  | 2         | 1         | 3.07    | 0.00  | 1161.580261 | 59.3      | DVNQEEFVR        | 858.452   | 862.4771  | 0.51            | 0.5             | 1.02              |
| 6        | 28       | IPI00555956 |          | Proteasome subunit beta t  | 506.290713 | 1010.567  | 2         | 2         | 3.63    | 0.90  | 1010.568604 | 20.37     | AIHSWLTR         | 581.7978  | 583.8104  | 1.72            | 0.56            | 3.07              |
| 6        | 28       |             |          |                            | 337.863201 | 1010.568  | 3         |           |         |       | 1010.568604 | 26.74     | AIHSWLTR         | 337.8632  | 339.2049  | 3.37            | 0.79            | 4.27              |
| 6        | 28       |             |          |                            | 337.863201 | 1010.568  | 3         |           |         |       | 1010.568604 | 27.48     | AIHSWLTR         |           |           |                 |                 |                   |
| 6        | 28       |             |          |                            | 578.82066  | 1155.627  | 2         |           |         |       | 1155.627228 | 29.48     | QPVLSTQTEAR      | 578.8207  | 580.8332  | 5.01            | 1.67            | 3.00              |
| 6        | 28       |             |          |                            | 578.82066  | 1155.627  | 2         |           |         |       | 1155.627228 | 55.98     | QPVLSTQTEAR      |           |           |                 |                 |                   |
| 6        | 28       |             |          |                            | 578.82066  | 1155.627  | 2         |           |         |       | 1155.627228 | 27.77     | QPVLSTQTEAR      |           |           |                 |                 |                   |
| 6        | 29       | IPI00010270 |          | Ras-related C3 botulinum t | 489.766523 | 977.5185  | 2         | 2         | 7.52    | 1.95  | 977.52063   | 25.53     | TVFDEAIR         | 489.7665  | 491.7791  | 14.2            | 2.31            | 6.15              |
| 6        | 29       |             |          |                            | 489.766538 | 977.5185  | 2         |           |         |       | 977.52063   | 40.48     | TVFDEAIR         |           |           |                 |                 |                   |
| 6        | 29       |             |          |                            | 558.808859 | 1115.603  | 2         |           |         |       | 1115.603287 | 48.59     | CVVVGDAVGK       | 558.8089  | 562.834   | 0.89            | 0.1             | 8.90              |
| 6        | 29       | IPI00010271 |          | Isoform A of Ras-related C | 489.766523 | 977.5185  | 2         | 2         | 7.52    | 1.95  | 977.52063   | 25.53     | TVFDEAIR         |           |           |                 |                 |                   |
| 6        | 29       |             |          |                            | 489.766538 | 977.5185  | 2         |           |         |       | 977.52063   | 40.48     | TVFDEAIR         |           |           |                 |                 |                   |
| 6        | 29       |             |          |                            | 558.808859 | 1115.603  | 2         |           |         |       | 1115.603287 | 48.59     | CVVVGDAVGK       |           |           |                 |                 |                   |
| 6        | 29       | IPI00023138 |          | Ras-related C3 botulinum t | 489.766523 | 977.5185  | 2         | 2         | 7.52    | 1.95  | 977.52063   | 25.53     | TVFDEAIR         |           |           |                 |                 |                   |

| Band num | prot_hit_nu | prot_acc    | prot_desc                    | pep_exp_mz | pep_exp_n | pep_exp_z | quantific | average | stdev | pep_calc_mr | pep_score | pep_seq        | light m/z | heavy m/z | light intensity | heavy intensity | ratio light/heavy |
|----------|-------------|-------------|------------------------------|------------|-----------|-----------|-----------|---------|-------|-------------|-----------|----------------|-----------|-----------|-----------------|-----------------|-------------------|
| 6        | 29          |             |                              | 489.766538 | 977.5185  | 2         |           |         |       | 977.52063   | 40.48     | TVFDEAIR       |           |           |                 |                 |                   |
| 6        | 29          |             |                              | 558.808859 | 1115.603  | 2         |           |         |       | 1115.603287 | 48.59     | CVVVGDGAVGK    |           |           |                 |                 |                   |
| 6        | 29          | IPI00219675 | Isoform B of Ras-related C   | 489.766523 | 977.5185  | 2         | 2         | 7.52    | 1.95  | 977.52063   | 25.53     | TVFDEAIR       |           |           |                 |                 |                   |
| 6        | 29          |             |                              | 489.766538 | 977.5185  | 2         |           |         |       | 977.52063   | 40.48     | TVFDEAIR       |           |           |                 |                 |                   |
| 6        | 29          |             |                              | 558.808859 | 1115.603  | 2         |           |         |       | 1115.603287 | 48.59     | CVVVGDGAVGK    |           |           |                 |                 |                   |
| 6        | 30          | IPI00395906 | Similar to RIKEN cDNA 23     | 399.22494  | 1194.653  | 3         | 2         | 2.83    | 1.88  | 1194.653381 | 25.66     | NPYAHISIPR     | 399.2249  | 400.5666  | 2.36            | 1.57            | 1.50              |
| 6        | 30          |             |                              | 706.391067 | 1410.768  | 2         |           |         |       | 1410.764359 | 53.36     | QAGLTYAGPPPVGR | 706.3911  | 708.4036  | 1.75            | 0.42            | 4.17              |
| 6        | 31          | IPI00219446 | Phosphatidylethanolamine-    | 566.277555 | 1130.541  | 2         | 1         | 30.08   | 0.00  | 1130.541458 | 50.76     | CDEPILSNR      | 566.2776  | 568.2901  | 3.61            | 0.12            | 30.08             |
| 6        | 32          | IPI00375704 | Hypothetical protein DKFZ]   | 507.27489  | 1012.535  | 2         | 2         | 2.94    | 0.04  | 1012.536621 | 37.51     | AIYQATYR       |           |           |                 |                 |                   |
| 6        | 32          |             |                              | 507.27489  | 1012.535  | 2         |           |         |       | 1012.536621 | 35.38     | AIYQATYR       |           |           |                 |                 |                   |
| 6        | 32          |             |                              | 526.796493 | 1051.578  | 2         |           |         |       | 1051.579865 | 28.63     | HGVIVAADSR     |           |           |                 |                 |                   |
| 6        | 32          |             |                              | 526.796493 | 1051.578  | 2         |           |         |       | 1051.579865 | 36.24     | HGVIVAADSR     |           |           |                 |                 |                   |
| 6        | 32          | IPI00479306 | proteasome beta 5 subunit    | 507.27489  | 1012.535  | 2         | 2         | 2.94    | 0.04  | 1012.536621 | 37.51     | AIYQATYR       | 507.2749  | 509.2875  | 5.65            | 1.9             | 2.97              |
| 6        | 32          |             |                              | 507.27489  | 1012.535  | 2         |           |         |       | 1012.536621 | 35.38     | AIYQATYR       |           |           |                 |                 |                   |
| 6        | 32          |             |                              | 526.796493 | 1051.578  | 2         |           |         |       | 1051.579865 | 28.63     | HGVIVAADSR     | 526.7965  | 528.8091  | 1.02            | 0.35            | 2.91              |
| 6        | 32          |             |                              | 526.796493 | 1051.578  | 2         |           |         |       | 1051.579865 | 36.24     | HGVIVAADSR     |           |           |                 |                 |                   |
| 6        | 33          | IPI00062120 | Protein S100-A16             | 465.245328 | 1392.714  | 3         | 1         | 5.18    | 0.00  | 1392.713409 | 32.64     | LIQNLDANHDGR   |           |           |                 |                 |                   |
| 6        | 33          |             |                              | 697.367842 | 1392.721  | 2         |           |         |       | 1392.713409 | 41.39     | LIQNLDANHDGR   | 697.3678  | 699.3804  | 0.88            | 0.17            | 5.18              |
| 6        | 34          | IPI00036554 | Myeloid leukemia factor 1    | 696.867314 | 1391.72   | 2         | 1         | L       | 0.00  | 1391.710297 | 41.79     | KAMRSDSGLEK    | 696.8673  | 700.8924  | 2.5             | 0               | L                 |
| 6        | 34          |             |                              | 696.867354 | 1391.72   | 2         |           |         |       | 1391.70784  | 35.39     | KAMRSDSGLEK    |           |           |                 |                 |                   |
| 6        | 34          | IPI00171189 | CDNA FLJ39570 fis, clone     | 696.867314 | 1391.72   | 2         | 1         | L       | 0.00  | 1391.710297 | 41.79     | KAMRSDSGLEK    |           |           |                 |                 |                   |
| 6        | 34          |             |                              | 696.867354 | 1391.72   | 2         |           |         |       | 1391.70784  | 35.39     | KAMRSDSGLEK    |           |           |                 |                 |                   |
| 6        | 34          | IPI00719604 | Myeloid leukemia factor 1 \  | 696.867314 | 1391.72   | 2         | 1         | L       | 0.00  | 1391.710297 | 41.79     | KAMRSDSGLEK    |           |           |                 |                 |                   |
| 6        | 34          |             |                              | 696.867354 | 1391.72   | 2         |           |         |       | 1391.70784  | 35.39     | KAMRSDSGLEK    |           |           |                 |                 |                   |
| 6        | 34          | IPI00744606 | Myeloid leukemia factor 1 \  | 696.867314 | 1391.72   | 2         | 1         | L       | 0.00  | 1391.710297 | 41.79     | KAMRSDSGLEK    |           |           |                 |                 |                   |
| 6        | 34          |             |                              | 696.867354 | 1391.72   | 2         |           |         |       | 1391.70784  | 35.39     | KAMRSDSGLEK    |           |           |                 |                 |                   |
| 6        | 35          | IPI00013296 | 40S ribosomal protein S18    | 550.319192 | 1098.624  | 2         | 1         | 5.13    | 0.00  | 1098.62439  | 44.4      | VITIMQNPR      | 550.3192  | 552.3318  | 3.85            | 0.75            | 5.13              |
| 6        | 35          | IPI00642513 | PREDICTED: similar to rib    | 550.319192 | 1098.624  | 2         | 1         | 5.13    | 0.00  | 1098.62439  | 44.4      | VITIMQNPR      |           |           |                 |                 |                   |
| 6        | 36          | IPI00026302 | 60S ribosomal protein L31    | 508.791539 | 1015.569  | 2         | 1         | 2.92    | 0.00  | 1015.568634 | 43.91     | SAINEVVTR      | 508.7915  | 510.8041  | 1.43            | 0.49            | 2.92              |
| 6        | 36          | IPI00743317 | Similar to 60S ribosomal pr  | 508.791539 | 1015.569  | 2         | 1         | 2.92    | 0.00  | 1015.568634 | 43.91     | SAINEVVTR      |           |           |                 |                 |                   |
| 6        | 36          | IPI00787579 | PREDICTED: similar to rib    | 508.791539 | 1015.569  | 2         | 1         | 2.92    | 0.00  | 1015.568634 | 43.91     | SAINEVVTR      |           |           |                 |                 |                   |
| 6        | 37          | IPI00550363 | Transgelin-2                 | 623.834714 | 1245.655  | 2         | 1         | 3.09    | 0.00  | 1245.652374 | 42.41     | NVIGLQMGTNR    | 623.8347  | 625.8473  | 0.99            | 0.32            | 3.09              |
| 6        | 37          | IPI00644531 | 21 kDa protein               | 623.834714 | 1245.655  | 2         | 1         | 3.09    | 0.00  | 1245.652374 | 42.41     | NVIGLQMGTNR    |           |           |                 |                 |                   |
| 6        | 37          | IPI00647915 | 24 kDa protein               | 623.834714 | 1245.655  | 2         | 1         | 3.09    | 0.00  | 1245.652374 | 42.41     | NVIGLQMGTNR    |           |           |                 |                 |                   |
| 6        | 38          | IPI00027350 | Peroxioredoxin-2             | 476.741646 | 951.4687  | 2         | 2         | 3.86    | 1.21  | 951.468597  | 34.3      | TDEGIAYR       | 476.7417  | 478.7542  | 0.45            | 0.15            | 3.00              |
| 6        | 38          |             |                              | 476.741646 | 951.4687  | 2         |           |         |       | 951.468597  | 23.14     | TDEGIAYR       |           |           |                 |                 |                   |
| 6        | 38          |             |                              | 503.78283  | 1005.551  | 2         |           |         |       | 1005.55191  | 33.55     | ATAVVDGAFK     | 503.7828  | 505.7954  | 0.99            | 0.21            | 4.71              |
| 6        | 38          | IPI00375400 | 16 kDa protein               | 476.741646 | 951.4687  | 2         | 2         | 3.86    | 1.21  | 951.468597  | 34.3      | TDEGIAYR       |           |           |                 |                 |                   |
| 6        | 38          |             |                              | 476.741646 | 951.4687  | 2         |           |         |       | 951.468597  | 23.14     | TDEGIAYR       |           |           |                 |                 |                   |
| 6        | 38          |             |                              | 503.78283  | 1005.551  | 2         |           |         |       | 1005.55191  | 33.55     | ATAVVDGAFK     |           |           |                 |                 |                   |
| 6        | 39          | IPI00514952 | Novel protein                | 302.51     | 904.5082  | 3         | 1         | 2.44    | 0.00  | 904.505157  | 23.63     | KDMLAALK       |           |           |                 |                 |                   |
| 6        | 39          |             |                              | 763.934195 | 1525.854  | 2         |           |         |       | 1525.850388 | 40.61     | ELLDLVASHFNLK  | 763.9342  | 765.9468  | 0.78            | 0.32            | 2.44              |
| 6        | 39          | IPI00644865 | Novel protein                | 302.51     | 904.5082  | 3         | 1         | 2.44    | 0.00  | 904.505157  | 23.63     | KDMLAALK       |           |           |                 |                 |                   |
| 6        | 39          |             |                              | 763.934195 | 1525.854  | 2         |           |         |       | 1525.850388 | 40.61     | ELLDLVASHFNLK  |           |           |                 |                 |                   |
| 6        | 39          | IPI00748339 | 114 kDa protein              | 302.51     | 904.5082  | 3         | 1         | 2.44    | 0.00  | 904.505157  | 23.63     | KDMLAALK       |           |           |                 |                 |                   |
| 6        | 39          |             |                              | 763.934195 | 1525.854  | 2         |           |         |       | 1525.850388 | 40.61     | ELLDLVASHFNLK  |           |           |                 |                 |                   |
| 6        | 40          | IPI00646304 | peptidylprolyl isomerase B   | 357.719552 | 713.4246  | 2         | 2         | 4.26    | 1.37  | 713.424866  | 26.23     | HVVFGK         | 357.7196  | 359.7321  | 2.56            | 0.49            | 5.22              |
| 6        | 40          |             |                              | 357.719558 | 713.4246  | 2         |           |         |       | 713.424866  | 23.23     | HVVFGK         |           |           |                 |                 |                   |
| 6        | 40          |             |                              | 371.735244 | 741.4559  | 2         |           |         |       | 741.456177  | 25.25     | HVVFGK         |           |           |                 |                 |                   |
| 6        | 40          |             |                              | 530.298177 | 1058.582  | 2         |           |         |       | 1058.581818 | 34.04     | VLEGMEVVR      | 530.2982  | 532.3107  | 6.88            | 2.09            | 3.29              |
| 6        | 40          |             |                              | 530.298177 | 1058.582  | 2         |           |         |       | 1058.581818 | 39.55     | VLEGMEVVR      |           |           |                 |                 |                   |
| 6        | 41          | IPI00025019 | Proteasome subunit beta t    | 518.277801 | 1034.541  | 2         | 1         | 9.74    | 0.00  | 1034.542084 | 40.44     | DVFISAAER      | 518.2778  | 520.2904  | 14.7            | 1.51            | 9.74              |
| 6        | 42          | IPI00375511 | 26 kDa protein               | 523.778212 | 1045.542  | 2         | 1         | 2.68    | 0.00  | 1045.542816 | 39.51     | SLQSVAEER      | 523.7782  | 525.7908  | 2.55            | 0.95            | 2.68              |
| 6        | 42          | IPI00470528 | 60S ribosomal protein L15    | 523.778212 | 1045.542  | 2         | 1         | 2.68    | 0.00  | 1045.542816 | 39.51     | SLQSVAEER      |           |           |                 |                 |                   |
| 6        | 42          | IPI00550032 | OTTHUMP00000016039           | 523.778212 | 1045.542  | 2         | 1         | 2.68    | 0.00  | 1045.542816 | 39.51     | SLQSVAEER      |           |           |                 |                 |                   |
| 6        | 43          | IPI00027463 | Protein S100-A6              | 460.232218 | 918.4499  | 2         | 2         | 3.45    | 1.62  | 918.450516  | 31.98     | LMEDLDR        | 460.2322  | 462.2448  | 9.84            | 4.27            | 2.30              |
| 6        | 43          |             |                              | 472.26457  | 942.5146  | 2         |           |         |       | 942.515884  | 36.77     | LQDAEIAK       | 472.2646  | 474.2771  | 10.9            | 2.37            | 4.60              |
| 6        | 44          | IPI00166369 | CDNA FLJ33534 fis, clone     | 428.767258 | 855.52    | 2         | 1         | 23.28   | 0.00  | 855.52182   | 37.91     | LATWKPL        | 428.7673  | 430.7798  | 14.2            | 0.61            | 23.28             |
| 6        | 45          | IPI00013679 | Isoform DUT-M of Deoxyur     | 515.791713 | 1029.569  | 2         | 1         | 1.44    | 0.00  | 1029.566544 | 35.44     | IAQLICER       | 515.7917  | 517.8043  | 21.3            | 14.8            | 1.44              |
| 6        | 45          | IPI00375015 | Isoform DUT-N of Deoxyur     | 515.791713 | 1029.569  | 2         | 1         | 1.44    | 0.00  | 1029.566544 | 35.44     | IAQLICER       |           |           |                 |                 |                   |
| 6        | 45          | IPI00749113 | dUTP pyrophosphatase isc     | 515.791713 | 1029.569  | 2         | 1         | 1.44    | 0.00  | 1029.566544 | 35.44     | IAQLICER       |           |           |                 |                 |                   |
| 6        | 46          | IPI00019329 | Dynein light chain 1, cytopl | 477.571935 | 1429.694  | 3         | 1         | 1.47    | 0.00  | 1429.694931 | 32.15     | YNPTWHCIVGR    | 477.5719  | 478.9136  | 9.16            | 6.25            | 1.47              |
| 6        | 46          |             |                              | 477.571935 | 1429.694  | 3         |           |         |       | 1429.694931 | 30.65     | YNPTWHCIVGR    |           |           |                 |                 |                   |

| Band num | prot_hit_nu | prot_acc    | prot_desc                    | pep_exp_mz | pep_exp_n | pep_exp_z | quantific | average | stdev | pep_calc_mr | pep_score | pep_seq       | light m/z | heavy m/z | light intensity | heavy intensity | ratio light/heavy |
|----------|-------------|-------------|------------------------------|------------|-----------|-----------|-----------|---------|-------|-------------|-----------|---------------|-----------|-----------|-----------------|-----------------|-------------------|
| 6        | 46          | IPI00062037 | Dynein light chain 2, cytopl | 477.571935 | 1429.694  | 3         | 1         | 1.47    | 0.00  | 1429.694931 | 32.15     | YNPTWHCIVGR   |           |           |                 |                 |                   |
| 6        | 46          |             |                              | 477.571935 | 1429.694  | 3         |           |         |       | 1429.694931 | 30.65     | YNPTWHCIVGR   |           |           |                 |                 |                   |
| 6        | 47          | IPI00646294 | RNA pseudouridylate synt     | 429.268782 | 856.523   | 2         | 1         | 34.35   | 0.00  | 856.515472  | 35.12     | VGTVLGGQR     | 429.2688  | 431.2813  | 5.84            | 0.17            | 34.35             |
| 6        | 48          | IPI00219622 | Proteasome subunit alpha     | 462.24618  | 922.4778  | 2         | 1         | 2.21    | 0.00  | 922.478439  | 34.83     | SILYDER       | 462.2462  | 464.2587  | 4.27            | 1.93            | 2.21              |
| 6        | 49          | IPI00031691 | 60S ribosomal protein L9     | 389.235888 | 776.4572  | 2         | 1         | 4.44    | 0.00  | 776.456894  | 34.52     | GVTLGFGR      | 389.2359  | 391.2484  | 1.51            | 0.34            | 4.44              |
| 6        | 49          | IPI00719047 | Hypothetical protein         | 389.235888 | 776.4572  | 2         | 1         | 4.44    | 0.00  | 776.456894  | 34.52     | GVTLGFGR      |           |           |                 |                 |                   |
| 6        | 49          | IPI00738685 | PREDICTED: similar to rib    | 389.235888 | 776.4572  | 2         | 1         | 4.44    | 0.00  | 776.456894  | 34.52     | GVTLGFGR      |           |           |                 |                 |                   |
| 6        | 50          | IPI00026271 | 40S ribosomal protein S14    | 729.382822 | 1456.751  | 2         | 1         | 3.77    | 0.00  | 1456.743393 | 33.97     | IEDVTPIPSDSTR | 729.3828  | 731.3954  | 1.66            | 0.44            | 3.77              |
| 6        | 51          | IPI00017448 | 40S ribosomal protein S21    | 526.782976 | 1051.551  | 2         | 1         | 4.58    | 0.00  | 1051.550888 | 22.86     | TYAICGAIR     | 526.783   | 528.7955  | 4.67            | 1.02            | 4.58              |
| 6        | 51          |             |                              | 526.782976 | 1051.551  | 2         |           |         |       | 1051.550888 | 33.34     | TYAICGAIR     |           |           |                 |                 |                   |
| 6        | 51          | IPI00387084 | OTTHUMP00000031487           | 526.782976 | 1051.551  | 2         | 1         | 4.58    | 0.00  | 1051.550888 | 22.86     | TYAICGAIR     |           |           |                 |                 |                   |
| 6        | 51          |             |                              | 526.782976 | 1051.551  | 2         |           |         |       | 1051.550888 | 33.34     | TYAICGAIR     |           |           |                 |                 |                   |
| 6        | 52          | IPI00307155 | Rho-associated protein kin   | 468.263552 | 934.5126  | 2         | 1         | 10.08   | 0.00  | 934.515747  | 29.22     | MSEKQLK       | 468.2637  | 472.2888  | 11.9            | 1.18            | 10.08             |
| 6        | 52          |             |                              | 468.263688 | 934.5128  | 2         |           |         |       | 934.515747  | 33.08     | MSEKQLK       |           |           |                 |                 |                   |
| 6        | 53          | IPI00008293 | PREDICTED: similar to 40S    | 499.301133 | 996.5877  | 2         | 1         | 1.39    | 0.00  | 996.58931   | 24.68     | HVVFIAQR      | 499.3011  | 501.3137  | 1.64            | 1.18            | 1.39              |
| 6        | 53          |             |                              | 499.301133 | 996.5877  | 2         |           |         |       | 996.58931   | 32.95     | HVVFIAQR      |           |           |                 |                 |                   |
| 6        | 53          | IPI00013415 | 40S ribosomal protein S7     | 499.301133 | 996.5877  | 2         | 1         | 1.39    | 0.00  | 996.58931   | 24.68     | HVVFIAQR      |           |           |                 |                 |                   |
| 6        | 53          |             |                              | 499.301133 | 996.5877  | 2         |           |         |       | 996.58931   | 32.95     | HVVFIAQR      |           |           |                 |                 |                   |
| 6        | 53          | IPI00478287 | 22 kDa protein               | 499.301133 | 996.5877  | 2         | 1         | 1.39    | 0.00  | 996.58931   | 24.68     | HVVFIAQR      |           |           |                 |                 |                   |
| 6        | 53          |             |                              | 499.301133 | 996.5877  | 2         |           |         |       | 996.58931   | 32.95     | HVVFIAQR      |           |           |                 |                 |                   |
| 6        | 53          | IPI00783203 | Similar to 40S ribosomal pr  | 499.301133 | 996.5877  | 2         | 1         | 1.39    | 0.00  | 996.58931   | 24.68     | HVVFIAQR      |           |           |                 |                 |                   |
| 6        | 53          |             |                              | 499.301133 | 996.5877  | 2         |           |         |       | 996.58931   | 32.95     | HVVFIAQR      |           |           |                 |                 |                   |
| 6        | 54          | IPI00170796 | Isoform 1 of Vacuolar prote  | 370.221725 | 1107.643  | 3         | 1         | 2.31    | 0.00  | 1107.642471 | 32.81     | TLAGDVHIVR    | 370.2217  | 371.5634  | 1.78            | 0.77            | 2.31              |
| 6        | 54          | IPI00184284 | Isoform 2 of Vacuolar prote  | 370.221725 | 1107.643  | 3         | 1         | 2.31    | 0.00  | 1107.642471 | 32.81     | TLAGDVHIVR    |           |           |                 |                 |                   |
| 6        | 55          | IPI00290456 | Intercellular adhesion mole  | 645.319716 | 1288.625  | 2         | 1         | 6.28    | 0.00  | 1288.619354 | 32.67     | CEATNPRGSAAK  | 645.3197  | 647.3323  | 1.82            | 0.29            | 6.28              |
| 6        | 55          |             |                              | 645.319716 | 1288.625  | 2         |           |         |       | 1288.619354 | 21.23     | CEATNPRGSAAK  |           |           |                 |                 |                   |
| 6        | 55          |             |                              | 645.3205   | 1288.626  | 2         |           |         |       | 1288.619354 | 27.48     | CEATNPRGSAAK  |           |           |                 |                 |                   |
| 6        | 55          |             |                              | 645.320531 | 1288.627  | 2         |           |         |       | 1288.619354 | 28.64     | CEATNPRGSAAK  |           |           |                 |                 |                   |
| 6        | 55          | IPI00743302 | intercellular adhesion mole  | 645.319716 | 1288.625  | 2         | 1         | 6.28    | 0.00  | 1288.619354 | 32.67     | CEATNPRGSAAK  |           |           |                 |                 |                   |
| 6        | 55          |             |                              | 645.319716 | 1288.625  | 2         |           |         |       | 1288.619354 | 21.23     | CEATNPRGSAAK  |           |           |                 |                 |                   |
| 6        | 55          |             |                              | 645.3205   | 1288.626  | 2         |           |         |       | 1288.619354 | 27.48     | CEATNPRGSAAK  |           |           |                 |                 |                   |
| 6        | 55          |             |                              | 645.320531 | 1288.627  | 2         |           |         |       | 1288.619354 | 28.64     | CEATNPRGSAAK  |           |           |                 |                 |                   |
| 6        | 56          | IPI00748082 | Conserved hypothetical pro   | 390.232461 | 1167.676  | 3         |           |         |       | 1167.682236 | 32.6      | TLPVPVAKCR    |           |           |                 |                 |                   |
| 6        | 57          | IPI00005719 | RAB1A, member RAS onc        | 509.764963 | 1017.515  | 2         | 1         | 4.36    | 0.00  | 1017.515564 | 32.55     | TITSSYYR      | 509.765   | 511.7775  | 1.92            | 0.44            | 4.36              |
| 6        | 57          | IPI00008964 | Ras-related protein Rab-1E   | 509.764963 | 1017.515  | 2         | 1         | 4.36    | 0.00  | 1017.515564 | 32.55     | TITSSYYR      |           |           |                 |                 |                   |
| 6        | 57          | IPI00022134 | Putative small GTP-binding   | 509.764963 | 1017.515  | 2         | 1         | 4.36    | 0.00  | 1017.515564 | 32.55     | TITSSYYR      |           |           |                 |                 |                   |
| 6        | 57          | IPI00735546 | PREDICTED: similar to RA     | 509.764963 | 1017.515  | 2         | 1         | 4.36    | 0.00  | 1017.515564 | 32.55     | TITSSYYR      |           |           |                 |                 |                   |
| 6        | 58          | IPI00168831 | Isoform 2 of SAM domain-c    | 379.255657 | 756.4968  | 2         | 1         | 2.66    | 0.00  | 756.496979  | 32.21     | KIKANR        | 379.2557  | 381.2682  | 7.55            | 2.84            | 2.66              |
| 6        | 58          | IPI00185526 | SAM-domain protein SAM       | 379.255657 | 756.4968  | 2         | 1         | 2.66    | 0.00  | 756.496979  | 32.21     | KIKANR        |           |           |                 |                 |                   |
| 6        | 58          | IPI00339277 | Isoform 1 of SAM domain-c    | 379.255657 | 756.4968  | 2         | 1         | 2.66    | 0.00  | 756.496979  | 32.21     | KIKANR        |           |           |                 |                 |                   |
| 6        | 58          | IPI00782942 | 59 kDa protein               | 379.255657 | 756.4968  | 2         | 1         | 2.66    | 0.00  | 756.496979  | 32.21     | KIKANR        |           |           |                 |                 |                   |
| 6        | 58          | IPI00783644 | 61 kDa protein               | 379.255657 | 756.4968  | 2         | 1         | 2.66    | 0.00  | 756.496979  | 32.21     | KIKANR        |           |           |                 |                 |                   |
| 6        | 59          | IPI00020436 | Ras-related protein Rab-11   | 486.761359 | 971.5082  | 2         | 1         | 3.60    | 0.00  | 971.510071  | 24.67     | AITSAYYR      |           |           |                 |                 |                   |
| 6        | 59          |             |                              | 486.761359 | 971.5082  | 2         |           |         |       | 971.510071  | 27.16     | AITSAYYR      |           |           |                 |                 |                   |
| 6        | 59          |             |                              | 651.827965 | 1301.641  | 2         |           |         |       | 1301.638855 | 32.11     | AQIWDTAGQER   | 651.828   | 653.8405  | 1.26            | 0.35            | 3.60              |
| 6        | 59          | IPI00429190 | Ras-related protein Rab-11   | 486.761359 | 971.5082  | 2         | 1         | 3.60    | 0.00  | 971.510071  | 24.67     | AITSAYYR      |           |           |                 |                 |                   |
| 6        | 59          |             |                              | 486.761359 | 971.5082  | 2         |           |         |       | 971.510071  | 27.16     | AITSAYYR      |           |           |                 |                 |                   |
| 6        | 59          |             |                              | 651.827965 | 1301.641  | 2         |           |         |       | 1301.638855 | 32.11     | AQIWDTAGQER   |           |           |                 |                 |                   |
| 6        | 60          | IPI00176696 | PREDICTED: similar to 40S    | 485.788914 | 969.5633  | 2         | 1         | 7.93    | 0.00  | 969.563141  | 25.26     | NIVEAAAVR     | 485.7889  | 487.8015  | 3.25            | 0.41            | 7.93              |
| 6        | 60          |             |                              | 485.788914 | 969.5633  | 2         |           |         |       | 969.563141  | 31.73     | NIVEAAAVR     |           |           |                 |                 |                   |
| 6        | 60          | IPI00176854 | Ribosomal protein S26        | 485.788914 | 969.5633  | 2         | 1         | 7.93    | 0.00  | 969.563141  | 25.26     | NIVEAAAVR     |           |           |                 |                 |                   |
| 6        | 60          |             |                              | 485.788914 | 969.5633  | 2         |           |         |       | 969.563141  | 31.73     | NIVEAAAVR     |           |           |                 |                 |                   |
| 6        | 60          | IPI00186712 | OTTHUMP00000018641           | 485.788914 | 969.5633  | 2         | 1         | 7.93    | 0.00  | 969.563141  | 25.26     | NIVEAAAVR     |           |           |                 |                 |                   |
| 6        | 60          |             |                              | 485.788914 | 969.5633  | 2         |           |         |       | 969.563141  | 31.73     | NIVEAAAVR     |           |           |                 |                 |                   |
| 6        | 60          | IPI00187140 | Ribosomal protein S26-like   | 485.788914 | 969.5633  | 2         | 1         | 7.93    | 0.00  | 969.563141  | 25.26     | NIVEAAAVR     |           |           |                 |                 |                   |
| 6        | 60          |             |                              | 485.788914 | 969.5633  | 2         |           |         |       | 969.563141  | 31.73     | NIVEAAAVR     |           |           |                 |                 |                   |
| 6        | 60          | IPI00399281 | 13 kDa protein               | 485.788914 | 969.5633  | 2         | 1         | 7.93    | 0.00  | 969.563141  | 25.26     | NIVEAAAVR     |           |           |                 |                 |                   |
| 6        | 60          |             |                              | 485.788914 | 969.5633  | 2         |           |         |       | 969.563141  | 31.73     | NIVEAAAVR     |           |           |                 |                 |                   |
| 6        | 60          | IPI00401819 | Hypothetical protein RPS2    | 485.788914 | 969.5633  | 2         | 1         | 7.93    | 0.00  | 969.563141  | 25.26     | NIVEAAAVR     |           |           |                 |                 |                   |
| 6        | 60          |             |                              | 485.788914 | 969.5633  | 2         |           |         |       | 969.563141  | 31.73     | NIVEAAAVR     |           |           |                 |                 |                   |
| 6        | 60          | IPI00477550 | PREDICTED: similar to 40S    | 485.788914 | 969.5633  | 2         | 1         | 7.93    | 0.00  | 969.563141  | 25.26     | NIVEAAAVR     |           |           |                 |                 |                   |
| 6        | 60          |             |                              | 485.788914 | 969.5633  | 2         |           |         |       | 969.563141  | 31.73     | NIVEAAAVR     |           |           |                 |                 |                   |
| 6        | 60          | IPI00655650 | 40S ribosomal protein S26    | 485.788914 | 969.5633  | 2         | 1         | 7.93    | 0.00  | 969.563141  | 25.26     | NIVEAAAVR     |           |           |                 |                 |                   |

| Band num | prot_hit_nu | prot_acc    | prot_desc                    | pep_exp_mz | pep_exp_n | pep_exp_z | quantific | average | stdev | pep_calc_mr | pep_score | pep_seq           | light m/z | heavy m/z | light intensity | heavy intensity | ratio light/heavy |
|----------|-------------|-------------|------------------------------|------------|-----------|-----------|-----------|---------|-------|-------------|-----------|-------------------|-----------|-----------|-----------------|-----------------|-------------------|
| 6        | 60          |             |                              | 485.788914 | 969.5633  | 2         |           |         |       | 969.563141  | 31.73     | NIVEAAAVR         |           |           |                 |                 |                   |
| 6        | 60          | IPI00736949 | PREDICTED: similar to 40:    | 485.788914 | 969.5633  | 2         | 1         | 7.93    | 0.00  | 969.563141  | 25.26     | NIVEAAAVR         |           |           |                 |                 |                   |
| 6        | 60          |             |                              | 485.788914 | 969.5633  | 2         |           |         |       | 969.563141  | 31.73     | NIVEAAAVR         |           |           |                 |                 |                   |
| 6        | 60          | IPI00739263 | PREDICTED: similar to 40:    | 485.788914 | 969.5633  | 2         | 1         | 7.93    | 0.00  | 969.563141  | 25.26     | NIVEAAAVR         |           |           |                 |                 |                   |
| 6        | 60          |             |                              | 485.788914 | 969.5633  | 2         |           |         |       | 969.563141  | 31.73     | NIVEAAAVR         |           |           |                 |                 |                   |
| 6        | 60          | IPI00787644 | PREDICTED: similar to 40:    | 485.788914 | 969.5633  | 2         | 1         | 7.93    | 0.00  | 969.563141  | 25.26     | NIVEAAAVR         |           |           |                 |                 |                   |
| 6        | 60          |             |                              | 485.788914 | 969.5633  | 2         |           |         |       | 969.563141  | 31.73     | NIVEAAAVR         |           |           |                 |                 |                   |
| 6        | 61          | IPI00472605 | HLA class I histocompatibil  | 518.79     | 1035.565  | 2         | 1         | L       | 0.00  | 1035.562485 | 31.48     | YLENGKEK          | 518.79    | 522.8151  | 0.23            | 0               | L                 |
| 6        | 62          | IPI00166143 | Isoform 4 of Transcription f | 651.392184 | 1300.77   | 2         | 1         | 14.04   | 0.00  | 1300.760193 | 31.2      | KGSLADVVDTLK      | 651.3922  | 655.4173  | 26.4            | 1.88            | 14.04             |
| 6        | 62          |             |                              | 651.392184 | 1300.77   | 2         |           |         |       | 1300.760193 | 27.8      | KGSLADVVDTLK      |           |           |                 |                 |                   |
| 6        | 62          | IPI00171247 | Isoform 2 of Transcription f | 651.392184 | 1300.77   | 2         | 1         | 14.04   | 0.00  | 1300.760193 | 31.2      | KGSLADVVDTLK      |           |           |                 |                 |                   |
| 6        | 62          |             |                              | 651.392184 | 1300.77   | 2         |           |         |       | 1300.760193 | 27.8      | KGSLADVVDTLK      |           |           |                 |                 |                   |
| 6        | 62          | IPI00216317 | Isoform 1 of Transcription f | 651.392184 | 1300.77   | 2         | 1         | 14.04   | 0.00  | 1300.760193 | 31.2      | KGSLADVVDTLK      |           |           |                 |                 |                   |
| 6        | 62          |             |                              | 651.392184 | 1300.77   | 2         |           |         |       | 1300.760193 | 27.8      | KGSLADVVDTLK      |           |           |                 |                 |                   |
| 6        | 62          | IPI00218631 | Isoform 3 of Transcription f | 651.392184 | 1300.77   | 2         | 1         | 14.04   | 0.00  | 1300.760193 | 31.2      | KGSLADVVDTLK      |           |           |                 |                 |                   |
| 6        | 62          |             |                              | 651.392184 | 1300.77   | 2         |           |         |       | 1300.760193 | 27.8      | KGSLADVVDTLK      |           |           |                 |                 |                   |
| 6        | 62          | IPI00395930 | Hypothetical protein SOX6    | 651.392184 | 1300.77   | 2         | 1         | 14.04   | 0.00  | 1300.760193 | 31.2      | KGSLADVVDTLK      |           |           |                 |                 |                   |
| 6        | 62          |             |                              | 651.392184 | 1300.77   | 2         |           |         |       | 1300.760193 | 27.8      | KGSLADVVDTLK      |           |           |                 |                 |                   |
| 6        | 62          | IPI00412928 | Isoform 2 of Transcription f | 651.392184 | 1300.77   | 2         | 1         | 14.04   | 0.00  | 1300.760193 | 31.2      | KGSLADVVDTLK      |           |           |                 |                 |                   |
| 6        | 62          |             |                              | 651.392184 | 1300.77   | 2         |           |         |       | 1300.760193 | 27.8      | KGSLADVVDTLK      |           |           |                 |                 |                   |
| 6        | 62          | IPI00641980 | Isoform 1 of Transcription f | 651.392184 | 1300.77   | 2         | 1         | 14.04   | 0.00  | 1300.760193 | 31.2      | KGSLADVVDTLK      |           |           |                 |                 |                   |
| 6        | 62          |             |                              | 651.392184 | 1300.77   | 2         |           |         |       | 1300.760193 | 27.8      | KGSLADVVDTLK      |           |           |                 |                 |                   |
| 6        | 62          | IPI00787755 | Hypothetical protein SOX6    | 651.392184 | 1300.77   | 2         | 1         | 14.04   | 0.00  | 1300.760193 | 31.2      | KGSLADVVDTLK      |           |           |                 |                 |                   |
| 6        | 62          |             |                              | 651.392184 | 1300.77   | 2         |           |         |       | 1300.760193 | 27.8      | KGSLADVVDTLK      |           |           |                 |                 |                   |
| 6        | 63          | IPI00022314 | Superoxide dismutase [Mn     | 362.22991  | 1083.668  | 3         | 1         | 4.00    | 0.00  | 1083.667618 | 30.05     | GELLEAIKR         | 362.2299  | 364.9133  | 1.72            | 0.43            | 4.00              |
| 6        | 63          | IPI00607577 | manganese superoxide dis     | 362.22991  | 1083.668  | 3         | 1         | 4.00    | 0.00  | 1083.667618 | 30.05     | GELLEAIKR         |           |           |                 |                 |                   |
| 6        | 63          | IPI00786865 | manganese superoxide dis     | 362.22991  | 1083.668  | 3         | 1         | 4.00    | 0.00  | 1083.667618 | 30.05     | GELLEAIKR         |           |           |                 |                 |                   |
| 7        | 1           | IPI00219018 | Glyceraldehyde-3-phospha     | 412.227639 | 822.4407  | 2         | 2         | 3.67    | 0.37  | 822.444626  | 27.23     | LTGMAFR           |           |           |                 |                 |                   |
| 7        | 1           |             |                              | 412.227641 | 822.4407  | 2         |           |         |       | 822.444626  | 27.9      | LTGMAFR           |           |           |                 |                 |                   |
| 7        | 1           |             |                              | 417.234481 | 832.4544  | 2         |           |         |       | 832.457932  | 25.82     | VGVNGFGR          |           |           |                 |                 |                   |
| 7        | 1           |             |                              | 417.234481 | 832.4544  | 2         |           |         |       | 832.457932  | 36.17     | VGVNGFGR          |           |           |                 |                 |                   |
| 7        | 1           |             |                              | 443.255983 | 884.4974  | 2         |           |         |       | 884.499176  | 25.16     | QASEGPLK          |           |           |                 |                 |                   |
| 7        | 1           |             |                              | 463.288365 | 924.5622  | 2         |           |         |       | 924.566849  | 20.43     | VIPELNGK          |           |           |                 |                 |                   |
| 7        | 1           |             |                              | 410.550479 | 1228.63   | 3         |           |         |       | 1228.633224 | 61.43     | VVDLMAHMASK       |           |           |                 |                 |                   |
| 7        | 1           |             |                              | 419.894136 | 1256.661  | 3         |           |         |       | 1256.664536 | 89.05     | VVDLMAHMASK       |           |           |                 |                 |                   |
| 7        | 1           |             |                              | 419.894136 | 1256.661  | 3         |           |         |       | 1256.664536 | 64.99     | VVDLMAHMASK       |           |           |                 |                 |                   |
| 7        | 1           |             |                              | 631.320219 | 1260.626  | 2         |           |         |       | 1260.623062 | 21.57     | VVDLMAHMASK       |           |           |                 |                 |                   |
| 7        | 1           |             |                              | 720.414311 | 1438.814  | 2         |           |         |       | 1438.816788 | 76.45     | GALQNIIPASTGAAK   |           |           |                 |                 |                   |
| 7        | 1           |             |                              | 720.414311 | 1438.814  | 2         |           |         |       | 1438.816788 | 73.64     | GALQNIIPASTGAAK   |           |           |                 |                 |                   |
| 7        | 1           |             |                              | 720.414311 | 1438.814  | 2         |           |         |       | 1438.816788 | 83.65     | GALQNIIPASTGAAK   |           |           |                 |                 |                   |
| 7        | 1           |             |                              | 734.431034 | 1466.848  | 2         |           |         |       | 1466.848099 | 72.62     | GALQNIIPASTGAAK   |           |           |                 |                 |                   |
| 7        | 1           |             |                              | 734.431034 | 1466.848  | 2         |           |         |       | 1466.848099 | 83.45     | GALQNIIPASTGAAK   |           |           |                 |                 |                   |
| 7        | 1           |             |                              | 734.431034 | 1466.848  | 2         |           |         |       | 1466.848099 | 67.32     | GALQNIIPASTGAAK   |           |           |                 |                 |                   |
| 7        | 1           |             |                              | 734.431034 | 1466.848  | 2         |           |         |       | 1466.848099 | 70.33     | GALQNIIPASTGAAK   |           |           |                 |                 |                   |
| 7        | 1           |             |                              | 520.279807 | 1557.818  | 3         |           |         |       | 1557.820908 | 33.07     | VPTANVSVVDLTCR    |           |           |                 |                 |                   |
| 7        | 1           |             |                              | 520.279807 | 1557.818  | 3         |           |         |       | 1557.820908 | 27.5      | VPTANVSVVDLTCR    |           |           |                 |                 |                   |
| 7        | 1           |             |                              | 779.918364 | 1557.822  | 2         |           |         |       | 1557.820908 | 95.92     | VPTANVSVVDLTCR    |           |           |                 |                 |                   |
| 7        | 1           |             |                              | 779.918384 | 1557.822  | 2         |           |         |       | 1557.820908 | 111.95    | VPTANVSVVDLTCR    |           |           |                 |                 |                   |
| 7        | 1           |             |                              | 779.918384 | 1557.822  | 2         |           |         |       | 1557.820908 | 101.67    | VPTANVSVVDLTCR    |           |           |                 |                 |                   |
| 7        | 1           |             |                              | 547.982228 | 1640.925  | 3         |           |         |       | 1640.927399 | 20.2      | LVINGNPITIFQER    |           |           |                 |                 |                   |
| 7        | 1           |             |                              | 547.982244 | 1640.925  | 3         |           |         |       | 1640.927399 | 21.93     | LVINGNPITIFQER    |           |           |                 |                 |                   |
| 7        | 1           |             |                              | 597.951732 | 1790.833  | 3         |           |         |       | 1790.828812 | 38.61     | LISWYDNEFGYSNR    |           |           |                 |                 |                   |
| 7        | 1           |             |                              | 896.425027 | 1790.836  | 2         |           |         |       | 1790.828812 | 105.71    | LISWYDNEFGYSNR    |           |           |                 |                 |                   |
| 7        | 1           |             |                              | 896.425027 | 1790.836  | 2         |           |         |       | 1790.828812 | 87.33     | LISWYDNEFGYSNR    |           |           |                 |                 |                   |
| 7        | 1           |             |                              | 896.42537  | 1790.836  | 2         |           |         |       | 1790.828812 | 92.61     | LISWYDNEFGYSNR    |           |           |                 |                 |                   |
| 7        | 1           |             |                              | 896.425421 | 1790.836  | 2         |           |         |       | 1790.828812 | 103.63    | LISWYDNEFGYSNR    |           |           |                 |                 |                   |
| 7        | 1           |             |                              | 896.425421 | 1790.836  | 2         |           |         |       | 1790.828812 | 88.71     | LISWYDNEFGYSNR    |           |           |                 |                 |                   |
| 7        | 1           |             |                              | 896.425421 | 1790.836  | 2         |           |         |       | 1790.828812 | 99.41     | LISWYDNEFGYSNR    |           |           |                 |                 |                   |
| 7        | 1           |             |                              | 931.481069 | 1860.948  | 2         |           |         |       | 1860.946198 | 91.11     | IISNASCTTNCLAPLAK | 931.4811  | 933.4936  | 19              | 5.57            | 3.41              |
| 7        | 1           |             |                              | 931.481069 | 1860.948  | 2         |           |         |       | 1860.946198 | 115.77    | IISNASCTTNCLAPLAK |           |           |                 |                 |                   |
| 7        | 1           |             |                              | 931.481069 | 1860.948  | 2         |           |         |       | 1860.946198 | 111.24    | IISNASCTTNCLAPLAK |           |           |                 |                 |                   |
| 7        | 1           |             |                              | 931.481069 | 1860.948  | 2         |           |         |       | 1860.946198 | 128.66    | IISNASCTTNCLAPLAK |           |           |                 |                 |                   |
| 7        | 1           |             |                              | 945.496551 | 1888.979  | 2         |           |         |       | 1888.977509 | 127.9     | IISNASCTTNCLAPLAK |           |           |                 |                 |                   |



| Band num | prot_hit_nu | prot_acc    | prot_desc            | pep_exp_mz | pep_exp_n | pep_exp_z | quantific | average | stdev | pep_calc_mr | pep_score | pep_seq                 | light m/z | heavy m/z | light intensity | heavy intensity | ratio light/heavy |
|----------|-------------|-------------|----------------------|------------|-----------|-----------|-----------|---------|-------|-------------|-----------|-------------------------|-----------|-----------|-----------------|-----------------|-------------------|
| 7        | 1           |             |                      | 945.496551 | 1888.979  | 2         |           |         |       | 1888.977509 | 126.09    | IISNASCTTINCLAPLAK      |           |           |                 |                 |                   |
| 7        | 1           |             |                      | 945.496586 | 1888.979  | 2         |           |         |       | 1888.977509 | 95.24     | IISNASCTTINCLAPLAK      |           |           |                 |                 |                   |
| 7        | 1           |             |                      | 945.496586 | 1888.979  | 2         |           |         |       | 1888.977509 | 104.46    | IISNASCTTINCLAPLAK      |           |           |                 |                 |                   |
| 7        | 1           |             |                      | 630.66716  | 1888.98   | 3         |           |         |       | 1888.977509 | 20.75     | IISNASCTTINCLAPLAK      |           |           |                 |                 |                   |
| 7        | 1           |             |                      | 747.721488 | 2240.143  | 3         |           |         |       | 2240.135727 | 72.8      | VIISAPSADAPMFVMGVNHEK   | 747.7216  | 749.0633  | 24              | 6.1             | 3.93              |
| 7        | 1           |             |                      | 747.721488 | 2240.143  | 3         |           |         |       | 2240.135727 | 73.68     | VIISAPSADAPMFVMGVNHEK   |           |           |                 |                 |                   |
| 7        | 1           |             |                      | 747.721629 | 2240.143  | 3         |           |         |       | 2240.135727 | 79.37     | VIISAPSADAPMFVMGVNHEK   |           |           |                 |                 |                   |
| 7        | 1           |             |                      | 747.721629 | 2240.143  | 3         |           |         |       | 2240.135727 | 107.42    | VIISAPSADAPMFVMGVNHEK   |           |           |                 |                 |                   |
| 7        | 1           |             |                      | 757.065414 | 2268.174  | 3         |           |         |       | 2268.167038 | 79.71     | VIISAPSADAPMFVMGVNHEK   |           |           |                 |                 |                   |
| 7        | 1           |             |                      | 757.065457 | 2268.175  | 3         |           |         |       | 2268.167038 | 67.69     | VIISAPSADAPMFVMGVNHEK   |           |           |                 |                 |                   |
| 7        | 1           |             |                      | 757.065457 | 2268.175  | 3         |           |         |       | 2268.167038 | 65.63     | VIISAPSADAPMFVMGVNHEK   |           |           |                 |                 |                   |
| 7        | 1           |             |                      | 757.06553  | 2268.175  | 3         |           |         |       | 2268.167038 | 94.14     | VIISAPSADAPMFVMGVNHEK   |           |           |                 |                 |                   |
| 7        | 1           |             |                      | 762.395043 | 2284.163  | 3         |           |         |       | 2284.161957 | 30.75     | VIISAPSADAPMFVMGVNHEK   |           |           |                 |                 |                   |
| 7        | 1           |             |                      | 762.395043 | 2284.163  | 3         |           |         |       | 2284.161957 | 41.88     | VIISAPSADAPMFVMGVNHEK   |           |           |                 |                 |                   |
| 7        | 1           |             |                      | 762.395077 | 2284.163  | 3         |           |         |       | 2284.161957 | 40.61     | VIISAPSADAPMFVMGVNHEK   |           |           |                 |                 |                   |
| 7        | 1           |             |                      | 762.395077 | 2284.163  | 3         |           |         |       | 2284.161957 | 50.57     | VIISAPSADAPMFVMGVNHEK   |           |           |                 |                 |                   |
| 7        | 1           |             |                      | 875.135142 | 2622.384  | 3         |           |         |       | 2622.386353 | 37.77     | VIHDNFGIVEGLMTTVHAIATQK |           |           |                 |                 |                   |
| 7        | 1           |             |                      | 656.606033 | 2622.395  | 4         |           |         |       | 2622.386353 | 35.5      | VIHDNFGIVEGLMTTVHAIATQK |           |           |                 |                 |                   |
| 7        | 1           |             |                      | 656.606033 | 2622.395  | 4         |           |         |       | 2622.386353 | 33.91     | VIHDNFGIVEGLMTTVHAIATQK |           |           |                 |                 |                   |
| 7        | 1           |             |                      | 880.467841 | 2638.382  | 3         |           |         |       | 2638.381271 | 42.4      | VIHDNFGIVEGLMTTVHAIATQK |           |           |                 |                 |                   |
| 7        | 1           |             |                      | 880.467841 | 2638.382  | 3         |           |         |       | 2638.381271 | 52.75     | VIHDNFGIVEGLMTTVHAIATQK |           |           |                 |                 |                   |
| 7        | 1           |             |                      | 660.603263 | 2638.384  | 4         |           |         |       | 2638.381271 | 29.1      | VIHDNFGIVEGLMTTVHAIATQK |           |           |                 |                 |                   |
| 7        | 1           |             |                      | 660.603268 | 2638.384  | 4         |           |         |       | 2638.381271 | 32.31     | VIHDNFGIVEGLMTTVHAIATQK |           |           |                 |                 |                   |
| 7        | 1           |             |                      | 663.613215 | 2650.424  | 4         |           |         |       | 2650.417664 | 47.44     | VIHDNFGIVEGLMTTVHAIATQK |           |           |                 |                 |                   |
| 7        | 1           |             |                      | 663.613215 | 2650.424  | 4         |           |         |       | 2650.417664 | 32.09     | VIHDNFGIVEGLMTTVHAIATQK |           |           |                 |                 |                   |
| 7        | 1           |             |                      | 663.613637 | 2650.425  | 4         |           |         |       | 2650.417664 | 51.78     | VIHDNFGIVEGLMTTVHAIATQK |           |           |                 |                 |                   |
| 7        | 1           |             |                      | 663.613637 | 2650.425  | 4         |           |         |       | 2650.417664 | 47.32     | VIHDNFGIVEGLMTTVHAIATQK |           |           |                 |                 |                   |
| 7        | 1           |             |                      | 667.610086 | 2666.411  | 4         |           |         |       | 2666.412582 | 32.36     | VIHDNFGIVEGLMTTVHAIATQK |           |           |                 |                 |                   |
| 7        | 2           | IPI00418169 | annexin A2 isoform 1 | 439.237603 | 876.4607  | 2         | 2         | 3.22    | 0.18  | 876.465103  | 32.02     | SEVDMLK                 |           |           |                 |                 |                   |
| 7        | 2           |             |                      | 532.282937 | 1062.551  | 2         |           |         |       | 1062.555649 | 26.72     | WISIMTER                |           |           |                 |                 |                   |
| 7        | 2           |             |                      | 532.282937 | 1062.551  | 2         |           |         |       | 1062.555649 | 24.63     | WISIMTER                |           |           |                 |                 |                   |
| 7        | 2           |             |                      | 557.761084 | 1113.508  | 2         |           |         |       | 1113.51152  | 43.46     | AYTNFDAER               |           |           |                 |                 |                   |
| 7        | 2           |             |                      | 557.761084 | 1113.508  | 2         |           |         |       | 1113.51152  | 48.7      | AYTNFDAER               |           |           |                 |                 |                   |
| 7        | 2           |             |                      | 557.761134 | 1113.508  | 2         |           |         |       | 1113.51152  | 47.36     | AYTNFDAER               |           |           |                 |                 |                   |
| 7        | 2           |             |                      | 570.294552 | 1138.575  | 2         |           |         |       | 1138.579544 | 42.32     | QDI AFAYQR              |           |           |                 |                 |                   |
| 7        | 2           |             |                      | 570.294552 | 1138.575  | 2         |           |         |       | 1138.579544 | 39.43     | QDI AFAYQR              |           |           |                 |                 |                   |
| 7        | 2           |             |                      | 572.333819 | 1142.653  | 2         |           |         |       | 1142.657135 | 64.35     | DALNIETAIK              |           |           |                 |                 |                   |
| 7        | 2           |             |                      | 572.333819 | 1142.653  | 2         |           |         |       | 1142.657135 | 64.97     | DALNIETAIK              |           |           |                 |                 |                   |
| 7        | 2           |             |                      | 625.816423 | 1249.618  | 2         |           |         |       | 1249.621475 | 47.62     | TPAQYDASELK             |           |           |                 |                 |                   |
| 7        | 2           |             |                      | 625.816423 | 1249.618  | 2         |           |         |       | 1249.621475 | 37.14     | TPAQYDASELK             |           |           |                 |                 |                   |
| 7        | 2           |             |                      | 625.816423 | 1249.618  | 2         |           |         |       | 1249.621475 | 48.66     | TPAQYDASELK             |           |           |                 |                 |                   |
| 7        | 2           |             |                      | 636.831269 | 1271.648  | 2         |           |         |       | 1271.649414 | 60.86     | TNQLQEINR               |           |           |                 |                 |                   |
| 7        | 2           |             |                      | 636.831269 | 1271.648  | 2         |           |         |       | 1271.649414 | 44.83     | TNQLQEINR               |           |           |                 |                 |                   |
| 7        | 2           |             |                      | 636.831269 | 1271.648  | 2         |           |         |       | 1271.649414 | 61.82     | TNQLQEINR               |           |           |                 |                 |                   |
| 7        | 2           |             |                      | 639.832419 | 1277.65   | 2         |           |         |       | 1277.652786 | 49.95     | TPAQYDASELK             |           |           |                 |                 |                   |
| 7        | 2           |             |                      | 639.832419 | 1277.65   | 2         |           |         |       | 1277.652786 | 57.7      | TPAQYDASELK             |           |           |                 |                 |                   |
| 7        | 2           |             |                      | 639.832419 | 1277.65   | 2         |           |         |       | 1277.652786 | 51.05     | TPAQYDASELK             |           |           |                 |                 |                   |
| 7        | 2           |             |                      | 725.366705 | 1448.719  | 2         |           |         |       | 1448.721191 | 73.82     | SLYYYIQQDTK             |           |           |                 |                 |                   |
| 7        | 2           |             |                      | 725.366705 | 1448.719  | 2         |           |         |       | 1448.721191 | 58.5      | SLYYYIQQDTK             |           |           |                 |                 |                   |
| 7        | 2           |             |                      | 739.38279  | 1476.751  | 2         |           |         |       | 1476.752502 | 76.68     | SLYYYIQQDTK             |           |           |                 |                 |                   |
| 7        | 2           |             |                      | 739.38279  | 1476.751  | 2         |           |         |       | 1476.752502 | 68.46     | SLYYYIQQDTK             |           |           |                 |                 |                   |
| 7        | 2           |             |                      | 739.382941 | 1476.751  | 2         |           |         |       | 1476.752502 | 76.49     | SLYYYIQQDTK             |           |           |                 |                 |                   |
| 7        | 2           |             |                      | 752.85509  | 1503.696  | 2         |           |         |       | 1503.693985 | 40.62     | SYSPYDMLESIR            |           |           |                 |                 |                   |
| 7        | 2           |             |                      | 752.85509  | 1503.696  | 2         |           |         |       | 1503.693985 | 40.92     | SYSPYDMLESIR            |           |           |                 |                 |                   |
| 7        | 2           |             |                      | 752.85509  | 1503.696  | 2         |           |         |       | 1503.693985 | 40.86     | SYSPYDMLESIR            |           |           |                 |                 |                   |
| 7        | 2           |             |                      | 785.943985 | 1569.873  | 2         |           |         |       | 1569.875031 | 103.71    | GVDEVTIVNILTNR          | 785.944   | 787.9565  | 36.8            | 11.9            | 3.09              |
| 7        | 2           |             |                      | 785.943985 | 1569.873  | 2         |           |         |       | 1569.875031 | 117.54    | GVDEVTIVNILTNR          |           |           |                 |                 |                   |
| 7        | 2           |             |                      | 785.943985 | 1569.873  | 2         |           |         |       | 1569.875031 | 109.07    | GVDEVTIVNILTNR          |           |           |                 |                 |                   |
| 7        | 2           |             |                      | 560.341223 | 1678.002  | 3         |           |         |       | 1678.00531  | 55.98     | SALSGHLETVILGLLK        |           |           |                 |                 |                   |
| 7        | 2           |             |                      | 560.341223 | 1678.002  | 3         |           |         |       | 1678.00531  | 76.79     | SALSGHLETVILGLLK        |           |           |                 |                 |                   |
| 7        | 2           |             |                      | 560.341223 | 1678.002  | 3         |           |         |       | 1678.00531  | 55.77     | SALSGHLETVILGLLK        |           |           |                 |                 |                   |
| 7        | 2           |             |                      | 840.011172 | 1678.008  | 2         |           |         |       | 1678.00531  | 57.62     | SALSGHLETVILGLLK        |           |           |                 |                 |                   |
| 7        | 2           |             |                      | 854.024763 | 1706.035  | 2         |           |         |       | 1706.036621 | 78.55     | SALSGHLETVILGLLK        |           |           |                 |                 |                   |

| Band num | prot_hit_nu | prot_acc    | prot_desc  | pep_exp_mz | pep_exp_n | pep_exp_z | quantific | average | stdev | pep_calc_mr | pep_score | pep_seq            | light m/z | heavy m/z | light intensity | heavy intensity | ratio light/heavy |
|----------|-------------|-------------|------------|------------|-----------|-----------|-----------|---------|-------|-------------|-----------|--------------------|-----------|-----------|-----------------|-----------------|-------------------|
| 7        | 2           |             |            | 854.024763 | 1706.035  | 2         |           |         |       | 1706.036621 | 73.58     | SALSGHLETVILGLLK   |           |           |                 |                 |                   |
| 7        | 2           |             |            | 854.024763 | 1706.035  | 2         |           |         |       | 1706.036621 | 51.29     | SALSGHLETVILGLLK   |           |           |                 |                 |                   |
| 7        | 2           |             |            | 569.685613 | 1706.035  | 3         |           |         |       | 1706.036621 | 59.19     | SALSGHLETVILGLLK   |           |           |                 |                 |                   |
| 7        | 2           |             |            | 569.685613 | 1706.035  | 3         |           |         |       | 1706.036621 | 61.34     | SALSGHLETVILGLLK   |           |           |                 |                 |                   |
| 7        | 2           |             |            | 569.685613 | 1706.035  | 3         |           |         |       | 1706.036621 | 53.19     | SALSGHLETVILGLLK   |           |           |                 |                 |                   |
| 7        | 2           |             |            | 569.687269 | 1706.04   | 3         |           |         |       | 1706.036621 | 60.58     | SALSGHLETVILGLLK   |           |           |                 |                 |                   |
| 7        | 2           |             |            | 602.636744 | 1804.888  | 3         |           |         |       | 1804.890106 | 36.05     | GLGTDEDSLIEIICSR   |           |           |                 |                 |                   |
| 7        | 2           |             |            | 602.636744 | 1804.888  | 3         |           |         |       | 1804.890106 | 32.3      | GLGTDEDSLIEIICSR   |           |           |                 |                 |                   |
| 7        | 2           |             |            | 903.453228 | 1804.892  | 2         |           |         |       | 1804.890106 | 141.91    | GLGTDEDSLIEIICSR   |           |           |                 |                 |                   |
| 7        | 2           |             |            | 903.453244 | 1804.892  | 2         |           |         |       | 1804.890106 | 136.83    | GLGTDEDSLIEIICSR   |           |           |                 |                 |                   |
| 7        | 2           |             |            | 903.453244 | 1804.892  | 2         |           |         |       | 1804.890106 | 151.1     | GLGTDEDSLIEIICSR   |           |           |                 |                 |                   |
| 7        | 2           |             |            | 903.453244 | 1804.892  | 2         |           |         |       | 1804.890106 | 150.98    | GLGTDEDSLIEIICSR   |           |           |                 |                 |                   |
| 7        | 2           |             |            | 936.970473 | 1871.926  | 2         |           |         |       | 1871.928925 | 38.7      | LSLEGDHSTPPSAYGSVK |           |           |                 |                 |                   |
| 7        | 2           |             |            | 936.970473 | 1871.926  | 2         |           |         |       | 1871.928925 | 49.19     | LSLEGDHSTPPSAYGSVK |           |           |                 |                 |                   |
| 7        | 2           |             |            | 634.326011 | 1899.956  | 3         |           |         |       | 1899.960236 | 61.86     | LSLEGDHSTPPSAYGSVK |           |           |                 |                 |                   |
| 7        | 2           |             |            | 634.326011 | 1899.956  | 3         |           |         |       | 1899.960236 | 37.23     | LSLEGDHSTPPSAYGSVK |           |           |                 |                 |                   |
| 7        | 2           |             |            | 634.326011 | 1899.956  | 3         |           |         |       | 1899.960236 | 42.16     | LSLEGDHSTPPSAYGSVK |           |           |                 |                 |                   |
| 7        | 2           |             |            | 950.987461 | 1899.96   | 2         |           |         |       | 1899.960236 | 66.38     | LSLEGDHSTPPSAYGSVK |           |           |                 |                 |                   |
| 7        | 2           |             |            | 950.987461 | 1899.96   | 2         |           |         |       | 1899.960236 | 40.85     | LSLEGDHSTPPSAYGSVK |           |           |                 |                 |                   |
| 7        | 2           |             |            | 968.964191 | 1935.914  | 2         |           |         |       | 1935.908585 | 128.82    | AEDGSVIDYELIDQDAR  | 968.9442  | 970.9768  | 8.29            | 2.48            | 3.34              |
| 7        | 2           |             |            | 968.964191 | 1935.914  | 2         |           |         |       | 1935.908585 | 128.29    | AEDGSVIDYELIDQDAR  |           |           |                 |                 |                   |
| 7        | 2           |             |            | 968.964191 | 1935.914  | 2         |           |         |       | 1935.908585 | 129.84    | AEDGSVIDYELIDQDAR  |           |           |                 |                 |                   |
| 7        | 2           |             |            | 698.343861 | 2092.01   | 3         |           |         |       | 2092.009689 | 54.35     | RAEDGSVIDYELIDQDAR |           |           |                 |                 |                   |
| 7        | 2           |             |            | 698.343861 | 2092.01   | 3         |           |         |       | 2092.009689 | 34.67     | RAEDGSVIDYELIDQDAR |           |           |                 |                 |                   |
| 7        | 2           |             |            | 698.343861 | 2092.01   | 3         |           |         |       | 2092.009689 | 57.99     | RAEDGSVIDYELIDQDAR |           |           |                 |                 |                   |
| 7        | 2           |             |            | 1047.01252 | 2092.01   | 2         |           |         |       | 2092.009689 | 67.84     | RAEDGSVIDYELIDQDAR |           |           |                 |                 |                   |
| 7        | 2           |             |            | 1047.01252 | 2092.01   | 2         |           |         |       | 2092.009689 | 73.09     | RAEDGSVIDYELIDQDAR |           |           |                 |                 |                   |
| 7        | 2           |             |            | 1047.01252 | 2092.01   | 2         |           |         |       | 2092.009689 | 80.18     | RAEDGSVIDYELIDQDAR |           |           |                 |                 |                   |
| 7        | 2           |             |            | 1047.01252 | 2092.01   | 2         |           |         |       | 2092.009689 | 80.04     | RAEDGSVIDYELIDQDAR |           |           |                 |                 |                   |
| 7        | 2           | IPI00455315 | Annexin A2 | 439.237603 | 876.4607  | 2         | 2         | 3.22    | 0.18  | 876.465103  | 32.02     | SEVDMLK            |           |           |                 |                 |                   |
| 7        | 2           |             |            | 532.282937 | 1062.551  | 2         |           |         |       | 1062.555649 | 26.72     | WISIMTER           |           |           |                 |                 |                   |
| 7        | 2           |             |            | 532.282937 | 1062.551  | 2         |           |         |       | 1062.555649 | 24.63     | WISIMTER           |           |           |                 |                 |                   |
| 7        | 2           |             |            | 557.761084 | 1113.508  | 2         |           |         |       | 1113.51152  | 43.46     | AYTNFDAER          |           |           |                 |                 |                   |
| 7        | 2           |             |            | 557.761084 | 1113.508  | 2         |           |         |       | 1113.51152  | 48.7      | AYTNFDAER          |           |           |                 |                 |                   |
| 7        | 2           |             |            | 557.761134 | 1113.508  | 2         |           |         |       | 1113.51152  | 47.36     | AYTNFDAER          |           |           |                 |                 |                   |
| 7        | 2           |             |            | 570.294552 | 1138.575  | 2         |           |         |       | 1138.579544 | 42.32     | QDIAFAYQR          |           |           |                 |                 |                   |
| 7        | 2           |             |            | 570.294552 | 1138.575  | 2         |           |         |       | 1138.579544 | 39.43     | QDIAFAYQR          |           |           |                 |                 |                   |
| 7        | 2           |             |            | 572.333819 | 1142.653  | 2         |           |         |       | 1142.657135 | 64.35     | DALNIETAIK         |           |           |                 |                 |                   |
| 7        | 2           |             |            | 572.333819 | 1142.653  | 2         |           |         |       | 1142.657135 | 64.97     | DALNIETAIK         |           |           |                 |                 |                   |
| 7        | 2           |             |            | 625.816423 | 1249.618  | 2         |           |         |       | 1249.621475 | 47.62     | TPAQYDASELK        |           |           |                 |                 |                   |
| 7        | 2           |             |            | 625.816423 | 1249.618  | 2         |           |         |       | 1249.621475 | 37.14     | TPAQYDASELK        |           |           |                 |                 |                   |
| 7        | 2           |             |            | 625.816423 | 1249.618  | 2         |           |         |       | 1249.621475 | 48.66     | TPAQYDASELK        |           |           |                 |                 |                   |
| 7        | 2           |             |            | 636.831269 | 1271.648  | 2         |           |         |       | 1271.649414 | 60.86     | TNQLQEINR          |           |           |                 |                 |                   |
| 7        | 2           |             |            | 636.831269 | 1271.648  | 2         |           |         |       | 1271.649414 | 44.83     | TNQLQEINR          |           |           |                 |                 |                   |
| 7        | 2           |             |            | 636.831269 | 1271.648  | 2         |           |         |       | 1271.649414 | 61.82     | TNQLQEINR          |           |           |                 |                 |                   |
| 7        | 2           |             |            | 639.832419 | 1277.65   | 2         |           |         |       | 1277.652786 | 49.95     | TPAQYDASELK        |           |           |                 |                 |                   |
| 7        | 2           |             |            | 639.832419 | 1277.65   | 2         |           |         |       | 1277.652786 | 52.7      | TPAQYDASELK        |           |           |                 |                 |                   |
| 7        | 2           |             |            | 639.832419 | 1277.65   | 2         |           |         |       | 1277.652786 | 51.05     | TPAQYDASELK        |           |           |                 |                 |                   |
| 7        | 2           |             |            | 725.366705 | 1448.719  | 2         |           |         |       | 1448.721191 | 73.82     | SLYYYIQQDTK        |           |           |                 |                 |                   |
| 7        | 2           |             |            | 725.366705 | 1448.719  | 2         |           |         |       | 1448.721191 | 58.5      | SLYYYIQQDTK        |           |           |                 |                 |                   |
| 7        | 2           |             |            | 739.38279  | 1476.751  | 2         |           |         |       | 1476.752502 | 76.68     | SLYYYIQQDTK        |           |           |                 |                 |                   |
| 7        | 2           |             |            | 739.38279  | 1476.751  | 2         |           |         |       | 1476.752502 | 68.46     | SLYYYIQQDTK        |           |           |                 |                 |                   |
| 7        | 2           |             |            | 739.382941 | 1476.751  | 2         |           |         |       | 1476.752502 | 76.49     | SLYYYIQQDTK        |           |           |                 |                 |                   |
| 7        | 2           |             |            | 752.85509  | 1503.696  | 2         |           |         |       | 1503.693985 | 40.62     | SYPYDMLIESIR       |           |           |                 |                 |                   |
| 7        | 2           |             |            | 752.85509  | 1503.696  | 2         |           |         |       | 1503.693985 | 40.92     | SYPYDMLIESIR       |           |           |                 |                 |                   |
| 7        | 2           |             |            | 752.85509  | 1503.696  | 2         |           |         |       | 1503.693985 | 40.86     | SYPYDMLIESIR       |           |           |                 |                 |                   |
| 7        | 2           |             |            | 785.943985 | 1569.873  | 2         |           |         |       | 1569.875031 | 103.71    | GVDEVTIVNILTNR     |           |           |                 |                 |                   |
| 7        | 2           |             |            | 785.943985 | 1569.873  | 2         |           |         |       | 1569.875031 | 117.54    | GVDEVTIVNILTNR     |           |           |                 |                 |                   |
| 7        | 2           |             |            | 785.943985 | 1569.873  | 2         |           |         |       | 1569.875031 | 109.07    | GVDEVTIVNILTNR     |           |           |                 |                 |                   |
| 7        | 2           |             |            | 560.341223 | 1678.002  | 3         |           |         |       | 1678.00531  | 55.98     | SALSGHLETVILGLLK   |           |           |                 |                 |                   |
| 7        | 2           |             |            | 560.341223 | 1678.002  | 3         |           |         |       | 1678.00531  | 76.79     | SALSGHLETVILGLLK   |           |           |                 |                 |                   |
| 7        | 2           |             |            | 560.341223 | 1678.002  | 3         |           |         |       | 1678.00531  | 55.77     | SALSGHLETVILGLLK   |           |           |                 |                 |                   |
| 7        | 2           |             |            | 840.011172 | 1678.008  | 2         |           |         |       | 1678.00531  | 57.62     | SALSGHLETVILGLLK   |           |           |                 |                 |                   |

| Band num | prot_hit_nu | prot_acc    | prot_desc            | pep_exp_mz | pep_exp_n | pep_exp_z | quantific | average | stdev | pep_calc_mr | pep_score | pep_seq            | light m/z | heavy m/z | light intensity | heavy intensity | ratio light/heavy |
|----------|-------------|-------------|----------------------|------------|-----------|-----------|-----------|---------|-------|-------------|-----------|--------------------|-----------|-----------|-----------------|-----------------|-------------------|
| 7        | 2           |             |                      | 854.024763 | 1706.035  | 2         |           |         |       | 1706.036621 | 78.55     | SALSGHLETVILGLLK   |           |           |                 |                 |                   |
| 7        | 2           |             |                      | 854.024763 | 1706.035  | 2         |           |         |       | 1706.036621 | 73.58     | SALSGHLETVILGLLK   |           |           |                 |                 |                   |
| 7        | 2           |             |                      | 854.024763 | 1706.035  | 2         |           |         |       | 1706.036621 | 51.29     | SALSGHLETVILGLLK   |           |           |                 |                 |                   |
| 7        | 2           |             |                      | 569.685613 | 1706.035  | 3         |           |         |       | 1706.036621 | 59.19     | SALSGHLETVILGLLK   |           |           |                 |                 |                   |
| 7        | 2           |             |                      | 569.685613 | 1706.035  | 3         |           |         |       | 1706.036621 | 61.34     | SALSGHLETVILGLLK   |           |           |                 |                 |                   |
| 7        | 2           |             |                      | 569.685613 | 1706.035  | 3         |           |         |       | 1706.036621 | 53.19     | SALSGHLETVILGLLK   |           |           |                 |                 |                   |
| 7        | 2           |             |                      | 569.687269 | 1706.04   | 3         |           |         |       | 1706.036621 | 60.58     | SALSGHLETVILGLLK   |           |           |                 |                 |                   |
| 7        | 2           |             |                      | 602.636744 | 1804.888  | 3         |           |         |       | 1804.890106 | 36.05     | GLGTDEDSLIEIICSR   |           |           |                 |                 |                   |
| 7        | 2           |             |                      | 602.636744 | 1804.888  | 3         |           |         |       | 1804.890106 | 32.3      | GLGTDEDSLIEIICSR   |           |           |                 |                 |                   |
| 7        | 2           |             |                      | 903.453228 | 1804.892  | 2         |           |         |       | 1804.890106 | 141.91    | GLGTDEDSLIEIICSR   |           |           |                 |                 |                   |
| 7        | 2           |             |                      | 903.453244 | 1804.892  | 2         |           |         |       | 1804.890106 | 136.83    | GLGTDEDSLIEIICSR   |           |           |                 |                 |                   |
| 7        | 2           |             |                      | 903.453244 | 1804.892  | 2         |           |         |       | 1804.890106 | 151.1     | GLGTDEDSLIEIICSR   |           |           |                 |                 |                   |
| 7        | 2           |             |                      | 903.453244 | 1804.892  | 2         |           |         |       | 1804.890106 | 150.98    | GLGTDEDSLIEIICSR   |           |           |                 |                 |                   |
| 7        | 2           |             |                      | 936.970473 | 1871.926  | 2         |           |         |       | 1871.928925 | 38.7      | LSLEGDHSTPPSAYGSVK |           |           |                 |                 |                   |
| 7        | 2           |             |                      | 936.970473 | 1871.926  | 2         |           |         |       | 1871.928925 | 49.19     | LSLEGDHSTPPSAYGSVK |           |           |                 |                 |                   |
| 7        | 2           |             |                      | 634.326011 | 1899.956  | 3         |           |         |       | 1899.960236 | 61.86     | LSLEGDHSTPPSAYGSVK |           |           |                 |                 |                   |
| 7        | 2           |             |                      | 634.326011 | 1899.956  | 3         |           |         |       | 1899.960236 | 37.23     | LSLEGDHSTPPSAYGSVK |           |           |                 |                 |                   |
| 7        | 2           |             |                      | 634.326011 | 1899.956  | 3         |           |         |       | 1899.960236 | 42.16     | LSLEGDHSTPPSAYGSVK |           |           |                 |                 |                   |
| 7        | 2           |             |                      | 950.987461 | 1899.96   | 2         |           |         |       | 1899.960236 | 66.38     | LSLEGDHSTPPSAYGSVK |           |           |                 |                 |                   |
| 7        | 2           |             |                      | 950.987461 | 1899.96   | 2         |           |         |       | 1899.960236 | 40.85     | LSLEGDHSTPPSAYGSVK |           |           |                 |                 |                   |
| 7        | 2           |             |                      | 968.964191 | 1935.914  | 2         |           |         |       | 1935.908585 | 128.82    | AEDGVIDYELIDQDAR   |           |           |                 |                 |                   |
| 7        | 2           |             |                      | 968.964191 | 1935.914  | 2         |           |         |       | 1935.908585 | 128.29    | AEDGVIDYELIDQDAR   |           |           |                 |                 |                   |
| 7        | 2           |             |                      | 968.964191 | 1935.914  | 2         |           |         |       | 1935.908585 | 129.84    | AEDGVIDYELIDQDAR   |           |           |                 |                 |                   |
| 7        | 2           |             |                      | 698.343861 | 2092.01   | 3         |           |         |       | 2092.009689 | 54.35     | RAEDGVIDYELIDQDAR  |           |           |                 |                 |                   |
| 7        | 2           |             |                      | 698.343861 | 2092.01   | 3         |           |         |       | 2092.009689 | 34.67     | RAEDGVIDYELIDQDAR  |           |           |                 |                 |                   |
| 7        | 2           |             |                      | 698.343861 | 2092.01   | 3         |           |         |       | 2092.009689 | 57.99     | RAEDGVIDYELIDQDAR  |           |           |                 |                 |                   |
| 7        | 2           |             |                      | 1047.01252 | 2092.01   | 2         |           |         |       | 2092.009689 | 67.84     | RAEDGVIDYELIDQDAR  |           |           |                 |                 |                   |
| 7        | 2           |             |                      | 1047.01252 | 2092.01   | 2         |           |         |       | 2092.009689 | 73.09     | RAEDGVIDYELIDQDAR  |           |           |                 |                 |                   |
| 7        | 2           |             |                      | 1047.01252 | 2092.01   | 2         |           |         |       | 2092.009689 | 80.18     | RAEDGVIDYELIDQDAR  |           |           |                 |                 |                   |
| 7        | 2           |             |                      | 1047.01252 | 2092.01   | 2         |           |         |       | 2092.009689 | 80.04     | RAEDGVIDYELIDQDAR  |           |           |                 |                 |                   |
| 7        | 3           | IPI00021439 | Actin, cytoplasmic 1 | 336.70552  | 671.3965  | 2         | 2         | 2.10    | 0.67  | 671.399063  | 35.17     | LDLAGR             |           |           |                 |                 |                   |
| 7        | 3           |             |                      | 336.705623 | 671.3967  | 2         |           |         |       | 671.399063  | 25.29     | LDLAGR             |           |           |                 |                 |                   |
| 7        | 3           |             |                      | 336.735803 | 671.4571  | 2         |           |         |       | 671.460602  | 28.21     | GILTLK             |           |           |                 |                 |                   |
| 7        | 3           |             |                      | 350.751815 | 699.4891  | 2         |           |         |       | 699.491913  | 41.77     | GILTLK             |           |           |                 |                 |                   |
| 7        | 3           |             |                      | 350.751815 | 699.4891  | 2         |           |         |       | 699.491913  | 37.71     | GILTLK             |           |           |                 |                 |                   |
| 7        | 3           |             |                      | 412.255116 | 822.4957  | 2         |           |         |       | 822.498779  | 26.16     | IIAPPER            |           |           |                 |                 |                   |
| 7        | 3           |             |                      | 412.255116 | 822.4957  | 2         |           |         |       | 822.498779  | 29.61     | IIAPPER            |           |           |                 |                 |                   |
| 7        | 3           |             |                      | 412.255116 | 822.4957  | 2         |           |         |       | 822.498779  | 29.63     | IIAPPER            |           |           |                 |                 |                   |
| 7        | 3           |             |                      | 412.255126 | 822.4957  | 2         |           |         |       | 822.498779  | 29.54     | IIAPPER            |           |           |                 |                 |                   |
| 7        | 3           |             |                      | 412.255128 | 822.4957  | 2         |           |         |       | 822.498779  | 28.84     | IIAPPER            |           |           |                 |                 |                   |
| 7        | 3           |             |                      | 412.255223 | 822.4959  | 2         |           |         |       | 822.498779  | 28.92     | IIAPPER            |           |           |                 |                 |                   |
| 7        | 3           |             |                      | 412.255226 | 822.4959  | 2         |           |         |       | 822.498779  | 25.75     | IIAPPER            |           |           |                 |                 |                   |
| 7        | 3           |             |                      | 502.742677 | 1003.471  | 2         |           |         |       | 1003.474731 | 55.32     | AGFAGDDAPR         |           |           |                 |                 |                   |
| 7        | 3           |             |                      | 502.742678 | 1003.471  | 2         |           |         |       | 1003.474731 | 65.25     | AGFAGDDAPR         |           |           |                 |                 |                   |
| 7        | 3           |             |                      | 502.742943 | 1003.471  | 2         |           |         |       | 1003.474731 | 64.4      | AGFAGDDAPR         |           |           |                 |                 |                   |
| 7        | 3           |             |                      | 502.74314  | 1003.472  | 2         |           |         |       | 1003.474731 | 64.34     | AGFAGDDAPR         |           |           |                 |                 |                   |
| 7        | 3           |             |                      | 502.743307 | 1003.472  | 2         |           |         |       | 1003.474731 | 65.81     | AGFAGDDAPR         |           |           |                 |                 |                   |
| 7        | 3           |             |                      | 502.743388 | 1003.472  | 2         |           |         |       | 1003.474731 | 54.99     | AGFAGDDAPR         |           |           |                 |                 |                   |
| 7        | 3           |             |                      | 513.763453 | 1025.512  | 2         |           |         |       | 1025.512787 | 32.05     | DLTDYLMK           |           |           |                 |                 |                   |
| 7        | 3           |             |                      | 513.763453 | 1025.512  | 2         |           |         |       | 1025.512787 | 34.04     | DLTDYLMK           |           |           |                 |                 |                   |
| 7        | 3           |             |                      | 521.758892 | 1041.503  | 2         |           |         |       | 1041.507706 | 34.55     | DLTDYLMK           |           |           |                 |                 |                   |
| 7        | 3           |             |                      | 527.779134 | 1053.544  | 2         |           |         |       | 1053.544098 | 49.46     | DLTDYLMK           |           |           |                 |                 |                   |
| 7        | 3           |             |                      | 527.779139 | 1053.544  | 2         |           |         |       | 1053.544098 | 54.58     | DLTDYLMK           |           |           |                 |                 |                   |
| 7        | 3           |             |                      | 527.779139 | 1053.544  | 2         |           |         |       | 1053.544098 | 53.34     | DLTDYLMK           |           |           |                 |                 |                   |
| 7        | 3           |             |                      | 535.774983 | 1069.535  | 2         |           |         |       | 1069.539017 | 50.51     | DLTDYLMK           |           |           |                 |                 |                   |
| 7        | 3           |             |                      | 580.781385 | 1159.548  | 2         |           |         |       | 1159.553391 | 54.99     | GYSFTTTAER         |           |           |                 |                 |                   |
| 7        | 3           |             |                      | 580.781386 | 1159.548  | 2         |           |         |       | 1159.553391 | 62.99     | GYSFTTTAER         |           |           |                 |                 |                   |
| 7        | 3           |             |                      | 580.781386 | 1159.548  | 2         |           |         |       | 1159.553391 | 65.39     | GYSFTTTAER         |           |           |                 |                 |                   |
| 7        | 3           |             |                      | 595.327527 | 1188.641  | 2         |           |         |       | 1188.644852 | 50.76     | EITALAPSTMK        |           |           |                 |                 |                   |
| 7        | 3           |             |                      | 595.327528 | 1188.641  | 2         |           |         |       | 1188.644852 | 51.73     | EITALAPSTMK        |           |           |                 |                 |                   |
| 7        | 3           |             |                      | 595.327528 | 1188.641  | 2         |           |         |       | 1188.644852 | 55.8      | EITALAPSTMK        |           |           |                 |                 |                   |
| 7        | 3           |             |                      | 600.305442 | 1198.596  | 2         |           |         |       | 1198.597488 | 56.36     | HQGVVMVGMGQK       |           |           |                 |                 |                   |
| 7        | 3           |             |                      | 600.305442 | 1198.596  | 2         |           |         |       | 1198.597488 | 52.82     | HQGVVMVGMGQK       |           |           |                 |                 |                   |

| Band num | prot_hit_nu | prot_acc    | prot_desc            | pep_exp_mz | pep_exp_n | pep_exp_z | quantific | average | stdev | pep_calc_mr | pep_score | pep_seq                        | light m/z | heavy m/z | light intensity | heavy intensity | ratio light/heavy |
|----------|-------------|-------------|----------------------|------------|-----------|-----------|-----------|---------|-------|-------------|-----------|--------------------------------|-----------|-----------|-----------------|-----------------|-------------------|
| 7        | 3           |             |                      | 603.325025 | 1204.635  | 2         |           |         |       | 1204.639771 | 34.31     | EITALAPSTMK                    |           |           |                 |                 |                   |
| 7        | 3           |             |                      | 603.325025 | 1204.635  | 2         |           |         |       | 1204.639771 | 38.83     | EITALAPSTMK                    |           |           |                 |                 |                   |
| 7        | 3           |             |                      | 603.325025 | 1204.635  | 2         |           |         |       | 1204.639771 | 36.58     | EITALAPSTMK                    |           |           |                 |                 |                   |
| 7        | 3           |             |                      | 609.343776 | 1216.673  | 2         |           |         |       | 1216.676163 | 46.72     | EITALAPSTMK                    |           |           |                 |                 |                   |
| 7        | 3           |             |                      | 609.343776 | 1216.673  | 2         |           |         |       | 1216.676163 | 58.53     | EITALAPSTMK                    |           |           |                 |                 |                   |
| 7        | 3           |             |                      | 609.343776 | 1216.673  | 2         |           |         |       | 1216.676163 | 43.98     | EITALAPSTMK                    |           |           |                 |                 |                   |
| 7        | 3           |             |                      | 609.343778 | 1216.673  | 2         |           |         |       | 1216.676163 | 34.54     | EITALAPSTMK                    |           |           |                 |                 |                   |
| 7        | 3           |             |                      | 613.87198  | 1225.729  | 2         |           |         |       | 1225.731934 | 63.02     | AVFPSIVGRPR                    |           |           |                 |                 |                   |
| 7        | 3           |             |                      | 613.872039 | 1225.73   | 2         |           |         |       | 1225.731934 | 41.57     | AVFPSIVGRPR                    |           |           |                 |                 |                   |
| 7        | 3           |             |                      | 409.583952 | 1225.73   | 3         |           |         |       | 1225.731934 | 39.46     | AVFPSIVGRPR                    |           |           |                 |                 |                   |
| 7        | 3           |             |                      | 409.583967 | 1225.73   | 3         |           |         |       | 1225.731934 | 43.03     | AVFPSIVGRPR                    |           |           |                 |                 |                   |
| 7        | 3           |             |                      | 409.583993 | 1225.73   | 3         |           |         |       | 1225.731934 | 42.38     | AVFPSIVGRPR                    |           |           |                 |                 |                   |
| 7        | 3           |             |                      | 409.882652 | 1226.626  | 3         |           |         |       | 1226.628799 | 20.73     | HQGVMMVGMGQK                   |           |           |                 |                 |                   |
| 7        | 3           |             |                      | 614.320375 | 1226.626  | 2         |           |         |       | 1226.628799 | 40.93     | HQGVMMVGMGQK                   |           |           |                 |                 |                   |
| 7        | 3           |             |                      | 614.320375 | 1226.626  | 2         |           |         |       | 1226.628799 | 46.43     | HQGVMMVGMGQK                   |           |           |                 |                 |                   |
| 7        | 3           |             |                      | 614.320505 | 1226.626  | 2         |           |         |       | 1226.628799 | 44.17     | HQGVMMVGMGQK                   |           |           |                 |                 |                   |
| 7        | 3           |             |                      | 409.882849 | 1226.627  | 3         |           |         |       | 1226.628799 | 34.26     | HQGVMMVGMGQK                   |           |           |                 |                 |                   |
| 7        | 3           |             |                      | 617.340293 | 1232.666  | 2         |           |         |       | 1232.671082 | 46.93     | EITALAPSTMK                    |           |           |                 |                 |                   |
| 7        | 3           |             |                      | 617.340293 | 1232.666  | 2         |           |         |       | 1232.671082 | 47.14     | EITALAPSTMK                    |           |           |                 |                 |                   |
| 7        | 3           |             |                      | 627.796391 | 1253.578  | 2         |           |         |       | 1253.580002 | 42.75     | DSYVGDEAQS                     |           |           |                 |                 |                   |
| 7        | 3           |             |                      | 515.263324 | 1542.768  | 3         |           |         |       | 1542.77562  | 40.5      | IWHHTFYNELR                    |           |           |                 |                 |                   |
| 7        | 3           |             |                      | 515.263324 | 1542.768  | 3         |           |         |       | 1542.77562  | 31.76     | IWHHTFYNELR                    |           |           |                 |                 |                   |
| 7        | 3           |             |                      | 515.263384 | 1542.768  | 3         |           |         |       | 1542.77562  | 44.54     | IWHHTFYNELR                    |           |           |                 |                 |                   |
| 7        | 3           |             |                      | 515.582213 | 1543.725  | 3         |           |         |       | 1543.729111 | 50.33     | QEYDESGPSIVHR                  |           |           |                 |                 |                   |
| 7        | 3           |             |                      | 515.582391 | 1543.725  | 3         |           |         |       | 1543.729111 | 58.75     | QEYDESGPSIVHR                  |           |           |                 |                 |                   |
| 7        | 3           |             |                      | 515.582391 | 1543.725  | 3         |           |         |       | 1543.729111 | 74.4      | QEYDESGPSIVHR                  |           |           |                 |                 |                   |
| 7        | 3           |             |                      | 515.582391 | 1543.725  | 3         |           |         |       | 1543.729111 | 62.31     | QEYDESGPSIVHR                  |           |           |                 |                 |                   |
| 7        | 3           |             |                      | 772.872205 | 1543.73   | 2         |           |         |       | 1543.729111 | 73.34     | QEYDESGPSIVHR                  | 772.8722  | 774.8848  | 28.1            | 10.9            | 2.58              |
| 7        | 3           |             |                      | 772.872205 | 1543.73   | 2         |           |         |       | 1543.729111 | 84.2      | QEYDESGPSIVHR                  |           |           |                 |                 |                   |
| 7        | 3           |             |                      | 772.872428 | 1543.73   | 2         |           |         |       | 1543.729111 | 82.2      | QEYDESGPSIVHR                  |           |           |                 |                 |                   |
| 7        | 3           |             |                      | 909.970386 | 1817.926  | 2         |           |         |       | 1817.91835  | 100.15    | SYELPDGQVITIGNER               | 909.9704  | 911.9829  | 109             | 67.1            | 1.62              |
| 7        | 3           |             |                      | 909.970386 | 1817.926  | 2         |           |         |       | 1817.91835  | 123.45    | SYELPDGQVITIGNER               |           |           |                 |                 |                   |
| 7        | 3           |             |                      | 909.970386 | 1817.926  | 2         |           |         |       | 1817.91835  | 123.92    | SYELPDGQVITIGNER               |           |           |                 |                 |                   |
| 7        | 3           |             |                      | 909.970386 | 1817.926  | 2         |           |         |       | 1817.91835  | 104.25    | SYELPDGQVITIGNER               |           |           |                 |                 |                   |
| 7        | 3           |             |                      | 909.970415 | 1817.926  | 2         |           |         |       | 1817.91835  | 50.48     | SYELPDGQVITIGNER               |           |           |                 |                 |                   |
| 7        | 3           |             |                      | 991.553697 | 1981.093  | 2         |           |         |       | 1981.090836 | 83        | VAPEEHPVLLTEAPLNPK             |           |           |                 |                 |                   |
| 7        | 3           |             |                      | 661.371916 | 1981.094  | 3         |           |         |       | 1981.090836 | 34.57     | VAPEEHPVLLTEAPLNPK             |           |           |                 |                 |                   |
| 7        | 3           |             |                      | 661.372407 | 1981.095  | 3         |           |         |       | 1981.090836 | 75.06     | VAPEEHPVLLTEAPLNPK             |           |           |                 |                 |                   |
| 7        | 3           |             |                      | 661.372407 | 1981.095  | 3         |           |         |       | 1981.090836 | 71.78     | VAPEEHPVLLTEAPLNPK             |           |           |                 |                 |                   |
| 7        | 3           |             |                      | 661.372407 | 1981.095  | 3         |           |         |       | 1981.090836 | 59.74     | VAPEEHPVLLTEAPLNPK             |           |           |                 |                 |                   |
| 7        | 3           |             |                      | 661.37244  | 1981.095  | 3         |           |         |       | 1981.090836 | 63.32     | VAPEEHPVLLTEAPLNPK             |           |           |                 |                 |                   |
| 7        | 3           |             |                      | 670.714454 | 2009.122  | 3         |           |         |       | 2009.122147 | 32.18     | VAPEEHPVLLTEAPLNPK             |           |           |                 |                 |                   |
| 7        | 3           |             |                      | 670.715054 | 2009.123  | 3         |           |         |       | 2009.122147 | 48.91     | VAPEEHPVLLTEAPLNPK             |           |           |                 |                 |                   |
| 7        | 3           |             |                      | 670.715065 | 2009.123  | 3         |           |         |       | 2009.122147 | 44.99     | VAPEEHPVLLTEAPLNPK             |           |           |                 |                 |                   |
| 7        | 3           |             |                      | 670.715065 | 2009.123  | 3         |           |         |       | 2009.122147 | 47.99     | VAPEEHPVLLTEAPLNPK             |           |           |                 |                 |                   |
| 7        | 3           |             |                      | 670.715065 | 2009.123  | 3         |           |         |       | 2009.122147 | 48.75     | VAPEEHPVLLTEAPLNPK             |           |           |                 |                 |                   |
| 7        | 3           |             |                      | 1005.56954 | 2009.125  | 2         |           |         |       | 2009.122147 | 53.82     | VAPEEHPVLLTEAPLNPK             |           |           |                 |                 |                   |
| 7        | 3           |             |                      | 800.415818 | 2398.226  | 3         |           |         |       | 2398.222656 | 33.22     | KDLYANTVLSGGTTMYPGIADR         |           |           |                 |                 |                   |
| 7        | 3           |             |                      | 805.746996 | 2414.219  | 3         |           |         |       | 2414.217575 | 20.93     | KDLYANTVLSGGTTMYPGIADR         |           |           |                 |                 |                   |
| 7        | 3           |             |                      | 805.746996 | 2414.219  | 3         |           |         |       | 2414.217575 | 20.45     | KDLYANTVLSGGTTMYPGIADR         |           |           |                 |                 |                   |
| 7        | 3           |             |                      | 803.671158 | 3210.656  | 4         |           |         |       | 3210.640717 | 46.12     | TTGIVMDSGDGVTHTVPIYEGYALPHAILR |           |           |                 |                 |                   |
| 7        | 3           |             |                      | 803.671158 | 3210.656  | 4         |           |         |       | 3210.640717 | 57.59     | TTGIVMDSGDGVTHTVPIYEGYALPHAILR |           |           |                 |                 |                   |
| 7        | 3           |             |                      | 803.671158 | 3210.656  | 4         |           |         |       | 3210.640717 | 60.19     | TTGIVMDSGDGVTHTVPIYEGYALPHAILR |           |           |                 |                 |                   |
| 7        | 3           |             |                      | 803.671158 | 3210.656  | 4         |           |         |       | 3210.640717 | 60.21     | TTGIVMDSGDGVTHTVPIYEGYALPHAILR |           |           |                 |                 |                   |
| 7        | 3           |             |                      | 803.671324 | 3210.656  | 4         |           |         |       | 3210.640717 | 61.03     | TTGIVMDSGDGVTHTVPIYEGYALPHAILR |           |           |                 |                 |                   |
| 7        | 3           |             |                      | 803.671324 | 3210.656  | 4         |           |         |       | 3210.640717 | 61.55     | TTGIVMDSGDGVTHTVPIYEGYALPHAILR |           |           |                 |                 |                   |
| 7        | 3           |             |                      | 803.671324 | 3210.656  | 4         |           |         |       | 3210.640717 | 65.26     | TTGIVMDSGDGVTHTVPIYEGYALPHAILR |           |           |                 |                 |                   |
| 7        | 3           |             |                      | 803.671324 | 3210.656  | 4         |           |         |       | 3210.640717 | 52.04     | TTGIVMDSGDGVTHTVPIYEGYALPHAILR |           |           |                 |                 |                   |
| 7        | 3           | IPI00021440 | Actin, cytoplasmic 2 | 336.70552  | 671.3965  | 2         | 2         | 2.10    | 0.67  | 671.399063  | 35.17     | LDLAGR                         |           |           |                 |                 |                   |
| 7        | 3           |             |                      | 336.705623 | 671.3967  | 2         |           |         |       | 671.399063  | 25.29     | LDLAGR                         |           |           |                 |                 |                   |
| 7        | 3           |             |                      | 336.735803 | 671.4571  | 2         |           |         |       | 671.460602  | 28.21     | GILTLK                         |           |           |                 |                 |                   |
| 7        | 3           |             |                      | 350.751815 | 699.4891  | 2         |           |         |       | 699.491913  | 41.77     | GILTLK                         |           |           |                 |                 |                   |
| 7        | 3           |             |                      | 350.751815 | 699.4891  | 2         |           |         |       | 699.491913  | 37.71     | GILTLK                         |           |           |                 |                 |                   |

| Band num | prot_hit | nu | prot_acc | prot_desc | pep_exp_mz | pep_exp_n | pep_exp_z | quantific | average     | stdev | pep_calc_mr | pep_score | pep_seq          | light m/z | heavy m/z | light intensity | heavy intensity | ratio light/heavy |
|----------|----------|----|----------|-----------|------------|-----------|-----------|-----------|-------------|-------|-------------|-----------|------------------|-----------|-----------|-----------------|-----------------|-------------------|
| 7        | 3        |    |          |           | 412.255116 | 822.4957  | 2         |           | 822.498779  |       | 822.498779  | 26.16     | IIAPPER          |           |           |                 |                 |                   |
| 7        | 3        |    |          |           | 412.255116 | 822.4957  | 2         |           | 822.498779  |       | 822.498779  | 29.61     | IIAPPER          |           |           |                 |                 |                   |
| 7        | 3        |    |          |           | 412.255116 | 822.4957  | 2         |           | 822.498779  |       | 822.498779  | 29.63     | IIAPPER          |           |           |                 |                 |                   |
| 7        | 3        |    |          |           | 412.255126 | 822.4957  | 2         |           | 822.498779  |       | 822.498779  | 29.54     | IIAPPER          |           |           |                 |                 |                   |
| 7        | 3        |    |          |           | 412.255128 | 822.4957  | 2         |           | 822.498779  |       | 822.498779  | 28.84     | IIAPPER          |           |           |                 |                 |                   |
| 7        | 3        |    |          |           | 412.255223 | 822.4959  | 2         |           | 822.498779  |       | 822.498779  | 28.92     | IIAPPER          |           |           |                 |                 |                   |
| 7        | 3        |    |          |           | 412.255226 | 822.4959  | 2         |           | 822.498779  |       | 822.498779  | 25.75     | IIAPPER          |           |           |                 |                 |                   |
| 7        | 3        |    |          |           | 502.742677 | 1003.471  | 2         |           | 1003.474731 |       | 1003.474731 | 55.32     | AGFAGDDAPR       |           |           |                 |                 |                   |
| 7        | 3        |    |          |           | 502.742678 | 1003.471  | 2         |           | 1003.474731 |       | 1003.474731 | 65.25     | AGFAGDDAPR       |           |           |                 |                 |                   |
| 7        | 3        |    |          |           | 502.742943 | 1003.471  | 2         |           | 1003.474731 |       | 1003.474731 | 64.4      | AGFAGDDAPR       |           |           |                 |                 |                   |
| 7        | 3        |    |          |           | 502.74314  | 1003.472  | 2         |           | 1003.474731 |       | 1003.474731 | 64.34     | AGFAGDDAPR       |           |           |                 |                 |                   |
| 7        | 3        |    |          |           | 502.743307 | 1003.472  | 2         |           | 1003.474731 |       | 1003.474731 | 65.81     | AGFAGDDAPR       |           |           |                 |                 |                   |
| 7        | 3        |    |          |           | 502.743388 | 1003.472  | 2         |           | 1003.474731 |       | 1003.474731 | 54.99     | AGFAGDDAPR       |           |           |                 |                 |                   |
| 7        | 3        |    |          |           | 513.763453 | 1025.512  | 2         |           | 1025.512787 |       | 1025.512787 | 32.05     | DLTDYLMK         |           |           |                 |                 |                   |
| 7        | 3        |    |          |           | 513.763453 | 1025.512  | 2         |           | 1025.512787 |       | 1025.512787 | 34.04     | DLTDYLMK         |           |           |                 |                 |                   |
| 7        | 3        |    |          |           | 521.758892 | 1041.503  | 2         |           | 1041.507706 |       | 1041.507706 | 34.55     | DLTDYLMK         |           |           |                 |                 |                   |
| 7        | 3        |    |          |           | 527.779134 | 1053.544  | 2         |           | 1053.544098 |       | 1053.544098 | 49.46     | DLTDYLMK         |           |           |                 |                 |                   |
| 7        | 3        |    |          |           | 527.779139 | 1053.544  | 2         |           | 1053.544098 |       | 1053.544098 | 54.58     | DLTDYLMK         |           |           |                 |                 |                   |
| 7        | 3        |    |          |           | 527.779139 | 1053.544  | 2         |           | 1053.544098 |       | 1053.544098 | 53.34     | DLTDYLMK         |           |           |                 |                 |                   |
| 7        | 3        |    |          |           | 535.774983 | 1069.535  | 2         |           | 1069.539017 |       | 1069.539017 | 50.51     | DLTDYLMK         |           |           |                 |                 |                   |
| 7        | 3        |    |          |           | 580.781385 | 1159.548  | 2         |           | 1159.553391 |       | 1159.553391 | 54.99     | GYSFTTTAER       |           |           |                 |                 |                   |
| 7        | 3        |    |          |           | 580.781386 | 1159.548  | 2         |           | 1159.553391 |       | 1159.553391 | 62.99     | GYSFTTTAER       |           |           |                 |                 |                   |
| 7        | 3        |    |          |           | 580.781386 | 1159.548  | 2         |           | 1159.553391 |       | 1159.553391 | 65.39     | GYSFTTTAER       |           |           |                 |                 |                   |
| 7        | 3        |    |          |           | 595.327527 | 1188.641  | 2         |           | 1188.644852 |       | 1188.644852 | 50.76     | EITALAPSTMK      |           |           |                 |                 |                   |
| 7        | 3        |    |          |           | 595.327528 | 1188.641  | 2         |           | 1188.644852 |       | 1188.644852 | 51.73     | EITALAPSTMK      |           |           |                 |                 |                   |
| 7        | 3        |    |          |           | 595.327528 | 1188.641  | 2         |           | 1188.644852 |       | 1188.644852 | 55.8      | EITALAPSTMK      |           |           |                 |                 |                   |
| 7        | 3        |    |          |           | 600.305442 | 1198.596  | 2         |           | 1198.597488 |       | 1198.597488 | 56.36     | HQGVMMVGMGQK     |           |           |                 |                 |                   |
| 7        | 3        |    |          |           | 600.305442 | 1198.596  | 2         |           | 1198.597488 |       | 1198.597488 | 52.82     | HQGVMMVGMGQK     |           |           |                 |                 |                   |
| 7        | 3        |    |          |           | 603.325025 | 1204.635  | 2         |           | 1204.639771 |       | 1204.639771 | 34.31     | EITALAPSTMK      |           |           |                 |                 |                   |
| 7        | 3        |    |          |           | 603.325025 | 1204.635  | 2         |           | 1204.639771 |       | 1204.639771 | 38.83     | EITALAPSTMK      |           |           |                 |                 |                   |
| 7        | 3        |    |          |           | 603.325025 | 1204.635  | 2         |           | 1204.639771 |       | 1204.639771 | 36.58     | EITALAPSTMK      |           |           |                 |                 |                   |
| 7        | 3        |    |          |           | 609.343776 | 1216.673  | 2         |           | 1216.676163 |       | 1216.676163 | 46.72     | EITALAPSTMK      |           |           |                 |                 |                   |
| 7        | 3        |    |          |           | 609.343776 | 1216.673  | 2         |           | 1216.676163 |       | 1216.676163 | 58.53     | EITALAPSTMK      |           |           |                 |                 |                   |
| 7        | 3        |    |          |           | 609.343776 | 1216.673  | 2         |           | 1216.676163 |       | 1216.676163 | 43.98     | EITALAPSTMK      |           |           |                 |                 |                   |
| 7        | 3        |    |          |           | 609.343778 | 1216.673  | 2         |           | 1216.676163 |       | 1216.676163 | 34.54     | EITALAPSTMK      |           |           |                 |                 |                   |
| 7        | 3        |    |          |           | 613.87198  | 1225.729  | 2         |           | 1225.731934 |       | 1225.731934 | 63.02     | AVFPSIVGRPR      |           |           |                 |                 |                   |
| 7        | 3        |    |          |           | 613.872039 | 1225.73   | 2         |           | 1225.731934 |       | 1225.731934 | 41.57     | AVFPSIVGRPR      |           |           |                 |                 |                   |
| 7        | 3        |    |          |           | 409.583952 | 1225.73   | 3         |           | 1225.731934 |       | 1225.731934 | 39.46     | AVFPSIVGRPR      |           |           |                 |                 |                   |
| 7        | 3        |    |          |           | 409.583967 | 1225.73   | 3         |           | 1225.731934 |       | 1225.731934 | 43.03     | AVFPSIVGRPR      |           |           |                 |                 |                   |
| 7        | 3        |    |          |           | 409.583993 | 1225.73   | 3         |           | 1225.731934 |       | 1225.731934 | 42.38     | AVFPSIVGRPR      |           |           |                 |                 |                   |
| 7        | 3        |    |          |           | 409.882652 | 1226.626  | 3         |           | 1226.628799 |       | 1226.628799 | 20.73     | HQGVMMVGMGQK     |           |           |                 |                 |                   |
| 7        | 3        |    |          |           | 614.320375 | 1226.626  | 2         |           | 1226.628799 |       | 1226.628799 | 40.93     | HQGVMMVGMGQK     |           |           |                 |                 |                   |
| 7        | 3        |    |          |           | 614.320375 | 1226.626  | 2         |           | 1226.628799 |       | 1226.628799 | 46.43     | HQGVMMVGMGQK     |           |           |                 |                 |                   |
| 7        | 3        |    |          |           | 614.320505 | 1226.626  | 2         |           | 1226.628799 |       | 1226.628799 | 44.17     | HQGVMMVGMGQK     |           |           |                 |                 |                   |
| 7        | 3        |    |          |           | 409.882849 | 1226.627  | 3         |           | 1226.628799 |       | 1226.628799 | 34.26     | HQGVMMVGMGQK     |           |           |                 |                 |                   |
| 7        | 3        |    |          |           | 617.340293 | 1232.666  | 2         |           | 1232.671082 |       | 1232.671082 | 46.93     | EITALAPSTMK      |           |           |                 |                 |                   |
| 7        | 3        |    |          |           | 617.340293 | 1232.666  | 2         |           | 1232.671082 |       | 1232.671082 | 47.14     | EITALAPSTMK      |           |           |                 |                 |                   |
| 7        | 3        |    |          |           | 627.796391 | 1253.578  | 2         |           | 1253.580002 |       | 1253.580002 | 42.75     | DSYVGEAQSK       |           |           |                 |                 |                   |
| 7        | 3        |    |          |           | 515.263324 | 1542.768  | 3         |           | 1542.77562  |       | 1542.77562  | 40.5      | IWHHTFYNELR      |           |           |                 |                 |                   |
| 7        | 3        |    |          |           | 515.263324 | 1542.768  | 3         |           | 1542.77562  |       | 1542.77562  | 31.76     | IWHHTFYNELR      |           |           |                 |                 |                   |
| 7        | 3        |    |          |           | 515.263384 | 1542.768  | 3         |           | 1542.77562  |       | 1542.77562  | 44.54     | IWHHTFYNELR      |           |           |                 |                 |                   |
| 7        | 3        |    |          |           | 515.582213 | 1543.725  | 3         |           | 1543.729111 |       | 1543.729111 | 50.33     | QEYDESGPSIVHR    |           |           |                 |                 |                   |
| 7        | 3        |    |          |           | 515.582391 | 1543.725  | 3         |           | 1543.729111 |       | 1543.729111 | 58.75     | QEYDESGPSIVHR    |           |           |                 |                 |                   |
| 7        | 3        |    |          |           | 515.582391 | 1543.725  | 3         |           | 1543.729111 |       | 1543.729111 | 74.4      | QEYDESGPSIVHR    |           |           |                 |                 |                   |
| 7        | 3        |    |          |           | 515.582391 | 1543.725  | 3         |           | 1543.729111 |       | 1543.729111 | 62.31     | QEYDESGPSIVHR    |           |           |                 |                 |                   |
| 7        | 3        |    |          |           | 772.872205 | 1543.73   | 2         |           | 1543.729111 |       | 1543.729111 | 73.34     | QEYDESGPSIVHR    |           |           |                 |                 |                   |
| 7        | 3        |    |          |           | 772.872205 | 1543.73   | 2         |           | 1543.729111 |       | 1543.729111 | 84.2      | QEYDESGPSIVHR    |           |           |                 |                 |                   |
| 7        | 3        |    |          |           | 772.872428 | 1543.73   | 2         |           | 1543.729111 |       | 1543.729111 | 82.2      | QEYDESGPSIVHR    |           |           |                 |                 |                   |
| 7        | 3        |    |          |           | 909.970386 | 1817.926  | 2         |           | 1817.91835  |       | 1817.91835  | 100.15    | SYELPDGQVITIGNER |           |           |                 |                 |                   |
| 7        | 3        |    |          |           | 909.970386 | 1817.926  | 2         |           | 1817.91835  |       | 1817.91835  | 123.45    | SYELPDGQVITIGNER |           |           |                 |                 |                   |
| 7        | 3        |    |          |           | 909.970386 | 1817.926  | 2         |           | 1817.91835  |       | 1817.91835  | 123.92    | SYELPDGQVITIGNER |           |           |                 |                 |                   |
| 7        | 3        |    |          |           | 909.970386 | 1817.926  | 2         |           | 1817.91835  |       | 1817.91835  | 104.25    | SYELPDGQVITIGNER |           |           |                 |                 |                   |
| 7        | 3        |    |          |           | 909.970415 | 1817.926  | 2         |           | 1817.91835  |       | 1817.91835  | 50.48     | SYELPDGQVITIGNER |           |           |                 |                 |                   |

| Band num | prot_hit_nu | prot_acc    | prot_desc                 | pep_exp_mz | pep_exp_n | pep_exp_z | quantific | average | stdev | pep_calc_mr | pep_score | pep_seq                        | light m/z | heavy m/z | light intensity | heavy intensity | ratio light/heavy |  |
|----------|-------------|-------------|---------------------------|------------|-----------|-----------|-----------|---------|-------|-------------|-----------|--------------------------------|-----------|-----------|-----------------|-----------------|-------------------|--|
| 7        | 3           |             |                           | 991.553697 | 1981.093  | 2         |           |         |       | 1981.090836 | 83        | VAPEEHPVLLTEAPLNPK             |           |           |                 |                 |                   |  |
| 7        | 3           |             |                           | 661.371916 | 1981.094  | 3         |           |         |       | 1981.090836 | 34.57     | VAPEEHPVLLTEAPLNPK             |           |           |                 |                 |                   |  |
| 7        | 3           |             |                           | 661.372407 | 1981.095  | 3         |           |         |       | 1981.090836 | 75.06     | VAPEEHPVLLTEAPLNPK             |           |           |                 |                 |                   |  |
| 7        | 3           |             |                           | 661.372407 | 1981.095  | 3         |           |         |       | 1981.090836 | 71.78     | VAPEEHPVLLTEAPLNPK             |           |           |                 |                 |                   |  |
| 7        | 3           |             |                           | 661.372407 | 1981.095  | 3         |           |         |       | 1981.090836 | 59.74     | VAPEEHPVLLTEAPLNPK             |           |           |                 |                 |                   |  |
| 7        | 3           |             |                           | 661.37244  | 1981.095  | 3         |           |         |       | 1981.090836 | 63.32     | VAPEEHPVLLTEAPLNPK             |           |           |                 |                 |                   |  |
| 7        | 3           |             |                           | 670.714454 | 2009.122  | 3         |           |         |       | 2009.122147 | 32.18     | VAPEEHPVLLTEAPLNPK             |           |           |                 |                 |                   |  |
| 7        | 3           |             |                           | 670.715054 | 2009.123  | 3         |           |         |       | 2009.122147 | 48.91     | VAPEEHPVLLTEAPLNPK             |           |           |                 |                 |                   |  |
| 7        | 3           |             |                           | 670.715065 | 2009.123  | 3         |           |         |       | 2009.122147 | 44.99     | VAPEEHPVLLTEAPLNPK             |           |           |                 |                 |                   |  |
| 7        | 3           |             |                           | 670.715065 | 2009.123  | 3         |           |         |       | 2009.122147 | 47.99     | VAPEEHPVLLTEAPLNPK             |           |           |                 |                 |                   |  |
| 7        | 3           |             |                           | 670.715065 | 2009.123  | 3         |           |         |       | 2009.122147 | 48.75     | VAPEEHPVLLTEAPLNPK             |           |           |                 |                 |                   |  |
| 7        | 3           |             |                           | 1005.56954 | 2009.125  | 2         |           |         |       | 2009.122147 | 53.82     | VAPEEHPVLLTEAPLNPK             |           |           |                 |                 |                   |  |
| 7        | 3           |             |                           | 800.415818 | 2398.226  | 3         |           |         |       | 2398.222656 | 33.22     | KDLYANTVLSGGTTMYPGIADR         |           |           |                 |                 |                   |  |
| 7        | 3           |             |                           | 805.746996 | 2414.219  | 3         |           |         |       | 2414.217575 | 20.93     | KDLYANTVLSGGTTMYPGIADR         |           |           |                 |                 |                   |  |
| 7        | 3           |             |                           | 805.746996 | 2414.219  | 3         |           |         |       | 2414.217575 | 20.45     | KDLYANTVLSGGTTMYPGIADR         |           |           |                 |                 |                   |  |
| 7        | 3           |             |                           | 803.671158 | 3210.656  | 4         |           |         |       | 3210.640717 | 46.12     | TTGIVMDSGDGVHTTVPIYEGYALPHAILR |           |           |                 |                 |                   |  |
| 7        | 3           |             |                           | 803.671158 | 3210.656  | 4         |           |         |       | 3210.640717 | 57.59     | TTGIVMDSGDGVHTTVPIYEGYALPHAILR |           |           |                 |                 |                   |  |
| 7        | 3           |             |                           | 803.671158 | 3210.656  | 4         |           |         |       | 3210.640717 | 60.19     | TTGIVMDSGDGVHTTVPIYEGYALPHAILR |           |           |                 |                 |                   |  |
| 7        | 3           |             |                           | 803.671158 | 3210.656  | 4         |           |         |       | 3210.640717 | 60.21     | TTGIVMDSGDGVHTTVPIYEGYALPHAILR |           |           |                 |                 |                   |  |
| 7        | 3           |             |                           | 803.671324 | 3210.656  | 4         |           |         |       | 3210.640717 | 61.03     | TTGIVMDSGDGVHTTVPIYEGYALPHAILR |           |           |                 |                 |                   |  |
| 7        | 3           |             |                           | 803.671324 | 3210.656  | 4         |           |         |       | 3210.640717 | 61.55     | TTGIVMDSGDGVHTTVPIYEGYALPHAILR |           |           |                 |                 |                   |  |
| 7        | 3           |             |                           | 803.671324 | 3210.656  | 4         |           |         |       | 3210.640717 | 65.26     | TTGIVMDSGDGVHTTVPIYEGYALPHAILR |           |           |                 |                 |                   |  |
| 7        | 3           |             |                           | 803.671324 | 3210.656  | 4         |           |         |       | 3210.640717 | 52.04     | TTGIVMDSGDGVHTTVPIYEGYALPHAILR |           |           |                 |                 |                   |  |
| 7        | 4           | IPI00021263 | 14-3-3 protein zeta/delta | 468.280323 | 934.5461  | 2         | 2         | 3.64    | 0.69  | 934.551193  | 33.66     | NLLSVAYK                       |           |           |                 |                 |                   |  |
| 7        | 4           |             |                           | 482.2962   | 962.5778  | 2         |           |         |       | 962.582504  | 25.14     | NLLSVAYK                       |           |           |                 |                 |                   |  |
| 7        | 4           |             |                           | 482.2962   | 962.5778  | 2         |           |         |       | 962.582504  | 25.76     | NLLSVAYK                       |           |           |                 |                 |                   |  |
| 7        | 4           |             |                           | 568.79811  | 1135.582  | 2         |           |         |       | 1135.583267 | 59.07     | EMQPTHPIR                      |           |           |                 |                 |                   |  |
| 7        | 4           |             |                           | 568.798476 | 1135.582  | 2         |           |         |       | 1135.583267 | 45.95     | EMQPTHPIR                      |           |           |                 |                 |                   |  |
| 7        | 4           |             |                           | 379.535145 | 1135.584  | 3         |           |         |       | 1135.583267 | 38.54     | EMQPTHPIR                      |           |           |                 |                 |                   |  |
| 7        | 4           |             |                           | 379.535507 | 1135.585  | 3         |           |         |       | 1135.583267 | 35.48     | EMQPTHPIR                      |           |           |                 |                 |                   |  |
| 7        | 4           |             |                           | 609.350927 | 1216.687  | 2         |           |         |       | 1216.687393 | 80.79     | DSTLIMQLLR                     |           |           |                 |                 |                   |  |
| 7        | 4           |             |                           | 609.350927 | 1216.687  | 2         |           |         |       | 1216.687393 | 75.96     | DSTLIMQLLR                     |           |           |                 |                 |                   |  |
| 7        | 4           |             |                           | 609.351507 | 1216.688  | 2         |           |         |       | 1216.687393 | 80.5      | DSTLIMQLLR                     |           |           |                 |                 |                   |  |
| 7        | 4           |             |                           | 609.351507 | 1216.688  | 2         |           |         |       | 1216.687393 | 85.72     | DSTLIMQLLR                     |           |           |                 |                 |                   |  |
| 7        | 4           |             |                           | 609.3516   | 1216.689  | 2         |           |         |       | 1216.687393 | 88.41     | DSTLIMQLLR                     |           |           |                 |                 |                   |  |
| 7        | 4           |             |                           | 609.351771 | 1216.689  | 2         |           |         |       | 1216.687393 | 88.55     | DSTLIMQLLR                     |           |           |                 |                 |                   |  |
| 7        | 4           |             |                           | 617.348426 | 1232.682  | 2         |           |         |       | 1232.682312 | 74.9      | DSTLIMQLLR                     |           |           |                 |                 |                   |  |
| 7        | 4           |             |                           | 617.348426 | 1232.682  | 2         |           |         |       | 1232.682312 | 77.05     | DSTLIMQLLR                     |           |           |                 |                 |                   |  |
| 7        | 4           |             |                           | 617.348487 | 1232.682  | 2         |           |         |       | 1232.682312 | 74.53     | DSTLIMQLLR                     |           |           |                 |                 |                   |  |
| 7        | 4           |             |                           | 617.348563 | 1232.683  | 2         |           |         |       | 1232.682312 | 77.13     | DSTLIMQLLR                     |           |           |                 |                 |                   |  |
| 7        | 4           |             |                           | 617.348563 | 1232.683  | 2         |           |         |       | 1232.682312 | 59.79     | DSTLIMQLLR                     |           |           |                 |                 |                   |  |
| 7        | 4           |             |                           | 617.348563 | 1232.683  | 2         |           |         |       | 1232.682312 | 33.56     | DSTLIMQLLR                     |           |           |                 |                 |                   |  |
| 7        | 4           |             |                           | 617.348563 | 1232.683  | 2         |           |         |       | 1232.682312 | 74.86     | DSTLIMQLLR                     |           |           |                 |                 |                   |  |
| 7        | 4           |             |                           | 617.348563 | 1232.683  | 2         |           |         |       | 1232.682312 | 70.49     | DSTLIMQLLR                     |           |           |                 |                 |                   |  |
| 7        | 4           |             |                           | 680.876948 | 1359.739  | 2         |           |         |       | 1359.742249 | 38.09     | FLIPNASQAESK                   |           |           |                 |                 |                   |  |
| 7        | 4           |             |                           | 680.876948 | 1359.739  | 2         |           |         |       | 1359.742249 | 38.96     | FLIPNASQAESK                   |           |           |                 |                 |                   |  |
| 7        | 4           |             |                           | 723.882542 | 1445.751  | 2         |           |         |       | 1445.746017 | 59.26     | DICNDVLSLLEK                   |           |           |                 |                 |                   |  |
| 7        | 4           |             |                           | 723.883496 | 1445.752  | 2         |           |         |       | 1445.746017 | 81.61     | DICNDVLSLLEK                   |           |           |                 |                 |                   |  |
| 7        | 4           |             |                           | 723.883496 | 1445.752  | 2         |           |         |       | 1445.746017 | 69.38     | DICNDVLSLLEK                   |           |           |                 |                 |                   |  |
| 7        | 4           |             |                           | 723.883881 | 1445.753  | 2         |           |         |       | 1445.746017 | 41.78     | DICNDVLSLLEK                   |           |           |                 |                 |                   |  |
| 7        | 4           |             |                           | 737.896402 | 1473.778  | 2         |           |         |       | 1473.777328 | 74.72     | DICNDVLSLLEK                   |           |           |                 |                 |                   |  |
| 7        | 4           |             |                           | 737.896402 | 1473.778  | 2         |           |         |       | 1473.777328 | 77.74     | DICNDVLSLLEK                   |           |           |                 |                 |                   |  |
| 7        | 4           |             |                           | 737.896402 | 1473.778  | 2         |           |         |       | 1473.777328 | 69.17     | DICNDVLSLLEK                   |           |           |                 |                 |                   |  |
| 7        | 4           |             |                           | 737.896732 | 1473.779  | 2         |           |         |       | 1473.777328 | 70.48     | DICNDVLSLLEK                   |           |           |                 |                 |                   |  |
| 7        | 4           |             |                           | 788.876602 | 1575.739  | 2         |           |         |       | 1575.740051 | 111.55    | SVTEQGAELSNEER                 | 788.8768  | 790.8894  | 35              | 11.1            | 3.15              |  |
| 7        | 4           |             |                           | 788.876602 | 1575.739  | 2         |           |         |       | 1575.740051 | 120       | SVTEQGAELSNEER                 |           |           |                 |                 |                   |  |
| 7        | 4           |             |                           | 788.876837 | 1575.739  | 2         |           |         |       | 1575.740051 | 131.78    | SVTEQGAELSNEER                 |           |           |                 |                 |                   |  |
| 7        | 4           |             |                           | 1035.01763 | 2068.021  | 2         |           |         |       | 2068.013702 | 103.86    | GIVDQSQQAYQEAFAEISK            |           |           |                 |                 |                   |  |
| 7        | 4           |             |                           | 1035.01763 | 2068.021  | 2         |           |         |       | 2068.013702 | 129.19    | GIVDQSQQAYQEAFAEISK            |           |           |                 |                 |                   |  |
| 7        | 4           |             |                           | 1035.01763 | 2068.021  | 2         |           |         |       | 2068.013702 | 121.67    | GIVDQSQQAYQEAFAEISK            |           |           |                 |                 |                   |  |
| 7        | 4           |             |                           | 1049.0326  | 2096.051  | 2         |           |         |       | 2096.045013 | 149.3     | GIVDQSQQAYQEAFAEISK            | 1049.033  | 1051.045  | 5.32            | 1.29            | 4.12              |  |
| 7        | 4           |             |                           | 1049.0326  | 2096.051  | 2         |           |         |       | 2096.045013 | 130.74    | GIVDQSQQAYQEAFAEISK            |           |           |                 |                 |                   |  |
| 7        | 4           |             |                           | 1049.0326  | 2096.051  | 2         |           |         |       | 2096.045013 | 141.89    | GIVDQSQQAYQEAFAEISK            |           |           |                 |                 |                   |  |

| Band num | prot_hit_nu | prot_acc    | prot_desc                 | pep_exp_mz | pep_exp_n | pep_exp_z | quantific | average | stdev | pep_calc_mr | pep_score   | pep_seq             | light m/z    | heavy m/z | light intensity | heavy intensity | ratio light/heavy |      |
|----------|-------------|-------------|---------------------------|------------|-----------|-----------|-----------|---------|-------|-------------|-------------|---------------------|--------------|-----------|-----------------|-----------------|-------------------|------|
| 7        | 4           |             |                           | 730.022844 | 2187.047  | 3         |           |         |       | 2187.0495   | 22.81       | TAFDEAIAELDTLSEESYK |              |           |                 |                 |                   |      |
| 7        | 4           |             |                           | 730.022844 | 2187.047  | 3         |           |         |       | 2187.0495   | 20.6        | TAFDEAIAELDTLSEESYK |              |           |                 |                 |                   |      |
| 7        | 5           | IPI00217966 | lactate dehydrogenase A   | 385.748116 | 769.4817  | 2         | 3         | 2.85    | 0.50  | 769.483459  | 28.5        | LNLVQR              |              |           |                 |                 |                   |      |
| 7        | 5           |             |                           | 385.748116 | 769.4817  | 2         |           |         |       |             | 769.483459  | 33                  | LNLVQR       |           |                 |                 |                   |      |
| 7        | 5           |             |                           | 385.748116 | 769.4817  | 2         |           |         |       |             | 769.483459  | 32.92               | LNLVQR       |           |                 |                 |                   |      |
| 7        | 5           |             |                           | 398.704607 | 795.3947  | 2         |           |         |       |             | 795.397339  | 24.31               | YLMGER       |           |                 |                 |                   |      |
| 7        | 5           |             |                           | 398.70461  | 795.3947  | 2         |           |         |       |             | 795.397339  | 21.6                | YLMGER       |           |                 |                 |                   |      |
| 7        | 5           |             |                           | 471.309814 | 940.6051  | 2         |           |         |       |             | 940.609375  | 37.6                | LVIITAGAR    |           |                 |                 |                   |      |
| 7        | 5           |             |                           | 471.309814 | 940.6051  | 2         |           |         |       |             | 940.609375  | 43.59               | LVIITAGAR    |           |                 |                 |                   |      |
| 7        | 5           |             |                           | 471.309839 | 940.6051  | 2         |           |         |       |             | 940.609375  | 46.3                | LVIITAGAR    |           |                 |                 |                   |      |
| 7        | 5           |             |                           | 479.310084 | 956.6056  | 2         |           |         |       |             | 956.608307  | 40.28               | FIIPNVVK     |           |                 |                 |                   |      |
| 7        | 5           |             |                           | 493.325416 | 984.6363  | 2         |           |         |       |             | 984.639618  | 24.48               | FIIPNVVK     |           |                 |                 |                   |      |
| 7        | 5           |             |                           | 347.203386 | 1038.588  | 3         |           |         |       |             | 1038.592026 | 21.75               | VHPVSTMIK    |           |                 |                 |                   |      |
| 7        | 5           |             |                           | 361.87926  | 1082.616  | 3         |           |         |       |             | 1082.618256 | 32.97               | VHPVSTMIK    |           |                 |                 |                   |      |
| 7        | 5           |             |                           | 573.810737 | 1145.607  | 2         |           |         |       |             | 1145.610519 | 52.28               | SADTLWGIQK   | 581.8007  | 583.8132        | 117             | 51.5              | 2.27 |
| 7        | 5           |             |                           | 581.800683 | 1161.587  | 2         |           |         |       |             | 1161.590164 | 57.25               | VTLTSEEEAR   |           |                 |                 |                   |      |
| 7        | 5           |             |                           | 581.800684 | 1161.587  | 2         |           |         |       |             | 1161.590164 | 61.22               | VTLTSEEEAR   |           |                 |                 |                   |      |
| 7        | 5           |             |                           | 581.800684 | 1161.587  | 2         |           |         |       |             | 1161.590164 | 78.12               | VTLTSEEEAR   |           |                 |                 |                   |      |
| 7        | 5           |             |                           | 581.800686 | 1161.587  | 2         |           |         |       |             | 1161.590164 | 54.01               | VTLTSEEEAR   |           |                 |                 |                   |      |
| 7        | 5           |             |                           | 587.827031 | 1173.64   | 2         |           |         |       |             | 1173.64183  | 56.29               | SADTLWGIQK   |           |                 |                 |                   |      |
| 7        | 5           |             |                           | 587.827031 | 1173.64   | 2         |           |         |       |             | 1173.64183  | 69.03               | SADTLWGIQK   |           |                 |                 |                   |      |
| 7        | 5           |             |                           | 588.355137 | 1174.696  | 2         |           |         |       |             | 1174.698608 | 41.31               | DQLIYNLLK    |           |                 |                 |                   |      |
| 7        | 5           |             |                           | 588.355137 | 1174.696  | 2         |           |         |       |             | 1174.698608 | 39.99               | DQLIYNLLK    |           |                 |                 |                   |      |
| 7        | 5           |             |                           | 588.355137 | 1174.696  | 2         |           |         |       |             | 1174.698608 | 41.38               | DQLIYNLLK    |           |                 |                 |                   |      |
| 7        | 5           |             |                           | 588.355137 | 1174.696  | 2         |           |         |       |             | 1174.698608 | 44.72               | DQLIYNLLK    |           |                 |                 |                   |      |
| 7        | 5           |             |                           | 408.58103  | 1222.721  | 3         |           |         |       |             | 1222.724442 | 37.46               | RVHPVSTMIK   |           |                 |                 |                   |      |
| 7        | 5           |             |                           | 638.820437 | 1275.626  | 2         |           |         |       |             | 1275.626556 | 45.99               | VIGSGCNLDSAR |           |                 |                 |                   |      |
| 7        | 5           |             |                           | 638.820437 | 1275.626  | 2         |           |         |       |             | 1275.626556 | 56.44               | VIGSGCNLDSAR |           |                 |                 |                   |      |
| 7        | 5           |             |                           | 638.820441 | 1275.626  | 2         |           |         |       |             | 1275.626556 | 49.74               | VIGSGCNLDSAR |           |                 |                 |                   |      |
| 7        | 5           |             | 638.820444                | 1275.626   | 2         |           |           |         |       | 1275.626556 | 43.6        | VIGSGCNLDSAR        |              |           |                 |                 |                   |      |
| 7        | 5           |             | 646.858519                | 1291.702   | 2         |           |           |         |       | 1291.704773 | 55.34       | QVVESAYEVIK         |              |           |                 |                 |                   |      |
| 7        | 5           |             | 646.858519                | 1291.702   | 2         |           |           |         |       | 1291.704773 | 50.47       | QVVESAYEVIK         |              |           |                 |                 |                   |      |
| 7        | 5           |             | 660.874609                | 1319.735   | 2         |           |           |         |       | 1319.736084 | 57.45       | QVVESAYEVIK         |              |           |                 |                 |                   |      |
| 7        | 5           |             | 660.874609                | 1319.735   | 2         |           |           |         |       | 1319.736084 | 58.29       | QVVESAYEVIK         |              |           |                 |                 |                   |      |
| 7        | 5           |             | 660.874609                | 1319.735   | 2         |           |           |         |       | 1319.736084 | 60.25       | QVVESAYEVIK         |              |           |                 |                 |                   |      |
| 7        | 5           |             | 554.61062                 | 1660.81    | 3         |           |           |         |       | 1660.808945 | 53.93       | GEMMDLQHGSLFLR      | 554.6106     | 555.9523  | 13.1            | 4.15            | 3.16              |      |
| 7        | 5           |             | 554.61062                 | 1660.81    | 3         |           |           |         |       | 1660.808945 | 70.13       | GEMMDLQHGSLFLR      |              |           |                 |                 |                   |      |
| 7        | 5           |             | 554.610655                | 1660.81    | 3         |           |           |         |       | 1660.808945 | 52.38       | GEMMDLQHGSLFLR      |              |           |                 |                 |                   |      |
| 7        | 5           |             | 831.413825                | 1660.813   | 2         |           |           |         |       | 1660.808945 | 57.35       | GEMMDLQHGSLFLR      |              |           |                 |                 |                   |      |
| 7        | 5           |             | 831.413825                | 1660.813   | 2         |           |           |         |       | 1660.808945 | 63.55       | GEMMDLQHGSLFLR      |              |           |                 |                 |                   |      |
| 7        | 5           |             | 831.413825                | 1660.813   | 2         |           |           |         |       | 1660.808945 | 54.79       | GEMMDLQHGSLFLR      |              |           |                 |                 |                   |      |
| 7        | 5           |             | 839.410342                | 1676.806   | 2         |           |           |         |       | 1676.803864 | 21.29       | GEMMDLQHGSLFLR      |              |           |                 |                 |                   |      |
| 7        | 5           |             | 562.632685                | 1684.876   | 3         |           |           |         |       | 1684.879517 | 24.2        | DLADELALVDVIEDK     |              |           |                 |                 |                   |      |
| 7        | 5           |             | 843.448366                | 1684.882   | 2         |           |           |         |       | 1684.879517 | 118.55      | DLADELALVDVIEDK     | 843.4484     | 845.4609  | 29.9            | 9.62            | 3.11              |      |
| 7        | 5           |             | 843.448366                | 1684.882   | 2         |           |           |         |       | 1684.879517 | 138.21      | DLADELALVDVIEDK     |              |           |                 |                 |                   |      |
| 7        | 5           |             | 843.448366                | 1684.882   | 2         |           |           |         |       | 1684.879517 | 115.04      | DLADELALVDVIEDK     |              |           |                 |                 |                   |      |
| 7        | 5           |             | 571.976543                | 1712.908   | 3         |           |           |         |       | 1712.910828 | 57.6        | DLADELALVDVIEDK     |              |           |                 |                 |                   |      |
| 7        | 5           |             | 571.976543                | 1712.908   | 3         |           |           |         |       | 1712.910828 | 34.89       | DLADELALVDVIEDK     |              |           |                 |                 |                   |      |
| 7        | 5           |             | 571.976626                | 1712.908   | 3         |           |           |         |       | 1712.910828 | 41.43       | DLADELALVDVIEDK     |              |           |                 |                 |                   |      |
| 7        | 5           |             | 857.4623                  | 1712.91    | 2         |           |           |         |       | 1712.910828 | 118.61      | DLADELALVDVIEDK     |              |           |                 |                 |                   |      |
| 7        | 5           |             | 857.4623                  | 1712.91    | 2         |           |           |         |       | 1712.910828 | 109.29      | DLADELALVDVIEDK     |              |           |                 |                 |                   |      |
| 7        | 5           |             | 857.4623                  | 1712.91    | 2         |           |           |         |       | 1712.910828 | 129.49      | DLADELALVDVIEDK     |              |           |                 |                 |                   |      |
| 7        | 5           |             | 857.4623                  | 1712.91    | 2         |           |           |         |       | 1712.910828 | 112.03      | DLADELALVDVIEDK     |              |           |                 |                 |                   |      |
| 7        | 5           |             | 643.027358                | 1926.06    | 3         |           |           |         |       | 1926.058533 | 30.02       | DLADELALVDVIEDKLK   |              |           |                 |                 |                   |      |
| 7        | 5           |             | 652.372299                | 1954.095   | 3         |           |           |         |       | 1954.089844 | 34.07       | DLADELALVDVIEDKLK   |              |           |                 |                 |                   |      |
| 7        | 5           |             | 652.372299                | 1954.095   | 3         |           |           |         |       | 1954.089844 | 31.42       | DLADELALVDVIEDKLK   |              |           |                 |                 |                   |      |
| 7        | 5           |             | 652.372299                | 1954.095   | 3         |           |           |         |       | 1954.089844 | 51.69       | DLADELALVDVIEDKLK   |              |           |                 |                 |                   |      |
| 7        | 5           |             | 661.71605                 | 1982.126   | 3         |           |           |         |       | 1982.121155 | 37.54       | DLADELALVDVIEDKLK   |              |           |                 |                 |                   |      |
| 7        | 5           |             | 661.71605                 | 1982.126   | 3         |           |           |         |       | 1982.121155 | 49.49       | DLADELALVDVIEDKLK   |              |           |                 |                 |                   |      |
| 7        | 5           |             | 661.716947                | 1982.129   | 3         |           |           |         |       | 1982.121155 | 58.15       | DLADELALVDVIEDKLK   |              |           |                 |                 |                   |      |
| 7        | 6           | IPI00465439 | Fructose-bisphosphate ald | 320.723756 | 639.433   | 2         | 2         | 2.41    | 0.30  | 639.434387  | 23.95       | IVAPGK              |              |           |                 |                 |                   |      |
| 7        | 6           |             |                           | 410.270323 | 818.5261  | 2         |           |         |       |             | 818.529007  | 25.64               | VLAAYYK      |           |                 |                 |                   |      |
| 7        | 6           |             |                           | 429.275369 | 856.5362  | 2         |           |         |       |             | 856.540649  | 41.79               | ALQASALK     |           |                 |                 |                   |      |

| Band num | prot_hit | nu_prot_acc | prot_desc   | pep_exp_mz                  | pep_exp_n  | pep_exp_z | quantific | average | stdev | pep_calc_mr | pep_score  | pep_seq                 | light m/z | heavy m/z | light intensity | heavy intensity | ratio light/heavy |
|----------|----------|-------------|-------------|-----------------------------|------------|-----------|-----------|---------|-------|-------------|------------|-------------------------|-----------|-----------|-----------------|-----------------|-------------------|
| 7        | 7        | 6           |             | 429.275369                  | 856.5362   | 2         |           |         |       | 856.540649  | 22.3       | ALQASALK                |           |           |                 |                 |                   |
| 7        | 7        | 6           |             | 429.275369                  | 856.5362   | 2         |           |         |       | 856.540649  | 47.72      | ALQASALK                |           |           |                 |                 |                   |
| 7        | 7        | 6           |             | 484.761262                  | 967.508    | 2         |           |         |       | 967.511139  | 51.32      | ELSDIAHR                |           |           |                 |                 |                   |
| 7        | 7        | 6           |             | 484.761262                  | 967.508    | 2         |           |         |       | 967.511139  | 47.02      | ELSDIAHR                |           |           |                 |                 |                   |
| 7        | 7        | 6           |             | 323.510245                  | 967.5089   | 3         |           |         |       | 967.511139  | 47.87      | ELSDIAHR                |           |           |                 |                 |                   |
| 7        | 7        | 6           |             | 323.510329                  | 967.5092   | 3         |           |         |       | 967.511139  | 51.09      | ELSDIAHR                |           |           |                 |                 |                   |
| 7        | 7        | 6           |             | 536.80173                   | 1071.589   | 2         |           |         |       | 1071.594879 | 54.5       | QLLLTADDR               |           |           |                 |                 |                   |
| 7        | 7        | 6           |             | 536.801749                  | 1071.589   | 2         |           |         |       | 1071.594879 | 56.81      | QLLLTADDR               |           |           |                 |                 |                   |
| 7        | 7        | 6           |             | 536.801749                  | 1071.589   | 2         |           |         |       | 1071.594879 | 49.39      | QLLLTADDR               |           |           |                 |                 |                   |
| 7        | 7        | 6           |             | 580.807409                  | 1159.6     | 2         |           |         |       | 1159.60437  | 61.85      | ALANSLACQ GK            |           |           |                 |                 |                   |
| 7        | 7        | 6           |             | 580.807409                  | 1159.6     | 2         |           |         |       | 1159.60437  | 70.66      | ALANSLACQ GK            |           |           |                 |                 |                   |
| 7        | 7        | 6           |             | 594.822706                  | 1187.631   | 2         |           |         |       | 1187.635681 | 57.62      | ALANSLACQ GK            |           |           |                 |                 |                   |
| 7        | 7        | 6           |             | 680.87003                   | 1359.726   | 2         |           |         |       | 1359.726974 | 101.54     | GILAADESTGSI AK         |           |           |                 |                 |                   |
| 7        | 7        | 6           |             | 680.870052                  | 1359.726   | 2         |           |         |       | 1359.726974 | 95.66      | GILAADESTGSI AK         |           |           |                 |                 |                   |
| 7        | 7        | 6           |             | 680.870052                  | 1359.726   | 2         |           |         |       | 1359.726974 | 97.92      | GILAADESTGSI AK         |           |           |                 |                 |                   |
| 7        | 7        | 6           |             | 694.885282                  | 1387.756   | 2         |           |         |       | 1387.758286 | 103.97     | GILAADESTGSI AK         |           |           |                 |                 |                   |
| 7        | 7        | 6           |             | 694.885282                  | 1387.756   | 2         |           |         |       | 1387.758286 | 97.38      | GILAADESTGSI AK         |           |           |                 |                 |                   |
| 7        | 7        | 6           |             | 694.885282                  | 1387.756   | 2         |           |         |       | 1387.758286 | 87.9       | GILAADESTGSI AK         |           |           |                 |                 |                   |
| 7        | 7        | 6           |             | 558.950481                  | 1673.83    | 3         |           |         |       | 1673.835693 | 37.4       | LQSIGTENTEENRR          |           |           |                 |                 |                   |
| 7        | 7        | 6           |             | 558.950482                  | 1673.83    | 3         |           |         |       | 1673.835693 | 34.32      | LQSIGTENTEENRR          |           |           |                 |                 |                   |
| 7        | 7        | 6           |             | 558.95087                   | 1673.831   | 3         |           |         |       | 1673.835693 | 36.57      | LQSIGTENTEENRR          |           |           |                 |                 |                   |
| 7        | 7        | 6           |             | 558.950981                  | 1673.831   | 3         |           |         |       | 1673.835693 | 39.03      | LQSIGTENTEENRR          |           |           |                 |                 |                   |
| 7        | 7        | 6           |             | 837.925494                  | 1673.836   | 2         |           |         |       | 1673.835693 | 48.92      | LQSIGTENTEENRR          |           |           |                 |                 |                   |
| 7        | 7        | 6           |             | 837.925494                  | 1673.836   | 2         |           |         |       | 1673.835693 | 55.88      | LQSIGTENTEENRR          |           |           |                 |                 |                   |
| 7        | 7        | 6           |             | 852.443885                  | 1702.873   | 2         |           |         |       | 1702.873657 | 60.39      | FSHEEIAMATV TALR        | 852.4439  | 854.4564  | 3.39            | 1.29            | 2.63              |
| 7        | 7        | 6           |             | 852.443885                  | 1702.873   | 2         |           |         |       | 1702.873657 | 66.07      | FSHEEIAMATV TALR        |           |           |                 |                 |                   |
| 7        | 7        | 6           |             | 860.443131                  | 1718.872   | 2         |           |         |       | 1718.868576 | 46.69      | FSHEEIAMATV TALR        |           |           |                 |                 |                   |
| 7        | 7        | 6           |             | 860.443131                  | 1718.872   | 2         |           |         |       | 1718.868576 | 54.55      | FSHEEIAMATV TALR        |           |           |                 |                 |                   |
| 7        | 7        | 6           |             | 610.986106                  | 1829.936   | 3         |           |         |       | 1829.936798 | 22.15      | RLQSIGTENTEENRR         |           |           |                 |                 |                   |
| 7        | 7        | 6           |             | 610.986106                  | 1829.936   | 3         |           |         |       | 1829.936798 | 22.86      | RLQSIGTENTEENRR         |           |           |                 |                 |                   |
| 7        | 7        | 6           |             | 712.384111                  | 2134.131   | 3         |           |         |       | 2134.122864 | 60.56      | IGEHTPSALAIMENANVLAR    |           |           |                 |                 |                   |
| 7        | 7        | 6           |             | 712.384111                  | 2134.131   | 3         |           |         |       | 2134.122864 | 60.06      | IGEHTPSALAIMENANVLAR    |           |           |                 |                 |                   |
| 7        | 7        | 6           |             | 712.384199                  | 2134.131   | 3         |           |         |       | 2134.122864 | 62.94      | IGEHTPSALAIMENANVLAR    |           |           |                 |                 |                   |
| 7        | 7        | 6           |             | 1128.53431                  | 2255.054   | 2         |           |         |       | 2255.051865 | 112.26     | YTPSQGAGAAAASESLFVSNHAY | 1128.534  | 1130.547  | 5.31            | 2.41            | 2.20              |
| 7        | 7        | 6           |             | 1128.53431                  | 2255.054   | 2         |           |         |       | 2255.051865 | 130.38     | YTPSQGAGAAAASESLFVSNHAY |           |           |                 |                 |                   |
| 7        | 7        | 6           |             | 1128.53431                  | 2255.054   | 2         |           |         |       | 2255.051865 | 149.55     | YTPSQGAGAAAASESLFVSNHAY |           |           |                 |                 |                   |
| 7        | 7        | 6           |             | 1150.5915                   | 2299.168   | 2         |           |         |       | 2299.167953 | 87.3       | GVVPLAGTNGETTTQGLDGLSER |           |           |                 |                 |                   |
| 7        | 7        | 7           | IPI00021428 | Actin, alpha skeletal muscl | 336.70552  | 671.3965  | 2         | 3       | 1.94  | 0.39        | 671.399063 | 35.17                   | LDLAGR    |           |                 |                 |                   |
| 7        | 7        | 7           |             |                             | 336.705623 | 671.3967  | 2         |         |       | 671.399063  | 25.29      | LDLAGR                  |           |           |                 |                 |                   |
| 7        | 7        | 7           |             |                             | 336.735803 | 671.4571  | 2         |         |       | 671.460602  | 28.21      | GILTLK                  |           |           |                 |                 |                   |
| 7        | 7        | 7           |             |                             | 350.751815 | 699.4891  | 2         |         |       | 699.491913  | 41.77      | GILTLK                  |           |           |                 |                 |                   |
| 7        | 7        | 7           |             |                             | 350.751815 | 699.4891  | 2         |         |       | 699.491913  | 37.71      | GILTLK                  |           |           |                 |                 |                   |
| 7        | 7        | 7           |             |                             | 412.255116 | 822.4957  | 2         |         |       | 822.498779  | 26.16      | IIAPPER                 |           |           |                 |                 |                   |
| 7        | 7        | 7           |             |                             | 412.255116 | 822.4957  | 2         |         |       | 822.498779  | 29.61      | IIAPPER                 |           |           |                 |                 |                   |
| 7        | 7        | 7           |             |                             | 412.255116 | 822.4957  | 2         |         |       | 822.498779  | 29.63      | IIAPPER                 |           |           |                 |                 |                   |
| 7        | 7        | 7           |             |                             | 412.255126 | 822.4957  | 2         |         |       | 822.498779  | 29.54      | IIAPPER                 |           |           |                 |                 |                   |
| 7        | 7        | 7           |             |                             | 412.255128 | 822.4957  | 2         |         |       | 822.498779  | 28.84      | IIAPPER                 |           |           |                 |                 |                   |
| 7        | 7        | 7           |             |                             | 412.255223 | 822.4959  | 2         |         |       | 822.498779  | 28.92      | IIAPPER                 |           |           |                 |                 |                   |
| 7        | 7        | 7           |             |                             | 412.255226 | 822.4959  | 2         |         |       | 822.498779  | 25.75      | IIAPPER                 |           |           |                 |                 |                   |
| 7        | 7        | 7           |             |                             | 502.742677 | 1003.471  | 2         |         |       | 1003.474731 | 55.32      | AGFAGDDAPR              |           |           |                 |                 |                   |
| 7        | 7        | 7           |             |                             | 502.742678 | 1003.471  | 2         |         |       | 1003.474731 | 65.25      | AGFAGDDAPR              | 502.7446  | 504.7572  | 9.34            | 5.12            | 1.82              |
| 7        | 7        | 7           |             |                             | 502.742943 | 1003.471  | 2         |         |       | 1003.474731 | 64.4       | AGFAGDDAPR              |           |           |                 |                 |                   |
| 7        | 7        | 7           |             |                             | 502.74314  | 1003.472  | 2         |         |       | 1003.474731 | 64.34      | AGFAGDDAPR              |           |           |                 |                 |                   |
| 7        | 7        | 7           |             |                             | 502.743307 | 1003.472  | 2         |         |       | 1003.474731 | 65.81      | AGFAGDDAPR              |           |           |                 |                 |                   |
| 7        | 7        | 7           |             |                             | 502.743388 | 1003.472  | 2         |         |       | 1003.474731 | 54.99      | AGFAGDDAPR              |           |           |                 |                 |                   |
| 7        | 7        | 7           |             |                             | 513.763453 | 1025.512  | 2         |         |       | 1025.512787 | 32.05      | DLTDYLMK                |           |           |                 |                 |                   |
| 7        | 7        | 7           |             |                             | 513.763453 | 1025.512  | 2         |         |       | 1025.512787 | 34.04      | DLTDYLMK                |           |           |                 |                 |                   |
| 7        | 7        | 7           |             |                             | 521.758892 | 1041.503  | 2         |         |       | 1041.507706 | 34.55      | DLTDYLMK                |           |           |                 |                 |                   |
| 7        | 7        | 7           |             |                             | 527.779134 | 1053.544  | 2         |         |       | 1053.544098 | 49.46      | DLTDYLMK                |           |           |                 |                 |                   |
| 7        | 7        | 7           |             |                             | 527.779139 | 1053.544  | 2         |         |       | 1053.544098 | 54.58      | DLTDYLMK                |           |           |                 |                 |                   |
| 7        | 7        | 7           |             |                             | 527.779139 | 1053.544  | 2         |         |       | 1053.544098 | 53.34      | DLTDYLMK                |           |           |                 |                 |                   |
| 7        | 7        | 7           |             |                             | 535.774983 | 1069.535  | 2         |         |       | 1069.539017 | 50.51      | DLTDYLMK                |           |           |                 |                 |                   |
| 7        | 7        | 7           |             |                             | 595.327527 | 1188.641  | 2         |         |       | 1188.644852 | 50.76      | EITALAPSTMK             |           |           |                 |                 |                   |



| Band num | prot_hit | nu_prot_acc | prot_desc            | pep_exp_mz | pep_exp_n | pep_exp_z | quantific | average | stdev | pep_calc_mr | pep_score | pep_seq          | light m/z | heavy m/z | light intensity | heavy intensity | ratio light/heavy |
|----------|----------|-------------|----------------------|------------|-----------|-----------|-----------|---------|-------|-------------|-----------|------------------|-----------|-----------|-----------------|-----------------|-------------------|
| 7        | 7        |             |                      | 595.327528 | 1188.641  | 2         |           |         |       | 1188.644852 | 51.73     | EITALAPSTMK      |           |           |                 |                 |                   |
| 7        | 7        |             |                      | 595.327528 | 1188.641  | 2         |           |         |       | 1188.644852 | 55.8      | EITALAPSTMK      |           |           |                 |                 |                   |
| 7        | 7        |             |                      | 600.305442 | 1198.596  | 2         |           |         |       | 1198.597488 | 56.36     | HQGVMMVGMGQK     |           |           |                 |                 |                   |
| 7        | 7        |             |                      | 600.305442 | 1198.596  | 2         |           |         |       | 1198.597488 | 52.82     | HQGVMMVGMGQK     |           |           |                 |                 |                   |
| 7        | 7        |             |                      | 603.325025 | 1204.635  | 2         |           |         |       | 1204.639771 | 34.31     | EITALAPSTMK      |           |           |                 |                 |                   |
| 7        | 7        |             |                      | 603.325025 | 1204.635  | 2         |           |         |       | 1204.639771 | 38.83     | EITALAPSTMK      |           |           |                 |                 |                   |
| 7        | 7        |             |                      | 603.325025 | 1204.635  | 2         |           |         |       | 1204.639771 | 36.58     | EITALAPSTMK      |           |           |                 |                 |                   |
| 7        | 7        |             |                      | 609.343776 | 1216.673  | 2         |           |         |       | 1216.676163 | 46.72     | EITALAPSTMK      |           |           |                 |                 |                   |
| 7        | 7        |             |                      | 609.343776 | 1216.673  | 2         |           |         |       | 1216.676163 | 58.53     | EITALAPSTMK      |           |           |                 |                 |                   |
| 7        | 7        |             |                      | 609.343776 | 1216.673  | 2         |           |         |       | 1216.676163 | 43.98     | EITALAPSTMK      |           |           |                 |                 |                   |
| 7        | 7        |             |                      | 609.343778 | 1216.673  | 2         |           |         |       | 1216.676163 | 34.54     | EITALAPSTMK      |           |           |                 |                 |                   |
| 7        | 7        |             |                      | 613.87198  | 1225.729  | 2         |           |         |       | 1225.731934 | 63.02     | AVFPSIVGRPR      | 613.8732  | 615.8858  | 4080000         | 1710000         | 2.39              |
| 7        | 7        |             |                      | 613.872039 | 1225.73   | 2         |           |         |       | 1225.731934 | 41.57     | AVFPSIVGRPR      |           |           |                 |                 |                   |
| 7        | 7        |             |                      | 409.583952 | 1225.73   | 3         |           |         |       | 1225.731934 | 39.46     | AVFPSIVGRPR      |           |           |                 |                 |                   |
| 7        | 7        |             |                      | 409.583967 | 1225.73   | 3         |           |         |       | 1225.731934 | 43.03     | AVFPSIVGRPR      |           |           |                 |                 |                   |
| 7        | 7        |             |                      | 409.583993 | 1225.73   | 3         |           |         |       | 1225.731934 | 42.38     | AVFPSIVGRPR      |           |           |                 |                 |                   |
| 7        | 7        |             |                      | 409.882652 | 1226.626  | 3         |           |         |       | 1226.628799 | 20.73     | HQGVMMVGMGQK     |           |           |                 |                 |                   |
| 7        | 7        |             |                      | 614.320375 | 1226.626  | 2         |           |         |       | 1226.628799 | 40.93     | HQGVMMVGMGQK     |           |           |                 |                 |                   |
| 7        | 7        |             |                      | 614.320375 | 1226.626  | 2         |           |         |       | 1226.628799 | 46.43     | HQGVMMVGMGQK     |           |           |                 |                 |                   |
| 7        | 7        |             |                      | 614.320505 | 1226.626  | 2         |           |         |       | 1226.628799 | 44.17     | HQGVMMVGMGQK     |           |           |                 |                 |                   |
| 7        | 7        |             |                      | 409.882849 | 1226.627  | 3         |           |         |       | 1226.628799 | 34.26     | HQGVMMVGMGQK     |           |           |                 |                 |                   |
| 7        | 7        |             |                      | 617.340293 | 1232.666  | 2         |           |         |       | 1232.671082 | 46.93     | EITALAPSTMK      |           |           |                 |                 |                   |
| 7        | 7        |             |                      | 617.340293 | 1232.666  | 2         |           |         |       | 1232.671082 | 47.14     | EITALAPSTMK      |           |           |                 |                 |                   |
| 7        | 7        |             |                      | 627.796391 | 1253.578  | 2         |           |         |       | 1253.580002 | 42.75     | DSYVGEAQS        |           |           |                 |                 |                   |
| 7        | 7        |             |                      | 515.263324 | 1542.768  | 3         |           |         |       | 1542.77562  | 40.5      | IWHHTFYNELR      |           |           |                 |                 |                   |
| 7        | 7        |             |                      | 515.263324 | 1542.768  | 3         |           |         |       | 1542.77562  | 31.76     | IWHHTFYNELR      |           |           |                 |                 |                   |
| 7        | 7        |             |                      | 515.263384 | 1542.768  | 3         |           |         |       | 1542.77562  | 44.54     | IWHHTFYNELR      |           |           |                 |                 |                   |
| 7        | 7        |             |                      | 909.970386 | 1817.926  | 2         |           |         |       | 1817.91835  | 100.15    | SYELPDGQVITIGNER |           |           |                 |                 |                   |
| 7        | 7        |             |                      | 909.970386 | 1817.926  | 2         |           |         |       | 1817.91835  | 123.45    | SYELPDGQVITIGNER |           |           |                 |                 |                   |
| 7        | 7        |             |                      | 909.970386 | 1817.926  | 2         |           |         |       | 1817.91835  | 123.92    | SYELPDGQVITIGNER |           |           |                 |                 |                   |
| 7        | 7        |             |                      | 909.970386 | 1817.926  | 2         |           |         |       | 1817.91835  | 104.25    | SYELPDGQVITIGNER | 909.9665  | 911.979   | 10900000        | 6710000         | 1.62              |
| 7        | 7        |             |                      | 909.970415 | 1817.926  | 2         |           |         |       | 1817.91835  | 50.48     | SYELPDGQVITIGNER |           |           |                 |                 |                   |
| 7        | 7        |             |                      | 663.652956 | 1987.937  | 3         |           |         |       | 1987.937393 | 26.68     | YPIEHGIITNWDDMEK |           |           |                 |                 |                   |
| 7        | 7        |             |                      | 663.653017 | 1987.937  | 3         |           |         |       | 1987.937393 | 40.76     | YPIEHGIITNWDDMEK |           |           |                 |                 |                   |
| 7        | 7        |             |                      | 663.653019 | 1987.937  | 3         |           |         |       | 1987.937393 | 22.45     | YPIEHGIITNWDDMEK |           |           |                 |                 |                   |
| 7        | 7        |             |                      | 994.976836 | 1987.939  | 2         |           |         |       | 1987.937393 | 42.96     | YPIEHGIITNWDDMEK |           |           |                 |                 |                   |
| 7        | 7        |             |                      | 994.976836 | 1987.939  | 2         |           |         |       | 1987.937393 | 29.26     | YPIEHGIITNWDDMEK |           |           |                 |                 |                   |
| 7        | 7        |             |                      | 994.976998 | 1987.939  | 2         |           |         |       | 1987.937393 | 27.38     | YPIEHGIITNWDDMEK |           |           |                 |                 |                   |
| 7        | 7        |             |                      | 672.996613 | 2015.968  | 3         |           |         |       | 2015.968704 | 21.91     | YPIEHGIITNWDDMEK |           |           |                 |                 |                   |
| 7        | 7        | IPI00023006 | Actin, alpha cardiac | 1008.99309 | 2015.972  | 2         | 3         | 1.94    | 0.39  | 2015.968704 | 45.19     | YPIEHGIITNWDDMEK |           |           |                 |                 |                   |
| 7        | 7        |             |                      | 336.70552  | 671.3967  | 2         |           |         |       | 671.399063  | 35.17     | LDLAGR           |           |           |                 |                 |                   |
| 7        | 7        |             |                      | 336.705623 | 671.3967  | 2         |           |         |       | 671.399063  | 25.29     | LDLAGR           |           |           |                 |                 |                   |
| 7        | 7        |             |                      | 336.735803 | 671.4571  | 2         |           |         |       | 671.460602  | 28.21     | GILTLK           |           |           |                 |                 |                   |
| 7        | 7        |             |                      | 350.751815 | 699.4891  | 2         |           |         |       | 699.491913  | 41.77     | GILTLK           |           |           |                 |                 |                   |
| 7        | 7        |             |                      | 350.751815 | 699.4891  | 2         |           |         |       | 699.491913  | 37.71     | GILTLK           |           |           |                 |                 |                   |
| 7        | 7        |             |                      | 412.255116 | 822.4957  | 2         |           |         |       | 822.498779  | 26.16     | IIAPPER          |           |           |                 |                 |                   |
| 7        | 7        |             |                      | 412.255116 | 822.4957  | 2         |           |         |       | 822.498779  | 29.61     | IIAPPER          |           |           |                 |                 |                   |
| 7        | 7        |             |                      | 412.255116 | 822.4957  | 2         |           |         |       | 822.498779  | 29.63     | IIAPPER          |           |           |                 |                 |                   |
| 7        | 7        |             |                      | 412.255126 | 822.4957  | 2         |           |         |       | 822.498779  | 29.54     | IIAPPER          |           |           |                 |                 |                   |
| 7        | 7        |             |                      | 412.255128 | 822.4957  | 2         |           |         |       | 822.498779  | 28.84     | IIAPPER          |           |           |                 |                 |                   |
| 7        | 7        |             |                      | 412.255223 | 822.4959  | 2         |           |         |       | 822.498779  | 28.92     | IIAPPER          |           |           |                 |                 |                   |
| 7        | 7        |             |                      | 412.255226 | 822.4959  | 2         |           |         |       | 822.498779  | 25.75     | IIAPPER          |           |           |                 |                 |                   |
| 7        | 7        |             |                      | 502.742677 | 1003.471  | 2         |           |         |       | 1003.474731 | 55.32     | AGFAGDDAPR       |           |           |                 |                 |                   |
| 7        | 7        |             |                      | 502.742678 | 1003.471  | 2         |           |         |       | 1003.474731 | 65.25     | AGFAGDDAPR       |           |           |                 |                 |                   |
| 7        | 7        |             |                      | 502.742943 | 1003.471  | 2         |           |         |       | 1003.474731 | 64.4      | AGFAGDDAPR       |           |           |                 |                 |                   |
| 7        | 7        |             |                      | 502.74314  | 1003.472  | 2         |           |         |       | 1003.474731 | 64.34     | AGFAGDDAPR       |           |           |                 |                 |                   |
| 7        | 7        |             |                      | 502.743307 | 1003.472  | 2         |           |         |       | 1003.474731 | 65.81     | AGFAGDDAPR       |           |           |                 |                 |                   |
| 7        | 7        |             |                      | 502.743388 | 1003.472  | 2         |           |         |       | 1003.474731 | 54.99     | AGFAGDDAPR       |           |           |                 |                 |                   |
| 7        | 7        |             |                      | 513.763453 | 1025.512  | 2         |           |         |       | 1025.512787 | 32.05     | DLTDYLMK         |           |           |                 |                 |                   |
| 7        | 7        |             |                      | 513.763453 | 1025.512  | 2         |           |         |       | 1025.512787 | 34.04     | DLTDYLMK         |           |           |                 |                 |                   |
| 7        | 7        |             |                      | 521.758892 | 1041.503  | 2         |           |         |       | 1041.507706 | 34.55     | DLTDYLMK         |           |           |                 |                 |                   |
| 7        | 7        |             |                      | 527.779134 | 1053.544  | 2         |           |         |       | 1053.544098 | 49.46     | DLTDYLMK         |           |           |                 |                 |                   |
| 7        | 7        |             |                      | 527.779139 | 1053.544  | 2         |           |         |       | 1053.544098 | 54.58     | DLTDYLMK         |           |           |                 |                 |                   |

| Band num | prot_hit | nu          | prot_acc | prot_desc                | pep_exp_mz | pep_exp_n | pep_exp_z | quantific | average | stdev | pep_calc_mr | pep_score | pep_seq          | light m/z | heavy m/z | light intensity | heavy intensity | ratio light/heavy |
|----------|----------|-------------|----------|--------------------------|------------|-----------|-----------|-----------|---------|-------|-------------|-----------|------------------|-----------|-----------|-----------------|-----------------|-------------------|
| 7        | 7        |             |          |                          | 527.779139 | 1053.544  | 2         |           |         |       | 1053.544098 | 53.34     | DLTDYLMK         |           |           |                 |                 |                   |
| 7        | 7        |             |          |                          | 535.774983 | 1069.535  | 2         |           |         |       | 1069.539017 | 50.51     | DLTDYLMK         |           |           |                 |                 |                   |
| 7        | 7        |             |          |                          | 595.327527 | 1188.641  | 2         |           |         |       | 1188.644852 | 50.76     | EITALAPSTMK      |           |           |                 |                 |                   |
| 7        | 7        |             |          |                          | 595.327528 | 1188.641  | 2         |           |         |       | 1188.644852 | 51.73     | EITALAPSTMK      |           |           |                 |                 |                   |
| 7        | 7        |             |          |                          | 595.327528 | 1188.641  | 2         |           |         |       | 1188.644852 | 55.8      | EITALAPSTMK      |           |           |                 |                 |                   |
| 7        | 7        |             |          |                          | 600.305442 | 1198.596  | 2         |           |         |       | 1198.597488 | 56.36     | HQGVMMVGMGQK     |           |           |                 |                 |                   |
| 7        | 7        |             |          |                          | 600.305442 | 1198.596  | 2         |           |         |       | 1198.597488 | 52.82     | HQGVMMVGMGQK     |           |           |                 |                 |                   |
| 7        | 7        |             |          |                          | 603.325025 | 1204.635  | 2         |           |         |       | 1204.639771 | 34.31     | EITALAPSTMK      |           |           |                 |                 |                   |
| 7        | 7        |             |          |                          | 603.325025 | 1204.635  | 2         |           |         |       | 1204.639771 | 38.83     | EITALAPSTMK      |           |           |                 |                 |                   |
| 7        | 7        |             |          |                          | 603.325025 | 1204.635  | 2         |           |         |       | 1204.639771 | 36.58     | EITALAPSTMK      |           |           |                 |                 |                   |
| 7        | 7        |             |          |                          | 609.343776 | 1216.673  | 2         |           |         |       | 1216.676163 | 46.72     | EITALAPSTMK      |           |           |                 |                 |                   |
| 7        | 7        |             |          |                          | 609.343776 | 1216.673  | 2         |           |         |       | 1216.676163 | 58.53     | EITALAPSTMK      |           |           |                 |                 |                   |
| 7        | 7        |             |          |                          | 609.343776 | 1216.673  | 2         |           |         |       | 1216.676163 | 43.98     | EITALAPSTMK      |           |           |                 |                 |                   |
| 7        | 7        |             |          |                          | 609.343778 | 1216.673  | 2         |           |         |       | 1216.676163 | 34.54     | EITALAPSTMK      |           |           |                 |                 |                   |
| 7        | 7        |             |          |                          | 613.87198  | 1225.729  | 2         |           |         |       | 1225.731934 | 63.02     | AVFPSIVGRPR      |           |           |                 |                 |                   |
| 7        | 7        |             |          |                          | 613.872039 | 1225.73   | 2         |           |         |       | 1225.731934 | 41.57     | AVFPSIVGRPR      |           |           |                 |                 |                   |
| 7        | 7        |             |          |                          | 409.583952 | 1225.73   | 3         |           |         |       | 1225.731934 | 39.46     | AVFPSIVGRPR      |           |           |                 |                 |                   |
| 7        | 7        |             |          |                          | 409.583967 | 1225.73   | 3         |           |         |       | 1225.731934 | 43.03     | AVFPSIVGRPR      |           |           |                 |                 |                   |
| 7        | 7        |             |          |                          | 409.583993 | 1225.73   | 3         |           |         |       | 1225.731934 | 42.38     | AVFPSIVGRPR      |           |           |                 |                 |                   |
| 7        | 7        |             |          |                          | 409.882652 | 1226.626  | 3         |           |         |       | 1226.628799 | 20.73     | HQGVMMVGMGQK     |           |           |                 |                 |                   |
| 7        | 7        |             |          |                          | 614.320375 | 1226.626  | 2         |           |         |       | 1226.628799 | 40.93     | HQGVMMVGMGQK     |           |           |                 |                 |                   |
| 7        | 7        |             |          |                          | 614.320375 | 1226.626  | 2         |           |         |       | 1226.628799 | 46.43     | HQGVMMVGMGQK     |           |           |                 |                 |                   |
| 7        | 7        |             |          |                          | 614.320505 | 1226.626  | 2         |           |         |       | 1226.628799 | 44.17     | HQGVMMVGMGQK     |           |           |                 |                 |                   |
| 7        | 7        |             |          |                          | 409.882849 | 1226.627  | 3         |           |         |       | 1226.628799 | 34.26     | HQGVMMVGMGQK     |           |           |                 |                 |                   |
| 7        | 7        |             |          |                          | 617.340293 | 1232.666  | 2         |           |         |       | 1232.671082 | 46.93     | EITALAPSTMK      |           |           |                 |                 |                   |
| 7        | 7        |             |          |                          | 617.340293 | 1232.666  | 2         |           |         |       | 1232.671082 | 47.14     | EITALAPSTMK      |           |           |                 |                 |                   |
| 7        | 7        |             |          |                          | 627.796391 | 1253.578  | 2         |           |         |       | 1253.580002 | 42.75     | DSYVGDEAQS       |           |           |                 |                 |                   |
| 7        | 7        |             |          |                          | 515.263324 | 1542.768  | 3         |           |         |       | 1542.77562  | 40.5      | IWHHTFYNELR      |           |           |                 |                 |                   |
| 7        | 7        |             |          |                          | 515.263324 | 1542.768  | 3         |           |         |       | 1542.77562  | 31.76     | IWHHTFYNELR      |           |           |                 |                 |                   |
| 7        | 7        |             |          |                          | 515.263384 | 1542.768  | 3         |           |         |       | 1542.77562  | 44.54     | IWHHTFYNELR      |           |           |                 |                 |                   |
| 7        | 7        |             |          |                          | 909.970386 | 1817.926  | 2         |           |         |       | 1817.91835  | 100.15    | SYELPDGQVITIGNER |           |           |                 |                 |                   |
| 7        | 7        |             |          |                          | 909.970386 | 1817.926  | 2         |           |         |       | 1817.91835  | 123.45    | SYELPDGQVITIGNER |           |           |                 |                 |                   |
| 7        | 7        |             |          |                          | 909.970386 | 1817.926  | 2         |           |         |       | 1817.91835  | 123.92    | SYELPDGQVITIGNER |           |           |                 |                 |                   |
| 7        | 7        |             |          |                          | 909.970386 | 1817.926  | 2         |           |         |       | 1817.91835  | 104.25    | SYELPDGQVITIGNER |           |           |                 |                 |                   |
| 7        | 7        |             |          |                          | 909.970415 | 1817.926  | 2         |           |         |       | 1817.91835  | 50.48     | SYELPDGQVITIGNER |           |           |                 |                 |                   |
| 7        | 7        |             |          |                          | 663.652956 | 1987.937  | 3         |           |         |       | 1987.937393 | 26.68     | YPIEHGIITNWDDMEK |           |           |                 |                 |                   |
| 7        | 7        |             |          |                          | 663.653017 | 1987.937  | 3         |           |         |       | 1987.937393 | 40.76     | YPIEHGIITNWDDMEK |           |           |                 |                 |                   |
| 7        | 7        |             |          |                          | 663.653019 | 1987.937  | 3         |           |         |       | 1987.937393 | 22.45     | YPIEHGIITNWDDMEK |           |           |                 |                 |                   |
| 7        | 7        |             |          |                          | 994.976836 | 1987.939  | 2         |           |         |       | 1987.937393 | 42.96     | YPIEHGIITNWDDMEK |           |           |                 |                 |                   |
| 7        | 7        |             |          |                          | 994.976836 | 1987.939  | 2         |           |         |       | 1987.937393 | 29.26     | YPIEHGIITNWDDMEK |           |           |                 |                 |                   |
| 7        | 7        |             |          |                          | 994.976998 | 1987.939  | 2         |           |         |       | 1987.937393 | 27.38     | YPIEHGIITNWDDMEK |           |           |                 |                 |                   |
| 7        | 7        |             |          |                          | 672.996613 | 2015.968  | 3         |           |         |       | 2015.968704 | 21.91     | YPIEHGIITNWDDMEK |           |           |                 |                 |                   |
| 7        | 7        |             |          |                          | 1008.99309 | 2015.972  | 2         |           |         |       | 2015.968704 | 45.19     | YPIEHGIITNWDDMEK |           |           |                 |                 |                   |
| 7        | 8        | IPI00216318 |          | tyrosine 3-monooxygenase | 468.280323 | 934.5461  | 2         | 2         | 2.70    | 0.66  | 934.551193  | 33.66     | NLLSVAYK         |           |           |                 |                 |                   |
| 7        | 8        |             |          |                          | 480.292525 | 958.5705  | 2         |           |         |       | 958.572342  | 55.27     | VISSIEQK         |           |           |                 |                 |                   |
| 7        | 8        |             |          |                          | 480.292536 | 958.5705  | 2         |           |         |       | 958.572342  | 24.72     | VISSIEQK         |           |           |                 |                 |                   |
| 7        | 8        |             |          |                          | 482.2962   | 962.5778  | 2         |           |         |       | 962.582504  | 25.14     | NLLSVAYK         |           |           |                 |                 |                   |
| 7        | 8        |             |          |                          | 482.2962   | 962.5778  | 2         |           |         |       | 962.582504  | 25.76     | NLLSVAYK         |           |           |                 |                 |                   |
| 7        | 8        |             |          |                          | 568.79811  | 1135.582  | 2         |           |         |       | 1135.583267 | 59.07     | EMQPTHPIR        |           |           |                 |                 |                   |
| 7        | 8        |             |          |                          | 568.798476 | 1135.582  | 2         |           |         |       | 1135.583267 | 45.95     | EMQPTHPIR        |           |           |                 |                 |                   |
| 7        | 8        |             |          |                          | 379.535145 | 1135.584  | 3         |           |         |       | 1135.583267 | 38.54     | EMQPTHPIR        |           |           |                 |                 |                   |
| 7        | 8        |             |          |                          | 379.535507 | 1135.585  | 3         |           |         |       | 1135.583267 | 35.48     | EMQPTHPIR        |           |           |                 |                 |                   |
| 7        | 8        |             |          |                          | 609.350927 | 1216.687  | 2         |           |         |       | 1216.687393 | 80.79     | DSTLIMQLLR       |           |           |                 |                 |                   |
| 7        | 8        |             |          |                          | 609.350927 | 1216.687  | 2         |           |         |       | 1216.687393 | 75.96     | DSTLIMQLLR       |           |           |                 |                 |                   |
| 7        | 8        |             |          |                          | 609.351507 | 1216.688  | 2         |           |         |       | 1216.687393 | 80.5      | DSTLIMQLLR       |           |           |                 |                 |                   |
| 7        | 8        |             |          |                          | 609.351507 | 1216.688  | 2         |           |         |       | 1216.687393 | 85.72     | DSTLIMQLLR       |           |           |                 |                 |                   |
| 7        | 8        |             |          |                          | 609.3516   | 1216.689  | 2         |           |         |       | 1216.687393 | 88.41     | DSTLIMQLLR       |           |           |                 |                 |                   |
| 7        | 8        |             |          |                          | 609.351771 | 1216.689  | 2         |           |         |       | 1216.687393 | 88.55     | DSTLIMQLLR       |           |           |                 |                 |                   |
| 7        | 8        |             |          |                          | 617.348426 | 1232.682  | 2         |           |         |       | 1232.682312 | 74.9      | DSTLIMQLLR       |           |           |                 |                 |                   |
| 7        | 8        |             |          |                          | 617.348426 | 1232.682  | 2         |           |         |       | 1232.682312 | 77.05     | DSTLIMQLLR       |           |           |                 |                 |                   |
| 7        | 8        |             |          |                          | 617.348487 | 1232.682  | 2         |           |         |       | 1232.682312 | 74.53     | DSTLIMQLLR       |           |           |                 |                 |                   |
| 7        | 8        |             |          |                          | 617.348563 | 1232.683  | 2         |           |         |       | 1232.682312 | 77.13     | DSTLIMQLLR       |           |           |                 |                 |                   |
| 7        | 8        |             |          |                          | 617.348563 | 1232.683  | 2         |           |         |       | 1232.682312 | 59.79     | DSTLIMQLLR       |           |           |                 |                 |                   |

| Band num | prot_hit_nu | prot_acc    | prot_desc                   | pep_exp_mz | pep_exp_n | pep_exp_z | quantific | average | stdev | pep_calc_mr | pep_score | pep_seq            | light m/z | heavy m/z | light intensity | heavy intensity | ratio light/heavy |
|----------|-------------|-------------|-----------------------------|------------|-----------|-----------|-----------|---------|-------|-------------|-----------|--------------------|-----------|-----------|-----------------|-----------------|-------------------|
| 7        | 8           |             |                             | 617.348563 | 1232.683  | 2         |           |         |       | 1232.682312 | 33.56     | DSTLMQLLR          |           |           |                 |                 |                   |
| 7        | 8           |             |                             | 617.348563 | 1232.683  | 2         |           |         |       | 1232.682312 | 74.86     | DSTLMQLLR          |           |           |                 |                 |                   |
| 7        | 8           |             |                             | 617.348563 | 1232.683  | 2         |           |         |       | 1232.682312 | 70.49     | DSTLMQLLR          |           |           |                 |                 |                   |
| 7        | 8           |             |                             | 619.817248 | 1237.62   | 2         |           |         |       | 1237.62146  | 27.14     | YLSEVAGDKNK        |           |           |                 |                 |                   |
| 7        | 8           |             |                             | 708.89147  | 1415.768  | 2         |           |         |       | 1415.768478 | 36.14     | YLIPNATQPESK       |           |           |                 |                 |                   |
| 7        | 8           |             |                             | 542.928096 | 1625.762  | 3         |           |         |       | 1625.766937 | 58.39     | AVTEQGHELSNEER     |           |           |                 |                 |                   |
| 7        | 8           |             |                             | 542.928232 | 1625.763  | 3         |           |         |       | 1625.766937 | 75.65     | AVTEQGHELSNEER     |           |           |                 |                 |                   |
| 7        | 8           |             |                             | 542.928514 | 1625.764  | 3         |           |         |       | 1625.766937 | 32.6      | AVTEQGHELSNEER     |           |           |                 |                 |                   |
| 7        | 8           |             |                             | 542.928514 | 1625.764  | 3         |           |         |       | 1625.766937 | 49.43     | AVTEQGHELSNEER     |           |           |                 |                 |                   |
| 7        | 8           |             |                             | 813.891113 | 1625.768  | 2         |           |         |       | 1625.766937 | 117.18    | AVTEQGHELSNEER     | 813.8911  | 815.9037  | 13.5            | 6.04            | 2.24              |
| 7        | 8           |             |                             | 813.891113 | 1625.768  | 2         |           |         |       | 1625.766937 | 106.86    | AVTEQGHELSNEER     |           |           |                 |                 |                   |
| 7        | 8           |             |                             | 813.891113 | 1625.768  | 2         |           |         |       | 1625.766937 | 114.14    | AVTEQGHELSNEER     |           |           |                 |                 |                   |
| 7        | 8           |             |                             | 813.891113 | 1625.768  | 2         |           |         |       | 1625.766937 | 114.12    | AVTEQGHELSNEER     |           |           |                 |                 |                   |
| 7        | 8           |             |                             | 1079.55347 | 2157.092  | 2         |           |         |       | 2157.08992  | 50.45     | IEAELQDICNDVLELLDK | 1079.553  | 1081.566  | 2.22            | 0.7             | 3.17              |
| 7        | 8           |             |                             | 1079.55347 | 2157.092  | 2         |           |         |       | 2157.08992  | 65.62     | IEAELQDICNDVLELLDK |           |           |                 |                 |                   |
| 7        | 8           | IPI00759832 | Isoform Short of 14-3-3 prc | 468.280323 | 934.5461  | 2         | 2         | 2.70    | 0.66  | 934.551193  | 33.66     | NLLSVAYK           |           |           |                 |                 |                   |
| 7        | 8           |             |                             | 480.292525 | 958.5705  | 2         |           |         |       | 958.572342  | 55.27     | VISSIEQK           |           |           |                 |                 |                   |
| 7        | 8           |             |                             | 480.292536 | 958.5705  | 2         |           |         |       | 958.572342  | 24.72     | VISSIEQK           |           |           |                 |                 |                   |
| 7        | 8           |             |                             | 482.2962   | 962.5778  | 2         |           |         |       | 962.582504  | 25.14     | NLLSVAYK           |           |           |                 |                 |                   |
| 7        | 8           |             |                             | 482.2962   | 962.5778  | 2         |           |         |       | 962.582504  | 25.76     | NLLSVAYK           |           |           |                 |                 |                   |
| 7        | 8           |             |                             | 568.79811  | 1135.582  | 2         |           |         |       | 1135.583267 | 59.07     | EMQPTHPIR          |           |           |                 |                 |                   |
| 7        | 8           |             |                             | 568.798476 | 1135.582  | 2         |           |         |       | 1135.583267 | 45.95     | EMQPTHPIR          |           |           |                 |                 |                   |
| 7        | 8           |             |                             | 379.535145 | 1135.584  | 3         |           |         |       | 1135.583267 | 38.54     | EMQPTHPIR          |           |           |                 |                 |                   |
| 7        | 8           |             |                             | 379.535507 | 1135.585  | 3         |           |         |       | 1135.583267 | 35.48     | EMQPTHPIR          |           |           |                 |                 |                   |
| 7        | 8           |             |                             | 609.350927 | 1216.687  | 2         |           |         |       | 1216.687393 | 80.79     | DSTLMQLLR          |           |           |                 |                 |                   |
| 7        | 8           |             |                             | 609.350927 | 1216.687  | 2         |           |         |       | 1216.687393 | 75.96     | DSTLMQLLR          |           |           |                 |                 |                   |
| 7        | 8           |             |                             | 609.351507 | 1216.688  | 2         |           |         |       | 1216.687393 | 80.5      | DSTLMQLLR          |           |           |                 |                 |                   |
| 7        | 8           |             |                             | 609.351507 | 1216.688  | 2         |           |         |       | 1216.687393 | 85.72     | DSTLMQLLR          |           |           |                 |                 |                   |
| 7        | 8           |             |                             | 609.3516   | 1216.689  | 2         |           |         |       | 1216.687393 | 88.41     | DSTLMQLLR          |           |           |                 |                 |                   |
| 7        | 8           |             |                             | 609.351771 | 1216.689  | 2         |           |         |       | 1216.687393 | 88.55     | DSTLMQLLR          |           |           |                 |                 |                   |
| 7        | 8           |             |                             | 617.348426 | 1232.682  | 2         |           |         |       | 1232.682312 | 74.9      | DSTLMQLLR          |           |           |                 |                 |                   |
| 7        | 8           |             |                             | 617.348426 | 1232.682  | 2         |           |         |       | 1232.682312 | 77.05     | DSTLMQLLR          |           |           |                 |                 |                   |
| 7        | 8           |             |                             | 617.348487 | 1232.682  | 2         |           |         |       | 1232.682312 | 74.53     | DSTLMQLLR          |           |           |                 |                 |                   |
| 7        | 8           |             |                             | 617.348563 | 1232.683  | 2         |           |         |       | 1232.682312 | 77.13     | DSTLMQLLR          |           |           |                 |                 |                   |
| 7        | 8           |             |                             | 617.348563 | 1232.683  | 2         |           |         |       | 1232.682312 | 59.79     | DSTLMQLLR          |           |           |                 |                 |                   |
| 7        | 8           |             |                             | 617.348563 | 1232.683  | 2         |           |         |       | 1232.682312 | 33.56     | DSTLMQLLR          |           |           |                 |                 |                   |
| 7        | 8           |             |                             | 617.348563 | 1232.683  | 2         |           |         |       | 1232.682312 | 74.86     | DSTLMQLLR          |           |           |                 |                 |                   |
| 7        | 8           |             |                             | 617.348563 | 1232.683  | 2         |           |         |       | 1232.682312 | 70.49     | DSTLMQLLR          |           |           |                 |                 |                   |
| 7        | 8           |             |                             | 619.817248 | 1237.62   | 2         |           |         |       | 1237.62146  | 27.14     | YLSEVAGDKNK        |           |           |                 |                 |                   |
| 7        | 8           |             |                             | 708.89147  | 1415.768  | 2         |           |         |       | 1415.768478 | 36.14     | YLIPNATQPESK       |           |           |                 |                 |                   |
| 7        | 8           |             |                             | 542.928096 | 1625.762  | 3         |           |         |       | 1625.766937 | 58.39     | AVTEQGHELSNEER     |           |           |                 |                 |                   |
| 7        | 8           |             |                             | 542.928232 | 1625.763  | 3         |           |         |       | 1625.766937 | 75.65     | AVTEQGHELSNEER     |           |           |                 |                 |                   |
| 7        | 8           |             |                             | 542.928514 | 1625.764  | 3         |           |         |       | 1625.766937 | 32.6      | AVTEQGHELSNEER     |           |           |                 |                 |                   |
| 7        | 8           |             |                             | 542.928514 | 1625.764  | 3         |           |         |       | 1625.766937 | 49.43     | AVTEQGHELSNEER     |           |           |                 |                 |                   |
| 7        | 8           |             |                             | 813.891113 | 1625.768  | 2         |           |         |       | 1625.766937 | 117.18    | AVTEQGHELSNEER     |           |           |                 |                 |                   |
| 7        | 8           |             |                             | 813.891113 | 1625.768  | 2         |           |         |       | 1625.766937 | 106.86    | AVTEQGHELSNEER     |           |           |                 |                 |                   |
| 7        | 8           |             |                             | 813.891113 | 1625.768  | 2         |           |         |       | 1625.766937 | 114.14    | AVTEQGHELSNEER     |           |           |                 |                 |                   |
| 7        | 8           |             |                             | 813.891113 | 1625.768  | 2         |           |         |       | 1625.766937 | 114.12    | AVTEQGHELSNEER     |           |           |                 |                 |                   |
| 7        | 8           |             |                             | 1079.55347 | 2157.092  | 2         |           |         |       | 2157.08992  | 50.45     | IEAELQDICNDVLELLDK |           |           |                 |                 |                   |
| 7        | 8           |             |                             | 1079.55347 | 2157.092  | 2         |           |         |       | 2157.08992  | 65.62     | IEAELQDICNDVLELLDK |           |           |                 |                 |                   |
| 7        | 9           | IPI00441498 | Folate receptor alpha precu | 472.247471 | 942.4804  | 2         | 3         | 2.66    | 1.06  | 942.483521  | 35.66     | DVSYLYR            |           |           |                 |                 |                   |
| 7        | 9           |             |                             | 472.247471 | 942.4804  | 2         |           |         |       | 942.483521  | 34.88     | DVSYLYR            |           |           |                 |                 |                   |
| 7        | 9           |             |                             | 472.247471 | 942.4804  | 2         |           |         |       | 942.483521  | 28.46     | DVSYLYR            |           |           |                 |                 |                   |
| 7        | 9           |             |                             | 485.790026 | 969.5655  | 2         |           |         |       | 969.570557  | 44.77     | VLNVPLCK           |           |           |                 |                 |                   |
| 7        | 9           |             |                             | 485.790027 | 969.5655  | 2         |           |         |       | 969.570557  | 47.17     | VLNVPLCK           |           |           |                 |                 |                   |
| 7        | 9           |             |                             | 485.790035 | 969.5655  | 2         |           |         |       | 969.570557  | 31.96     | VLNVPLCK           |           |           |                 |                 |                   |
| 7        | 9           |             |                             | 499.805606 | 997.5967  | 2         |           |         |       | 997.601868  | 47.81     | VLNVPLCK           |           |           |                 |                 |                   |
| 7        | 9           |             |                             | 499.805606 | 997.5967  | 2         |           |         |       | 997.601868  | 33.59     | VLNVPLCK           |           |           |                 |                 |                   |
| 7        | 9           |             |                             | 499.805606 | 997.5967  | 2         |           |         |       | 997.601868  | 47.81     | VLNVPLCK           |           |           |                 |                 |                   |
| 7        | 9           |             |                             | 660.836264 | 1319.658  | 2         |           |         |       | 1319.660172 | 35.94     | TELLNVCMNAK        |           |           |                 |                 |                   |
| 7        | 9           |             |                             | 660.836264 | 1319.658  | 2         |           |         |       | 1319.660172 | 49.09     | TELLNVCMNAK        |           |           |                 |                 |                   |
| 7        | 9           |             |                             | 660.836264 | 1319.658  | 2         |           |         |       | 1319.660172 | 49.75     | TELLNVCMNAK        |           |           |                 |                 |                   |
| 7        | 9           |             |                             | 674.852383 | 1347.69   | 2         |           |         |       | 1347.691483 | 63.46     | TELLNVCMNAK        |           |           |                 |                 |                   |

| Band num | prot_hit_nu | prot_acc    | prot_desc                  | pep_exp_mz | pep_exp_n | pep_exp_z | quantific | average | stdev | pep_calc_mr | pep_score | pep_seq             | light m/z | heavy m/z | light intensity | heavy intensity | ratio light/heavy |  |
|----------|-------------|-------------|----------------------------|------------|-----------|-----------|-----------|---------|-------|-------------|-----------|---------------------|-----------|-----------|-----------------|-----------------|-------------------|--|
| 7        | 9           |             |                            | 674.852383 | 1347.69   | 2         |           |         |       | 1347.691483 | 65.31     | TELLNVCMNAK         |           |           |                 |                 |                   |  |
| 7        | 9           |             |                            | 674.852383 | 1347.69   | 2         |           |         |       | 1347.691483 | 45.45     | TELLNVCMNAK         |           |           |                 |                 |                   |  |
| 7        | 9           |             |                            | 674.852383 | 1347.69   | 2         |           |         |       | 1347.691483 | 59.45     | TELLNVCMNAK         |           |           |                 |                 |                   |  |
| 7        | 9           |             |                            | 820.810076 | 1639.606  | 2         |           |         |       | 1639.605606 | 68.84     | EDCEQWWEDCR         | 820.8109  | 822.8235  | 53.7            | 22.7            | 2.37              |  |
| 7        | 9           |             |                            | 820.810076 | 1639.606  | 2         |           |         |       | 1639.605606 | 61.46     | EDCEQWWEDCR         |           |           |                 |                 |                   |  |
| 7        | 9           |             |                            | 820.810136 | 1639.606  | 2         |           |         |       | 1639.605606 | 58.29     | EDCEQWWEDCR         |           |           |                 |                 |                   |  |
| 7        | 9           |             |                            | 820.810262 | 1639.606  | 2         |           |         |       | 1639.605606 | 64.51     | EDCEQWWEDCR         |           |           |                 |                 |                   |  |
| 7        | 9           |             |                            | 820.810923 | 1639.607  | 2         |           |         |       | 1639.605606 | 69.65     | EDCEQWWEDCR         |           |           |                 |                 |                   |  |
| 7        | 9           |             |                            | 820.810923 | 1639.607  | 2         |           |         |       | 1639.605606 | 75.15     | EDCEQWWEDCR         |           |           |                 |                 |                   |  |
| 7        | 9           |             |                            | 820.810923 | 1639.607  | 2         |           |         |       | 1639.605606 | 82.18     | EDCEQWWEDCR         |           |           |                 |                 |                   |  |
| 7        | 9           |             |                            | 820.810923 | 1639.607  | 2         |           |         |       | 1639.605606 | 74.74     | EDCEQWWEDCR         |           |           |                 |                 |                   |  |
| 7        | 9           |             |                            | 875.370712 | 1748.727  | 2         |           |         |       | 1748.724579 | 79.65     | FNWNHCGEMAPACK      | 875.3707  | 877.3833  | 2.95            | 0.77            | 3.83              |  |
| 7        | 9           |             |                            | 875.370712 | 1748.727  | 2         |           |         |       | 1748.724579 | 69.51     | FNWNHCGEMAPACK      |           |           |                 |                 |                   |  |
| 7        | 9           |             |                            | 875.370712 | 1748.727  | 2         |           |         |       | 1748.724579 | 64.06     | FNWNHCGEMAPACK      |           |           |                 |                 |                   |  |
| 7        | 9           |             |                            | 593.257607 | 1776.751  | 3         |           |         |       | 1776.75589  | 29.99     | FNWNHCGEMAPACK      |           |           |                 |                 |                   |  |
| 7        | 9           |             |                            | 593.257607 | 1776.751  | 3         |           |         |       | 1776.75589  | 25.8      | FNWNHCGEMAPACK      |           |           |                 |                 |                   |  |
| 7        | 9           |             |                            | 593.257607 | 1776.751  | 3         |           |         |       | 1776.75589  | 27.68     | FNWNHCGEMAPACK      |           |           |                 |                 |                   |  |
| 7        | 9           |             |                            | 889.384328 | 1776.754  | 2         |           |         |       | 1776.75589  | 57.76     | FNWNHCGEMAPACK      |           |           |                 |                 |                   |  |
| 7        | 9           |             |                            | 889.384328 | 1776.754  | 2         |           |         |       | 1776.75589  | 60.56     | FNWNHCGEMAPACK      |           |           |                 |                 |                   |  |
| 7        | 9           |             |                            | 889.384328 | 1776.754  | 2         |           |         |       | 1776.75589  | 73.57     | FNWNHCGEMAPACK      |           |           |                 |                 |                   |  |
| 7        | 9           |             |                            | 1145.52963 | 2289.045  | 2         |           |         |       | 2289.033081 | 78.95     | CIQMWFDPAQGNPNEEVAR | 1145.53   | 1147.542  | 5.85            | 3.3             | 1.77              |  |
| 7        | 9           |             |                            | 1145.52963 | 2289.045  | 2         |           |         |       | 2289.033081 | 106.8     | CIQMWFDPAQGNPNEEVAR |           |           |                 |                 |                   |  |
| 7        | 10          | IPI00018146 | 14-3-3 protein theta       | 468.280323 | 934.5461  | 2         | 2         | 3.30    | 1.21  | 934.551193  | 33.66     | NLLSVAYK            |           |           |                 |                 |                   |  |
| 7        | 10          |             |                            | 480.292525 | 958.5705  | 2         |           |         |       | 958.572342  | 55.27     | VISSIEQK            |           |           |                 |                 |                   |  |
| 7        | 10          |             |                            | 480.292536 | 958.5705  | 2         |           |         |       | 958.572342  | 24.72     | VISSIEQK            |           |           |                 |                 |                   |  |
| 7        | 10          |             |                            | 482.2962   | 962.5778  | 2         |           |         |       | 962.582504  | 25.14     | NLLSVAYK            |           |           |                 |                 |                   |  |
| 7        | 10          |             |                            | 482.2962   | 962.5778  | 2         |           |         |       | 962.582504  | 25.76     | NLLSVAYK            |           |           |                 |                 |                   |  |
| 7        | 10          |             |                            | 568.79811  | 1135.582  | 2         |           |         |       | 1135.583267 | 59.07     | EMQPTPIR            |           |           |                 |                 |                   |  |
| 7        | 10          |             |                            | 568.798476 | 1135.582  | 2         |           |         |       | 1135.583267 | 45.95     | EMQPTPIR            |           |           |                 |                 |                   |  |
| 7        | 10          |             |                            | 379.535145 | 1135.584  | 3         |           |         |       | 1135.583267 | 38.54     | EMQPTPIR            |           |           |                 |                 |                   |  |
| 7        | 10          |             |                            | 379.535507 | 1135.585  | 3         |           |         |       | 1135.583267 | 35.48     | EMQPTPIR            |           |           |                 |                 |                   |  |
| 7        | 10          |             |                            | 609.350927 | 1216.687  | 2         |           |         |       | 1216.687393 | 80.79     | DSTLIMQLLR          |           |           |                 |                 |                   |  |
| 7        | 10          |             |                            | 609.350927 | 1216.687  | 2         |           |         |       | 1216.687393 | 75.96     | DSTLIMQLLR          |           |           |                 |                 |                   |  |
| 7        | 10          |             |                            | 609.351507 | 1216.688  | 2         |           |         |       | 1216.687393 | 80.5      | DSTLIMQLLR          |           |           |                 |                 |                   |  |
| 7        | 10          |             |                            | 609.351507 | 1216.688  | 2         |           |         |       | 1216.687393 | 85.72     | DSTLIMQLLR          |           |           |                 |                 |                   |  |
| 7        | 10          |             |                            | 609.3516   | 1216.689  | 2         |           |         |       | 1216.687393 | 88.41     | DSTLIMQLLR          |           |           |                 |                 |                   |  |
| 7        | 10          |             |                            | 609.351771 | 1216.689  | 2         |           |         |       | 1216.687393 | 88.55     | DSTLIMQLLR          |           |           |                 |                 |                   |  |
| 7        | 10          |             |                            | 617.348426 | 1232.682  | 2         |           |         |       | 1232.682312 | 74.9      | DSTLIMQLLR          |           |           |                 |                 |                   |  |
| 7        | 10          |             |                            | 617.348426 | 1232.682  | 2         |           |         |       | 1232.682312 | 77.05     | DSTLIMQLLR          |           |           |                 |                 |                   |  |
| 7        | 10          |             |                            | 617.348487 | 1232.682  | 2         |           |         |       | 1232.682312 | 74.53     | DSTLIMQLLR          |           |           |                 |                 |                   |  |
| 7        | 10          |             |                            | 617.348563 | 1232.683  | 2         |           |         |       | 1232.682312 | 77.13     | DSTLIMQLLR          |           |           |                 |                 |                   |  |
| 7        | 10          |             |                            | 617.348563 | 1232.683  | 2         |           |         |       | 1232.682312 | 59.79     | DSTLIMQLLR          |           |           |                 |                 |                   |  |
| 7        | 10          |             |                            | 617.348563 | 1232.683  | 2         |           |         |       | 1232.682312 | 33.56     | DSTLIMQLLR          |           |           |                 |                 |                   |  |
| 7        | 10          |             |                            | 617.348563 | 1232.683  | 2         |           |         |       | 1232.682312 | 74.86     | DSTLIMQLLR          |           |           |                 |                 |                   |  |
| 7        | 10          |             |                            | 617.348563 | 1232.683  | 2         |           |         |       | 1232.682312 | 70.49     | DSTLIMQLLR          |           |           |                 |                 |                   |  |
| 7        | 10          |             |                            | 648.797667 | 1295.581  | 2         |           |         |       | 1295.58403  | 34.31     | YLAEVACGDDR         | 648.7977  | 650.8102  | 2.62            | 0.63            | 4.16              |  |
| 7        | 10          |             |                            | 780.879484 | 1559.744  | 2         |           |         |       | 1559.745132 | 102.18    | AVTEQGAELSNEER      | 780.8795  | 782.892   | 10.8            | 4.42            | 2.44              |  |
| 7        | 10          |             |                            | 780.879484 | 1559.744  | 2         |           |         |       | 1559.745132 | 99.25     | AVTEQGAELSNEER      |           |           |                 |                 |                   |  |
| 7        | 10          |             |                            | 780.879484 | 1559.744  | 2         |           |         |       | 1559.745132 | 107.73    | AVTEQGAELSNEER      |           |           |                 |                 |                   |  |
| 7        | 11          | IPI00220578 | Guanine nucleotide-binding | 453.736625 | 905.4587  | 2         | 1         | 2.58    | 0.00  | 905.463104  | 24.36     | IDFGEAAR            |           |           |                 |                 |                   |  |
| 7        | 11          |             |                            | 469.230428 | 936.4463  | 2         |           |         |       | 936.451157  | 41.88     | MFDVGGQR            |           |           |                 |                 |                   |  |
| 7        | 11          |             |                            | 469.23043  | 936.4463  | 2         |           |         |       | 936.451157  | 30.63     | MFDVGGQR            |           |           |                 |                 |                   |  |
| 7        | 11          |             |                            | 479.596891 | 1435.769  | 3         |           |         |       | 1435.77356  | 39.86     | TTGIVETHFTFK        |           |           |                 |                 |                   |  |
| 7        | 11          |             |                            | 807.877206 | 1613.74   | 2         |           |         |       | 1613.74202  | 61.01     | EIYTHFTCATDTK       |           |           |                 |                 |                   |  |
| 7        | 11          |             |                            | 807.877206 | 1613.74   | 2         |           |         |       | 1613.74202  | 62.88     | EIYTHFTCATDTK       |           |           |                 |                 |                   |  |
| 7        | 11          |             |                            | 807.877206 | 1613.74   | 2         |           |         |       | 1613.74202  | 55.28     | EIYTHFTCATDTK       |           |           |                 |                 |                   |  |
| 7        | 11          |             |                            | 811.856142 | 1621.698  | 2         |           |         |       | 1621.695435 | 68.23     | IHEDGYSEDECK        |           |           |                 |                 |                   |  |
| 7        | 11          |             |                            | 811.856142 | 1621.698  | 2         |           |         |       | 1621.695435 | 56.69     | IHEDGYSEDECK        |           |           |                 |                 |                   |  |
| 7        | 11          |             |                            | 811.856142 | 1621.698  | 2         |           |         |       | 1621.695435 | 27.12     | IHEDGYSEDECK        |           |           |                 |                 |                   |  |
| 7        | 11          |             |                            | 548.263231 | 1641.768  | 3         |           |         |       | 1641.773331 | 46.07     | EIYTHFTCATDTK       |           |           |                 |                 |                   |  |
| 7        | 11          |             |                            | 548.263231 | 1641.768  | 3         |           |         |       | 1641.773331 | 32.36     | EIYTHFTCATDTK       |           |           |                 |                 |                   |  |
| 7        | 11          |             |                            | 548.263231 | 1641.768  | 3         |           |         |       | 1641.773331 | 31.64     | EIYTHFTCATDTK       |           |           |                 |                 |                   |  |
| 7        | 11          |             |                            | 821.89237  | 1641.77   | 2         |           |         |       | 1641.773331 | 46.9      | EIYTHFTCATDTK       |           |           |                 |                 |                   |  |

| Band num | prot_hit_nu | prot_acc    | prot_desc                  | pep_exp_mz | pep_exp_n | pep_exp_z | quantific | average | stdev | pep_calc_mr | pep_score | pep_seq             | light m/z | heavy m/z | light intensity | heavy intensity | ratio light/heavy |
|----------|-------------|-------------|----------------------------|------------|-----------|-----------|-----------|---------|-------|-------------|-----------|---------------------|-----------|-----------|-----------------|-----------------|-------------------|
| 7        | 11          |             |                            | 821.89237  | 1641.77   | 2         |           |         |       | 1641.773331 | 53.39     | EIYTHFTCATDTK       |           |           |                 |                 |                   |
| 7        | 11          |             |                            | 821.89237  | 1641.77   | 2         |           |         |       | 1641.773331 | 72.44     | EIYTHFTCATDTK       |           |           |                 |                 |                   |
| 7        | 11          |             |                            | 821.89237  | 1641.77   | 2         |           |         |       | 1641.773331 | 22.66     | EIYTHFTCATDTK       |           |           |                 |                 |                   |
| 7        | 11          |             |                            | 825.871635 | 1649.729  | 2         |           |         |       | 1649.726746 | 41.7      | IHEDGYSEDECK        |           |           |                 |                 |                   |
| 7        | 11          |             |                            | 825.871635 | 1649.729  | 2         |           |         |       | 1649.726746 | 22        | IHEDGYSEDECK        |           |           |                 |                 |                   |
| 7        | 11          |             |                            | 825.871635 | 1649.729  | 2         |           |         |       | 1649.726746 | 51.82     | IHEDGYSEDECK        |           |           |                 |                 |                   |
| 7        | 11          |             |                            | 882.50075  | 1762.987  | 2         |           |         |       | 1762.989334 | 71.55     | NVQVFVDAVTDVIIK     |           |           |                 |                 |                   |
| 7        | 11          |             |                            | 882.50075  | 1762.987  | 2         |           |         |       | 1762.989334 | 20.98     | NVQVFVDAVTDVIIK     |           |           |                 |                 |                   |
| 7        | 11          |             |                            | 895.478186 | 1788.942  | 2         |           |         |       | 1788.939453 | 88.35     | ISQSNYIPTQQDVLR     |           |           |                 |                 |                   |
| 7        | 11          |             |                            | 895.478186 | 1788.942  | 2         |           |         |       | 1788.939453 | 75.32     | ISQSNYIPTQQDVLR     |           |           |                 |                 |                   |
| 7        | 11          |             |                            | 895.478186 | 1788.942  | 2         |           |         |       | 1788.939453 | 27.54     | ISQSNYIPTQQDVLR     |           |           |                 |                 |                   |
| 7        | 11          |             |                            | 895.478186 | 1788.942  | 2         |           |         |       | 1788.939453 | 80.94     | ISQSNYIPTQQDVLR     |           |           |                 |                 |                   |
| 7        | 11          |             |                            | 909.050607 | 1816.087  | 2         |           |         |       | 1816.084625 | 89.51     | VVVYSNTIQSIIAIR     | 909.0506  | 911.0632  | 1.58            |                 | 0 L               |
| 7        | 11          |             |                            | 909.050607 | 1816.087  | 2         |           |         |       | 1816.084625 | 103.97    | VVVYSNTIQSIIAIR     |           |           |                 |                 |                   |
| 7        | 11          |             |                            | 1053.99027 | 2105.966  | 2         |           |         |       | 2105.956604 | 132.98    | EYQLNDSASYLNDLDR    | 1053.99   | 1056.003  | 4.02            | 1.56            | 2.58              |
| 7        | 12          | IPI00000816 | 14-3-3 protein epsilon     | 468.280323 | 934.5461  | 2         | 2         | 2.76    | 1.41  | 934.551193  | 33.66     | NLLSVAYK            |           |           |                 |                 |                   |
| 7        | 12          |             |                            | 473.283934 | 944.5533  | 2         |           |         |       | 944.556686  | 22.82     | IISIEQK             |           |           |                 |                 |                   |
| 7        | 12          |             |                            | 473.284029 | 944.5535  | 2         |           |         |       | 944.556686  | 23.05     | IISIEQK             |           |           |                 |                 |                   |
| 7        | 12          |             |                            | 482.2962   | 962.5778  | 2         |           |         |       | 962.582504  | 25.14     | NLLSVAYK            |           |           |                 |                 |                   |
| 7        | 12          |             |                            | 482.2962   | 962.5778  | 2         |           |         |       | 962.582504  | 25.76     | NLLSVAYK            |           |           |                 |                 |                   |
| 7        | 12          |             |                            | 487.29871  | 972.5829  | 2         |           |         |       | 972.587997  | 23.42     | IISIEQK             |           |           |                 |                 |                   |
| 7        | 12          |             |                            | 609.350927 | 1216.687  | 2         |           |         |       | 1216.687393 | 80.79     | DSTLIMQLLR          |           |           |                 |                 |                   |
| 7        | 12          |             |                            | 609.350927 | 1216.687  | 2         |           |         |       | 1216.687393 | 75.96     | DSTLIMQLLR          |           |           |                 |                 |                   |
| 7        | 12          |             |                            | 609.351507 | 1216.688  | 2         |           |         |       | 1216.687393 | 80.5      | DSTLIMQLLR          |           |           |                 |                 |                   |
| 7        | 12          |             |                            | 609.351507 | 1216.688  | 2         |           |         |       | 1216.687393 | 85.72     | DSTLIMQLLR          |           |           |                 |                 |                   |
| 7        | 12          |             |                            | 609.3516   | 1216.689  | 2         |           |         |       | 1216.687393 | 88.41     | DSTLIMQLLR          |           |           |                 |                 |                   |
| 7        | 12          |             |                            | 609.351771 | 1216.689  | 2         |           |         |       | 1216.687393 | 88.55     | DSTLIMQLLR          |           |           |                 |                 |                   |
| 7        | 12          |             |                            | 617.348426 | 1232.682  | 2         |           |         |       | 1232.682312 | 74.9      | DSTLIMQLLR          |           |           |                 |                 |                   |
| 7        | 12          |             |                            | 617.348426 | 1232.682  | 2         |           |         |       | 1232.682312 | 77.05     | DSTLIMQLLR          |           |           |                 |                 |                   |
| 7        | 12          |             |                            | 617.348487 | 1232.682  | 2         |           |         |       | 1232.682312 | 74.53     | DSTLIMQLLR          |           |           |                 |                 |                   |
| 7        | 12          |             |                            | 617.348563 | 1232.683  | 2         |           |         |       | 1232.682312 | 77.13     | DSTLIMQLLR          |           |           |                 |                 |                   |
| 7        | 12          |             |                            | 617.348563 | 1232.683  | 2         |           |         |       | 1232.682312 | 59.79     | DSTLIMQLLR          |           |           |                 |                 |                   |
| 7        | 12          |             |                            | 617.348563 | 1232.683  | 2         |           |         |       | 1232.682312 | 33.56     | DSTLIMQLLR          |           |           |                 |                 |                   |
| 7        | 12          |             |                            | 617.348563 | 1232.683  | 2         |           |         |       | 1232.682312 | 74.86     | DSTLIMQLLR          |           |           |                 |                 |                   |
| 7        | 12          |             |                            | 617.348563 | 1232.683  | 2         |           |         |       | 1232.682312 | 70.49     | DSTLIMQLLR          |           |           |                 |                 |                   |
| 7        | 12          |             |                            | 625.835766 | 1249.657  | 2         |           |         |       | 1249.657837 | 61.46     | EAAENSLVAYK         | 625.8358  | 629.8609  | 2.44            | 0.65            | 3.75              |
| 7        | 12          |             |                            | 633.34764  | 1264.681  | 2         |           |         |       | 1264.679977 | 43.92     | HLIPAANTGESK        | 633.3476  | 635.3602  | 2.01            | 1.14            | 1.76              |
| 7        | 12          |             |                            | 633.34764  | 1264.681  | 2         |           |         |       | 1264.679977 | 42.74     | HLIPAANTGESK        |           |           |                 |                 |                   |
| 7        | 12          |             |                            | 647.362188 | 1292.71   | 2         |           |         |       | 1292.711288 | 38.53     | HLIPAANTGESK        |           |           |                 |                 |                   |
| 7        | 12          |             |                            | 647.362455 | 1292.71   | 2         |           |         |       | 1292.711288 | 43.37     | HLIPAANTGESK        |           |           |                 |                 |                   |
| 7        | 12          |             |                            | 746.373754 | 1490.733  | 2         |           |         |       | 1490.731064 | 54.55     | VAGMDVELTVEER       |           |           |                 |                 |                   |
| 7        | 12          |             |                            | 752.893932 | 1503.773  | 2         |           |         |       | 1503.770142 | 56.81     | LICCDILDVLDK        |           |           |                 |                 |                   |
| 7        | 12          |             |                            | 752.893932 | 1503.773  | 2         |           |         |       | 1503.770142 | 49.54     | LICCDILDVLDK        |           |           |                 |                 |                   |
| 7        | 12          |             |                            | 616.660621 | 1846.96   | 3         |           |         |       | 1846.963562 | 43.92     | AASDIAMTELPPTHPIR   |           |           |                 |                 |                   |
| 7        | 12          |             |                            | 616.660644 | 1846.96   | 3         |           |         |       | 1846.963562 | 46.66     | AASDIAMTELPPTHPIR   |           |           |                 |                 |                   |
| 7        | 12          |             |                            | 924.488366 | 1846.962  | 2         |           |         |       | 1846.963562 | 48.7      | AASDIAMTELPPTHPIR   |           |           |                 |                 |                   |
| 7        | 12          |             |                            | 924.488366 | 1846.962  | 2         |           |         |       | 1846.963562 | 22.77     | AASDIAMTELPPTHPIR   |           |           |                 |                 |                   |
| 7        | 12          |             |                            | 715.348882 | 2143.025  | 3         |           |         |       | 2143.023285 | 53.16     | AAFDDAIAELDTLSEESYK |           |           |                 |                 |                   |
| 7        | 13          | IPI00217906 | Isoform 2 of Guanine nucle | 469.230428 | 936.4463  | 2         | 2         | 6.41    | 0.44  | 936.451157  | 41.88     | MFDVGGQR            |           |           |                 |                 |                   |
| 7        | 13          |             |                            | 469.23043  | 936.4463  | 2         |           |         |       | 936.451157  | 30.63     | MFDVGGQR            |           |           |                 |                 |                   |
| 7        | 13          |             |                            | 479.596891 | 1435.769  | 3         |           |         |       | 1435.77356  | 39.86     | TTGIVETHFTFK        |           |           |                 |                 |                   |
| 7        | 13          |             |                            | 781.88813  | 1561.762  | 2         |           |         |       | 1561.758301 | 93.44     | AMGNLQIDFADPSR      |           |           |                 |                 |                   |
| 7        | 13          |             |                            | 781.88813  | 1561.762  | 2         |           |         |       | 1561.758301 | 86.63     | AMGNLQIDFADPSR      |           |           |                 |                 |                   |
| 7        | 13          |             |                            | 807.877206 | 1613.74   | 2         |           |         |       | 1613.74202  | 61.01     | EIYTHFTCATDTK       |           |           |                 |                 |                   |
| 7        | 13          |             |                            | 807.877206 | 1613.74   | 2         |           |         |       | 1613.74202  | 62.88     | EIYTHFTCATDTK       |           |           |                 |                 |                   |
| 7        | 13          |             |                            | 807.877206 | 1613.74   | 2         |           |         |       | 1613.74202  | 55.28     | EIYTHFTCATDTK       |           |           |                 |                 |                   |
| 7        | 13          |             |                            | 548.263231 | 1641.768  | 3         |           |         |       | 1641.773331 | 46.07     | EIYTHFTCATDTK       |           |           |                 |                 |                   |
| 7        | 13          |             |                            | 548.263231 | 1641.768  | 3         |           |         |       | 1641.773331 | 32.36     | EIYTHFTCATDTK       |           |           |                 |                 |                   |
| 7        | 13          |             |                            | 548.263231 | 1641.768  | 3         |           |         |       | 1641.773331 | 31.64     | EIYTHFTCATDTK       |           |           |                 |                 |                   |
| 7        | 13          |             |                            | 821.89237  | 1641.77   | 2         |           |         |       | 1641.773331 | 46.9      | EIYTHFTCATDTK       |           |           |                 |                 |                   |
| 7        | 13          |             |                            | 821.89237  | 1641.77   | 2         |           |         |       | 1641.773331 | 53.39     | EIYTHFTCATDTK       |           |           |                 |                 |                   |
| 7        | 13          |             |                            | 821.89237  | 1641.77   | 2         |           |         |       | 1641.773331 | 72.44     | EIYTHFTCATDTK       |           |           |                 |                 |                   |
| 7        | 13          |             |                            | 821.89237  | 1641.77   | 2         |           |         |       | 1641.773331 | 22.66     | EIYTHFTCATDTK       |           |           |                 |                 |                   |

| Band num | prot_hit_nu | prot_acc    | prot_desc                  | pep_exp_mz | pep_exp_n | pep_exp_z | quantific | average | stdev | pep_calc_mr | pep_score | pep_seq          | light m/z | heavy m/z | light intensity | heavy intensity | ratio light/heavy |
|----------|-------------|-------------|----------------------------|------------|-----------|-----------|-----------|---------|-------|-------------|-----------|------------------|-----------|-----------|-----------------|-----------------|-------------------|
| 7        | 13          |             |                            | 555.578427 | 1663.713  | 3         |           |         |       | 1663.717224 | 36.33     | IHEDGYSEEECR     |           |           |                 |                 |                   |
| 7        | 13          |             |                            | 555.578692 | 1663.714  | 3         |           |         |       | 1663.717224 | 43.19     | IHEDGYSEEECR     |           |           |                 |                 |                   |
| 7        | 13          |             |                            | 555.578692 | 1663.714  | 3         |           |         |       | 1663.717224 | 46        | IHEDGYSEEECR     |           |           |                 |                 |                   |
| 7        | 13          |             |                            | 832.865563 | 1663.717  | 2         |           |         |       | 1663.717224 | 64.08     | IHEDGYSEEECR     |           |           |                 |                 |                   |
| 7        | 13          |             |                            | 832.865563 | 1663.717  | 2         |           |         |       | 1663.717224 | 65.44     | IHEDGYSEEECR     |           |           |                 |                 |                   |
| 7        | 13          |             |                            | 832.865563 | 1663.717  | 2         |           |         |       | 1663.717224 | 66.91     | IHEDGYSEEECR     |           |           |                 |                 |                   |
| 7        | 13          |             |                            | 832.865563 | 1663.717  | 2         |           |         |       | 1663.717224 | 33.35     | IHEDGYSEEECR     |           |           |                 |                 |                   |
| 7        | 13          |             |                            | 882.50075  | 1762.987  | 2         |           |         |       | 1762.989334 | 71.55     | NVQVFDAVTDVIIK   |           |           |                 |                 |                   |
| 7        | 13          |             |                            | 882.50075  | 1762.987  | 2         |           |         |       | 1762.989334 | 20.98     | NVQVFDAVTDVIIK   |           |           |                 |                 |                   |
| 7        | 13          |             |                            | 887.972927 | 1773.931  | 2         |           |         |       | 1773.928558 | 66.1      | IAQSDYIPTQQDVLR  | 887.9729  | 889.9855  | 10.3            | 1.69            | 6.09              |
| 7        | 13          |             |                            | 887.972927 | 1773.931  | 2         |           |         |       | 1773.928558 | 93.52     | IAQSDYIPTQQDVLR  |           |           |                 |                 |                   |
| 7        | 13          |             |                            | 887.972927 | 1773.931  | 2         |           |         |       | 1773.928558 | 69.49     | IAQSDYIPTQQDVLR  |           |           |                 |                 |                   |
| 7        | 13          |             |                            | 897.017658 | 1792.021  | 2         |           |         |       | 1792.019257 | 84.04     | AVVYSNTIQSIMAIVK | 897.0177  | 901.0428  | 2.42            | 0.36            | 6.72              |
| 7        | 13          | IPI00748145 | guanine nucleotide binding | 469.230428 | 936.4463  | 2         | 2         | 6.41    | 0.44  | 936.451157  | 41.88     | MFDVGGQR         |           |           |                 |                 |                   |
| 7        | 13          |             |                            | 469.23043  | 936.4463  | 2         |           |         |       | 936.451157  | 30.63     | MFDVGGQR         |           |           |                 |                 |                   |
| 7        | 13          |             |                            | 479.596891 | 1435.769  | 3         |           |         |       | 1435.773566 | 39.86     | TTGIVETHFTFK     |           |           |                 |                 |                   |
| 7        | 13          |             |                            | 781.88813  | 1561.762  | 2         |           |         |       | 1561.758301 | 93.44     | AMGNLQIDFADPSR   |           |           |                 |                 |                   |
| 7        | 13          |             |                            | 781.88813  | 1561.762  | 2         |           |         |       | 1561.758301 | 86.63     | AMGNLQIDFADPSR   |           |           |                 |                 |                   |
| 7        | 13          |             |                            | 807.877206 | 1613.74   | 2         |           |         |       | 1613.74202  | 61.01     | EIYTHFTCATDTK    |           |           |                 |                 |                   |
| 7        | 13          |             |                            | 807.877206 | 1613.74   | 2         |           |         |       | 1613.74202  | 62.88     | EIYTHFTCATDTK    |           |           |                 |                 |                   |
| 7        | 13          |             |                            | 807.877206 | 1613.74   | 2         |           |         |       | 1613.74202  | 55.28     | EIYTHFTCATDTK    |           |           |                 |                 |                   |
| 7        | 13          |             |                            | 548.263231 | 1641.768  | 3         |           |         |       | 1641.773331 | 46.07     | EIYTHFTCATDTK    |           |           |                 |                 |                   |
| 7        | 13          |             |                            | 548.263231 | 1641.768  | 3         |           |         |       | 1641.773331 | 32.36     | EIYTHFTCATDTK    |           |           |                 |                 |                   |
| 7        | 13          |             |                            | 548.263231 | 1641.768  | 3         |           |         |       | 1641.773331 | 31.64     | EIYTHFTCATDTK    |           |           |                 |                 |                   |
| 7        | 13          |             |                            | 821.89237  | 1641.77   | 2         |           |         |       | 1641.773331 | 46.9      | EIYTHFTCATDTK    |           |           |                 |                 |                   |
| 7        | 13          |             |                            | 821.89237  | 1641.77   | 2         |           |         |       | 1641.773331 | 53.39     | EIYTHFTCATDTK    |           |           |                 |                 |                   |
| 7        | 13          |             |                            | 821.89237  | 1641.77   | 2         |           |         |       | 1641.773331 | 72.44     | EIYTHFTCATDTK    |           |           |                 |                 |                   |
| 7        | 13          |             |                            | 821.89237  | 1641.77   | 2         |           |         |       | 1641.773331 | 22.66     | EIYTHFTCATDTK    |           |           |                 |                 |                   |
| 7        | 13          |             |                            | 555.578427 | 1663.713  | 3         |           |         |       | 1663.717224 | 36.33     | IHEDGYSEEECR     |           |           |                 |                 |                   |
| 7        | 13          |             |                            | 555.578692 | 1663.714  | 3         |           |         |       | 1663.717224 | 43.19     | IHEDGYSEEECR     |           |           |                 |                 |                   |
| 7        | 13          |             |                            | 555.578692 | 1663.714  | 3         |           |         |       | 1663.717224 | 46        | IHEDGYSEEECR     |           |           |                 |                 |                   |
| 7        | 13          |             |                            | 832.865563 | 1663.717  | 2         |           |         |       | 1663.717224 | 64.08     | IHEDGYSEEECR     |           |           |                 |                 |                   |
| 7        | 13          |             |                            | 832.865563 | 1663.717  | 2         |           |         |       | 1663.717224 | 65.44     | IHEDGYSEEECR     |           |           |                 |                 |                   |
| 7        | 13          |             |                            | 832.865563 | 1663.717  | 2         |           |         |       | 1663.717224 | 66.91     | IHEDGYSEEECR     |           |           |                 |                 |                   |
| 7        | 13          |             |                            | 832.865563 | 1663.717  | 2         |           |         |       | 1663.717224 | 33.35     | IHEDGYSEEECR     |           |           |                 |                 |                   |
| 7        | 13          |             |                            | 882.50075  | 1762.987  | 2         |           |         |       | 1762.989334 | 71.55     | NVQVFDAVTDVIIK   |           |           |                 |                 |                   |
| 7        | 13          |             |                            | 882.50075  | 1762.987  | 2         |           |         |       | 1762.989334 | 20.98     | NVQVFDAVTDVIIK   |           |           |                 |                 |                   |
| 7        | 13          |             |                            | 887.972927 | 1773.931  | 2         |           |         |       | 1773.928558 | 66.1      | IAQSDYIPTQQDVLR  |           |           |                 |                 |                   |
| 7        | 13          |             |                            | 887.972927 | 1773.931  | 2         |           |         |       | 1773.928558 | 93.52     | IAQSDYIPTQQDVLR  |           |           |                 |                 |                   |
| 7        | 13          |             |                            | 887.972927 | 1773.931  | 2         |           |         |       | 1773.928558 | 69.49     | IAQSDYIPTQQDVLR  |           |           |                 |                 |                   |
| 7        | 13          |             |                            | 897.017658 | 1792.021  | 2         |           |         |       | 1792.019257 | 84.04     | AVVYSNTIQSIMAIVK |           |           |                 |                 |                   |
| 7        | 14          | IPI00465028 | Triosephosphate isomeras   | 597.320381 | 1192.626  | 2         | 2         | 3.20    | 0.78  | 1192.629868 | 22.55     | IAVAAQNCYK       |           |           |                 |                 |                   |
| 7        | 14          |             |                            | 597.320446 | 1192.626  | 2         |           |         |       | 1192.629868 | 22.65     | IAVAAQNCYK       |           |           |                 |                 |                   |
| 7        | 14          |             |                            | 631.820206 | 1261.626  | 2         |           |         |       | 1261.628677 | 72.27     | SNVSDAVAQSTR     |           |           |                 |                 |                   |
| 7        | 14          |             |                            | 631.820206 | 1261.626  | 2         |           |         |       | 1261.628677 | 70.51     | SNVSDAVAQSTR     |           |           |                 |                 |                   |
| 7        | 14          |             |                            | 631.820206 | 1261.626  | 2         |           |         |       | 1261.628677 | 79.45     | SNVSDAVAQSTR     |           |           |                 |                 |                   |
| 7        | 14          |             |                            | 677.855297 | 1353.696  | 2         |           |         |       | 1353.698654 | 53.88     | IYGGSVTGATCK     |           |           |                 |                 |                   |
| 7        | 14          |             |                            | 677.855297 | 1353.696  | 2         |           |         |       | 1353.698654 | 49.26     | IYGGSVTGATCK     |           |           |                 |                 |                   |
| 7        | 14          |             |                            | 498.922778 | 1493.747  | 3         |           |         |       | 1493.749863 | 26.27     | TATPQQAQEVHEK    |           |           |                 |                 |                   |
| 7        | 14          |             |                            | 498.922823 | 1493.747  | 3         |           |         |       | 1493.749863 | 46.44     | TATPQQAQEVHEK    |           |           |                 |                 |                   |
| 7        | 14          |             |                            | 498.922833 | 1493.747  | 3         |           |         |       | 1493.749863 | 25.96     | TATPQQAQEVHEK    |           |           |                 |                 |                   |
| 7        | 14          |             |                            | 498.922833 | 1493.747  | 3         |           |         |       | 1493.749863 | 31.47     | TATPQQAQEVHEK    |           |           |                 |                 |                   |
| 7        | 14          |             |                            | 498.922833 | 1493.747  | 3         |           |         |       | 1493.749863 | 32.52     | TATPQQAQEVHEK    |           |           |                 |                 |                   |
| 7        | 14          |             |                            | 508.267077 | 1521.779  | 3         |           |         |       | 1521.781174 | 54.06     | TATPQQAQEVHEK    |           |           |                 |                 |                   |
| 7        | 14          |             |                            | 508.267077 | 1521.779  | 3         |           |         |       | 1521.781174 | 54.39     | TATPQQAQEVHEK    |           |           |                 |                 |                   |
| 7        | 14          |             |                            | 508.267097 | 1521.779  | 3         |           |         |       | 1521.781174 | 43.28     | TATPQQAQEVHEK    |           |           |                 |                 |                   |
| 7        | 14          |             |                            | 508.267097 | 1521.779  | 3         |           |         |       | 1521.781174 | 58.45     | TATPQQAQEVHEK    |           |           |                 |                 |                   |
| 7        | 14          |             |                            | 538.927675 | 1613.761  | 3         |           |         |       | 1613.76445  | 54.33     | DCGATWVVLGHSER   |           |           |                 |                 |                   |
| 7        | 14          |             |                            | 538.927675 | 1613.761  | 3         |           |         |       | 1613.76445  | 61.44     | DCGATWVVLGHSER   |           |           |                 |                 |                   |
| 7        | 14          |             |                            | 807.890446 | 1613.766  | 2         |           |         |       | 1613.76445  | 87.54     | DCGATWVVLGHSER   | 807.8905  | 809.903   | 10.1            | 2.69            | 3.75              |
| 7        | 14          |             |                            | 807.890446 | 1613.766  | 2         |           |         |       | 1613.76445  | 79.45     | DCGATWVVLGHSER   |           |           |                 |                 |                   |
| 7        | 14          |             |                            | 807.890446 | 1613.766  | 2         |           |         |       | 1613.76445  | 90.61     | DCGATWVVLGHSER   |           |           |                 |                 |                   |
| 7        | 14          |             |                            | 807.890446 | 1613.766  | 2         |           |         |       | 1613.76445  | 93.86     | DCGATWVVLGHSER   |           |           |                 |                 |                   |

| Band num | prot_hit_nu | prot_acc    | prot_desc                 | pep_exp_mz | pep_exp_n | pep_exp_z | quantific | average | stdev | pep_calc_mr | pep_score | pep_seq              | light m/z | heavy m/z | light intensity | heavy intensity | ratio light/heavy |
|----------|-------------|-------------|---------------------------|------------|-----------|-----------|-----------|---------|-------|-------------|-----------|----------------------|-----------|-----------|-----------------|-----------------|-------------------|
| 7        | 14          |             |                           | 1110.56011 | 2219.106  | 2         |           |         |       | 2219.095673 | 110.09    | VPADEVVVCAPPTAYIDFAR | 1110.56   | 1112.573  | 6.57            | 2.48            | 2.65              |
| 7        | 14          |             |                           | 1110.56011 | 2219.106  | 2         |           |         |       | 2219.095673 | 94        | VPADEVVVCAPPTAYIDFAR |           |           |                 |                 |                   |
| 7        | 14          |             |                           | 1110.56011 | 2219.106  | 2         |           |         |       | 2219.095673 | 84.84     | VPADEVVVCAPPTAYIDFAR |           |           |                 |                 |                   |
| 7        | 14          |             |                           | 740.710233 | 2219.109  | 3         |           |         |       | 2219.095673 | 36.45     | VPADEVVVCAPPTAYIDFAR |           |           |                 |                 |                   |
| 7        | 15          | IPI00219217 | L-lactate dehydrogenase B | 385.748116 | 769.4817  | 2         | 2         | 3.97    | 1.43  | 769.483459  | 28.5      | LNLVQR               |           |           |                 |                 |                   |
| 7        | 15          |             |                           | 385.748116 | 769.4817  | 2         |           |         |       | 769.483459  | 33        | LNLVQR               |           |           |                 |                 |                   |
| 7        | 15          |             |                           | 385.748116 | 769.4817  | 2         |           |         |       | 769.483459  | 32.92     | LNLVQR               |           |           |                 |                 |                   |
| 7        | 15          |             |                           | 471.309297 | 940.604   | 2         |           |         |       | 940.60936   | 45.65     | IVVVTAGVR            |           |           |                 |                 |                   |
| 7        | 15          |             |                           | 471.309297 | 940.604   | 2         |           |         |       | 940.60936   | 25.73     | IVVVTAGVR            |           |           |                 |                 |                   |
| 7        | 15          |             |                           | 471.309814 | 940.6051  | 2         |           |         |       | 940.60936   | 25.95     | IVVVTAGVR            |           |           |                 |                 |                   |
| 7        | 15          |             |                           | 493.325401 | 984.6363  | 2         |           |         |       | 984.639618  | 28.03     | FIIPQIVK             |           |           |                 |                 |                   |
| 7        | 15          |             |                           | 493.325416 | 984.6363  | 2         |           |         |       | 984.639618  | 28.97     | FIIPQIVK             |           |           |                 |                 |                   |
| 7        | 15          |             |                           | 493.326568 | 984.6386  | 2         |           |         |       | 984.639618  | 25.8      | FIIPQIVK             |           |           |                 |                 |                   |
| 7        | 15          |             |                           | 494.294039 | 986.5735  | 2         |           |         |       | 986.578476  | 39.63     | GLTSVINQK            |           |           |                 |                 |                   |
| 7        | 15          |             |                           | 507.342466 | 1012.67   | 2         |           |         |       | 1012.670929 | 22.79     | FIIPQIVK             |           |           |                 |                 |                   |
| 7        | 15          |             |                           | 508.309351 | 1014.604  | 2         |           |         |       | 1014.609787 | 52        | GLTSVINQK            | 508.3094  | 512.3345  | 7.17            | 1.44            | 4.98              |
| 7        | 15          |             |                           | 616.829534 | 1231.645  | 2         |           |         |       | 1231.647324 | 43.97     | SADTLWDIQK           | 616.8295  | 618.8421  | 4.44            | 1.5             | 2.96              |
| 7        | 15          |             |                           | 638.820437 | 1275.626  | 2         |           |         |       | 1275.626556 | 45.99     | VIGSGCNLDSAR         |           |           |                 |                 |                   |
| 7        | 15          |             |                           | 638.820437 | 1275.626  | 2         |           |         |       | 1275.626556 | 56.44     | VIGSGCNLDSAR         |           |           |                 |                 |                   |
| 7        | 15          |             |                           | 638.820441 | 1275.626  | 2         |           |         |       | 1275.626556 | 49.74     | VIGSGCNLDSAR         |           |           |                 |                 |                   |
| 7        | 15          |             |                           | 638.820444 | 1275.626  | 2         |           |         |       | 1275.626556 | 43.6      | VIGSGCNLDSAR         |           |           |                 |                 |                   |
| 7        | 15          |             |                           | 829.449313 | 1656.884  | 2         |           |         |       | 1656.884598 | 119.63    | SLADELALVDVLEDK      |           |           |                 |                 |                   |
| 7        | 15          |             |                           | 829.449313 | 1656.884  | 2         |           |         |       | 1656.884598 | 119.48    | SLADELALVDVLEDK      |           |           |                 |                 |                   |
| 7        | 15          |             |                           | 829.449313 | 1656.884  | 2         |           |         |       | 1656.884598 | 108.36    | SLADELALVDVLEDK      |           |           |                 |                 |                   |
| 7        | 15          |             |                           | 843.464937 | 1684.915  | 2         |           |         |       | 1684.915909 | 118.6     | SLADELALVDVLEDK      |           |           |                 |                 |                   |
| 7        | 15          |             |                           | 843.464937 | 1684.915  | 2         |           |         |       | 1684.915909 | 109.41    | SLADELALVDVLEDK      |           |           |                 |                 |                   |
| 7        | 15          |             |                           | 843.464937 | 1684.915  | 2         |           |         |       | 1684.915909 | 111.16    | SLADELALVDVLEDK      |           |           |                 |                 |                   |
| 7        | 15          |             |                           | 861.968946 | 1721.923  | 2         |           |         |       | 1721.922363 | 79.13     | LIAPVAEEETVPNNK      |           |           |                 |                 |                   |
| 7        | 15          |             |                           | 861.968946 | 1721.923  | 2         |           |         |       | 1721.922363 | 69.16     | LIAPVAEEETVPNNK      |           |           |                 |                 |                   |
| 7        | 15          |             |                           | 861.968946 | 1721.923  | 2         |           |         |       | 1721.922363 | 80.68     | LIAPVAEEETVPNNK      |           |           |                 |                 |                   |
| 7        | 15          |             |                           | 875.984497 | 1749.954  | 2         |           |         |       | 1749.953674 | 55.24     | LIAPVAEEETVPNNK      |           |           |                 |                 |                   |
| 7        | 16          | IPI00220642 | 14-3-3 protein gamma      | 468.280323 | 934.5461  | 2         | 2         | 3.18    | 0.29  | 934.551193  | 33.66     | NLLSVAYK             |           |           |                 |                 |                   |
| 7        | 16          |             |                           | 480.292525 | 958.5705  | 2         |           |         |       | 958.572342  | 55.27     | VISSIEQK             |           |           |                 |                 |                   |
| 7        | 16          |             |                           | 480.292536 | 958.5705  | 2         |           |         |       | 958.572342  | 24.72     | VISSIEQK             |           |           |                 |                 |                   |
| 7        | 16          |             |                           | 482.2962   | 962.5778  | 2         |           |         |       | 962.582504  | 25.14     | NLLSVAYK             |           |           |                 |                 |                   |
| 7        | 16          |             |                           | 482.2962   | 962.5778  | 2         |           |         |       | 962.582504  | 25.76     | NLLSVAYK             |           |           |                 |                 |                   |
| 7        | 16          |             |                           | 609.350927 | 1216.687  | 2         |           |         |       | 1216.687393 | 80.79     | DSTLIMQLLR           |           |           |                 |                 |                   |
| 7        | 16          |             |                           | 609.350927 | 1216.687  | 2         |           |         |       | 1216.687393 | 75.96     | DSTLIMQLLR           |           |           |                 |                 |                   |
| 7        | 16          |             |                           | 609.351507 | 1216.688  | 2         |           |         |       | 1216.687393 | 80.5      | DSTLIMQLLR           |           |           |                 |                 |                   |
| 7        | 16          |             |                           | 609.351507 | 1216.688  | 2         |           |         |       | 1216.687393 | 85.72     | DSTLIMQLLR           |           |           |                 |                 |                   |
| 7        | 16          |             |                           | 609.3516   | 1216.689  | 2         |           |         |       | 1216.687393 | 88.41     | DSTLIMQLLR           |           |           |                 |                 |                   |
| 7        | 16          |             |                           | 609.351771 | 1216.689  | 2         |           |         |       | 1216.687393 | 88.55     | DSTLIMQLLR           |           |           |                 |                 |                   |
| 7        | 16          |             |                           | 617.348426 | 1232.682  | 2         |           |         |       | 1232.682312 | 74.9      | DSTLIMQLLR           |           |           |                 |                 |                   |
| 7        | 16          |             |                           | 617.348426 | 1232.682  | 2         |           |         |       | 1232.682312 | 77.05     | DSTLIMQLLR           |           |           |                 |                 |                   |
| 7        | 16          |             |                           | 617.348487 | 1232.682  | 2         |           |         |       | 1232.682312 | 74.53     | DSTLIMQLLR           |           |           |                 |                 |                   |
| 7        | 16          |             |                           | 617.348563 | 1232.683  | 2         |           |         |       | 1232.682312 | 77.13     | DSTLIMQLLR           |           |           |                 |                 |                   |
| 7        | 16          |             |                           | 617.348563 | 1232.683  | 2         |           |         |       | 1232.682312 | 59.79     | DSTLIMQLLR           |           |           |                 |                 |                   |
| 7        | 16          |             |                           | 617.348563 | 1232.683  | 2         |           |         |       | 1232.682312 | 33.56     | DSTLIMQLLR           |           |           |                 |                 |                   |
| 7        | 16          |             |                           | 617.348563 | 1232.683  | 2         |           |         |       | 1232.682312 | 74.86     | DSTLIMQLLR           |           |           |                 |                 |                   |
| 7        | 16          |             |                           | 617.348563 | 1232.683  | 2         |           |         |       | 1232.682312 | 70.49     | DSTLIMQLLR           |           |           |                 |                 |                   |
| 7        | 16          |             |                           | 319.167183 | 1272.64   | 4         |           |         |       | 1272.642181 | 26.37     | EHMQPThPIR           |           |           |                 |                 |                   |
| 7        | 16          |             |                           | 836.413074 | 1670.812  | 2         |           |         |       | 1670.813553 | 69.3      | NVTELNEPLSNEER       | 319.1672  | 320.1735  | 1.32            | 0.39            | 3.38              |
| 7        | 16          |             |                           | 836.413074 | 1670.812  | 2         |           |         |       | 1670.813553 | 74.28     | NVTELNEPLSNEER       | 836.4131  | 838.4256  | 7.77            | 2.61            | 2.98              |
| 7        | 16          |             |                           | 836.413074 | 1670.812  | 2         |           |         |       | 1670.813553 | 77.09     | NVTELNEPLSNEER       |           |           |                 |                 |                   |
| 7        | 16          |             |                           | 836.413074 | 1670.812  | 2         |           |         |       | 1670.813553 | 76.62     | NVTELNEPLSNEER       |           |           |                 |                 |                   |
| 7        | 17          | IPI00218918 | Annexin A1                | 468.742715 | 935.4709  | 2         | 2         | 2.52    | 0.65  | 935.473663  | 25.51     | ALYEAGER             |           |           |                 |                 |                   |
| 7        | 17          |             |                           | 645.819654 | 1289.625  | 2         |           |         |       | 1289.627625 | 38.43     | TPAQFDADELK          |           |           |                 |                 |                   |
| 7        | 17          |             |                           | 708.406741 | 1414.799  | 2         |           |         |       | 1414.794342 | 74.55     | GVDEATIIDILTK        |           |           |                 |                 |                   |
| 7        | 17          |             |                           | 708.406741 | 1414.799  | 2         |           |         |       | 1414.794342 | 97.02     | GVDEATIIDILTK        |           |           |                 |                 |                   |
| 7        | 17          |             |                           | 831.51517  | 1661.016  | 2         |           |         |       | 1661.015152 | 36.17     | ALIGHLEEVVLLK        |           |           |                 |                 |                   |
| 7        | 17          |             |                           | 577.643775 | 1729.909  | 3         |           |         |       | 1729.912216 | 26.2      | GLGTDEDTLIEILASR     |           |           |                 |                 |                   |
| 7        | 17          |             |                           | 865.964045 | 1729.914  | 2         |           |         |       | 1729.912216 | 113.87    | GLGTDEDTLIEILASR     | 865.9641  | 867.9766  | 11.5            | 5.57            | 2.06              |
| 7        | 17          |             |                           | 865.964045 | 1729.914  | 2         |           |         |       | 1729.912216 | 111.31    | GLGTDEDTLIEILASR     |           |           |                 |                 |                   |

| Band num | prot_hit_nu | prot_acc    | prot_desc            | pep_exp_mz | pep_exp_n | pep_exp_z | quantific | average | stdev | pep_calc_mr | pep_score | pep_seq                  | light m/z | heavy m/z | light intensity | heavy intensity | ratio light/heavy |
|----------|-------------|-------------|----------------------|------------|-----------|-----------|-----------|---------|-------|-------------|-----------|--------------------------|-----------|-----------|-----------------|-----------------|-------------------|
| 7        | 17          |             |                      | 865.964045 | 1729.914  | 2         |           |         |       | 1729.912216 | 139.71    | GLGTDEDTLIEILASR         |           |           |                 |                 |                   |
| 7        | 17          |             |                      | 884.387888 | 1766.761  | 2         |           |         |       | 1766.761917 | 120.02    | SEDFGVNEDLADSDAR         | 884.3879  | 886.4004  | 4.2             | 1.41            | 2.98              |
| 7        | 17          |             |                      | 884.387888 | 1766.761  | 2         |           |         |       | 1766.761917 | 108.64    | SEDFGVNEDLADSDAR         |           |           |                 |                 |                   |
| 7        | 17          |             |                      | 884.387888 | 1766.761  | 2         |           |         |       | 1766.761917 | 130.12    | SEDFGVNEDLADSDAR         |           |           |                 |                 |                   |
| 7        | 17          |             |                      | 804.746523 | 2411.218  | 3         |           |         |       | 2411.214523 | 46.18     | GGPGSAVSPYPTFNPSDDVAALHK |           |           |                 |                 |                   |
| 7        | 17          |             |                      | 804.746523 | 2411.218  | 3         |           |         |       | 2411.214523 | 39.26     | GGPGSAVSPYPTFNPSDDVAALHK |           |           |                 |                 |                   |
| 7        | 17          |             |                      | 804.746523 | 2411.218  | 3         |           |         |       | 2411.214523 | 32.02     | GGPGSAVSPYPTFNPSDDVAALHK |           |           |                 |                 |                   |
| 7        | 18          | IPI00216319 | 14-3-3 protein eta   | 468.280323 | 934.5461  | 2         | 1         | 1.96    | 0.00  | 934.551193  | 33.66     | NLLSVAYK                 |           |           |                 |                 |                   |
| 7        | 18          |             |                      | 480.292525 | 958.5705  | 2         |           |         |       | 958.572342  | 55.27     | VISSIEQK                 |           |           |                 |                 |                   |
| 7        | 18          |             |                      | 480.292536 | 958.5705  | 2         |           |         |       | 958.572342  | 24.72     | VISSIEQK                 |           |           |                 |                 |                   |
| 7        | 18          |             |                      | 482.2962   | 962.5778  | 2         |           |         |       | 962.582504  | 25.14     | NLLSVAYK                 |           |           |                 |                 |                   |
| 7        | 18          |             |                      | 482.2962   | 962.5778  | 2         |           |         |       | 962.582504  | 25.76     | NLLSVAYK                 |           |           |                 |                 |                   |
| 7        | 18          |             |                      | 609.350927 | 1216.687  | 2         |           |         |       | 1216.687393 | 80.79     | DSTLIMQLLR               |           |           |                 |                 |                   |
| 7        | 18          |             |                      | 609.350927 | 1216.687  | 2         |           |         |       | 1216.687393 | 75.96     | DSTLIMQLLR               |           |           |                 |                 |                   |
| 7        | 18          |             |                      | 609.351507 | 1216.688  | 2         |           |         |       | 1216.687393 | 80.5      | DSTLIMQLLR               |           |           |                 |                 |                   |
| 7        | 18          |             |                      | 609.351507 | 1216.688  | 2         |           |         |       | 1216.687393 | 85.72     | DSTLIMQLLR               |           |           |                 |                 |                   |
| 7        | 18          |             |                      | 609.3516   | 1216.689  | 2         |           |         |       | 1216.687393 | 88.41     | DSTLIMQLLR               |           |           |                 |                 |                   |
| 7        | 18          |             |                      | 609.351771 | 1216.689  | 2         |           |         |       | 1216.687393 | 88.55     | DSTLIMQLLR               |           |           |                 |                 |                   |
| 7        | 18          |             |                      | 617.348426 | 1232.682  | 2         |           |         |       | 1232.682312 | 74.9      | DSTLIMQLLR               |           |           |                 |                 |                   |
| 7        | 18          |             |                      | 617.348426 | 1232.682  | 2         |           |         |       | 1232.682312 | 77.05     | DSTLIMQLLR               |           |           |                 |                 |                   |
| 7        | 18          |             |                      | 617.348487 | 1232.682  | 2         |           |         |       | 1232.682312 | 74.53     | DSTLIMQLLR               |           |           |                 |                 |                   |
| 7        | 18          |             |                      | 617.348563 | 1232.683  | 2         |           |         |       | 1232.682312 | 77.13     | DSTLIMQLLR               |           |           |                 |                 |                   |
| 7        | 18          |             |                      | 617.348563 | 1232.683  | 2         |           |         |       | 1232.682312 | 59.79     | DSTLIMQLLR               |           |           |                 |                 |                   |
| 7        | 18          |             |                      | 617.348563 | 1232.683  | 2         |           |         |       | 1232.682312 | 33.56     | DSTLIMQLLR               |           |           |                 |                 |                   |
| 7        | 18          |             |                      | 617.348563 | 1232.683  | 2         |           |         |       | 1232.682312 | 74.86     | DSTLIMQLLR               |           |           |                 |                 |                   |
| 7        | 18          |             |                      | 617.348563 | 1232.683  | 2         |           |         |       | 1232.682312 | 70.49     | DSTLIMQLLR               |           |           |                 |                 |                   |
| 7        | 18          |             |                      | 807.90333  | 1613.792  | 2         |           |         |       | 1613.792099 | 86.87     | AVTELNEPLSNEDR           | 807.9033  | 809.9159  | 2.98            | 1.52            | 1.96              |
| 7        | 18          |             |                      | 807.90333  | 1613.792  | 2         |           |         |       | 1613.792099 | 51.92     | AVTELNEPLSNEDR           |           |           |                 |                 |                   |
| 7        | 19          | IPI00329801 | Annexin A5           | 491.790448 | 981.5663  | 2         | 1         | 3.64    | 0.00  | 981.567184  | 37.62     | FITIFGTR                 |           |           |                 |                 |                   |
| 7        | 19          |             |                      | 491.790468 | 981.5664  | 2         |           |         |       | 981.567184  | 28.87     | FITIFGTR                 |           |           |                 |                 |                   |
| 7        | 19          |             |                      | 567.812854 | 1133.611  | 2         |           |         |       | 1133.610504 | 55.03     | SEIDLNFIR                |           |           |                 |                 |                   |
| 7        | 19          |             |                      | 592.309072 | 1182.604  | 2         |           |         |       | 1182.601746 | 69.86     | GAGTDDHTLIR              |           |           |                 |                 |                   |
| 7        | 19          |             |                      | 592.309072 | 1182.604  | 2         |           |         |       | 1182.601746 | 66.58     | GAGTDDHTLIR              |           |           |                 |                 |                   |
| 7        | 19          |             |                      | 684.82538  | 1367.636  | 2         |           |         |       | 1367.638168 | 66.42     | GTVTDFPGFDER             | 684.8254  | 686.8379  | 11.6            | 3.19            | 3.64              |
| 7        | 19          |             |                      | 684.82538  | 1367.636  | 2         |           |         |       | 1367.638168 | 64.71     | GTVTDFPGFDER             |           |           |                 |                 |                   |
| 7        | 19          |             |                      | 821.476023 | 1640.937  | 2         |           |         |       | 1640.937286 | 78.3      | ETSGNLEQLLLAVVK          |           |           |                 |                 |                   |
| 7        | 19          |             |                      | 821.476023 | 1640.937  | 2         |           |         |       | 1640.937286 | 38.98     | ETSGNLEQLLLAVVK          |           |           |                 |                 |                   |
| 7        | 19          |             |                      | 835.490454 | 1668.966  | 2         |           |         |       | 1668.968597 | 103.86    | ETSGNLEQLLLAVVK          | 835.4905  | 837.503   | 11.2            | 0 L             |                   |
| 7        | 19          |             |                      | 866.971133 | 1731.928  | 2         |           |         |       | 1731.927872 | 129.56    | GLGTDEESILTLTISR         | 866.9712  | 870.9963  | 13.2            | 0 L             |                   |
| 7        | 19          |             |                      | 866.971163 | 1731.928  | 2         |           |         |       | 1731.927872 | 93.1      | GLGTDEESILTLTISR         |           |           |                 |                 |                   |
| 7        | 19          |             |                      | 866.971163 | 1731.928  | 2         |           |         |       | 1731.927872 | 134.83    | GLGTDEESILTLTISR         |           |           |                 |                 |                   |
| 7        | 19          |             |                      | 866.971163 | 1731.928  | 2         |           |         |       | 1731.927872 | 133.85    | GLGTDEESILTLTISR         |           |           |                 |                 |                   |
| 7        | 20          | IPI00013890 | 14-3-3 protein sigma | 468.280323 | 934.5461  | 2         | 1         | 1.38    | 0.00  | 934.551193  | 33.66     | NLLSVAYK                 |           |           |                 |                 |                   |
| 7        | 20          |             |                      | 480.292525 | 958.5705  | 2         |           |         |       | 958.572342  | 55.27     | VLSSIEQK                 |           |           |                 |                 |                   |
| 7        | 20          |             |                      | 480.292536 | 958.5705  | 2         |           |         |       | 958.572342  | 24.72     | VLSSIEQK                 |           |           |                 |                 |                   |
| 7        | 20          |             |                      | 482.2962   | 962.5778  | 2         |           |         |       | 962.582504  | 25.14     | NLLSVAYK                 |           |           |                 |                 |                   |
| 7        | 20          |             |                      | 482.2962   | 962.5778  | 2         |           |         |       | 962.582504  | 25.76     | NLLSVAYK                 |           |           |                 |                 |                   |
| 7        | 20          |             |                      | 609.350927 | 1216.687  | 2         |           |         |       | 1216.687393 | 80.79     | DSTLIMQLLR               |           |           |                 |                 |                   |
| 7        | 20          |             |                      | 609.350927 | 1216.687  | 2         |           |         |       | 1216.687393 | 75.96     | DSTLIMQLLR               |           |           |                 |                 |                   |
| 7        | 20          |             |                      | 609.351507 | 1216.688  | 2         |           |         |       | 1216.687393 | 80.5      | DSTLIMQLLR               |           |           |                 |                 |                   |
| 7        | 20          |             |                      | 609.351507 | 1216.688  | 2         |           |         |       | 1216.687393 | 85.72     | DSTLIMQLLR               |           |           |                 |                 |                   |
| 7        | 20          |             |                      | 609.3516   | 1216.689  | 2         |           |         |       | 1216.687393 | 88.41     | DSTLIMQLLR               |           |           |                 |                 |                   |
| 7        | 20          |             |                      | 609.351771 | 1216.689  | 2         |           |         |       | 1216.687393 | 88.55     | DSTLIMQLLR               |           |           |                 |                 |                   |
| 7        | 20          |             |                      | 617.348426 | 1232.682  | 2         |           |         |       | 1232.682312 | 74.9      | DSTLIMQLLR               |           |           |                 |                 |                   |
| 7        | 20          |             |                      | 617.348426 | 1232.682  | 2         |           |         |       | 1232.682312 | 77.05     | DSTLIMQLLR               |           |           |                 |                 |                   |
| 7        | 20          |             |                      | 617.348487 | 1232.682  | 2         |           |         |       | 1232.682312 | 74.53     | DSTLIMQLLR               |           |           |                 |                 |                   |
| 7        | 20          |             |                      | 617.348563 | 1232.683  | 2         |           |         |       | 1232.682312 | 77.13     | DSTLIMQLLR               |           |           |                 |                 |                   |
| 7        | 20          |             |                      | 617.348563 | 1232.683  | 2         |           |         |       | 1232.682312 | 59.79     | DSTLIMQLLR               |           |           |                 |                 |                   |
| 7        | 20          |             |                      | 617.348563 | 1232.683  | 2         |           |         |       | 1232.682312 | 33.56     | DSTLIMQLLR               |           |           |                 |                 |                   |
| 7        | 20          |             |                      | 617.348563 | 1232.683  | 2         |           |         |       | 1232.682312 | 74.86     | DSTLIMQLLR               |           |           |                 |                 |                   |
| 7        | 20          |             |                      | 617.348563 | 1232.683  | 2         |           |         |       | 1232.682312 | 70.49     | DSTLIMQLLR               |           |           |                 |                 |                   |
| 7        | 20          |             |                      | 810.881964 | 1619.749  | 2         |           |         |       | 1619.748489 | 48.08     | GAVEKGEELSCSEER          | 810.882   | 812.8945  | 0.29            | 0.21            | 1.38              |
| 7        | 20          | IPI00411765 | SFN protein          | 468.280323 | 934.5461  | 2         | 1         | 1.38    | 0.00  | 934.551193  | 33.66     | NLLSVAYK                 |           |           |                 |                 |                   |



| Band num | prot_hit_nu | prot_acc    | prot_desc                  | pep_exp_mz | pep_exp_n | pep_exp_z | quantific | average | stdev | pep_calc_mr | pep_score | pep_seq                | light m/z | heavy m/z | light intensity | heavy intensity | ratio light/heavy |
|----------|-------------|-------------|----------------------------|------------|-----------|-----------|-----------|---------|-------|-------------|-----------|------------------------|-----------|-----------|-----------------|-----------------|-------------------|
| 7        | 20          |             |                            | 480.292525 | 958.5705  | 2         |           |         |       | 958.572342  | 55.27     | VLSSIEQK               |           |           |                 |                 |                   |
| 7        | 20          |             |                            | 480.292536 | 958.5705  | 2         |           |         |       | 958.572342  | 24.72     | VLSSIEQK               |           |           |                 |                 |                   |
| 7        | 20          |             |                            | 482.2962   | 962.5778  | 2         |           |         |       | 962.582504  | 25.14     | NLLSVAYK               |           |           |                 |                 |                   |
| 7        | 20          |             |                            | 482.2962   | 962.5778  | 2         |           |         |       | 962.582504  | 25.76     | NLLSVAYK               |           |           |                 |                 |                   |
| 7        | 20          |             |                            | 609.350927 | 1216.687  | 2         |           |         |       | 1216.687393 | 80.79     | DSTLMQLLR              |           |           |                 |                 |                   |
| 7        | 20          |             |                            | 609.350927 | 1216.687  | 2         |           |         |       | 1216.687393 | 75.96     | DSTLMQLLR              |           |           |                 |                 |                   |
| 7        | 20          |             |                            | 609.351507 | 1216.688  | 2         |           |         |       | 1216.687393 | 80.5      | DSTLMQLLR              |           |           |                 |                 |                   |
| 7        | 20          |             |                            | 609.351507 | 1216.688  | 2         |           |         |       | 1216.687393 | 85.72     | DSTLMQLLR              |           |           |                 |                 |                   |
| 7        | 20          |             |                            | 609.3516   | 1216.689  | 2         |           |         |       | 1216.687393 | 88.41     | DSTLMQLLR              |           |           |                 |                 |                   |
| 7        | 20          |             |                            | 609.351771 | 1216.689  | 2         |           |         |       | 1216.687393 | 88.55     | DSTLMQLLR              |           |           |                 |                 |                   |
| 7        | 20          |             |                            | 617.348426 | 1232.682  | 2         |           |         |       | 1232.682312 | 74.9      | DSTLMQLLR              |           |           |                 |                 |                   |
| 7        | 20          |             |                            | 617.348426 | 1232.682  | 2         |           |         |       | 1232.682312 | 77.05     | DSTLMQLLR              |           |           |                 |                 |                   |
| 7        | 20          |             |                            | 617.348487 | 1232.682  | 2         |           |         |       | 1232.682312 | 74.53     | DSTLMQLLR              |           |           |                 |                 |                   |
| 7        | 20          |             |                            | 617.348563 | 1232.683  | 2         |           |         |       | 1232.682312 | 77.13     | DSTLMQLLR              |           |           |                 |                 |                   |
| 7        | 20          |             |                            | 617.348563 | 1232.683  | 2         |           |         |       | 1232.682312 | 59.79     | DSTLMQLLR              |           |           |                 |                 |                   |
| 7        | 20          |             |                            | 617.348563 | 1232.683  | 2         |           |         |       | 1232.682312 | 33.56     | DSTLMQLLR              |           |           |                 |                 |                   |
| 7        | 20          |             |                            | 617.348563 | 1232.683  | 2         |           |         |       | 1232.682312 | 74.86     | DSTLMQLLR              |           |           |                 |                 |                   |
| 7        | 20          |             |                            | 617.348563 | 1232.683  | 2         |           |         |       | 1232.682312 | 70.49     | DSTLMQLLR              |           |           |                 |                 |                   |
| 7        | 20          |             |                            | 810.881964 | 1619.749  | 2         |           |         |       | 1619.748489 | 48.08     | GAVEKGEELSCEER         |           |           |                 |                 |                   |
| 7        | 21          | IPI00003348 | Guanine nucleotide-binding | 346.210782 | 690.407   | 2         | 3         | 7.91    | 2.27  | 690.408905  | 21.07     | LFDLR                  |           |           |                 |                 |                   |
| 7        | 21          |             |                            | 417.270166 | 832.5258  | 2         |           |         |       | 832.530746  | 25.6      | VHAIPLR                |           |           |                 |                 |                   |
| 7        | 21          |             |                            | 519.278344 | 1036.542  | 2         |           |         |       | 1036.543808 | 42.42     | AGVLAGHDNR             |           |           |                 |                 |                   |
| 7        | 21          |             |                            | 346.521427 | 1036.542  | 3         |           |         |       | 1036.543808 | 44.42     | AGVLAGHDNR             |           |           |                 |                 |                   |
| 7        | 21          |             |                            | 523.296547 | 1044.579  | 2         |           |         |       | 1044.583954 | 22.97     | LLVSASQDGK             |           |           |                 |                 |                   |
| 7        | 21          |             |                            | 523.296547 | 1044.579  | 2         |           |         |       | 1044.583954 | 34        | LLVSASQDGK             |           |           |                 |                 |                   |
| 7        | 21          |             |                            | 537.312647 | 1072.611  | 2         |           |         |       | 1072.615265 | 37.94     | LLVSASQDGK             | 537.3127  | 541.3378  | 27.1            | 4.8             | 5.65              |
| 7        | 21          |             |                            | 642.31858  | 1282.623  | 2         |           |         |       | 1282.625168 | 61.83     | TFVSGACDASIK           |           |           |                 |                 |                   |
| 7        | 21          |             |                            | 642.31858  | 1282.623  | 2         |           |         |       | 1282.625168 | 64.7      | TFVSGACDASIK           |           |           |                 |                 |                   |
| 7        | 21          |             |                            | 656.334087 | 1310.654  | 2         |           |         |       | 1310.656479 | 63.72     | TFVSGACDASIK           |           |           |                 |                 |                   |
| 7        | 21          |             |                            | 656.334087 | 1310.654  | 2         |           |         |       | 1310.656479 | 74.35     | TFVSGACDASIK           | 656.3341  | 660.3592  | 8.86            | 0.87            | 10.18             |
| 7        | 21          |             |                            | 455.551406 | 1363.632  | 3         |           |         |       | 1363.636749 | 27.56     | IYAMHWGTDSR            |           |           |                 |                 |                   |
| 7        | 21          |             |                            | 455.551436 | 1363.632  | 3         |           |         |       | 1363.636749 | 20.21     | IYAMHWGTDSR            |           |           |                 |                 |                   |
| 7        | 21          |             |                            | 705.389966 | 1408.765  | 2         |           |         |       | 1408.76268  | 41.16     | LIWDSYTTNK             | 705.39    | 709.4151  | 10.5            | 1.33            | 7.89              |
| 7        | 21          |             |                            | 705.389966 | 1408.765  | 2         |           |         |       | 1408.76268  | 45.72     | LIWDSYTTNK             |           |           |                 |                 |                   |
| 7        | 21          |             |                            | 705.390016 | 1408.765  | 2         |           |         |       | 1408.76268  | 45.72     | LIWDSYTTNK             |           |           |                 |                 |                   |
| 7        | 21          |             |                            | 526.576701 | 1576.708  | 3         |           |         |       | 1576.715073 | 35.77     | ELPGHTGYLSCCR          |           |           |                 |                 |                   |
| 7        | 21          |             |                            | 526.576701 | 1576.708  | 3         |           |         |       | 1576.715073 | 36.15     | ELPGHTGYLSCCR          |           |           |                 |                 |                   |
| 7        | 21          |             |                            | 980.499836 | 1958.985  | 2         |           |         |       | 1958.975571 | 99.51     | ACGDSTLTQITAGLDPVGR    |           |           |                 |                 |                   |
| 7        | 21          |             |                            | 980.499836 | 1958.985  | 2         |           |         |       | 1958.975571 | 104.33    | ACGDSTLTQITAGLDPVGR    |           |           |                 |                 |                   |
| 7        | 22          | IPI00337415 | Guanine nucleotide-binding | 469.230428 | 936.4463  | 2         | 2         | 4.04    | 0.63  | 936.451157  | 41.88     | MFDVGGQR               | 469.2304  | 471.243   | 18              | 4.01            | 4.49              |
| 7        | 22          |             |                            | 469.23043  | 936.4463  | 2         |           |         |       | 936.451157  | 30.63     | MFDVGGQR               |           |           |                 |                 |                   |
| 7        | 22          |             |                            | 479.596891 | 1435.769  | 3         |           |         |       | 1435.77356  | 39.86     | TTGIVETHFTFK           |           |           |                 |                 |                   |
| 7        | 22          |             |                            | 807.877206 | 1613.74   | 2         |           |         |       | 1613.74202  | 61.01     | EIYTHFTCATDTK          |           |           |                 |                 |                   |
| 7        | 22          |             |                            | 807.877206 | 1613.74   | 2         |           |         |       | 1613.74202  | 62.88     | EIYTHFTCATDTK          |           |           |                 |                 |                   |
| 7        | 22          |             |                            | 807.877206 | 1613.74   | 2         |           |         |       | 1613.74202  | 55.28     | EIYTHFTCATDTK          |           |           |                 |                 |                   |
| 7        | 22          |             |                            | 548.263231 | 1641.768  | 3         |           |         |       | 1641.773331 | 46.07     | EIYTHFTCATDTK          |           |           |                 |                 |                   |
| 7        | 22          |             |                            | 548.263231 | 1641.768  | 3         |           |         |       | 1641.773331 | 32.36     | EIYTHFTCATDTK          |           |           |                 |                 |                   |
| 7        | 22          |             |                            | 548.263231 | 1641.768  | 3         |           |         |       | 1641.773331 | 31.64     | EIYTHFTCATDTK          |           |           |                 |                 |                   |
| 7        | 22          |             |                            | 821.89237  | 1641.77   | 2         |           |         |       | 1641.773331 | 46.9      | EIYTHFTCATDTK          | 821.8924  | 825.9175  | 2.77            | 0.77            | 3.60              |
| 7        | 22          |             |                            | 821.89237  | 1641.77   | 2         |           |         |       | 1641.773331 | 53.39     | EIYTHFTCATDTK          |           |           |                 |                 |                   |
| 7        | 22          |             |                            | 821.89237  | 1641.77   | 2         |           |         |       | 1641.773331 | 72.44     | EIYTHFTCATDTK          |           |           |                 |                 |                   |
| 7        | 22          |             |                            | 821.89237  | 1641.77   | 2         |           |         |       | 1641.773331 | 22.66     | EIYTHFTCATDTK          |           |           |                 |                 |                   |
| 7        | 22          |             |                            | 882.50075  | 1762.987  | 2         |           |         |       | 1762.989334 | 71.55     | NVQFVDAVTDVIK          |           |           |                 |                 |                   |
| 7        | 22          |             |                            | 882.50075  | 1762.987  | 2         |           |         |       | 1762.989334 | 20.98     | NVQFVDAVTDVIK          |           |           |                 |                 |                   |
| 7        | 22          |             |                            | 892.489305 | 1782.964  | 2         |           |         |       | 1782.965271 | 22.5      | IAQPNYIPTQQDVLR        |           |           |                 |                 |                   |
| 7        | 22          |             |                            | 813.106163 | 2436.297  | 3         |           |         |       | 2436.299789 | 20.59     | QLFVLGAAEEGFMTAELAGVIK |           |           |                 |                 |                   |
| 7        | 22          | IPI00746986 | 41 kDa protein             | 469.230428 | 936.4463  | 2         | 2         | 4.04    | 0.63  | 936.451157  | 41.88     | MFDVGGQR               |           |           |                 |                 |                   |
| 7        | 22          |             |                            | 469.23043  | 936.4463  | 2         |           |         |       | 936.451157  | 30.63     | MFDVGGQR               |           |           |                 |                 |                   |
| 7        | 22          |             |                            | 479.596891 | 1435.769  | 3         |           |         |       | 1435.77356  | 39.86     | TTGIVETHFTFK           |           |           |                 |                 |                   |
| 7        | 22          |             |                            | 807.877206 | 1613.74   | 2         |           |         |       | 1613.74202  | 61.01     | EIYTHFTCATDTK          |           |           |                 |                 |                   |
| 7        | 22          |             |                            | 807.877206 | 1613.74   | 2         |           |         |       | 1613.74202  | 62.88     | EIYTHFTCATDTK          |           |           |                 |                 |                   |
| 7        | 22          |             |                            | 807.877206 | 1613.74   | 2         |           |         |       | 1613.74202  | 55.28     | EIYTHFTCATDTK          |           |           |                 |                 |                   |
| 7        | 22          |             |                            | 548.263231 | 1641.768  | 3         |           |         |       | 1641.773331 | 46.07     | EIYTHFTCATDTK          |           |           |                 |                 |                   |

| Band num | prot_hit_nu | prot_acc    | prot_desc                   | pep_exp_mz | pep_exp_n | pep_exp_z | quantific | average | stdev | pep_calc_mr | pep_score | pep_seq                 | light m/z | heavy m/z | light intensity | heavy intensity | ratio light/heavy |
|----------|-------------|-------------|-----------------------------|------------|-----------|-----------|-----------|---------|-------|-------------|-----------|-------------------------|-----------|-----------|-----------------|-----------------|-------------------|
| 7        | 22          |             |                             | 548.263231 | 1641.768  | 3         |           |         |       | 1641.773331 | 32.36     | EIYTHFTCATDTK           |           |           |                 |                 |                   |
| 7        | 22          |             |                             | 548.263231 | 1641.768  | 3         |           |         |       | 1641.773331 | 31.64     | EIYTHFTCATDTK           |           |           |                 |                 |                   |
| 7        | 22          |             |                             | 821.89237  | 1641.77   | 2         |           |         |       | 1641.773331 | 46.9      | EIYTHFTCATDTK           |           |           |                 |                 |                   |
| 7        | 22          |             |                             | 821.89237  | 1641.77   | 2         |           |         |       | 1641.773331 | 53.39     | EIYTHFTCATDTK           |           |           |                 |                 |                   |
| 7        | 22          |             |                             | 821.89237  | 1641.77   | 2         |           |         |       | 1641.773331 | 72.44     | EIYTHFTCATDTK           |           |           |                 |                 |                   |
| 7        | 22          |             |                             | 821.89237  | 1641.77   | 2         |           |         |       | 1641.773331 | 22.66     | EIYTHFTCATDTK           |           |           |                 |                 |                   |
| 7        | 22          |             |                             | 882.50075  | 1762.987  | 2         |           |         |       | 1762.989334 | 71.55     | NVQVFVDAVTDVIIK         |           |           |                 |                 |                   |
| 7        | 22          |             |                             | 882.50075  | 1762.987  | 2         |           |         |       | 1762.989334 | 20.98     | NVQVFVDAVTDVIIK         |           |           |                 |                 |                   |
| 7        | 22          |             |                             | 892.489305 | 1782.964  | 2         |           |         |       | 1782.965271 | 22.5      | IAQPNYIPTQQDVLK         |           |           |                 |                 |                   |
| 7        | 22          |             |                             | 813.106163 | 2436.297  | 3         |           |         |       | 2436.299789 | 20.59     | QLFVLGAAEEGFMATAELAGVIK |           |           |                 |                 |                   |
| 7        | 23          | IPI00306195 | CDNA FLJ30949 fis, clone    | 300.215306 | 598.4161  | 2         | 2         | 9.93    | 1.20  | 598.419067  | 36.96     | ALVLR                   | 300.2153  | 302.2279  | 79.4            | 7.37            | 10.77             |
| 7        | 23          |             |                             | 504.770561 | 1007.527  | 2         |           |         |       | 1007.531219 | 32.34     | LNTSDFQK                | 504.7706  | 508.7957  | 3.45            | 0.38            | 9.08              |
| 7        | 23          |             |                             | 586.631303 | 1756.872  | 3         |           |         |       | 1756.876831 | 44.02     | EAEDTQVFGDLPRPR         |           |           |                 |                 |                   |
| 7        | 23          |             |                             | 586.631303 | 1756.872  | 3         |           |         |       | 1756.876831 | 57.19     | EAEDTQVFGDLPRPR         |           |           |                 |                 |                   |
| 7        | 23          |             |                             | 586.631303 | 1756.872  | 3         |           |         |       | 1756.876831 | 42.7      | EAEDTQVFGDLPRPR         |           |           |                 |                 |                   |
| 7        | 23          |             |                             | 586.631303 | 1756.872  | 3         |           |         |       | 1756.876831 | 48.48     | EAEDTQVFGDLPRPR         |           |           |                 |                 |                   |
| 7        | 23          |             |                             | 879.446413 | 1756.878  | 2         |           |         |       | 1756.876831 | 46.28     | EAEDTQVFGDLPRPR         |           |           |                 |                 |                   |
| 7        | 23          |             |                             | 879.446413 | 1756.878  | 2         |           |         |       | 1756.876831 | 79.73     | EAEDTQVFGDLPRPR         |           |           |                 |                 |                   |
| 7        | 23          |             |                             | 879.446413 | 1756.878  | 2         |           |         |       | 1756.876831 | 45.15     | EAEDTQVFGDLPRPR         |           |           |                 |                 |                   |
| 7        | 23          |             |                             | 879.446413 | 1756.878  | 2         |           |         |       | 1756.876831 | 58.8      | EAEDTQVFGDLPRPR         |           |           |                 |                 |                   |
| 7        | 23          |             |                             | 696.021121 | 2085.042  | 3         |           |         |       | 2085.033691 | 35.55     | MASGRPEELWEAVVGAER      |           |           |                 |                 |                   |
| 7        | 23          |             |                             | 696.021338 | 2085.042  | 3         |           |         |       | 2085.033691 | 43.8      | MASGRPEELWEAVVGAER      |           |           |                 |                 |                   |
| 7        | 23          |             |                             | 696.021536 | 2085.043  | 3         |           |         |       | 2085.033691 | 75.96     | MASGRPEELWEAVVGAER      |           |           |                 |                 |                   |
| 7        | 23          | IPI00549786 | AKT1S1 protein              | 300.215306 | 598.4161  | 2         | 2         | 9.93    | 1.20  | 598.419067  | 36.96     | ALVLR                   |           |           |                 |                 |                   |
| 7        | 23          |             |                             | 504.770561 | 1007.527  | 2         |           |         |       | 1007.531219 | 32.34     | LNTSDFQK                |           |           |                 |                 |                   |
| 7        | 23          |             |                             | 586.631303 | 1756.872  | 3         |           |         |       | 1756.876831 | 44.02     | EAEDTQVFGDLPRPR         |           |           |                 |                 |                   |
| 7        | 23          |             |                             | 586.631303 | 1756.872  | 3         |           |         |       | 1756.876831 | 57.19     | EAEDTQVFGDLPRPR         |           |           |                 |                 |                   |
| 7        | 23          |             |                             | 586.631303 | 1756.872  | 3         |           |         |       | 1756.876831 | 42.7      | EAEDTQVFGDLPRPR         |           |           |                 |                 |                   |
| 7        | 23          |             |                             | 586.631303 | 1756.872  | 3         |           |         |       | 1756.876831 | 48.48     | EAEDTQVFGDLPRPR         |           |           |                 |                 |                   |
| 7        | 23          |             |                             | 879.446413 | 1756.878  | 2         |           |         |       | 1756.876831 | 46.28     | EAEDTQVFGDLPRPR         |           |           |                 |                 |                   |
| 7        | 23          |             |                             | 879.446413 | 1756.878  | 2         |           |         |       | 1756.876831 | 79.73     | EAEDTQVFGDLPRPR         |           |           |                 |                 |                   |
| 7        | 23          |             |                             | 879.446413 | 1756.878  | 2         |           |         |       | 1756.876831 | 45.15     | EAEDTQVFGDLPRPR         |           |           |                 |                 |                   |
| 7        | 23          |             |                             | 879.446413 | 1756.878  | 2         |           |         |       | 1756.876831 | 58.8      | EAEDTQVFGDLPRPR         |           |           |                 |                 |                   |
| 7        | 23          |             |                             | 696.021121 | 2085.042  | 3         |           |         |       | 2085.033691 | 35.55     | MASGRPEELWEAVVGAER      |           |           |                 |                 |                   |
| 7        | 23          |             |                             | 696.021338 | 2085.042  | 3         |           |         |       | 2085.033691 | 43.8      | MASGRPEELWEAVVGAER      |           |           |                 |                 |                   |
| 7        | 23          |             |                             | 696.021536 | 2085.043  | 3         |           |         |       | 2085.033691 | 75.96     | MASGRPEELWEAVVGAER      |           |           |                 |                 |                   |
| 7        | 24          | IPI00641950 | Lung cancer oncogene 7      | 669.340164 | 1336.666  | 2         | 1         | 4.74    | 0.00  | 1336.664719 | 54.31     | DVLSVAFSSDNR            | 669.3402  | 671.3527  | 15.2            | 3.21            | 4.74              |
| 7        | 24          |             |                             | 669.340164 | 1336.666  | 2         |           |         |       | 1336.664719 | 64.06     | DVLSVAFSSDNR            |           |           |                 |                 |                   |
| 7        | 24          |             |                             | 1005.45562 | 2008.897  | 2         |           |         |       | 2008.897324 | 86.78     | YTVQDESHSEWVSCVR        | 1005.456  | 1007.468  | 1.36            | 0 L             |                   |
| 7        | 24          |             |                             | 1005.45562 | 2008.897  | 2         |           |         |       | 2008.897324 | 81.16     | YTVQDESHSEWVSCVR        |           |           |                 |                 |                   |
| 7        | 24          |             |                             | 670.639935 | 2008.898  | 3         |           |         |       | 2008.897324 | 42.97     | YTVQDESHSEWVSCVR        |           |           |                 |                 |                   |
| 7        | 24          |             |                             | 670.639935 | 2008.898  | 3         |           |         |       | 2008.897324 | 73.13     | YTVQDESHSEWVSCVR        |           |           |                 |                 |                   |
| 7        | 24          | IPI00784408 | Proliferation-inducing gene | 669.340164 | 1336.666  | 2         | 1         | 4.74    | 0.00  | 1336.664719 | 54.31     | DVLSVAFSSDNR            |           |           |                 |                 |                   |
| 7        | 24          |             |                             | 669.340164 | 1336.666  | 2         |           |         |       | 1336.664719 | 64.06     | DVLSVAFSSDNR            |           |           |                 |                 |                   |
| 7        | 24          |             |                             | 1005.45562 | 2008.897  | 2         |           |         |       | 2008.897324 | 86.78     | YTVQDESHSEWVSCVR        |           |           |                 |                 |                   |
| 7        | 24          |             |                             | 1005.45562 | 2008.897  | 2         |           |         |       | 2008.897324 | 81.16     | YTVQDESHSEWVSCVR        |           |           |                 |                 |                   |
| 7        | 24          |             |                             | 670.639935 | 2008.898  | 3         |           |         |       | 2008.897324 | 42.97     | YTVQDESHSEWVSCVR        |           |           |                 |                 |                   |
| 7        | 24          |             |                             | 670.639935 | 2008.898  | 3         |           |         |       | 2008.897324 | 73.13     | YTVQDESHSEWVSCVR        |           |           |                 |                 |                   |
| 7        | 25          | IPI00178083 | 29 kDa protein              | 636.346476 | 1270.678  | 2         | 3         | 3.53    | 1.03  | 1270.679306 | 44.67     | IQLVEEELDR              | 636.3465  | 638.359   | 19.8            | 5.66            | 3.50              |
| 7        | 25          |             |                             | 672.841412 | 1343.668  | 2         |           |         |       | 1343.670517 | 66.26     | EQAEEVASLNR             | 672.8414  | 674.854   | 4.72            | 1.03            | 4.58              |
| 7        | 25          |             |                             | 821.9058   | 1641.797  | 2         |           |         |       | 1641.795792 | 30.1      | IQLVQQQADDAEER          |           |           |                 |                 |                   |
| 7        | 25          |             |                             | 821.9058   | 1641.797  | 2         |           |         |       | 1641.795792 | 34.61     | IQLVQQQADDAEER          |           |           |                 |                 |                   |
| 7        | 25          |             |                             | 835.92043  | 1669.826  | 2         |           |         |       | 1669.829559 | 90.84     | IQLVQQQADDAEER          | 835.9204  | 837.933   | 3.96            | 1.57            | 2.52              |
| 7        | 25          |             |                             | 835.92043  | 1669.826  | 2         |           |         |       | 1669.829559 | 85.06     | IQLVQQQADDAEER          |           |           |                 |                 |                   |
| 7        | 25          |             |                             | 835.92043  | 1669.826  | 2         |           |         |       | 1669.829559 | 96.84     | IQLVQQQADDAEER          |           |           |                 |                 |                   |
| 7        | 25          | IPI00218319 | tropomyosin 3 isoform 2     | 636.346476 | 1270.678  | 2         | 3         | 3.53    | 1.03  | 1270.679306 | 44.67     | IQLVEEELDR              |           |           |                 |                 |                   |
| 7        | 25          |             |                             | 672.841412 | 1343.668  | 2         |           |         |       | 1343.670517 | 66.26     | EQAEEVASLNR             |           |           |                 |                 |                   |
| 7        | 25          |             |                             | 821.9058   | 1641.797  | 2         |           |         |       | 1641.795792 | 30.1      | IQLVQQQADDAEER          |           |           |                 |                 |                   |
| 7        | 25          |             |                             | 821.9058   | 1641.797  | 2         |           |         |       | 1641.795792 | 34.61     | IQLVQQQADDAEER          |           |           |                 |                 |                   |
| 7        | 25          |             |                             | 835.92043  | 1669.826  | 2         |           |         |       | 1669.829559 | 90.84     | IQLVQQQADDAEER          |           |           |                 |                 |                   |
| 7        | 25          |             |                             | 835.92043  | 1669.826  | 2         |           |         |       | 1669.829559 | 85.06     | IQLVQQQADDAEER          |           |           |                 |                 |                   |
| 7        | 25          |             |                             | 835.92043  | 1669.826  | 2         |           |         |       | 1669.829559 | 96.84     | IQLVQQQADDAEER          |           |           |                 |                 |                   |
| 7        | 25          | IPI00382894 | Tropomyosin 3               | 636.346476 | 1270.678  | 2         | 3         | 3.53    | 1.03  | 1270.679306 | 44.67     | IQLVEEELDR              |           |           |                 |                 |                   |

| Band num | prot_hit_nu | prot_acc    | prot_desc                   | pep_exp_mz | pep_exp_n | pep_exp_z | quantific | average | stdev | pep_calc_mr | pep_score | pep_seq           | light m/z | heavy m/z | light intensity | heavy intensity | ratio light/heavy |
|----------|-------------|-------------|-----------------------------|------------|-----------|-----------|-----------|---------|-------|-------------|-----------|-------------------|-----------|-----------|-----------------|-----------------|-------------------|
| 7        | 25          |             |                             | 672.841412 | 1343.668  | 2         |           |         |       | 1343.670517 | 66.26     | EQAEAEVASLNR      |           |           |                 |                 |                   |
| 7        | 25          |             |                             | 821.9058   | 1641.797  | 2         |           |         |       | 1641.795792 | 30.1      | IQVLQQQADDAEER    |           |           |                 |                 |                   |
| 7        | 25          |             |                             | 821.9058   | 1641.797  | 2         |           |         |       | 1641.795792 | 34.61     | IQVLQQQADDAEER    |           |           |                 |                 |                   |
| 7        | 25          |             |                             | 835.92043  | 1669.826  | 2         |           |         |       | 1669.829559 | 90.84     | IQVLQQQADDAEER    |           |           |                 |                 |                   |
| 7        | 25          |             |                             | 835.92043  | 1669.826  | 2         |           |         |       | 1669.829559 | 85.06     | IQVLQQQADDAEER    |           |           |                 |                 |                   |
| 7        | 25          |             |                             | 835.92043  | 1669.826  | 2         |           |         |       | 1669.829559 | 96.84     | IQVLQQQADDAEER    |           |           |                 |                 |                   |
| 7        | 25          | IPI00477649 | tropomyosin 3 isoform 5     | 636.346476 | 1270.678  | 2         | 3         | 3.53    | 1.03  | 1270.679306 | 44.67     | IQLVEEELDR        |           |           |                 |                 |                   |
| 7        | 25          |             |                             | 672.841412 | 1343.668  | 2         |           |         |       | 1343.670517 | 66.26     | EQAEAEVASLNR      |           |           |                 |                 |                   |
| 7        | 25          |             |                             | 821.9058   | 1641.797  | 2         |           |         |       | 1641.795792 | 30.1      | IQVLQQQADDAEER    |           |           |                 |                 |                   |
| 7        | 25          |             |                             | 821.9058   | 1641.797  | 2         |           |         |       | 1641.795792 | 34.61     | IQVLQQQADDAEER    |           |           |                 |                 |                   |
| 7        | 25          |             |                             | 835.92043  | 1669.826  | 2         |           |         |       | 1669.829559 | 90.84     | IQVLQQQADDAEER    |           |           |                 |                 |                   |
| 7        | 25          |             |                             | 835.92043  | 1669.826  | 2         |           |         |       | 1669.829559 | 85.06     | IQVLQQQADDAEER    |           |           |                 |                 |                   |
| 7        | 25          |             |                             | 835.92043  | 1669.826  | 2         |           |         |       | 1669.829559 | 96.84     | IQVLQQQADDAEER    |           |           |                 |                 |                   |
| 7        | 25          | IPI00479185 | tropomyosin 3 isoform 4     | 636.346476 | 1270.678  | 2         | 3         | 3.53    | 1.03  | 1270.679306 | 44.67     | IQLVEEELDR        |           |           |                 |                 |                   |
| 7        | 25          |             |                             | 672.841412 | 1343.668  | 2         |           |         |       | 1343.670517 | 66.26     | EQAEAEVASLNR      |           |           |                 |                 |                   |
| 7        | 25          |             |                             | 821.9058   | 1641.797  | 2         |           |         |       | 1641.795792 | 30.1      | IQVLQQQADDAEER    |           |           |                 |                 |                   |
| 7        | 25          |             |                             | 821.9058   | 1641.797  | 2         |           |         |       | 1641.795792 | 34.61     | IQVLQQQADDAEER    |           |           |                 |                 |                   |
| 7        | 25          |             |                             | 835.92043  | 1669.826  | 2         |           |         |       | 1669.829559 | 90.84     | IQVLQQQADDAEER    |           |           |                 |                 |                   |
| 7        | 25          |             |                             | 835.92043  | 1669.826  | 2         |           |         |       | 1669.829559 | 85.06     | IQVLQQQADDAEER    |           |           |                 |                 |                   |
| 7        | 25          |             |                             | 835.92043  | 1669.826  | 2         |           |         |       | 1669.829559 | 96.84     | IQVLQQQADDAEER    |           |           |                 |                 |                   |
| 7        | 25          | IPI00642042 | Hypothetical protein DKFZ   | 636.346476 | 1270.678  | 2         | 3         | 3.53    | 1.03  | 1270.679306 | 44.67     | IQLVEEELDR        |           |           |                 |                 |                   |
| 7        | 25          |             |                             | 672.841412 | 1343.668  | 2         |           |         |       | 1343.670517 | 66.26     | EQAEAEVASLNR      |           |           |                 |                 |                   |
| 7        | 25          |             |                             | 821.9058   | 1641.797  | 2         |           |         |       | 1641.795792 | 30.1      | IQVLQQQADDAEER    |           |           |                 |                 |                   |
| 7        | 25          |             |                             | 821.9058   | 1641.797  | 2         |           |         |       | 1641.795792 | 34.61     | IQVLQQQADDAEER    |           |           |                 |                 |                   |
| 7        | 25          |             |                             | 835.92043  | 1669.826  | 2         |           |         |       | 1669.829559 | 90.84     | IQVLQQQADDAEER    |           |           |                 |                 |                   |
| 7        | 25          |             |                             | 835.92043  | 1669.826  | 2         |           |         |       | 1669.829559 | 85.06     | IQVLQQQADDAEER    |           |           |                 |                 |                   |
| 7        | 25          |             |                             | 835.92043  | 1669.826  | 2         |           |         |       | 1669.829559 | 96.84     | IQVLQQQADDAEER    |           |           |                 |                 |                   |
| 7        | 26          | IPI00291005 | Malate dehydrogenase, cy    | 596.819025 | 1191.623  | 2         | 2         | 4.40    | 0.24  | 1191.627213 | 68.33     | GEFVTTVQQR        | 596.819   | 598.8316  | 4.52            | 0.99            | 4.57              |
| 7        | 26          |             |                             | 631.380678 | 1260.747  | 2         |           |         |       | 1260.746613 | 35.27     | IFKSQGAALDK       |           |           |                 |                 |                   |
| 7        | 26          |             |                             | 711.378303 | 1420.742  | 2         |           |         |       | 1420.737473 | 32.25     | FVEGLPINDFSR      |           |           |                 |                 |                   |
| 7        | 26          |             |                             | 711.378303 | 1420.742  | 2         |           |         |       | 1420.737473 | 26.63     | FVEGLPINDFSR      |           |           |                 |                 |                   |
| 7        | 26          |             |                             | 907.497829 | 1812.981  | 2         |           |         |       | 1812.979187 | 55.9      | VIVVGNPANTNCLTASK | 907.4982  | 911.5233  | 2.03            | 0.48            | 4.23              |
| 7        | 26          |             |                             | 907.498188 | 1812.982  | 2         |           |         |       | 1812.979187 | 126.08    | VIVVGNPANTNCLTASK |           |           |                 |                 |                   |
| 7        | 26          |             |                             | 907.498188 | 1812.982  | 2         |           |         |       | 1812.979187 | 81.34     | VIVVGNPANTNCLTASK |           |           |                 |                 |                   |
| 7        | 27          | IPI00398958 | Ribosomal protein SA        | 738.454888 | 1474.895  | 2         | 1         | 3.45    | 0.00  | 1474.889572 | 20.41     | RKSDGIYIINLK      | 738.4549  | 742.48    | 11.7            | 0 L             |                   |
| 7        | 27          |             |                             | 884.996995 | 1767.979  | 2         |           |         |       | 1767.975464 | 102.69    | AIVAIENPADVSVISSR | 884.997   | 887.0096  | 13.4            | 3.88            | 3.45              |
| 7        | 27          |             |                             | 884.996995 | 1767.979  | 2         |           |         |       | 1767.975464 | 110.9     | AIVAIENPADVSVISSR |           |           |                 |                 |                   |
| 7        | 27          |             |                             | 884.996995 | 1767.979  | 2         |           |         |       | 1767.975464 | 105.41    | AIVAIENPADVSVISSR |           |           |                 |                 |                   |
| 7        | 27          | IPI00399036 | PREDICTED: similar to 40:   | 738.454888 | 1474.895  | 2         | 1         | 3.45    | 0.00  | 1474.889572 | 20.41     | RKSDGIYIINLK      |           |           |                 |                 |                   |
| 7        | 27          |             |                             | 884.996995 | 1767.979  | 2         |           |         |       | 1767.975464 | 102.69    | AIVAIENPADVSVISSR |           |           |                 |                 |                   |
| 7        | 27          |             |                             | 884.996995 | 1767.979  | 2         |           |         |       | 1767.975464 | 110.9     | AIVAIENPADVSVISSR |           |           |                 |                 |                   |
| 7        | 27          |             |                             | 884.996995 | 1767.979  | 2         |           |         |       | 1767.975464 | 105.41    | AIVAIENPADVSVISSR |           |           |                 |                 |                   |
| 7        | 27          | IPI00411639 | Laminin receptor-like prote | 738.454888 | 1474.895  | 2         | 1         | 3.45    | 0.00  | 1474.889572 | 20.41     | RKSDGIYIINLK      |           |           |                 |                 |                   |
| 7        | 27          |             |                             | 884.996995 | 1767.979  | 2         |           |         |       | 1767.975464 | 102.69    | AIVAIENPADVSVISSR |           |           |                 |                 |                   |
| 7        | 27          |             |                             | 884.996995 | 1767.979  | 2         |           |         |       | 1767.975464 | 110.9     | AIVAIENPADVSVISSR |           |           |                 |                 |                   |
| 7        | 27          |             |                             | 884.996995 | 1767.979  | 2         |           |         |       | 1767.975464 | 105.41    | AIVAIENPADVSVISSR |           |           |                 |                 |                   |
| 7        | 27          | IPI00413108 | 33 kDa protein              | 738.454888 | 1474.895  | 2         | 1         | 3.45    | 0.00  | 1474.889572 | 20.41     | RKSDGIYIINLK      |           |           |                 |                 |                   |
| 7        | 27          |             |                             | 884.996995 | 1767.979  | 2         |           |         |       | 1767.975464 | 102.69    | AIVAIENPADVSVISSR |           |           |                 |                 |                   |
| 7        | 27          |             |                             | 884.996995 | 1767.979  | 2         |           |         |       | 1767.975464 | 110.9     | AIVAIENPADVSVISSR |           |           |                 |                 |                   |
| 7        | 27          |             |                             | 884.996995 | 1767.979  | 2         |           |         |       | 1767.975464 | 105.41    | AIVAIENPADVSVISSR |           |           |                 |                 |                   |
| 7        | 27          | IPI00456731 | hypothetical protein LOC3   | 738.454888 | 1474.895  | 2         | 1         | 3.45    | 0.00  | 1474.889572 | 20.41     | RKSDGIYIINLK      |           |           |                 |                 |                   |
| 7        | 27          |             |                             | 884.996995 | 1767.979  | 2         |           |         |       | 1767.975464 | 102.69    | AIVAIENPADVSVISSR |           |           |                 |                 |                   |
| 7        | 27          |             |                             | 884.996995 | 1767.979  | 2         |           |         |       | 1767.975464 | 110.9     | AIVAIENPADVSVISSR |           |           |                 |                 |                   |
| 7        | 27          |             |                             | 884.996995 | 1767.979  | 2         |           |         |       | 1767.975464 | 105.41    | AIVAIENPADVSVISSR |           |           |                 |                 |                   |
| 7        | 27          | IPI00553164 | 40S ribosomal protein SA    | 738.454888 | 1474.895  | 2         | 1         | 3.45    | 0.00  | 1474.889572 | 20.41     | RKSDGIYIINLK      |           |           |                 |                 |                   |
| 7        | 27          |             |                             | 884.996995 | 1767.979  | 2         |           |         |       | 1767.975464 | 102.69    | AIVAIENPADVSVISSR |           |           |                 |                 |                   |
| 7        | 27          |             |                             | 884.996995 | 1767.979  | 2         |           |         |       | 1767.975464 | 110.9     | AIVAIENPADVSVISSR |           |           |                 |                 |                   |
| 7        | 27          |             |                             | 884.996995 | 1767.979  | 2         |           |         |       | 1767.975464 | 105.41    | AIVAIENPADVSVISSR |           |           |                 |                 |                   |
| 7        | 27          | IPI00745789 | PREDICTED: similar to 40:   | 738.454888 | 1474.895  | 2         | 1         | 3.45    | 0.00  | 1474.889572 | 20.41     | RKSDGIYIINLK      |           |           |                 |                 |                   |
| 7        | 27          |             |                             | 884.996995 | 1767.979  | 2         |           |         |       | 1767.975464 | 102.69    | AIVAIENPADVSVISSR |           |           |                 |                 |                   |
| 7        | 27          |             |                             | 884.996995 | 1767.979  | 2         |           |         |       | 1767.975464 | 110.9     | AIVAIENPADVSVISSR |           |           |                 |                 |                   |
| 7        | 27          |             |                             | 884.996995 | 1767.979  | 2         |           |         |       | 1767.975464 | 105.41    | AIVAIENPADVSVISSR |           |           |                 |                 |                   |
| 7        | 28          | IPI00023748 | Nascent polypeptide-assoc   | 821.936362 | 1641.858  | 2         | 1         | 3.02    | 0.00  | 1641.859787 | 104.75    | IEDLSQQAQLAAAEK   | 821.9364  | 823.9489  | 12              | 3.97            | 3.02              |

| Band num | prot_hit_nu | prot_acc    | prot_desc                  | pep_exp_mz | pep_exp_n | pep_exp_z | quantific | average | stdev | pep_calc_mr | pep_score | pep_seq          | light m/z | heavy m/z | light intensity | heavy intensity | ratio light/heavy |
|----------|-------------|-------------|----------------------------|------------|-----------|-----------|-----------|---------|-------|-------------|-----------|------------------|-----------|-----------|-----------------|-----------------|-------------------|
| 7        | 28          |             |                            | 821.936362 | 1641.858  | 2         |           |         |       | 1641.859787 | 97.38     | IEDLSQQQLAAAEK   |           |           |                 |                 |                   |
| 7        | 28          |             |                            | 821.936362 | 1641.858  | 2         |           |         |       | 1641.859787 | 78.51     | IEDLSQQQLAAAEK   |           |           |                 |                 |                   |
| 7        | 29          | IPI00152151 | CDNA FLJ44003 fis, clone   | 912.941009 | 1823.867  | 2         | 1         | 3.46    | 0.00  | 1823.863556 | 61.94     | MELDLEPDTSYGGTLR | 912.941   | 914.9536  | 28.4            | 8.21            | 3.46              |
| 7        | 29          |             |                            | 912.941009 | 1823.867  | 2         |           |         |       | 1823.863556 | 96.89     | MELDLEPDTSYGGTLR |           |           |                 |                 |                   |
| 7        | 29          |             |                            | 912.941009 | 1823.867  | 2         |           |         |       | 1823.863556 | 85.73     | MELDLEPDTSYGGTLR |           |           |                 |                 |                   |
| 7        | 29          |             |                            | 920.937786 | 1839.861  | 2         |           |         |       | 1839.858475 | 38.67     | MELDLEPDTSYGGTLR |           |           |                 |                 |                   |
| 7        | 29          |             |                            | 920.937786 | 1839.861  | 2         |           |         |       | 1839.858475 | 23        | MELDLEPDTSYGGTLR |           |           |                 |                 |                   |
| 7        | 29          | IPI00446175 | CDNA FLJ42659 fis, clone   | 912.941009 | 1823.867  | 2         | 1         | 3.46    | 0.00  | 1823.863556 | 61.94     | MELDLEPDTSYGGTLR |           |           |                 |                 |                   |
| 7        | 29          |             |                            | 912.941009 | 1823.867  | 2         |           |         |       | 1823.863556 | 96.89     | MELDLEPDTSYGGTLR |           |           |                 |                 |                   |
| 7        | 29          |             |                            | 912.941009 | 1823.867  | 2         |           |         |       | 1823.863556 | 85.73     | MELDLEPDTSYGGTLR |           |           |                 |                 |                   |
| 7        | 29          |             |                            | 920.937786 | 1839.861  | 2         |           |         |       | 1839.858475 | 38.67     | MELDLEPDTSYGGTLR |           |           |                 |                 |                   |
| 7        | 29          |             |                            | 920.937786 | 1839.861  | 2         |           |         |       | 1839.858475 | 23        | MELDLEPDTSYGGTLR |           |           |                 |                 |                   |
| 7        | 29          | IPI00743542 | 8 kDa protein              | 912.941009 | 1823.867  | 2         | 1         | 3.46    | 0.00  | 1823.863556 | 61.94     | MELDLEPDTSYGGTLR |           |           |                 |                 |                   |
| 7        | 29          |             |                            | 912.941009 | 1823.867  | 2         |           |         |       | 1823.863556 | 96.89     | MELDLEPDTSYGGTLR |           |           |                 |                 |                   |
| 7        | 29          |             |                            | 912.941009 | 1823.867  | 2         |           |         |       | 1823.863556 | 85.73     | MELDLEPDTSYGGTLR |           |           |                 |                 |                   |
| 7        | 29          |             |                            | 920.937786 | 1839.861  | 2         |           |         |       | 1839.858475 | 38.67     | MELDLEPDTSYGGTLR |           |           |                 |                 |                   |
| 7        | 29          |             |                            | 920.937786 | 1839.861  | 2         |           |         |       | 1839.858475 | 23        | MELDLEPDTSYGGTLR |           |           |                 |                 |                   |
| 7        | 29          | IPI00749302 | Hypothetical protein DKFZ  | 912.941009 | 1823.867  | 2         | 1         | 3.46    | 0.00  | 1823.863556 | 61.94     | MELDLEPDTSYGGTLR |           |           |                 |                 |                   |
| 7        | 29          |             |                            | 912.941009 | 1823.867  | 2         |           |         |       | 1823.863556 | 96.89     | MELDLEPDTSYGGTLR |           |           |                 |                 |                   |
| 7        | 29          |             |                            | 912.941009 | 1823.867  | 2         |           |         |       | 1823.863556 | 85.73     | MELDLEPDTSYGGTLR |           |           |                 |                 |                   |
| 7        | 29          |             |                            | 920.937786 | 1839.861  | 2         |           |         |       | 1839.858475 | 38.67     | MELDLEPDTSYGGTLR |           |           |                 |                 |                   |
| 7        | 29          |             |                            | 920.937786 | 1839.861  | 2         |           |         |       | 1839.858475 | 23        | MELDLEPDTSYGGTLR |           |           |                 |                 |                   |
| 7        | 30          | IPI00026268 | Guanine nucleotide-binding | 346.210782 | 690.407   | 2         | 2         | 3.50    | 0.11  | 690.408905  | 21.07     | LFDLR            |           |           |                 |                 |                   |
| 7        | 30          |             |                            | 417.270166 | 832.5258  | 2         |           |         |       | 832.530746  | 25.6      | VHAIPLR          |           |           |                 |                 |                   |
| 7        | 30          |             |                            | 519.278344 | 1036.542  | 2         |           |         |       | 1036.543808 | 42.42     | AGVLAGHDNR       |           |           |                 |                 |                   |
| 7        | 30          |             |                            | 346.521427 | 1036.542  | 3         |           |         |       | 1036.543808 | 44.42     | AGVLAGHDNR       |           |           |                 |                 |                   |
| 7        | 30          |             |                            | 523.296547 | 1044.579  | 2         |           |         |       | 1044.583954 | 22.97     | LLVSASQDGK       |           |           |                 |                 |                   |
| 7        | 30          |             |                            | 523.296547 | 1044.579  | 2         |           |         |       | 1044.583954 | 34        | LLVSASQDGK       |           |           |                 |                 |                   |
| 7        | 30          |             |                            | 537.312647 | 1072.611  | 2         |           |         |       | 1072.615265 | 37.94     | LLVSASQDGK       |           |           |                 |                 |                   |
| 7        | 30          |             |                            | 641.328699 | 1280.643  | 2         |           |         |       | 1280.645905 | 40.8      | LFVSGACDASAK     | 641.3287  | 645.3538  | 3.72            | 1.04            | 3.58              |
| 7        | 30          |             |                            | 455.551406 | 1363.632  | 3         |           |         |       | 1363.636749 | 27.56     | IYAMHWGTDSDR     |           |           |                 |                 |                   |
| 7        | 30          |             |                            | 455.551436 | 1363.632  | 3         |           |         |       | 1363.636749 | 20.21     | IYAMHWGTDSDR     |           |           |                 |                 |                   |
| 7        | 30          |             |                            | 705.389966 | 1408.765  | 2         |           |         |       | 1408.76268  | 41.16     | LIWDSYTTNK       |           |           |                 |                 |                   |
| 7        | 30          |             |                            | 705.389966 | 1408.765  | 2         |           |         |       | 1408.76268  | 45.72     | LIWDSYTTNK       |           |           |                 |                 |                   |
| 7        | 30          |             |                            | 705.390016 | 1408.765  | 2         |           |         |       | 1408.76268  | 45.72     | LIWDSYTTNK       |           |           |                 |                 |                   |
| 7        | 30          |             |                            | 517.905088 | 1550.693  | 3         |           |         |       | 1550.699417 | 40.04     | ELAGHTGYLSCCR    | 517.9052  | 519.2469  | 18              | 5.27            | 3.42              |
| 7        | 30          |             |                            | 517.905214 | 1550.694  | 3         |           |         |       | 1550.699417 | 43.17     | ELAGHTGYLSCCR    |           |           |                 |                 |                   |
| 7        | 30          |             |                            | 517.905214 | 1550.694  | 3         |           |         |       | 1550.699417 | 47.67     | ELAGHTGYLSCCR    |           |           |                 |                 |                   |
| 7        | 30          |             |                            | 517.905214 | 1550.694  | 3         |           |         |       | 1550.699417 | 33.97     | ELAGHTGYLSCCR    |           |           |                 |                 |                   |
| 7        | 30          | IPI00642117 | Beta-subunit signal transd | 346.210782 | 690.407   | 2         | 2         | 3.50    | 0.11  | 690.408905  | 21.07     | LFDLR            |           |           |                 |                 |                   |
| 7        | 30          |             |                            | 417.270166 | 832.5258  | 2         |           |         |       | 832.530746  | 25.6      | VHAIPLR          |           |           |                 |                 |                   |
| 7        | 30          |             |                            | 519.278344 | 1036.542  | 2         |           |         |       | 1036.543808 | 42.42     | AGVLAGHDNR       |           |           |                 |                 |                   |
| 7        | 30          |             |                            | 346.521427 | 1036.542  | 3         |           |         |       | 1036.543808 | 44.42     | AGVLAGHDNR       |           |           |                 |                 |                   |
| 7        | 30          |             |                            | 523.296547 | 1044.579  | 2         |           |         |       | 1044.583954 | 22.97     | LLVSASQDGK       |           |           |                 |                 |                   |
| 7        | 30          |             |                            | 523.296547 | 1044.579  | 2         |           |         |       | 1044.583954 | 34        | LLVSASQDGK       |           |           |                 |                 |                   |
| 7        | 30          |             |                            | 537.312647 | 1072.611  | 2         |           |         |       | 1072.615265 | 37.94     | LLVSASQDGK       |           |           |                 |                 |                   |
| 7        | 30          |             |                            | 641.328699 | 1280.643  | 2         |           |         |       | 1280.645905 | 40.8      | LFVSGACDASAK     |           |           |                 |                 |                   |
| 7        | 30          |             |                            | 455.551406 | 1363.632  | 3         |           |         |       | 1363.636749 | 27.56     | IYAMHWGTDSDR     |           |           |                 |                 |                   |
| 7        | 30          |             |                            | 455.551436 | 1363.632  | 3         |           |         |       | 1363.636749 | 20.21     | IYAMHWGTDSDR     |           |           |                 |                 |                   |
| 7        | 30          |             |                            | 705.389966 | 1408.765  | 2         |           |         |       | 1408.76268  | 41.16     | LIWDSYTTNK       |           |           |                 |                 |                   |
| 7        | 30          |             |                            | 705.389966 | 1408.765  | 2         |           |         |       | 1408.76268  | 45.72     | LIWDSYTTNK       |           |           |                 |                 |                   |
| 7        | 30          |             |                            | 705.390016 | 1408.765  | 2         |           |         |       | 1408.76268  | 45.72     | LIWDSYTTNK       |           |           |                 |                 |                   |
| 7        | 30          |             |                            | 517.905088 | 1550.693  | 3         |           |         |       | 1550.699417 | 40.04     | ELAGHTGYLSCCR    |           |           |                 |                 |                   |
| 7        | 30          |             |                            | 517.905214 | 1550.694  | 3         |           |         |       | 1550.699417 | 43.17     | ELAGHTGYLSCCR    |           |           |                 |                 |                   |
| 7        | 30          |             |                            | 517.905214 | 1550.694  | 3         |           |         |       | 1550.699417 | 47.67     | ELAGHTGYLSCCR    |           |           |                 |                 |                   |
| 7        | 30          |             |                            | 517.905214 | 1550.694  | 3         |           |         |       | 1550.699417 | 33.97     | ELAGHTGYLSCCR    |           |           |                 |                 |                   |
| 7        | 31          | IPI00010779 | Tropomyosin 4              | 636.346476 | 1270.678  | 2         | 2         | 3.95    | 0.63  | 1270.679306 | 44.67     | IQLVEEELDR       | 636.3465  | 638.359   | 19.8            | 5.66            | 3.50              |
| 7        | 31          |             |                            | 821.9058   | 1641.797  | 2         |           |         |       | 1641.798264 | 91.63     | IQALQQQADEAEDR   | 821.9058  | 823.9184  | 2.68            | 0.61            | 4.39              |
| 7        | 31          |             |                            | 821.9058   | 1641.797  | 2         |           |         |       | 1641.798264 | 75.17     | IQALQQQADEAEDR   |           |           |                 |                 |                   |
| 7        | 31          |             |                            | 821.9058   | 1641.797  | 2         |           |         |       | 1641.798264 | 30.99     | IQALQQQADEAEDR   |           |           |                 |                 |                   |
| 7        | 32          | IPI00024911 | Endoplasmic reticulum pro  | 674.852128 | 1347.69   | 2         | 2         | 40.17   | 20.35 | 1347.688736 | 22.63     | ESYPVFYLFDR      | 674.8521  | 676.8647  | 62.2            | 1.14            | 54.56             |
| 7        | 32          |             |                            | 868.913315 | 1735.812  | 2         |           |         |       | 1735.811127 | 80.97     | ILDQGEDFPASEMTR  | 868.9133  | 870.9259  | 2.32            | 0.09            | 25.78             |
| 7        | 32          |             |                            | 868.913315 | 1735.812  | 2         |           |         |       | 1735.811127 | 93.67     | ILDQGEDFPASEMTR  |           |           |                 |                 |                   |

| Band num | prot_hit_nu | prot_acc    | prot_desc                    | pep_exp_mz | pep_exp_n | pep_exp_z | quantific | average | stdev | pep_calc_mr | pep_score | pep_seq                       | light m/z | heavy m/z | light intensity | heavy intensity | ratio light/heavy |
|----------|-------------|-------------|------------------------------|------------|-----------|-----------|-----------|---------|-------|-------------|-----------|-------------------------------|-----------|-----------|-----------------|-----------------|-------------------|
| 7        | 32          |             |                              | 868.913315 | 1735.812  | 2         |           |         |       | 1735.811127 | 21.97     | ILDQGEDFPASEMTR               |           |           |                 |                 |                   |
| 7        | 33          | IPI00328218 | Isoform 2 of Lipolysis-stim  | 429.258191 | 856.5018  | 2         | 3         | 1.20    | 0.03  | 856.504242  | 24.38     | LLEEAVR                       | 429.2583  | 431.2709  | 13.9            | 11.7            | 1.19              |
| 7        | 33          |             |                              | 429.258297 | 856.502   | 2         |           |         |       | 856.504242  | 29.55     | LLEEAVR                       |           |           |                 |                 |                   |
| 7        | 33          |             |                              | 852.390128 | 1702.766  | 2         |           |         |       | 1702.764526 | 77.51     | AMSEVTSLHEDDWR                | 852.3901  | 854.4027  | 2.42            | 2.06            | 1.17              |
| 7        | 33          |             |                              | 852.390128 | 1702.766  | 2         |           |         |       | 1702.764526 | 79.18     | AMSEVTSLHEDDWR                |           |           |                 |                 |                   |
| 7        | 33          |             |                              | 575.627233 | 1723.86   | 3         |           |         |       | 1723.866592 | 22.52     | ELANFDSRPGPPSGR               | 575.6272  | 576.9689  | 5.06            | 4.09            | 1.24              |
| 7        | 33          |             |                              | 575.627233 | 1723.86   | 3         |           |         |       | 1723.866592 | 33.31     | ELANFDSRPGPPSGR               |           |           |                 |                 |                   |
| 7        | 33          |             |                              | 862.939612 | 1723.865  | 2         |           |         |       | 1723.866592 | 23.09     | ELANFDSRPGPPSGR               |           |           |                 |                 |                   |
| 7        | 33          | IPI00409640 | Isoform 1 of Lipolysis-stim  | 429.258191 | 856.5018  | 2         | 3         | 1.20    | 0.03  | 856.504242  | 24.38     | LLEEAVR                       |           |           |                 |                 |                   |
| 7        | 33          |             |                              | 429.258297 | 856.502   | 2         |           |         |       | 856.504242  | 29.55     | LLEEAVR                       |           |           |                 |                 |                   |
| 7        | 33          |             |                              | 852.390128 | 1702.766  | 2         |           |         |       | 1702.764526 | 77.51     | AMSEVTSLHEDDWR                |           |           |                 |                 |                   |
| 7        | 33          |             |                              | 852.390128 | 1702.766  | 2         |           |         |       | 1702.764526 | 79.18     | AMSEVTSLHEDDWR                |           |           |                 |                 |                   |
| 7        | 33          |             |                              | 575.627233 | 1723.86   | 3         |           |         |       | 1723.866592 | 22.52     | ELANFDSRPGPPSGR               |           |           |                 |                 |                   |
| 7        | 33          |             |                              | 575.627233 | 1723.86   | 3         |           |         |       | 1723.866592 | 33.31     | ELANFDSRPGPPSGR               |           |           |                 |                 |                   |
| 7        | 33          |             |                              | 862.939612 | 1723.865  | 2         |           |         |       | 1723.866592 | 23.09     | ELANFDSRPGPPSGR               |           |           |                 |                 |                   |
| 7        | 33          | IPI00409641 | LISCH protein isoform 3      | 429.258191 | 856.5018  | 2         | 3         | 1.20    | 0.03  | 856.504242  | 24.38     | LLEEAVR                       |           |           |                 |                 |                   |
| 7        | 33          |             |                              | 429.258297 | 856.502   | 2         |           |         |       | 856.504242  | 29.55     | LLEEAVR                       |           |           |                 |                 |                   |
| 7        | 33          |             |                              | 852.390128 | 1702.766  | 2         |           |         |       | 1702.764526 | 77.51     | AMSEVTSLHEDDWR                |           |           |                 |                 |                   |
| 7        | 33          |             |                              | 852.390128 | 1702.766  | 2         |           |         |       | 1702.764526 | 79.18     | AMSEVTSLHEDDWR                |           |           |                 |                 |                   |
| 7        | 33          |             |                              | 575.627233 | 1723.86   | 3         |           |         |       | 1723.866592 | 22.52     | ELANFDSRPGPPSGR               |           |           |                 |                 |                   |
| 7        | 33          |             |                              | 575.627233 | 1723.86   | 3         |           |         |       | 1723.866592 | 33.31     | ELANFDSRPGPPSGR               |           |           |                 |                 |                   |
| 7        | 33          |             |                              | 862.939612 | 1723.865  | 2         |           |         |       | 1723.866592 | 23.09     | ELANFDSRPGPPSGR               |           |           |                 |                 |                   |
| 7        | 33          | IPI00641640 | LISCH protein isoform 1      | 429.258191 | 856.5018  | 2         | 3         | 1.20    | 0.03  | 856.504242  | 24.38     | LLEEAVR                       |           |           |                 |                 |                   |
| 7        | 33          |             |                              | 429.258297 | 856.502   | 2         |           |         |       | 856.504242  | 29.55     | LLEEAVR                       |           |           |                 |                 |                   |
| 7        | 33          |             |                              | 852.390128 | 1702.766  | 2         |           |         |       | 1702.764526 | 77.51     | AMSEVTSLHEDDWR                |           |           |                 |                 |                   |
| 7        | 33          |             |                              | 852.390128 | 1702.766  | 2         |           |         |       | 1702.764526 | 79.18     | AMSEVTSLHEDDWR                |           |           |                 |                 |                   |
| 7        | 33          |             |                              | 575.627233 | 1723.86   | 3         |           |         |       | 1723.866592 | 22.52     | ELANFDSRPGPPSGR               |           |           |                 |                 |                   |
| 7        | 33          |             |                              | 575.627233 | 1723.86   | 3         |           |         |       | 1723.866592 | 33.31     | ELANFDSRPGPPSGR               |           |           |                 |                 |                   |
| 7        | 33          |             |                              | 862.939612 | 1723.865  | 2         |           |         |       | 1723.866592 | 23.09     | ELANFDSRPGPPSGR               |           |           |                 |                 |                   |
| 7        | 34          | IPI00293427 | zinc finger/RING finger 2    | 608.83475  | 1215.655  | 2         | 2         | 2.59    | 0.16  | 1215.659531 | 75.99     | SLGGAVGSVASGAR                | 608.8348  | 610.8474  | 13.4            | 4.97            | 2.70              |
| 7        | 34          |             |                              | 608.834808 | 1215.655  | 2         |           |         |       | 1215.659531 | 78.04     | SLGGAVGSVASGAR                |           |           |                 |                 |                   |
| 7        | 34          |             |                              | 932.151422 | 2793.432  | 3         |           |         |       | 2793.433426 | 24.22     | FPAQVPSAHQPSASGGAAAAAAPAAPAPR | 932.1514  | 933.4931  | 1.04            | 0.42            | 2.48              |
| 7        | 34          |             |                              | 932.151422 | 2793.432  | 3         |           |         |       | 2793.433426 | 36.84     | FPAQVPSAHQPSASGGAAAAAAPAAPAPR |           |           |                 |                 |                   |
| 7        | 35          | IPI00453476 | PREDICTED: similar to Ph     | 393.571786 | 1177.694  | 3         | 3         | 2.72    | 0.50  | 1177.695557 | 41.93     | VLIAAHGNSLR                   | 393.572   | 394.9137  | 20.7            | 7.95            | 2.60              |
| 7        | 35          |             |                              | 393.571974 | 1177.694  | 3         |           |         |       | 1177.695557 | 55.6      | VLIAAHGNSLR                   |           |           |                 |                 |                   |
| 7        | 35          |             |                              | 870.491452 | 1738.968  | 2         |           |         |       | 1738.968216 | 37.42     | ALPFWNEEIVPQIK                | 870.4995  | 874.5166  | 1.34            | 0.41            | 3.27              |
| 7        | 35          |             |                              | 870.491452 | 1738.968  | 2         |           |         |       | 1738.968216 | 63.32     | ALPFWNEEIVPQIK                |           |           |                 |                 |                   |
| 7        | 35          |             |                              | 825.064817 | 2472.173  | 3         |           |         |       | 2472.169586 | 20.73     | SYDVPPPMPEPDHPFYSNISK         |           |           |                 |                 |                   |
| 7        | 35          |             |                              | 827.749326 | 2480.226  | 3         |           |         |       | 2480.212921 | 20.9      | YADLTEDQLPSCESLKDTIAR         | 827.7493  | 830.4327  | 1.67            | 0.73            | 2.29              |
| 7        | 35          |             |                              | 827.749326 | 2480.226  | 3         |           |         |       | 2480.212921 | 27.78     | YADLTEDQLPSCESLKDTIAR         |           |           |                 |                 |                   |
| 7        | 35          |             |                              | 827.749326 | 2480.226  | 3         |           |         |       | 2480.212921 | 20.45     | YADLTEDQLPSCESLKDTIAR         |           |           |                 |                 |                   |
| 7        | 35          | IPI00549725 | Phosphoglycerate mutase      | 393.571786 | 1177.694  | 3         | 3         | 2.72    | 0.50  | 1177.695557 | 41.93     | VLIAAHGNSLR                   |           |           |                 |                 |                   |
| 7        | 35          |             |                              | 393.571974 | 1177.694  | 3         |           |         |       | 1177.695557 | 55.6      | VLIAAHGNSLR                   |           |           |                 |                 |                   |
| 7        | 35          |             |                              | 870.491452 | 1738.968  | 2         |           |         |       | 1738.968216 | 37.42     | ALPFWNEEIVPQIK                |           |           |                 |                 |                   |
| 7        | 35          |             |                              | 870.491452 | 1738.968  | 2         |           |         |       | 1738.968216 | 63.32     | ALPFWNEEIVPQIK                |           |           |                 |                 |                   |
| 7        | 35          |             |                              | 825.064817 | 2472.173  | 3         |           |         |       | 2472.169586 | 20.73     | SYDVPPPMPEPDHPFYSNISK         |           |           |                 |                 |                   |
| 7        | 35          |             |                              | 827.749326 | 2480.226  | 3         |           |         |       | 2480.212921 | 20.9      | YADLTEDQLPSCESLKDTIAR         |           |           |                 |                 |                   |
| 7        | 35          |             |                              | 827.749326 | 2480.226  | 3         |           |         |       | 2480.212921 | 27.78     | YADLTEDQLPSCESLKDTIAR         |           |           |                 |                 |                   |
| 7        | 35          |             |                              | 827.749326 | 2480.226  | 3         |           |         |       | 2480.212921 | 20.45     | YADLTEDQLPSCESLKDTIAR         |           |           |                 |                 |                   |
| 7        | 35          | IPI00740800 | PREDICTED: similar to Ph     | 393.571786 | 1177.694  | 3         | 3         | 2.72    | 0.50  | 1177.695557 | 41.93     | VLIAAHGNSLR                   |           |           |                 |                 |                   |
| 7        | 35          |             |                              | 393.571974 | 1177.694  | 3         |           |         |       | 1177.695557 | 55.6      | VLIAAHGNSLR                   |           |           |                 |                 |                   |
| 7        | 35          |             |                              | 870.491452 | 1738.968  | 2         |           |         |       | 1738.968216 | 37.42     | ALPFWNEEIVPQIK                |           |           |                 |                 |                   |
| 7        | 35          |             |                              | 870.491452 | 1738.968  | 2         |           |         |       | 1738.968216 | 63.32     | ALPFWNEEIVPQIK                |           |           |                 |                 |                   |
| 7        | 35          |             |                              | 825.064817 | 2472.173  | 3         |           |         |       | 2472.169586 | 20.73     | SYDVPPPMPEPDHPFYSNISK         |           |           |                 |                 |                   |
| 7        | 35          |             |                              | 827.749326 | 2480.226  | 3         |           |         |       | 2480.212921 | 20.9      | YADLTEDQLPSCESLKDTIAR         |           |           |                 |                 |                   |
| 7        | 35          |             |                              | 827.749326 | 2480.226  | 3         |           |         |       | 2480.212921 | 27.78     | YADLTEDQLPSCESLKDTIAR         |           |           |                 |                 |                   |
| 7        | 35          |             |                              | 827.749326 | 2480.226  | 3         |           |         |       | 2480.212921 | 20.45     | YADLTEDQLPSCESLKDTIAR         |           |           |                 |                 |                   |
| 7        | 36          | IPI00554788 | 49 kDa protein               | 535.321523 | 1068.628  | 2         | 2         | 3.31    | 0.82  | 1068.631577 | 44.38     | IVLQIDNAR                     | 535.3215  | 537.3341  | 16              | 4.12            | 3.88              |
| 7        | 36          |             |                              | 535.321523 | 1068.628  | 2         |           |         |       | 1068.631577 | 40.53     | IVLQIDNAR                     |           |           |                 |                 |                   |
| 7        | 36          |             |                              | 674.35611  | 1346.698  | 2         |           |         |       | 1346.696686 | 67.3      | AQIFANTVDNAR                  | 674.3561  | 676.3687  | 3.55            | 1.3             | 2.73              |
| 7        | 36          |             |                              | 674.356391 | 1346.698  | 2         |           |         |       | 1346.696686 | 66.75     | AQIFANTVDNAR                  |           |           |                 |                 |                   |
| 7        | 36          | IPI00784347 | Keratin, type I cytoskeletal | 535.321523 | 1068.628  | 2         | 2         | 3.31    | 0.82  | 1068.631577 | 44.38     | IVLQIDNAR                     |           |           |                 |                 |                   |
| 7        | 36          |             |                              | 535.321523 | 1068.628  | 2         |           |         |       | 1068.631577 | 40.53     | IVLQIDNAR                     |           |           |                 |                 |                   |

| Band num | prot_hit_nu | prot_acc    | prot_desc                   | pep_exp_mz | pep_exp_n | pep_exp_z | quantific | average | stdev | pep_calc_mr | pep_score | pep_seq                 | light m/z | heavy m/z | light intensity | heavy intensity | ratio light/heavy |      |
|----------|-------------|-------------|-----------------------------|------------|-----------|-----------|-----------|---------|-------|-------------|-----------|-------------------------|-----------|-----------|-----------------|-----------------|-------------------|------|
| 7        | 36          |             |                             | 674.35611  | 1346.698  | 2         |           |         |       | 1346.696686 | 67.3      | AQIFANTVDNAR            |           |           |                 |                 |                   |      |
| 7        | 36          |             |                             | 674.356391 | 1346.698  | 2         |           |         |       | 1346.696686 | 66.75     | AQIFANTVDNAR            |           |           |                 |                 |                   |      |
| 7        | 37          | IPI00024095 | Annexin A3                  | 479.288678 | 956.5628  | 2         | 3         | 2.17    | 0.62  | 956.567917  | 38.64     | ALLTLADGR               | 479.2887  | 481.3012  |                 | 3.6             | 1.37              | 2.63 |
| 7        | 37          |             |                             | 807.370686 | 1612.727  | 2         |           |         |       | 1612.724091 | 62.88     | SLGDDISSETSGDFR         | 807.3707  | 809.3832  | 1.48            | 0.61            | 2.43              |      |
| 7        | 37          |             |                             | 851.454732 | 1700.895  | 2         |           |         |       | 1700.896896 | 82.89     | GAGTNEALIEILTR          | 851.4547  | 853.4673  | 3.61            | 2.46            | 1.47              |      |
| 7        | 37          | IPI00745868 | 36 kDa protein              | 479.288678 | 956.5628  | 2         | 3         | 2.17    | 0.62  | 956.567917  | 38.64     | ALLTLADGR               |           |           |                 |                 |                   |      |
| 7        | 37          |             |                             | 807.370686 | 1612.727  | 2         |           |         |       | 1612.724091 | 62.88     | SLGDDISSETSGDFR         |           |           |                 |                 |                   |      |
| 7        | 37          |             |                             | 851.454732 | 1700.895  | 2         |           |         |       | 1700.896896 | 82.89     | GAGTNEALIEILTR          |           |           |                 |                 |                   |      |
| 7        | 38          | IPI00022624 | Retinoic acid-induced prote | 388.718599 | 775.4226  | 2         | 1         | 5.59    | 0.00  | 775.425278  | 20.04     | EFISIPR                 |           |           |                 |                 |                   |      |
| 7        | 38          |             |                             | 731.391824 | 1460.769  | 2         |           |         |       | 1460.764755 | 70.42     | TNNVVFSELSAPR           | 731.3918  | 733.4044  | 12.3            | 2.2             | 5.59              |      |
| 7        | 38          |             |                             | 731.391824 | 1460.769  | 2         |           |         |       | 1460.764755 | 77.59     | TNNVVFSELSAPR           |           |           |                 |                 |                   |      |
| 7        | 39          | IPI00022284 | Major prion protein precurs | 800.378169 | 1598.742  | 2         | 1         | 1.14    | 0.00  | 1598.745697 | 81.24     | VVEQMCITQYER            | 800.3782  | 802.3907  | 1.25            | 1.1             | 1.14              |      |
| 7        | 39          |             |                             | 800.378169 | 1598.742  | 2         |           |         |       | 1598.745697 | 50.76     | VVEQMCITQYER            |           |           |                 |                 |                   |      |
| 7        | 39          | IPI00382843 | Prion protein               | 800.378169 | 1598.742  | 2         | 1         | 1.14    | 0.00  | 1598.745697 | 81.24     | VVEQMCITQYER            |           |           |                 |                 |                   |      |
| 7        | 39          |             |                             | 800.378169 | 1598.742  | 2         |           |         |       | 1598.745697 | 50.76     | VVEQMCITQYER            |           |           |                 |                 |                   |      |
| 7        | 40          | IPI00001734 | Isoform 1 of Phosphoserine  | 524.295551 | 1046.577  | 2         | 4         | 4.05    | 1.50  | 1046.578476 | 55.51     | DDLGFALR                | 524.2956  | 526.3081  | 13.3            | 4.06            | 3.28              |      |
| 7        | 40          |             |                             | 524.296439 | 1046.578  | 2         |           |         |       | 1046.578476 | 45.97     | DDLGFALR                |           |           |                 |                 |                   |      |
| 7        | 40          |             |                             | 607.347394 | 1212.68   | 2         |           |         |       | 1212.685059 | 25.48     | IINNTENLVR              | 607.3474  | 609.36    | 39.7            | 13.5            | 2.94              |      |
| 7        | 40          |             |                             | 607.347394 | 1212.68   | 2         |           |         |       | 1212.685059 | 44.29     | IINNTENLVR              |           |           |                 |                 |                   |      |
| 7        | 40          |             |                             | 607.347394 | 1212.68   | 2         |           |         |       | 1212.685059 | 48.22     | IINNTENLVR              |           |           |                 |                 |                   |      |
| 7        | 40          |             |                             | 609.342324 | 1216.67   | 2         |           |         |       | 1216.672775 | 34.46     | ELLAVPDNYK              | 609.3423  | 613.3674  | 140             | 37.3            | 3.75              |      |
| 7        | 40          |             |                             | 438.238974 | 1311.695  | 3         |           |         |       | 1311.69931  | 24.67     | GVGIVLEMSHR             |           |           |                 |                 |                   |      |
| 7        | 40          | IPI00219478 | Isoform 2 of Phosphoserine  | 524.295551 | 1046.577  | 2         | 4         | 4.05    | 1.50  | 1046.578476 | 55.51     | DDLGFALR                | 438.239   | 439.5807  | 10.8            | 1.73            | 6.24              |      |
| 7        | 40          |             |                             | 524.296439 | 1046.578  | 2         |           |         |       | 1046.578476 | 45.97     | DDLGFALR                |           |           |                 |                 |                   |      |
| 7        | 40          |             |                             | 607.347394 | 1212.68   | 2         |           |         |       | 1212.685059 | 25.48     | IINNTENLVR              |           |           |                 |                 |                   |      |
| 7        | 40          |             |                             | 607.347394 | 1212.68   | 2         |           |         |       | 1212.685059 | 44.29     | IINNTENLVR              |           |           |                 |                 |                   |      |
| 7        | 40          |             |                             | 607.347394 | 1212.68   | 2         |           |         |       | 1212.685059 | 48.22     | IINNTENLVR              |           |           |                 |                 |                   |      |
| 7        | 40          |             |                             | 609.342324 | 1216.67   | 2         |           |         |       | 1216.672775 | 34.46     | ELLAVPDNYK              |           |           |                 |                 |                   |      |
| 7        | 40          |             |                             | 438.238974 | 1311.695  | 3         |           |         |       | 1311.69931  | 24.67     | GVGIVLEMSHR             |           |           |                 |                 |                   |      |
| 7        | 41          | IPI00171199 | Isoform 2 of Proteasome su  | 623.343415 | 1244.672  | 2         | 1         | 3.04    | 0.00  | 1244.674881 | 70.17     | AVENSSTAIGIR            | 623.3434  | 625.356   | 7.35            | 2.42            | 3.04              |      |
| 7        | 41          |             |                             | 623.343415 | 1244.672  | 2         |           |         |       | 1244.674881 | 61.29     | AVENSSTAIGIR            |           |           |                 |                 |                   |      |
| 7        | 41          | IPI00419249 | proteasome alpha 3 subun    | 623.343415 | 1244.672  | 2         | 1         | 3.04    | 0.00  | 1244.674881 | 70.17     | AVENSSTAIGIR            |           |           |                 |                 |                   |      |
| 7        | 41          |             |                             | 623.343415 | 1244.672  | 2         |           |         |       | 1244.674881 | 61.29     | AVENSSTAIGIR            |           |           |                 |                 |                   |      |
| 7        | 42          | IPI00465431 | Galectin-3                  | 445.757133 | 889.4997  | 2         | 2         | 3.33    | 0.09  | 889.504593  | 24.11     | IALDFQR                 | 445.7571  | 447.7697  | 32              | 9.81            | 3.26              |      |
| 7        | 42          |             |                             | 559.96369  | 1676.869  | 3         |           |         |       | 1676.877106 | 55.31     | VAVNDAHLLQYNHR          | 559.9637  | 561.3054  | 15.1            | 4.45            | 3.39              |      |
| 7        | 42          |             |                             | 559.96369  | 1676.869  | 3         |           |         |       | 1676.877106 | 35.13     | VAVNDAHLLQYNHR          |           |           |                 |                 |                   |      |
| 7        | 42          |             |                             | 420.22544  | 1676.873  | 4         |           |         |       | 1676.877106 | 42.77     | VAVNDAHLLQYNHR          |           |           |                 |                 |                   |      |
| 7        | 43          | IPI00291006 | Malate dehydrogenase, mi    | 631.380678 | 1260.747  | 2         | 2         | 4.03    | 1.14  | 1260.746597 | 37.2      | IFGVTTLDIVR             | 631.3807  | 633.3932  | 12.9            | 4               | 3.23              |      |
| 7        | 43          |             |                             | 631.380678 | 1260.747  | 2         |           |         |       | 1260.746597 | 44.56     | IFGVTTLDIVR             |           |           |                 |                 |                   |      |
| 7        | 43          |             |                             | 925.08152  | 1848.148  | 2         |           |         |       | 1848.147202 | 53.46     | VAVLGASGGIGQPLSLLK      | 825.0815  | 929.1066  | 1.79            | 0.37            | 4.84              |      |
| 7        | 44          | IPI00025512 | Heat-shock protein beta-1   | 552.305438 | 1102.596  | 2         | 2         | 2.72    | 2.03  | 1102.600662 | 37.29     | QLSSGVSEIR              | 552.3054  | 554.318   | 9.52            | 2.29            | 4.16              |      |
| 7        | 44          |             |                             | 967.519561 | 1933.025  | 2         |           |         |       | 1933.018082 | 72.07     | LATQSGNEITPVTFESR       | 967.5196  | 969.5321  | 1.72            | 1.34            | 1.28              |      |
| 7        | 45          | IPI00022977 | Creatine kinase B-type      | 666.385073 | 1330.756  | 2         | 2         | 4.23    | 0.94  | 1330.752075 | 48.42     | VLTPELYAELR             | 666.3851  | 668.3976  | 5.35            | 1.5             | 3.57              |      |
| 7        | 45          |             |                             | 666.385073 | 1330.756  | 2         |           |         |       | 1330.752075 | 36.04     | VLTPELYAELR             |           |           |                 |                 |                   |      |
| 7        | 45          |             |                             | 807.943142 | 1613.872  | 2         |           |         |       | 1613.864853 | 43.68     | LAVEALSSLDGDLAGR        | 807.9431  | 809.9557  | 9.59            | 1.96            | 4.89              |      |
| 7        | 46          | IPI00022202 | Isoform A of Phosphate ca   | 695.378014 | 1388.741  | 2         | 1         | 3.59    | 0.00  | 1388.743652 | 45.07     | IQTQPGYANTLR            | 695.378   | 697.3906  | 7.8             | 2.17            | 3.59              |      |
| 7        | 46          |             |                             | 695.378014 | 1388.741  | 2         |           |         |       | 1388.743652 | 54.93     | IQTQPGYANTLR            |           |           |                 |                 |                   |      |
| 7        | 46          | IPI00215777 | Isoform B of Phosphate ca   | 695.378014 | 1388.741  | 2         | 1         | 3.59    | 0.00  | 1388.743652 | 45.07     | IQTQPGYANTLR            |           |           |                 |                 |                   |      |
| 7        | 46          |             |                             | 695.378014 | 1388.741  | 2         |           |         |       | 1388.743652 | 54.93     | IQTQPGYANTLR            |           |           |                 |                 |                   |      |
| 7        | 47          | IPI00418262 | Fructose-bisphosphate ald   | 320.723756 | 639.433   | 2         | 2         | 6.24    | 1.67  | 639.434387  | 23.95     | IVAPGK                  | 320.7238  | 324.7489  | 1.93            | 0.26            | 7.42              |      |
| 7        | 47          |             |                             | 410.270323 | 818.5261  | 2         |           |         |       | 818.529007  | 25.64     | VLAAYYK                 | 410.2703  | 414.2954  | 17.7            | 3.5             | 5.06              |      |
| 7        | 47          |             |                             | 1151.08542 | 2300.156  | 2         |           |         |       | 2300.151978 | 25.55     | GVVPLAGTDGETTTQGLDGLSER | 1151.094  | 1153.106  | 3.07            | 0               | L                 |      |
| 7        | 47          |             |                             | 1151.09373 | 2300.173  | 2         |           |         |       | 2300.151978 | 59.61     | GVVPLAGTDGETTTQGLDGLSER |           |           |                 |                 |                   |      |
| 7        | 48          | IPI00023048 | Elongation factor 1-delta   | 693.883426 | 1385.752  | 2         | 2         | 4.11    | 1.19  | 1385.75386  | 54.47     | IASLEVENQSLR            | 693.8834  | 695.896   | 5.06            | 1.55            | 3.26              |      |
| 7        | 48          |             |                             | 484.582666 | 1450.726  | 3         |           |         |       | 1450.737534 | 37.06     | ATAPQTQHVSPMR           | 484.5827  | 485.9244  | 1.83            | 0.37            | 4.95              |      |
| 7        | 48          |             |                             | 484.582666 | 1450.726  | 3         |           |         |       | 1450.737534 | 32.75     | ATAPQTQHVSPMR           |           |           |                 |                 |                   |      |
| 7        | 48          | IPI00064086 | EEF1D protein               | 693.883426 | 1385.752  | 2         | 2         | 4.11    | 1.19  | 1385.75386  | 54.47     | IASLEVENQSLR            |           |           |                 |                 |                   |      |
| 7        | 48          |             |                             | 484.582666 | 1450.726  | 3         |           |         |       | 1450.737534 | 37.06     | ATAPQTQHVSPMR           |           |           |                 |                 |                   |      |
| 7        | 48          |             |                             | 484.582666 | 1450.726  | 3         |           |         |       | 1450.737534 | 32.75     | ATAPQTQHVSPMR           |           |           |                 |                 |                   |      |
| 7        | 48          | IPI00100137 | PREDICTED: similar to Elc   | 693.883426 | 1385.752  | 2         | 2         | 4.11    | 1.19  | 1385.75386  | 54.47     | IASLEVENQSLR            |           |           |                 |                 |                   |      |
| 7        | 48          |             |                             | 484.582666 | 1450.726  | 3         |           |         |       | 1450.737534 | 37.06     | ATAPQTQHVSPMR           |           |           |                 |                 |                   |      |
| 7        | 48          |             |                             | 484.582666 | 1450.726  | 3         |           |         |       | 1450.737534 | 32.75     | ATAPQTQHVSPMR           |           |           |                 |                 |                   |      |
| 7        | 48          | IPI00642971 | eukaryotic translation elon | 693.883426 | 1385.752  | 2         | 2         | 4.11    | 1.19  | 1385.75386  | 54.47     | IASLEVENQSLR            |           |           |                 |                 |                   |      |

| Band num | prot_hit_nu | prot_acc    | prot_desc                     | pep_exp_mz | pep_exp_n | pep_exp_z | quantific | average | stdev | pep_calc_mr | pep_score | pep_seq            | light m/z | heavy m/z | light intensity | heavy intensity | ratio light/heavy |
|----------|-------------|-------------|-------------------------------|------------|-----------|-----------|-----------|---------|-------|-------------|-----------|--------------------|-----------|-----------|-----------------|-----------------|-------------------|
| 7        | 48          |             |                               | 484.582666 | 1450.726  | 3         |           |         |       | 1450.737534 | 37.06     | ATAPQTQHVSPMR      |           |           |                 |                 |                   |
| 7        | 48          |             |                               | 484.582666 | 1450.726  | 3         |           |         |       | 1450.737534 | 32.75     | ATAPQTQHVSPMR      |           |           |                 |                 |                   |
| 7        | 49          | IPI00011253 | 40S ribosomal protein S3      | 658.854069 | 1315.694  | 2         | 1         | 5.51    | 0.00  | 1315.694244 | 54.01     | GLCAIAQAESLR       | 658.8541  | 660.8666  | 3.03            | 0.55            | 5.51              |
| 7        | 50          | IPI00024175 | Isoform 1 of Proteasome s     | 831.954987 | 1661.895  | 2         | 1         | 2.43    | 0.00  | 1661.89003  | 33.81     | LTVEDPVTVEYITR     | 831.955   | 833.9675  | 3.6             | 1.48            | 2.43              |
| 7        | 50          |             |                               | 831.954987 | 1661.895  | 2         |           |         |       | 1661.89003  | 47.82     | LTVEDPVTVEYITR     |           |           |                 |                 |                   |
| 7        | 50          | IPI00154509 | Isoform 1 of Proteasome s     | 831.954987 | 1661.895  | 2         | 1         | 2.43    | 0.00  | 1661.89003  | 33.81     | LTVEDPVTVEYITR     |           |           |                 |                 |                   |
| 7        | 50          |             |                               | 831.954987 | 1661.895  | 2         |           |         |       | 1661.89003  | 47.82     | LTVEDPVTVEYITR     |           |           |                 |                 |                   |
| 7        | 50          | IPI00218372 | Isoform 2 of Proteasome s     | 831.954987 | 1661.895  | 2         | 1         | 2.43    | 0.00  | 1661.89003  | 33.81     | LTVEDPVTVEYITR     |           |           |                 |                 |                   |
| 7        | 50          |             |                               | 831.954987 | 1661.895  | 2         |           |         |       | 1661.89003  | 47.82     | LTVEDPVTVEYITR     |           |           |                 |                 |                   |
| 7        | 50          | IPI00218373 | Isoform 4 of Proteasome s     | 831.954987 | 1661.895  | 2         | 1         | 2.43    | 0.00  | 1661.89003  | 33.81     | LTVEDPVTVEYITR     |           |           |                 |                 |                   |
| 7        | 50          |             |                               | 831.954987 | 1661.895  | 2         |           |         |       | 1661.89003  | 47.82     | LTVEDPVTVEYITR     |           |           |                 |                 |                   |
| 7        | 50          | IPI00219950 | Isoform 2 of Proteasome s     | 831.954987 | 1661.895  | 2         | 1         | 2.43    | 0.00  | 1661.89003  | 33.81     | LTVEDPVTVEYITR     |           |           |                 |                 |                   |
| 7        | 50          |             |                               | 831.954987 | 1661.895  | 2         |           |         |       | 1661.89003  | 47.82     | LTVEDPVTVEYITR     |           |           |                 |                 |                   |
| 7        | 50          | IPI00647380 | OTTHUMP00000031453            | 831.954987 | 1661.895  | 2         | 1         | 2.43    | 0.00  | 1661.89003  | 33.81     | LTVEDPVTVEYITR     |           |           |                 |                 |                   |
| 7        | 50          |             |                               | 831.954987 | 1661.895  | 2         |           |         |       | 1661.89003  | 47.82     | LTVEDPVTVEYITR     |           |           |                 |                 |                   |
| 7        | 50          | IPI00647838 | Proteasome subunit alpha      | 831.954987 | 1661.895  | 2         | 1         | 2.43    | 0.00  | 1661.89003  | 33.81     | LTVEDPVTVEYITR     |           |           |                 |                 |                   |
| 7        | 50          |             |                               | 831.954987 | 1661.895  | 2         |           |         |       | 1661.89003  | 47.82     | LTVEDPVTVEYITR     |           |           |                 |                 |                   |
| 7        | 50          | IPI00748423 | Isoform 3 of Proteasome s     | 831.954987 | 1661.895  | 2         | 1         | 2.43    | 0.00  | 1661.89003  | 33.81     | LTVEDPVTVEYITR     |           |           |                 |                 |                   |
| 7        | 50          |             |                               | 831.954987 | 1661.895  | 2         |           |         |       | 1661.89003  | 47.82     | LTVEDPVTVEYITR     |           |           |                 |                 |                   |
| 7        | 51          | IPI00305551 | Guanine nucleotide-bindin     | 858.492004 | 1714.969  | 2         | 1         | 2.80    | 0.00  | 1714.964203 | 53.12     | IATLGLYPTQQDVL     | 858.492   | 860.5046  | 2.69            | 0.96            | 2.80              |
| 7        | 52          | IPI00216587 | 40S ribosomal protein S8      | 873.977013 | 1745.939  | 2         | 1         | 3.37    | 0.00  | 1745.933594 | 49.17     | IIDVVYNASNNELVR    | 873.977   | 875.9896  | 2.56            | 0.76            | 3.37              |
| 7        | 52          |             |                               | 873.977013 | 1745.939  | 2         |           |         |       | 1745.933594 | 20.38     | IIDVVYNASNNELVR    |           |           |                 |                 |                   |
| 7        | 52          | IPI00645201 | Ribosomal protein S8          | 873.977013 | 1745.939  | 2         | 1         | 3.37    | 0.00  | 1745.933594 | 49.17     | IIDVVYNASNNELVR    |           |           |                 |                 |                   |
| 7        | 52          |             |                               | 873.977013 | 1745.939  | 2         |           |         |       | 1745.933594 | 20.38     | IIDVVYNASNNELVR    |           |           |                 |                 |                   |
| 7        | 53          | IPI00002821 | 60S ribosomal protein L14     | 622.326872 | 1242.639  | 2         | 1         | 4.33    | 0.00  | 1242.641495 | 36.76     | ALVDGPCTQVR        | 622.3229  | 624.3394  | 3.85            | 0.89            | 4.33              |
| 7        | 53          |             |                               | 622.326872 | 1242.639  | 2         |           |         |       | 1242.641495 | 37.38     | ALVDGPCTQVR        |           |           |                 |                 |                   |
| 7        | 53          | IPI00069693 | Similar to ribosomal protei   | 622.326872 | 1242.639  | 2         | 1         | 4.33    | 0.00  | 1242.641495 | 36.76     | ALVDGPCTQVR        |           |           |                 |                 |                   |
| 7        | 53          |             |                               | 622.326872 | 1242.639  | 2         |           |         |       | 1242.641495 | 37.38     | ALVDGPCTQVR        |           |           |                 |                 |                   |
| 7        | 53          | IPI00555744 | RPL14 protein                 | 622.326872 | 1242.639  | 2         | 1         | 4.33    | 0.00  | 1242.641495 | 36.76     | ALVDGPCTQVR        |           |           |                 |                 |                   |
| 7        | 53          |             |                               | 622.326872 | 1242.639  | 2         |           |         |       | 1242.641495 | 37.38     | ALVDGPCTQVR        |           |           |                 |                 |                   |
| 7        | 53          | IPI00739139 | PREDICTED: similar to 60S     | 622.326872 | 1242.639  | 2         | 1         | 4.33    | 0.00  | 1242.641495 | 36.76     | ALVDGPCTQVR        |           |           |                 |                 |                   |
| 7        | 53          |             |                               | 622.326872 | 1242.639  | 2         |           |         |       | 1242.641495 | 37.38     | ALVDGPCTQVR        |           |           |                 |                 |                   |
| 7        | 53          | IPI00745587 | 16 kDa protein                | 622.326872 | 1242.639  | 2         | 1         | 4.33    | 0.00  | 1242.641495 | 36.76     | ALVDGPCTQVR        |           |           |                 |                 |                   |
| 7        | 53          |             |                               | 622.326872 | 1242.639  | 2         |           |         |       | 1242.641495 | 37.38     | ALVDGPCTQVR        |           |           |                 |                 |                   |
| 7        | 54          | IPI00218200 | B-cell receptor-associated    | 530.28299  | 1058.551  | 2         | 1         | 4.75    | 0.00  | 1058.556686 | 48.02     | AENQVLAMR          | 530.283   | 532.2956  | 9.92            | 2.09            | 4.75              |
| 7        | 54          | IPI00787597 | PREDICTED: similar to B-c     | 530.28299  | 1058.551  | 2         | 1         | 4.75    | 0.00  | 1058.556686 | 48.02     | AENQVLAMR          |           |           |                 |                 |                   |
| 7        | 55          | IPI00007188 | ADP/ATP translocase 2         | 465.761254 | 929.508   | 2         | 1         | 6.16    | 0.00  | 929.510727  | 47.15     | GAWSNVLR           | 465.7613  | 467.7738  | 8.68            | 1.41            | 6.16              |
| 7        | 55          | IPI00022891 | ADP/ATP translocase 1         | 465.761254 | 929.508   | 2         | 1         | 6.16    | 0.00  | 929.510727  | 47.15     | GAWSNVLR           |           |           |                 |                 |                   |
| 7        | 55          | IPI00291467 | ADP/ATP translocase 3         | 465.761254 | 929.508   | 2         | 1         | 6.16    | 0.00  | 929.510727  | 47.15     | GAWSNVLR           |           |           |                 |                 |                   |
| 7        | 56          | IPI00024650 | Monocarboxylate transport     | 684.350209 | 1366.686  | 2         | 1         | 5.79    | 0.00  | 1366.686539 | 45.15     | DLHDANTDLIGR       | 684.3502  | 686.3628  | 3.36            | 0.58            | 5.79              |
| 7        | 56          | IPI00643709 | Solute carrier family 16      | 684.350209 | 1366.686  | 2         | 1         | 5.79    | 0.00  | 1366.686539 | 45.15     | DLHDANTDLIGR       |           |           |                 |                 |                   |
| 7        | 56          | IPI00646589 | Solute carrier family 16      | 684.350209 | 1366.686  | 2         | 1         | 5.79    | 0.00  | 1366.686539 | 45.15     | DLHDANTDLIGR       |           |           |                 |                 |                   |
| 7        | 57          | IPI00008522 | Sodium channel protein ty     | 913.94096  | 1825.867  | 2         | 1         | 27.52   | 0.00  | 1825.878052 | 30.08     | MEFFIGSLETNNFRR    | 913.941   | 915.9536  | 42.1            | 1.53            | 27.52             |
| 7        | 57          |             |                               | 913.94096  | 1825.867  | 2         |           |         |       | 1825.878052 | 20.55     | MEFFIGSLETNNFRR    |           |           |                 |                 |                   |
| 7        | 57          |             |                               | 913.941022 | 1825.867  | 2         |           |         |       | 1825.878052 | 33.22     | MEFFIGSLETNNFRR    |           |           |                 |                 |                   |
| 7        | 57          |             |                               | 913.941042 | 1825.868  | 2         |           |         |       | 1825.878052 | 25.53     | MEFFIGSLETNNFRR    |           |           |                 |                 |                   |
| 7        | 57          |             |                               | 913.94122  | 1825.868  | 2         |           |         |       | 1825.878052 | 27.5      | MEFFIGSLETNNFRR    |           |           |                 |                 |                   |
| 7        | 57          | IPI00783779 | 221 kDa protein               | 913.94096  | 1825.867  | 2         | 1         | 27.52   | 0.00  | 1825.878052 | 30.08     | MEFFIGSLETNNFRR    |           |           |                 |                 |                   |
| 7        | 57          |             |                               | 913.94096  | 1825.867  | 2         |           |         |       | 1825.878052 | 20.55     | MEFFIGSLETNNFRR    |           |           |                 |                 |                   |
| 7        | 57          |             |                               | 913.941022 | 1825.867  | 2         |           |         |       | 1825.878052 | 33.22     | MEFFIGSLETNNFRR    |           |           |                 |                 |                   |
| 7        | 57          |             |                               | 913.941042 | 1825.868  | 2         |           |         |       | 1825.878052 | 25.53     | MEFFIGSLETNNFRR    |           |           |                 |                 |                   |
| 7        | 57          |             |                               | 913.94122  | 1825.868  | 2         |           |         |       | 1825.878052 | 27.5      | MEFFIGSLETNNFRR    |           |           |                 |                 |                   |
| 7        | 58          | IPI00556231 | Hypothetical protein          | 602.335808 | 1202.657  | 2         | 1         | 20.00   | 0.00  | 1202.660507 | 41.62     | EITALAPSAMK        | 602.3358  | 606.3609  | 10.6            | 0.53            | 20.00             |
| 7        | 59          | IPI00413641 | Aldose reductase              | 460.762588 | 919.5106  | 2         | 2         | 3.29    | 0.56  | 919.515137  | 30.96     | VAIDVGYR           | 460.7626  | 462.7751  | 39.4            | 13.6            | 2.90              |
| 7        | 59          |             |                               | 465.291402 | 928.5683  | 2         |           |         |       | 928.573013  | 40.24     | TTAQLVLR           | 465.2914  | 467.304   | 17.6            | 4.78            | 3.68              |
| 7        | 60          | IPI00008986 | Large neutral amino acids     | 865.424037 | 1728.834  | 2         | 1         | 2.08    | 0.00  | 1728.830246 | 37.58     | SADGSAPAGEGEGVTLQR | 865.424   | 867.4366  | 0.52            | 0.25            | 2.08              |
| 7        | 60          |             |                               | 865.425498 | 1728.836  | 2         |           |         |       | 1728.830246 | 29.32     | SADGSAPAGEGEGVTLQR |           |           |                 |                 |                   |
| 7        | 61          | IPI00219678 | Eukaryotic translation initia | 688.850108 | 1375.686  | 2         | 1         | 1.49    | 0.00  | 1375.685532 | 38.82     | VVTDTDTELAR        | 688.8501  | 690.8627  | 1.85            | 1.24            | 1.49              |
| 7        | 62          | IPI00019755 | Glutathione transferase orr   | 551.836135 | 1101.658  | 2         | 1         | 3.99    | 0.00  | 1101.657043 | 38.07     | VPSLVGSFIR         | 551.8361  | 553.8487  | 15.8            | 3.96            | 3.99              |
| 7        | 62          | IPI00642936 | Glutathione S-transferase c   | 551.836135 | 1101.658  | 2         | 1         | 3.99    | 0.00  | 1101.657043 | 38.07     | VPSLVGSFIR         |           |           |                 |                 |                   |
| 7        | 63          | IPI00171819 | Isoform 2 of FERM, RhoGE      | 442.780975 | 883.5474  | 2         | 1         | L       | 0.00  | 883.540329  | 37.95     | ALTADLPK           | 442.781   | 446.8061  | 49.9            | 0               | L                 |
| 7        | 63          | IPI00744221 | Isoform 1 of FERM, RhoGE      | 442.780975 | 883.5474  | 2         | 1         | L       | 0.00  | 883.540329  | 37.95     | ALTADLPK           |           |           |                 |                 |                   |
| 7        | 64          | IPI00179757 | Kinesin-like protein KIF1C    | 538.791431 | 1075.568  | 2         | 1         | L       | 0.00  | 1075.560791 | 37.56     | VGVQVMDIK          | 538.7914  | 542.8165  | 22.9            | 0               | L                 |

| Band num | prot_hit_nu | prot_acc    | prot_desc                    | pep_exp_mz | pep_exp_n | pep_exp_z | quantific | average | stdev | pep_calc_mr | pep_score | pep_seq          | light m/z | heavy m/z | light intensity | heavy intensity | ratio light/heavy |
|----------|-------------|-------------|------------------------------|------------|-----------|-----------|-----------|---------|-------|-------------|-----------|------------------|-----------|-----------|-----------------|-----------------|-------------------|
| 7        | 64          |             |                              | 538.791431 | 1075.568  | 2         |           |         |       | 1075.560791 | 27.4      | VGQVDMDIK        |           |           |                 |                 |                   |
| 7        | 65          | IPI00019976 | Delta-interacting protein A  | 385.748116 | 769.4817  | 2         | 1         | 2.62    | 0.00  | 769.480988  | 26.7      | LAALVQR          | 385.7478  | 387.7603  | 104             | 39.7            | 2.62              |
| 7        | 65          |             |                              | 385.748116 | 769.4817  | 2         |           |         |       | 769.480988  | 20.12     | LAALVQR          |           |           |                 |                 |                   |
| 7        | 65          |             |                              | 385.748116 | 769.4817  | 2         |           |         |       | 769.480988  | 32.5      | LAALVQR          |           |           |                 |                 |                   |
| 7        | 65          |             |                              | 385.748116 | 769.4817  | 2         |           |         |       | 769.480988  | 30.54     | LAALVQR          |           |           |                 |                 |                   |
| 7        | 66          | IPI00217439 | Isoform 1 of Codanin-1       | 573.830593 | 1145.647  | 2         | 1         | L       | 0.00  | 1145.650253 | 27.83     | MAAVLESLLR       | 573.8332  | 577.8583  | 6.93            |                 | 0 L               |
| 7        | 66          |             |                              | 573.830593 | 1145.647  | 2         |           |         |       | 1145.650253 | 34.69     | MAAVLESLLR       |           |           |                 |                 |                   |
| 7        | 66          |             |                              | 573.830593 | 1145.647  | 2         |           |         |       | 1145.650253 | 20.52     | MAAVLESLLR       |           |           |                 |                 |                   |
| 7        | 66          |             |                              | 573.833168 | 1145.652  | 2         |           |         |       | 1145.650253 | 29.3      | MAAVLESLLR       |           |           |                 |                 |                   |
| 7        | 66          |             |                              | 573.833168 | 1145.652  | 2         |           |         |       | 1145.650253 | 28.86     | MAAVLESLLR       |           |           |                 |                 |                   |
| 7        | 66          |             |                              | 573.833168 | 1145.652  | 2         |           |         |       | 1145.650253 | 21.65     | MAAVLESLLR       |           |           |                 |                 |                   |
| 7        | 66          | IPI00386747 | Isoform 2 of Codanin-1       | 573.830593 | 1145.647  | 2         | 1         | L       | 0.00  | 1145.650253 | 27.83     | MAAVLESLLR       |           |           |                 |                 |                   |
| 7        | 66          |             |                              | 573.830593 | 1145.647  | 2         |           |         |       | 1145.650253 | 34.69     | MAAVLESLLR       |           |           |                 |                 |                   |
| 7        | 66          |             |                              | 573.830593 | 1145.647  | 2         |           |         |       | 1145.650253 | 20.52     | MAAVLESLLR       |           |           |                 |                 |                   |
| 7        | 66          |             |                              | 573.833168 | 1145.652  | 2         |           |         |       | 1145.650253 | 29.3      | MAAVLESLLR       |           |           |                 |                 |                   |
| 7        | 66          |             |                              | 573.833168 | 1145.652  | 2         |           |         |       | 1145.650253 | 28.86     | MAAVLESLLR       |           |           |                 |                 |                   |
| 7        | 66          |             |                              | 573.833168 | 1145.652  | 2         |           |         |       | 1145.650253 | 21.65     | MAAVLESLLR       |           |           |                 |                 |                   |
| 7        | 67          | IPI00442228 | CDNA FLJ16563 fis, clone     | 581.827599 | 1161.641  | 2         | 1         | 2.41    | 0.00  | 1161.631927 | 33.4      | TWGPTFRNK        | 581.8276  | 585.8527  | 1.83            | 0.76            | 2.41              |
| 7        | 67          | IPI00443642 | CDNA FLJ46815 fis, clone     | 581.827599 | 1161.641  | 2         |           |         |       | 1161.631927 | 33.4      | TWGPTFRNK        |           |           |                 |                 |                   |
| 7        | 68          | IPI00178743 | ALMS1                        | 563.827187 | 1125.64   | 2         | 1         | 7.06    | 0.00  | 1125.639359 | 32.88     | QALLDSPLNK       | 563.8272  | 565.8397  | 3.32            | 0.47            | 7.06              |
| 7        | 68          | IPI00740123 | Isoform 2 of Alstrom syndr   | 563.827187 | 1125.64   | 2         | 1         | 7.06    | 0.00  | 1125.639359 | 32.88     | QALLDSPLNK       |           |           |                 |                 |                   |
| 7        | 68          | IPI00740909 | Isoform 3 of Alstrom syndr   | 563.827187 | 1125.64   | 2         | 1         | 7.06    | 0.00  | 1125.639359 | 32.88     | QALLDSPLNK       |           |           |                 |                 |                   |
| 7        | 69          | IPI00032137 | Alpha-actinin-3              | 949.521974 | 1897.029  | 2         | 1         | 8.35    | 0.00  | 1897.034653 | 32.53     | RQFAAQANAIGPWQAK | 949.522   | 951.4345  | 4.59            | 0.55            | 8.35              |
| 7        | 69          |             |                              | 949.521974 | 1897.029  | 2         |           |         |       | 1897.034653 | 22.31     | RQFAAQANAIGPWQAK |           |           |                 |                 |                   |
| 7        | 70          | IPI00029702 | Isoform 1 of Protein tyrosin | 525.266299 | 1048.518  | 2         | 1         | L       | 0.00  | 1048.524765 | 21.03     | KDCTLDNK         | 525.2663  | 529.2914  | 3.9             |                 | 0 L               |
| 7        | 70          |             |                              | 525.266299 | 1048.518  | 2         |           |         |       | 1048.524765 | 32.4      | KDCTLDNK         |           |           |                 |                 |                   |
| 7        | 70          | IPI00216435 | Isoform 2 of Protein tyrosin | 525.266299 | 1048.518  | 2         | 1         | L       | 0.00  | 1048.524765 | 21.03     | KDCTLDNK         |           |           |                 |                 |                   |
| 7        | 70          |             |                              | 525.266299 | 1048.518  | 2         |           |         |       | 1048.524765 | 32.4      | KDCTLDNK         |           |           |                 |                 |                   |
| 7        | 70          | IPI00443767 | CDNA FLJ46514 fis, clone     | 525.266299 | 1048.518  | 2         | 1         | L       | 0.00  | 1048.524765 | 21.03     | KDCTLDNK         |           |           |                 |                 |                   |
| 7        | 70          |             |                              | 525.266299 | 1048.518  | 2         |           |         |       | 1048.524765 | 32.4      | KDCTLDNK         |           |           |                 |                 |                   |
| 7        | 71          | IPI00396154 | PHD finger protein 20-like   | 815.903567 | 1629.793  | 2         | 1         | L       | 0.00  | 1629.805649 | 20.32     | SSGSSLASRSMFTEK  | 815.9036  | 817.9161  | 6.04            |                 | 0 L               |
| 7        | 71          |             |                              | 815.903567 | 1629.793  | 2         |           |         |       | 1629.805649 | 21.2      | SSGSSLASRSMFTEK  |           |           |                 |                 |                   |
| 7        | 71          |             |                              | 815.903567 | 1629.793  | 2         |           |         |       | 1629.805649 | 31.96     | SSGSSLASRSMFTEK  |           |           |                 |                 |                   |
| 7        | 72          | IPI00026154 | Glucosidase 2 subunit beta   | 624.320394 | 1246.626  | 2         | 1         | 4.48    | 0.00  | 1246.625168 | 31.17     | SLEDQVEMLR       | 624.3204  | 626.333   | 4.93            | 1.1             | 4.48              |
| 7        | 72          | IPI00419384 | protein kinase C substrate   | 624.320394 | 1246.626  | 2         | 1         | 4.48    | 0.00  | 1246.625168 | 31.17     | SLEDQVEMLR       |           |           |                 |                 |                   |
| 7        | 73          | IPI00219617 | Ribose-phosphate pyrophc     | 430.7295   | 859.4444  | 2         | 1         | 3.20    | 0.00  | 859.440826  | 30.24     | MKHCTK           | 430.7295  | 436.7672  | 8.87            | 2.77            | 3.20              |
| 7        | 73          | IPI00718888 | phosphoribosyl pyrophospl    | 430.7295   | 859.4444  | 2         | 1         | 3.20    | 0.00  | 859.440826  | 30.24     | MKHCTK           |           |           |                 |                 |                   |
| 7        | 74          | IPI00010896 | Chloride intracellular chanr | 533.290987 | 1064.567  | 2         | 2         | 3.48    | 0.58  | 1064.567902 | 29.96     | GFTIPEAFR        | 533.291   | 535.3035  | 7.47            | 1.92            | 3.89              |
| 7        | 74          |             |                              | 533.290987 | 1064.567  | 2         |           |         |       | 1064.567902 | 30.12     | IGNCPFSQR        | 533.7733  | 55.78589  | 2.86            | 0.93            | 3.08              |
| 7        | 74          | IPI00646484 | Chloride intracellular chanr | 533.290987 | 1064.567  | 2         | 2         | 3.48    | 0.58  | 1064.567902 | 29.96     | GFTIPEAFR        |           |           |                 |                 |                   |
| 7        | 74          |             |                              | 533.290987 | 1064.567  | 2         |           |         |       | 1064.567902 | 30.12     | IGNCPFSQR        |           |           |                 |                 |                   |
| 7        | 75          | IPI00449906 | Isoform 1 of Rho guanine r   | 458.739299 | 915.464   | 2         | 1         | 34.00   | 0.00  | 915.468597  | 30.07     | DEVQELR          | 458.7393  | 460.7519  | 10.2            | 0.3             | 34.00             |
| 7        | 75          | IPI00641543 | Rho guanine nucleotide ex    | 458.739299 | 915.464   | 2         | 1         | 34.00   | 0.00  | 915.468597  | 30.07     | DEVQELR          |           |           |                 |                 |                   |
